# Supplementary material
Source: bioRxiv or medRxiv preprint supplement (http://medrxiv.stage.highwire.org/highwire/filestream/96583/field_highwire_adjunct_files/4/2020.09.12.20192922-5.zip)

|                                                    |     |             |                 |                     |                     |              |              |
|----------------------------------------------------|-----|-------------|-----------------|---------------------|---------------------|--------------|--------------|
| rs1378559                                          | T/C |             | 23:21380266     |                     |                     |              |              |
|                                                    | +-  |             | het_P:          | 0.008               | het_I:              | 85.9         |              |
|                                                    | ngt | info        | p_value         | f_ca(n)             | f_co(n)             | ln(OR)       | STDerr       |
| PGC_SCZ wave3 (incl. wave2) eur males              | -   | 1.78        | 1.28e-10        | 0.865(32446)        | 0.847(33056)        | 0.083        | 0.013        |
| PGC_SCZ wave3 (incl. wave2) eur females            | -   | 0.88        | 5.06e-07        | 0.857(17196)        | 0.846(34149)        | 0.109        | 0.022        |
| PGC_SCZ wave3 (incl. wave2) asn males              | -   | 1.54        | 0.00519         | 0.762(6630.0)       | 0.739(6018.0)       | 0.069        | 0.025        |
| PGC_SCZ wave3 (incl. wave2) asn females            | -   | 0.78        | 0.499           | 0.731(4988.0)       | 0.728(8548.0)       | 0.023        | 0.034        |
| PGC_SCZ wave3 (incl. wave2) trios                  | -   | 1.58        | 0.174           | 0.775(2918.0)       | 0.762(2918.0)       | 0.048        | 0.035        |
| <b>PGC_SCZ wave3 (incl. wave2)</b>                 | -   | <b>1.29</b> | <b>3.14e-17</b> | <b>0.838(64178)</b> | <b>0.824(84689)</b> | <b>0.079</b> | <b>0.009</b> |
| Decode - Replication                               | -   | 1.00        | 0.913           | 0.844(1361)         | 0.844(380)          | -0.081       | 0.059        |
| <b>PGC_SCZ wave3 (incl. wave2 and replication)</b> | -   | <b>1.29</b> | <b>3.08e-16</b> | <b>0.838(65763)</b> | <b>0.824(85446)</b> | <b>0.075</b> | <b>0.009</b> |

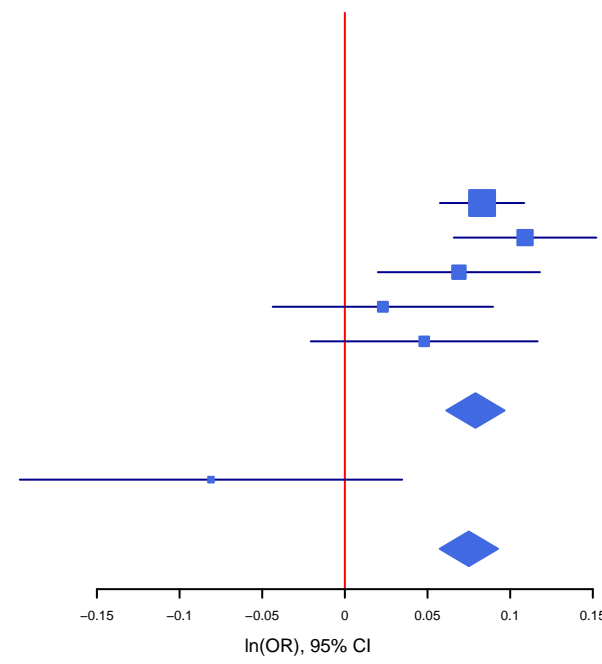

rs2361468

G/A

23:68377485

++

het\_P:

0.966

het\_I:

0.0

|                                                    | ngt | info        | p_value         | f_ca(n)             | f_co(n)             | ln(OR)        | STDerr       |
|----------------------------------------------------|-----|-------------|-----------------|---------------------|---------------------|---------------|--------------|
| PGC_SCZ wave3 (incl. wave2) eur males              | -   | 1.91        | 7.14e-11        | 0.733(32446)        | 0.759(33056)        | -0.066        | 0.01         |
| PGC_SCZ wave3 (incl. wave2) eur females            | -   | 0.95        | 1.03e-05        | 0.742(17420)        | 0.754(34526)        | -0.074        | 0.017        |
| PGC_SCZ wave3 (incl. wave2) asn males              | -   | nan         | nan             | nan(nan)            | nan(nan)            | nan           | nan          |
| PGC_SCZ wave3 (incl. wave2) asn females            | -   | nan         | nan             | nan(nan)            | nan(nan)            | nan           | nan          |
| PGC_SCZ wave3 (incl. wave2) trios                  | -   | nan         | nan             | nan(nan)            | nan(nan)            | nan           | nan          |
| <b>PGC_SCZ wave3 (incl. wave2)</b>                 | -   | <b>1.42</b> | <b>4.33e-15</b> | <b>0.736(49866)</b> | <b>0.756(67582)</b> | <b>-0.068</b> | <b>0.009</b> |
| Decode - Replication                               | -   | 1.00        | 0.0906          | 0.794(1361)         | 0.794(380)          | -0.07         | 0.052        |
| <b>PGC_SCZ wave3 (incl. wave2 and replication)</b> | -   | <b>1.42</b> | <b>2.4e-15</b>  | <b>0.737(65763)</b> | <b>0.756(85446)</b> | <b>-0.068</b> | <b>0.009</b> |

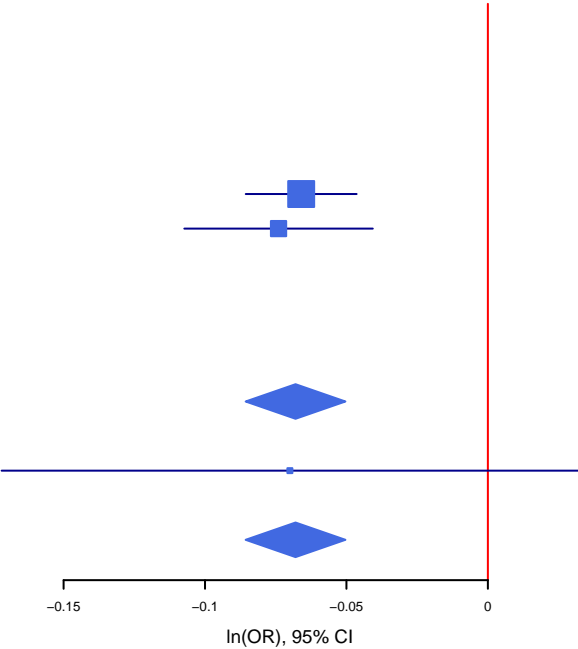

rs5943629

|     |                         |
|-----|-------------------------|
| A/C | 23:29276070             |
| ++  | het_P: 0.688 het_I: 0.0 |

|                                                    | ngt | info        | p_value         | f_ca(n)             | f_co(n)             | ln(OR)       | STDerr       |
|----------------------------------------------------|-----|-------------|-----------------|---------------------|---------------------|--------------|--------------|
| PGC_SCZ wave3 (incl. wave2) eur males              | -   | 1.97        | 7.76e-05        | 0.325(32246)        | 0.312(32976)        | 0.036        | 0.009        |
| PGC_SCZ wave3 (incl. wave2) eur females            | -   | 0.98        | 2.61e-05        | 0.323(17420)        | 0.308(34526)        | 0.065        | 0.016        |
| PGC_SCZ wave3 (incl. wave2) asn males              | -   | 1.91        | 0.00174         | 0.516(6352.0)       | 0.487(5752.0)       | 0.063        | 0.02         |
| PGC_SCZ wave3 (incl. wave2) asn females            | -   | 0.96        | 0.826           | 0.522(4988.0)       | 0.512(8548.0)       | 0.006        | 0.027        |
| PGC_SCZ wave3 (incl. wave2) trios                  | -   | 1.61        | 0.125           | 0.427(2918.0)       | 0.41(2918.0)        | 0.046        | 0.03         |
| <b>PGC_SCZ wave3 (incl. wave2)</b>                 | -   | <b>1.45</b> | <b>2.18e-10</b> | <b>0.363(63924)</b> | <b>0.346(84720)</b> | <b>0.044</b> | <b>0.007</b> |
| Decode - Replication                               | -   | 1.00        | 0.0866          | 0.253(1361)         | 0.253(380)          | 0.063        | 0.046        |
| <b>PGC_SCZ wave3 (incl. wave2 and replication)</b> | -   | <b>1.45</b> | <b>8.35e-11</b> | <b>0.361(65763)</b> | <b>0.346(85446)</b> | <b>0.044</b> | <b>0.007</b> |

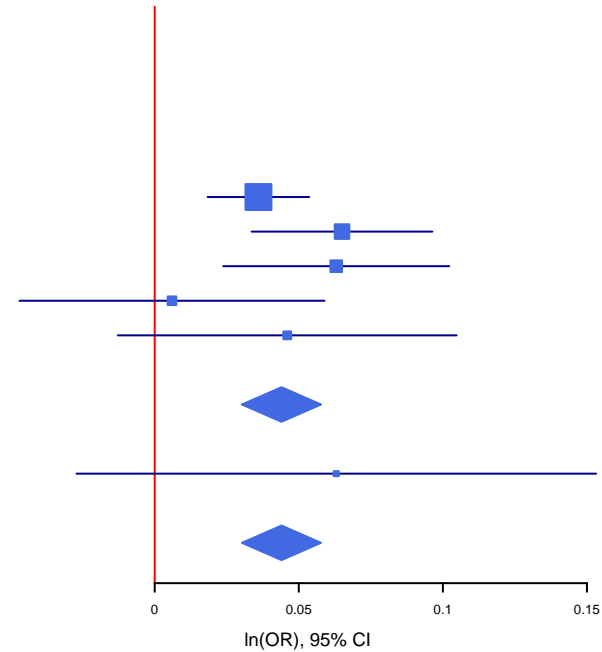

rs12008603

|     |                        |
|-----|------------------------|
| A/C | 23:6021181             |
| --- | het_P: 0.76 het_I: 0.0 |

|                                                    | ngt | info        | p_value         | f_ca(n)             | f_co(n)            | ln(OR)       | STDerr       |
|----------------------------------------------------|-----|-------------|-----------------|---------------------|--------------------|--------------|--------------|
| PGC_SCZ wave3 (incl. wave2) eur males              | -   | 1.99        | 1.05e-05        | 0.767(31966)        | 0.785(32761)       | -0.045       | 0.01         |
| PGC_SCZ wave3 (incl. wave2) eur females            | -   | 0.99        | 0.00019         | 0.776(17420)        | 0.786(34526)       | -0.064       | 0.017        |
| PGC_SCZ wave3 (incl. wave2) asn males              | -   | 1.98        | 0.622           | 0.919(5543.0)       | 0.92(4675.0)       | -0.02        | 0.04         |
| PGC_SCZ wave3 (incl. wave2) asn females            | -   | 0.99        | 0.26            | 0.919(4988.0)       | 0.921(8548.0)      | -0.056       | 0.05         |
| PGC_SCZ wave3 (incl. wave2) trios                  | -   | 1.62        | 0.11            | 0.854(2918.0)       | 0.866(2918.0)      | -0.069       | 0.043        |
| <b>PGC_SCZ wave3 (incl. wave2)</b>                 | -   | <b>1.46</b> | <b>2.04e-09</b> | <b>0.799(62835)</b> | <b>0.81(83428)</b> | <b>-0.05</b> | <b>0.008</b> |
| Decode - Replication                               | -   | 1.00        | 0.0876          | 0.787(1361)         | 0.787(380)         | -0.065       | 0.048        |
| <b>PGC_SCZ wave3 (incl. wave2 and replication)</b> | -   | <b>1.46</b> | <b>6.95e-10</b> | <b>0.799(65763)</b> | <b>0.81(85446)</b> | <b>-0.05</b> | <b>0.008</b> |

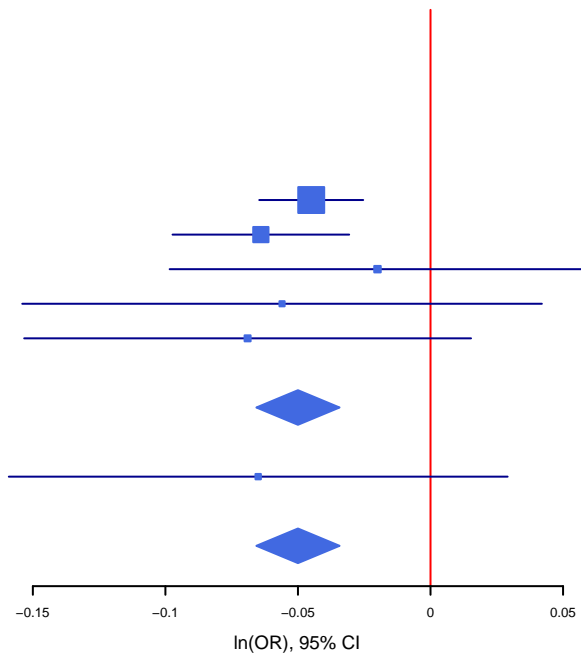

rs34539323

C/G

23:12206015

het\_P:

0.606

het\_I:

0.0

---

---

|                                         | ngt | info | p_value  | f_ca(n)       | f_co(n)       | ln(OR) | STDerr |
|-----------------------------------------|-----|------|----------|---------------|---------------|--------|--------|
| PGC_SCZ wave3 (incl. wave2) eur males   | –   | 1.99 | 2.94e–06 | 0.847(31001)  | 0.862(31372)  | –0.058 | 0.012  |
| PGC_SCZ wave3 (incl. wave2) eur females | –   | 0.99 | 0.0724   | 0.856(17420)  | 0.861(34526)  | –0.037 | 0.02   |
| PGC_SCZ wave3 (incl. wave2) asn males   | –   | 1.99 | 0.173    | 0.782(6630.0) | 0.795(6018.0) | –0.032 | 0.023  |
| PGC_SCZ wave3 (incl. wave2) asn females | –   | 0.99 | 0.0081   | 0.791(4988.0) | 0.803(8548.0) | –0.088 | 0.033  |
| PGC_SCZ wave3 (incl. wave2) trios       | –   | 1.61 | 0.0658   | 0.804(2918.0) | 0.821(2918.0) | –0.069 | 0.038  |

PGC\_SCZ wave3 (incl. wave2)

–

1.46

4.69e–09

0.836(62957)

0.849(83382)

–0.053

0.009

Decode – Replication

–

1.00

0.0868

0.879(1361)

0.879(380)

–0.086

0.063

PGC\_SCZ wave3 (incl. wave2 and replication)

–

1.46

1.72e–09

0.837(65763)

0.849(85446)

–0.054

0.009

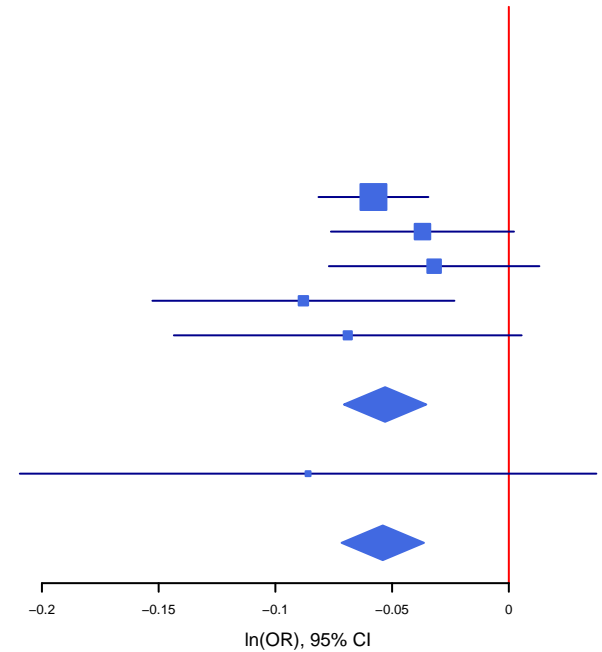

Supplement: Supplementary file [file 2020.09.12.20192922-5.zip]
