# Supplementary material
Source: bioRxiv or medRxiv preprint supplement (http://medrxiv.stage.highwire.org/highwire/filestream/96583/field_highwire_adjunct_files/4/2020.09.12.20192922-5.zip)

| rs13195636                                         | A/C      |             | 6:27509493      |                     |                      |              |              |
|----------------------------------------------------|----------|-------------|-----------------|---------------------|----------------------|--------------|--------------|
|                                                    | ++       |             | het_P:          |                     | 0.828                | het_I:       | 0.0          |
|                                                    | ngt      | info        | p_value         | f_ca(n)             | f_co(n)              | ln(OR)       | STDerr       |
| PGC_SCZ wave3 eur only                             | 0        | 1.00        | 6.55e-40        | 0.926(53386)        | 0.909(77258)         | 0.211        | 0.016        |
| PGC_SCZ wave3 asn only                             | nan      | nan         | nan             | nan(nan)            | nan(nan)             | nan          | nan          |
| PGC_SCZ wave2 only                                 | 0        | 1.00        | 1.46e-24        | 0.925(32998)        | 0.912(43387)         | 0.208        | 0.02         |
| PGC_SCZ wave3 (excl. wave2)                        | 0        | 0.99        | 5.28e-17        | 0.928(20388)        | 0.906(33871)         | 0.215        | 0.026        |
| <b>PGC_SCZ wave3 (incl. wave2)</b>                 | <b>0</b> | <b>1.00</b> | <b>6.55e-40</b> | <b>0.926(53386)</b> | <b>0.909(77258)</b>  | <b>0.211</b> | <b>0.016</b> |
| Decode – Replication                               | 0        | 1.00        | 0.0164          | 0.938(1979)         | 0.932(142627)        | 0.215        | 0.084        |
| <b>PGC_SCZ wave3 (incl. wave2 and replication)</b> | <b>0</b> | <b>1.00</b> | <b>2.9e-41</b>  | <b>0.926(55365)</b> | <b>0.924(219885)</b> | <b>0.21</b>  | <b>0.016</b> |

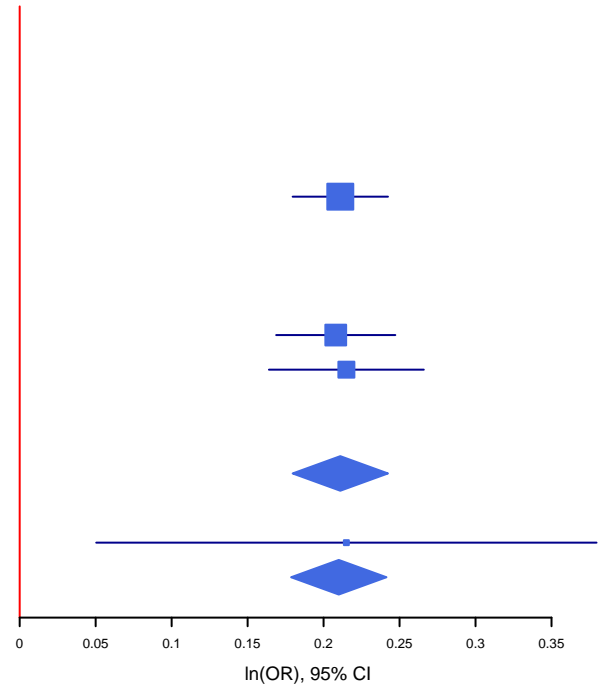

rs58120505

T/C

7:2029867

++

het\_P:

0.893

het\_I:

0.0

ngt info p\_value f\_ca(n) f\_co(n) ln(OR) STDerr

PGC\_SCZ wave3 eur only

2 0.99 2.23e-24 0.602(53386) 0.582(77258) 0.09 0.009

PGC\_SCZ wave3 asn only

0 1.00 0.000522 0.442(14004) 0.425(16757) 0.059 0.017

PGC\_SCZ wave2 only

0 1.00 2.61e-14 0.598(34850) 0.587(44347) 0.084 0.011

PGC\_SCZ wave3 (excl. wave2)

2 0.99 9.99e-14 0.538(32540) 0.525(49668) 0.082 0.011

PGC\_SCZ wave3 (incl. wave2)

2 1.00 1.8e-26 0.569(67390) 0.554(94015) 0.083 0.008

Decode – Replication

0 1.00 0.0782 0.604(1979) 0.569(142627) 0.082 0.039

PGC\_SCZ wave3 (incl. wave2 and replication)

2 1.00 2.84e-27 0.57(69369) 0.563(236642) 0.083 0.008

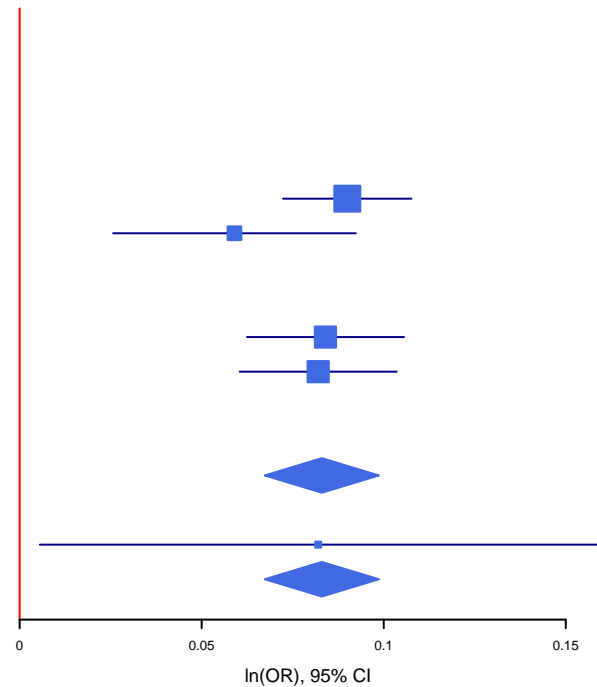

rs4702

G/A

15:91426560

—

het\_P:

0.399

het\_I:

0.0

ngt info p\_value f\_ca(n) f\_co(n) ln(OR) STDerr

PGC\_SCZ wave3 eur only

53 0.95 2.79e-21 0.461(53386) 0.44(77258) 0.084 0.009

PGC\_SCZ wave3 asn only

7 0.79 0.00106 0.479(14004) 0.471(16757) 0.062 0.019

PGC\_SCZ wave2 only

23 0.93 8.77e-11 0.459(34850) 0.44(44347) 0.074 0.011

PGC\_SCZ wave3 (excl. wave2)

37 0.91 2.69e-14 0.471(32540) 0.451(49668) 0.087 0.012

PGC\_SCZ wave3 (incl. wave2)

60 0.92 2.15e-23 0.465(67390) 0.446(94015) 0.08 0.008

Decode – Replication

0 1.00 0.00952 0.46(1979) 0.454(142627) 0.087 0.038

PGC\_SCZ wave3 (incl. wave2 and replication)

60 0.97 1.37e-24 0.465(69369) 0.451(236642) 0.081 0.008

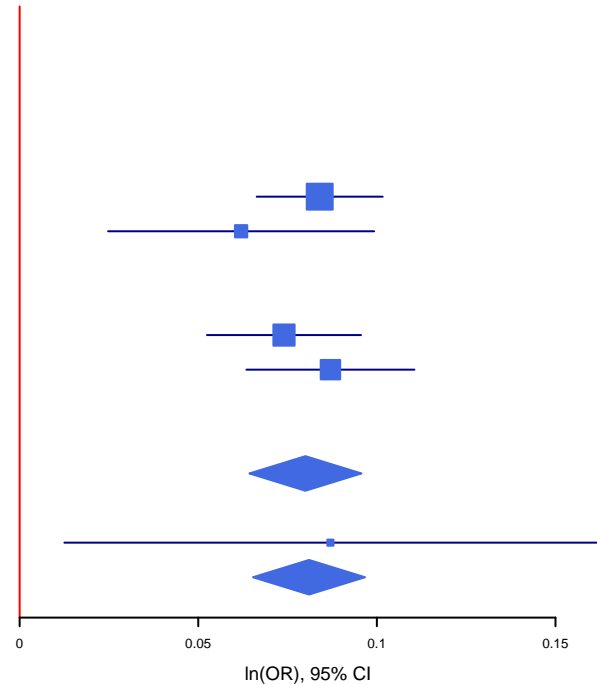

|                                                    |          |             |                 |                     |                      |              |              |
|----------------------------------------------------|----------|-------------|-----------------|---------------------|----------------------|--------------|--------------|
| rs79668541                                         | C/T      |             | 10:104793904    |                     |                      |              |              |
|                                                    | ---      |             | het_P:          |                     | 0.028                | het_I:       | 79.3         |
|                                                    | ngt      | info        | p_value         | f_ca(n)             | f_co(n)              | ln(OR)       | STDerr       |
| PGC_SCZ wave3 eur only                             | 0        | 1.00        | 2.89e-17        | 0.92(53386)         | 0.911(77258)         | 0.131        | 0.016        |
| PGC_SCZ wave3 asn only                             | 0        | 1.00        | 6.93e-08        | 0.751(14004)        | 0.728(16757)         | 0.105        | 0.019        |
| PGC_SCZ wave2 only                                 | 0        | 1.00        | 8.77e-16        | 0.912(34850)        | 0.906(44347)         | 0.153        | 0.019        |
| PGC_SCZ wave3 (excl. wave2)                        | 0        | 1.00        | 3.27e-10        | 0.856(32540)        | 0.854(49668)         | 0.099        | 0.016        |
| <b>PGC_SCZ wave3 (incl. wave2)</b>                 | <b>0</b> | <b>1.00</b> | <b>2.11e-23</b> | <b>0.885(67390)</b> | <b>0.878(94015)</b>  | <b>0.121</b> | <b>0.012</b> |
| Decode – Replication                               | 0        | 1.00        | 0.0389          | 0.906(1979)         | 0.924(142627)        | 0.099        | 0.069        |
| <b>PGC_SCZ wave3 (incl. wave2 and replication)</b> | <b>0</b> | <b>1.00</b> | <b>2.39e-24</b> | <b>0.886(69369)</b> | <b>0.906(236642)</b> | <b>0.121</b> | <b>0.012</b> |

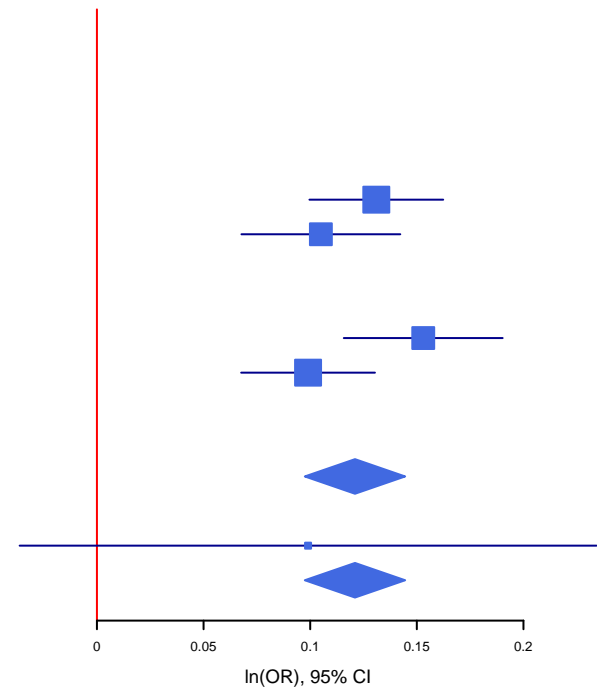

rs10774034

C/T

12:2330458

++

het\_P:

0.935

het\_I:

0.0

| ngt | info | p_value | f_ca(n) | f_co(n) | ln(OR) | STDerr |
|-----|------|---------|---------|---------|--------|--------|
|-----|------|---------|---------|---------|--------|--------|

PGC\_SCZ wave3 eur only

|   |      |          |              |              |        |       |
|---|------|----------|--------------|--------------|--------|-------|
| 7 | 1.00 | 4.67e-21 | 0.586(53386) | 0.604(77258) | -0.082 | 0.009 |
|---|------|----------|--------------|--------------|--------|-------|

PGC\_SCZ wave3 asn only

|   |      |         |              |             |        |       |
|---|------|---------|--------------|-------------|--------|-------|
| 0 | 0.94 | 0.00351 | 0.922(14004) | 0.93(16757) | -0.099 | 0.034 |
|---|------|---------|--------------|-------------|--------|-------|

PGC\_SCZ wave2 only

|   |      |          |              |              |        |       |
|---|------|----------|--------------|--------------|--------|-------|
| 1 | 1.00 | 5.04e-14 | 0.602(34850) | 0.611(44347) | -0.084 | 0.011 |
|---|------|----------|--------------|--------------|--------|-------|

PGC\_SCZ wave3 (excl. wave2)

|   |      |          |              |              |        |       |
|---|------|----------|--------------|--------------|--------|-------|
| 6 | 0.98 | 2.24e-10 | 0.713(32540) | 0.709(49668) | -0.083 | 0.013 |
|---|------|----------|--------------|--------------|--------|-------|

PGC\_SCZ wave3 (incl. wave2)

|   |      |         |              |              |        |       |
|---|------|---------|--------------|--------------|--------|-------|
| 7 | 0.99 | 7.1e-23 | 0.656(67390) | 0.663(94015) | -0.083 | 0.008 |
|---|------|---------|--------------|--------------|--------|-------|

Decode - Replication

|   |      |        |             |               |        |       |
|---|------|--------|-------------|---------------|--------|-------|
| 0 | 1.00 | 0.0966 | 0.608(1979) | 0.602(142627) | -0.083 | 0.038 |
|---|------|--------|-------------|---------------|--------|-------|

PGC\_SCZ wave3 (incl. wave2 and replication)

|   |      |          |              |               |        |       |
|---|------|----------|--------------|---------------|--------|-------|
| 7 | 1.00 | 3.21e-23 | 0.655(69369) | 0.626(236642) | -0.082 | 0.008 |
|---|------|----------|--------------|---------------|--------|-------|

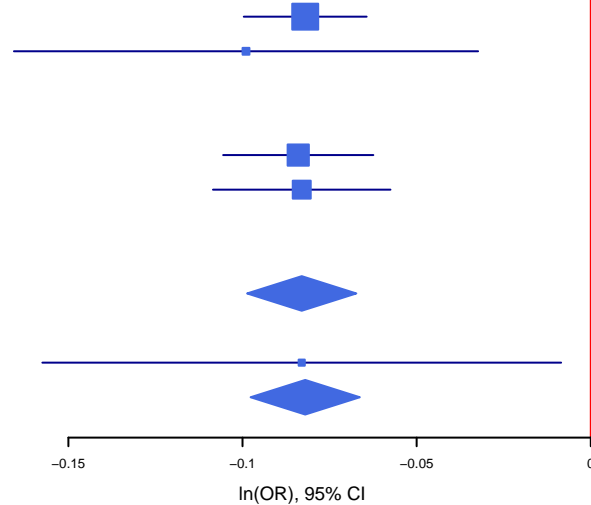

|                                                    |            |             |                 |                     |                      |               |               |     |  |
|----------------------------------------------------|------------|-------------|-----------------|---------------------|----------------------|---------------|---------------|-----|--|
| <b>rs2102949</b>                                   |            |             | <b>G/A</b>      |                     | <b>12:123676763</b>  |               |               |     |  |
|                                                    |            |             | --              |                     | het_P:               | 0.576         | het_I:        | 0.0 |  |
|                                                    | <b>ngt</b> | <b>info</b> | <b>p_value</b>  | <b>f_ca(n)</b>      | <b>f_co(n)</b>       | <b>ln(OR)</b> | <b>STDerr</b> |     |  |
| PGC_SCZ wave3 eur only                             | 0          | 1.00        | 5.65e-14        | 0.269(53386)        | 0.253(77258)         | 0.074         | 0.01          |     |  |
| PGC_SCZ wave3 asn only                             | 0          | 1.00        | 2.27e-12        | 0.313(14004)        | 0.288(16757)         | 0.13          | 0.018         |     |  |
| PGC_SCZ wave2 only                                 | 0          | 1.00        | 4.43e-11        | 0.273(34850)        | 0.255(44347)         | 0.081         | 0.012         |     |  |
| PGC_SCZ wave3 (excl. wave2)                        | 0          | 1.00        | 9.6e-14         | 0.283(32540)        | 0.263(49668)         | 0.091         | 0.012         |     |  |
| <b>PGC_SCZ wave3 (incl. wave2)</b>                 | <b>0</b>   | <b>1.00</b> | <b>3.18e-23</b> | <b>0.278(67390)</b> | <b>0.259(94015)</b>  | <b>0.086</b>  | <b>0.009</b>  |     |  |
| Decode – Replication                               | 0          | 1.00        | 0.235           | 0.286(1979)         | 0.274(142627)        | 0.091         | 0.042         |     |  |
| <b>PGC_SCZ wave3 (incl. wave2 and replication)</b> | <b>0</b>   | <b>1.00</b> | <b>3.34e-23</b> | <b>0.278(69369)</b> | <b>0.268(236642)</b> | <b>0.085</b>  | <b>0.008</b>  |     |  |

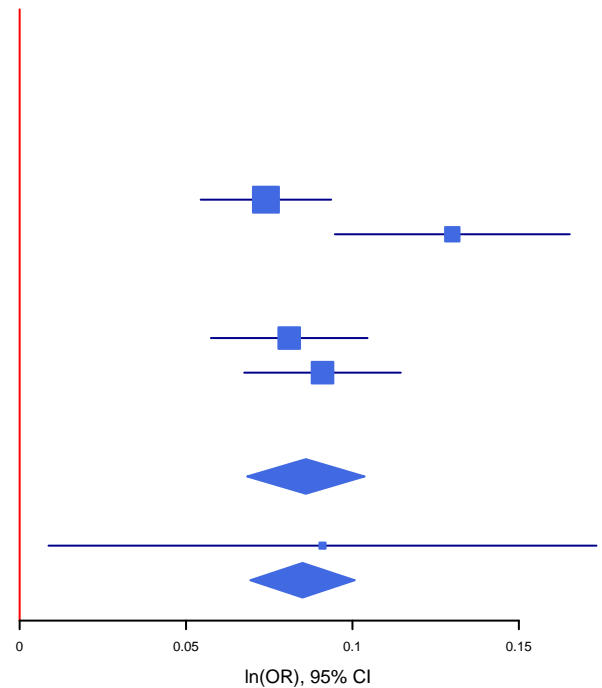

rs13107325

|     |                        |
|-----|------------------------|
| C/T | 4:103188709            |
| ++  | het_P: 0.36 het_I: 0.0 |

|                        | ngt | info | p_value | f_ca(n)      | f_co(n)      | ln(OR) | STDerr |
|------------------------|-----|------|---------|--------------|--------------|--------|--------|
| PGC_SCZ wave3 eur only | 66  | 0.98 | 2.9e-21 | 0.919(53200) | 0.933(76329) | -0.159 | 0.017  |
| PGC_SCZ wave3 asn only | nan | nan  | nan     | nan(nan)     | nan(nan)     | nan    | nan    |

|                             |    |      |          |              |              |        |       |
|-----------------------------|----|------|----------|--------------|--------------|--------|-------|
| PGC_SCZ wave2 only          | 28 | 0.96 | 4.89e-15 | 0.921(32812) | 0.934(42458) | -0.172 | 0.022 |
| PGC_SCZ wave3 (excl. wave2) | 38 | 1.00 | 6.72e-08 | 0.917(20388) | 0.933(33871) | -0.141 | 0.026 |

PGC\_SCZ wave3 (incl. wave2) 66 0.98 2.9e-21 0.919(53200) 0.933(76329) -0.159 0.017

Decode – Replication 0 1.00 0.000832 0.947(1979) 0.983(142627) -0.141 0.094

PGC\_SCZ wave3 (incl. wave2 and replication) 66 0.99 4.67e-23 0.92(55179) 0.966(218956) -0.163 0.016

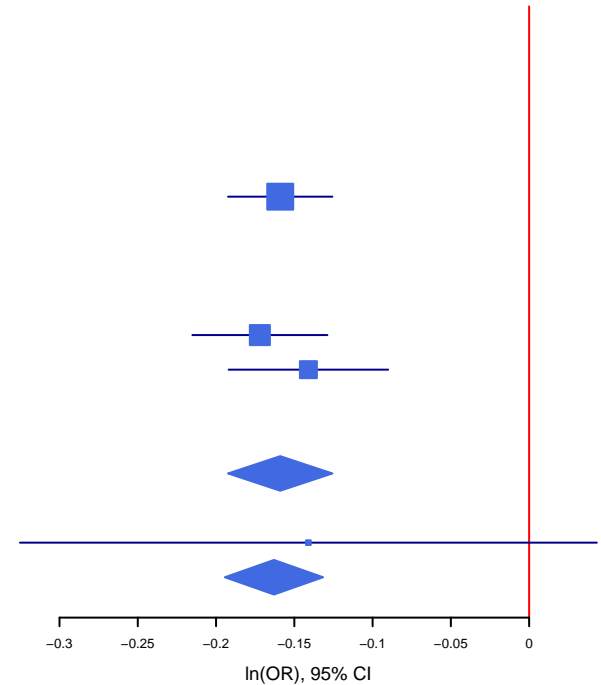

| <b>rs1198588</b>                                   | <b>A/T</b> |             | <b>1:98552832</b> |                     |                      |               |             |
|----------------------------------------------------|------------|-------------|-------------------|---------------------|----------------------|---------------|-------------|
|                                                    | —          |             | het_P:            | 0.161               | het_I:               | 49.1          |             |
|                                                    | ngt        | info        | p_value           | f_ca(n)             | f_co(n)              | ln(OR)        | STDerr      |
| PGC_SCZ wave3 eur only                             | 25         | 1.00        | 1.73e-21          | 0.194(53386)        | 0.212(77258)         | -0.103        | 0.011       |
| PGC_SCZ wave3 asn only                             | 4          | 0.98        | 0.372             | 0.064(14004)        | 0.066(16757)         | -0.031        | 0.035       |
| PGC_SCZ wave2 only                                 | 19         | 1.00        | 1.48e-15          | 0.188(34850)        | 0.21(44347)          | -0.109        | 0.014       |
| PGC_SCZ wave3 (excl. wave2)                        | 10         | 0.99        | 3.49e-07          | 0.144(32540)        | 0.164(49668)         | -0.08         | 0.016       |
| <b>PGC_SCZ wave3 (incl. wave2)</b>                 | <b>29</b>  | <b>0.99</b> | <b>7.88e-21</b>   | <b>0.167(67390)</b> | <b>0.186(94015)</b>  | <b>-0.096</b> | <b>0.01</b> |
| Decode – Replication                               | 0          | 1.00        | 0.0122            | 0.24(1979)          | 0.232(142627)        | -0.08         | 0.045       |
| <b>PGC_SCZ wave3 (incl. wave2 and replication)</b> | <b>29</b>  | <b>1.00</b> | <b>3.6e-22</b>    | <b>0.169(69369)</b> | <b>0.214(236642)</b> | <b>-0.097</b> | <b>0.01</b> |

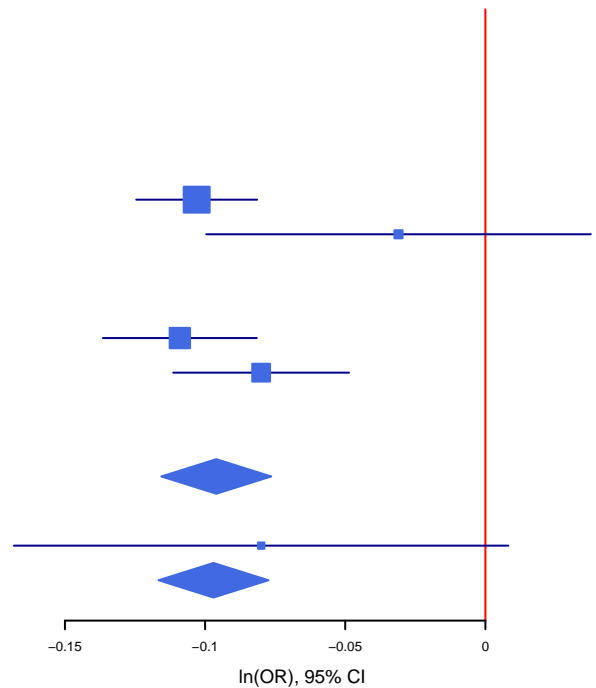



| rs2717003                                          | A/G      |             | 2:58143438      |                     |                      |               |              |
|----------------------------------------------------|----------|-------------|-----------------|---------------------|----------------------|---------------|--------------|
|                                                    | —        |             | het_P:          | 0.336               | het_I:               | 0.0           |              |
|                                                    | ngt      | info        | p_value         | f_ca(n)             | f_co(n)              | ln(OR)        | STDerr       |
| PGC_SCZ wave3 eur only                             | 0        | 1.00        | 4.26e−15        | 0.385(53386)        | 0.401(77258)         | −0.069        | 0.009        |
| PGC_SCZ wave3 asn only                             | 0        | 0.99        | 2.83e−08        | 0.298(14004)        | 0.322(16757)         | −0.103        | 0.018        |
| PGC_SCZ wave2 only                                 | 0        | 1.00        | 9.73e−10        | 0.382(34850)        | 0.4(44347)           | −0.068        | 0.011        |
| PGC_SCZ wave3 (excl. wave2)                        | 0        | 1.00        | 2.93e−13        | 0.351(32540)        | 0.376(49668)         | −0.083        | 0.011        |
| <b>PGC_SCZ wave3 (incl. wave2)</b>                 | <b>0</b> | <b>1.00</b> | <b>2.76e−21</b> | <b>0.367(67390)</b> | <b>0.387(94015)</b>  | <b>−0.075</b> | <b>0.008</b> |
| Decode – Replication                               | 0        | 1.00        | 0.149           | 0.408(1979)         | 0.378(142627)        | −0.083        | 0.039        |
| <b>PGC_SCZ wave3 (incl. wave2 and replication)</b> | <b>0</b> | <b>1.00</b> | <b>1.91e−21</b> | <b>0.368(69369)</b> | <b>0.382(236642)</b> | <b>−0.074</b> | <b>0.008</b> |

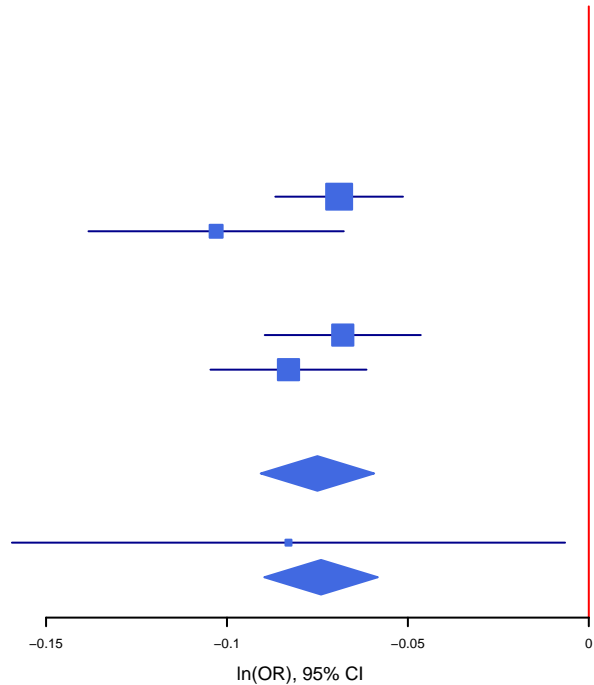

| rs13262595                                         | A/G      |             | 8:143316970     |                     |                     |              |              |
|----------------------------------------------------|----------|-------------|-----------------|---------------------|---------------------|--------------|--------------|
|                                                    | ++       |             | het_P:          | 0.143               | het_I:              | 53.4         |              |
|                                                    | ngt      | info        | p_value         | f_ca(n)             | f_co(n)             | ln(OR)       | STDerr       |
| PGC_SCZ wave3 eur only                             | 1        | 0.99        | 7.06e-18        | 0.456(53386)        | 0.438(77258)        | 0.075        | 0.009        |
| PGC_SCZ wave3 asn only                             | 0        | 0.95        | 0.0295          | 0.289(14004)        | 0.281(16757)        | 0.042        | 0.019        |
| PGC_SCZ wave2 only                                 | 1        | 0.99        | 2.44e-13        | 0.447(34850)        | 0.433(44347)        | 0.08         | 0.011        |
| PGC_SCZ wave3 (excl. wave2)                        | 0        | 0.98        | 5.64e-07        | 0.395(32540)        | 0.39(49668)         | 0.057        | 0.011        |
| <b>PGC_SCZ wave3 (incl. wave2)</b>                 | <b>1</b> | <b>0.98</b> | <b>2.21e-18</b> | <b>0.421(67390)</b> | <b>0.41(94015)</b>  | <b>0.069</b> | <b>0.008</b> |
| Decode – Replication                               | 0        | 1.00        | 4.41e-05        | 0.435(1979)         | 0.477(142627)       | 0.057        | 0.038        |
| <b>PGC_SCZ wave3 (incl. wave2 and replication)</b> | <b>1</b> | <b>0.99</b> | <b>5.67e-21</b> | <b>0.421(69369)</b> | <b>0.45(236642)</b> | <b>0.073</b> | <b>0.008</b> |

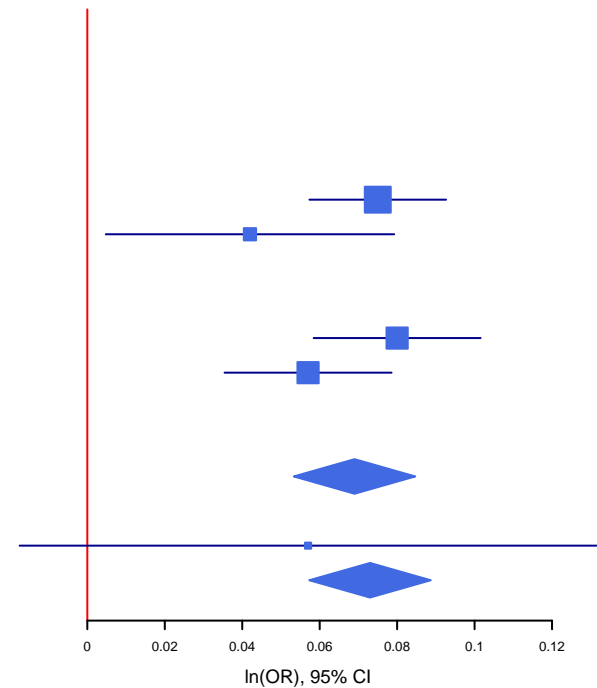

|                                                    |           |             |                 |                     |                      |              |              |
|----------------------------------------------------|-----------|-------------|-----------------|---------------------|----------------------|--------------|--------------|
| rs2710323                                          | T/C       |             | 3:52815905      |                     |                      |              |              |
|                                                    | ++        |             | het_P:          | 0.514               | het_I:               | 0.0          |              |
|                                                    | ngt       | info        | p_value         | f_ca(n)             | f_co(n)              | ln(OR)       | STDerr       |
| PGC_SCZ wave3 eur only                             | 24        | 0.99        | 1.23e-19        | 0.531(53386)        | 0.51(77258)          | 0.078        | 0.009        |
| PGC_SCZ wave3 asn only                             | 2         | 0.99        | 0.000686        | 0.594(14004)        | 0.588(16757)         | 0.059        | 0.017        |
| PGC_SCZ wave2 only                                 | 16        | 0.99        | 1.65e-10        | 0.532(34850)        | 0.513(44347)         | 0.07         | 0.011        |
| PGC_SCZ wave3 (excl. wave2)                        | 10        | 0.99        | 4.66e-13        | 0.558(32540)        | 0.534(49668)         | 0.08         | 0.011        |
| <b>PGC_SCZ wave3 (incl. wave2)</b>                 | <b>26</b> | <b>0.99</b> | <b>5.92e-22</b> | <b>0.545(67390)</b> | <b>0.524(94015)</b>  | <b>0.075</b> | <b>0.008</b> |
| Decode – Replication                               | 0         | 1.00        | 0.579           | 0.504(1979)         | 0.52(142627)         | 0.08         | 0.038        |
| <b>PGC_SCZ wave3 (incl. wave2 and replication)</b> | <b>26</b> | <b>1.00</b> | <b>6.55e-21</b> | <b>0.544(69369)</b> | <b>0.521(236642)</b> | <b>0.071</b> | <b>0.008</b> |

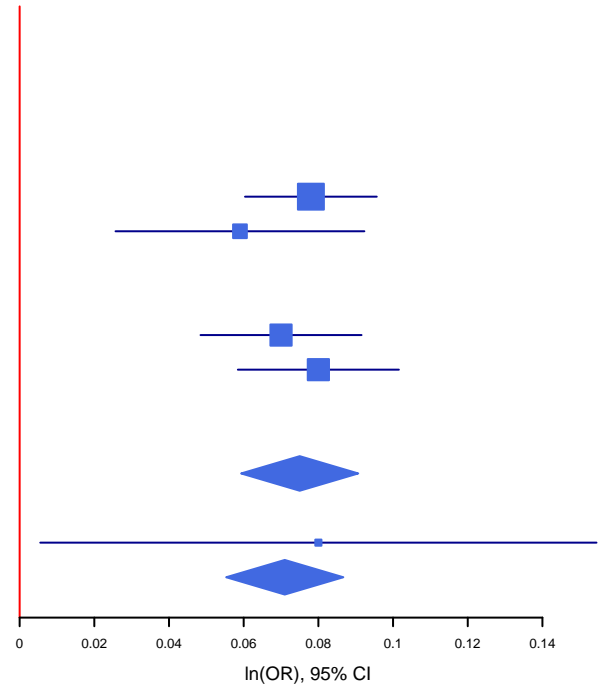

rs13230189

C/T

7:137073259

—

het\_P:

0.123

het\_I:

58.0

|  | ngt | info | p_value | f_ca(n) | f_co(n) | ln(OR) | STDerr |
|--|-----|------|---------|---------|---------|--------|--------|
|--|-----|------|---------|---------|---------|--------|--------|

PGC\_SCZ wave3 eur only

|    |      |          |              |              |       |       |
|----|------|----------|--------------|--------------|-------|-------|
| 27 | 1.00 | 1.81e-13 | 0.661(53386) | 0.645(77258) | 0.067 | 0.009 |
|----|------|----------|--------------|--------------|-------|-------|

PGC\_SCZ wave3 asn only

|   |      |          |              |             |       |       |
|---|------|----------|--------------|-------------|-------|-------|
| 5 | 0.97 | 4.14e-07 | 0.701(14004) | 0.68(16757) | 0.095 | 0.019 |
|---|------|----------|--------------|-------------|-------|-------|

PGC\_SCZ wave2 only

|    |      |          |             |              |      |       |
|----|------|----------|-------------|--------------|------|-------|
| 23 | 1.00 | 1.49e-07 | 0.66(34850) | 0.644(44347) | 0.06 | 0.011 |
|----|------|----------|-------------|--------------|------|-------|

PGC\_SCZ wave3 (excl. wave2)

|   |      |          |              |              |       |       |
|---|------|----------|--------------|--------------|-------|-------|
| 9 | 0.98 | 3.74e-13 | 0.679(32540) | 0.658(49668) | 0.085 | 0.012 |
|---|------|----------|--------------|--------------|-------|-------|

PGC\_SCZ wave3 (incl. wave2)

|    |      |          |              |              |       |       |
|----|------|----------|--------------|--------------|-------|-------|
| 32 | 0.99 | 1.04e-18 | 0.669(67390) | 0.651(94015) | 0.072 | 0.008 |
|----|------|----------|--------------|--------------|-------|-------|

Decode – Replication

|   |      |       |             |               |       |       |
|---|------|-------|-------------|---------------|-------|-------|
| 0 | 1.00 | 0.125 | 0.681(1979) | 0.673(142627) | 0.085 | 0.041 |
|---|------|-------|-------------|---------------|-------|-------|

PGC\_SCZ wave3 (incl. wave2 and replication)

|    |      |          |              |               |       |       |
|----|------|----------|--------------|---------------|-------|-------|
| 32 | 1.00 | 2.14e-19 | 0.669(69369) | 0.664(236642) | 0.072 | 0.008 |
|----|------|----------|--------------|---------------|-------|-------|

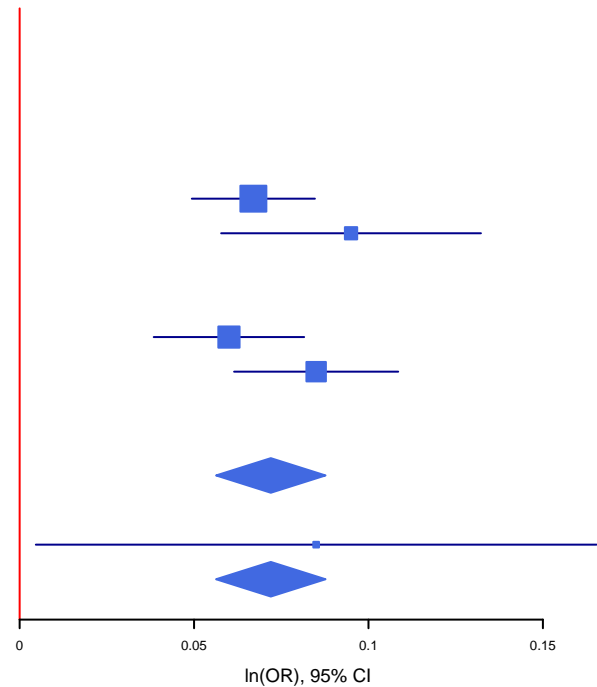

rs12129573

C/A  
++  
1:73768366  
het\_P: 0.429 het\_I: 0.0

|                                                    | ngt      | info        | p_value         | f_ca(n)             | f_co(n)             | ln(OR)        | STDerr       |
|----------------------------------------------------|----------|-------------|-----------------|---------------------|---------------------|---------------|--------------|
| PGC_SCZ wave3 eur only                             | 7        | 1.00        | 2.28e-18        | 0.616(53386)        | 0.634(77258)        | -0.078        | 0.009        |
| PGC_SCZ wave3 asn only                             | 1        | 0.93        | 0.657           | 0.795(14004)        | 0.796(16757)        | -0.01         | 0.022        |
| PGC_SCZ wave2 only                                 | 0        | 0.99        | 4.65e-11        | 0.626(34850)        | 0.636(44347)        | -0.074        | 0.011        |
| PGC_SCZ wave3 (excl. wave2)                        | 8        | 0.98        | 4.21e-07        | 0.682(32540)        | 0.688(49668)        | -0.061        | 0.012        |
| <b>PGC_SCZ wave3 (incl. wave2)</b>                 | <b>8</b> | <b>0.98</b> | <b>1.42e-16</b> | <b>0.653(67390)</b> | <b>0.663(94015)</b> | <b>-0.068</b> | <b>0.008</b> |
| Decode - Replication                               | 0        | 1.00        | 0.000353        | 0.614(1979)         | 0.641(142627)       | -0.061        | 0.039        |
| <b>PGC_SCZ wave3 (incl. wave2 and replication)</b> | <b>8</b> | <b>0.99</b> | <b>7.97e-19</b> | <b>0.652(69369)</b> | <b>0.65(236642)</b> | <b>-0.071</b> | <b>0.008</b> |

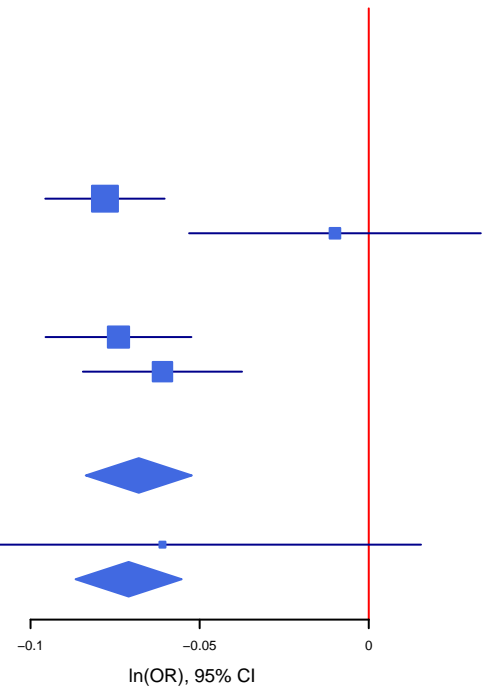

|                                                    |          |             |                 |                     |                      |              |              |
|----------------------------------------------------|----------|-------------|-----------------|---------------------|----------------------|--------------|--------------|
| rs2190864                                          | T/C      |             | 14:72416219     |                     |                      |              |              |
|                                                    | ++       |             | het_P:          |                     | 0.165                | het_I:       | 48.1         |
|                                                    | ngt      | info        | p_value         | f_ca(n)             | f_co(n)              | ln(OR)       | STDerr       |
| PGC_SCZ wave3 eur only                             | 7        | 1.00        | 1.17e-13        | 0.425(53386)        | 0.412(77258)         | 0.065        | 0.009        |
| PGC_SCZ wave3 asn only                             | 0        | 0.97        | 0.000199        | 0.265(14004)        | 0.251(16757)         | 0.073        | 0.02         |
| PGC_SCZ wave2 only                                 | 1        | 1.00        | 4.52e-07        | 0.421(34850)        | 0.412(44347)         | 0.056        | 0.011        |
| PGC_SCZ wave3 (excl. wave2)                        | 6        | 0.99        | 1.75e-11        | 0.361(32540)        | 0.358(49668)         | 0.078        | 0.012        |
| <b>PGC_SCZ wave3 (incl. wave2)</b>                 | <b>7</b> | <b>1.00</b> | <b>1.12e-16</b> | <b>0.392(67390)</b> | <b>0.383(94015)</b>  | <b>0.066</b> | <b>0.008</b> |
| Decode – Replication                               | 0        | 1.00        | 0.00109         | 0.406(1979)         | 0.414(142627)        | 0.078        | 0.038        |
| <b>PGC_SCZ wave3 (incl. wave2 and replication)</b> | <b>7</b> | <b>1.00</b> | <b>2.01e-18</b> | <b>0.392(69369)</b> | <b>0.402(236642)</b> | <b>0.069</b> | <b>0.008</b> |

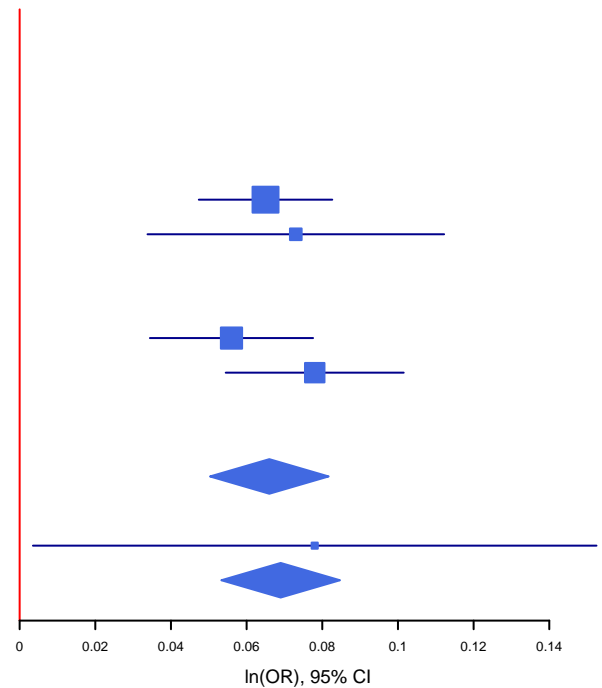

rs778371

A/G

2:233743109

—

het\_P:

0.605

het\_I:

0.0

|  | ngt | info | p_value | f_ca(n) | f_co(n) | ln(OR) | STDerr |
|--|-----|------|---------|---------|---------|--------|--------|
|--|-----|------|---------|---------|---------|--------|--------|

PGC\_SCZ wave3 eur only

|   |      |          |              |              |        |      |
|---|------|----------|--------------|--------------|--------|------|
| 7 | 0.99 | 1.49e-17 | 0.699(53386) | 0.714(77258) | -0.081 | 0.01 |
|---|------|----------|--------------|--------------|--------|------|

PGC\_SCZ wave3 asn only

|   |      |       |              |              |       |       |
|---|------|-------|--------------|--------------|-------|-------|
| 0 | 0.95 | 0.469 | 0.884(14004) | 0.886(16757) | -0.02 | 0.027 |
|---|------|-------|--------------|--------------|-------|-------|

PGC\_SCZ wave2 only

|   |      |          |              |              |        |       |
|---|------|----------|--------------|--------------|--------|-------|
| 0 | 1.00 | 6.38e-11 | 0.707(34850) | 0.715(44347) | -0.078 | 0.012 |
|---|------|----------|--------------|--------------|--------|-------|

PGC\_SCZ wave3 (excl. wave2)

|   |      |          |              |              |        |       |
|---|------|----------|--------------|--------------|--------|-------|
| 7 | 0.98 | 2.86e-07 | 0.771(32540) | 0.772(49668) | -0.069 | 0.013 |
|---|------|----------|--------------|--------------|--------|-------|

**PGC\_SCZ wave3 (incl. wave2)**

|          |             |                |                     |                     |               |              |
|----------|-------------|----------------|---------------------|---------------------|---------------|--------------|
| <b>7</b> | <b>0.99</b> | <b>1.1e-16</b> | <b>0.738(67390)</b> | <b>0.745(94015)</b> | <b>-0.074</b> | <b>0.009</b> |
|----------|-------------|----------------|---------------------|---------------------|---------------|--------------|

Decode – Replication

|   |      |         |             |              |        |       |
|---|------|---------|-------------|--------------|--------|-------|
| 0 | 1.00 | 0.00949 | 0.716(1979) | 0.71(142627) | -0.069 | 0.041 |
|---|------|---------|-------------|--------------|--------|-------|

**PGC\_SCZ wave3 (incl. wave2 and replication)**

|          |             |                 |                     |                      |               |              |
|----------|-------------|-----------------|---------------------|----------------------|---------------|--------------|
| <b>7</b> | <b>0.99</b> | <b>3.76e-18</b> | <b>0.737(69369)</b> | <b>0.724(236642)</b> | <b>-0.076</b> | <b>0.009</b> |
|----------|-------------|-----------------|---------------------|----------------------|---------------|--------------|

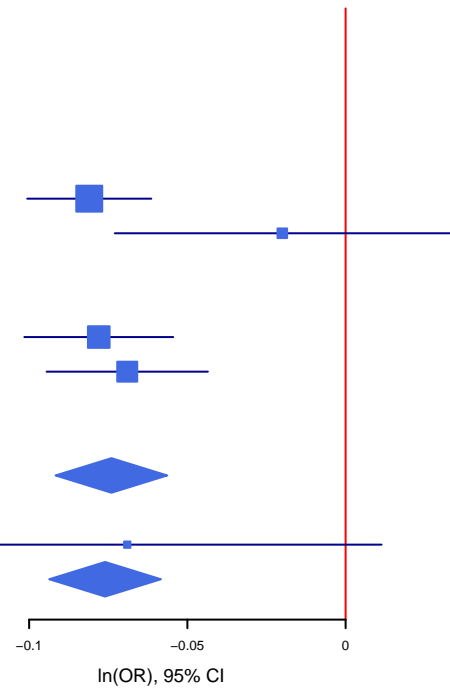

|                                                    |           |             |                 |                     |                      |              |             |
|----------------------------------------------------|-----------|-------------|-----------------|---------------------|----------------------|--------------|-------------|
| rs7647398                                          | C/T       |             | 3:180733150     |                     |                      |              |             |
|                                                    | --        |             | het_P:          |                     | 0.113                | het_I:       | 60.1        |
|                                                    | ngt       | info        | p_value         | f_ca(n)             | f_co(n)              | ln(OR)       | STDerr      |
| PGC_SCZ wave3 eur only                             | 17        | 1.00        | 1.07e-12        | 0.811(53386)        | 0.8(77258)           | 0.077        | 0.011       |
| PGC_SCZ wave3 asn only                             | 2         | 0.98        | 7.84e-07        | 0.872(14004)        | 0.856(16757)         | 0.127        | 0.026       |
| PGC_SCZ wave2 only                                 | 16        | 1.00        | 4.88e-07        | 0.817(34850)        | 0.804(44347)         | 0.07         | 0.014       |
| PGC_SCZ wave3 (excl. wave2)                        | 3         | 1.00        | 2.36e-12        | 0.832(32540)        | 0.816(49668)         | 0.102        | 0.014       |
| <b>PGC_SCZ wave3 (incl. wave2)</b>                 | <b>19</b> | <b>1.00</b> | <b>2.21e-17</b> | <b>0.824(67390)</b> | <b>0.81(94015)</b>   | <b>0.085</b> | <b>0.01</b> |
| Decode – Replication                               | 0         | 1.00        | 0.23            | 0.796(1979)         | 0.799(142627)        | 0.102        | 0.048       |
| <b>PGC_SCZ wave3 (incl. wave2 and replication)</b> | <b>19</b> | <b>1.00</b> | <b>1.07e-17</b> | <b>0.823(69369)</b> | <b>0.804(236642)</b> | <b>0.084</b> | <b>0.01</b> |

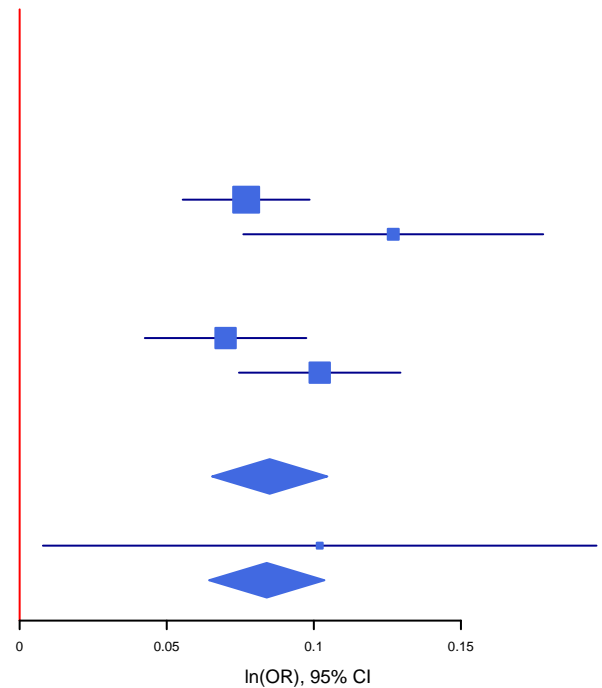



rs7701440

|     |                          |
|-----|--------------------------|
| T/C | 5:60620980               |
| --- | het_P: 0.071 het_I: 69.3 |

|                                             | ngt | info | p_value  | f_ca(n)      | f_co(n)       | ln(OR) | STDerr |
|---------------------------------------------|-----|------|----------|--------------|---------------|--------|--------|
| PGC_SCZ wave3 eur only                      | 25  | 0.99 | 7e-16    | 0.497(53386) | 0.515(77258)  | -0.07  | 0.009  |
| PGC_SCZ wave3 asn only                      | 4   | 0.93 | 0.218    | 0.784(14004) | 0.789(16757)  | -0.027 | 0.022  |
| PGC_SCZ wave2 only                          | 19  | 0.99 | 1.74e-12 | 0.513(34850) | 0.524(44347)  | -0.077 | 0.011  |
| PGC_SCZ wave3 (excl. wave2)                 | 10  | 0.97 | 4.35e-05 | 0.603(32540) | 0.599(49668)  | -0.048 | 0.012  |
| PGC_SCZ wave3 (incl. wave2)                 | 29  | 0.98 | 1.86e-15 | 0.557(67390) | 0.564(94015)  | -0.064 | 0.008  |
| Decode - Replication                        | 0   | 1.00 | 0.000579 | 0.529(1979)  | 0.532(142627) | -0.048 | 0.038  |
| PGC_SCZ wave3 (incl. wave2 and replication) | 29  | 0.99 | 1.7e-17  | 0.556(69369) | 0.545(236642) | -0.067 | 0.008  |

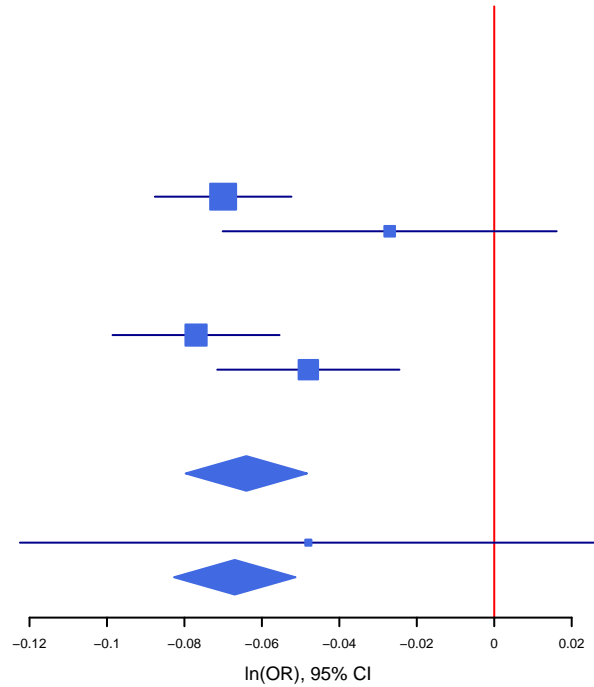

rs4766428                      C/T                      12:110723245  
                                 ++                      het\_P:                      0.879                      het\_I:                      0.0

|                                                    | ngt       | info        | p_value         | f_ca(n)             | f_co(n)              | ln(OR)        | STDerr       |
|----------------------------------------------------|-----------|-------------|-----------------|---------------------|----------------------|---------------|--------------|
| PGC_SCZ wave3 eur only                             | 33        | 0.94        | 3.93e-17        | 0.539(53386)        | 0.559(77258)         | -0.075        | 0.009        |
| PGC_SCZ wave3 asn only                             | 3         | 0.72        | 0.157           | 0.136(14004)        | 0.147(16757)         | -0.041        | 0.029        |
| PGC_SCZ wave2 only                                 | 3         | 0.93        | 4.63e-10        | 0.518(34850)        | 0.548(44347)         | -0.071        | 0.011        |
| PGC_SCZ wave3 (excl. wave2)                        | 33        | 0.87        | 1.01e-08        | 0.388(32540)        | 0.43(49668)          | -0.074        | 0.013        |
| <b>PGC_SCZ wave3 (incl. wave2)</b>                 | <b>36</b> | <b>0.90</b> | <b>2.61e-17</b> | <b>0.456(67390)</b> | <b>0.486(94015)</b>  | <b>-0.072</b> | <b>0.008</b> |
| Decode – Replication                               | 0         | 1.00        | 0.497           | 0.539(1979)         | 0.553(142627)        | -0.074        | 0.038        |
| <b>PGC_SCZ wave3 (incl. wave2 and replication)</b> | <b>36</b> | <b>0.96</b> | <b>3.58e-17</b> | <b>0.458(69369)</b> | <b>0.526(236642)</b> | <b>-0.07</b>  | <b>0.008</b> |

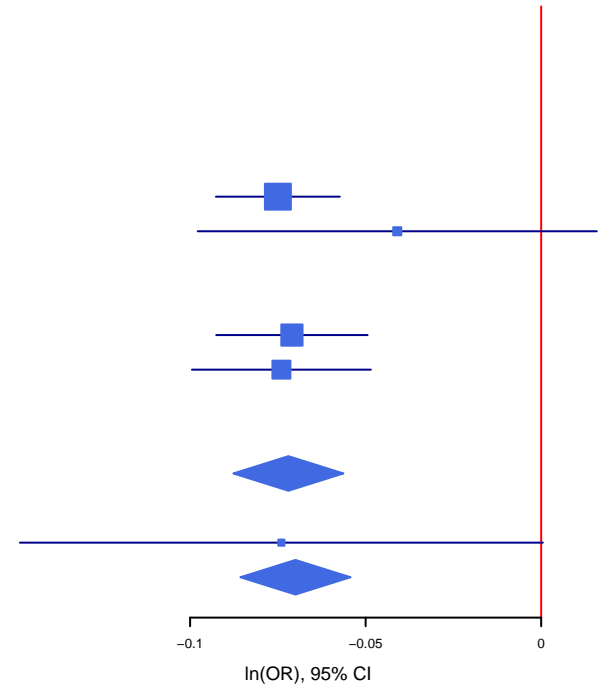

rs72980087

G/A

18:77632194

++

het\_P:

0.005

het\_I:

87.5

|  | ngt | info | p_value | f_ca(n) | f_co(n) | ln(OR) | STDerr |
|--|-----|------|---------|---------|---------|--------|--------|
|--|-----|------|---------|---------|---------|--------|--------|

|                        |   |      |          |              |              |        |       |
|------------------------|---|------|----------|--------------|--------------|--------|-------|
| PGC_SCZ wave3 eur only | 0 | 0.99 | 8.62e-11 | 0.628(53386) | 0.638(77258) | -0.058 | 0.009 |
|------------------------|---|------|----------|--------------|--------------|--------|-------|

|                        |   |      |         |              |              |        |       |
|------------------------|---|------|---------|--------------|--------------|--------|-------|
| PGC_SCZ wave3 asn only | 0 | 1.00 | 2.7e-07 | 0.531(14004) | 0.554(16757) | -0.087 | 0.017 |
|------------------------|---|------|---------|--------------|--------------|--------|-------|

|                    |   |      |          |              |             |        |       |
|--------------------|---|------|----------|--------------|-------------|--------|-------|
| PGC_SCZ wave2 only | 0 | 0.99 | 0.000217 | 0.626(34850) | 0.64(44347) | -0.042 | 0.011 |
|--------------------|---|------|----------|--------------|-------------|--------|-------|

|                             |   |      |          |              |              |        |       |
|-----------------------------|---|------|----------|--------------|--------------|--------|-------|
| PGC_SCZ wave3 (excl. wave2) | 0 | 0.99 | 7.27e-15 | 0.587(32540) | 0.609(49668) | -0.086 | 0.011 |
|-----------------------------|---|------|----------|--------------|--------------|--------|-------|

|                                    |          |             |                 |                     |                     |               |              |
|------------------------------------|----------|-------------|-----------------|---------------------|---------------------|---------------|--------------|
| <b>PGC_SCZ wave3 (incl. wave2)</b> | <b>0</b> | <b>0.99</b> | <b>4.06e-16</b> | <b>0.607(67390)</b> | <b>0.623(94015)</b> | <b>-0.064</b> | <b>0.008</b> |
|------------------------------------|----------|-------------|-----------------|---------------------|---------------------|---------------|--------------|

|                      |   |      |       |             |               |        |      |
|----------------------|---|------|-------|-------------|---------------|--------|------|
| Decode - Replication | 0 | 1.00 | 0.115 | 0.639(1979) | 0.617(142627) | -0.086 | 0.04 |
|----------------------|---|------|-------|-------------|---------------|--------|------|

|                                                    |          |             |                 |                     |                      |               |              |
|----------------------------------------------------|----------|-------------|-----------------|---------------------|----------------------|---------------|--------------|
| <b>PGC_SCZ wave3 (incl. wave2 and replication)</b> | <b>0</b> | <b>1.00</b> | <b>1.01e-16</b> | <b>0.608(69369)</b> | <b>0.619(236642)</b> | <b>-0.064</b> | <b>0.008</b> |
|----------------------------------------------------|----------|-------------|-----------------|---------------------|----------------------|---------------|--------------|

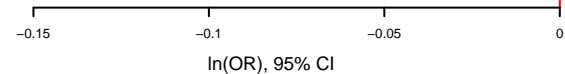

rs12285419

|     |                             |
|-----|-----------------------------|
| C/A | 11:46343189                 |
| ++  | het_P: 0.135    het_I: 55.2 |

|                                             | ngt | info | p_value  | f_ca(n)      | f_co(n)       | ln(OR) | STDerr |
|---------------------------------------------|-----|------|----------|--------------|---------------|--------|--------|
| PGC_SCZ wave3 eur only                      | 0   | 0.98 | 1.05e-14 | 0.8(53386)   | 0.812(77258)  | -0.085 | 0.011  |
| PGC_SCZ wave3 asn only                      | 0   | 0.96 | 0.00732  | 0.841(14004) | 0.849(16757)  | -0.064 | 0.024  |
| PGC_SCZ wave2 only                          | 0   | 0.98 | 5.82e-12 | 0.801(34850) | 0.815(44347)  | -0.096 | 0.014  |
| PGC_SCZ wave3 (excl. wave2)                 | 0   | 0.98 | 4.12e-06 | 0.816(32540) | 0.822(49668)  | -0.066 | 0.014  |
| PGC_SCZ wave3 (incl. wave2)                 | 0   | 0.98 | 3.73e-16 | 0.809(67390) | 0.818(94015)  | -0.081 | 0.01   |
| Decode - Replication                        | 0   | 1.00 | 0.0885   | 0.817(1979)  | 0.811(142627) | -0.066 | 0.048  |
| PGC_SCZ wave3 (incl. wave2 and replication) | 0   | 0.99 | 1.07e-16 | 0.809(69369) | 0.814(236642) | -0.081 | 0.01   |

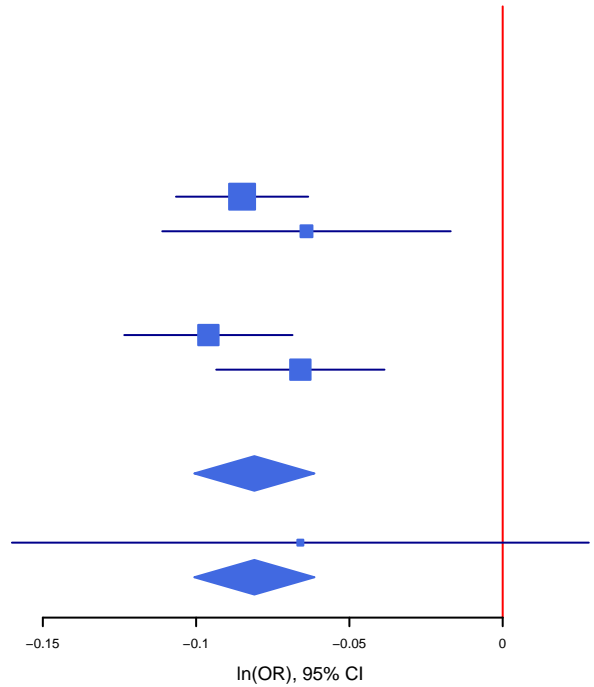

| rs2514218                                          | C/T       |             | 11:113392994    |                     |                      |              |              |
|----------------------------------------------------|-----------|-------------|-----------------|---------------------|----------------------|--------------|--------------|
|                                                    | --        |             | het_P:          |                     | 0.843                | het_I:       | 0.0          |
|                                                    | ngt       | info        | p_value         | f_ca(n)             | f_co(n)              | ln(OR)       | STDerr       |
| PGC_SCZ wave3 eur only                             | 40        | 0.99        | 1.35e-14        | 0.668(53386)        | 0.656(77258)         | 0.07         | 0.009        |
| PGC_SCZ wave3 asn only                             | 7         | 0.87        | 0.213           | 0.951(14004)        | 0.951(16757)         | 0.056        | 0.045        |
| PGC_SCZ wave2 only                                 | 30        | 0.99        | 1.4e-09         | 0.691(34850)        | 0.671(44347)         | 0.071        | 0.012        |
| PGC_SCZ wave3 (excl. wave2)                        | 17        | 0.95        | 9.04e-07        | 0.765(32540)        | 0.742(49668)         | 0.068        | 0.014        |
| <b>PGC_SCZ wave3 (incl. wave2)</b>                 | <b>47</b> | <b>0.97</b> | <b>6.46e-15</b> | <b>0.727(67390)</b> | <b>0.709(94015)</b>  | <b>0.07</b>  | <b>0.009</b> |
| Decode - Replication                               | 0         | 1.00        | 0.00166         | 0.62(1979)          | 0.652(142627)        | 0.068        | 0.04         |
| <b>PGC_SCZ wave3 (incl. wave2 and replication)</b> | <b>47</b> | <b>0.99</b> | <b>1.37e-16</b> | <b>0.724(69369)</b> | <b>0.674(236642)</b> | <b>0.073</b> | <b>0.009</b> |

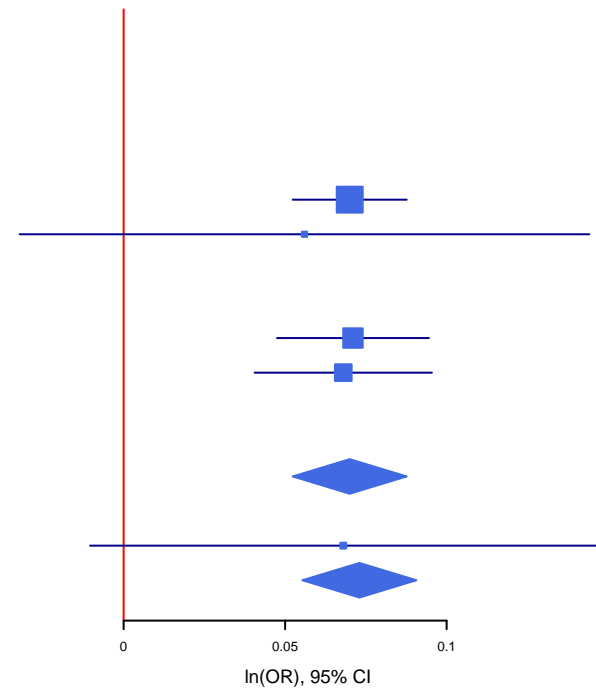

| <b>rs1658810</b>                                   |          |             | <b>C/T</b>      |                     | <b>2:200816382</b>   |              |              |
|----------------------------------------------------|----------|-------------|-----------------|---------------------|----------------------|--------------|--------------|
|                                                    |          |             | --              |                     | het_P:               | 0.122        | het_I: 58.1  |
|                                                    | ngt      | info        | p_value         | f_ca(n)             | f_co(n)              | ln(OR)       | STDerr       |
| PGC_SCZ wave3 eur only                             | 0        | 0.99        | 6.51e-14        | 0.197(53386)        | 0.185(77258)         | 0.082        | 0.011        |
| PGC_SCZ wave3 asn only                             | 0        | 1.00        | 0.000114        | 0.262(14004)        | 0.245(16757)         | 0.076        | 0.02         |
| PGC_SCZ wave2 only                                 | 0        | 1.00        | 2.46e-12        | 0.204(34850)        | 0.189(44347)         | 0.096        | 0.014        |
| PGC_SCZ wave3 (excl. wave2)                        | 0        | 0.99        | 8.13e-07        | 0.218(32540)        | 0.203(49668)         | 0.066        | 0.013        |
| <b>PGC_SCZ wave3 (incl. wave2)</b>                 | <b>0</b> | <b>1.00</b> | <b>3.54e-17</b> | <b>0.211(67390)</b> | <b>0.196(94015)</b>  | <b>0.081</b> | <b>0.01</b>  |
| Decode – Replication                               | 0        | 1.00        | 0.956           | 0.171(1979)         | 0.175(142627)        | 0.066        | 0.05         |
| <b>PGC_SCZ wave3 (incl. wave2 and replication)</b> | <b>0</b> | <b>1.00</b> | <b>1.39e-16</b> | <b>0.21(69369)</b>  | <b>0.183(236642)</b> | <b>0.078</b> | <b>0.009</b> |

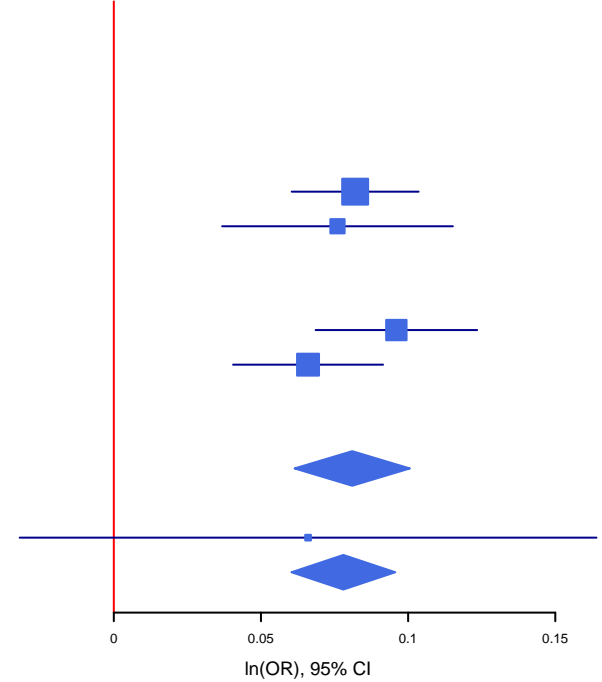

rs11210892

G/A

1:44100084

---

het\_P:

0.459

het\_I:

0.0

|  | ngt | info | p_value | f_ca(n) | f_co(n) | ln(OR) | STDerr |
|--|-----|------|---------|---------|---------|--------|--------|
|--|-----|------|---------|---------|---------|--------|--------|

PGC\_SCZ wave3 eur only

|    |      |          |              |             |       |       |
|----|------|----------|--------------|-------------|-------|-------|
| 40 | 1.00 | 2.68e-12 | 0.347(53386) | 0.33(77258) | 0.064 | 0.009 |
|----|------|----------|--------------|-------------|-------|-------|

PGC\_SCZ wave3 asn only

|   |      |         |              |              |       |       |
|---|------|---------|--------------|--------------|-------|-------|
| 6 | 1.01 | 5.3e-06 | 0.311(14004) | 0.288(16757) | 0.084 | 0.018 |
|---|------|---------|--------------|--------------|-------|-------|

PGC\_SCZ wave2 only

|    |      |          |              |              |       |       |
|----|------|----------|--------------|--------------|-------|-------|
| 32 | 1.00 | 8.46e-08 | 0.341(34850) | 0.326(44347) | 0.061 | 0.012 |
|----|------|----------|--------------|--------------|-------|-------|

PGC\_SCZ wave3 (excl. wave2)

|    |      |          |              |              |       |       |
|----|------|----------|--------------|--------------|-------|-------|
| 14 | 1.00 | 1.97e-10 | 0.338(32540) | 0.319(49668) | 0.074 | 0.012 |
|----|------|----------|--------------|--------------|-------|-------|

**PGC\_SCZ wave3 (incl. wave2)**

|           |             |                 |                     |                     |              |              |
|-----------|-------------|-----------------|---------------------|---------------------|--------------|--------------|
| <b>46</b> | <b>1.00</b> | <b>1.18e-16</b> | <b>0.339(67390)</b> | <b>0.322(94015)</b> | <b>0.067</b> | <b>0.008</b> |
|-----------|-------------|-----------------|---------------------|---------------------|--------------|--------------|

Decode - Replication

|   |      |       |             |               |       |       |
|---|------|-------|-------------|---------------|-------|-------|
| 0 | 1.00 | 0.644 | 0.324(1979) | 0.292(142627) | 0.074 | 0.041 |
|---|------|-------|-------------|---------------|-------|-------|

**PGC\_SCZ wave3 (incl. wave2 and replication)**

|           |             |                 |                     |                      |              |              |
|-----------|-------------|-----------------|---------------------|----------------------|--------------|--------------|
| <b>46</b> | <b>1.00</b> | <b>1.42e-16</b> | <b>0.339(69369)</b> | <b>0.304(236642)</b> | <b>0.066</b> | <b>0.008</b> |
|-----------|-------------|-----------------|---------------------|----------------------|--------------|--------------|

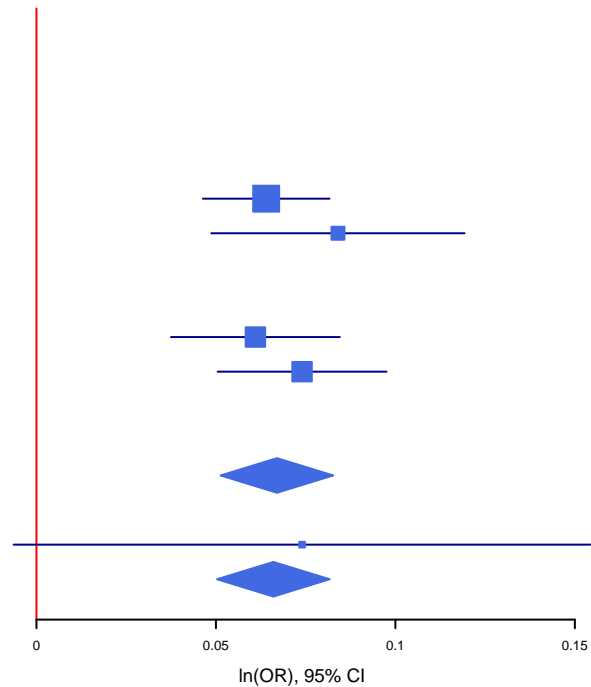

rs1451488

|     |                         |
|-----|-------------------------|
| A/G | 2:199990107             |
| —   | het_P: 0.545 het_I: 0.0 |

|                                             | ngt | info | p_value  | f_ca(n)      | f_co(n)       | ln(OR) | STDerr |
|---------------------------------------------|-----|------|----------|--------------|---------------|--------|--------|
| PGC_SCZ wave3 eur only                      | 44  | 0.99 | 4.47e-16 | 0.432(53386) | 0.445(77258)  | -0.071 | 0.009  |
| PGC_SCZ wave3 asn only                      | 4   | 0.96 | 0.0191   | 0.676(14004) | 0.683(16757)  | -0.044 | 0.019  |
| PGC_SCZ wave2 only                          | 15  | 0.98 | 2.92e-08 | 0.443(34850) | 0.446(44347)  | -0.061 | 0.011  |
| PGC_SCZ wave3 (excl. wave2)                 | 33  | 0.98 | 3.53e-10 | 0.526(32540) | 0.525(49668)  | -0.071 | 0.011  |
| PGC_SCZ wave3 (incl. wave2)                 | 48  | 0.98 | 6.72e-17 | 0.483(67390) | 0.488(94015)  | -0.066 | 0.008  |
| Decode – Replication                        | 0   | 1.00 | 0.704    | 0.446(1979)  | 0.408(142627) | -0.071 | 0.039  |
| PGC_SCZ wave3 (incl. wave2 and replication) | 48  | 0.99 | 1.44e-16 | 0.482(69369) | 0.44(236642)  | -0.064 | 0.008  |

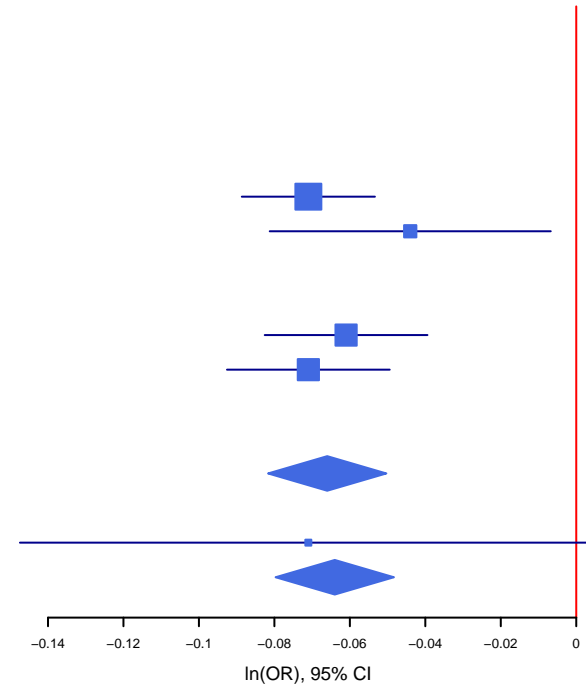



|                                                    |           |             |                 |                     |                      |              |              |
|----------------------------------------------------|-----------|-------------|-----------------|---------------------|----------------------|--------------|--------------|
| rs6943762                                          | T/C       |             | 7:86403263      |                     |                      |              |              |
|                                                    | ++        |             | het_P:          |                     | 0.601                | het_I:       | 0.0          |
|                                                    | ngt       | info        | p_value         | f_ca(n)             | f_co(n)              | ln(OR)       | STDerr       |
| PGC_SCZ wave3 eur only                             | 35        | 0.99        | 1.57e-15        | 0.883(53386)        | 0.87(77258)          | 0.105        | 0.013        |
| PGC_SCZ wave3 asn only                             | 6         | 0.97        | 0.0108          | 0.938(14004)        | 0.933(16757)         | 0.09         | 0.035        |
| PGC_SCZ wave2 only                                 | 26        | 1.00        | 5.22e-11        | 0.885(34850)        | 0.871(44347)         | 0.109        | 0.017        |
| PGC_SCZ wave3 (excl. wave2)                        | 15        | 0.98        | 1.97e-07        | 0.904(32540)        | 0.891(49668)         | 0.096        | 0.018        |
| <b>PGC_SCZ wave3 (incl. wave2)</b>                 | <b>41</b> | <b>0.99</b> | <b>6.3e-17</b>  | <b>0.894(67390)</b> | <b>0.881(94015)</b>  | <b>0.103</b> | <b>0.012</b> |
| Decode – Replication                               | 0         | 1.00        | 0.655           | 0.875(1979)         | 0.873(142627)        | 0.096        | 0.057        |
| <b>PGC_SCZ wave3 (incl. wave2 and replication)</b> | <b>41</b> | <b>1.00</b> | <b>1.83e-16</b> | <b>0.893(69369)</b> | <b>0.876(236642)</b> | <b>0.1</b>   | <b>0.012</b> |

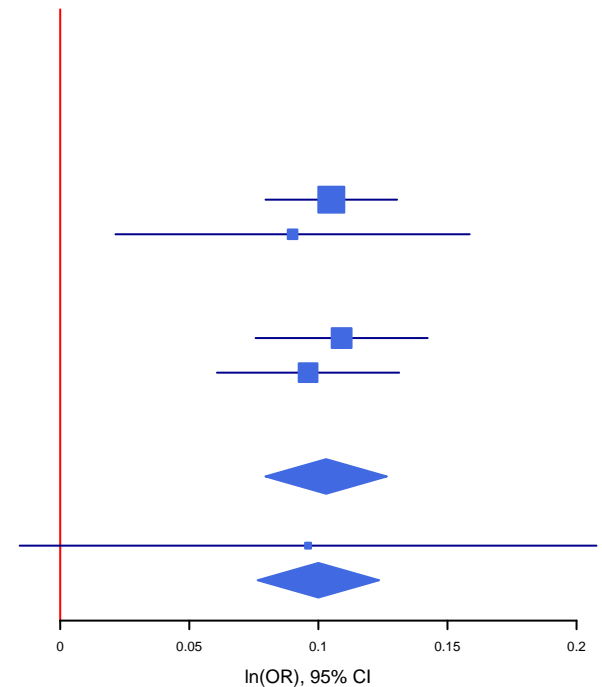

rs6482437

| A/C | 10:18726326                |
|-----|----------------------------|
| —   | het_P: 0.433    het_I: 0.0 |

|                                             | ngt | info | p_value  | f_ca(n)      | f_co(n)       | ln(OR) | STDerr |
|---------------------------------------------|-----|------|----------|--------------|---------------|--------|--------|
| PGC_SCZ wave3 eur only                      | 0   | 0.98 | 3.33e-12 | 0.099(53386) | 0.112(77258)  | -0.099 | 0.014  |
| PGC_SCZ wave3 asn only                      | 0   | 0.91 | 0.000295 | 0.039(14004) | 0.044(16757)  | -0.162 | 0.045  |
| PGC_SCZ wave2 only                          | 0   | 1.00 | 2.62e-10 | 0.096(34850) | 0.108(44347)  | -0.114 | 0.018  |
| PGC_SCZ wave3 (excl. wave2)                 | 0   | 0.95 | 6.04e-06 | 0.078(32540) | 0.092(49668)  | -0.093 | 0.02   |
| PGC_SCZ wave3 (incl. wave2)                 | 0   | 0.97 | 1.05e-14 | 0.087(67390) | 0.1(94015)    | -0.105 | 0.014  |
| Decode – Replication                        | 0   | 1.00 | 0.00419  | 0.106(1979)  | 0.115(142627) | -0.093 | 0.063  |
| PGC_SCZ wave3 (incl. wave2 and replication) | 0   | 0.99 | 2.73e-16 | 0.087(69369) | 0.109(236642) | -0.108 | 0.013  |

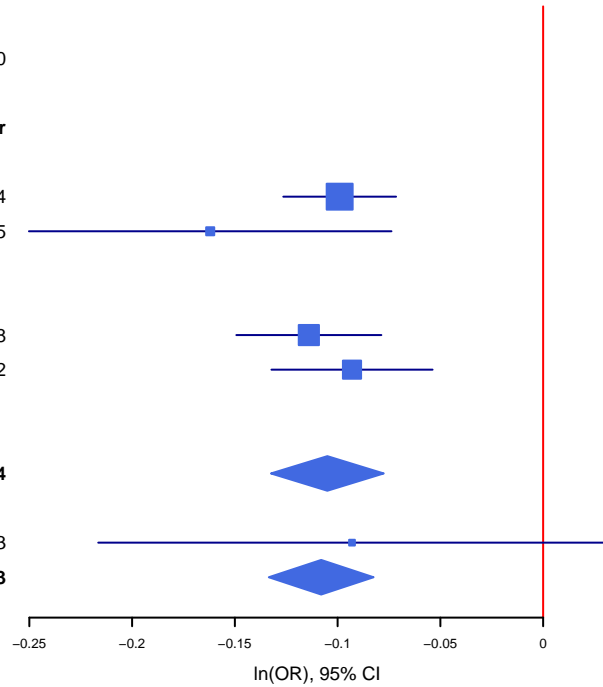

| rs3814883                                          | C/T       |             | 16:29994922     |                     |                      |              |              |
|----------------------------------------------------|-----------|-------------|-----------------|---------------------|----------------------|--------------|--------------|
|                                                    | --        |             | het_P:          |                     | 0.091                | het_I:       | 64.9         |
|                                                    | ngt       | info        | p_value         | f_ca(n)             | f_co(n)              | ln(OR)       | STDerr       |
| PGC_SCZ wave3 eur only                             | 34        | 0.98        | 1.58e-14        | 0.548(53386)        | 0.533(77258)         | 0.067        | 0.009        |
| PGC_SCZ wave3 asn only                             | 3         | 0.90        | 0.0522          | 0.562(14004)        | 0.549(16757)         | 0.035        | 0.018        |
| PGC_SCZ wave2 only                                 | 5         | 0.97        | 2.1e-11         | 0.548(34850)        | 0.532(44347)         | 0.074        | 0.011        |
| PGC_SCZ wave3 (excl. wave2)                        | 32        | 0.96        | 2.08e-05        | 0.554(32540)        | 0.54(49668)          | 0.048        | 0.011        |
| <b>PGC_SCZ wave3 (incl. wave2)</b>                 | <b>37</b> | <b>0.96</b> | <b>8.82e-15</b> | <b>0.551(67390)</b> | <b>0.536(94015)</b>  | <b>0.061</b> | <b>0.008</b> |
| Decode - Replication                               | 0         | 1.00        | 0.00175         | 0.552(1979)         | 0.537(142627)        | 0.048        | 0.038        |
| <b>PGC_SCZ wave3 (incl. wave2 and replication)</b> | <b>37</b> | <b>0.98</b> | <b>2.79e-16</b> | <b>0.551(69369)</b> | <b>0.536(236642)</b> | <b>0.063</b> | <b>0.008</b> |

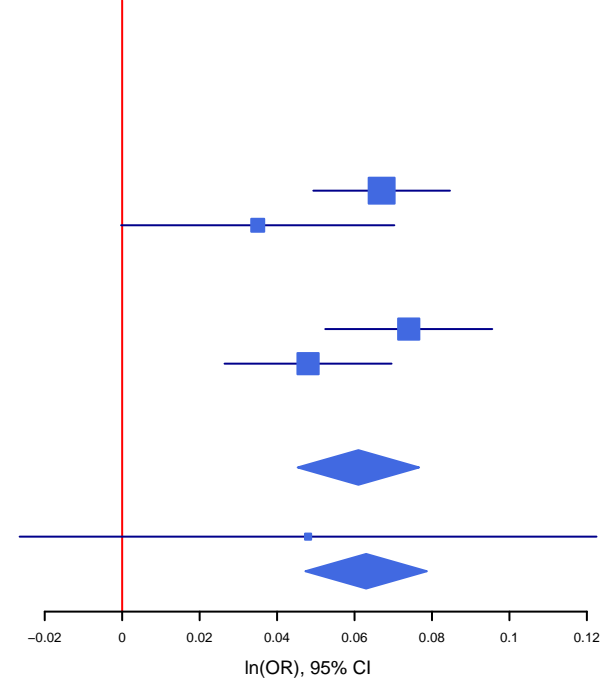

|                                                    |           |             |                        |                     |                      |               |              |
|----------------------------------------------------|-----------|-------------|------------------------|---------------------|----------------------|---------------|--------------|
| rs6065094                                          | A/G       |             | 20:37453194            |                     |                      |               |              |
|                                                    | —         |             | het_P: 0.56 het_I: 0.0 |                     |                      |               |              |
|                                                    | ngt       | info        | p_value                | f_ca(n)             | f_co(n)              | ln(OR)        | STDerr       |
| PGC_SCZ wave3 eur only                             | 36        | 1.00        | 1.56e-15               | 0.31(53386)         | 0.323(77258)         | -0.074        | 0.009        |
| PGC_SCZ wave3 asn only                             | 5         | 1.00        | 0.197                  | 0.314(14004)        | 0.322(16757)         | -0.024        | 0.018        |
| PGC_SCZ wave2 only                                 | 29        | 1.00        | 4.75e-09               | 0.308(34850)        | 0.321(44347)         | -0.068        | 0.012        |
| PGC_SCZ wave3 (excl. wave2)                        | 12        | 1.00        | 5e-07                  | 0.315(32540)        | 0.324(49668)         | -0.059        | 0.012        |
| <b>PGC_SCZ wave3 (incl. wave2)</b>                 | <b>41</b> | <b>1.00</b> | <b>1.41e-14</b>        | <b>0.311(67390)</b> | <b>0.323(94015)</b>  | <b>-0.063</b> | <b>0.008</b> |
| Decode – Replication                               | 0         | 1.00        | 0.00859                | 0.326(1979)         | 0.321(142627)        | -0.059        | 0.041        |
| <b>PGC_SCZ wave3 (incl. wave2 and replication)</b> | <b>41</b> | <b>1.00</b> | <b>5.72e-16</b>        | <b>0.311(69369)</b> | <b>0.322(236642)</b> | <b>-0.065</b> | <b>0.008</b> |

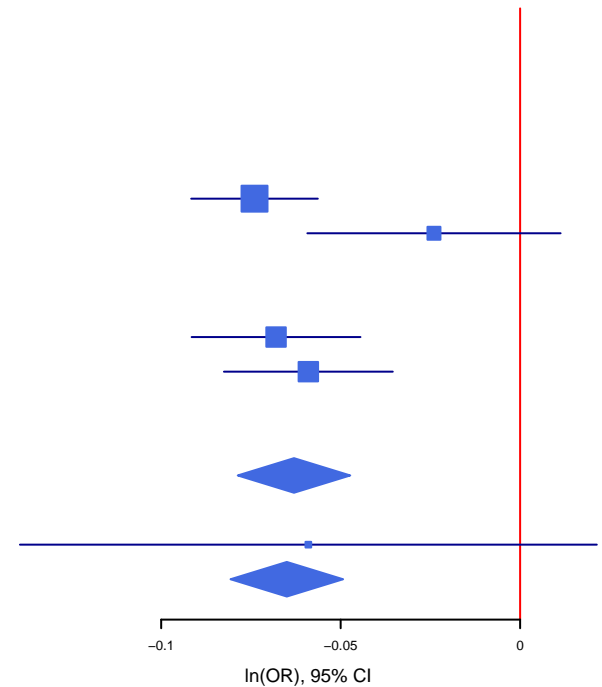

| rs2456020                                          | C/T      |             | 15:78868398     |                     |                      |              |              |
|----------------------------------------------------|----------|-------------|-----------------|---------------------|----------------------|--------------|--------------|
|                                                    | --       |             | het_P:          |                     | 0.051                | het_I:       | 73.8         |
|                                                    | ngt      | info        | p_value         | f_ca(n)             | f_co(n)              | ln(OR)       | STDerr       |
| PGC_SCZ wave3 eur only                             | 6        | 1.00        | 1.12e-15        | 0.773(53386)        | 0.759(77258)         | 0.082        | 0.01         |
| PGC_SCZ wave3 asn only                             | 0        | 0.97        | 0.0697          | 0.477(14004)        | 0.469(16757)         | 0.031        | 0.017        |
| PGC_SCZ wave2 only                                 | 1        | 1.00        | 1.08e-11        | 0.759(34850)        | 0.752(44347)         | 0.087        | 0.013        |
| PGC_SCZ wave3 (excl. wave2)                        | 5        | 0.99        | 1.46e-05        | 0.66(32540)         | 0.668(49668)         | 0.052        | 0.012        |
| <b>PGC_SCZ wave3 (incl. wave2)</b>                 | <b>6</b> | <b>0.99</b> | <b>5.35e-15</b> | <b>0.711(67390)</b> | <b>0.707(94015)</b>  | <b>0.068</b> | <b>0.009</b> |
| Decode – Replication                               | 0        | 1.00        | 0.0207          | 0.754(1979)         | 0.77(142627)         | 0.052        | 0.045        |
| <b>PGC_SCZ wave3 (incl. wave2 and replication)</b> | <b>6</b> | <b>1.00</b> | <b>6.32e-16</b> | <b>0.712(69369)</b> | <b>0.745(236642)</b> | <b>0.07</b>  | <b>0.009</b> |

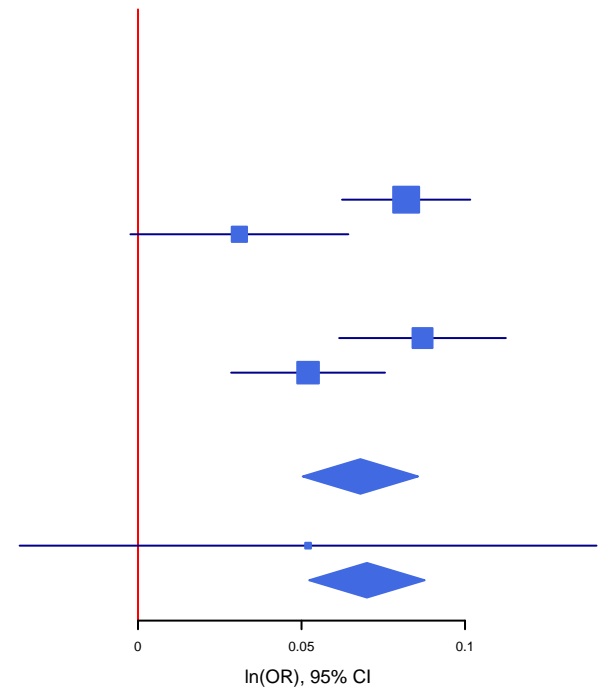

rs10035564

A/G

5:45252500

—

het\_P:

0.313

het\_I:

1.6

|  | ngt | info | p_value | f_ca(n) | f_co(n) | ln(OR) | STDerr |
|--|-----|------|---------|---------|---------|--------|--------|
|--|-----|------|---------|---------|---------|--------|--------|

PGC\_SCZ wave3 eur only

|   |      |          |             |              |        |       |
|---|------|----------|-------------|--------------|--------|-------|
| 8 | 0.97 | 4.38e-13 | 0.65(53386) | 0.669(77258) | -0.067 | 0.009 |
|---|------|----------|-------------|--------------|--------|-------|

PGC\_SCZ wave3 asn only

|   |      |          |              |              |        |       |
|---|------|----------|--------------|--------------|--------|-------|
| 2 | 0.96 | 0.000825 | 0.487(14004) | 0.502(16757) | -0.058 | 0.017 |
|---|------|----------|--------------|--------------|--------|-------|

PGC\_SCZ wave2 only

|   |      |          |              |              |        |       |
|---|------|----------|--------------|--------------|--------|-------|
| 7 | 0.96 | 1.25e-06 | 0.645(34850) | 0.665(44347) | -0.056 | 0.012 |
|---|------|----------|--------------|--------------|--------|-------|

PGC\_SCZ wave3 (excl. wave2)

|   |      |          |              |              |        |       |
|---|------|----------|--------------|--------------|--------|-------|
| 3 | 0.98 | 1.55e-10 | 0.586(32540) | 0.615(49668) | -0.073 | 0.011 |
|---|------|----------|--------------|--------------|--------|-------|

PGC\_SCZ wave3 (incl. wave2)

|    |      |          |              |              |        |       |
|----|------|----------|--------------|--------------|--------|-------|
| 10 | 0.97 | 1.65e-15 | 0.616(67390) | 0.639(94015) | -0.065 | 0.008 |
|----|------|----------|--------------|--------------|--------|-------|

Decode – Replication

|   |      |       |             |               |        |       |
|---|------|-------|-------------|---------------|--------|-------|
| 0 | 1.00 | 0.286 | 0.676(1979) | 0.737(142627) | -0.073 | 0.041 |
|---|------|-------|-------------|---------------|--------|-------|

PGC\_SCZ wave3 (incl. wave2 and replication)

|    |      |          |              |               |        |       |
|----|------|----------|--------------|---------------|--------|-------|
| 10 | 0.99 | 7.91e-16 | 0.618(69369) | 0.698(236642) | -0.064 | 0.008 |
|----|------|----------|--------------|---------------|--------|-------|

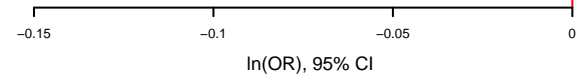

|                                                    |          |             |                 |                     |                      |              |              |
|----------------------------------------------------|----------|-------------|-----------------|---------------------|----------------------|--------------|--------------|
| rs1858999                                          | C/G      |             | 19:19497669     |                     |                      |              |              |
|                                                    | ++       |             | het_P:          |                     | 0.843                | het_I:       | 0.0          |
|                                                    | ngt      | info        | p_value         | f_ca(n)             | f_co(n)              | ln(OR)       | STDerr       |
| PGC_SCZ wave3 eur only                             | 0        | 0.99        | 3.73e-16        | 0.373(53386)        | 0.355(77258)         | 0.073        | 0.009        |
| PGC_SCZ wave3 asn only                             | 0        | 0.97        | 0.798           | 0.292(14004)        | 0.292(16757)         | 0.005        | 0.019        |
| PGC_SCZ wave2 only                                 | 0        | 0.99        | 4.42e-08        | 0.364(34850)        | 0.349(44347)         | 0.062        | 0.011        |
| PGC_SCZ wave3 (excl. wave2)                        | 0        | 0.99        | 3.6e-07         | 0.348(32540)        | 0.339(49668)         | 0.059        | 0.012        |
| <b>PGC_SCZ wave3 (incl. wave2)</b>                 | <b>0</b> | <b>0.99</b> | <b>7.97e-14</b> | <b>0.356(67390)</b> | <b>0.344(94015)</b>  | <b>0.061</b> | <b>0.008</b> |
| Decode – Replication                               | 0        | 1.00        | 0.00419         | 0.352(1979)         | 0.361(142627)        | 0.059        | 0.04         |
| <b>PGC_SCZ wave3 (incl. wave2 and replication)</b> | <b>0</b> | <b>0.99</b> | <b>2.98e-15</b> | <b>0.356(69369)</b> | <b>0.354(236642)</b> | <b>0.063</b> | <b>0.008</b> |

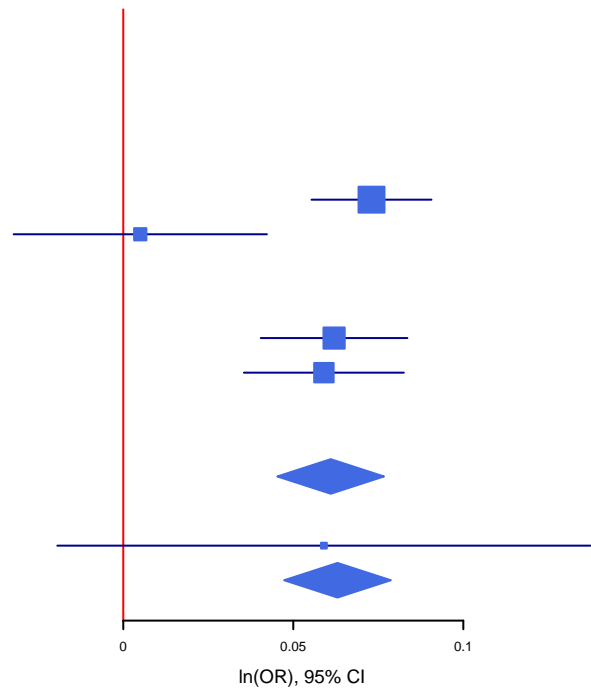

|                                                    |           |             |                 |                     |                      |              |              |
|----------------------------------------------------|-----------|-------------|-----------------|---------------------|----------------------|--------------|--------------|
| rs61937595                                         | C/T       |             | 12:57682956     |                     |                      |              |              |
|                                                    | —         |             | het_P:          |                     | 0.07                 | het_I:       | 69.6         |
|                                                    | ngt       | info        | p_value         | f_ca(n)             | f_co(n)              | ln(OR)       | STDerr       |
| PGC_SCZ wave3 eur only                             | 30        | 0.89        | 1.15e-15        | 0.917(53386)        | 0.908(77258)         | 0.13         | 0.016        |
| PGC_SCZ wave3 asn only                             | 0         | 0.34        | 0.641           | 0.95(10746)         | 0.95(13512)          | -0.033       | 0.071        |
| PGC_SCZ wave2 only                                 | 1         | 0.85        | 2.09e-12        | 0.917(34850)        | 0.905(44347)         | 0.146        | 0.021        |
| PGC_SCZ wave3 (excl. wave2)                        | 29        | 0.78        | 0.000276        | 0.928(29282)        | 0.922(46423)         | 0.088        | 0.024        |
| <b>PGC_SCZ wave3 (incl. wave2)</b>                 | <b>30</b> | <b>0.81</b> | <b>1.32e-14</b> | <b>0.922(64132)</b> | <b>0.914(90770)</b>  | <b>0.122</b> | <b>0.016</b> |
| Decode – Replication                               | 0         | 1.00        | 0.107           | 0.918(1979)         | 0.914(142627)        | 0.088        | 0.073        |
| <b>PGC_SCZ wave3 (incl. wave2 and replication)</b> | <b>30</b> | <b>0.92</b> | <b>3.07e-15</b> | <b>0.922(66111)</b> | <b>0.914(233397)</b> | <b>0.122</b> | <b>0.015</b> |

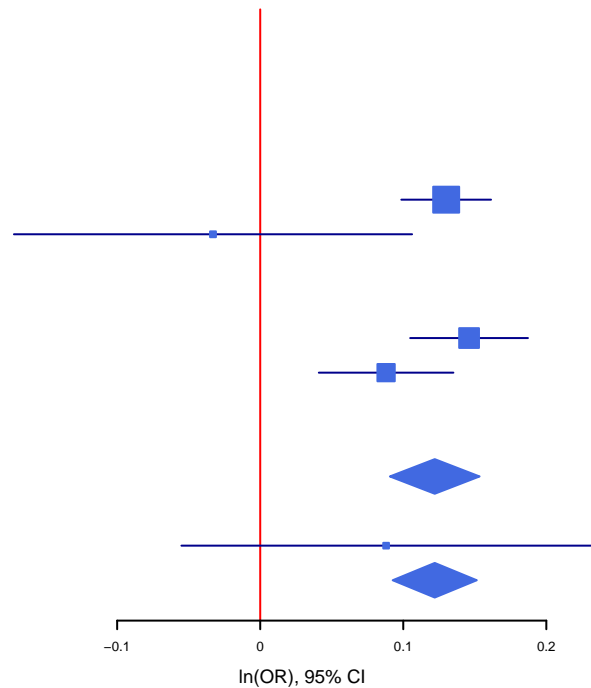



|                                                    |          |             |                 |                     |                      |              |              |
|----------------------------------------------------|----------|-------------|-----------------|---------------------|----------------------|--------------|--------------|
| rs2304205                                          | A/C      |             | 19:50168927     |                     |                      |              |              |
|                                                    | ++       |             | het_P:          | 0.231               | het_I:               | 30.3         |              |
|                                                    | ngt      | info        | p_value         | f_ca(n)             | f_co(n)              | ln(OR)       | STDerr       |
| PGC_SCZ wave3 eur only                             | 7        | 0.96        | 1.14e-11        | 0.753(53386)        | 0.742(77258)         | 0.069        | 0.01         |
| PGC_SCZ wave3 asn only                             | 1        | 0.91        | 0.000466        | 0.808(14004)        | 0.795(16757)         | 0.078        | 0.022        |
| PGC_SCZ wave2 only                                 | 1        | 0.93        | 4.36e-06        | 0.752(34850)        | 0.744(44347)         | 0.06         | 0.013        |
| PGC_SCZ wave3 (excl. wave2)                        | 7        | 0.97        | 5.41e-10        | 0.777(32540)        | 0.759(49668)         | 0.082        | 0.013        |
| <b>PGC_SCZ wave3 (incl. wave2)</b>                 | <b>8</b> | <b>0.95</b> | <b>2.38e-14</b> | <b>0.764(67390)</b> | <b>0.752(94015)</b>  | <b>0.07</b>  | <b>0.009</b> |
| Decode – Replication                               | 0        | 1.00        | 0.0634          | 0.725(1979)         | 0.744(142627)        | 0.082        | 0.042        |
| <b>PGC_SCZ wave3 (incl. wave2 and replication)</b> | <b>8</b> | <b>0.98</b> | <b>3.47e-15</b> | <b>0.763(69369)</b> | <b>0.747(236642)</b> | <b>0.071</b> | <b>0.009</b> |

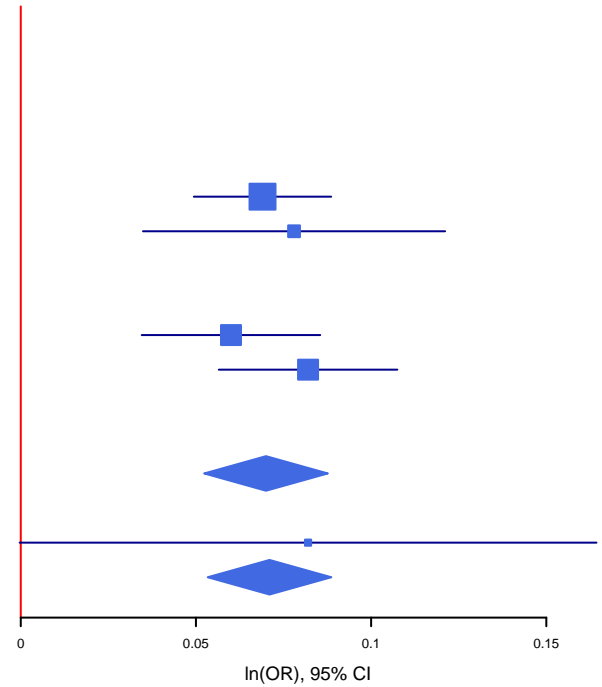

| rs4936215                                          | A/G      |             | 11:133852684    |                     |                     |              |             |
|----------------------------------------------------|----------|-------------|-----------------|---------------------|---------------------|--------------|-------------|
|                                                    | ++       |             | het_P:          |                     | 0.631               | het_I:       | 0.0         |
|                                                    | ngt      | info        | p_value         | f_ca(n)             | f_co(n)             | ln(OR)       | STDerr      |
| PGC_SCZ wave3 eur only                             | 5        | 0.95        | 1.87e-14        | 0.788(53386)        | 0.769(77258)        | 0.082        | 0.011       |
| PGC_SCZ wave3 asn only                             | 1        | 0.82        | 0.029           | 0.955(13014)        | 0.951(15757)        | 0.105        | 0.048       |
| PGC_SCZ wave2 only                                 | 0        | 0.96        | 1.14e-10        | 0.793(34850)        | 0.769(44347)        | 0.087        | 0.014       |
| PGC_SCZ wave3 (excl. wave2)                        | 6        | 0.90        | 2.9e-06         | 0.852(31550)        | 0.828(48668)        | 0.077        | 0.016       |
| <b>PGC_SCZ wave3 (incl. wave2)</b>                 | <b>6</b> | <b>0.93</b> | <b>1.86e-15</b> | <b>0.821(66400)</b> | <b>0.8(93015)</b>   | <b>0.083</b> | <b>0.01</b> |
| Decode – Replication                               | 0        | 1.00        | 0.676           | 0.772(1979)         | 0.751(142627)       | 0.077        | 0.045       |
| <b>PGC_SCZ wave3 (incl. wave2 and replication)</b> | <b>6</b> | <b>0.97</b> | <b>4.16e-15</b> | <b>0.82(68379)</b>  | <b>0.77(235642)</b> | <b>0.08</b>  | <b>0.01</b> |

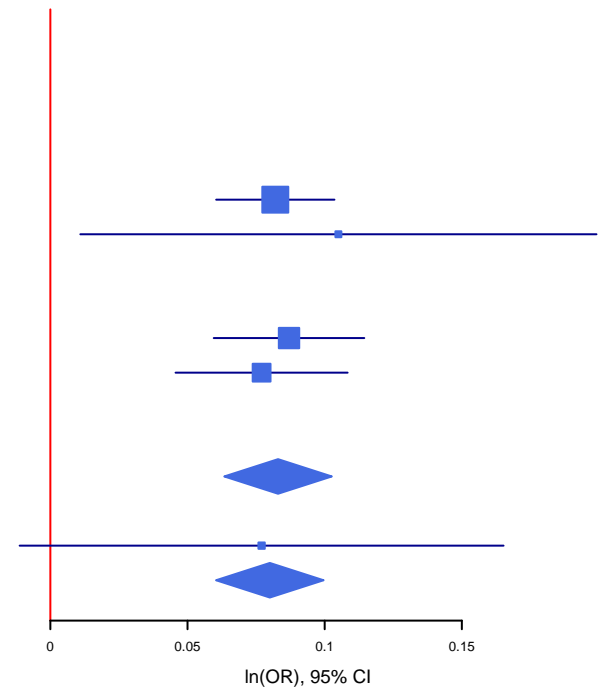

| rs56335113                                         | A/G      |             | 1:30427639      |                     |                      |              |              |
|----------------------------------------------------|----------|-------------|-----------------|---------------------|----------------------|--------------|--------------|
|                                                    | ++       |             | het_P:          | 0.759               | het_I:               | 0.0          |              |
|                                                    | ngt      | info        | p_value         | f_ca(n)             | f_co(n)              | ln(OR)       | STDerr       |
| PGC_SCZ wave3 eur only                             | 6        | 0.98        | 6.02e-12        | 0.316(53386)        | 0.303(77258)         | 0.065        | 0.009        |
| PGC_SCZ wave3 asn only                             | 0        | 0.95        | 0.000105        | 0.3(14004)          | 0.285(16757)         | 0.074        | 0.019        |
| PGC_SCZ wave2 only                                 | 0        | 0.98        | 5.59e-09        | 0.314(34850)        | 0.299(44347)         | 0.069        | 0.012        |
| PGC_SCZ wave3 (excl. wave2)                        | 6        | 0.97        | 1.04e-07        | 0.311(32540)        | 0.3(49668)           | 0.064        | 0.012        |
| <b>PGC_SCZ wave3 (incl. wave2)</b>                 | <b>6</b> | <b>0.97</b> | <b>3.15e-15</b> | <b>0.313(67390)</b> | <b>0.3(94015)</b>    | <b>0.067</b> | <b>0.008</b> |
| Decode – Replication                               | 0        | 1.00        | 0.76            | 0.281(1979)         | 0.279(142627)        | 0.064        | 0.043        |
| <b>PGC_SCZ wave3 (incl. wave2 and replication)</b> | <b>6</b> | <b>0.99</b> | <b>4.56e-15</b> | <b>0.312(69369)</b> | <b>0.287(236642)</b> | <b>0.065</b> | <b>0.008</b> |

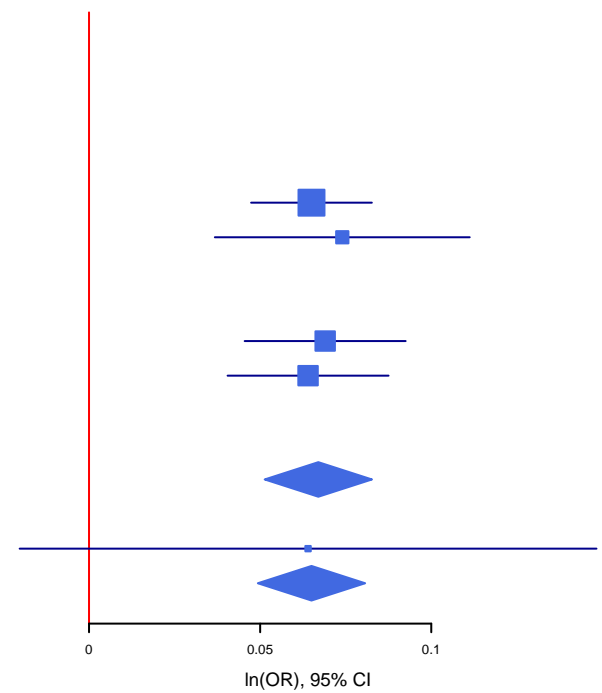

rs12991836

|     |                         |
|-----|-------------------------|
| A/C | 2:145141541             |
| --- | het_P: 0.876 het_I: 0.0 |

|                                             | ngt | info | p_value  | f_ca(n)      | f_co(n)       | ln(OR) | STDerr |
|---------------------------------------------|-----|------|----------|--------------|---------------|--------|--------|
| PGC_SCZ wave3 eur only                      | 73  | 0.99 | 1.62e-11 | 0.63(53386)  | 0.643(77258)  | -0.061 | 0.009  |
| PGC_SCZ wave3 asn only                      | 10  | 0.96 | 0.00397  | 0.457(14004) | 0.463(16757)  | -0.05  | 0.017  |
| PGC_SCZ wave2 only                          | 39  | 0.99 | 4.45e-07 | 0.62(34850)  | 0.636(44347)  | -0.057 | 0.011  |
| PGC_SCZ wave3 (excl. wave2)                 | 44  | 0.98 | 1.25e-07 | 0.566(32540) | 0.589(49668)  | -0.06  | 0.011  |
| PGC_SCZ wave3 (incl. wave2)                 | 83  | 0.99 | 2.72e-13 | 0.594(67390) | 0.611(94015)  | -0.058 | 0.008  |
| Decode - Replication                        | 0   | 1.00 | 0.00135  | 0.645(1979)  | 0.649(142627) | -0.06  | 0.039  |
| PGC_SCZ wave3 (incl. wave2 and replication) | 83  | 0.99 | 6.56e-15 | 0.595(69369) | 0.634(236642) | -0.061 | 0.008  |

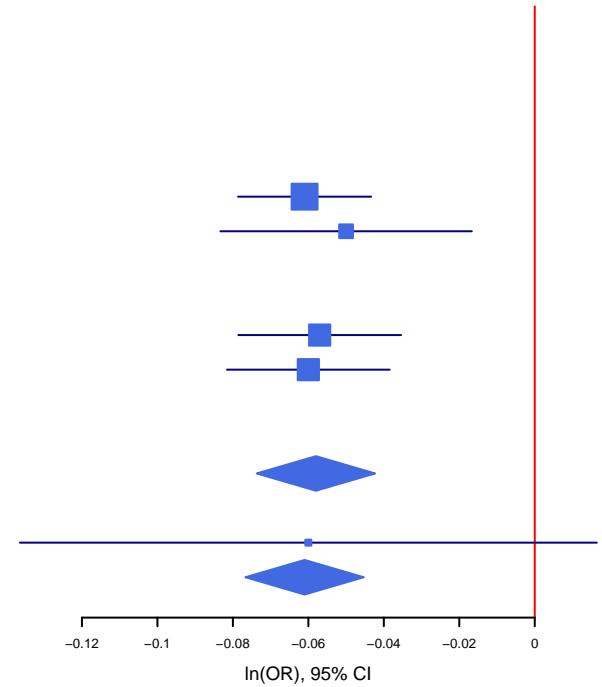

rs41533650

G/A

4:176869252

++

het\_P:

0.6

het\_I:

0.0

| ngt | info | p_value | f_ca(n) | f_co(n) | ln(OR) | STDerr |
|-----|------|---------|---------|---------|--------|--------|
|-----|------|---------|---------|---------|--------|--------|

PGC\_SCZ wave3 eur only

|    |      |       |              |              |       |      |
|----|------|-------|--------------|--------------|-------|------|
| 11 | 1.00 | 2e-11 | 0.776(53386) | 0.785(77258) | -0.07 | 0.01 |
|----|------|-------|--------------|--------------|-------|------|

PGC\_SCZ wave3 asn only

|   |      |          |              |             |       |       |
|---|------|----------|--------------|-------------|-------|-------|
| 4 | 0.97 | 0.000826 | 0.882(14004) | 0.89(16757) | -0.09 | 0.027 |
|---|------|----------|--------------|-------------|-------|-------|

PGC\_SCZ wave2 only

|    |      |         |             |              |        |       |
|----|------|---------|-------------|--------------|--------|-------|
| 11 | 1.00 | 2.6e-07 | 0.78(34850) | 0.787(44347) | -0.068 | 0.013 |
|----|------|---------|-------------|--------------|--------|-------|

PGC\_SCZ wave3 (excl. wave2)

|   |      |          |              |              |        |       |
|---|------|----------|--------------|--------------|--------|-------|
| 4 | 0.99 | 5.91e-08 | 0.818(32540) | 0.819(49668) | -0.078 | 0.014 |
|---|------|----------|--------------|--------------|--------|-------|

PGC\_SCZ wave3 (incl. wave2)

|    |      |          |              |              |        |      |
|----|------|----------|--------------|--------------|--------|------|
| 15 | 0.99 | 8.69e-14 | 0.798(67390) | 0.803(94015) | -0.072 | 0.01 |
|----|------|----------|--------------|--------------|--------|------|

Decode - Replication

|   |      |        |             |               |        |       |
|---|------|--------|-------------|---------------|--------|-------|
| 0 | 1.00 | 0.0429 | 0.779(1979) | 0.747(142627) | -0.078 | 0.045 |
|---|------|--------|-------------|---------------|--------|-------|

PGC\_SCZ wave3 (incl. wave2 and replication)

|    |      |          |              |               |        |      |
|----|------|----------|--------------|---------------|--------|------|
| 15 | 1.00 | 1.14e-14 | 0.797(69369) | 0.769(236642) | -0.073 | 0.01 |
|----|------|----------|--------------|---------------|--------|------|

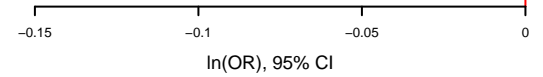

| rs11638554                                         | T/G      |             | 15:85148231     |                     |                     |              |              |
|----------------------------------------------------|----------|-------------|-----------------|---------------------|---------------------|--------------|--------------|
|                                                    | ++       |             | het_P:          | 0.161               | het_I:              | 49.1         |              |
|                                                    | ngt      | info        | p_value         | f_ca(n)             | f_co(n)             | ln(OR)       | STDerr       |
| PGC_SCZ wave3 eur only                             | 0        | 0.99        | 7.58e-12        | 0.715(53386)        | 0.701(77258)        | 0.065        | 0.01         |
| PGC_SCZ wave3 asn only                             | 0        | 0.95        | 0.0143          | 0.859(14004)        | 0.854(16757)        | 0.061        | 0.025        |
| PGC_SCZ wave2 only                                 | 0        | 0.99        | 2.96e-10        | 0.723(34850)        | 0.703(44347)        | 0.076        | 0.012        |
| PGC_SCZ wave3 (excl. wave2)                        | 0        | 0.98        | 0.000103        | 0.769(32540)        | 0.75(49668)         | 0.051        | 0.013        |
| <b>PGC_SCZ wave3 (incl. wave2)</b>                 | <b>0</b> | <b>0.98</b> | <b>3.62e-13</b> | <b>0.745(67390)</b> | <b>0.728(94015)</b> | <b>0.065</b> | <b>0.009</b> |
| Decode – Replication                               | 0        | 1.00        | 0.00299         | 0.693(1979)         | 0.731(142627)       | 0.051        | 0.043        |
| <b>PGC_SCZ wave3 (incl. wave2 and replication)</b> | <b>0</b> | <b>0.99</b> | <b>1.37e-14</b> | <b>0.744(69369)</b> | <b>0.73(236642)</b> | <b>0.067</b> | <b>0.009</b> |

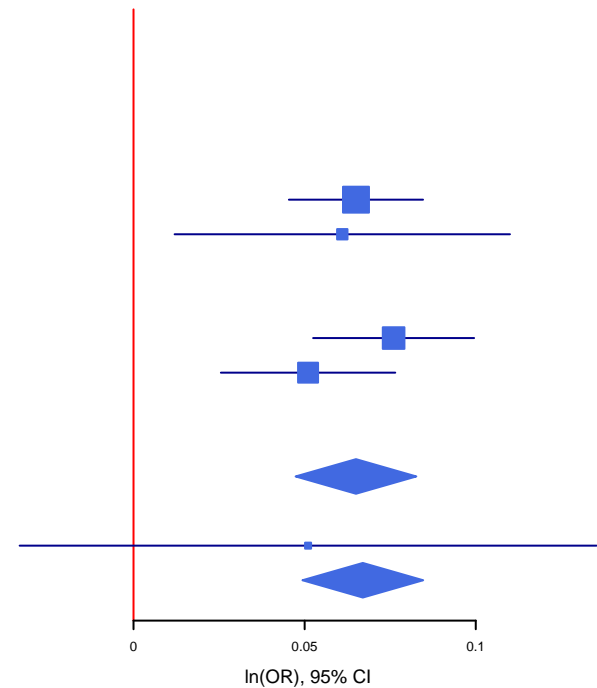

| rs11693094                                         | C/T      |             | 2:185601420     |                     |                      |              |              |
|----------------------------------------------------|----------|-------------|-----------------|---------------------|----------------------|--------------|--------------|
|                                                    | ---      |             | het_P:          | 0.222               | het_I:               | 33.0         |              |
|                                                    | ngt      | info        | p_value         | f_ca(n)             | f_co(n)              | ln(OR)       | STDerr       |
| PGC_SCZ wave3 eur only                             | 1        | 0.98        | 4.29e-10        | 0.556(53386)        | 0.539(77258)         | 0.054        | 0.009        |
| PGC_SCZ wave3 asn only                             | 0        | 0.92        | 8.66e-05        | 0.493(14004)        | 0.477(16757)         | 0.069        | 0.018        |
| PGC_SCZ wave2 only                                 | 0        | 0.98        | 1.2e-09         | 0.554(34850)        | 0.538(44347)         | 0.067        | 0.011        |
| PGC_SCZ wave3 (excl. wave2)                        | 1        | 0.96        | 1.83e-05        | 0.531(32540)        | 0.52(49668)          | 0.048        | 0.011        |
| <b>PGC_SCZ wave3 (incl. wave2)</b>                 | <b>1</b> | <b>0.97</b> | <b>2.2e-13</b>  | <b>0.543(67390)</b> | <b>0.528(94015)</b>  | <b>0.057</b> | <b>0.008</b> |
| Decode – Replication                               | 0        | 1.00        | 0.0127          | 0.523(1979)         | 0.5(142627)          | 0.048        | 0.038        |
| <b>PGC_SCZ wave3 (incl. wave2 and replication)</b> | <b>1</b> | <b>0.99</b> | <b>1.39e-14</b> | <b>0.542(69369)</b> | <b>0.511(236642)</b> | <b>0.059</b> | <b>0.008</b> |

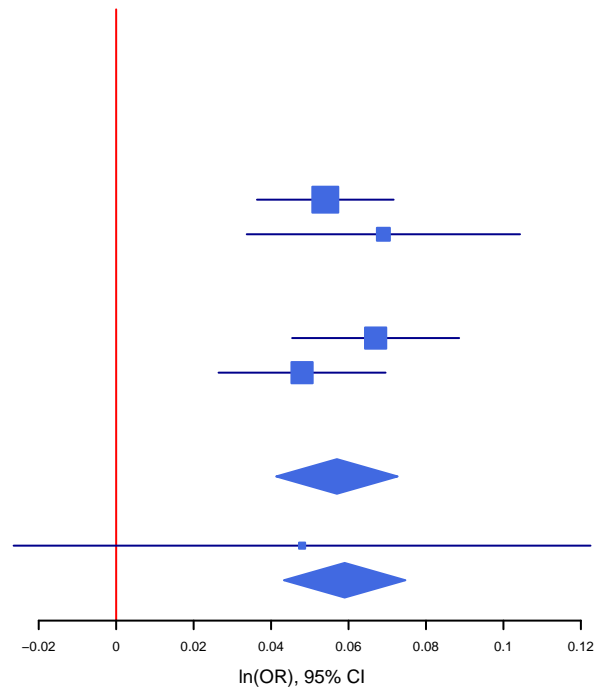

|                                                    |          |             |                 |                     |                      |               |              |
|----------------------------------------------------|----------|-------------|-----------------|---------------------|----------------------|---------------|--------------|
| rs2252074                                          | T/G      |             | 7:104594253     |                     |                      |               |              |
|                                                    | —        |             | het_P:          |                     | 0.608                | het_I:        | 0.0          |
|                                                    | ngt      | info        | p_value         | f_ca(n)             | f_co(n)              | ln(OR)        | STDerr       |
| PGC_SCZ wave3 eur only                             | 0        | 0.99        | 6.19e-15        | 0.59(53386)         | 0.605(77258)         | -0.069        | 0.009        |
| PGC_SCZ wave3 asn only                             | 0        | 0.99        | 0.093           | 0.529(14004)        | 0.536(16757)         | -0.029        | 0.017        |
| PGC_SCZ wave2 only                                 | 0        | 0.99        | 6.35e-09        | 0.587(34850)        | 0.606(44347)         | -0.064        | 0.011        |
| PGC_SCZ wave3 (excl. wave2)                        | 0        | 0.99        | 3.48e-07        | 0.567(32540)        | 0.58(49668)          | -0.056        | 0.011        |
| <b>PGC_SCZ wave3 (incl. wave2)</b>                 | <b>0</b> | <b>0.99</b> | <b>1.27e-14</b> | <b>0.577(67390)</b> | <b>0.592(94015)</b>  | <b>-0.06</b>  | <b>0.008</b> |
| Decode – Replication                               | 0        | 1.00        | 0.615           | 0.598(1979)         | 0.587(142627)        | -0.056        | 0.039        |
| <b>PGC_SCZ wave3 (incl. wave2 and replication)</b> | <b>0</b> | <b>1.00</b> | <b>1.58e-14</b> | <b>0.578(69369)</b> | <b>0.589(236642)</b> | <b>-0.059</b> | <b>0.008</b> |

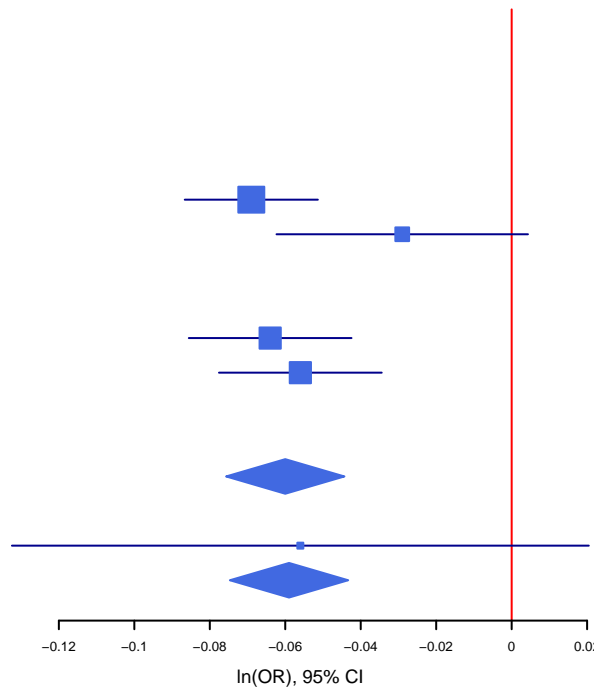



rs11587347

C/G

1:239198959

—

het\_P:

0.783

het\_I:

0.0

| ngt | info | p_value | f_ca(n) | f_co(n) | ln(OR) | STDerr |
|-----|------|---------|---------|---------|--------|--------|
|-----|------|---------|---------|---------|--------|--------|

PGC\_SCZ wave3 eur only

|    |      |          |              |              |        |       |
|----|------|----------|--------------|--------------|--------|-------|
| 24 | 0.95 | 1.53e-12 | 0.895(53386) | 0.906(77258) | -0.104 | 0.015 |
|----|------|----------|--------------|--------------|--------|-------|

PGC\_SCZ wave3 asn only

|   |      |        |              |              |        |       |
|---|------|--------|--------------|--------------|--------|-------|
| 4 | 0.71 | 0.0318 | 0.943(14004) | 0.946(16757) | -0.093 | 0.044 |
|---|------|--------|--------------|--------------|--------|-------|

PGC\_SCZ wave2 only

|   |      |          |              |              |        |       |
|---|------|----------|--------------|--------------|--------|-------|
| 1 | 0.95 | 1.79e-08 | 0.899(34850) | 0.908(44347) | -0.106 | 0.019 |
|---|------|----------|--------------|--------------|--------|-------|

PGC\_SCZ wave3 (excl. wave2)

|    |      |          |              |              |        |       |
|----|------|----------|--------------|--------------|--------|-------|
| 27 | 0.88 | 1.68e-06 | 0.911(32540) | 0.917(49668) | -0.099 | 0.021 |
|----|------|----------|--------------|--------------|--------|-------|

PGC\_SCZ wave3 (incl. wave2)

|    |      |         |              |              |        |       |
|----|------|---------|--------------|--------------|--------|-------|
| 28 | 0.91 | 1.5e-13 | 0.905(67390) | 0.913(94015) | -0.103 | 0.014 |
|----|------|---------|--------------|--------------|--------|-------|

Decode – Replication

|   |      |        |             |               |        |       |
|---|------|--------|-------------|---------------|--------|-------|
| 0 | 1.00 | 0.0344 | 0.899(1979) | 0.927(142627) | -0.099 | 0.063 |
|---|------|--------|-------------|---------------|--------|-------|

PGC\_SCZ wave3 (incl. wave2 and replication)

|    |      |          |              |               |        |       |
|----|------|----------|--------------|---------------|--------|-------|
| 28 | 0.96 | 1.61e-14 | 0.905(69369) | 0.921(236642) | -0.104 | 0.014 |
|----|------|----------|--------------|---------------|--------|-------|

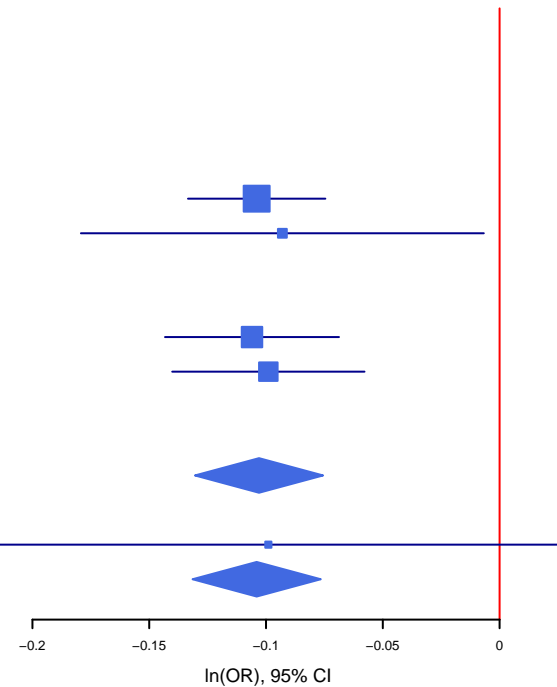

rs10873538

T/G 14:104255569  
— het\_P: 0.124 het\_I: 57.6

|                                             | ngt | info | p_value  | f_ca(n)      | f_co(n)      | ln(OR) | STDerr |
|---------------------------------------------|-----|------|----------|--------------|--------------|--------|--------|
| PGC_SCZ wave3 eur only                      | 0   | 0.99 | 3.01e-13 | 0.654(53386) | 0.666(77258) | -0.067 | 0.009  |
| PGC_SCZ wave3 asn only                      | 0   | 0.99 | 0.00633  | 0.669(14004) | 0.677(16757) | -0.05  | 0.018  |
| PGC_SCZ wave2 only                          | 0   | 0.99 | 4.44e-11 | 0.65(34850)  | 0.664(44347) | -0.076 | 0.012  |
| PGC_SCZ wave3 (excl. wave2)                 | 0   | 1.00 | 1.35e-05 | 0.664(32540) | 0.671(49668) | -0.051 | 0.012  |
| PGC_SCZ wave3 (incl. wave2)                 | 0   | 0.99 | 9.59e-15 | 0.657(67390) | 0.668(94015) | -0.063 | 0.008  |
| Decode – Replication                        | 0   | 1.00 | 0.842    | 0.697(1052)  | 0.697(1399)  | -0.051 | 0.065  |
| PGC_SCZ wave3 (incl. wave2 and replication) | 0   | 0.99 | 1.7e-14  | 0.658(68442) | 0.668(95414) | -0.062 | 0.008  |

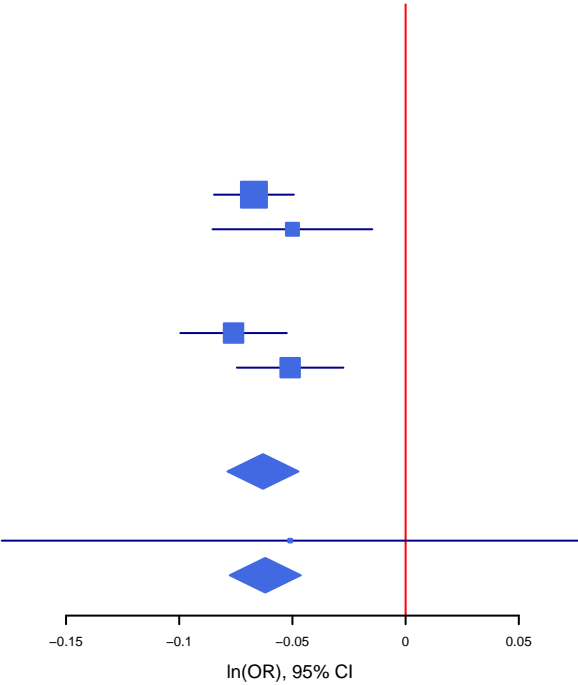

|                                                    |           |             |                 |                     |                      |              |              |
|----------------------------------------------------|-----------|-------------|-----------------|---------------------|----------------------|--------------|--------------|
| rs7432375                                          | G/A       |             | 3:136288405     |                     |                      |              |              |
|                                                    | --        |             | het_P:          |                     | 0.368                | het_I:       | 0.0          |
|                                                    | ngt       | info        | p_value         | f_ca(n)             | f_co(n)              | ln(OR)       | STDerr       |
| PGC_SCZ wave3 eur only                             | 31        | 1.00        | 8.33e-11        | 0.604(53386)        | 0.587(77258)         | 0.057        | 0.009        |
| PGC_SCZ wave3 asn only                             | 4         | 0.96        | 1.44e-06        | 0.204(14004)        | 0.185(16757)         | 0.106        | 0.022        |
| PGC_SCZ wave2 only                                 | 11        | 1.00        | 2.23e-10        | 0.58(34850)         | 0.571(44347)         | 0.071        | 0.011        |
| PGC_SCZ wave3 (excl. wave2)                        | 24        | 0.99        | 3.19e-06        | 0.458(32540)        | 0.465(49668)         | 0.056        | 0.012        |
| <b>PGC_SCZ wave3 (incl. wave2)</b>                 | <b>35</b> | <b>0.99</b> | <b>5.32e-15</b> | <b>0.521(67390)</b> | <b>0.515(94015)</b>  | <b>0.064</b> | <b>0.008</b> |
| Decode – Replication                               | 0         | 1.00        | 0.792           | 0.602(1979)         | 0.605(142627)        | 0.056        | 0.038        |
| <b>PGC_SCZ wave3 (incl. wave2 and replication)</b> | <b>35</b> | <b>1.00</b> | <b>1.84e-14</b> | <b>0.523(69369)</b> | <b>0.569(236642)</b> | <b>0.061</b> | <b>0.008</b> |

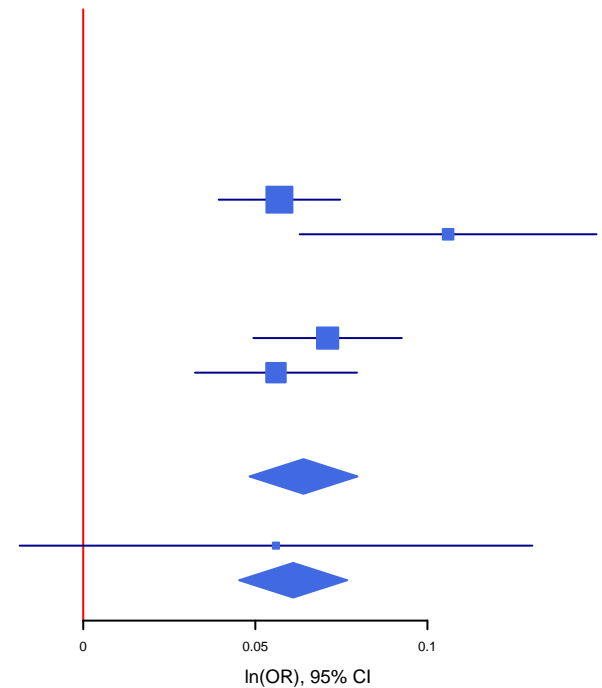

|                                                    |          |             |                 |                     |                      |              |              |
|----------------------------------------------------|----------|-------------|-----------------|---------------------|----------------------|--------------|--------------|
| rs2914983                                          | A/G      |             | 2:198314568     |                     |                      |              |              |
|                                                    | ++       |             | het_P:          |                     | 0.127                | het_I:       | 57.0         |
|                                                    | ngt      | info        | p_value         | f_ca(n)             | f_co(n)              | ln(OR)       | STDerr       |
| PGC_SCZ wave3 eur only                             | 0        | 1.00        | 2.44e-13        | 0.334(53386)        | 0.323(77258)         | 0.067        | 0.009        |
| PGC_SCZ wave3 asn only                             | 0        | 0.97        | 0.00732         | 0.463(14004)        | 0.46(16757)          | 0.047        | 0.017        |
| PGC_SCZ wave2 only                                 | 0        | 1.00        | 5.86e-11        | 0.346(34850)        | 0.332(44347)         | 0.075        | 0.012        |
| PGC_SCZ wave3 (excl. wave2)                        | 0        | 0.99        | 1.19e-05        | 0.376(32540)        | 0.361(49668)         | 0.05         | 0.012        |
| <b>PGC_SCZ wave3 (incl. wave2)</b>                 | <b>0</b> | <b>0.99</b> | <b>1.1e-14</b>  | <b>0.361(67390)</b> | <b>0.347(94015)</b>  | <b>0.063</b> | <b>0.008</b> |
| Decode – Replication                               | 0        | 1.00        | 0.812           | 0.317(1979)         | 0.372(142627)        | 0.05         | 0.04         |
| <b>PGC_SCZ wave3 (incl. wave2 and replication)</b> | <b>0</b> | <b>1.00</b> | <b>2.06e-14</b> | <b>0.36(69369)</b>  | <b>0.362(236642)</b> | <b>0.061</b> | <b>0.008</b> |

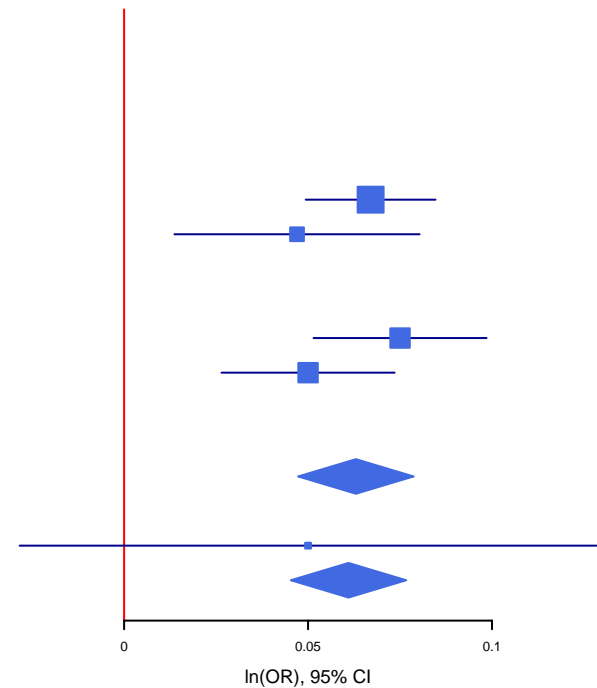

rs5751191

|     |                         |
|-----|-------------------------|
| T/C | 22:42370991             |
| --- | het_P: 0.457 het_I: 0.0 |

|                                             | ngt | info | p_value  | f_ca(n)      | f_co(n)       | ln(OR) | STDerr |
|---------------------------------------------|-----|------|----------|--------------|---------------|--------|--------|
| PGC_SCZ wave3 eur only                      | 48  | 0.99 | 3e-14    | 0.484(53386) | 0.499(77258)  | -0.066 | 0.009  |
| PGC_SCZ wave3 asn only                      | 6   | 0.98 | 0.601    | 0.163(14004) | 0.16(16757)   | -0.012 | 0.023  |
| PGC_SCZ wave2 only                          | 14  | 0.98 | 4.04e-09 | 0.466(34850) | 0.491(44347)  | -0.065 | 0.011  |
| PGC_SCZ wave3 (excl. wave2)                 | 40  | 0.99 | 1.1e-05  | 0.364(32540) | 0.392(49668)  | -0.053 | 0.012  |
| PGC_SCZ wave3 (incl. wave2)                 | 54  | 0.99 | 2.75e-13 | 0.417(67390) | 0.439(94015)  | -0.059 | 0.008  |
| Decode - Replication                        | 0   | 1.00 | 0.0185   | 0.501(1979)  | 0.495(142627) | -0.053 | 0.038  |
| PGC_SCZ wave3 (incl. wave2 and replication) | 54  | 0.99 | 2.18e-14 | 0.419(69369) | 0.473(236642) | -0.061 | 0.008  |

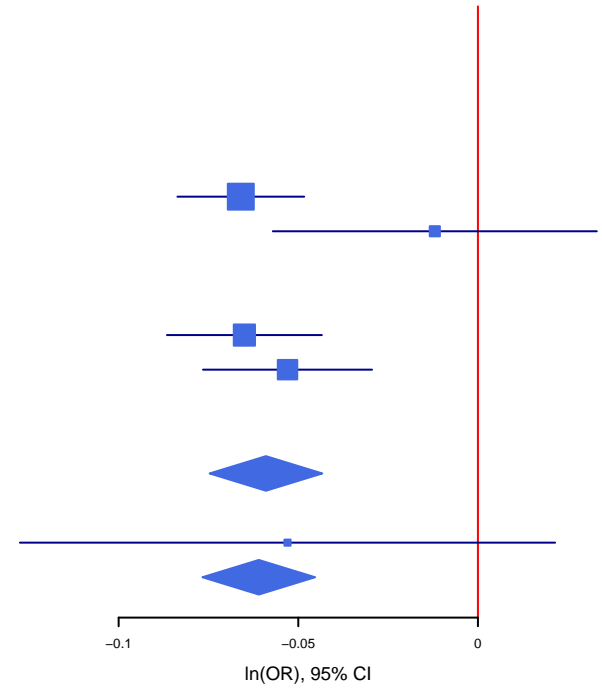

| rs38752                                            | T/G       |             | 7:111078912     |                     |                      |              |              |
|----------------------------------------------------|-----------|-------------|-----------------|---------------------|----------------------|--------------|--------------|
|                                                    | ++        |             | het_P:          | 0.033               | het_I:               | 78.0         |              |
|                                                    | ngt       | info        | p_value         | f_ca(n)             | f_co(n)              | ln(OR)       | STDerr       |
| PGC_SCZ wave3 eur only                             | 22        | 1.00        | 5.46e-12        | 0.664(53386)        | 0.653(77258)         | 0.063        | 0.009        |
| PGC_SCZ wave3 asn only                             | 2         | 0.98        | 0.00443         | 0.392(14004)        | 0.378(16757)         | 0.05         | 0.018        |
| PGC_SCZ wave2 only                                 | 15        | 1.00        | 1.51e-11        | 0.656(34850)        | 0.648(44347)         | 0.077        | 0.012        |
| PGC_SCZ wave3 (excl. wave2)                        | 9         | 1.00        | 0.000161        | 0.556(32540)        | 0.565(49668)         | 0.043        | 0.011        |
| <b>PGC_SCZ wave3 (incl. wave2)</b>                 | <b>24</b> | <b>1.00</b> | <b>1.08e-13</b> | <b>0.608(67390)</b> | <b>0.604(94015)</b>  | <b>0.06</b>  | <b>0.008</b> |
| Decode – Replication                               | 0         | 1.00        | 0.0575          | 0.66(1979)          | 0.7(142627)          | 0.043        | 0.041        |
| <b>PGC_SCZ wave3 (incl. wave2 and replication)</b> | <b>24</b> | <b>1.00</b> | <b>2.24e-14</b> | <b>0.609(69369)</b> | <b>0.662(236642)</b> | <b>0.061</b> | <b>0.008</b> |

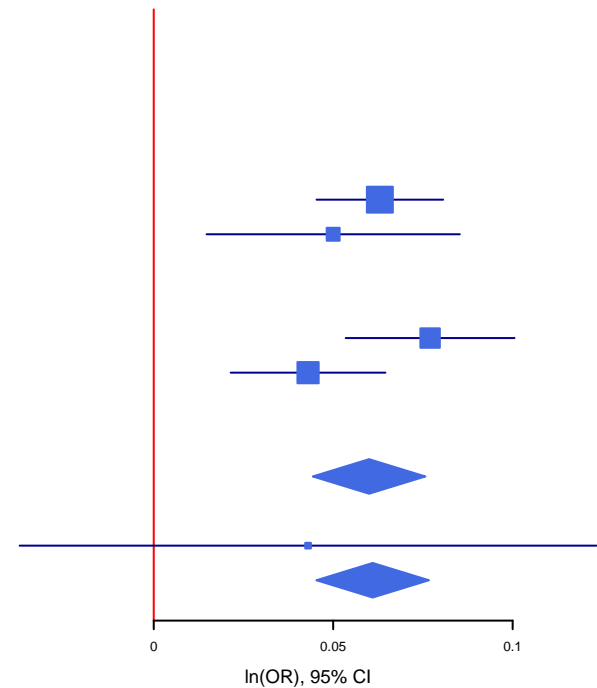

rs12498839                      G/A                      4:176731401

                                         ++                      het\_P:                      0.764                      het\_I:                      0.0

|                                             | ngt | info | p_value  | f_ca(n)      | f_co(n)       | ln(OR) | STDerr |
|---------------------------------------------|-----|------|----------|--------------|---------------|--------|--------|
| PGC_SCZ wave3 eur only                      | 4   | 0.98 | 7.9e-11  | 0.937(52493) | 0.941(75664)  | -0.119 | 0.018  |
| PGC_SCZ wave3 asn only                      | 0   | 0.94 | 0.000262 | 0.898(14004) | 0.906(16757)  | -0.106 | 0.029  |
| PGC_SCZ wave2 only                          | 0   | 0.98 | 1.07e-06 | 0.933(33957) | 0.939(42753)  | -0.11  | 0.023  |
| PGC_SCZ wave3 (excl. wave2)                 | 4   | 0.97 | 1.73e-08 | 0.923(32540) | 0.931(49668)  | -0.12  | 0.021  |
| PGC_SCZ wave3 (incl. wave2)                 | 4   | 0.98 | 9.43e-14 | 0.929(66497) | 0.935(92421)  | -0.115 | 0.016  |
| Decode - Replication                        | 0   | 1.00 | 0.0855   | 0.954(1979)  | 0.949(142627) | -0.12  | 0.087  |
| PGC_SCZ wave3 (incl. wave2 and replication) | 4   | 0.99 | 2.44e-14 | 0.93(68476)  | 0.944(235048) | -0.116 | 0.015  |

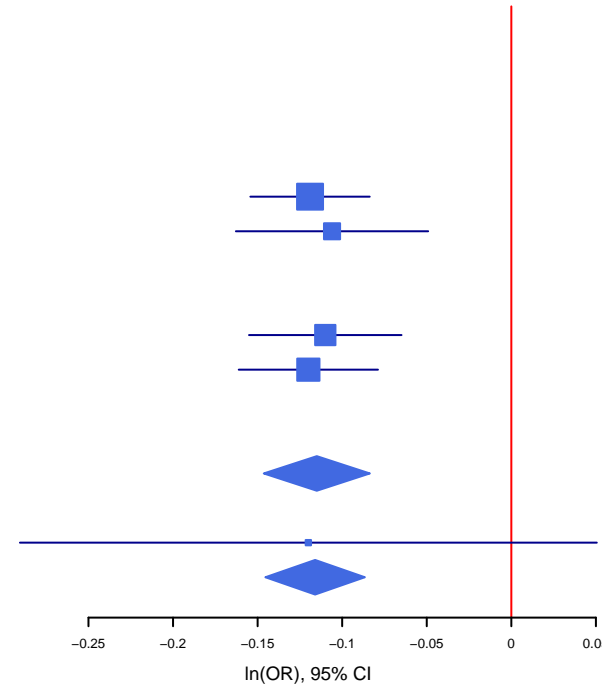

| rs7238071                                          | A/G       |             | 18:77579812     |                     |                      |               |              |
|----------------------------------------------------|-----------|-------------|-----------------|---------------------|----------------------|---------------|--------------|
|                                                    | —         |             | het_P:          | 0.281               | het_I:               | 13.8          |              |
|                                                    | ngt       | info        | p_value         | f_ca(n)             | f_co(n)              | ln(OR)        | STDerr       |
| PGC_SCZ wave3 eur only                             | 19        | 0.99        | 1.74e-10        | 0.713(53386)        | 0.726(77258)         | -0.061        | 0.01         |
| PGC_SCZ wave3 asn only                             | 4         | 0.95        | 0.000114        | 0.572(14004)        | 0.589(16757)         | -0.068        | 0.018        |
| PGC_SCZ wave2 only                                 | 19        | 0.99        | 8.57e-06        | 0.706(34850)        | 0.723(44347)         | -0.054        | 0.012        |
| PGC_SCZ wave3 (excl. wave2)                        | 4         | 0.97        | 1.26e-09        | 0.66(32540)         | 0.683(49668)         | -0.072        | 0.012        |
| <b>PGC_SCZ wave3 (incl. wave2)</b>                 | <b>23</b> | <b>0.98</b> | <b>9.29e-14</b> | <b>0.684(67390)</b> | <b>0.702(94015)</b>  | <b>-0.063</b> | <b>0.008</b> |
| Decode – Replication                               | 0         | 1.00        | 0.31            | 0.714(1979)         | 0.707(142627)        | -0.072        | 0.041        |
| <b>PGC_SCZ wave3 (incl. wave2 and replication)</b> | <b>23</b> | <b>0.99</b> | <b>4.69e-14</b> | <b>0.685(69369)</b> | <b>0.705(236642)</b> | <b>-0.062</b> | <b>0.008</b> |

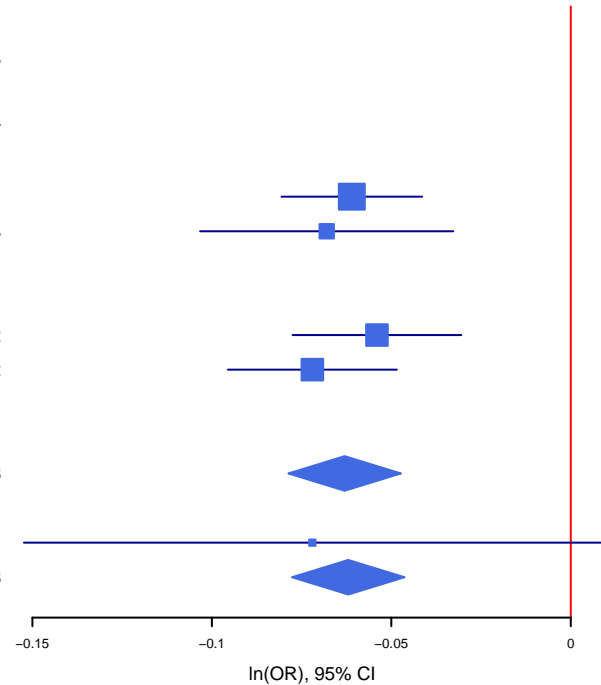



18:53200117

84.7

| ngt | info | p_value | f_ca(n) | f_co(n) | ln(OR) | STDerr |
|-----|------|---------|---------|---------|--------|--------|
|-----|------|---------|---------|---------|--------|--------|

|    |      |          |              |              |       |       |
|----|------|----------|--------------|--------------|-------|-------|
| 21 | 1.00 | 5.12e-16 | 0.506(53386) | 0.529(77258) | -0.07 | 0.009 |
|----|------|----------|--------------|--------------|-------|-------|

|   |      |       |              |              |       |       |
|---|------|-------|--------------|--------------|-------|-------|
| 5 | 0.96 | 0.737 | 0.156(14004) | 0.153(16757) | 0.008 | 0.024 |
|---|------|-------|--------------|--------------|-------|-------|

|    |      |          |              |              |       |       |
|----|------|----------|--------------|--------------|-------|-------|
| 20 | 1.00 | 3.18e-13 | 0.488(34850) | 0.522(44347) | -0.08 | 0.011 |
|----|------|----------|--------------|--------------|-------|-------|

|   |      |         |              |              |        |       |
|---|------|---------|--------------|--------------|--------|-------|
| 6 | 0.98 | 0.00162 | 0.375(32540) | 0.407(49668) | -0.038 | 0.012 |
|---|------|---------|--------------|--------------|--------|-------|

|    |      |          |              |              |        |       |
|----|------|----------|--------------|--------------|--------|-------|
| 26 | 0.99 | 5.72e-14 | 0.433(67390) | 0.462(94015) | -0.061 | 0.008 |
|----|------|----------|--------------|--------------|--------|-------|

|   |      |       |             |               |        |       |
|---|------|-------|-------------|---------------|--------|-------|
| 0 | 1.00 | 0.468 | 0.482(1979) | 0.504(142627) | -0.038 | 0.038 |
|---|------|-------|-------------|---------------|--------|-------|

|    |      |          |              |               |        |       |
|----|------|----------|--------------|---------------|--------|-------|
| 26 | 1.00 | 6.22e-14 | 0.434(69369) | 0.487(236642) | -0.059 | 0.008 |
|----|------|----------|--------------|---------------|--------|-------|

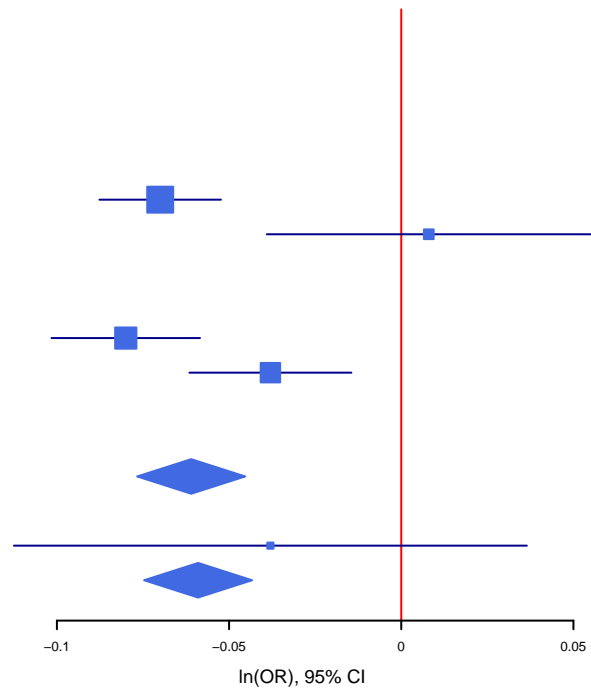

rs75037792

G/A  
++  
12:123716466  
het\_P: 0.967 het\_I: 0.0

|                                             | ngt | info | p_value  | f_ca(n)      | f_co(n)       | ln(OR) | STDerr |
|---------------------------------------------|-----|------|----------|--------------|---------------|--------|--------|
| PGC_SCZ wave3 eur only                      | 0   | 1.00 | 0.00025  | 0.96(53252)  | 0.964(76724)  | -0.082 | 0.022  |
| PGC_SCZ wave3 asn only                      | 0   | 0.99 | 1.29e-11 | 0.699(14004) | 0.723(16757)  | -0.127 | 0.019  |
| PGC_SCZ wave2 only                          | 0   | 1.00 | 3.53e-05 | 0.947(34850) | 0.96(44347)   | -0.11  | 0.026  |
| PGC_SCZ wave3 (excl. wave2)                 | 0   | 0.99 | 2.86e-10 | 0.861(32406) | 0.885(49134)  | -0.108 | 0.017  |
| PGC_SCZ wave3 (incl. wave2)                 | 0   | 1.00 | 4.64e-14 | 0.905(67256) | 0.921(93481)  | -0.109 | 0.014  |
| Decode - Replication                        | 0   | 1.00 | 0.716    | 0.966(1979)  | 0.976(142627) | -0.108 | 0.11   |
| PGC_SCZ wave3 (incl. wave2 and replication) | 0   | 1.00 | 1.09e-13 | 0.907(69235) | 0.954(236108) | -0.106 | 0.014  |

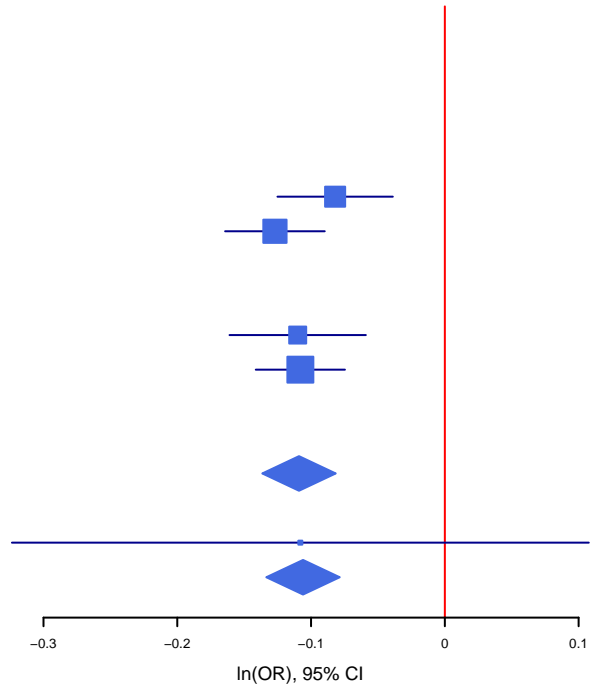

rs715170

C/T

18:53795514

—

het\_P:

0.868

het\_I:

0.0

ngt

info

p\_value

f\_ca(n)

f\_co(n)

ln(OR)

STDerr

PGC\_SCZ wave3 eur only

8

0.99

1.77e-10

0.737(53386)

0.723(77258)

0.062

0.01

PGC\_SCZ wave3 asn only

0

0.94

0.000839

0.84(14004)

0.826(16757)

0.079

0.024

PGC\_SCZ wave2 only

1

0.99

2.87e-07

0.74(34850)

0.721(44347)

0.063

0.012

PGC\_SCZ wave3 (excl. wave2)

7

0.97

5.37e-07

0.777(32540)

0.759(49668)

0.066

0.013

**PGC\_SCZ wave3 (incl. wave2)**

**8**

**0.98**

**7.4e-13**

**0.758(67390)**

**0.741(94015)**

**0.065**

**0.009**

Decode – Replication

0

1.00

0.0971

0.733(1979)

0.769(142627)

0.066

0.044

**PGC\_SCZ wave3 (incl. wave2 and replication)**

**8**

**0.99**

**1.64e-13**

**0.757(69369)**

**0.758(236642)**

**0.065**

**0.009**

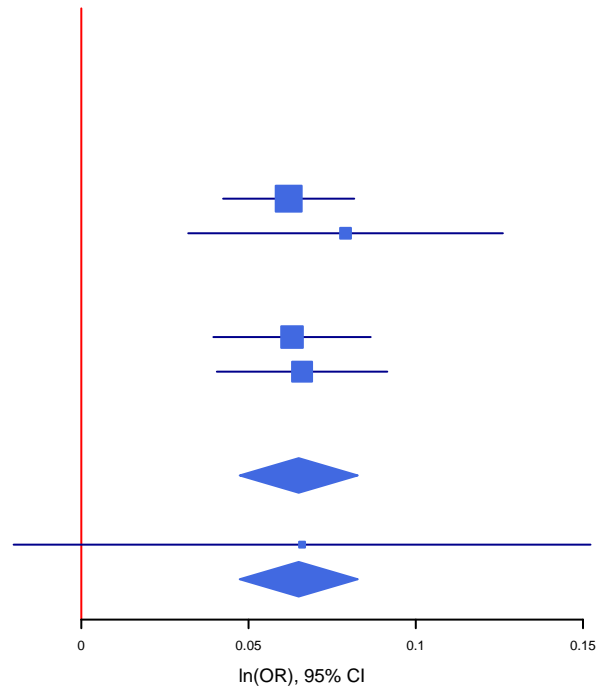

|                                                    |          |             |                 |                     |                      |              |              |
|----------------------------------------------------|----------|-------------|-----------------|---------------------|----------------------|--------------|--------------|
| rs1939514                                          | T/C      |             | 11:132572894    |                     |                      |              |              |
|                                                    | ++       |             | het_P:          |                     | 0.062                | het_I:       | 71.3         |
|                                                    | ngt      | info        | p_value         | f_ca(n)             | f_co(n)              | ln(OR)       | STDerr       |
| PGC_SCZ wave3 eur only                             | 6        | 0.99        | 1.04e-08        | 0.515(53386)        | 0.5(77258)           | 0.05         | 0.009        |
| PGC_SCZ wave3 asn only                             | 0        | 0.96        | 7.17e-06        | 0.566(14004)        | 0.548(16757)         | 0.078        | 0.017        |
| PGC_SCZ wave2 only                                 | 0        | 1.00        | 0.000158        | 0.519(34850)        | 0.507(44347)         | 0.041        | 0.011        |
| PGC_SCZ wave3 (excl. wave2)                        | 6        | 0.98        | 2.62e-10        | 0.534(32540)        | 0.51(49668)          | 0.07         | 0.011        |
| <b>PGC_SCZ wave3 (incl. wave2)</b>                 | <b>6</b> | <b>0.99</b> | <b>1.06e-12</b> | <b>0.526(67390)</b> | <b>0.509(94015)</b>  | <b>0.055</b> | <b>0.008</b> |
| Decode – Replication                               | 0        | 1.00        | 0.0891          | 0.511(1979)         | 0.488(142627)        | 0.07         | 0.038        |
| <b>PGC_SCZ wave3 (incl. wave2 and replication)</b> | <b>6</b> | <b>0.99</b> | <b>1.79e-13</b> | <b>0.526(69369)</b> | <b>0.496(236642)</b> | <b>0.056</b> | <b>0.008</b> |

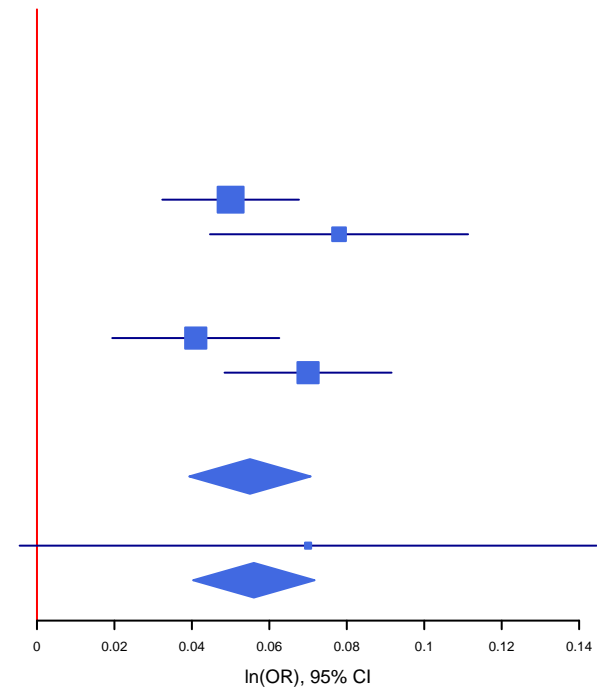

rs10515678

C/T

5:152323236

—

het\_P:

0.059

het\_I:

72.0

| ngt | info | p_value | f_ca(n) | f_co(n) | ln(OR) | STDerr |
|-----|------|---------|---------|---------|--------|--------|
|-----|------|---------|---------|---------|--------|--------|

PGC\_SCZ wave3 eur only

|   |      |          |              |              |       |      |
|---|------|----------|--------------|--------------|-------|------|
| 8 | 0.99 | 8.75e-13 | 0.724(53386) | 0.706(77258) | 0.068 | 0.01 |
|---|------|----------|--------------|--------------|-------|------|

PGC\_SCZ wave3 asn only

|   |      |       |              |              |       |       |
|---|------|-------|--------------|--------------|-------|-------|
| 0 | 0.79 | 0.248 | 0.979(13457) | 0.981(16217) | -0.08 | 0.069 |
|---|------|-------|--------------|--------------|-------|-------|

PGC\_SCZ wave2 only

|   |      |          |              |             |      |       |
|---|------|----------|--------------|-------------|------|-------|
| 1 | 0.99 | 5.18e-11 | 0.735(34850) | 0.71(44347) | 0.08 | 0.012 |
|---|------|----------|--------------|-------------|------|-------|

PGC\_SCZ wave3 (excl. wave2)

|   |      |         |             |              |       |       |
|---|------|---------|-------------|--------------|-------|-------|
| 7 | 0.93 | 0.00381 | 0.82(31993) | 0.794(49128) | 0.044 | 0.015 |
|---|------|---------|-------------|--------------|-------|-------|

**PGC\_SCZ wave3 (incl. wave2)**

|          |             |                 |                     |                     |              |             |
|----------|-------------|-----------------|---------------------|---------------------|--------------|-------------|
| <b>8</b> | <b>0.96</b> | <b>4.46e-12</b> | <b>0.775(66843)</b> | <b>0.754(93475)</b> | <b>0.066</b> | <b>0.01</b> |
|----------|-------------|-----------------|---------------------|---------------------|--------------|-------------|

Decode – Replication

|   |      |        |             |               |       |       |
|---|------|--------|-------------|---------------|-------|-------|
| 0 | 1.00 | 0.0103 | 0.723(1979) | 0.709(142627) | 0.044 | 0.043 |
|---|------|--------|-------------|---------------|-------|-------|

**PGC\_SCZ wave3 (incl. wave2 and replication)**

|          |             |                 |                     |                      |              |              |
|----------|-------------|-----------------|---------------------|----------------------|--------------|--------------|
| <b>8</b> | <b>0.98</b> | <b>2.69e-13</b> | <b>0.773(68822)</b> | <b>0.727(236102)</b> | <b>0.068</b> | <b>0.009</b> |
|----------|-------------|-----------------|---------------------|----------------------|--------------|--------------|

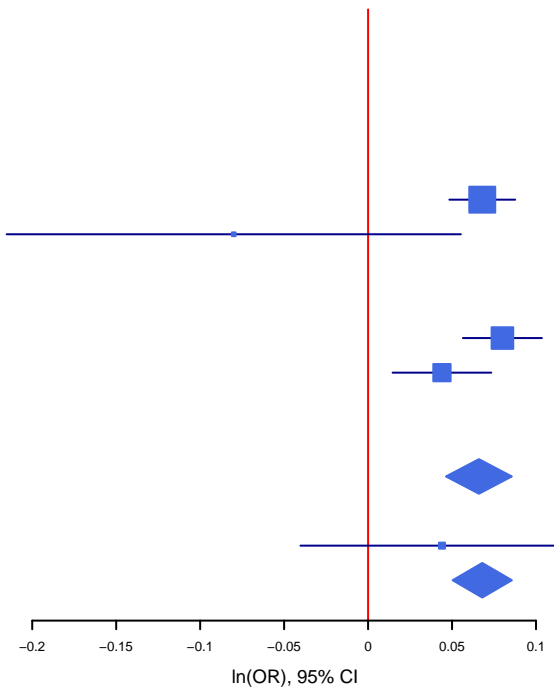

rs13016542

T/C  
++  
2:145183851  
het\_P: 0.948 het\_I: 0.0

|                                             | ngt | info | p_value  | f_ca(n)      | f_co(n)       | ln(OR) | STDerr |
|---------------------------------------------|-----|------|----------|--------------|---------------|--------|--------|
| PGC_SCZ wave3 eur only                      | 30  | 0.98 | 8.28e-12 | 0.876(53386) | 0.864(77258)  | 0.088  | 0.013  |
| PGC_SCZ wave3 asn only                      | 4   | 0.94 | 0.131    | 0.947(14004) | 0.945(16757)  | 0.059  | 0.039  |
| PGC_SCZ wave2 only                          | 1   | 0.98 | 1.51e-07 | 0.878(34850) | 0.865(44347)  | 0.086  | 0.016  |
| PGC_SCZ wave3 (excl. wave2)                 | 33  | 0.97 | 4.85e-06 | 0.904(32540) | 0.89(49668)   | 0.084  | 0.018  |
| PGC_SCZ wave3 (incl. wave2)                 | 34  | 0.98 | 3.35e-12 | 0.891(67390) | 0.878(94015)  | 0.085  | 0.012  |
| Decode – Replication                        | 0   | 1.00 | 0.0162   | 0.854(1979)  | 0.835(142627) | 0.084  | 0.054  |
| PGC_SCZ wave3 (incl. wave2 and replication) | 34  | 0.99 | 2.84e-13 | 0.89(69369)  | 0.852(236642) | 0.088  | 0.012  |

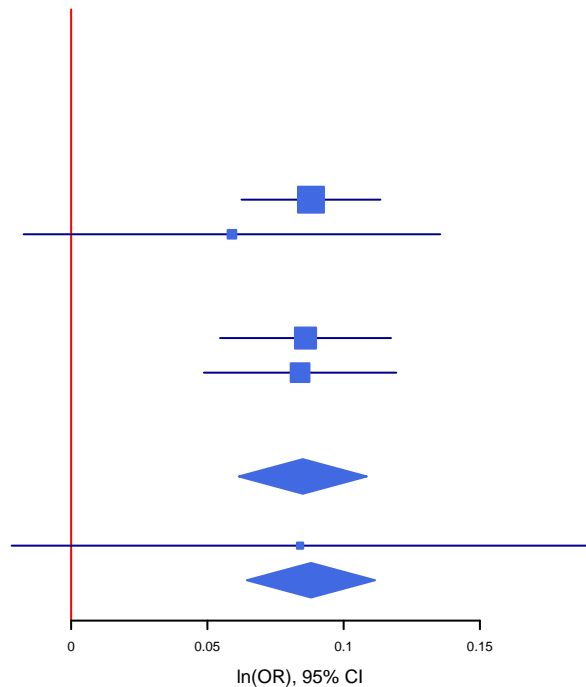

15:61872197

—

het P:

0.52

het l:

0.0

| ngt | info | p_value | f_ca(n) | f_co(n) | ln(OR) | STDerr |
|-----|------|---------|---------|---------|--------|--------|
|-----|------|---------|---------|---------|--------|--------|

|                        |   |      |          |              |              |        |       |
|------------------------|---|------|----------|--------------|--------------|--------|-------|
| PGC_SCZ wave3 eur only | 6 | 1.00 | 2.21e-13 | 0.439(53386) | 0.456(77258) | -0.064 | 0.009 |
|------------------------|---|------|----------|--------------|--------------|--------|-------|

|                        |   |      |       |              |              |        |       |
|------------------------|---|------|-------|--------------|--------------|--------|-------|
| PGC_SCZ wave3 asn only | 0 | 0.98 | 0.132 | 0.691(14004) | 0.705(16757) | -0.028 | 0.019 |
|------------------------|---|------|-------|--------------|--------------|--------|-------|

|                    |   |      |          |              |              |        |       |
|--------------------|---|------|----------|--------------|--------------|--------|-------|
| PGC_SCZ wave2 only | 0 | 1.00 | 1.22e-08 | 0.454(34850) | 0.462(44347) | -0.062 | 0.011 |
|--------------------|---|------|----------|--------------|--------------|--------|-------|

|                             |   |      |          |              |              |        |       |
|-----------------------------|---|------|----------|--------------|--------------|--------|-------|
| PGC_SCZ wave3 (excl. wave2) | 6 | 0.99 | 4.39e-06 | 0.531(32540) | 0.534(49668) | -0.052 | 0.011 |
|-----------------------------|---|------|----------|--------------|--------------|--------|-------|

|                             |   |      |          |              |            |        |       |
|-----------------------------|---|------|----------|--------------|------------|--------|-------|
| PGC_SCZ wave3 (incl. wave2) | 6 | 0.99 | 3.13e-13 | 0.491(67390) | 0.5(94015) | -0.057 | 0.008 |
|-----------------------------|---|------|----------|--------------|------------|--------|-------|

|                      |   |      |       |             |               |        |       |
|----------------------|---|------|-------|-------------|---------------|--------|-------|
| Decode – Replication | 0 | 1.00 | 0.312 | 0.454(1979) | 0.462(142627) | −0.052 | 0.034 |
|----------------------|---|------|-------|-------------|---------------|--------|-------|

|                                             |   |      |          |             |               |        |       |
|---------------------------------------------|---|------|----------|-------------|---------------|--------|-------|
| PGC_SCZ wave3 (incl. wave2 and replication) | 6 | 1.00 | 2.98e-13 | 0.49(69369) | 0.477(236642) | -0.056 | 0.008 |
|---------------------------------------------|---|------|----------|-------------|---------------|--------|-------|

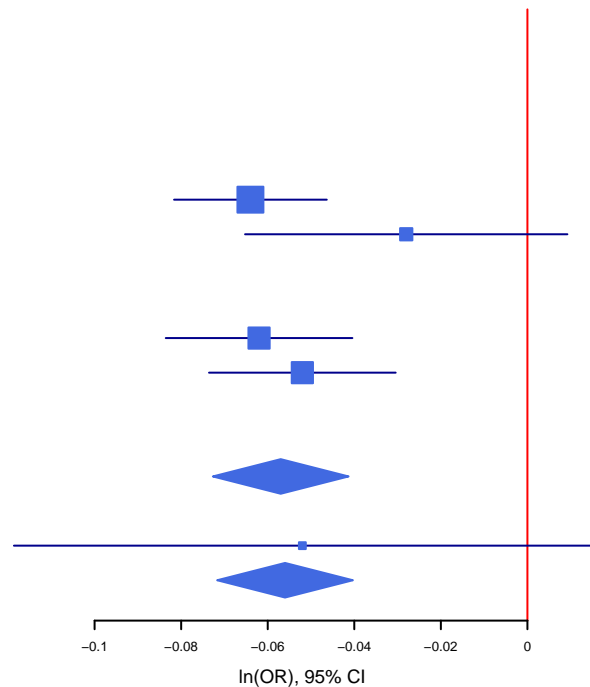

| rs73229090                                         | C/A      |             | 8:27442127      |                     |                      |              |              |
|----------------------------------------------------|----------|-------------|-----------------|---------------------|----------------------|--------------|--------------|
|                                                    | --       |             | het_P:          |                     | 0.551                | het_I:       | 0.0          |
|                                                    | ngt      | info        | p_value         | f_ca(n)             | f_co(n)              | ln(OR)       | STDerr       |
| PGC_SCZ wave3 eur only                             | 7        | 0.96        | 4.34e-13        | 0.897(53386)        | 0.888(77258)         | 0.103        | 0.014        |
| PGC_SCZ wave3 asn only                             | nan      | nan         | nan             | nan(nan)            | nan(nan)             | nan          | nan          |
| PGC_SCZ wave2 only                                 | 0        | 0.96        | 1.26e-07        | 0.896(32998)        | 0.887(43387)         | 0.096        | 0.018        |
| PGC_SCZ wave3 (excl. wave2)                        | 7        | 0.97        | 6.01e-07        | 0.898(20388)        | 0.889(33871)         | 0.113        | 0.023        |
| <b>PGC_SCZ wave3 (incl. wave2)</b>                 | <b>7</b> | <b>0.96</b> | <b>4.34e-13</b> | <b>0.897(53386)</b> | <b>0.888(77258)</b>  | <b>0.103</b> | <b>0.014</b> |
| Decode – Replication                               | 0        | 1.00        | 0.281           | 0.896(1979)         | 0.896(142627)        | 0.113        | 0.064        |
| <b>PGC_SCZ wave3 (incl. wave2 and replication)</b> | <b>7</b> | <b>0.99</b> | <b>3.15e-13</b> | <b>0.897(55365)</b> | <b>0.893(219885)</b> | <b>0.101</b> | <b>0.014</b> |

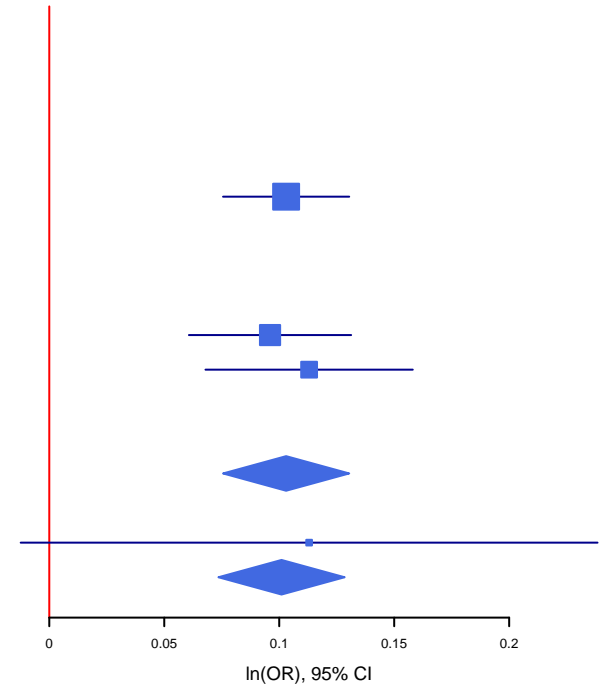



rs732381

A/T

22:40051166

—

het\_P:

0.254

het\_I:

23.1

|  | ngt | info | p_value | f_ca(n) | f_co(n) | ln(OR) | STDerr |
|--|-----|------|---------|---------|---------|--------|--------|
|--|-----|------|---------|---------|---------|--------|--------|

PGC\_SCZ wave3 eur only

|    |      |          |              |              |        |       |
|----|------|----------|--------------|--------------|--------|-------|
| 12 | 0.98 | 1.29e-10 | 0.686(53386) | 0.699(77258) | -0.061 | 0.009 |
|----|------|----------|--------------|--------------|--------|-------|

PGC\_SCZ wave3 asn only

|   |      |         |              |              |        |      |
|---|------|---------|--------------|--------------|--------|------|
| 1 | 0.80 | 0.00805 | 0.079(14004) | 0.075(16757) | -0.106 | 0.04 |
|---|------|---------|--------------|--------------|--------|------|

PGC\_SCZ wave2 only

|    |      |          |              |              |        |       |
|----|------|----------|--------------|--------------|--------|-------|
| 11 | 0.97 | 2.33e-09 | 0.649(34850) | 0.683(44347) | -0.072 | 0.012 |
|----|------|----------|--------------|--------------|--------|-------|

PGC\_SCZ wave3 (excl. wave2)

|   |      |          |              |              |        |       |
|---|------|----------|--------------|--------------|--------|-------|
| 2 | 0.92 | 0.000361 | 0.465(32540) | 0.503(49668) | -0.051 | 0.014 |
|---|------|----------|--------------|--------------|--------|-------|

PGC\_SCZ wave3 (incl. wave2)

|    |      |          |             |              |        |       |
|----|------|----------|-------------|--------------|--------|-------|
| 13 | 0.94 | 6.69e-12 | 0.56(67390) | 0.588(94015) | -0.063 | 0.009 |
|----|------|----------|-------------|--------------|--------|-------|

Decode – Replication

|   |      |         |             |              |        |       |
|---|------|---------|-------------|--------------|--------|-------|
| 0 | 1.00 | 0.00688 | 0.719(1979) | 0.73(142627) | -0.051 | 0.042 |
|---|------|---------|-------------|--------------|--------|-------|

PGC\_SCZ wave3 (incl. wave2 and replication)

|    |      |          |              |               |        |       |
|----|------|----------|--------------|---------------|--------|-------|
| 13 | 0.98 | 3.36e-13 | 0.565(69369) | 0.673(236642) | -0.065 | 0.009 |
|----|------|----------|--------------|---------------|--------|-------|

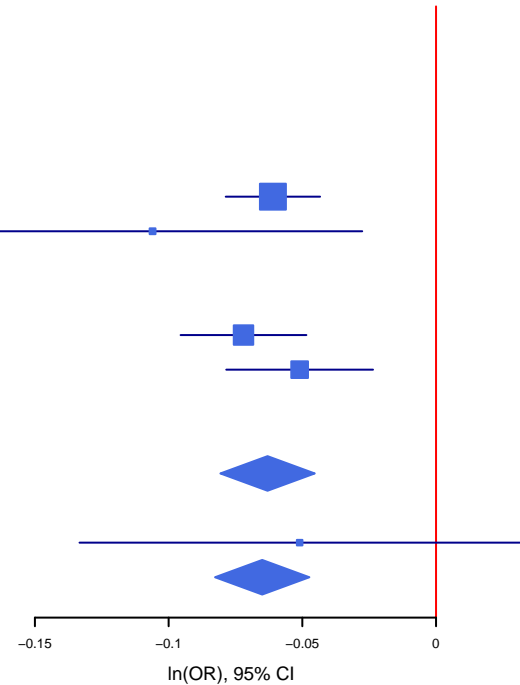

rs74914300

T/G

18:53010348

---

het\_P:

0.968

het\_I:

0.0

| ngt | info | p_value | f_ca(n) | f_co(n) | ln(OR) | STDerr |
|-----|------|---------|---------|---------|--------|--------|
|-----|------|---------|---------|---------|--------|--------|

PGC\_SCZ wave3 eur only

|   |      |          |              |              |       |       |
|---|------|----------|--------------|--------------|-------|-------|
| 0 | 0.99 | 3.95e-13 | 0.957(53386) | 0.963(77258) | -0.16 | 0.022 |
|---|------|----------|--------------|--------------|-------|-------|

PGC\_SCZ wave3 asn only

|     |     |     |          |          |     |     |
|-----|-----|-----|----------|----------|-----|-----|
| nan | nan | nan | nan(nan) | nan(nan) | nan | nan |
|-----|-----|-----|----------|----------|-----|-----|

PGC\_SCZ wave2 only

|   |      |          |              |              |        |       |
|---|------|----------|--------------|--------------|--------|-------|
| 0 | 0.99 | 1.63e-08 | 0.957(32998) | 0.963(43387) | -0.161 | 0.028 |
|---|------|----------|--------------|--------------|--------|-------|

PGC\_SCZ wave3 (excl. wave2)

|   |      |          |              |              |        |       |
|---|------|----------|--------------|--------------|--------|-------|
| 0 | 1.00 | 5.15e-06 | 0.956(20388) | 0.963(33871) | -0.159 | 0.035 |
|---|------|----------|--------------|--------------|--------|-------|

PGC\_SCZ wave3 (incl. wave2)

|   |      |          |              |              |       |       |
|---|------|----------|--------------|--------------|-------|-------|
| 0 | 0.99 | 3.95e-13 | 0.957(53386) | 0.963(77258) | -0.16 | 0.022 |
|---|------|----------|--------------|--------------|-------|-------|

Decode - Replication

|   |      |       |             |              |        |       |
|---|------|-------|-------------|--------------|--------|-------|
| 0 | 1.00 | 0.468 | 0.967(1979) | 0.97(142627) | -0.159 | 0.099 |
|---|------|-------|-------------|--------------|--------|-------|

PGC\_SCZ wave3 (incl. wave2 and replication)

|   |      |          |              |               |        |       |
|---|------|----------|--------------|---------------|--------|-------|
| 0 | 1.00 | 3.96e-13 | 0.957(55365) | 0.967(219885) | -0.156 | 0.022 |
|---|------|----------|--------------|---------------|--------|-------|

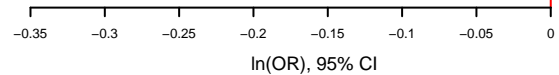

| rs9607782                                          | T/A      |             | 22:41587556     |                     |                      |               |             |
|----------------------------------------------------|----------|-------------|-----------------|---------------------|----------------------|---------------|-------------|
|                                                    | ++       |             | het_P:          |                     | 0.062                | het_I:        | 71.2        |
|                                                    | ngt      | info        | p_value         | f_ca(n)             | f_co(n)              | ln(OR)        | STDerr      |
| PGC_SCZ wave3 eur only                             | 0        | 0.98        | 4.97e-14        | 0.741(53386)        | 0.754(77258)         | -0.076        | 0.01        |
| PGC_SCZ wave3 asn only                             | 0        | 0.85        | 0.414           | 0.933(14004)        | 0.934(16757)         | -0.03         | 0.037       |
| PGC_SCZ wave2 only                                 | 0        | 0.98        | 5.32e-12        | 0.748(34850)        | 0.759(44347)         | -0.088        | 0.013       |
| PGC_SCZ wave3 (excl. wave2)                        | 0        | 0.94        | 0.000549        | 0.816(32540)        | 0.811(49668)         | -0.051        | 0.015       |
| <b>PGC_SCZ wave3 (incl. wave2)</b>                 | <b>0</b> | <b>0.95</b> | <b>7.1e-14</b>  | <b>0.781(67390)</b> | <b>0.786(94015)</b>  | <b>-0.072</b> | <b>0.01</b> |
| Decode – Replication                               | 0        | 1.00        | 0.777           | 0.755(1979)         | 0.725(142627)        | -0.051        | 0.043       |
| <b>PGC_SCZ wave3 (incl. wave2 and replication)</b> | <b>0</b> | <b>0.98</b> | <b>4.81e-13</b> | <b>0.78(69369)</b>  | <b>0.749(236642)</b> | <b>-0.068</b> | <b>0.01</b> |

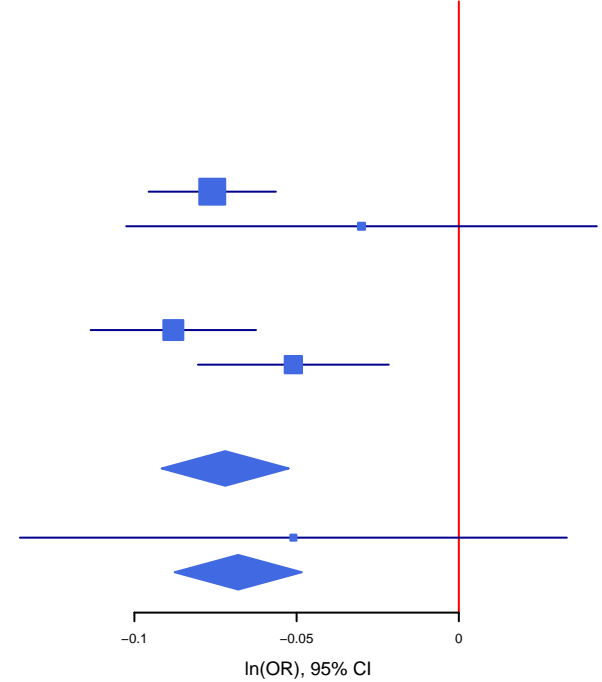

rs17731

G/A

10:3821561

++

het\_P:

0.103

het\_I:

62.4

|  | ngt | info | p_value | f_ca(n) | f_co(n) | ln(OR) | STDerr |
|--|-----|------|---------|---------|---------|--------|--------|
|--|-----|------|---------|---------|---------|--------|--------|

PGC\_SCZ wave3 eur only

|    |      |          |             |              |        |       |
|----|------|----------|-------------|--------------|--------|-------|
| 24 | 0.99 | 4.37e-09 | 0.62(53386) | 0.635(77258) | -0.052 | 0.009 |
|----|------|----------|-------------|--------------|--------|-------|

PGC\_SCZ wave3 asn only

|   |      |         |              |             |        |       |
|---|------|---------|--------------|-------------|--------|-------|
| 5 | 1.00 | 8.7e-06 | 0.488(14004) | 0.51(16757) | -0.076 | 0.017 |
|---|------|---------|--------------|-------------|--------|-------|

PGC\_SCZ wave2 only

|    |      |          |              |              |        |       |
|----|------|----------|--------------|--------------|--------|-------|
| 23 | 0.99 | 7.41e-05 | 0.614(34850) | 0.634(44347) | -0.044 | 0.011 |
|----|------|----------|--------------|--------------|--------|-------|

PGC\_SCZ wave3 (excl. wave2)

|   |      |          |              |              |       |       |
|---|------|----------|--------------|--------------|-------|-------|
| 6 | 0.99 | 2.98e-10 | 0.569(32540) | 0.594(49668) | -0.07 | 0.011 |
|---|------|----------|--------------|--------------|-------|-------|

PGC\_SCZ wave3 (incl. wave2)

|    |      |          |              |              |        |       |
|----|------|----------|--------------|--------------|--------|-------|
| 29 | 0.99 | 3.76e-13 | 0.592(67390) | 0.613(94015) | -0.058 | 0.008 |
|----|------|----------|--------------|--------------|--------|-------|

Decode - Replication

|   |      |       |           |               |       |       |
|---|------|-------|-----------|---------------|-------|-------|
| 0 | 1.00 | 0.697 | 0.6(1979) | 0.631(142627) | -0.07 | 0.039 |
|---|------|-------|-----------|---------------|-------|-------|

PGC\_SCZ wave3 (incl. wave2 and replication)

|    |      |          |              |               |        |       |
|----|------|----------|--------------|---------------|--------|-------|
| 29 | 0.99 | 5.57e-13 | 0.592(69369) | 0.624(236642) | -0.056 | 0.008 |
|----|------|----------|--------------|---------------|--------|-------|

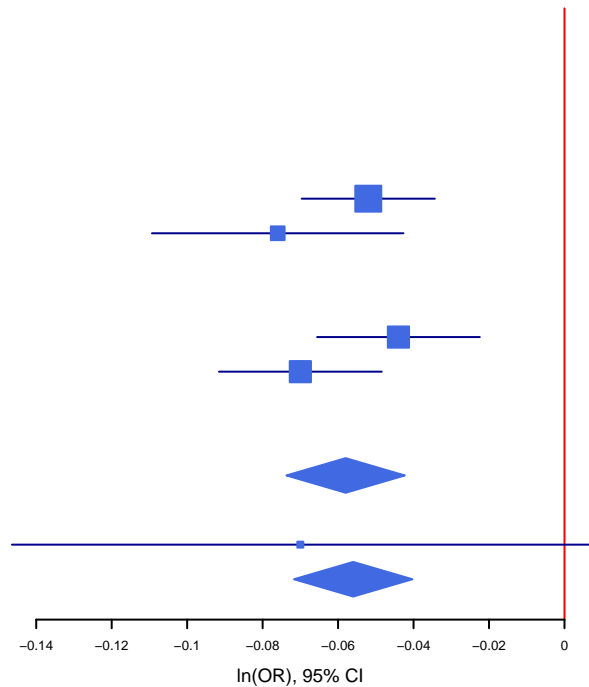

rs177001

A/G

5:152610561

—

het\_P:

0.456

het\_I:

0.0

|  | ngt | info | p_value | f_ca(n) | f_co(n) | ln(OR) | STDerr |
|--|-----|------|---------|---------|---------|--------|--------|
|--|-----|------|---------|---------|---------|--------|--------|

PGC\_SCZ wave3 eur only

|    |      |          |              |              |        |       |
|----|------|----------|--------------|--------------|--------|-------|
| 16 | 1.00 | 5.09e-10 | 0.489(53386) | 0.506(77258) | -0.053 | 0.009 |
|----|------|----------|--------------|--------------|--------|-------|

PGC\_SCZ wave3 asn only

|   |      |         |              |              |       |       |
|---|------|---------|--------------|--------------|-------|-------|
| 3 | 0.97 | 0.00398 | 0.572(14004) | 0.583(16757) | -0.05 | 0.018 |
|---|------|---------|--------------|--------------|-------|-------|

PGC\_SCZ wave2 only

|    |      |          |              |              |        |       |
|----|------|----------|--------------|--------------|--------|-------|
| 16 | 1.00 | 6.33e-08 | 0.497(34850) | 0.512(44347) | -0.058 | 0.011 |
|----|------|----------|--------------|--------------|--------|-------|

PGC\_SCZ wave3 (excl. wave2)

|   |      |          |              |              |        |       |
|---|------|----------|--------------|--------------|--------|-------|
| 3 | 0.98 | 1.99e-05 | 0.516(32540) | 0.527(49668) | -0.047 | 0.011 |
|---|------|----------|--------------|--------------|--------|-------|

PGC\_SCZ wave3 (incl. wave2)

|    |      |          |              |             |        |       |
|----|------|----------|--------------|-------------|--------|-------|
| 19 | 0.99 | 7.44e-12 | 0.506(67390) | 0.52(94015) | -0.053 | 0.008 |
|----|------|----------|--------------|-------------|--------|-------|

Decode – Replication

|   |      |        |             |               |        |       |
|---|------|--------|-------------|---------------|--------|-------|
| 0 | 1.00 | 0.0177 | 0.505(1979) | 0.487(142627) | -0.047 | 0.038 |
|---|------|--------|-------------|---------------|--------|-------|

PGC\_SCZ wave3 (incl. wave2 and replication)

|    |      |         |              |             |        |       |
|----|------|---------|--------------|-------------|--------|-------|
| 19 | 1.00 | 5.8e-13 | 0.506(69369) | 0.5(236642) | -0.054 | 0.008 |
|----|------|---------|--------------|-------------|--------|-------|

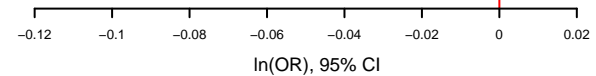

rs12883788

|     |                         |
|-----|-------------------------|
| C/T | 14:33303540             |
| ++  | het_P: 0.915 het_I: 0.0 |

|                                             | ngt | info | p_value  | f_ca(n)      | f_co(n)       | ln(OR) | STDerr |
|---------------------------------------------|-----|------|----------|--------------|---------------|--------|--------|
| PGC_SCZ wave3 eur only                      | 0   | 0.98 | 1.86e-12 | 0.527(53386) | 0.542(77258)  | -0.061 | 0.009  |
| PGC_SCZ wave3 asn only                      | 0   | 0.94 | 0.332    | 0.7(14004)   | 0.705(16757)  | -0.019 | 0.02   |
| PGC_SCZ wave2 only                          | 0   | 0.99 | 5.11e-07 | 0.538(34850) | 0.544(44347)  | -0.055 | 0.011  |
| PGC_SCZ wave3 (excl. wave2)                 | 0   | 0.96 | 3.63e-06 | 0.59(32540)  | 0.595(49668)  | -0.053 | 0.012  |
| PGC_SCZ wave3 (incl. wave2)                 | 0   | 0.97 | 8.43e-12 | 0.563(67390) | 0.571(94015)  | -0.054 | 0.008  |
| Decode - Replication                        | 0   | 1.00 | 0.0336   | 0.521(1979)  | 0.51(142627)  | -0.053 | 0.038  |
| PGC_SCZ wave3 (incl. wave2 and replication) | 0   | 0.99 | 7.92e-13 | 0.562(69369) | 0.534(236642) | -0.055 | 0.008  |

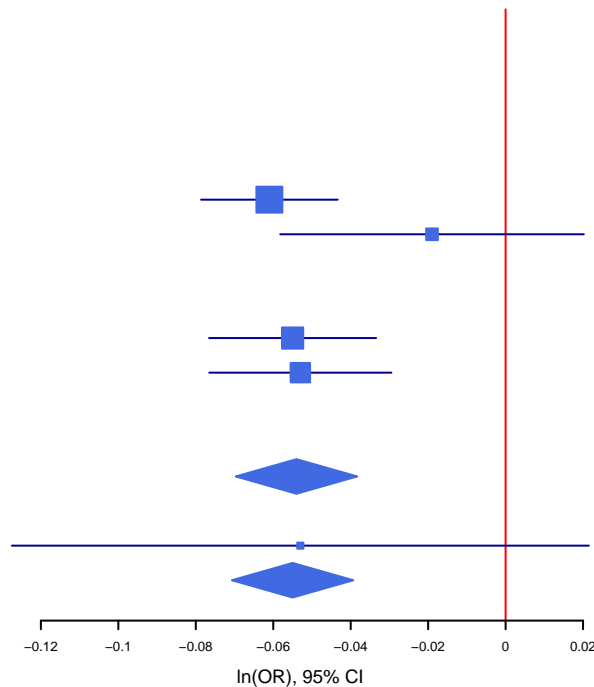

| rs9545047                                          | A/C      |             | 13:79859456     |                     |                     |              |              |
|----------------------------------------------------|----------|-------------|-----------------|---------------------|---------------------|--------------|--------------|
|                                                    | ++       |             | het_P:          | 0.951               | het_I:              | 0.0          |              |
|                                                    | ngt      | info        | p_value         | f_ca(n)             | f_co(n)             | ln(OR)       | STDerr       |
| PGC_SCZ wave3 eur only                             | 0        | 0.98        | 5.53e-12        | 0.616(53386)        | 0.602(77258)        | 0.061        | 0.009        |
| PGC_SCZ wave3 asn only                             | 0        | 0.98        | 0.377           | 0.743(14004)        | 0.739(16757)        | 0.017        | 0.02         |
| PGC_SCZ wave2 only                                 | 0        | 0.99        | 1.8e-06         | 0.622(34850)        | 0.605(44347)        | 0.053        | 0.011        |
| PGC_SCZ wave3 (excl. wave2)                        | 0        | 0.97        | 3.82e-06        | 0.664(32540)        | 0.645(49668)        | 0.054        | 0.012        |
| <b>PGC_SCZ wave3 (incl. wave2)</b>                 | <b>0</b> | <b>0.98</b> | <b>3.05e-11</b> | <b>0.642(67390)</b> | <b>0.626(94015)</b> | <b>0.054</b> | <b>0.008</b> |
| Decode – Replication                               | 0        | 1.00        | 0.00141         | 0.604(1979)         | 0.599(142627)       | 0.054        | 0.039        |
| <b>PGC_SCZ wave3 (incl. wave2 and replication)</b> | <b>0</b> | <b>0.99</b> | <b>8.52e-13</b> | <b>0.641(69369)</b> | <b>0.61(236642)</b> | <b>0.057</b> | <b>0.008</b> |

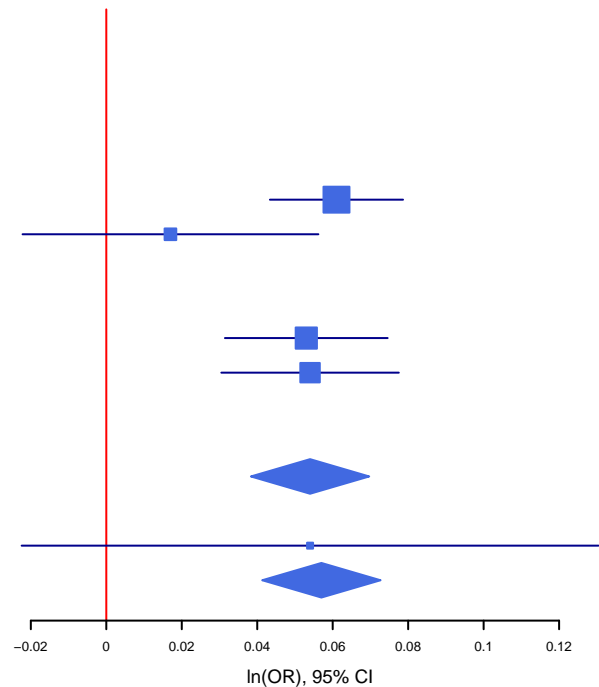

rs17194490

G/T

3:2547786

++

het\_P:

0.091

het\_I:

65.0

|                        | ngt | info | p_value | f_ca(n)      | f_co(n)      | ln(OR) | STDerr |
|------------------------|-----|------|---------|--------------|--------------|--------|--------|
| PGC_SCZ wave3 eur only | 21  | 0.98 | 1.8e-11 | 0.827(53386) | 0.839(77258) | -0.078 | 0.012  |
| PGC_SCZ wave3 asn only | nan | nan  | nan     | nan(nan)     | nan(nan)     | nan    | nan    |

|                             |    |      |          |              |              |        |       |
|-----------------------------|----|------|----------|--------------|--------------|--------|-------|
| PGC_SCZ wave2 only          | 13 | 0.98 | 3.51e-10 | 0.828(32998) | 0.842(43387) | -0.094 | 0.015 |
| PGC_SCZ wave3 (excl. wave2) | 8  | 0.96 | 0.00334  | 0.838(21953) | 0.842(35414) | -0.054 | 0.018 |

|                                                    |           |             |                 |                     |                      |               |              |
|----------------------------------------------------|-----------|-------------|-----------------|---------------------|----------------------|---------------|--------------|
| <b>PGC_SCZ wave3 (incl. wave2)</b>                 | <b>21</b> | <b>0.97</b> | <b>1.85e-11</b> | <b>0.832(54951)</b> | <b>0.842(78801)</b>  | <b>-0.078</b> | <b>0.012</b> |
| Decode – Replication                               | 0         | 1.00        | 0.00914         | 0.837(1979)         | 0.862(142627)        | -0.054        | 0.052        |
| <b>PGC_SCZ wave3 (incl. wave2 and replication)</b> | <b>21</b> | <b>0.99</b> | <b>9.29e-13</b> | <b>0.832(56930)</b> | <b>0.855(221428)</b> | <b>-0.081</b> | <b>0.011</b> |

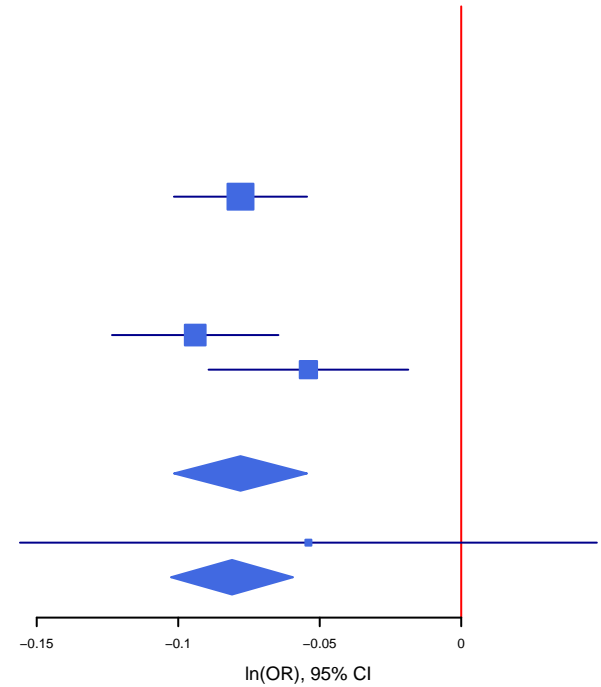



1:2373168

—

het\_P:

0.903

het\_l:

0.0

| ngt | info | p_value | f_ca(n) | f_co(n) | ln(OR) | STDerr |
|-----|------|---------|---------|---------|--------|--------|
|-----|------|---------|---------|---------|--------|--------|

PGC\_SCZ wave3 eur only

|   |      |          |              |              |        |       |
|---|------|----------|--------------|--------------|--------|-------|
| 0 | 0.90 | 7.19e-12 | 0.492(53386) | 0.505(77258) | -0.062 | 0.009 |
|---|------|----------|--------------|--------------|--------|-------|

PGC\_SCZ wave3 asn only

|   |      |        |              |              |       |       |
|---|------|--------|--------------|--------------|-------|-------|
| 0 | 0.77 | 0.0602 | 0.177(14004) | 0.194(16757) | -0.05 | 0.026 |
|---|------|--------|--------------|--------------|-------|-------|

PGC\_SCZ wave2 only

|   |      |          |              |              |       |       |
|---|------|----------|--------------|--------------|-------|-------|
| 0 | 0.86 | 3.95e-07 | 0.472(34850) | 0.496(44347) | -0.06 | 0.012 |
|---|------|----------|--------------|--------------|-------|-------|

PGC\_SCZ wave3 (excl. wave2)

|   |      |          |              |              |        |       |
|---|------|----------|--------------|--------------|--------|-------|
| 0 | 0.89 | 7.08e-07 | 0.378(32540) | 0.409(49668) | -0.062 | 0.012 |
|---|------|----------|--------------|--------------|--------|-------|

PGC\_SCZ wave3 (incl. wave2)

|   |      |          |              |             |        |       |
|---|------|----------|--------------|-------------|--------|-------|
| 0 | 0.88 | 1.32e-12 | 0.427(67390) | 0.45(94015) | -0.061 | 0.009 |
|---|------|----------|--------------|-------------|--------|-------|

## Decode – Replication

|   |      |       |             |               |        |       |
|---|------|-------|-------------|---------------|--------|-------|
| 0 | 1.00 | 0.495 | 0.495(1979) | 0.481(142627) | -0.062 | 0.039 |
|---|------|-------|-------------|---------------|--------|-------|

PGC\_SCZ wave3 (incl. wave2 and replication)

|   |      |         |              |               |        |       |
|---|------|---------|--------------|---------------|--------|-------|
| 0 | 0.95 | 1.5e-12 | 0.429(69369) | 0.469(236642) | -0.059 | 0.008 |
|---|------|---------|--------------|---------------|--------|-------|

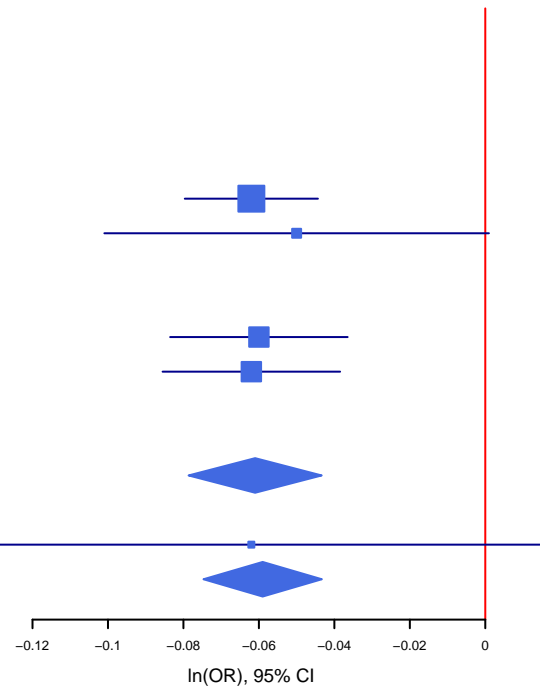

rs8055219                      G/A                      16:13753384

                                         ++                      het\_P:                      0.503                      het\_I:                      0.0

|  | ngt | info | p_value | f_ca(n) | f_co(n) | ln(OR) | STDerr |
|--|-----|------|---------|---------|---------|--------|--------|
|--|-----|------|---------|---------|---------|--------|--------|

|                        |    |      |          |              |              |        |      |
|------------------------|----|------|----------|--------------|--------------|--------|------|
| PGC_SCZ wave3 eur only | 19 | 0.99 | 5.69e-11 | 0.758(53386) | 0.771(77258) | -0.067 | 0.01 |
|------------------------|----|------|----------|--------------|--------------|--------|------|

|                        |   |      |         |              |              |        |       |
|------------------------|---|------|---------|--------------|--------------|--------|-------|
| PGC_SCZ wave3 asn only | 5 | 0.99 | 0.00776 | 0.887(14004) | 0.894(16757) | -0.073 | 0.027 |
|------------------------|---|------|---------|--------------|--------------|--------|-------|

|                    |    |      |          |              |              |        |       |
|--------------------|----|------|----------|--------------|--------------|--------|-------|
| PGC_SCZ wave2 only | 19 | 1.00 | 1.35e-08 | 0.763(34850) | 0.771(44347) | -0.073 | 0.013 |
|--------------------|----|------|----------|--------------|--------------|--------|-------|

|                             |   |      |          |              |              |       |       |
|-----------------------------|---|------|----------|--------------|--------------|-------|-------|
| PGC_SCZ wave3 (excl. wave2) | 5 | 0.99 | 2.04e-05 | 0.808(32540) | 0.812(49668) | -0.06 | 0.014 |
|-----------------------------|---|------|----------|--------------|--------------|-------|-------|

|                                    |           |             |                 |                     |                     |               |             |
|------------------------------------|-----------|-------------|-----------------|---------------------|---------------------|---------------|-------------|
| <b>PGC_SCZ wave3 (incl. wave2)</b> | <b>24</b> | <b>0.99</b> | <b>1.56e-12</b> | <b>0.785(67390)</b> | <b>0.793(94015)</b> | <b>-0.067</b> | <b>0.01</b> |
|------------------------------------|-----------|-------------|-----------------|---------------------|---------------------|---------------|-------------|

|                      |   |      |       |             |               |       |       |
|----------------------|---|------|-------|-------------|---------------|-------|-------|
| Decode – Replication | 0 | 1.00 | 0.481 | 0.773(1979) | 0.809(142627) | -0.06 | 0.046 |
|----------------------|---|------|-------|-------------|---------------|-------|-------|

|                                                    |           |             |                 |                     |                      |               |              |
|----------------------------------------------------|-----------|-------------|-----------------|---------------------|----------------------|---------------|--------------|
| <b>PGC_SCZ wave3 (incl. wave2 and replication)</b> | <b>24</b> | <b>1.00</b> | <b>1.56e-12</b> | <b>0.785(69369)</b> | <b>0.803(236642)</b> | <b>-0.066</b> | <b>0.009</b> |
|----------------------------------------------------|-----------|-------------|-----------------|---------------------|----------------------|---------------|--------------|

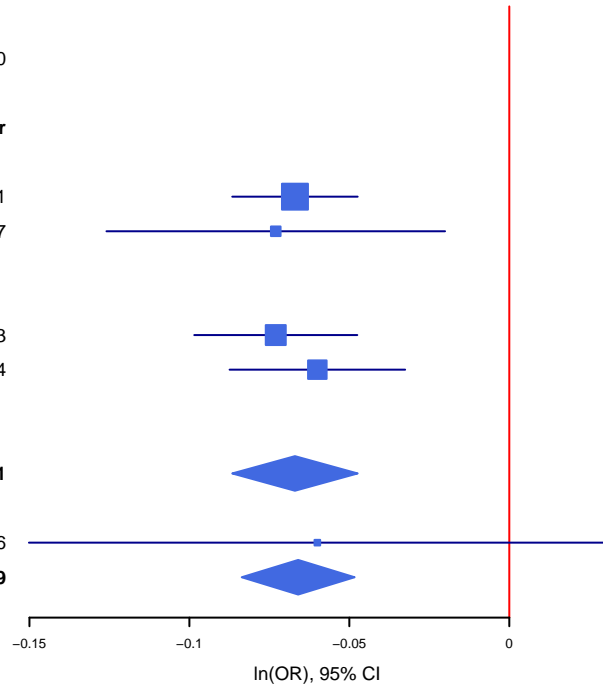

|                                                    |           |             |                 |                     |                      |              |              |
|----------------------------------------------------|-----------|-------------|-----------------|---------------------|----------------------|--------------|--------------|
| rs2929278                                          | C/T       |             | 15:44250313     |                     |                      |              |              |
|                                                    | --        |             | het_P:          |                     | 0.336                | het_I:       | 0.0          |
|                                                    | ngt       | info        | p_value         | f_ca(n)             | f_co(n)              | ln(OR)       | STDerr       |
| PGC_SCZ wave3 eur only                             | 23        | 0.94        | 2.62e-08        | 0.749(53386)        | 0.741(77258)         | 0.057        | 0.01         |
| PGC_SCZ wave3 asn only                             | 7         | 0.96        | 4.2e-05         | 0.744(14004)        | 0.728(16757)         | 0.08         | 0.02         |
| PGC_SCZ wave2 only                                 | 2         | 0.94        | 4.23e-05        | 0.753(34850)        | 0.748(44347)         | 0.053        | 0.013        |
| PGC_SCZ wave3 (excl. wave2)                        | 28        | 0.95        | 2.86e-08        | 0.742(32540)        | 0.73(49668)          | 0.07         | 0.013        |
| <b>PGC_SCZ wave3 (incl. wave2)</b>                 | <b>30</b> | <b>0.95</b> | <b>8.5e-12</b>  | <b>0.748(67390)</b> | <b>0.739(94015)</b>  | <b>0.062</b> | <b>0.009</b> |
| Decode – Replication                               | 0         | 1.00        | 0.0444          | 0.738(1979)         | 0.756(142627)        | 0.07         | 0.045        |
| <b>PGC_SCZ wave3 (incl. wave2 and replication)</b> | <b>30</b> | <b>0.98</b> | <b>1.59e-12</b> | <b>0.748(69369)</b> | <b>0.749(236642)</b> | <b>0.063</b> | <b>0.009</b> |

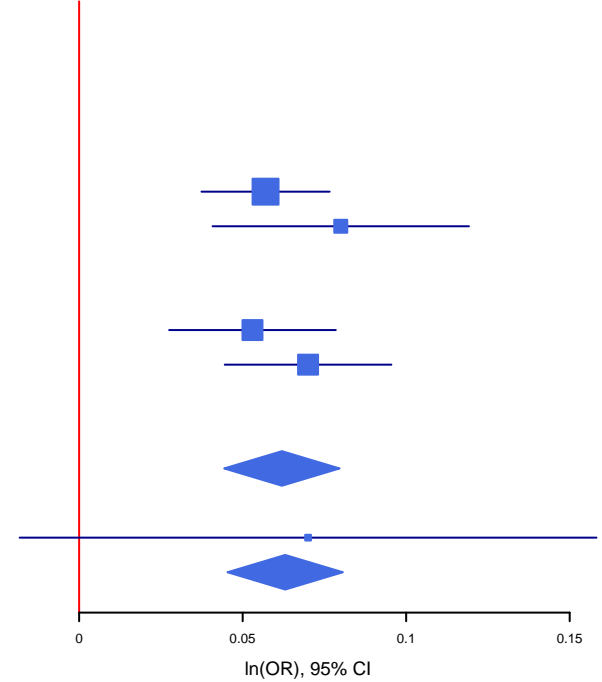

|                                                    |           |             |                 |                     |                      |              |             |
|----------------------------------------------------|-----------|-------------|-----------------|---------------------|----------------------|--------------|-------------|
| rs1940171                                          | A/G       |             | 11:124633640    |                     |                      |              |             |
|                                                    | ++        |             | het_P:          |                     | 0.406                | het_I:       | 0.0         |
|                                                    | ngt       | info        | p_value         | f_ca(n)             | f_co(n)              | ln(OR)       | STDerr      |
| PGC_SCZ wave3 eur only                             | 21        | 0.98        | 3e-11           | 0.819(53386)        | 0.807(77258)         | 0.074        | 0.011       |
| PGC_SCZ wave3 asn only                             | 4         | 0.96        | 0.00072         | 0.788(14004)        | 0.782(16757)         | 0.072        | 0.021       |
| PGC_SCZ wave2 only                                 | 13        | 1.00        | 2.36e-06        | 0.817(34850)        | 0.807(44347)         | 0.065        | 0.014       |
| PGC_SCZ wave3 (excl. wave2)                        | 12        | 0.96        | 5.48e-09        | 0.809(32540)        | 0.799(49668)         | 0.082        | 0.014       |
| <b>PGC_SCZ wave3 (incl. wave2)</b>                 | <b>25</b> | <b>0.98</b> | <b>8.87e-14</b> | <b>0.813(67390)</b> | <b>0.803(94015)</b>  | <b>0.074</b> | <b>0.01</b> |
| Decode – Replication                               | 0         | 1.00        | 0.314           | 0.822(1979)         | 0.79(142627)         | 0.082        | 0.048       |
| <b>PGC_SCZ wave3 (incl. wave2 and replication)</b> | <b>25</b> | <b>0.99</b> | <b>1.62e-12</b> | <b>0.813(69369)</b> | <b>0.795(236642)</b> | <b>0.068</b> | <b>0.01</b> |

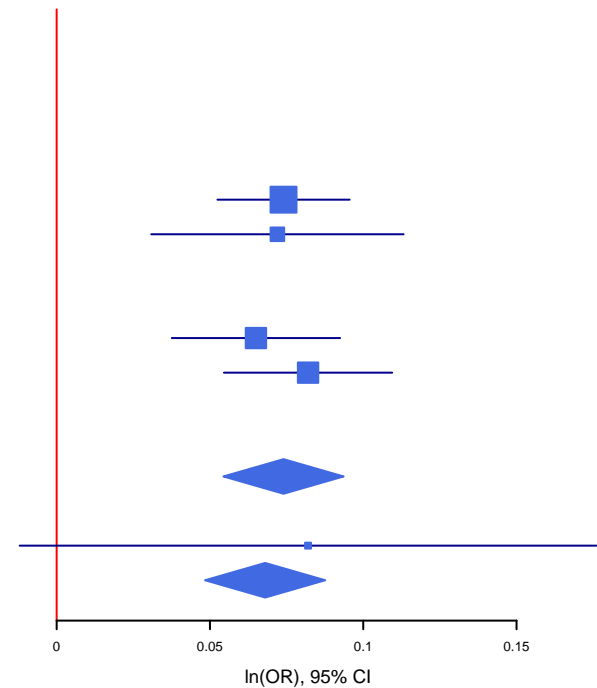

rs140001745

T/C

2:201199831

++

het\_P:

0.319

het\_I:

0.0

|  | ngt | info | p_value | f_ca(n) | f_co(n) | ln(OR) | STDerr |
|--|-----|------|---------|---------|---------|--------|--------|
|--|-----|------|---------|---------|---------|--------|--------|

PGC\_SCZ wave3 eur only

|   |      |          |              |              |       |       |
|---|------|----------|--------------|--------------|-------|-------|
| 0 | 0.99 | 0.000372 | 0.957(53386) | 0.952(77258) | 0.074 | 0.021 |
|---|------|----------|--------------|--------------|-------|-------|

PGC\_SCZ wave3 asn only

|   |      |         |              |              |       |       |
|---|------|---------|--------------|--------------|-------|-------|
| 0 | 0.99 | 1.9e-10 | 0.847(14004) | 0.829(16757) | 0.148 | 0.023 |
|---|------|---------|--------------|--------------|-------|-------|

PGC\_SCZ wave2 only

|   |      |          |             |              |       |       |
|---|------|----------|-------------|--------------|-------|-------|
| 0 | 0.99 | 4.12e-07 | 0.95(34850) | 0.949(44347) | 0.127 | 0.025 |
|---|------|----------|-------------|--------------|-------|-------|

PGC\_SCZ wave3 (excl. wave2)

|   |      |          |              |              |       |      |
|---|------|----------|--------------|--------------|-------|------|
| 0 | 0.99 | 1.63e-06 | 0.917(32540) | 0.913(49668) | 0.095 | 0.02 |
|---|------|----------|--------------|--------------|-------|------|

**PGC\_SCZ wave3 (incl. wave2)**

|          |             |                 |                     |                    |              |              |
|----------|-------------|-----------------|---------------------|--------------------|--------------|--------------|
| <b>0</b> | <b>0.99</b> | <b>5.13e-12</b> | <b>0.934(67390)</b> | <b>0.93(94015)</b> | <b>0.107</b> | <b>0.016</b> |
|----------|-------------|-----------------|---------------------|--------------------|--------------|--------------|

Decode – Replication

|   |      |       |             |               |       |       |
|---|------|-------|-------------|---------------|-------|-------|
| 0 | 1.00 | 0.142 | 0.952(1979) | 0.942(142627) | 0.095 | 0.089 |
|---|------|-------|-------------|---------------|-------|-------|

**PGC\_SCZ wave3 (incl. wave2 and replication)**

|          |             |                 |                     |                      |              |              |
|----------|-------------|-----------------|---------------------|----------------------|--------------|--------------|
| <b>0</b> | <b>1.00</b> | <b>1.76e-12</b> | <b>0.935(69369)</b> | <b>0.937(236642)</b> | <b>0.108</b> | <b>0.015</b> |
|----------|-------------|-----------------|---------------------|----------------------|--------------|--------------|

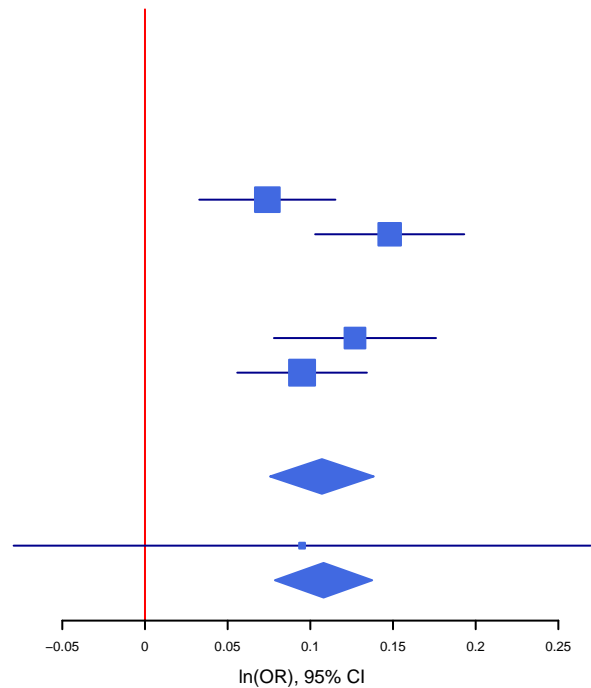

|                                                    |           |             |                 |                     |                      |               |              |
|----------------------------------------------------|-----------|-------------|-----------------|---------------------|----------------------|---------------|--------------|
| rs324017                                           | A/C       |             | 12:57487814     |                     |                      |               |              |
|                                                    | —         |             | het_P:          |                     | 0.412                | het_I:        | 0.0          |
|                                                    | ngt       | info        | p_value         | f_ca(n)             | f_co(n)              | ln(OR)        | STDerr       |
| PGC_SCZ wave3 eur only                             | 30        | 0.99        | 7.52e-12        | 0.278(53386)        | 0.29(77258)          | -0.066        | 0.01         |
| PGC_SCZ wave3 asn only                             | 2         | 0.96        | 0.151           | 0.468(14004)        | 0.474(16757)         | -0.025        | 0.018        |
| PGC_SCZ wave2 only                                 | 0         | 0.98        | 1.34e-07        | 0.292(34850)        | 0.3(44347)           | -0.063        | 0.012        |
| PGC_SCZ wave3 (excl. wave2)                        | 32        | 0.98        | 2.67e-05        | 0.345(32540)        | 0.343(49668)         | -0.049        | 0.012        |
| <b>PGC_SCZ wave3 (incl. wave2)</b>                 | <b>32</b> | <b>0.98</b> | <b>2.21e-11</b> | <b>0.318(67390)</b> | <b>0.323(94015)</b>  | <b>-0.056</b> | <b>0.008</b> |
| Decode – Replication                               | 0         | 1.00        | 0.0161          | 0.291(1979)         | 0.266(142627)        | -0.049        | 0.043        |
| <b>PGC_SCZ wave3 (incl. wave2 and replication)</b> | <b>32</b> | <b>0.99</b> | <b>1.93e-12</b> | <b>0.317(69369)</b> | <b>0.289(236642)</b> | <b>-0.058</b> | <b>0.008</b> |

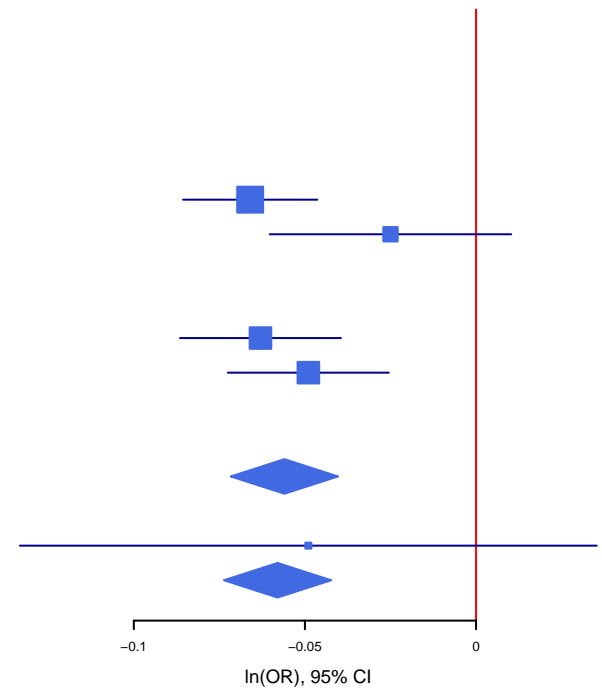

rs72728416

A/G

1:97834691

—

het\_P:

0.665

het\_I:

0.0

|  | ngt | info | p_value | f_ca(n) | f_co(n) | ln(OR) | STDerr |
|--|-----|------|---------|---------|---------|--------|--------|
|--|-----|------|---------|---------|---------|--------|--------|

PGC\_SCZ wave3 eur only

|   |      |          |              |              |        |      |
|---|------|----------|--------------|--------------|--------|------|
| 0 | 1.00 | 7.19e-12 | 0.749(53386) | 0.762(77258) | -0.068 | 0.01 |
|---|------|----------|--------------|--------------|--------|------|

PGC\_SCZ wave3 asn only

|   |      |        |              |              |        |       |
|---|------|--------|--------------|--------------|--------|-------|
| 0 | 0.98 | 0.0542 | 0.596(14004) | 0.601(16757) | -0.034 | 0.018 |
|---|------|--------|--------------|--------------|--------|-------|

PGC\_SCZ wave2 only

|   |      |         |              |              |        |       |
|---|------|---------|--------------|--------------|--------|-------|
| 0 | 1.00 | 8.4e-06 | 0.744(34850) | 0.759(44347) | -0.056 | 0.012 |
|---|------|---------|--------------|--------------|--------|-------|

PGC\_SCZ wave3 (excl. wave2)

|   |      |          |              |             |        |       |
|---|------|----------|--------------|-------------|--------|-------|
| 0 | 0.99 | 1.19e-07 | 0.688(32540) | 0.71(49668) | -0.063 | 0.012 |
|---|------|----------|--------------|-------------|--------|-------|

**PGC\_SCZ wave3 (incl. wave2)**

|          |             |                 |                     |                     |              |              |
|----------|-------------|-----------------|---------------------|---------------------|--------------|--------------|
| <b>0</b> | <b>0.99</b> | <b>4.99e-12</b> | <b>0.717(67390)</b> | <b>0.733(94015)</b> | <b>-0.06</b> | <b>0.009</b> |
|----------|-------------|-----------------|---------------------|---------------------|--------------|--------------|

Decode – Replication

|   |      |       |             |               |        |       |
|---|------|-------|-------------|---------------|--------|-------|
| 0 | 1.00 | 0.132 | 0.769(1979) | 0.775(142627) | -0.063 | 0.044 |
|---|------|-------|-------------|---------------|--------|-------|

**PGC\_SCZ wave3 (incl. wave2 and replication)**

|          |             |                 |                     |                      |              |              |
|----------|-------------|-----------------|---------------------|----------------------|--------------|--------------|
| <b>0</b> | <b>1.00</b> | <b>1.99e-12</b> | <b>0.718(69369)</b> | <b>0.758(236642)</b> | <b>-0.06</b> | <b>0.008</b> |
|----------|-------------|-----------------|---------------------|----------------------|--------------|--------------|

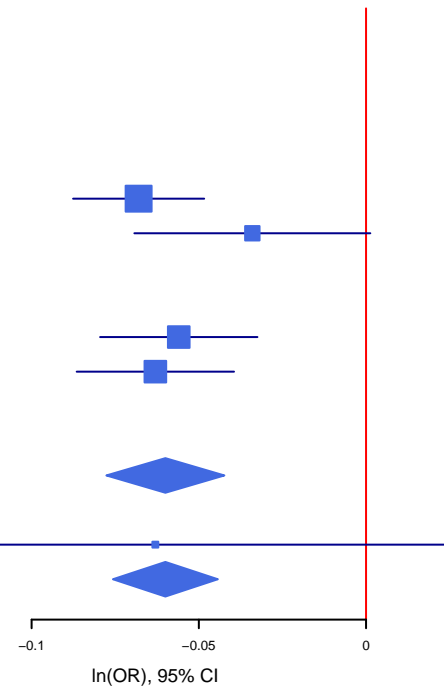

rs16851048

|     |                            |
|-----|----------------------------|
| T/C | 1:177276006                |
| --- | het_P: 0.584    het_I: 0.0 |

|                                             | ngt | info | p_value  | f_ca(n)      | f_co(n)       | ln(OR) | STDerr |
|---------------------------------------------|-----|------|----------|--------------|---------------|--------|--------|
| PGC_SCZ wave3 eur only                      | 18  | 0.99 | 4.15e-12 | 0.792(53386) | 0.805(77258)  | -0.074 | 0.011  |
| PGC_SCZ wave3 asn only                      | 3   | 0.97 | 0.0943   | 0.819(14004) | 0.826(16757)  | -0.038 | 0.022  |
| PGC_SCZ wave2 only                          | 12  | 0.99 | 9.19e-08 | 0.796(34850) | 0.808(44347)  | -0.073 | 0.014  |
| PGC_SCZ wave3 (excl. wave2)                 | 9   | 0.99 | 6.24e-06 | 0.799(32540) | 0.809(49668)  | -0.062 | 0.014  |
| PGC_SCZ wave3 (incl. wave2)                 | 21  | 0.99 | 3.06e-12 | 0.798(67390) | 0.809(94015)  | -0.068 | 0.01   |
| Decode - Replication                        | 0   | 1.00 | 0.298    | 0.772(1979)  | 0.794(142627) | -0.062 | 0.046  |
| PGC_SCZ wave3 (incl. wave2 and replication) | 21  | 1.00 | 2e-12    | 0.797(69369) | 0.8(236642)   | -0.067 | 0.01   |

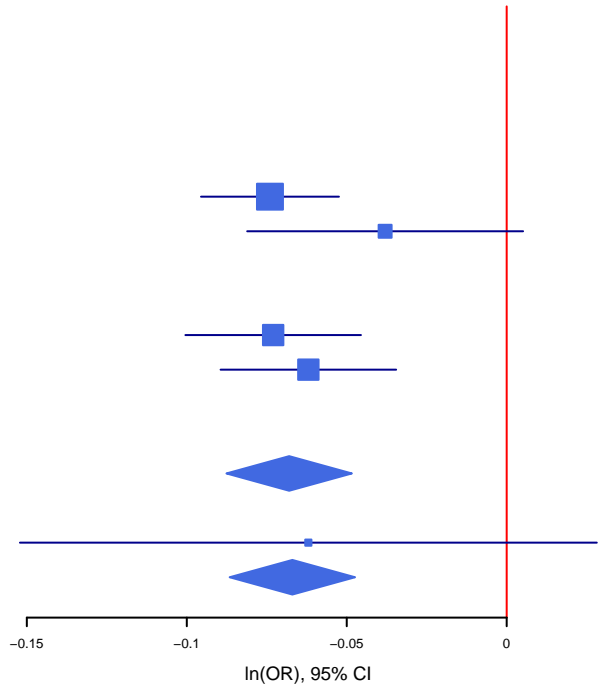



|                                                    |          |             |                 |                     |                      |              |              |
|----------------------------------------------------|----------|-------------|-----------------|---------------------|----------------------|--------------|--------------|
| rs4073003                                          | A/G      |             | 17:19148305     |                     |                      |              |              |
|                                                    | ++       |             | het_P:          |                     | 0.302                | het_I:       | 6.0          |
|                                                    | ngt      | info        | p_value         | f_ca(n)             | f_co(n)              | ln(OR)       | STDerr       |
| PGC_SCZ wave3 eur only                             | 1        | 0.95        | 9.97e-09        | 0.869(53386)        | 0.863(77258)         | 0.075        | 0.013        |
| PGC_SCZ wave3 asn only                             | 1        | 0.82        | 6.46e-05        | 0.199(14004)        | 0.184(16757)         | 0.1          | 0.025        |
| PGC_SCZ wave2 only                                 | 1        | 0.94        | 2.39e-08        | 0.834(34850)        | 0.849(44347)         | 0.093        | 0.017        |
| PGC_SCZ wave3 (excl. wave2)                        | 1        | 0.91        | 2.27e-05        | 0.618(32540)        | 0.646(49668)         | 0.069        | 0.016        |
| <b>PGC_SCZ wave3 (incl. wave2)</b>                 | <b>2</b> | <b>0.93</b> | <b>4.2e-12</b>  | <b>0.73(67390)</b>  | <b>0.742(94015)</b>  | <b>0.081</b> | <b>0.012</b> |
| Decode – Replication                               | 0        | 1.00        | 0.345           | 0.862(1979)         | 0.872(142627)        | 0.069        | 0.056        |
| <b>PGC_SCZ wave3 (incl. wave2 and replication)</b> | <b>2</b> | <b>0.97</b> | <b>2.65e-12</b> | <b>0.734(69369)</b> | <b>0.821(236642)</b> | <b>0.079</b> | <b>0.011</b> |

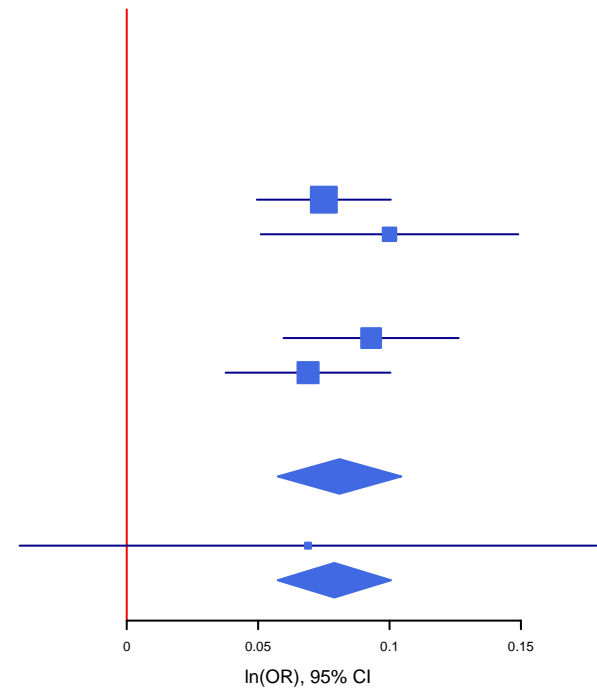

| <b>rs6969410</b>                                   | <b>T/G</b> |             | <b>7:110069015</b> |                     |                      |              |              |
|----------------------------------------------------|------------|-------------|--------------------|---------------------|----------------------|--------------|--------------|
|                                                    | ++         |             | het_P:             | 0.981               | het_I:               | 0.0          |              |
|                                                    | ngt        | info        | p_value            | f_ca(n)             | f_co(n)              | ln(OR)       | STDerr       |
| PGC_SCZ wave3 eur only                             | 0          | 1.00        | 7.63e-10           | 0.634(53386)        | 0.618(77258)         | 0.055        | 0.009        |
| PGC_SCZ wave3 asn only                             | 0          | 0.97        | 0.00701            | 0.819(14004)        | 0.814(16757)         | 0.06         | 0.022        |
| PGC_SCZ wave2 only                                 | 0          | 1.00        | 9.27e-07           | 0.643(34850)        | 0.619(44347)         | 0.055        | 0.011        |
| PGC_SCZ wave3 (excl. wave2)                        | 0          | 0.99        | 4.6e-06            | 0.705(32540)        | 0.684(49668)         | 0.056        | 0.012        |
| <b>PGC_SCZ wave3 (incl. wave2)</b>                 | <b>0</b>   | <b>0.99</b> | <b>1.9e-11</b>     | <b>0.673(67390)</b> | <b>0.653(94015)</b>  | <b>0.056</b> | <b>0.008</b> |
| Decode – Replication                               | 0          | 1.00        | 0.0285             | 0.652(1979)         | 0.628(142627)        | 0.056        | 0.04         |
| <b>PGC_SCZ wave3 (incl. wave2 and replication)</b> | <b>0</b>   | <b>1.00</b> | <b>2.68e-12</b>    | <b>0.672(69369)</b> | <b>0.638(236642)</b> | <b>0.057</b> | <b>0.008</b> |

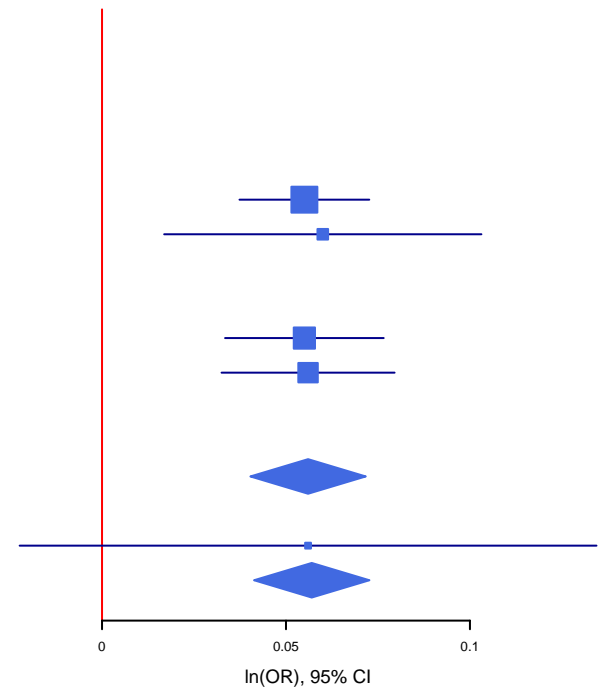

|                                                    |          |             |                 |                     |                      |              |             |
|----------------------------------------------------|----------|-------------|-----------------|---------------------|----------------------|--------------|-------------|
| rs11711948                                         | A/G      |             | 3:181188505     |                     |                      |              |             |
|                                                    | ++       |             | het_P:          |                     | 0.569                | het_I:       | 0.0         |
|                                                    | ngt      | info        | p_value         | f_ca(n)             | f_co(n)              | ln(OR)       | STDerr      |
| PGC_SCZ wave3 eur only                             | 0        | 0.99        | 1.06e-09        | 0.833(53386)        | 0.826(77258)         | 0.07         | 0.012       |
| PGC_SCZ wave3 asn only                             | 0        | 0.96        | 0.000162        | 0.877(14004)        | 0.864(16757)         | 0.099        | 0.026       |
| PGC_SCZ wave2 only                                 | 0        | 0.99        | 2.68e-06        | 0.84(34850)         | 0.831(44347)         | 0.069        | 0.015       |
| PGC_SCZ wave3 (excl. wave2)                        | 0        | 0.98        | 8.36e-08        | 0.845(32540)        | 0.833(49668)         | 0.081        | 0.015       |
| <b>PGC_SCZ wave3 (incl. wave2)</b>                 | <b>0</b> | <b>0.98</b> | <b>1.23e-12</b> | <b>0.842(67390)</b> | <b>0.832(94015)</b>  | <b>0.075</b> | <b>0.01</b> |
| Decode – Replication                               | 0        | 1.00        | 0.94            | 0.819(1979)         | 0.83(142627)         | 0.081        | 0.049       |
| <b>PGC_SCZ wave3 (incl. wave2 and replication)</b> | <b>0</b> | <b>0.99</b> | <b>2.94e-12</b> | <b>0.841(69369)</b> | <b>0.831(236642)</b> | <b>0.072</b> | <b>0.01</b> |

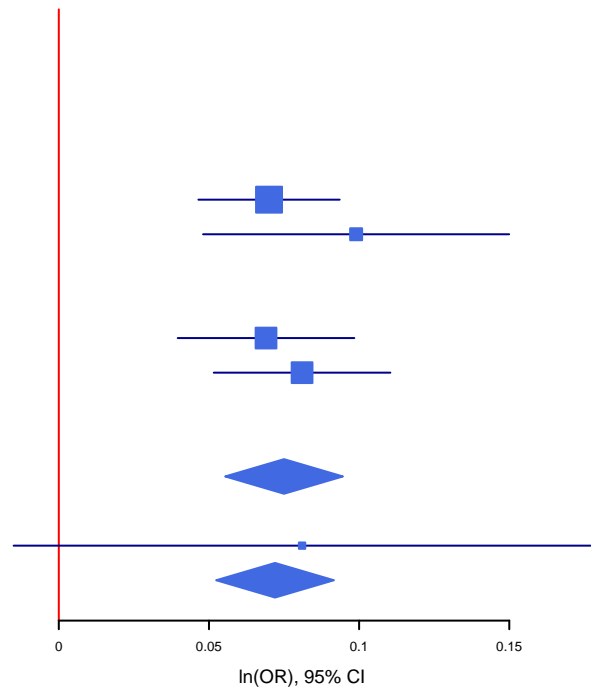

| rs13080668                                         | T/C       |             | 3:53443354      |                   |                      |              |              |
|----------------------------------------------------|-----------|-------------|-----------------|-------------------|----------------------|--------------|--------------|
|                                                    | ++        |             | het_P:          | 0.338             | het_I:               | 0.0          |              |
|                                                    | ngt       | info        | p_value         | f_ca(n)           | f_co(n)              | ln(OR)       | STDerr       |
| PGC_SCZ wave3 eur only                             | 20        | 1.00        | 1.38e-10        | 0.704(53386)      | 0.691(77258)         | 0.06         | 0.009        |
| PGC_SCZ wave3 asn only                             | 4         | 0.99        | 0.0234          | 0.684(14004)      | 0.677(16757)         | 0.042        | 0.018        |
| PGC_SCZ wave2 only                                 | 20        | 1.00        | 3.74e-05        | 0.698(34850)      | 0.689(44347)         | 0.048        | 0.012        |
| PGC_SCZ wave3 (excl. wave2)                        | 4         | 0.99        | 5.79e-08        | 0.701(32540)      | 0.689(49668)         | 0.064        | 0.012        |
| <b>PGC_SCZ wave3 (incl. wave2)</b>                 | <b>24</b> | <b>1.00</b> | <b>1.51e-11</b> | <b>0.7(67390)</b> | <b>0.689(94015)</b>  | <b>0.056</b> | <b>0.008</b> |
| Decode – Replication                               | 0         | 1.00        | 0.0985          | 0.682(1979)       | 0.686(142627)        | 0.064        | 0.041        |
| <b>PGC_SCZ wave3 (incl. wave2 and replication)</b> | <b>24</b> | <b>1.00</b> | <b>3.02e-12</b> | <b>0.7(69369)</b> | <b>0.687(236642)</b> | <b>0.057</b> | <b>0.008</b> |

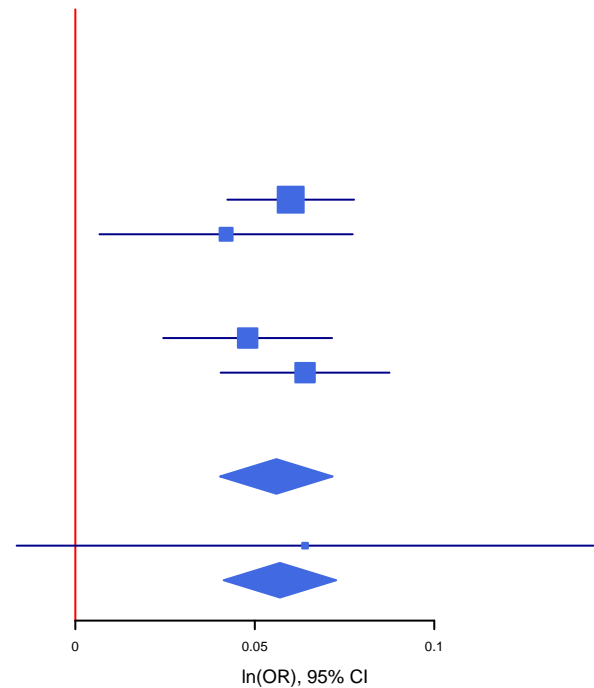

rs75968099

C/T

3:36858583

++

het\_P:

0.022

het\_I:

80.9

ngt info p\_value f\_ca(n) f\_co(n) ln(OR) STDerr

PGC\_SCZ wave3 eur only

7 0.98 1.25e-11 0.642(53386) 0.655(77258) -0.061 0.009

PGC\_SCZ wave3 asn only

0 0.90 0.817 0.943(14004) 0.947(16757) 0.01 0.041

PGC\_SCZ wave2 only

0 0.99 7.65e-11 0.657(34850) 0.662(44347) -0.075 0.012

PGC\_SCZ wave3 (excl. wave2)

7 0.95 0.0139 0.756(32540) 0.746(49668) -0.034 0.014

PGC\_SCZ wave3 (incl. wave2)

7 0.97 5.16e-11 0.705(67390) 0.707(94015) -0.058 0.009

Decode - Replication

0 1.00 0.00654 0.653(1979) 0.65(142627) -0.034 0.04

PGC\_SCZ wave3 (incl. wave2 and replication)

7 0.99 3.04e-12 0.704(69369) 0.672(236642) -0.061 0.009

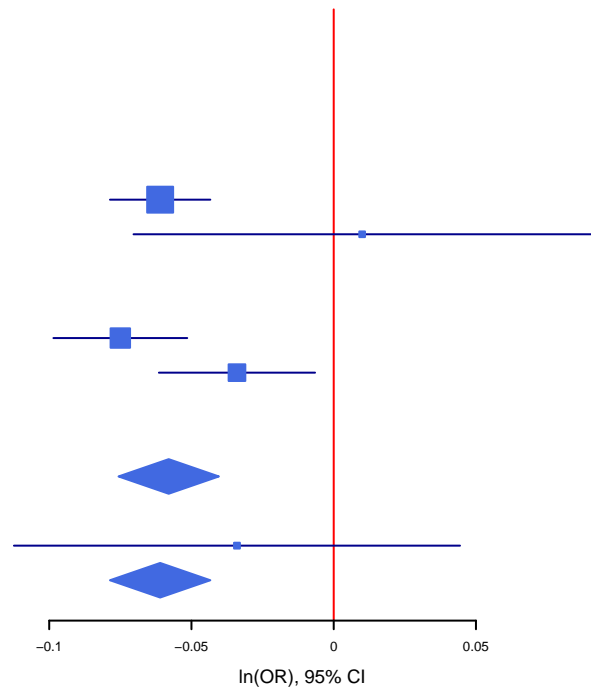

| <b>rs3929747</b>                                   |          | <b>C/T</b>  |                 | <b>10:104214267</b> |                      |              |              |
|----------------------------------------------------|----------|-------------|-----------------|---------------------|----------------------|--------------|--------------|
|                                                    |          | --          |                 | het_P:              | 0.974                | het_I:       | 0.0          |
|                                                    | ngt      | info        | p_value         | f_ca(n)             | f_co(n)              | ln(OR)       | STDerr       |
| PGC_SCZ wave3 eur only                             | 0        | 0.96        | 1.26e-06        | 0.787(53386)        | 0.778(77258)         | 0.051        | 0.011        |
| PGC_SCZ wave3 asn only                             | 0        | 0.92        | 3.75e-08        | 0.602(14004)        | 0.585(16757)         | 0.099        | 0.018        |
| PGC_SCZ wave2 only                                 | 0        | 0.96        | 1.54e-06        | 0.779(34850)        | 0.777(44347)         | 0.064        | 0.013        |
| PGC_SCZ wave3 (excl. wave2)                        | 0        | 0.95        | 4.39e-07        | 0.716(32540)        | 0.714(49668)         | 0.063        | 0.013        |
| <b>PGC_SCZ wave3 (incl. wave2)</b>                 | <b>0</b> | <b>0.96</b> | <b>3.13e-12</b> | <b>0.748(67390)</b> | <b>0.744(94015)</b>  | <b>0.064</b> | <b>0.009</b> |
| Decode – Replication                               | 0        | 1.00        | 0.583           | 0.768(1979)         | 0.758(142627)        | 0.063        | 0.044        |
| <b>PGC_SCZ wave3 (incl. wave2 and replication)</b> | <b>0</b> | <b>0.98</b> | <b>3.23e-12</b> | <b>0.749(69369)</b> | <b>0.752(236642)</b> | <b>0.062</b> | <b>0.009</b> |

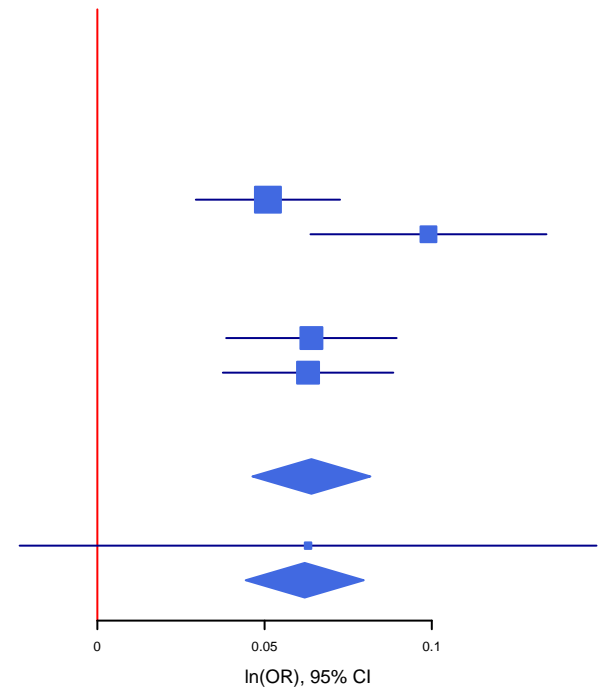

| rs3808581                                          | G/A      |             | 8:26250047      |                     |                     |               |             |
|----------------------------------------------------|----------|-------------|-----------------|---------------------|---------------------|---------------|-------------|
|                                                    | ++       |             | het_P:          | 0.18                | het_I:              | 44.4          |             |
|                                                    | ngt      | info        | p_value         | f_ca(n)             | f_co(n)             | ln(OR)        | STDerr      |
| PGC_SCZ wave3 eur only                             | 0        | 1.00        | 2.4e-07         | 0.825(53386)        | 0.835(77258)        | -0.059        | 0.012       |
| PGC_SCZ wave3 asn only                             | 0        | 0.94        | 1.48e-06        | 0.598(14004)        | 0.619(16757)        | -0.086        | 0.018       |
| PGC_SCZ wave2 only                                 | 0        | 1.00        | 1.36e-08        | 0.813(34850)        | 0.834(44347)        | -0.081        | 0.014       |
| PGC_SCZ wave3 (excl. wave2)                        | 0        | 0.98        | 2.48e-05        | 0.74(32540)         | 0.764(49668)        | -0.055        | 0.013       |
| <b>PGC_SCZ wave3 (incl. wave2)</b>                 | <b>0</b> | <b>0.99</b> | <b>3.82e-12</b> | <b>0.778(67390)</b> | <b>0.797(94015)</b> | <b>-0.067</b> | <b>0.01</b> |
| Decode – Replication                               | 0        | 1.00        | 0.409           | 0.822(1979)         | 0.818(142627)       | -0.055        | 0.049       |
| <b>PGC_SCZ wave3 (incl. wave2 and replication)</b> | <b>0</b> | <b>1.00</b> | <b>4.05e-12</b> | <b>0.779(69369)</b> | <b>0.81(236642)</b> | <b>-0.066</b> | <b>0.01</b> |

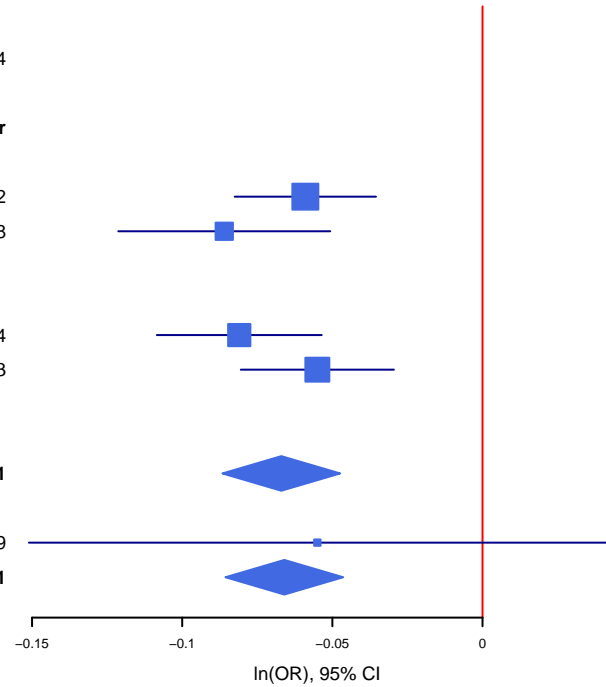

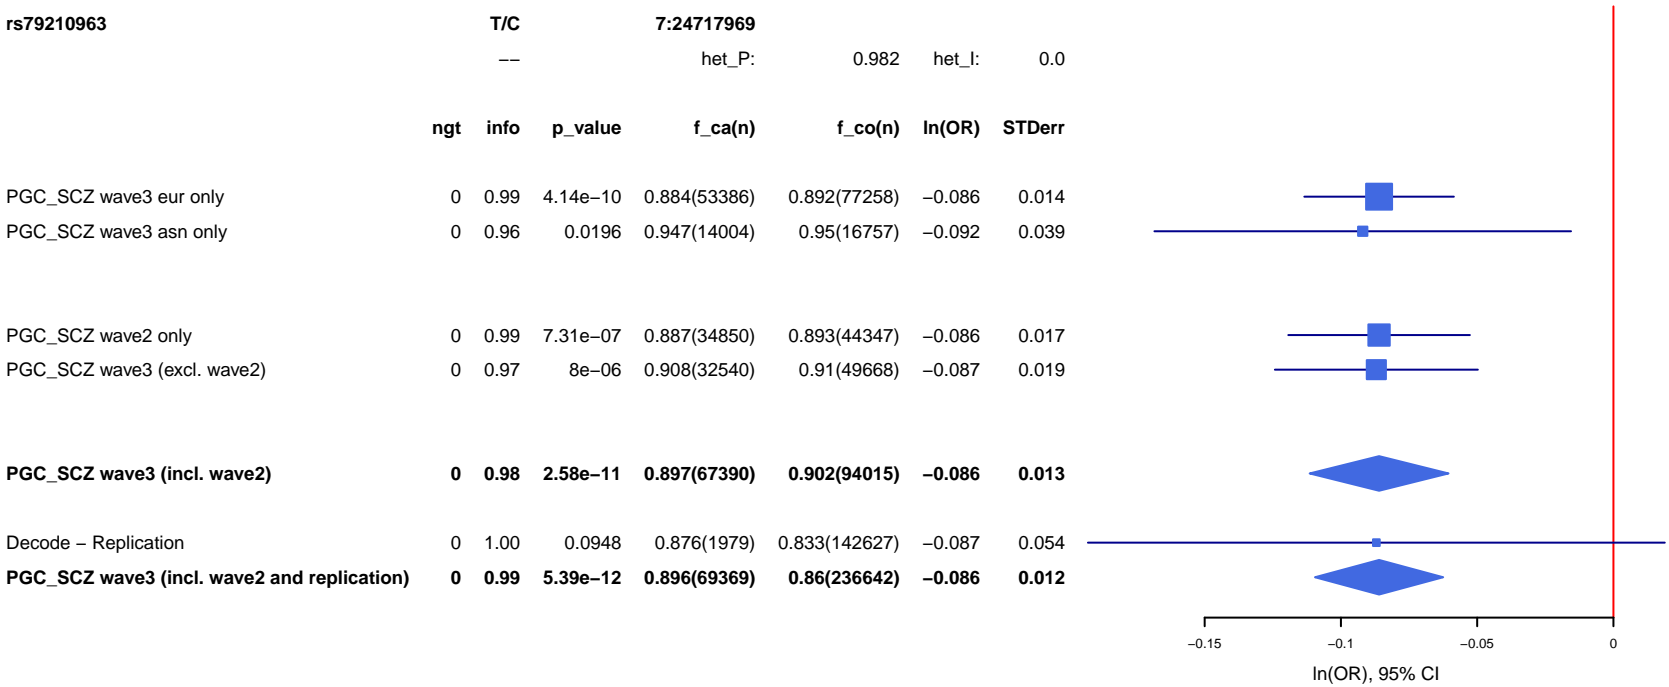



rs61833239

T/G

1:244010441

—

het\_P:

0.41

het\_I:

0.0

| ngt | info | p_value | f_ca(n) | f_co(n) | ln(OR) | STDerr |
|-----|------|---------|---------|---------|--------|--------|
|-----|------|---------|---------|---------|--------|--------|

PGC\_SCZ wave3 eur only

|    |      |         |              |              |        |       |
|----|------|---------|--------------|--------------|--------|-------|
| 17 | 0.78 | 2.8e-12 | 0.806(53386) | 0.815(77258) | -0.086 | 0.012 |
|----|------|---------|--------------|--------------|--------|-------|

PGC\_SCZ wave3 asn only

|   |      |       |             |              |       |       |
|---|------|-------|-------------|--------------|-------|-------|
| 0 | 0.33 | 0.941 | 0.955(9702) | 0.954(11240) | 0.006 | 0.082 |
|---|------|-------|-------------|--------------|-------|-------|

PGC\_SCZ wave2 only

|   |      |          |              |              |        |       |
|---|------|----------|--------------|--------------|--------|-------|
| 0 | 0.73 | 1.23e-08 | 0.814(34850) | 0.818(44347) | -0.093 | 0.016 |
|---|------|----------|--------------|--------------|--------|-------|

PGC\_SCZ wave3 (excl. wave2)

|    |      |         |              |              |        |       |
|----|------|---------|--------------|--------------|--------|-------|
| 17 | 0.72 | 6.9e-05 | 0.847(28238) | 0.847(44151) | -0.073 | 0.018 |
|----|------|---------|--------------|--------------|--------|-------|

**PGC\_SCZ wave3 (incl. wave2)**

|           |             |                 |                     |                     |               |              |
|-----------|-------------|-----------------|---------------------|---------------------|---------------|--------------|
| <b>17</b> | <b>0.72</b> | <b>5.22e-12</b> | <b>0.829(63088)</b> | <b>0.832(88498)</b> | <b>-0.084</b> | <b>0.012</b> |
|-----------|-------------|-----------------|---------------------|---------------------|---------------|--------------|

Decode – Replication

|   |      |      |             |             |        |       |
|---|------|------|-------------|-------------|--------|-------|
| 0 | 0.99 | 0.47 | 0.811(1979) | 0.8(142627) | -0.073 | 0.049 |
|---|------|------|-------------|-------------|--------|-------|

**PGC\_SCZ wave3 (incl. wave2 and replication)**

|           |             |                 |                     |                      |               |              |
|-----------|-------------|-----------------|---------------------|----------------------|---------------|--------------|
| <b>17</b> | <b>0.89</b> | <b>5.94e-12</b> | <b>0.828(65067)</b> | <b>0.812(231125)</b> | <b>-0.082</b> | <b>0.012</b> |
|-----------|-------------|-----------------|---------------------|----------------------|---------------|--------------|

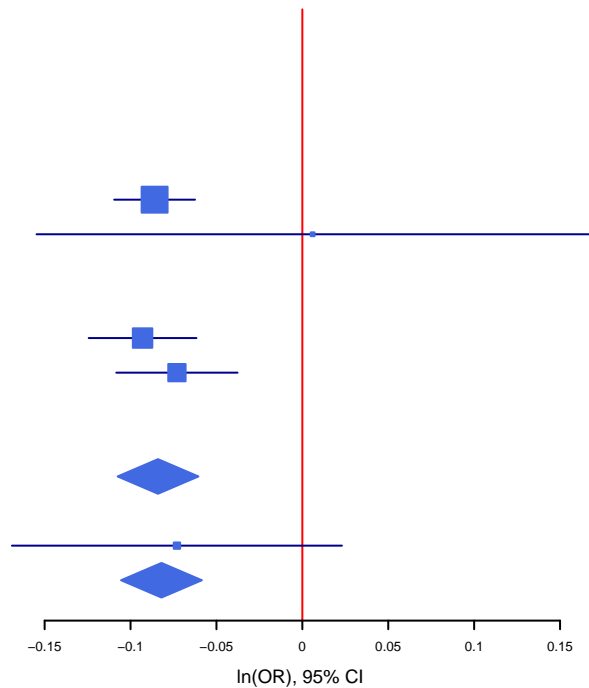

rs16825349

A/G

2:146425531

—

het\_P:

0.893

het\_I:

0.0

|  | ngt | info | p_value | f_ca(n) | f_co(n) | ln(OR) | STDerr |
|--|-----|------|---------|---------|---------|--------|--------|
|--|-----|------|---------|---------|---------|--------|--------|

PGC\_SCZ wave3 eur only

|    |      |          |              |              |        |       |
|----|------|----------|--------------|--------------|--------|-------|
| 49 | 0.99 | 7.72e-10 | 0.814(53386) | 0.824(77258) | -0.069 | 0.011 |
|----|------|----------|--------------|--------------|--------|-------|

PGC\_SCZ wave3 asn only

|   |      |        |              |              |        |       |
|---|------|--------|--------------|--------------|--------|-------|
| 7 | 0.98 | 0.0045 | 0.893(14004) | 0.898(16757) | -0.079 | 0.028 |
|---|------|--------|--------------|--------------|--------|-------|

PGC\_SCZ wave2 only

|    |      |          |             |              |        |       |
|----|------|----------|-------------|--------------|--------|-------|
| 13 | 0.99 | 5.41e-07 | 0.82(34850) | 0.829(44347) | -0.072 | 0.014 |
|----|------|----------|-------------|--------------|--------|-------|

PGC\_SCZ wave3 (excl. wave2)

|    |      |          |              |              |        |       |
|----|------|----------|--------------|--------------|--------|-------|
| 43 | 0.99 | 5.41e-06 | 0.841(32540) | 0.844(49668) | -0.069 | 0.015 |
|----|------|----------|--------------|--------------|--------|-------|

PGC\_SCZ wave3 (incl. wave2)

|    |      |          |             |              |       |      |
|----|------|----------|-------------|--------------|-------|------|
| 56 | 0.99 | 1.32e-11 | 0.83(67390) | 0.837(94015) | -0.07 | 0.01 |
|----|------|----------|-------------|--------------|-------|------|

Decode – Replication

|   |      |       |             |               |        |       |
|---|------|-------|-------------|---------------|--------|-------|
| 0 | 1.00 | 0.217 | 0.822(1979) | 0.788(142627) | -0.069 | 0.048 |
|---|------|-------|-------------|---------------|--------|-------|

PGC\_SCZ wave3 (incl. wave2 and replication)

|    |      |         |             |               |       |      |
|----|------|---------|-------------|---------------|-------|------|
| 56 | 0.99 | 6.1e-12 | 0.83(69369) | 0.807(236642) | -0.07 | 0.01 |
|----|------|---------|-------------|---------------|-------|------|

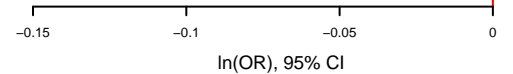

|                                                    |           |             |                 |                     |                      |              |              |
|----------------------------------------------------|-----------|-------------|-----------------|---------------------|----------------------|--------------|--------------|
| rs1440480                                          | A/G       |             | 11:134290032    |                     |                      |              |              |
|                                                    | ++        |             | het_P:          |                     | 0.359                | het_I:       | 0.0          |
|                                                    | ngt       | info        | p_value         | f_ca(n)             | f_co(n)              | ln(OR)       | STDerr       |
| PGC_SCZ wave3 eur only                             | 31        | 0.96        | 6.8e-11         | 0.39(53386)         | 0.378(77258)         | 0.059        | 0.009        |
| PGC_SCZ wave3 asn only                             | 2         | 0.77        | 0.136           | 0.135(14004)        | 0.133(16757)         | 0.043        | 0.029        |
| PGC_SCZ wave2 only                                 | 2         | 0.94        | 1.34e-05        | 0.376(34850)        | 0.373(44347)         | 0.05         | 0.012        |
| PGC_SCZ wave3 (excl. wave2)                        | 31        | 0.91        | 2.77e-07        | 0.295(32540)        | 0.3(49668)           | 0.066        | 0.013        |
| <b>PGC_SCZ wave3 (incl. wave2)</b>                 | <b>33</b> | <b>0.92</b> | <b>2.52e-11</b> | <b>0.337(67390)</b> | <b>0.334(94015)</b>  | <b>0.058</b> | <b>0.009</b> |
| Decode – Replication                               | 0         | 1.00        | 0.12            | 0.349(1979)         | 0.349(142627)        | 0.066        | 0.04         |
| <b>PGC_SCZ wave3 (incl. wave2 and replication)</b> | <b>33</b> | <b>0.97</b> | <b>6.69e-12</b> | <b>0.337(69369)</b> | <b>0.343(236642)</b> | <b>0.058</b> | <b>0.008</b> |

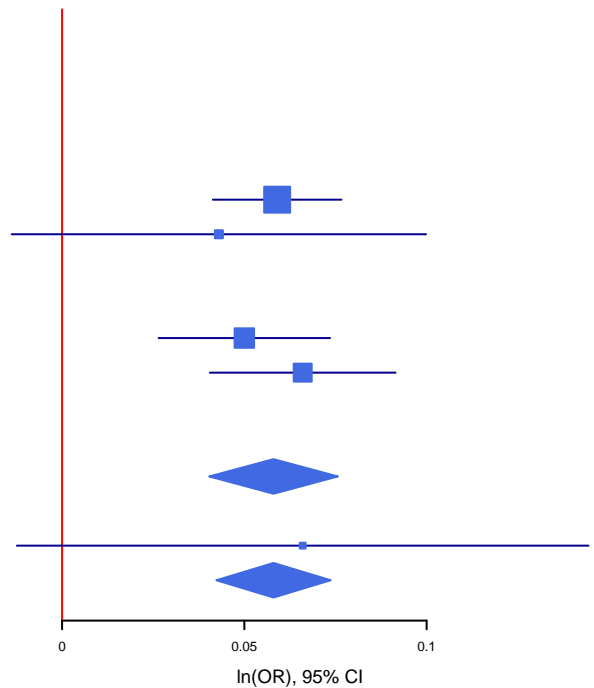

rs10117

G/A

5:137892170

—

het\_P:

0.952

het\_I:

0.0

|  | ngt | info | p_value | f_ca(n) | f_co(n) | ln(OR) | STDerr |
|--|-----|------|---------|---------|---------|--------|--------|
|--|-----|------|---------|---------|---------|--------|--------|

PGC\_SCZ wave3 eur only

|    |      |          |              |              |       |       |
|----|------|----------|--------------|--------------|-------|-------|
| 18 | 1.00 | 4.66e-10 | 0.613(53386) | 0.602(77258) | 0.055 | 0.009 |
|----|------|----------|--------------|--------------|-------|-------|

PGC\_SCZ wave3 asn only

|   |      |         |              |              |       |       |
|---|------|---------|--------------|--------------|-------|-------|
| 4 | 0.94 | 0.00575 | 0.235(14004) | 0.223(16757) | 0.058 | 0.021 |
|---|------|---------|--------------|--------------|-------|-------|

PGC\_SCZ wave2 only

|    |      |          |              |              |       |       |
|----|------|----------|--------------|--------------|-------|-------|
| 15 | 0.99 | 8.89e-07 | 0.595(34850) | 0.596(44347) | 0.055 | 0.011 |
|----|------|----------|--------------|--------------|-------|-------|

PGC\_SCZ wave3 (excl. wave2)

|   |      |          |              |              |       |       |
|---|------|----------|--------------|--------------|-------|-------|
| 7 | 0.98 | 2.37e-06 | 0.469(32540) | 0.479(49668) | 0.056 | 0.012 |
|---|------|----------|--------------|--------------|-------|-------|

PGC\_SCZ wave3 (incl. wave2)

|    |      |          |              |              |       |       |
|----|------|----------|--------------|--------------|-------|-------|
| 22 | 0.99 | 9.54e-12 | 0.534(67390) | 0.534(94015) | 0.056 | 0.008 |
|----|------|----------|--------------|--------------|-------|-------|

Decode – Replication

|   |      |      |             |               |       |       |
|---|------|------|-------------|---------------|-------|-------|
| 0 | 1.00 | 0.27 | 0.584(1979) | 0.609(142627) | 0.056 | 0.039 |
|---|------|------|-------------|---------------|-------|-------|

PGC\_SCZ wave3 (incl. wave2 and replication)

|    |      |          |              |               |       |       |
|----|------|----------|--------------|---------------|-------|-------|
| 22 | 0.99 | 7.36e-12 | 0.535(69369) | 0.579(236642) | 0.055 | 0.008 |
|----|------|----------|--------------|---------------|-------|-------|

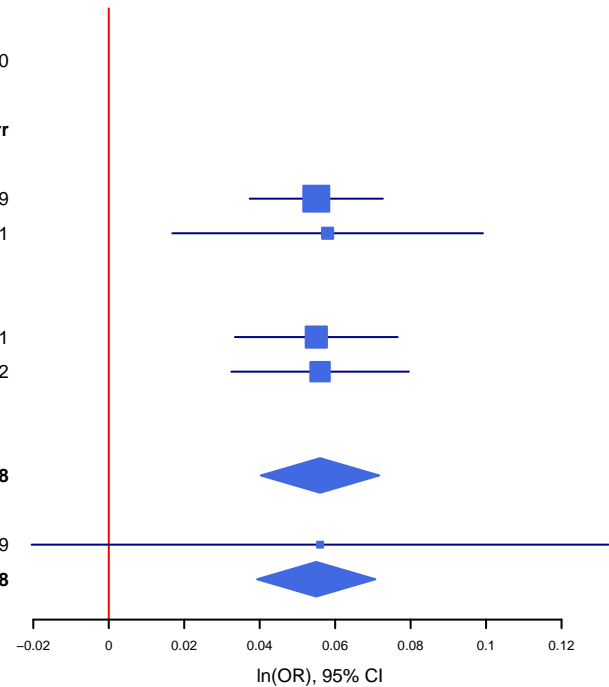

|                                                    |           |             |                 |                     |                      |             |              |
|----------------------------------------------------|-----------|-------------|-----------------|---------------------|----------------------|-------------|--------------|
| rs9304548                                          | C/A       |             | 18:27500959     |                     |                      |             |              |
|                                                    | ---       |             | het_P:          |                     | 0.173                | het_I:      | 46.2         |
|                                                    | ngt       | info        | p_value         | f_ca(n)             | f_co(n)              | ln(OR)      | STDerr       |
| PGC_SCZ wave3 eur only                             | 12        | 0.96        | 1.59e-08        | 0.261(53386)        | 0.252(77258)         | 0.057       | 0.01         |
| PGC_SCZ wave3 asn only                             | 3         | 0.94        | 0.000221        | 0.28(14004)         | 0.267(16757)         | 0.072       | 0.02         |
| PGC_SCZ wave2 only                                 | 11        | 0.94        | 0.000198        | 0.261(34850)        | 0.252(44347)         | 0.048       | 0.013        |
| PGC_SCZ wave3 (excl. wave2)                        | 4         | 0.97        | 8.82e-09        | 0.27(32540)         | 0.256(49668)         | 0.072       | 0.012        |
| <b>PGC_SCZ wave3 (incl. wave2)</b>                 | <b>15</b> | <b>0.96</b> | <b>1.89e-11</b> | <b>0.265(67390)</b> | <b>0.254(94015)</b>  | <b>0.06</b> | <b>0.009</b> |
| Decode - Replication                               | 0         | 1.00        | 0.242           | 0.231(1979)         | 0.229(142627)        | 0.072       | 0.045        |
| <b>PGC_SCZ wave3 (incl. wave2 and replication)</b> | <b>15</b> | <b>0.98</b> | <b>7.87e-12</b> | <b>0.264(69369)</b> | <b>0.239(236642)</b> | <b>0.06</b> | <b>0.009</b> |

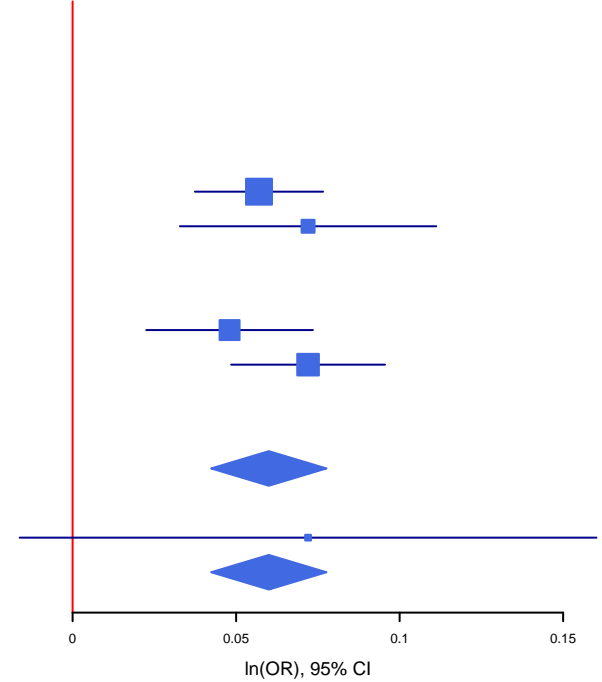

| rs1163238                                          | G/A      |             | 10:104943993    |                     |                      |               |              |
|----------------------------------------------------|----------|-------------|-----------------|---------------------|----------------------|---------------|--------------|
|                                                    | ++       |             | het_P:          | 0.481               | het_I:               | 0.0           |              |
|                                                    | ngt      | info        | p_value         | f_ca(n)             | f_co(n)              | ln(OR)        | STDerr       |
| PGC_SCZ wave3 eur only                             | 6        | 0.99        | 8.86e-09        | 0.618(53386)        | 0.628(77258)         | -0.051        | 0.009        |
| PGC_SCZ wave3 asn only                             | 0        | 0.95        | 0.0018          | 0.743(14004)        | 0.752(16757)         | -0.062        | 0.02         |
| PGC_SCZ wave2 only                                 | 0        | 0.99        | 1.97e-07        | 0.624(34850)        | 0.634(44347)         | -0.059        | 0.011        |
| PGC_SCZ wave3 (excl. wave2)                        | 6        | 0.97        | 6.31e-05        | 0.666(32540)        | 0.665(49668)         | -0.047        | 0.012        |
| <b>PGC_SCZ wave3 (incl. wave2)</b>                 | <b>6</b> | <b>0.98</b> | <b>6.8e-11</b>  | <b>0.644(67390)</b> | <b>0.651(94015)</b>  | <b>-0.053</b> | <b>0.008</b> |
| Decode – Replication                               | 0        | 1.00        | 0.0408          | 0.661(1979)         | 0.634(142627)        | -0.047        | 0.04         |
| <b>PGC_SCZ wave3 (incl. wave2 and replication)</b> | <b>6</b> | <b>0.99</b> | <b>8.36e-12</b> | <b>0.644(69369)</b> | <b>0.641(236642)</b> | <b>-0.054</b> | <b>0.008</b> |

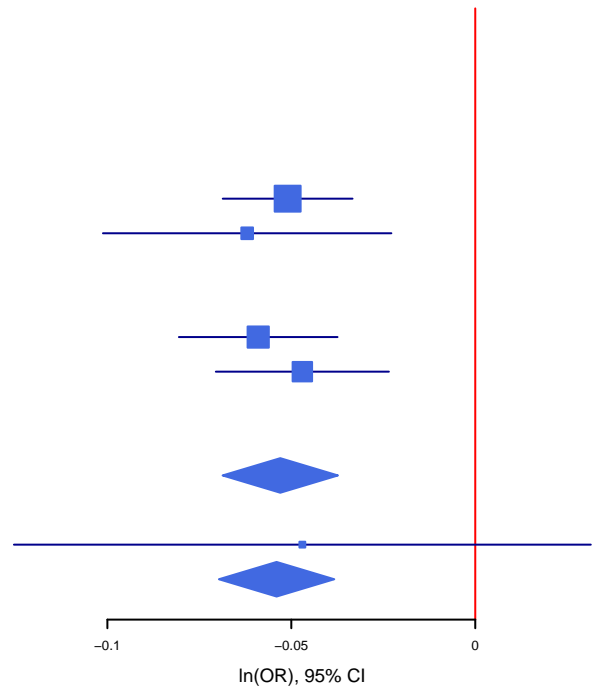

| 8:4180090_T_A                                      |          | T/A         |                 | 8:4180090           |                     |               |              |                                                                                     |  |
|----------------------------------------------------|----------|-------------|-----------------|---------------------|---------------------|---------------|--------------|-------------------------------------------------------------------------------------|--|
|                                                    |          | ++          |                 | het_P:              | 0.318               | het_I:        | 0.0          |                                                                                     |  |
|                                                    | ngt      | info        | p_value         | f_ca(n)             | f_co(n)             | ln(OR)        | STDerr       |                                                                                     |  |
| PGC_SCZ wave3 eur only                             | 7        | 0.99        | 5.07e-10        | 0.798(53386)        | 0.806(77258)        | -0.067        | 0.011        |  |  |
| PGC_SCZ wave3 asn only                             | 0        | 0.97        | 0.00721         | 0.675(14004)        | 0.683(16757)        | -0.05         | 0.018        |  |  |
| PGC_SCZ wave2 only                                 | 7        | 1.00        | 7.31e-08        | 0.79(34850)         | 0.8(44347)          | -0.072        | 0.014        |  |  |
| PGC_SCZ wave3 (excl. wave2)                        | 0        | 0.98        | 3.32e-05        | 0.754(32540)        | 0.769(49668)        | -0.054        | 0.013        |  |  |
| <b>PGC_SCZ wave3 (incl. wave2)</b>                 | <b>7</b> | <b>0.99</b> | <b>1.78e-11</b> | <b>0.772(67390)</b> | <b>0.784(94015)</b> | <b>-0.063</b> | <b>0.009</b> |  |  |
| Decode – Replication                               | 0        | 0.98        | 0.452           | 0.807(1052)         | 0.807(1399)         | -0.054        | 0.075        |  |  |
| <b>PGC_SCZ wave3 (incl. wave2 and replication)</b> | <b>7</b> | <b>0.99</b> | <b>1.09e-11</b> | <b>0.773(68442)</b> | <b>0.784(95414)</b> | <b>-0.063</b> | <b>0.009</b> |  |  |

ln(OR), 95% CI

rs56205728

G/A  
++  
15:40567237  
het\_P: 0.049  
het\_I: 74.3

|                                             | ngt | info | p_value  | f_ca(n)      | f_co(n)       | ln(OR) | STDerr |
|---------------------------------------------|-----|------|----------|--------------|---------------|--------|--------|
| PGC_SCZ wave3 eur only                      | 29  | 0.94 | 1.01e-10 | 0.7(53386)   | 0.713(77258)  | -0.063 | 0.01   |
| PGC_SCZ wave3 asn only                      | 5   | 0.82 | 0.849    | 0.885(14004) | 0.881(16757)  | -0.006 | 0.03   |
| PGC_SCZ wave2 only                          | 2   | 0.93 | 3.2e-09  | 0.71(34850)  | 0.719(44347)  | -0.074 | 0.012  |
| PGC_SCZ wave3 (excl. wave2)                 | 32  | 0.91 | 0.00673  | 0.769(32540) | 0.765(49668)  | -0.037 | 0.014  |
| PGC_SCZ wave3 (incl. wave2)                 | 34  | 0.92 | 5.43e-10 | 0.739(67390) | 0.743(94015)  | -0.058 | 0.009  |
| Decode - Replication                        | 0   | 1.00 | 0.000662 | 0.71(1979)   | 0.716(142627) | -0.037 | 0.042  |
| PGC_SCZ wave3 (incl. wave2 and replication) | 34  | 0.97 | 1.25e-11 | 0.738(69369) | 0.727(236642) | -0.062 | 0.009  |

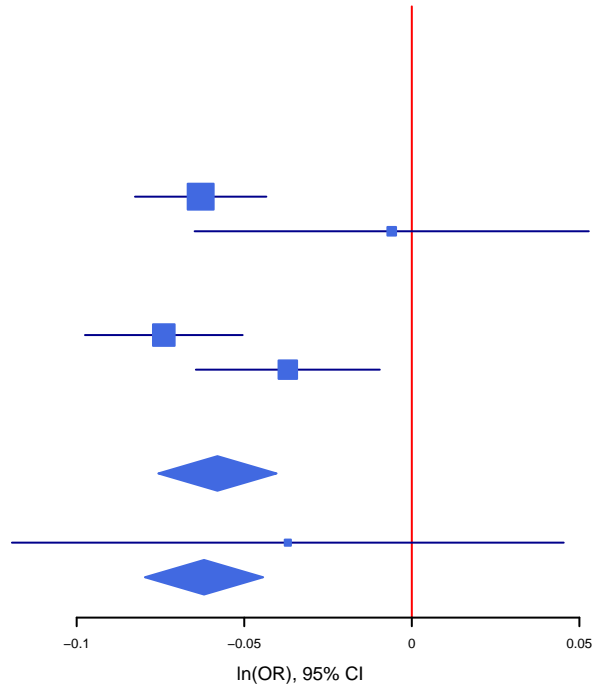



|                                                    |          |             |                 |                     |                      |              |              |
|----------------------------------------------------|----------|-------------|-----------------|---------------------|----------------------|--------------|--------------|
| rs113113059                                        | T/C      |             | 6:43160375      |                     |                      |              |              |
|                                                    | ++       |             | het_P:          | 0.358               | het_I:               | 0.0          |              |
|                                                    | ngt      | info        | p_value         | f_ca(n)             | f_co(n)              | ln(OR)       | STDerr       |
| PGC_SCZ wave3 eur only                             | 0        | 0.99        | 4.89e-08        | 0.796(53386)        | 0.788(77258)         | 0.058        | 0.011        |
| PGC_SCZ wave3 asn only                             | 0        | 0.95        | 9.32e-05        | 0.627(14004)        | 0.611(16757)         | 0.07         | 0.018        |
| PGC_SCZ wave2 only                                 | 0        | 0.99        | 8.95e-05        | 0.788(34850)        | 0.787(44347)         | 0.052        | 0.013        |
| PGC_SCZ wave3 (excl. wave2)                        | 0        | 0.97        | 3.89e-08        | 0.731(32540)        | 0.729(49668)         | 0.069        | 0.013        |
| <b>PGC_SCZ wave3 (incl. wave2)</b>                 | <b>0</b> | <b>0.98</b> | <b>2.29e-11</b> | <b>0.761(67390)</b> | <b>0.756(94015)</b>  | <b>0.061</b> | <b>0.009</b> |
| Decode – Replication                               | 0        | 1.00        | 0.256           | 0.794(1979)         | 0.804(142627)        | 0.069        | 0.048        |
| <b>PGC_SCZ wave3 (incl. wave2 and replication)</b> | <b>0</b> | <b>0.99</b> | <b>1.31e-11</b> | <b>0.762(69369)</b> | <b>0.785(236642)</b> | <b>0.061</b> | <b>0.009</b> |

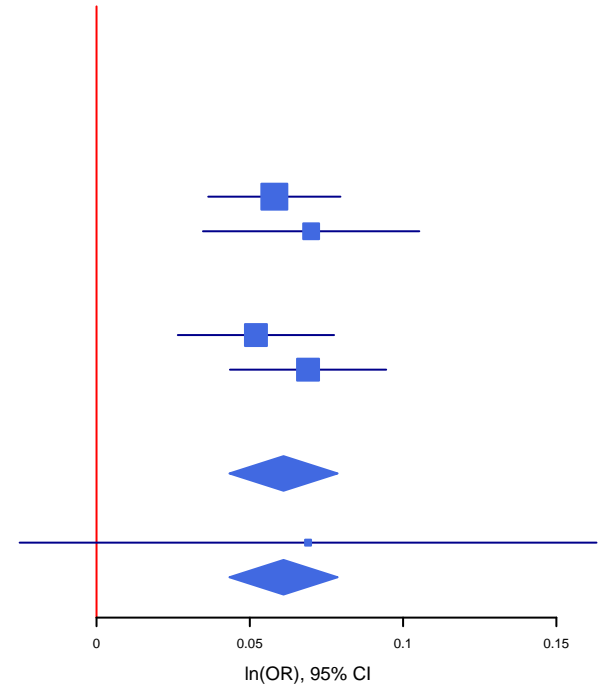

rs12943566

A/G

17:2157774

—

het\_P:

0.239

het\_I:

28.0

|  | ngt | info | p_value | f_ca(n) | f_co(n) | ln(OR) | STDerr |
|--|-----|------|---------|---------|---------|--------|--------|
|--|-----|------|---------|---------|---------|--------|--------|

PGC\_SCZ wave3 eur only

|   |      |          |              |              |       |       |
|---|------|----------|--------------|--------------|-------|-------|
| 0 | 0.99 | 5.12e-08 | 0.335(53386) | 0.347(77258) | -0.05 | 0.009 |
|---|------|----------|--------------|--------------|-------|-------|

PGC\_SCZ wave3 asn only

|   |      |          |              |             |        |      |
|---|------|----------|--------------|-------------|--------|------|
| 0 | 0.99 | 0.000862 | 0.234(14004) | 0.25(16757) | -0.066 | 0.02 |
|---|------|----------|--------------|-------------|--------|------|

PGC\_SCZ wave2 only

|   |      |         |              |              |        |       |
|---|------|---------|--------------|--------------|--------|-------|
| 0 | 0.99 | 7.9e-08 | 0.326(34850) | 0.342(44347) | -0.062 | 0.012 |
|---|------|---------|--------------|--------------|--------|-------|

PGC\_SCZ wave3 (excl. wave2)

|   |      |          |              |              |        |       |
|---|------|----------|--------------|--------------|--------|-------|
| 0 | 0.99 | 0.000354 | 0.301(32540) | 0.319(49668) | -0.043 | 0.012 |
|---|------|----------|--------------|--------------|--------|-------|

**PGC\_SCZ wave3 (incl. wave2)**

|          |             |                 |                     |                    |               |              |
|----------|-------------|-----------------|---------------------|--------------------|---------------|--------------|
| <b>0</b> | <b>0.99</b> | <b>2.29e-10</b> | <b>0.314(67390)</b> | <b>0.33(94015)</b> | <b>-0.053</b> | <b>0.008</b> |
|----------|-------------|-----------------|---------------------|--------------------|---------------|--------------|

Decode – Replication

|   |      |         |             |               |        |      |
|---|------|---------|-------------|---------------|--------|------|
| 0 | 1.00 | 0.00567 | 0.362(1979) | 0.378(142627) | -0.043 | 0.04 |
|---|------|---------|-------------|---------------|--------|------|

**PGC\_SCZ wave3 (incl. wave2 and replication)**

|          |             |                |                     |                      |               |              |
|----------|-------------|----------------|---------------------|----------------------|---------------|--------------|
| <b>0</b> | <b>1.00</b> | <b>1.4e-11</b> | <b>0.315(69369)</b> | <b>0.359(236642)</b> | <b>-0.055</b> | <b>0.008</b> |
|----------|-------------|----------------|---------------------|----------------------|---------------|--------------|

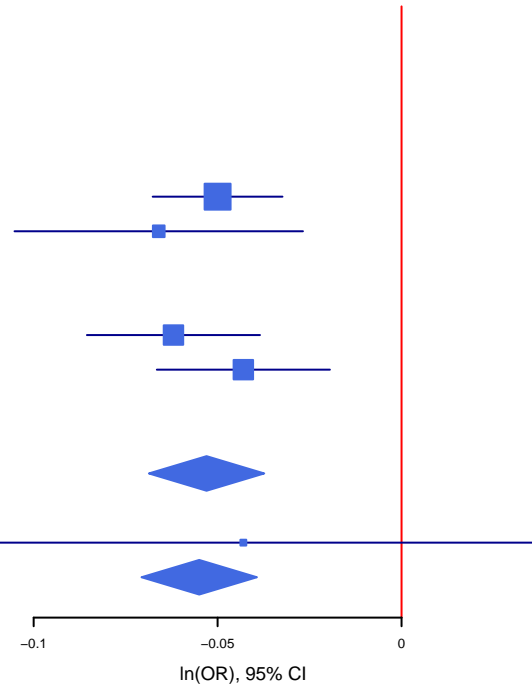

| rs1454606                                          | C/T       |             | 4:33642614     |                     |                      |               |              |
|----------------------------------------------------|-----------|-------------|----------------|---------------------|----------------------|---------------|--------------|
|                                                    | ++        |             | het_P:         | 0.266               | het_I:               | 19.2          |              |
|                                                    | ngt       | info        | p_value        | f_ca(n)             | f_co(n)              | ln(OR)        | STDerr       |
| PGC_SCZ wave3 eur only                             | 59        | 0.94        | 3.46e-06       | 0.867(53386)        | 0.875(77258)         | -0.061        | 0.013        |
| PGC_SCZ wave3 asn only                             | 8         | 0.93        | 7.19e-07       | 0.65(14004)         | 0.668(16757)         | -0.092        | 0.019        |
| PGC_SCZ wave2 only                                 | 36        | 0.95        | 0.00043        | 0.859(34850)        | 0.872(44347)         | -0.058        | 0.016        |
| PGC_SCZ wave3 (excl. wave2)                        | 31        | 0.93        | 8.81e-09       | 0.782(32540)        | 0.807(49668)         | -0.082        | 0.014        |
| <b>PGC_SCZ wave3 (incl. wave2)</b>                 | <b>67</b> | <b>0.94</b> | <b>2.9e-11</b> | <b>0.822(67390)</b> | <b>0.838(94015)</b>  | <b>-0.072</b> | <b>0.011</b> |
| Decode – Replication                               | 0         | 1.00        | 0.224          | 0.841(1979)         | 0.843(142627)        | -0.082        | 0.051        |
| <b>PGC_SCZ wave3 (incl. wave2 and replication)</b> | <b>67</b> | <b>0.97</b> | <b>1.6e-11</b> | <b>0.823(69369)</b> | <b>0.841(236642)</b> | <b>-0.071</b> | <b>0.011</b> |

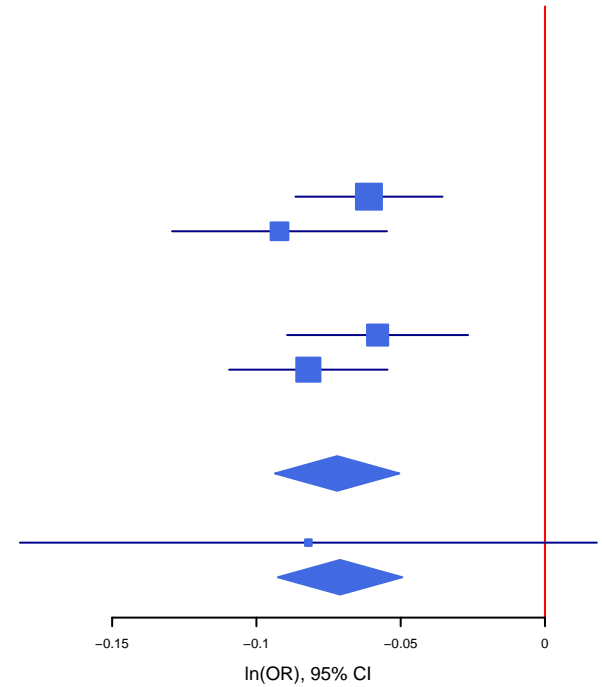

rs7312697

|     |                             |
|-----|-----------------------------|
| T/C | 12:29933069                 |
| --- | het_P: 0.258    het_I: 21.9 |

|                                             | ngt | info | p_value  | f_ca(n)      | f_co(n)       | ln(OR) | STDerr |
|---------------------------------------------|-----|------|----------|--------------|---------------|--------|--------|
| PGC_SCZ wave3 eur only                      | 0   | 0.99 | 5.23e-08 | 0.368(53386) | 0.38(77258)   | -0.049 | 0.009  |
| PGC_SCZ wave3 asn only                      | 0   | 0.97 | 9.78e-05 | 0.271(14004) | 0.287(16757)  | -0.075 | 0.019  |
| PGC_SCZ wave2 only                          | 0   | 0.99 | 3.48e-08 | 0.36(34850)  | 0.377(44347)  | -0.062 | 0.011  |
| PGC_SCZ wave3 (excl. wave2)                 | 0   | 0.98 | 0.000173 | 0.334(32540) | 0.352(49668)  | -0.044 | 0.012  |
| PGC_SCZ wave3 (incl. wave2)                 | 0   | 0.99 | 4.85e-11 | 0.347(67390) | 0.364(94015)  | -0.053 | 0.008  |
| Decode - Replication                        | 0   | 1.00 | 0.147    | 0.409(1979)  | 0.455(142627) | -0.044 | 0.038  |
| PGC_SCZ wave3 (incl. wave2 and replication) | 0   | 0.99 | 1.62e-11 | 0.349(69369) | 0.419(236642) | -0.053 | 0.008  |

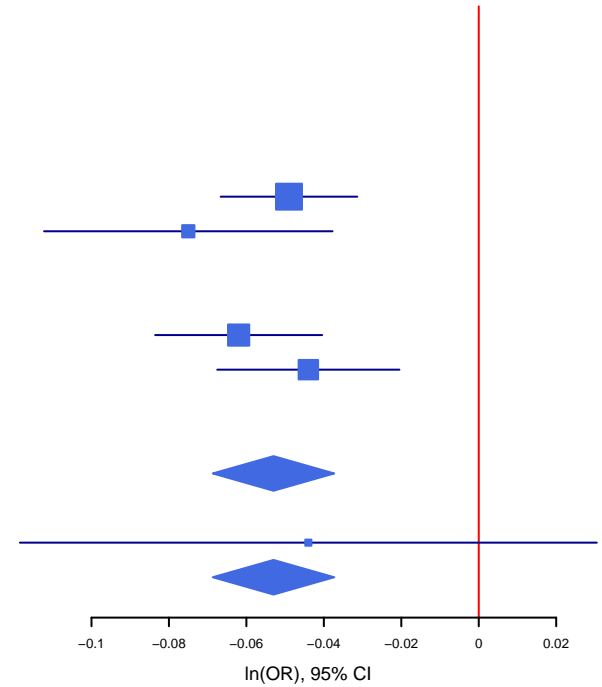

rs505061

C/A

9:22767164

++

het\_P:

0.535

het\_I:

0.0

ngt info p\_value f\_ca(n) f\_co(n) ln(OR) STDerr

PGC\_SCZ wave3 eur only

23 1.00 5.8e-10 0.495(53386) 0.512(77258) -0.053 0.009

PGC\_SCZ wave3 asn only

4 0.97 0.0394 0.543(14004) 0.555(16757) -0.036 0.017

PGC\_SCZ wave2 only

15 0.99 5.09e-07 0.498(34850) 0.512(44347) -0.055 0.011

PGC\_SCZ wave3 (excl. wave2)

12 0.99 3.88e-05 0.513(32540) 0.526(49668) -0.045 0.011

PGC\_SCZ wave3 (incl. wave2)

27 0.99 1.03e-10 0.505(67390) 0.52(94015) -0.05 0.008

Decode - Replication

0 1.00 0.0562 0.468(1979) 0.496(142627) -0.045 0.038

PGC\_SCZ wave3 (incl. wave2 and replication)

27 1.00 1.67e-11 0.504(69369) 0.506(236642) -0.051 0.008

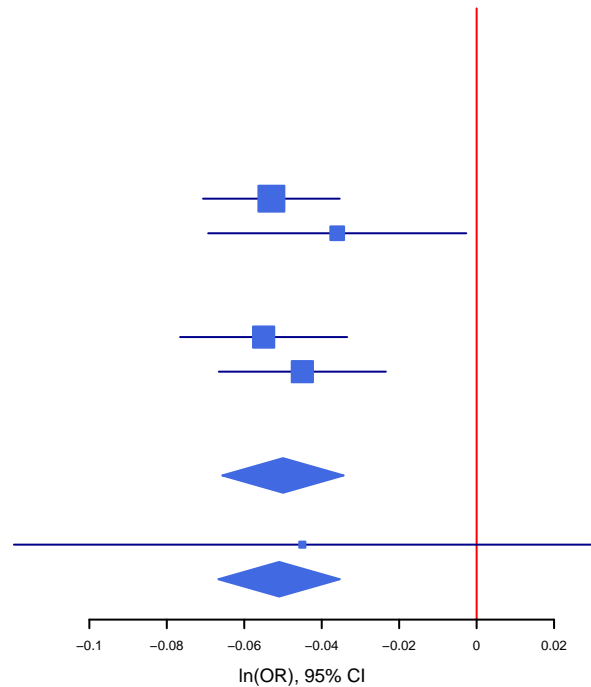

rs12969453

|                                             |     |      |             |              |              |        |        |
|---------------------------------------------|-----|------|-------------|--------------|--------------|--------|--------|
|                                             | A/G |      | 18:52751708 |              |              |        |        |
|                                             | ++  |      | het_P:      |              | 0.129        | het_I: | 56.5   |
|                                             | ngt | info | p_value     | f_ca(n)      | f_co(n)      | ln(OR) | STDerr |
| PGC_SCZ wave3 eur only                      | 0   | 1.01 | 8.52e-14    | 0.605(53386) | 0.588(77258) | 0.065  | 0.009  |
| PGC_SCZ wave3 asn only                      | 0   | 0.98 | 0.531       | 0.406(14004) | 0.398(16757) | 0.011  | 0.018  |
| PGC_SCZ wave2 only                          | 0   | 1.00 | 1.92e-09    | 0.594(34850) | 0.584(44347) | 0.066  | 0.011  |
| PGC_SCZ wave3 (excl. wave2)                 | 0   | 1.00 | 0.000132    | 0.531(32540) | 0.528(49668) | 0.042  | 0.011  |
| PGC_SCZ wave3 (incl. wave2)                 | 0   | 1.00 | 3.53e-12    | 0.564(67390) | 0.554(94015) | 0.054  | 0.008  |
| Decode – Replication                        | 0   | 1.00 | 0.658       | 0.599(1979)  | 0.58(142627) | 0.042  | 0.038  |
| PGC_SCZ wave3 (incl. wave2 and replication) | 0   | 1.00 | 1.71e-11    | 0.565(69369) | 0.57(236642) | 0.051  | 0.008  |

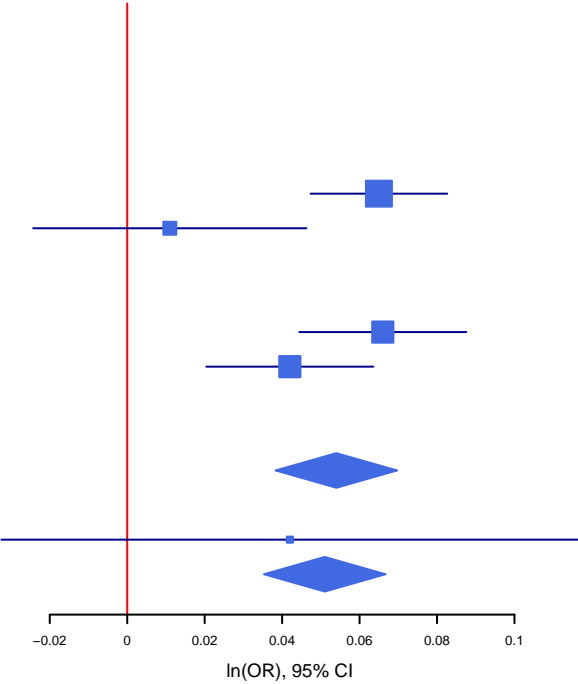

|                                                    |           |             |                 |                     |                      |              |              |
|----------------------------------------------------|-----------|-------------|-----------------|---------------------|----------------------|--------------|--------------|
| rs3770752                                          | A/G       |             | 2:37576136      |                     |                      |              |              |
|                                                    | ++        |             | het_P:          | 0.091               | het_I:               | 65.0         |              |
|                                                    | ngt       | info        | p_value         | f_ca(n)             | f_co(n)              | ln(OR)       | STDerr       |
| PGC_SCZ wave3 eur only                             | 41        | 0.97        | 8.56e-09        | 0.656(53386)        | 0.641(77258)         | 0.053        | 0.009        |
| PGC_SCZ wave3 asn only                             | 5         | 0.91        | 0.000232        | 0.859(14004)        | 0.855(16757)         | 0.096        | 0.026        |
| PGC_SCZ wave2 only                                 | 12        | 0.96        | 0.000162        | 0.667(34850)        | 0.647(44347)         | 0.044        | 0.012        |
| PGC_SCZ wave3 (excl. wave2)                        | 34        | 0.96        | 9.63e-09        | 0.731(32540)        | 0.708(49668)         | 0.073        | 0.013        |
| <b>PGC_SCZ wave3 (incl. wave2)</b>                 | <b>46</b> | <b>0.96</b> | <b>2.86e-11</b> | <b>0.698(67390)</b> | <b>0.68(94015)</b>   | <b>0.057</b> | <b>0.009</b> |
| Decode – Replication                               | 0         | 1.00        | 0.381           | 0.654(1979)         | 0.677(142627)        | 0.073        | 0.04         |
| <b>PGC_SCZ wave3 (incl. wave2 and replication)</b> | <b>46</b> | <b>0.98</b> | <b>1.95e-11</b> | <b>0.697(69369)</b> | <b>0.678(236642)</b> | <b>0.056</b> | <b>0.008</b> |

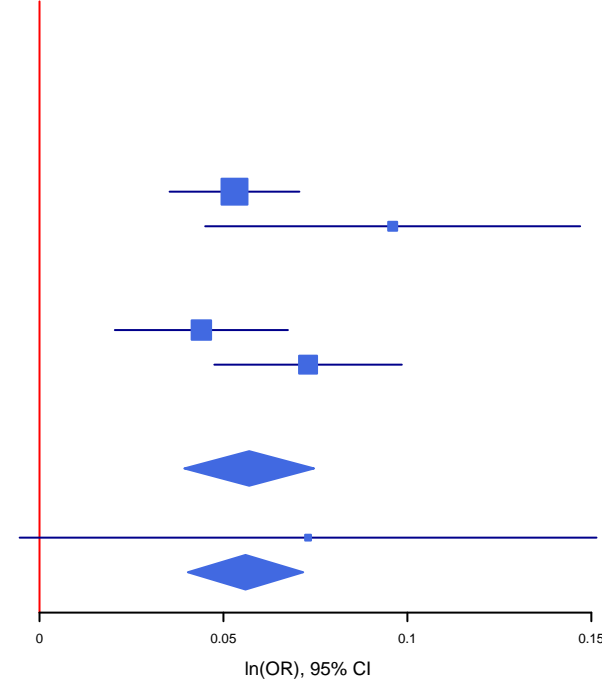

rs61405217

C/T

4:170322312

---

het\_P:

0.587

het\_I:

0.0

| ngt | info | p_value | f_ca(n) | f_co(n) | ln(OR) | STDerr |
|-----|------|---------|---------|---------|--------|--------|
|-----|------|---------|---------|---------|--------|--------|

PGC\_SCZ wave3 eur only

|   |      |          |              |              |      |       |
|---|------|----------|--------------|--------------|------|-------|
| 0 | 1.00 | 7.03e-09 | 0.472(53386) | 0.459(77258) | 0.05 | 0.009 |
|---|------|----------|--------------|--------------|------|-------|

PGC\_SCZ wave3 asn only

|   |      |         |              |              |       |      |
|---|------|---------|--------------|--------------|-------|------|
| 0 | 0.95 | 0.00169 | 0.274(14004) | 0.259(16757) | 0.063 | 0.02 |
|---|------|---------|--------------|--------------|-------|------|

PGC\_SCZ wave2 only

|   |      |          |              |              |       |       |
|---|------|----------|--------------|--------------|-------|-------|
| 0 | 1.00 | 2.78e-07 | 0.461(34850) | 0.451(44347) | 0.056 | 0.011 |
|---|------|----------|--------------|--------------|-------|-------|

PGC\_SCZ wave3 (excl. wave2)

|   |      |          |              |              |       |       |
|---|------|----------|--------------|--------------|-------|-------|
| 0 | 0.98 | 3.87e-05 | 0.399(32540) | 0.398(49668) | 0.047 | 0.012 |
|---|------|----------|--------------|--------------|-------|-------|

**PGC\_SCZ wave3 (incl. wave2)**

|          |             |                 |                     |                     |              |              |
|----------|-------------|-----------------|---------------------|---------------------|--------------|--------------|
| <b>0</b> | <b>0.99</b> | <b>5.39e-11</b> | <b>0.431(67390)</b> | <b>0.423(94015)</b> | <b>0.052</b> | <b>0.008</b> |
|----------|-------------|-----------------|---------------------|---------------------|--------------|--------------|

Decode - Replication

|   |      |       |             |               |       |       |
|---|------|-------|-------------|---------------|-------|-------|
| 0 | 1.00 | 0.229 | 0.437(1979) | 0.436(142627) | 0.047 | 0.038 |
|---|------|-------|-------------|---------------|-------|-------|

**PGC\_SCZ wave3 (incl. wave2 and replication)**

|          |             |                 |                     |                      |              |              |
|----------|-------------|-----------------|---------------------|----------------------|--------------|--------------|
| <b>0</b> | <b>0.99</b> | <b>2.24e-11</b> | <b>0.431(69369)</b> | <b>0.431(236642)</b> | <b>0.052</b> | <b>0.008</b> |
|----------|-------------|-----------------|---------------------|----------------------|--------------|--------------|

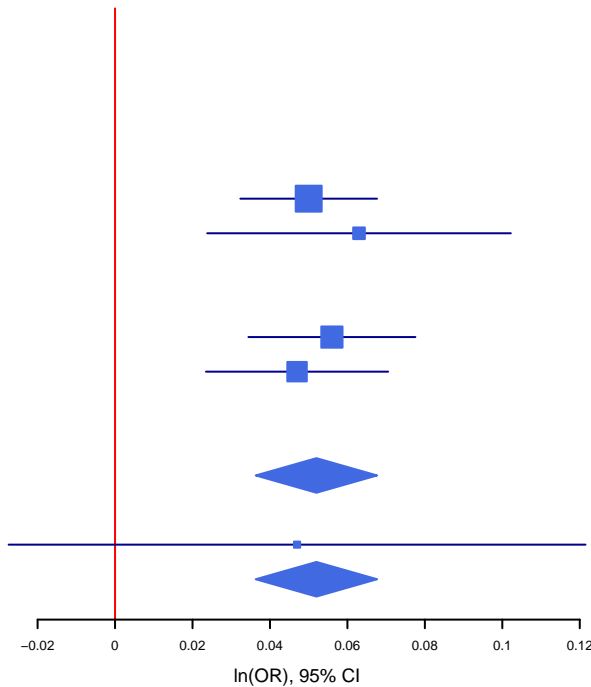



rs77502336                      G/C                      11:123394636  
                                         ++                      het\_P:                      0.131                      het\_I:                      56.2

|  | ngt | info | p_value | f_ca(n) | f_co(n) | ln(OR) | STDerr |
|--|-----|------|---------|---------|---------|--------|--------|
|--|-----|------|---------|---------|---------|--------|--------|

|                        |   |      |          |              |              |        |       |
|------------------------|---|------|----------|--------------|--------------|--------|-------|
| PGC_SCZ wave3 eur only | 6 | 0.99 | 1.25e-08 | 0.672(53386) | 0.686(77258) | -0.053 | 0.009 |
|------------------------|---|------|----------|--------------|--------------|--------|-------|

|                        |   |      |          |              |              |        |       |
|------------------------|---|------|----------|--------------|--------------|--------|-------|
| PGC_SCZ wave3 asn only | 0 | 0.93 | 0.000642 | 0.572(14004) | 0.586(16757) | -0.061 | 0.018 |
|------------------------|---|------|----------|--------------|--------------|--------|-------|

|                    |   |      |          |              |              |        |       |
|--------------------|---|------|----------|--------------|--------------|--------|-------|
| PGC_SCZ wave2 only | 0 | 0.98 | 9.81e-09 | 0.667(34850) | 0.687(44347) | -0.067 | 0.012 |
|--------------------|---|------|----------|--------------|--------------|--------|-------|

|                             |   |      |          |              |              |        |       |
|-----------------------------|---|------|----------|--------------|--------------|--------|-------|
| PGC_SCZ wave3 (excl. wave2) | 6 | 0.97 | 0.000265 | 0.634(32540) | 0.651(49668) | -0.042 | 0.012 |
|-----------------------------|---|------|----------|--------------|--------------|--------|-------|

|                                    |          |             |                 |                     |                     |               |              |
|------------------------------------|----------|-------------|-----------------|---------------------|---------------------|---------------|--------------|
| <b>PGC_SCZ wave3 (incl. wave2)</b> | <b>6</b> | <b>0.98</b> | <b>3.45e-11</b> | <b>0.651(67390)</b> | <b>0.668(94015)</b> | <b>-0.054</b> | <b>0.008</b> |
|------------------------------------|----------|-------------|-----------------|---------------------|---------------------|---------------|--------------|

|                      |   |      |       |             |               |        |      |
|----------------------|---|------|-------|-------------|---------------|--------|------|
| Decode - Replication | 0 | 1.00 | 0.428 | 0.666(1979) | 0.643(142627) | -0.042 | 0.04 |
|----------------------|---|------|-------|-------------|---------------|--------|------|

|                                                    |          |             |                 |                     |                      |               |              |
|----------------------------------------------------|----------|-------------|-----------------|---------------------|----------------------|---------------|--------------|
| <b>PGC_SCZ wave3 (incl. wave2 and replication)</b> | <b>6</b> | <b>0.99</b> | <b>2.56e-11</b> | <b>0.651(69369)</b> | <b>0.653(236642)</b> | <b>-0.054</b> | <b>0.008</b> |
|----------------------------------------------------|----------|-------------|-----------------|---------------------|----------------------|---------------|--------------|

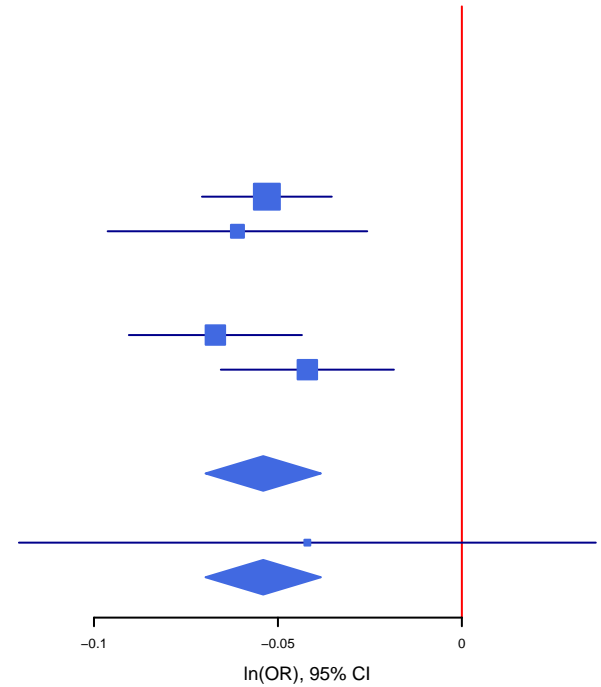

|                                                    |          |             |                 |                     |                      |              |             |
|----------------------------------------------------|----------|-------------|-----------------|---------------------|----------------------|--------------|-------------|
| rs9597388                                          | G/A      |             | 13:56928696     |                     |                      |              |             |
|                                                    | --       |             | het_P:          |                     | 0.437                | het_I:       | 0.0         |
|                                                    | ngt      | info        | p_value         | f_ca(n)             | f_co(n)              | ln(OR)       | STDerr      |
| PGC_SCZ wave3 eur only                             | 0        | 0.98        | 2.84e-07        | 0.82(53386)         | 0.813(77258)         | 0.058        | 0.011       |
| PGC_SCZ wave3 asn only                             | 0        | 0.96        | 3.92e-06        | 0.836(14004)        | 0.823(16757)         | 0.106        | 0.023       |
| PGC_SCZ wave2 only                                 | 0        | 0.99        | 2.89e-05        | 0.823(34850)        | 0.816(44347)         | 0.059        | 0.014       |
| PGC_SCZ wave3 (excl. wave2)                        | 0        | 0.97        | 1.9e-07         | 0.824(32540)        | 0.813(49668)         | 0.075        | 0.014       |
| <b>PGC_SCZ wave3 (incl. wave2)</b>                 | <b>0</b> | <b>0.98</b> | <b>3.24e-11</b> | <b>0.823(67390)</b> | <b>0.814(94015)</b>  | <b>0.067</b> | <b>0.01</b> |
| Decode – Replication                               | 0        | 1.00        | 0.418           | 0.796(1979)         | 0.787(142627)        | 0.075        | 0.047       |
| <b>PGC_SCZ wave3 (incl. wave2 and replication)</b> | <b>0</b> | <b>0.99</b> | <b>3.22e-11</b> | <b>0.822(69369)</b> | <b>0.798(236642)</b> | <b>0.065</b> | <b>0.01</b> |

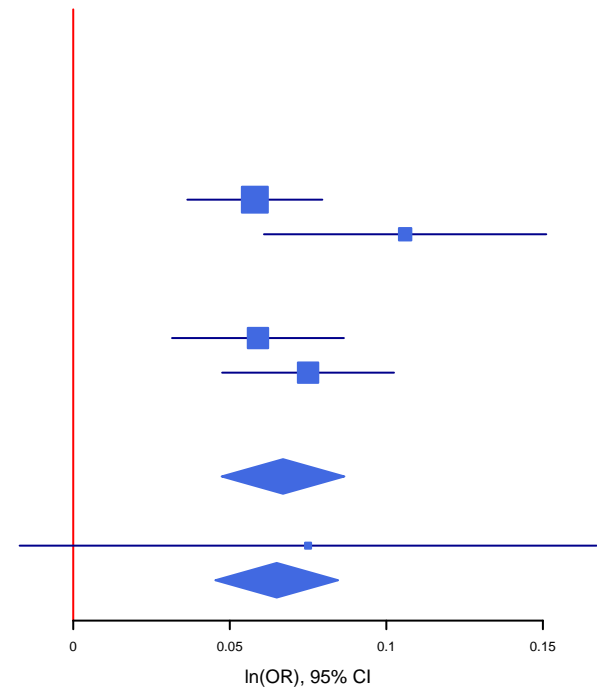

|                                                    |           |             |                 |                     |                      |               |              |
|----------------------------------------------------|-----------|-------------|-----------------|---------------------|----------------------|---------------|--------------|
| rs6732355                                          | C/A       |             | 2:104984277     |                     |                      |               |              |
|                                                    | ++        |             | het_P:          | 0.189               | het_I:               | 42.0          |              |
|                                                    | ngt       | info        | p_value         | f_ca(n)             | f_co(n)              | ln(OR)        | STDerr       |
| PGC_SCZ wave3 eur only                             | 16        | 1.00        | 9.54e-07        | 0.813(53386)        | 0.821(77258)         | -0.054        | 0.011        |
| PGC_SCZ wave3 asn only                             | 5         | 0.98        | 8.54e-05        | 0.612(14004)        | 0.627(16757)         | -0.069        | 0.018        |
| PGC_SCZ wave2 only                                 | 16        | 1.00        | 0.00102         | 0.803(34850)        | 0.816(44347)         | -0.045        | 0.014        |
| PGC_SCZ wave3 (excl. wave2)                        | 5         | 0.99        | 4.66e-08        | 0.738(32540)        | 0.759(49668)         | -0.07         | 0.013        |
| <b>PGC_SCZ wave3 (incl. wave2)</b>                 | <b>21</b> | <b>1.00</b> | <b>4.36e-10</b> | <b>0.771(67390)</b> | <b>0.786(94015)</b>  | <b>-0.059</b> | <b>0.009</b> |
| Decode – Replication                               | 0         | 1.00        | 0.00776         | 0.842(1979)         | 0.833(142627)        | -0.07         | 0.049        |
| <b>PGC_SCZ wave3 (incl. wave2 and replication)</b> | <b>21</b> | <b>1.00</b> | <b>3.3e-11</b>  | <b>0.773(69369)</b> | <b>0.814(236642)</b> | <b>-0.061</b> | <b>0.009</b> |

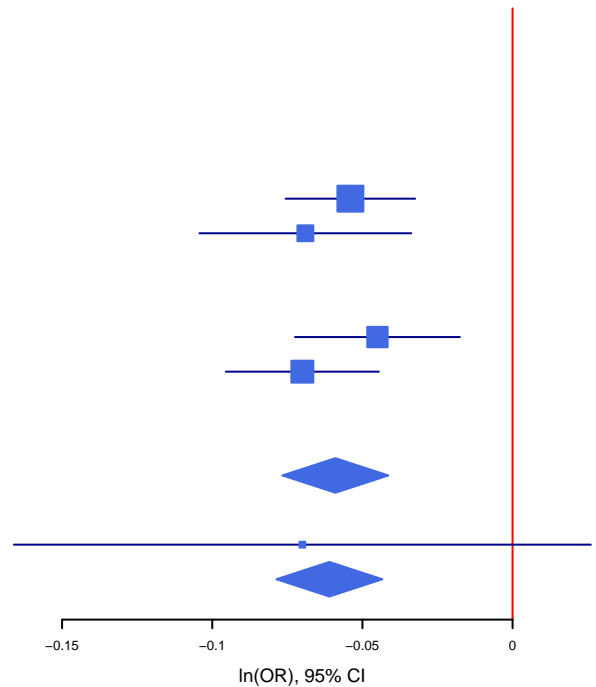

| rs4937935                                          | A/T      |             | 11:134580591    |                     |                      |               |              |
|----------------------------------------------------|----------|-------------|-----------------|---------------------|----------------------|---------------|--------------|
|                                                    | —        |             | het_P:          |                     | 0.453                | het_I:        | 0.0          |
|                                                    | ngt      | info        | p_value         | f_ca(n)             | f_co(n)              | ln(OR)        | STDerr       |
| PGC_SCZ wave3 eur only                             | 0        | 0.98        | 1.85e-08        | 0.563(53386)        | 0.574(77258)         | -0.049        | 0.009        |
| PGC_SCZ wave3 asn only                             | 4        | 0.95        | 0.000118        | 0.245(14004)        | 0.25(16757)          | -0.079        | 0.02         |
| PGC_SCZ wave2 only                                 | 0        | 0.98        | 1.42e-05        | 0.545(34850)        | 0.566(44347)         | -0.048        | 0.011        |
| PGC_SCZ wave3 (excl. wave2)                        | 4        | 0.97        | 2.75e-07        | 0.445(32540)        | 0.472(49668)         | -0.06         | 0.012        |
| <b>PGC_SCZ wave3 (incl. wave2)</b>                 | <b>4</b> | <b>0.97</b> | <b>2.3e-11</b>  | <b>0.497(67390)</b> | <b>0.516(94015)</b>  | <b>-0.054</b> | <b>0.008</b> |
| Decode – Replication                               | 0        | 1.00        | 0.583           | 0.564(1979)         | 0.563(142627)        | -0.06         | 0.038        |
| <b>PGC_SCZ wave3 (incl. wave2 and replication)</b> | <b>4</b> | <b>0.99</b> | <b>3.49e-11</b> | <b>0.499(69369)</b> | <b>0.544(236642)</b> | <b>-0.053</b> | <b>0.008</b> |

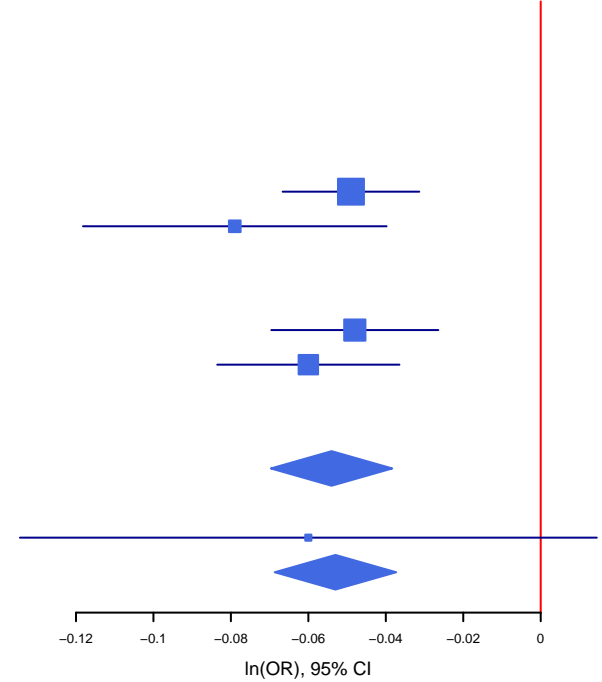

| rs4319542                                          | C/G      |             | 11:113451229    |                     |                      |              |              |
|----------------------------------------------------|----------|-------------|-----------------|---------------------|----------------------|--------------|--------------|
|                                                    | ++       |             | het_P:          |                     | 0.31                 | het_I:       | 3.2          |
|                                                    | ngt      | info        | p_value         | f_ca(n)             | f_co(n)              | ln(OR)       | STDerr       |
| PGC_SCZ wave3 eur only                             | 0        | 0.95        | 3.3e-10         | 0.575(53386)        | 0.565(77258)         | 0.056        | 0.009        |
| PGC_SCZ wave3 asn only                             | 0        | 0.90        | 0.587           | 0.717(14004)        | 0.711(16757)         | 0.011        | 0.02         |
| PGC_SCZ wave2 only                                 | 0        | 0.96        | 5.39e-07        | 0.588(34850)        | 0.575(44347)         | 0.056        | 0.011        |
| PGC_SCZ wave3 (excl. wave2)                        | 0        | 0.93        | 0.000718        | 0.622(32540)        | 0.605(49668)         | 0.04         | 0.012        |
| <b>PGC_SCZ wave3 (incl. wave2)</b>                 | <b>0</b> | <b>0.94</b> | <b>2.53e-09</b> | <b>0.605(67390)</b> | <b>0.591(94015)</b>  | <b>0.048</b> | <b>0.008</b> |
| Decode – Replication                               | 0        | 1.00        | 0.000171        | 0.544(1979)         | 0.53(142627)         | 0.04         | 0.038        |
| <b>PGC_SCZ wave3 (incl. wave2 and replication)</b> | <b>0</b> | <b>0.98</b> | <b>3.57e-11</b> | <b>0.603(69369)</b> | <b>0.554(236642)</b> | <b>0.052</b> | <b>0.008</b> |

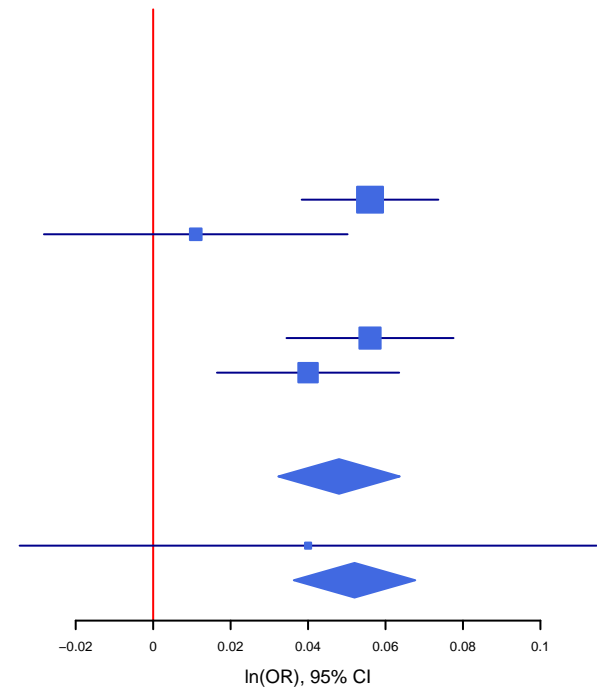

| rs4793888                                          | G/A      |             | 17:55737740     |                     |                      |               |             |
|----------------------------------------------------|----------|-------------|-----------------|---------------------|----------------------|---------------|-------------|
|                                                    | ++       |             | het_P:          | 0.622               | het_I:               | 0.0           |             |
|                                                    | ngt      | info        | p_value         | f_ca(n)             | f_co(n)              | ln(OR)        | STDerr      |
| PGC_SCZ wave3 eur only                             | 0        | 0.99        | 9.69e-07        | 0.828(53386)        | 0.835(77258)         | -0.056        | 0.012       |
| PGC_SCZ wave3 asn only                             | 0        | 0.95        | 7.01e-05        | 0.609(14004)        | 0.619(16757)         | -0.072        | 0.018       |
| PGC_SCZ wave2 only                                 | 0        | 0.99        | 8.41e-05        | 0.813(34850)        | 0.827(44347)         | -0.056        | 0.014       |
| PGC_SCZ wave3 (excl. wave2)                        | 0        | 0.97        | 9.27e-07        | 0.751(32540)        | 0.769(49668)         | -0.065        | 0.013       |
| <b>PGC_SCZ wave3 (incl. wave2)</b>                 | <b>0</b> | <b>0.98</b> | <b>3.63e-10</b> | <b>0.783(67390)</b> | <b>0.797(94015)</b>  | <b>-0.061</b> | <b>0.01</b> |
| Decode – Replication                               | 0        | 1.00        | 0.0204          | 0.814(1979)         | 0.825(142627)        | -0.065        | 0.048       |
| <b>PGC_SCZ wave3 (incl. wave2 and replication)</b> | <b>0</b> | <b>0.99</b> | <b>3.72e-11</b> | <b>0.784(69369)</b> | <b>0.814(236642)</b> | <b>-0.063</b> | <b>0.01</b> |

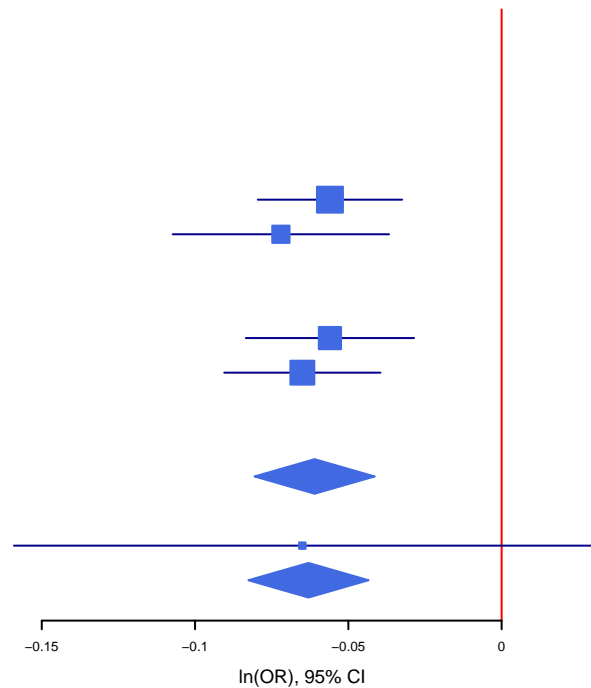

rs35164357

C/T

5:109146775

++

het\_P:

0.317

het\_I:

0.3

| ngt | info | p_value | f_ca(n) | f_co(n) | ln(OR) | STDerr |
|-----|------|---------|---------|---------|--------|--------|
|-----|------|---------|---------|---------|--------|--------|

PGC\_SCZ wave3 eur only

|   |      |          |             |              |        |       |
|---|------|----------|-------------|--------------|--------|-------|
| 0 | 1.01 | 1.68e-07 | 0.82(53386) | 0.828(77258) | -0.059 | 0.011 |
|---|------|----------|-------------|--------------|--------|-------|

PGC\_SCZ wave3 asn only

|   |      |          |              |              |        |       |
|---|------|----------|--------------|--------------|--------|-------|
| 0 | 0.96 | 0.000371 | 0.361(14004) | 0.368(16757) | -0.065 | 0.018 |
|---|------|----------|--------------|--------------|--------|-------|

PGC\_SCZ wave2 only

|   |      |          |              |              |        |       |
|---|------|----------|--------------|--------------|--------|-------|
| 0 | 1.01 | 3.97e-07 | 0.791(34850) | 0.814(44347) | -0.071 | 0.014 |
|---|------|----------|--------------|--------------|--------|-------|

PGC\_SCZ wave3 (excl. wave2)

|   |      |          |              |              |        |       |
|---|------|----------|--------------|--------------|--------|-------|
| 0 | 0.99 | 9.39e-05 | 0.654(32540) | 0.685(49668) | -0.052 | 0.013 |
|---|------|----------|--------------|--------------|--------|-------|

**PGC\_SCZ wave3 (incl. wave2)**

|          |             |                 |                     |                     |               |             |
|----------|-------------|-----------------|---------------------|---------------------|---------------|-------------|
| <b>0</b> | <b>1.00</b> | <b>2.59e-10</b> | <b>0.725(67390)</b> | <b>0.746(94015)</b> | <b>-0.061</b> | <b>0.01</b> |
|----------|-------------|-----------------|---------------------|---------------------|---------------|-------------|

Decode - Replication

|   |      |      |             |               |        |       |
|---|------|------|-------------|---------------|--------|-------|
| 0 | 1.00 | 0.03 | 0.825(1979) | 0.826(142627) | -0.052 | 0.048 |
|---|------|------|-------------|---------------|--------|-------|

**PGC\_SCZ wave3 (incl. wave2 and replication)**

|          |             |                 |                     |                      |               |              |
|----------|-------------|-----------------|---------------------|----------------------|---------------|--------------|
| <b>0</b> | <b>1.00</b> | <b>3.93e-11</b> | <b>0.728(69369)</b> | <b>0.794(236642)</b> | <b>-0.062</b> | <b>0.009</b> |
|----------|-------------|-----------------|---------------------|----------------------|---------------|--------------|

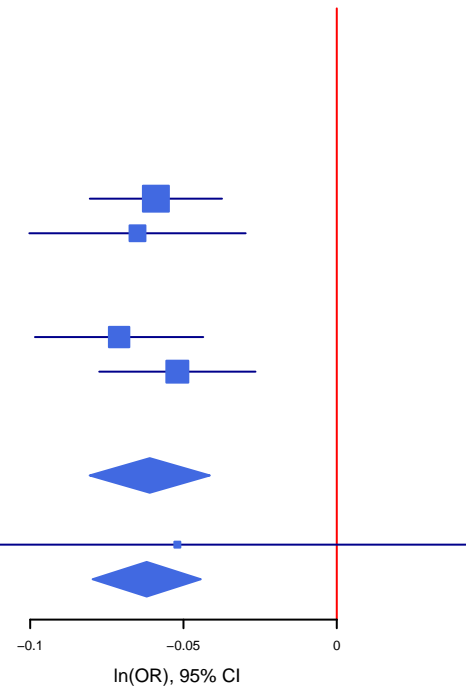

8:111580570

—

het\_P:

0.033

het\_l:

77.9

|                                                    | ngt       | info        | p_value         | f_ca(n)             | f_co(n)             | ln(OR)        | STDerr      |
|----------------------------------------------------|-----------|-------------|-----------------|---------------------|---------------------|---------------|-------------|
| PGC_SCZ wave3 eur only                             | 12        | 1.00        | 4.97e−10        | 0.831(53386)        | 0.839(77258)        | −0.072        | 0.012       |
| PGC_SCZ wave3 asn only                             | 4         | 1.00        | 0.0174          | 0.845(14004)        | 0.851(16757)        | −0.056        | 0.024       |
| PGC_SCZ wave2 only                                 | 12        | 1.00        | 5.41e−10        | 0.832(34850)        | 0.844(44347)        | −0.091        | 0.015       |
| PGC_SCZ wave3 (excl. wave2)                        | 4         | 1.00        | 0.00156         | 0.836(32540)        | 0.839(49668)        | −0.047        | 0.015       |
| <b>PGC_SCZ wave3 (incl. wave2)</b>                 | <b>16</b> | <b>1.00</b> | <b>3.3e−11</b>  | <b>0.834(67390)</b> | <b>0.841(94015)</b> | <b>−0.069</b> | <b>0.01</b> |
| Decode – Replication                               | 0         | 1.00        | 0.657           | 0.847(1979)         | 0.806(142627)       | −0.047        | 0.051       |
| <b>PGC_SCZ wave3 (incl. wave2 and replication)</b> | <b>16</b> | <b>1.00</b> | <b>4.15e−11</b> | <b>0.834(69369)</b> | <b>0.82(236642)</b> | <b>−0.067</b> | <b>0.01</b> |

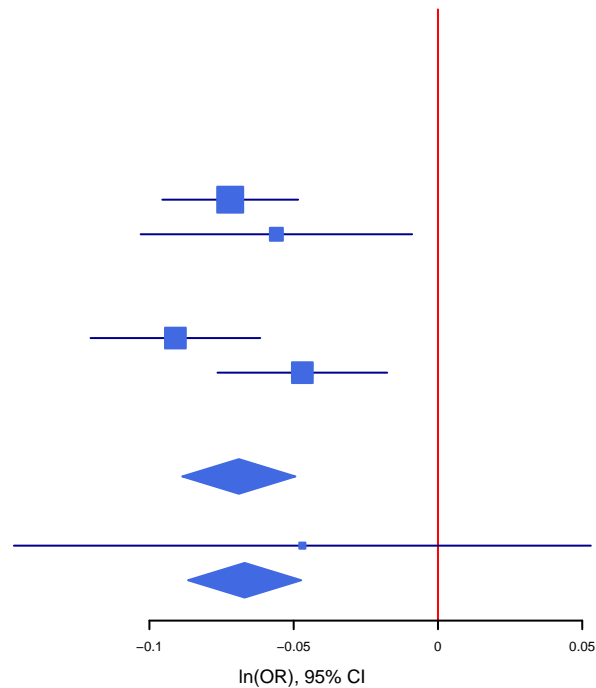



| <b>rs1347692</b>                                   |          |             | <b>C/T</b>      |                     | <b>2:201297861</b>   |             |              |     |  |
|----------------------------------------------------|----------|-------------|-----------------|---------------------|----------------------|-------------|--------------|-----|--|
|                                                    |          |             | --              |                     | het_P:               | 0.506       | het_I:       | 0.0 |  |
|                                                    | ngt      | info        | p_value         | f_ca(n)             | f_co(n)              | ln(OR)      | STDerr       |     |  |
| PGC_SCZ wave3 eur only                             | 1        | 0.99        | 1.14e-06        | 0.476(53386)        | 0.463(77258)         | 0.042       | 0.009        |     |  |
| PGC_SCZ wave3 asn only                             | 0        | 0.97        | 6.23e-06        | 0.752(14004)        | 0.736(16757)         | 0.089       | 0.02         |     |  |
| PGC_SCZ wave2 only                                 | 1        | 0.99        | 5.77e-07        | 0.489(34850)        | 0.467(44347)         | 0.055       | 0.011        |     |  |
| PGC_SCZ wave3 (excl. wave2)                        | 0        | 0.98        | 0.000121        | 0.581(32540)        | 0.552(49668)         | 0.044       | 0.012        |     |  |
| <b>PGC_SCZ wave3 (incl. wave2)</b>                 | <b>1</b> | <b>0.98</b> | <b>3.6e-10</b>  | <b>0.533(67390)</b> | <b>0.512(94015)</b>  | <b>0.05</b> | <b>0.008</b> |     |  |
| Decode - Replication                               | 0        | 1.00        | 0.099           | 0.494(1979)         | 0.506(142627)        | 0.044       | 0.038        |     |  |
| <b>PGC_SCZ wave3 (incl. wave2 and replication)</b> | <b>1</b> | <b>0.99</b> | <b>7.64e-11</b> | <b>0.532(69369)</b> | <b>0.508(236642)</b> | <b>0.05</b> | <b>0.008</b> |     |  |

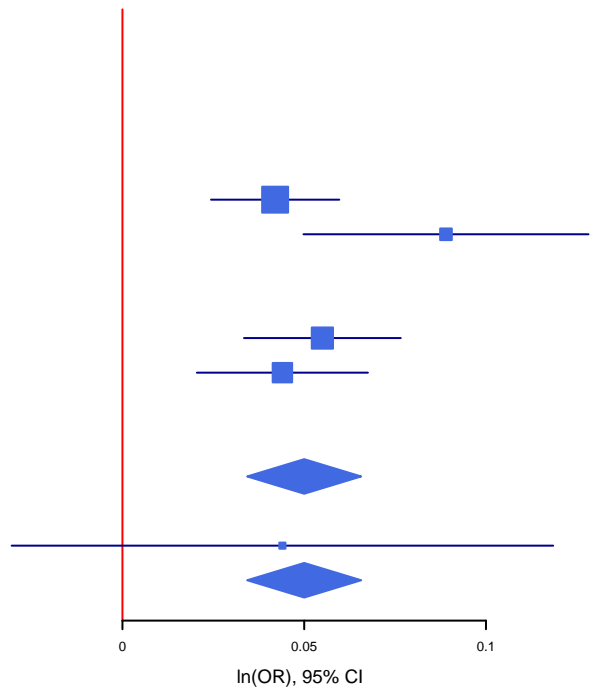

|                                                    |           |             |                 |                     |                     |               |             |
|----------------------------------------------------|-----------|-------------|-----------------|---------------------|---------------------|---------------|-------------|
| rs1593304                                          | A/G       |             | 7:131619847     |                     |                     |               |             |
|                                                    | —         |             | het_P:          | 0.581               | het_I:              | 0.0           |             |
|                                                    | ngt       | info        | p_value         | f_ca(n)             | f_co(n)             | ln(OR)        | STDerr      |
| PGC_SCZ wave3 eur only                             | 57        | 0.96        | 7.45e-09        | 0.193(53386)        | 0.199(77258)        | -0.064        | 0.011       |
| PGC_SCZ wave3 asn only                             | 9         | 0.88        | 0.00954         | 0.146(14004)        | 0.152(16757)        | -0.065        | 0.025       |
| PGC_SCZ wave2 only                                 | 29        | 0.95        | 9.2e-07         | 0.186(34850)        | 0.194(44347)        | -0.07         | 0.014       |
| PGC_SCZ wave3 (excl. wave2)                        | 37        | 0.94        | 5.28e-05        | 0.18(32540)         | 0.188(49668)        | -0.058        | 0.014       |
| <b>PGC_SCZ wave3 (incl. wave2)</b>                 | <b>66</b> | <b>0.94</b> | <b>2.37e-10</b> | <b>0.183(67390)</b> | <b>0.191(94015)</b> | <b>-0.064</b> | <b>0.01</b> |
| Decode – Replication                               | 0         | 1.00        | 0.163           | 0.198(1979)         | 0.206(142627)       | -0.058        | 0.048       |
| <b>PGC_SCZ wave3 (incl. wave2 and replication)</b> | <b>66</b> | <b>0.98</b> | <b>7.66e-11</b> | <b>0.183(69369)</b> | <b>0.2(236642)</b>  | <b>-0.064</b> | <b>0.01</b> |

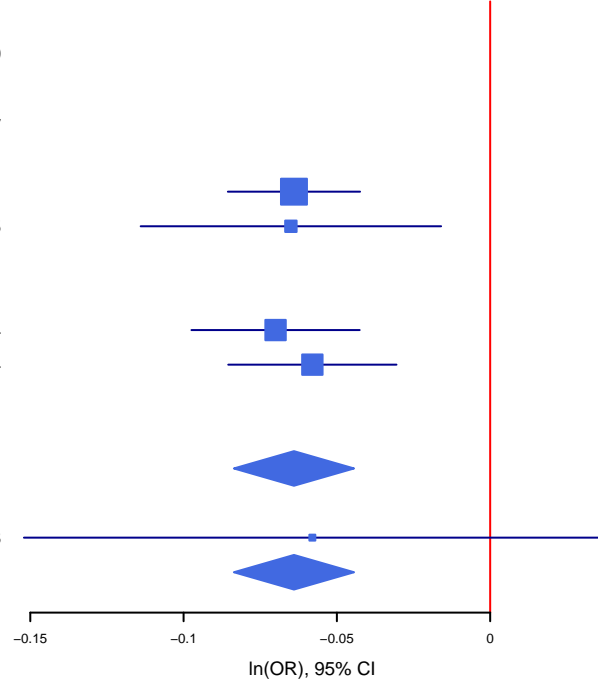

|                                                    |          |             |                 |                     |                      |             |              |  |  |
|----------------------------------------------------|----------|-------------|-----------------|---------------------|----------------------|-------------|--------------|--|--|
| rs2238304                                          |          |             |                 |                     |                      |             |              |  |  |
|                                                    | A/T      |             |                 | 15:89843950         |                      |             |              |  |  |
|                                                    | ++       |             |                 | het_P:              | 0.913                | het_I:      | 0.0          |  |  |
|                                                    | ngt      | info        | p_value         | f_ca(n)             | f_co(n)              | ln(OR)      | STDerr       |  |  |
| PGC_SCZ wave3 eur only                             | 0        | 0.99        | 5.44e-08        | 0.539(53386)        | 0.528(77258)         | 0.047       | 0.009        |  |  |
| PGC_SCZ wave3 asn only                             | 0        | 0.96        | 0.000661        | 0.569(14004)        | 0.554(16757)         | 0.059       | 0.018        |  |  |
| PGC_SCZ wave2 only                                 | 0        | 1.00        | 3.55e-06        | 0.541(34850)        | 0.527(44347)         | 0.05        | 0.011        |  |  |
| PGC_SCZ wave3 (excl. wave2)                        | 0        | 0.97        | 1.14e-05        | 0.551(32540)        | 0.537(49668)         | 0.049       | 0.011        |  |  |
| <b>PGC_SCZ wave3 (incl. wave2)</b>                 | <b>0</b> | <b>0.98</b> | <b>1.73e-10</b> | <b>0.546(67390)</b> | <b>0.533(94015)</b>  | <b>0.05</b> | <b>0.008</b> |  |  |
| Decode – Replication                               | 0        | 1.00        | 0.181           | 0.504(1979)         | 0.505(142627)        | 0.049       | 0.037        |  |  |
| <b>PGC_SCZ wave3 (incl. wave2 and replication)</b> | <b>0</b> | <b>0.99</b> | <b>8.13e-11</b> | <b>0.545(69369)</b> | <b>0.516(236642)</b> | <b>0.05</b> | <b>0.008</b> |  |  |

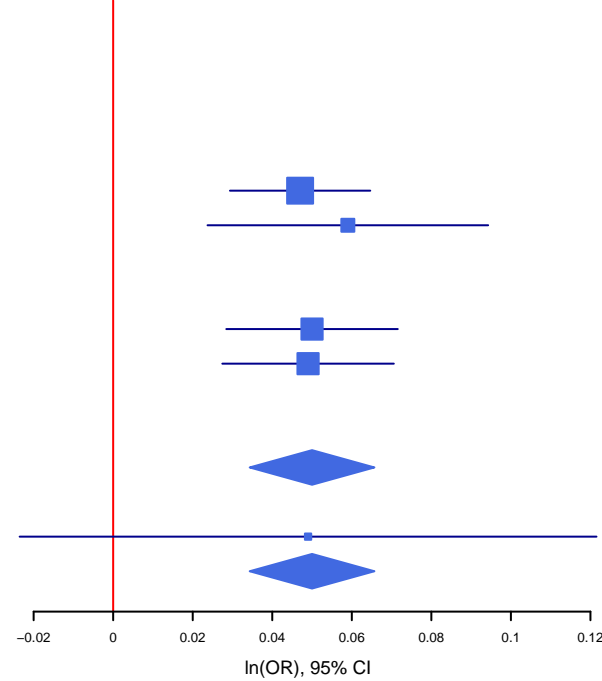

rs2532240

|     |                         |
|-----|-------------------------|
| C/T | 17:44265839             |
| --- | het_P: 0.717 het_I: 0.0 |

|                                             | ngt | info | p_value  | f_ca(n)      | f_co(n)       | ln(OR) | STDerr |
|---------------------------------------------|-----|------|----------|--------------|---------------|--------|--------|
| PGC_SCZ wave3 eur only                      | 5   | 0.93 | 2.58e-11 | 0.61(53386)  | 0.596(77258)  | 0.061  | 0.009  |
| PGC_SCZ wave3 asn only                      | 0   | 0.75 | 0.523    | 0.552(14004) | 0.555(16757)  | 0.013  | 0.02   |
| PGC_SCZ wave2 only                          | 0   | 0.91 | 2.01e-06 | 0.607(34850) | 0.601(44347)  | 0.055  | 0.012  |
| PGC_SCZ wave3 (excl. wave2)                 | 5   | 0.89 | 3e-05    | 0.588(32540) | 0.578(49668)  | 0.049  | 0.012  |
| PGC_SCZ wave3 (incl. wave2)                 | 5   | 0.90 | 2.72e-10 | 0.598(67390) | 0.589(94015)  | 0.052  | 0.008  |
| Decode - Replication                        | 0   | 1.00 | 0.0874   | 0.625(1979)  | 0.608(142627) | 0.049  | 0.039  |
| PGC_SCZ wave3 (incl. wave2 and replication) | 5   | 0.96 | 8.3e-11  | 0.599(69369) | 0.6(236642)   | 0.053  | 0.008  |

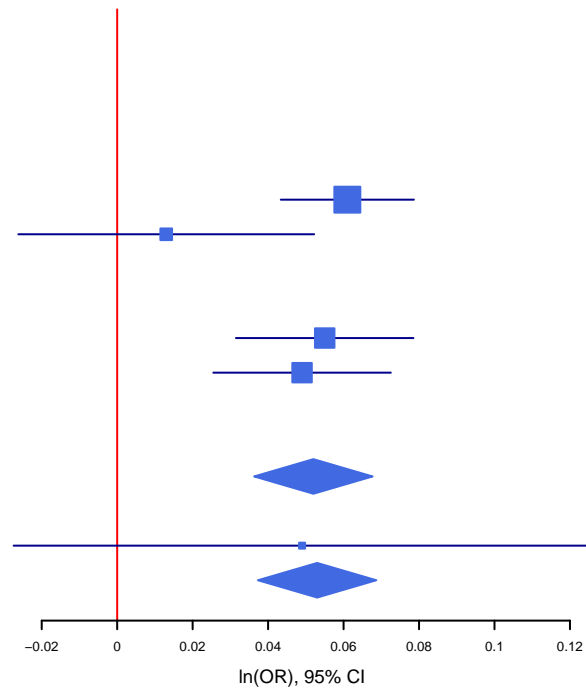

rs6577597

|     |                         |
|-----|-------------------------|
| A/G | 3:17871326              |
| —   | het_P: 0.839 het_I: 0.0 |

|                                             | ngt | info | p_value  | f_ca(n)      | f_co(n)       | ln(OR) | STDerr |
|---------------------------------------------|-----|------|----------|--------------|---------------|--------|--------|
| PGC_SCZ wave3 eur only                      | 13  | 1.00 | 6.18e-10 | 0.506(53386) | 0.517(77258)  | -0.053 | 0.009  |
| PGC_SCZ wave3 asn only                      | 2   | 0.89 | 0.519    | 0.055(14004) | 0.05(16757)   | -0.031 | 0.049  |
| PGC_SCZ wave2 only                          | 13  | 1.00 | 9.47e-07 | 0.477(34850) | 0.503(44347)  | -0.054 | 0.011  |
| PGC_SCZ wave3 (excl. wave2)                 | 2   | 0.96 | 0.000141 | 0.342(32540) | 0.372(49668)  | -0.051 | 0.013  |
| PGC_SCZ wave3 (incl. wave2)                 | 15  | 0.98 | 5.52e-10 | 0.412(67390) | 0.434(94015)  | -0.053 | 0.008  |
| Decode – Replication                        | 0   | 1.00 | 0.0426   | 0.526(1979)  | 0.48(142627)  | -0.051 | 0.038  |
| PGC_SCZ wave3 (incl. wave2 and replication) | 15  | 0.99 | 9.07e-11 | 0.415(69369) | 0.461(236642) | -0.054 | 0.008  |

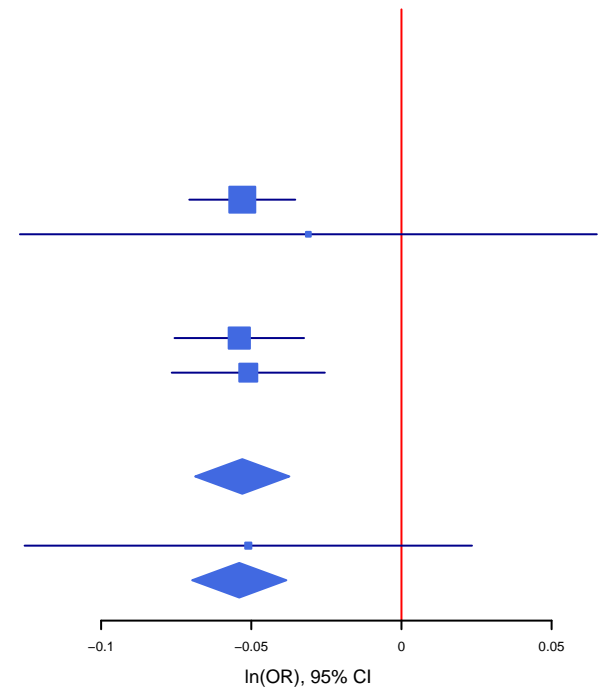

rs72934602

G/A

18:53568458

---

het\_P:

0.011

het\_I:

84.6

|  | ngt | info | p_value | f_ca(n) | f_co(n) | ln(OR) | STDerr |
|--|-----|------|---------|---------|---------|--------|--------|
|--|-----|------|---------|---------|---------|--------|--------|

PGC\_SCZ wave3 eur only

|   |      |          |              |              |       |       |
|---|------|----------|--------------|--------------|-------|-------|
| 6 | 0.98 | 2.34e-10 | 0.927(53386) | 0.918(77258) | 0.104 | 0.016 |
|---|------|----------|--------------|--------------|-------|-------|

PGC\_SCZ wave3 asn only

|     |     |     |          |          |     |     |
|-----|-----|-----|----------|----------|-----|-----|
| nan | nan | nan | nan(nan) | nan(nan) | nan | nan |
|-----|-----|-----|----------|----------|-----|-----|

PGC\_SCZ wave2 only

|   |      |          |              |              |       |       |
|---|------|----------|--------------|--------------|-------|-------|
| 0 | 0.99 | 6.56e-11 | 0.928(32998) | 0.918(43387) | 0.137 | 0.021 |
|---|------|----------|--------------|--------------|-------|-------|

PGC\_SCZ wave3 (excl. wave2)

|   |      |        |              |             |       |       |
|---|------|--------|--------------|-------------|-------|-------|
| 6 | 0.96 | 0.0471 | 0.927(21378) | 0.92(34871) | 0.052 | 0.026 |
|---|------|--------|--------------|-------------|-------|-------|

PGC\_SCZ wave3 (incl. wave2)

|   |      |          |              |              |       |       |
|---|------|----------|--------------|--------------|-------|-------|
| 6 | 0.97 | 2.47e-10 | 0.928(54376) | 0.919(78258) | 0.103 | 0.016 |
|---|------|----------|--------------|--------------|-------|-------|

Decode - Replication

|   |      |       |            |               |       |       |
|---|------|-------|------------|---------------|-------|-------|
| 0 | 1.00 | 0.184 | 0.91(1979) | 0.895(142627) | 0.052 | 0.066 |
|---|------|-------|------------|---------------|-------|-------|

PGC\_SCZ wave3 (incl. wave2 and replication)

|   |      |          |              |               |       |       |
|---|------|----------|--------------|---------------|-------|-------|
| 6 | 0.99 | 1.01e-10 | 0.927(56355) | 0.903(220885) | 0.102 | 0.016 |
|---|------|----------|--------------|---------------|-------|-------|

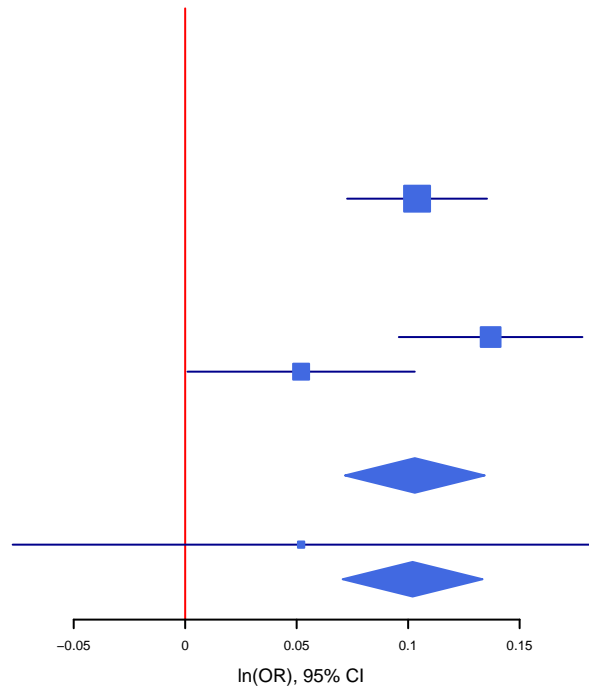

|                                                    |          |             |                 |                    |                      |               |              |
|----------------------------------------------------|----------|-------------|-----------------|--------------------|----------------------|---------------|--------------|
| rs7938083                                          | C/A      |             | 11:57493622     |                    |                      |               |              |
|                                                    | ++       |             | het_P:          |                    | 0.968                | het_I:        | 0.0          |
|                                                    | ngt      | info        | p_value         | f_ca(n)            | f_co(n)              | ln(OR)        | STDerr       |
| PGC_SCZ wave3 eur only                             | 0        | 1.00        | 1.01e-08        | 0.661(53386)       | 0.671(77258)         | -0.052        | 0.009        |
| PGC_SCZ wave3 asn only                             | 0        | 0.94        | 0.0576          | 0.895(14004)       | 0.903(16757)         | -0.055        | 0.029        |
| PGC_SCZ wave2 only                                 | 0        | 1.01        | 4.79e-06        | 0.67(34850)        | 0.674(44347)         | -0.053        | 0.012        |
| PGC_SCZ wave3 (excl. wave2)                        | 0        | 0.98        | 8.29e-05        | 0.752(32540)       | 0.747(49668)         | -0.052        | 0.013        |
| <b>PGC_SCZ wave3 (incl. wave2)</b>                 | <b>0</b> | <b>0.99</b> | <b>1.6e-09</b>  | <b>0.71(67390)</b> | <b>0.713(94015)</b>  | <b>-0.052</b> | <b>0.009</b> |
| Decode – Replication                               | 0        | 1.00        | 0.00639         | 0.706(1979)        | 0.67(142627)         | -0.052        | 0.041        |
| <b>PGC_SCZ wave3 (incl. wave2 and replication)</b> | <b>0</b> | <b>1.00</b> | <b>1.04e-10</b> | <b>0.71(69369)</b> | <b>0.687(236642)</b> | <b>-0.055</b> | <b>0.008</b> |

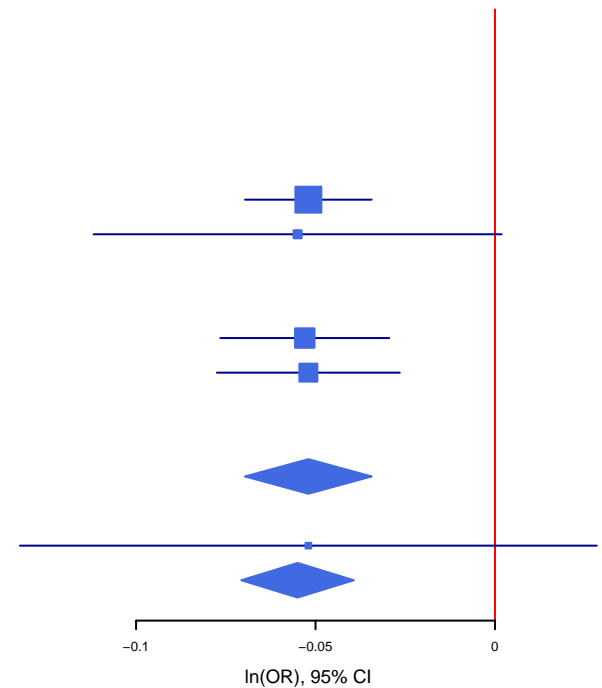

rs634940

G/T

6:93077500

++

het\_P:

0.658

het\_I:

0.0

| ngt | info | p_value | f_ca(n) | f_co(n) | ln(OR) | STDerr |
|-----|------|---------|---------|---------|--------|--------|
|-----|------|---------|---------|---------|--------|--------|

PGC\_SCZ wave3 eur only

|    |      |          |              |              |        |      |
|----|------|----------|--------------|--------------|--------|------|
| 18 | 0.99 | 1.78e-11 | 0.737(53386) | 0.748(77258) | -0.066 | 0.01 |
|----|------|----------|--------------|--------------|--------|------|

PGC\_SCZ wave3 asn only

|   |      |       |              |              |        |       |
|---|------|-------|--------------|--------------|--------|-------|
| 4 | 0.76 | 0.949 | 0.974(14004) | 0.975(16757) | -0.004 | 0.064 |
|---|------|-------|--------------|--------------|--------|-------|

PGC\_SCZ wave2 only

|    |      |         |              |              |        |       |
|----|------|---------|--------------|--------------|--------|-------|
| 16 | 0.99 | 1.2e-06 | 0.752(34850) | 0.756(44347) | -0.061 | 0.013 |
|----|------|---------|--------------|--------------|--------|-------|

PGC\_SCZ wave3 (excl. wave2)

|   |      |          |              |              |       |       |
|---|------|----------|--------------|--------------|-------|-------|
| 6 | 0.90 | 4.92e-06 | 0.822(32540) | 0.817(49668) | -0.07 | 0.015 |
|---|------|----------|--------------|--------------|-------|-------|

PGC\_SCZ wave3 (incl. wave2)

|    |      |          |              |              |        |      |
|----|------|----------|--------------|--------------|--------|------|
| 22 | 0.95 | 2.88e-11 | 0.786(67390) | 0.788(94015) | -0.065 | 0.01 |
|----|------|----------|--------------|--------------|--------|------|

Decode - Replication

|   |      |      |             |               |       |       |
|---|------|------|-------------|---------------|-------|-------|
| 0 | 1.00 | 0.99 | 0.757(1979) | 0.731(142627) | -0.07 | 0.043 |
|---|------|------|-------------|---------------|-------|-------|

PGC\_SCZ wave3 (incl. wave2 and replication)

|    |      |          |              |               |        |      |
|----|------|----------|--------------|---------------|--------|------|
| 22 | 0.98 | 1.09e-10 | 0.785(69369) | 0.753(236642) | -0.062 | 0.01 |
|----|------|----------|--------------|---------------|--------|------|

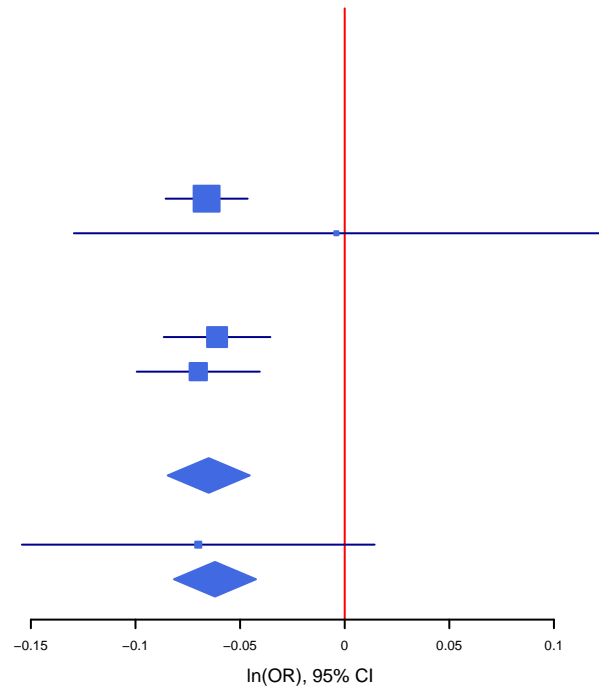



rs17049247

A/G

2:58141065

—

het\_P:

0.78

het\_I:

0.0

|  | ngt | info | p_value | f_ca(n) | f_co(n) | ln(OR) | STDerr |
|--|-----|------|---------|---------|---------|--------|--------|
|--|-----|------|---------|---------|---------|--------|--------|

PGC\_SCZ wave3 eur only

|   |      |          |              |              |        |       |
|---|------|----------|--------------|--------------|--------|-------|
| 6 | 1.00 | 2.45e-09 | 0.903(53386) | 0.911(77258) | -0.089 | 0.015 |
|---|------|----------|--------------|--------------|--------|-------|

PGC\_SCZ wave3 asn only

|   |      |        |             |              |        |       |
|---|------|--------|-------------|--------------|--------|-------|
| 0 | 0.98 | 0.0207 | 0.97(13014) | 0.974(15757) | -0.125 | 0.054 |
|---|------|--------|-------------|--------------|--------|-------|

PGC\_SCZ wave2 only

|   |      |          |              |              |        |       |
|---|------|----------|--------------|--------------|--------|-------|
| 0 | 1.00 | 5.93e-07 | 0.907(34850) | 0.913(44347) | -0.095 | 0.019 |
|---|------|----------|--------------|--------------|--------|-------|

PGC\_SCZ wave3 (excl. wave2)

|   |      |          |              |             |        |       |
|---|------|----------|--------------|-------------|--------|-------|
| 6 | 0.99 | 7.59e-05 | 0.927(31550) | 0.93(48668) | -0.087 | 0.022 |
|---|------|----------|--------------|-------------|--------|-------|

PGC\_SCZ wave3 (incl. wave2)

|   |      |          |              |              |        |       |
|---|------|----------|--------------|--------------|--------|-------|
| 6 | 0.99 | 1.95e-10 | 0.916(66400) | 0.922(93015) | -0.091 | 0.014 |
|---|------|----------|--------------|--------------|--------|-------|

Decode – Replication

|   |      |       |             |               |        |      |
|---|------|-------|-------------|---------------|--------|------|
| 0 | 1.00 | 0.317 | 0.925(1979) | 0.922(142627) | -0.087 | 0.07 |
|---|------|-------|-------------|---------------|--------|------|

PGC\_SCZ wave3 (incl. wave2 and replication)

|   |      |          |              |               |       |       |
|---|------|----------|--------------|---------------|-------|-------|
| 6 | 1.00 | 1.13e-10 | 0.916(68379) | 0.922(235642) | -0.09 | 0.014 |
|---|------|----------|--------------|---------------|-------|-------|

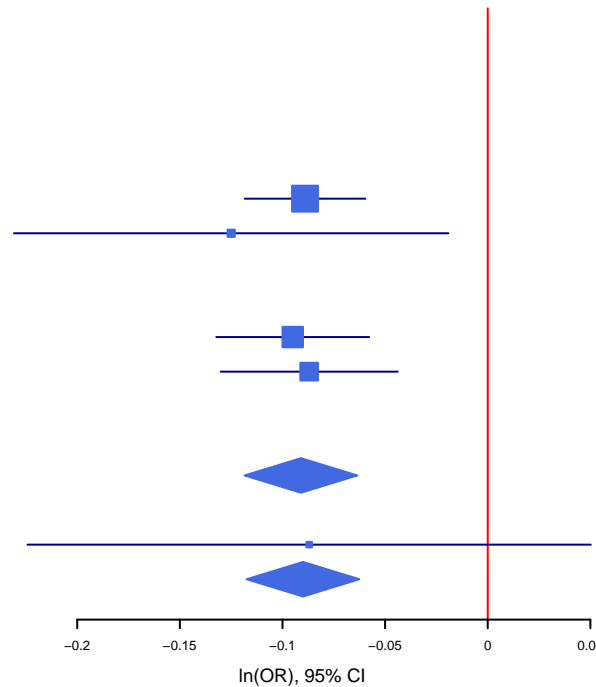

|                                                    |          |             |                 |                     |                      |              |              |
|----------------------------------------------------|----------|-------------|-----------------|---------------------|----------------------|--------------|--------------|
| rs1915019                                          | A/G      |             | 8:89283689      |                     |                      |              |              |
|                                                    | ++       |             | het_P:          |                     | 0.991                | het_I:       | 0.0          |
|                                                    | ngt      | info        | p_value         | f_ca(n)             | f_co(n)              | ln(OR)       | STDerr       |
| PGC_SCZ wave3 eur only                             | 5        | 1.00        | 6.57e-09        | 0.265(53386)        | 0.25(77258)          | 0.057        | 0.01         |
| PGC_SCZ wave3 asn only                             | 0        | 0.99        | 0.0162          | 0.132(14004)        | 0.124(16757)         | 0.061        | 0.026        |
| PGC_SCZ wave2 only                                 | 1        | 1.01        | 3.77e-06        | 0.256(34850)        | 0.247(44347)         | 0.058        | 0.012        |
| PGC_SCZ wave3 (excl. wave2)                        | 4        | 0.99        | 2.17e-05        | 0.218(32540)        | 0.209(49668)         | 0.058        | 0.014        |
| <b>PGC_SCZ wave3 (incl. wave2)</b>                 | <b>5</b> | <b>1.00</b> | <b>3.43e-10</b> | <b>0.238(67390)</b> | <b>0.227(94015)</b>  | <b>0.058</b> | <b>0.009</b> |
| Decode – Replication                               | 0        | 1.00        | 0.125           | 0.267(1979)         | 0.204(142627)        | 0.058        | 0.044        |
| <b>PGC_SCZ wave3 (incl. wave2 and replication)</b> | <b>5</b> | <b>1.00</b> | <b>1.18e-10</b> | <b>0.239(69369)</b> | <b>0.213(236642)</b> | <b>0.058</b> | <b>0.009</b> |

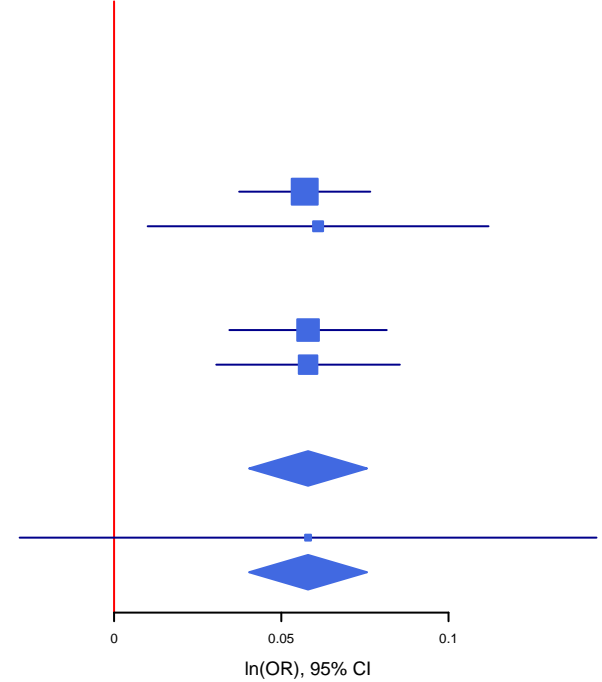

|                                                    |           |             |                 |                     |                      |              |              |
|----------------------------------------------------|-----------|-------------|-----------------|---------------------|----------------------|--------------|--------------|
| rs6538539                                          | G/T       |             | 12:95195293     |                     |                      |              |              |
|                                                    | --        |             | het_P:          |                     | 0.566                | het_I:       | 0.0          |
|                                                    | ngt       | info        | p_value         | f_ca(n)             | f_co(n)              | ln(OR)       | STDerr       |
| PGC_SCZ wave3 eur only                             | 19        | 1.00        | 4.43e-11        | 0.462(53386)        | 0.451(77258)         | 0.057        | 0.009        |
| PGC_SCZ wave3 asn only                             | 7         | 0.99        | 0.482           | 0.548(14004)        | 0.544(16757)         | 0.012        | 0.017        |
| PGC_SCZ wave2 only                                 | 20        | 1.00        | 6.55e-05        | 0.466(34850)        | 0.456(44347)         | 0.043        | 0.011        |
| PGC_SCZ wave3 (excl. wave2)                        | 6         | 1.00        | 1.77e-06        | 0.496(32540)        | 0.478(49668)         | 0.052        | 0.011        |
| <b>PGC_SCZ wave3 (incl. wave2)</b>                 | <b>26</b> | <b>1.00</b> | <b>5.63e-10</b> | <b>0.48(67390)</b>  | <b>0.468(94015)</b>  | <b>0.048</b> | <b>0.008</b> |
| Decode - Replication                               | 0         | 1.00        | 0.0769          | 0.422(1979)         | 0.427(142627)        | 0.052        | 0.038        |
| <b>PGC_SCZ wave3 (incl. wave2 and replication)</b> | <b>26</b> | <b>1.00</b> | <b>1.33e-10</b> | <b>0.478(69369)</b> | <b>0.443(236642)</b> | <b>0.049</b> | <b>0.008</b> |

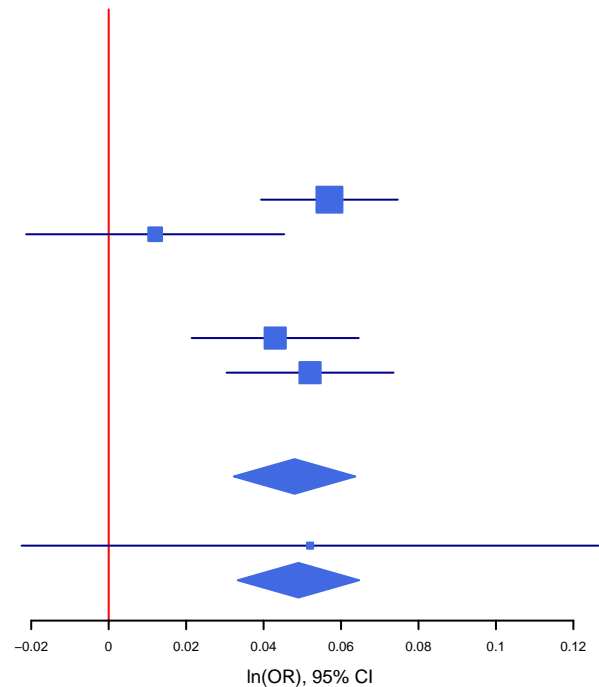

rs3752827

|                                             |     |      |            |              |              |        |        |
|---------------------------------------------|-----|------|------------|--------------|--------------|--------|--------|
|                                             | T/A |      | 17:1265325 |              |              |        |        |
|                                             | —   |      | het_P:     |              | 0.911        | het_I: | 0.0    |
|                                             | ngt | info | p_value    | f_ca(n)      | f_co(n)      | ln(OR) | STDerr |
| PGC_SCZ wave3 eur only                      | 0   | 0.94 | 7.88e-07   | 0.671(53386) | 0.659(77258) | 0.047  | 0.009  |
| PGC_SCZ wave3 asn only                      | 0   | 0.89 | 7.89e-05   | 0.661(14004) | 0.645(16757) | 0.075  | 0.019  |
| PGC_SCZ wave2 only                          | 0   | 0.94 | 1.54e-05   | 0.671(34850) | 0.657(44347) | 0.051  | 0.012  |
| PGC_SCZ wave3 (excl. wave2)                 | 0   | 0.92 | 9.84e-06   | 0.667(32540) | 0.656(49668) | 0.053  | 0.012  |
| PGC_SCZ wave3 (incl. wave2)                 | 0   | 0.93 | 6.33e-10   | 0.669(67390) | 0.657(94015) | 0.052  | 0.008  |
| Decode – Replication                        | 0   | 0.91 | 0.0522     | 0.646(1052)  | 0.646(1399)  | 0.053  | 0.066  |
| PGC_SCZ wave3 (incl. wave2 and replication) | 0   | 0.93 | 1.45e-10   | 0.669(68442) | 0.657(95414) | 0.053  | 0.008  |

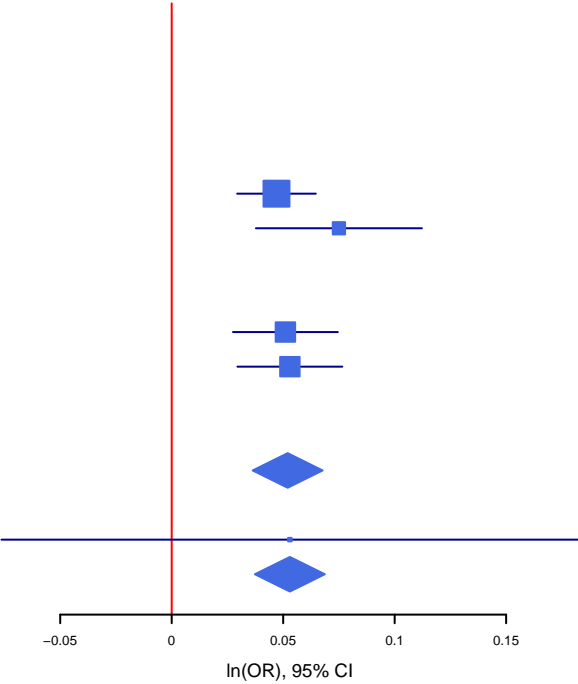

|                                                    |          |             |                 |                     |                      |               |              |
|----------------------------------------------------|----------|-------------|-----------------|---------------------|----------------------|---------------|--------------|
| rs9926049                                          | C/A      |             | 16:9939960      |                     |                      |               |              |
|                                                    | ++       |             | het_P:          | 0.136               | het_I:               | 55.0          |              |
|                                                    | ngt      | info        | p_value         | f_ca(n)             | f_co(n)              | ln(OR)        | STDerr       |
| PGC_SCZ wave3 eur only                             | 0        | 1.00        | 1.22e-09        | 0.692(53386)        | 0.705(77258)         | -0.057        | 0.009        |
| PGC_SCZ wave3 asn only                             | 0        | 0.96        | 0.092           | 0.871(14004)        | 0.877(16757)         | -0.044        | 0.026        |
| PGC_SCZ wave2 only                                 | 0        | 1.00        | 1.47e-08        | 0.702(34850)        | 0.711(44347)         | -0.067        | 0.012        |
| PGC_SCZ wave3 (excl. wave2)                        | 0        | 0.99        | 0.00184         | 0.758(32540)        | 0.759(49668)         | -0.041        | 0.013        |
| <b>PGC_SCZ wave3 (incl. wave2)</b>                 | <b>0</b> | <b>0.99</b> | <b>3.15e-10</b> | <b>0.729(67390)</b> | <b>0.736(94015)</b>  | <b>-0.056</b> | <b>0.009</b> |
| Decode – Replication                               | 0        | 1.00        | 0.295           | 0.726(1979)         | 0.747(142627)        | -0.041        | 0.042        |
| <b>PGC_SCZ wave3 (incl. wave2 and replication)</b> | <b>0</b> | <b>1.00</b> | <b>1.57e-10</b> | <b>0.729(69369)</b> | <b>0.742(236642)</b> | <b>-0.055</b> | <b>0.009</b> |

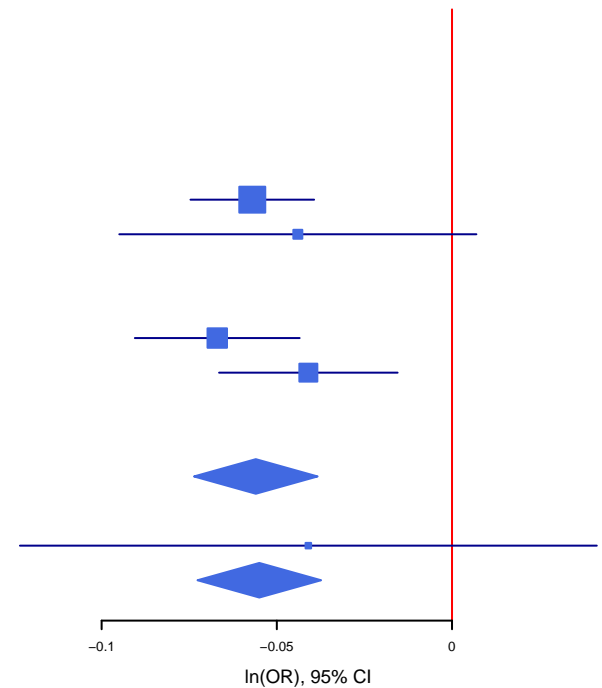

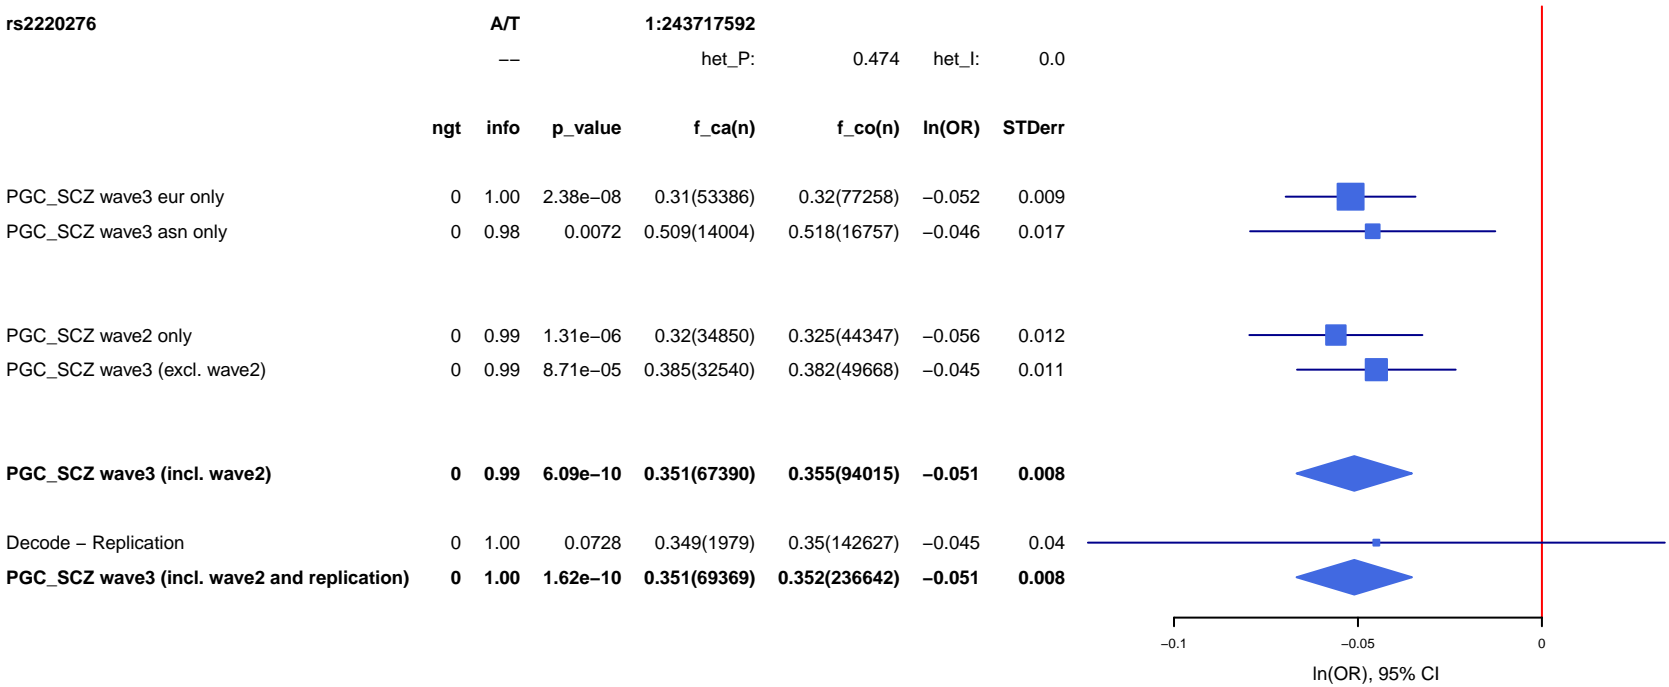

rs11696755

|     |                         |
|-----|-------------------------|
| T/C | 20:48105317             |
| --- | het_P: 0.836 het_I: 0.0 |

|                                             | ngt | info | p_value  | f_ca(n)      | f_co(n)       | ln(OR) | STDerr |
|---------------------------------------------|-----|------|----------|--------------|---------------|--------|--------|
| PGC_SCZ wave3 eur only                      | 0   | 0.99 | 7.26e-09 | 0.805(53386) | 0.816(77258)  | -0.064 | 0.011  |
| PGC_SCZ wave3 asn only                      | 0   | 0.95 | 0.0114   | 0.91(14004)  | 0.914(16757)  | -0.078 | 0.031  |
| PGC_SCZ wave2 only                          | 0   | 0.99 | 1.59e-06 | 0.812(34850) | 0.819(44347)  | -0.067 | 0.014  |
| PGC_SCZ wave3 (excl. wave2)                 | 0   | 0.97 | 4.4e-05  | 0.843(32540) | 0.846(49668)  | -0.063 | 0.015  |
| PGC_SCZ wave3 (incl. wave2)                 | 0   | 0.98 | 2.99e-10 | 0.827(67390) | 0.833(94015)  | -0.065 | 0.01   |
| Decode - Replication                        | 0   | 1.00 | 0.236    | 0.807(1979)  | 0.806(142627) | -0.063 | 0.048  |
| PGC_SCZ wave3 (incl. wave2 and replication) | 0   | 0.99 | 1.69e-10 | 0.826(69369) | 0.817(236642) | -0.065 | 0.01   |

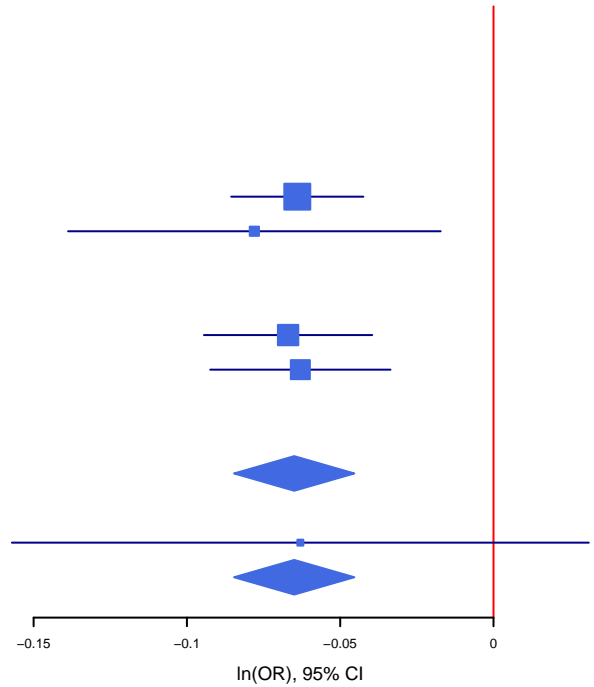

rs13090130

G/A

3:161777035

---

het\_P:

0.825

het\_I:

0.0

| ngt | info | p_value | f_ca(n) | f_co(n) | ln(OR) | STDerr |
|-----|------|---------|---------|---------|--------|--------|
|-----|------|---------|---------|---------|--------|--------|

PGC\_SCZ wave3 eur only

|   |      |         |              |              |       |       |
|---|------|---------|--------------|--------------|-------|-------|
| 0 | 1.00 | 3.9e-06 | 0.641(53386) | 0.633(77258) | 0.041 | 0.009 |
|---|------|---------|--------------|--------------|-------|-------|

PGC\_SCZ wave3 asn only

|   |      |         |              |              |       |       |
|---|------|---------|--------------|--------------|-------|-------|
| 0 | 0.99 | 3.1e-07 | 0.489(14004) | 0.465(16757) | 0.087 | 0.017 |
|---|------|---------|--------------|--------------|-------|-------|

PGC\_SCZ wave2 only

|   |      |          |              |              |      |       |
|---|------|----------|--------------|--------------|------|-------|
| 0 | 0.99 | 1.18e-05 | 0.638(34850) | 0.634(44347) | 0.05 | 0.011 |
|---|------|----------|--------------|--------------|------|-------|

PGC\_SCZ wave3 (excl. wave2)

|   |      |         |              |              |       |       |
|---|------|---------|--------------|--------------|-------|-------|
| 0 | 1.00 | 1.9e-06 | 0.577(32540) | 0.575(49668) | 0.053 | 0.011 |
|---|------|---------|--------------|--------------|-------|-------|

**PGC\_SCZ wave3 (incl. wave2)**

|          |             |                 |                     |                     |              |              |
|----------|-------------|-----------------|---------------------|---------------------|--------------|--------------|
| <b>0</b> | <b>0.99</b> | <b>9.92e-11</b> | <b>0.609(67390)</b> | <b>0.603(94015)</b> | <b>0.051</b> | <b>0.008</b> |
|----------|-------------|-----------------|---------------------|---------------------|--------------|--------------|

Decode - Replication

|   |      |       |             |              |       |      |
|---|------|-------|-------------|--------------|-------|------|
| 0 | 1.00 | 0.978 | 0.653(1979) | 0.66(142627) | 0.053 | 0.04 |
|---|------|-------|-------------|--------------|-------|------|

**PGC\_SCZ wave3 (incl. wave2 and replication)**

|          |             |                |                    |                      |             |              |
|----------|-------------|----------------|--------------------|----------------------|-------------|--------------|
| <b>0</b> | <b>1.00</b> | <b>1.7e-10</b> | <b>0.61(69369)</b> | <b>0.637(236642)</b> | <b>0.05</b> | <b>0.008</b> |
|----------|-------------|----------------|--------------------|----------------------|-------------|--------------|

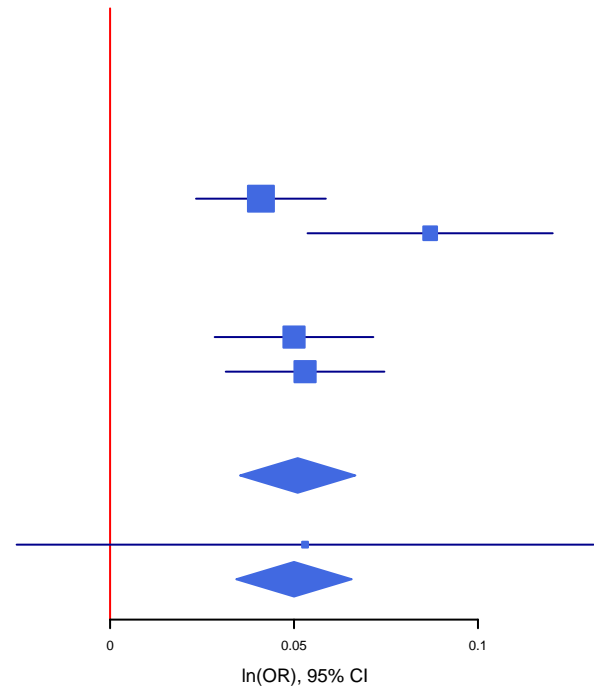



rs10069930

|     |                          |
|-----|--------------------------|
| T/A | 5:140163328              |
| —   | het_P: 0.106 het_I: 61.8 |

|                                             | ngt | info | p_value  | f_ca(n)      | f_co(n)      | ln(OR) | STDerr |
|---------------------------------------------|-----|------|----------|--------------|--------------|--------|--------|
| PGC_SCZ wave3 eur only                      | 0   | 0.95 | 3.08e-07 | 0.506(53386) | 0.499(77258) | 0.045  | 0.009  |
| PGC_SCZ wave3 asn only                      | 0   | 0.92 | 0.000565 | 0.504(14004) | 0.489(16757) | 0.061  | 0.018  |
| PGC_SCZ wave2 only                          | 0   | 0.95 | 4.07e-08 | 0.51(34850)  | 0.5(44347)   | 0.061  | 0.011  |
| PGC_SCZ wave3 (excl. wave2)                 | 0   | 0.94 | 0.00163  | 0.501(32540) | 0.496(49668) | 0.035  | 0.011  |
| PGC_SCZ wave3 (incl. wave2)                 | 0   | 0.94 | 9.43e-10 | 0.506(67390) | 0.498(94015) | 0.048  | 0.008  |
| Decode – Replication                        | 0   | 0.99 | 0.0124   | 0.457(1052)  | 0.457(1399)  | 0.035  | 0.061  |
| PGC_SCZ wave3 (incl. wave2 and replication) | 0   | 0.94 | 1.73e-10 | 0.505(68442) | 0.497(95414) | 0.05   | 0.008  |

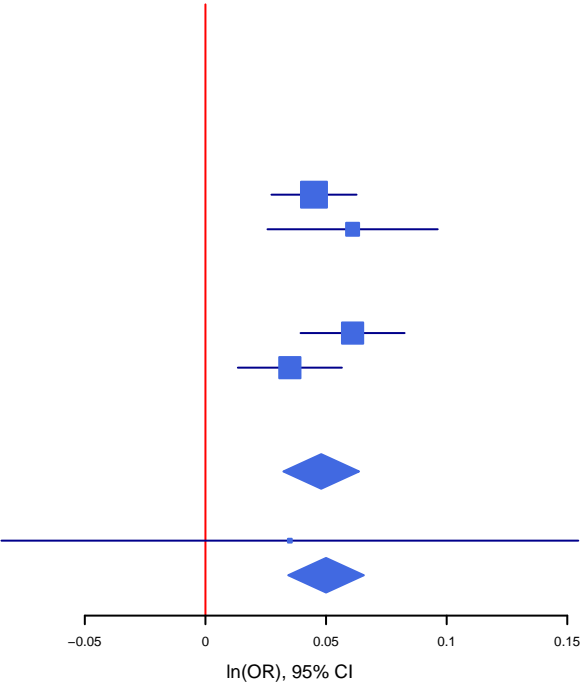

|                                                    |            |             |                 |                     |                      |               |               |     |  |
|----------------------------------------------------|------------|-------------|-----------------|---------------------|----------------------|---------------|---------------|-----|--|
| <b>rs6430492</b>                                   |            |             | <b>G/A</b>      |                     | <b>2:134841002</b>   |               |               |     |  |
|                                                    |            |             | ---             |                     | het_P:               | 0.359         | het_I:        | 0.0 |  |
|                                                    | <b>ngt</b> | <b>info</b> | <b>p_value</b>  | <b>f_ca(n)</b>      | <b>f_co(n)</b>       | <b>ln(OR)</b> | <b>STDerr</b> |     |  |
| PGC_SCZ wave3 eur only                             | 1          | 1.01        | 1.44e-06        | 0.816(53386)        | 0.811(77258)         | 0.053         | 0.011         |     |  |
| PGC_SCZ wave3 asn only                             | 1          | 0.97        | 8.35e-05        | 0.603(14004)        | 0.587(16757)         | 0.069         | 0.018         |     |  |
| PGC_SCZ wave2 only                                 | 1          | 1.01        | 0.000465        | 0.806(34850)        | 0.808(44347)         | 0.048         | 0.014         |     |  |
| PGC_SCZ wave3 (excl. wave2)                        | 1          | 0.99        | 2.4e-07         | 0.736(32540)        | 0.739(49668)         | 0.066         | 0.013         |     |  |
| <b>PGC_SCZ wave3 (incl. wave2)</b>                 | <b>2</b>   | <b>1.00</b> | <b>6.72e-10</b> | <b>0.772(67390)</b> | <b>0.772(94015)</b>  | <b>0.058</b>  | <b>0.009</b>  |     |  |
| Decode – Replication                               | 0          | 1.00        | 0.0627          | 0.797(1979)         | 0.812(142627)        | 0.066         | 0.048         |     |  |
| <b>PGC_SCZ wave3 (incl. wave2 and replication)</b> | <b>2</b>   | <b>1.00</b> | <b>1.76e-10</b> | <b>0.773(69369)</b> | <b>0.796(236642)</b> | <b>0.059</b>  | <b>0.009</b>  |     |  |

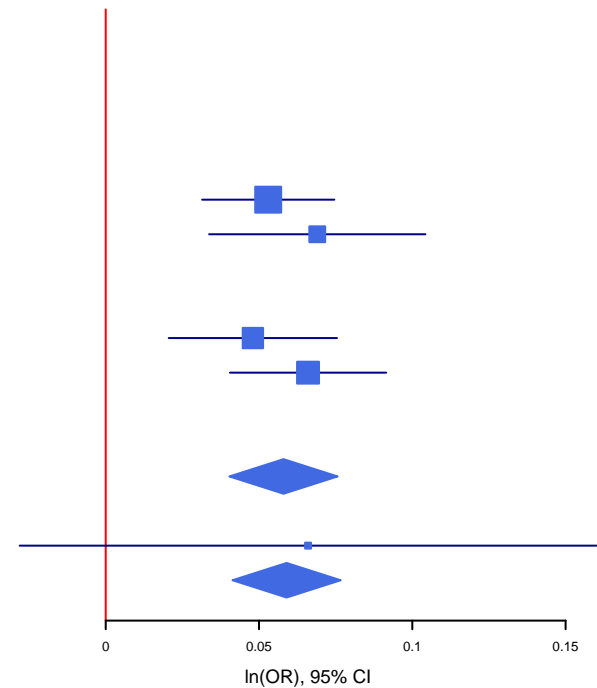

| rs1856507                                          | C/A      |             | 6:73157926     |                     |                      |             |              |
|----------------------------------------------------|----------|-------------|----------------|---------------------|----------------------|-------------|--------------|
|                                                    | --       |             | het_P:         |                     | 0.552                | het_I:      | 0.0          |
|                                                    | ngt      | info        | p_value        | f_ca(n)             | f_co(n)              | ln(OR)      | STDerr       |
| PGC_SCZ wave3 eur only                             | 0        | 0.98        | 1.56e-10       | 0.635(53386)        | 0.615(77258)         | 0.058       | 0.009        |
| PGC_SCZ wave3 asn only                             | 0        | 0.97        | 0.187          | 0.599(14004)        | 0.59(16757)          | 0.023       | 0.018        |
| PGC_SCZ wave2 only                                 | 0        | 0.99        | 9.5e-07        | 0.625(34850)        | 0.607(44347)         | 0.055       | 0.011        |
| PGC_SCZ wave3 (excl. wave2)                        | 0        | 0.97        | 6.35e-05       | 0.629(32540)        | 0.614(49668)         | 0.046       | 0.011        |
| <b>PGC_SCZ wave3 (incl. wave2)</b>                 | <b>0</b> | <b>0.98</b> | <b>3e-10</b>   | <b>0.627(67390)</b> | <b>0.611(94015)</b>  | <b>0.05</b> | <b>0.008</b> |
| Decode – Replication                               | 0        | 1.00        | 0.324          | 0.618(1979)         | 0.572(142627)        | 0.046       | 0.039        |
| <b>PGC_SCZ wave3 (incl. wave2 and replication)</b> | <b>0</b> | <b>0.99</b> | <b>1.9e-10</b> | <b>0.627(69369)</b> | <b>0.588(236642)</b> | <b>0.05</b> | <b>0.008</b> |

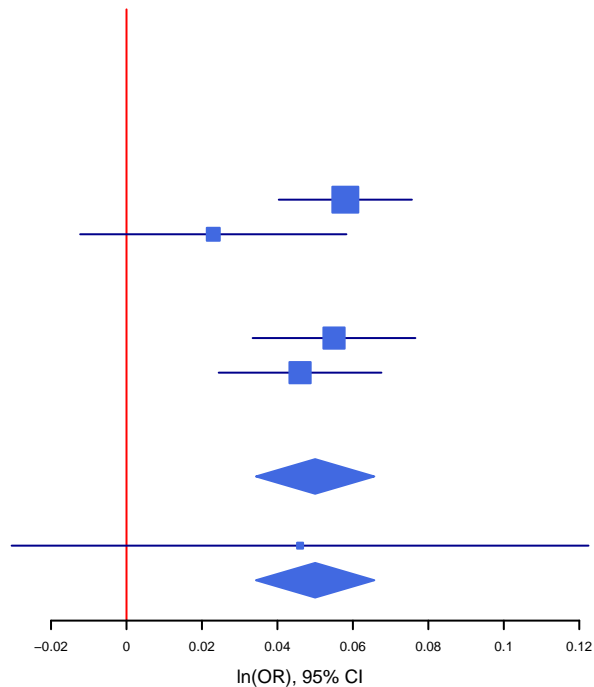

rs28490262

G/C

3:80814042

—

het\_P:

0.562

het\_I:

0.0

|  | ngt | info | p_value | f_ca(n) | f_co(n) | ln(OR) | STDerr |
|--|-----|------|---------|---------|---------|--------|--------|
|--|-----|------|---------|---------|---------|--------|--------|

PGC\_SCZ wave3 eur only

|   |      |          |              |              |       |       |
|---|------|----------|--------------|--------------|-------|-------|
| 0 | 1.00 | 1.65e-07 | 0.685(53386) | 0.678(77258) | 0.048 | 0.009 |
|---|------|----------|--------------|--------------|-------|-------|

PGC\_SCZ wave3 asn only

|   |      |          |              |              |       |       |
|---|------|----------|--------------|--------------|-------|-------|
| 0 | 0.99 | 0.000329 | 0.857(14004) | 0.851(16757) | 0.086 | 0.024 |
|---|------|----------|--------------|--------------|-------|-------|

PGC\_SCZ wave2 only

|   |      |         |              |              |       |       |
|---|------|---------|--------------|--------------|-------|-------|
| 0 | 1.00 | 3.3e-05 | 0.692(34850) | 0.679(44347) | 0.049 | 0.012 |
|---|------|---------|--------------|--------------|-------|-------|

PGC\_SCZ wave3 (excl. wave2)

|   |      |          |              |              |       |       |
|---|------|----------|--------------|--------------|-------|-------|
| 0 | 1.00 | 4.12e-06 | 0.751(32540) | 0.735(49668) | 0.059 | 0.013 |
|---|------|----------|--------------|--------------|-------|-------|

**PGC\_SCZ wave3 (incl. wave2)**

|          |             |                 |                     |                     |              |              |
|----------|-------------|-----------------|---------------------|---------------------|--------------|--------------|
| <b>0</b> | <b>1.00</b> | <b>6.68e-10</b> | <b>0.721(67390)</b> | <b>0.708(94015)</b> | <b>0.053</b> | <b>0.009</b> |
|----------|-------------|-----------------|---------------------|---------------------|--------------|--------------|

Decode – Replication

|   |      |       |             |               |       |      |
|---|------|-------|-------------|---------------|-------|------|
| 0 | 1.00 | 0.131 | 0.664(1979) | 0.688(142627) | 0.059 | 0.04 |
|---|------|-------|-------------|---------------|-------|------|

**PGC\_SCZ wave3 (incl. wave2 and replication)**

|          |             |                 |                     |                      |              |              |
|----------|-------------|-----------------|---------------------|----------------------|--------------|--------------|
| <b>0</b> | <b>1.00</b> | <b>1.95e-10</b> | <b>0.719(69369)</b> | <b>0.696(236642)</b> | <b>0.054</b> | <b>0.008</b> |
|----------|-------------|-----------------|---------------------|----------------------|--------------|--------------|

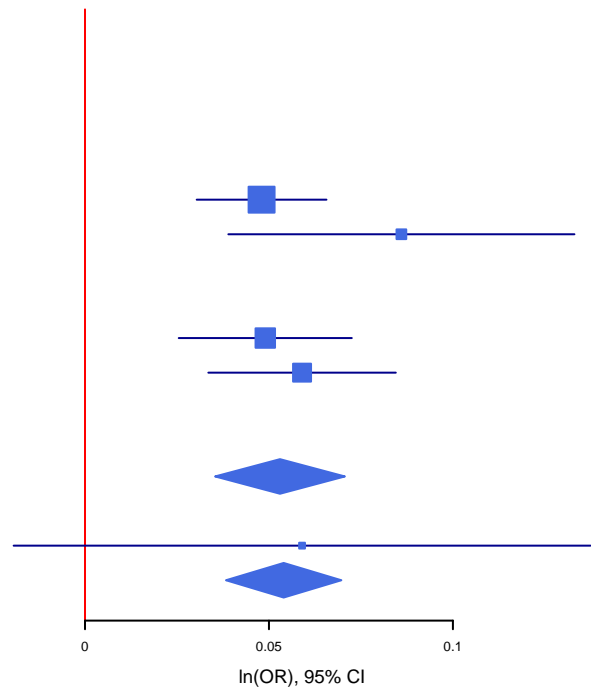

rs12363019

T/A

11:24374545

++

het\_P:

0.095

het\_I:

64.1

| ngt | info | p_value | f_ca(n) | f_co(n) | ln(OR) | STDerr |
|-----|------|---------|---------|---------|--------|--------|
|-----|------|---------|---------|---------|--------|--------|

PGC\_SCZ wave3 eur only

|   |      |          |              |              |        |       |
|---|------|----------|--------------|--------------|--------|-------|
| 0 | 0.99 | 4.95e-09 | 0.481(53386) | 0.492(77258) | -0.051 | 0.009 |
|---|------|----------|--------------|--------------|--------|-------|

PGC\_SCZ wave3 asn only

|   |      |        |              |             |       |       |
|---|------|--------|--------------|-------------|-------|-------|
| 0 | 0.97 | 0.0152 | 0.853(14004) | 0.86(16757) | -0.06 | 0.025 |
|---|------|--------|--------------|-------------|-------|-------|

PGC\_SCZ wave2 only

|   |      |         |              |              |        |       |
|---|------|---------|--------------|--------------|--------|-------|
| 0 | 0.99 | 6.1e-09 | 0.498(34850) | 0.499(44347) | -0.064 | 0.011 |
|---|------|---------|--------------|--------------|--------|-------|

PGC\_SCZ wave3 (excl. wave2)

|   |      |         |              |             |        |       |
|---|------|---------|--------------|-------------|--------|-------|
| 0 | 0.98 | 0.00278 | 0.623(32540) | 0.61(49668) | -0.036 | 0.012 |
|---|------|---------|--------------|-------------|--------|-------|

**PGC\_SCZ wave3 (incl. wave2)**

|          |             |                 |                     |                     |               |              |
|----------|-------------|-----------------|---------------------|---------------------|---------------|--------------|
| <b>0</b> | <b>0.99</b> | <b>2.58e-10</b> | <b>0.558(67390)</b> | <b>0.558(94015)</b> | <b>-0.052</b> | <b>0.008</b> |
|----------|-------------|-----------------|---------------------|---------------------|---------------|--------------|

Decode - Replication

|   |      |       |             |               |        |       |
|---|------|-------|-------------|---------------|--------|-------|
| 0 | 1.00 | 0.315 | 0.511(1979) | 0.501(142627) | -0.036 | 0.038 |
|---|------|-------|-------------|---------------|--------|-------|

**PGC\_SCZ wave3 (incl. wave2 and replication)**

|          |             |                 |                     |                      |               |              |
|----------|-------------|-----------------|---------------------|----------------------|---------------|--------------|
| <b>0</b> | <b>0.99</b> | <b>1.98e-10</b> | <b>0.557(69369)</b> | <b>0.523(236642)</b> | <b>-0.051</b> | <b>0.008</b> |
|----------|-------------|-----------------|---------------------|----------------------|---------------|--------------|

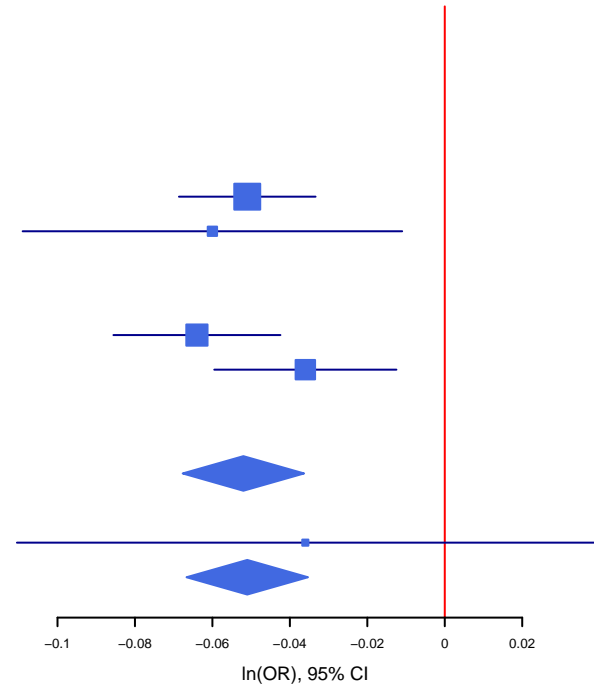

|                                                    |          |             |                 |                     |                      |               |              |
|----------------------------------------------------|----------|-------------|-----------------|---------------------|----------------------|---------------|--------------|
| rs2387414                                          | G/C      |             | 19:51034243     |                     |                      |               |              |
|                                                    | ++       |             | het_P:          |                     | 0.3                  | het_I:        | 7.1          |
|                                                    | ngt      | info        | p_value         | f_ca(n)             | f_co(n)              | ln(OR)        | STDerr       |
| PGC_SCZ wave3 eur only                             | 0        | 0.94        | 7.08e-07        | 0.364(53386)        | 0.375(77258)         | -0.045        | 0.009        |
| PGC_SCZ wave3 asn only                             | 0        | 0.88        | 7.45e-05        | 0.718(14004)        | 0.735(16757)         | -0.081        | 0.02         |
| PGC_SCZ wave2 only                                 | 0        | 0.95        | 0.000173        | 0.386(34850)        | 0.385(44347)         | -0.043        | 0.012        |
| PGC_SCZ wave3 (excl. wave2)                        | 0        | 0.91        | 6.56e-07        | 0.493(32540)        | 0.488(49668)         | -0.061        | 0.012        |
| <b>PGC_SCZ wave3 (incl. wave2)</b>                 | <b>0</b> | <b>0.93</b> | <b>8.01e-10</b> | <b>0.438(67390)</b> | <b>0.44(94015)</b>   | <b>-0.052</b> | <b>0.008</b> |
| Decode – Replication                               | 0        | 1.00        | 0.0814          | 0.352(1979)         | 0.368(142627)        | -0.061        | 0.04         |
| <b>PGC_SCZ wave3 (incl. wave2 and replication)</b> | <b>0</b> | <b>0.97</b> | <b>2.05e-10</b> | <b>0.436(69369)</b> | <b>0.397(236642)</b> | <b>-0.052</b> | <b>0.008</b> |

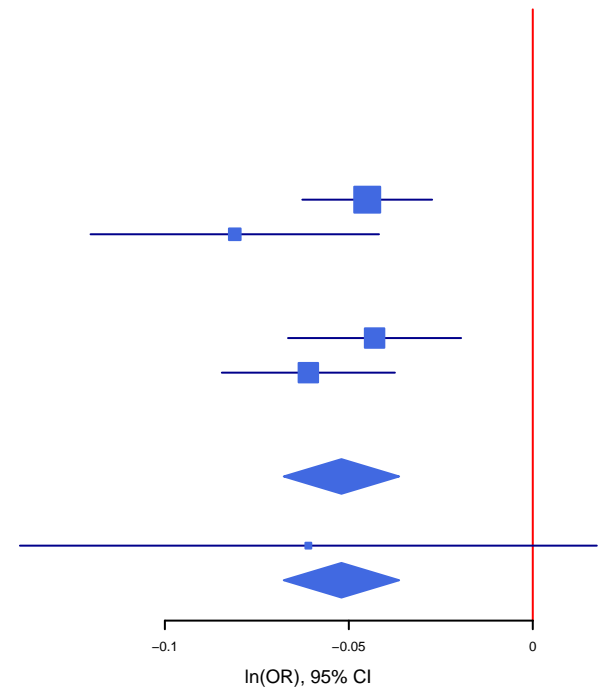

|                                                    |            |             |                 |                    |                      |               |               |      |  |
|----------------------------------------------------|------------|-------------|-----------------|--------------------|----------------------|---------------|---------------|------|--|
| <b>rs6984242</b>                                   |            |             | <b>G/A</b>      |                    | <b>8:60700469</b>    |               |               |      |  |
|                                                    |            |             | --              |                    | het_P:               | 0.187         | het_I:        | 42.5 |  |
|                                                    | <b>ngt</b> | <b>info</b> | <b>p_value</b>  | <b>f_ca(n)</b>     | <b>f_co(n)</b>       | <b>ln(OR)</b> | <b>STDerr</b> |      |  |
| PGC_SCZ wave3 eur only                             | 7          | 1.00        | 3.86e-10        | 0.413(53386)       | 0.4(77258)           | 0.055         | 0.009         |      |  |
| PGC_SCZ wave3 asn only                             | 0          | 0.99        | 0.0101          | 0.399(14004)       | 0.39(16757)          | 0.045         | 0.017         |      |  |
| PGC_SCZ wave2 only                                 | 0          | 1.01        | 1.1e-08         | 0.411(34850)       | 0.399(44347)         | 0.063         | 0.011         |      |  |
| PGC_SCZ wave3 (excl. wave2)                        | 7          | 1.00        | 0.000133        | 0.409(32540)       | 0.398(49668)         | 0.042         | 0.011         |      |  |
| <b>PGC_SCZ wave3 (incl. wave2)</b>                 | <b>7</b>   | <b>1.00</b> | <b>1.5e-11</b>  | <b>0.41(67390)</b> | <b>0.398(94015)</b>  | <b>0.053</b>  | <b>0.008</b>  |      |  |
| Decode – Replication                               | 0          | 1.00        | 0.187           | 0.414(1979)        | 0.422(142627)        | 0.042         | 0.038         |      |  |
| <b>PGC_SCZ wave3 (incl. wave2 and replication)</b> | <b>7</b>   | <b>1.00</b> | <b>2.07e-10</b> | <b>0.41(69369)</b> | <b>0.412(236642)</b> | <b>0.049</b>  | <b>0.008</b>  |      |  |

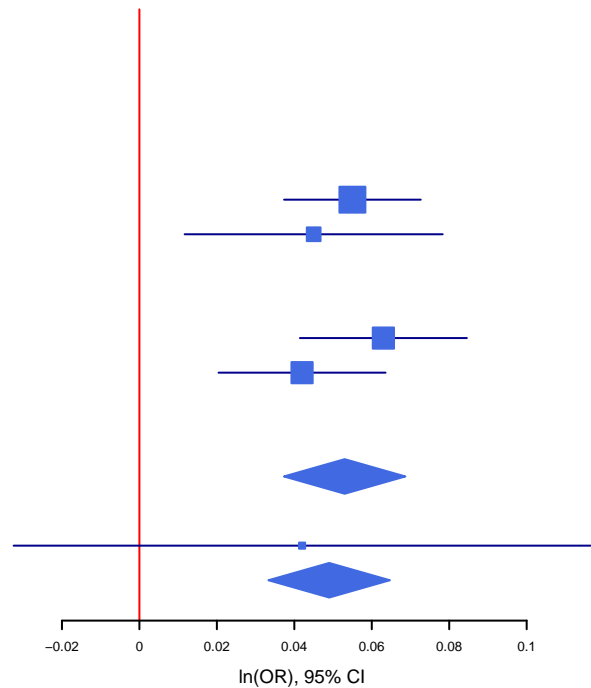

| rs2022265                                          | A/G       |             | 6:84293271      |                     |                      |              |              |
|----------------------------------------------------|-----------|-------------|-----------------|---------------------|----------------------|--------------|--------------|
|                                                    | ++        |             | het_P:          | 0.102               | het_I:               | 62.5         |              |
|                                                    | ngt       | info        | p_value         | f_ca(n)             | f_co(n)              | ln(OR)       | STDerr       |
| PGC_SCZ wave3 eur only                             | 49        | 1.00        | 2.93e-08        | 0.56(53386)         | 0.544(77258)         | 0.048        | 0.009        |
| PGC_SCZ wave3 asn only                             | 8         | 1.00        | 0.00355         | 0.435(14004)        | 0.424(16757)         | 0.05         | 0.017        |
| PGC_SCZ wave2 only                                 | 13        | 1.00        | 2.32e-08        | 0.551(34850)        | 0.537(44347)         | 0.061        | 0.011        |
| PGC_SCZ wave3 (excl. wave2)                        | 44        | 1.00        | 0.00107         | 0.516(32540)        | 0.51(49668)          | 0.036        | 0.011        |
| <b>PGC_SCZ wave3 (incl. wave2)</b>                 | <b>57</b> | <b>1.00</b> | <b>3.74e-10</b> | <b>0.534(67390)</b> | <b>0.523(94015)</b>  | <b>0.049</b> | <b>0.008</b> |
| Decode – Replication                               | 0         | 1.00        | 0.423           | 0.549(1979)         | 0.487(142627)        | 0.036        | 0.039        |
| <b>PGC_SCZ wave3 (incl. wave2 and replication)</b> | <b>57</b> | <b>1.00</b> | <b>2.36e-10</b> | <b>0.534(69369)</b> | <b>0.501(236642)</b> | <b>0.048</b> | <b>0.008</b> |

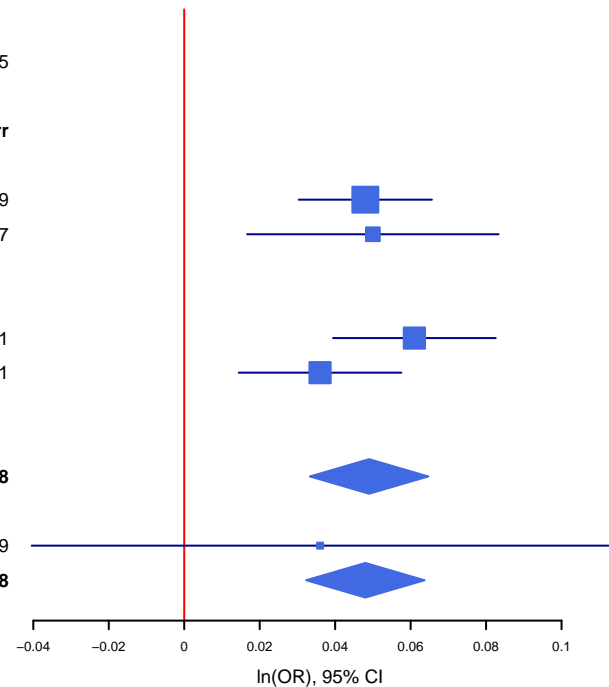



| rs11917680                                         | G/T      |             | 3:50471408      |                     |                      |              |              |
|----------------------------------------------------|----------|-------------|-----------------|---------------------|----------------------|--------------|--------------|
|                                                    | —        |             | het_P:          | 0.061               | het_I:               | 71.6         |              |
|                                                    | ngt      | info        | p_value         | f_ca(n)             | f_co(n)              | ln(OR)       | STDerr       |
| PGC_SCZ wave3 eur only                             | 1        | 0.96        | 3.65e-06        | 0.746(53386)        | 0.737(77258)         | 0.047        | 0.01         |
| PGC_SCZ wave3 asn only                             | 1        | 0.91        | 1.43e-06        | 0.773(14004)        | 0.762(16757)         | 0.102        | 0.021        |
| PGC_SCZ wave2 only                                 | 1        | 0.97        | 0.00122         | 0.743(34850)        | 0.735(44347)         | 0.04         | 0.012        |
| PGC_SCZ wave3 (excl. wave2)                        | 1        | 0.93        | 1.47e-08        | 0.76(32540)         | 0.747(49668)         | 0.075        | 0.013        |
| <b>PGC_SCZ wave3 (incl. wave2)</b>                 | <b>2</b> | <b>0.95</b> | <b>4.17e-10</b> | <b>0.751(67390)</b> | <b>0.741(94015)</b>  | <b>0.057</b> | <b>0.009</b> |
| Decode – Replication                               | 0        | 1.00        | 0.266           | 0.738(1979)         | 0.765(142627)        | 0.075        | 0.044        |
| <b>PGC_SCZ wave3 (incl. wave2 and replication)</b> | <b>2</b> | <b>0.98</b> | <b>2.49e-10</b> | <b>0.751(69369)</b> | <b>0.755(236642)</b> | <b>0.056</b> | <b>0.009</b> |

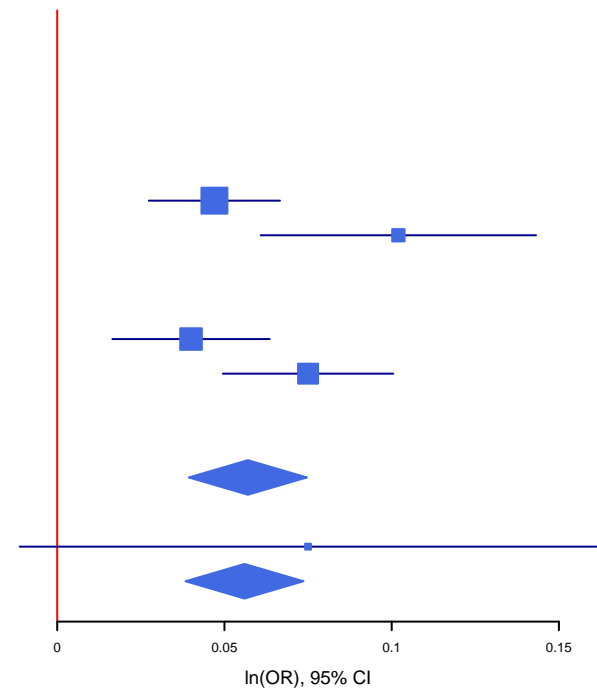

rs72986630

|     |                          |
|-----|--------------------------|
| C/T | 19:11849736              |
| ++  | het_P: 0.144 het_I: 53.1 |

|                                             | ngt | info | p_value  | f_ca(n)      | f_co(n)       | ln(OR) | STDerr |
|---------------------------------------------|-----|------|----------|--------------|---------------|--------|--------|
| PGC_SCZ wave3 eur only                      | 30  | 0.87 | 3.59e-10 | 0.926(53386) | 0.932(77258)  | -0.112 | 0.018  |
| PGC_SCZ wave3 asn only                      | 0   | 0.32 | 0.544    | 0.983(10156) | 0.982(12922)  | -0.08  | 0.132  |
| PGC_SCZ wave2 only                          | 1   | 0.82 | 1.03e-08 | 0.928(34850) | 0.933(44347)  | -0.134 | 0.023  |
| PGC_SCZ wave3 (excl. wave2)                 | 29  | 0.77 | 0.00272  | 0.943(28692) | 0.945(45833)  | -0.082 | 0.027  |
| PGC_SCZ wave3 (incl. wave2)                 | 30  | 0.79 | 3.07e-10 | 0.935(63542) | 0.939(90180)  | -0.112 | 0.018  |
| Decode - Replication                        | 0   | 0.99 | 0.5      | 0.939(1979)  | 0.962(142627) | -0.082 | 0.088  |
| PGC_SCZ wave3 (incl. wave2 and replication) | 30  | 0.92 | 2.62e-10 | 0.935(65521) | 0.953(232807) | -0.11  | 0.017  |

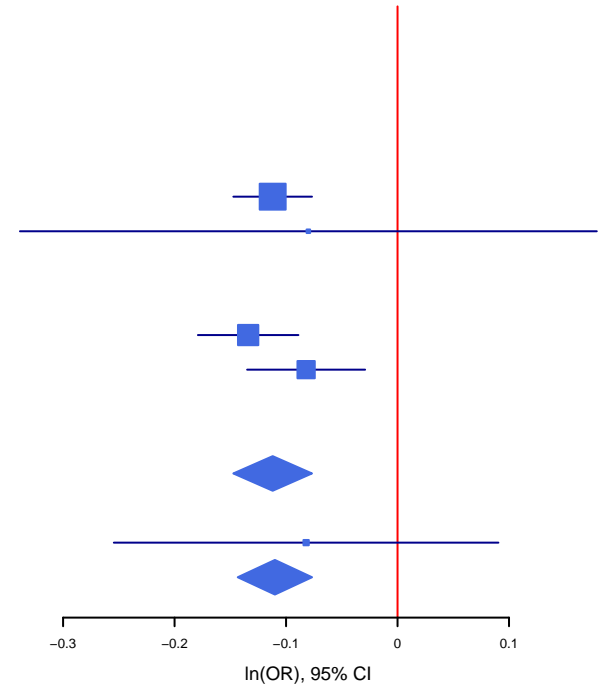

| rs6588168                                          | C/T      |             | 1:66324118      |                     |                      |               |              |
|----------------------------------------------------|----------|-------------|-----------------|---------------------|----------------------|---------------|--------------|
|                                                    | ++       |             | het_P:          | 0.112               | het_I:               | 60.5          |              |
|                                                    | ngt      | info        | p_value         | f_ca(n)             | f_co(n)              | ln(OR)        | STDerr       |
| PGC_SCZ wave3 eur only                             | 0        | 0.99        | 4.71e-08        | 0.427(53386)        | 0.435(77258)         | -0.048        | 0.009        |
| PGC_SCZ wave3 asn only                             | 0        | 0.95        | 0.00336         | 0.656(14004)        | 0.669(16757)         | -0.054        | 0.018        |
| PGC_SCZ wave2 only                                 | 0        | 0.99        | 2.9e-08         | 0.438(34850)        | 0.442(44347)         | -0.061        | 0.011        |
| PGC_SCZ wave3 (excl. wave2)                        | 0        | 0.97        | 0.00148         | 0.514(32540)        | 0.508(49668)         | -0.036        | 0.011        |
| <b>PGC_SCZ wave3 (incl. wave2)</b>                 | <b>0</b> | <b>0.98</b> | <b>5.94e-10</b> | <b>0.475(67390)</b> | <b>0.477(94015)</b>  | <b>-0.049</b> | <b>0.008</b> |
| Decode – Replication                               | 0        | 1.00        | 0.214           | 0.427(1979)         | 0.4(142627)          | -0.036        | 0.039        |
| <b>PGC_SCZ wave3 (incl. wave2 and replication)</b> | <b>0</b> | <b>0.99</b> | <b>2.74e-10</b> | <b>0.474(69369)</b> | <b>0.431(236642)</b> | <b>-0.049</b> | <b>0.008</b> |

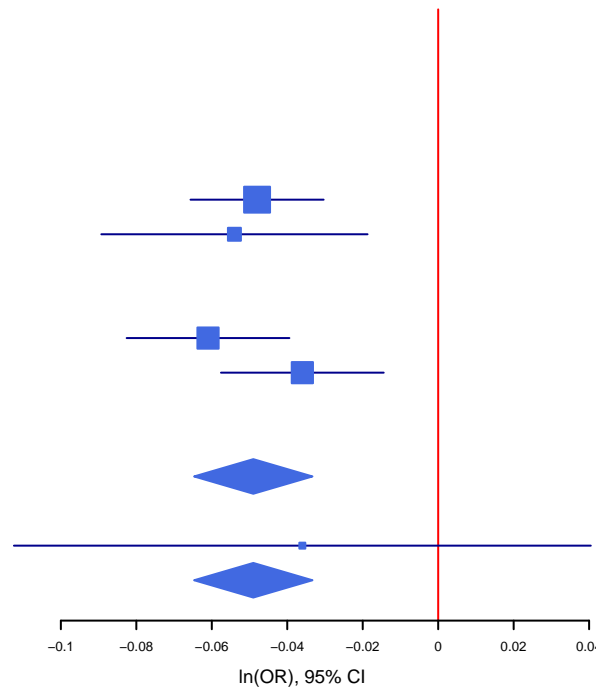

rs10957321

G/A

8:65605878

++

het\_P:

0.067

het\_I:

70.1

|  | ngt | info | p_value | f_ca(n) | f_co(n) | ln(OR) | STDerr |
|--|-----|------|---------|---------|---------|--------|--------|
|--|-----|------|---------|---------|---------|--------|--------|

PGC\_SCZ wave3 eur only

|   |      |          |              |              |        |       |
|---|------|----------|--------------|--------------|--------|-------|
| 9 | 0.99 | 3.48e-08 | 0.478(53386) | 0.489(77258) | -0.048 | 0.009 |
|---|------|----------|--------------|--------------|--------|-------|

PGC\_SCZ wave3 asn only

|   |      |         |              |              |       |       |
|---|------|---------|--------------|--------------|-------|-------|
| 1 | 0.99 | 0.00331 | 0.539(14004) | 0.553(16757) | -0.05 | 0.017 |
|---|------|---------|--------------|--------------|-------|-------|

PGC\_SCZ wave2 only

|   |      |         |              |              |        |       |
|---|------|---------|--------------|--------------|--------|-------|
| 7 | 0.99 | 0.00171 | 0.478(34850) | 0.482(44347) | -0.034 | 0.011 |
|---|------|---------|--------------|--------------|--------|-------|

PGC\_SCZ wave3 (excl. wave2)

|   |      |          |              |              |        |       |
|---|------|----------|--------------|--------------|--------|-------|
| 3 | 0.99 | 1.18e-08 | 0.505(32540) | 0.516(49668) | -0.062 | 0.011 |
|---|------|----------|--------------|--------------|--------|-------|

**PGC\_SCZ wave3 (incl. wave2)**

|           |             |                 |                     |                   |               |              |
|-----------|-------------|-----------------|---------------------|-------------------|---------------|--------------|
| <b>10</b> | <b>0.99</b> | <b>4.18e-10</b> | <b>0.491(67390)</b> | <b>0.5(94015)</b> | <b>-0.048</b> | <b>0.008</b> |
|-----------|-------------|-----------------|---------------------|-------------------|---------------|--------------|

Decode - Replication

|   |      |       |             |               |        |       |
|---|------|-------|-------------|---------------|--------|-------|
| 0 | 1.00 | 0.392 | 0.481(1979) | 0.495(142627) | -0.062 | 0.038 |
|---|------|-------|-------------|---------------|--------|-------|

**PGC\_SCZ wave3 (incl. wave2 and replication)**

|           |             |                 |                     |                      |               |              |
|-----------|-------------|-----------------|---------------------|----------------------|---------------|--------------|
| <b>10</b> | <b>1.00</b> | <b>2.86e-10</b> | <b>0.491(69369)</b> | <b>0.497(236642)</b> | <b>-0.048</b> | <b>0.008</b> |
|-----------|-------------|-----------------|---------------------|----------------------|---------------|--------------|

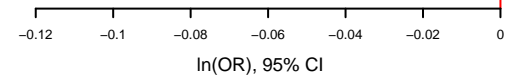

| rs1121296                                          | T/C      |             | 1:72174197      |                     |                      |              |              |
|----------------------------------------------------|----------|-------------|-----------------|---------------------|----------------------|--------------|--------------|
|                                                    | ++       |             | het_P:          | 0.667               | het_I:               | 0.0          |              |
|                                                    | ngt      | info        | p_value         | f_ca(n)             | f_co(n)              | ln(OR)       | STDerr       |
| PGC_SCZ wave3 eur only                             | 5        | 0.99        | 3.69e-07        | 0.632(53386)        | 0.624(77258)         | 0.045        | 0.009        |
| PGC_SCZ wave3 asn only                             | 0        | 0.91        | 0.00253         | 0.421(14004)        | 0.406(16757)         | 0.055        | 0.018        |
| PGC_SCZ wave2 only                                 | 0        | 0.99        | 6.44e-06        | 0.62(34850)         | 0.617(44347)         | 0.051        | 0.011        |
| PGC_SCZ wave3 (excl. wave2)                        | 5        | 0.96        | 0.000134        | 0.555(32540)        | 0.556(49668)         | 0.044        | 0.012        |
| <b>PGC_SCZ wave3 (incl. wave2)</b>                 | <b>5</b> | <b>0.97</b> | <b>3.74e-09</b> | <b>0.588(67390)</b> | <b>0.585(94015)</b>  | <b>0.047</b> | <b>0.008</b> |
| Decode – Replication                               | 0        | 1.00        | 0.0103          | 0.633(1979)         | 0.64(142627)         | 0.044        | 0.04         |
| <b>PGC_SCZ wave3 (incl. wave2 and replication)</b> | <b>5</b> | <b>0.99</b> | <b>2.92e-10</b> | <b>0.589(69369)</b> | <b>0.618(236642)</b> | <b>0.049</b> | <b>0.008</b> |

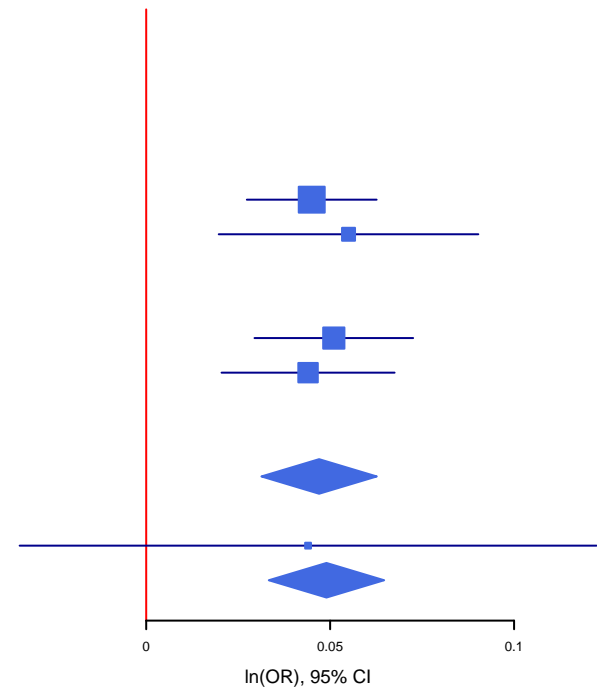

rs498591

A/T

9:14509105

—

het\_P:

0.445

het\_I:

0.0

|  | ngt | info | p_value | f_ca(n) | f_co(n) | ln(OR) | STDerr |
|--|-----|------|---------|---------|---------|--------|--------|
|--|-----|------|---------|---------|---------|--------|--------|

PGC\_SCZ wave3 eur only

|    |      |          |              |              |        |       |
|----|------|----------|--------------|--------------|--------|-------|
| 20 | 0.99 | 2.11e-09 | 0.847(53386) | 0.854(77258) | -0.072 | 0.012 |
|----|------|----------|--------------|--------------|--------|-------|

PGC\_SCZ wave3 asn only

|   |      |       |              |              |        |       |
|---|------|-------|--------------|--------------|--------|-------|
| 8 | 0.95 | 0.117 | 0.889(14004) | 0.892(16757) | -0.044 | 0.028 |
|---|------|-------|--------------|--------------|--------|-------|

PGC\_SCZ wave2 only

|    |      |          |              |              |       |       |
|----|------|----------|--------------|--------------|-------|-------|
| 21 | 0.99 | 8.92e-05 | 0.849(34850) | 0.853(44347) | -0.06 | 0.015 |
|----|------|----------|--------------|--------------|-------|-------|

PGC\_SCZ wave3 (excl. wave2)

|   |      |          |              |              |        |       |
|---|------|----------|--------------|--------------|--------|-------|
| 7 | 0.97 | 1.95e-06 | 0.862(32540) | 0.867(49668) | -0.077 | 0.016 |
|---|------|----------|--------------|--------------|--------|-------|

**PGC\_SCZ wave3 (incl. wave2)**

|           |             |                 |                     |                     |               |              |
|-----------|-------------|-----------------|---------------------|---------------------|---------------|--------------|
| <b>28</b> | <b>0.98</b> | <b>9.59e-10</b> | <b>0.856(67390)</b> | <b>0.861(94015)</b> | <b>-0.068</b> | <b>0.011</b> |
|-----------|-------------|-----------------|---------------------|---------------------|---------------|--------------|

Decode – Replication

|   |      |       |             |               |        |       |
|---|------|-------|-------------|---------------|--------|-------|
| 0 | 1.00 | 0.147 | 0.858(1979) | 0.862(142627) | -0.077 | 0.053 |
|---|------|-------|-------------|---------------|--------|-------|

**PGC\_SCZ wave3 (incl. wave2 and replication)**

|           |             |                 |                     |                      |               |              |
|-----------|-------------|-----------------|---------------------|----------------------|---------------|--------------|
| <b>28</b> | <b>0.99</b> | <b>3.28e-10</b> | <b>0.856(69369)</b> | <b>0.862(236642)</b> | <b>-0.068</b> | <b>0.011</b> |
|-----------|-------------|-----------------|---------------------|----------------------|---------------|--------------|

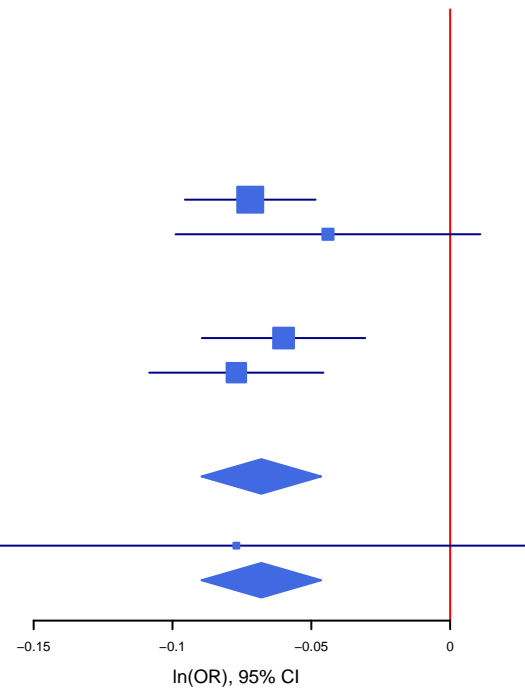

| rs72974269                                         | C/T      |             | 2:225454907     |                     |                      |              |              |
|----------------------------------------------------|----------|-------------|-----------------|---------------------|----------------------|--------------|--------------|
|                                                    | ---      |             | het_P:          |                     | 0.274                | het_I:       | 16.5         |
|                                                    | ngt      | info        | p_value         | f_ca(n)             | f_co(n)              | ln(OR)       | STDerr       |
| PGC_SCZ wave3 eur only                             | 0        | 0.99        | 9.24e-09        | 0.68(53386)         | 0.67(77258)          | 0.053        | 0.009        |
| PGC_SCZ wave3 asn only                             | 0        | 0.99        | 0.00875         | 0.713(14004)        | 0.698(16757)         | 0.049        | 0.019        |
| PGC_SCZ wave2 only                                 | 0        | 1.00        | 1.38e-07        | 0.683(34850)        | 0.669(44347)         | 0.061        | 0.012        |
| PGC_SCZ wave3 (excl. wave2)                        | 0        | 0.99        | 0.000267        | 0.691(32540)        | 0.68(49668)          | 0.043        | 0.012        |
| <b>PGC_SCZ wave3 (incl. wave2)</b>                 | <b>0</b> | <b>0.99</b> | <b>2.76e-10</b> | <b>0.687(67390)</b> | <b>0.675(94015)</b>  | <b>0.052</b> | <b>0.008</b> |
| Decode – Replication                               | 0        | 1.00        | 0.556           | 0.668(1979)         | 0.701(142627)        | 0.043        | 0.041        |
| <b>PGC_SCZ wave3 (incl. wave2 and replication)</b> | <b>0</b> | <b>1.00</b> | <b>3.65e-10</b> | <b>0.686(69369)</b> | <b>0.691(236642)</b> | <b>0.051</b> | <b>0.008</b> |

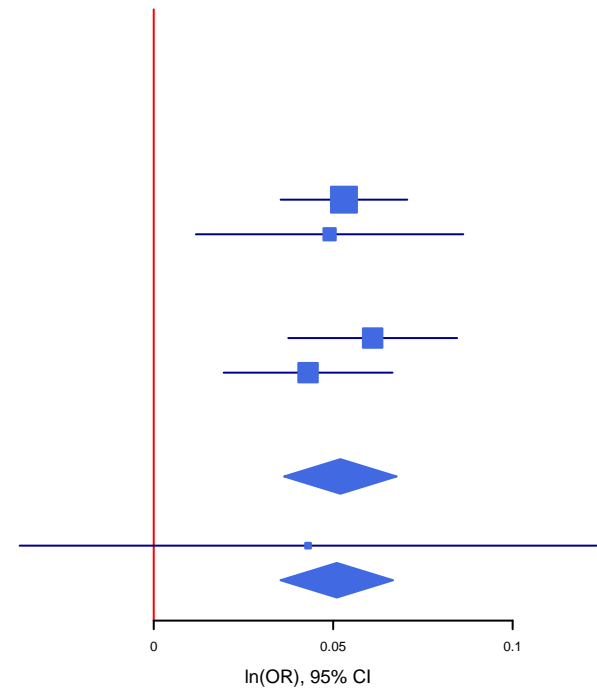

| rs12432904                                         | G/T      |             | 14:103812320    |                     |                      |              |              |
|----------------------------------------------------|----------|-------------|-----------------|---------------------|----------------------|--------------|--------------|
|                                                    | --       |             | het_P:          |                     | 0.942                | het_I:       | 0.0          |
|                                                    | ngt      | info        | p_value         | f_ca(n)             | f_co(n)              | ln(OR)       | STDerr       |
| PGC_SCZ wave3 eur only                             | 0        | 0.97        | 5.46e-09        | 0.665(53386)        | 0.652(77258)         | 0.054        | 0.009        |
| PGC_SCZ wave3 asn only                             | 0        | 0.90        | 0.14            | 0.621(14004)        | 0.614(16757)         | 0.027        | 0.018        |
| PGC_SCZ wave2 only                                 | 0        | 0.97        | 2.61e-05        | 0.665(34850)        | 0.654(44347)         | 0.049        | 0.012        |
| PGC_SCZ wave3 (excl. wave2)                        | 0        | 0.95        | 4.06e-05        | 0.646(32540)        | 0.637(49668)         | 0.048        | 0.012        |
| <b>PGC_SCZ wave3 (incl. wave2)</b>                 | <b>0</b> | <b>0.96</b> | <b>4.22e-09</b> | <b>0.656(67390)</b> | <b>0.645(94015)</b>  | <b>0.048</b> | <b>0.008</b> |
| Decode – Replication                               | 0        | 1.00        | 0.0168          | 0.604(1979)         | 0.595(142627)        | 0.048        | 0.04         |
| <b>PGC_SCZ wave3 (incl. wave2 and replication)</b> | <b>0</b> | <b>0.98</b> | <b>4.02e-10</b> | <b>0.655(69369)</b> | <b>0.615(236642)</b> | <b>0.05</b>  | <b>0.008</b> |

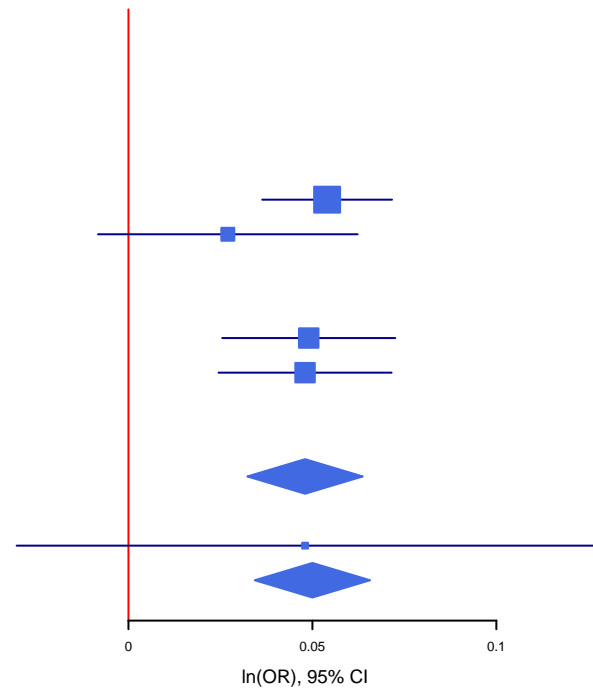



| <b>rs10767734</b>                                  |           | <b>C/T</b>  |                 | <b>11:28642381</b>  |                      |              |              |
|----------------------------------------------------|-----------|-------------|-----------------|---------------------|----------------------|--------------|--------------|
|                                                    |           | --          |                 | het_P:              | 0.35                 | het_I:       | 0.0          |
|                                                    | ngt       | info        | p_value         | f_ca(n)             | f_co(n)              | ln(OR)       | STDerr       |
| PGC_SCZ wave3 eur only                             | 15        | 0.98        | 7.55e-08        | 0.641(53386)        | 0.632(77258)         | 0.049        | 0.009        |
| PGC_SCZ wave3 asn only                             | 2         | 0.93        | 0.00161         | 0.286(14004)        | 0.267(16757)         | 0.062        | 0.02         |
| PGC_SCZ wave2 only                                 | 13        | 0.99        | 0.000129        | 0.623(34850)        | 0.626(44347)         | 0.044        | 0.011        |
| PGC_SCZ wave3 (excl. wave2)                        | 4         | 0.97        | 6.81e-07        | 0.507(32540)        | 0.514(49668)         | 0.059        | 0.012        |
| <b>PGC_SCZ wave3 (incl. wave2)</b>                 | <b>17</b> | <b>0.98</b> | <b>5.62e-10</b> | <b>0.567(67390)</b> | <b>0.567(94015)</b>  | <b>0.051</b> | <b>0.008</b> |
| Decode – Replication                               | 0         | 1.00        | 0.389           | 0.606(1979)         | 0.625(142627)        | 0.059        | 0.039        |
| <b>PGC_SCZ wave3 (incl. wave2 and replication)</b> | <b>17</b> | <b>0.99</b> | <b>4.05e-10</b> | <b>0.568(69369)</b> | <b>0.602(236642)</b> | <b>0.05</b>  | <b>0.008</b> |

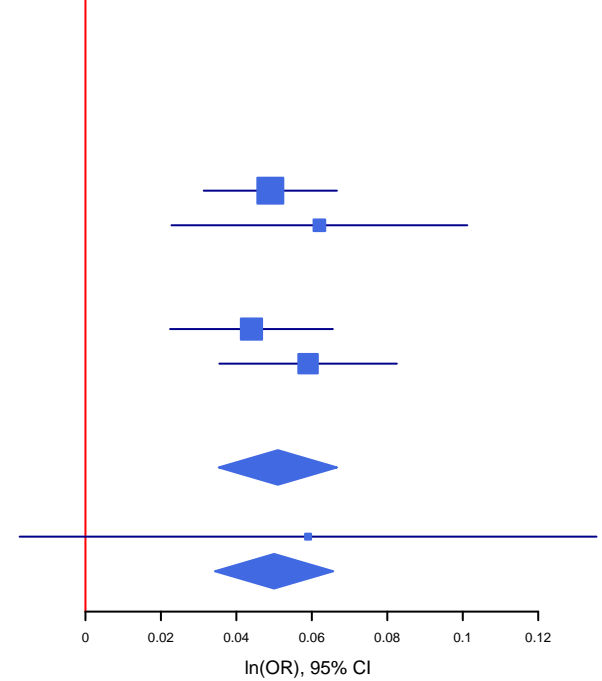

| rs2153960                                          | G/A       |             | 6:108988184     |                     |                      |              |              |
|----------------------------------------------------|-----------|-------------|-----------------|---------------------|----------------------|--------------|--------------|
|                                                    | --        |             | het_P:          | 0.527               | het_I:               | 0.0          |              |
|                                                    | ngt       | info        | p_value         | f_ca(n)             | f_co(n)              | ln(OR)       | STDerr       |
| PGC_SCZ wave3 eur only                             | 61        | 1.00        | 1.22e-06        | 0.312(53386)        | 0.3(77258)           | 0.045        | 0.009        |
| PGC_SCZ wave3 asn only                             | 10        | 0.98        | 5.82e-05        | 0.281(14004)        | 0.269(16757)         | 0.077        | 0.019        |
| PGC_SCZ wave2 only                                 | 29        | 1.00        | 1.67e-06        | 0.306(34850)        | 0.296(44347)         | 0.057        | 0.012        |
| PGC_SCZ wave3 (excl. wave2)                        | 42        | 0.99        | 0.000111        | 0.304(32540)        | 0.293(49668)         | 0.046        | 0.012        |
| <b>PGC_SCZ wave3 (incl. wave2)</b>                 | <b>71</b> | <b>1.00</b> | <b>9.22e-10</b> | <b>0.305(67390)</b> | <b>0.294(94015)</b>  | <b>0.051</b> | <b>0.008</b> |
| Decode – Replication                               | 0         | 1.00        | 0.202           | 0.308(1979)         | 0.265(142627)        | 0.046        | 0.042        |
| <b>PGC_SCZ wave3 (incl. wave2 and replication)</b> | <b>71</b> | <b>1.00</b> | <b>4.11e-10</b> | <b>0.305(69369)</b> | <b>0.276(236642)</b> | <b>0.052</b> | <b>0.008</b> |

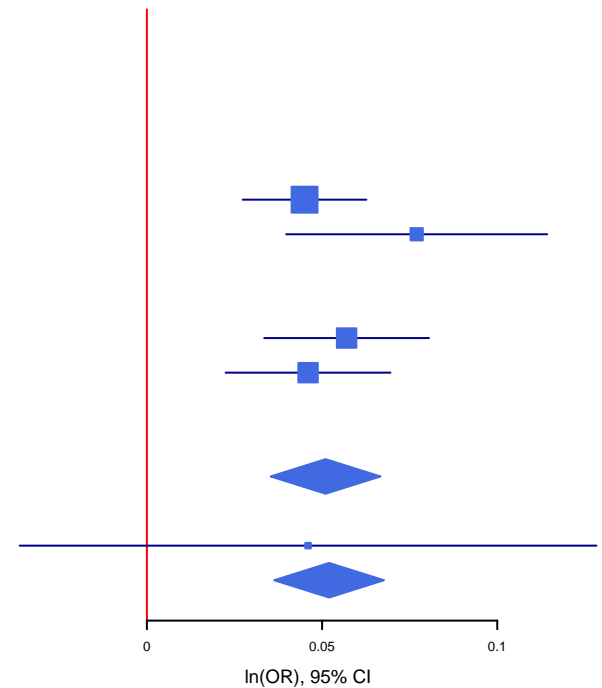

| rs1463209                                          | C/T       |             | 12:39518293     |                     |                      |              |              |
|----------------------------------------------------|-----------|-------------|-----------------|---------------------|----------------------|--------------|--------------|
|                                                    | --        |             | het_P:          |                     | 0.882                | het_I:       | 0.0          |
|                                                    | ngt       | info        | p_value         | f_ca(n)             | f_co(n)              | ln(OR)       | STDerr       |
| PGC_SCZ wave3 eur only                             | 18        | 1.00        | 2.78e-07        | 0.442(53386)        | 0.424(77258)         | 0.045        | 0.009        |
| PGC_SCZ wave3 asn only                             | 3         | 1.00        | 0.00216         | 0.809(14004)        | 0.8(16757)           | 0.066        | 0.022        |
| PGC_SCZ wave2 only                                 | 13        | 1.00        | 2.45e-05        | 0.455(34850)        | 0.428(44347)         | 0.047        | 0.011        |
| PGC_SCZ wave3 (excl. wave2)                        | 8         | 1.00        | 3.39e-05        | 0.586(32540)        | 0.547(49668)         | 0.049        | 0.012        |
| <b>PGC_SCZ wave3 (incl. wave2)</b>                 | <b>21</b> | <b>1.00</b> | <b>3.34e-09</b> | <b>0.518(67390)</b> | <b>0.491(94015)</b>  | <b>0.048</b> | <b>0.008</b> |
| Decode – Replication                               | 0         | 1.00        | 0.0275          | 0.44(1979)          | 0.395(142627)        | 0.049        | 0.038        |
| <b>PGC_SCZ wave3 (incl. wave2 and replication)</b> | <b>21</b> | <b>1.00</b> | <b>4.99e-10</b> | <b>0.516(69369)</b> | <b>0.433(236642)</b> | <b>0.049</b> | <b>0.008</b> |

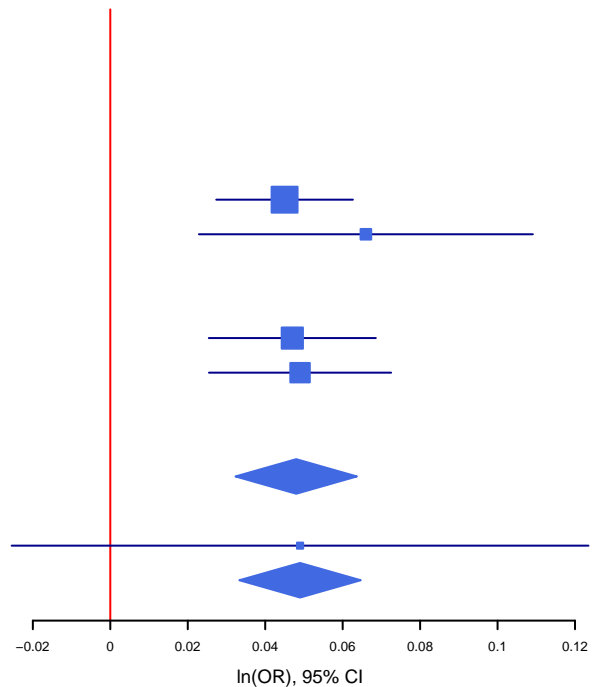

rs11121172

C/A

1:8418644

—

het\_P:

0.696

het\_I:

0.0

|  | ngt | info | p_value | f_ca(n) | f_co(n) | ln(OR) | STDerr |
|--|-----|------|---------|---------|---------|--------|--------|
|--|-----|------|---------|---------|---------|--------|--------|

PGC\_SCZ wave3 eur only

|   |      |          |              |              |       |       |
|---|------|----------|--------------|--------------|-------|-------|
| 1 | 0.97 | 1.31e-08 | 0.333(53386) | 0.326(77258) | 0.053 | 0.009 |
|---|------|----------|--------------|--------------|-------|-------|

PGC\_SCZ wave3 asn only

|   |      |        |              |              |       |      |
|---|------|--------|--------------|--------------|-------|------|
| 1 | 0.85 | 0.0135 | 0.122(14004) | 0.113(16757) | 0.074 | 0.03 |
|---|------|--------|--------------|--------------|-------|------|

PGC\_SCZ wave2 only

|   |      |          |              |              |       |       |
|---|------|----------|--------------|--------------|-------|-------|
| 1 | 0.98 | 1.18e-05 | 0.325(34850) | 0.322(44347) | 0.052 | 0.012 |
|---|------|----------|--------------|--------------|-------|-------|

PGC\_SCZ wave3 (excl. wave2)

|   |      |          |              |              |       |       |
|---|------|----------|--------------|--------------|-------|-------|
| 1 | 0.93 | 1.35e-05 | 0.252(32540) | 0.258(49668) | 0.059 | 0.014 |
|---|------|----------|--------------|--------------|-------|-------|

**PGC\_SCZ wave3 (incl. wave2)**

|          |             |                 |                     |                     |              |              |
|----------|-------------|-----------------|---------------------|---------------------|--------------|--------------|
| <b>2</b> | <b>0.95</b> | <b>7.15e-10</b> | <b>0.289(67390)</b> | <b>0.288(94015)</b> | <b>0.055</b> | <b>0.009</b> |
|----------|-------------|-----------------|---------------------|---------------------|--------------|--------------|

Decode – Replication

|   |      |       |             |               |       |      |
|---|------|-------|-------------|---------------|-------|------|
| 0 | 0.99 | 0.293 | 0.315(1979) | 0.359(142627) | 0.059 | 0.04 |
|---|------|-------|-------------|---------------|-------|------|

**PGC\_SCZ wave3 (incl. wave2 and replication)**

|          |             |                 |                    |                      |              |              |
|----------|-------------|-----------------|--------------------|----------------------|--------------|--------------|
| <b>2</b> | <b>0.97</b> | <b>5.06e-10</b> | <b>0.29(69369)</b> | <b>0.331(236642)</b> | <b>0.054</b> | <b>0.009</b> |
|----------|-------------|-----------------|--------------------|----------------------|--------------|--------------|

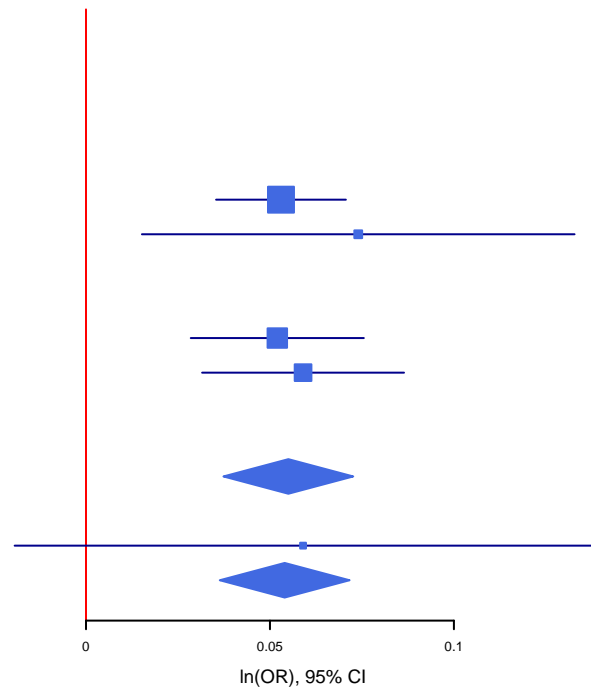

|                                                    |          |             |                 |                     |                     |              |              |     |  |
|----------------------------------------------------|----------|-------------|-----------------|---------------------|---------------------|--------------|--------------|-----|--|
| rs2649999                                          |          |             |                 | T/C                 | 12:121380544        |              |              |     |  |
|                                                    |          |             |                 | ++                  | het_P:              | 0.309        | het_I:       | 3.2 |  |
|                                                    | ngt      | info        | p_value         | f_ca(n)             | f_co(n)             | ln(OR)       | STDerr       |     |  |
| PGC_SCZ wave3 eur only                             | 0        | 0.96        | 4.48e-06        | 0.357(53386)        | 0.349(77258)        | 0.042        | 0.009        |     |  |
| PGC_SCZ wave3 asn only                             | 0        | 0.92        | 1.41e-05        | 0.494(14004)        | 0.475(16757)        | 0.077        | 0.018        |     |  |
| PGC_SCZ wave2 only                                 | 0        | 0.97        | 0.000316        | 0.37(34850)         | 0.36(44347)         | 0.041        | 0.012        |     |  |
| PGC_SCZ wave3 (excl. wave2)                        | 0        | 0.94        | 6.04e-07        | 0.403(32540)        | 0.382(49668)        | 0.058        | 0.012        |     |  |
| <b>PGC_SCZ wave3 (incl. wave2)</b>                 | <b>0</b> | <b>0.95</b> | <b>1.28e-09</b> | <b>0.386(67390)</b> | <b>0.372(94015)</b> | <b>0.05</b>  | <b>0.008</b> |     |  |
| Decode – Replication                               | 0        | 0.95        | 0.0807          | 0.375(1052)         | 0.375(1399)         | 0.058        | 0.063        |     |  |
| <b>PGC_SCZ wave3 (incl. wave2 and replication)</b> | <b>0</b> | <b>0.95</b> | <b>5.23e-10</b> | <b>0.386(68442)</b> | <b>0.372(95414)</b> | <b>0.051</b> | <b>0.008</b> |     |  |

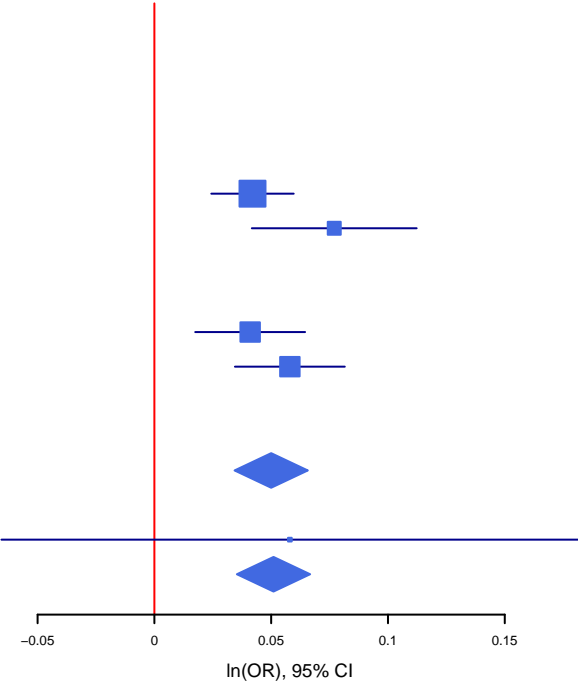

|                                                    |            |             |                 |                     |                      |               |               |     |  |
|----------------------------------------------------|------------|-------------|-----------------|---------------------|----------------------|---------------|---------------|-----|--|
| <b>rs7816998</b>                                   |            |             | <b>G/A</b>      |                     | <b>8:38257506</b>    |               |               |     |  |
|                                                    |            |             | —               |                     | het_P:               | 0.535         | het_I:        | 0.0 |  |
|                                                    | <b>ngt</b> | <b>info</b> | <b>p_value</b>  | <b>f_ca(n)</b>      | <b>f_co(n)</b>       | <b>ln(OR)</b> | <b>STDerr</b> |     |  |
| PGC_SCZ wave3 eur only                             | 2          | 0.99        | 4.46e-08        | 0.793(53386)        | 0.781(77258)         | 0.058         | 0.011         |     |  |
| PGC_SCZ wave3 asn only                             | 1          | 0.98        | 0.00187         | 0.705(14004)        | 0.69(16757)          | 0.058         | 0.019         |     |  |
| PGC_SCZ wave2 only                                 | 2          | 1.00        | 1.53e-06        | 0.79(34850)         | 0.783(44347)         | 0.064         | 0.013         |     |  |
| PGC_SCZ wave3 (excl. wave2)                        | 1          | 0.99        | 3.96e-05        | 0.758(32540)        | 0.749(49668)         | 0.052         | 0.013         |     |  |
| <b>PGC_SCZ wave3 (incl. wave2)</b>                 | <b>3</b>   | <b>0.99</b> | <b>3.11e-10</b> | <b>0.775(67390)</b> | <b>0.765(94015)</b>  | <b>0.058</b>  | <b>0.009</b>  |     |  |
| Decode – Replication                               | 0          | 1.00        | 0.901           | 0.779(1979)         | 0.743(142627)        | 0.052         | 0.046         |     |  |
| <b>PGC_SCZ wave3 (incl. wave2 and replication)</b> | <b>3</b>   | <b>1.00</b> | <b>6.23e-10</b> | <b>0.775(69369)</b> | <b>0.752(236642)</b> | <b>0.056</b>  | <b>0.009</b>  |     |  |

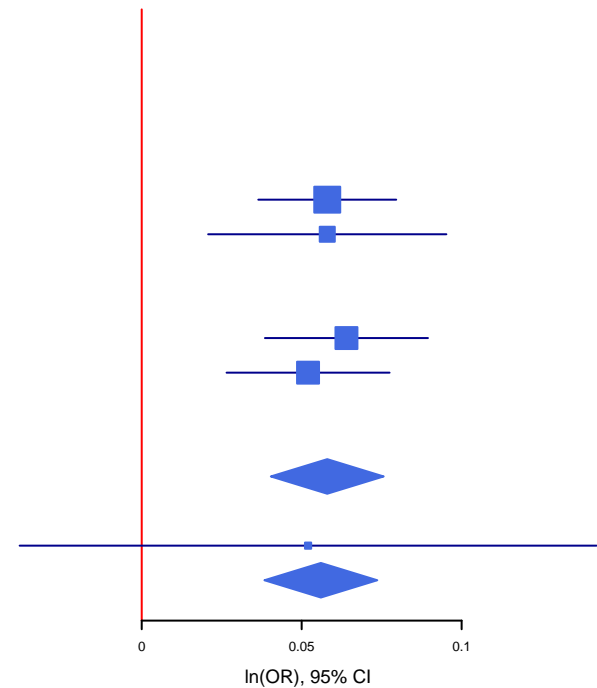

| rs73292401                                         | T/A      |             | 17:12875908     |                     |                      |               |             |
|----------------------------------------------------|----------|-------------|-----------------|---------------------|----------------------|---------------|-------------|
|                                                    | ++       |             | het_P:          | 0.523               | het_I:               | 0.0           |             |
|                                                    | ngt      | info        | p_value         | f_ca(n)             | f_co(n)              | ln(OR)        | STDerr      |
| PGC_SCZ wave3 eur only                             | 0        | 0.98        | 5.48e-10        | 0.799(53386)        | 0.808(77258)         | -0.068        | 0.011       |
| PGC_SCZ wave3 asn only                             | 0        | 0.89        | 0.122           | 0.915(14004)        | 0.922(16757)         | -0.051        | 0.033       |
| PGC_SCZ wave2 only                                 | 0        | 0.99        | 1.45e-05        | 0.807(34850)        | 0.812(44347)         | -0.06         | 0.014       |
| PGC_SCZ wave3 (excl. wave2)                        | 0        | 0.95        | 2.39e-06        | 0.84(32540)         | 0.843(49668)         | -0.073        | 0.016       |
| <b>PGC_SCZ wave3 (incl. wave2)</b>                 | <b>0</b> | <b>0.97</b> | <b>1.82e-10</b> | <b>0.823(67390)</b> | <b>0.828(94015)</b>  | <b>-0.066</b> | <b>0.01</b> |
| Decode – Replication                               | 0        | 1.00        | 0.681           | 0.816(1979)         | 0.822(142627)        | -0.073        | 0.05        |
| <b>PGC_SCZ wave3 (incl. wave2 and replication)</b> | <b>0</b> | <b>0.99</b> | <b>6.34e-10</b> | <b>0.823(69369)</b> | <b>0.824(236642)</b> | <b>-0.062</b> | <b>0.01</b> |

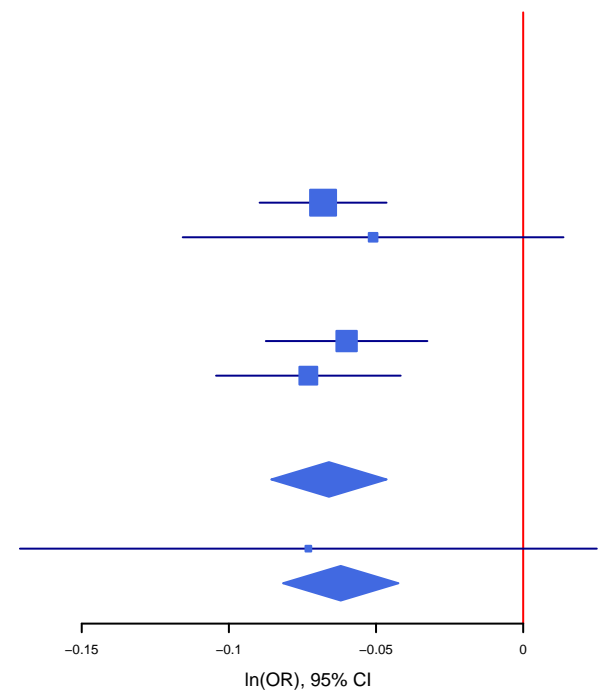

| rs8175378                                          | T/C      |             | 5:49478710      |                     |                      |              |              |
|----------------------------------------------------|----------|-------------|-----------------|---------------------|----------------------|--------------|--------------|
|                                                    | ++       |             | het_P:          | 0.958               | het_I:               | 0.0          |              |
|                                                    | ngt      | info        | p_value         | f_ca(n)             | f_co(n)              | ln(OR)       | STDerr       |
| PGC_SCZ wave3 eur only                             | 0        | 0.80        | 1.7e-07         | 0.451(53386)        | 0.44(77258)          | 0.051        | 0.01         |
| PGC_SCZ wave3 asn only                             | 0        | 0.79        | 0.000955        | 0.505(14004)        | 0.49(16757)          | 0.061        | 0.018        |
| PGC_SCZ wave2 only                                 | 0        | 0.70        | 5.15e-05        | 0.452(34850)        | 0.438(44347)         | 0.052        | 0.013        |
| PGC_SCZ wave3 (excl. wave2)                        | 0        | 0.89        | 3.32e-06        | 0.473(32540)        | 0.458(49668)         | 0.053        | 0.011        |
| <b>PGC_SCZ wave3 (incl. wave2)</b>                 | <b>0</b> | <b>0.80</b> | <b>7.03e-10</b> | <b>0.462(67390)</b> | <b>0.449(94015)</b>  | <b>0.053</b> | <b>0.009</b> |
| Decode – Replication                               | 0        | 1.00        | 0.396           | 0.425(1979)         | 0.414(142627)        | 0.053        | 0.038        |
| <b>PGC_SCZ wave3 (incl. wave2 and replication)</b> | <b>0</b> | <b>0.92</b> | <b>6.62e-10</b> | <b>0.461(69369)</b> | <b>0.428(236642)</b> | <b>0.052</b> | <b>0.008</b> |

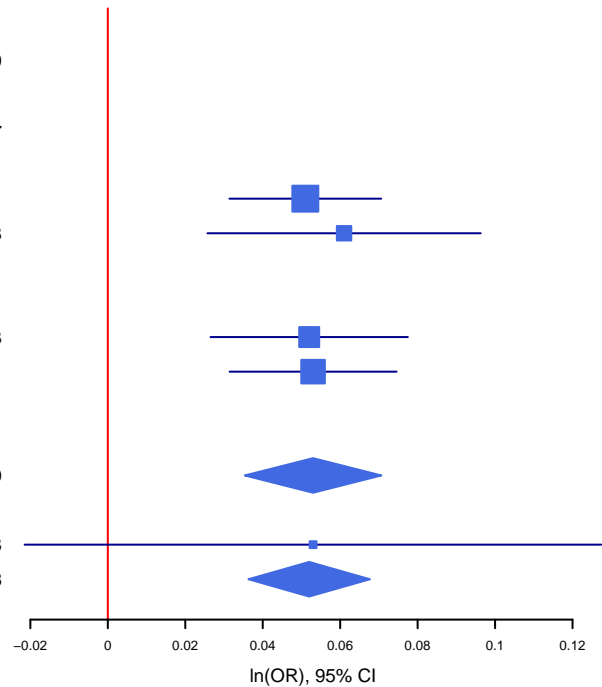



| rs704364                                           | A/G       |             | 3:63874734      |                     |                      |             |              |
|----------------------------------------------------|-----------|-------------|-----------------|---------------------|----------------------|-------------|--------------|
|                                                    | ++        |             | het_P:          | 0.03                | het_I:               | 78.8        |              |
|                                                    | ngt       | info        | p_value         | f_ca(n)             | f_co(n)              | ln(OR)      | STDerr       |
| PGC_SCZ wave3 eur only                             | 18        | 0.99        | 4.82e-11        | 0.316(53386)        | 0.304(77258)         | 0.061       | 0.009        |
| PGC_SCZ wave3 asn only                             | 2         | 0.97        | 0.456           | 0.513(14004)        | 0.51(16757)          | 0.013       | 0.017        |
| PGC_SCZ wave2 only                                 | 16        | 1.00        | 4.89e-09        | 0.325(34850)        | 0.308(44347)         | 0.068       | 0.012        |
| PGC_SCZ wave3 (excl. wave2)                        | 4         | 0.98        | 0.00434         | 0.391(32540)        | 0.369(49668)         | 0.033       | 0.012        |
| <b>PGC_SCZ wave3 (incl. wave2)</b>                 | <b>20</b> | <b>0.99</b> | <b>8.41e-10</b> | <b>0.357(67390)</b> | <b>0.34(94015)</b>   | <b>0.05</b> | <b>0.008</b> |
| Decode – Replication                               | 0         | 1.00        | 0.455           | 0.287(1979)         | 0.269(142627)        | 0.033       | 0.042        |
| <b>PGC_SCZ wave3 (incl. wave2 and replication)</b> | <b>20</b> | <b>1.00</b> | <b>7.07e-10</b> | <b>0.355(69369)</b> | <b>0.297(236642)</b> | <b>0.05</b> | <b>0.008</b> |

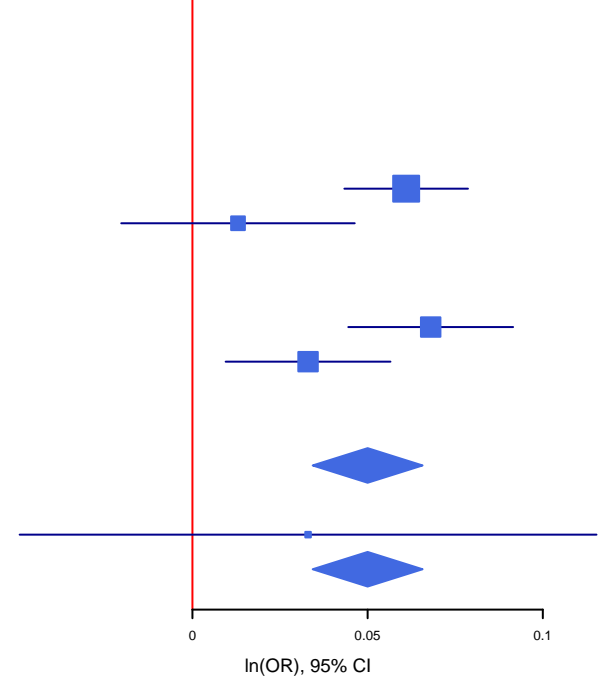

| rs11076631                                         | A/G      |             | 16:89877975     |                     |                      |              |              |
|----------------------------------------------------|----------|-------------|-----------------|---------------------|----------------------|--------------|--------------|
|                                                    | ++       |             | het_P:          | 0.749               | het_I:               | 0.0          |              |
|                                                    | ngt      | info        | p_value         | f_ca(n)             | f_co(n)              | ln(OR)       | STDerr       |
| PGC_SCZ wave3 eur only                             | 1        | 0.99        | 1.06e-08        | 0.623(53386)        | 0.611(77258)         | 0.051        | 0.009        |
| PGC_SCZ wave3 asn only                             | 3        | 0.82        | 0.0688          | 0.051(14004)        | 0.043(16757)         | 0.088        | 0.048        |
| PGC_SCZ wave2 only                                 | 2        | 0.99        | 1.69e-06        | 0.59(34850)         | 0.597(44347)         | 0.055        | 0.011        |
| PGC_SCZ wave3 (excl. wave2)                        | 2        | 0.93        | 0.000374        | 0.412(32540)        | 0.432(49668)         | 0.049        | 0.014        |
| <b>PGC_SCZ wave3 (incl. wave2)</b>                 | <b>4</b> | <b>0.96</b> | <b>2.59e-09</b> | <b>0.504(67390)</b> | <b>0.51(94015)</b>   | <b>0.052</b> | <b>0.009</b> |
| Decode – Replication                               | 0        | 1.00        | 0.0889          | 0.646(1979)         | 0.619(142627)        | 0.049        | 0.04         |
| <b>PGC_SCZ wave3 (incl. wave2 and replication)</b> | <b>4</b> | <b>0.98</b> | <b>7.29e-10</b> | <b>0.508(69369)</b> | <b>0.576(236642)</b> | <b>0.053</b> | <b>0.009</b> |

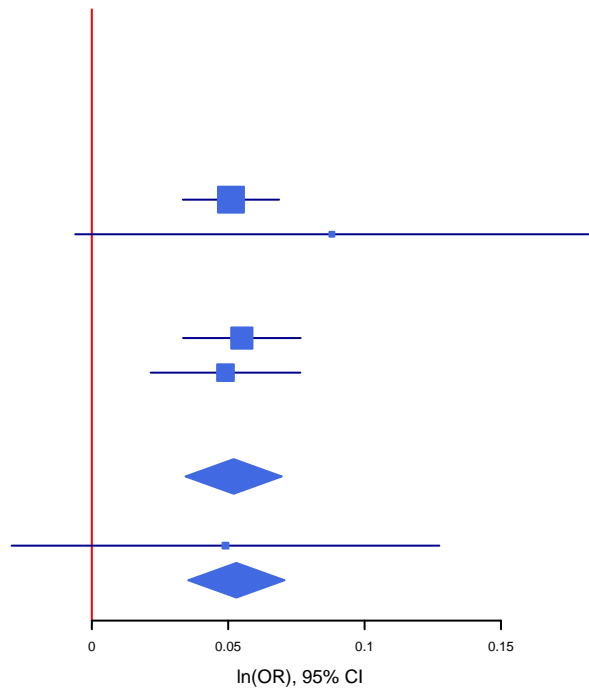



| rs6504163                                          | C/T      |             | 17:61545779     |                     |                      |               |              |
|----------------------------------------------------|----------|-------------|-----------------|---------------------|----------------------|---------------|--------------|
|                                                    | ++       |             | het_P:          | 0.128               | het_I:               | 56.9          |              |
|                                                    | ngt      | info        | p_value         | f_ca(n)             | f_co(n)              | ln(OR)        | STDerr       |
| PGC_SCZ wave3 eur only                             | 0        | 0.96        | 1.57e-06        | 0.369(53386)        | 0.379(77258)         | -0.044        | 0.009        |
| PGC_SCZ wave3 asn only                             | 0        | 0.89        | 0.000105        | 0.343(14004)        | 0.355(16757)         | -0.073        | 0.019        |
| PGC_SCZ wave2 only                                 | 0        | 0.94        | 0.00136         | 0.371(34850)        | 0.379(44347)         | -0.037        | 0.012        |
| PGC_SCZ wave3 (excl. wave2)                        | 0        | 0.95        | 1.12e-07        | 0.355(32540)        | 0.371(49668)         | -0.062        | 0.012        |
| <b>PGC_SCZ wave3 (incl. wave2)</b>                 | <b>0</b> | <b>0.94</b> | <b>1.87e-09</b> | <b>0.364(67390)</b> | <b>0.375(94015)</b>  | <b>-0.049</b> | <b>0.008</b> |
| Decode – Replication                               | 0        | 1.00        | 0.192           | 0.41(1979)          | 0.422(142627)        | -0.062        | 0.039        |
| <b>PGC_SCZ wave3 (incl. wave2 and replication)</b> | <b>0</b> | <b>0.97</b> | <b>8.25e-10</b> | <b>0.365(69369)</b> | <b>0.404(236642)</b> | <b>-0.049</b> | <b>0.008</b> |

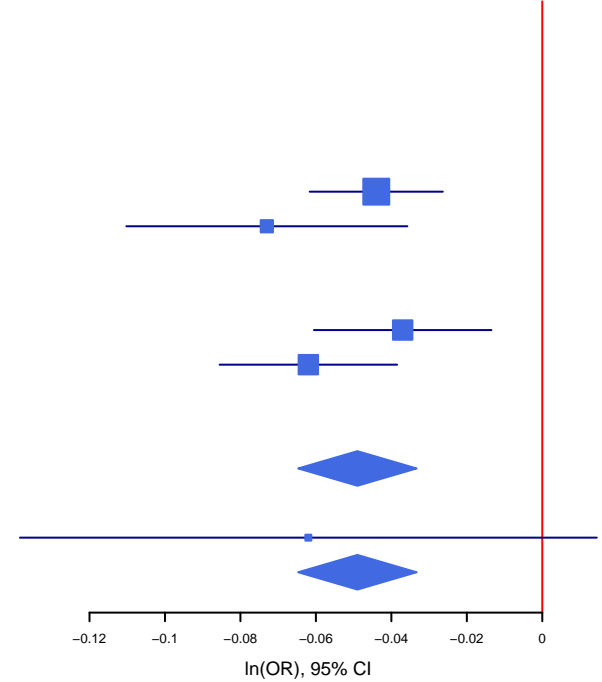

|                                                    |            |             |                 |            |                     |                      |               |               |        |  |      |
|----------------------------------------------------|------------|-------------|-----------------|------------|---------------------|----------------------|---------------|---------------|--------|--|------|
| <b>rs9636429</b>                                   |            |             |                 | <b>G/A</b> |                     | <b>2:37215607</b>    |               |               |        |  |      |
|                                                    |            |             |                 | ++         |                     | het_P:               |               | 0.096         | het_I: |  | 63.9 |
|                                                    | <b>ngt</b> | <b>info</b> | <b>p_value</b>  |            | <b>f_ca(n)</b>      | <b>f_co(n)</b>       | <b>ln(OR)</b> | <b>STDerr</b> |        |  |      |
| PGC_SCZ wave3 eur only                             | 0          | 0.99        | 4.33e-06        |            | 0.772(53386)        | 0.779(77258)         | -0.048        | 0.01          |        |  |      |
| PGC_SCZ wave3 asn only                             | 0          | 0.95        | 2.3e-05         |            | 0.381(14004)        | 0.395(16757)         | -0.076        | 0.018         |        |  |      |
| PGC_SCZ wave2 only                                 | 0          | 0.99        | 0.00254         |            | 0.754(34850)        | 0.771(44347)         | -0.039        | 0.013         |        |  |      |
| PGC_SCZ wave3 (excl. wave2)                        | 0          | 0.97        | 2.89e-08        |            | 0.624(32540)        | 0.657(49668)         | -0.069        | 0.012         |        |  |      |
| <b>PGC_SCZ wave3 (incl. wave2)</b>                 | <b>0</b>   | <b>0.98</b> | <b>1.1e-09</b>  |            | <b>0.691(67390)</b> | <b>0.711(94015)</b>  | <b>-0.055</b> | <b>0.009</b>  |        |  |      |
| Decode – Replication                               | 0          | 1.00        | 0.37            |            | 0.793(1979)         | 0.798(142627)        | -0.069        | 0.047         |        |  |      |
| <b>PGC_SCZ wave3 (incl. wave2 and replication)</b> | <b>0</b>   | <b>0.99</b> | <b>8.39e-10</b> |            | <b>0.694(69369)</b> | <b>0.764(236642)</b> | <b>-0.054</b> | <b>0.009</b>  |        |  |      |

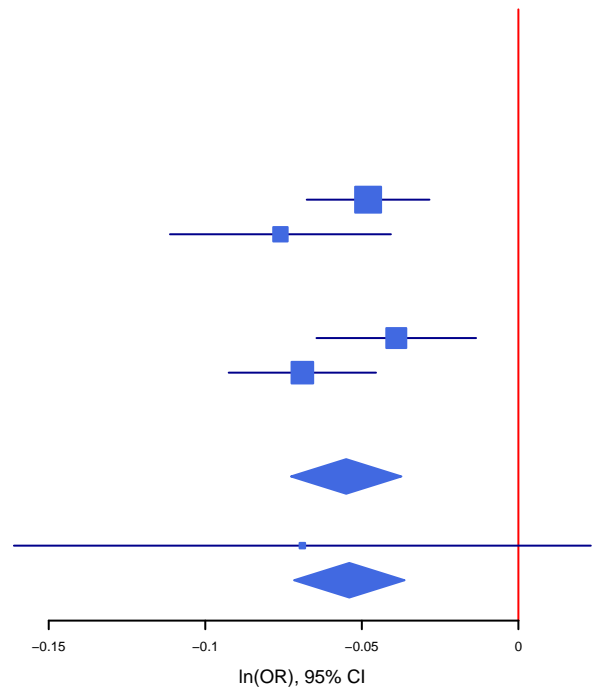

|                                                    |           |             |                 |                     |                      |              |              |
|----------------------------------------------------|-----------|-------------|-----------------|---------------------|----------------------|--------------|--------------|
| rs61828917                                         | C/T       |             | 1:173580303     |                     |                      |              |              |
|                                                    | --        |             | het_P:          |                     | 0.691                | het_I:       | 0.0          |
|                                                    | ngt       | info        | p_value         | f_ca(n)             | f_co(n)              | ln(OR)       | STDerr       |
| PGC_SCZ wave3 eur only                             | 7         | 0.99        | 2.45e-07        | 0.88(53386)         | 0.874(77258)         | 0.068        | 0.013        |
| PGC_SCZ wave3 asn only                             | 3         | 0.97        | 0.000847        | 0.75(14004)         | 0.742(16757)         | 0.067        | 0.02         |
| PGC_SCZ wave2 only                                 | 2         | 0.99        | 0.000124        | 0.873(34850)        | 0.872(44347)         | 0.063        | 0.016        |
| PGC_SCZ wave3 (excl. wave2)                        | 8         | 0.98        | 1.46e-06        | 0.833(32540)        | 0.832(49668)         | 0.072        | 0.015        |
| <b>PGC_SCZ wave3 (incl. wave2)</b>                 | <b>10</b> | <b>0.98</b> | <b>7.95e-10</b> | <b>0.853(67390)</b> | <b>0.851(94015)</b>  | <b>0.068</b> | <b>0.011</b> |
| Decode – Replication                               | 0         | 1.00        | 0.612           | 0.881(1979)         | 0.901(142627)        | 0.072        | 0.06         |
| <b>PGC_SCZ wave3 (incl. wave2 and replication)</b> | <b>10</b> | <b>0.99</b> | <b>8.41e-10</b> | <b>0.854(69369)</b> | <b>0.881(236642)</b> | <b>0.066</b> | <b>0.011</b> |

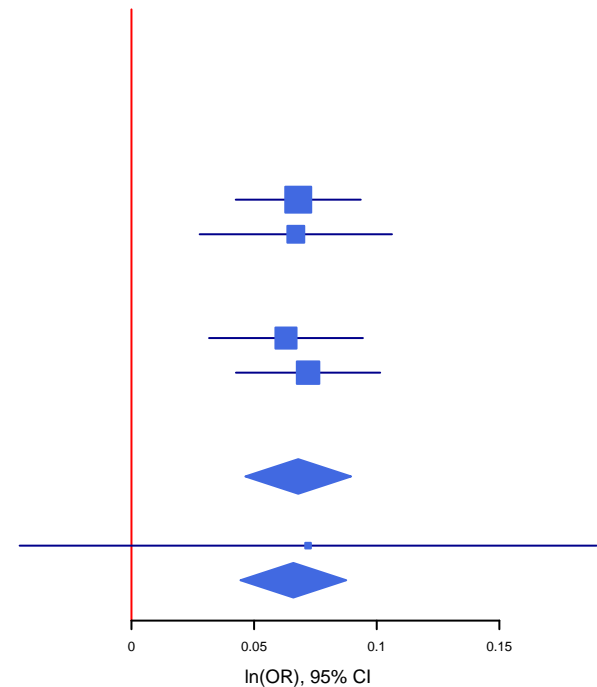

rs39967

T/C

5:57744788

—

het\_P:

0.627

het\_I:

0.0

ngt info p\_value f\_ca(n) f\_co(n) ln(OR) STDerr

PGC\_SCZ wave3 eur only

13 0.99 4.38e-08 0.169(53386) 0.179(77258) -0.062 0.011

PGC\_SCZ wave3 asn only

3 0.96 0.164 0.079(14004) 0.081(16757) -0.044 0.032

PGC\_SCZ wave2 only

13 0.99 0.000118 0.164(34850) 0.175(44347) -0.056 0.014

PGC\_SCZ wave3 (excl. wave2)

3 0.98 3.66e-05 0.135(32540) 0.149(49668) -0.066 0.016

PGC\_SCZ wave3 (incl. wave2)

16 0.99 1.87e-08 0.15(67390) 0.161(94015) -0.06 0.011

Decode – Replication

0 1.00 0.00446 0.17(1979) 0.189(142627) -0.066 0.051

PGC\_SCZ wave3 (incl. wave2 and replication)

16 0.99 9.94e-10 0.151(69369) 0.178(236642) -0.064 0.01

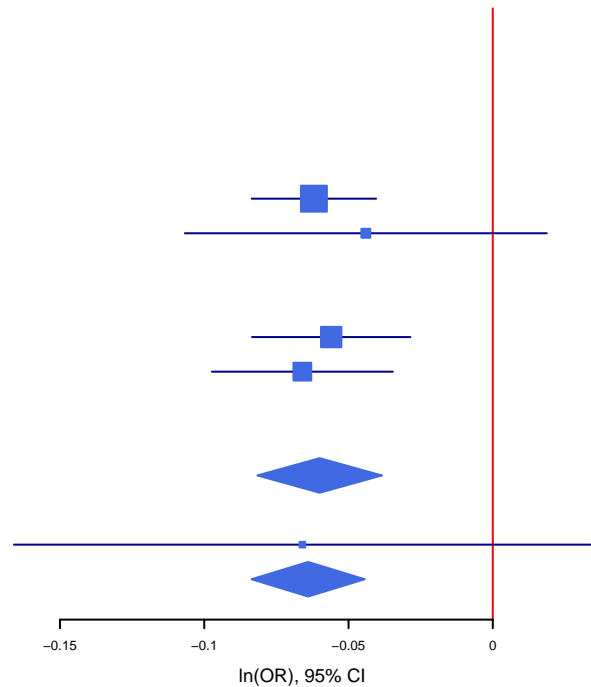

rs298216

C/G

8:65293195

—

het\_P:

0.413

het\_I:

0.0

ngt info p\_value f\_ca(n) f\_co(n) ln(OR) STDerr

PGC\_SCZ wave3 eur only

0 0.99 0.000144 0.098(53386) 0.1(77258) -0.056 0.015

PGC\_SCZ wave3 asn only

0 0.95 5.35e-07 0.173(14004) 0.191(16757) -0.114 0.023

PGC\_SCZ wave2 only

0 0.99 0.000929 0.097(34850) 0.099(44347) -0.061 0.018

PGC\_SCZ wave3 (excl. wave2)

0 0.97 6.95e-07 0.131(32540) 0.131(49668) -0.082 0.016

PGC\_SCZ wave3 (incl. wave2)

0 0.98 3.44e-09 0.113(67390) 0.116(94015) -0.073 0.012

Decode – Replication

0 1.00 0.124 0.11(1979) 0.083(142627) -0.082 0.065

PGC\_SCZ wave3 (incl. wave2 and replication)

0 0.99 1.11e-09 0.113(69369) 0.096(236642) -0.074 0.012

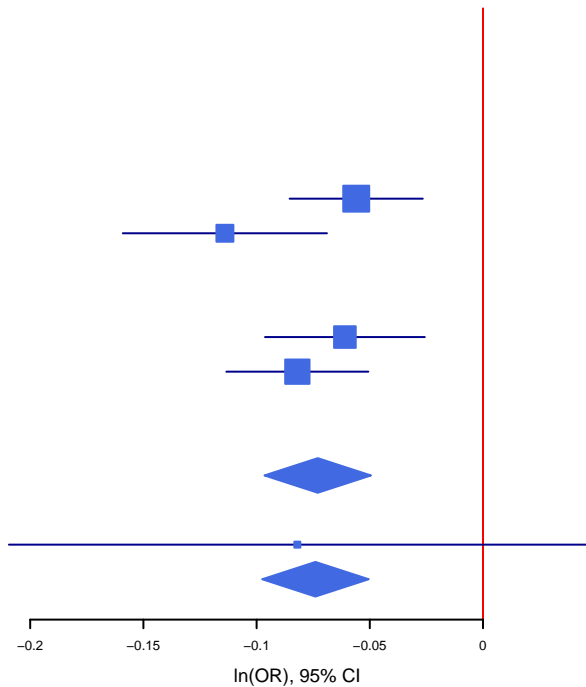



rs11619756

|     |                         |
|-----|-------------------------|
| G/A | 13:44329004             |
| --- | het_P: 0.454 het_I: 0.0 |

|                                             | ngt | info | p_value  | f_ca(n)      | f_co(n)       | ln(OR) | STDerr |
|---------------------------------------------|-----|------|----------|--------------|---------------|--------|--------|
| PGC_SCZ wave3 eur only                      | 27  | 0.99 | 8.91e-07 | 0.454(53386) | 0.438(77258)  | 0.043  | 0.009  |
| PGC_SCZ wave3 asn only                      | 6   | 0.96 | 0.00092  | 0.825(14004) | 0.817(16757)  | 0.076  | 0.023  |
| PGC_SCZ wave2 only                          | 26  | 1.00 | 0.00018  | 0.472(34850) | 0.447(44347)  | 0.041  | 0.011  |
| PGC_SCZ wave3 (excl. wave2)                 | 7   | 0.98 | 8.48e-06 | 0.594(32540) | 0.558(49668)  | 0.054  | 0.012  |
| PGC_SCZ wave3 (incl. wave2)                 | 33  | 0.99 | 7.97e-09 | 0.531(67390) | 0.506(94015)  | 0.047  | 0.008  |
| Decode - Replication                        | 0   | 1.00 | 0.0255   | 0.451(1979)  | 0.407(142627) | 0.054  | 0.038  |
| PGC_SCZ wave3 (incl. wave2 and replication) | 33  | 0.99 | 1.16e-09 | 0.529(69369) | 0.446(236642) | 0.049  | 0.008  |

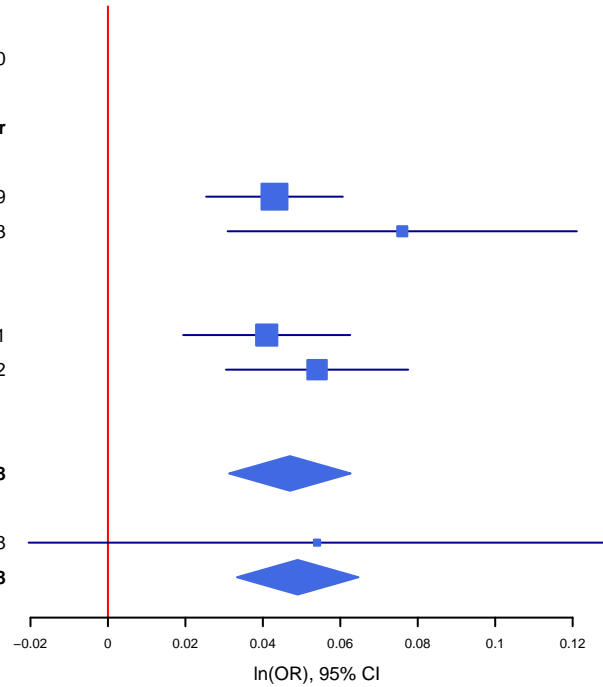

rs17571951

T/C

14:30017039

---

het\_P:

0.602

het\_I:

0.0

| ngt | info | p_value | f_ca(n) | f_co(n) | ln(OR) | STDerr |
|-----|------|---------|---------|---------|--------|--------|
|-----|------|---------|---------|---------|--------|--------|

PGC\_SCZ wave3 eur only

|   |      |          |              |              |        |      |
|---|------|----------|--------------|--------------|--------|------|
| 1 | 0.98 | 9.97e-10 | 0.778(53386) | 0.785(77258) | -0.064 | 0.01 |
|---|------|----------|--------------|--------------|--------|------|

PGC\_SCZ wave3 asn only

|     |     |     |          |          |     |     |
|-----|-----|-----|----------|----------|-----|-----|
| nan | nan | nan | nan(nan) | nan(nan) | nan | nan |
|-----|-----|-----|----------|----------|-----|-----|

PGC\_SCZ wave2 only

|   |      |          |              |              |        |       |
|---|------|----------|--------------|--------------|--------|-------|
| 1 | 0.99 | 2.86e-07 | 0.775(32998) | 0.784(43387) | -0.069 | 0.013 |
|---|------|----------|--------------|--------------|--------|-------|

PGC\_SCZ wave3 (excl. wave2)

|   |      |          |              |              |        |       |
|---|------|----------|--------------|--------------|--------|-------|
| 0 | 0.97 | 0.000619 | 0.792(21622) | 0.792(34903) | -0.058 | 0.017 |
|---|------|----------|--------------|--------------|--------|-------|

PGC\_SCZ wave3 (incl. wave2)

|   |      |          |              |              |        |      |
|---|------|----------|--------------|--------------|--------|------|
| 1 | 0.98 | 7.89e-10 | 0.782(54620) | 0.788(78290) | -0.064 | 0.01 |
|---|------|----------|--------------|--------------|--------|------|

Decode - Replication

|   |      |       |             |               |        |       |
|---|------|-------|-------------|---------------|--------|-------|
| 0 | 1.00 | 0.719 | 0.796(1979) | 0.773(142627) | -0.058 | 0.046 |
|---|------|-------|-------------|---------------|--------|-------|

PGC\_SCZ wave3 (incl. wave2 and replication)

|   |      |          |              |               |        |      |
|---|------|----------|--------------|---------------|--------|------|
| 1 | 0.99 | 1.31e-09 | 0.782(56599) | 0.779(220917) | -0.062 | 0.01 |
|---|------|----------|--------------|---------------|--------|------|

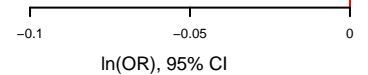

| rs7811417                                          | T/C       |             | 7:21534152      |                     |                      |              |              |
|----------------------------------------------------|-----------|-------------|-----------------|---------------------|----------------------|--------------|--------------|
|                                                    | ++        |             | het_P:          | 0.931               | het_I:               | 0.0          |              |
|                                                    | ngt       | info        | p_value         | f_ca(n)             | f_co(n)              | ln(OR)       | STDerr       |
| PGC_SCZ wave3 eur only                             | 29        | 1.00        | 1.65e-06        | 0.339(53386)        | 0.327(77258)         | 0.044        | 0.009        |
| PGC_SCZ wave3 asn only                             | 5         | 0.98        | 0.000181        | 0.447(14004)        | 0.437(16757)         | 0.065        | 0.017        |
| PGC_SCZ wave2 only                                 | 20        | 0.99        | 1.97e-05        | 0.345(34850)        | 0.329(44347)         | 0.049        | 0.012        |
| PGC_SCZ wave3 (excl. wave2)                        | 14        | 0.99        | 2.72e-05        | 0.378(32540)        | 0.362(49668)         | 0.048        | 0.011        |
| <b>PGC_SCZ wave3 (incl. wave2)</b>                 | <b>34</b> | <b>0.99</b> | <b>2.17e-09</b> | <b>0.361(67390)</b> | <b>0.347(94015)</b>  | <b>0.048</b> | <b>0.008</b> |
| Decode – Replication                               | 0         | 1.00        | 0.276           | 0.331(1979)         | 0.344(142627)        | 0.048        | 0.04         |
| <b>PGC_SCZ wave3 (incl. wave2 and replication)</b> | <b>34</b> | <b>1.00</b> | <b>1.35e-09</b> | <b>0.36(69369)</b>  | <b>0.345(236642)</b> | <b>0.048</b> | <b>0.008</b> |

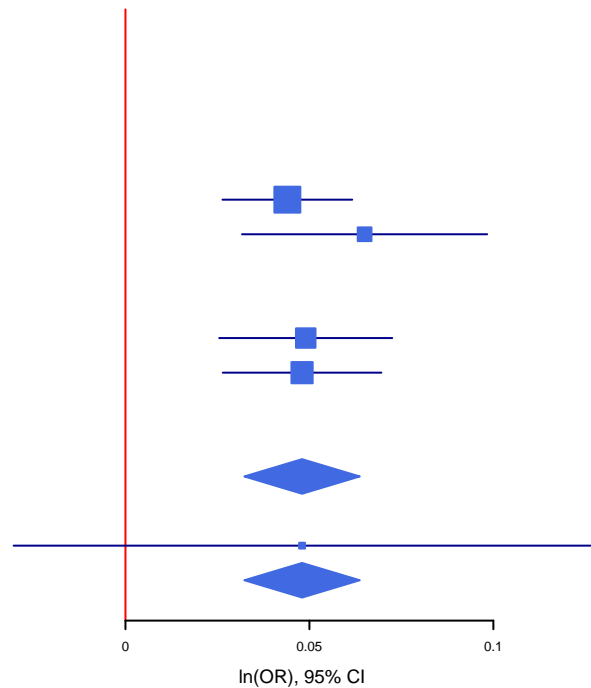

rs356183

G/C

4:90626098

—

het\_P:

0.489

het\_I:

0.0

| ngt | info | p_value | f_ca(n) | f_co(n) | ln(OR) | STDerr |
|-----|------|---------|---------|---------|--------|--------|
|-----|------|---------|---------|---------|--------|--------|

PGC\_SCZ wave3 eur only

|   |      |          |              |              |       |       |
|---|------|----------|--------------|--------------|-------|-------|
| 0 | 0.96 | 3.09e-06 | 0.449(53386) | 0.438(77258) | 0.041 | 0.009 |
|---|------|----------|--------------|--------------|-------|-------|

PGC\_SCZ wave3 asn only

|   |      |         |              |              |       |       |
|---|------|---------|--------------|--------------|-------|-------|
| 0 | 0.85 | 0.00217 | 0.635(14004) | 0.626(16757) | 0.059 | 0.019 |
|---|------|---------|--------------|--------------|-------|-------|

PGC\_SCZ wave2 only

|   |      |          |              |              |       |       |
|---|------|----------|--------------|--------------|-------|-------|
| 0 | 0.96 | 0.000484 | 0.458(34850) | 0.441(44347) | 0.039 | 0.011 |
|---|------|----------|--------------|--------------|-------|-------|

PGC\_SCZ wave3 (excl. wave2)

|   |      |          |              |              |      |       |
|---|------|----------|--------------|--------------|------|-------|
| 0 | 0.92 | 1.47e-05 | 0.519(32540) | 0.498(49668) | 0.05 | 0.012 |
|---|------|----------|--------------|--------------|------|-------|

PGC\_SCZ wave3 (incl. wave2)

|   |      |          |              |              |       |       |
|---|------|----------|--------------|--------------|-------|-------|
| 0 | 0.94 | 3.37e-08 | 0.487(67390) | 0.471(94015) | 0.044 | 0.008 |
|---|------|----------|--------------|--------------|-------|-------|

Decode – Replication

|   |      |        |             |               |      |       |
|---|------|--------|-------------|---------------|------|-------|
| 0 | 1.00 | 0.0017 | 0.428(1979) | 0.414(142627) | 0.05 | 0.039 |
|---|------|--------|-------------|---------------|------|-------|

PGC\_SCZ wave3 (incl. wave2 and replication)

|   |      |          |              |               |       |       |
|---|------|----------|--------------|---------------|-------|-------|
| 0 | 0.97 | 1.37e-09 | 0.485(69369) | 0.437(236642) | 0.048 | 0.008 |
|---|------|----------|--------------|---------------|-------|-------|

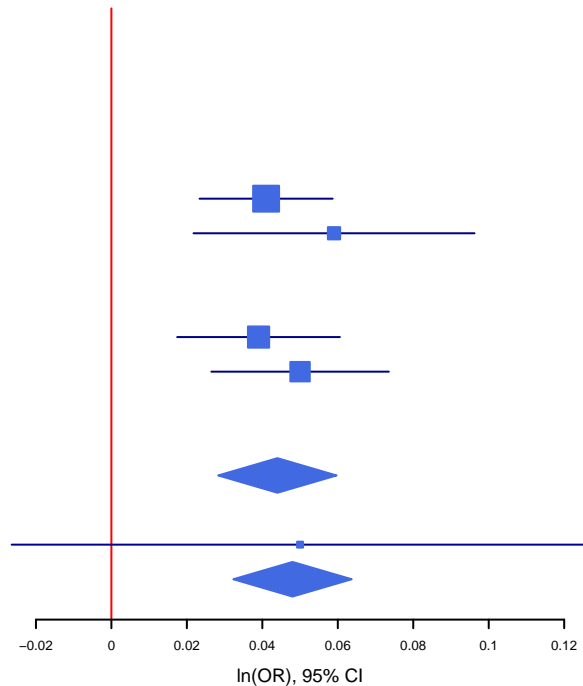

|                                                    |          |             |                 |                     |                      |               |              |
|----------------------------------------------------|----------|-------------|-----------------|---------------------|----------------------|---------------|--------------|
| rs2206956                                          | G/A      |             | 6:146739228     |                     |                      |               |              |
|                                                    | ++       |             | het_P:          |                     | 0.09                 | het_I:        | 65.3         |
|                                                    | ngt      | info        | p_value         | f_ca(n)             | f_co(n)              | ln(OR)        | STDerr       |
| PGC_SCZ wave3 eur only                             | 0        | 0.99        | 7.01e-07        | 0.462(53386)        | 0.476(77258)         | -0.043        | 0.009        |
| PGC_SCZ wave3 asn only                             | 0        | 0.96        | 0.000643        | 0.437(14004)        | 0.446(16757)         | -0.06         | 0.018        |
| PGC_SCZ wave2 only                                 | 0        | 1.00        | 0.00206         | 0.467(34850)        | 0.479(44347)         | -0.033        | 0.011        |
| PGC_SCZ wave3 (excl. wave2)                        | 0        | 0.97        | 7.58e-08        | 0.445(32540)        | 0.464(49668)         | -0.06         | 0.011        |
| <b>PGC_SCZ wave3 (incl. wave2)</b>                 | <b>0</b> | <b>0.99</b> | <b>2.51e-09</b> | <b>0.457(67390)</b> | <b>0.471(94015)</b>  | <b>-0.046</b> | <b>0.008</b> |
| Decode – Replication                               | 0        | 1.00        | 0.207           | 0.461(1979)         | 0.471(142627)        | -0.06         | 0.038        |
| <b>PGC_SCZ wave3 (incl. wave2 and replication)</b> | <b>0</b> | <b>0.99</b> | <b>1.4e-09</b>  | <b>0.457(69369)</b> | <b>0.471(236642)</b> | <b>-0.046</b> | <b>0.008</b> |

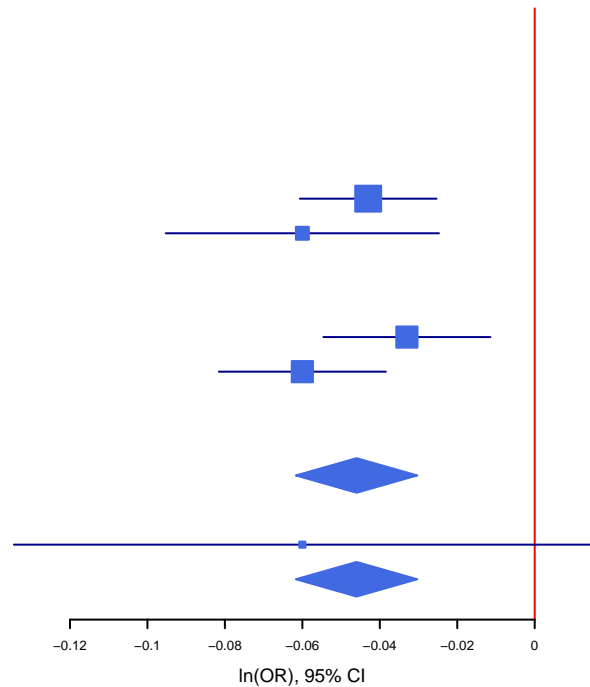

rs143116451

|     |                         |
|-----|-------------------------|
| C/A | 12:122523850            |
| ++  | het_P: 0.762 het_I: 0.0 |

|                                             | ngt | info | p_value  | f_ca(n)      | f_co(n)       | ln(OR) | STDerr |
|---------------------------------------------|-----|------|----------|--------------|---------------|--------|--------|
| PGC_SCZ wave3 eur only                      | 0   | 0.95 | 9.29e-06 | 0.532(53386) | 0.541(77258)  | -0.039 | 0.009  |
| PGC_SCZ wave3 asn only                      | 0   | 0.90 | 0.000463 | 0.495(14004) | 0.507(16757)  | -0.062 | 0.018  |
| PGC_SCZ wave2 only                          | 0   | 0.95 | 3.43e-05 | 0.53(34850)  | 0.543(44347)  | -0.046 | 0.011  |
| PGC_SCZ wave3 (excl. wave2)                 | 0   | 0.94 | 0.00024  | 0.517(32540) | 0.527(49668)  | -0.041 | 0.011  |
| PGC_SCZ wave3 (incl. wave2)                 | 0   | 0.94 | 3.23e-08 | 0.524(67390) | 0.535(94015)  | -0.044 | 0.008  |
| Decode - Replication                        | 0   | 1.00 | 0.00222  | 0.515(1979)  | 0.483(142627) | -0.041 | 0.038  |
| PGC_SCZ wave3 (incl. wave2 and replication) | 0   | 0.98 | 1.44e-09 | 0.524(69369) | 0.504(236642) | -0.047 | 0.008  |

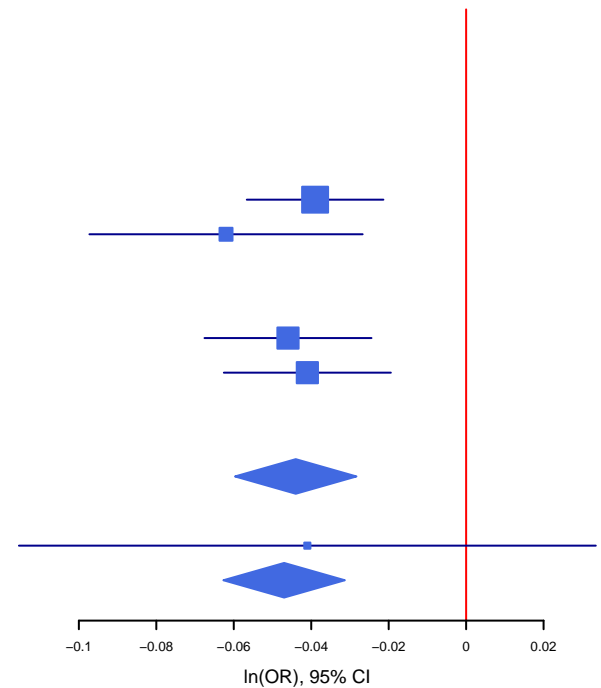

|                                                    |           |             |                 |                     |                     |              |              |
|----------------------------------------------------|-----------|-------------|-----------------|---------------------|---------------------|--------------|--------------|
| rs581459                                           | C/T       |             | 1:36375110      |                     |                     |              |              |
|                                                    | --        |             | het_P:          |                     | 0.805               | het_I:       | 0.0          |
|                                                    | ngt       | info        | p_value         | f_ca(n)             | f_co(n)             | ln(OR)       | STDerr       |
| PGC_SCZ wave3 eur only                             | 20        | 0.99        | 2.6e-07         | 0.92(53386)         | 0.917(77258)        | 0.082        | 0.016        |
| PGC_SCZ wave3 asn only                             | 5         | 0.91        | 0.000985        | 0.379(14004)        | 0.358(16757)        | 0.063        | 0.019        |
| PGC_SCZ wave2 only                                 | 20        | 0.99        | 7.05e-05        | 0.89(34850)         | 0.905(44347)        | 0.078        | 0.02         |
| PGC_SCZ wave3 (excl. wave2)                        | 5         | 0.97        | 4.48e-06        | 0.72(32540)         | 0.739(49668)        | 0.072        | 0.016        |
| <b>PGC_SCZ wave3 (incl. wave2)</b>                 | <b>25</b> | <b>0.98</b> | <b>1.32e-09</b> | <b>0.808(67390)</b> | <b>0.817(94015)</b> | <b>0.074</b> | <b>0.012</b> |
| Decode - Replication                               | 0         | 1.00        | 0.558           | 0.907(1979)         | 0.922(142627)       | 0.072        | 0.067        |
| <b>PGC_SCZ wave3 (incl. wave2 and replication)</b> | <b>25</b> | <b>0.99</b> | <b>1.48e-09</b> | <b>0.811(69369)</b> | <b>0.88(236642)</b> | <b>0.073</b> | <b>0.012</b> |

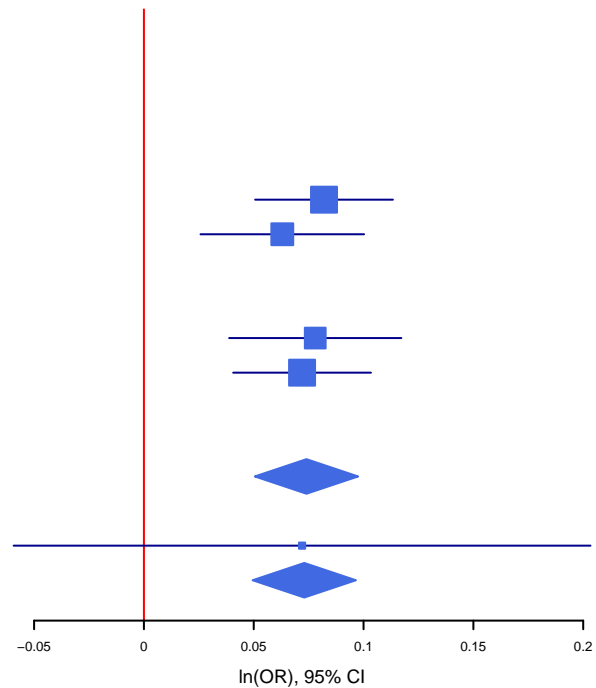

rs58950470

G/T  
++  
11:65383755  
het\_P: 0.316  
het\_I: 0.6

|                                             | ngt | info | p_value  | f_ca(n)      | f_co(n)       | ln(OR) | STDerr |
|---------------------------------------------|-----|------|----------|--------------|---------------|--------|--------|
| PGC_SCZ wave3 eur only                      | 0   | 0.99 | 7.18e-08 | 0.656(53386) | 0.665(77258)  | -0.049 | 0.009  |
| PGC_SCZ wave3 asn only                      | 0   | 0.97 | 0.0561   | 0.882(14004) | 0.886(16757)  | -0.051 | 0.027  |
| PGC_SCZ wave2 only                          | 0   | 1.00 | 8.66e-07 | 0.67(34850)  | 0.676(44347)  | -0.057 | 0.012  |
| PGC_SCZ wave3 (excl. wave2)                 | 0   | 0.98 | 0.0021   | 0.738(32540) | 0.73(49668)   | -0.04  | 0.013  |
| PGC_SCZ wave3 (incl. wave2)                 | 0   | 0.99 | 1.1e-08  | 0.703(67390) | 0.705(94015)  | -0.049 | 0.009  |
| Decode - Replication                        | 0   | 1.00 | 0.0421   | 0.664(1979)  | 0.652(142627) | -0.04  | 0.039  |
| PGC_SCZ wave3 (incl. wave2 and replication) | 0   | 1.00 | 1.6e-09  | 0.702(69369) | 0.673(236642) | -0.051 | 0.008  |

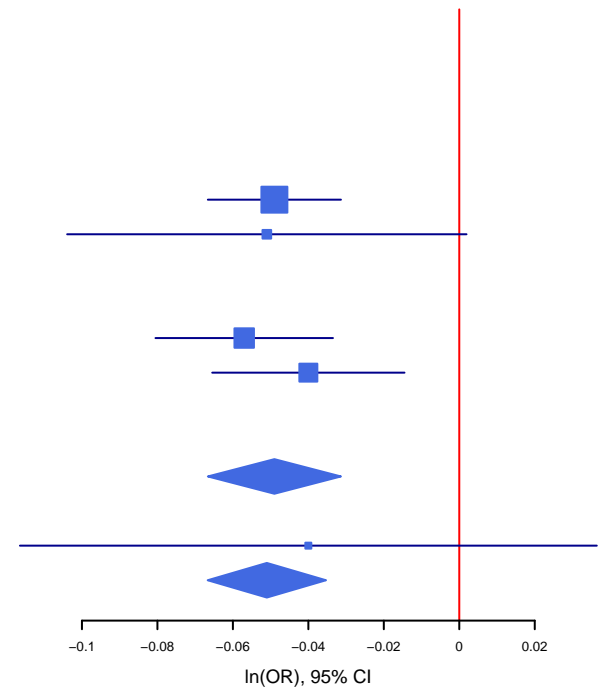



21:16439883

| rs9813516                                          | G/A      |             | 3:60293004      |                     |                      |               |              |
|----------------------------------------------------|----------|-------------|-----------------|---------------------|----------------------|---------------|--------------|
|                                                    | ++       |             | het_P:          | 0.129               | het_I:               | 56.7          |              |
|                                                    | ngt      | info        | p_value         | f_ca(n)             | f_co(n)              | ln(OR)        | STDerr       |
| PGC_SCZ wave3 eur only                             | 2        | 0.99        | 2.19e-09        | 0.647(53386)        | 0.658(77258)         | -0.054        | 0.009        |
| PGC_SCZ wave3 asn only                             | 0        | 0.90        | 0.163           | 0.21(14004)         | 0.202(16757)         | -0.032        | 0.023        |
| PGC_SCZ wave2 only                                 | 2        | 0.98        | 4.21e-08        | 0.622(34850)        | 0.648(44347)         | -0.063        | 0.012        |
| PGC_SCZ wave3 (excl. wave2)                        | 0        | 0.97        | 0.00248         | 0.485(32540)        | 0.513(49668)         | -0.038        | 0.012        |
| <b>PGC_SCZ wave3 (incl. wave2)</b>                 | <b>2</b> | <b>0.97</b> | <b>1.25e-09</b> | <b>0.556(67390)</b> | <b>0.577(94015)</b>  | <b>-0.051</b> | <b>0.008</b> |
| Decode – Replication                               | 0        | 1.00        | 0.832           | 0.69(1979)          | 0.727(142627)        | -0.038        | 0.041        |
| <b>PGC_SCZ wave3 (incl. wave2 and replication)</b> | <b>2</b> | <b>0.99</b> | <b>1.67e-09</b> | <b>0.56(69369)</b>  | <b>0.667(236642)</b> | <b>-0.05</b>  | <b>0.008</b> |

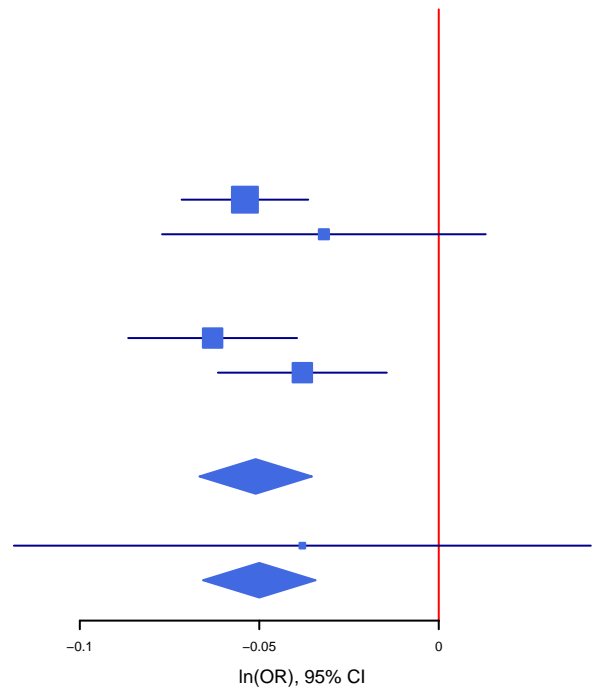

|                                                    |            |             |                 |                     |                      |               |               |
|----------------------------------------------------|------------|-------------|-----------------|---------------------|----------------------|---------------|---------------|
| <b>rs7002992</b>                                   |            | <b>T/C</b>  |                 | <b>8:103676605</b>  |                      |               |               |
|                                                    |            | ++          |                 | het_P:              | 0.981                | het_I:        | 0.0           |
|                                                    | <b>ngt</b> | <b>info</b> | <b>p_value</b>  | <b>f_ca(n)</b>      | <b>f_co(n)</b>       | <b>ln(OR)</b> | <b>STDerr</b> |
| PGC_SCZ wave3 eur only                             | 1          | 0.99        | 6.95e-07        | 0.646(53386)        | 0.638(77258)         | 0.045         | 0.009         |
| PGC_SCZ wave3 asn only                             | 0          | 0.92        | 0.00101         | 0.757(14004)        | 0.751(16757)         | 0.068         | 0.02          |
| PGC_SCZ wave2 only                                 | 0          | 1.00        | 1.85e-05        | 0.653(34850)        | 0.639(44347)         | 0.049         | 0.011         |
| PGC_SCZ wave3 (excl. wave2)                        | 1          | 0.96        | 6.12e-05        | 0.686(32540)        | 0.675(49668)         | 0.048         | 0.012         |
| <b>PGC_SCZ wave3 (incl. wave2)</b>                 | <b>1</b>   | <b>0.98</b> | <b>4.48e-09</b> | <b>0.669(67390)</b> | <b>0.658(94015)</b>  | <b>0.048</b>  | <b>0.008</b>  |
| Decode – Replication                               | 0          | 1.00        | 0.119           | 0.647(1979)         | 0.648(142627)        | 0.048         | 0.04          |
| <b>PGC_SCZ wave3 (incl. wave2 and replication)</b> | <b>1</b>   | <b>0.99</b> | <b>1.68e-09</b> | <b>0.668(69369)</b> | <b>0.652(236642)</b> | <b>0.049</b>  | <b>0.008</b>  |

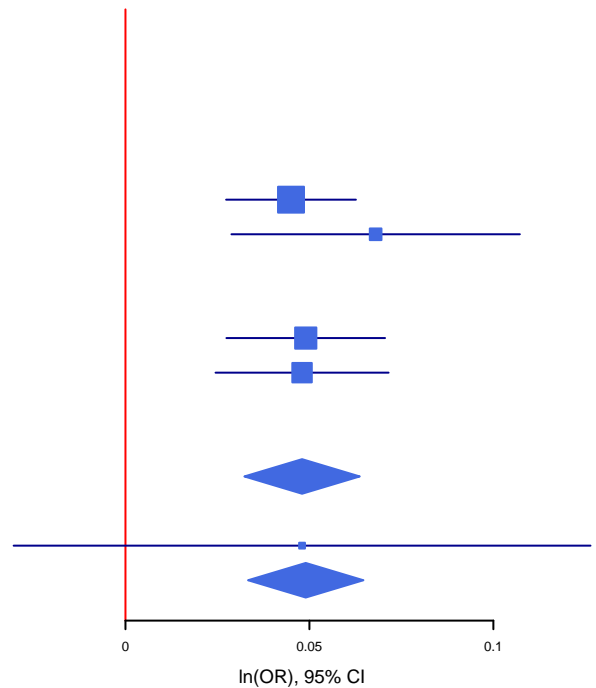

|                                                    |          |             |                 |                     |                      |              |              |
|----------------------------------------------------|----------|-------------|-----------------|---------------------|----------------------|--------------|--------------|
| rs1540840                                          | G/C      |             | 14:99733384     |                     |                      |              |              |
|                                                    | --       |             | het_P:          |                     | 0.064                | het_I:       | 70.8         |
|                                                    | ngt      | info        | p_value         | f_ca(n)             | f_co(n)              | ln(OR)       | STDerr       |
| PGC_SCZ wave3 eur only                             | 0        | 0.86        | 2.21e-09        | 0.542(53386)        | 0.525(77258)         | 0.056        | 0.009        |
| PGC_SCZ wave3 asn only                             | 0        | 0.58        | 0.212           | 0.888(14004)        | 0.89(16757)          | 0.045        | 0.036        |
| PGC_SCZ wave2 only                                 | 0        | 0.85        | 5.57e-09        | 0.559(34850)        | 0.531(44347)         | 0.069        | 0.012        |
| PGC_SCZ wave3 (excl. wave2)                        | 0        | 0.78        | 0.00967         | 0.672(32540)        | 0.643(49668)         | 0.036        | 0.014        |
| <b>PGC_SCZ wave3 (incl. wave2)</b>                 | <b>0</b> | <b>0.81</b> | <b>1.04e-09</b> | <b>0.614(67390)</b> | <b>0.59(94015)</b>   | <b>0.055</b> | <b>0.009</b> |
| Decode - Replication                               | 0        | 0.99        | 0.732           | 0.547(1979)         | 0.537(142627)        | 0.036        | 0.037        |
| <b>PGC_SCZ wave3 (incl. wave2 and replication)</b> | <b>0</b> | <b>0.92</b> | <b>1.74e-09</b> | <b>0.612(69369)</b> | <b>0.558(236642)</b> | <b>0.053</b> | <b>0.009</b> |

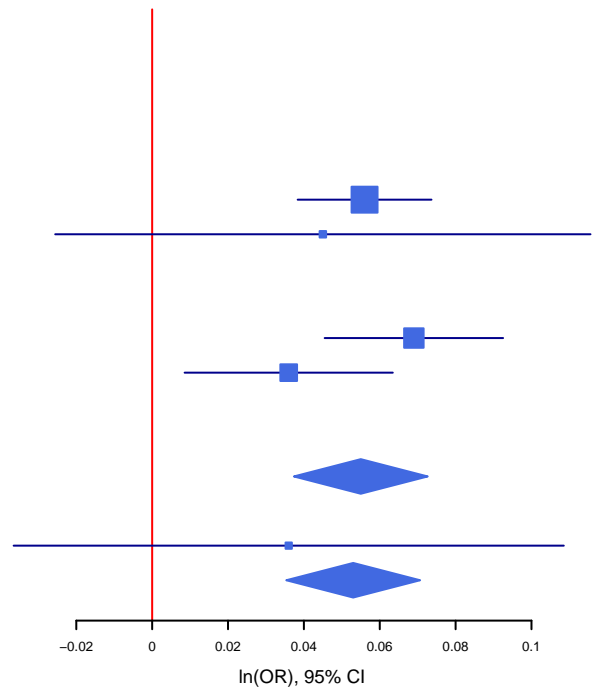

rs115325222

A/G

5:88854539

++

het\_P:

0.609

het\_I:

0.0

ngt info p\_value f\_ca(n) f\_co(n) ln(OR) STDerr

PGC\_SCZ wave3 eur only 0 0.82 6.48e-10 0.895(53386) 0.886(77258) 0.094 0.015

PGC\_SCZ wave3 asn only 0 0.26 0.533 0.97(14004) 0.973(16757) -0.06 0.096

PGC\_SCZ wave2 only 0 0.82 7.25e-07 0.9(34850) 0.891(44347) 0.097 0.02

PGC\_SCZ wave3 (excl. wave2) 0 0.63 0.000605 0.923(32540) 0.911(49668) 0.081 0.024

PGC\_SCZ wave3 (incl. wave2) 0 0.72 1.93e-09 0.911(67390) 0.901(94015) 0.09 0.015

Decode - Replication 0 1.00 0.376 0.892(1979) 0.853(142627) 0.081 0.059

PGC\_SCZ wave3 (incl. wave2 and replication) 0 0.89 1.75e-09 0.91(69369) 0.872(236642) 0.088 0.015

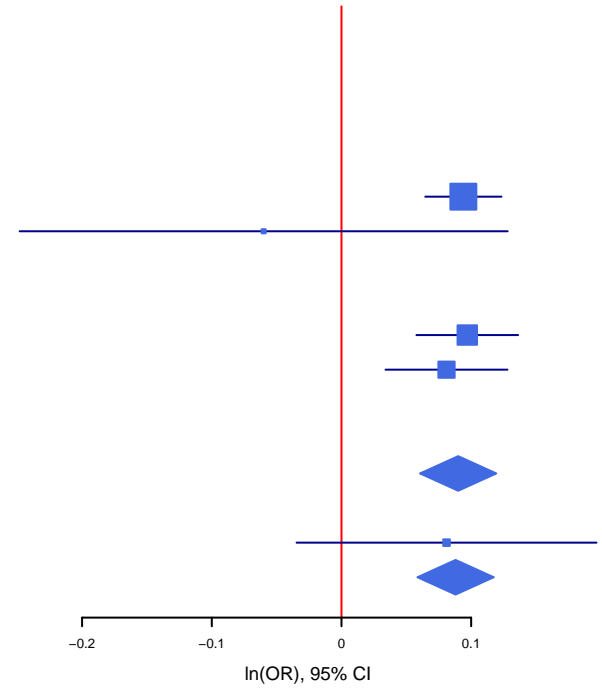

rs12138231                      T/A                      1:150115398

                                         ++                      het\_P:                      0.043                      het\_I:                      75.5

|                        | ngt | info | p_value  | f_ca(n)      | f_co(n)      | ln(OR) | STDerr |
|------------------------|-----|------|----------|--------------|--------------|--------|--------|
| PGC_SCZ wave3 eur only | 1   | 0.95 | 7.99e-09 | 0.171(53386) | 0.183(77258) | -0.067 | 0.012  |
| PGC_SCZ wave3 asn only | nan | nan  | nan      | nan(nan)     | nan(nan)     | nan    | nan    |

|                             |   |      |          |             |              |        |       |
|-----------------------------|---|------|----------|-------------|--------------|--------|-------|
| PGC_SCZ wave2 only          | 1 | 0.96 | 7.35e-09 | 0.17(32998) | 0.182(43387) | -0.086 | 0.015 |
| PGC_SCZ wave3 (excl. wave2) | 0 | 0.81 | 0.0428   | 0.14(26106) | 0.15(42542)  | -0.038 | 0.019 |

**PGC\_SCZ wave3 (incl. wave2)**                      **1**    **0.89**    **7.21e-09**    **0.157(59104)**    **0.166(85929)**    **-0.067**    **0.012**

Decode – Replication                      0    1.00    0.0926    0.169(1979)    0.18(142627)    -0.038    0.051

**PGC\_SCZ wave3 (incl. wave2 and replication)**                      **1**    **0.96**    **1.81e-09**    **0.157(61083)**    **0.175(228556)**    **-0.068**    **0.011**

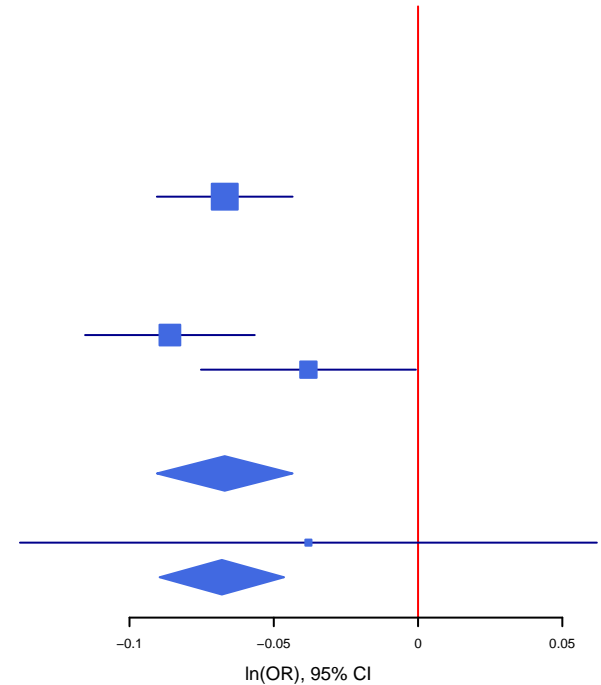

|     |            |       |        |     |
|-----|------------|-------|--------|-----|
| G/T | 1:97168334 |       |        |     |
| ++  | het P:     | 0.726 | het I: | 0.0 |

| rs4632195                                          | C/T       |             | 18:50746748     |                     |                      |               |              |
|----------------------------------------------------|-----------|-------------|-----------------|---------------------|----------------------|---------------|--------------|
|                                                    | ++        |             | het_P:          | 0.719               | het_I:               | 0.0           |              |
|                                                    | ngt       | info        | p_value         | f_ca(n)             | f_co(n)              | ln(OR)        | STDerr       |
| PGC_SCZ wave3 eur only                             | 25        | 1.00        | 4.59e-08        | 0.471(53386)        | 0.48(77258)          | -0.047        | 0.009        |
| PGC_SCZ wave3 asn only                             | 4         | 0.98        | 0.00837         | 0.928(14004)        | 0.935(16757)         | -0.09         | 0.034        |
| PGC_SCZ wave2 only                                 | 19        | 1.00        | 1.75e-05        | 0.492(34850)        | 0.488(44347)         | -0.047        | 0.011        |
| PGC_SCZ wave3 (excl. wave2)                        | 10        | 0.99        | 3.63e-05        | 0.645(32540)        | 0.626(49668)         | -0.053        | 0.013        |
| <b>PGC_SCZ wave3 (incl. wave2)</b>                 | <b>29</b> | <b>0.99</b> | <b>2.72e-09</b> | <b>0.566(67390)</b> | <b>0.561(94015)</b>  | <b>-0.05</b>  | <b>0.008</b> |
| Decode – Replication                               | 0         | 1.00        | 0.32            | 0.471(1979)         | 0.417(142627)        | -0.053        | 0.039        |
| <b>PGC_SCZ wave3 (incl. wave2 and replication)</b> | <b>29</b> | <b>1.00</b> | <b>1.92e-09</b> | <b>0.563(69369)</b> | <b>0.474(236642)</b> | <b>-0.049</b> | <b>0.008</b> |

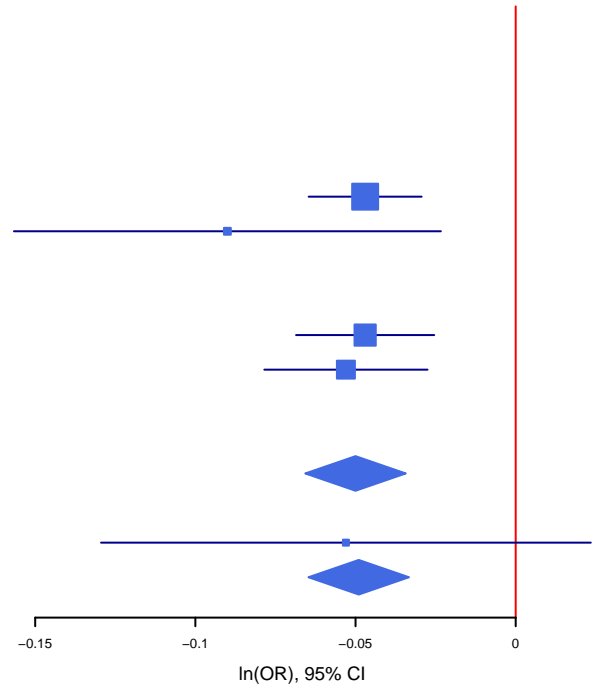



rs2381411

|     |                            |
|-----|----------------------------|
| T/C | 9:36319928                 |
| --- | het_P: 0.944    het_I: 0.0 |

|                                             | ngt | info | p_value  | f_ca(n)      | f_co(n)       | ln(OR) | STDerr |
|---------------------------------------------|-----|------|----------|--------------|---------------|--------|--------|
| PGC_SCZ wave3 eur only                      | 8   | 0.98 | 1.25e-08 | 0.586(53386) | 0.598(77258)  | -0.05  | 0.009  |
| PGC_SCZ wave3 asn only                      | 1   | 0.91 | 0.182    | 0.489(14004) | 0.497(16757)  | -0.024 | 0.018  |
| PGC_SCZ wave2 only                          | 2   | 0.98 | 4.17e-05 | 0.582(34850) | 0.595(44347)  | -0.046 | 0.011  |
| PGC_SCZ wave3 (excl. wave2)                 | 7   | 0.95 | 7.94e-05 | 0.548(32540) | 0.566(49668)  | -0.044 | 0.011  |
| PGC_SCZ wave3 (incl. wave2)                 | 9   | 0.96 | 1.28e-08 | 0.565(67390) | 0.58(94015)   | -0.045 | 0.008  |
| Decode - Replication                        | 0   | 1.00 | 0.0349   | 0.63(1979)   | 0.655(142627) | -0.044 | 0.039  |
| PGC_SCZ wave3 (incl. wave2 and replication) | 9   | 0.98 | 1.96e-09 | 0.567(69369) | 0.625(236642) | -0.047 | 0.008  |

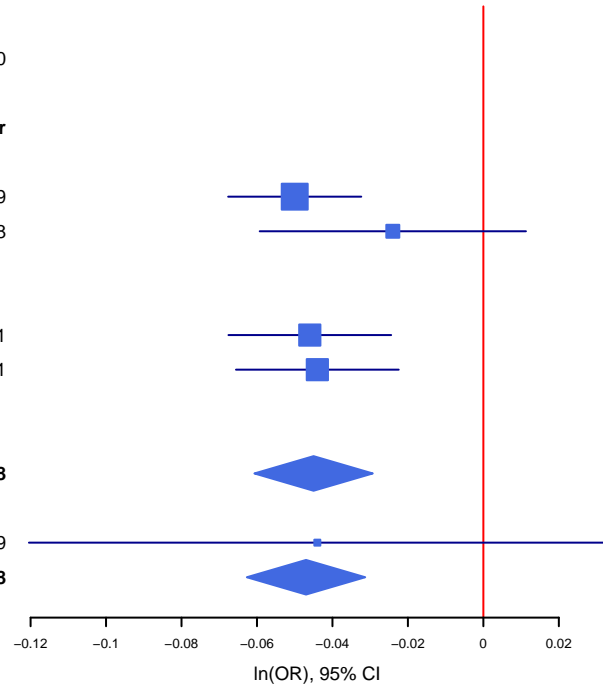

rs11136325

G/A

8:144870701

—

het\_P:

0.852

het\_I:

0.0

| ngt | info | p_value | f_ca(n) | f_co(n) | ln(OR) | STDerr |
|-----|------|---------|---------|---------|--------|--------|
|-----|------|---------|---------|---------|--------|--------|

PGC\_SCZ wave3 eur only

|   |      |          |              |              |       |       |
|---|------|----------|--------------|--------------|-------|-------|
| 8 | 0.93 | 3.05e-09 | 0.436(53386) | 0.421(77258) | 0.054 | 0.009 |
|---|------|----------|--------------|--------------|-------|-------|

PGC\_SCZ wave3 asn only

|   |      |       |              |             |       |       |
|---|------|-------|--------------|-------------|-------|-------|
| 0 | 0.43 | 0.679 | 0.918(13147) | 0.92(15808) | 0.022 | 0.054 |
|---|------|-------|--------------|-------------|-------|-------|

PGC\_SCZ wave2 only

|   |      |          |              |              |       |       |
|---|------|----------|--------------|--------------|-------|-------|
| 5 | 0.92 | 2.87e-06 | 0.464(34850) | 0.437(44347) | 0.054 | 0.012 |
|---|------|----------|--------------|--------------|-------|-------|

PGC\_SCZ wave3 (excl. wave2)

|   |      |         |              |              |       |       |
|---|------|---------|--------------|--------------|-------|-------|
| 3 | 0.78 | 0.00029 | 0.605(31683) | 0.569(48719) | 0.051 | 0.014 |
|---|------|---------|--------------|--------------|-------|-------|

PGC\_SCZ wave3 (incl. wave2)

|   |      |         |              |              |       |       |
|---|------|---------|--------------|--------------|-------|-------|
| 8 | 0.84 | 3.3e-09 | 0.531(66533) | 0.506(93066) | 0.053 | 0.009 |
|---|------|---------|--------------|--------------|-------|-------|

Decode – Replication

|   |      |       |             |               |       |       |
|---|------|-------|-------------|---------------|-------|-------|
| 0 | 1.00 | 0.247 | 0.455(1979) | 0.431(142627) | 0.051 | 0.039 |
|---|------|-------|-------------|---------------|-------|-------|

PGC\_SCZ wave3 (incl. wave2 and replication)

|   |      |          |              |              |       |       |
|---|------|----------|--------------|--------------|-------|-------|
| 8 | 0.94 | 1.99e-09 | 0.529(68512) | 0.46(235693) | 0.053 | 0.009 |
|---|------|----------|--------------|--------------|-------|-------|

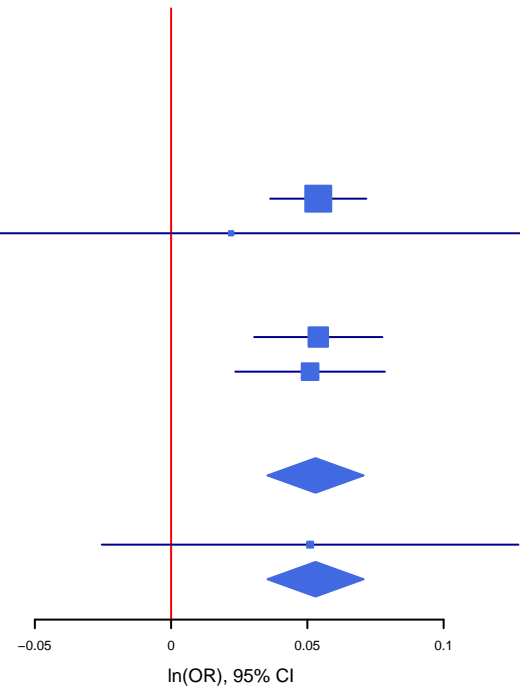

| rs3729986                                          | C/T       |             | 11:47371598     |                     |                      |               |              |
|----------------------------------------------------|-----------|-------------|-----------------|---------------------|----------------------|---------------|--------------|
|                                                    | ++        |             | het_P:          | 0.894               | het_I:               | 0.0           |              |
|                                                    | ngt       | info        | p_value         | f_ca(n)             | f_co(n)              | ln(OR)        | STDerr       |
| PGC_SCZ wave3 eur only                             | 11        | 0.96        | 2.18e-09        | 0.898(53386)        | 0.904(77258)         | -0.088        | 0.015        |
| PGC_SCZ wave3 asn only                             | nan       | nan         | nan             | nan(nan)            | nan(nan)             | nan           | nan          |
| PGC_SCZ wave2 only                                 | 3         | 0.95        | 2.18e-06        | 0.898(32998)        | 0.905(43387)         | -0.09         | 0.019        |
| PGC_SCZ wave3 (excl. wave2)                        | 8         | 0.96        | 0.000253        | 0.898(20388)        | 0.904(33871)         | -0.086        | 0.023        |
| <b>PGC_SCZ wave3 (incl. wave2)</b>                 | <b>11</b> | <b>0.96</b> | <b>2.18e-09</b> | <b>0.898(53386)</b> | <b>0.904(77258)</b>  | <b>-0.088</b> | <b>0.015</b> |
| Decode – Replication                               | 0         | 1.00        | 0.477           | 0.898(1979)         | 0.885(142627)        | -0.086        | 0.062        |
| <b>PGC_SCZ wave3 (incl. wave2 and replication)</b> | <b>11</b> | <b>0.98</b> | <b>2.03e-09</b> | <b>0.898(55365)</b> | <b>0.892(219885)</b> | <b>-0.086</b> | <b>0.014</b> |

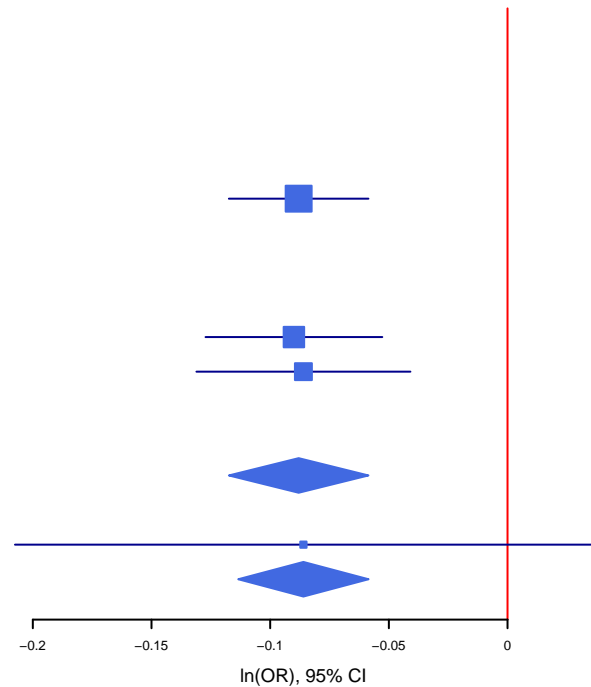

rs10148671

T/C

14:29469373

—

het\_P:

0.394

het\_I:

0.0

|  | ngt | info | p_value | f_ca(n) | f_co(n) | ln(OR) | STDerr |
|--|-----|------|---------|---------|---------|--------|--------|
|--|-----|------|---------|---------|---------|--------|--------|

PGC\_SCZ wave3 eur only

|    |      |          |              |              |        |       |
|----|------|----------|--------------|--------------|--------|-------|
| 84 | 1.00 | 2.85e-07 | 0.336(53386) | 0.348(77258) | -0.047 | 0.009 |
|----|------|----------|--------------|--------------|--------|-------|

PGC\_SCZ wave3 asn only

|    |      |        |              |              |        |      |
|----|------|--------|--------------|--------------|--------|------|
| 12 | 0.98 | 0.0067 | 0.735(14004) | 0.751(16757) | -0.054 | 0.02 |
|----|------|--------|--------------|--------------|--------|------|

PGC\_SCZ wave2 only

|    |      |          |              |              |        |       |
|----|------|----------|--------------|--------------|--------|-------|
| 47 | 1.00 | 0.000341 | 0.355(34850) | 0.353(44347) | -0.041 | 0.012 |
|----|------|----------|--------------|--------------|--------|-------|

PGC\_SCZ wave3 (excl. wave2)

|    |      |          |              |              |        |       |
|----|------|----------|--------------|--------------|--------|-------|
| 49 | 0.99 | 3.58e-06 | 0.487(32540) | 0.479(49668) | -0.055 | 0.012 |
|----|------|----------|--------------|--------------|--------|-------|

PGC\_SCZ wave3 (incl. wave2)

|    |      |          |              |             |        |       |
|----|------|----------|--------------|-------------|--------|-------|
| 96 | 0.99 | 6.82e-09 | 0.419(67390) | 0.42(94015) | -0.048 | 0.008 |
|----|------|----------|--------------|-------------|--------|-------|

Decode – Replication

|   |      |        |             |               |        |       |
|---|------|--------|-------------|---------------|--------|-------|
| 0 | 1.00 | 0.0929 | 0.359(1979) | 0.378(142627) | -0.055 | 0.039 |
|---|------|--------|-------------|---------------|--------|-------|

PGC\_SCZ wave3 (incl. wave2 and replication)

|    |      |          |              |               |        |       |
|----|------|----------|--------------|---------------|--------|-------|
| 96 | 1.00 | 2.05e-09 | 0.417(69369) | 0.395(236642) | -0.049 | 0.008 |
|----|------|----------|--------------|---------------|--------|-------|

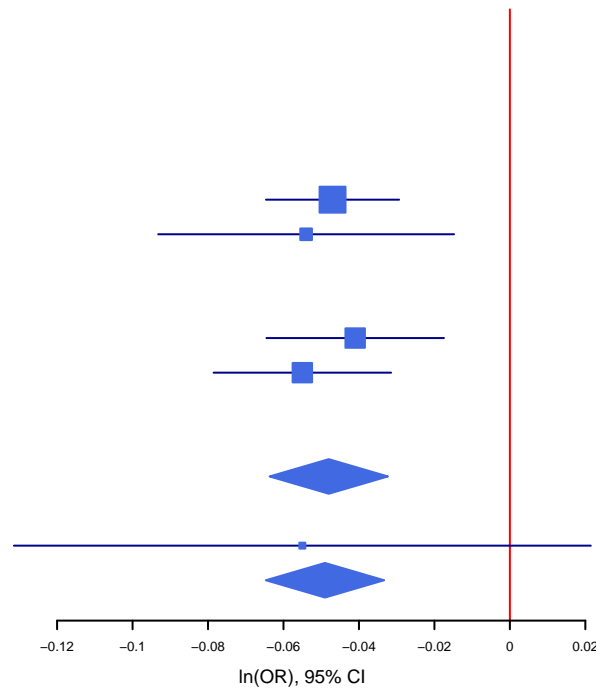

|                                                    |          |             |                 |                     |                      |              |              |
|----------------------------------------------------|----------|-------------|-----------------|---------------------|----------------------|--------------|--------------|
| rs252812                                           | A/G      |             | 5:106735490     |                     |                      |              |              |
|                                                    | ++       |             | het_P:          | 0.616               | het_I:               | 0.0          |              |
|                                                    | ngt      | info        | p_value         | f_ca(n)             | f_co(n)              | ln(OR)       | STDerr       |
| PGC_SCZ wave3 eur only                             | 0        | 1.00        | 5.39e-07        | 0.192(53386)        | 0.181(77258)         | 0.055        | 0.011        |
| PGC_SCZ wave3 asn only                             | 0        | 0.96        | 0.00669         | 0.471(14004)        | 0.47(16757)          | 0.047        | 0.018        |
| PGC_SCZ wave2 only                                 | 0        | 1.00        | 2.52e-05        | 0.204(34850)        | 0.185(44347)         | 0.058        | 0.014        |
| PGC_SCZ wave3 (excl. wave2)                        | 0        | 0.98        | 0.000118        | 0.298(32540)        | 0.275(49668)         | 0.049        | 0.013        |
| <b>PGC_SCZ wave3 (incl. wave2)</b>                 | <b>0</b> | <b>0.99</b> | <b>1.3e-08</b>  | <b>0.25(67390)</b>  | <b>0.232(94015)</b>  | <b>0.053</b> | <b>0.009</b> |
| Decode – Replication                               | 0        | 1.00        | 0.0382          | 0.188(1979)         | 0.159(142627)        | 0.049        | 0.048        |
| <b>PGC_SCZ wave3 (incl. wave2 and replication)</b> | <b>0</b> | <b>1.00</b> | <b>2.11e-09</b> | <b>0.248(69369)</b> | <b>0.188(236642)</b> | <b>0.055</b> | <b>0.009</b> |

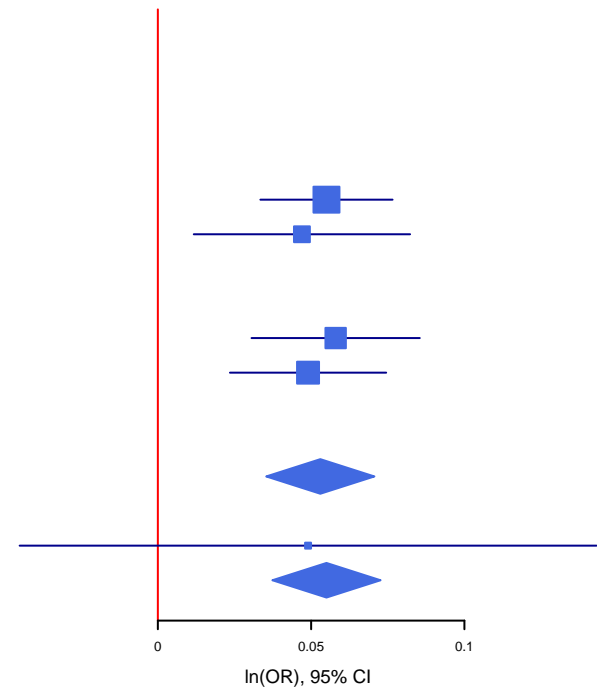

rs35734242

T/C

4:706700

—

het\_P:

0.105

het\_I:

61.9

| ngt | info | p_value | f_ca(n) | f_co(n) | ln(OR) | STDerr |
|-----|------|---------|---------|---------|--------|--------|
|-----|------|---------|---------|---------|--------|--------|

|                        |   |      |          |              |              |        |       |
|------------------------|---|------|----------|--------------|--------------|--------|-------|
| PGC_SCZ wave3 eur only | 1 | 0.95 | 1.37e-08 | 0.562(53386) | 0.574(77258) | -0.051 | 0.009 |
|------------------------|---|------|----------|--------------|--------------|--------|-------|

|                        |   |      |         |              |              |        |       |
|------------------------|---|------|---------|--------------|--------------|--------|-------|
| PGC_SCZ wave3 asn only | 0 | 0.92 | 0.00835 | 0.542(14004) | 0.556(16757) | -0.047 | 0.018 |
|------------------------|---|------|---------|--------------|--------------|--------|-------|

|                    |   |      |         |              |              |        |       |
|--------------------|---|------|---------|--------------|--------------|--------|-------|
| PGC_SCZ wave2 only | 1 | 0.92 | 0.00127 | 0.562(34850) | 0.571(44347) | -0.037 | 0.011 |
|--------------------|---|------|---------|--------------|--------------|--------|-------|

|                             |   |      |         |              |              |        |       |
|-----------------------------|---|------|---------|--------------|--------------|--------|-------|
| PGC_SCZ wave3 (excl. wave2) | 0 | 0.96 | 2.1e-08 | 0.553(32540) | 0.571(49668) | -0.063 | 0.011 |
|-----------------------------|---|------|---------|--------------|--------------|--------|-------|

|                                    |          |             |                 |                     |                     |              |              |
|------------------------------------|----------|-------------|-----------------|---------------------|---------------------|--------------|--------------|
| <b>PGC_SCZ wave3 (incl. wave2)</b> | <b>1</b> | <b>0.94</b> | <b>3.93e-10</b> | <b>0.558(67390)</b> | <b>0.571(94015)</b> | <b>-0.05</b> | <b>0.008</b> |
|------------------------------------|----------|-------------|-----------------|---------------------|---------------------|--------------|--------------|

|                      |   |      |       |             |               |        |       |
|----------------------|---|------|-------|-------------|---------------|--------|-------|
| Decode – Replication | 0 | 1.00 | 0.522 | 0.567(1979) | 0.562(142627) | -0.063 | 0.039 |
|----------------------|---|------|-------|-------------|---------------|--------|-------|

|                                                    |          |             |                 |                     |                      |               |              |
|----------------------------------------------------|----------|-------------|-----------------|---------------------|----------------------|---------------|--------------|
| <b>PGC_SCZ wave3 (incl. wave2 and replication)</b> | <b>1</b> | <b>0.98</b> | <b>2.23e-09</b> | <b>0.558(69369)</b> | <b>0.566(236642)</b> | <b>-0.047</b> | <b>0.008</b> |
|----------------------------------------------------|----------|-------------|-----------------|---------------------|----------------------|---------------|--------------|

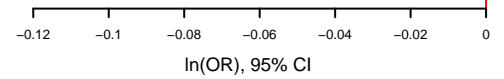

|                                                    |            |             |                 |                     |                      |               |               |
|----------------------------------------------------|------------|-------------|-----------------|---------------------|----------------------|---------------|---------------|
| <b>rs3810450</b>                                   |            | <b>T/C</b>  |                 | <b>19:36530562</b>  |                      |               |               |
|                                                    |            | ++          |                 | het_P:              | 0.218                | het_I:        | 34.0          |
|                                                    | <b>ngt</b> | <b>info</b> | <b>p_value</b>  | <b>f_ca(n)</b>      | <b>f_co(n)</b>       | <b>ln(OR)</b> | <b>STDerr</b> |
| PGC_SCZ wave3 eur only                             | 1          | 0.97        | 9.14e-05        | 0.967(52493)        | 0.963(75664)         | 0.095         | 0.024         |
| PGC_SCZ wave3 asn only                             | 1          | 0.94        | 2.3e-05         | 0.801(14004)        | 0.789(16757)         | 0.091         | 0.021         |
| PGC_SCZ wave2 only                                 | 0          | 0.95        | 0.0243          | 0.956(33957)        | 0.959(42753)         | 0.064         | 0.028         |
| PGC_SCZ wave3 (excl. wave2)                        | 2          | 0.97        | 5.17e-08        | 0.907(32540)        | 0.907(49668)         | 0.106         | 0.02          |
| <b>PGC_SCZ wave3 (incl. wave2)</b>                 | <b>2</b>   | <b>0.96</b> | <b>8.27e-09</b> | <b>0.932(66497)</b> | <b>0.931(92421)</b>  | <b>0.092</b>  | <b>0.016</b>  |
| Decode – Replication                               | 0          | 1.00        | 0.0762          | 0.968(1979)         | 0.957(142627)        | 0.106         | 0.11          |
| <b>PGC_SCZ wave3 (incl. wave2 and replication)</b> | <b>2</b>   | <b>0.98</b> | <b>2.29e-09</b> | <b>0.933(68476)</b> | <b>0.947(235048)</b> | <b>0.095</b>  | <b>0.016</b>  |

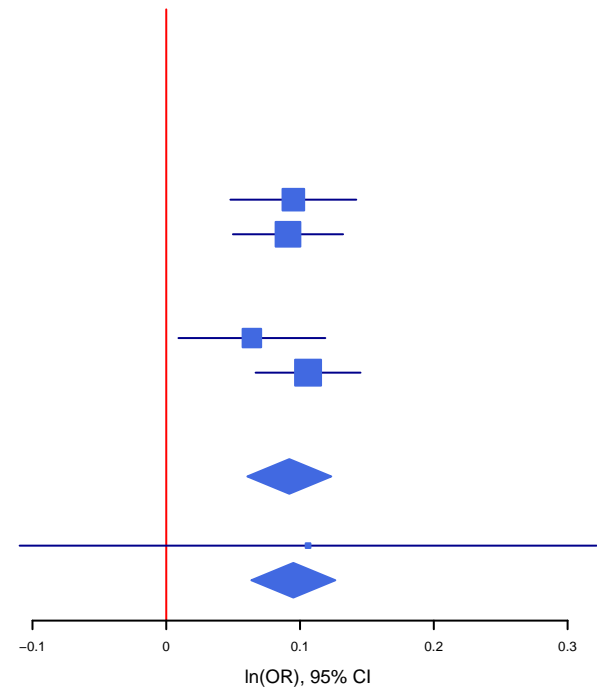

| rs10052736                                         | G/T      |             | 5:45890282      |                     |                      |               |              |
|----------------------------------------------------|----------|-------------|-----------------|---------------------|----------------------|---------------|--------------|
|                                                    | ++       |             | het_P:          | 0.236               | het_I:               | 28.9          |              |
|                                                    | ngt      | info        | p_value         | f_ca(n)             | f_co(n)              | ln(OR)        | STDerr       |
| PGC_SCZ wave3 eur only                             | 0        | 0.96        | 1.45e-06        | 0.694(53386)        | 0.703(77258)         | -0.046        | 0.01         |
| PGC_SCZ wave3 asn only                             | 0        | 0.97        | 0.000397        | 0.509(14004)        | 0.521(16757)         | -0.061        | 0.017        |
| PGC_SCZ wave2 only                                 | 0        | 0.96        | 0.00108         | 0.686(34850)        | 0.701(44347)         | -0.039        | 0.012        |
| PGC_SCZ wave3 (excl. wave2)                        | 0        | 0.97        | 3.59e-07        | 0.624(32540)        | 0.644(49668)         | -0.059        | 0.012        |
| <b>PGC_SCZ wave3 (incl. wave2)</b>                 | <b>0</b> | <b>0.97</b> | <b>3e-09</b>    | <b>0.656(67390)</b> | <b>0.671(94015)</b>  | <b>-0.05</b>  | <b>0.008</b> |
| Decode – Replication                               | 0        | 1.00        | 0.352           | 0.726(1979)         | 0.715(142627)        | -0.059        | 0.041        |
| <b>PGC_SCZ wave3 (incl. wave2 and replication)</b> | <b>0</b> | <b>0.99</b> | <b>2.36e-09</b> | <b>0.658(69369)</b> | <b>0.698(236642)</b> | <b>-0.049</b> | <b>0.008</b> |

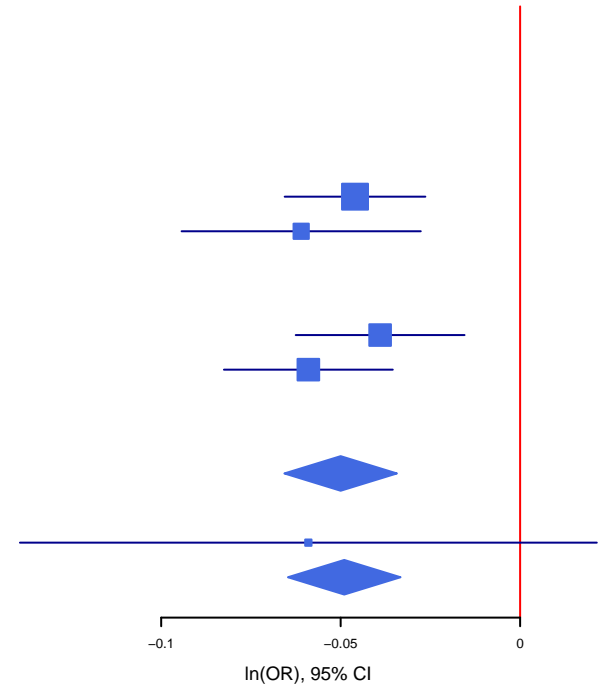



|                                                    |           |             |                 |                     |                     |               |              |
|----------------------------------------------------|-----------|-------------|-----------------|---------------------|---------------------|---------------|--------------|
| rs3764002                                          | C/T       |             | 12:108618630    |                     |                     |               |              |
|                                                    | ++        |             | het_P:          |                     | 0.485               | het_I:        | 0.0          |
|                                                    | ngt       | info        | p_value         | f_ca(n)             | f_co(n)             | ln(OR)        | STDerr       |
| PGC_SCZ wave3 eur only                             | 67        | 0.98        | 3.33e-05        | 0.724(53386)        | 0.735(77258)        | -0.041        | 0.01         |
| PGC_SCZ wave3 asn only                             | 8         | 0.92        | 6.61e-07        | 0.455(14004)        | 0.47(16757)         | -0.089        | 0.018        |
| PGC_SCZ wave2 only                                 | 30        | 0.97        | 0.000197        | 0.706(34850)        | 0.723(44347)        | -0.046        | 0.012        |
| PGC_SCZ wave3 (excl. wave2)                        | 45        | 0.97        | 1.64e-06        | 0.628(32540)        | 0.657(49668)        | -0.058        | 0.012        |
| <b>PGC_SCZ wave3 (incl. wave2)</b>                 | <b>75</b> | <b>0.97</b> | <b>1.65e-09</b> | <b>0.668(67390)</b> | <b>0.688(94015)</b> | <b>-0.052</b> | <b>0.009</b> |
| Decode – Replication                               | 0         | 1.00        | 0.729           | 0.724(1979)         | 0.758(142627)       | -0.058        | 0.043        |
| <b>PGC_SCZ wave3 (incl. wave2 and replication)</b> | <b>75</b> | <b>0.99</b> | <b>2.48e-09</b> | <b>0.67(69369)</b>  | <b>0.73(236642)</b> | <b>-0.05</b>  | <b>0.008</b> |

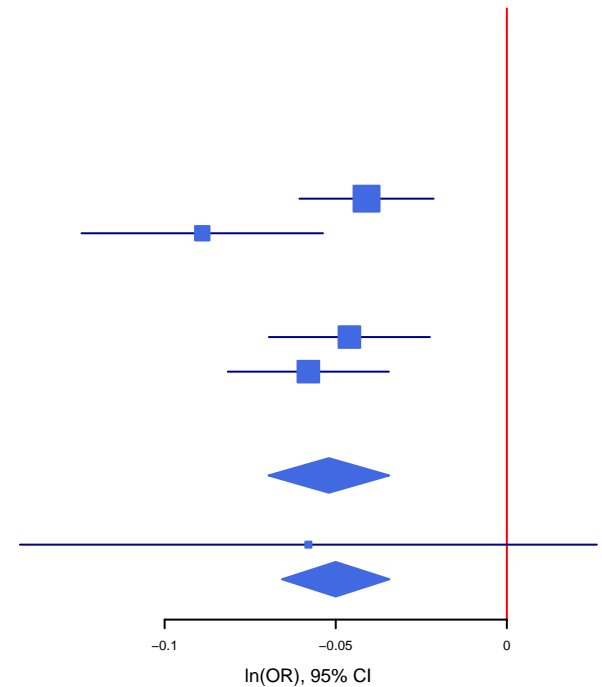

| rs12712510                                         | T/C      |             | 2:22749726      |                     |                      |              |              |
|----------------------------------------------------|----------|-------------|-----------------|---------------------|----------------------|--------------|--------------|
|                                                    | ++       |             | het_P:          | 0.129               | het_I:               | 56.5         |              |
|                                                    | ngt      | info        | p_value         | f_ca(n)             | f_co(n)              | ln(OR)       | STDerr       |
| PGC_SCZ wave3 eur only                             | 0        | 0.97        | 5.14e-11        | 0.488(53386)        | 0.473(77258)         | 0.057        | 0.009        |
| PGC_SCZ wave3 asn only                             | 0        | 0.91        | 0.475           | 0.894(14004)        | 0.902(16757)         | -0.022       | 0.031        |
| PGC_SCZ wave2 only                                 | 0        | 0.97        | 1.97e-08        | 0.508(34850)        | 0.48(44347)          | 0.062        | 0.011        |
| PGC_SCZ wave3 (excl. wave2)                        | 0        | 0.94        | 0.00413         | 0.64(32540)         | 0.611(49668)         | 0.037        | 0.013        |
| <b>PGC_SCZ wave3 (incl. wave2)</b>                 | <b>0</b> | <b>0.96</b> | <b>9.34e-10</b> | <b>0.572(67390)</b> | <b>0.549(94015)</b>  | <b>0.052</b> | <b>0.008</b> |
| Decode – Replication                               | 0        | 1.00        | 0.86            | 0.477(1979)         | 0.433(142627)        | 0.037        | 0.04         |
| <b>PGC_SCZ wave3 (incl. wave2 and replication)</b> | <b>0</b> | <b>0.98</b> | <b>2.49e-09</b> | <b>0.569(69369)</b> | <b>0.479(236642)</b> | <b>0.049</b> | <b>0.008</b> |

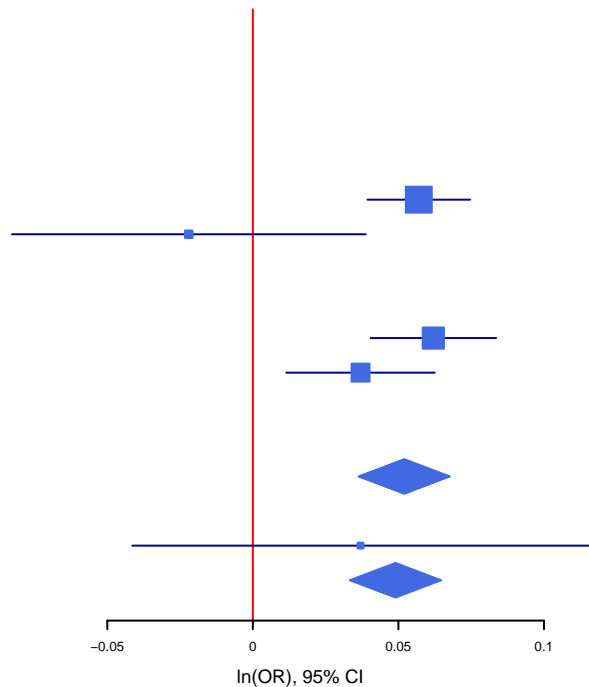

rs322128

C/T

19:11402416

++

het\_P:

0.962

het\_I:

0.0

ngt info p\_value f\_ca(n) f\_co(n) ln(OR) STDerr

PGC\_SCZ wave3 eur only

0 0.98 2.7e-07 0.788(53386) 0.796(77258) -0.055 0.011

PGC\_SCZ wave3 asn only

0 0.94 0.00201 0.743(14004) 0.756(16757) -0.063 0.02

PGC\_SCZ wave2 only

0 0.97 2.19e-05 0.784(34850) 0.793(44347) -0.057 0.014

PGC\_SCZ wave3 (excl. wave2)

0 0.97 2.35e-05 0.774(32540) 0.786(49668) -0.056 0.013

PGC\_SCZ wave3 (incl. wave2)

0 0.97 2.08e-09 0.779(67390) 0.789(94015) -0.057 0.01

Decode - Replication

0 1.00 0.594 0.789(1979) 0.805(142627) -0.056 0.047

PGC\_SCZ wave3 (incl. wave2 and replication)

0 0.99 2.61e-09 0.779(69369) 0.799(236642) -0.055 0.009

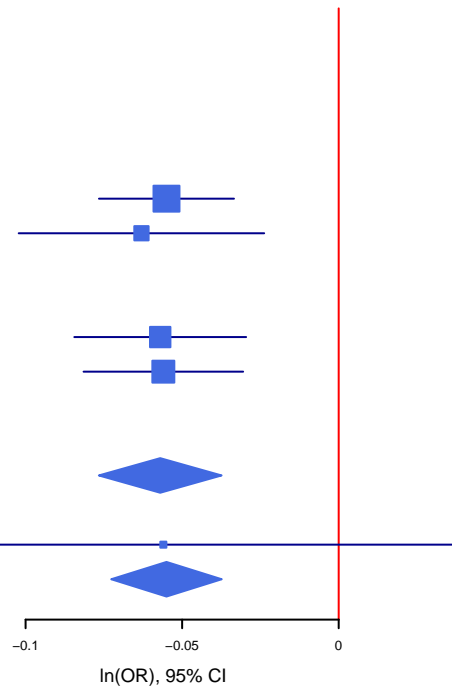

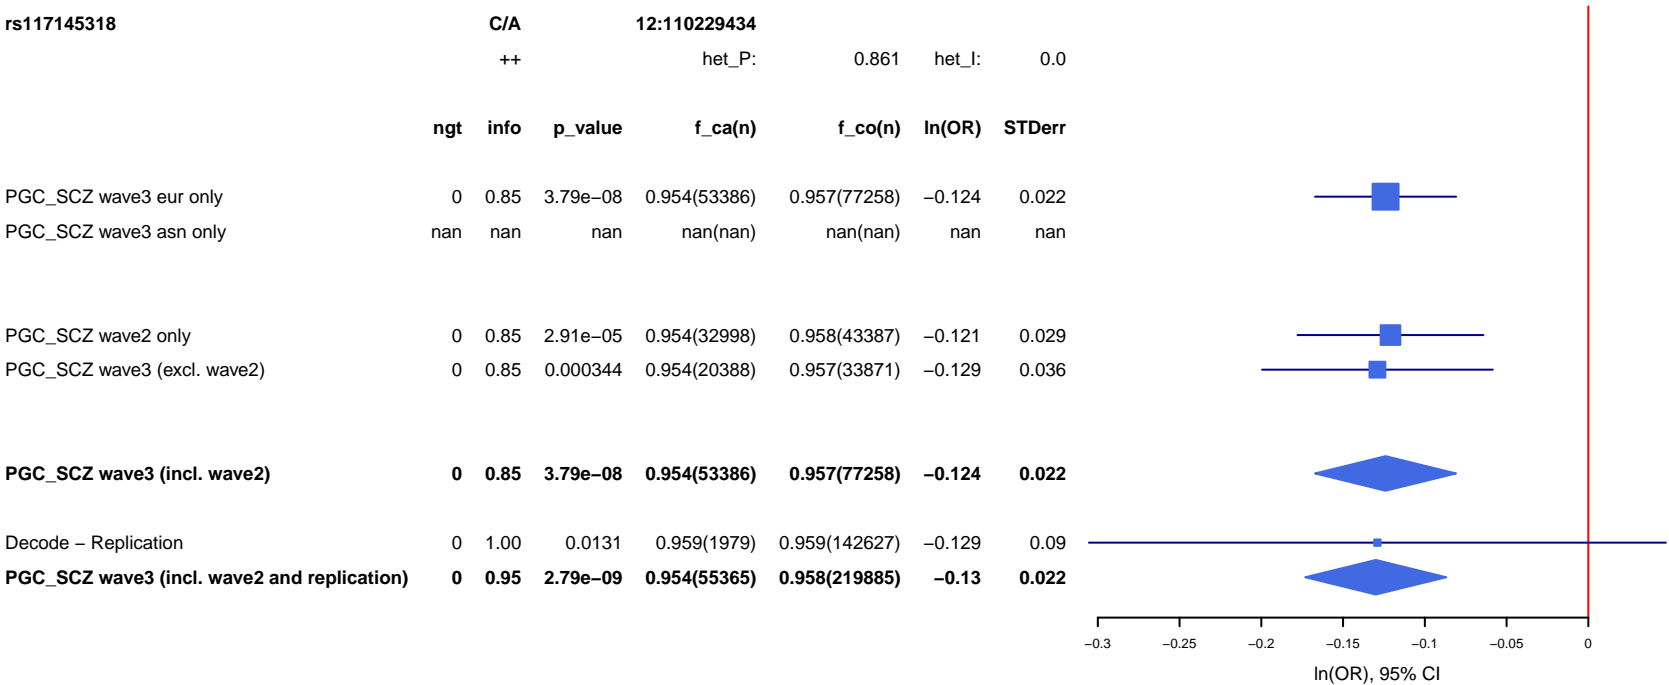

rs10243922

G/A

7:138599980

++

het\_P:

0.07

het\_I:

69.6

| ngt | info | p_value | f_ca(n) | f_co(n) | ln(OR) | STDerr |
|-----|------|---------|---------|---------|--------|--------|
|-----|------|---------|---------|---------|--------|--------|

PGC\_SCZ wave3 eur only

|   |      |          |              |              |       |       |
|---|------|----------|--------------|--------------|-------|-------|
| 2 | 0.99 | 1.03e-07 | 0.682(53386) | 0.691(77258) | -0.05 | 0.009 |
|---|------|----------|--------------|--------------|-------|-------|

PGC\_SCZ wave3 asn only

|   |      |        |              |              |        |       |
|---|------|--------|--------------|--------------|--------|-------|
| 1 | 0.95 | 0.0309 | 0.894(14004) | 0.903(16757) | -0.062 | 0.029 |
|---|------|--------|--------------|--------------|--------|-------|

PGC\_SCZ wave2 only

|   |      |         |              |              |        |       |
|---|------|---------|--------------|--------------|--------|-------|
| 2 | 0.99 | 0.00212 | 0.696(34850) | 0.696(44347) | -0.036 | 0.012 |
|---|------|---------|--------------|--------------|--------|-------|

PGC\_SCZ wave3 (excl. wave2)

|   |      |         |              |              |        |       |
|---|------|---------|--------------|--------------|--------|-------|
| 1 | 0.97 | 2.4e-07 | 0.759(32540) | 0.758(49668) | -0.069 | 0.013 |
|---|------|---------|--------------|--------------|--------|-------|

PGC\_SCZ wave3 (incl. wave2)

|   |      |          |              |              |        |       |
|---|------|----------|--------------|--------------|--------|-------|
| 3 | 0.98 | 1.02e-08 | 0.726(67390) | 0.729(94015) | -0.051 | 0.009 |
|---|------|----------|--------------|--------------|--------|-------|

Decode - Replication

|   |      |       |             |               |        |       |
|---|------|-------|-------------|---------------|--------|-------|
| 0 | 1.00 | 0.102 | 0.691(1979) | 0.711(142627) | -0.069 | 0.041 |
|---|------|-------|-------------|---------------|--------|-------|

PGC\_SCZ wave3 (incl. wave2 and replication)

|   |      |          |              |               |        |       |
|---|------|----------|--------------|---------------|--------|-------|
| 3 | 0.99 | 3.13e-09 | 0.725(69369) | 0.718(236642) | -0.052 | 0.009 |
|---|------|----------|--------------|---------------|--------|-------|

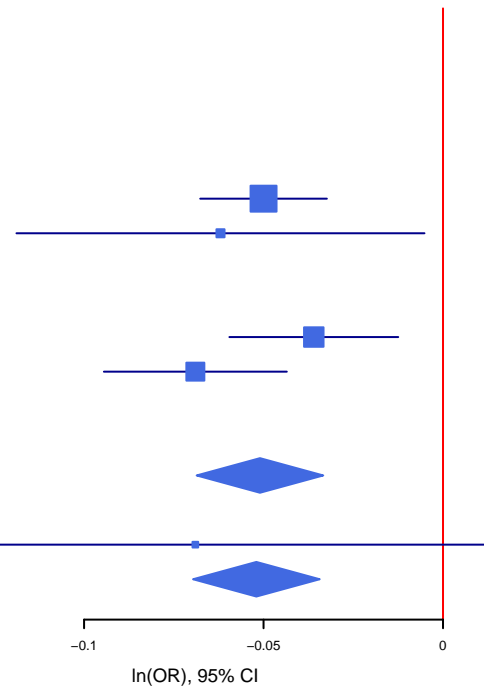

| rs9569820                                          | G/T      |             | 13:58702746     |                     |                      |               |              |
|----------------------------------------------------|----------|-------------|-----------------|---------------------|----------------------|---------------|--------------|
|                                                    | ++       |             | het_P:          | 0.796               | het_I:               | 0.0           |              |
|                                                    | ngt      | info        | p_value         | f_ca(n)             | f_co(n)              | ln(OR)        | STDerr       |
| PGC_SCZ wave3 eur only                             | 0        | 0.96        | 9.45e-07        | 0.876(53386)        | 0.881(77258)         | -0.066        | 0.013        |
| PGC_SCZ wave3 asn only                             | 0        | 0.91        | 0.000167        | 0.66(14004)         | 0.67(16757)          | -0.071        | 0.019        |
| PGC_SCZ wave2 only                                 | 0        | 0.98        | 8.63e-05        | 0.863(34850)        | 0.875(44347)         | -0.064        | 0.016        |
| PGC_SCZ wave3 (excl. wave2)                        | 0        | 0.93        | 1.8e-06         | 0.797(32540)        | 0.814(49668)         | -0.07         | 0.015        |
| <b>PGC_SCZ wave3 (incl. wave2)</b>                 | <b>0</b> | <b>0.95</b> | <b>6.56e-10</b> | <b>0.831(67390)</b> | <b>0.843(94015)</b>  | <b>-0.068</b> | <b>0.011</b> |
| Decode – Replication                               | 0        | 1.00        | 0.352           | 0.882(1979)         | 0.872(142627)        | -0.07         | 0.058        |
| <b>PGC_SCZ wave3 (incl. wave2 and replication)</b> | <b>0</b> | <b>0.98</b> | <b>3.16e-09</b> | <b>0.832(69369)</b> | <b>0.861(236642)</b> | <b>-0.064</b> | <b>0.011</b> |

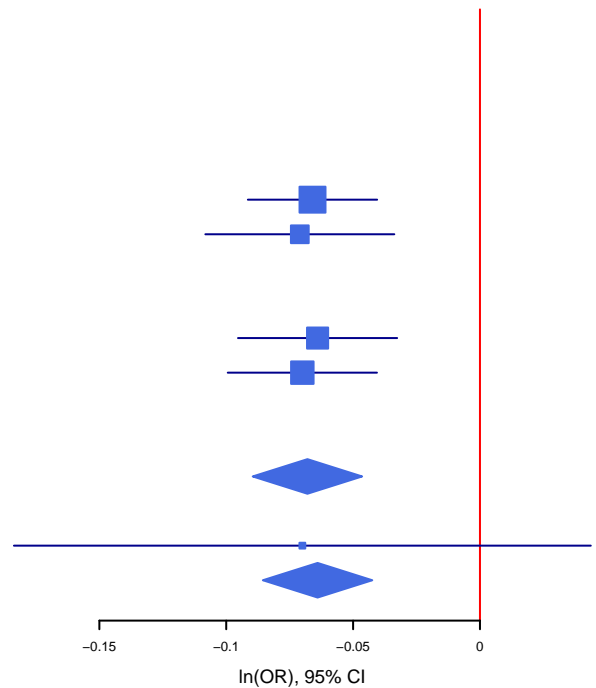

rs10985811

T/C

9:101070487

—

het\_P:

0.512

het\_I:

0.0

|  | ngt | info | p_value | f_ca(n) | f_co(n) | ln(OR) | STDerr |
|--|-----|------|---------|---------|---------|--------|--------|
|--|-----|------|---------|---------|---------|--------|--------|

PGC\_SCZ wave3 eur only

|    |      |          |              |              |        |       |
|----|------|----------|--------------|--------------|--------|-------|
| 23 | 1.00 | 3.61e-08 | 0.832(53386) | 0.842(77258) | -0.064 | 0.012 |
|----|------|----------|--------------|--------------|--------|-------|

PGC\_SCZ wave3 asn only

|   |      |       |              |              |        |       |
|---|------|-------|--------------|--------------|--------|-------|
| 4 | 0.94 | 0.082 | 0.622(14004) | 0.625(16757) | -0.031 | 0.018 |
|---|------|-------|--------------|--------------|--------|-------|

PGC\_SCZ wave2 only

|    |      |          |              |              |        |       |
|----|------|----------|--------------|--------------|--------|-------|
| 17 | 1.00 | 2.71e-05 | 0.827(34850) | 0.843(44347) | -0.062 | 0.015 |
|----|------|----------|--------------|--------------|--------|-------|

PGC\_SCZ wave3 (excl. wave2)

|    |      |          |              |              |        |       |
|----|------|----------|--------------|--------------|--------|-------|
| 10 | 0.98 | 0.000197 | 0.748(32540) | 0.768(49668) | -0.049 | 0.013 |
|----|------|----------|--------------|--------------|--------|-------|

PGC\_SCZ wave3 (incl. wave2)

|    |      |          |              |              |        |      |
|----|------|----------|--------------|--------------|--------|------|
| 27 | 0.99 | 2.53e-08 | 0.789(67390) | 0.803(94015) | -0.054 | 0.01 |
|----|------|----------|--------------|--------------|--------|------|

Decode – Replication

|   |      |       |             |               |        |       |
|---|------|-------|-------------|---------------|--------|-------|
| 0 | 1.00 | 0.014 | 0.848(1979) | 0.841(142627) | -0.049 | 0.052 |
|---|------|-------|-------------|---------------|--------|-------|

PGC\_SCZ wave3 (incl. wave2 and replication)

|    |      |          |              |               |        |      |
|----|------|----------|--------------|---------------|--------|------|
| 27 | 1.00 | 3.18e-09 | 0.791(69369) | 0.826(236642) | -0.057 | 0.01 |
|----|------|----------|--------------|---------------|--------|------|

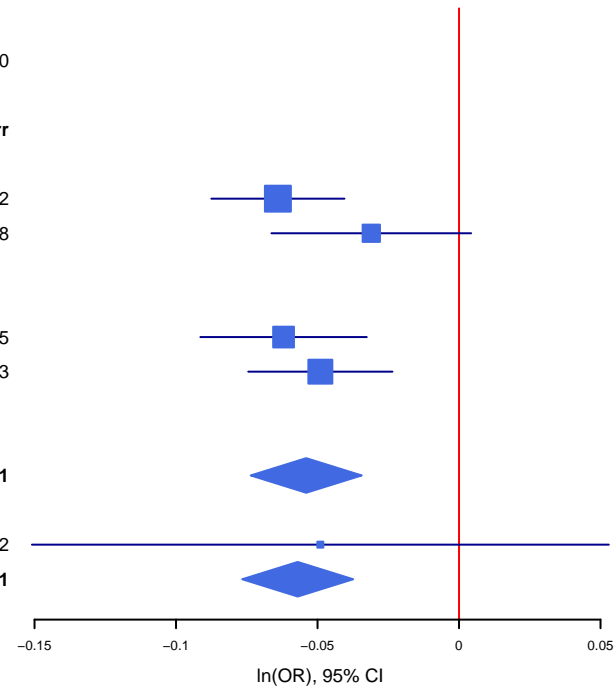

rs11715134

G/A

3:50552866

++

het\_P:

0.218

het\_I:

34.2

|  | ngt | info | p_value | f_ca(n) | f_co(n) | ln(OR) | STDerr |
|--|-----|------|---------|---------|---------|--------|--------|
|--|-----|------|---------|---------|---------|--------|--------|

PGC\_SCZ wave3 eur only

|   |      |          |              |             |        |       |
|---|------|----------|--------------|-------------|--------|-------|
| 0 | 0.94 | 0.000566 | 0.906(53386) | 0.91(77258) | -0.053 | 0.015 |
|---|------|----------|--------------|-------------|--------|-------|

PGC\_SCZ wave3 asn only

|   |      |          |              |              |        |       |
|---|------|----------|--------------|--------------|--------|-------|
| 0 | 0.95 | 2.36e-06 | 0.768(14004) | 0.775(16757) | -0.098 | 0.021 |
|---|------|----------|--------------|--------------|--------|-------|

PGC\_SCZ wave2 only

|   |      |         |              |              |        |       |
|---|------|---------|--------------|--------------|--------|-------|
| 0 | 0.93 | 0.00797 | 0.901(34850) | 0.908(44347) | -0.051 | 0.019 |
|---|------|---------|--------------|--------------|--------|-------|

PGC\_SCZ wave3 (excl. wave2)

|   |      |          |              |              |        |       |
|---|------|----------|--------------|--------------|--------|-------|
| 0 | 0.95 | 4.36e-07 | 0.851(32540) | 0.866(49668) | -0.082 | 0.016 |
|---|------|----------|--------------|--------------|--------|-------|

**PGC\_SCZ wave3 (incl. wave2)**

|          |             |                 |                     |                     |               |              |
|----------|-------------|-----------------|---------------------|---------------------|---------------|--------------|
| <b>0</b> | <b>0.94</b> | <b>2.52e-08</b> | <b>0.877(67390)</b> | <b>0.886(94015)</b> | <b>-0.069</b> | <b>0.012</b> |
|----------|-------------|-----------------|---------------------|---------------------|---------------|--------------|

Decode - Replication

|   |      |        |             |               |        |       |
|---|------|--------|-------------|---------------|--------|-------|
| 0 | 1.00 | 0.0222 | 0.911(1979) | 0.906(142627) | -0.082 | 0.065 |
|---|------|--------|-------------|---------------|--------|-------|

**PGC\_SCZ wave3 (incl. wave2 and replication)**

|          |             |                 |                     |                      |               |              |
|----------|-------------|-----------------|---------------------|----------------------|---------------|--------------|
| <b>0</b> | <b>0.98</b> | <b>3.36e-09</b> | <b>0.878(69369)</b> | <b>0.898(236642)</b> | <b>-0.071</b> | <b>0.012</b> |
|----------|-------------|-----------------|---------------------|----------------------|---------------|--------------|

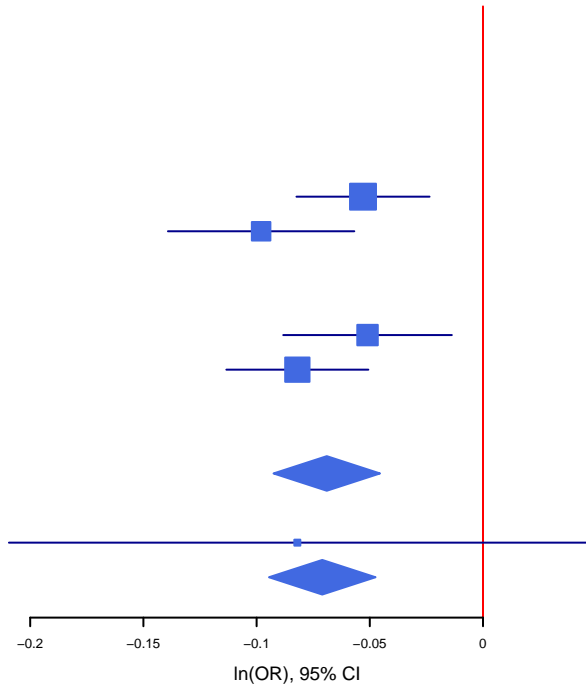



| <b>rs2686386</b>                                   | <b>C/T</b> |             | <b>12:121639657</b> |                     |                      |              |              |
|----------------------------------------------------|------------|-------------|---------------------|---------------------|----------------------|--------------|--------------|
|                                                    | --         |             | het_P:              | 0.641               | het_I:               | 0.0          |              |
|                                                    | ngt        | info        | p_value             | f_ca(n)             | f_co(n)              | ln(OR)       | STDerr       |
| PGC_SCZ wave3 eur only                             | 32         | 0.97        | 8.26e-06            | 0.198(53386)        | 0.189(77258)         | 0.049        | 0.011        |
| PGC_SCZ wave3 asn only                             | 5          | 0.92        | 0.000221            | 0.275(14004)        | 0.262(16757)         | 0.073        | 0.02         |
| PGC_SCZ wave2 only                                 | 5          | 0.96        | 0.000335            | 0.199(34850)        | 0.187(44347)         | 0.05         | 0.014        |
| PGC_SCZ wave3 (excl. wave2)                        | 32         | 0.97        | 8.87e-06            | 0.231(32540)        | 0.215(49668)         | 0.059        | 0.013        |
| <b>PGC_SCZ wave3 (incl. wave2)</b>                 | <b>37</b>  | <b>0.96</b> | <b>1.26e-08</b>     | <b>0.214(67390)</b> | <b>0.202(94015)</b>  | <b>0.055</b> | <b>0.01</b>  |
| Decode - Replication                               | 0          | 1.00        | 0.109               | 0.188(1979)         | 0.177(142627)        | 0.059        | 0.048        |
| <b>PGC_SCZ wave3 (incl. wave2 and replication)</b> | <b>37</b>  | <b>0.98</b> | <b>3.39e-09</b>     | <b>0.213(69369)</b> | <b>0.187(236642)</b> | <b>0.056</b> | <b>0.009</b> |

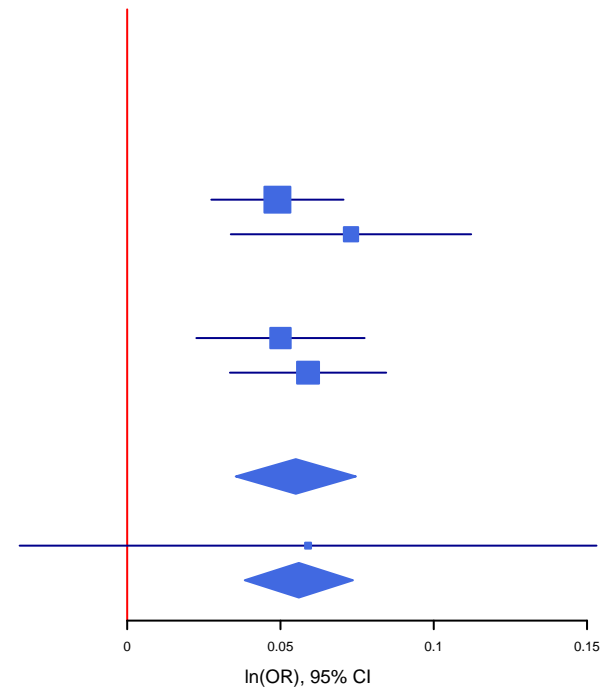

|                                                    |          |             |                 |                     |                      |              |              |
|----------------------------------------------------|----------|-------------|-----------------|---------------------|----------------------|--------------|--------------|
| rs1589726                                          | C/T      |             | 7:79348201      |                     |                      |              |              |
|                                                    | --       |             | het_P:          |                     | 0.168                | het_I:       | 47.3         |
|                                                    | ngt      | info        | p_value         | f_ca(n)             | f_co(n)              | ln(OR)       | STDerr       |
| PGC_SCZ wave3 eur only                             | 0        | 0.99        | 1.07e-07        | 0.092(53386)        | 0.086(77258)         | 0.081        | 0.015        |
| PGC_SCZ wave3 asn only                             | 0        | 0.91        | 0.0356          | 0.088(14004)        | 0.085(16757)         | 0.066        | 0.032        |
| PGC_SCZ wave2 only                                 | 0        | 0.99        | 0.0022          | 0.089(34850)        | 0.085(44347)         | 0.059        | 0.019        |
| PGC_SCZ wave3 (excl. wave2)                        | 0        | 0.97        | 5.67e-07        | 0.094(32540)        | 0.086(49668)         | 0.097        | 0.019        |
| <b>PGC_SCZ wave3 (incl. wave2)</b>                 | <b>0</b> | <b>0.98</b> | <b>1.2e-08</b>  | <b>0.092(67390)</b> | <b>0.085(94015)</b>  | <b>0.078</b> | <b>0.014</b> |
| Decode – Replication                               | 0        | 1.00        | 0.0926          | 0.087(1979)         | 0.088(142627)        | 0.097        | 0.066        |
| <b>PGC_SCZ wave3 (incl. wave2 and replication)</b> | <b>0</b> | <b>0.99</b> | <b>3.45e-09</b> | <b>0.091(69369)</b> | <b>0.087(236642)</b> | <b>0.079</b> | <b>0.013</b> |

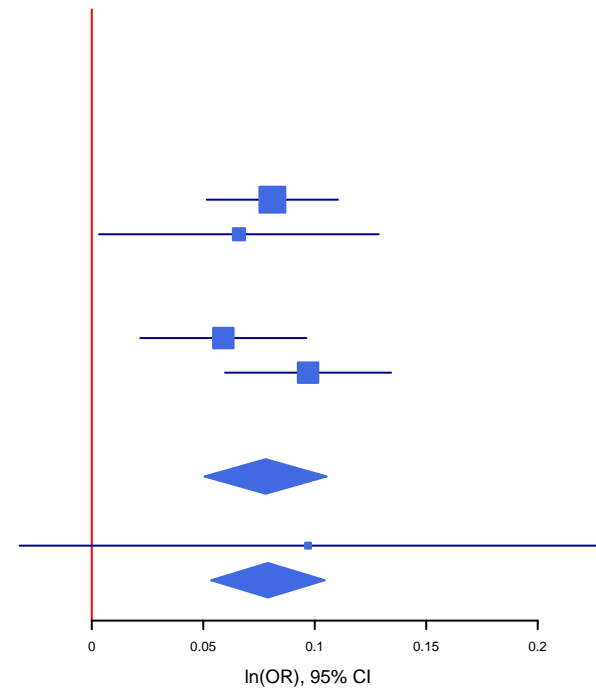

| rs10861176                                         | G/A      |             | 12:104631552    |                     |                      |              |              |
|----------------------------------------------------|----------|-------------|-----------------|---------------------|----------------------|--------------|--------------|
|                                                    | ++       |             | het_P:          |                     | 0.867                | het_I:       | 0.0          |
|                                                    | ngt      | info        | p_value         | f_ca(n)             | f_co(n)              | ln(OR)       | STDerr       |
| PGC_SCZ wave3 eur only                             | 0        | 0.99        | 1.59e-08        | 0.257(53386)        | 0.263(77258)         | -0.056       | 0.01         |
| PGC_SCZ wave3 asn only                             | 0        | 0.99        | 0.0677          | 0.324(14004)        | 0.326(16757)         | -0.033       | 0.018        |
| PGC_SCZ wave2 only                                 | 0        | 0.99        | 7.61e-05        | 0.259(34850)        | 0.262(44347)         | -0.049       | 0.012        |
| PGC_SCZ wave3 (excl. wave2)                        | 0        | 0.99        | 1.72e-05        | 0.284(32540)        | 0.285(49668)         | -0.052       | 0.012        |
| <b>PGC_SCZ wave3 (incl. wave2)</b>                 | <b>0</b> | <b>0.99</b> | <b>5.23e-09</b> | <b>0.271(67390)</b> | <b>0.274(94015)</b>  | <b>-0.05</b> | <b>0.009</b> |
| Decode – Replication                               | 0        | 1.00        | 0.412           | 0.252(1979)         | 0.242(142627)        | -0.052       | 0.044        |
| <b>PGC_SCZ wave3 (incl. wave2 and replication)</b> | <b>0</b> | <b>1.00</b> | <b>3.45e-09</b> | <b>0.27(69369)</b>  | <b>0.255(236642)</b> | <b>-0.05</b> | <b>0.008</b> |

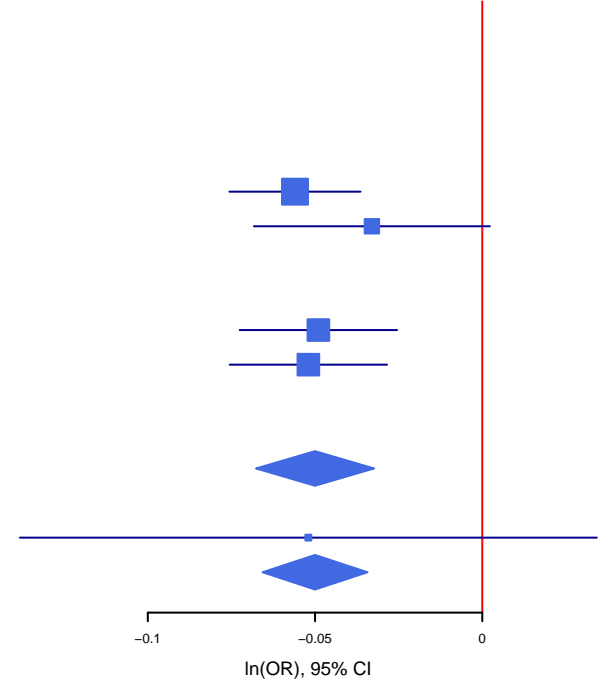

| <b>rs28454198</b>                                  |          |             | <b>G/C</b>      |                     | <b>4:80204001</b>    |              |              |
|----------------------------------------------------|----------|-------------|-----------------|---------------------|----------------------|--------------|--------------|
|                                                    |          |             | --              |                     | het_P:               | 0.414        | het_I: 0.0   |
|                                                    | ngt      | info        | p_value         | f_ca(n)             | f_co(n)              | ln(OR)       | STDerr       |
| PGC_SCZ wave3 eur only                             | 0        | 1.00        | 1.51e-07        | 0.504(53386)        | 0.492(77258)         | 0.045        | 0.009        |
| PGC_SCZ wave3 asn only                             | 0        | 0.92        | 0.00174         | 0.819(14004)        | 0.814(16757)         | 0.074        | 0.024        |
| PGC_SCZ wave2 only                                 | 0        | 1.00        | 9.11e-05        | 0.524(34850)        | 0.506(44347)         | 0.043        | 0.011        |
| PGC_SCZ wave3 (excl. wave2)                        | 0        | 0.97        | 3.62e-06        | 0.618(32540)        | 0.589(49668)         | 0.056        | 0.012        |
| <b>PGC_SCZ wave3 (incl. wave2)</b>                 | <b>0</b> | <b>0.98</b> | <b>1.87e-09</b> | <b>0.569(67390)</b> | <b>0.549(94015)</b>  | <b>0.049</b> | <b>0.008</b> |
| Decode – Replication                               | 0        | 1.00        | 0.878           | 0.502(1979)         | 0.516(142627)        | 0.056        | 0.038        |
| <b>PGC_SCZ wave3 (incl. wave2 and replication)</b> | <b>0</b> | <b>0.99</b> | <b>3.67e-09</b> | <b>0.567(69369)</b> | <b>0.529(236642)</b> | <b>0.047</b> | <b>0.008</b> |

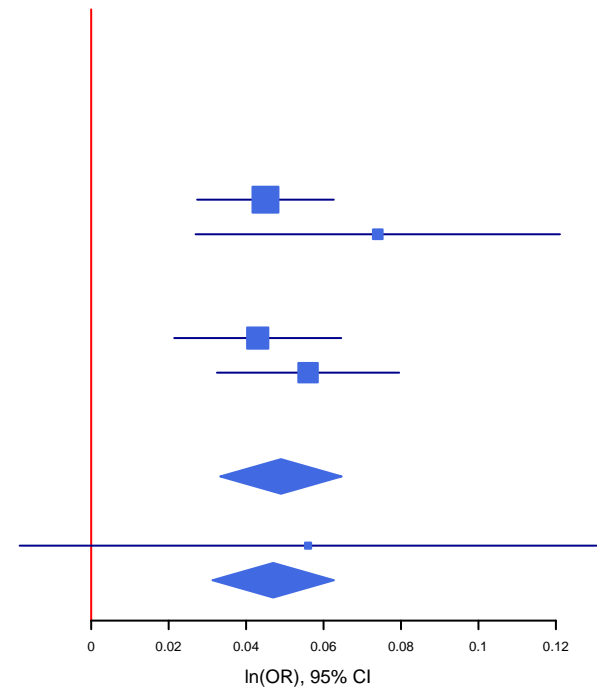

| rs4915203                                          | A/G      |             | 1:200383087     |                     |                      |              |              |
|----------------------------------------------------|----------|-------------|-----------------|---------------------|----------------------|--------------|--------------|
|                                                    | ++       |             | het_P:          |                     | 0.564                | het_I:       | 0.0          |
|                                                    | ngt      | info        | p_value         | f_ca(n)             | f_co(n)              | ln(OR)       | STDerr       |
| PGC_SCZ wave3 eur only                             | 0        | 0.99        | 2.03e-09        | 0.388(53386)        | 0.381(77258)         | 0.053        | 0.009        |
| PGC_SCZ wave3 asn only                             | 0        | 0.94        | 0.555           | 0.1(14004)          | 0.095(16757)         | 0.018        | 0.03         |
| PGC_SCZ wave2 only                                 | 0        | 0.99        | 4.71e-05        | 0.374(34850)        | 0.375(44347)         | 0.046        | 0.011        |
| PGC_SCZ wave3 (excl. wave2)                        | 0        | 0.97        | 1.47e-05        | 0.28(32540)         | 0.289(49668)         | 0.056        | 0.013        |
| <b>PGC_SCZ wave3 (incl. wave2)</b>                 | <b>0</b> | <b>0.98</b> | <b>3.3e-09</b>  | <b>0.329(67390)</b> | <b>0.33(94015)</b>   | <b>0.05</b>  | <b>0.008</b> |
| Decode – Replication                               | 0        | 1.00        | 0.656           | 0.378(1979)         | 0.398(142627)        | 0.056        | 0.039        |
| <b>PGC_SCZ wave3 (incl. wave2 and replication)</b> | <b>0</b> | <b>0.99</b> | <b>3.89e-09</b> | <b>0.33(69369)</b>  | <b>0.371(236642)</b> | <b>0.049</b> | <b>0.008</b> |

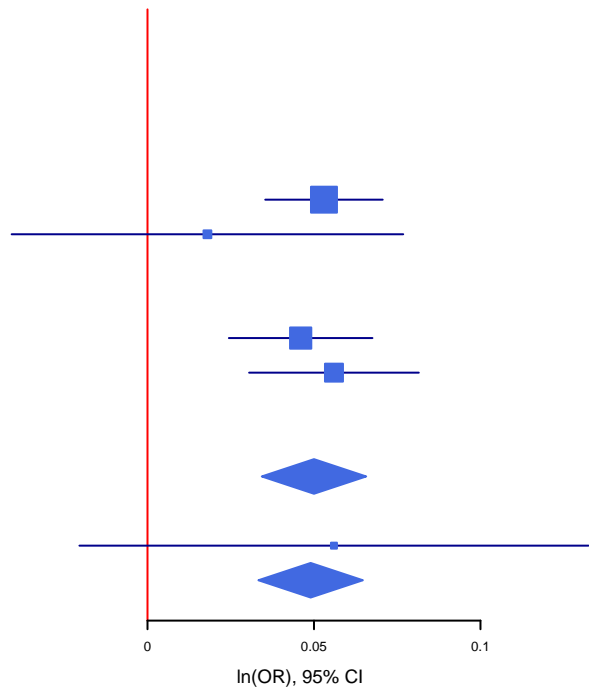

|                                                    |           |             |                        |                     |                     |               |             |
|----------------------------------------------------|-----------|-------------|------------------------|---------------------|---------------------|---------------|-------------|
| rs3739554                                          | A/G       |             | 9:129940645            |                     |                     |               |             |
|                                                    | —         |             | het_P: 0.58 het_I: 0.0 |                     |                     |               |             |
|                                                    | ngt       | info        | p_value                | f_ca(n)             | f_co(n)             | ln(OR)        | STDerr      |
| PGC_SCZ wave3 eur only                             | 64        | 0.99        | 6.99e-06               | 0.832(53386)        | 0.843(77258)        | -0.053        | 0.012       |
| PGC_SCZ wave3 asn only                             | 10        | 0.99        | 0.000565               | 0.798(14004)        | 0.815(16757)        | -0.075        | 0.022       |
| PGC_SCZ wave2 only                                 | 34        | 0.99        | 0.000472               | 0.833(34850)        | 0.845(44347)        | -0.052        | 0.015       |
| PGC_SCZ wave3 (excl. wave2)                        | 40        | 0.99        | 1.09e-05               | 0.816(32540)        | 0.831(49668)        | -0.063        | 0.014       |
| <b>PGC_SCZ wave3 (incl. wave2)</b>                 | <b>74</b> | <b>0.99</b> | <b>2.26e-08</b>        | <b>0.825(67390)</b> | <b>0.838(94015)</b> | <b>-0.058</b> | <b>0.01</b> |
| Decode – Replication                               | 0         | 1.00        | 0.0401                 | 0.839(1979)         | 0.858(142627)       | -0.063        | 0.052       |
| <b>PGC_SCZ wave3 (incl. wave2 and replication)</b> | <b>74</b> | <b>1.00</b> | <b>3.97e-09</b>        | <b>0.825(69369)</b> | <b>0.85(236642)</b> | <b>-0.059</b> | <b>0.01</b> |

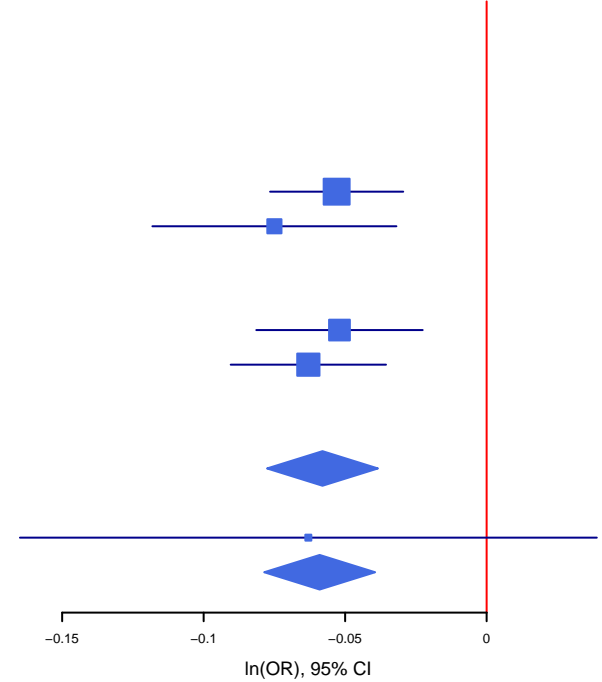

rs11165917

|     |                             |
|-----|-----------------------------|
| A/T | 1:98304427                  |
| --- | het_P: 0.149    het_I: 51.9 |

|                                             | ngt | info | p_value  | f_ca(n)      | f_co(n)       | ln(OR) | STDerr |
|---------------------------------------------|-----|------|----------|--------------|---------------|--------|--------|
| PGC_SCZ wave3 eur only                      | 2   | 0.92 | 1.2e-08  | 0.746(53386) | 0.755(77258)  | -0.059 | 0.01   |
| PGC_SCZ wave3 asn only                      | 0   | 0.68 | 0.252    | 0.894(14004) | 0.896(16757)  | -0.039 | 0.034  |
| PGC_SCZ wave2 only                          | 0   | 0.91 | 1.27e-07 | 0.755(34850) | 0.762(44347)  | -0.07  | 0.013  |
| PGC_SCZ wave3 (excl. wave2)                 | 2   | 0.84 | 0.00563  | 0.8(32540)   | 0.796(49668)  | -0.041 | 0.015  |
| PGC_SCZ wave3 (incl. wave2)                 | 2   | 0.87 | 7.13e-09 | 0.777(67390) | 0.78(94015)   | -0.057 | 0.01   |
| Decode - Replication                        | 0   | 1.00 | 0.299    | 0.763(1979)  | 0.761(142627) | -0.041 | 0.044  |
| PGC_SCZ wave3 (incl. wave2 and replication) | 2   | 0.95 | 3.99e-09 | 0.777(69369) | 0.769(236642) | -0.057 | 0.01   |

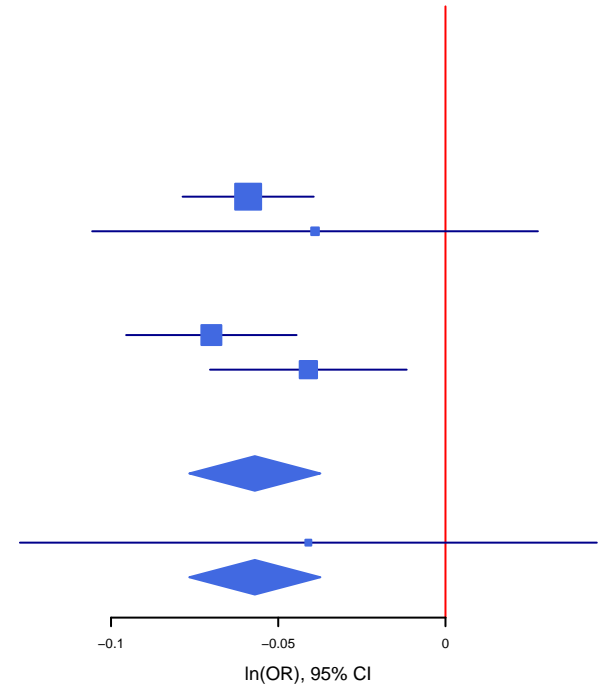

rs11740474

A/T

5:153680747

—

het\_P:

0.014

het\_I:

83.4

|  | ngt | info | p_value | f_ca(n) | f_co(n) | ln(OR) | STDerr |
|--|-----|------|---------|---------|---------|--------|--------|
|--|-----|------|---------|---------|---------|--------|--------|

PGC\_SCZ wave3 eur only

|   |      |          |              |              |        |       |
|---|------|----------|--------------|--------------|--------|-------|
| 0 | 0.97 | 1.13e-09 | 0.575(53386) | 0.585(77258) | -0.054 | 0.009 |
|---|------|----------|--------------|--------------|--------|-------|

PGC\_SCZ wave3 asn only

|   |      |      |              |              |       |       |
|---|------|------|--------------|--------------|-------|-------|
| 0 | 0.82 | 0.75 | 0.935(14004) | 0.937(16757) | 0.012 | 0.039 |
|---|------|------|--------------|--------------|-------|-------|

PGC\_SCZ wave2 only

|   |      |          |              |              |        |       |
|---|------|----------|--------------|--------------|--------|-------|
| 0 | 0.98 | 1.24e-09 | 0.591(34850) | 0.593(44347) | -0.068 | 0.011 |
|---|------|----------|--------------|--------------|--------|-------|

PGC\_SCZ wave3 (excl. wave2)

|   |      |        |              |              |        |       |
|---|------|--------|--------------|--------------|--------|-------|
| 0 | 0.92 | 0.0597 | 0.713(32540) | 0.697(49668) | -0.025 | 0.013 |
|---|------|--------|--------------|--------------|--------|-------|

**PGC\_SCZ wave3 (incl. wave2)**

|          |             |                 |                    |                     |              |              |
|----------|-------------|-----------------|--------------------|---------------------|--------------|--------------|
| <b>0</b> | <b>0.95</b> | <b>4.46e-09</b> | <b>0.65(67390)</b> | <b>0.648(94015)</b> | <b>-0.05</b> | <b>0.009</b> |
|----------|-------------|-----------------|--------------------|---------------------|--------------|--------------|

Decode – Replication

|   |      |      |             |               |        |       |
|---|------|------|-------------|---------------|--------|-------|
| 0 | 1.00 | 0.45 | 0.574(1979) | 0.559(142627) | -0.025 | 0.038 |
|---|------|------|-------------|---------------|--------|-------|

**PGC\_SCZ wave3 (incl. wave2 and replication)**

|          |             |                 |                     |                      |               |              |
|----------|-------------|-----------------|---------------------|----------------------|---------------|--------------|
| <b>0</b> | <b>0.98</b> | <b>4.03e-09</b> | <b>0.648(69369)</b> | <b>0.594(236642)</b> | <b>-0.049</b> | <b>0.008</b> |
|----------|-------------|-----------------|---------------------|----------------------|---------------|--------------|

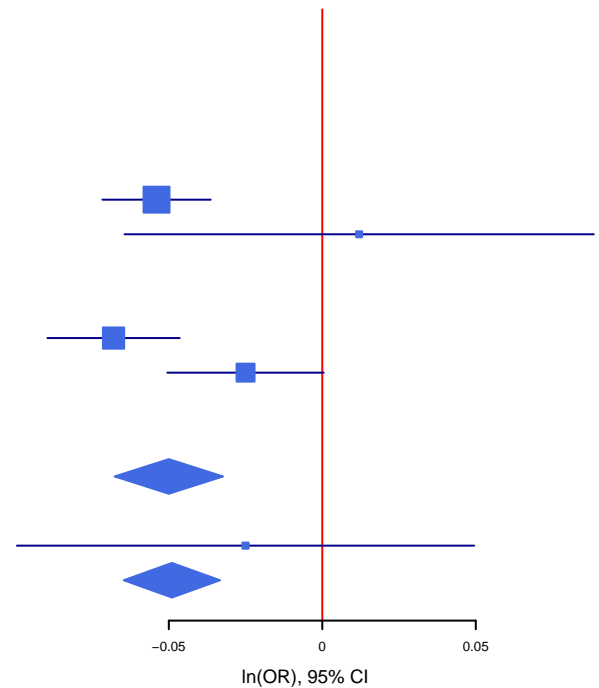



| rs2455415                                          | C/T       |             | 13:38860697     |                     |                      |               |              |
|----------------------------------------------------|-----------|-------------|-----------------|---------------------|----------------------|---------------|--------------|
|                                                    | ++        |             | het_P:          | 0.794               | het_I:               | 0.0           |              |
|                                                    | ngt       | info        | p_value         | f_ca(n)             | f_co(n)              | ln(OR)        | STDerr       |
| PGC_SCZ wave3 eur only                             | 51        | 0.99        | 1.69e-08        | 0.577(53386)        | 0.587(77258)         | -0.049        | 0.009        |
| PGC_SCZ wave3 asn only                             | 6         | 0.95        | 0.0652          | 0.755(14004)        | 0.76(16757)          | -0.037        | 0.02         |
| PGC_SCZ wave2 only                                 | 14        | 0.97        | 8.96e-06        | 0.586(34850)        | 0.591(44347)         | -0.05         | 0.011        |
| PGC_SCZ wave3 (excl. wave2)                        | 43        | 0.99        | 9.32e-05        | 0.645(32540)        | 0.641(49668)         | -0.045        | 0.012        |
| <b>PGC_SCZ wave3 (incl. wave2)</b>                 | <b>57</b> | <b>0.98</b> | <b>3.43e-09</b> | <b>0.614(67390)</b> | <b>0.617(94015)</b>  | <b>-0.048</b> | <b>0.008</b> |
| Decode – Replication                               | 0         | 1.00        | 0.548           | 0.581(1979)         | 0.547(142627)        | -0.045        | 0.038        |
| <b>PGC_SCZ wave3 (incl. wave2 and replication)</b> | <b>57</b> | <b>0.99</b> | <b>4.26e-09</b> | <b>0.613(69369)</b> | <b>0.575(236642)</b> | <b>-0.047</b> | <b>0.008</b> |

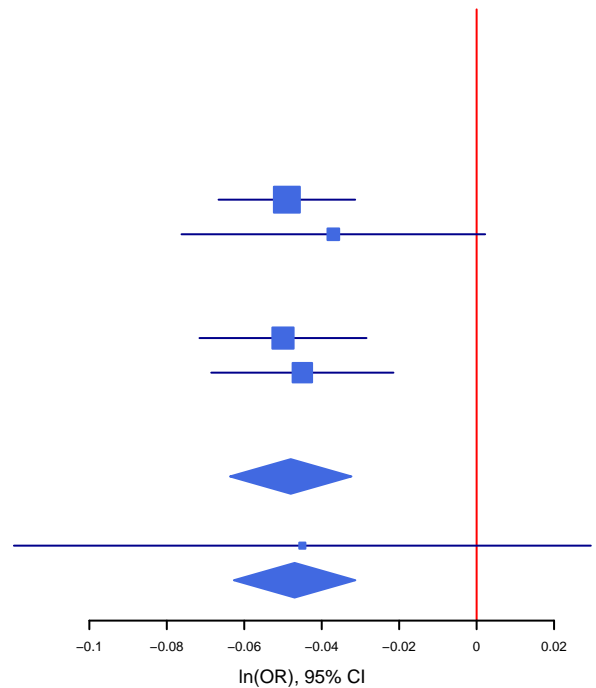

rs12301769

|     |                             |
|-----|-----------------------------|
| A/C | 12:72231313                 |
| —   | het_P: 0.258    het_I: 21.8 |

|                                             | ngt | info | p_value  | f_ca(n)      | f_co(n)       | ln(OR) | STDerr |
|---------------------------------------------|-----|------|----------|--------------|---------------|--------|--------|
| PGC_SCZ wave3 eur only                      | 0   | 0.99 | 1.78e-09 | 0.898(53386) | 0.906(77258)  | -0.087 | 0.014  |
| PGC_SCZ wave3 asn only                      | 0   | 0.92 | 0.437    | 0.965(13457) | 0.968(16217)  | -0.04  | 0.052  |
| PGC_SCZ wave2 only                          | 0   | 0.99 | 0.000131 | 0.902(34850) | 0.906(44347)  | -0.07  | 0.018  |
| PGC_SCZ wave3 (excl. wave2)                 | 0   | 0.95 | 1.88e-06 | 0.922(31993) | 0.926(49128)  | -0.102 | 0.022  |
| PGC_SCZ wave3 (incl. wave2)                 | 0   | 0.97 | 1.92e-09 | 0.911(66843) | 0.916(93475)  | -0.084 | 0.014  |
| Decode – Replication                        | 0   | 1.00 | 0.87     | 0.893(1979)  | 0.876(142627) | -0.102 | 0.06   |
| PGC_SCZ wave3 (incl. wave2 and replication) | 0   | 0.99 | 4.52e-09 | 0.91(68822)  | 0.892(236102) | -0.08  | 0.014  |

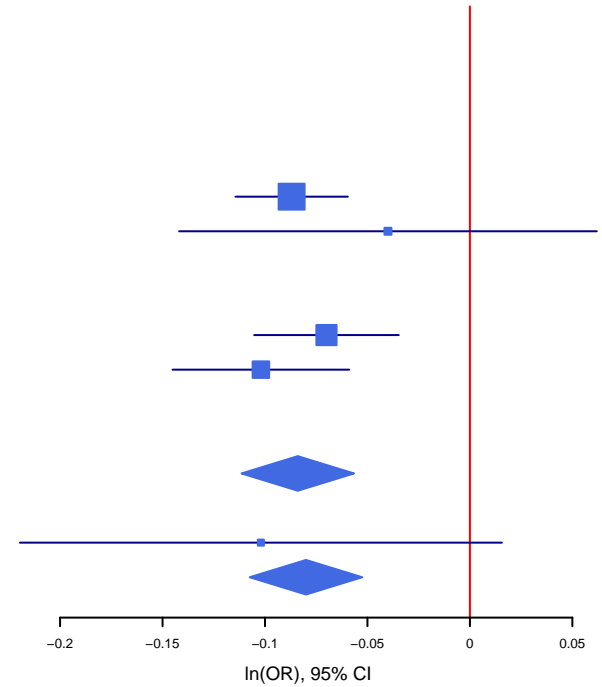

rs578470

T/C

12:50463325

—

het\_P:

0.923

het\_I:

0.0

ngt info p\_value f\_ca(n) f\_co(n) ln(OR) STDerr

PGC\_SCZ wave3 eur only

0 0.98 8.1e-07 0.564(53386) 0.575(77258) -0.043 0.009

PGC\_SCZ wave3 asn only

0 0.89 0.00478 0.84(14004) 0.852(16757) -0.071 0.025

PGC\_SCZ wave2 only

0 0.99 4.17e-05 0.578(34850) 0.579(44347) -0.045 0.011

PGC\_SCZ wave3 (excl. wave2)

0 0.95 0.000146 0.667(32540) 0.665(49668) -0.047 0.012

PGC\_SCZ wave3 (incl. wave2)

0 0.97 2.33e-08 0.621(67390) 0.625(94015) -0.046 0.008

Decode – Replication

0 1.00 0.0463 0.585(1979) 0.611(142627) -0.047 0.038

PGC\_SCZ wave3 (incl. wave2 and replication)

0 0.99 4.54e-09 0.62(69369) 0.616(236642) -0.048 0.008

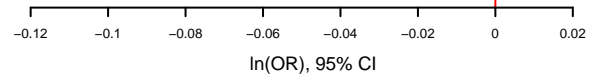

| <b>rs60135207</b>                                  | <b>G/T</b> |             | <b>3:71563777</b> |                     |                      |             |              |
|----------------------------------------------------|------------|-------------|-------------------|---------------------|----------------------|-------------|--------------|
|                                                    | --         |             | het_P:            | 0.558               | het_I:               | 0.0         |              |
|                                                    | ngt        | info        | p_value           | f_ca(n)             | f_co(n)              | ln(OR)      | STDerr       |
| PGC_SCZ wave3 eur only                             | 0          | 1.00        | 1.53e-08          | 0.596(53386)        | 0.585(77258)         | 0.05        | 0.009        |
| PGC_SCZ wave3 asn only                             | nan        | nan         | nan               | nan(nan)            | nan(nan)             | nan         | nan          |
| PGC_SCZ wave2 only                                 | 0          | 1.00        | 1.76e-06          | 0.599(32998)        | 0.588(43387)         | 0.054       | 0.011        |
| PGC_SCZ wave3 (excl. wave2)                        | 0          | 0.97        | 0.00168           | 0.617(23077)        | 0.599(36570)         | 0.043       | 0.014        |
| <b>PGC_SCZ wave3 (incl. wave2)</b>                 | <b>0</b>   | <b>0.99</b> | <b>1.27e-08</b>   | <b>0.607(56075)</b> | <b>0.593(79957)</b>  | <b>0.05</b> | <b>0.009</b> |
| Decode – Replication                               | 0          | 1.00        | 0.184             | 0.59(1979)          | 0.571(142627)        | 0.043       | 0.038        |
| <b>PGC_SCZ wave3 (incl. wave2 and replication)</b> | <b>0</b>   | <b>0.99</b> | <b>4.8e-09</b>    | <b>0.606(58054)</b> | <b>0.579(222584)</b> | <b>0.05</b> | <b>0.008</b> |

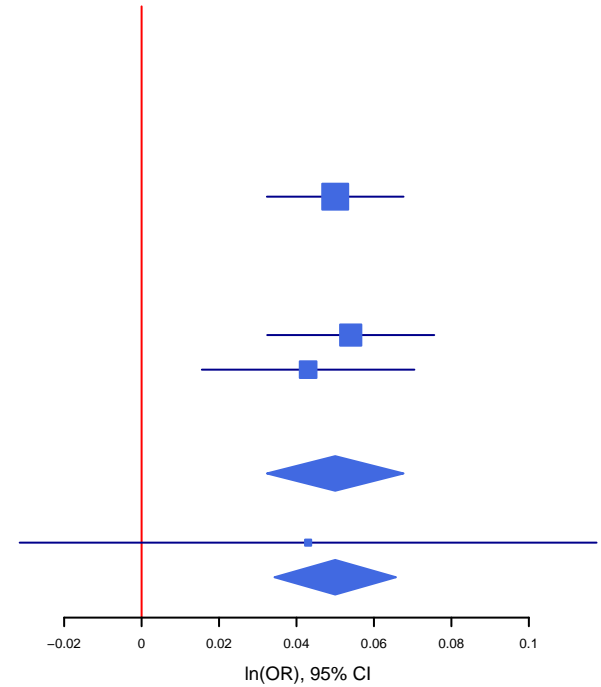

rs79212538

|     |                          |
|-----|--------------------------|
| G/T | 5:151993104              |
| ++  | het_P: 0.093 het_I: 64.6 |

|                                             | ngt | info | p_value  | f_ca(n)      | f_co(n)       | ln(OR) | STDerr |
|---------------------------------------------|-----|------|----------|--------------|---------------|--------|--------|
| PGC_SCZ wave3 eur only                      | 5   | 0.98 | 4.33e-08 | 0.95(53386)  | 0.954(77258)  | -0.111 | 0.02   |
| PGC_SCZ wave3 asn only                      | 0   | 0.67 | 0.218    | 0.985(10081) | 0.985(13026)  | -0.124 | 0.101  |
| PGC_SCZ wave2 only                          | 0   | 0.97 | 6.41e-08 | 0.95(34850)  | 0.954(44347)  | -0.139 | 0.026  |
| PGC_SCZ wave3 (excl. wave2)                 | 5   | 0.90 | 0.0242   | 0.961(28617) | 0.962(45937)  | -0.071 | 0.031  |
| PGC_SCZ wave3 (incl. wave2)                 | 5   | 0.94 | 2e-08    | 0.955(63467) | 0.958(90284)  | -0.112 | 0.02   |
| Decode - Replication                        | 0   | 1.00 | 0.0942   | 0.948(1979)  | 0.936(142627) | -0.071 | 0.079  |
| PGC_SCZ wave3 (incl. wave2 and replication) | 5   | 0.97 | 4.86e-09 | 0.955(65446) | 0.944(232911) | -0.113 | 0.019  |

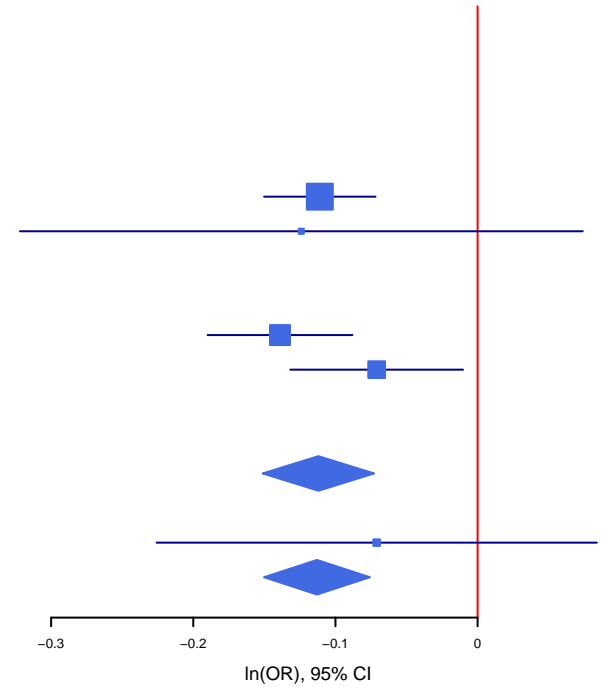

| <b>rs4779050</b>                                   |          |             |                 | <b>T/G</b> |                     | <b>15:83368738</b>   |              |              |        |  |      |
|----------------------------------------------------|----------|-------------|-----------------|------------|---------------------|----------------------|--------------|--------------|--------|--|------|
|                                                    |          |             |                 | ++         |                     | het_P:               |              | 0.185        | het_I: |  | 43.0 |
|                                                    | ngt      | info        | p_value         |            | f_ca(n)             | f_co(n)              | ln(OR)       | STDerr       |        |  |      |
| PGC_SCZ wave3 eur only                             | 1        | 1.00        | 7.27e-11        |            | 0.381(53386)        | 0.367(77258)         | 0.058        | 0.009        |        |  |      |
| PGC_SCZ wave3 asn only                             | 1        | 0.98        | 0.311           |            | 0.476(14004)        | 0.47(16757)          | 0.017        | 0.017        |        |  |      |
| PGC_SCZ wave2 only                                 | 1        | 1.00        | 8.85e-08        |            | 0.383(34850)        | 0.367(44347)         | 0.06         | 0.011        |        |  |      |
| PGC_SCZ wave3 (excl. wave2)                        | 1        | 0.99        | 0.000485        |            | 0.419(32540)        | 0.402(49668)         | 0.039        | 0.011        |        |  |      |
| <b>PGC_SCZ wave3 (incl. wave2)</b>                 | <b>2</b> | <b>0.99</b> | <b>4.18e-10</b> |            | <b>0.401(67390)</b> | <b>0.386(94015)</b>  | <b>0.049</b> | <b>0.008</b> |        |  |      |
| Decode – Replication                               | 0        | 1.00        | 0.152           |            | 0.361(1979)         | 0.347(142627)        | 0.039        | 0.04         |        |  |      |
| <b>PGC_SCZ wave3 (incl. wave2 and replication)</b> | <b>2</b> | <b>1.00</b> | <b>5.04e-09</b> |            | <b>0.4(69369)</b>   | <b>0.362(236642)</b> | <b>0.045</b> | <b>0.008</b> |        |  |      |

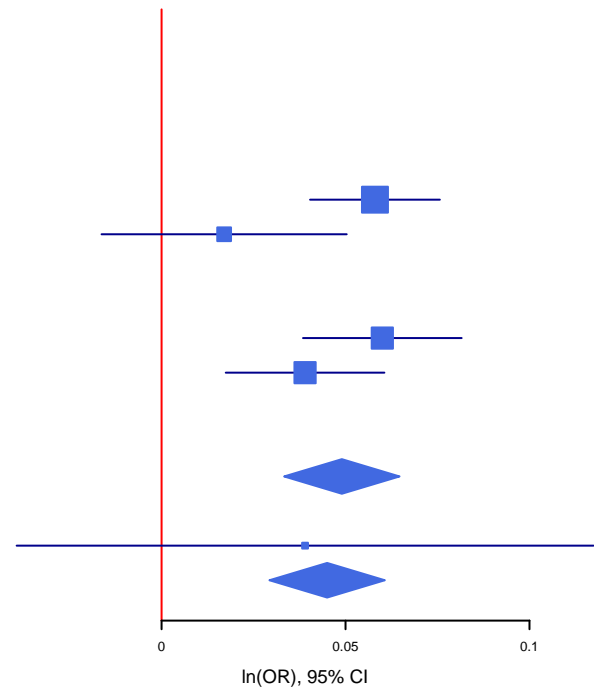

rs619091

A/T

11:133884137

—

het\_P:

0.183

het\_I:

43.6

|  | ngt | info | p_value | f_ca(n) | f_co(n) | ln(OR) | STDerr |
|--|-----|------|---------|---------|---------|--------|--------|
|--|-----|------|---------|---------|---------|--------|--------|

PGC\_SCZ wave3 eur only

|   |      |          |              |              |       |       |
|---|------|----------|--------------|--------------|-------|-------|
| 0 | 0.97 | 6.73e-06 | 0.394(53386) | 0.403(77258) | -0.04 | 0.009 |
|---|------|----------|--------------|--------------|-------|-------|

PGC\_SCZ wave3 asn only

|   |      |          |              |              |        |       |
|---|------|----------|--------------|--------------|--------|-------|
| 0 | 0.93 | 0.000423 | 0.488(14004) | 0.505(16757) | -0.062 | 0.018 |
|---|------|----------|--------------|--------------|--------|-------|

PGC\_SCZ wave2 only

|   |      |          |            |              |        |       |
|---|------|----------|------------|--------------|--------|-------|
| 0 | 0.98 | 7.92e-07 | 0.4(34850) | 0.409(44347) | -0.055 | 0.011 |
|---|------|----------|------------|--------------|--------|-------|

PGC\_SCZ wave3 (excl. wave2)

|   |      |         |              |              |        |       |
|---|------|---------|--------------|--------------|--------|-------|
| 0 | 0.95 | 0.00294 | 0.429(32540) | 0.432(49668) | -0.034 | 0.011 |
|---|------|---------|--------------|--------------|--------|-------|

**PGC\_SCZ wave3 (incl. wave2)**

|          |             |                 |                     |                     |               |              |
|----------|-------------|-----------------|---------------------|---------------------|---------------|--------------|
| <b>0</b> | <b>0.96</b> | <b>2.05e-08</b> | <b>0.414(67390)</b> | <b>0.421(94015)</b> | <b>-0.045</b> | <b>0.008</b> |
|----------|-------------|-----------------|---------------------|---------------------|---------------|--------------|

Decode – Replication

|   |      |       |             |               |        |       |
|---|------|-------|-------------|---------------|--------|-------|
| 0 | 1.00 | 0.057 | 0.414(1979) | 0.418(142627) | -0.034 | 0.039 |
|---|------|-------|-------------|---------------|--------|-------|

**PGC\_SCZ wave3 (incl. wave2 and replication)**

|          |             |                 |                     |                      |               |              |
|----------|-------------|-----------------|---------------------|----------------------|---------------|--------------|
| <b>0</b> | <b>0.99</b> | <b>5.08e-09</b> | <b>0.414(69369)</b> | <b>0.419(236642)</b> | <b>-0.046</b> | <b>0.008</b> |
|----------|-------------|-----------------|---------------------|----------------------|---------------|--------------|

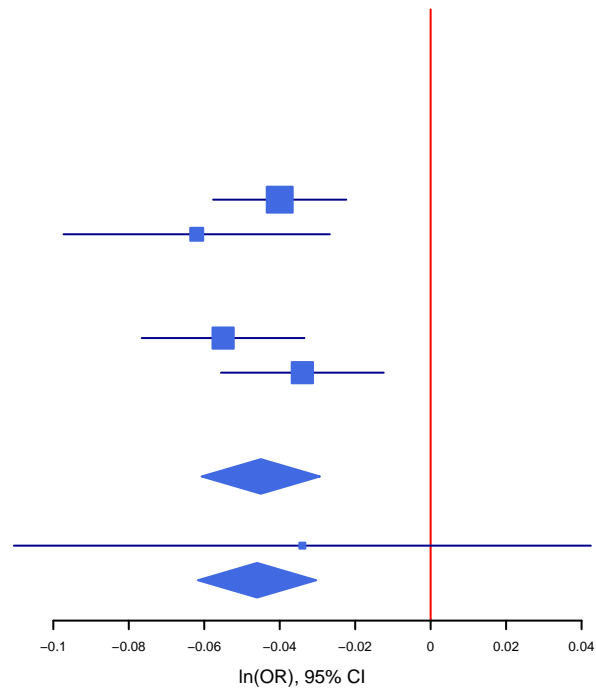

rs12431743

G/A

14:84673716

++

het\_P:

0.906

het\_I:

0.0

|  | ngt | info | p_value | f_ca(n) | f_co(n) | ln(OR) | STDerr |
|--|-----|------|---------|---------|---------|--------|--------|
|--|-----|------|---------|---------|---------|--------|--------|

PGC\_SCZ wave3 eur only

|   |      |          |              |              |        |       |
|---|------|----------|--------------|--------------|--------|-------|
| 1 | 1.00 | 1.29e-06 | 0.386(53386) | 0.401(77258) | -0.043 | 0.009 |
|---|------|----------|--------------|--------------|--------|-------|

PGC\_SCZ wave3 asn only

|   |      |         |              |              |        |       |
|---|------|---------|--------------|--------------|--------|-------|
| 0 | 1.00 | 0.00209 | 0.278(14004) | 0.289(16757) | -0.058 | 0.019 |
|---|------|---------|--------------|--------------|--------|-------|

PGC\_SCZ wave2 only

|   |      |          |              |              |        |       |
|---|------|----------|--------------|--------------|--------|-------|
| 1 | 1.00 | 6.11e-05 | 0.388(34850) | 0.408(44347) | -0.045 | 0.011 |
|---|------|----------|--------------|--------------|--------|-------|

PGC\_SCZ wave3 (excl. wave2)

|   |      |          |              |              |        |       |
|---|------|----------|--------------|--------------|--------|-------|
| 0 | 1.00 | 5.31e-05 | 0.338(32540) | 0.358(49668) | -0.047 | 0.012 |
|---|------|----------|--------------|--------------|--------|-------|

**PGC\_SCZ wave3 (incl. wave2)**

|          |             |                 |                     |                     |               |              |
|----------|-------------|-----------------|---------------------|---------------------|---------------|--------------|
| <b>1</b> | <b>1.00</b> | <b>1.26e-08</b> | <b>0.364(67390)</b> | <b>0.381(94015)</b> | <b>-0.046</b> | <b>0.008</b> |
|----------|-------------|-----------------|---------------------|---------------------|---------------|--------------|

Decode - Replication

|   |      |       |             |               |        |      |
|---|------|-------|-------------|---------------|--------|------|
| 0 | 1.00 | 0.201 | 0.373(1979) | 0.368(142627) | -0.047 | 0.04 |
|---|------|-------|-------------|---------------|--------|------|

**PGC\_SCZ wave3 (incl. wave2 and replication)**

|          |             |                 |                     |                      |               |              |
|----------|-------------|-----------------|---------------------|----------------------|---------------|--------------|
| <b>1</b> | <b>1.00</b> | <b>5.18e-09</b> | <b>0.364(69369)</b> | <b>0.373(236642)</b> | <b>-0.046</b> | <b>0.008</b> |
|----------|-------------|-----------------|---------------------|----------------------|---------------|--------------|

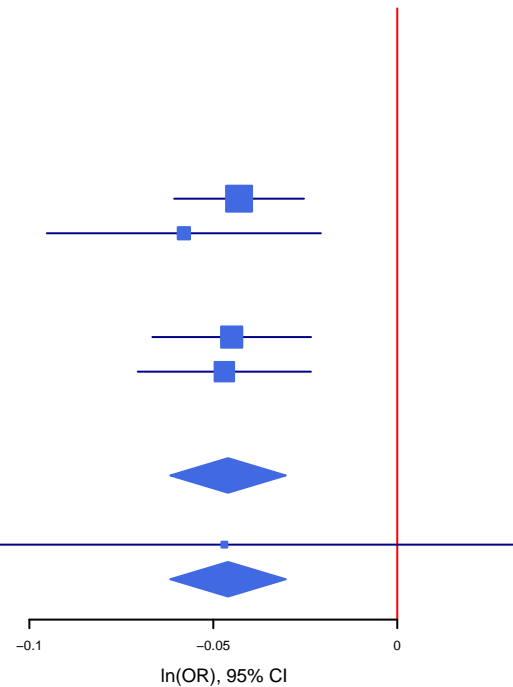



rs61857878

A/T  
++  
10:92789488  
het\_P: 0.489 het\_I: 0.0

|                                                    | ngt      | info        | p_value         | f_ca(n)             | f_co(n)             | ln(OR)       | STDerr      |
|----------------------------------------------------|----------|-------------|-----------------|---------------------|---------------------|--------------|-------------|
| PGC_SCZ wave3 eur only                             | 0        | 0.95        | 4.44e-09        | 0.76(53386)         | 0.746(77258)        | 0.06         | 0.01        |
| PGC_SCZ wave3 asn only                             | 0        | 0.84        | 0.14            | 0.936(14004)        | 0.936(16757)        | 0.057        | 0.038       |
| PGC_SCZ wave2 only                                 | 0        | 0.97        | 2.7e-05         | 0.769(34850)        | 0.753(44347)        | 0.054        | 0.013       |
| PGC_SCZ wave3 (excl. wave2)                        | 0        | 0.90        | 1.03e-05        | 0.825(32540)        | 0.804(49668)        | 0.068        | 0.015       |
| <b>PGC_SCZ wave3 (incl. wave2)</b>                 | <b>0</b> | <b>0.93</b> | <b>1.46e-09</b> | <b>0.796(67390)</b> | <b>0.78(94015)</b>  | <b>0.06</b>  | <b>0.01</b> |
| Decode – Replication                               | 0        | 1.00        | 0.768           | 0.759(1979)         | 0.731(142627)       | 0.068        | 0.044       |
| <b>PGC_SCZ wave3 (incl. wave2 and replication)</b> | <b>0</b> | <b>0.97</b> | <b>5.24e-09</b> | <b>0.795(69369)</b> | <b>0.75(236642)</b> | <b>0.056</b> | <b>0.01</b> |

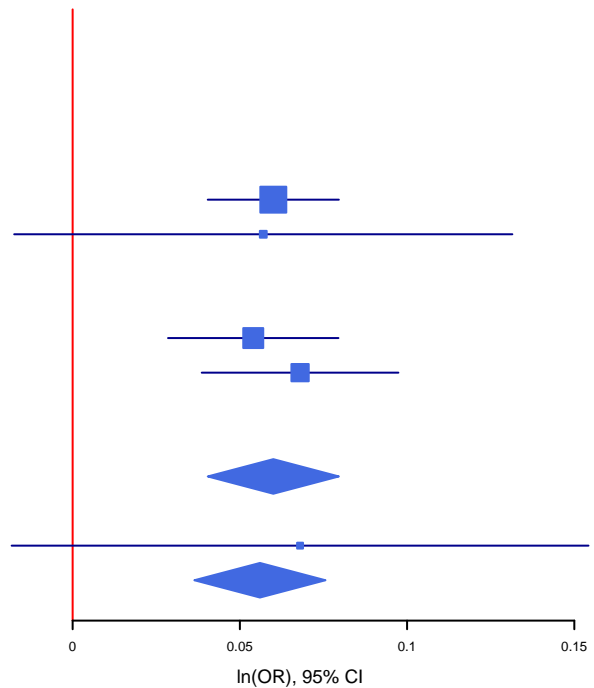

| rs1924377                                          | G/C      |             | 13:38362106     |                     |                      |              |              |
|----------------------------------------------------|----------|-------------|-----------------|---------------------|----------------------|--------------|--------------|
|                                                    | ---      |             | het_P:          | 0.009               | het_I:               | 85.1         |              |
|                                                    | ngt      | info        | p_value         | f_ca(n)             | f_co(n)              | ln(OR)       | STDerr       |
| PGC_SCZ wave3 eur only                             | 0        | 0.96        | 1.15e-07        | 0.434(53386)        | 0.424(77258)         | 0.047        | 0.009        |
| PGC_SCZ wave3 asn only                             | 0        | 0.86        | 0.0252          | 0.716(14004)        | 0.717(16757)         | 0.046        | 0.021        |
| PGC_SCZ wave2 only                                 | 0        | 0.98        | 0.0134          | 0.45(34850)         | 0.434(44347)         | 0.027        | 0.011        |
| PGC_SCZ wave3 (excl. wave2)                        | 0        | 0.91        | 6.47e-09        | 0.538(32540)        | 0.514(49668)         | 0.07         | 0.012        |
| <b>PGC_SCZ wave3 (incl. wave2)</b>                 | <b>0</b> | <b>0.94</b> | <b>8.71e-09</b> | <b>0.492(67390)</b> | <b>0.476(94015)</b>  | <b>0.047</b> | <b>0.008</b> |
| Decode – Replication                               | 0        | 1.00        | 0.24            | 0.418(1979)         | 0.399(142627)        | 0.07         | 0.039        |
| <b>PGC_SCZ wave3 (incl. wave2 and replication)</b> | <b>0</b> | <b>0.97</b> | <b>5.25e-09</b> | <b>0.49(69369)</b>  | <b>0.429(236642)</b> | <b>0.047</b> | <b>0.008</b> |

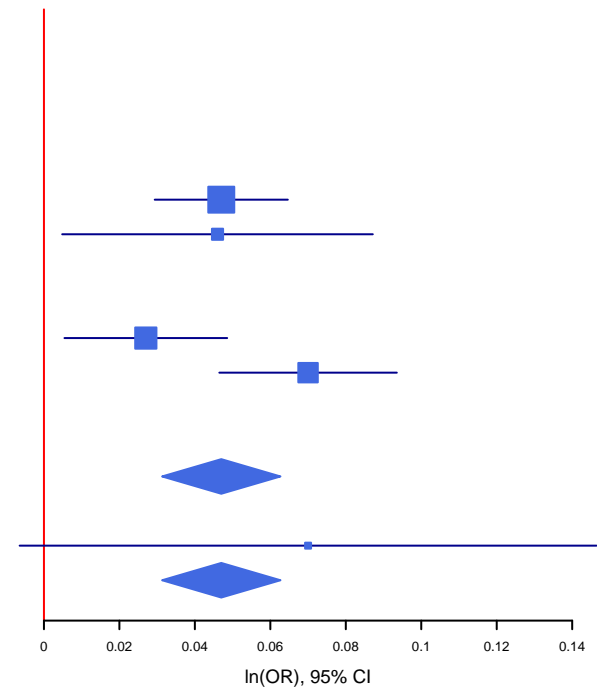

|                                                    |           |             |                 |                     |                      |               |              |
|----------------------------------------------------|-----------|-------------|-----------------|---------------------|----------------------|---------------|--------------|
| rs2905625                                          | A/C       |             | 4:105445205     |                     |                      |               |              |
|                                                    | —         |             | het_P:          | 0.181               | het_I:               | 44.1          |              |
|                                                    | ngt       | info        | p_value         | f_ca(n)             | f_co(n)              | ln(OR)        | STDerr       |
| PGC_SCZ wave3 eur only                             | 30        | 0.99        | 7.2e-08         | 0.534(53386)        | 0.546(77258)         | -0.047        | 0.009        |
| PGC_SCZ wave3 asn only                             | 6         | 0.91        | 0.248           | 0.411(14004)        | 0.415(16757)         | -0.021        | 0.018        |
| PGC_SCZ wave2 only                                 | 2         | 0.98        | 2.03e-06        | 0.531(34850)        | 0.549(44347)         | -0.052        | 0.011        |
| PGC_SCZ wave3 (excl. wave2)                        | 34        | 0.96        | 0.00507         | 0.484(32540)        | 0.499(49668)         | -0.031        | 0.011        |
| <b>PGC_SCZ wave3 (incl. wave2)</b>                 | <b>36</b> | <b>0.97</b> | <b>8.75e-08</b> | <b>0.509(67390)</b> | <b>0.523(94015)</b>  | <b>-0.042</b> | <b>0.008</b> |
| Decode – Replication                               | 0         | 1.00        | 0.0033          | 0.578(1979)         | 0.598(142627)        | -0.031        | 0.038        |
| <b>PGC_SCZ wave3 (incl. wave2 and replication)</b> | <b>36</b> | <b>0.99</b> | <b>5.32e-09</b> | <b>0.511(69369)</b> | <b>0.568(236642)</b> | <b>-0.045</b> | <b>0.008</b> |

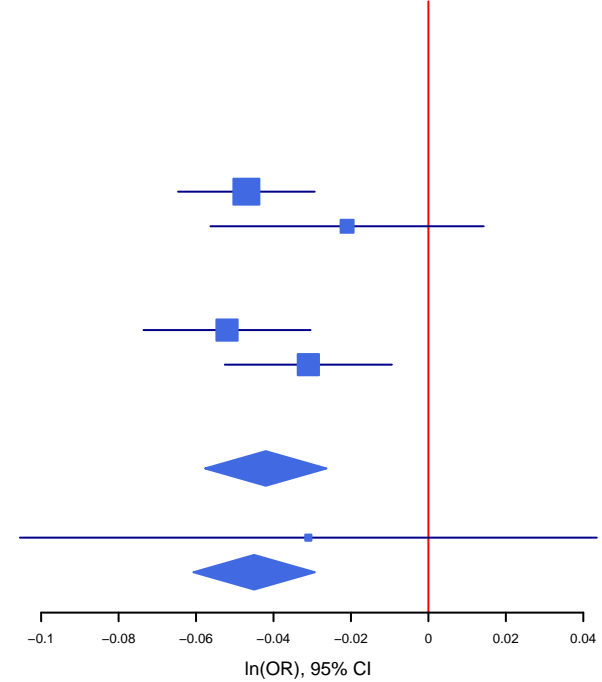

|                                                    |          |             |                         |                     |                      |               |             |
|----------------------------------------------------|----------|-------------|-------------------------|---------------------|----------------------|---------------|-------------|
| rs6546857                                          | A/G      |             | 2:73837955              |                     |                      |               |             |
|                                                    | --       |             | het_P: 0.593 het_I: 0.0 |                     |                      |               |             |
|                                                    | ngt      | info        | p_value                 | f_ca(n)             | f_co(n)              | ln(OR)        | STDerr      |
| PGC_SCZ wave3 eur only                             | 6        | 0.99        | 2.74e-09                | 0.757(53386)        | 0.768(77258)         | -0.06         | 0.01        |
| PGC_SCZ wave3 asn only                             | nan      | nan         | nan                     | nan(nan)            | nan(nan)             | nan           | nan         |
| PGC_SCZ wave2 only                                 | 0        | 0.99        | 7.57e-07                | 0.757(32998)        | 0.769(43387)         | -0.065        | 0.013       |
| PGC_SCZ wave3 (excl. wave2)                        | 6        | 0.94        | 0.000846                | 0.805(25892)        | 0.797(39355)         | -0.054        | 0.016       |
| <b>PGC_SCZ wave3 (incl. wave2)</b>                 | <b>6</b> | <b>0.96</b> | <b>2.8e-09</b>          | <b>0.778(58890)</b> | <b>0.782(82742)</b>  | <b>-0.06</b>  | <b>0.01</b> |
| Decode - Replication                               | 0        | 1.00        | 0.949                   | 0.745(1979)         | 0.704(142627)        | -0.054        | 0.043       |
| <b>PGC_SCZ wave3 (incl. wave2 and replication)</b> | <b>6</b> | <b>0.99</b> | <b>5.58e-09</b>         | <b>0.777(60869)</b> | <b>0.733(225369)</b> | <b>-0.057</b> | <b>0.01</b> |

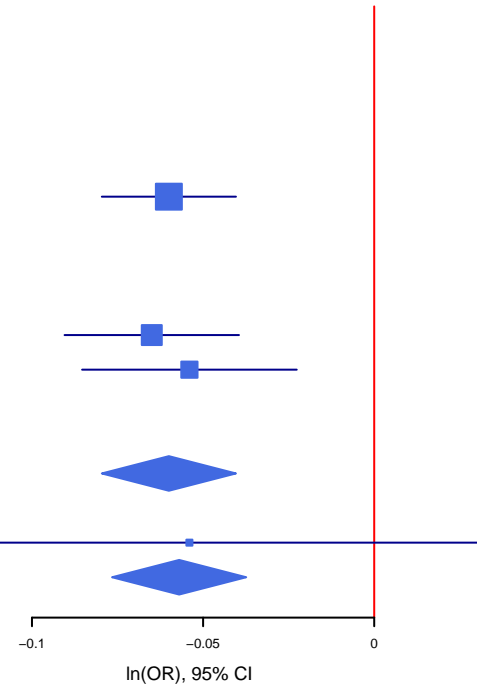

|                                                    |          |             |                 |                     |                      |              |              |
|----------------------------------------------------|----------|-------------|-----------------|---------------------|----------------------|--------------|--------------|
| rs2944821                                          | G/C      |             | 7:71795998      |                     |                      |              |              |
|                                                    | --       |             | het_P:          |                     | 0.237                | het_I:       | 28.4         |
|                                                    | ngt      | info        | p_value         | f_ca(n)             | f_co(n)              | ln(OR)       | STDerr       |
| PGC_SCZ wave3 eur only                             | 0        | 1.00        | 8.22e-08        | 0.574(53386)        | 0.564(77258)         | 0.047        | 0.009        |
| PGC_SCZ wave3 asn only                             | 0        | 0.98        | 0.00636         | 0.756(14004)        | 0.749(16757)         | 0.054        | 0.02         |
| PGC_SCZ wave2 only                                 | 0        | 1.00        | 0.00041         | 0.587(34850)        | 0.576(44347)         | 0.039        | 0.011        |
| PGC_SCZ wave3 (excl. wave2)                        | 0        | 0.99        | 5.83e-07        | 0.638(32540)        | 0.615(49668)         | 0.058        | 0.012        |
| <b>PGC_SCZ wave3 (incl. wave2)</b>                 | <b>0</b> | <b>1.00</b> | <b>1.9e-09</b>  | <b>0.612(67390)</b> | <b>0.597(94015)</b>  | <b>0.048</b> | <b>0.008</b> |
| Decode – Replication                               | 0        | 1.00        | 0.93            | 0.546(1979)         | 0.571(142627)        | 0.058        | 0.038        |
| <b>PGC_SCZ wave3 (incl. wave2 and replication)</b> | <b>0</b> | <b>1.00</b> | <b>5.61e-09</b> | <b>0.61(69369)</b>  | <b>0.581(236642)</b> | <b>0.046</b> | <b>0.008</b> |

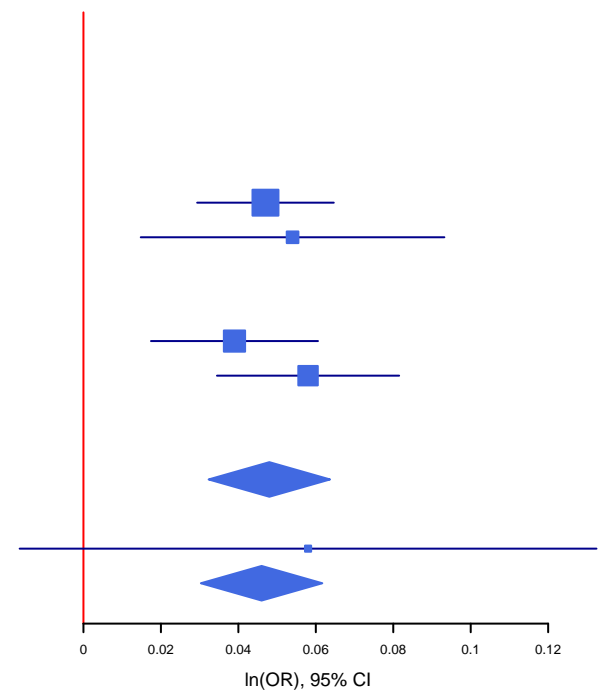

| rs4958696                                          | A/G      |             | 5:153485075     |                     |                      |               |              |
|----------------------------------------------------|----------|-------------|-----------------|---------------------|----------------------|---------------|--------------|
|                                                    | —        |             | het_P:          |                     | 0.836                | het_I:        | 0.0          |
|                                                    | ngt      | info        | p_value         | f_ca(n)             | f_co(n)              | ln(OR)        | STDerr       |
| PGC_SCZ wave3 eur only                             | 1        | 0.99        | 1.44e-07        | 0.667(53386)        | 0.677(77258)         | -0.048        | 0.009        |
| PGC_SCZ wave3 asn only                             | 0        | 0.97        | 0.163           | 0.864(14004)        | 0.87(16757)          | -0.035        | 0.025        |
| PGC_SCZ wave2 only                                 | 1        | 0.99        | 3.35e-05        | 0.68(34850)         | 0.683(44347)         | -0.048        | 0.012        |
| PGC_SCZ wave3 (excl. wave2)                        | 0        | 0.98        | 0.000473        | 0.738(32540)        | 0.737(49668)         | -0.045        | 0.013        |
| <b>PGC_SCZ wave3 (incl. wave2)</b>                 | <b>1</b> | <b>0.98</b> | <b>5.93e-08</b> | <b>0.708(67390)</b> | <b>0.711(94015)</b>  | <b>-0.047</b> | <b>0.009</b> |
| Decode – Replication                               | 0        | 1.00        | 0.018           | 0.698(1979)         | 0.7(142627)          | -0.045        | 0.041        |
| <b>PGC_SCZ wave3 (incl. wave2 and replication)</b> | <b>1</b> | <b>0.99</b> | <b>5.78e-09</b> | <b>0.708(69369)</b> | <b>0.704(236642)</b> | <b>-0.049</b> | <b>0.008</b> |

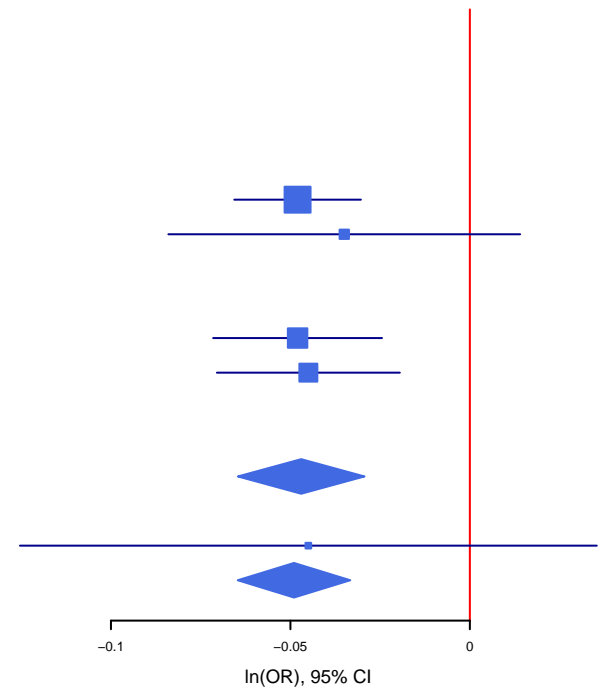

| rs4697446                                          | G/T       |             | 4:24269622      |                     |                     |               |              |
|----------------------------------------------------|-----------|-------------|-----------------|---------------------|---------------------|---------------|--------------|
|                                                    | ++        |             | het_P:          | 0.269               | het_I:              | 18.0          |              |
|                                                    | ngt       | info        | p_value         | f_ca(n)             | f_co(n)             | ln(OR)        | STDerr       |
| PGC_SCZ wave3 eur only                             | 34        | 1.00        | 3.86e-05        | 0.598(53386)        | 0.608(77258)        | -0.036        | 0.009        |
| PGC_SCZ wave3 asn only                             | 8         | 0.96        | 9.68e-06        | 0.363(14004)        | 0.378(16757)        | -0.079        | 0.018        |
| PGC_SCZ wave2 only                                 | 32        | 1.00        | 0.00113         | 0.587(34850)        | 0.604(44347)        | -0.036        | 0.011        |
| PGC_SCZ wave3 (excl. wave2)                        | 10        | 0.98        | 2.13e-06        | 0.51(32540)         | 0.533(49668)        | -0.053        | 0.011        |
| <b>PGC_SCZ wave3 (incl. wave2)</b>                 | <b>42</b> | <b>0.99</b> | <b>1.67e-08</b> | <b>0.549(67390)</b> | <b>0.567(94015)</b> | <b>-0.045</b> | <b>0.008</b> |
| Decode – Replication                               | 0         | 1.00        | 0.148           | 0.604(1979)         | 0.621(142627)       | -0.053        | 0.039        |
| <b>PGC_SCZ wave3 (incl. wave2 and replication)</b> | <b>42</b> | <b>1.00</b> | <b>5.86e-09</b> | <b>0.551(69369)</b> | <b>0.6(236642)</b>  | <b>-0.045</b> | <b>0.008</b> |

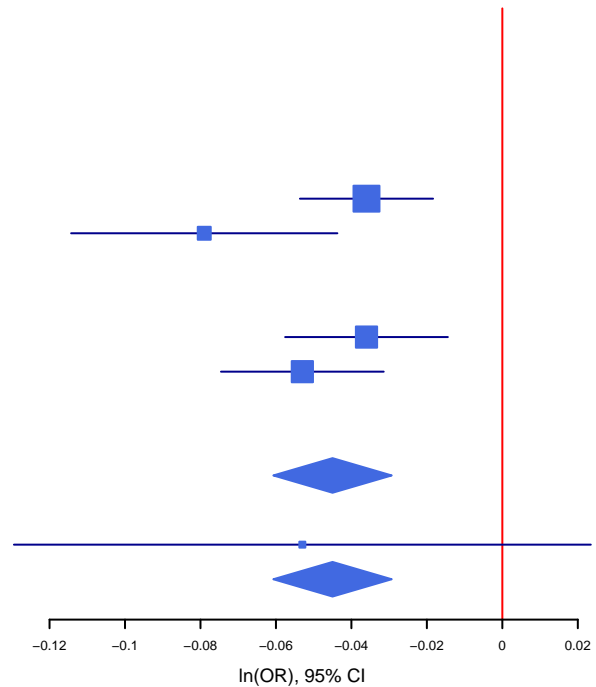

rs11897811

C/T

2:76267139

++

het\_P:

0.448

het\_I:

0.0

|                                                    | ngt      | info        | p_value         | f_ca(n)             | f_co(n)              | ln(OR)        | STDerr      |
|----------------------------------------------------|----------|-------------|-----------------|---------------------|----------------------|---------------|-------------|
| PGC_SCZ wave3 eur only                             | 0        | 1.00        | 6.9e-08         | 0.776(53386)        | 0.788(77258)         | -0.056        | 0.01        |
| PGC_SCZ wave3 asn only                             | 0        | 0.96        | 0.0682          | 0.96(14004)         | 0.964(16757)         | -0.084        | 0.046       |
| PGC_SCZ wave2 only                                 | 0        | 1.00        | 1.56e-06        | 0.788(34850)        | 0.793(44347)         | -0.064        | 0.013       |
| PGC_SCZ wave3 (excl. wave2)                        | 0        | 0.98        | 0.00198         | 0.842(32540)        | 0.842(49668)         | -0.048        | 0.016       |
| <b>PGC_SCZ wave3 (incl. wave2)</b>                 | <b>0</b> | <b>0.99</b> | <b>1.49e-08</b> | <b>0.814(67390)</b> | <b>0.819(94015)</b>  | <b>-0.058</b> | <b>0.01</b> |
| Decode - Replication                               | 0        | 1.00        | 0.147           | 0.788(1979)         | 0.803(142627)        | -0.048        | 0.046       |
| <b>PGC_SCZ wave3 (incl. wave2 and replication)</b> | <b>0</b> | <b>1.00</b> | <b>5.98e-09</b> | <b>0.813(69369)</b> | <b>0.809(236642)</b> | <b>-0.058</b> | <b>0.01</b> |

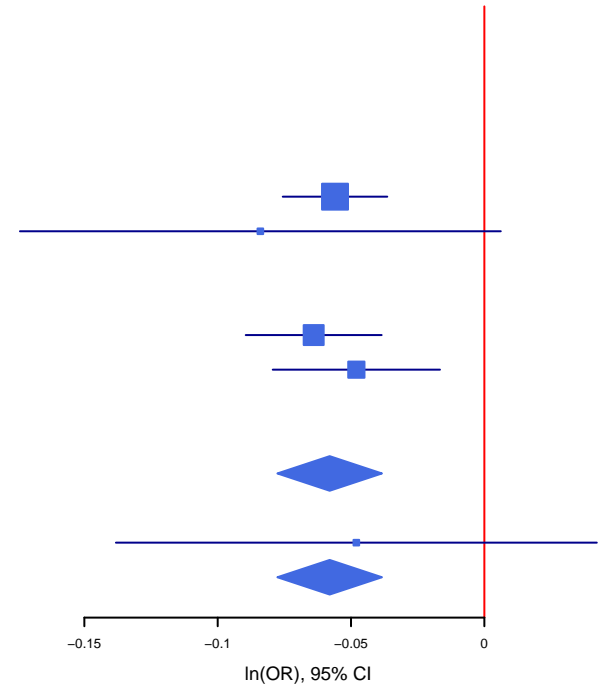



rs6484367

|     |                         |
|-----|-------------------------|
| G/A | 11:28387459             |
| --- | het_P: 0.337 het_I: 0.0 |

|                                             | ngt | info | p_value  | f_ca(n)      | f_co(n)       | ln(OR) | STDerr |
|---------------------------------------------|-----|------|----------|--------------|---------------|--------|--------|
| PGC_SCZ wave3 eur only                      | 0   | 0.98 | 1.38e-06 | 0.515(53386) | 0.506(77258)  | 0.042  | 0.009  |
| PGC_SCZ wave3 asn only                      | 0   | 0.96 | 0.00134  | 0.288(14004) | 0.273(16757)  | 0.062  | 0.019  |
| PGC_SCZ wave2 only                          | 0   | 0.98 | 0.000534 | 0.503(34850) | 0.501(44347)  | 0.038  | 0.011  |
| PGC_SCZ wave3 (excl. wave2)                 | 0   | 0.97 | 3.32e-06 | 0.431(32540) | 0.431(49668)  | 0.053  | 0.011  |
| PGC_SCZ wave3 (incl. wave2)                 | 0   | 0.98 | 1.08e-08 | 0.468(67390) | 0.464(94015)  | 0.045  | 0.008  |
| Decode - Replication                        | 0   | 1.00 | 0.305    | 0.503(1979)  | 0.51(142627)  | 0.053  | 0.038  |
| PGC_SCZ wave3 (incl. wave2 and replication) | 0   | 0.99 | 6.2e-09  | 0.469(69369) | 0.492(236642) | 0.045  | 0.008  |

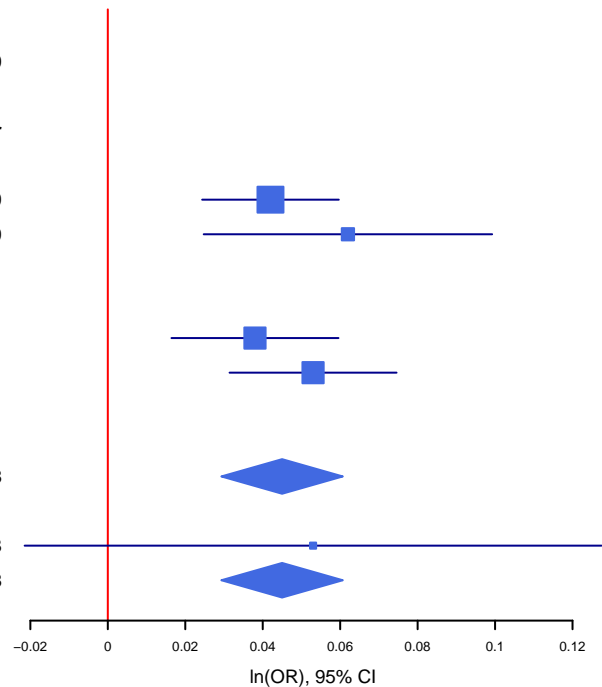

rs308697

C/A

3:161487491

—

het\_P:

0.79

het\_I:

0.0

| ngt | info | p_value | f_ca(n) | f_co(n) | ln(OR) | STDerr |
|-----|------|---------|---------|---------|--------|--------|
|-----|------|---------|---------|---------|--------|--------|

PGC\_SCZ wave3 eur only

|   |      |          |              |              |      |       |
|---|------|----------|--------------|--------------|------|-------|
| 0 | 0.99 | 8.83e-09 | 0.574(53386) | 0.564(77258) | 0.05 | 0.009 |
|---|------|----------|--------------|--------------|------|-------|

PGC\_SCZ wave3 asn only

|   |      |       |              |              |       |       |
|---|------|-------|--------------|--------------|-------|-------|
| 0 | 0.98 | 0.102 | 0.726(14004) | 0.724(16757) | 0.031 | 0.019 |
|---|------|-------|--------------|--------------|-------|-------|

PGC\_SCZ wave2 only

|   |      |          |              |             |       |       |
|---|------|----------|--------------|-------------|-------|-------|
| 0 | 0.99 | 4.55e-05 | 0.584(34850) | 0.57(44347) | 0.045 | 0.011 |
|---|------|----------|--------------|-------------|-------|-------|

PGC\_SCZ wave3 (excl. wave2)

|   |      |          |              |              |       |       |
|---|------|----------|--------------|--------------|-------|-------|
| 0 | 0.99 | 1.78e-05 | 0.629(32540) | 0.612(49668) | 0.049 | 0.011 |
|---|------|----------|--------------|--------------|-------|-------|

**PGC\_SCZ wave3 (incl. wave2)**

|          |             |                 |                     |                     |              |              |
|----------|-------------|-----------------|---------------------|---------------------|--------------|--------------|
| <b>0</b> | <b>0.99</b> | <b>3.35e-09</b> | <b>0.606(67390)</b> | <b>0.592(94015)</b> | <b>0.047</b> | <b>0.008</b> |
|----------|-------------|-----------------|---------------------|---------------------|--------------|--------------|

Decode – Replication

|   |      |       |             |               |       |       |
|---|------|-------|-------------|---------------|-------|-------|
| 0 | 1.00 | 0.969 | 0.563(1979) | 0.562(142627) | 0.049 | 0.039 |
|---|------|-------|-------------|---------------|-------|-------|

**PGC\_SCZ wave3 (incl. wave2 and replication)**

|          |             |                |                     |                      |              |              |
|----------|-------------|----------------|---------------------|----------------------|--------------|--------------|
| <b>0</b> | <b>1.00</b> | <b>6.3e-09</b> | <b>0.605(69369)</b> | <b>0.574(236642)</b> | <b>0.045</b> | <b>0.008</b> |
|----------|-------------|----------------|---------------------|----------------------|--------------|--------------|

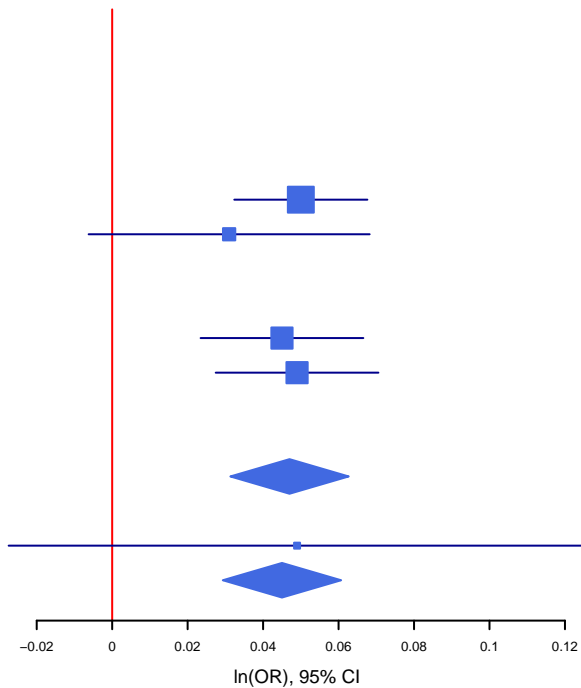

rs35792732

C/T

7:132929804

—

het\_P:

0.859

het\_I:

0.0

|  | ngt | info | p_value | f_ca(n) | f_co(n) | ln(OR) | STDerr |
|--|-----|------|---------|---------|---------|--------|--------|
|--|-----|------|---------|---------|---------|--------|--------|

|                        |   |      |         |              |              |      |       |
|------------------------|---|------|---------|--------------|--------------|------|-------|
| PGC_SCZ wave3 eur only | 0 | 0.95 | 5.3e-08 | 0.805(53386) | 0.795(77258) | 0.06 | 0.011 |
|------------------------|---|------|---------|--------------|--------------|------|-------|

|                        |   |      |        |              |              |       |       |
|------------------------|---|------|--------|--------------|--------------|-------|-------|
| PGC_SCZ wave3 asn only | 0 | 0.78 | 0.0784 | 0.922(14004) | 0.919(16757) | 0.062 | 0.036 |
|------------------------|---|------|--------|--------------|--------------|-------|-------|

|                    |   |      |          |              |              |       |       |
|--------------------|---|------|----------|--------------|--------------|-------|-------|
| PGC_SCZ wave2 only | 0 | 0.95 | 3.02e-05 | 0.811(34850) | 0.798(44347) | 0.059 | 0.014 |
|--------------------|---|------|----------|--------------|--------------|-------|-------|

|                             |   |      |          |              |              |       |       |
|-----------------------------|---|------|----------|--------------|--------------|-------|-------|
| PGC_SCZ wave3 (excl. wave2) | 0 | 0.89 | 9.08e-05 | 0.848(32540) | 0.834(49668) | 0.062 | 0.016 |
|-----------------------------|---|------|----------|--------------|--------------|-------|-------|

|                                    |          |             |                 |                     |                     |             |              |
|------------------------------------|----------|-------------|-----------------|---------------------|---------------------|-------------|--------------|
| <b>PGC_SCZ wave3 (incl. wave2)</b> | <b>0</b> | <b>0.92</b> | <b>1.08e-08</b> | <b>0.829(67390)</b> | <b>0.817(94015)</b> | <b>0.06</b> | <b>0.011</b> |
|------------------------------------|----------|-------------|-----------------|---------------------|---------------------|-------------|--------------|

|                      |   |      |       |             |               |       |       |
|----------------------|---|------|-------|-------------|---------------|-------|-------|
| Decode – Replication | 0 | 1.00 | 0.272 | 0.795(1979) | 0.776(142627) | 0.062 | 0.047 |
|----------------------|---|------|-------|-------------|---------------|-------|-------|

|                                                    |          |             |                 |                     |                      |             |             |
|----------------------------------------------------|----------|-------------|-----------------|---------------------|----------------------|-------------|-------------|
| <b>PGC_SCZ wave3 (incl. wave2 and replication)</b> | <b>0</b> | <b>0.97</b> | <b>6.65e-09</b> | <b>0.828(69369)</b> | <b>0.792(236642)</b> | <b>0.06</b> | <b>0.01</b> |
|----------------------------------------------------|----------|-------------|-----------------|---------------------|----------------------|-------------|-------------|

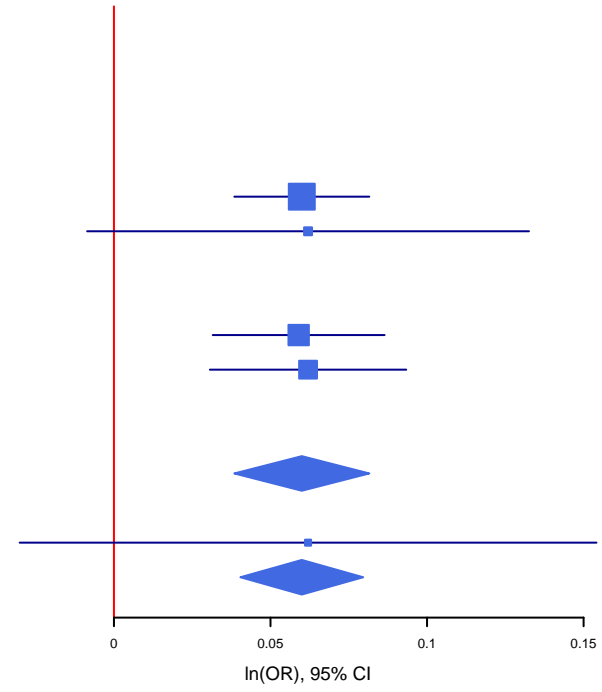

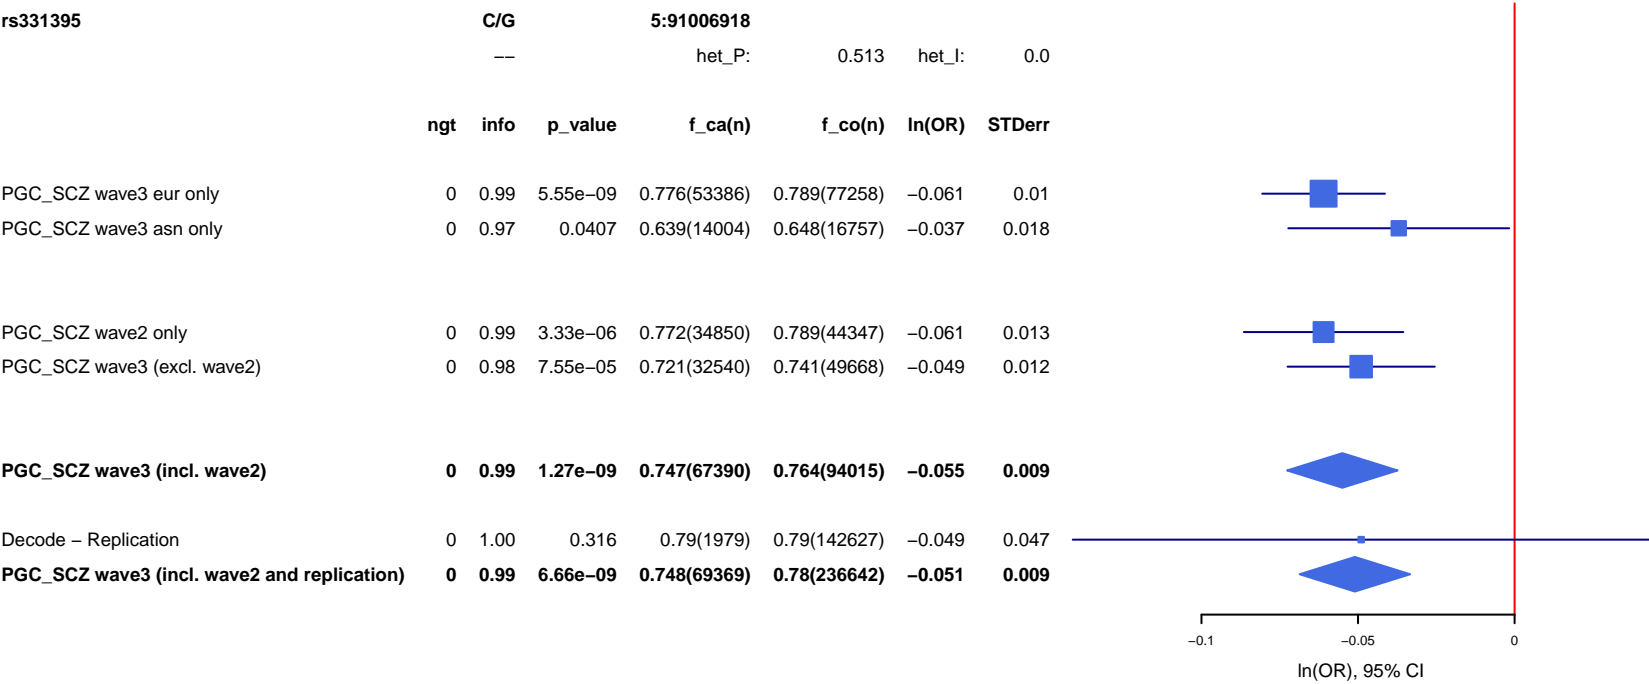

rs2224086

C/A  
++                    1:115309590  
                              het\_P:            0.89    het\_I:        0.0

|                                             | ngt | info | p_value  | f_ca(n)      | f_co(n)      | ln(OR) | STDerr |
|---------------------------------------------|-----|------|----------|--------------|--------------|--------|--------|
| PGC_SCZ wave3 eur only                      | 0   | 0.95 | 8.83e-08 | 0.23(53386)  | 0.24(77258)  | -0.056 | 0.01   |
| PGC_SCZ wave3 asn only                      | 0   | 0.47 | 0.0441   | 0.038(14004) | 0.039(16757) | -0.128 | 0.064  |
| PGC_SCZ wave2 only                          | 0   | 0.94 | 2.25e-05 | 0.219(34850) | 0.233(44347) | -0.056 | 0.013  |
| PGC_SCZ wave3 (excl. wave2)                 | 0   | 0.79 | 0.000244 | 0.159(32540) | 0.177(49668) | -0.059 | 0.016  |
| PGC_SCZ wave3 (incl. wave2)                 | 0   | 0.86 | 2.09e-08 | 0.19(67390)  | 0.204(94015) | -0.058 | 0.01   |
| Decode – Replication                        | 0   | 0.85 | 0.0824   | 0.326(1052)  | 0.326(1399)  | -0.059 | 0.07   |
| PGC_SCZ wave3 (incl. wave2 and replication) | 0   | 0.86 | 6.78e-09 | 0.192(68442) | 0.206(95414) | -0.059 | 0.01   |

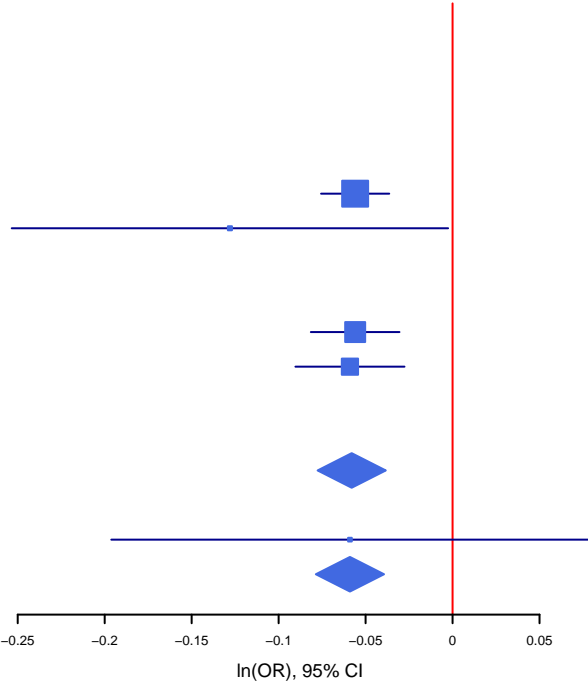

rs459391

T/C

21:22120508

++

het\_P:

0.391

het\_I:

0.0

| ngt | info | p_value | f_ca(n) | f_co(n) | ln(OR) | STDerr |
|-----|------|---------|---------|---------|--------|--------|
|-----|------|---------|---------|---------|--------|--------|

PGC\_SCZ wave3 eur only

|   |      |          |              |              |       |       |
|---|------|----------|--------------|--------------|-------|-------|
| 0 | 0.99 | 1.29e-06 | 0.213(53386) | 0.209(77258) | 0.051 | 0.011 |
|---|------|----------|--------------|--------------|-------|-------|

PGC\_SCZ wave3 asn only

|   |      |          |              |              |       |       |
|---|------|----------|--------------|--------------|-------|-------|
| 0 | 0.97 | 0.000851 | 0.086(14004) | 0.079(16757) | 0.104 | 0.031 |
|---|------|----------|--------------|--------------|-------|-------|

PGC\_SCZ wave2 only

|   |      |          |              |             |       |       |
|---|------|----------|--------------|-------------|-------|-------|
| 0 | 0.99 | 0.000249 | 0.209(34850) | 0.21(44347) | 0.049 | 0.013 |
|---|------|----------|--------------|-------------|-------|-------|

PGC\_SCZ wave3 (excl. wave2)

|   |      |         |              |              |       |       |
|---|------|---------|--------------|--------------|-------|-------|
| 0 | 0.99 | 1.1e-05 | 0.163(32540) | 0.164(49668) | 0.066 | 0.015 |
|---|------|---------|--------------|--------------|-------|-------|

**PGC\_SCZ wave3 (incl. wave2)**

|          |             |                 |                     |                     |              |             |
|----------|-------------|-----------------|---------------------|---------------------|--------------|-------------|
| <b>0</b> | <b>0.99</b> | <b>1.54e-08</b> | <b>0.187(67390)</b> | <b>0.185(94015)</b> | <b>0.057</b> | <b>0.01</b> |
|----------|-------------|-----------------|---------------------|---------------------|--------------|-------------|

Decode – Replication

|   |      |       |             |               |       |       |
|---|------|-------|-------------|---------------|-------|-------|
| 0 | 1.00 | 0.235 | 0.233(1979) | 0.267(142627) | 0.066 | 0.043 |
|---|------|-------|-------------|---------------|-------|-------|

**PGC\_SCZ wave3 (incl. wave2 and replication)**

|          |             |                 |                     |                      |              |             |
|----------|-------------|-----------------|---------------------|----------------------|--------------|-------------|
| <b>0</b> | <b>1.00</b> | <b>7.38e-09</b> | <b>0.188(69369)</b> | <b>0.234(236642)</b> | <b>0.056</b> | <b>0.01</b> |
|----------|-------------|-----------------|---------------------|----------------------|--------------|-------------|

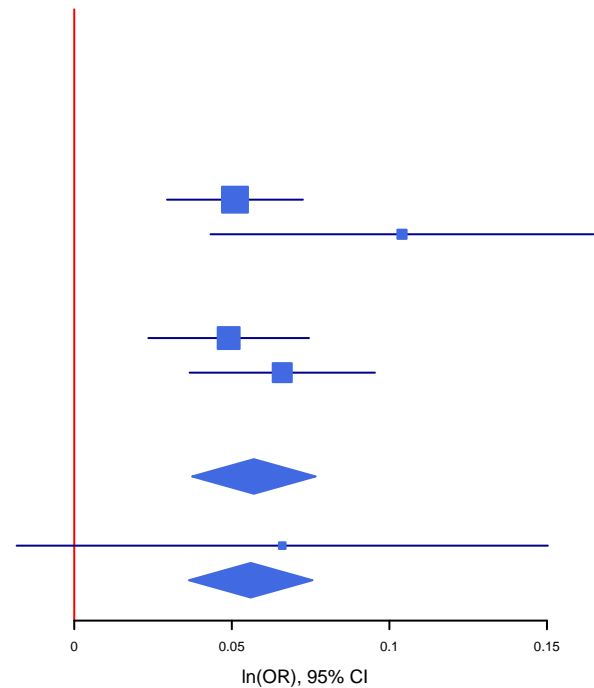

rs215483

G/A

4:23377121

++

het\_P:

0.071

het\_I:

69.3

| ngt | info | p_value | f_ca(n) | f_co(n) | ln(OR) | STDerr |
|-----|------|---------|---------|---------|--------|--------|
|-----|------|---------|---------|---------|--------|--------|

PGC\_SCZ wave3 eur only

|   |      |         |              |              |        |       |
|---|------|---------|--------------|--------------|--------|-------|
| 0 | 0.99 | 1.5e-09 | 0.654(53386) | 0.665(77258) | -0.055 | 0.009 |
|---|------|---------|--------------|--------------|--------|-------|

PGC\_SCZ wave3 asn only

|   |      |       |              |              |        |       |
|---|------|-------|--------------|--------------|--------|-------|
| 0 | 0.96 | 0.238 | 0.804(14004) | 0.809(16757) | -0.026 | 0.022 |
|---|------|-------|--------------|--------------|--------|-------|

PGC\_SCZ wave2 only

|   |      |          |              |              |        |       |
|---|------|----------|--------------|--------------|--------|-------|
| 0 | 0.99 | 1.68e-08 | 0.657(34850) | 0.665(44347) | -0.065 | 0.012 |
|---|------|----------|--------------|--------------|--------|-------|

PGC\_SCZ wave3 (excl. wave2)

|   |      |         |              |              |        |       |
|---|------|---------|--------------|--------------|--------|-------|
| 0 | 0.98 | 0.00513 | 0.715(32540) | 0.713(49668) | -0.034 | 0.012 |
|---|------|---------|--------------|--------------|--------|-------|

**PGC\_SCZ wave3 (incl. wave2)**

|          |             |                 |                     |                     |               |              |
|----------|-------------|-----------------|---------------------|---------------------|---------------|--------------|
| <b>0</b> | <b>0.98</b> | <b>1.59e-09</b> | <b>0.685(67390)</b> | <b>0.691(94015)</b> | <b>-0.051</b> | <b>0.008</b> |
|----------|-------------|-----------------|---------------------|---------------------|---------------|--------------|

Decode - Replication

|   |      |       |             |               |        |       |
|---|------|-------|-------------|---------------|--------|-------|
| 0 | 1.00 | 0.535 | 0.646(1979) | 0.639(142627) | -0.034 | 0.039 |
|---|------|-------|-------------|---------------|--------|-------|

**PGC\_SCZ wave3 (incl. wave2 and replication)**

|          |             |                 |                     |                      |               |              |
|----------|-------------|-----------------|---------------------|----------------------|---------------|--------------|
| <b>0</b> | <b>0.99</b> | <b>7.81e-09</b> | <b>0.684(69369)</b> | <b>0.659(236642)</b> | <b>-0.047</b> | <b>0.008</b> |
|----------|-------------|-----------------|---------------------|----------------------|---------------|--------------|

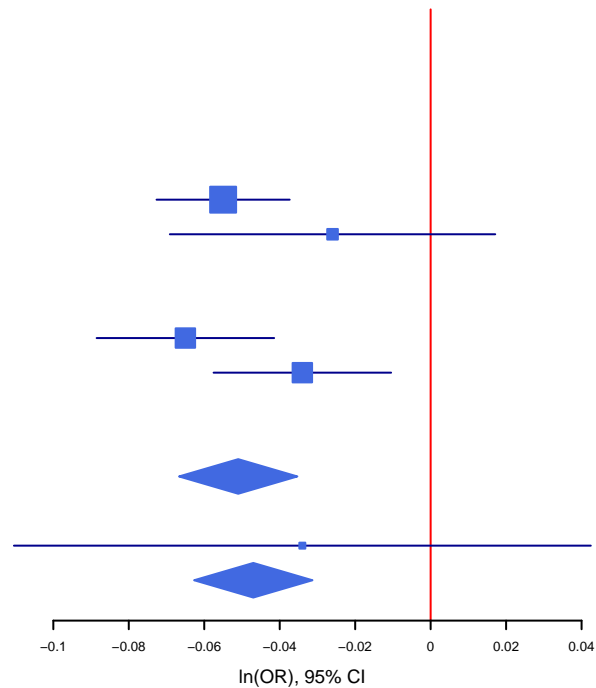

|                                                    |           |             |                 |                     |                      |              |              |
|----------------------------------------------------|-----------|-------------|-----------------|---------------------|----------------------|--------------|--------------|
| rs4674015                                          | A/G       |             | 2:201254171     |                     |                      |              |              |
|                                                    | ++        |             | het_P:          |                     | 0.171                | het_I:       | 46.5         |
|                                                    | ngt       | info        | p_value         | f_ca(n)             | f_co(n)              | ln(OR)       | STDerr       |
| PGC_SCZ wave3 eur only                             | 27        | 0.95        | 1.28e-06        | 0.303(53386)        | 0.294(77258)         | 0.047        | 0.01         |
| PGC_SCZ wave3 asn only                             | 8         | 0.91        | 0.0146          | 0.331(14004)        | 0.322(16757)         | 0.046        | 0.019        |
| PGC_SCZ wave2 only                                 | 24        | 0.97        | 0.00368         | 0.302(34850)        | 0.294(44347)         | 0.035        | 0.012        |
| PGC_SCZ wave3 (excl. wave2)                        | 11        | 0.93        | 1.74e-06        | 0.315(32540)        | 0.304(49668)         | 0.059        | 0.012        |
| <b>PGC_SCZ wave3 (incl. wave2)</b>                 | <b>35</b> | <b>0.95</b> | <b>5.84e-08</b> | <b>0.308(67390)</b> | <b>0.299(94015)</b>  | <b>0.047</b> | <b>0.009</b> |
| Decode – Replication                               | 0         | 1.00        | 0.022           | 0.301(1979)         | 0.31(142627)         | 0.059        | 0.042        |
| <b>PGC_SCZ wave3 (incl. wave2 and replication)</b> | <b>35</b> | <b>0.98</b> | <b>7.94e-09</b> | <b>0.308(69369)</b> | <b>0.305(236642)</b> | <b>0.049</b> | <b>0.008</b> |

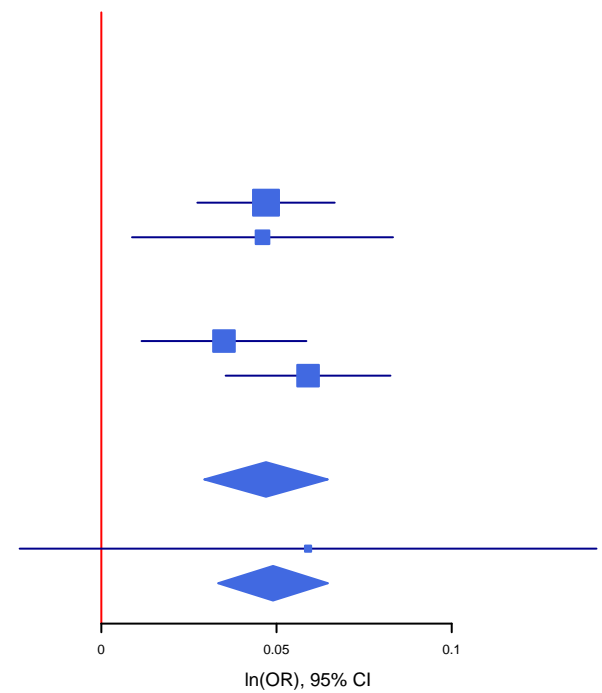



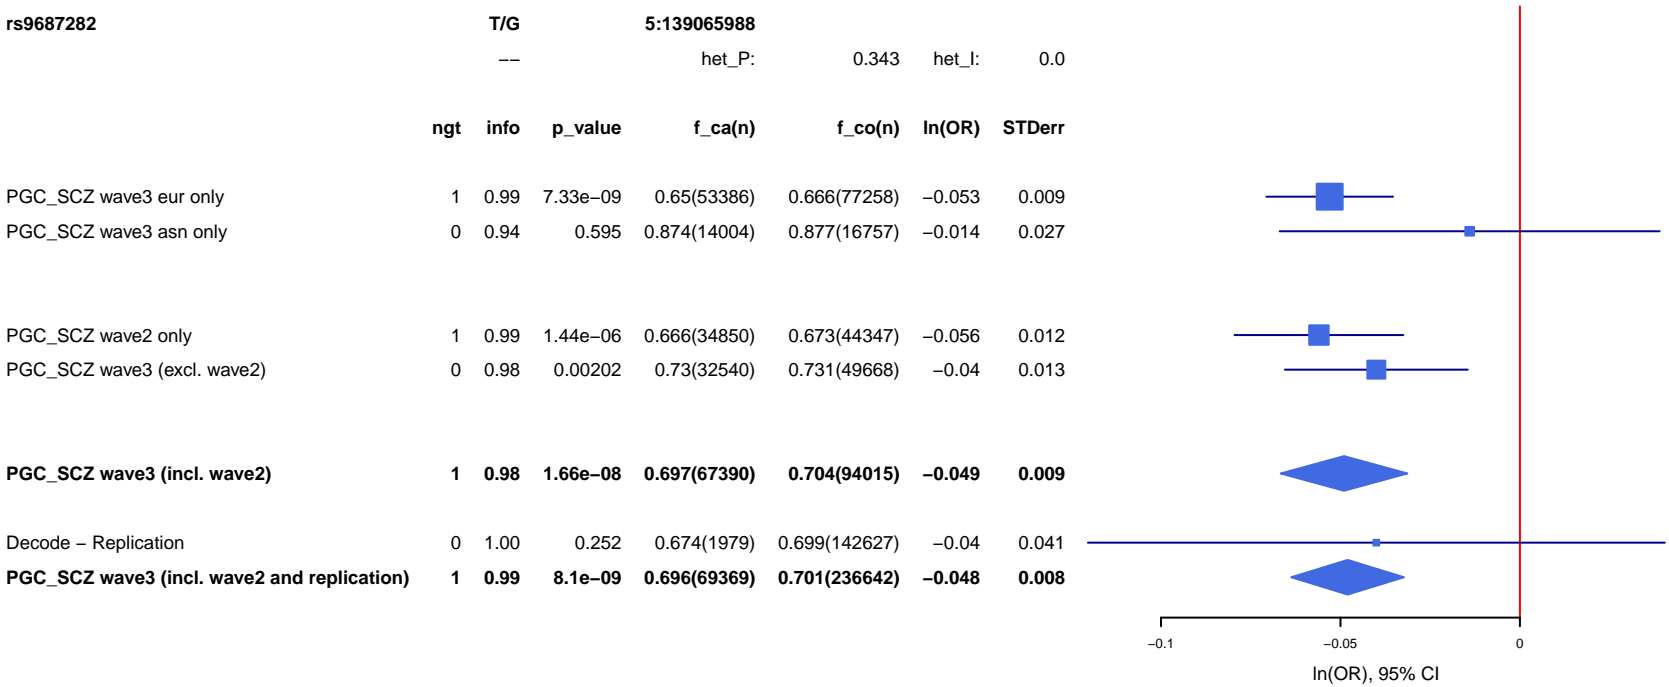

rs56040937

C/T  
++  
18:77541421  
het\_P: 0.405  
het\_I: 0.0

|                        | ngt | info | p_value  | f_ca(n)      | f_co(n)      | ln(OR) | STDerr |
|------------------------|-----|------|----------|--------------|--------------|--------|--------|
| PGC_SCZ wave3 eur only | 0   | 0.85 | 1.41e-08 | 0.904(53386) | 0.908(77258) | -0.09  | 0.016  |
| PGC_SCZ wave3 asn only | nan | nan  | nan      | nan(nan)     | nan(nan)     | nan    | nan    |

|                             |   |      |          |              |              |        |       |
|-----------------------------|---|------|----------|--------------|--------------|--------|-------|
| PGC_SCZ wave2 only          | 0 | 0.88 | 4.94e-05 | 0.902(32998) | 0.907(43387) | -0.081 | 0.02  |
| PGC_SCZ wave3 (excl. wave2) | 0 | 0.72 | 3.12e-05 | 0.924(26368) | 0.923(41373) | -0.109 | 0.026 |

**PGC\_SCZ wave3 (incl. wave2)**      **0   0.80   8.68e-09   0.912(59366)   0.915(84760)   -0.091   0.016**

Decode – Replication      0   1.00   0.492   0.927(1979)   0.914(142627)   -0.109   0.072

**PGC\_SCZ wave3 (incl. wave2 and replication)**      **0   0.92   8.35e-09   0.912(61345)   0.914(227387)   -0.089   0.016**

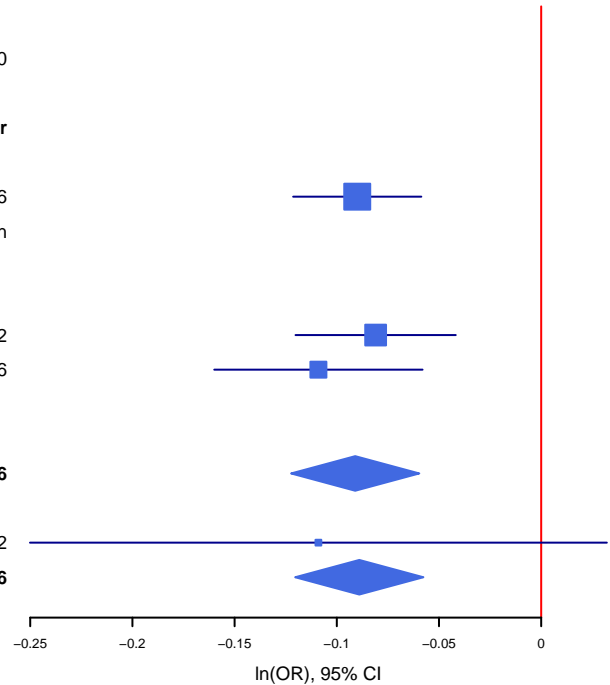

| rs11122119                                         | C/A       |             | 1:6768856       |                     |                      |               |              |
|----------------------------------------------------|-----------|-------------|-----------------|---------------------|----------------------|---------------|--------------|
|                                                    | ++        |             | het_P:          | 0.693               | het_I:               | 0.0           |              |
|                                                    | ngt       | info        | p_value         | f_ca(n)             | f_co(n)              | ln(OR)        | STDerr       |
| PGC_SCZ wave3 eur only                             | 33        | 0.99        | 5.15e-08        | 0.665(53386)        | 0.676(77258)         | -0.05         | 0.009        |
| PGC_SCZ wave3 asn only                             | 7         | 0.98        | 0.0972          | 0.548(14004)        | 0.555(16757)         | -0.029        | 0.017        |
| PGC_SCZ wave2 only                                 | 30        | 1.00        | 2.46e-05        | 0.66(34850)         | 0.676(44347)         | -0.048        | 0.012        |
| PGC_SCZ wave3 (excl. wave2)                        | 10        | 0.98        | 0.000229        | 0.62(32540)         | 0.635(49668)         | -0.042        | 0.011        |
| <b>PGC_SCZ wave3 (incl. wave2)</b>                 | <b>40</b> | <b>0.99</b> | <b>2.31e-08</b> | <b>0.641(67390)</b> | <b>0.655(94015)</b>  | <b>-0.045</b> | <b>0.008</b> |
| Decode – Replication                               | 0         | 1.00        | 0.161           | 0.669(1979)         | 0.649(142627)        | -0.042        | 0.041        |
| <b>PGC_SCZ wave3 (incl. wave2 and replication)</b> | <b>40</b> | <b>1.00</b> | <b>8.49e-09</b> | <b>0.642(69369)</b> | <b>0.651(236642)</b> | <b>-0.046</b> | <b>0.008</b> |

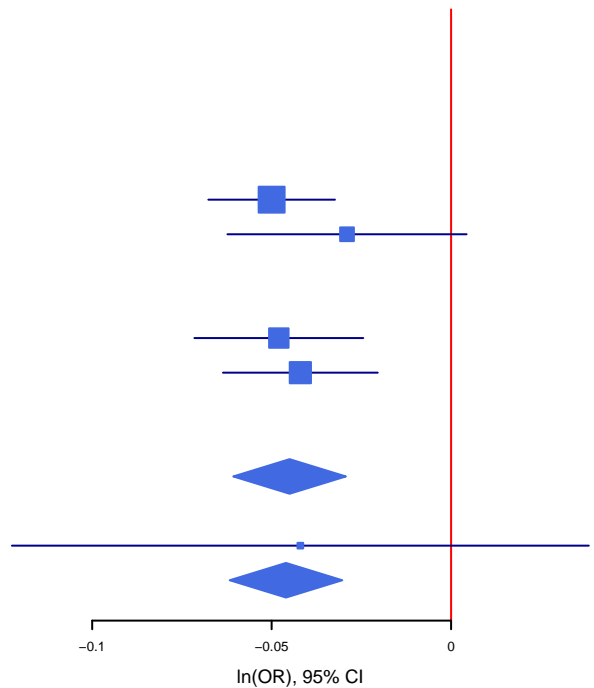

rs77463171

|     |                         |
|-----|-------------------------|
| C/T | 16:66942206             |
| ++  | het_P: 0.732 het_I: 0.0 |

|                                             | ngt | info | p_value  | f_ca(n)      | f_co(n)       | ln(OR) | STDerr |
|---------------------------------------------|-----|------|----------|--------------|---------------|--------|--------|
| PGC_SCZ wave3 eur only                      | 0   | 0.99 | 0.000268 | 0.981(52170) | 0.982(73446)  | -0.119 | 0.033  |
| PGC_SCZ wave3 asn only                      | 0   | 0.96 | 8.54e-06 | 0.955(14004) | 0.964(16757)  | -0.196 | 0.044  |
| PGC_SCZ wave2 only                          | 0   | 0.99 | 0.001    | 0.98(33696)  | 0.983(40789)  | -0.136 | 0.041  |
| PGC_SCZ wave3 (excl. wave2)                 | 0   | 0.98 | 6.2e-06  | 0.971(32478) | 0.976(49414)  | -0.154 | 0.034  |
| PGC_SCZ wave3 (incl. wave2)                 | 0   | 0.99 | 2.41e-08 | 0.975(66174) | 0.979(90203)  | -0.146 | 0.026  |
| Decode - Replication                        | 0   | 1.00 | 0.127    | 0.984(1979)  | 0.982(142627) | -0.154 | 0.143  |
| PGC_SCZ wave3 (incl. wave2 and replication) | 0   | 0.99 | 8.69e-09 | 0.975(68153) | 0.981(232830) | -0.149 | 0.026  |

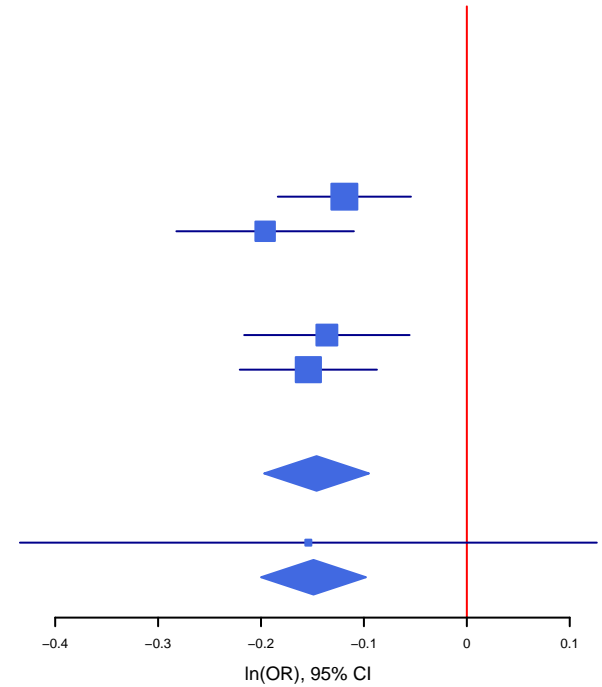

|                                                    |            |             |                 |            |                     |                      |               |               |     |  |  |
|----------------------------------------------------|------------|-------------|-----------------|------------|---------------------|----------------------|---------------|---------------|-----|--|--|
| <b>rs1348129</b>                                   |            |             |                 | <b>G/A</b> |                     | <b>1:163763163</b>   |               |               |     |  |  |
|                                                    |            |             |                 | --         |                     | het_P:               | 0.533         | het_I:        | 0.0 |  |  |
|                                                    | <b>ngt</b> | <b>info</b> | <b>p_value</b>  |            | <b>f_ca(n)</b>      | <b>f_co(n)</b>       | <b>ln(OR)</b> | <b>STDerr</b> |     |  |  |
| PGC_SCZ wave3 eur only                             | 0          | 0.98        | 1.03e-07        |            | 0.47(53386)         | 0.456(77258)         | 0.046         | 0.009         |     |  |  |
| PGC_SCZ wave3 asn only                             | 0          | 0.67        | 0.283           |            | 0.086(11065)        | 0.08(12317)          | 0.055         | 0.051         |     |  |  |
| PGC_SCZ wave2 only                                 | 0          | 0.99        | 4.43e-06        |            | 0.444(34850)        | 0.443(44347)         | 0.051         | 0.011         |     |  |  |
| PGC_SCZ wave3 (excl. wave2)                        | 0          | 0.89        | 0.00308         |            | 0.357(29601)        | 0.366(45228)         | 0.04          | 0.014         |     |  |  |
| <b>PGC_SCZ wave3 (incl. wave2)</b>                 | <b>0</b>   | <b>0.94</b> | <b>5.76e-08</b> |            | <b>0.404(64451)</b> | <b>0.404(89575)</b>  | <b>0.047</b>  | <b>0.009</b>  |     |  |  |
| Decode - Replication                               | 0          | 1.00        | 0.0352          |            | 0.462(1979)         | 0.439(142627)        | 0.04          | 0.038         |     |  |  |
| <b>PGC_SCZ wave3 (incl. wave2 and replication)</b> | <b>0</b>   | <b>0.98</b> | <b>8.86e-09</b> |            | <b>0.406(66430)</b> | <b>0.426(232202)</b> | <b>0.048</b>  | <b>0.008</b>  |     |  |  |

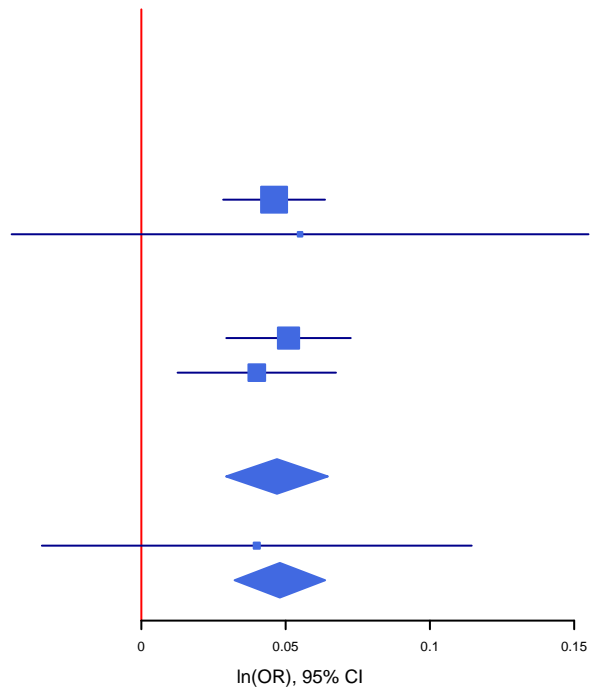

| rs9287971                                   | G/A |      |          | 2:174931752  |               |        |        |     |
|---------------------------------------------|-----|------|----------|--------------|---------------|--------|--------|-----|
|                                             | ++  |      |          | het_P:       |               | 0.99   | het_L: | 0.0 |
|                                             | ngt | info | p_value  | f_ca(n)      | f_co(n)       | ln(OR) | STDerr |     |
| PGC_SCZ wave3 eur only                      | 65  | 0.99 | 8.83e-07 | 0.661(53386) | 0.674(77258)  | -0.045 | 0.009  |     |
| PGC_SCZ wave3 asn only                      | 4   | 0.90 | 0.0135   | 0.301(14004) | 0.302(16757)  | -0.049 | 0.02   |     |
| PGC_SCZ wave2 only                          | 29  | 0.99 | 8.05e-05 | 0.644(34850) | 0.668(44347)  | -0.046 | 0.012  |     |
| PGC_SCZ wave3 (excl. wave2)                 | 40  | 0.97 | 0.000127 | 0.525(32540) | 0.553(49668)  | -0.046 | 0.012  |     |
| PGC_SCZ wave3 (incl. wave2)                 | 69  | 0.98 | 3.82e-08 | 0.587(67390) | 0.607(94015)  | -0.046 | 0.008  |     |
| Decode – Replication                        | 0   | 1.00 | 0.0856   | 0.666(1979)  | 0.725(142627) | -0.046 | 0.041  |     |
| PGC_SCZ wave3 (incl. wave2 and replication) | 69  | 0.99 | 8.87e-09 | 0.589(69369) | 0.678(236642) | -0.047 | 0.008  |     |

rs10238960

|     |                            |
|-----|----------------------------|
| C/T | 7:70773271                 |
| ++  | het_P: 0.11    het_I: 60.9 |

|                                             | ngt | info | p_value  | f_ca(n)      | f_co(n)       | ln(OR) | STDerr |
|---------------------------------------------|-----|------|----------|--------------|---------------|--------|--------|
| PGC_SCZ wave3 eur only                      | 0   | 1.00 | 4.75e-05 | 0.279(53386) | 0.288(77258)  | -0.039 | 0.01   |
| PGC_SCZ wave3 asn only                      | 0   | 0.99 | 4.82e-06 | 0.44(14004)  | 0.465(16757)  | -0.079 | 0.017  |
| PGC_SCZ wave2 only                          | 0   | 1.00 | 0.00398  | 0.287(34850) | 0.289(44347)  | -0.034 | 0.012  |
| PGC_SCZ wave3 (excl. wave2)                 | 0   | 0.99 | 1.46e-07 | 0.339(32540) | 0.346(49668)  | -0.061 | 0.012  |
| PGC_SCZ wave3 (incl. wave2)                 | 0   | 0.99 | 7.65e-09 | 0.312(67390) | 0.319(94015)  | -0.048 | 0.008  |
| Decode - Replication                        | 0   | 1.00 | 0.536    | 0.284(1979)  | 0.297(142627) | -0.061 | 0.043  |
| PGC_SCZ wave3 (incl. wave2 and replication) | 0   | 1.00 | 8.9e-09  | 0.311(69369) | 0.306(236642) | -0.047 | 0.008  |

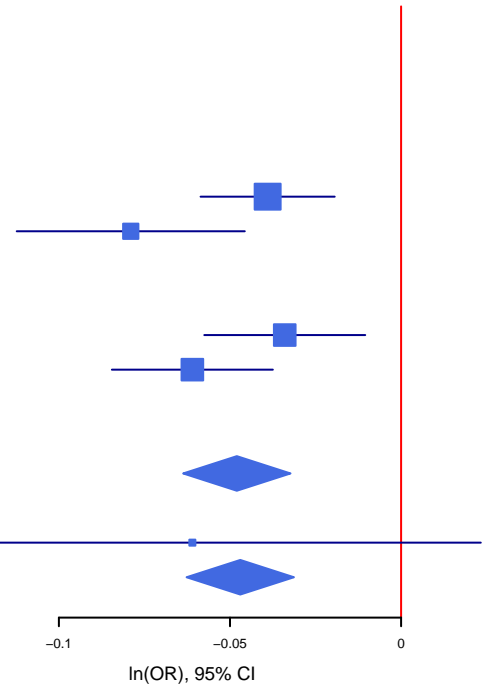

rs6919146

|     |                            |
|-----|----------------------------|
| T/G | 6:165059966                |
| --- | het_P: 0.764    het_I: 0.0 |

|                                             | ngt | info | p_value  | f_ca(n)      | f_co(n)       | ln(OR) | STDerr |
|---------------------------------------------|-----|------|----------|--------------|---------------|--------|--------|
| PGC_SCZ wave3 eur only                      | 50  | 0.99 | 6.08e-06 | 0.335(53386) | 0.341(77258)  | -0.041 | 0.009  |
| PGC_SCZ wave3 asn only                      | 6   | 0.90 | 3.32e-05 | 0.195(14004) | 0.206(16757)  | -0.093 | 0.022  |
| PGC_SCZ wave2 only                          | 14  | 0.98 | 7.13e-05 | 0.325(34850) | 0.335(44347)  | -0.046 | 0.012  |
| PGC_SCZ wave3 (excl. wave2)                 | 42  | 0.97 | 2.89e-05 | 0.287(32540) | 0.3(49668)    | -0.052 | 0.012  |
| PGC_SCZ wave3 (incl. wave2)                 | 56  | 0.97 | 8.42e-09 | 0.306(67390) | 0.317(94015)  | -0.049 | 0.008  |
| Decode - Replication                        | 0   | 1.00 | 0.535    | 0.33(1979)   | 0.314(142627) | -0.052 | 0.041  |
| PGC_SCZ wave3 (incl. wave2 and replication) | 56  | 0.99 | 9.09e-09 | 0.307(69369) | 0.315(236642) | -0.048 | 0.008  |

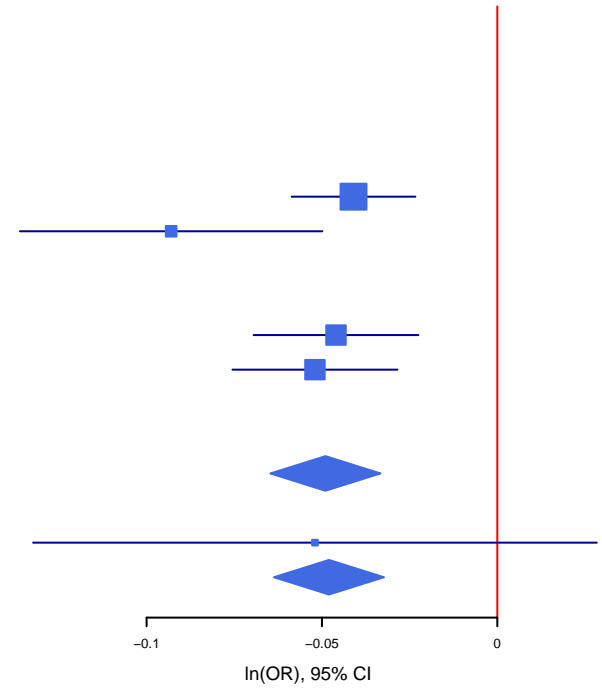



rs220515

T/A

20:37283506

++

het\_P:

0.918

het\_I:

0.0

| ngt | info | p_value | f_ca(n) | f_co(n) | ln(OR) | STDerr |
|-----|------|---------|---------|---------|--------|--------|
|-----|------|---------|---------|---------|--------|--------|

PGC\_SCZ wave3 eur only

|   |      |         |              |              |       |       |
|---|------|---------|--------------|--------------|-------|-------|
| 0 | 0.99 | 5.5e-06 | 0.428(53386) | 0.433(77258) | -0.04 | 0.009 |
|---|------|---------|--------------|--------------|-------|-------|

PGC\_SCZ wave3 asn only

|   |      |         |              |             |        |       |
|---|------|---------|--------------|-------------|--------|-------|
| 0 | 0.99 | 0.00486 | 0.407(14004) | 0.42(16757) | -0.049 | 0.017 |
|---|------|---------|--------------|-------------|--------|-------|

PGC\_SCZ wave2 only

|   |      |          |              |              |        |       |
|---|------|----------|--------------|--------------|--------|-------|
| 0 | 1.00 | 0.000216 | 0.422(34850) | 0.427(44347) | -0.041 | 0.011 |
|---|------|----------|--------------|--------------|--------|-------|

PGC\_SCZ wave3 (excl. wave2)

|   |      |          |              |              |        |       |
|---|------|----------|--------------|--------------|--------|-------|
| 0 | 0.99 | 0.000127 | 0.426(32540) | 0.434(49668) | -0.042 | 0.011 |
|---|------|----------|--------------|--------------|--------|-------|

**PGC\_SCZ wave3 (incl. wave2)**

|          |             |                 |                     |                     |               |              |
|----------|-------------|-----------------|---------------------|---------------------|---------------|--------------|
| <b>0</b> | <b>0.99</b> | <b>1.01e-07</b> | <b>0.424(67390)</b> | <b>0.431(94015)</b> | <b>-0.041</b> | <b>0.008</b> |
|----------|-------------|-----------------|---------------------|---------------------|---------------|--------------|

Decode - Replication

|   |      |         |             |               |        |       |
|---|------|---------|-------------|---------------|--------|-------|
| 0 | 1.00 | 0.00777 | 0.426(1979) | 0.403(142627) | -0.042 | 0.039 |
|---|------|---------|-------------|---------------|--------|-------|

**PGC\_SCZ wave3 (incl. wave2 and replication)**

|          |             |                 |                     |                      |               |              |
|----------|-------------|-----------------|---------------------|----------------------|---------------|--------------|
| <b>0</b> | <b>1.00</b> | <b>9.43e-09</b> | <b>0.424(69369)</b> | <b>0.414(236642)</b> | <b>-0.044</b> | <b>0.008</b> |
|----------|-------------|-----------------|---------------------|----------------------|---------------|--------------|

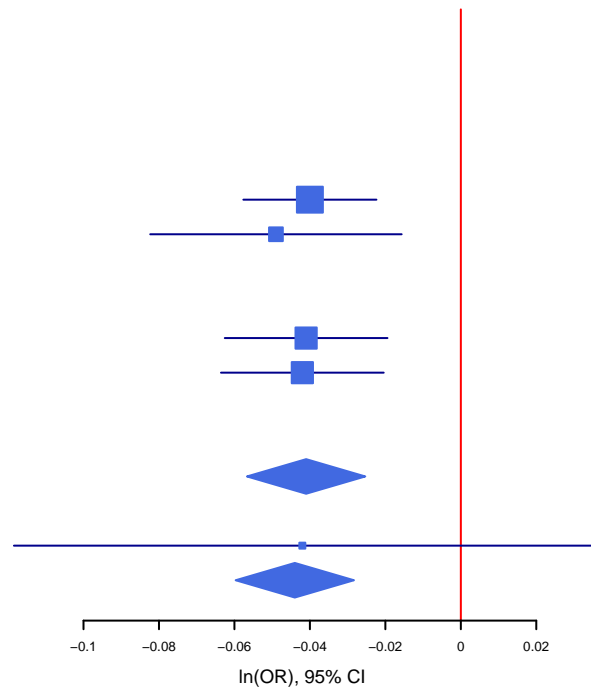

rs6479487

|     |                         |
|-----|-------------------------|
| T/G | 9:96237373              |
| --- | het_P: 0.954 het_I: 0.0 |

|                                             | ngt | info | p_value  | f_ca(n)      | f_co(n)       | ln(OR) | STDerr |
|---------------------------------------------|-----|------|----------|--------------|---------------|--------|--------|
| PGC_SCZ wave3 eur only                      | 2   | 1.00 | 1.86e-07 | 0.837(53386) | 0.842(77258)  | -0.061 | 0.012  |
| PGC_SCZ wave3 asn only                      | 0   | 0.99 | 0.022    | 0.813(14004) | 0.819(16757)  | -0.05  | 0.022  |
| PGC_SCZ wave2 only                          | 0   | 0.99 | 5.24e-05 | 0.833(34850) | 0.84(44347)   | -0.059 | 0.015  |
| PGC_SCZ wave3 (excl. wave2)                 | 2   | 1.00 | 6.8e-05  | 0.83(32540)  | 0.836(49668)  | -0.058 | 0.015  |
| PGC_SCZ wave3 (incl. wave2)                 | 2   | 1.00 | 1.37e-08 | 0.832(67390) | 0.838(94015)  | -0.059 | 0.01   |
| Decode - Replication                        | 0   | 1.00 | 0.482    | 0.853(1979)  | 0.837(142627) | -0.058 | 0.053  |
| PGC_SCZ wave3 (incl. wave2 and replication) | 2   | 1.00 | 1.02e-08 | 0.833(69369) | 0.837(236642) | -0.058 | 0.01   |

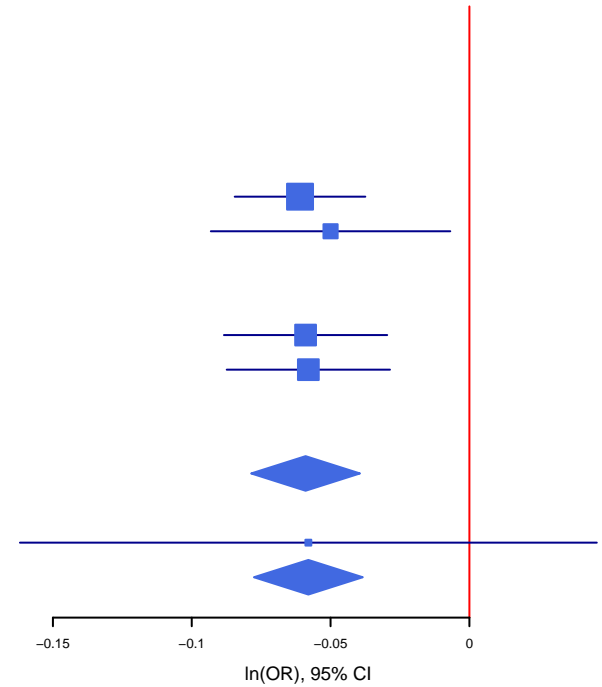

| rs8048039                                          | A/T      |             | 16:4498486      |                     |                      |              |              |
|----------------------------------------------------|----------|-------------|-----------------|---------------------|----------------------|--------------|--------------|
|                                                    | ++       |             | het_P:          | 0.746               | het_I:               | 0.0          |              |
|                                                    | ngt      | info        | p_value         | f_ca(n)             | f_co(n)              | ln(OR)       | STDerr       |
| PGC_SCZ wave3 eur only                             | 0        | 0.96        | 7.48e-07        | 0.344(53386)        | 0.332(77258)         | 0.046        | 0.009        |
| PGC_SCZ wave3 asn only                             | 0        | 0.90        | 0.00123         | 0.361(14004)        | 0.353(16757)         | 0.061        | 0.019        |
| PGC_SCZ wave2 only                                 | 0        | 0.96        | 1.17e-05        | 0.339(34850)        | 0.327(44347)         | 0.052        | 0.012        |
| PGC_SCZ wave3 (excl. wave2)                        | 0        | 0.94        | 8.91e-05        | 0.356(32540)        | 0.343(49668)         | 0.046        | 0.012        |
| <b>PGC_SCZ wave3 (incl. wave2)</b>                 | <b>0</b> | <b>0.95</b> | <b>4.35e-09</b> | <b>0.347(67390)</b> | <b>0.336(94015)</b>  | <b>0.049</b> | <b>0.008</b> |
| Decode – Replication                               | 0        | 1.00        | 0.748           | 0.325(1979)         | 0.329(142627)        | 0.046        | 0.041        |
| <b>PGC_SCZ wave3 (incl. wave2 and replication)</b> | <b>0</b> | <b>0.98</b> | <b>1.05e-08</b> | <b>0.346(69369)</b> | <b>0.332(236642)</b> | <b>0.047</b> | <b>0.008</b> |

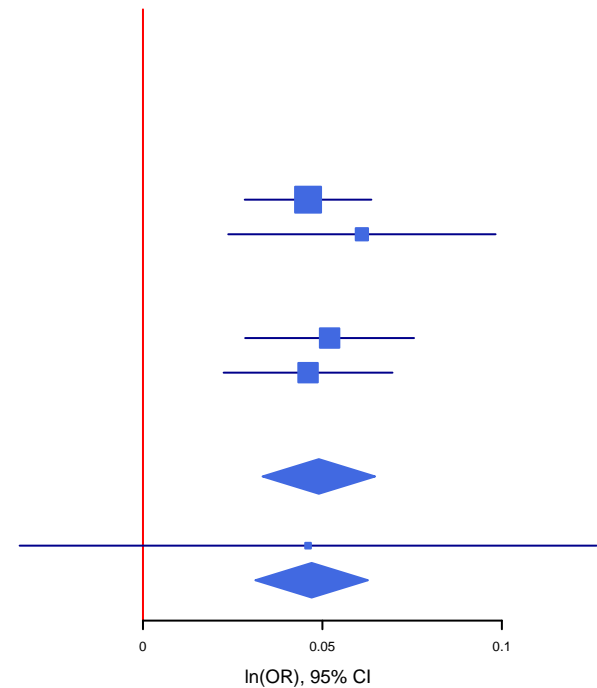

| <b>rs10894308</b>                                  |           | <b>G/A</b>  |                 | <b>11:130891895</b> |                      |              |              |
|----------------------------------------------------|-----------|-------------|-----------------|---------------------|----------------------|--------------|--------------|
|                                                    |           | --          |                 | het_P:              | 0.012                | het_I:       | 84.0         |
|                                                    | ngt       | info        | p_value         | f_ca(n)             | f_co(n)              | ln(OR)       | STDerr       |
| PGC_SCZ wave3 eur only                             | 30        | 0.97        | 8.18e-10        | 0.548(53386)        | 0.535(77258)         | 0.054        | 0.009        |
| PGC_SCZ wave3 asn only                             | 4         | 0.93        | 0.208           | 0.552(14004)        | 0.545(16757)         | 0.022        | 0.018        |
| PGC_SCZ wave2 only                                 | 2         | 0.95        | 1.44e-09        | 0.549(34850)        | 0.533(44347)         | 0.067        | 0.011        |
| PGC_SCZ wave3 (excl. wave2)                        | 32        | 0.97        | 0.0116          | 0.549(32540)        | 0.54(49668)          | 0.028        | 0.011        |
| <b>PGC_SCZ wave3 (incl. wave2)</b>                 | <b>34</b> | <b>0.96</b> | <b>1.36e-09</b> | <b>0.549(67390)</b> | <b>0.537(94015)</b>  | <b>0.048</b> | <b>0.008</b> |
| Decode – Replication                               | 0         | 1.00        | 0.327           | 0.553(1979)         | 0.531(142627)        | 0.028        | 0.038        |
| <b>PGC_SCZ wave3 (incl. wave2 and replication)</b> | <b>34</b> | <b>0.98</b> | <b>1.09e-08</b> | <b>0.549(69369)</b> | <b>0.534(236642)</b> | <b>0.044</b> | <b>0.008</b> |

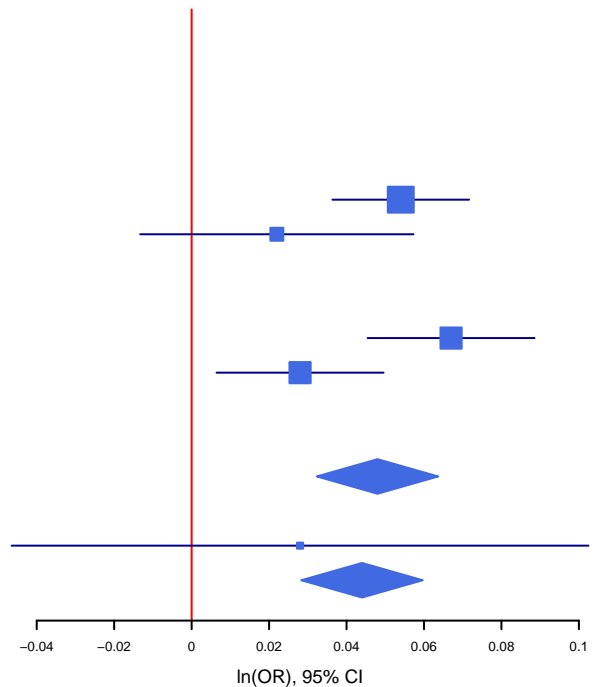

|                                                    |            |             |                 |                     |                     |               |               |
|----------------------------------------------------|------------|-------------|-----------------|---------------------|---------------------|---------------|---------------|
| <b>rs1881046</b>                                   |            | <b>G/T</b>  |                 | <b>2:156835793</b>  |                     |               |               |
|                                                    |            | —           |                 | het_P:              | 0.76                | het_I:        | 0.0           |
|                                                    | <b>ngt</b> | <b>info</b> | <b>p_value</b>  | <b>f_ca(n)</b>      | <b>f_co(n)</b>      | <b>ln(OR)</b> | <b>STDerr</b> |
| PGC_SCZ wave3 eur only                             | 1          | 0.99        | 3.39e-08        | 0.67(53386)         | 0.66(77258)         | 0.051         | 0.009         |
| PGC_SCZ wave3 asn only                             | 0          | 0.94        | 0.271           | 0.593(14004)        | 0.586(16757)        | 0.019         | 0.018         |
| PGC_SCZ wave2 only                                 | 1          | 0.99        | 5.67e-05        | 0.667(34850)        | 0.66(44347)         | 0.047         | 0.012         |
| PGC_SCZ wave3 (excl. wave2)                        | 0          | 0.97        | 0.000293        | 0.64(32540)         | 0.635(49668)        | 0.042         | 0.012         |
| <b>PGC_SCZ wave3 (incl. wave2)</b>                 | <b>1</b>   | <b>0.98</b> | <b>6.42e-08</b> | <b>0.654(67390)</b> | <b>0.647(94015)</b> | <b>0.044</b>  | <b>0.008</b>  |
| Decode – Replication                               | 0          | 1.00        | 0.0473          | 0.667(1979)         | 0.685(142627)       | 0.042         | 0.041         |
| <b>PGC_SCZ wave3 (incl. wave2 and replication)</b> | <b>1</b>   | <b>0.99</b> | <b>1.1e-08</b>  | <b>0.654(69369)</b> | <b>0.67(236642)</b> | <b>0.045</b>  | <b>0.008</b>  |

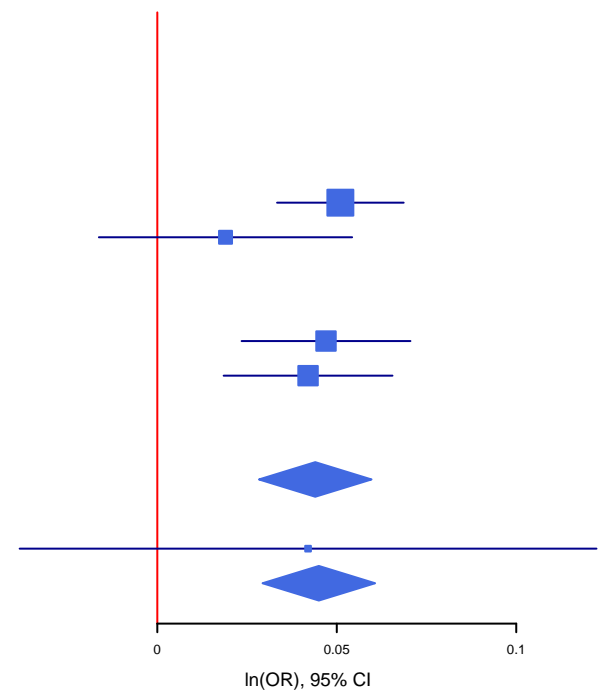

|                                                    |          |             |                 |                     |                      |              |              |
|----------------------------------------------------|----------|-------------|-----------------|---------------------|----------------------|--------------|--------------|
| rs329647                                           | G/C      |             | 11:133764666    |                     |                      |              |              |
|                                                    | ---      |             | het_P:          |                     | 0.279                | het_I:       | 14.6         |
|                                                    | ngt      | info        | p_value         | f_ca(n)             | f_co(n)              | ln(OR)       | STDerr       |
| PGC_SCZ wave3 eur only                             | 0        | 0.99        | 1.32e-08        | 0.312(53386)        | 0.295(77258)         | 0.054        | 0.009        |
| PGC_SCZ wave3 asn only                             | 0        | 0.97        | 0.367           | 0.219(14004)        | 0.216(16757)         | 0.019        | 0.021        |
| PGC_SCZ wave2 only                                 | 0        | 0.99        | 2.19e-06        | 0.301(34850)        | 0.286(44347)         | 0.057        | 0.012        |
| PGC_SCZ wave3 (excl. wave2)                        | 0        | 0.99        | 0.00198         | 0.283(32540)        | 0.276(49668)         | 0.038        | 0.012        |
| <b>PGC_SCZ wave3 (incl. wave2)</b>                 | <b>0</b> | <b>0.99</b> | <b>2.83e-08</b> | <b>0.293(67390)</b> | <b>0.281(94015)</b>  | <b>0.048</b> | <b>0.009</b> |
| Decode – Replication                               | 0        | 1.00        | 0.166           | 0.307(1979)         | 0.297(142627)        | 0.038        | 0.042        |
| <b>PGC_SCZ wave3 (incl. wave2 and replication)</b> | <b>0</b> | <b>1.00</b> | <b>1.11e-08</b> | <b>0.293(69369)</b> | <b>0.291(236642)</b> | <b>0.048</b> | <b>0.008</b> |

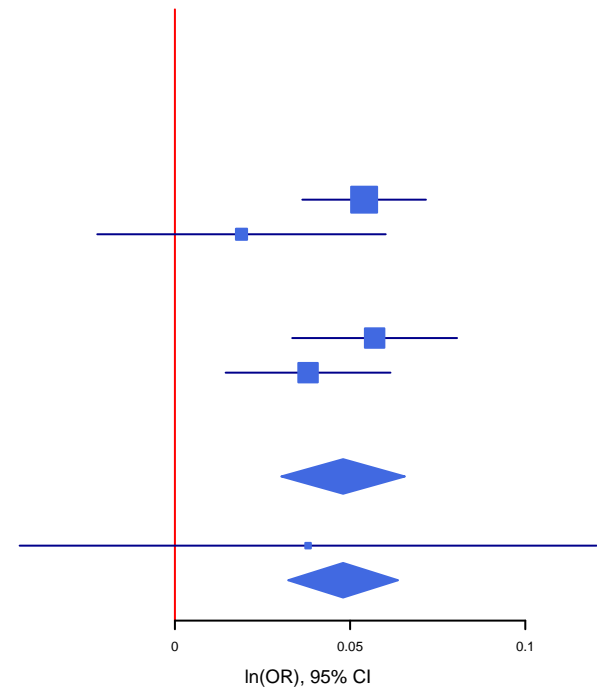

| rs7900775                                          | T/C       |             | 10:106600343    |                     |                      |              |              |
|----------------------------------------------------|-----------|-------------|-----------------|---------------------|----------------------|--------------|--------------|
|                                                    | ++        |             | het_P:          |                     | 0.471                | het_I:       | 0.0          |
|                                                    | ngt       | info        | p_value         | f_ca(n)             | f_co(n)              | ln(OR)       | STDerr       |
| PGC_SCZ wave3 eur only                             | 66        | 1.00        | 3.82e-08        | 0.371(53386)        | 0.359(77258)         | 0.049        | 0.009        |
| PGC_SCZ wave3 asn only                             | 9         | 0.99        | 0.683           | 0.148(14004)        | 0.144(16757)         | 0.01         | 0.024        |
| PGC_SCZ wave2 only                                 | 29        | 1.00        | 1.1e-05         | 0.358(34850)        | 0.351(44347)         | 0.05         | 0.011        |
| PGC_SCZ wave3 (excl. wave2)                        | 46        | 1.00        | 0.00229         | 0.289(32540)        | 0.294(49668)         | 0.038        | 0.012        |
| <b>PGC_SCZ wave3 (incl. wave2)</b>                 | <b>75</b> | <b>1.00</b> | <b>1.14e-07</b> | <b>0.325(67390)</b> | <b>0.321(94015)</b>  | <b>0.044</b> | <b>0.008</b> |
| Decode – Replication                               | 0         | 1.00        | 0.00835         | 0.347(1979)         | 0.354(142627)        | 0.038        | 0.039        |
| <b>PGC_SCZ wave3 (incl. wave2 and replication)</b> | <b>75</b> | <b>1.00</b> | <b>1.13e-08</b> | <b>0.326(69369)</b> | <b>0.341(236642)</b> | <b>0.047</b> | <b>0.008</b> |

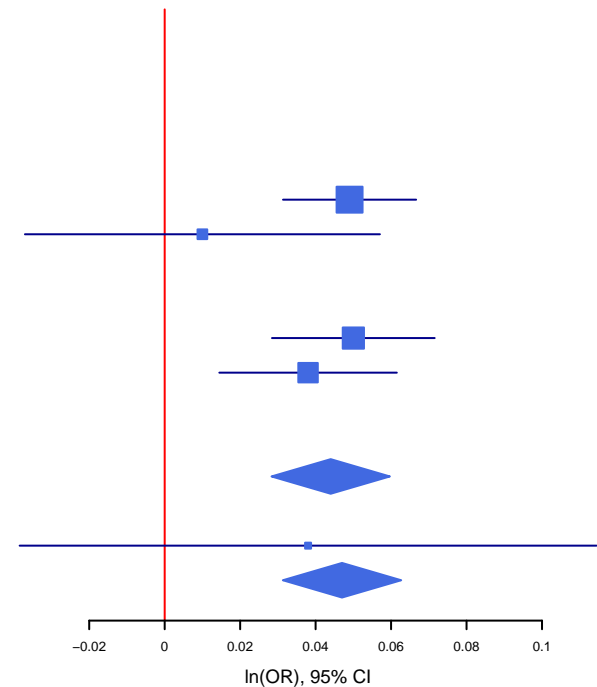

| rs2119242                                          | G/A       |             | 10:21344773     |                     |                      |               |              |
|----------------------------------------------------|-----------|-------------|-----------------|---------------------|----------------------|---------------|--------------|
|                                                    | ++        |             | het_P:          | 0.235               | het_I:               | 29.1          |              |
|                                                    | ngt       | info        | p_value         | f_ca(n)             | f_co(n)              | ln(OR)        | STDerr       |
| PGC_SCZ wave3 eur only                             | 14        | 0.95        | 4.31e-06        | 0.846(53386)        | 0.854(77258)         | -0.057        | 0.012        |
| PGC_SCZ wave3 asn only                             | 3         | 0.94        | 0.000719        | 0.762(14004)        | 0.768(16757)         | -0.07         | 0.021        |
| PGC_SCZ wave2 only                                 | 14        | 0.98        | 0.0018          | 0.841(34850)        | 0.85(44347)          | -0.047        | 0.015        |
| PGC_SCZ wave3 (excl. wave2)                        | 3         | 0.93        | 9.97e-07        | 0.815(32540)        | 0.829(49668)         | -0.072        | 0.015        |
| <b>PGC_SCZ wave3 (incl. wave2)</b>                 | <b>17</b> | <b>0.95</b> | <b>1.34e-08</b> | <b>0.829(67390)</b> | <b>0.839(94015)</b>  | <b>-0.06</b>  | <b>0.011</b> |
| Decode – Replication                               | 0         | 1.00        | 0.475           | 0.845(1979)         | 0.859(142627)        | -0.072        | 0.052        |
| <b>PGC_SCZ wave3 (incl. wave2 and replication)</b> | <b>17</b> | <b>0.98</b> | <b>1.14e-08</b> | <b>0.829(69369)</b> | <b>0.851(236642)</b> | <b>-0.059</b> | <b>0.01</b>  |

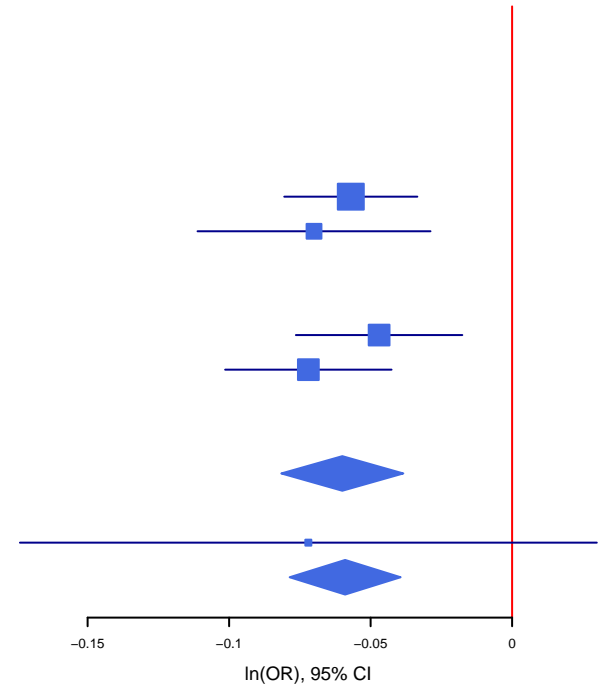



rs12474906

|     |                          |
|-----|--------------------------|
| A/C | 2:28033538               |
| ++  | het_P: 0.127 het_I: 57.0 |

|                                             | ngt | info | p_value  | f_ca(n)      | f_co(n)       | ln(OR) | STDerr |
|---------------------------------------------|-----|------|----------|--------------|---------------|--------|--------|
| PGC_SCZ wave3 eur only                      | 7   | 0.96 | 3.84e-07 | 0.809(53386) | 0.798(77258)  | 0.056  | 0.011  |
| PGC_SCZ wave3 asn only                      | 0   | 0.89 | 0.00154  | 0.406(14004) | 0.391(16757)  | 0.059  | 0.019  |
| PGC_SCZ wave2 only                          | 1   | 0.97 | 1.61e-07 | 0.785(34850) | 0.787(44347)  | 0.072  | 0.014  |
| PGC_SCZ wave3 (excl. wave2)                 | 6   | 0.93 | 0.00109  | 0.66(32540)  | 0.671(49668)  | 0.043  | 0.013  |
| PGC_SCZ wave3 (incl. wave2)                 | 7   | 0.95 | 2.2e-09  | 0.725(67390) | 0.726(94015)  | 0.057  | 0.01   |
| Decode – Replication                        | 0   | 1.00 | 0.422    | 0.81(1979)   | 0.798(142627) | 0.043  | 0.048  |
| PGC_SCZ wave3 (incl. wave2 and replication) | 7   | 0.98 | 1.16e-08 | 0.727(69369) | 0.769(236642) | 0.053  | 0.009  |

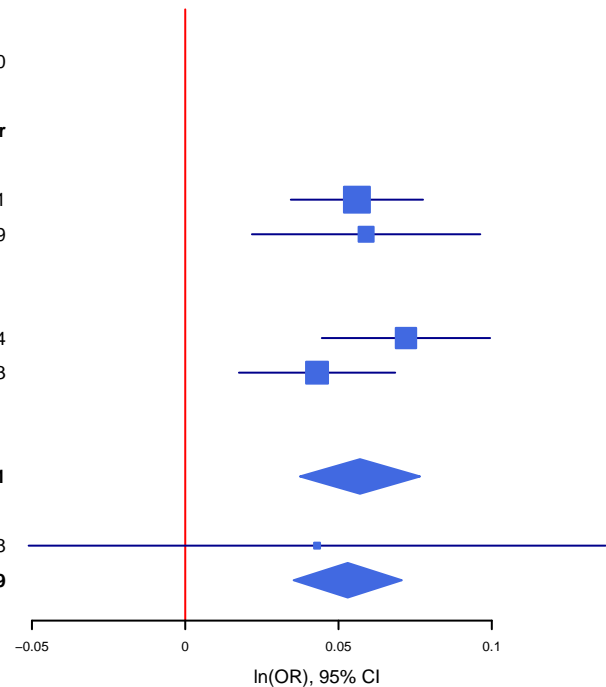

| <b>rs9341835</b>                                   |          | <b>T/C</b>  |                 | <b>6:64126180</b>   |                      |               |              |
|----------------------------------------------------|----------|-------------|-----------------|---------------------|----------------------|---------------|--------------|
|                                                    |          | —           |                 | het_P:              | 0.014                | het_I:        | 83.4         |
|                                                    | ngt      | info        | p_value         | f_ca(n)             | f_co(n)              | ln(OR)        | STDerr       |
| PGC_SCZ wave3 eur only                             | 2        | 0.96        | 7.58e-07        | 0.481(53386)        | 0.488(77258)         | -0.044        | 0.009        |
| PGC_SCZ wave3 asn only                             | 1        | 0.95        | 0.0675          | 0.46(14004)         | 0.472(16757)         | -0.032        | 0.018        |
| PGC_SCZ wave2 only                                 | 2        | 0.96        | 4.9e-08         | 0.473(34850)        | 0.483(44347)         | -0.06         | 0.011        |
| PGC_SCZ wave3 (excl. wave2)                        | 1        | 0.95        | 0.0524          | 0.48(32540)         | 0.488(49668)         | -0.022        | 0.011        |
| <b>PGC_SCZ wave3 (incl. wave2)</b>                 | <b>3</b> | <b>0.96</b> | <b>1.61e-07</b> | <b>0.476(67390)</b> | <b>0.485(94015)</b>  | <b>-0.041</b> | <b>0.008</b> |
| Decode – Replication                               | 0        | 1.00        | 0.00302         | 0.484(1979)         | 0.515(142627)        | -0.022        | 0.038        |
| <b>PGC_SCZ wave3 (incl. wave2 and replication)</b> | <b>3</b> | <b>0.98</b> | <b>1.16e-08</b> | <b>0.476(69369)</b> | <b>0.503(236642)</b> | <b>-0.044</b> | <b>0.008</b> |

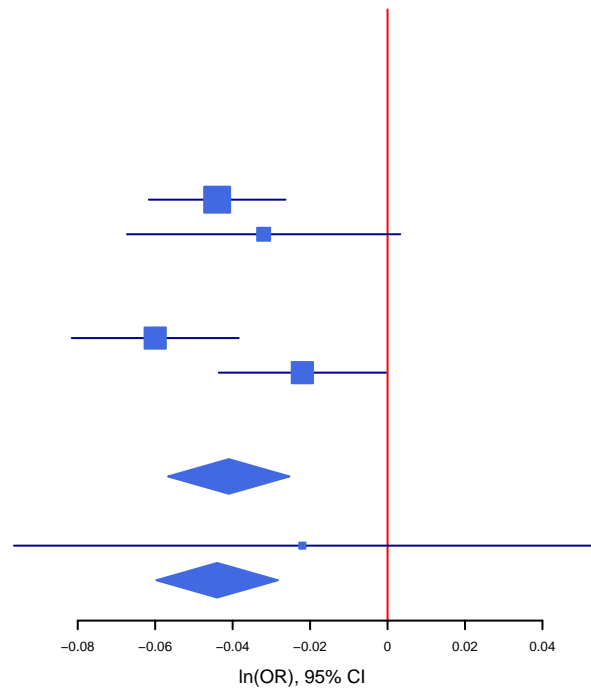

|                                                    |            |             |                   |                     |                      |               |               |
|----------------------------------------------------|------------|-------------|-------------------|---------------------|----------------------|---------------|---------------|
| <b>rs500102</b>                                    | <b>T/C</b> |             | <b>9:77358745</b> |                     |                      |               |               |
|                                                    | ++         |             | het_P:            | 0.043               | het_I:               | 75.6          |               |
|                                                    | <b>ngt</b> | <b>info</b> | <b>p_value</b>    | <b>f_ca(n)</b>      | <b>f_co(n)</b>       | <b>ln(OR)</b> | <b>STDerr</b> |
| PGC_SCZ wave3 eur only                             | 11         | 0.98        | 4.87e-09          | 0.413(53386)        | 0.409(77258)         | 0.052         | 0.009         |
| PGC_SCZ wave3 asn only                             | 4          | 0.93        | 0.567             | 0.536(14004)        | 0.531(16757)         | 0.01          | 0.018         |
| PGC_SCZ wave2 only                                 | 12         | 0.98        | 9.77e-08          | 0.43(34850)         | 0.417(44347)         | 0.059         | 0.011         |
| PGC_SCZ wave3 (excl. wave2)                        | 3          | 0.96        | 0.0163            | 0.447(32540)        | 0.443(49668)         | 0.027         | 0.011         |
| <b>PGC_SCZ wave3 (incl. wave2)</b>                 | <b>15</b>  | <b>0.97</b> | <b>4.15e-08</b>   | <b>0.438(67390)</b> | <b>0.431(94015)</b>  | <b>0.043</b>  | <b>0.008</b>  |
| Decode – Replication                               | 0          | 1.00        | 0.0961            | 0.405(1979)         | 0.436(142627)        | 0.027         | 0.038         |
| <b>PGC_SCZ wave3 (incl. wave2 and replication)</b> | <b>15</b>  | <b>0.99</b> | <b>1.17e-08</b>   | <b>0.437(69369)</b> | <b>0.434(236642)</b> | <b>0.044</b>  | <b>0.008</b>  |

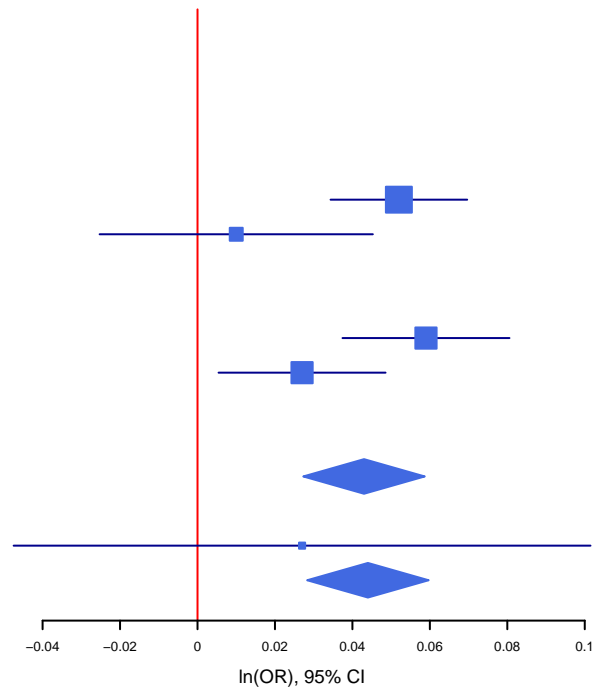

rs10127983

C/T  
++  
1:153923276  
het\_P: 0.217 het\_I: 34.5

|                                             | ngt | info | p_value  | f_ca(n)      | f_co(n)       | ln(OR) | STDerr |
|---------------------------------------------|-----|------|----------|--------------|---------------|--------|--------|
| PGC_SCZ wave3 eur only                      | 41  | 0.99 | 3.06e-06 | 0.681(53386) | 0.691(77258)  | -0.043 | 0.009  |
| PGC_SCZ wave3 asn only                      | 5   | 0.98 | 0.00217  | 0.724(14004) | 0.736(16757)  | -0.059 | 0.019  |
| PGC_SCZ wave2 only                          | 8   | 0.99 | 0.00196  | 0.682(34850) | 0.69(44347)   | -0.036 | 0.012  |
| PGC_SCZ wave3 (excl. wave2)                 | 38  | 0.99 | 2.01e-06 | 0.699(32540) | 0.707(49668)  | -0.057 | 0.012  |
| PGC_SCZ wave3 (incl. wave2)                 | 46  | 0.99 | 3.11e-08 | 0.69(67390)  | 0.699(94015)  | -0.046 | 0.008  |
| Decode - Replication                        | 0   | 1.00 | 0.131    | 0.663(1979)  | 0.697(142627) | -0.057 | 0.041  |
| PGC_SCZ wave3 (incl. wave2 and replication) | 46  | 1.00 | 1.18e-08 | 0.689(69369) | 0.698(236642) | -0.047 | 0.008  |

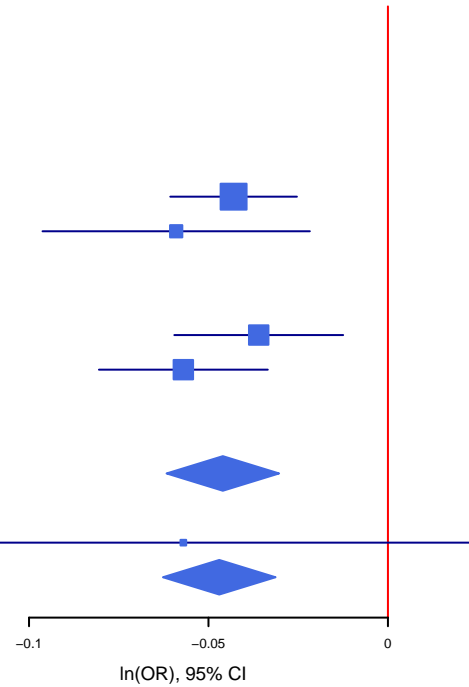

rs6839635

|     |                         |
|-----|-------------------------|
| C/A | 4:103872854             |
| ++  | het_P: 0.499 het_I: 0.0 |

|                                             | ngt | info | p_value  | f_ca(n)      | f_co(n)       | ln(OR) | STDerr |
|---------------------------------------------|-----|------|----------|--------------|---------------|--------|--------|
| PGC_SCZ wave3 eur only                      | 0   | 0.96 | 1.67e-05 | 0.507(53386) | 0.516(77258)  | -0.038 | 0.009  |
| PGC_SCZ wave3 asn only                      | 0   | 0.92 | 0.000209 | 0.427(14004) | 0.441(16757)  | -0.066 | 0.018  |
| PGC_SCZ wave2 only                          | 0   | 0.96 | 1.11e-05 | 0.501(34850) | 0.514(44347)  | -0.048 | 0.011  |
| PGC_SCZ wave3 (excl. wave2)                 | 0   | 0.95 | 0.000748 | 0.479(32540) | 0.492(49668)  | -0.038 | 0.011  |
| PGC_SCZ wave3 (incl. wave2)                 | 0   | 0.95 | 3.87e-08 | 0.49(67390)  | 0.502(94015)  | -0.043 | 0.008  |
| Decode - Replication                        | 0   | 1.00 | 0.0908   | 0.525(1979)  | 0.516(142627) | -0.038 | 0.038  |
| PGC_SCZ wave3 (incl. wave2 and replication) | 0   | 0.98 | 1.21e-08 | 0.491(69369) | 0.511(236642) | -0.044 | 0.008  |

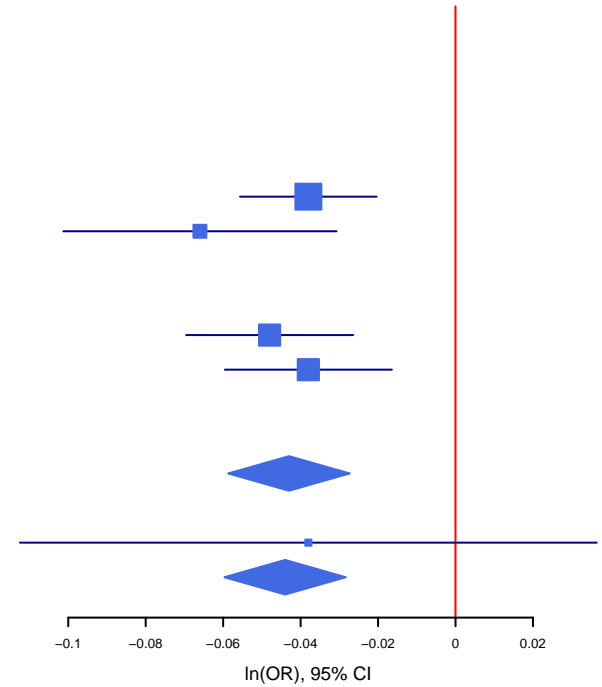

rs2890914

|     |                         |
|-----|-------------------------|
| A/G | 9:10239181              |
| --- | het_P: 0.791 het_I: 0.0 |

|  | ngt | info | p_value | f_ca(n) | f_co(n) | ln(OR) | STDerr |
|--|-----|------|---------|---------|---------|--------|--------|
|--|-----|------|---------|---------|---------|--------|--------|

|                        |   |      |          |              |              |        |       |
|------------------------|---|------|----------|--------------|--------------|--------|-------|
| PGC_SCZ wave3 eur only | 7 | 0.99 | 3.86e-05 | 0.498(53386) | 0.509(77258) | -0.036 | 0.009 |
| PGC_SCZ wave3 asn only | 3 | 0.99 | 1.83e-05 | 0.382(14004) | 0.401(16757) | -0.075 | 0.018 |

|                             |   |      |          |              |              |        |       |
|-----------------------------|---|------|----------|--------------|--------------|--------|-------|
| PGC_SCZ wave2 only          | 2 | 0.99 | 0.000148 | 0.491(34850) | 0.507(44347) | -0.041 | 0.011 |
| PGC_SCZ wave3 (excl. wave2) | 8 | 0.99 | 3.97e-05 | 0.456(32540) | 0.474(49668) | -0.045 | 0.011 |

|                             |    |      |          |              |             |        |       |
|-----------------------------|----|------|----------|--------------|-------------|--------|-------|
| PGC_SCZ wave3 (incl. wave2) | 10 | 0.99 | 2.31e-08 | 0.474(67390) | 0.49(94015) | -0.043 | 0.008 |
|-----------------------------|----|------|----------|--------------|-------------|--------|-------|

|                      |   |      |       |             |               |        |       |
|----------------------|---|------|-------|-------------|---------------|--------|-------|
| Decode - Replication | 0 | 1.00 | 0.323 | 0.494(1979) | 0.492(142627) | -0.045 | 0.038 |
|----------------------|---|------|-------|-------------|---------------|--------|-------|

|                                             |    |      |          |              |               |        |       |
|---------------------------------------------|----|------|----------|--------------|---------------|--------|-------|
| PGC_SCZ wave3 (incl. wave2 and replication) | 10 | 1.00 | 1.24e-08 | 0.475(69369) | 0.491(236642) | -0.043 | 0.008 |
|---------------------------------------------|----|------|----------|--------------|---------------|--------|-------|

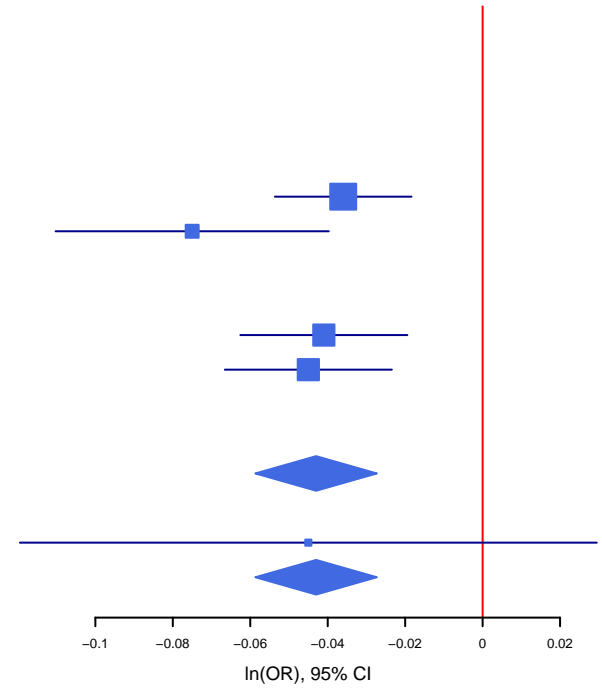

rs9390083

|     |                         |
|-----|-------------------------|
| C/G | 6:143647665             |
| --- | het_P: 0.981 het_I: 0.0 |

|                             | ngt | info | p_value  | f_ca(n)      | f_co(n)      | ln(OR) | STDerr |
|-----------------------------|-----|------|----------|--------------|--------------|--------|--------|
| PGC_SCZ wave3 eur only      | 12  | 0.98 | 4.26e-06 | 0.827(53386) | 0.835(77258) | -0.053 | 0.012  |
| PGC_SCZ wave3 asn only      | 3   | 0.94 | 0.00139  | 0.816(14004) | 0.826(16757) | -0.073 | 0.023  |
| PGC_SCZ wave2 only          | 12  | 0.99 | 7.85e-05 | 0.825(34850) | 0.833(44347) | -0.057 | 0.014  |
| PGC_SCZ wave3 (excl. wave2) | 3   | 0.96 | 9.95e-05 | 0.825(32540) | 0.833(49668) | -0.057 | 0.015  |

|                                             |    |      |          |              |               |        |      |
|---------------------------------------------|----|------|----------|--------------|---------------|--------|------|
| PGC_SCZ wave3 (incl. wave2)                 | 15 | 0.98 | 2.95e-08 | 0.825(67390) | 0.833(94015)  | -0.057 | 0.01 |
| Decode - Replication                        | 0  | 1.00 | 0.208    | 0.832(1979)  | 0.827(142627) | -0.057 | 0.05 |
| PGC_SCZ wave3 (incl. wave2 and replication) | 15 | 0.99 | 1.25e-08 | 0.825(69369) | 0.829(236642) | -0.057 | 0.01 |

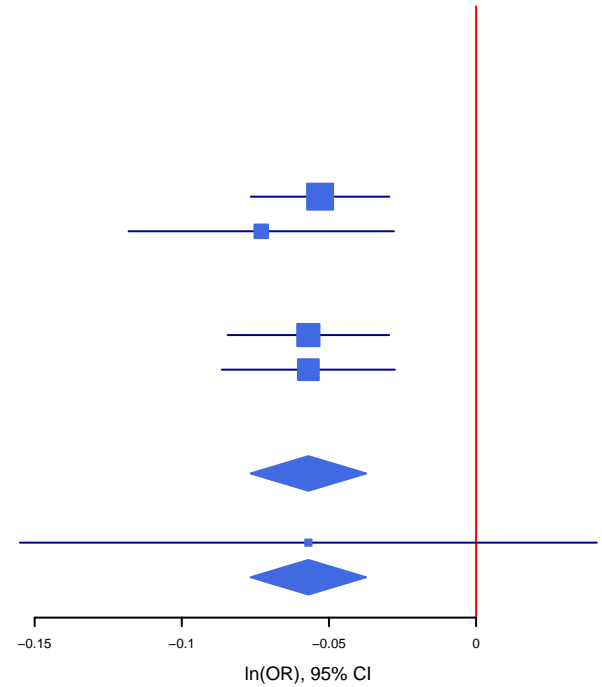

| <b>rs4672366</b>                                   | <b>A/T</b> |             | <b>2:60389362</b> |                     |                      |              |              |
|----------------------------------------------------|------------|-------------|-------------------|---------------------|----------------------|--------------|--------------|
|                                                    | ++         |             | het_P:            | 0.904               | het_I:               | 0.0          |              |
|                                                    | ngt        | info        | p_value           | f_ca(n)             | f_co(n)              | ln(OR)       | STDerr       |
| PGC_SCZ wave3 eur only                             | 0          | 0.93        | 2.8e-08           | 0.711(53386)        | 0.702(77258)         | 0.054        | 0.01         |
| PGC_SCZ wave3 asn only                             | 0          | 0.82        | 0.088             | 0.594(14004)        | 0.585(16757)         | 0.033        | 0.019        |
| PGC_SCZ wave2 only                                 | 0          | 0.95        | 6.4e-05           | 0.704(34850)        | 0.698(44347)         | 0.049        | 0.012        |
| PGC_SCZ wave3 (excl. wave2)                        | 0          | 0.88        | 4.27e-05          | 0.667(32540)        | 0.665(49668)         | 0.051        | 0.012        |
| <b>PGC_SCZ wave3 (incl. wave2)</b>                 | <b>0</b>   | <b>0.91</b> | <b>1.07e-08</b>   | <b>0.686(67390)</b> | <b>0.681(94015)</b>  | <b>0.05</b>  | <b>0.009</b> |
| Decode – Replication                               | 0          | 1.00        | 0.67              | 0.707(1979)         | 0.73(142627)         | 0.051        | 0.042        |
| <b>PGC_SCZ wave3 (incl. wave2 and replication)</b> | <b>0</b>   | <b>0.96</b> | <b>1.25e-08</b>   | <b>0.687(69369)</b> | <b>0.711(236642)</b> | <b>0.049</b> | <b>0.008</b> |

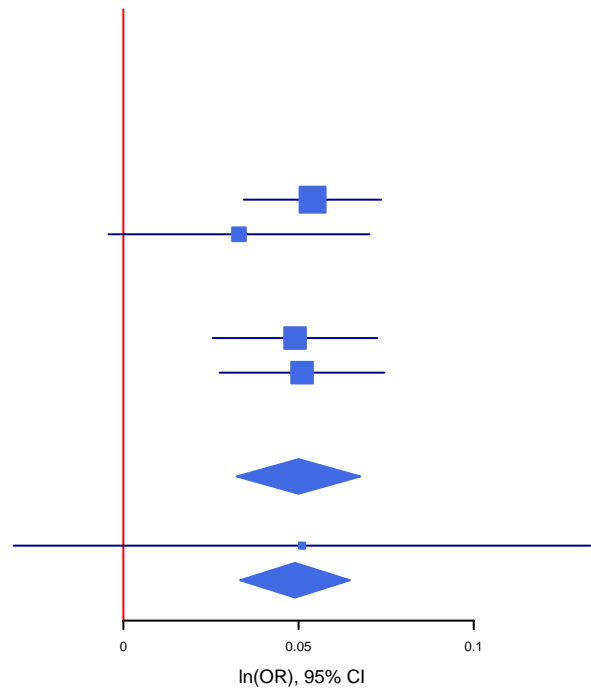



rs13032111

T/G

2:193925069

++

het\_P:

0.167

het\_I:

47.6

|  | ngt | info | p_value | f_ca(n) | f_co(n) | ln(OR) | STDerr |
|--|-----|------|---------|---------|---------|--------|--------|
|--|-----|------|---------|---------|---------|--------|--------|

PGC\_SCZ wave3 eur only

|   |      |          |              |              |       |       |
|---|------|----------|--------------|--------------|-------|-------|
| 0 | 1.00 | 7.69e-07 | 0.489(53386) | 0.476(77258) | 0.043 | 0.009 |
|---|------|----------|--------------|--------------|-------|-------|

PGC\_SCZ wave3 asn only

|   |      |         |              |              |       |       |
|---|------|---------|--------------|--------------|-------|-------|
| 0 | 0.98 | 0.00838 | 0.426(14004) | 0.409(16757) | 0.046 | 0.017 |
|---|------|---------|--------------|--------------|-------|-------|

PGC\_SCZ wave2 only

|   |      |          |             |              |       |       |
|---|------|----------|-------------|--------------|-------|-------|
| 0 | 1.00 | 7.12e-07 | 0.49(34850) | 0.477(44347) | 0.054 | 0.011 |
|---|------|----------|-------------|--------------|-------|-------|

PGC\_SCZ wave3 (excl. wave2)

|   |      |         |              |              |       |       |
|---|------|---------|--------------|--------------|-------|-------|
| 0 | 0.99 | 0.00321 | 0.461(32540) | 0.452(49668) | 0.032 | 0.011 |
|---|------|---------|--------------|--------------|-------|-------|

**PGC\_SCZ wave3 (incl. wave2)**

|          |             |                 |                     |                     |              |              |
|----------|-------------|-----------------|---------------------|---------------------|--------------|--------------|
| <b>0</b> | <b>1.00</b> | <b>2.15e-08</b> | <b>0.476(67390)</b> | <b>0.464(94015)</b> | <b>0.043</b> | <b>0.008</b> |
|----------|-------------|-----------------|---------------------|---------------------|--------------|--------------|

Decode – Replication

|   |      |       |             |               |       |       |
|---|------|-------|-------------|---------------|-------|-------|
| 0 | 1.00 | 0.337 | 0.494(1979) | 0.488(142627) | 0.032 | 0.037 |
|---|------|-------|-------------|---------------|-------|-------|

**PGC\_SCZ wave3 (incl. wave2 and replication)**

|          |             |                 |                     |                      |              |              |
|----------|-------------|-----------------|---------------------|----------------------|--------------|--------------|
| <b>0</b> | <b>1.00</b> | <b>1.28e-08</b> | <b>0.477(69369)</b> | <b>0.479(236642)</b> | <b>0.043</b> | <b>0.008</b> |
|----------|-------------|-----------------|---------------------|----------------------|--------------|--------------|

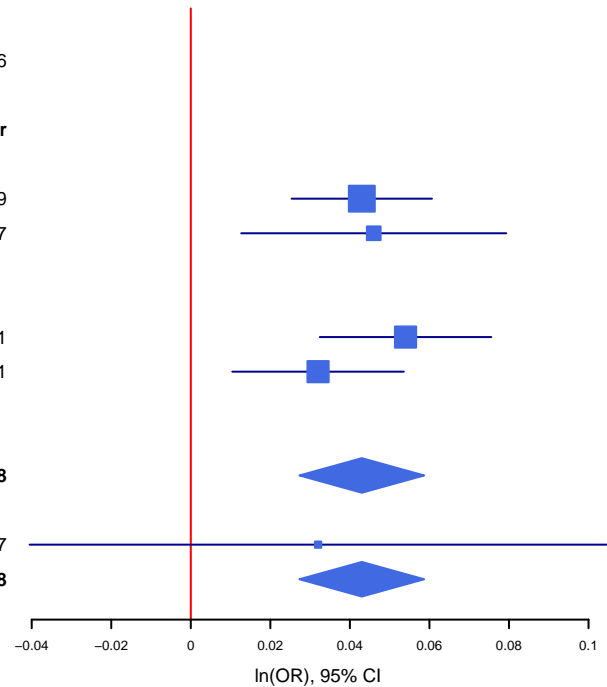

| rs6010045                                          | T/C      |             | 22:51103091             |                     |                     |               |              |
|----------------------------------------------------|----------|-------------|-------------------------|---------------------|---------------------|---------------|--------------|
|                                                    | —        |             | het_P: 0.648 het_I: 0.0 |                     |                     |               |              |
|                                                    | ngt      | info        | p_value                 | f_ca(n)             | f_co(n)             | ln(OR)        | STDerr       |
| PGC_SCZ wave3 eur only                             | 0        | 0.98        | 7.45e-09                | 0.297(53238)        | 0.302(77025)        | -0.055        | 0.01         |
| PGC_SCZ wave3 asn only                             | 0        | 0.85        | 0.295                   | 0.411(14004)        | 0.42(16757)         | -0.02         | 0.019        |
| PGC_SCZ wave2 only                                 | 0        | 0.98        | 0.000275                | 0.297(34702)        | 0.297(44114)        | -0.044        | 0.012        |
| PGC_SCZ wave3 (excl. wave2)                        | 0        | 0.94        | 1.56e-05                | 0.346(32540)        | 0.347(49668)        | -0.052        | 0.012        |
| <b>PGC_SCZ wave3 (incl. wave2)</b>                 | <b>0</b> | <b>0.96</b> | <b>1.82e-08</b>         | <b>0.321(67242)</b> | <b>0.323(93782)</b> | <b>-0.048</b> | <b>0.008</b> |
| Decode – Replication                               | 0        | 1.00        | 0.39                    | 0.297(1979)         | 0.268(142627)       | -0.052        | 0.042        |
| <b>PGC_SCZ wave3 (incl. wave2 and replication)</b> | <b>0</b> | <b>0.98</b> | <b>1.42e-08</b>         | <b>0.32(69221)</b>  | <b>0.29(236409)</b> | <b>-0.047</b> | <b>0.008</b> |

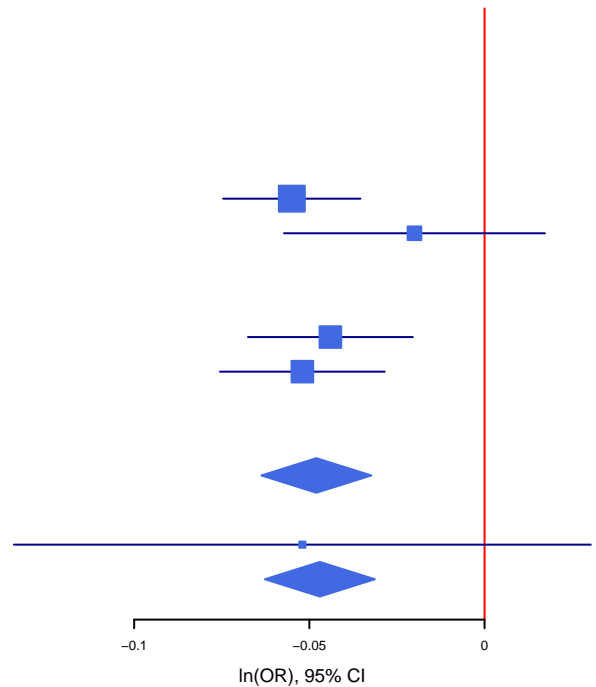

| rs337718                                           | T/C       |             | 18:69774278     |                     |                      |              |              |
|----------------------------------------------------|-----------|-------------|-----------------|---------------------|----------------------|--------------|--------------|
|                                                    | ++        |             | het_P:          | 0.77                | het_I:               | 0.0          |              |
|                                                    | ngt       | info        | p_value         | f_ca(n)             | f_co(n)              | ln(OR)       | STDerr       |
| PGC_SCZ wave3 eur only                             | 43        | 1.00        | 1.02e-06        | 0.301(53386)        | 0.29(77258)          | 0.046        | 0.009        |
| PGC_SCZ wave3 asn only                             | 6         | 0.99        | 0.000884        | 0.324(14004)        | 0.311(16757)         | 0.061        | 0.018        |
| PGC_SCZ wave2 only                                 | 11        | 0.99        | 1.35e-05        | 0.303(34850)        | 0.29(44347)          | 0.052        | 0.012        |
| PGC_SCZ wave3 (excl. wave2)                        | 38        | 0.99        | 7.84e-05        | 0.308(32540)        | 0.297(49668)         | 0.047        | 0.012        |
| <b>PGC_SCZ wave3 (incl. wave2)</b>                 | <b>49</b> | <b>0.99</b> | <b>4.39e-09</b> | <b>0.305(67390)</b> | <b>0.294(94015)</b>  | <b>0.049</b> | <b>0.008</b> |
| Decode – Replication                               | 0         | 1.00        | 0.682           | 0.31(1979)          | 0.292(142627)        | 0.047        | 0.043        |
| <b>PGC_SCZ wave3 (incl. wave2 and replication)</b> | <b>49</b> | <b>1.00</b> | <b>1.42e-08</b> | <b>0.305(69369)</b> | <b>0.293(236642)</b> | <b>0.047</b> | <b>0.008</b> |

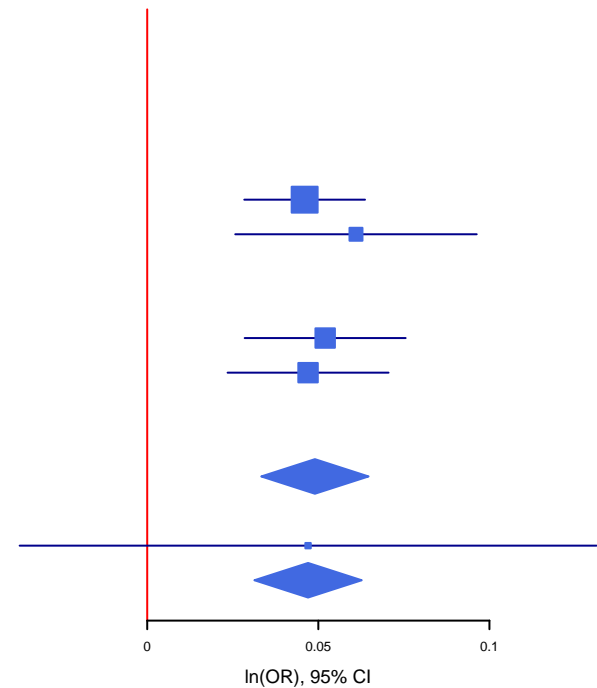

rs758749

C/T

19:57189718

++

het\_P:

0.964

het\_I:

0.0

ngt info p\_value f\_ca(n) f\_co(n) ln(OR) STDerr

PGC\_SCZ wave3 eur only

13 0.96 1.29e-05 0.863(53386) 0.869(77258) -0.056 0.013

PGC\_SCZ wave3 asn only

3 0.89 0.000672 0.813(14004) 0.825(16757) -0.079 0.023

PGC\_SCZ wave2 only

11 0.95 0.00013 0.859(34850) 0.868(44347) -0.062 0.016

PGC\_SCZ wave3 (excl. wave2)

5 0.95 9.58e-05 0.845(32540) 0.855(49668) -0.061 0.016

PGC\_SCZ wave3 (incl. wave2)

16 0.95 4.66e-08 0.853(67390) 0.861(94015) -0.062 0.011

Decode - Replication

0 1.00 0.15 0.855(1979) 0.841(142627) -0.061 0.053

PGC\_SCZ wave3 (incl. wave2 and replication)

16 0.98 1.42e-08 0.853(69369) 0.849(236642) -0.062 0.011

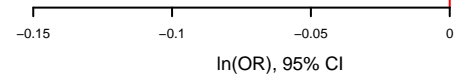

rs144821294

C/T

19:2155136

++

het\_P:

0.109

het\_I:

61.2

| ngt | info | p_value | f_ca(n) | f_co(n) | ln(OR) | STDerr |
|-----|------|---------|---------|---------|--------|--------|
|-----|------|---------|---------|---------|--------|--------|

PGC\_SCZ wave3 eur only

|   |      |          |              |             |        |       |
|---|------|----------|--------------|-------------|--------|-------|
| 0 | 0.78 | 1.22e-07 | 0.979(50657) | 0.98(73033) | -0.188 | 0.036 |
|---|------|----------|--------------|-------------|--------|-------|

PGC\_SCZ wave3 asn only

|   |      |         |              |              |        |       |
|---|------|---------|--------------|--------------|--------|-------|
| 0 | 0.72 | 0.00427 | 0.898(14004) | 0.904(16757) | -0.095 | 0.033 |
|---|------|---------|--------------|--------------|--------|-------|

PGC\_SCZ wave2 only

|   |      |          |              |              |        |      |
|---|------|----------|--------------|--------------|--------|------|
| 0 | 0.77 | 2.31e-06 | 0.971(33417) | 0.976(41411) | -0.189 | 0.04 |
|---|------|----------|--------------|--------------|--------|------|

PGC\_SCZ wave3 (excl. wave2)

|   |      |          |             |              |        |      |
|---|------|----------|-------------|--------------|--------|------|
| 0 | 0.76 | 0.000364 | 0.95(31244) | 0.958(48379) | -0.108 | 0.03 |
|---|------|----------|-------------|--------------|--------|------|

**PGC\_SCZ wave3 (incl. wave2)**

|          |             |                 |                     |                     |               |              |
|----------|-------------|-----------------|---------------------|---------------------|---------------|--------------|
| <b>0</b> | <b>0.77</b> | <b>1.22e-08</b> | <b>0.961(64661)</b> | <b>0.966(89790)</b> | <b>-0.138</b> | <b>0.024</b> |
|----------|-------------|-----------------|---------------------|---------------------|---------------|--------------|

Decode - Replication

|   |      |       |             |               |        |       |
|---|------|-------|-------------|---------------|--------|-------|
| 0 | 0.99 | 0.746 | 0.981(1979) | 0.977(142627) | -0.108 | 0.132 |
|---|------|-------|-------------|---------------|--------|-------|

**PGC\_SCZ wave3 (incl. wave2 and replication)**

|          |             |                 |                     |                      |               |              |
|----------|-------------|-----------------|---------------------|----------------------|---------------|--------------|
| <b>0</b> | <b>0.91</b> | <b>1.45e-08</b> | <b>0.962(66640)</b> | <b>0.973(232417)</b> | <b>-0.135</b> | <b>0.024</b> |
|----------|-------------|-----------------|---------------------|----------------------|---------------|--------------|

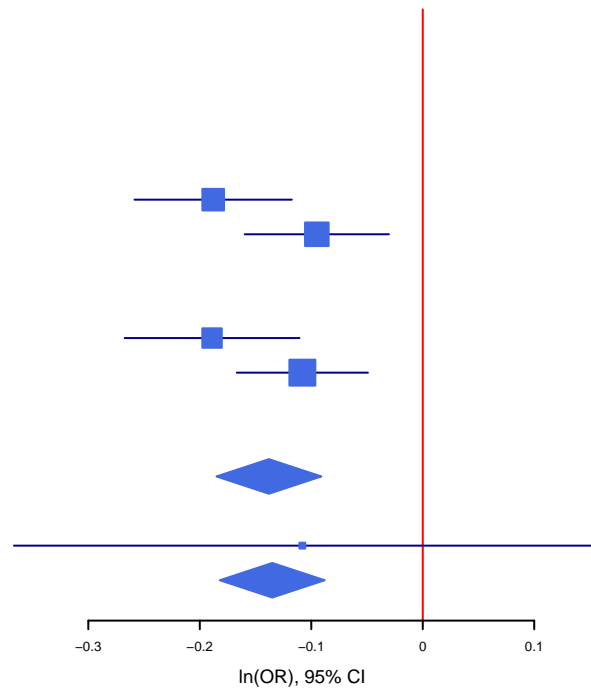

rs56245805

|     |                        |
|-----|------------------------|
| G/A | 20:37489569            |
| ++  | het_P: 0.97 het_I: 0.0 |

|                                             | ngt | info | p_value  | f_ca(n)      | f_co(n)       | ln(OR) | STDerr |
|---------------------------------------------|-----|------|----------|--------------|---------------|--------|--------|
| PGC_SCZ wave3 eur only                      | 2   | 0.85 | 2.65e-10 | 0.818(53386) | 0.827(77258)  | -0.077 | 0.012  |
| PGC_SCZ wave3 asn only                      | 0   | 0.43 | 0.583    | 0.94(14004)  | 0.939(16757)  | 0.03   | 0.054  |
| PGC_SCZ wave2 only                          | 2   | 0.84 | 4.33e-06 | 0.824(34850) | 0.83(44347)   | -0.071 | 0.016  |
| PGC_SCZ wave3 (excl. wave2)                 | 0   | 0.71 | 8.89e-05 | 0.864(32540) | 0.862(49668)  | -0.072 | 0.018  |
| PGC_SCZ wave3 (incl. wave2)                 | 2   | 0.77 | 1.55e-09 | 0.843(67390) | 0.847(94015)  | -0.072 | 0.012  |
| Decode - Replication                        | 0   | 0.99 | 0.318    | 0.823(1979)  | 0.834(142627) | -0.072 | 0.052  |
| PGC_SCZ wave3 (incl. wave2 and replication) | 2   | 0.91 | 1.49e-08 | 0.842(69369) | 0.839(236642) | -0.066 | 0.012  |

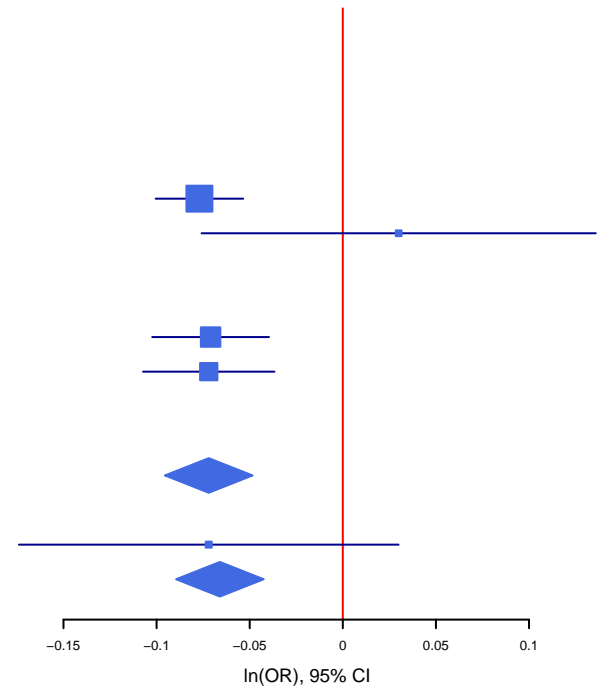

|                                                    |           |             |                        |                     |                     |              |             |
|----------------------------------------------------|-----------|-------------|------------------------|---------------------|---------------------|--------------|-------------|
| rs999494                                           | C/T       |             | 2:73157395             |                     |                     |              |             |
|                                                    | --        |             | het_P: 0.37 het_I: 0.0 |                     |                     |              |             |
|                                                    | ngt       | info        | p_value                | f_ca(n)             | f_co(n)             | ln(OR)       | STDerr      |
| PGC_SCZ wave3 eur only                             | 79        | 0.99        | 2.61e-07               | 0.811(53386)        | 0.802(77258)        | 0.056        | 0.011       |
| PGC_SCZ wave3 asn only                             | 13        | 0.99        | 0.012                  | 0.873(14004)        | 0.868(16757)        | 0.064        | 0.025       |
| PGC_SCZ wave2 only                                 | 47        | 0.99        | 2.01e-06               | 0.819(34850)        | 0.808(44347)        | 0.066        | 0.014       |
| PGC_SCZ wave3 (excl. wave2)                        | 45        | 0.99        | 0.000926               | 0.83(32540)         | 0.819(49668)        | 0.048        | 0.014       |
| <b>PGC_SCZ wave3 (incl. wave2)</b>                 | <b>92</b> | <b>0.99</b> | <b>1.04e-08</b>        | <b>0.824(67390)</b> | <b>0.814(94015)</b> | <b>0.058</b> | <b>0.01</b> |
| Decode - Replication                               | 0         | 1.00        | 0.674                  | 0.795(1979)         | 0.758(142627)       | 0.048        | 0.046       |
| <b>PGC_SCZ wave3 (incl. wave2 and replication)</b> | <b>92</b> | <b>1.00</b> | <b>1.5e-08</b>         | <b>0.823(69369)</b> | <b>0.78(236642)</b> | <b>0.056</b> | <b>0.01</b> |

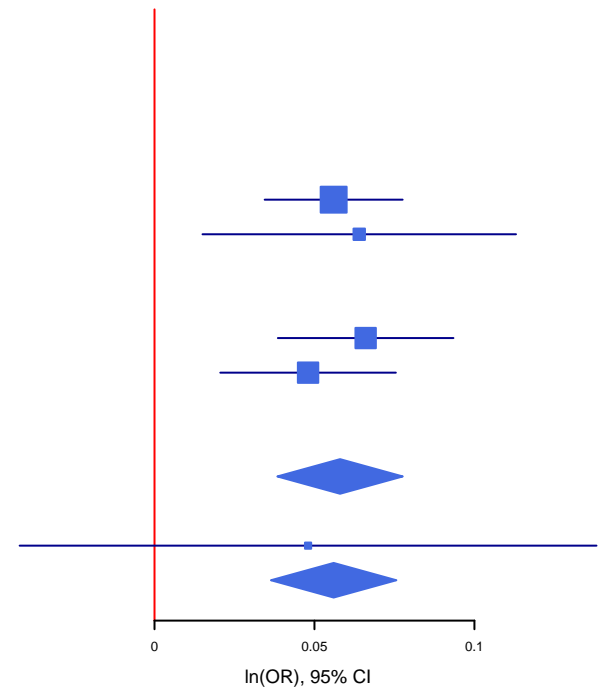

| rs12652777                                         | T/C      |             | 5:155775075     |                     |                      |              |              |
|----------------------------------------------------|----------|-------------|-----------------|---------------------|----------------------|--------------|--------------|
|                                                    | ++       |             | het_P:          |                     | 0.379                | het_I:       | 0.0          |
|                                                    | ngt      | info        | p_value         | f_ca(n)             | f_co(n)              | ln(OR)       | STDerr       |
| PGC_SCZ wave3 eur only                             | 6        | 1.00        | 1.52e-08        | 0.489(53386)        | 0.478(77258)         | 0.049        | 0.009        |
| PGC_SCZ wave3 asn only                             | 0        | 0.98        | 0.191           | 0.231(14004)        | 0.226(16757)         | 0.027        | 0.02         |
| PGC_SCZ wave2 only                                 | 0        | 0.99        | 1.86e-06        | 0.481(34850)        | 0.478(44347)         | 0.052        | 0.011        |
| PGC_SCZ wave3 (excl. wave2)                        | 6        | 0.99        | 0.00103         | 0.387(32540)        | 0.394(49668)         | 0.038        | 0.012        |
| <b>PGC_SCZ wave3 (incl. wave2)</b>                 | <b>6</b> | <b>0.99</b> | <b>1.06e-08</b> | <b>0.436(67390)</b> | <b>0.433(94015)</b>  | <b>0.045</b> | <b>0.008</b> |
| Decode – Replication                               | 0        | 1.00        | 0.879           | 0.462(1979)         | 0.472(142627)        | 0.038        | 0.038        |
| <b>PGC_SCZ wave3 (incl. wave2 and replication)</b> | <b>6</b> | <b>1.00</b> | <b>1.55e-08</b> | <b>0.437(69369)</b> | <b>0.457(236642)</b> | <b>0.044</b> | <b>0.008</b> |

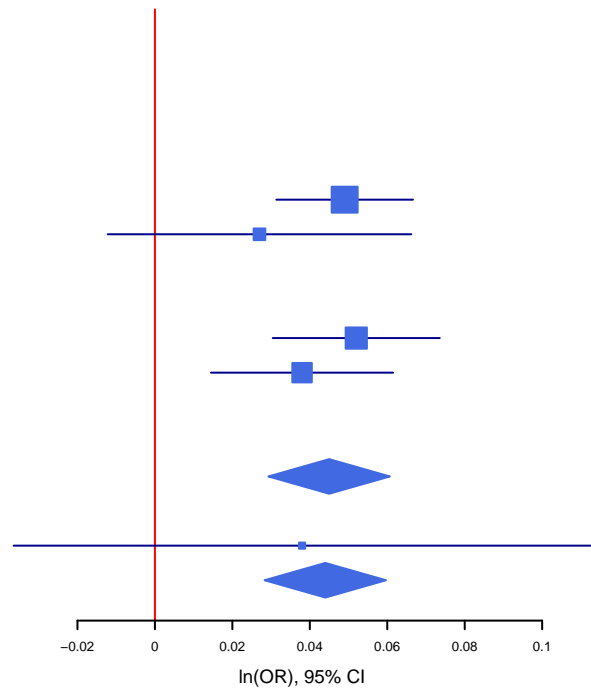



| rs8096175                                          | G/T      |             | 18:4992676      |                     |                      |               |             |
|----------------------------------------------------|----------|-------------|-----------------|---------------------|----------------------|---------------|-------------|
|                                                    | ++       |             | het_P:          | 0.408               | het_I:               | 0.0           |             |
|                                                    | ngt      | info        | p_value         | f_ca(n)             | f_co(n)              | ln(OR)        | STDerr      |
| PGC_SCZ wave3 eur only                             | 0        | 0.99        | 6.08e-06        | 0.842(53386)        | 0.847(77258)         | -0.054        | 0.012       |
| PGC_SCZ wave3 asn only                             | 0        | 0.92        | 0.0109          | 0.7(14004)          | 0.708(16757)         | -0.049        | 0.019       |
| PGC_SCZ wave2 only                                 | 0        | 0.99        | 3.48e-05        | 0.835(34850)        | 0.847(44347)         | -0.062        | 0.015       |
| PGC_SCZ wave3 (excl. wave2)                        | 0        | 0.97        | 0.00122         | 0.788(32540)        | 0.8(49668)           | -0.045        | 0.014       |
| <b>PGC_SCZ wave3 (incl. wave2)</b>                 | <b>0</b> | <b>0.98</b> | <b>2.13e-07</b> | <b>0.812(67390)</b> | <b>0.822(94015)</b>  | <b>-0.053</b> | <b>0.01</b> |
| Decode – Replication                               | 0        | 1.00        | 0.00519         | 0.839(1979)         | 0.847(142627)        | -0.045        | 0.05        |
| <b>PGC_SCZ wave3 (incl. wave2 and replication)</b> | <b>0</b> | <b>0.99</b> | <b>1.55e-08</b> | <b>0.813(69369)</b> | <b>0.837(236642)</b> | <b>-0.056</b> | <b>0.01</b> |

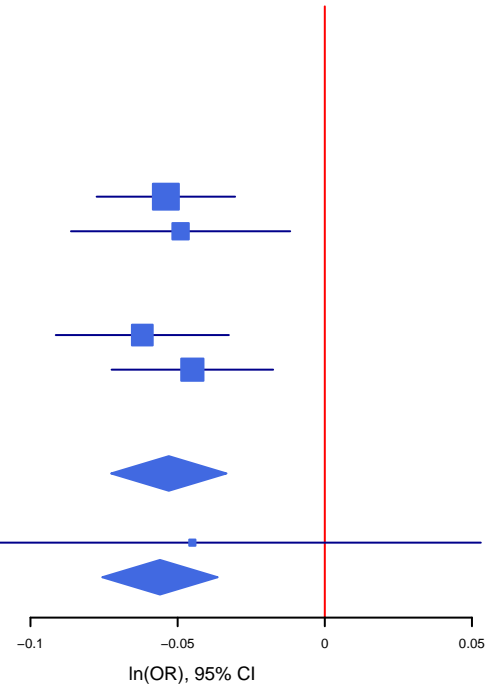

|                                                    |          |             |                 |                     |                      |              |              |
|----------------------------------------------------|----------|-------------|-----------------|---------------------|----------------------|--------------|--------------|
| rs62184960                                         | C/T      |             | 2:172974789     |                     |                      |              |              |
|                                                    | --       |             | het_P:          |                     | 0.826                | het_I:       | 0.0          |
|                                                    | ngt      | info        | p_value         | f_ca(n)             | f_co(n)              | ln(OR)       | STDerr       |
| PGC_SCZ wave3 eur only                             | 0        | 0.97        | 6.98e-09        | 0.859(53386)        | 0.855(77258)         | 0.073        | 0.012        |
| PGC_SCZ wave3 asn only                             | 0        | 0.83        | 0.731           | 0.968(14004)        | 0.966(16757)         | 0.018        | 0.054        |
| PGC_SCZ wave2 only                                 | 0        | 0.96        | 1.04e-05        | 0.869(34850)        | 0.863(44347)         | 0.072        | 0.016        |
| PGC_SCZ wave3 (excl. wave2)                        | 0        | 0.94        | 0.000264        | 0.895(32540)        | 0.886(49668)         | 0.067        | 0.018        |
| <b>PGC_SCZ wave3 (incl. wave2)</b>                 | <b>0</b> | <b>0.94</b> | <b>1.08e-08</b> | <b>0.882(67390)</b> | <b>0.875(94015)</b>  | <b>0.07</b>  | <b>0.012</b> |
| Decode - Replication                               | 0        | 1.00        | 0.787           | 0.859(1979)         | 0.898(142627)        | 0.067        | 0.058        |
| <b>PGC_SCZ wave3 (incl. wave2 and replication)</b> | <b>0</b> | <b>0.98</b> | <b>1.56e-08</b> | <b>0.881(69369)</b> | <b>0.889(236642)</b> | <b>0.067</b> | <b>0.012</b> |

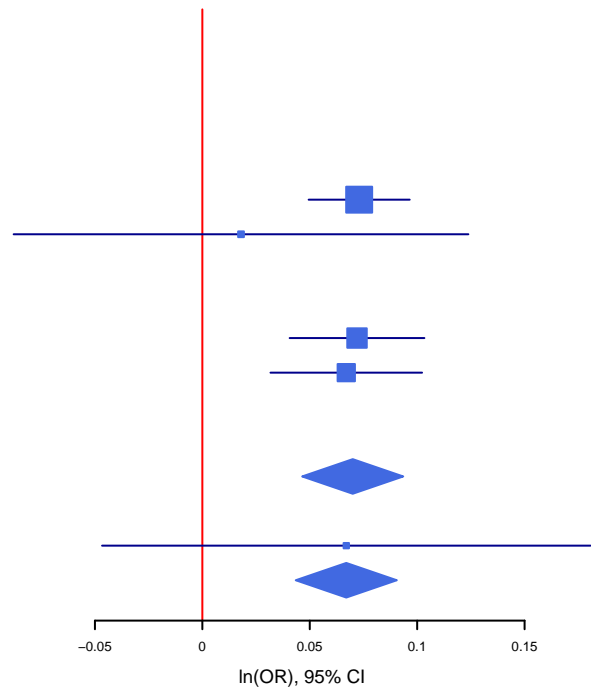

rs72761691

A/C

9:134786548

—

het\_P:

0.192

het\_I:

41.3

|  | ngt | info | p_value | f_ca(n) | f_co(n) | ln(OR) | STDerr |
|--|-----|------|---------|---------|---------|--------|--------|
|--|-----|------|---------|---------|---------|--------|--------|

PGC\_SCZ wave3 eur only

|   |      |          |              |              |        |       |
|---|------|----------|--------------|--------------|--------|-------|
| 1 | 0.93 | 2.19e-07 | 0.846(53386) | 0.853(77258) | -0.065 | 0.012 |
|---|------|----------|--------------|--------------|--------|-------|

PGC\_SCZ wave3 asn only

|   |      |        |              |              |        |       |
|---|------|--------|--------------|--------------|--------|-------|
| 0 | 0.84 | 0.0142 | 0.905(14004) | 0.911(16757) | -0.078 | 0.032 |
|---|------|--------|--------------|--------------|--------|-------|

PGC\_SCZ wave2 only

|   |      |          |             |              |        |       |
|---|------|----------|-------------|--------------|--------|-------|
| 1 | 0.94 | 0.000841 | 0.85(34850) | 0.853(44347) | -0.053 | 0.016 |
|---|------|----------|-------------|--------------|--------|-------|

PGC\_SCZ wave3 (excl. wave2)

|   |      |          |              |              |        |       |
|---|------|----------|--------------|--------------|--------|-------|
| 0 | 0.90 | 1.42e-06 | 0.867(32540) | 0.872(49668) | -0.083 | 0.017 |
|---|------|----------|--------------|--------------|--------|-------|

PGC\_SCZ wave3 (incl. wave2)

|   |      |          |              |              |        |       |
|---|------|----------|--------------|--------------|--------|-------|
| 1 | 0.92 | 1.07e-08 | 0.858(67390) | 0.863(94015) | -0.066 | 0.012 |
|---|------|----------|--------------|--------------|--------|-------|

Decode – Replication

|   |      |       |             |               |        |       |
|---|------|-------|-------------|---------------|--------|-------|
| 0 | 1.00 | 0.791 | 0.835(1979) | 0.839(142627) | -0.083 | 0.052 |
|---|------|-------|-------------|---------------|--------|-------|

PGC\_SCZ wave3 (incl. wave2 and replication)

|   |      |          |              |               |        |       |
|---|------|----------|--------------|---------------|--------|-------|
| 1 | 0.97 | 1.67e-08 | 0.857(69369) | 0.849(236642) | -0.064 | 0.011 |
|---|------|----------|--------------|---------------|--------|-------|

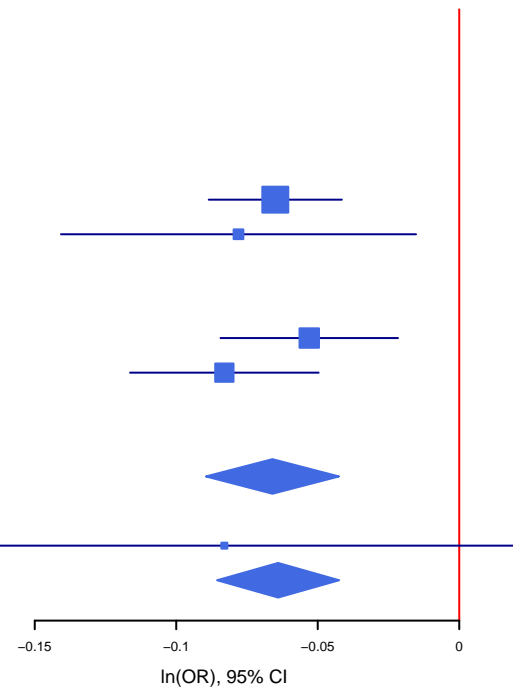

rs740076

A/G

5:137788607

—

het\_P:

0.94

het\_I:

0.0

ngt info p\_value f\_ca(n) f\_co(n) ln(OR) STDerr

PGC\_SCZ wave3 eur only

53 1.00 5.71e-06 0.551(53386) 0.561(77258) -0.039 0.009

PGC\_SCZ wave3 asn only

6 0.93 0.00141 0.766(14004) 0.782(16757) -0.067 0.021

PGC\_SCZ wave2 only

16 0.99 6.42e-05 0.56(34850) 0.564(44347) -0.044 0.011

PGC\_SCZ wave3 (excl. wave2)

43 0.98 0.000263 0.634(32540) 0.633(49668) -0.043 0.012

PGC\_SCZ wave3 (incl. wave2)

59 0.99 6.26e-08 0.596(67390) 0.601(94015) -0.043 0.008

Decode – Replication

0 1.00 0.0971 0.58(1979) 0.586(142627) -0.043 0.038

PGC\_SCZ wave3 (incl. wave2 and replication)

59 0.99 1.72e-08 0.596(69369) 0.592(236642) -0.044 0.008

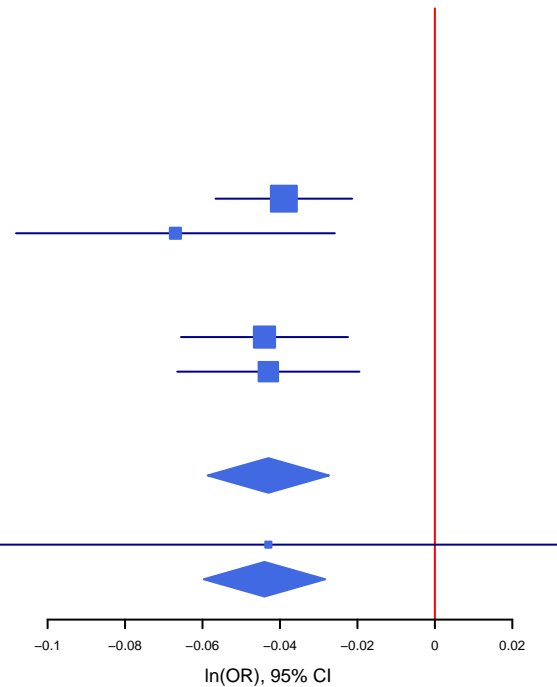

rs17104975

A/G

14:72428634

—

het\_P:

0.78

het\_I:

0.0

|  | ngt | info | p_value | f_ca(n) | f_co(n) | ln(OR) | STDerr |
|--|-----|------|---------|---------|---------|--------|--------|
|--|-----|------|---------|---------|---------|--------|--------|

PGC\_SCZ wave3 eur only

|   |      |          |              |             |        |      |
|---|------|----------|--------------|-------------|--------|------|
| 6 | 1.00 | 2.53e-08 | 0.731(53386) | 0.74(77258) | -0.054 | 0.01 |
|---|------|----------|--------------|-------------|--------|------|

PGC\_SCZ wave3 asn only

|   |      |       |              |              |        |      |
|---|------|-------|--------------|--------------|--------|------|
| 0 | 0.98 | 0.198 | 0.746(14004) | 0.748(16757) | -0.025 | 0.02 |
|---|------|-------|--------------|--------------|--------|------|

PGC\_SCZ wave2 only

|   |      |          |              |              |        |       |
|---|------|----------|--------------|--------------|--------|-------|
| 0 | 1.00 | 3.05e-05 | 0.729(34850) | 0.737(44347) | -0.051 | 0.012 |
|---|------|----------|--------------|--------------|--------|-------|

PGC\_SCZ wave3 (excl. wave2)

|   |      |          |             |              |        |       |
|---|------|----------|-------------|--------------|--------|-------|
| 6 | 0.99 | 0.000219 | 0.74(32540) | 0.745(49668) | -0.046 | 0.012 |
|---|------|----------|-------------|--------------|--------|-------|

PGC\_SCZ wave3 (incl. wave2)

|   |      |          |              |              |        |       |
|---|------|----------|--------------|--------------|--------|-------|
| 6 | 0.99 | 2.62e-08 | 0.734(67390) | 0.741(94015) | -0.049 | 0.009 |
|---|------|----------|--------------|--------------|--------|-------|

Decode – Replication

|   |      |       |             |               |        |       |
|---|------|-------|-------------|---------------|--------|-------|
| 0 | 1.00 | 0.284 | 0.759(1979) | 0.785(142627) | -0.046 | 0.045 |
|---|------|-------|-------------|---------------|--------|-------|

PGC\_SCZ wave3 (incl. wave2 and replication)

|   |      |          |              |               |        |       |
|---|------|----------|--------------|---------------|--------|-------|
| 6 | 1.00 | 1.74e-08 | 0.735(69369) | 0.768(236642) | -0.049 | 0.009 |
|---|------|----------|--------------|---------------|--------|-------|

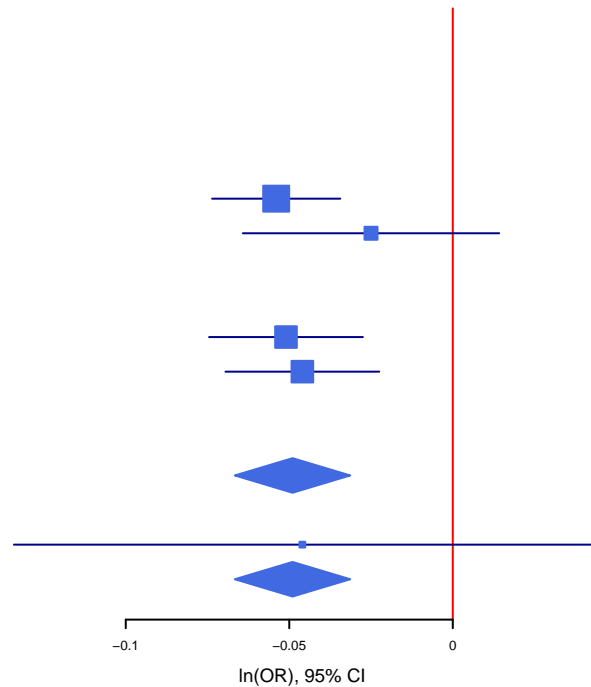

| rs7915131                                          | C/T       |             | 10:64418656     |                     |                      |              |              |
|----------------------------------------------------|-----------|-------------|-----------------|---------------------|----------------------|--------------|--------------|
|                                                    | --        |             | het_P:          |                     | 0.535                | het_I:       | 0.0          |
|                                                    | ngt       | info        | p_value         | f_ca(n)             | f_co(n)              | ln(OR)       | STDerr       |
| PGC_SCZ wave3 eur only                             | 36        | 0.99        | 7.26e-08        | 0.445(53386)        | 0.436(77258)         | 0.047        | 0.009        |
| PGC_SCZ wave3 asn only                             | 6         | 0.99        | 0.164           | 0.349(14004)        | 0.344(16757)         | 0.025        | 0.018        |
| PGC_SCZ wave2 only                                 | 35        | 0.99        | 1.51e-05        | 0.438(34850)        | 0.433(44347)         | 0.047        | 0.011        |
| PGC_SCZ wave3 (excl. wave2)                        | 7         | 0.99        | 0.000739        | 0.411(32540)        | 0.407(49668)         | 0.038        | 0.011        |
| <b>PGC_SCZ wave3 (incl. wave2)</b>                 | <b>42</b> | <b>0.99</b> | <b>4.94e-08</b> | <b>0.425(67390)</b> | <b>0.42(94015)</b>   | <b>0.043</b> | <b>0.008</b> |
| Decode – Replication                               | 0         | 1.00        | 0.18            | 0.441(1979)         | 0.471(142627)        | 0.038        | 0.038        |
| <b>PGC_SCZ wave3 (incl. wave2 and replication)</b> | <b>42</b> | <b>1.00</b> | <b>1.79e-08</b> | <b>0.425(69369)</b> | <b>0.451(236642)</b> | <b>0.043</b> | <b>0.008</b> |

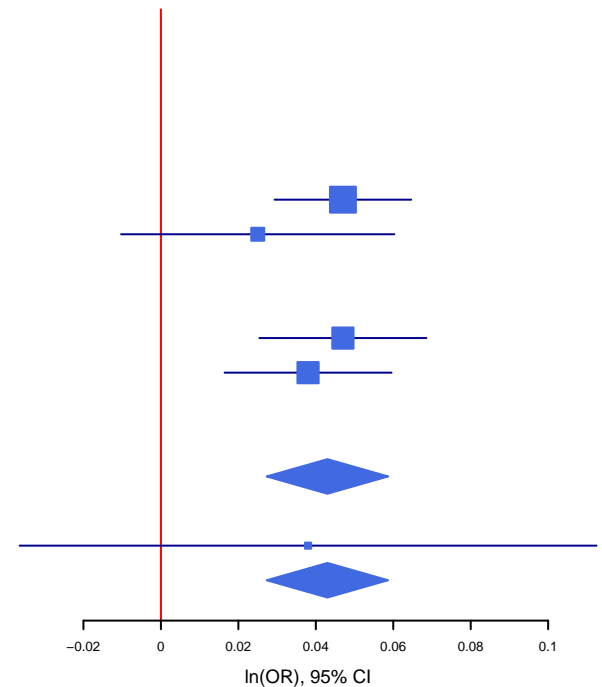

| <b>rs2806737</b>                                   | <b>C/T</b> |             | <b>13:54298029</b> |                     |                      |              |              |
|----------------------------------------------------|------------|-------------|--------------------|---------------------|----------------------|--------------|--------------|
|                                                    | --         |             | het_P:             | 0.596               | het_I:               | 0.0          |              |
|                                                    | ngt        | info        | p_value            | f_ca(n)             | f_co(n)              | ln(OR)       | STDerr       |
| PGC_SCZ wave3 eur only                             | 0          | 1.00        | 1.46e-06           | 0.209(53386)        | 0.201(77258)         | 0.051        | 0.011        |
| PGC_SCZ wave3 asn only                             | 0          | 0.99        | 0.0236             | 0.23(14004)         | 0.222(16757)         | 0.046        | 0.02         |
| PGC_SCZ wave2 only                                 | 0          | 1.00        | 0.000741           | 0.209(34850)        | 0.2(44347)           | 0.045        | 0.013        |
| PGC_SCZ wave3 (excl. wave2)                        | 0          | 0.99        | 3.43e-05           | 0.218(32540)        | 0.21(49668)          | 0.055        | 0.013        |
| <b>PGC_SCZ wave3 (incl. wave2)</b>                 | <b>0</b>   | <b>1.00</b> | <b>1.06e-07</b>    | <b>0.213(67390)</b> | <b>0.205(94015)</b>  | <b>0.05</b>  | <b>0.009</b> |
| Decode - Replication                               | 0          | 1.00        | 0.0418             | 0.196(1979)         | 0.202(142627)        | 0.055        | 0.047        |
| <b>PGC_SCZ wave3 (incl. wave2 and replication)</b> | <b>0</b>   | <b>1.00</b> | <b>1.83e-08</b>    | <b>0.213(69369)</b> | <b>0.203(236642)</b> | <b>0.052</b> | <b>0.009</b> |

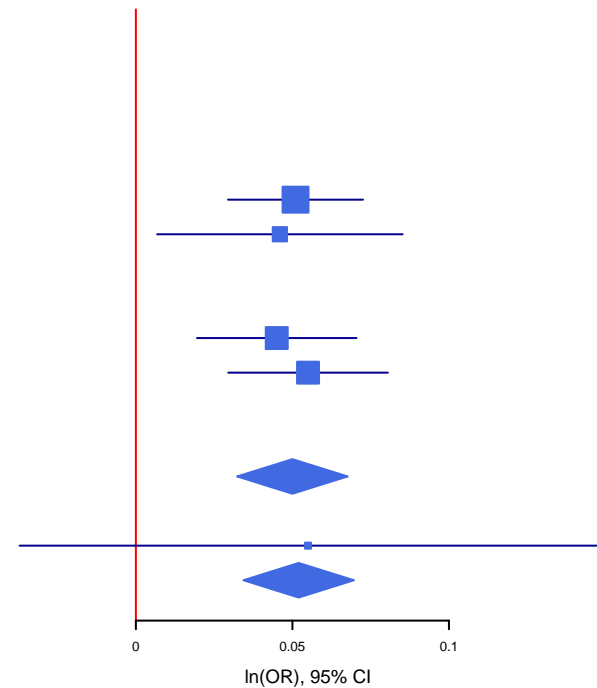

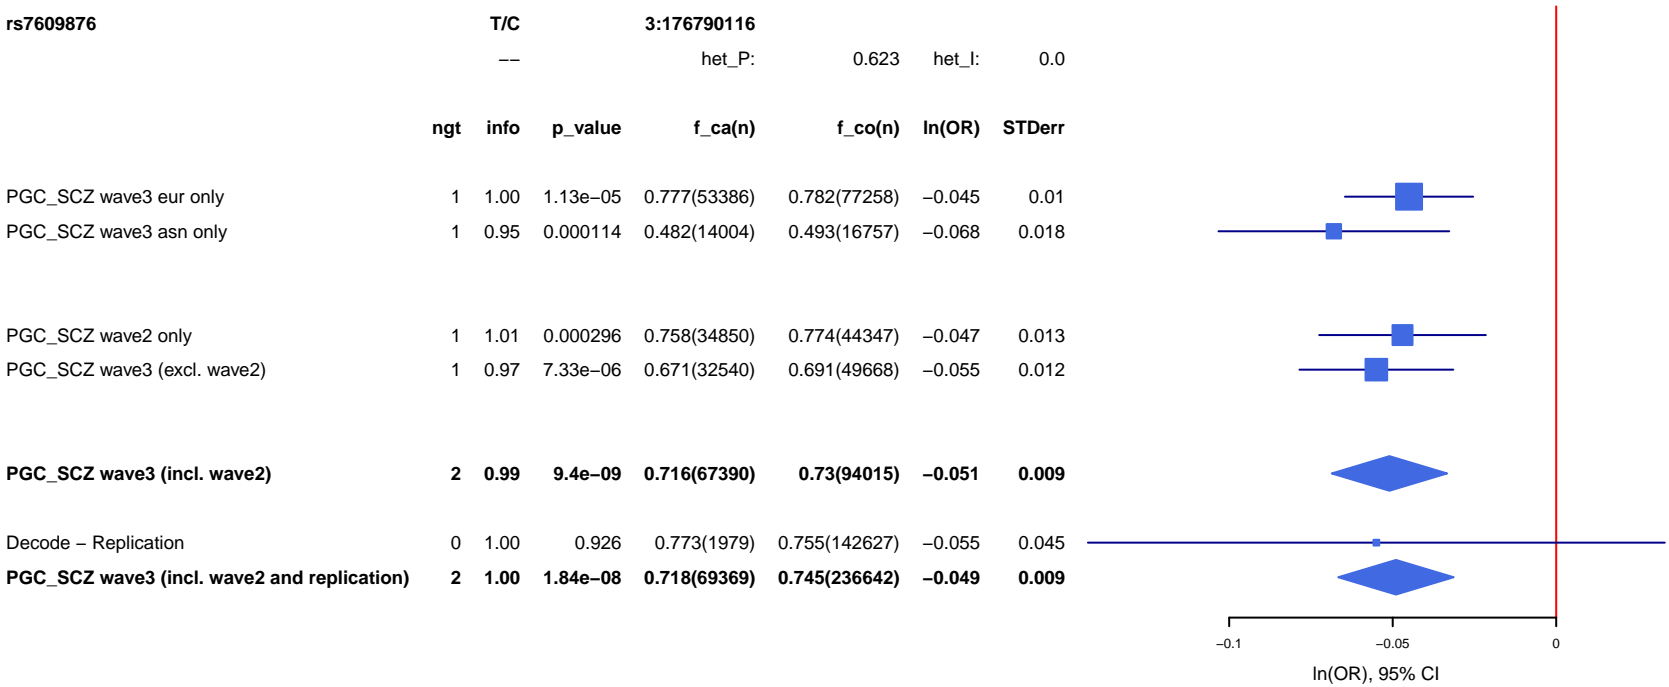



rs9891739

|     |                         |
|-----|-------------------------|
| C/T | 17:19942177             |
| ++  | het_P: 0.891 het_I: 0.0 |

|  | ngt | info | p_value | f_ca(n) | f_co(n) | ln(OR) | STDerr |
|--|-----|------|---------|---------|---------|--------|--------|
|--|-----|------|---------|---------|---------|--------|--------|

|                        |   |      |          |              |              |       |       |
|------------------------|---|------|----------|--------------|--------------|-------|-------|
| PGC_SCZ wave3 eur only | 6 | 0.99 | 2.98e-06 | 0.475(53386) | 0.485(77258) | -0.04 | 0.009 |
|------------------------|---|------|----------|--------------|--------------|-------|-------|

|                        |   |      |          |             |              |        |       |
|------------------------|---|------|----------|-------------|--------------|--------|-------|
| PGC_SCZ wave3 asn only | 0 | 0.95 | 0.000685 | 0.78(14004) | 0.792(16757) | -0.074 | 0.022 |
|------------------------|---|------|----------|-------------|--------------|--------|-------|

|                    |   |      |          |              |              |        |       |
|--------------------|---|------|----------|--------------|--------------|--------|-------|
| PGC_SCZ wave2 only | 0 | 0.99 | 2.71e-05 | 0.495(34850) | 0.497(44347) | -0.046 | 0.011 |
|--------------------|---|------|----------|--------------|--------------|--------|-------|

|                             |   |      |          |              |              |        |       |
|-----------------------------|---|------|----------|--------------|--------------|--------|-------|
| PGC_SCZ wave3 (excl. wave2) | 6 | 0.97 | 0.000211 | 0.585(32540) | 0.578(49668) | -0.044 | 0.012 |
|-----------------------------|---|------|----------|--------------|--------------|--------|-------|

|                                    |          |             |                 |                     |                    |               |              |
|------------------------------------|----------|-------------|-----------------|---------------------|--------------------|---------------|--------------|
| <b>PGC_SCZ wave3 (incl. wave2)</b> | <b>6</b> | <b>0.98</b> | <b>2.18e-08</b> | <b>0.539(67390)</b> | <b>0.54(94015)</b> | <b>-0.045</b> | <b>0.008</b> |
|------------------------------------|----------|-------------|-----------------|---------------------|--------------------|---------------|--------------|

|                      |   |      |       |             |               |        |       |
|----------------------|---|------|-------|-------------|---------------|--------|-------|
| Decode - Replication | 0 | 1.00 | 0.594 | 0.474(1979) | 0.451(142627) | -0.044 | 0.042 |
|----------------------|---|------|-------|-------------|---------------|--------|-------|

|                                                    |          |             |                 |                     |                      |               |              |
|----------------------------------------------------|----------|-------------|-----------------|---------------------|----------------------|---------------|--------------|
| <b>PGC_SCZ wave3 (incl. wave2 and replication)</b> | <b>6</b> | <b>0.99</b> | <b>1.85e-08</b> | <b>0.537(69369)</b> | <b>0.486(236642)</b> | <b>-0.044</b> | <b>0.008</b> |
|----------------------------------------------------|----------|-------------|-----------------|---------------------|----------------------|---------------|--------------|

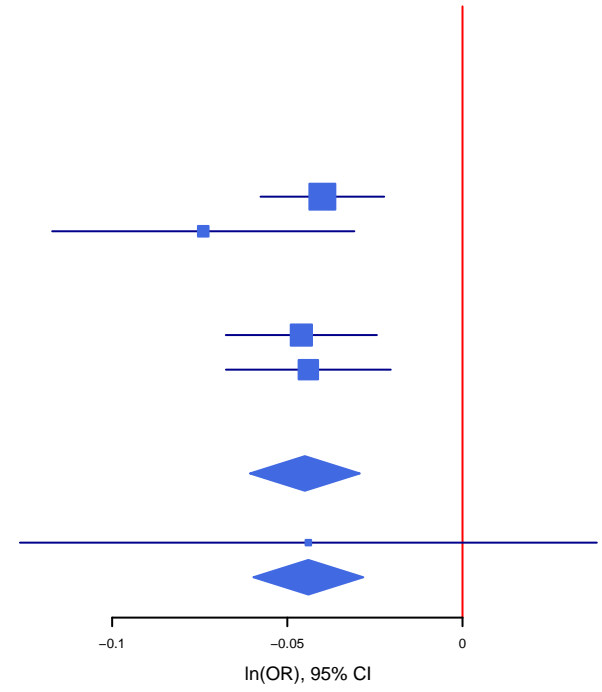

rs72723227

G/A

5:7245664

—

het\_P:

0.489

het\_I:

0.0

|  | ngt | info | p_value | f_ca(n) | f_co(n) | ln(OR) | STDerr |
|--|-----|------|---------|---------|---------|--------|--------|
|--|-----|------|---------|---------|---------|--------|--------|

PGC\_SCZ wave3 eur only

|   |      |          |              |              |       |       |
|---|------|----------|--------------|--------------|-------|-------|
| 0 | 0.99 | 2.52e-07 | 0.682(53386) | 0.673(77258) | 0.048 | 0.009 |
|---|------|----------|--------------|--------------|-------|-------|

PGC\_SCZ wave3 asn only

|   |      |        |              |              |       |       |
|---|------|--------|--------------|--------------|-------|-------|
| 0 | 0.97 | 0.0053 | 0.577(14004) | 0.568(16757) | 0.049 | 0.017 |
|---|------|--------|--------------|--------------|-------|-------|

PGC\_SCZ wave2 only

|   |      |          |              |              |       |       |
|---|------|----------|--------------|--------------|-------|-------|
| 0 | 0.98 | 0.000315 | 0.676(34850) | 0.673(44347) | 0.042 | 0.012 |
|---|------|----------|--------------|--------------|-------|-------|

PGC\_SCZ wave3 (excl. wave2)

|   |      |          |              |              |       |       |
|---|------|----------|--------------|--------------|-------|-------|
| 0 | 0.99 | 2.93e-06 | 0.644(32540) | 0.638(49668) | 0.054 | 0.011 |
|---|------|----------|--------------|--------------|-------|-------|

**PGC\_SCZ wave3 (incl. wave2)**

|          |             |                 |                    |                     |              |              |
|----------|-------------|-----------------|--------------------|---------------------|--------------|--------------|
| <b>0</b> | <b>0.98</b> | <b>4.58e-09</b> | <b>0.66(67390)</b> | <b>0.654(94015)</b> | <b>0.048</b> | <b>0.008</b> |
|----------|-------------|-----------------|--------------------|---------------------|--------------|--------------|

Decode – Replication

|   |      |       |             |               |       |      |
|---|------|-------|-------------|---------------|-------|------|
| 0 | 1.00 | 0.568 | 0.677(1979) | 0.682(142627) | 0.054 | 0.04 |
|---|------|-------|-------------|---------------|-------|------|

**PGC\_SCZ wave3 (incl. wave2 and replication)**

|          |             |                 |                    |                      |              |              |
|----------|-------------|-----------------|--------------------|----------------------|--------------|--------------|
| <b>0</b> | <b>0.99</b> | <b>1.87e-08</b> | <b>0.66(69369)</b> | <b>0.671(236642)</b> | <b>0.045</b> | <b>0.008</b> |
|----------|-------------|-----------------|--------------------|----------------------|--------------|--------------|

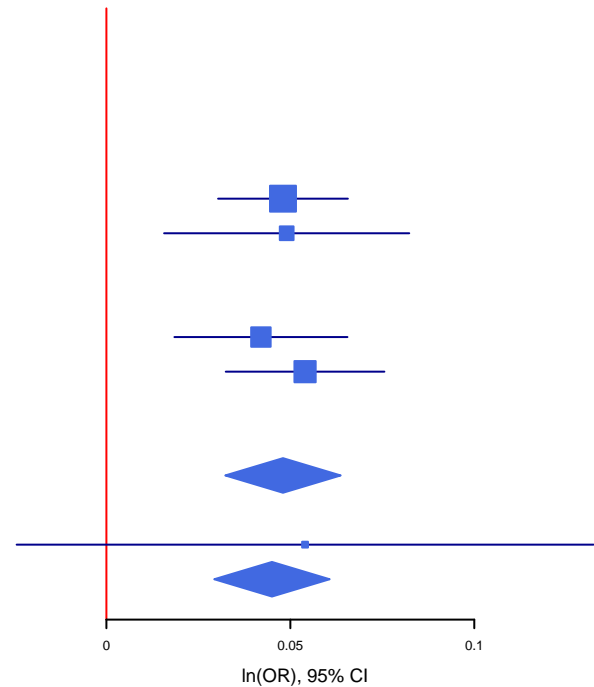

| rs7953300                                          | G/T      |             | 12:92254654     |                     |                      |               |              |
|----------------------------------------------------|----------|-------------|-----------------|---------------------|----------------------|---------------|--------------|
|                                                    | ++       |             | het_P:          | 0.138               | het_I:               | 54.4          |              |
|                                                    | ngt      | info        | p_value         | f_ca(n)             | f_co(n)              | ln(OR)        | STDerr       |
| PGC_SCZ wave3 eur only                             | 0        | 0.99        | 1.11e-07        | 0.374(53386)        | 0.381(77258)         | -0.047        | 0.009        |
| PGC_SCZ wave3 asn only                             | 0        | 0.97        | 0.114           | 0.232(14004)        | 0.236(16757)         | -0.032        | 0.02         |
| PGC_SCZ wave2 only                                 | 0        | 0.99        | 6.11e-07        | 0.363(34850)        | 0.377(44347)         | -0.056        | 0.011        |
| PGC_SCZ wave3 (excl. wave2)                        | 0        | 0.99        | 0.00618         | 0.324(32540)        | 0.336(49668)         | -0.032        | 0.012        |
| <b>PGC_SCZ wave3 (incl. wave2)</b>                 | <b>0</b> | <b>0.99</b> | <b>3.93e-08</b> | <b>0.344(67390)</b> | <b>0.355(94015)</b>  | <b>-0.045</b> | <b>0.008</b> |
| Decode – Replication                               | 0        | 1.00        | 0.201           | 0.413(1979)         | 0.377(142627)        | -0.032        | 0.039        |
| <b>PGC_SCZ wave3 (incl. wave2 and replication)</b> | <b>0</b> | <b>0.99</b> | <b>1.89e-08</b> | <b>0.346(69369)</b> | <b>0.368(236642)</b> | <b>-0.045</b> | <b>0.008</b> |

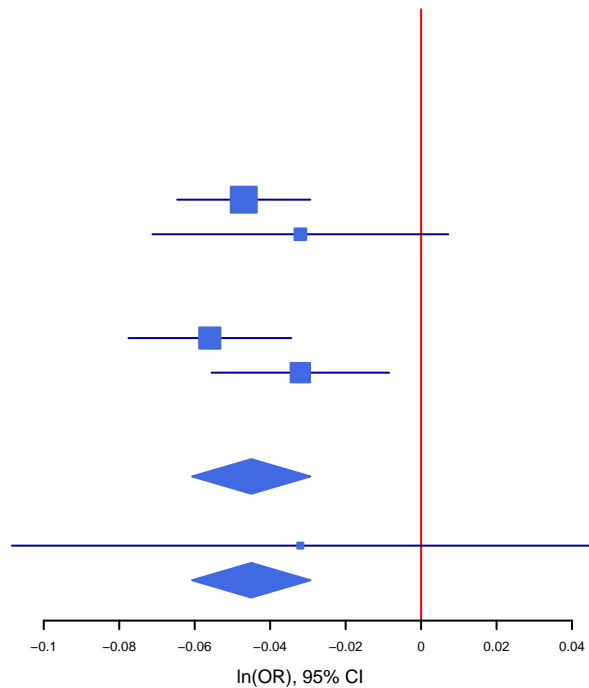

| rs1506297                                          | T/C      |             | 3:30072307      |                     |                      |              |              |
|----------------------------------------------------|----------|-------------|-----------------|---------------------|----------------------|--------------|--------------|
|                                                    | ++       |             | het_P:          | 0.29                | het_I:               | 10.5         |              |
|                                                    | ngt      | info        | p_value         | f_ca(n)             | f_co(n)              | ln(OR)       | STDerr       |
| PGC_SCZ wave3 eur only                             | 8        | 1.00        | 5.25e-08        | 0.684(53386)        | 0.673(77258)         | 0.05         | 0.009        |
| PGC_SCZ wave3 asn only                             | 1        | 0.89        | 0.144           | 0.97(14004)         | 0.968(16757)         | 0.076        | 0.052        |
| PGC_SCZ wave2 only                                 | 1        | 1.00        | 5.53e-07        | 0.699(34850)        | 0.677(44347)         | 0.059        | 0.012        |
| PGC_SCZ wave3 (excl. wave2)                        | 8        | 0.96        | 0.00593         | 0.792(32540)        | 0.768(49668)         | 0.039        | 0.014        |
| <b>PGC_SCZ wave3 (incl. wave2)</b>                 | <b>9</b> | <b>0.98</b> | <b>1.98e-08</b> | <b>0.744(67390)</b> | <b>0.725(94015)</b>  | <b>0.051</b> | <b>0.009</b> |
| Decode – Replication                               | 0        | 1.00        | 0.523           | 0.696(1979)         | 0.691(142627)        | 0.039        | 0.04         |
| <b>PGC_SCZ wave3 (incl. wave2 and replication)</b> | <b>9</b> | <b>0.99</b> | <b>1.93e-08</b> | <b>0.743(69369)</b> | <b>0.705(236642)</b> | <b>0.05</b>  | <b>0.009</b> |

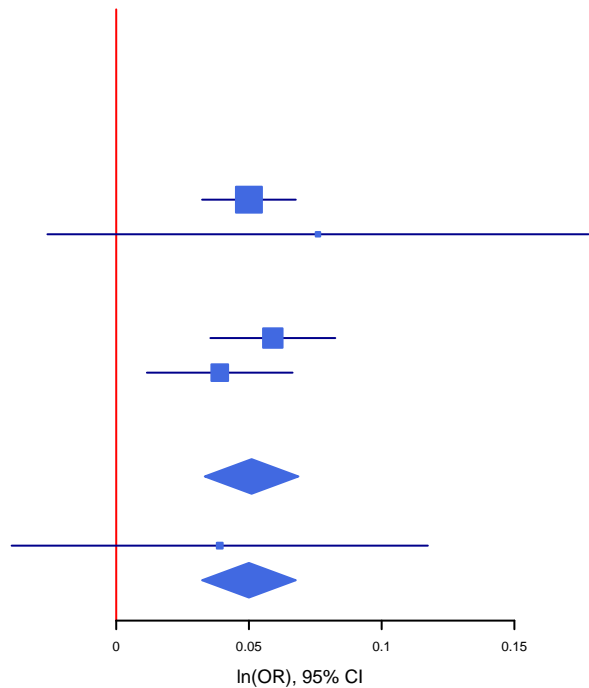

rs79445414

T/C

8:33863561

—

het\_P:

0.23

het\_I:

30.5

| ngt | info | p_value | f_ca(n) | f_co(n) | ln(OR) | STDerr |
|-----|------|---------|---------|---------|--------|--------|
|-----|------|---------|---------|---------|--------|--------|

PGC\_SCZ wave3 eur only

|   |      |         |              |             |        |       |
|---|------|---------|--------------|-------------|--------|-------|
| 6 | 0.93 | 2.8e-08 | 0.956(53386) | 0.96(77258) | -0.123 | 0.022 |
|---|------|---------|--------------|-------------|--------|-------|

PGC\_SCZ wave3 asn only

|     |     |     |          |          |     |     |
|-----|-----|-----|----------|----------|-----|-----|
| nan | nan | nan | nan(nan) | nan(nan) | nan | nan |
|-----|-----|-----|----------|----------|-----|-----|

PGC\_SCZ wave2 only

|   |      |          |              |             |        |       |
|---|------|----------|--------------|-------------|--------|-------|
| 1 | 0.94 | 3.56e-07 | 0.956(32998) | 0.96(43387) | -0.145 | 0.028 |
|---|------|----------|--------------|-------------|--------|-------|

PGC\_SCZ wave3 (excl. wave2)

|   |      |        |              |              |       |       |
|---|------|--------|--------------|--------------|-------|-------|
| 5 | 0.92 | 0.0109 | 0.958(20935) | 0.959(34411) | -0.09 | 0.036 |
|---|------|--------|--------------|--------------|-------|-------|

PGC\_SCZ wave3 (incl. wave2)

|   |      |          |              |             |        |       |
|---|------|----------|--------------|-------------|--------|-------|
| 6 | 0.93 | 2.63e-08 | 0.956(53933) | 0.96(77798) | -0.124 | 0.022 |
|---|------|----------|--------------|-------------|--------|-------|

Decode – Replication

|   |      |       |             |               |       |       |
|---|------|-------|-------------|---------------|-------|-------|
| 0 | 1.00 | 0.359 | 0.959(1979) | 0.935(142627) | -0.09 | 0.087 |
|---|------|-------|-------------|---------------|-------|-------|

PGC\_SCZ wave3 (incl. wave2 and replication)

|   |      |          |              |               |        |       |
|---|------|----------|--------------|---------------|--------|-------|
| 6 | 0.97 | 1.94e-08 | 0.956(55912) | 0.944(220425) | -0.121 | 0.022 |
|---|------|----------|--------------|---------------|--------|-------|

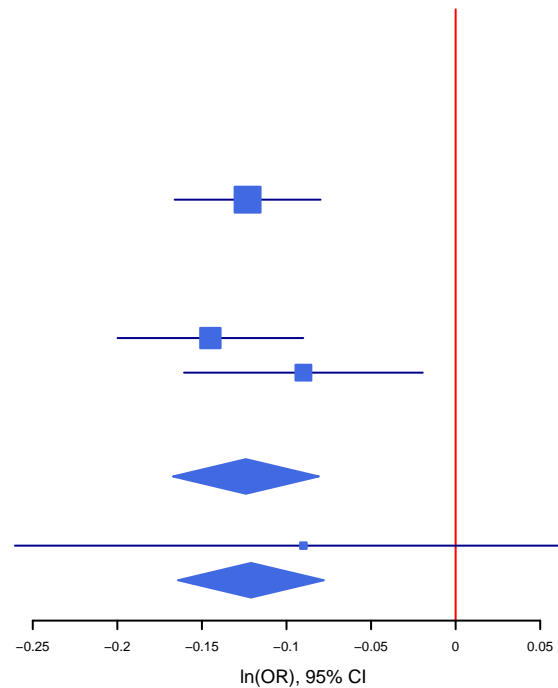

rs28521069

C/T  
++  
4:118852986  
het\_P: 0.764  
het\_I: 0.0

|                                                    | ngt      | info        | p_value         | f_ca(n)             | f_co(n)              | ln(OR)        | STDerr       |
|----------------------------------------------------|----------|-------------|-----------------|---------------------|----------------------|---------------|--------------|
| PGC_SCZ wave3 eur only                             | 0        | 1.00        | 3.29e-06        | 0.67(53386)         | 0.681(77258)         | -0.043        | 0.009        |
| PGC_SCZ wave3 asn only                             | 0        | 0.98        | 0.0024          | 0.739(14004)        | 0.751(16757)         | -0.059        | 0.02         |
| PGC_SCZ wave2 only                                 | 0        | 1.00        | 0.000198        | 0.676(34850)        | 0.686(44347)         | -0.043        | 0.012        |
| PGC_SCZ wave3 (excl. wave2)                        | 0        | 0.99        | 4.87e-05        | 0.693(32540)        | 0.7(49668)           | -0.048        | 0.012        |
| <b>PGC_SCZ wave3 (incl. wave2)</b>                 | <b>0</b> | <b>0.99</b> | <b>3.78e-08</b> | <b>0.684(67390)</b> | <b>0.693(94015)</b>  | <b>-0.046</b> | <b>0.008</b> |
| Decode - Replication                               | 0        | 1.00        | 0.269           | 0.665(1979)         | 0.66(142627)         | -0.048        | 0.04         |
| <b>PGC_SCZ wave3 (incl. wave2 and replication)</b> | <b>0</b> | <b>1.00</b> | <b>1.96e-08</b> | <b>0.683(69369)</b> | <b>0.673(236642)</b> | <b>-0.046</b> | <b>0.008</b> |

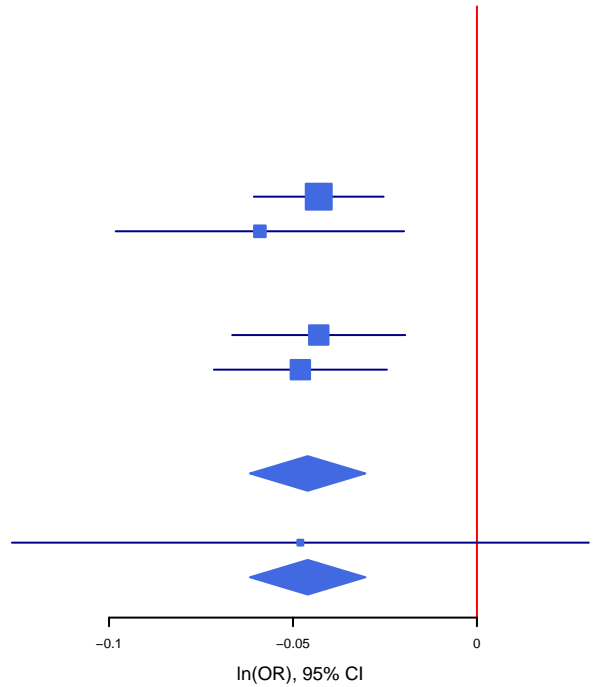

rs35045093

A/C 7:127738471  
++ het\_P: 0.507 het\_I: 0.0

|                                             | ngt | info | p_value  | f_ca(n)      | f_co(n)       | ln(OR) | STDerr |
|---------------------------------------------|-----|------|----------|--------------|---------------|--------|--------|
| PGC_SCZ wave3 eur only                      | 0   | 0.98 | 4.41e-07 | 0.826(53386) | 0.82(77258)   | 0.058  | 0.011  |
| PGC_SCZ wave3 asn only                      | 0   | 0.91 | 0.025    | 0.829(14004) | 0.825(16757)  | 0.052  | 0.023  |
| PGC_SCZ wave2 only                          | 0   | 0.98 | 1.06e-05 | 0.827(34850) | 0.819(44347)  | 0.063  | 0.014  |
| PGC_SCZ wave3 (excl. wave2)                 | 0   | 0.95 | 0.000686 | 0.827(32540) | 0.822(49668)  | 0.05   | 0.015  |
| PGC_SCZ wave3 (incl. wave2)                 | 0   | 0.96 | 3.36e-08 | 0.827(67390) | 0.821(94015)  | 0.057  | 0.01   |
| Decode – Replication                        | 0   | 1.00 | 0.258    | 0.814(1979)  | 0.859(142627) | 0.05   | 0.052  |
| PGC_SCZ wave3 (incl. wave2 and replication) | 0   | 0.99 | 2.02e-08 | 0.827(69369) | 0.844(236642) | 0.057  | 0.01   |

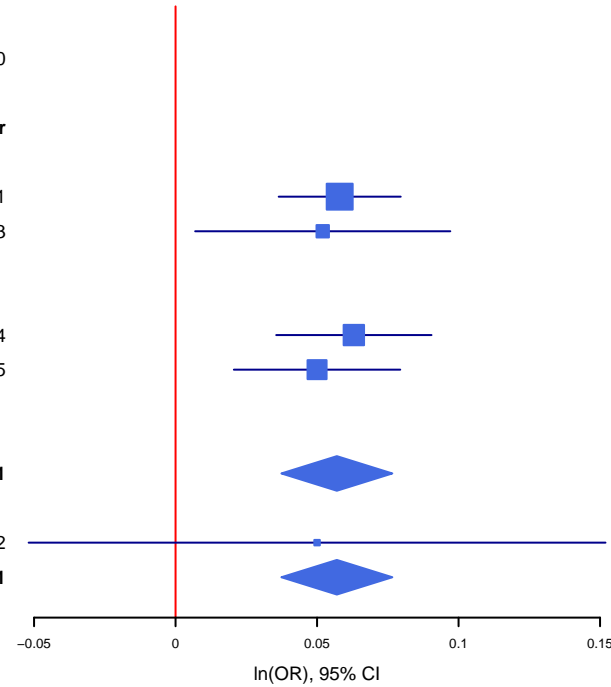

|                                                    |          |             |                 |                     |                      |              |              |
|----------------------------------------------------|----------|-------------|-----------------|---------------------|----------------------|--------------|--------------|
| rs1901512                                          | T/C      |             | 5:101723875     |                     |                      |              |              |
|                                                    | ++       |             | het_P:          | 0.312               | het_I:               | 2.2          |              |
|                                                    | ngt      | info        | p_value         | f_ca(n)             | f_co(n)              | ln(OR)       | STDerr       |
| PGC_SCZ wave3 eur only                             | 7        | 0.97        | 5.72e-10        | 0.318(53386)        | 0.301(77258)         | 0.058        | 0.009        |
| PGC_SCZ wave3 asn only                             | 0        | 0.92        | 0.597           | 0.49(14004)         | 0.495(16757)         | -0.009       | 0.018        |
| PGC_SCZ wave2 only                                 | 1        | 0.97        | 1.29e-05        | 0.319(34850)        | 0.301(44347)         | 0.052        | 0.012        |
| PGC_SCZ wave3 (excl. wave2)                        | 6        | 0.96        | 0.00242         | 0.391(32540)        | 0.366(49668)         | 0.035        | 0.012        |
| <b>PGC_SCZ wave3 (incl. wave2)</b>                 | <b>7</b> | <b>0.96</b> | <b>1.81e-07</b> | <b>0.354(67390)</b> | <b>0.335(94015)</b>  | <b>0.043</b> | <b>0.008</b> |
| Decode – Replication                               | 0        | 1.00        | 0.0142          | 0.305(1979)         | 0.259(142627)        | 0.035        | 0.042        |
| <b>PGC_SCZ wave3 (incl. wave2 and replication)</b> | <b>7</b> | <b>0.98</b> | <b>2.05e-08</b> | <b>0.353(69369)</b> | <b>0.289(236642)</b> | <b>0.046</b> | <b>0.008</b> |

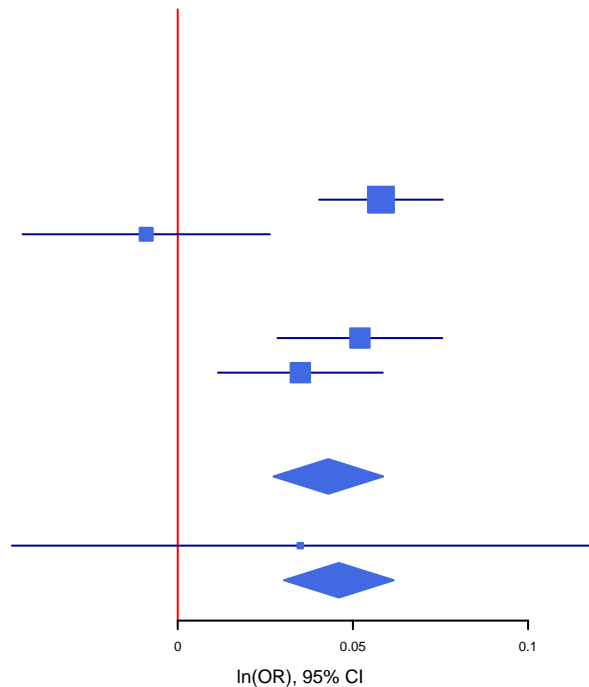



|                                                    |           |             |                 |                     |                      |               |              |
|----------------------------------------------------|-----------|-------------|-----------------|---------------------|----------------------|---------------|--------------|
| rs352935                                           | C/T       |             | 16:89648580     |                     |                      |               |              |
|                                                    | ++        |             | het_P:          | 0.226               | het_I:               | 31.9          |              |
|                                                    | ngt       | info        | p_value         | f_ca(n)             | f_co(n)              | ln(OR)        | STDerr       |
| PGC_SCZ wave3 eur only                             | 74        | 0.99        | 3.55e-08        | 0.478(53386)        | 0.494(77258)         | -0.048        | 0.009        |
| PGC_SCZ wave3 asn only                             | 11        | 0.97        | 0.398           | 0.854(14004)        | 0.863(16757)         | -0.021        | 0.025        |
| PGC_SCZ wave2 only                                 | 46        | 0.99        | 9.76e-07        | 0.502(34850)        | 0.506(44347)         | -0.054        | 0.011        |
| PGC_SCZ wave3 (excl. wave2)                        | 39        | 0.98        | 0.00585         | 0.614(32540)        | 0.608(49668)         | -0.034        | 0.012        |
| <b>PGC_SCZ wave3 (incl. wave2)</b>                 | <b>85</b> | <b>0.98</b> | <b>4.06e-08</b> | <b>0.556(67390)</b> | <b>0.56(94015)</b>   | <b>-0.045</b> | <b>0.008</b> |
| Decode – Replication                               | 0         | 1.00        | 0.254           | 0.468(1979)         | 0.528(142627)        | -0.034        | 0.038        |
| <b>PGC_SCZ wave3 (incl. wave2 and replication)</b> | <b>85</b> | <b>0.99</b> | <b>2.09e-08</b> | <b>0.553(69369)</b> | <b>0.541(236642)</b> | <b>-0.045</b> | <b>0.008</b> |

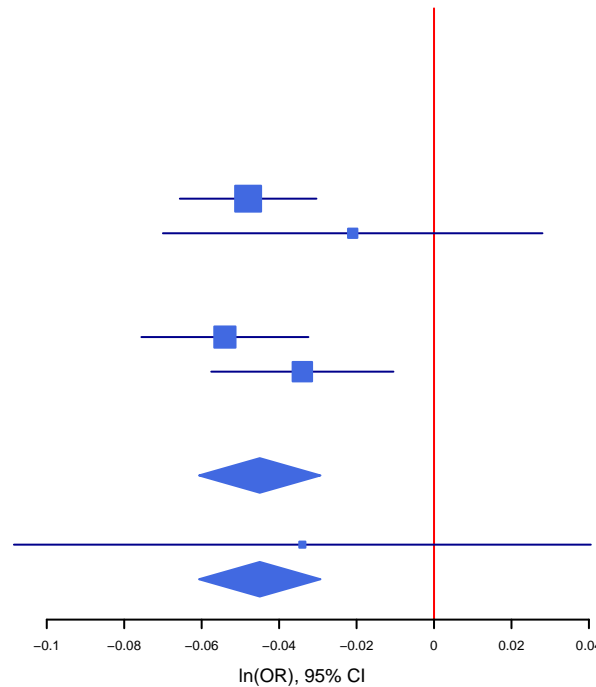

rs7699241 C/T 4:166204489  
++ het\_P: 0.341 het\_I: 0.0

|                                             | ngt | info | p_value  | f_ca(n)      | f_co(n)       | ln(OR) | STDerr |
|---------------------------------------------|-----|------|----------|--------------|---------------|--------|--------|
| PGC_SCZ wave3 eur only                      | 0   | 0.97 | 2.05e-07 | 0.903(53386) | 0.909(77258)  | -0.078 | 0.015  |
| PGC_SCZ wave3 asn only                      | 0   | 0.95 | 0.0849   | 0.842(14004) | 0.843(16757)  | -0.041 | 0.024  |
| PGC_SCZ wave2 only                          | 0   | 0.99 | 0.00324  | 0.902(34850) | 0.907(44347)  | -0.055 | 0.019  |
| PGC_SCZ wave3 (excl. wave2)                 | 0   | 0.95 | 5.98e-06 | 0.879(32540) | 0.889(49668)  | -0.079 | 0.018  |
| PGC_SCZ wave3 (incl. wave2)                 | 0   | 0.97 | 1.07e-07 | 0.891(67390) | 0.897(94015)  | -0.068 | 0.013  |
| Decode - Replication                        | 0   | 1.00 | 0.0542   | 0.899(1979)  | 0.901(142627) | -0.079 | 0.062  |
| PGC_SCZ wave3 (incl. wave2 and replication) | 0   | 0.99 | 2.11e-08 | 0.891(69369) | 0.899(236642) | -0.07  | 0.012  |

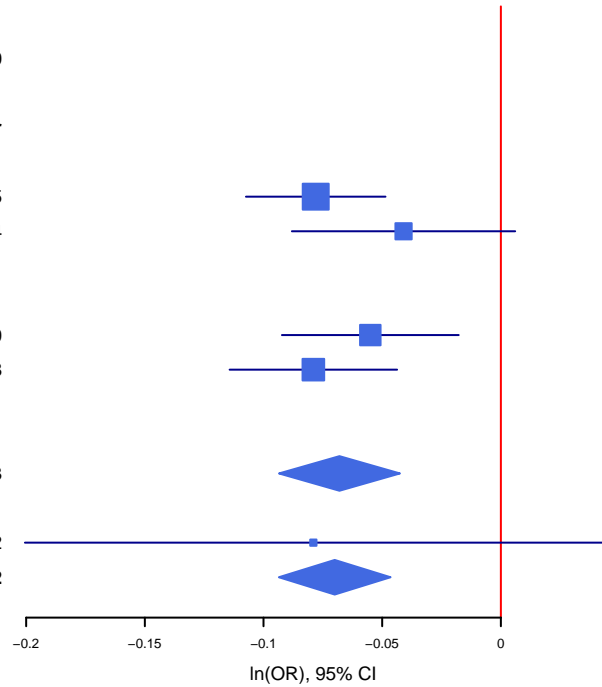

| rs133047                                           | T/C       |             | 22:41027819     |                   |                     |              |              |
|----------------------------------------------------|-----------|-------------|-----------------|-------------------|---------------------|--------------|--------------|
|                                                    | ++        |             | het_P:          | 0.002             | het_I:              | 89.9         |              |
|                                                    | ngt       | info        | p_value         | f_ca(n)           | f_co(n)             | ln(OR)       | STDerr       |
| PGC_SCZ wave3 eur only                             | 63        | 0.97        | 3.18e-08        | 0.108(53386)      | 0.103(77258)        | 0.079        | 0.014        |
| PGC_SCZ wave3 asn only                             | nan       | nan         | nan             | nan(nan)          | nan(nan)            | nan          | nan          |
| PGC_SCZ wave2 only                                 | 28        | 0.94        | 2.41e-10        | 0.11(32998)       | 0.1(43387)          | 0.117        | 0.018        |
| PGC_SCZ wave3 (excl. wave2)                        | 40        | 0.98        | 0.218           | 0.087(25672)      | 0.091(41133)        | 0.027        | 0.022        |
| <b>PGC_SCZ wave3 (incl. wave2)</b>                 | <b>68</b> | <b>0.96</b> | <b>1.73e-08</b> | <b>0.1(58670)</b> | <b>0.096(84520)</b> | <b>0.08</b>  | <b>0.014</b> |
| Decode – Replication                               | 0         | 1.00        | 0.606           | 0.09(1979)        | 0.119(142627)       | 0.027        | 0.063        |
| <b>PGC_SCZ wave3 (incl. wave2 and replication)</b> | <b>68</b> | <b>0.99</b> | <b>2.12e-08</b> | <b>0.1(60649)</b> | <b>0.11(227147)</b> | <b>0.078</b> | <b>0.014</b> |

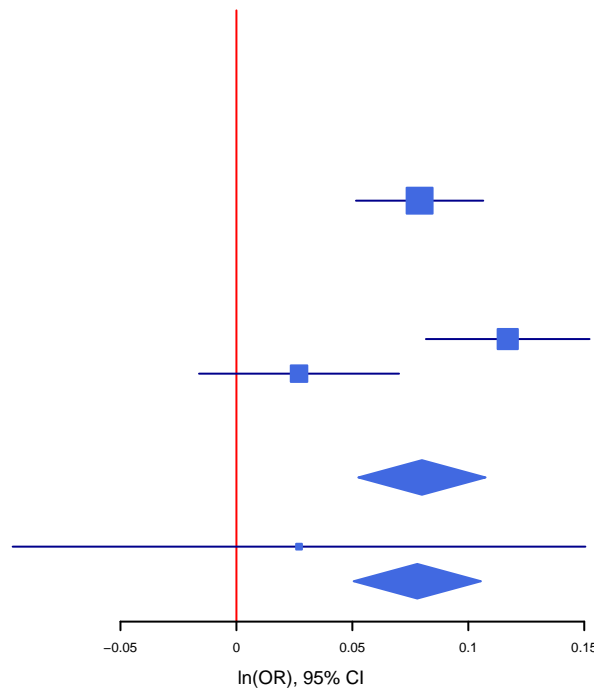

|                                                    |           |             |                 |                     |                      |               |              |
|----------------------------------------------------|-----------|-------------|-----------------|---------------------|----------------------|---------------|--------------|
| rs1126057                                          | T/G       |             | 5:146335724     |                     |                      |               |              |
|                                                    | —         |             | het_P:          |                     | 0.341                | het_I:        | 0.0          |
|                                                    | ngt       | info        | p_value         | f_ca(n)             | f_co(n)              | ln(OR)        | STDerr       |
| PGC_SCZ wave3 eur only                             | 24        | 0.99        | 2e-05           | 0.342(53386)        | 0.349(77258)         | -0.039        | 0.009        |
| PGC_SCZ wave3 asn only                             | 2         | 0.95        | 0.00202         | 0.71(14004)         | 0.723(16757)         | -0.06         | 0.019        |
| PGC_SCZ wave2 only                                 | 17        | 0.99        | 1.23e-05        | 0.358(34850)        | 0.353(44347)         | -0.05         | 0.012        |
| PGC_SCZ wave3 (excl. wave2)                        | 9         | 0.98        | 0.00346         | 0.484(32540)        | 0.471(49668)         | -0.034        | 0.012        |
| <b>PGC_SCZ wave3 (incl. wave2)</b>                 | <b>26</b> | <b>0.98</b> | <b>2.31e-07</b> | <b>0.419(67390)</b> | <b>0.415(94015)</b>  | <b>-0.043</b> | <b>0.008</b> |
| Decode – Replication                               | 0         | 1.00        | 0.012           | 0.381(1979)         | 0.382(142627)        | -0.034        | 0.039        |
| <b>PGC_SCZ wave3 (incl. wave2 and replication)</b> | <b>26</b> | <b>0.99</b> | <b>2.13e-08</b> | <b>0.418(69369)</b> | <b>0.395(236642)</b> | <b>-0.045</b> | <b>0.008</b> |

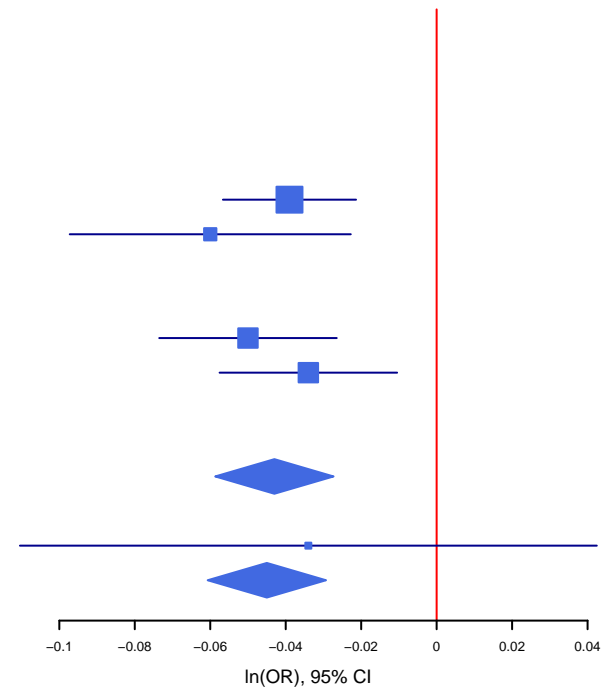

rs72943392

|     |                          |
|-----|--------------------------|
| G/C | 11:81178838              |
| ++  | het_P: 0.218 het_I: 34.0 |

|                                             | ngt | info | p_value  | f_ca(n)      | f_co(n)       | ln(OR) | STDerr |
|---------------------------------------------|-----|------|----------|--------------|---------------|--------|--------|
| PGC_SCZ wave3 eur only                      | 5   | 0.98 | 2.39e-08 | 0.707(53386) | 0.711(77258)  | -0.053 | 0.01   |
| PGC_SCZ wave3 asn only                      | 0   | 0.89 | 0.316    | 0.955(14004) | 0.959(16757)  | -0.047 | 0.047  |
| PGC_SCZ wave2 only                          | 0   | 0.98 | 2.49e-07 | 0.713(34850) | 0.713(44347)  | -0.063 | 0.012  |
| PGC_SCZ wave3 (excl. wave2)                 | 5   | 0.95 | 0.00794  | 0.808(32540) | 0.793(49668)  | -0.039 | 0.015  |
| PGC_SCZ wave3 (incl. wave2)                 | 5   | 0.96 | 1.44e-08 | 0.759(67390) | 0.755(94015)  | -0.053 | 0.009  |
| Decode - Replication                        | 0   | 1.00 | 0.731    | 0.701(1979)  | 0.671(142627) | -0.039 | 0.042  |
| PGC_SCZ wave3 (incl. wave2 and replication) | 5   | 0.98 | 2.19e-08 | 0.757(69369) | 0.704(236642) | -0.051 | 0.009  |

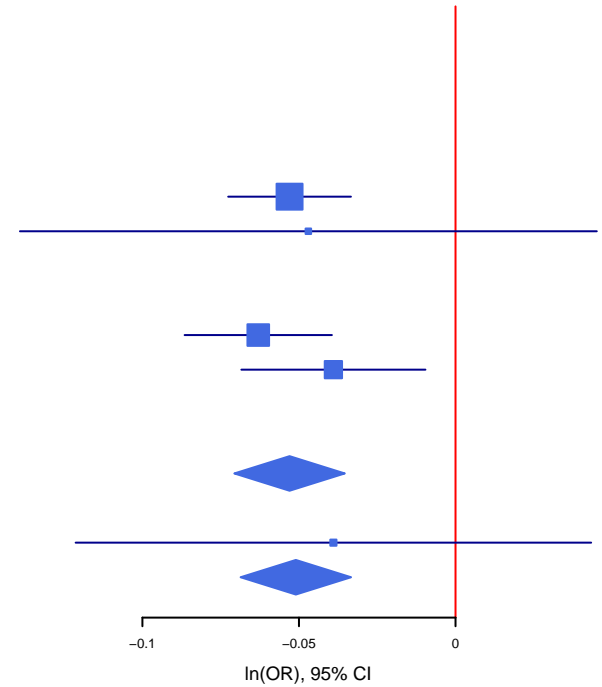

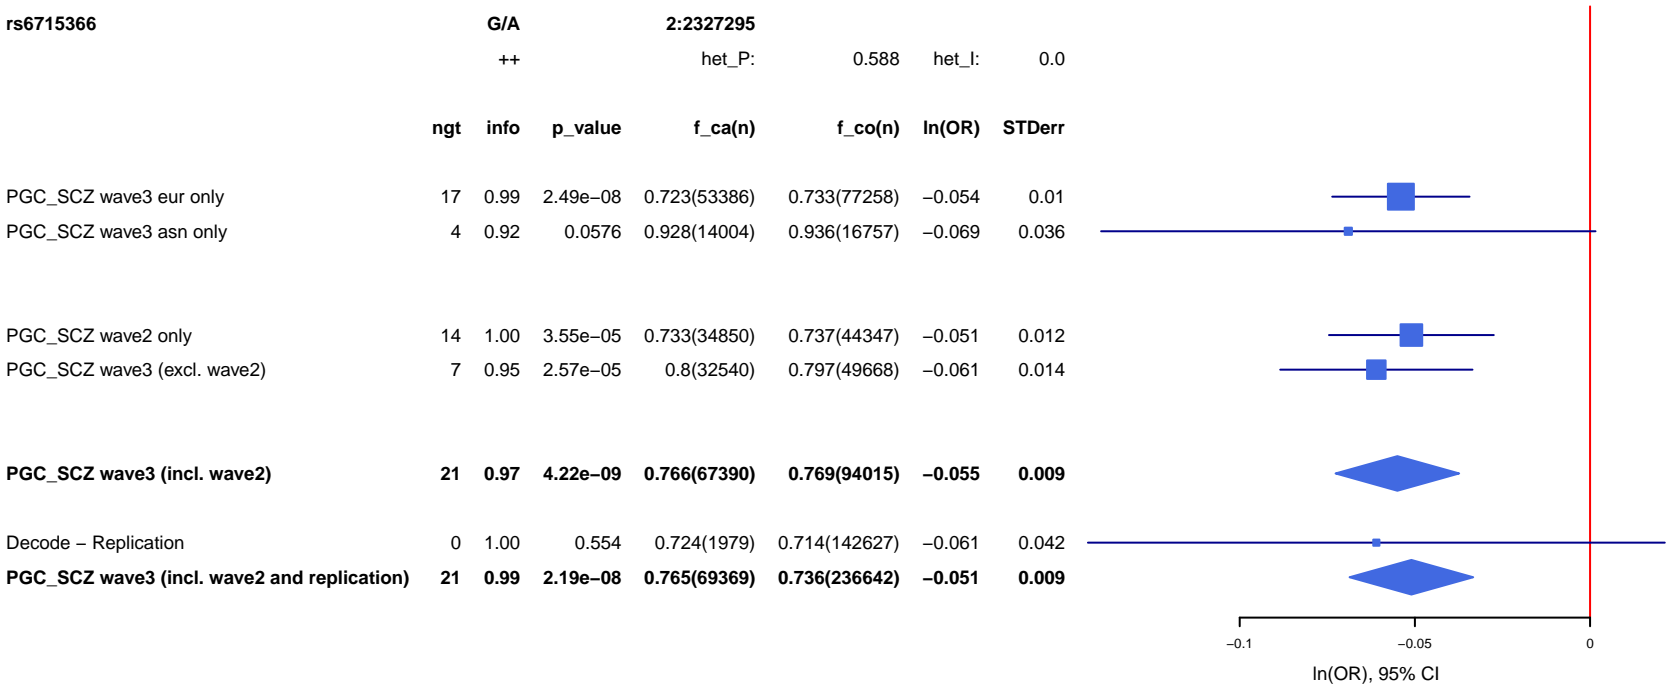

| rs6925079                                          | T/C      |             | 6:64946311      |                     |                      |               |              |
|----------------------------------------------------|----------|-------------|-----------------|---------------------|----------------------|---------------|--------------|
|                                                    | —        |             | het_P:          |                     | 0.53                 | het_I:        | 0.0          |
|                                                    | ngt      | info        | p_value         | f_ca(n)             | f_co(n)              | ln(OR)        | STDerr       |
| PGC_SCZ wave3 eur only                             | 0        | 0.99        | 3.98e−05        | 0.668(53386)        | 0.674(77258)         | −0.038        | 0.009        |
| PGC_SCZ wave3 asn only                             | 0        | 0.95        | 5.64e−05        | 0.486(14004)        | 0.5(16757)           | −0.07         | 0.018        |
| PGC_SCZ wave2 only                                 | 0        | 0.99        | 0.000587        | 0.658(34850)        | 0.671(44347)         | −0.04         | 0.012        |
| PGC_SCZ wave3 (excl. wave2)                        | 0        | 0.98        | 1.34e−05        | 0.6(32540)          | 0.618(49668)         | −0.05         | 0.012        |
| <b>PGC_SCZ wave3 (incl. wave2)</b>                 | <b>0</b> | <b>0.98</b> | <b>3.58e−08</b> | <b>0.63(67390)</b>  | <b>0.643(94015)</b>  | <b>−0.045</b> | <b>0.008</b> |
| Decode – Replication                               | 0        | 1.00        | 0.409           | 0.661(1979)         | 0.648(142627)        | −0.05         | 0.04         |
| <b>PGC_SCZ wave3 (incl. wave2 and replication)</b> | <b>0</b> | <b>0.99</b> | <b>2.35e−08</b> | <b>0.631(69369)</b> | <b>0.646(236642)</b> | <b>−0.044</b> | <b>0.008</b> |

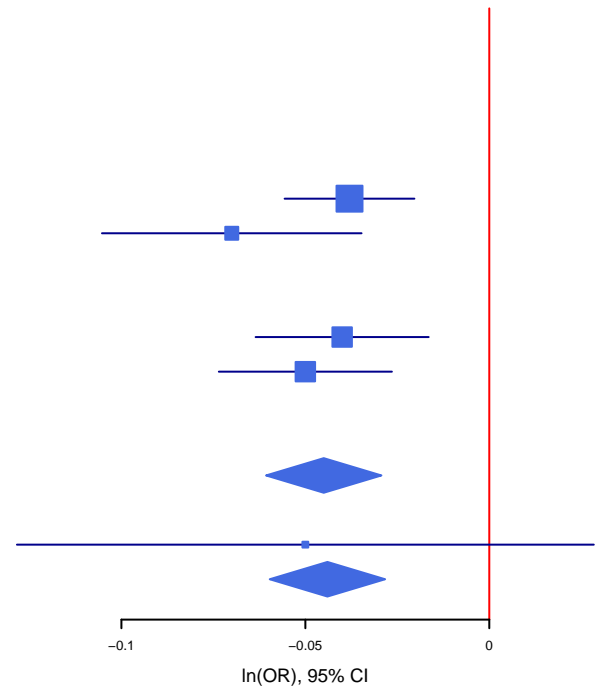

|                                                    |          |             |                 |                     |                      |               |              |
|----------------------------------------------------|----------|-------------|-----------------|---------------------|----------------------|---------------|--------------|
| rs3900555                                          | G/A      |             | 1:61063225      |                     |                      |               | n            |
|                                                    | ++       |             | het_P:          | 0.98                | het_I:               | 0.0           |              |
|                                                    | ngt      | info        | p_value         | f_ca(n)             | f_co(n)              | ln(OR)        | STDerr       |
| PGC_SCZ wave3 eur only                             | 0        | 1.00        | 3.74e-07        | 0.512(53386)        | 0.525(77258)         | -0.044        | 0.009        |
| PGC_SCZ wave3 asn only                             | 0        | 0.98        | 0.0492          | 0.285(14004)        | 0.287(16757)         | -0.037        | 0.019        |
| PGC_SCZ wave2 only                                 | 0        | 1.00        | 9.5e-05         | 0.501(34850)        | 0.522(44347)         | -0.043        | 0.011        |
| PGC_SCZ wave3 (excl. wave2)                        | 0        | 0.99        | 0.000151        | 0.426(32540)        | 0.447(49668)         | -0.043        | 0.011        |
| <b>PGC_SCZ wave3 (incl. wave2)</b>                 | <b>0</b> | <b>0.99</b> | <b>5.34e-08</b> | <b>0.465(67390)</b> | <b>0.482(94015)</b>  | <b>-0.043</b> | <b>0.008</b> |
| Decode – Replication                               | 0        | 1.00        | 0.281           | 0.52(1979)          | 0.508(142627)        | -0.043        | 0.038        |
| <b>PGC_SCZ wave3 (incl. wave2 and replication)</b> | <b>0</b> | <b>1.00</b> | <b>2.42e-08</b> | <b>0.467(69369)</b> | <b>0.498(236642)</b> | <b>-0.043</b> | <b>0.008</b> |

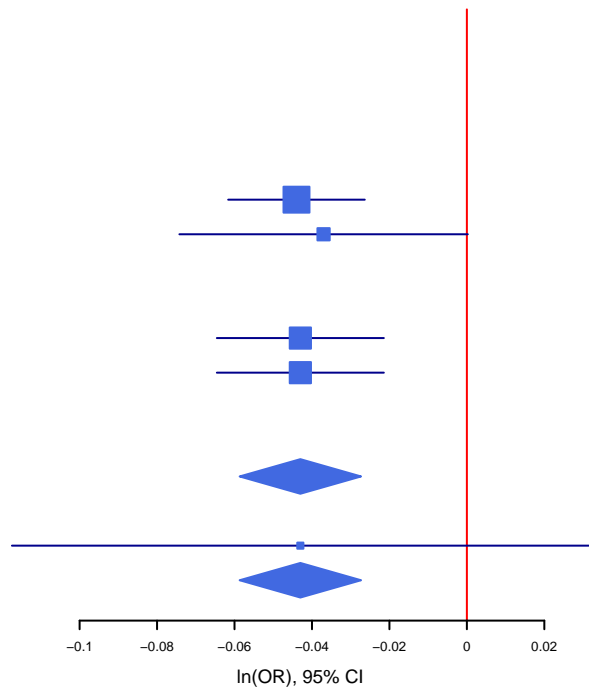



| <b>rs61786047</b>                                  | <b>G/A</b> |             | <b>1:29032580</b> |                     |                      |              |              |
|----------------------------------------------------|------------|-------------|-------------------|---------------------|----------------------|--------------|--------------|
|                                                    | --         |             | het_P:            | 0.364               | het_I:               | 0.0          |              |
|                                                    | ngt        | info        | p_value           | f_ca(n)             | f_co(n)              | ln(OR)       | STDerr       |
| PGC_SCZ wave3 eur only                             | 0          | 0.98        | 8.33e-09          | 0.886(53386)        | 0.878(77258)         | 0.078        | 0.014        |
| PGC_SCZ wave3 asn only                             | nan        | nan         | nan               | nan(nan)            | nan(nan)             | nan          | nan          |
| PGC_SCZ wave2 only                                 | 0          | 0.97        | 7.21e-05          | 0.886(32998)        | 0.88(43387)          | 0.069        | 0.017        |
| PGC_SCZ wave3 (excl. wave2)                        | 0          | 0.91        | 1.12e-05          | 0.901(24100)        | 0.891(39128)         | 0.094        | 0.021        |
| <b>PGC_SCZ wave3 (incl. wave2)</b>                 | <b>0</b>   | <b>0.94</b> | <b>4.91e-09</b>   | <b>0.892(57098)</b> | <b>0.885(82515)</b>  | <b>0.079</b> | <b>0.014</b> |
| Decode – Replication                               | 0          | 1.00        | 0.497             | 0.9(1979)           | 0.918(142627)        | 0.094        | 0.065        |
| <b>PGC_SCZ wave3 (incl. wave2 and replication)</b> | <b>0</b>   | <b>0.98</b> | <b>2.46e-08</b>   | <b>0.892(59077)</b> | <b>0.906(225142)</b> | <b>0.074</b> | <b>0.013</b> |

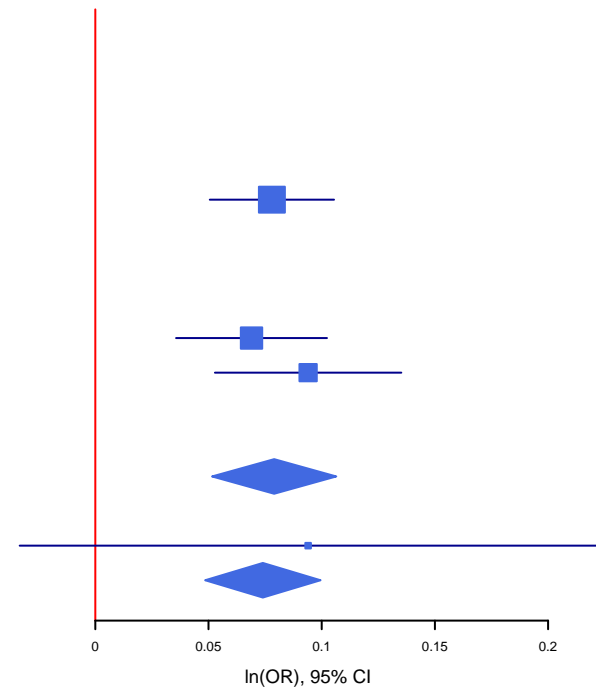

rs6478858

|     |                          |
|-----|--------------------------|
| A/G | 9:131800524              |
| ++  | het_P: 0.7    het_I: 0.0 |

|                                             | ngt | info | p_value  | f_ca(n)      | f_co(n)       | ln(OR) | STDerr |
|---------------------------------------------|-----|------|----------|--------------|---------------|--------|--------|
| PGC_SCZ wave3 eur only                      | 1   | 0.89 | 3.84e-07 | 0.068(53386) | 0.063(77258)  | 0.093  | 0.018  |
| PGC_SCZ wave3 asn only                      | 0   | 0.45 | 0.291    | 0.034(14004) | 0.034(16757)  | 0.073  | 0.069  |
| PGC_SCZ wave2 only                          | 1   | 0.87 | 0.000261 | 0.066(34850) | 0.063(44347)  | 0.086  | 0.024  |
| PGC_SCZ wave3 (excl. wave2)                 | 0   | 0.76 | 0.000223 | 0.055(32540) | 0.054(49668)  | 0.1    | 0.027  |
| PGC_SCZ wave3 (incl. wave2)                 | 1   | 0.81 | 2.25e-07 | 0.061(67390) | 0.058(94015)  | 0.092  | 0.018  |
| Decode – Replication                        | 0   | 1.00 | 0.0162   | 0.057(1979)  | 0.068(142627) | 0.1    | 0.078  |
| PGC_SCZ wave3 (incl. wave2 and replication) | 1   | 0.93 | 2.47e-08 | 0.061(69369) | 0.064(236642) | 0.097  | 0.017  |

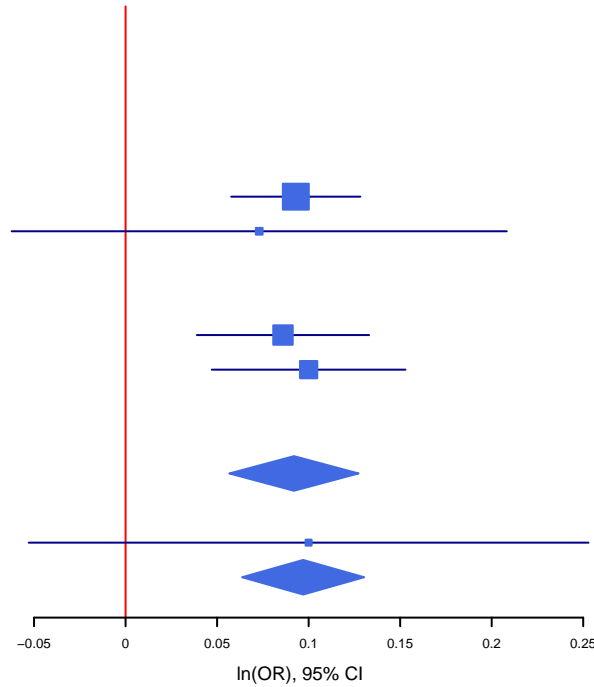

rs11972718

|     |                           |
|-----|---------------------------|
| C/G | 7:8549187                 |
| --- | het_P: 0.78    het_I: 0.0 |

|  | ngt | info | p_value | f_ca(n) | f_co(n) | ln(OR) | STDerr |
|--|-----|------|---------|---------|---------|--------|--------|
|--|-----|------|---------|---------|---------|--------|--------|

|                        |    |      |          |              |              |        |       |
|------------------------|----|------|----------|--------------|--------------|--------|-------|
| PGC_SCZ wave3 eur only | 11 | 0.99 | 2.59e-07 | 0.692(53386) | 0.701(77258) | -0.048 | 0.009 |
| PGC_SCZ wave3 asn only | 1  | 0.96 | 0.0185   | 0.849(14004) | 0.856(16757) | -0.057 | 0.024 |

|                             |    |      |          |              |              |        |       |
|-----------------------------|----|------|----------|--------------|--------------|--------|-------|
| PGC_SCZ wave2 only          | 0  | 0.99 | 1.26e-05 | 0.696(34850) | 0.701(44347) | -0.052 | 0.012 |
| PGC_SCZ wave3 (excl. wave2) | 12 | 0.98 | 0.000316 | 0.754(32540) | 0.753(49668) | -0.047 | 0.013 |

|                                    |           |             |                 |                     |                     |               |              |
|------------------------------------|-----------|-------------|-----------------|---------------------|---------------------|---------------|--------------|
| <b>PGC_SCZ wave3 (incl. wave2)</b> | <b>12</b> | <b>0.98</b> | <b>1.57e-08</b> | <b>0.724(67390)</b> | <b>0.728(94015)</b> | <b>-0.049</b> | <b>0.009</b> |
|------------------------------------|-----------|-------------|-----------------|---------------------|---------------------|---------------|--------------|

|                      |   |      |       |            |               |        |       |
|----------------------|---|------|-------|------------|---------------|--------|-------|
| Decode - Replication | 0 | 0.87 | 0.817 | 0.76(1979) | 0.853(142627) | -0.047 | 0.048 |
|----------------------|---|------|-------|------------|---------------|--------|-------|

|                                                    |           |             |                 |                     |                      |               |              |
|----------------------------------------------------|-----------|-------------|-----------------|---------------------|----------------------|---------------|--------------|
| <b>PGC_SCZ wave3 (incl. wave2 and replication)</b> | <b>12</b> | <b>0.92</b> | <b>2.49e-08</b> | <b>0.725(69369)</b> | <b>0.803(236642)</b> | <b>-0.048</b> | <b>0.009</b> |
|----------------------------------------------------|-----------|-------------|-----------------|---------------------|----------------------|---------------|--------------|

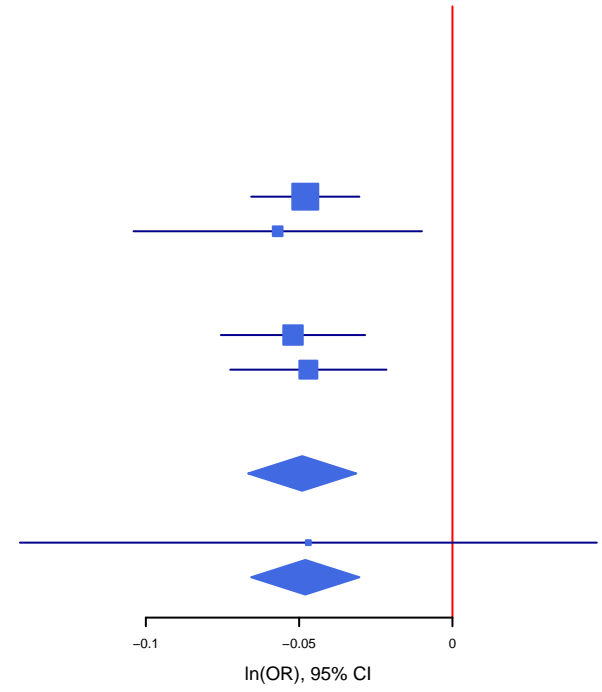

| rs2241033                                          | C/T      |             | 16:90109372     |                     |                      |               |              |
|----------------------------------------------------|----------|-------------|-----------------|---------------------|----------------------|---------------|--------------|
|                                                    | ++       |             | het_P:          | 0.991               | het_I:               | 0.0           |              |
|                                                    | ngt      | info        | p_value         | f_ca(n)             | f_co(n)              | ln(OR)        | STDerr       |
| PGC_SCZ wave3 eur only                             | 1        | 0.93        | 3.02e-08        | 0.351(53386)        | 0.364(77258)         | -0.052        | 0.009        |
| PGC_SCZ wave3 asn only                             | 0        | 0.88        | 0.502           | 0.762(14004)        | 0.768(16757)         | -0.015        | 0.022        |
| PGC_SCZ wave2 only                                 | 1        | 0.93        | 9.64e-05        | 0.377(34850)        | 0.377(44347)         | -0.046        | 0.012        |
| PGC_SCZ wave3 (excl. wave2)                        | 0        | 0.91        | 0.000247        | 0.501(32540)        | 0.489(49668)         | -0.046        | 0.012        |
| <b>PGC_SCZ wave3 (incl. wave2)</b>                 | <b>1</b> | <b>0.92</b> | <b>8.72e-08</b> | <b>0.437(67390)</b> | <b>0.436(94015)</b>  | <b>-0.046</b> | <b>0.009</b> |
| Decode – Replication                               | 0        | 1.00        | 0.0909          | 0.348(1979)         | 0.38(142627)         | -0.046        | 0.04         |
| <b>PGC_SCZ wave3 (incl. wave2 and replication)</b> | <b>1</b> | <b>0.97</b> | <b>2.5e-08</b>  | <b>0.434(69369)</b> | <b>0.402(236642)</b> | <b>-0.047</b> | <b>0.008</b> |

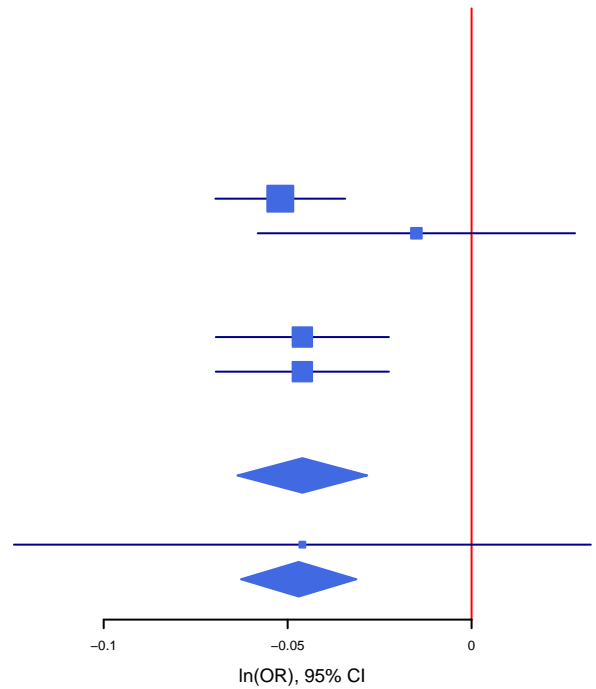

rs41314284

C/T  
++  
1:226790001  
het\_P: 0.112 het\_I: 60.4

|                                             | ngt | info | p_value  | f_ca(n)      | f_co(n)       | ln(OR) | STDerr |
|---------------------------------------------|-----|------|----------|--------------|---------------|--------|--------|
| PGC_SCZ wave3 eur only                      | 5   | 0.98 | 5.27e-08 | 0.902(53386) | 0.911(77258)  | -0.081 | 0.015  |
| PGC_SCZ wave3 asn only                      | 0   | 0.89 | 0.909    | 0.983(14004) | 0.984(16757)  | 0.008  | 0.07   |
| PGC_SCZ wave2 only                          | 0   | 0.98 | 4.27e-07 | 0.908(34850) | 0.914(44347)  | -0.097 | 0.019  |
| PGC_SCZ wave3 (excl. wave2)                 | 5   | 0.95 | 0.0247   | 0.929(32540) | 0.933(49668)  | -0.05  | 0.022  |
| PGC_SCZ wave3 (incl. wave2)                 | 5   | 0.96 | 1.16e-07 | 0.918(67390) | 0.924(94015)  | -0.077 | 0.015  |
| Decode - Replication                        | 0   | 1.00 | 0.0697   | 0.915(1979)  | 0.923(142627) | -0.05  | 0.068  |
| PGC_SCZ wave3 (incl. wave2 and replication) | 5   | 0.98 | 2.54e-08 | 0.918(69369) | 0.924(236642) | -0.079 | 0.014  |

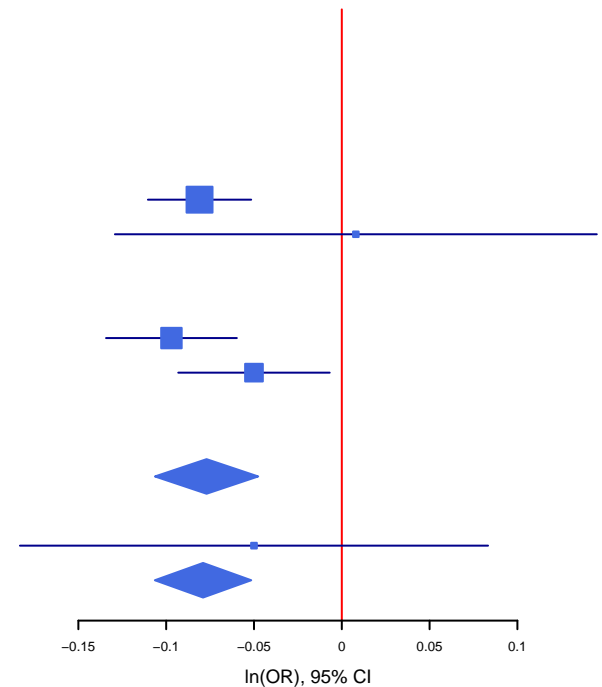

|                                                    |           |             |                 |                     |                     |              |             |
|----------------------------------------------------|-----------|-------------|-----------------|---------------------|---------------------|--------------|-------------|
| rs9454727                                          | A/G       |             | 6:70003389      |                     |                     |              |             |
|                                                    | ++        |             | het_P:          |                     | 0.492               | het_I:       | 0.0         |
|                                                    | ngt       | info        | p_value         | f_ca(n)             | f_co(n)             | ln(OR)       | STDerr      |
| PGC_SCZ wave3 eur only                             | 33        | 0.97        | 3.35e-08        | 0.738(53386)        | 0.727(77258)        | 0.054        | 0.01        |
| PGC_SCZ wave3 asn only                             | 3         | 0.69        | 0.271           | 0.975(11885)        | 0.976(14212)        | 0.083        | 0.075       |
| PGC_SCZ wave2 only                                 | 30        | 0.99        | 7.35e-05        | 0.749(34850)        | 0.732(44347)        | 0.05         | 0.012       |
| PGC_SCZ wave3 (excl. wave2)                        | 6         | 0.87        | 5.34e-05        | 0.817(30421)        | 0.798(47123)        | 0.063        | 0.016       |
| <b>PGC_SCZ wave3 (incl. wave2)</b>                 | <b>36</b> | <b>0.93</b> | <b>1.93e-08</b> | <b>0.781(65271)</b> | <b>0.766(91470)</b> | <b>0.055</b> | <b>0.01</b> |
| Decode – Replication                               | 0         | 1.00        | 0.611           | 0.734(1979)         | 0.756(142627)       | 0.063        | 0.044       |
| <b>PGC_SCZ wave3 (incl. wave2 and replication)</b> | <b>36</b> | <b>0.97</b> | <b>2.59e-08</b> | <b>0.78(67250)</b>  | <b>0.76(234097)</b> | <b>0.053</b> | <b>0.01</b> |

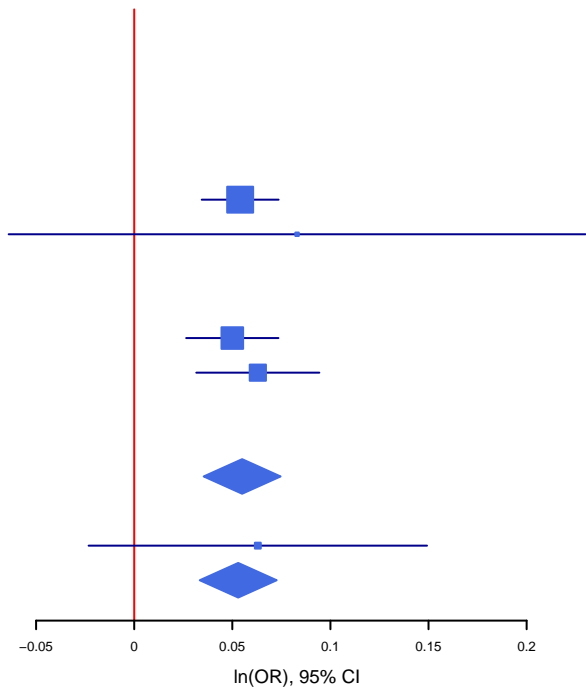

rs10777187

T/C  
++  
12:89940502  
het\_P: 0.503 het\_I: 0.0

|                                             | ngt | info | p_value  | f_ca(n)      | f_co(n)       | ln(OR) | STDerr |
|---------------------------------------------|-----|------|----------|--------------|---------------|--------|--------|
| PGC_SCZ wave3 eur only                      | 0   | 0.96 | 5.27e-07 | 0.254(53386) | 0.248(77258)  | 0.051  | 0.01   |
| PGC_SCZ wave3 asn only                      | 0   | 0.91 | 0.0173   | 0.224(14004) | 0.22(16757)   | 0.052  | 0.022  |
| PGC_SCZ wave2 only                          | 0   | 0.96 | 8.57e-06 | 0.251(34850) | 0.244(44347)  | 0.057  | 0.013  |
| PGC_SCZ wave3 (excl. wave2)                 | 0   | 0.94 | 0.000705 | 0.244(32540) | 0.243(49668)  | 0.045  | 0.013  |
| PGC_SCZ wave3 (incl. wave2)                 | 0   | 0.95 | 2.82e-08 | 0.248(67390) | 0.243(94015)  | 0.051  | 0.009  |
| Decode – Replication                        | 0   | 1.00 | 0.463    | 0.246(1979)  | 0.26(142627)  | 0.045  | 0.044  |
| PGC_SCZ wave3 (incl. wave2 and replication) | 0   | 0.98 | 2.59e-08 | 0.248(69369) | 0.253(236642) | 0.05   | 0.009  |

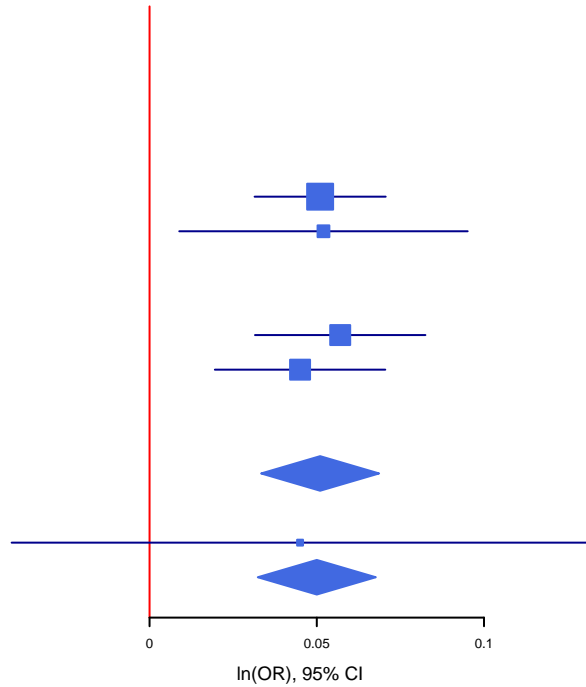

rs80094991

C/T  
++  
22:42248289  
het\_P: 0.212 het\_I: 36.0

|                        | ngt | info | p_value  | f_ca(n)      | f_co(n)      | ln(OR) | STDerr |
|------------------------|-----|------|----------|--------------|--------------|--------|--------|
| PGC_SCZ wave3 eur only | 31  | 0.94 | 2.62e-08 | 0.964(53386) | 0.968(77258) | -0.136 | 0.024  |
| PGC_SCZ wave3 asn only | nan | nan  | nan      | nan(nan)     | nan(nan)     | nan    | nan    |

|                             |    |      |         |              |              |        |       |
|-----------------------------|----|------|---------|--------------|--------------|--------|-------|
| PGC_SCZ wave2 only          | 1  | 0.93 | 2.6e-07 | 0.963(32998) | 0.967(43387) | -0.16  | 0.031 |
| PGC_SCZ wave3 (excl. wave2) | 30 | 0.95 | 0.0142  | 0.966(20388) | 0.969(33871) | -0.097 | 0.04  |

PGC\_SCZ wave3 (incl. wave2) 31 0.94 2.62e-08 0.964(53386) 0.968(77258) -0.136 0.024

Decode – Replication 0 1.00 0.549 0.966(1979) 0.974(142627) -0.097 0.105

PGC\_SCZ wave3 (incl. wave2 and replication) 31 0.98 2.73e-08 0.964(55365) 0.972(219885) -0.133 0.024

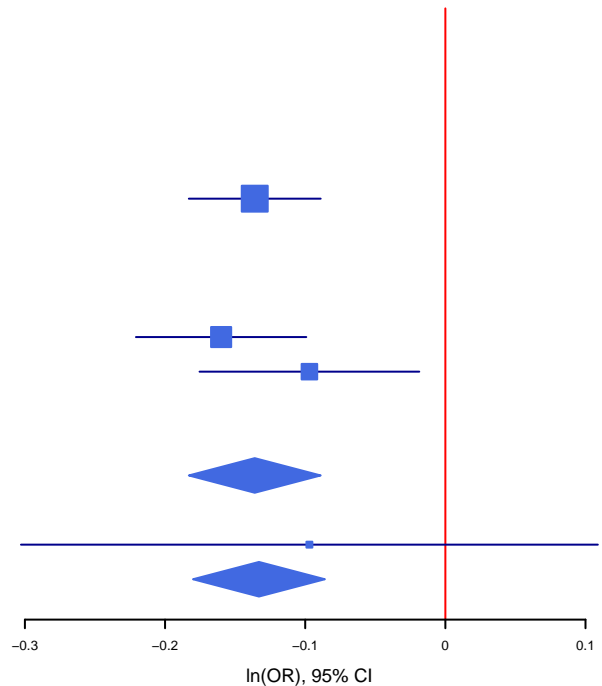



rs72970145

C/T

18:77748972

—

het\_P:

0.284

het\_I:

13.1

|  | ngt | info | p_value | f_ca(n) | f_co(n) | ln(OR) | STDerr |
|--|-----|------|---------|---------|---------|--------|--------|
|--|-----|------|---------|---------|---------|--------|--------|

|                        |   |      |       |              |              |       |       |
|------------------------|---|------|-------|--------------|--------------|-------|-------|
| PGC_SCZ wave3 eur only | 0 | 0.98 | 2e-05 | 0.849(53386) | 0.842(77258) | 0.051 | 0.012 |
|------------------------|---|------|-------|--------------|--------------|-------|-------|

|                        |   |      |          |              |              |      |       |
|------------------------|---|------|----------|--------------|--------------|------|-------|
| PGC_SCZ wave3 asn only | 0 | 0.97 | 0.000256 | 0.733(14004) | 0.719(16757) | 0.07 | 0.019 |
|------------------------|---|------|----------|--------------|--------------|------|-------|

|                    |   |      |        |              |              |       |       |
|--------------------|---|------|--------|--------------|--------------|-------|-------|
| PGC_SCZ wave2 only | 0 | 0.99 | 0.0024 | 0.842(34850) | 0.839(44347) | 0.045 | 0.015 |
|--------------------|---|------|--------|--------------|--------------|-------|-------|

|                             |   |      |          |              |              |       |       |
|-----------------------------|---|------|----------|--------------|--------------|-------|-------|
| PGC_SCZ wave3 (excl. wave2) | 0 | 0.96 | 1.81e-06 | 0.807(32540) | 0.803(49668) | 0.067 | 0.014 |
|-----------------------------|---|------|----------|--------------|--------------|-------|-------|

|                                    |          |             |                 |                     |                    |              |             |
|------------------------------------|----------|-------------|-----------------|---------------------|--------------------|--------------|-------------|
| <b>PGC_SCZ wave3 (incl. wave2)</b> | <b>0</b> | <b>0.98</b> | <b>2.79e-08</b> | <b>0.825(67390)</b> | <b>0.82(94015)</b> | <b>0.057</b> | <b>0.01</b> |
|------------------------------------|----------|-------------|-----------------|---------------------|--------------------|--------------|-------------|

|                      |   |      |       |             |               |       |       |
|----------------------|---|------|-------|-------------|---------------|-------|-------|
| Decode – Replication | 0 | 1.00 | 0.589 | 0.827(1979) | 0.836(142627) | 0.067 | 0.051 |
|----------------------|---|------|-------|-------------|---------------|-------|-------|

|                                                    |          |             |                 |                     |                     |              |             |
|----------------------------------------------------|----------|-------------|-----------------|---------------------|---------------------|--------------|-------------|
| <b>PGC_SCZ wave3 (incl. wave2 and replication)</b> | <b>0</b> | <b>0.99</b> | <b>2.75e-08</b> | <b>0.825(69369)</b> | <b>0.83(236642)</b> | <b>0.056</b> | <b>0.01</b> |
|----------------------------------------------------|----------|-------------|-----------------|---------------------|---------------------|--------------|-------------|

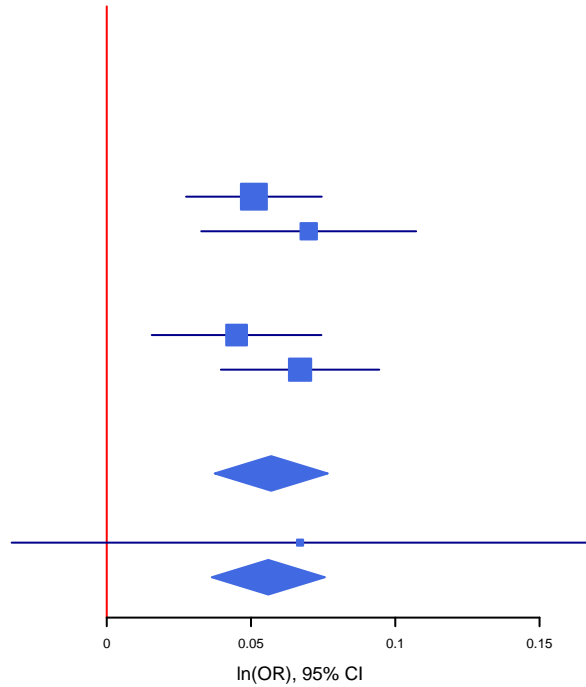

| <b>rs7133857</b>                                   |          | <b>G/A</b>  |                 | <b>12:103600131</b> |                      |              |              |
|----------------------------------------------------|----------|-------------|-----------------|---------------------|----------------------|--------------|--------------|
|                                                    |          | --          |                 | het_P:              | 0.054                | het_I:       | 73.0         |
|                                                    | ngt      | info        | p_value         | f_ca(n)             | f_co(n)              | ln(OR)       | STDerr       |
| PGC_SCZ wave3 eur only                             | 0        | 0.99        | 6.63e-09        | 0.636(53386)        | 0.626(77258)         | 0.052        | 0.009        |
| PGC_SCZ wave3 asn only                             | 0        | 0.94        | 0.51            | 0.871(14004)        | 0.871(16757)         | 0.017        | 0.026        |
| PGC_SCZ wave2 only                                 | 0        | 1.01        | 3.12e-08        | 0.653(34850)        | 0.633(44347)         | 0.063        | 0.011        |
| PGC_SCZ wave3 (excl. wave2)                        | 0        | 0.97        | 0.0181          | 0.719(32540)        | 0.703(49668)         | 0.03         | 0.013        |
| <b>PGC_SCZ wave3 (incl. wave2)</b>                 | <b>0</b> | <b>0.98</b> | <b>1.18e-08</b> | <b>0.685(67390)</b> | <b>0.67(94015)</b>   | <b>0.048</b> | <b>0.008</b> |
| Decode – Replication                               | 0        | 1.00        | 0.942           | 0.62(1979)          | 0.613(142627)        | 0.03         | 0.039        |
| <b>PGC_SCZ wave3 (incl. wave2 and replication)</b> | <b>0</b> | <b>0.99</b> | <b>2.77e-08</b> | <b>0.683(69369)</b> | <b>0.635(236642)</b> | <b>0.046</b> | <b>0.008</b> |

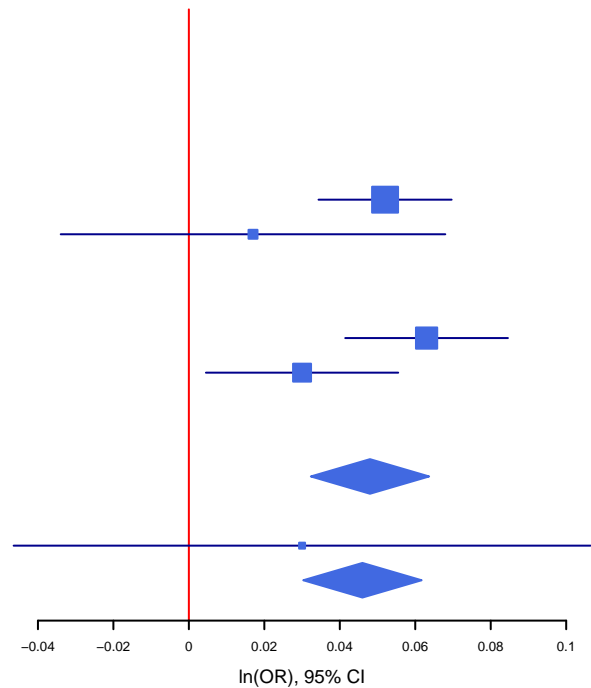

rs16940992

A/G  
++  
12:111207515  
het\_P: 0.95  
het\_I: 0.0

|                                                    | ngt       | info        | p_value         | f_ca(n)             | f_co(n)              | ln(OR)       | STDerr       |
|----------------------------------------------------|-----------|-------------|-----------------|---------------------|----------------------|--------------|--------------|
| PGC_SCZ wave3 eur only                             | 20        | 0.98        | 2.04e-08        | 0.86(53386)         | 0.854(77258)         | 0.07         | 0.012        |
| PGC_SCZ wave3 asn only                             | 3         | 0.90        | 0.325           | 0.943(14004)        | 0.942(16757)         | 0.038        | 0.038        |
| PGC_SCZ wave2 only                                 | 20        | 0.99        | 2.28e-05        | 0.867(34850)        | 0.859(44347)         | 0.067        | 0.016        |
| PGC_SCZ wave3 (excl. wave2)                        | 3         | 0.95        | 0.000197        | 0.889(32540)        | 0.879(49668)         | 0.066        | 0.018        |
| <b>PGC_SCZ wave3 (incl. wave2)</b>                 | <b>23</b> | <b>0.97</b> | <b>1.71e-08</b> | <b>0.877(67390)</b> | <b>0.87(94015)</b>   | <b>0.067</b> | <b>0.012</b> |
| Decode – Replication                               | 0         | 1.00        | 0.824           | 0.844(1979)         | 0.852(142627)        | 0.066        | 0.052        |
| <b>PGC_SCZ wave3 (incl. wave2 and replication)</b> | <b>23</b> | <b>0.99</b> | <b>2.77e-08</b> | <b>0.876(69369)</b> | <b>0.859(236642)</b> | <b>0.064</b> | <b>0.012</b> |

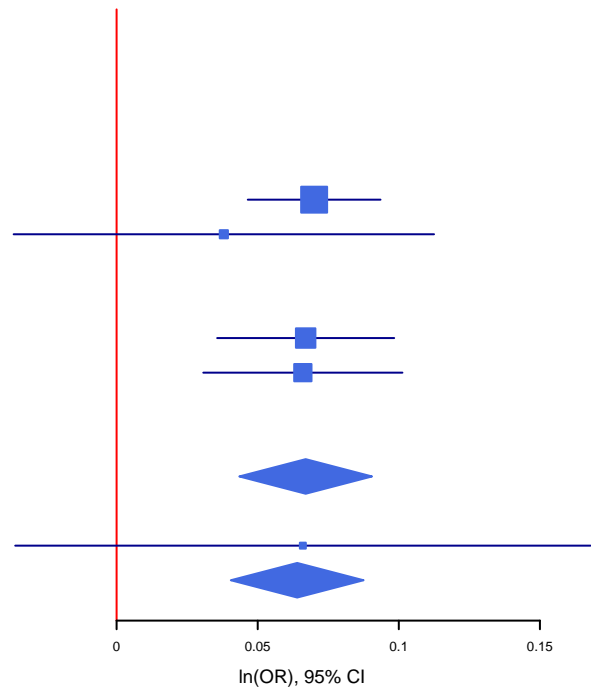

rs12126806

|     |                         |
|-----|-------------------------|
| C/T | 1:200963825             |
| --- | het_P: 0.723 het_I: 0.0 |

|                                             | ngt | info | p_value  | f_ca(n)      | f_co(n)       | ln(OR) | STDerr |
|---------------------------------------------|-----|------|----------|--------------|---------------|--------|--------|
| PGC_SCZ wave3 eur only                      | 14  | 1.00 | 4.42e-07 | 0.725(53386) | 0.712(77258)  | 0.048  | 0.01   |
| PGC_SCZ wave3 asn only                      | 2   | 0.99 | 0.0193   | 0.879(14004) | 0.873(16757)  | 0.061  | 0.026  |
| PGC_SCZ wave2 only                          | 8   | 1.00 | 1.43e-05 | 0.733(34850) | 0.718(44347)  | 0.053  | 0.012  |
| PGC_SCZ wave3 (excl. wave2)                 | 8   | 0.99 | 0.000511 | 0.782(32540) | 0.76(49668)   | 0.046  | 0.013  |
| PGC_SCZ wave3 (incl. wave2)                 | 16  | 1.00 | 2.89e-08 | 0.757(67390) | 0.74(94015)   | 0.05   | 0.009  |
| Decode - Replication                        | 0   | 1.00 | 0.535    | 0.713(1979)  | 0.655(142627) | 0.046  | 0.042  |
| PGC_SCZ wave3 (incl. wave2 and replication) | 16  | 1.00 | 2.84e-08 | 0.756(69369) | 0.689(236642) | 0.049  | 0.009  |

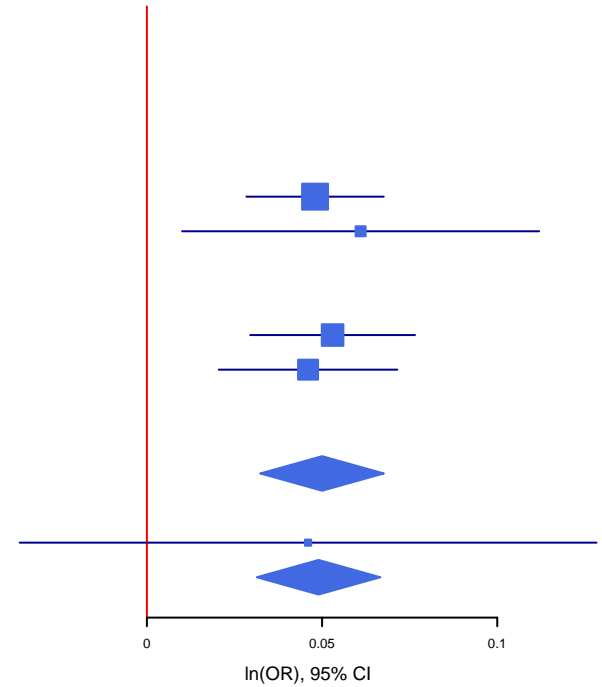

|                                                    |            |             |                 |                     |                      |               |               |
|----------------------------------------------------|------------|-------------|-----------------|---------------------|----------------------|---------------|---------------|
| <b>rs6925964</b>                                   |            | <b>A/T</b>  |                 | <b>6:96475894</b>   |                      |               |               |
|                                                    |            | ++          |                 | het_P:              | 0.096                | het_I:        | 63.9          |
|                                                    | <b>ngt</b> | <b>info</b> | <b>p_value</b>  | <b>f_ca(n)</b>      | <b>f_co(n)</b>       | <b>ln(OR)</b> | <b>STDerr</b> |
| PGC_SCZ wave3 eur only                             | 0          | 0.99        | 3.11e-08        | 0.938(53386)        | 0.933(77258)         | 0.098         | 0.018         |
| PGC_SCZ wave3 asn only                             | nan        | nan         | nan             | nan(nan)            | nan(nan)             | nan           | nan           |
| PGC_SCZ wave2 only                                 | 0          | 0.99        | 9.01e-08        | 0.939(32998)        | 0.932(43387)         | 0.121         | 0.023         |
| PGC_SCZ wave3 (excl. wave2)                        | 0          | 0.99        | 0.0287          | 0.939(20935)        | 0.936(34411)         | 0.061         | 0.028         |
| <b>PGC_SCZ wave3 (incl. wave2)</b>                 | <b>0</b>   | <b>0.99</b> | <b>3.18e-08</b> | <b>0.939(53933)</b> | <b>0.934(77798)</b>  | <b>0.097</b>  | <b>0.018</b>  |
| Decode – Replication                               | 0          | 1.00        | 0.521           | 0.936(1979)         | 0.953(142627)        | 0.061         | 0.082         |
| <b>PGC_SCZ wave3 (incl. wave2 and replication)</b> | <b>0</b>   | <b>0.99</b> | <b>2.84e-08</b> | <b>0.939(55912)</b> | <b>0.946(220425)</b> | <b>0.096</b>  | <b>0.017</b>  |

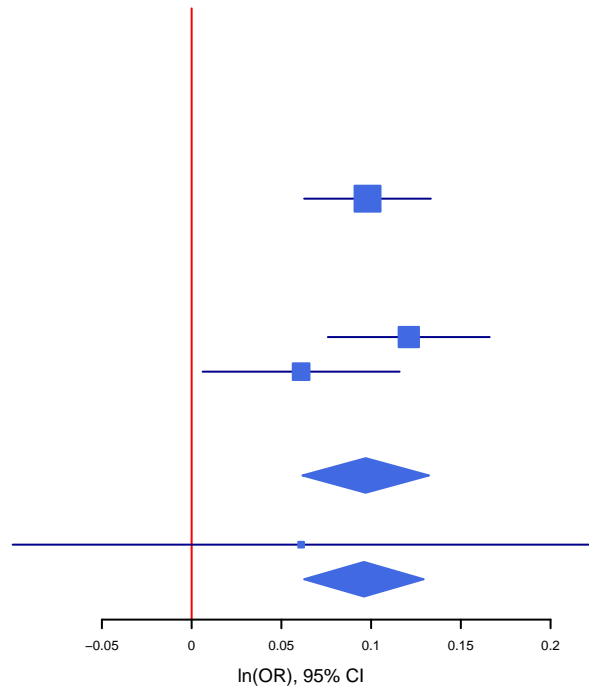

| rs7599488                                          | C/T      |             | 2:60718347      |                     |                      |              |              |
|----------------------------------------------------|----------|-------------|-----------------|---------------------|----------------------|--------------|--------------|
|                                                    | ---      |             | het_P:          | 0.006               | het_I:               | 86.5         |              |
|                                                    | ngt      | info        | p_value         | f_ca(n)             | f_co(n)              | ln(OR)       | STDerr       |
| PGC_SCZ wave3 eur only                             | 8        | 0.99        | 1.12e-06        | 0.578(53386)        | 0.568(77258)         | 0.043        | 0.009        |
| PGC_SCZ wave3 asn only                             | 1        | 0.95        | 0.143           | 0.258(14004)        | 0.247(16757)         | 0.03         | 0.02         |
| PGC_SCZ wave2 only                                 | 1        | 0.99        | 3.02e-08        | 0.56(34850)         | 0.558(44347)         | 0.061        | 0.011        |
| PGC_SCZ wave3 (excl. wave2)                        | 8        | 0.97        | 0.136           | 0.459(32540)        | 0.468(49668)         | 0.017        | 0.012        |
| <b>PGC_SCZ wave3 (incl. wave2)</b>                 | <b>9</b> | <b>0.98</b> | <b>4.39e-07</b> | <b>0.511(67390)</b> | <b>0.511(94015)</b>  | <b>0.04</b>  | <b>0.008</b> |
| Decode - Replication                               | 0        | 1.00        | 0.00398         | 0.549(1979)         | 0.501(142627)        | 0.017        | 0.038        |
| <b>PGC_SCZ wave3 (incl. wave2 and replication)</b> | <b>9</b> | <b>0.99</b> | <b>2.89e-08</b> | <b>0.512(69369)</b> | <b>0.505(236642)</b> | <b>0.043</b> | <b>0.008</b> |

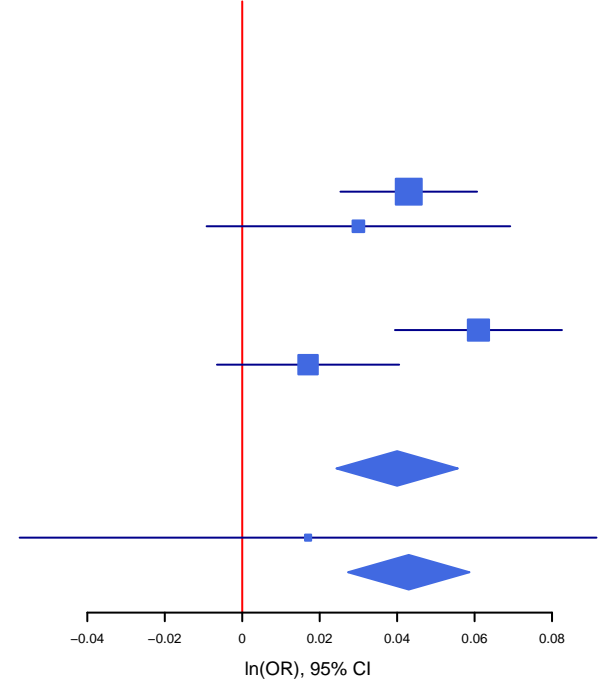

| rs7575796                                          | A/G       |             | 2:97746526      |                     |                      |              |              |
|----------------------------------------------------|-----------|-------------|-----------------|---------------------|----------------------|--------------|--------------|
|                                                    | ++        |             | het_P:          | 0.998               | het_I:               | 0.0          |              |
|                                                    | ngt       | info        | p_value         | f_ca(n)             | f_co(n)              | ln(OR)       | STDerr       |
| PGC_SCZ wave3 eur only                             | 23        | 0.80        | 2.06e-08        | 0.917(53386)        | 0.906(77258)         | 0.096        | 0.017        |
| PGC_SCZ wave3 asn only                             | nan       | nan         | nan             | nan(nan)            | nan(nan)             | nan          | nan          |
| PGC_SCZ wave2 only                                 | 0         | 0.75        | 1.05e-05        | 0.916(34850)        | 0.903(44347)         | 0.097        | 0.022        |
| PGC_SCZ wave3 (excl. wave2)                        | 23        | 0.71        | 0.000395        | 0.938(25548)        | 0.927(42604)         | 0.097        | 0.027        |
| <b>PGC_SCZ wave3 (incl. wave2)</b>                 | <b>23</b> | <b>0.73</b> | <b>1.57e-08</b> | <b>0.925(60398)</b> | <b>0.915(86951)</b>  | <b>0.097</b> | <b>0.017</b> |
| Decode – Replication                               | 0         | 1.00        | 0.841           | 0.917(1979)         | 0.903(142627)        | 0.097        | 0.068        |
| <b>PGC_SCZ wave3 (incl. wave2 and replication)</b> | <b>23</b> | <b>0.90</b> | <b>2.92e-08</b> | <b>0.925(62377)</b> | <b>0.907(229578)</b> | <b>0.092</b> | <b>0.017</b> |

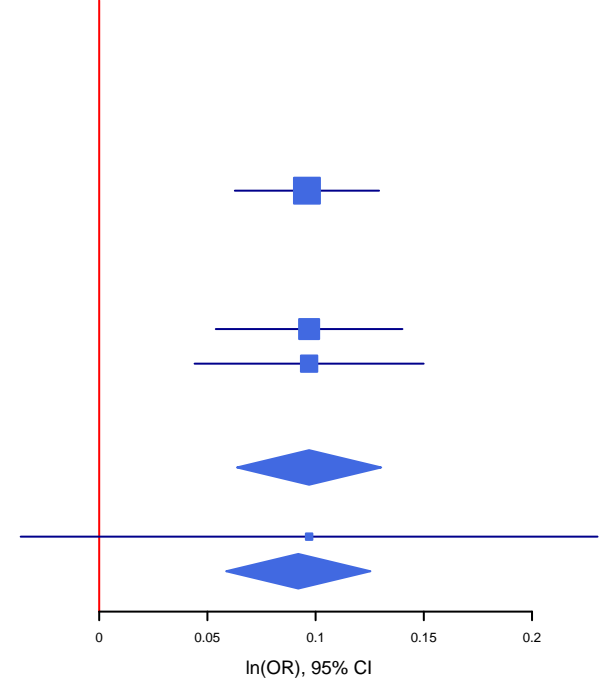

rs79478621

|     |                         |
|-----|-------------------------|
| T/G | 16:7750859              |
| ++  | het_P: 0.465 het_I: 0.0 |

|                        | ngt | info | p_value  | f_ca(n)     | f_co(n)      | ln(OR) | STDerr |
|------------------------|-----|------|----------|-------------|--------------|--------|--------|
| PGC_SCZ wave3 eur only | 23  | 0.96 | 7.72e-08 | 0.96(52493) | 0.953(75664) | 0.117  | 0.022  |
| PGC_SCZ wave3 asn only | nan | nan  | nan      | nan(nan)    | nan(nan)     | nan    | nan    |

|                             |    |      |          |              |              |       |       |
|-----------------------------|----|------|----------|--------------|--------------|-------|-------|
| PGC_SCZ wave2 only          | 0  | 0.96 | 4.97e-06 | 0.958(32105) | 0.953(41793) | 0.127 | 0.028 |
| PGC_SCZ wave3 (excl. wave2) | 23 | 0.91 | 0.00661  | 0.964(22450) | 0.956(37146) | 0.094 | 0.035 |

|                                             |    |      |          |              |               |       |       |
|---------------------------------------------|----|------|----------|--------------|---------------|-------|-------|
| PGC_SCZ wave3 (incl. wave2)                 | 23 | 0.94 | 1.42e-07 | 0.961(54555) | 0.954(78939)  | 0.114 | 0.022 |
| Decode – Replication                        | 0  | 1.00 | 0.0537   | 0.963(1979)  | 0.948(142627) | 0.094 | 0.101 |
| PGC_SCZ wave3 (incl. wave2 and replication) | 23 | 0.98 | 2.94e-08 | 0.961(56534) | 0.95(221566)  | 0.118 | 0.021 |

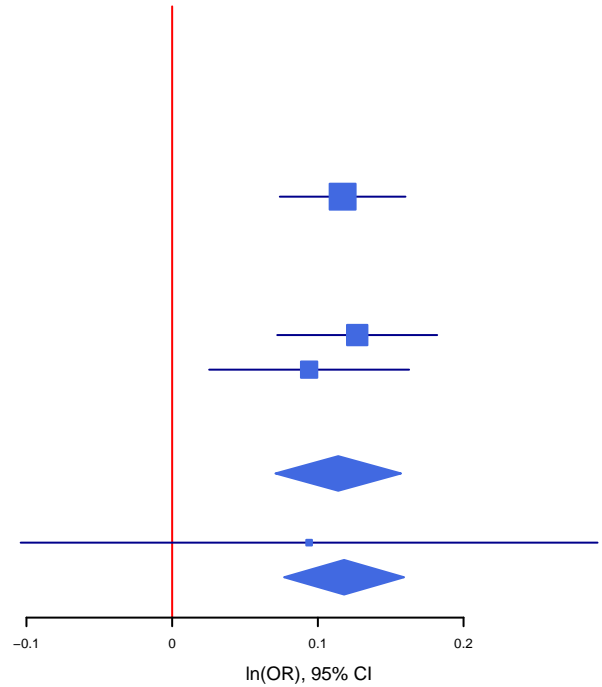



rs167924

A/G

3:107379837

—

het\_P:

0.809

het\_I:

0.0

|  | ngt | info | p_value | f_ca(n) | f_co(n) | ln(OR) | STDerr |
|--|-----|------|---------|---------|---------|--------|--------|
|--|-----|------|---------|---------|---------|--------|--------|

PGC\_SCZ wave3 eur only

|    |      |          |              |              |       |       |
|----|------|----------|--------------|--------------|-------|-------|
| 27 | 1.00 | 2.34e-08 | 0.359(53386) | 0.369(77258) | -0.05 | 0.009 |
|----|------|----------|--------------|--------------|-------|-------|

PGC\_SCZ wave3 asn only

|   |      |       |              |              |        |       |
|---|------|-------|--------------|--------------|--------|-------|
| 4 | 0.82 | 0.271 | 0.038(11136) | 0.039(10839) | -0.072 | 0.066 |
|---|------|-------|--------------|--------------|--------|-------|

PGC\_SCZ wave2 only

|    |      |          |              |              |        |       |
|----|------|----------|--------------|--------------|--------|-------|
| 24 | 1.00 | 2.14e-05 | 0.338(34850) | 0.358(44347) | -0.049 | 0.012 |
|----|------|----------|--------------|--------------|--------|-------|

PGC\_SCZ wave3 (excl. wave2)

|   |      |          |              |              |        |       |
|---|------|----------|--------------|--------------|--------|-------|
| 7 | 0.95 | 0.000157 | 0.262(29672) | 0.298(43750) | -0.053 | 0.014 |
|---|------|----------|--------------|--------------|--------|-------|

PGC\_SCZ wave3 (incl. wave2)

|    |      |          |              |              |        |       |
|----|------|----------|--------------|--------------|--------|-------|
| 31 | 0.98 | 1.33e-08 | 0.303(64522) | 0.328(88097) | -0.051 | 0.009 |
|----|------|----------|--------------|--------------|--------|-------|

Decode – Replication

|   |      |       |             |               |        |      |
|---|------|-------|-------------|---------------|--------|------|
| 0 | 1.00 | 0.961 | 0.335(1979) | 0.367(142627) | -0.053 | 0.04 |
|---|------|-------|-------------|---------------|--------|------|

PGC\_SCZ wave3 (incl. wave2 and replication)

|    |      |          |              |               |        |       |
|----|------|----------|--------------|---------------|--------|-------|
| 31 | 0.99 | 3.06e-08 | 0.304(66501) | 0.352(230724) | -0.048 | 0.009 |
|----|------|----------|--------------|---------------|--------|-------|

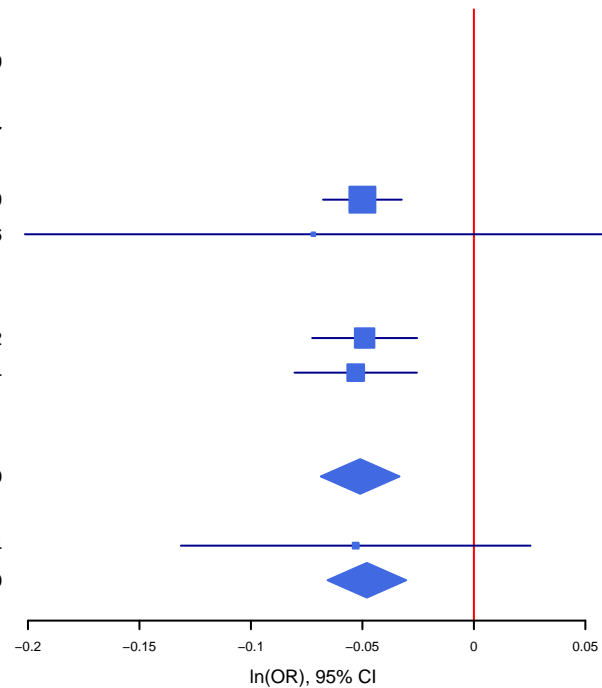

rs11160502

G/A

14:99667179

—

het\_P:

0.475

het\_I:

0.0

|  | ngt | info | p_value | f_ca(n) | f_co(n) | ln(OR) | STDerr |
|--|-----|------|---------|---------|---------|--------|--------|
|--|-----|------|---------|---------|---------|--------|--------|

PGC\_SCZ wave3 eur only

|    |      |          |              |              |       |       |
|----|------|----------|--------------|--------------|-------|-------|
| 30 | 0.98 | 1.12e-07 | 0.581(53386) | 0.567(77258) | 0.047 | 0.009 |
|----|------|----------|--------------|--------------|-------|-------|

PGC\_SCZ wave3 asn only

|   |      |       |              |              |      |       |
|---|------|-------|--------------|--------------|------|-------|
| 5 | 0.89 | 0.799 | 0.929(14004) | 0.933(16757) | 0.01 | 0.037 |
|---|------|-------|--------------|--------------|------|-------|

PGC\_SCZ wave2 only

|   |      |          |              |              |      |       |
|---|------|----------|--------------|--------------|------|-------|
| 2 | 0.98 | 9.19e-06 | 0.602(34850) | 0.578(44347) | 0.05 | 0.011 |
|---|------|----------|--------------|--------------|------|-------|

PGC\_SCZ wave3 (excl. wave2)

|    |      |         |              |              |       |       |
|----|------|---------|--------------|--------------|-------|-------|
| 33 | 0.95 | 0.00437 | 0.708(32540) | 0.681(49668) | 0.037 | 0.013 |
|----|------|---------|--------------|--------------|-------|-------|

PGC\_SCZ wave3 (incl. wave2)

|    |      |          |              |              |       |       |
|----|------|----------|--------------|--------------|-------|-------|
| 35 | 0.96 | 1.75e-07 | 0.653(67390) | 0.633(94015) | 0.045 | 0.009 |
|----|------|----------|--------------|--------------|-------|-------|

Decode – Replication

|   |      |        |             |               |       |       |
|---|------|--------|-------------|---------------|-------|-------|
| 0 | 1.00 | 0.0334 | 0.584(1979) | 0.592(142627) | 0.037 | 0.039 |
|---|------|--------|-------------|---------------|-------|-------|

PGC\_SCZ wave3 (incl. wave2 and replication)

|    |      |          |              |               |       |       |
|----|------|----------|--------------|---------------|-------|-------|
| 35 | 0.98 | 3.13e-08 | 0.651(69369) | 0.608(236642) | 0.047 | 0.008 |
|----|------|----------|--------------|---------------|-------|-------|

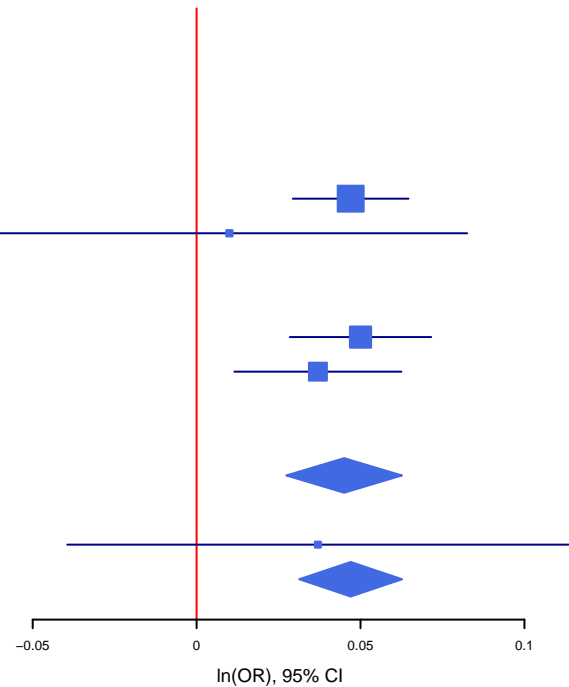

|                                                    |          |             |                 |                     |                      |               |              |
|----------------------------------------------------|----------|-------------|-----------------|---------------------|----------------------|---------------|--------------|
| rs1325994                                          | G/A      |             | 10:18657521     |                     |                      |               |              |
|                                                    | ++       |             | het_P:          |                     | 0.145                | het_I:        | 52.9         |
|                                                    | ngt      | info        | p_value         | f_ca(n)             | f_co(n)              | ln(OR)        | STDerr       |
| PGC_SCZ wave3 eur only                             | 0        | 1.00        | 8.35e-08        | 0.454(53386)        | 0.463(77258)         | -0.046        | 0.009        |
| PGC_SCZ wave3 asn only                             | 0        | 0.95        | 0.753           | 0.074(14004)        | 0.069(16757)         | -0.011        | 0.036        |
| PGC_SCZ wave2 only                                 | 0        | 1.00        | 0.00208         | 0.433(34850)        | 0.449(44347)         | -0.034        | 0.011        |
| PGC_SCZ wave3 (excl. wave2)                        | 0        | 0.98        | 5.81e-06        | 0.314(32540)        | 0.344(49668)         | -0.059        | 0.013        |
| <b>PGC_SCZ wave3 (incl. wave2)</b>                 | <b>0</b> | <b>0.99</b> | <b>1.26e-07</b> | <b>0.375(67390)</b> | <b>0.393(94015)</b>  | <b>-0.044</b> | <b>0.008</b> |
| Decode – Replication                               | 0        | 1.00        | 0.0854          | 0.44(1979)          | 0.428(142627)        | -0.059        | 0.038        |
| <b>PGC_SCZ wave3 (incl. wave2 and replication)</b> | <b>0</b> | <b>1.00</b> | <b>3.17e-08</b> | <b>0.377(69369)</b> | <b>0.414(236642)</b> | <b>-0.045</b> | <b>0.008</b> |

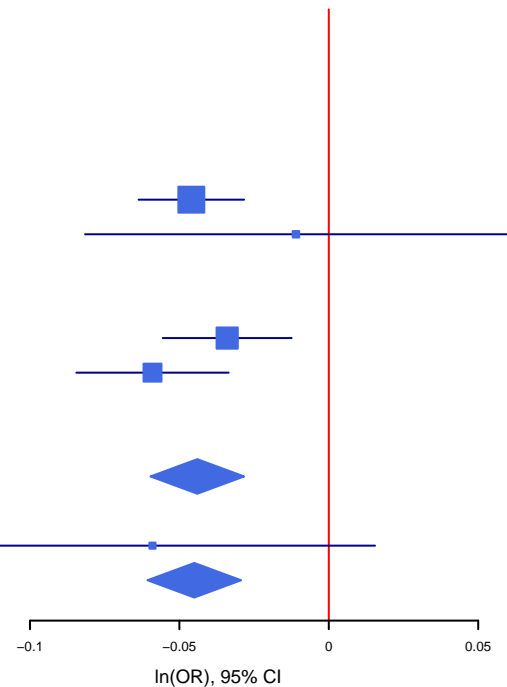

rs7845103

|     |                          |
|-----|--------------------------|
| A/C | 8:17084866               |
| —   | het_P: 0.002 het_I: 89.6 |

|                                             | ngt | info | p_value  | f_ca(n)      | f_co(n)       | ln(OR) | STDerr |
|---------------------------------------------|-----|------|----------|--------------|---------------|--------|--------|
| PGC_SCZ wave3 eur only                      | 47  | 1.00 | 1.04e-07 | 0.736(53386) | 0.744(77258)  | -0.053 | 0.01   |
| PGC_SCZ wave3 asn only                      | 8   | 0.97 | 0.23     | 0.292(14004) | 0.289(16757)  | -0.024 | 0.02   |
| PGC_SCZ wave2 only                          | 38  | 0.99 | 2.87e-09 | 0.708(34850) | 0.734(44347)  | -0.074 | 0.012  |
| PGC_SCZ wave3 (excl. wave2)                 | 17  | 0.99 | 0.126    | 0.574(32540) | 0.599(49668)  | -0.019 | 0.012  |
| PGC_SCZ wave3 (incl. wave2)                 | 55  | 0.99 | 1.21e-07 | 0.644(67390) | 0.663(94015)  | -0.047 | 0.009  |
| Decode – Replication                        | 0   | 1.00 | 0.108    | 0.731(1979)  | 0.74(142627)  | -0.019 | 0.041  |
| PGC_SCZ wave3 (incl. wave2 and replication) | 55  | 1.00 | 3.25e-08 | 0.646(69369) | 0.709(236642) | -0.048 | 0.009  |

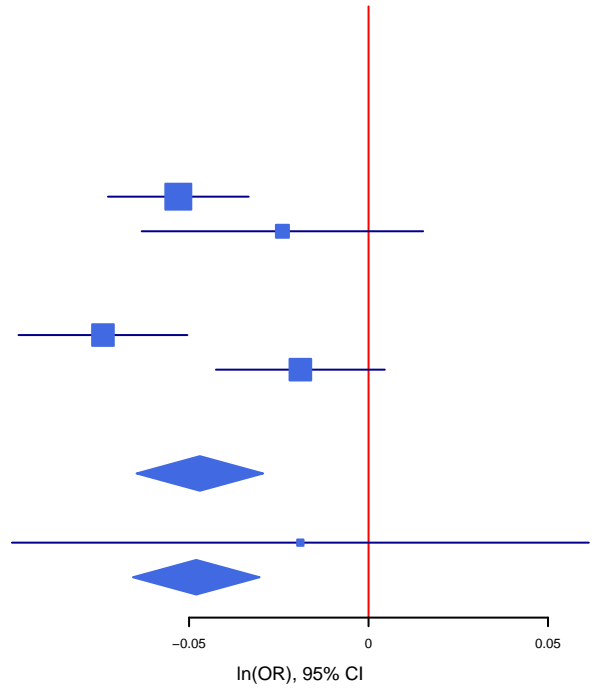

rs529486

C/T  
++  
12:99539881  
het\_P: 0.36  
het\_I: 0.0

|                                             | ngt | info | p_value  | f_ca(n)      | f_co(n)       | ln(OR) | STDerr |
|---------------------------------------------|-----|------|----------|--------------|---------------|--------|--------|
| PGC_SCZ wave3 eur only                      | 1   | 1.00 | 1.48e-07 | 0.221(53386) | 0.23(77258)   | -0.054 | 0.01   |
| PGC_SCZ wave3 asn only                      | nan | nan  | nan      | nan(nan)     | nan(nan)      | nan    | nan    |
| PGC_SCZ wave2 only                          | 1   | 0.99 | 3.46e-06 | 0.22(32998)  | 0.229(43387)  | -0.062 | 0.013  |
| PGC_SCZ wave3 (excl. wave2)                 | 0   | 0.94 | 0.00967  | 0.181(25345) | 0.203(38815)  | -0.042 | 0.016  |
| PGC_SCZ wave3 (incl. wave2)                 | 1   | 0.97 | 1.65e-07 | 0.203(58343) | 0.217(82202)  | -0.054 | 0.01   |
| Decode – Replication                        | 0   | 1.00 | 0.0562   | 0.239(1979)  | 0.219(142627) | -0.042 | 0.046  |
| PGC_SCZ wave3 (incl. wave2 and replication) | 1   | 0.99 | 3.31e-08 | 0.204(60322) | 0.218(224829) | -0.056 | 0.01   |

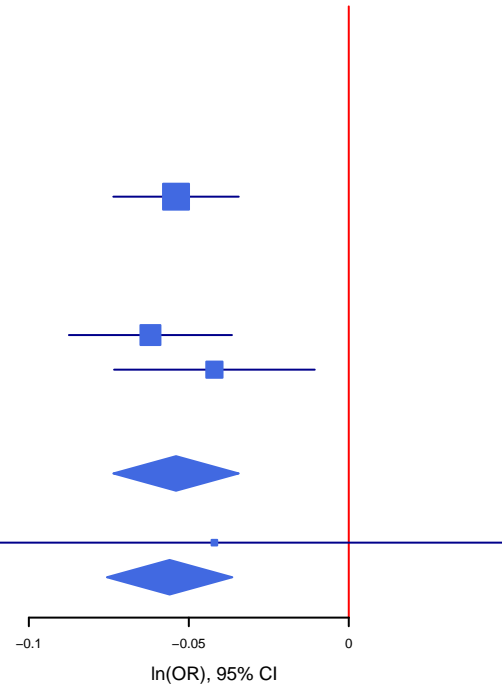

rs154433

G/A

16:58659808

—

het\_P:

0.539

het\_I:

0.0

| ngt | info | p_value | f_ca(n) | f_co(n) | ln(OR) | STDerr |
|-----|------|---------|---------|---------|--------|--------|
|-----|------|---------|---------|---------|--------|--------|

PGC\_SCZ wave3 eur only

|    |      |          |              |              |       |       |
|----|------|----------|--------------|--------------|-------|-------|
| 48 | 1.00 | 3.83e-08 | 0.567(53386) | 0.552(77258) | 0.048 | 0.009 |
|----|------|----------|--------------|--------------|-------|-------|

PGC\_SCZ wave3 asn only

|   |      |       |              |              |       |       |
|---|------|-------|--------------|--------------|-------|-------|
| 5 | 0.93 | 0.317 | 0.936(14004) | 0.936(16757) | 0.037 | 0.037 |
|---|------|-------|--------------|--------------|-------|-------|

PGC\_SCZ wave2 only

|    |      |         |              |              |       |       |
|----|------|---------|--------------|--------------|-------|-------|
| 12 | 1.00 | 3.4e-06 | 0.589(34850) | 0.563(44347) | 0.052 | 0.011 |
|----|------|---------|--------------|--------------|-------|-------|

PGC\_SCZ wave3 (excl. wave2)

|    |      |        |              |              |       |       |
|----|------|--------|--------------|--------------|-------|-------|
| 41 | 0.98 | 0.0016 | 0.702(32540) | 0.671(49668) | 0.041 | 0.013 |
|----|------|--------|--------------|--------------|-------|-------|

PGC\_SCZ wave3 (incl. wave2)

|    |      |          |              |             |       |       |
|----|------|----------|--------------|-------------|-------|-------|
| 53 | 0.99 | 2.38e-08 | 0.643(67390) | 0.62(94015) | 0.047 | 0.008 |
|----|------|----------|--------------|-------------|-------|-------|

Decode – Replication

|   |      |       |             |               |       |       |
|---|------|-------|-------------|---------------|-------|-------|
| 0 | 1.00 | 0.865 | 0.574(1979) | 0.578(142627) | 0.041 | 0.038 |
|---|------|-------|-------------|---------------|-------|-------|

PGC\_SCZ wave3 (incl. wave2 and replication)

|    |      |          |              |               |       |       |
|----|------|----------|--------------|---------------|-------|-------|
| 53 | 0.99 | 3.35e-08 | 0.641(69369) | 0.594(236642) | 0.045 | 0.008 |
|----|------|----------|--------------|---------------|-------|-------|

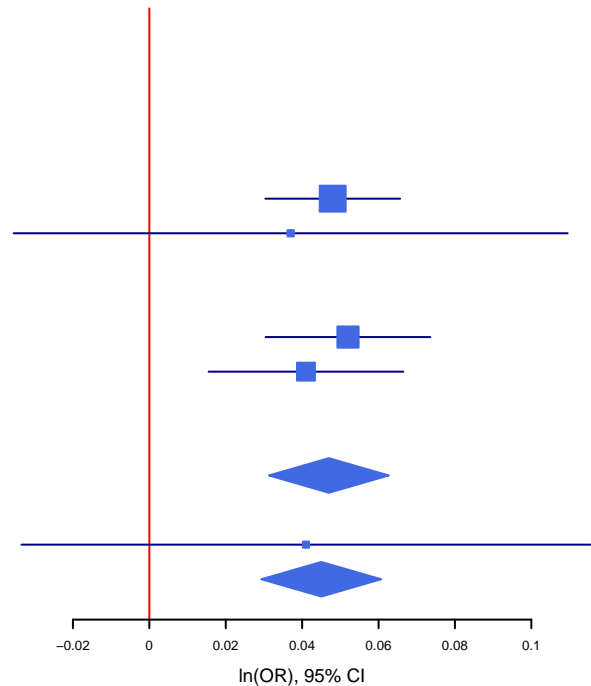

| rs1593769                                          | T/C      |             | 4:167964906     |                     |                      |              |              |
|----------------------------------------------------|----------|-------------|-----------------|---------------------|----------------------|--------------|--------------|
|                                                    | ++       |             | het_P:          |                     | 0.55                 | het_I:       | 0.0          |
|                                                    | ngt      | info        | p_value         | f_ca(n)             | f_co(n)              | ln(OR)       | STDerr       |
| PGC_SCZ wave3 eur only                             | 1        | 0.99        | 5.8e-08         | 0.418(53386)        | 0.406(77258)         | 0.048        | 0.009        |
| PGC_SCZ wave3 asn only                             | 0        | 0.98        | 0.466           | 0.171(14004)        | 0.166(16757)         | 0.017        | 0.023        |
| PGC_SCZ wave2 only                                 | 1        | 0.99        | 1.5e-05         | 0.404(34850)        | 0.399(44347)         | 0.048        | 0.011        |
| PGC_SCZ wave3 (excl. wave2)                        | 0        | 0.98        | 0.00159         | 0.327(32540)        | 0.332(49668)         | 0.038        | 0.012        |
| <b>PGC_SCZ wave3 (incl. wave2)</b>                 | <b>1</b> | <b>0.99</b> | <b>1.01e-07</b> | <b>0.367(67390)</b> | <b>0.364(94015)</b>  | <b>0.044</b> | <b>0.008</b> |
| Decode – Replication                               | 0        | 1.00        | 0.138           | 0.38(1979)          | 0.38(142627)         | 0.038        | 0.039        |
| <b>PGC_SCZ wave3 (incl. wave2 and replication)</b> | <b>1</b> | <b>0.99</b> | <b>3.38e-08</b> | <b>0.367(69369)</b> | <b>0.373(236642)</b> | <b>0.044</b> | <b>0.008</b> |

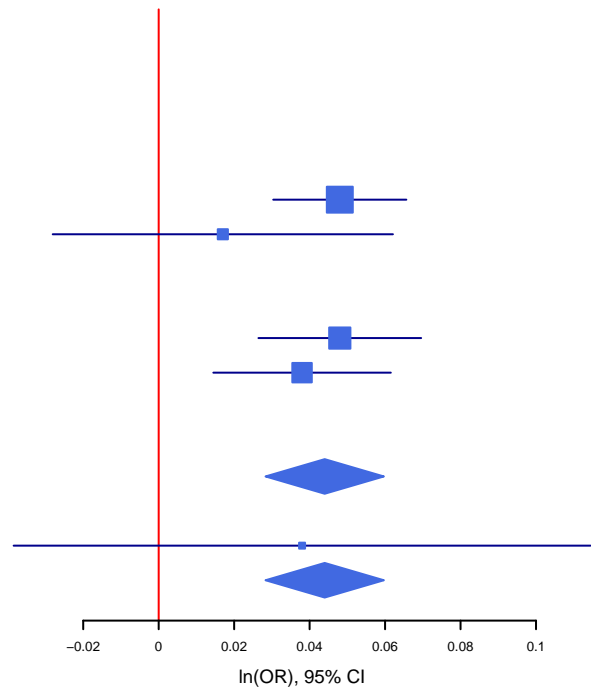

| rs4298523                                          | G/A       |             | 8:18420955      |                     |                      |              |              |
|----------------------------------------------------|-----------|-------------|-----------------|---------------------|----------------------|--------------|--------------|
|                                                    | --        |             | het_P:          | 0.456               | het_I:               | 0.0          |              |
|                                                    | ngt       | info        | p_value         | f_ca(n)             | f_co(n)              | ln(OR)       | STDerr       |
| PGC_SCZ wave3 eur only                             | 13        | 0.99        | 9.57e-07        | 0.451(53386)        | 0.439(77258)         | 0.043        | 0.009        |
| PGC_SCZ wave3 asn only                             | 4         | 0.98        | 0.0187          | 0.612(14004)        | 0.605(16757)         | 0.041        | 0.018        |
| PGC_SCZ wave2 only                                 | 13        | 0.99        | 1.1e-05         | 0.462(34850)        | 0.444(44347)         | 0.048        | 0.011        |
| PGC_SCZ wave3 (excl. wave2)                        | 4         | 0.99        | 0.00103         | 0.508(32540)        | 0.49(49668)          | 0.036        | 0.011        |
| <b>PGC_SCZ wave3 (incl. wave2)</b>                 | <b>17</b> | <b>0.99</b> | <b>5.49e-08</b> | <b>0.484(67390)</b> | <b>0.468(94015)</b>  | <b>0.042</b> | <b>0.008</b> |
| Decode – Replication                               | 0         | 1.00        | 0.314           | 0.442(1979)         | 0.419(142627)        | 0.036        | 0.038        |
| <b>PGC_SCZ wave3 (incl. wave2 and replication)</b> | <b>17</b> | <b>1.00</b> | <b>3.49e-08</b> | <b>0.483(69369)</b> | <b>0.438(236642)</b> | <b>0.042</b> | <b>0.008</b> |

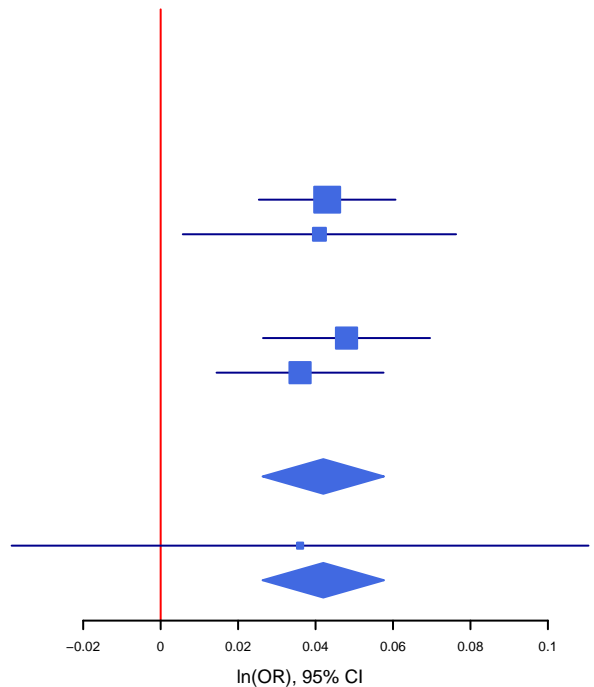



rs1542560

C/T

6:125004513

++

het\_P: 0.669

het\_I: 0.0

|                                             | ngt | info | p_value  | f_ca(n)      | f_co(n)       | ln(OR) | STDerr |
|---------------------------------------------|-----|------|----------|--------------|---------------|--------|--------|
| PGC_SCZ wave3 eur only                      | 1   | 0.98 | 4.35e-07 | 0.423(53386) | 0.438(77258)  | -0.044 | 0.009  |
| PGC_SCZ wave3 asn only                      | 0   | 0.90 | 0.0875   | 0.248(14004) | 0.253(16757)  | -0.035 | 0.021  |
| PGC_SCZ wave2 only                          | 1   | 0.98 | 0.000357 | 0.415(34850) | 0.43(44347)   | -0.04  | 0.011  |
| PGC_SCZ wave3 (excl. wave2)                 | 0   | 0.96 | 7.3e-05  | 0.356(32540) | 0.383(49668)  | -0.047 | 0.012  |
| PGC_SCZ wave3 (incl. wave2)                 | 1   | 0.97 | 1.04e-07 | 0.387(67390) | 0.405(94015)  | -0.043 | 0.008  |
| Decode – Replication                        | 0   | 1.00 | 0.109    | 0.439(1979)  | 0.458(142627) | -0.047 | 0.038  |
| PGC_SCZ wave3 (incl. wave2 and replication) | 1   | 0.99 | 3.51e-08 | 0.388(69369) | 0.437(236642) | -0.044 | 0.008  |

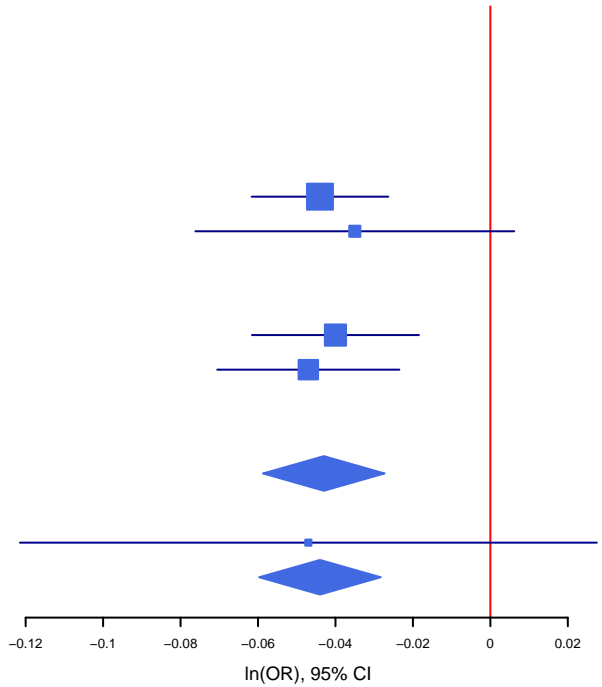

| rs61838369                                         | G/C      |             | 1:146964465     |                     |                      |               |             |
|----------------------------------------------------|----------|-------------|-----------------|---------------------|----------------------|---------------|-------------|
|                                                    | ++       |             | het_P:          | 0.625               | het_I:               | 0.0           |             |
|                                                    | ngt      | info        | p_value         | f_ca(n)             | f_co(n)              | ln(OR)        | STDerr      |
| PGC_SCZ wave3 eur only                             | 0        | 0.99        | 3.42e-05        | 0.852(53386)        | 0.855(77258)         | -0.051        | 0.012       |
| PGC_SCZ wave3 asn only                             | 0        | 0.99        | 0.00207         | 0.775(14004)        | 0.789(16757)         | -0.064        | 0.021       |
| PGC_SCZ wave2 only                                 | 0        | 0.99        | 0.00128         | 0.844(34850)        | 0.851(44347)         | -0.049        | 0.015       |
| PGC_SCZ wave3 (excl. wave2)                        | 0        | 0.99        | 5.57e-05        | 0.827(32540)        | 0.837(49668)         | -0.059        | 0.015       |
| <b>PGC_SCZ wave3 (incl. wave2)</b>                 | <b>0</b> | <b>0.99</b> | <b>2.82e-07</b> | <b>0.836(67390)</b> | <b>0.844(94015)</b>  | <b>-0.054</b> | <b>0.01</b> |
| Decode – Replication                               | 0        | 1.00        | 0.0177          | 0.874(1979)         | 0.864(142627)        | -0.059        | 0.054       |
| <b>PGC_SCZ wave3 (incl. wave2 and replication)</b> | <b>0</b> | <b>1.00</b> | <b>3.58e-08</b> | <b>0.837(69369)</b> | <b>0.856(236642)</b> | <b>-0.057</b> | <b>0.01</b> |

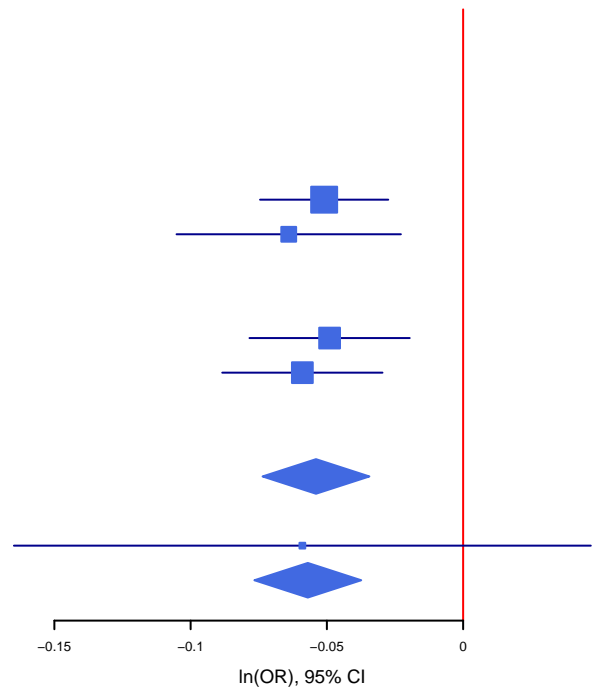

rs113239787

C/A

14:59915960

—

het\_P:

0.342

het\_I:

0.0

|  | ngt | info | p_value | f_ca(n) | f_co(n) | ln(OR) | STDerr |
|--|-----|------|---------|---------|---------|--------|--------|
|--|-----|------|---------|---------|---------|--------|--------|

PGC\_SCZ wave3 eur only

|   |      |          |              |              |       |       |
|---|------|----------|--------------|--------------|-------|-------|
| 0 | 1.00 | 4.21e-07 | 0.947(53386) | 0.941(77258) | 0.095 | 0.019 |
|---|------|----------|--------------|--------------|-------|-------|

PGC\_SCZ wave3 asn only

|   |      |       |              |              |       |       |
|---|------|-------|--------------|--------------|-------|-------|
| 0 | 0.93 | 0.281 | 0.982(13513) | 0.981(16078) | 0.071 | 0.066 |
|---|------|-------|--------------|--------------|-------|-------|

PGC\_SCZ wave2 only

|   |      |          |              |              |       |       |
|---|------|----------|--------------|--------------|-------|-------|
| 0 | 1.00 | 5.77e-06 | 0.948(34850) | 0.941(44347) | 0.108 | 0.024 |
|---|------|----------|--------------|--------------|-------|-------|

PGC\_SCZ wave3 (excl. wave2)

|   |      |         |             |              |       |       |
|---|------|---------|-------------|--------------|-------|-------|
| 0 | 0.98 | 0.00828 | 0.96(32049) | 0.954(48989) | 0.073 | 0.028 |
|---|------|---------|-------------|--------------|-------|-------|

**PGC\_SCZ wave3 (incl. wave2)**

|          |             |                 |                     |                     |              |              |
|----------|-------------|-----------------|---------------------|---------------------|--------------|--------------|
| <b>0</b> | <b>0.99</b> | <b>2.46e-07</b> | <b>0.954(66899)</b> | <b>0.948(93336)</b> | <b>0.093</b> | <b>0.018</b> |
|----------|-------------|-----------------|---------------------|---------------------|--------------|--------------|

Decode – Replication

|   |      |        |             |               |       |       |
|---|------|--------|-------------|---------------|-------|-------|
| 0 | 1.00 | 0.0319 | 0.931(1979) | 0.936(142627) | 0.073 | 0.078 |
|---|------|--------|-------------|---------------|-------|-------|

**PGC\_SCZ wave3 (incl. wave2 and replication)**

|          |             |                 |                     |                      |              |              |
|----------|-------------|-----------------|---------------------|----------------------|--------------|--------------|
| <b>0</b> | <b>0.99</b> | <b>3.78e-08</b> | <b>0.953(68878)</b> | <b>0.941(235963)</b> | <b>0.097</b> | <b>0.018</b> |
|----------|-------------|-----------------|---------------------|----------------------|--------------|--------------|

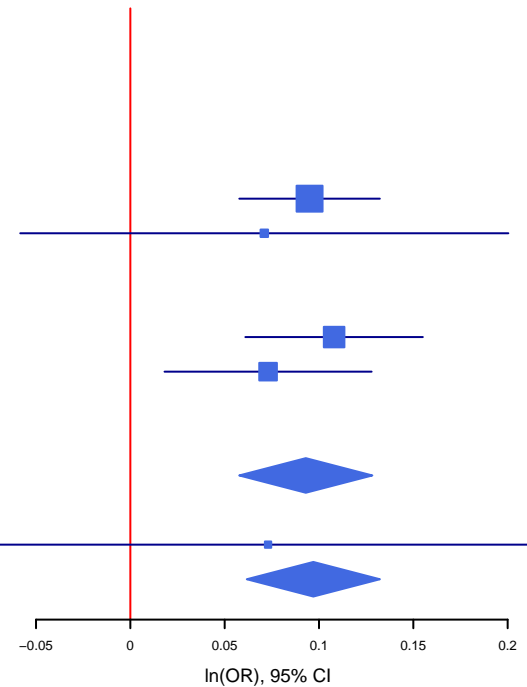

| rs13233308                                         | C/T       |             | 7:87244960      |                     |                      |              |              |
|----------------------------------------------------|-----------|-------------|-----------------|---------------------|----------------------|--------------|--------------|
|                                                    | --        |             | het_P:          | 0.452               | het_I:               | 0.0          |              |
|                                                    | ngt       | info        | p_value         | f_ca(n)             | f_co(n)              | ln(OR)       | STDerr       |
| PGC_SCZ wave3 eur only                             | 50        | 0.99        | 1.75e-08        | 0.526(53386)        | 0.516(77258)         | 0.049        | 0.009        |
| PGC_SCZ wave3 asn only                             | 9         | 0.97        | 0.366           | 0.507(14004)        | 0.504(16757)         | 0.015        | 0.017        |
| PGC_SCZ wave2 only                                 | 18        | 0.98        | 1.23e-05        | 0.524(34850)        | 0.513(44347)         | 0.048        | 0.011        |
| PGC_SCZ wave3 (excl. wave2)                        | 41        | 0.99        | 0.000898        | 0.521(32540)        | 0.515(49668)         | 0.036        | 0.011        |
| <b>PGC_SCZ wave3 (incl. wave2)</b>                 | <b>59</b> | <b>0.99</b> | <b>5.39e-08</b> | <b>0.522(67390)</b> | <b>0.514(94015)</b>  | <b>0.042</b> | <b>0.008</b> |
| Decode – Replication                               | 0         | 1.00        | 0.436           | 0.488(1979)         | 0.488(142627)        | 0.036        | 0.038        |
| <b>PGC_SCZ wave3 (incl. wave2 and replication)</b> | <b>59</b> | <b>0.99</b> | <b>3.79e-08</b> | <b>0.521(69369)</b> | <b>0.498(236642)</b> | <b>0.041</b> | <b>0.008</b> |

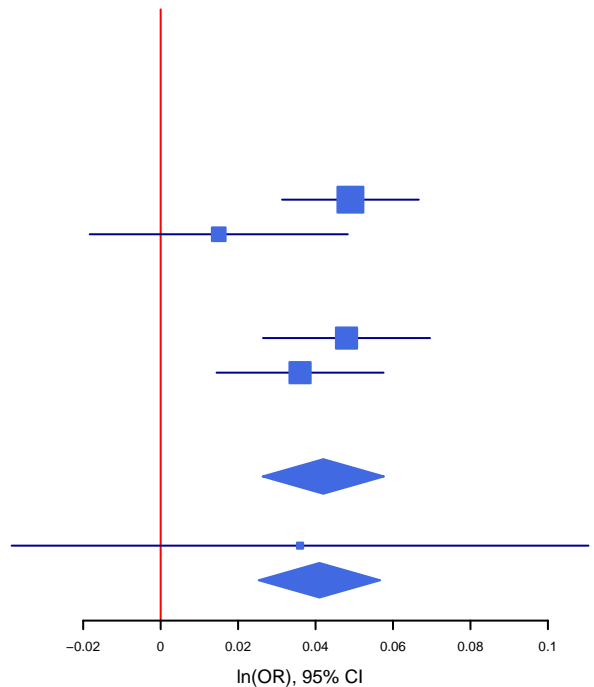

rs13142920

C/A

4:176728614

—

het\_P:

0.924

het\_I:

0.0

|  | ngt | info | p_value | f_ca(n) | f_co(n) | ln(OR) | STDerr |
|--|-----|------|---------|---------|---------|--------|--------|
|--|-----|------|---------|---------|---------|--------|--------|

PGC\_SCZ wave3 eur only

|    |      |          |              |             |       |       |
|----|------|----------|--------------|-------------|-------|-------|
| 28 | 0.98 | 0.000293 | 0.862(53386) | 0.86(77258) | 0.046 | 0.013 |
|----|------|----------|--------------|-------------|-------|-------|

PGC\_SCZ wave3 asn only

|   |      |          |              |              |       |       |
|---|------|----------|--------------|--------------|-------|-------|
| 6 | 0.90 | 4.55e-05 | 0.689(14004) | 0.669(16757) | 0.078 | 0.019 |
|---|------|----------|--------------|--------------|-------|-------|

PGC\_SCZ wave2 only

|    |      |          |              |              |       |       |
|----|------|----------|--------------|--------------|-------|-------|
| 25 | 0.99 | 0.000459 | 0.854(34850) | 0.854(44347) | 0.054 | 0.016 |
|----|------|----------|--------------|--------------|-------|-------|

PGC\_SCZ wave3 (excl. wave2)

|   |      |          |              |              |       |       |
|---|------|----------|--------------|--------------|-------|-------|
| 9 | 0.94 | 8.49e-05 | 0.796(32540) | 0.801(49668) | 0.057 | 0.014 |
|---|------|----------|--------------|--------------|-------|-------|

PGC\_SCZ wave3 (incl. wave2)

|    |      |          |              |              |       |       |
|----|------|----------|--------------|--------------|-------|-------|
| 34 | 0.96 | 1.41e-07 | 0.826(67390) | 0.826(94015) | 0.056 | 0.011 |
|----|------|----------|--------------|--------------|-------|-------|

Decode – Replication

|   |      |        |             |               |       |       |
|---|------|--------|-------------|---------------|-------|-------|
| 0 | 1.00 | 0.0725 | 0.829(1979) | 0.837(142627) | 0.057 | 0.052 |
|---|------|--------|-------------|---------------|-------|-------|

PGC\_SCZ wave3 (incl. wave2 and replication)

|    |      |          |              |               |       |      |
|----|------|----------|--------------|---------------|-------|------|
| 34 | 0.99 | 3.83e-08 | 0.826(69369) | 0.833(236642) | 0.057 | 0.01 |
|----|------|----------|--------------|---------------|-------|------|

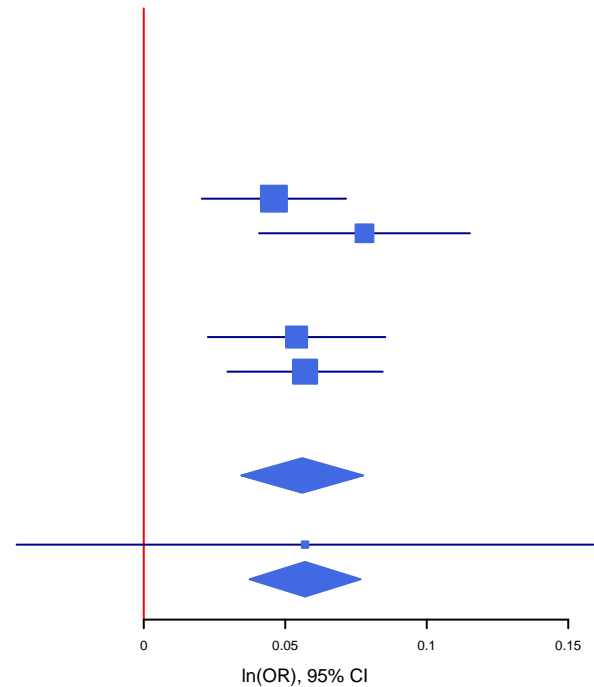

| rs76365544                                         | G/C      |             | 22:44146279     |                    |                      |              |              |
|----------------------------------------------------|----------|-------------|-----------------|--------------------|----------------------|--------------|--------------|
|                                                    | --       |             | het_P:          |                    | 0.146                | het_I:       | 52.7         |
|                                                    | ngt      | info        | p_value         | f_ca(n)            | f_co(n)              | ln(OR)       | STDerr       |
| PGC_SCZ wave3 eur only                             | 0        | 0.81        | 4.74e-07        | 0.98(52134)        | 0.977(74584)         | 0.17         | 0.034        |
| PGC_SCZ wave3 asn only                             | nan      | nan         | nan             | nan(nan)           | nan(nan)             | nan          | nan          |
| PGC_SCZ wave2 only                                 | 0        | 0.84        | 1.01e-06        | 0.981(31746)       | 0.977(40713)         | 0.212        | 0.043        |
| PGC_SCZ wave3 (excl. wave2)                        | 0        | 0.76        | 0.0349          | 0.98(22087)        | 0.977(35570)         | 0.112        | 0.053        |
| <b>PGC_SCZ wave3 (incl. wave2)</b>                 | <b>0</b> | <b>0.80</b> | <b>3.01e-07</b> | <b>0.98(53833)</b> | <b>0.977(76283)</b>  | <b>0.172</b> | <b>0.034</b> |
| Decode – Replication                               | 0        | 1.00        | 0.0268          | 0.98(1979)         | 0.97(142627)         | 0.112        | 0.144        |
| <b>PGC_SCZ wave3 (incl. wave2 and replication)</b> | <b>0</b> | <b>0.93</b> | <b>3.85e-08</b> | <b>0.98(55812)</b> | <b>0.972(218910)</b> | <b>0.18</b>  | <b>0.033</b> |

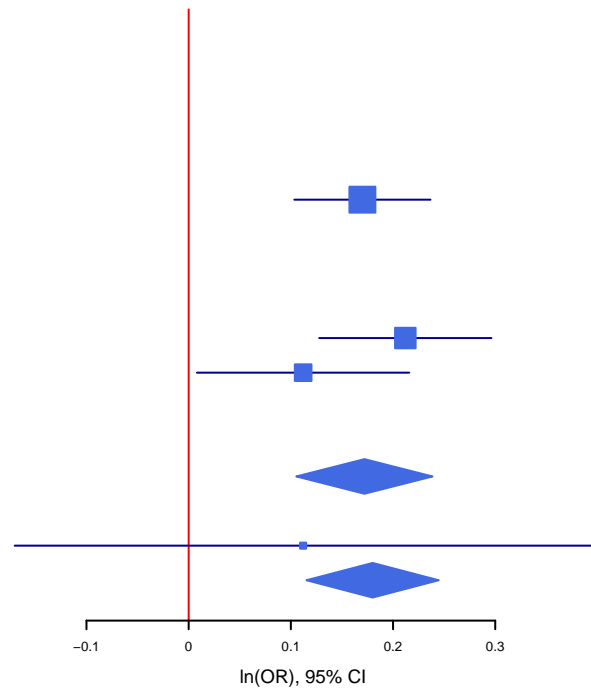

|                                                    |            |             |                 |            |                     |                     |                   |               |        |     |  |  |
|----------------------------------------------------|------------|-------------|-----------------|------------|---------------------|---------------------|-------------------|---------------|--------|-----|--|--|
| <b>rs71323641</b>                                  |            |             |                 | <b>T/C</b> |                     |                     | <b>3:37952542</b> |               |        |     |  |  |
|                                                    |            |             |                 | ++         |                     |                     | het_P:            | 0.846         | het_I: | 0.0 |  |  |
|                                                    | <b>ngt</b> | <b>info</b> | <b>p_value</b>  |            | <b>f_ca(n)</b>      | <b>f_co(n)</b>      | <b>ln(OR)</b>     | <b>STDerr</b> |        |     |  |  |
| PGC_SCZ wave3 eur only                             | 0          | 0.99        | 5.56e-07        |            | 0.892(53386)        | 0.886(77258)        | 0.069             | 0.014         |        |     |  |  |
| PGC_SCZ wave3 asn only                             | 0          | 0.97        | 0.102           |            | 0.937(14004)        | 0.937(16757)        | 0.058             | 0.035         |        |     |  |  |
| PGC_SCZ wave2 only                                 | 0          | 1.00        | 6.32e-05        |            | 0.895(34850)        | 0.887(44347)        | 0.07              | 0.017         |        |     |  |  |
| PGC_SCZ wave3 (excl. wave2)                        | 0          | 0.97        | 0.000636        |            | 0.908(32540)        | 0.901(49668)        | 0.065             | 0.019         |        |     |  |  |
| <b>PGC_SCZ wave3 (incl. wave2)</b>                 | <b>0</b>   | <b>0.98</b> | <b>1.47e-07</b> |            | <b>0.901(67390)</b> | <b>0.895(94015)</b> | <b>0.067</b>      | <b>0.013</b>  |        |     |  |  |
| Decode – Replication                               | 0          | 1.00        | 0.0949          |            | 0.886(1979)         | 0.887(142627)       | 0.065             | 0.061         |        |     |  |  |
| <b>PGC_SCZ wave3 (incl. wave2 and replication)</b> | <b>0</b>   | <b>0.99</b> | <b>3.89e-08</b> |            | <b>0.901(69369)</b> | <b>0.89(236642)</b> | <b>0.069</b>      | <b>0.012</b>  |        |     |  |  |

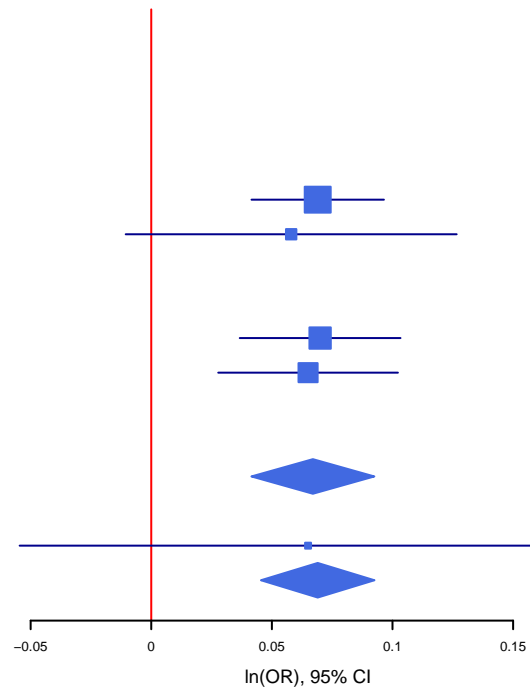

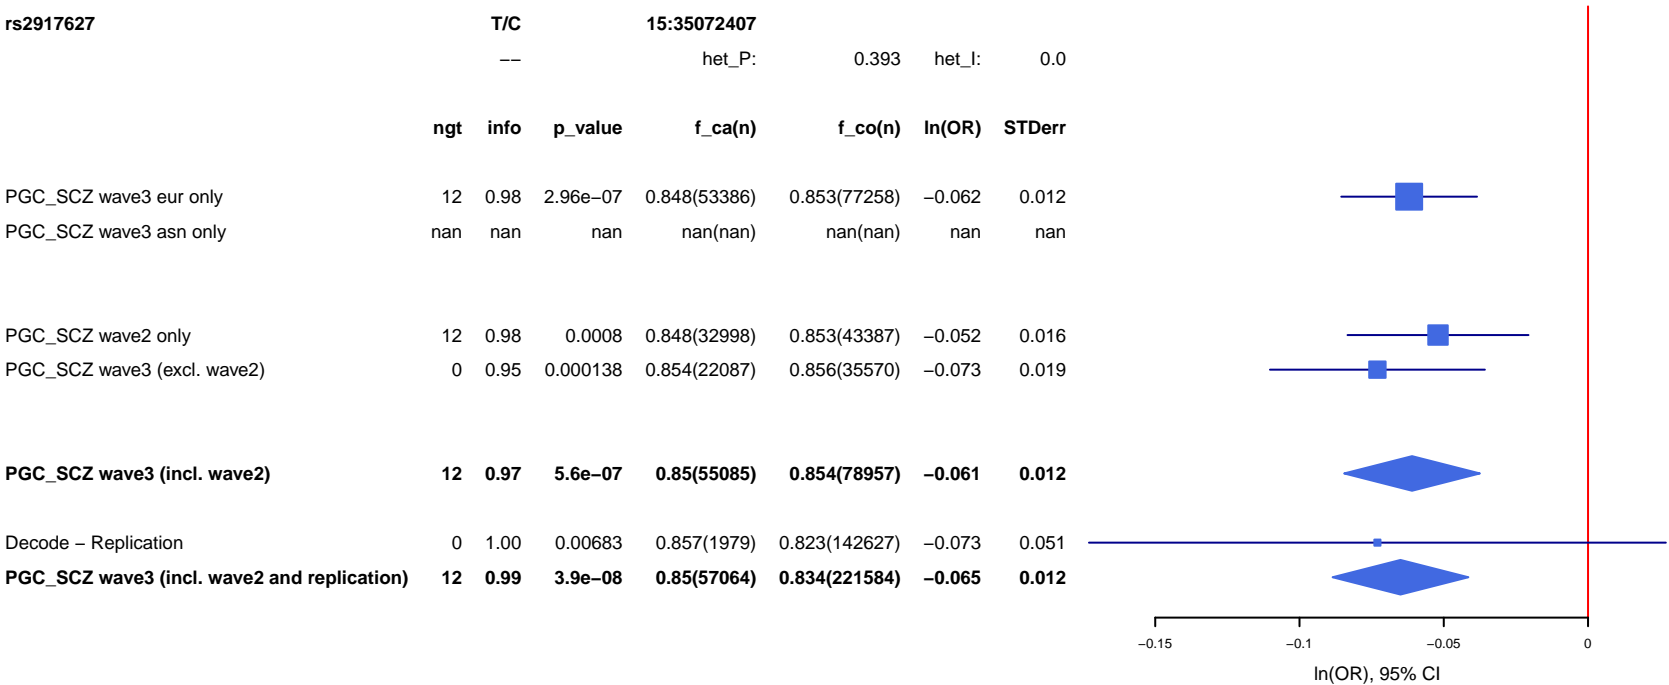



| rs35026989                                         | T/G      |             | 2:155921286     |                     |                     |               |             |
|----------------------------------------------------|----------|-------------|-----------------|---------------------|---------------------|---------------|-------------|
|                                                    | —        |             | het_P:          |                     | 0.647               | het_I:        | 0.0         |
|                                                    | ngt      | info        | p_value         | f_ca(n)             | f_co(n)             | ln(OR)        | STDerr      |
| PGC_SCZ wave3 eur only                             | 0        | 0.99        | 6.03e-08        | 0.768(53386)        | 0.781(77258)        | -0.056        | 0.01        |
| PGC_SCZ wave3 asn only                             | 0        | 0.99        | 0.254           | 0.918(14004)        | 0.922(16757)        | -0.036        | 0.031       |
| PGC_SCZ wave2 only                                 | 0        | 0.99        | 1.05e-05        | 0.777(34850)        | 0.783(44347)        | -0.058        | 0.013       |
| PGC_SCZ wave3 (excl. wave2)                        | 0        | 0.99        | 0.000871        | 0.822(32540)        | 0.827(49668)        | -0.049        | 0.015       |
| <b>PGC_SCZ wave3 (incl. wave2)</b>                 | <b>0</b> | <b>0.99</b> | <b>3.73e-08</b> | <b>0.799(67390)</b> | <b>0.806(94015)</b> | <b>-0.054</b> | <b>0.01</b> |
| Decode – Replication                               | 0        | 1.00        | 0.749           | 0.747(1052)         | 0.747(1399)         | -0.049        | 0.07        |
| <b>PGC_SCZ wave3 (incl. wave2 and replication)</b> | <b>0</b> | <b>0.99</b> | <b>4e-08</b>    | <b>0.798(68442)</b> | <b>0.805(95414)</b> | <b>-0.053</b> | <b>0.01</b> |

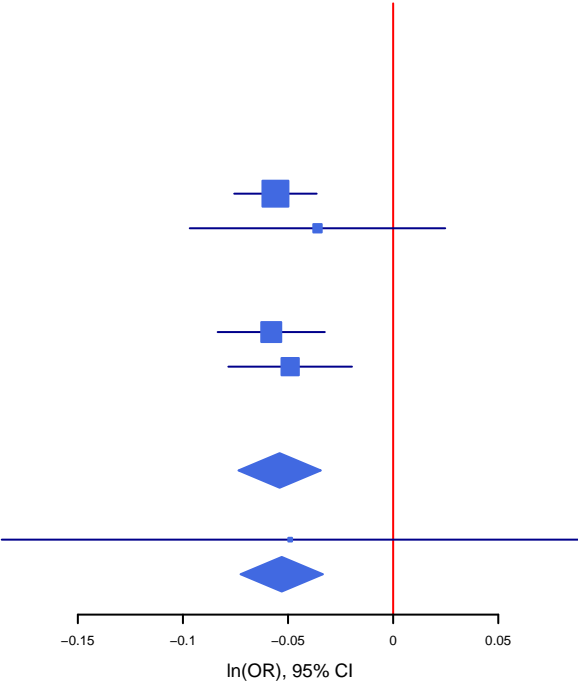

rs1065861

|     |                          |
|-----|--------------------------|
| A/T | 5:88091950               |
| --- | het_P: 0.035 het_I: 77.6 |

|                                             | ngt | info | p_value  | f_ca(n)      | f_co(n)       | ln(OR) | STDerr |
|---------------------------------------------|-----|------|----------|--------------|---------------|--------|--------|
| PGC_SCZ wave3 eur only                      | 0   | 0.97 | 6.43e-08 | 0.05(53386)  | 0.057(77258)  | -0.106 | 0.02   |
| PGC_SCZ wave3 asn only                      | 0   | 0.92 | 0.0778   | 0.078(14004) | 0.079(16757)  | -0.058 | 0.033  |
| PGC_SCZ wave2 only                          | 0   | 0.97 | 7.34e-08 | 0.053(34850) | 0.06(44347)   | -0.13  | 0.024  |
| PGC_SCZ wave3 (excl. wave2)                 | 0   | 0.96 | 0.0125   | 0.058(32540) | 0.062(49668)  | -0.059 | 0.024  |
| PGC_SCZ wave3 (incl. wave2)                 | 0   | 0.97 | 2.95e-08 | 0.056(67390) | 0.061(94015)  | -0.093 | 0.017  |
| Decode - Replication                        | 0   | 1.00 | 0.768    | 0.078(927)   | 0.078(141228) | -0.059 | 0.093  |
| PGC_SCZ wave3 (incl. wave2 and replication) | 0   | 0.99 | 4.02e-08 | 0.056(68317) | 0.071(235243) | -0.091 | 0.017  |

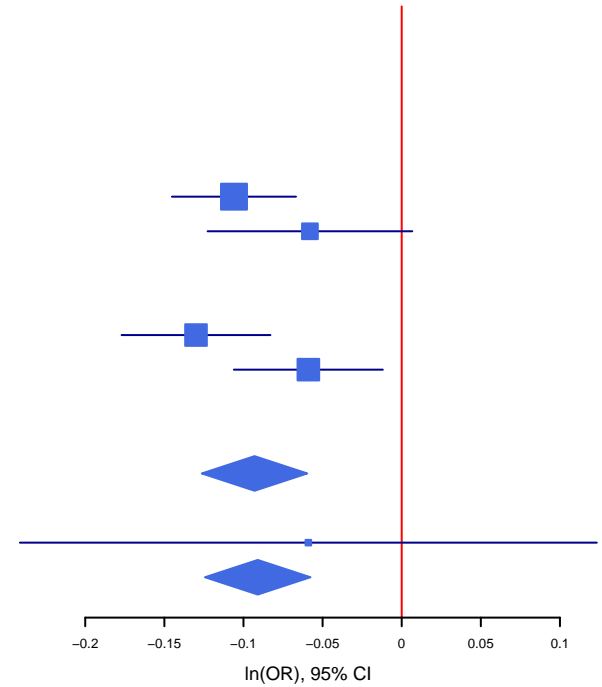

| <b>rs9487653</b>                                   | <b>A/G</b> |             | <b>6:111822689</b> |                     |                      |              |             |
|----------------------------------------------------|------------|-------------|--------------------|---------------------|----------------------|--------------|-------------|
|                                                    | ++         |             | het_P:             | 0.568               | het_I:               | 0.0          |             |
|                                                    | ngt        | info        | p_value            | f_ca(n)             | f_co(n)              | ln(OR)       | STDerr      |
| PGC_SCZ wave3 eur only                             | 0          | 1.00        | 8.9e-08            | 0.219(53386)        | 0.205(77258)         | 0.056        | 0.01        |
| PGC_SCZ wave3 asn only                             | nan        | nan         | nan                | nan(nan)            | nan(nan)             | nan          | nan         |
| PGC_SCZ wave2 only                                 | 0          | 1.00        | 5.66e-06           | 0.216(32998)        | 0.204(43387)         | 0.062        | 0.014       |
| PGC_SCZ wave3 (excl. wave2)                        | 0          | 0.98        | 0.00312            | 0.208(22087)        | 0.197(35570)         | 0.049        | 0.017       |
| <b>PGC_SCZ wave3 (incl. wave2)</b>                 | <b>0</b>   | <b>0.99</b> | <b>7.22e-08</b>    | <b>0.213(55085)</b> | <b>0.201(78957)</b>  | <b>0.057</b> | <b>0.01</b> |
| Decode – Replication                               | 0          | 1.00        | 0.314              | 0.235(1979)         | 0.212(142627)        | 0.049        | 0.045       |
| <b>PGC_SCZ wave3 (incl. wave2 and replication)</b> | <b>0</b>   | <b>1.00</b> | <b>4.07e-08</b>    | <b>0.214(57064)</b> | <b>0.208(221584)</b> | <b>0.056</b> | <b>0.01</b> |

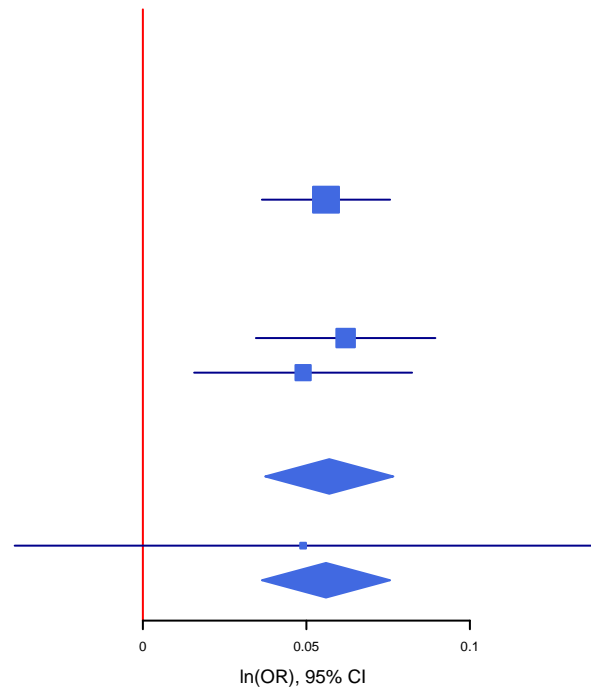

rs11750149

A/G

5:22884888

—

het\_P:

0.498

het\_I:

0.0

| ngt | info | p_value | f_ca(n) | f_co(n) | ln(OR) | STDerr |
|-----|------|---------|---------|---------|--------|--------|
|-----|------|---------|---------|---------|--------|--------|

PGC\_SCZ wave3 eur only

|   |      |          |              |              |        |       |
|---|------|----------|--------------|--------------|--------|-------|
| 1 | 0.90 | 4.46e-07 | 0.861(53386) | 0.867(77258) | -0.067 | 0.013 |
|---|------|----------|--------------|--------------|--------|-------|

PGC\_SCZ wave3 asn only

|     |     |     |          |          |     |     |
|-----|-----|-----|----------|----------|-----|-----|
| nan | nan | nan | nan(nan) | nan(nan) | nan | nan |
|-----|-----|-----|----------|----------|-----|-----|

PGC\_SCZ wave2 only

|   |      |          |              |             |        |       |
|---|------|----------|--------------|-------------|--------|-------|
| 1 | 0.91 | 1.27e-05 | 0.863(32998) | 0.87(43387) | -0.074 | 0.017 |
|---|------|----------|--------------|-------------|--------|-------|

PGC\_SCZ wave3 (excl. wave2)

|   |      |         |              |              |        |       |
|---|------|---------|--------------|--------------|--------|-------|
| 0 | 0.86 | 0.00854 | 0.865(21525) | 0.867(35001) | -0.056 | 0.021 |
|---|------|---------|--------------|--------------|--------|-------|

PGC\_SCZ wave3 (incl. wave2)

|   |      |          |              |              |        |       |
|---|------|----------|--------------|--------------|--------|-------|
| 1 | 0.89 | 4.39e-07 | 0.864(54523) | 0.868(78388) | -0.067 | 0.013 |
|---|------|----------|--------------|--------------|--------|-------|

Decode – Replication

|   |      |        |             |               |        |       |
|---|------|--------|-------------|---------------|--------|-------|
| 0 | 1.00 | 0.0167 | 0.875(1979) | 0.864(142627) | -0.056 | 0.055 |
|---|------|--------|-------------|---------------|--------|-------|

PGC\_SCZ wave3 (incl. wave2 and replication)

|   |      |          |              |               |       |       |
|---|------|----------|--------------|---------------|-------|-------|
| 1 | 0.96 | 4.12e-08 | 0.864(56502) | 0.865(221015) | -0.07 | 0.013 |
|---|------|----------|--------------|---------------|-------|-------|

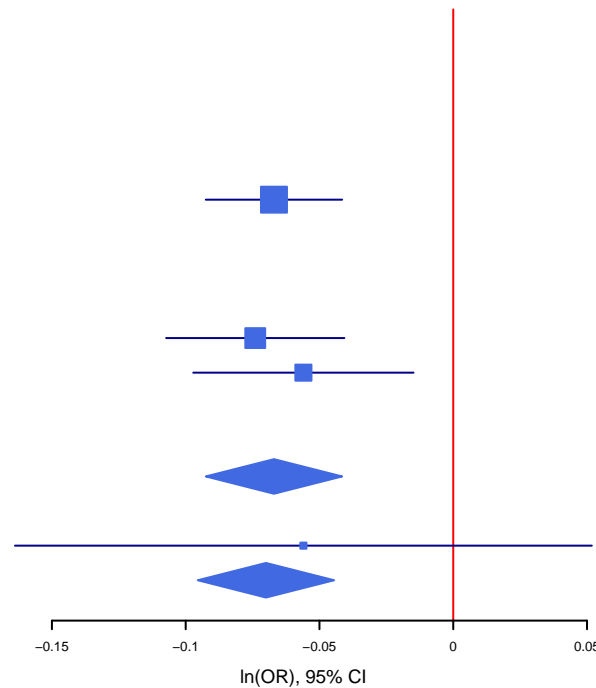

|                                                    |          |             |                 |                     |                      |              |              |
|----------------------------------------------------|----------|-------------|-----------------|---------------------|----------------------|--------------|--------------|
| rs2299409                                          | G/A      |             | 7:103812171     |                     |                      |              |              |
|                                                    | ---      |             | het_P:          |                     | 0.05                 | het_I:       | 73.9         |
|                                                    | ngt      | info        | p_value         | f_ca(n)             | f_co(n)              | ln(OR)       | STDerr       |
| PGC_SCZ wave3 eur only                             | 0        | 1.00        | 6.45e-05        | 0.483(53386)        | 0.474(77258)         | 0.034        | 0.009        |
| PGC_SCZ wave3 asn only                             | 0        | 0.97        | 7.39e-05        | 0.733(14004)        | 0.726(16757)         | 0.077        | 0.02         |
| PGC_SCZ wave2 only                                 | 0        | 1.00        | 0.0134          | 0.494(34850)        | 0.481(44347)         | 0.027        | 0.011        |
| PGC_SCZ wave3 (excl. wave2)                        | 0        | 0.98        | 4.72e-07        | 0.58(32540)         | 0.552(49668)         | 0.058        | 0.012        |
| <b>PGC_SCZ wave3 (incl. wave2)</b>                 | <b>0</b> | <b>0.99</b> | <b>1.46e-07</b> | <b>0.535(67390)</b> | <b>0.519(94015)</b>  | <b>0.041</b> | <b>0.008</b> |
| Decode – Replication                               | 0        | 1.00        | 0.0857          | 0.467(1979)         | 0.449(142627)        | 0.058        | 0.038        |
| <b>PGC_SCZ wave3 (incl. wave2 and replication)</b> | <b>0</b> | <b>1.00</b> | <b>4.22e-08</b> | <b>0.533(69369)</b> | <b>0.477(236642)</b> | <b>0.042</b> | <b>0.008</b> |

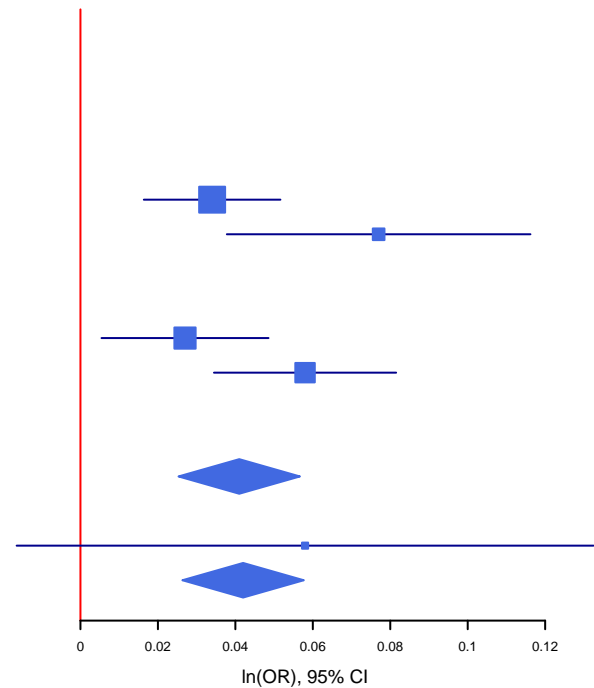

rs61928076

|     |                         |
|-----|-------------------------|
| G/A | 12:53730164             |
| ++  | het_P: 0.461 het_I: 0.0 |

|                                             | ngt | info | p_value  | f_ca(n)      | f_co(n)       | ln(OR) | STDerr |
|---------------------------------------------|-----|------|----------|--------------|---------------|--------|--------|
| PGC_SCZ wave3 eur only                      | 1   | 0.76 | 7.19e-08 | 0.96(52841)  | 0.964(75249)  | -0.14  | 0.026  |
| PGC_SCZ wave3 asn only                      | nan | nan  | nan      | nan(nan)     | nan(nan)      | nan    | nan    |
| PGC_SCZ wave2 only                          | 0   | 0.79 | 5.97e-06 | 0.961(32453) | 0.966(41378)  | -0.151 | 0.033  |
| PGC_SCZ wave3 (excl. wave2)                 | 1   | 0.64 | 0.00473  | 0.964(27055) | 0.965(41865)  | -0.113 | 0.04   |
| PGC_SCZ wave3 (incl. wave2)                 | 1   | 0.71 | 1.25e-07 | 0.962(59508) | 0.966(83243)  | -0.135 | 0.026  |
| Decode - Replication                        | 0   | 1.00 | 0.154    | 0.961(1979)  | 0.946(142627) | -0.113 | 0.093  |
| PGC_SCZ wave3 (incl. wave2 and replication) | 1   | 0.89 | 4.23e-08 | 0.962(61487) | 0.954(225870) | -0.135 | 0.025  |

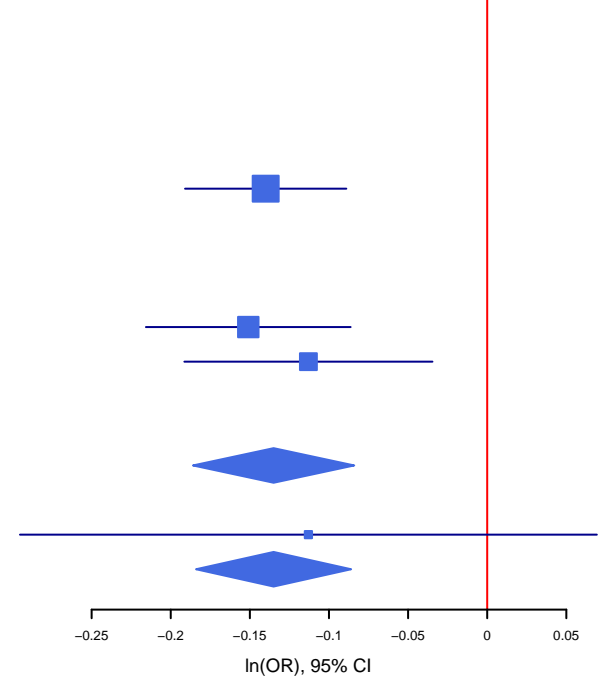

rs17454419

|     |                         |
|-----|-------------------------|
| C/T | 11:57448493             |
| ++  | het_P: 0.796 het_I: 0.0 |

|                        | ngt | info | p_value  | f_ca(n)      | f_co(n)      | ln(OR) | STDerr |
|------------------------|-----|------|----------|--------------|--------------|--------|--------|
| PGC_SCZ wave3 eur only | 1   | 0.93 | 1.01e-06 | 0.962(53386) | 0.966(77258) | -0.118 | 0.024  |
| PGC_SCZ wave3 asn only | nan | nan  | nan      | nan(nan)     | nan(nan)     | nan    | nan    |

|                             |   |      |          |              |              |        |       |
|-----------------------------|---|------|----------|--------------|--------------|--------|-------|
| PGC_SCZ wave2 only          | 1 | 0.91 | 3.03e-05 | 0.962(34850) | 0.965(44347) | -0.127 | 0.03  |
| PGC_SCZ wave3 (excl. wave2) | 0 | 0.87 | 0.00337  | 0.967(23186) | 0.97(38875)  | -0.114 | 0.039 |

PGC\_SCZ wave3 (incl. wave2)

|   |      |          |              |              |        |       |
|---|------|----------|--------------|--------------|--------|-------|
| 1 | 0.89 | 3.54e-07 | 0.964(58036) | 0.968(83222) | -0.122 | 0.024 |
|---|------|----------|--------------|--------------|--------|-------|

|                                             |   |      |          |              |               |        |       |
|---------------------------------------------|---|------|----------|--------------|---------------|--------|-------|
| Decode – Replication                        | 0 | 1.00 | 0.0205   | 0.971(1979)  | 0.974(142627) | -0.114 | 0.105 |
| PGC_SCZ wave3 (incl. wave2 and replication) | 1 | 0.96 | 4.29e-08 | 0.964(60015) | 0.972(225849) | -0.128 | 0.023 |

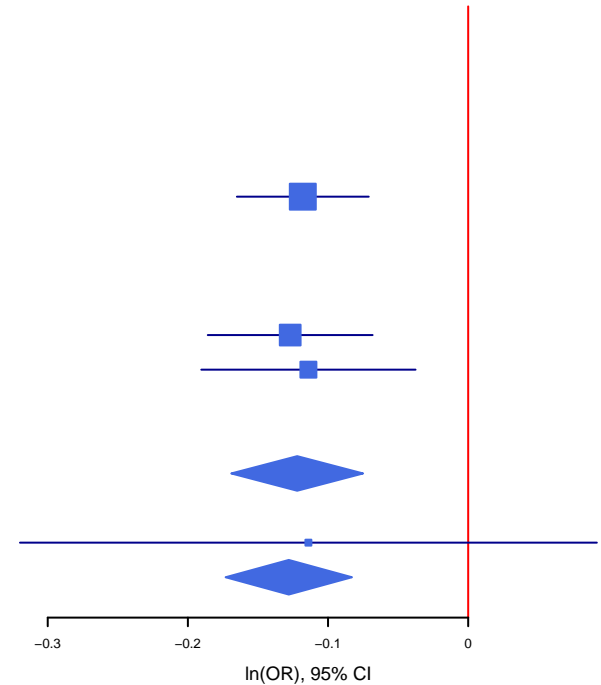

| rs36029218                                         | A/T      |             | 11:27648371     |                     |                      |              |              |
|----------------------------------------------------|----------|-------------|-----------------|---------------------|----------------------|--------------|--------------|
|                                                    | ++       |             | het_P:          | 0.391               | het_I:               | 0.0          |              |
|                                                    | ngt      | info        | p_value         | f_ca(n)             | f_co(n)              | ln(OR)       | STDerr       |
| PGC_SCZ wave3 eur only                             | 0        | 1.00        | 4.14e-06        | 0.801(53386)        | 0.792(77258)         | 0.049        | 0.011        |
| PGC_SCZ wave3 asn only                             | 0        | 0.99        | 0.00773         | 0.57(14004)         | 0.553(16757)         | 0.046        | 0.017        |
| PGC_SCZ wave2 only                                 | 0        | 1.00        | 0.00283         | 0.791(34850)        | 0.789(44347)         | 0.04         | 0.013        |
| PGC_SCZ wave3 (excl. wave2)                        | 0        | 0.99        | 7.42e-06        | 0.712(32540)        | 0.714(49668)         | 0.055        | 0.012        |
| <b>PGC_SCZ wave3 (incl. wave2)</b>                 | <b>0</b> | <b>1.00</b> | <b>1.06e-07</b> | <b>0.753(67390)</b> | <b>0.749(94015)</b>  | <b>0.048</b> | <b>0.009</b> |
| Decode – Replication                               | 0        | 1.00        | 0.134           | 0.811(1979)         | 0.842(142627)        | 0.055        | 0.05         |
| <b>PGC_SCZ wave3 (incl. wave2 and replication)</b> | <b>0</b> | <b>1.00</b> | <b>4.29e-08</b> | <b>0.755(69369)</b> | <b>0.805(236642)</b> | <b>0.049</b> | <b>0.009</b> |

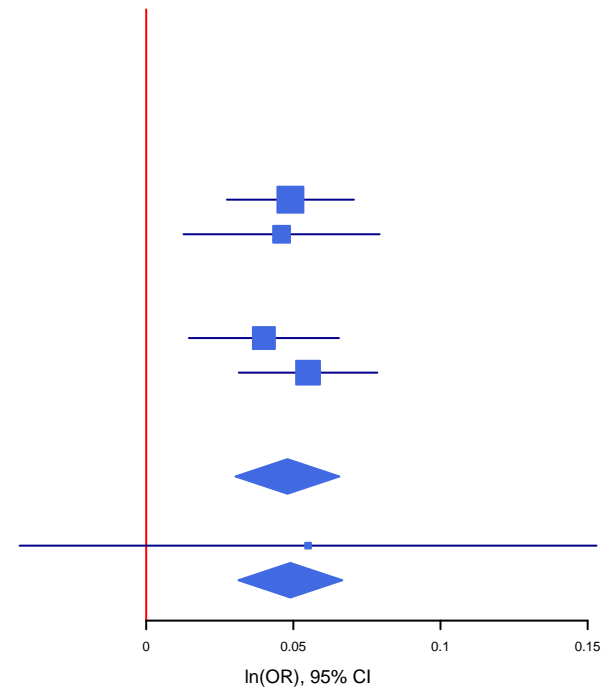



rs605765

C/T

11:30217503

++

het\_P:

0.451

het\_I:

0.0

ngt info p\_value f\_ca(n) f\_co(n) ln(OR) STDerr

PGC\_SCZ wave3 eur only

43 0.99 1.16e-06 0.38(53386) 0.389(77258) -0.043 0.009

PGC\_SCZ wave3 asn only

9 0.93 0.264 0.14(14004) 0.139(16757) -0.029 0.026

PGC\_SCZ wave2 only

37 1.00 0.00132 0.369(34850) 0.385(44347) -0.036 0.011

PGC\_SCZ wave3 (excl. wave2)

15 0.96 0.000115 0.289(32540) 0.308(49668) -0.049 0.013

PGC\_SCZ wave3 (incl. wave2)

52 0.98 7e-07 0.33(67390) 0.344(94015) -0.042 0.008

Decode - Replication

0 1.00 0.00246 0.396(1979) 0.351(142627) -0.049 0.04

PGC\_SCZ wave3 (incl. wave2 and replication)

52 0.99 4.38e-08 0.332(69369) 0.348(236642) -0.045 0.008

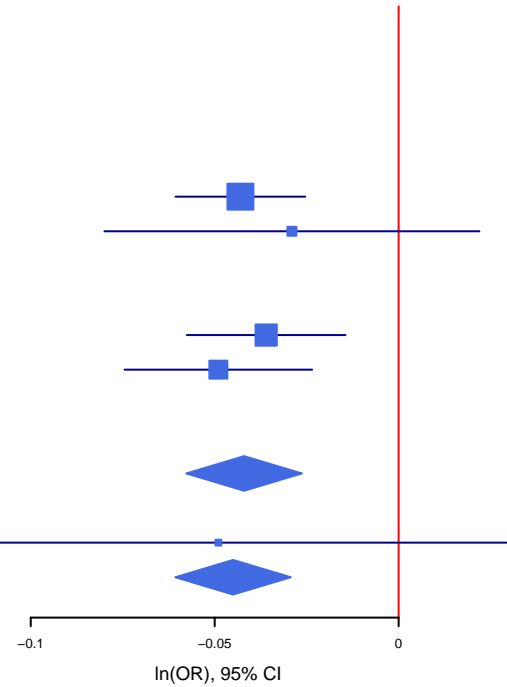

rs7378757

A/G

5:63726936

—

het\_P:

0.31

het\_I:

3.1

|  | ngt | info | p_value | f_ca(n) | f_co(n) | ln(OR) | STDerr |
|--|-----|------|---------|---------|---------|--------|--------|
|--|-----|------|---------|---------|---------|--------|--------|

PGC\_SCZ wave3 eur only

|   |      |          |              |              |        |       |
|---|------|----------|--------------|--------------|--------|-------|
| 0 | 1.00 | 1.03e-05 | 0.377(53386) | 0.384(77258) | -0.039 | 0.009 |
|---|------|----------|--------------|--------------|--------|-------|

PGC\_SCZ wave3 asn only

|   |      |         |              |              |       |       |
|---|------|---------|--------------|--------------|-------|-------|
| 0 | 0.98 | 0.00389 | 0.214(14004) | 0.226(16757) | -0.06 | 0.021 |
|---|------|---------|--------------|--------------|-------|-------|

PGC\_SCZ wave2 only

|   |      |         |              |              |       |       |
|---|------|---------|--------------|--------------|-------|-------|
| 0 | 1.00 | 7.7e-06 | 0.365(34850) | 0.377(44347) | -0.05 | 0.011 |
|---|------|---------|--------------|--------------|-------|-------|

PGC\_SCZ wave3 (excl. wave2)

|   |      |         |             |              |        |       |
|---|------|---------|-------------|--------------|--------|-------|
| 0 | 0.99 | 0.00479 | 0.32(32540) | 0.337(49668) | -0.034 | 0.012 |
|---|------|---------|-------------|--------------|--------|-------|

**PGC\_SCZ wave3 (incl. wave2)**

|          |             |                 |                     |                     |               |              |
|----------|-------------|-----------------|---------------------|---------------------|---------------|--------------|
| <b>0</b> | <b>1.00</b> | <b>2.11e-07</b> | <b>0.343(67390)</b> | <b>0.356(94015)</b> | <b>-0.042</b> | <b>0.008</b> |
|----------|-------------|-----------------|---------------------|---------------------|---------------|--------------|

Decode – Replication

|   |      |       |             |              |        |      |
|---|------|-------|-------------|--------------|--------|------|
| 0 | 1.00 | 0.074 | 0.369(1979) | 0.36(142627) | -0.034 | 0.04 |
|---|------|-------|-------------|--------------|--------|------|

**PGC\_SCZ wave3 (incl. wave2 and replication)**

|          |             |                 |                     |                      |               |              |
|----------|-------------|-----------------|---------------------|----------------------|---------------|--------------|
| <b>0</b> | <b>1.00</b> | <b>4.39e-08</b> | <b>0.344(69369)</b> | <b>0.359(236642)</b> | <b>-0.043</b> | <b>0.008</b> |
|----------|-------------|-----------------|---------------------|----------------------|---------------|--------------|

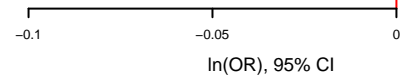

|                                                    |           |             |                 |                     |                      |              |              |
|----------------------------------------------------|-----------|-------------|-----------------|---------------------|----------------------|--------------|--------------|
| rs11854073                                         | G/A       |             | 15:58972995     |                     |                      |              |              |
|                                                    | --        |             | het_P:          | 0.766               | het_I:               | 0.0          |              |
|                                                    | ngt       | info        | p_value         | f_ca(n)             | f_co(n)              | ln(OR)       | STDerr       |
| PGC_SCZ wave3 eur only                             | 50        | 1.00        | 4.89e-07        | 0.685(53386)        | 0.673(77258)         | 0.047        | 0.009        |
| PGC_SCZ wave3 asn only                             | 6         | 0.92        | 0.0708          | 0.227(14004)        | 0.216(16757)         | 0.04         | 0.022        |
| PGC_SCZ wave2 only                                 | 17        | 1.00        | 0.000216        | 0.655(34850)        | 0.658(44347)         | 0.043        | 0.012        |
| PGC_SCZ wave3 (excl. wave2)                        | 39        | 0.97        | 0.000114        | 0.52(32540)         | 0.532(49668)         | 0.048        | 0.012        |
| <b>PGC_SCZ wave3 (incl. wave2)</b>                 | <b>56</b> | <b>0.98</b> | <b>9.45e-08</b> | <b>0.59(67390)</b>  | <b>0.592(94015)</b>  | <b>0.045</b> | <b>0.008</b> |
| Decode – Replication                               | 0         | 1.00        | 0.252           | 0.68(1979)          | 0.682(142627)        | 0.048        | 0.04         |
| <b>PGC_SCZ wave3 (incl. wave2 and replication)</b> | <b>56</b> | <b>0.99</b> | <b>4.41e-08</b> | <b>0.593(69369)</b> | <b>0.646(236642)</b> | <b>0.045</b> | <b>0.008</b> |

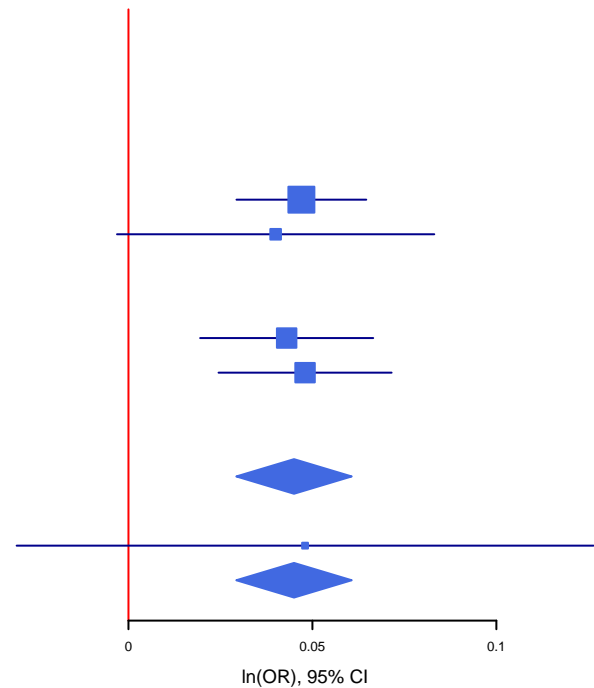

| rs7099380                                          | G/A       |             | 10:18549016     |                     |                      |               | n            |
|----------------------------------------------------|-----------|-------------|-----------------|---------------------|----------------------|---------------|--------------|
|                                                    | ++        |             | het_P:          |                     | 0.448                | het_I:        |              |
|                                                    |           |             |                 |                     |                      | 0.0           |              |
|                                                    | ngt       | info        | p_value         | f_ca(n)             | f_co(n)              | ln(OR)        | STDerr       |
| PGC_SCZ wave3 eur only                             | 70        | 1.00        | 1.82e-09        | 0.442(53386)        | 0.452(77258)         | -0.052        | 0.009        |
| PGC_SCZ wave3 asn only                             | 10        | 0.96        | 0.776           | 0.302(14004)        | 0.295(16757)         | -0.005        | 0.019        |
| PGC_SCZ wave2 only                                 | 33        | 1.00        | 5.55e-06        | 0.431(34850)        | 0.445(44347)         | -0.05         | 0.011        |
| PGC_SCZ wave3 (excl. wave2)                        | 47        | 0.99        | 0.000847        | 0.393(32540)        | 0.405(49668)         | -0.038        | 0.011        |
| <b>PGC_SCZ wave3 (incl. wave2)</b>                 | <b>80</b> | <b>0.99</b> | <b>2.33e-08</b> | <b>0.413(67390)</b> | <b>0.424(94015)</b>  | <b>-0.044</b> | <b>0.008</b> |
| Decode – Replication                               | 0         | 1.00        | 0.901           | 0.45(1979)          | 0.455(142627)        | -0.038        | 0.037        |
| <b>PGC_SCZ wave3 (incl. wave2 and replication)</b> | <b>80</b> | <b>1.00</b> | <b>4.43e-08</b> | <b>0.414(69369)</b> | <b>0.443(236642)</b> | <b>-0.042</b> | <b>0.008</b> |

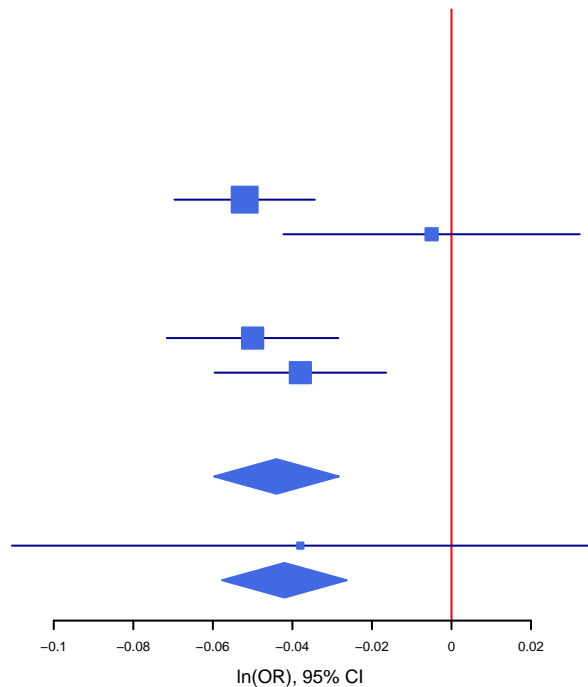

rs76462269

|     |                         |
|-----|-------------------------|
| T/C | 22:42680201             |
| ++  | het_P: 0.393 het_I: 0.0 |

|                                             | ngt | info | p_value  | f_ca(n)      | f_co(n)       | ln(OR) | STDerr |
|---------------------------------------------|-----|------|----------|--------------|---------------|--------|--------|
| PGC_SCZ wave3 eur only                      | 1   | 0.96 | 7.88e-08 | 0.895(53386) | 0.891(77258)  | 0.077  | 0.014  |
| PGC_SCZ wave3 asn only                      | 1   | 0.85 | 0.648    | 0.973(14004) | 0.972(16757)  | 0.026  | 0.057  |
| PGC_SCZ wave2 only                          | 0   | 0.96 | 3.85e-06 | 0.9(34850)   | 0.891(44347)  | 0.084  | 0.018  |
| PGC_SCZ wave3 (excl. wave2)                 | 2   | 0.91 | 0.00555  | 0.924(32540) | 0.918(49668)  | 0.06   | 0.022  |
| PGC_SCZ wave3 (incl. wave2)                 | 2   | 0.94 | 1.04e-07 | 0.912(67390) | 0.905(94015)  | 0.074  | 0.014  |
| Decode – Replication                        | 0   | 1.00 | 0.215    | 0.911(1979)  | 0.926(142627) | 0.06   | 0.07   |
| PGC_SCZ wave3 (incl. wave2 and replication) | 2   | 0.97 | 4.43e-08 | 0.912(69369) | 0.918(236642) | 0.074  | 0.014  |

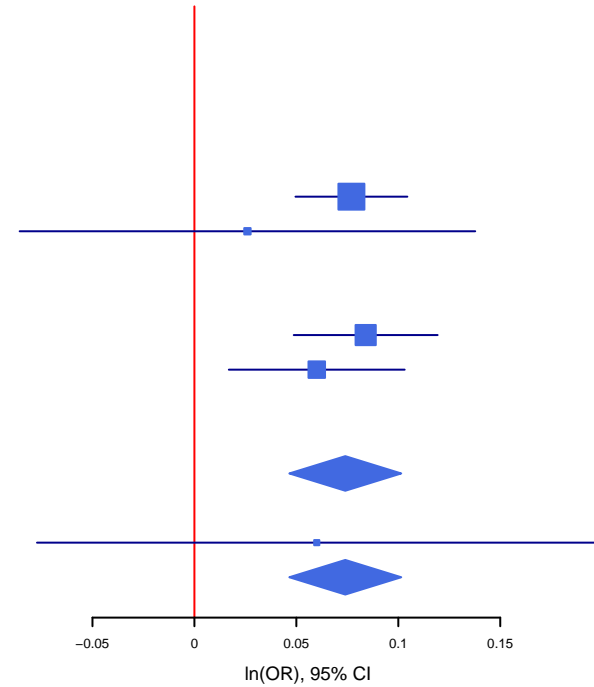

rs13219424

C/T

6:128332084

--

het\_P:

0.92

het\_I:

0.0

|  | ngt | info | p_value | f_ca(n) | f_co(n) | ln(OR) | STDerr |
|--|-----|------|---------|---------|---------|--------|--------|
|--|-----|------|---------|---------|---------|--------|--------|

PGC\_SCZ wave3 eur only

|   |      |          |              |              |       |      |
|---|------|----------|--------------|--------------|-------|------|
| 1 | 0.96 | 5.64e-06 | 0.694(53386) | 0.683(77258) | 0.043 | 0.01 |
|---|------|----------|--------------|--------------|-------|------|

PGC\_SCZ wave3 asn only

|   |      |         |              |              |       |       |
|---|------|---------|--------------|--------------|-------|-------|
| 3 | 0.90 | 0.00176 | 0.617(14004) | 0.606(16757) | 0.057 | 0.018 |
|---|------|---------|--------------|--------------|-------|-------|

PGC\_SCZ wave2 only

|   |      |          |              |              |       |       |
|---|------|----------|--------------|--------------|-------|-------|
| 2 | 0.97 | 7.31e-05 | 0.685(34850) | 0.675(44347) | 0.047 | 0.012 |
|---|------|----------|--------------|--------------|-------|-------|

PGC\_SCZ wave3 (excl. wave2)

|   |      |          |             |              |       |       |
|---|------|----------|-------------|--------------|-------|-------|
| 2 | 0.94 | 0.000165 | 0.67(32540) | 0.664(49668) | 0.045 | 0.012 |
|---|------|----------|-------------|--------------|-------|-------|

**PGC\_SCZ wave3 (incl. wave2)**

|          |             |                 |                     |                     |              |              |
|----------|-------------|-----------------|---------------------|---------------------|--------------|--------------|
| <b>4</b> | <b>0.95</b> | <b>4.52e-08</b> | <b>0.678(67390)</b> | <b>0.669(94015)</b> | <b>0.046</b> | <b>0.008</b> |
|----------|-------------|-----------------|---------------------|---------------------|--------------|--------------|

Decode - Replication

|   |      |     |             |               |       |       |
|---|------|-----|-------------|---------------|-------|-------|
| 0 | 1.00 | 0.6 | 0.684(1979) | 0.679(142627) | 0.045 | 0.041 |
|---|------|-----|-------------|---------------|-------|-------|

**PGC\_SCZ wave3 (incl. wave2 and replication)**

|          |             |                 |                     |                      |              |              |
|----------|-------------|-----------------|---------------------|----------------------|--------------|--------------|
| <b>4</b> | <b>0.98</b> | <b>4.53e-08</b> | <b>0.678(69369)</b> | <b>0.675(236642)</b> | <b>0.045</b> | <b>0.008</b> |
|----------|-------------|-----------------|---------------------|----------------------|--------------|--------------|

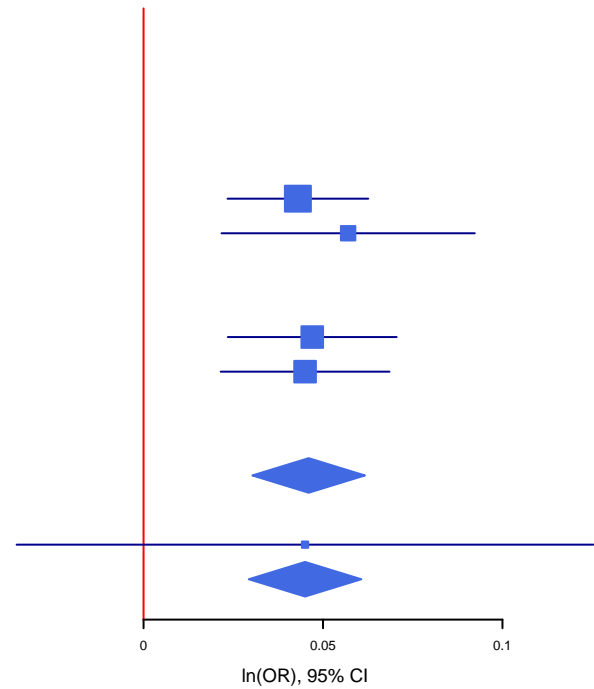

rs80249955

|     |                         |
|-----|-------------------------|
| C/T | 6:69279811              |
| ++  | het_P: 0.602 het_I: 0.0 |

|                                             | ngt | info | p_value  | f_ca(n)      | f_co(n)       | ln(OR) | STDerr |
|---------------------------------------------|-----|------|----------|--------------|---------------|--------|--------|
| PGC_SCZ wave3 eur only                      | 0   | 0.83 | 3.88e-07 | 0.971(53386) | 0.974(77258)  | -0.146 | 0.029  |
| PGC_SCZ wave3 asn only                      | nan | nan  | nan      | nan(nan)     | nan(nan)      | nan    | nan    |
| PGC_SCZ wave2 only                          | 0   | 0.86 | 6.73e-06 | 0.97(32998)  | 0.973(43387)  | -0.162 | 0.036  |
| PGC_SCZ wave3 (excl. wave2)                 | 0   | 0.79 | 0.00487  | 0.972(22087) | 0.974(35570)  | -0.131 | 0.047  |
| PGC_SCZ wave3 (incl. wave2)                 | 0   | 0.83 | 1.26e-07 | 0.971(55085) | 0.974(78957)  | -0.15  | 0.028  |
| Decode – Replication                        | 0   | 0.99 | 0.15     | 0.978(1979)  | 0.977(142627) | -0.131 | 0.13   |
| PGC_SCZ wave3 (incl. wave2 and replication) | 0   | 0.94 | 4.58e-08 | 0.971(57064) | 0.976(221584) | -0.152 | 0.028  |

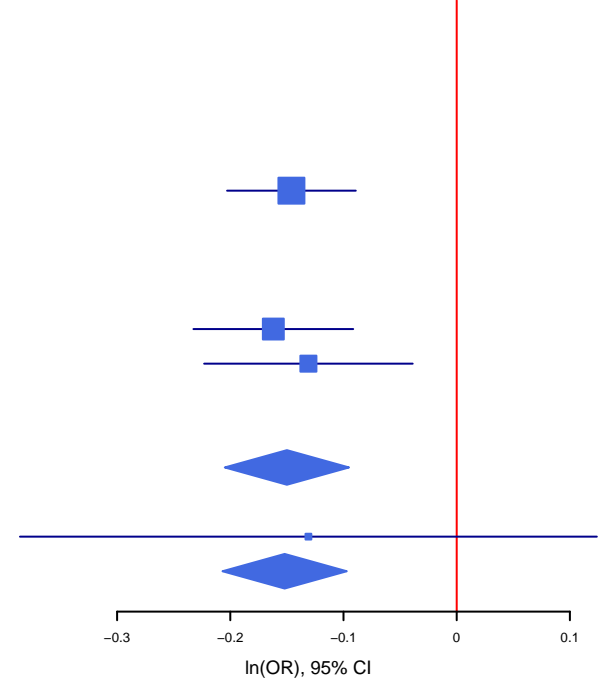

| rs1044569                                          | G/A       |             | 17:12895929     |                     |                      |               |              |
|----------------------------------------------------|-----------|-------------|-----------------|---------------------|----------------------|---------------|--------------|
|                                                    | ++        |             | het_P:          | 0.076               | het_I:               | 68.2          |              |
|                                                    | ngt       | info        | p_value         | f_ca(n)             | f_co(n)              | ln(OR)        | STDerr       |
| PGC_SCZ wave3 eur only                             | 17        | 0.99        | 8.94e-07        | 0.379(53386)        | 0.386(77258)         | -0.044        | 0.009        |
| PGC_SCZ wave3 asn only                             | 4         | 0.97        | 0.0125          | 0.473(14004)        | 0.478(16757)         | -0.043        | 0.017        |
| PGC_SCZ wave2 only                                 | 15        | 1.00        | 2.49e-07        | 0.386(34850)        | 0.394(44347)         | -0.058        | 0.011        |
| PGC_SCZ wave3 (excl. wave2)                        | 6         | 0.98        | 0.00841         | 0.411(32540)        | 0.409(49668)         | -0.029        | 0.011        |
| <b>PGC_SCZ wave3 (incl. wave2)</b>                 | <b>21</b> | <b>0.99</b> | <b>3.54e-08</b> | <b>0.398(67390)</b> | <b>0.402(94015)</b>  | <b>-0.044</b> | <b>0.008</b> |
| Decode – Replication                               | 0         | 1.00        | 0.739           | 0.418(1979)         | 0.425(142627)        | -0.029        | 0.039        |
| <b>PGC_SCZ wave3 (incl. wave2 and replication)</b> | <b>21</b> | <b>0.99</b> | <b>4.72e-08</b> | <b>0.399(69369)</b> | <b>0.416(236642)</b> | <b>-0.042</b> | <b>0.008</b> |

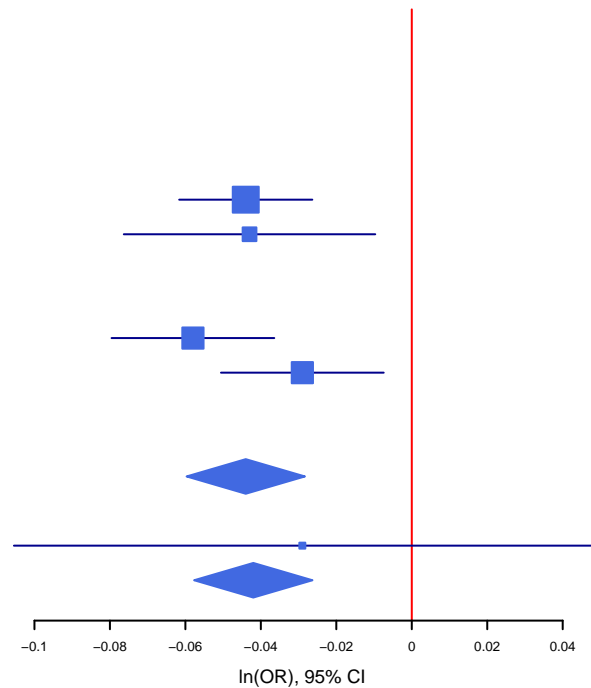



| rs12968622                                         | T/C      |             | 18:52648329     |                     |                      |              |              |
|----------------------------------------------------|----------|-------------|-----------------|---------------------|----------------------|--------------|--------------|
|                                                    | ++       |             | het_P:          | 0.99                | het_I:               | 0.0          |              |
|                                                    | ngt      | info        | p_value         | f_ca(n)             | f_co(n)              | ln(OR)       | STDerr       |
| PGC_SCZ wave3 eur only                             | 1        | 0.84        | 6.44e-08        | 0.963(53386)        | 0.959(77258)         | 0.132        | 0.024        |
| PGC_SCZ wave3 asn only                             | 0        | 0.23        | 0.697           | 0.98(7590)          | 0.979(10569)         | 0.061        | 0.156        |
| PGC_SCZ wave2 only                                 | 0        | 0.84        | 3.79e-05        | 0.964(32998)        | 0.96(43387)          | 0.13         | 0.032        |
| PGC_SCZ wave3 (excl. wave2)                        | 1        | 0.69        | 0.000477        | 0.967(27978)        | 0.963(44440)         | 0.13         | 0.037        |
| <b>PGC_SCZ wave3 (incl. wave2)</b>                 | <b>1</b> | <b>0.77</b> | <b>6.61e-08</b> | <b>0.965(60976)</b> | <b>0.962(87827)</b>  | <b>0.13</b>  | <b>0.024</b> |
| Decode – Replication                               | 0        | 0.99        | 0.387           | 0.958(1979)         | 0.952(142627)        | 0.13         | 0.099        |
| <b>PGC_SCZ wave3 (incl. wave2 and replication)</b> | <b>1</b> | <b>0.91</b> | <b>4.77e-08</b> | <b>0.965(62955)</b> | <b>0.956(230454)</b> | <b>0.127</b> | <b>0.023</b> |

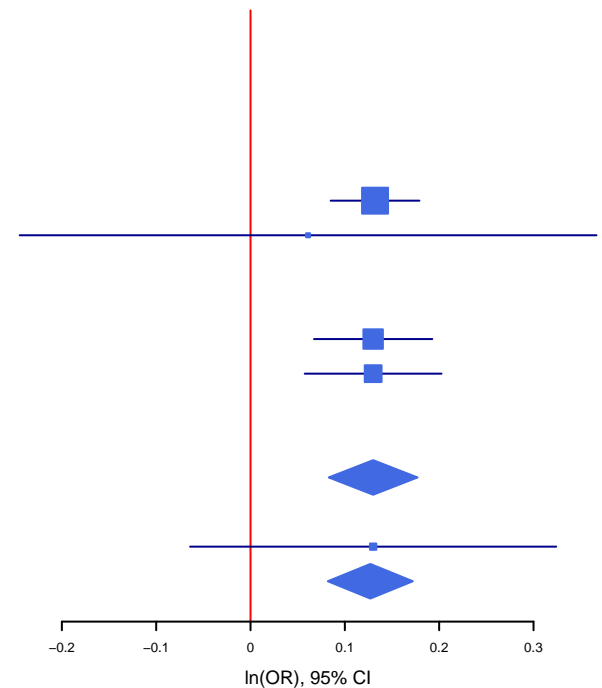

rs12311848

|     |                         |
|-----|-------------------------|
| A/G | 12:124486851            |
| --- | het_P: 0.904 het_I: 0.0 |

|                                             | ngt | info | p_value  | f_ca(n)      | f_co(n)       | ln(OR) | STDerr |
|---------------------------------------------|-----|------|----------|--------------|---------------|--------|--------|
| PGC_SCZ wave3 eur only                      | 6   | 0.99 | 1.31e-08 | 0.65(53386)  | 0.661(77258)  | -0.052 | 0.009  |
| PGC_SCZ wave3 asn only                      | 0   | 0.95 | 0.473    | 0.901(14004) | 0.907(16757)  | -0.021 | 0.03   |
| PGC_SCZ wave2 only                          | 0   | 1.00 | 1.6e-05  | 0.666(34850) | 0.668(44347)  | -0.05  | 0.012  |
| PGC_SCZ wave3 (excl. wave2)                 | 6   | 0.98 | 0.00027  | 0.741(32540) | 0.738(49668)  | -0.048 | 0.013  |
| PGC_SCZ wave3 (incl. wave2)                 | 6   | 0.99 | 1.65e-08 | 0.702(67390) | 0.705(94015)  | -0.049 | 0.009  |
| Decode - Replication                        | 0   | 1.00 | 0.822    | 0.671(1979)  | 0.678(142627) | -0.048 | 0.04   |
| PGC_SCZ wave3 (incl. wave2 and replication) | 6   | 0.99 | 4.8e-08  | 0.701(69369) | 0.689(236642) | -0.046 | 0.008  |

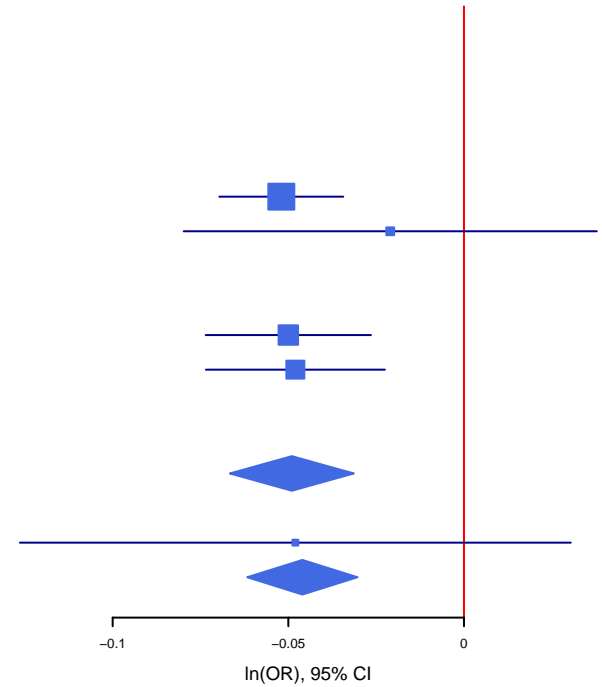

rs76432012

T/C

2:200576767

++

het\_P:

0.532

het\_I:

0.0

ngt info p\_value f\_ca(n) f\_co(n) ln(OR) STDerr

PGC\_SCZ wave3 eur only

29 0.88 5.18e-07 0.946(53386) 0.942(77258) 0.1 0.02

PGC\_SCZ wave3 asn only

0 0.20 0.425 0.988(8500) 0.987(11273) 0.174 0.218

PGC\_SCZ wave2 only

0 0.83 2.03e-05 0.949(34850) 0.943(44347) 0.111 0.026

PGC\_SCZ wave3 (excl. wave2)

29 0.75 0.00482 0.957(27036) 0.952(44184) 0.086 0.031

PGC\_SCZ wave3 (incl. wave2)

29 0.79 3.95e-07 0.952(61886) 0.947(88531) 0.101 0.02

Decode - Replication

0 0.99 0.0207 0.935(1979) 0.941(142627) 0.086 0.084

PGC\_SCZ wave3 (incl. wave2 and replication)

29 0.92 4.84e-08 0.951(63865) 0.944(231158) 0.106 0.019

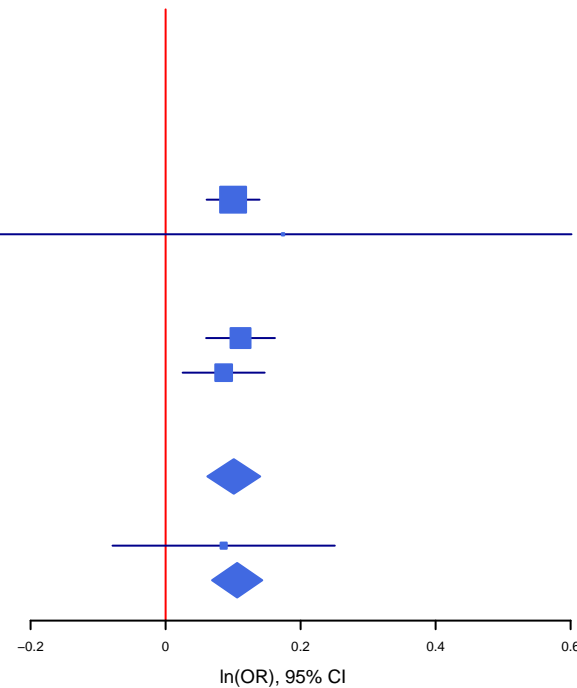

rs34019752

C/A  
8:40281765  
het\_P: 0.492 het\_I: 0.0

|                                             | ngt | info | p_value  | f_ca(n)      | f_co(n)       | ln(OR) | STDerr |
|---------------------------------------------|-----|------|----------|--------------|---------------|--------|--------|
| PGC_SCZ wave3 eur only                      | 0   | 0.98 | 8.66e-06 | 0.893(53386) | 0.887(77258)  | 0.062  | 0.014  |
| PGC_SCZ wave3 asn only                      | 0   | 0.93 | 0.00184  | 0.845(14004) | 0.837(16757)  | 0.075  | 0.024  |
| PGC_SCZ wave2 only                          | 0   | 0.99 | 0.000991 | 0.889(34850) | 0.885(44347)  | 0.057  | 0.017  |
| PGC_SCZ wave3 (excl. wave2)                 | 0   | 0.95 | 1.4e-05  | 0.877(32540) | 0.871(49668)  | 0.073  | 0.017  |
| PGC_SCZ wave3 (incl. wave2)                 | 0   | 0.97 | 6.36e-08 | 0.883(67390) | 0.878(94015)  | 0.065  | 0.012  |
| Decode – Replication                        | 0   | 1.00 | 0.464    | 0.862(1979)  | 0.85(142627)  | 0.073  | 0.055  |
| PGC_SCZ wave3 (incl. wave2 and replication) | 0   | 0.99 | 4.85e-08 | 0.882(69369) | 0.861(236642) | 0.064  | 0.012  |

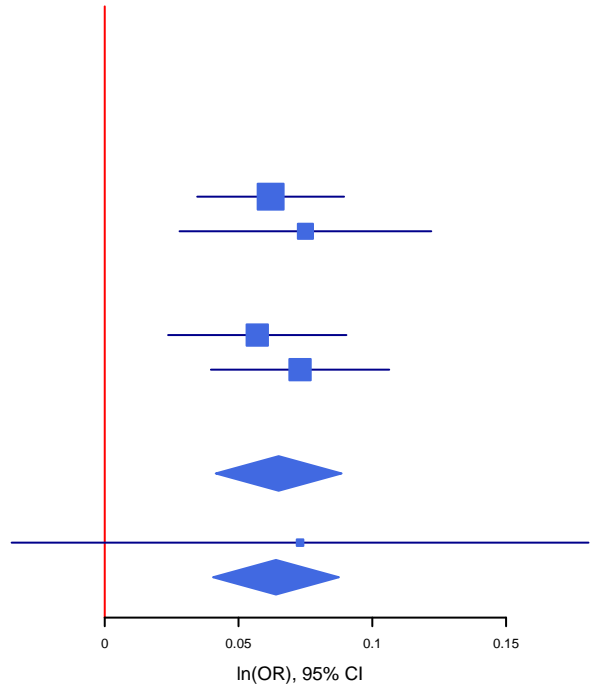

Supplement: Supplementary file [file 2020.09.12.20192922-5.zip]
