# Supplementary material
Source: bioRxiv or medRxiv preprint supplement (http://medrxiv.stage.highwire.org/highwire/filestream/96583/field_highwire_adjunct_files/4/2020.09.12.20192922-5.zip)

# MR Test

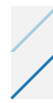

Inverse variance weighted

Maximum likelihood

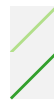

MR Egger

Weighted median

SNP effect on Birth weight || id:ieu-a-1083

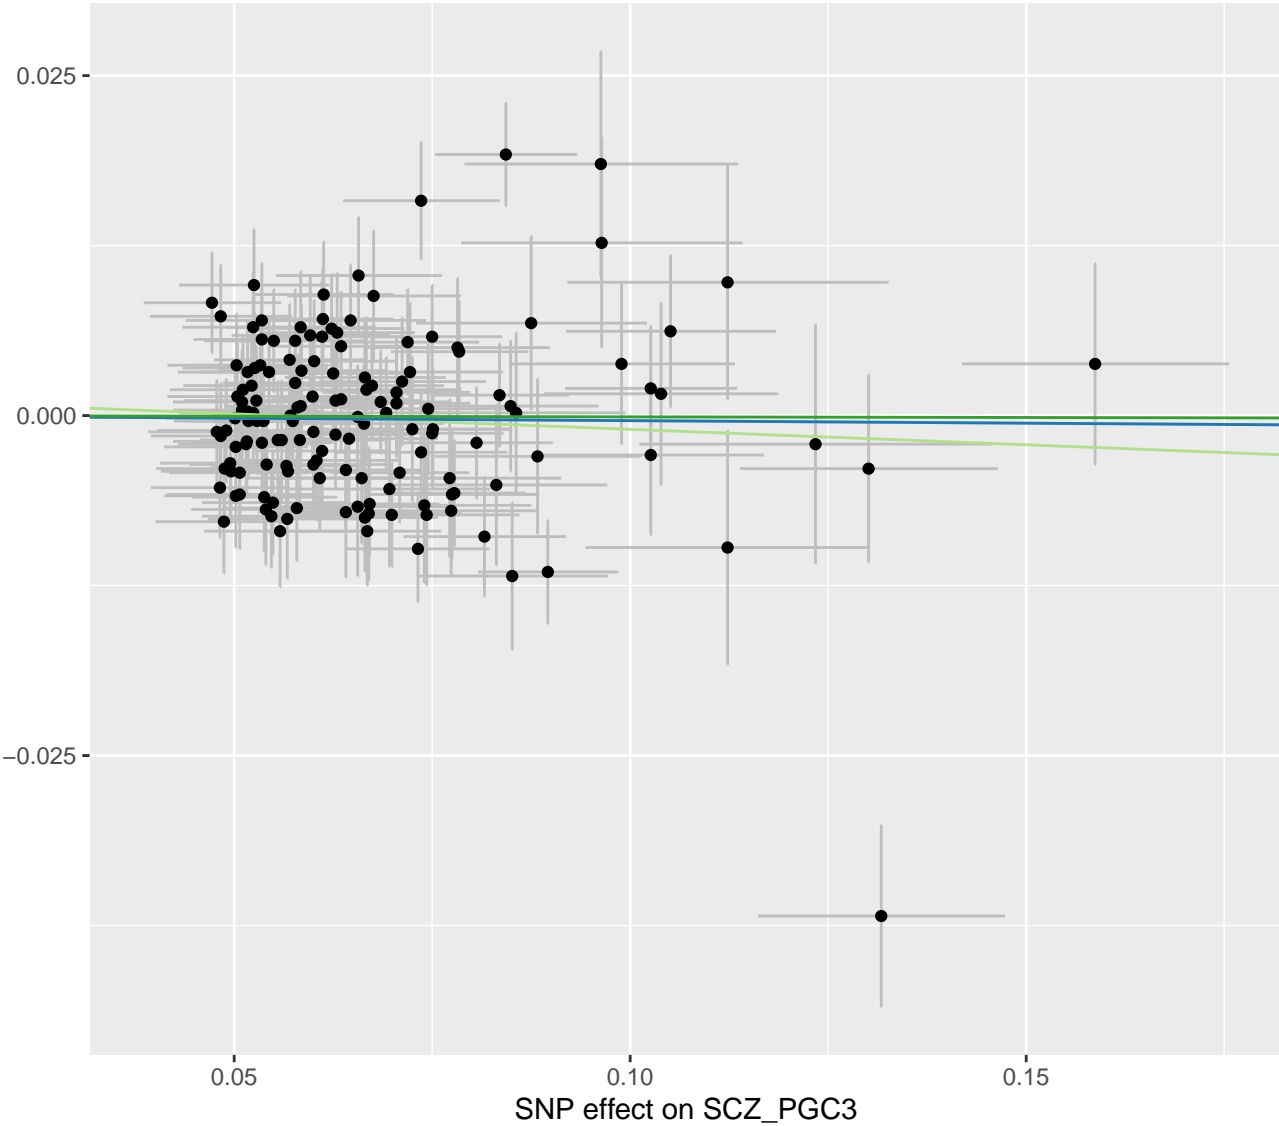

# MR Test

- Inverse variance weighted
- Maximum likelihood
- MR Egger
- Weighted median

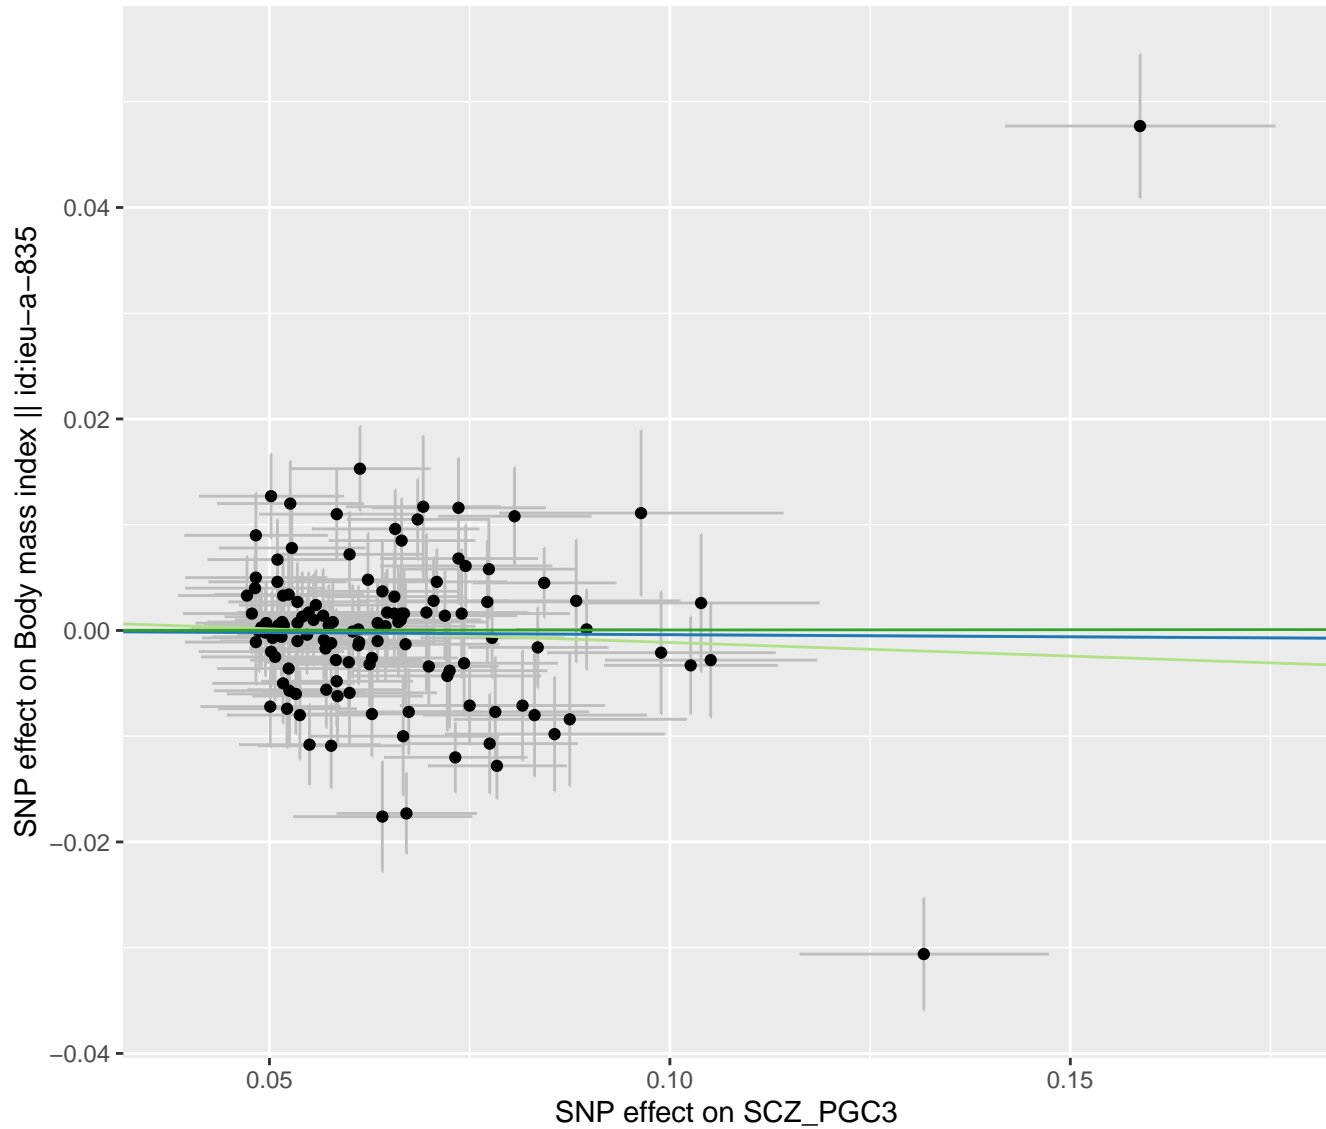

# MR Test

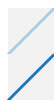

Inverse variance weighted

Maximum likelihood

MR Egger

Weighted median

SNP effect on Extreme height || id:ieu-a-86

0.1

0.0

-0.1

-0.2

0.06

0.09

0.12

0.15

SNP effect on SCZ\_PGC3

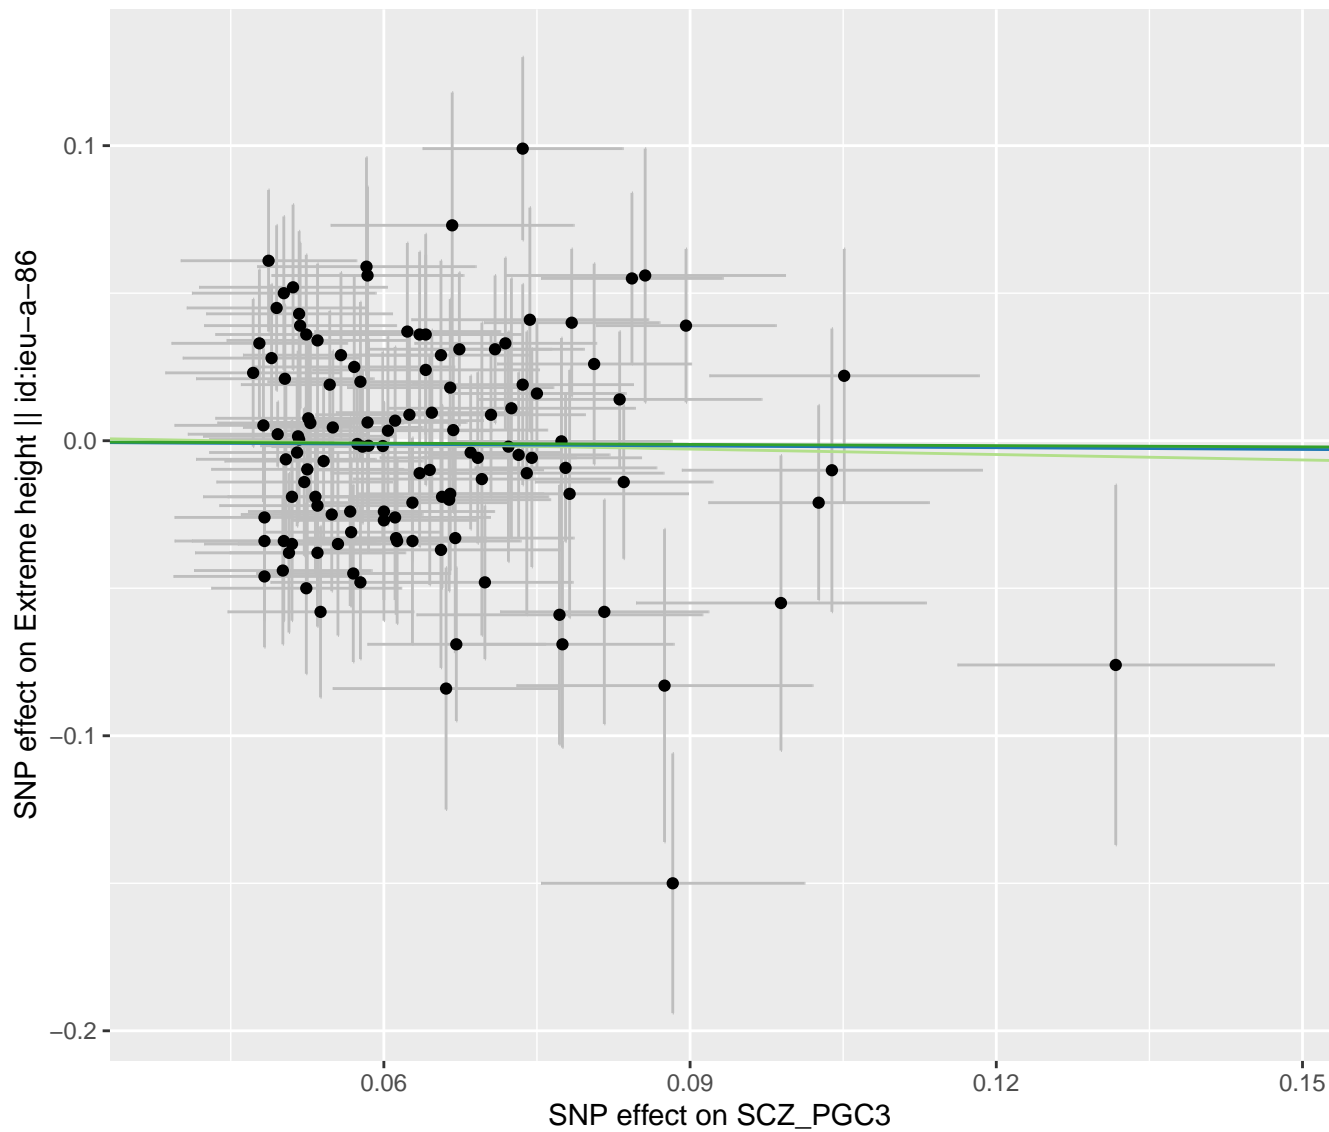

SNP effect on Heart rate increase in response to exercise || id:ebi-a-GCST005845

# MR Test

- Inverse variance weighted
- Maximum likelihood
- MR Egger
- Weighted median

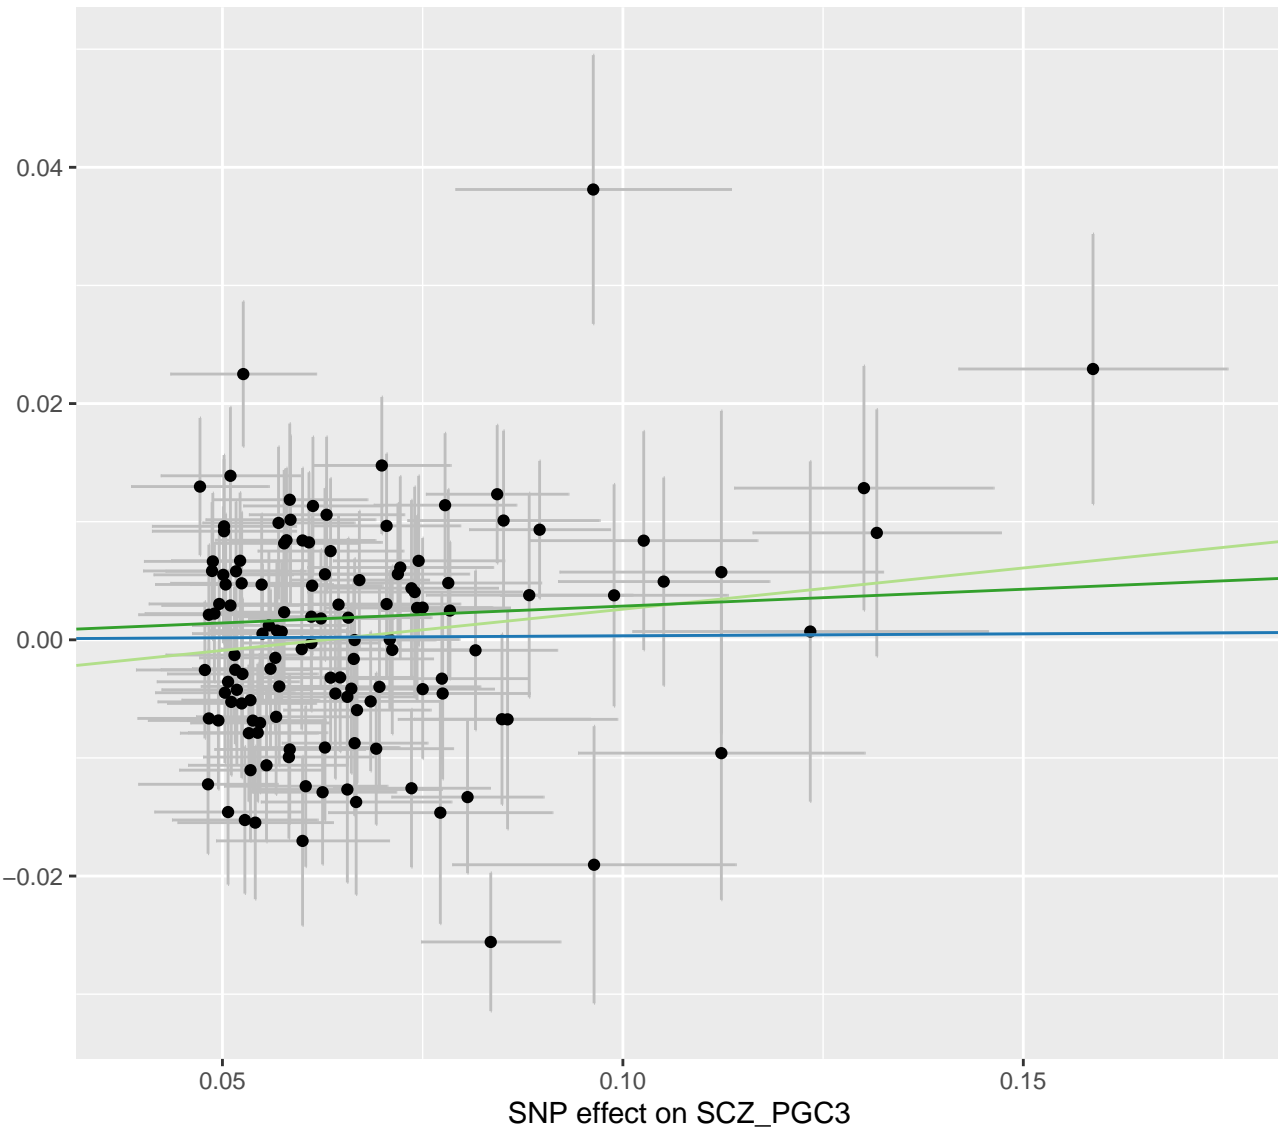

# MR Test

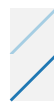

Inverse variance weighted

Maximum likelihood

MR Egger

Weighted median

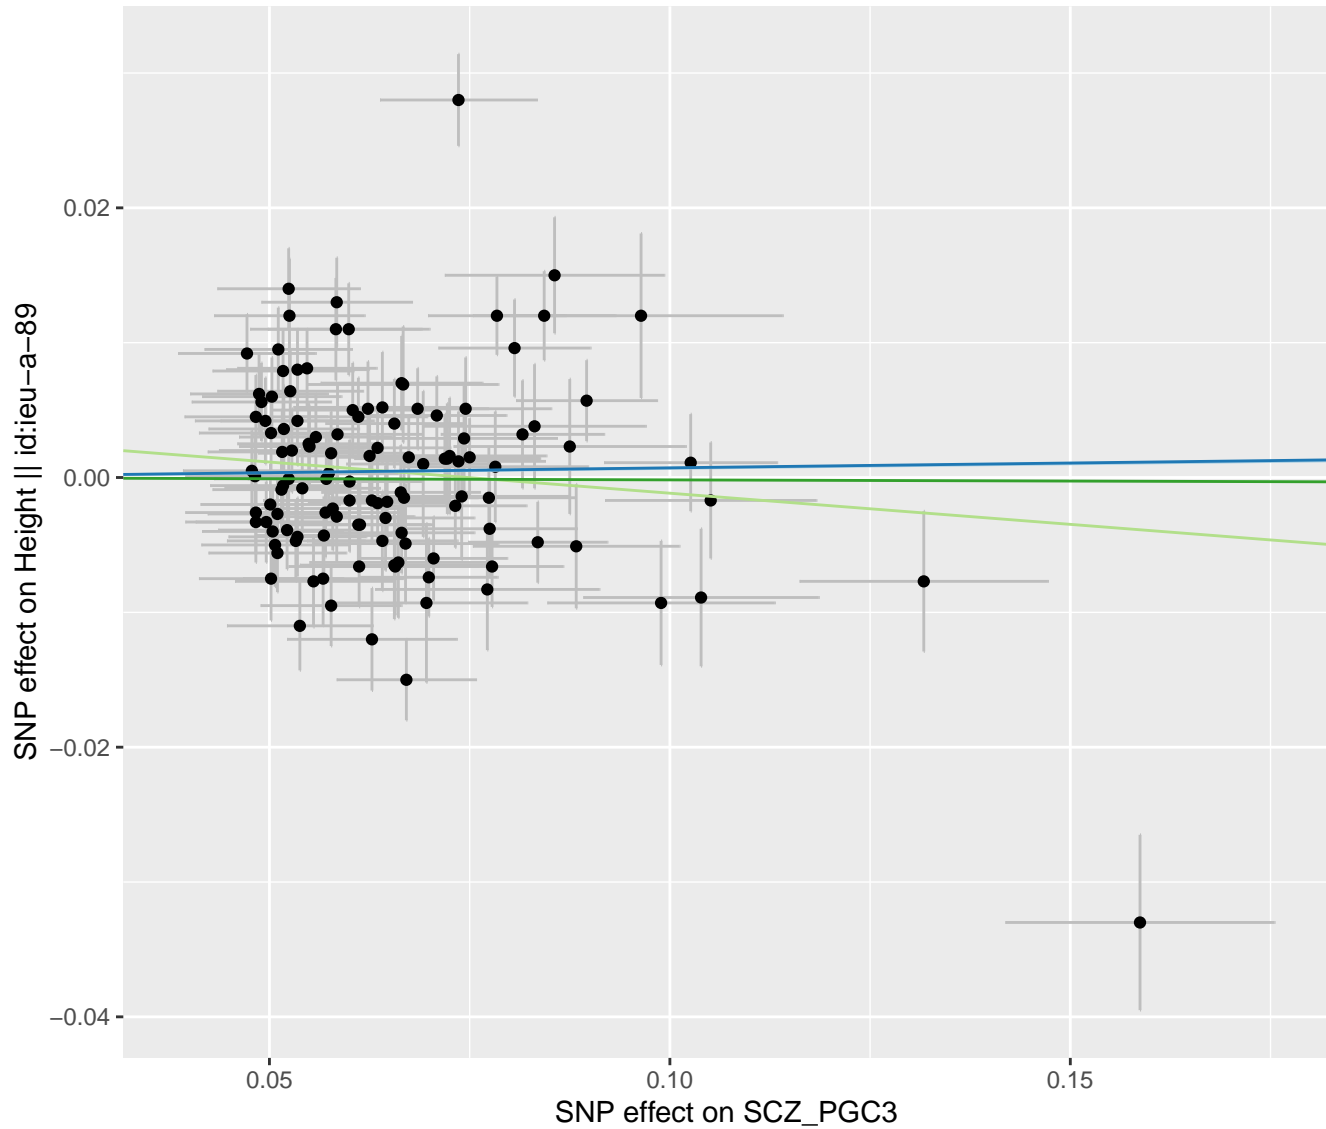

# MR Test

- Inverse variance weighted
- Maximum likelihood
- MR Egger
- Weighted median

SNP effect on Hip circumference || id:ieu-a-49

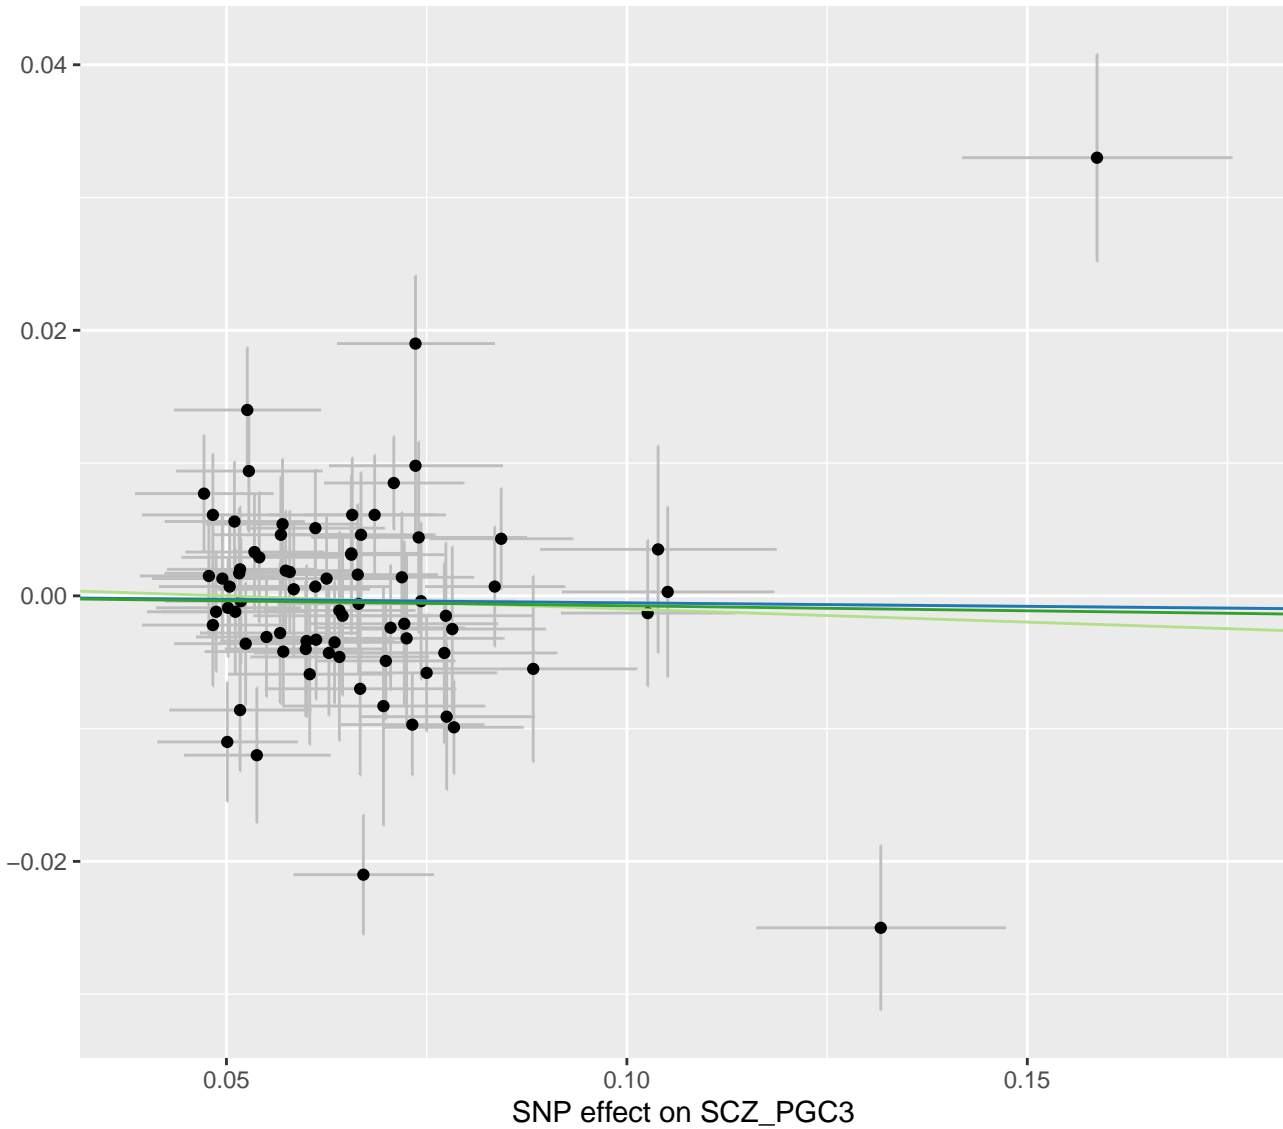

# MR Test

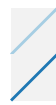

Inverse variance weighted

Maximum likelihood

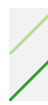

MR Egger

Weighted median

SNP effect on Obesity class 1 || id:ieu-a-90

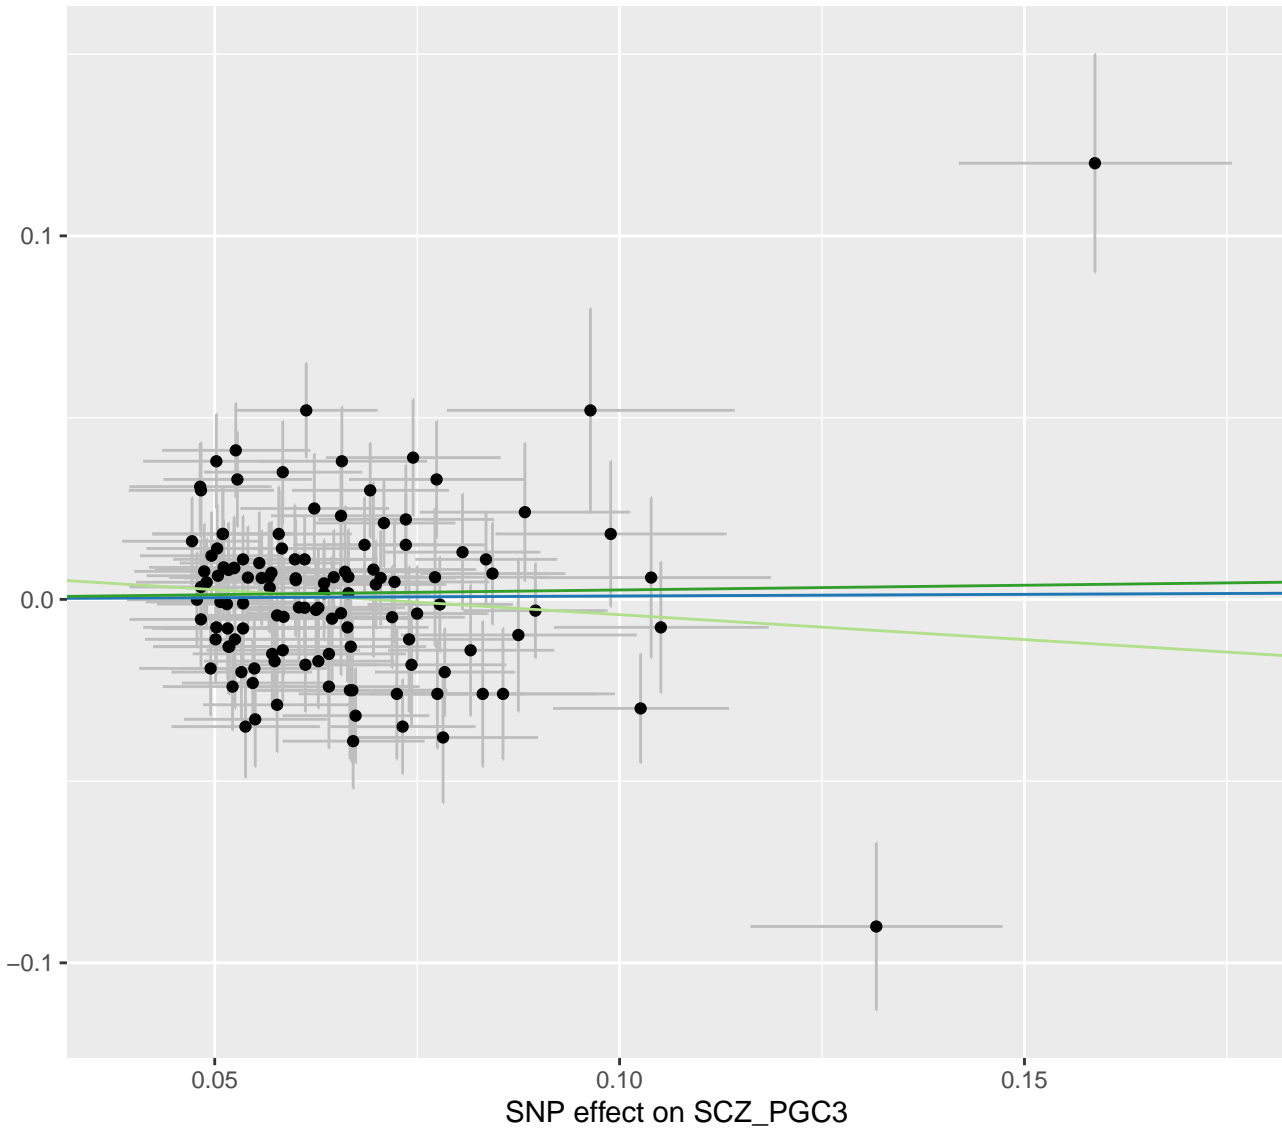

# MR Test

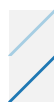

Inverse variance weighted

Maximum likelihood

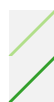

MR Egger

Weighted median

SNP effect on Obesity class 2 || id:ieu-a-91

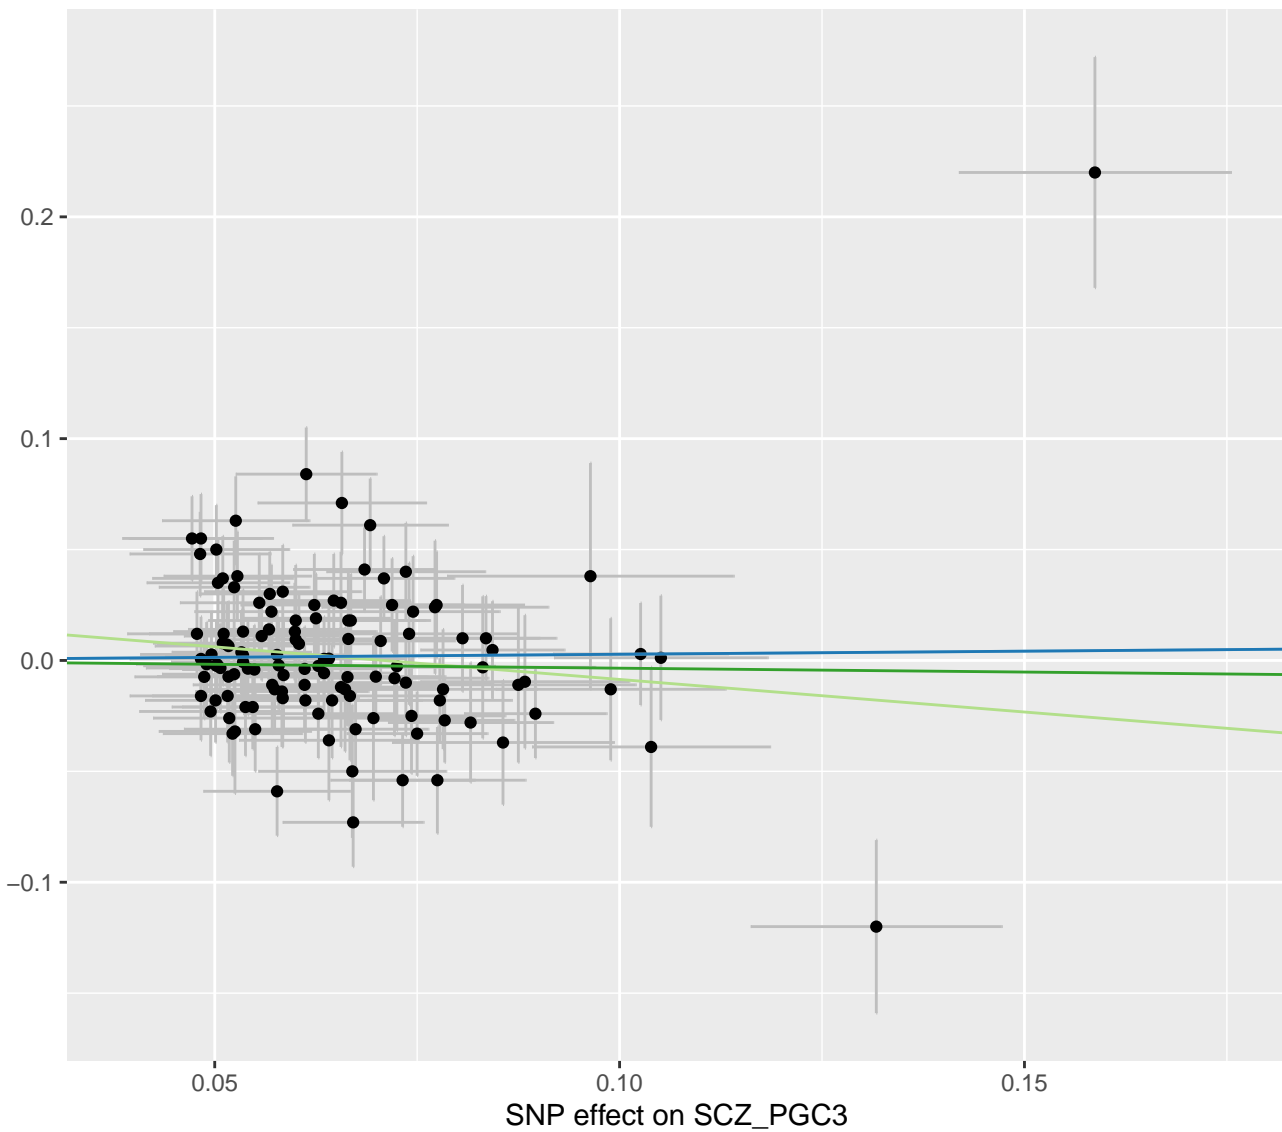



# MR Test

- Inverse variance weighted
- Maximum likelihood
- MR Egger
- Weighted median

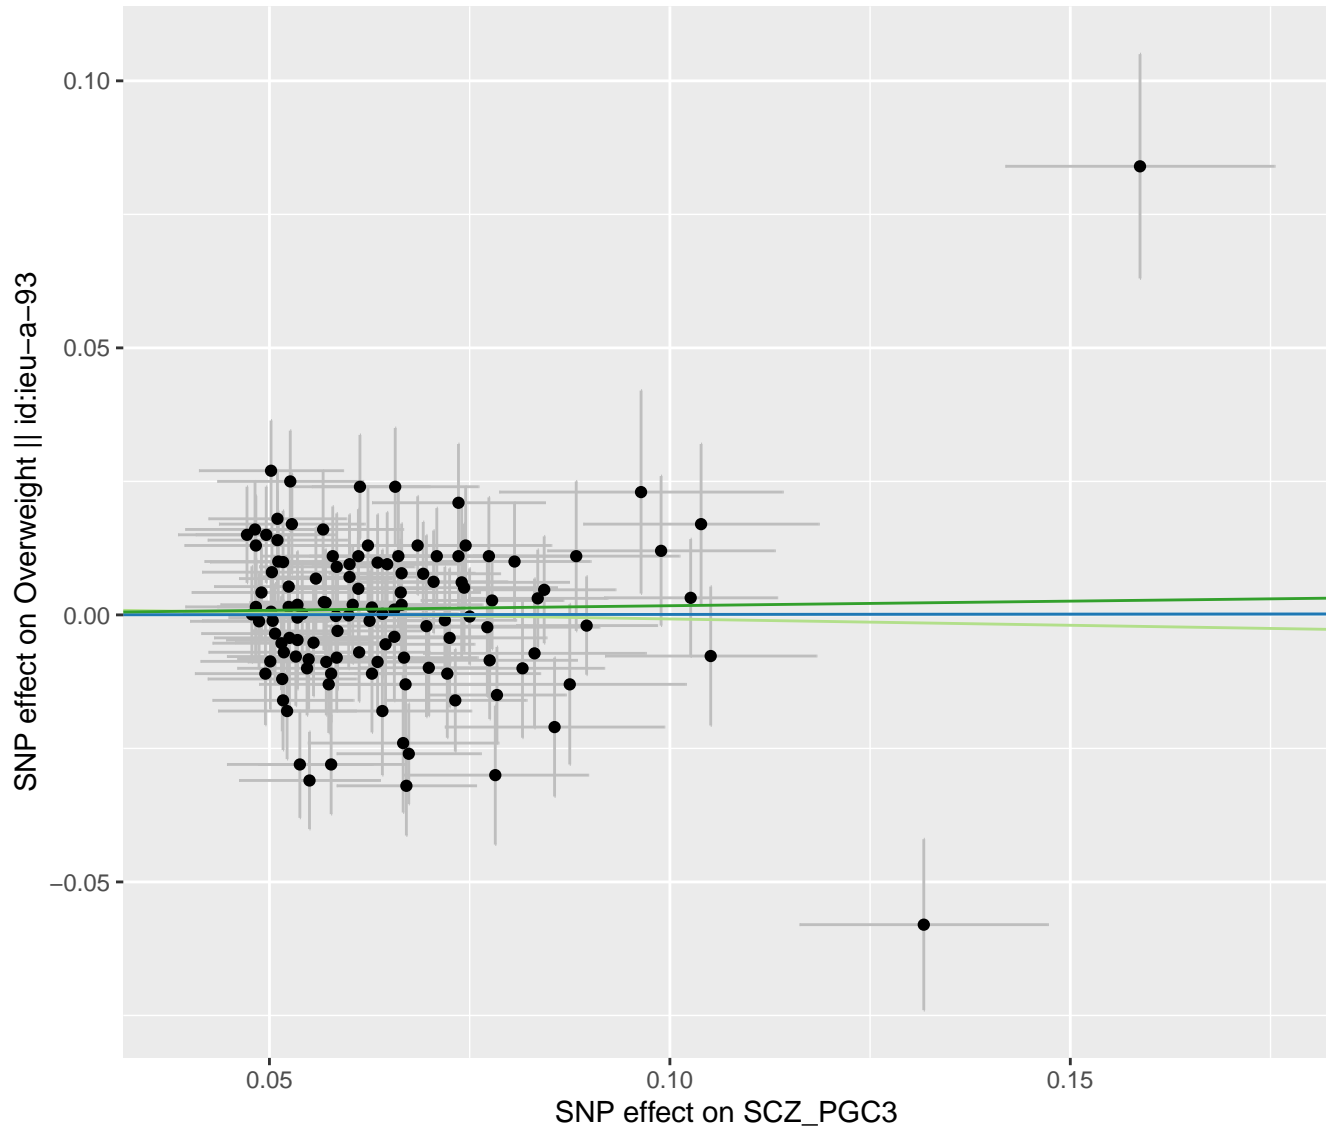

SNP effect on Parental longevity (father's attained age) || id:ebi-a-GCST0006701

# MR Test

- Inverse variance weighted
- Maximum likelihood
- MR Egger
- Weighted median

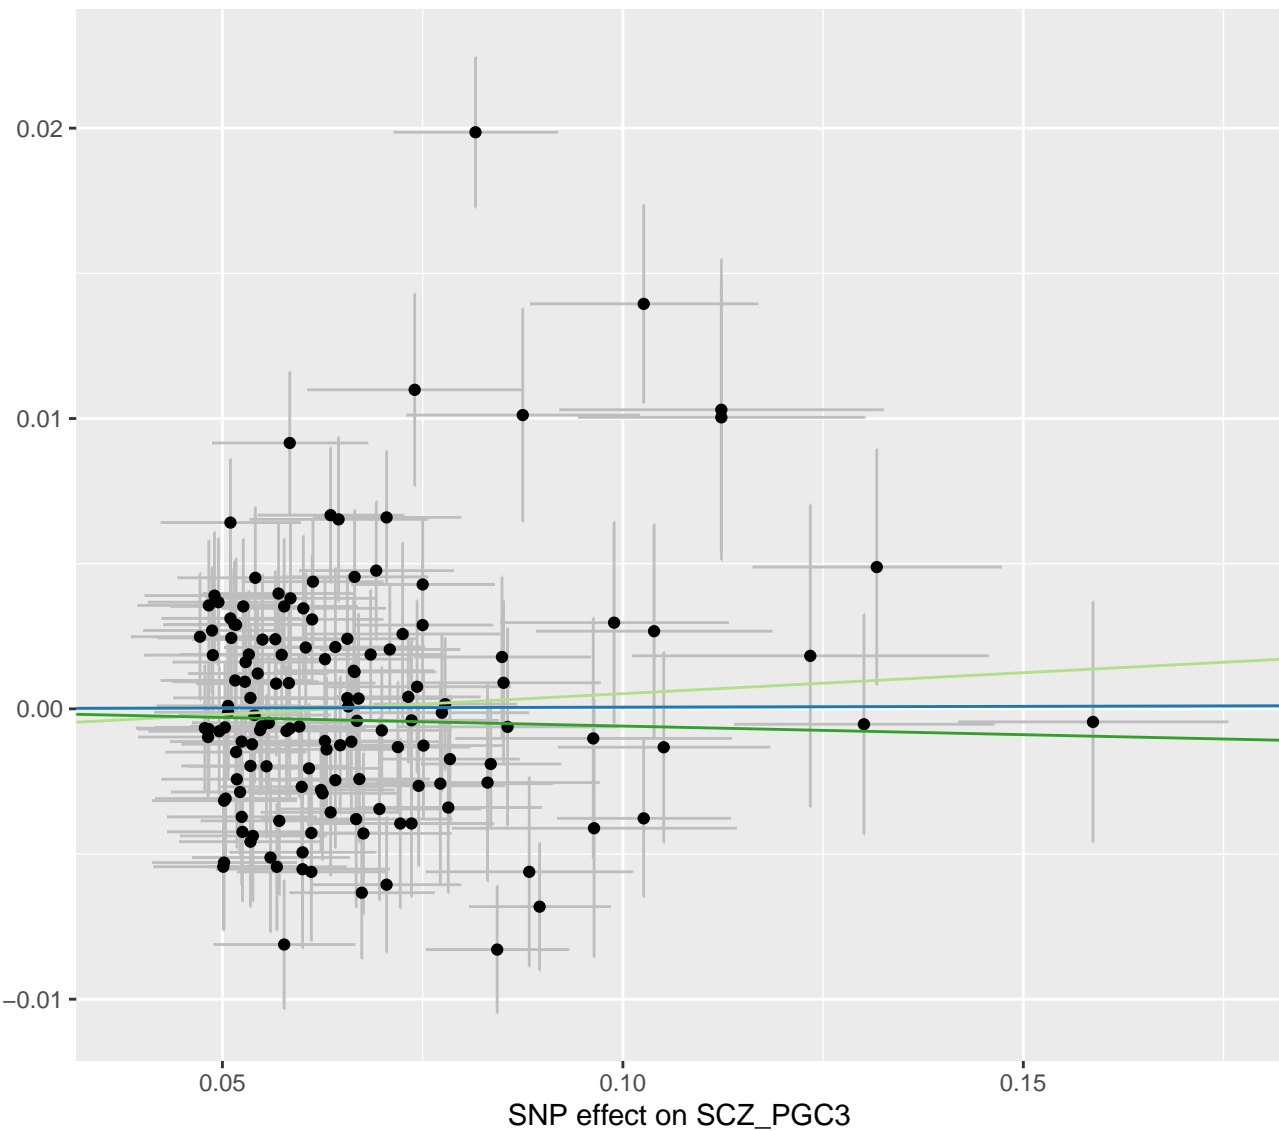

# MR Test

- Inverse variance weighted
- Maximum likelihood
- MR Egger
- Weighted median

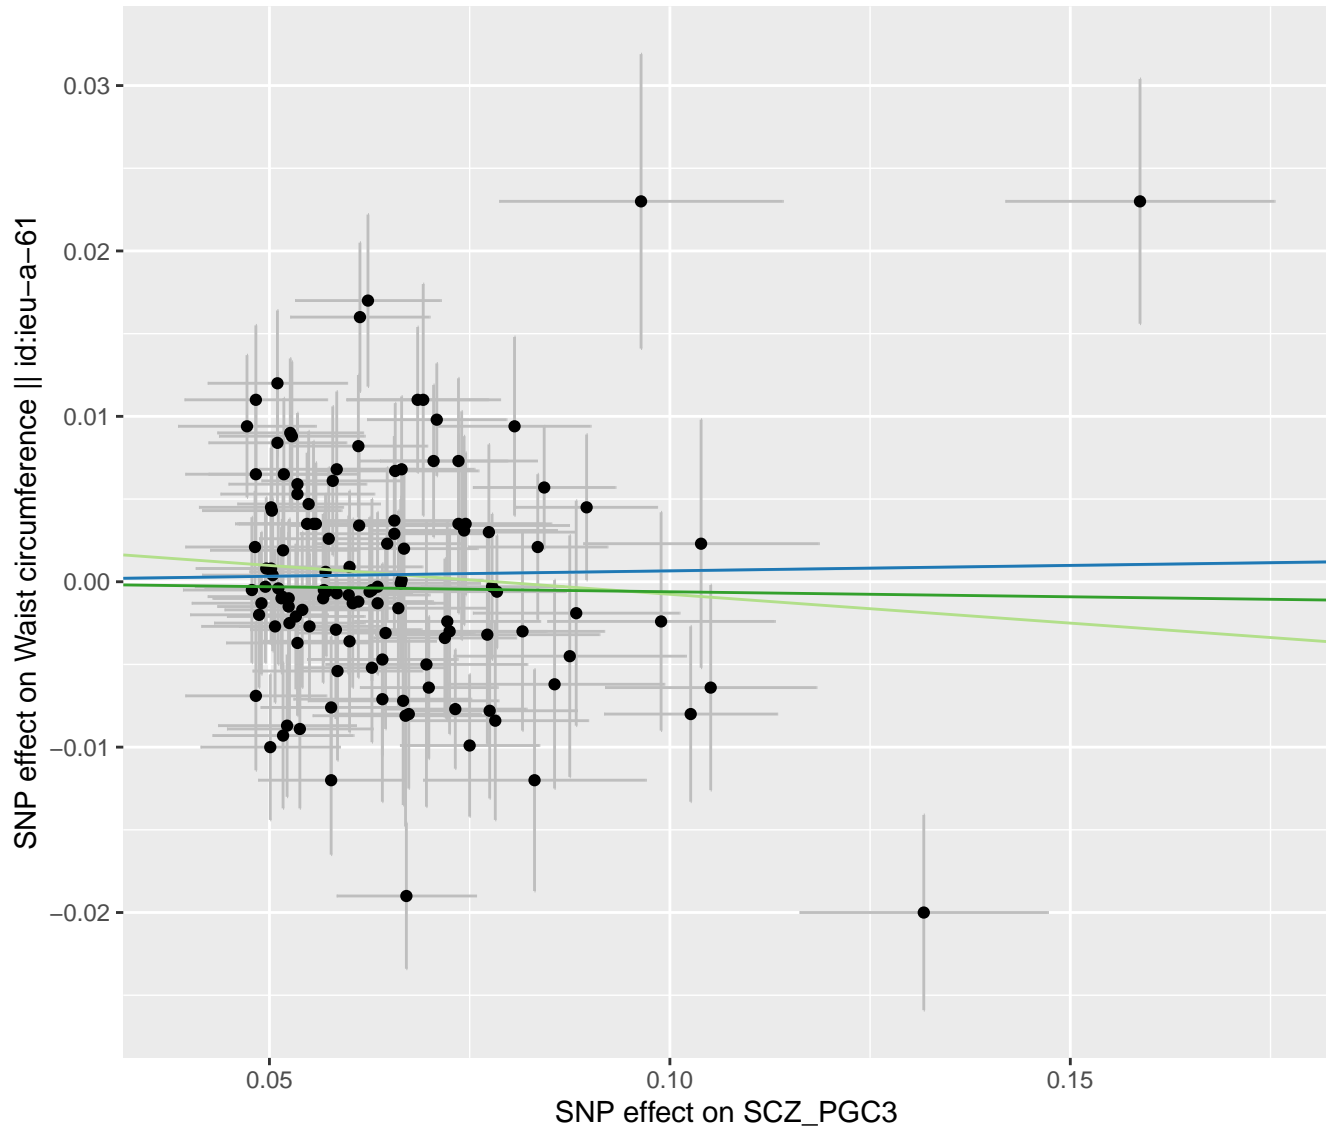

# MR Test

- Inverse variance weighted
- Maximum likelihood
- MR Egger
- Weighted median

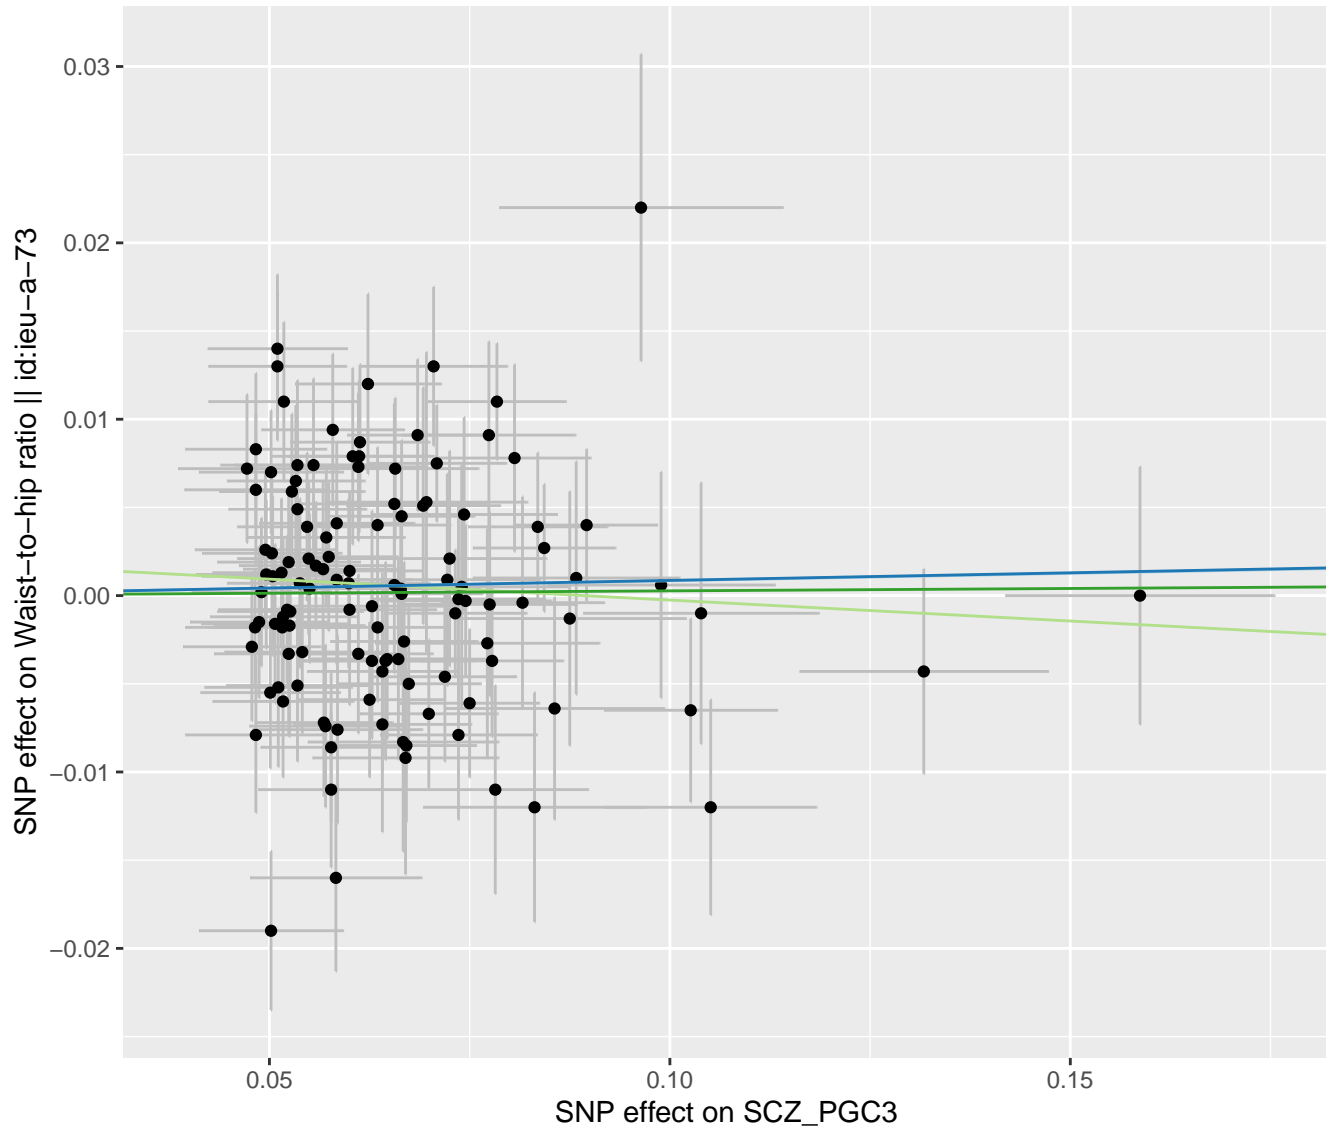

# MR Test

- Inverse variance weighted
- Maximum likelihood
- MR Egger
- Weighted median

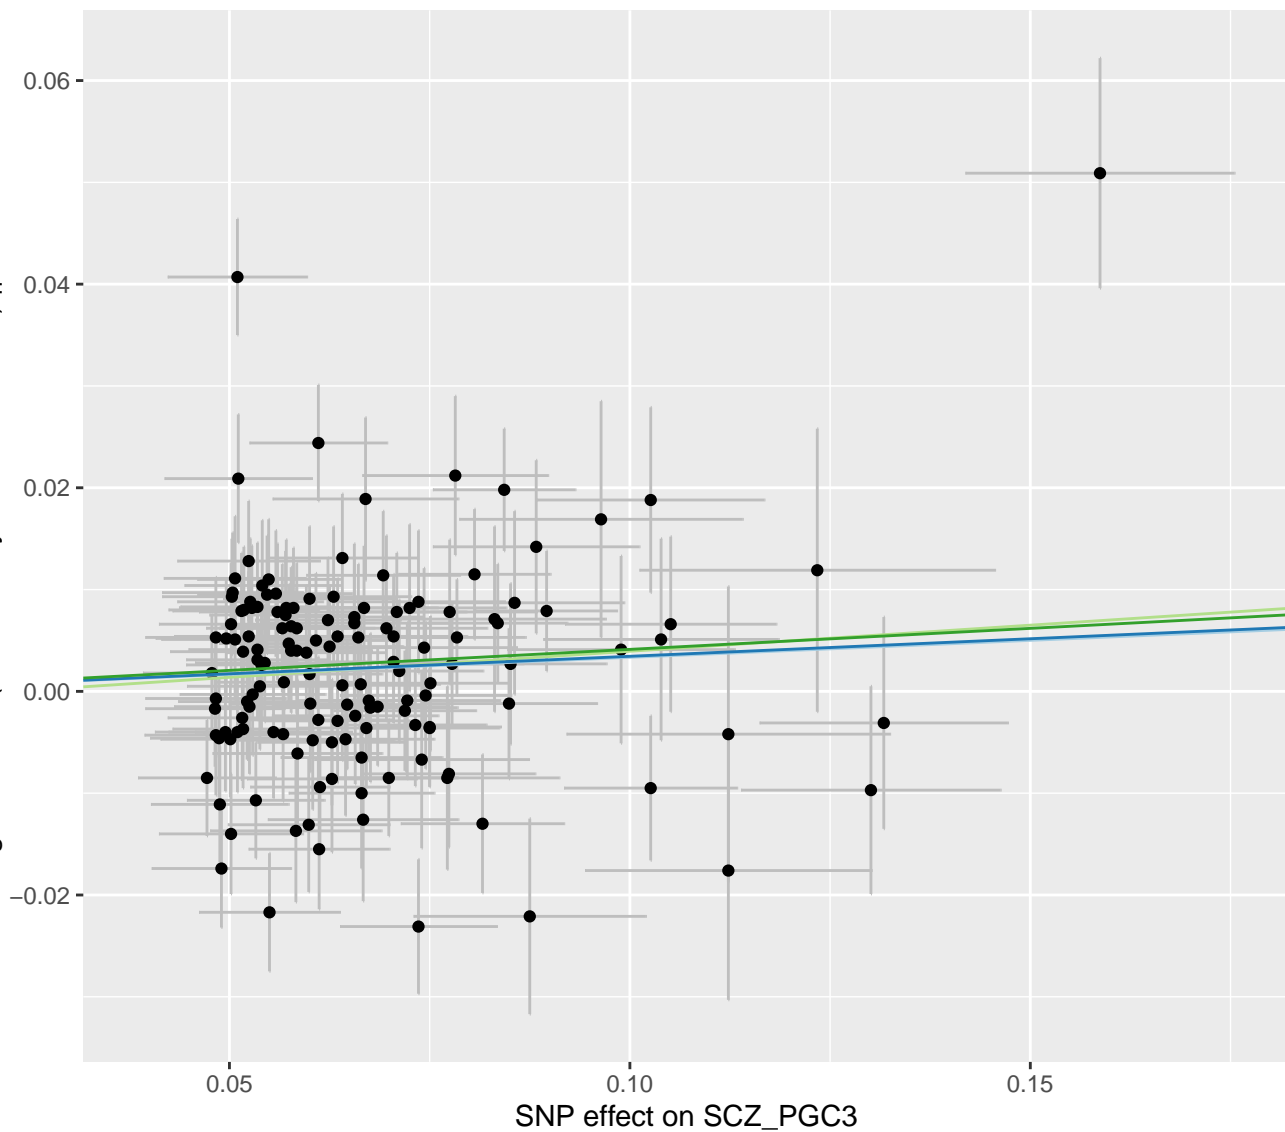

# MR Test

- Inverse variance weighted
- Maximum likelihood
- MR Egger
- Weighted median

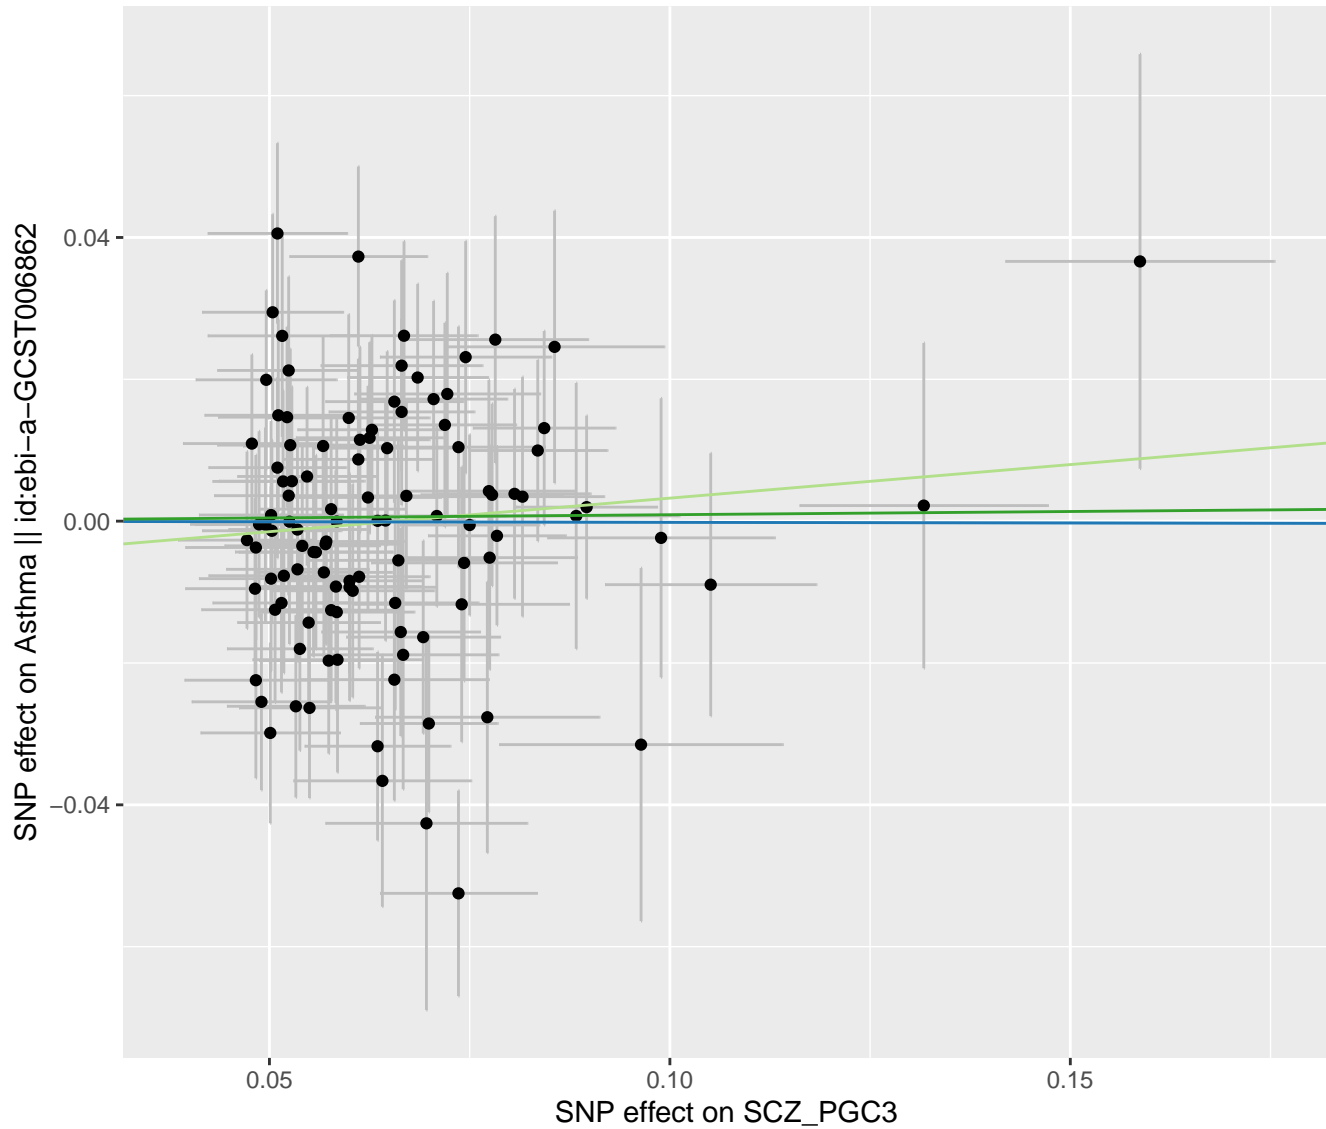

# MR Test

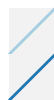

Inverse variance weighted

Maximum likelihood

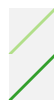

MR Egger

Weighted median

SNP effect on Crohn's disease || id:ieu-a-30

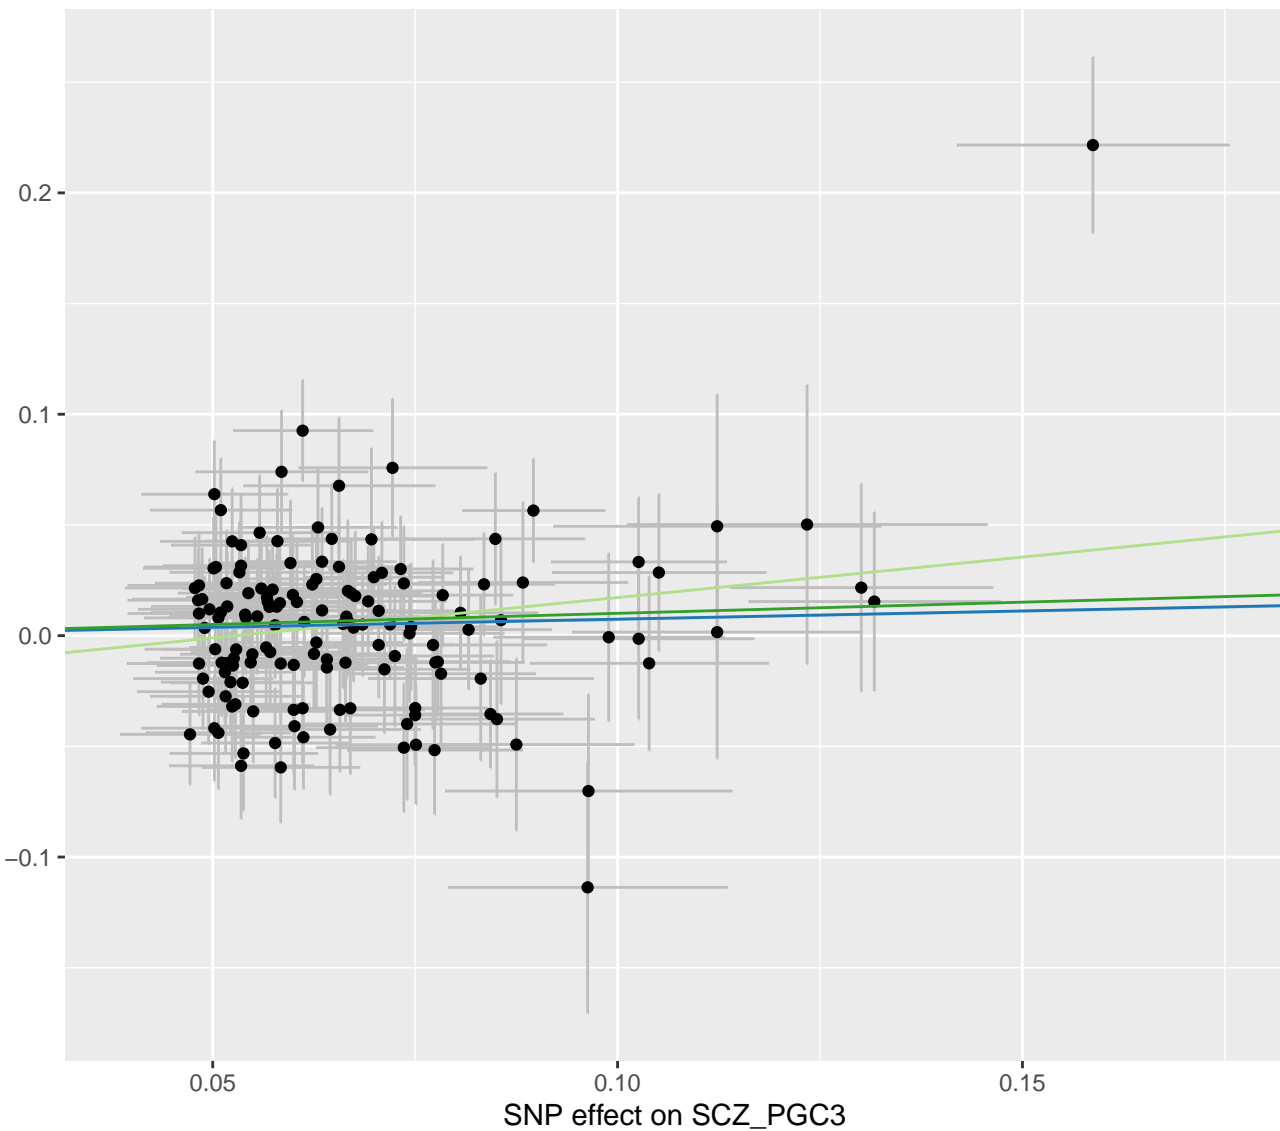

# MR Test

- Inverse variance weighted
- Maximum likelihood
- MR Egger
- Weighted median

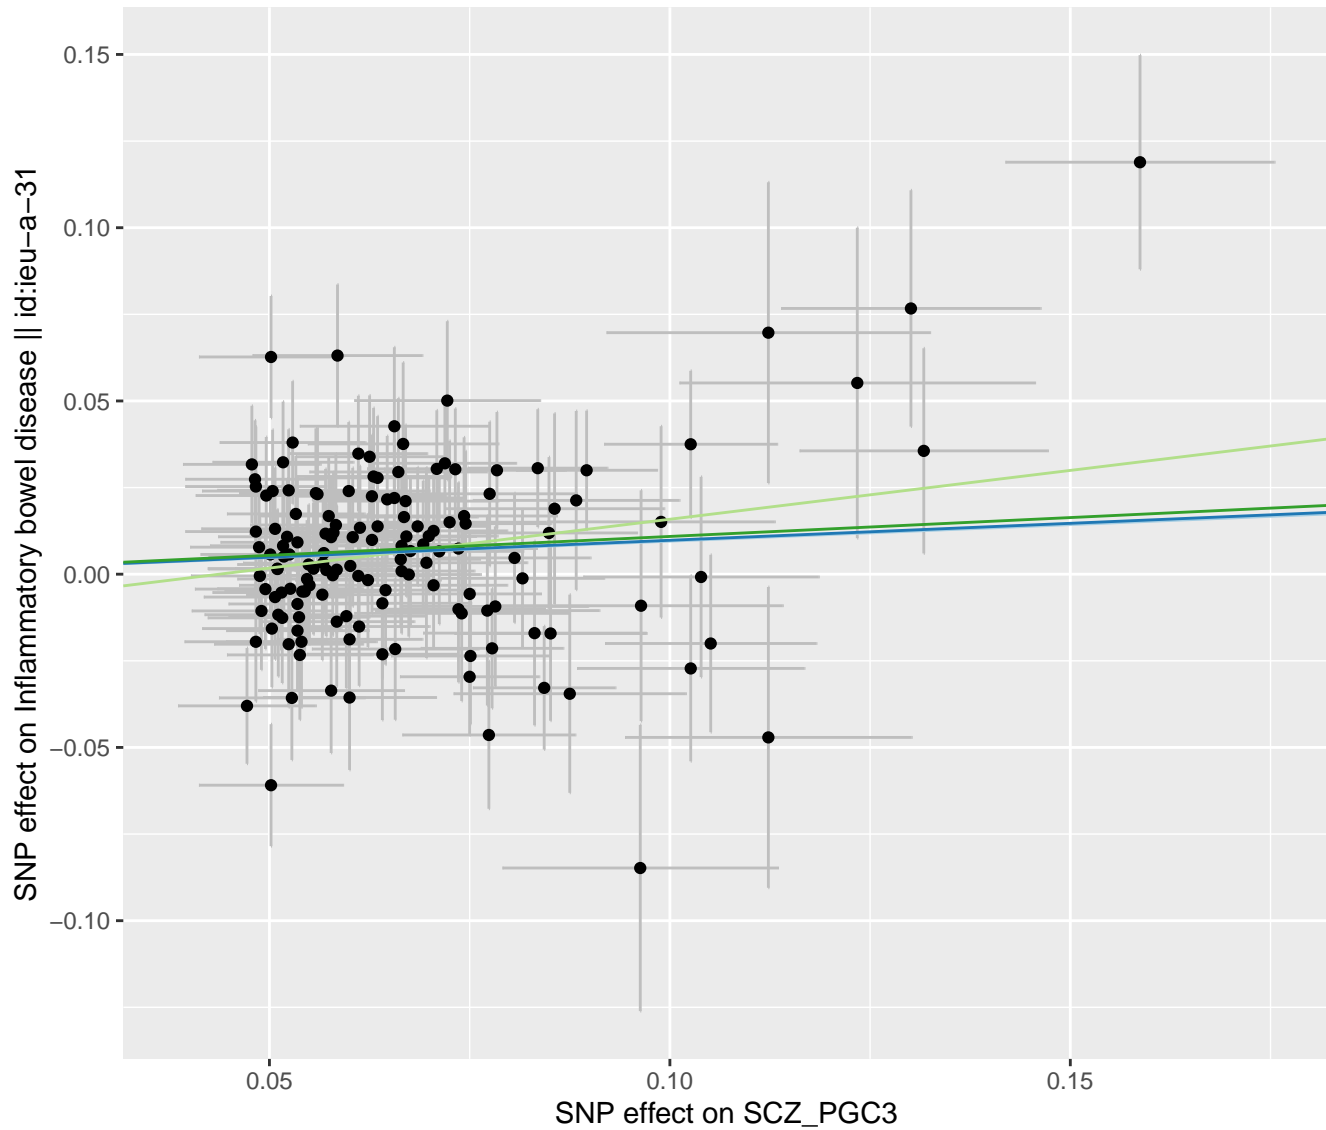



SNP effect on Primary biliary cholangitis || id:ebi-a-GCST003129

# MR Test

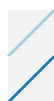

Inverse variance weighted

Maximum likelihood

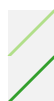

MR Egger

Weighted median

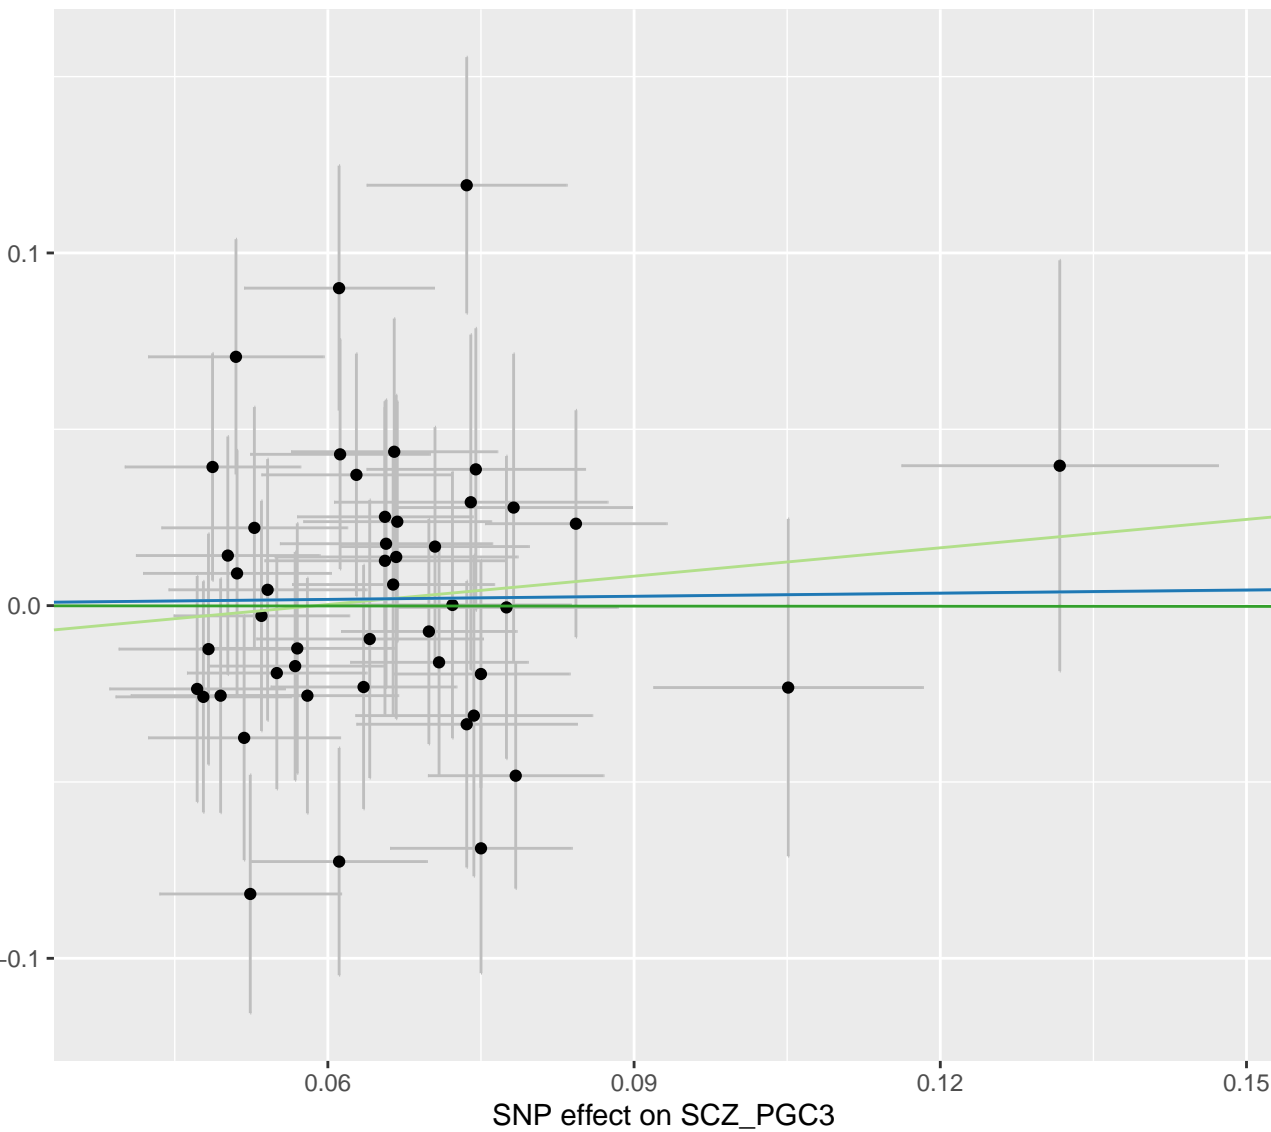

# MR Test

- Inverse variance weighted
- Maximum likelihood
- MR Egger
- Weighted median

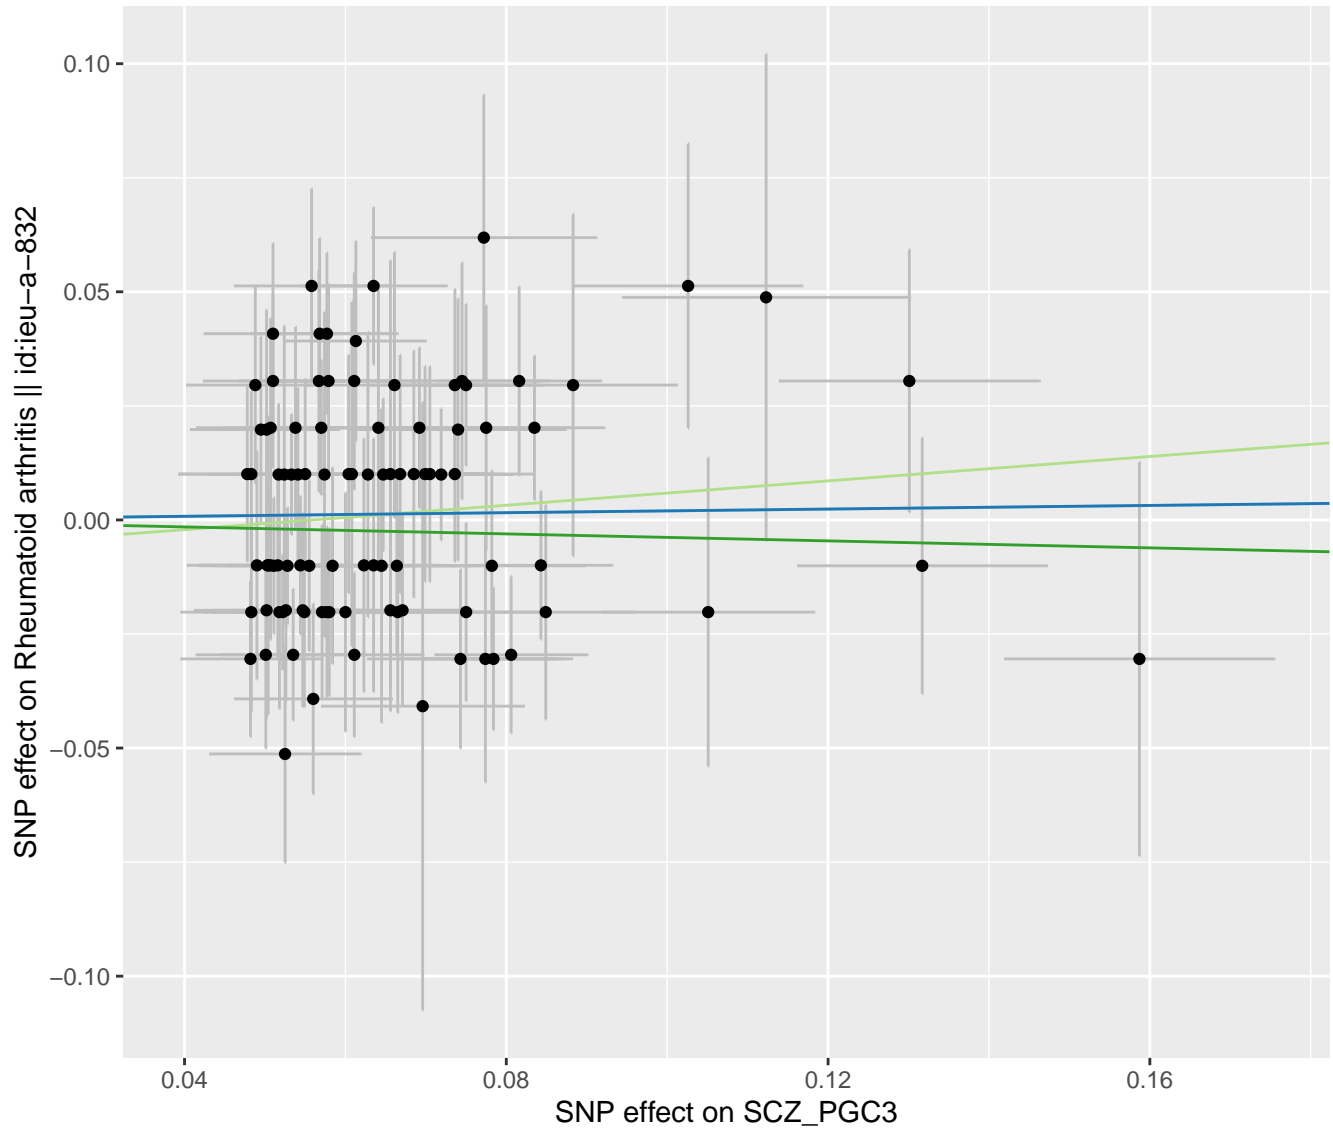

SNP effect on Systemic lupus erythematosus || id:ebi-a-GCST003156

MR Test

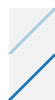

Inverse variance weighted

Maximum likelihood

MR Egger

Weighted median

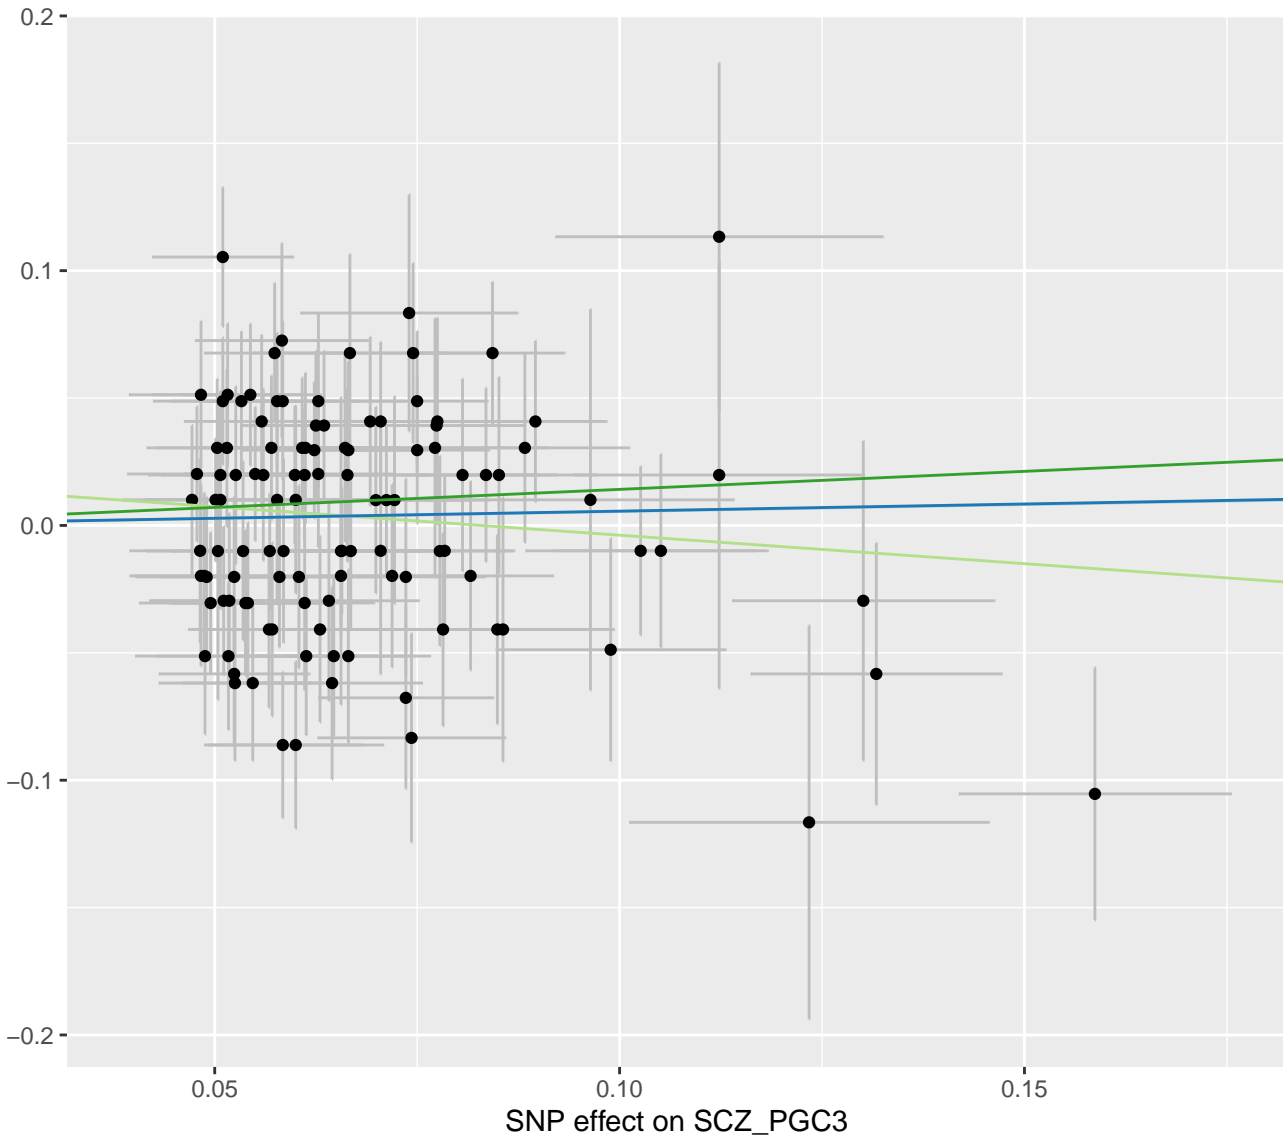

# MR Test



Inverse variance weighted

Maximum likelihood

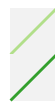

MR Egger

Weighted median

SNP effect on Ulcerative colitis || id:ieu-a-32

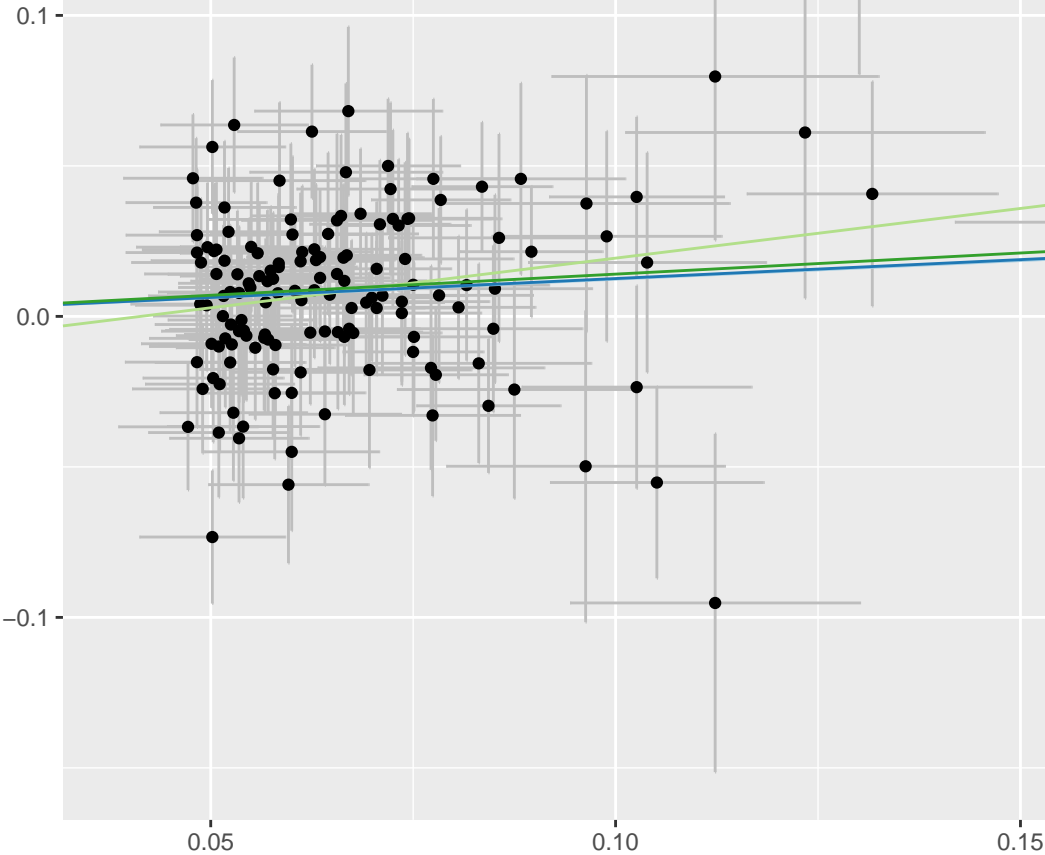

# MR Test

- Inverse variance weighted
- Maximum likelihood
- MR Egger
- Weighted median

SNP effect on Ever smoked || id:ukb-b-20261

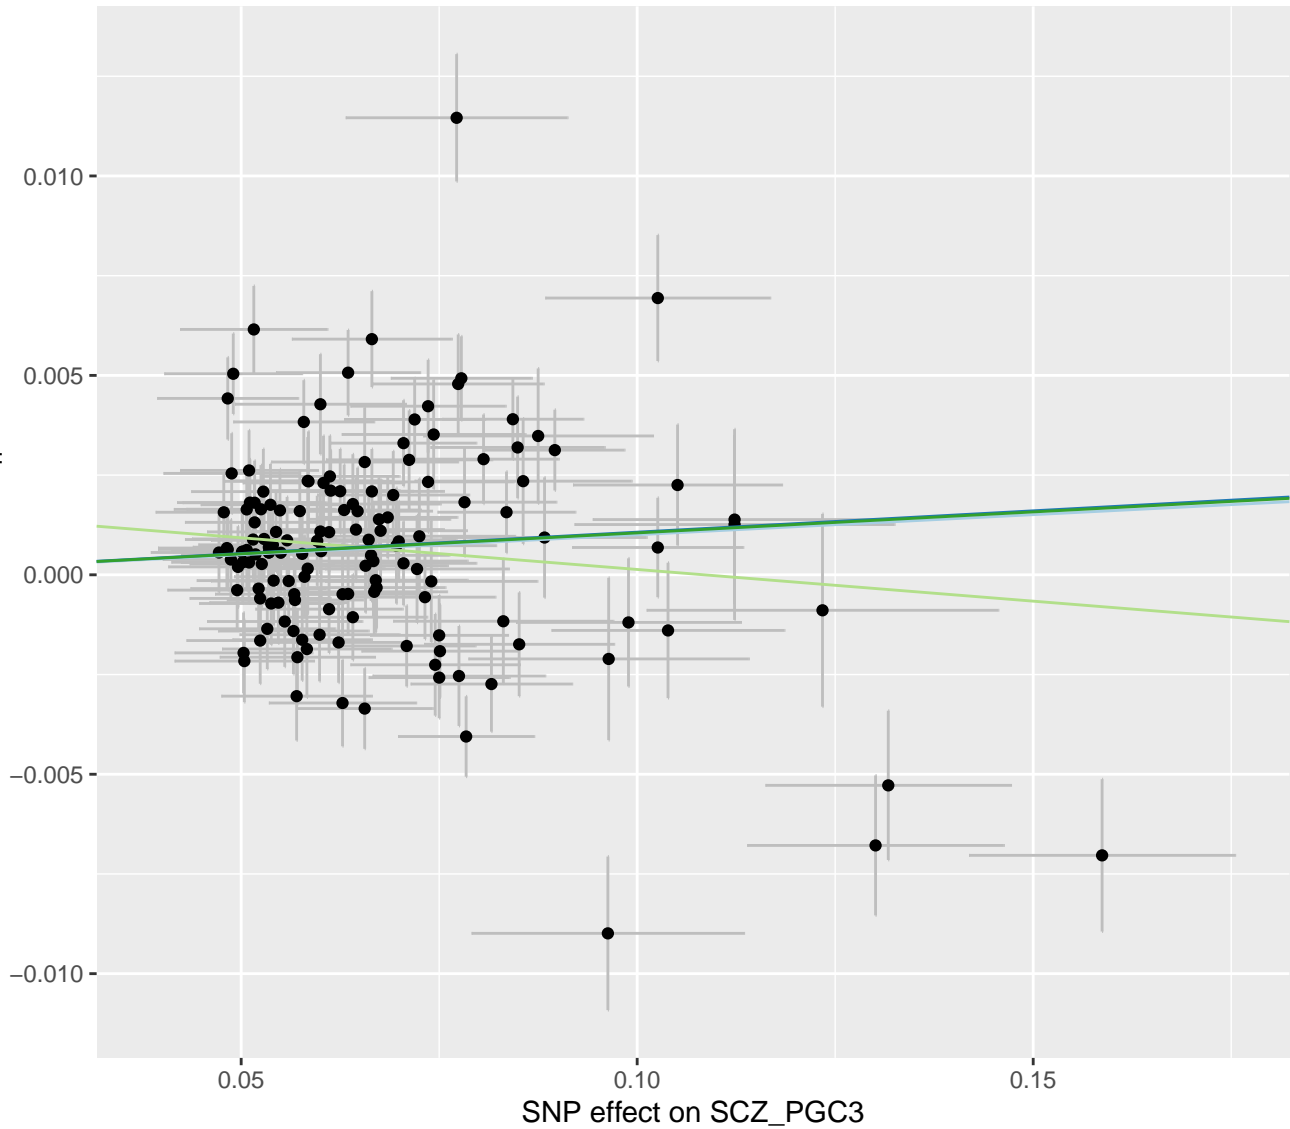

# MR Test

- Inverse variance weighted
- Maximum likelihood
- MR Egger
- Weighted median

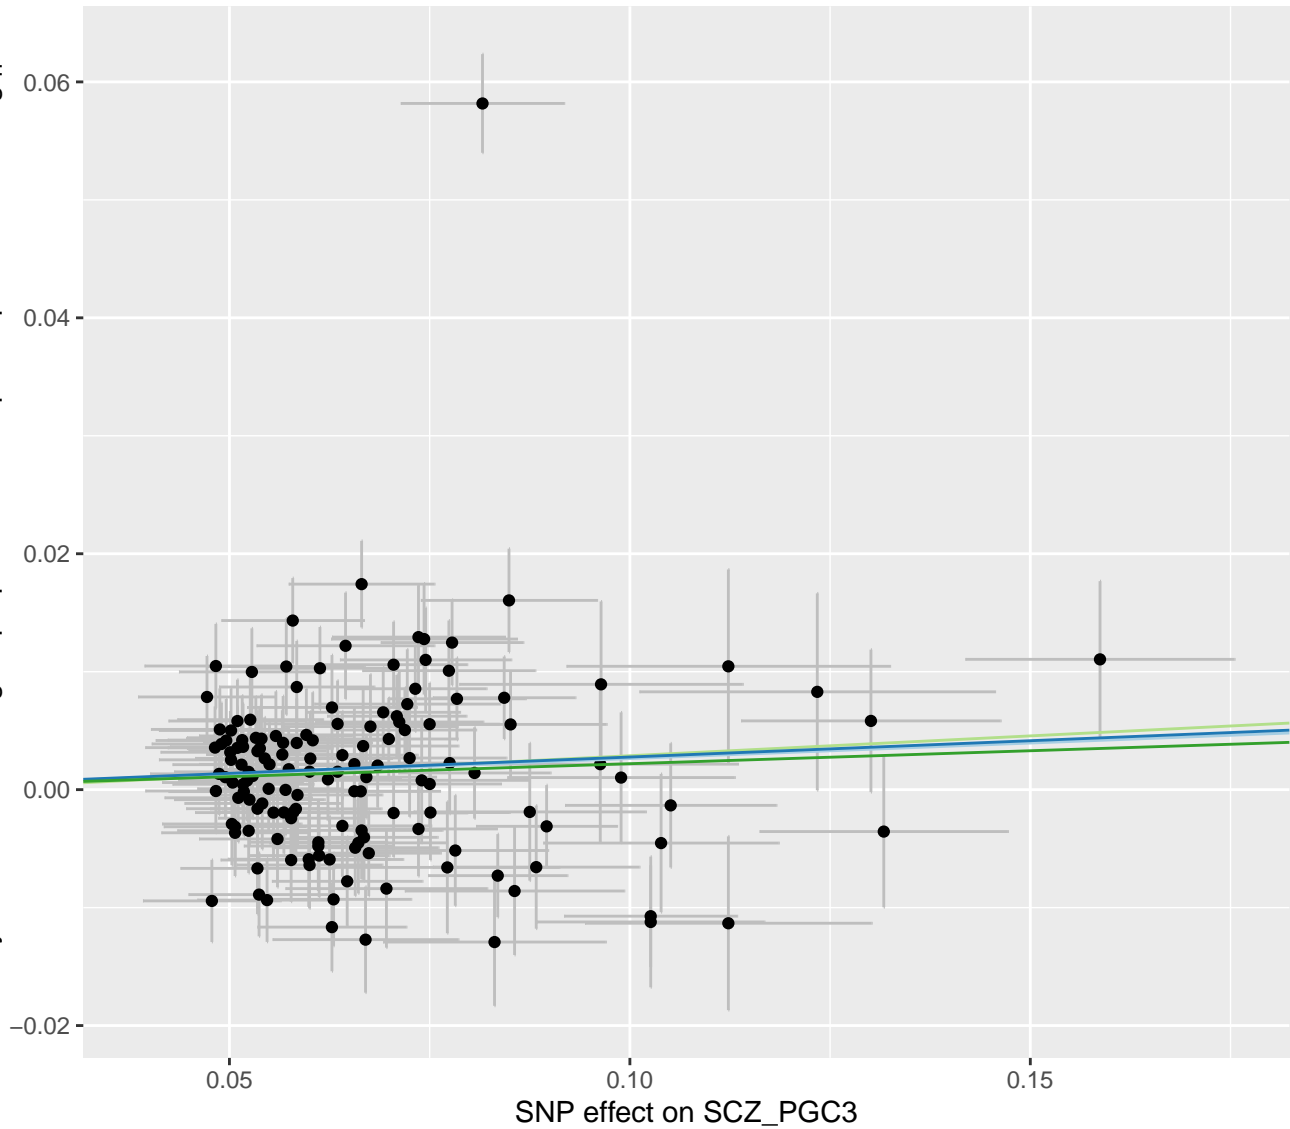

# MR Test

- Inverse variance weighted
- Maximum likelihood
- MR Egger
- Weighted median

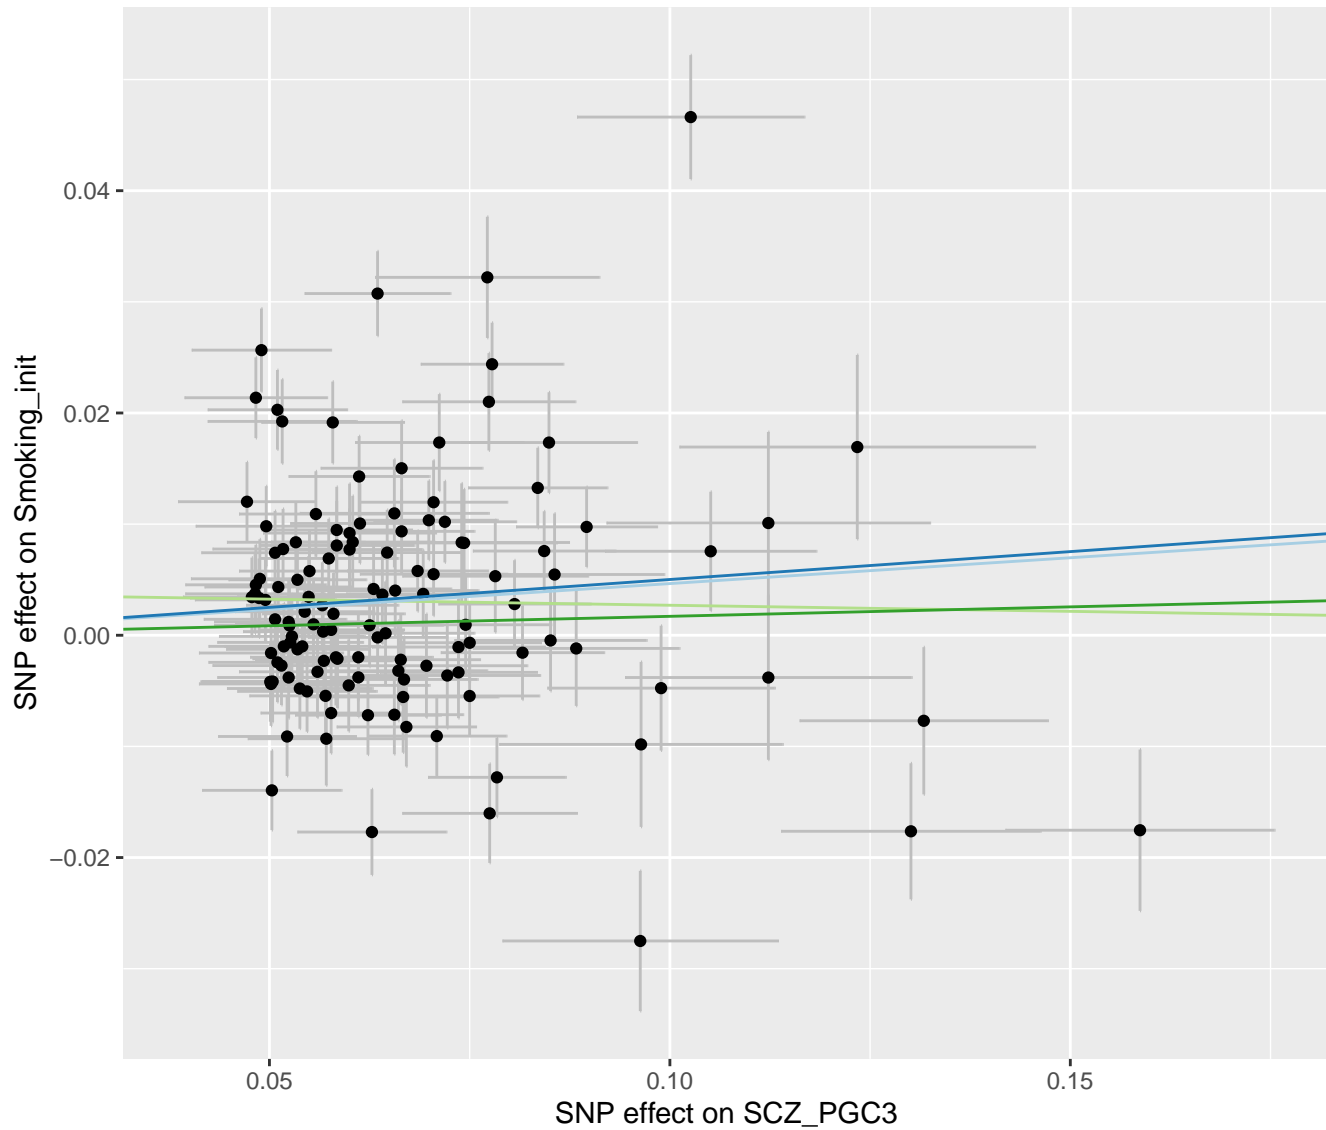

# MR Test

- Inverse variance weighted
- Maximum likelihood
- MR Egger
- Weighted median

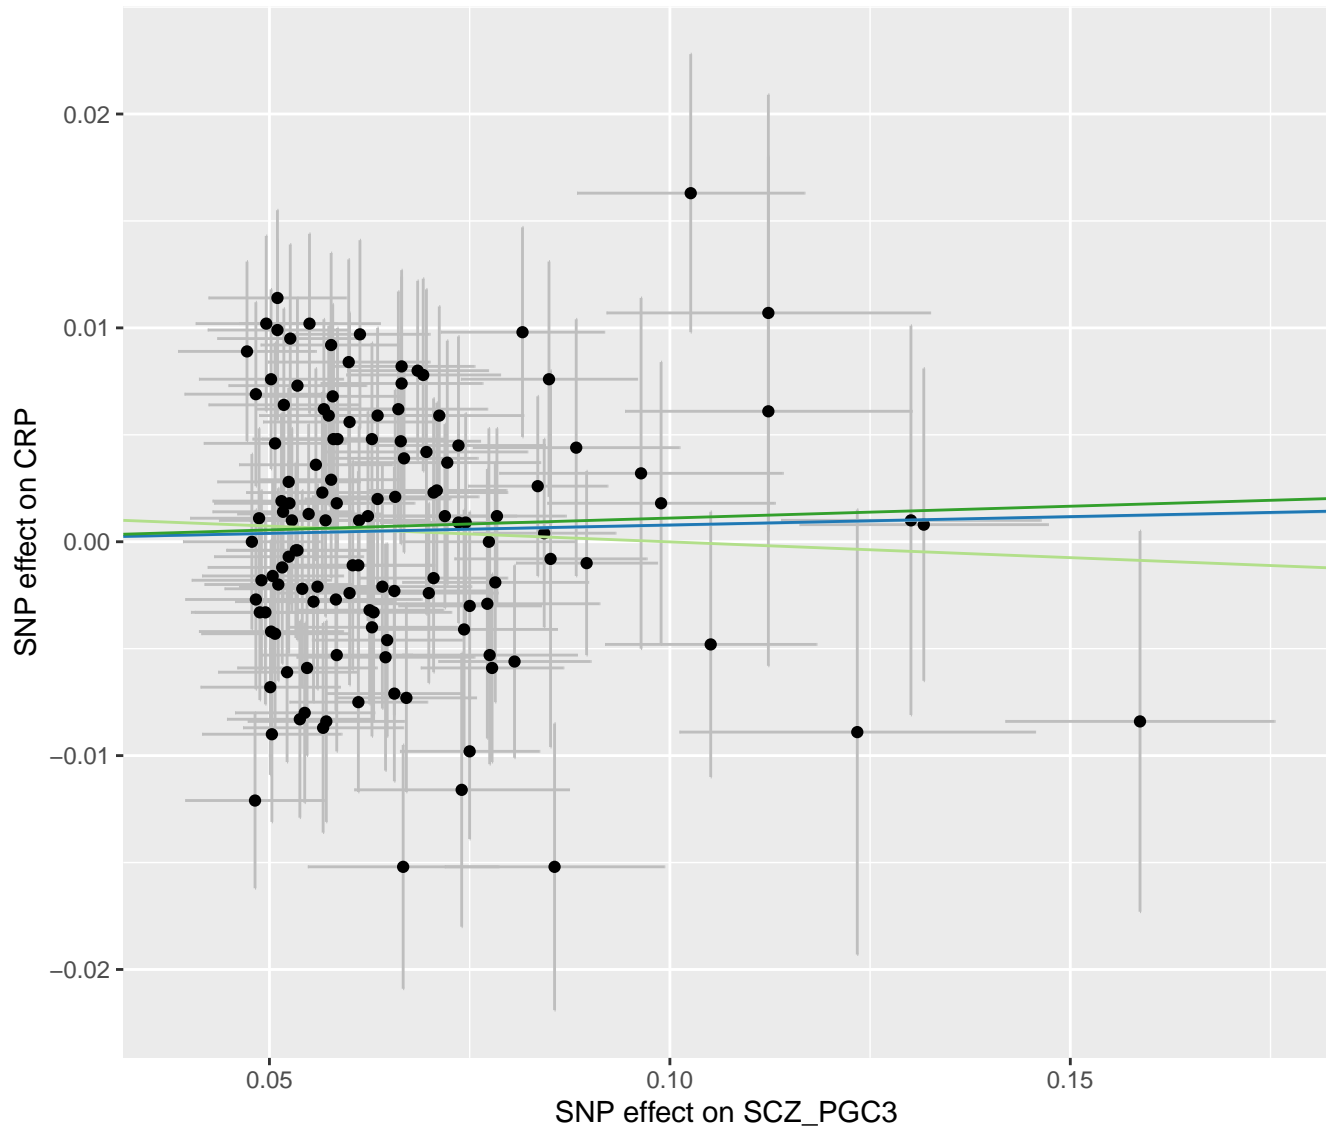



# MR Test

- Inverse variance weighted
- Maximum likelihood
- MR Egger
- Weighted median

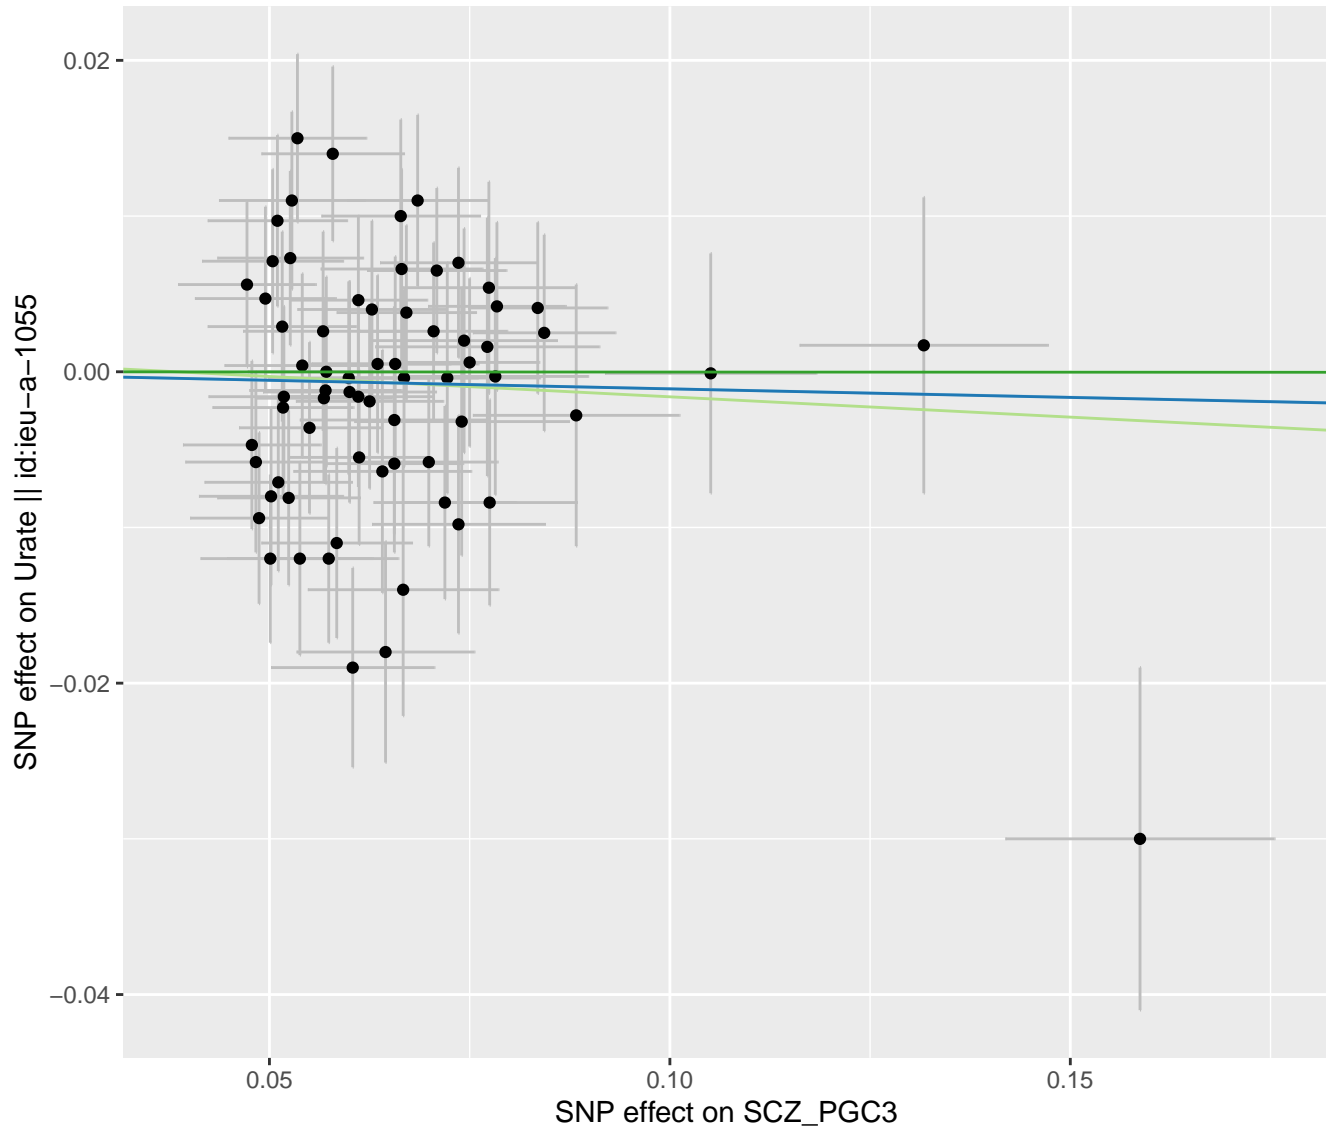

# MR Test

- Inverse variance weighted
- Maximum likelihood
- MR Egger
- Weighted median

SNP effect on Urinary albumin excretion || id:ebi-a-GCST006586

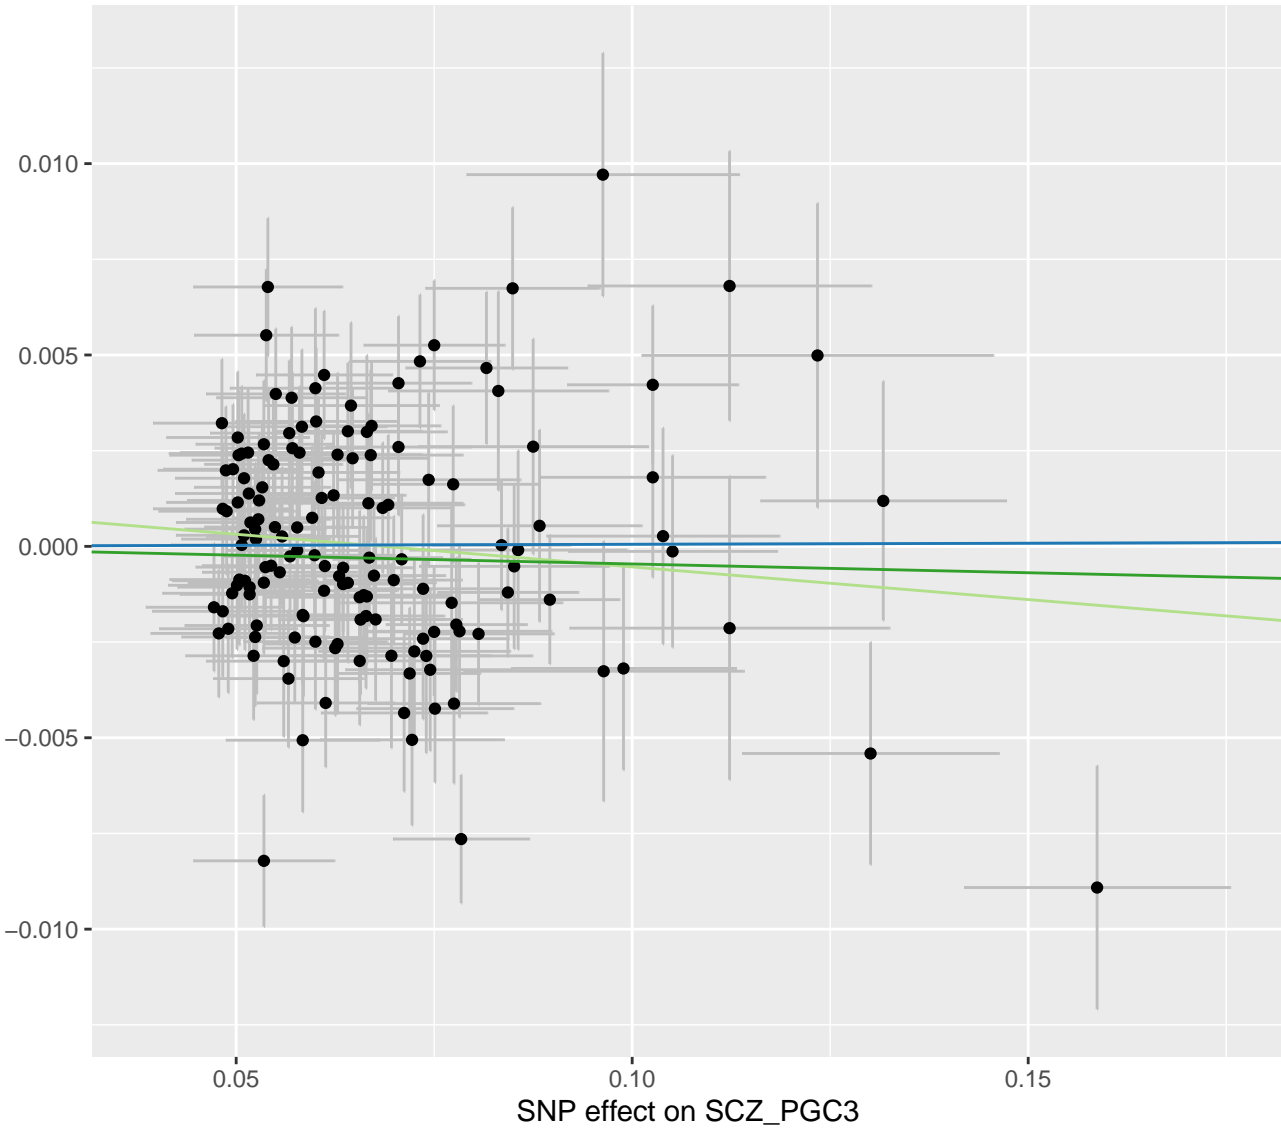

# MR Test

- Inverse variance weighted
- MR Egger
- Maximum likelihood
- Weighted median

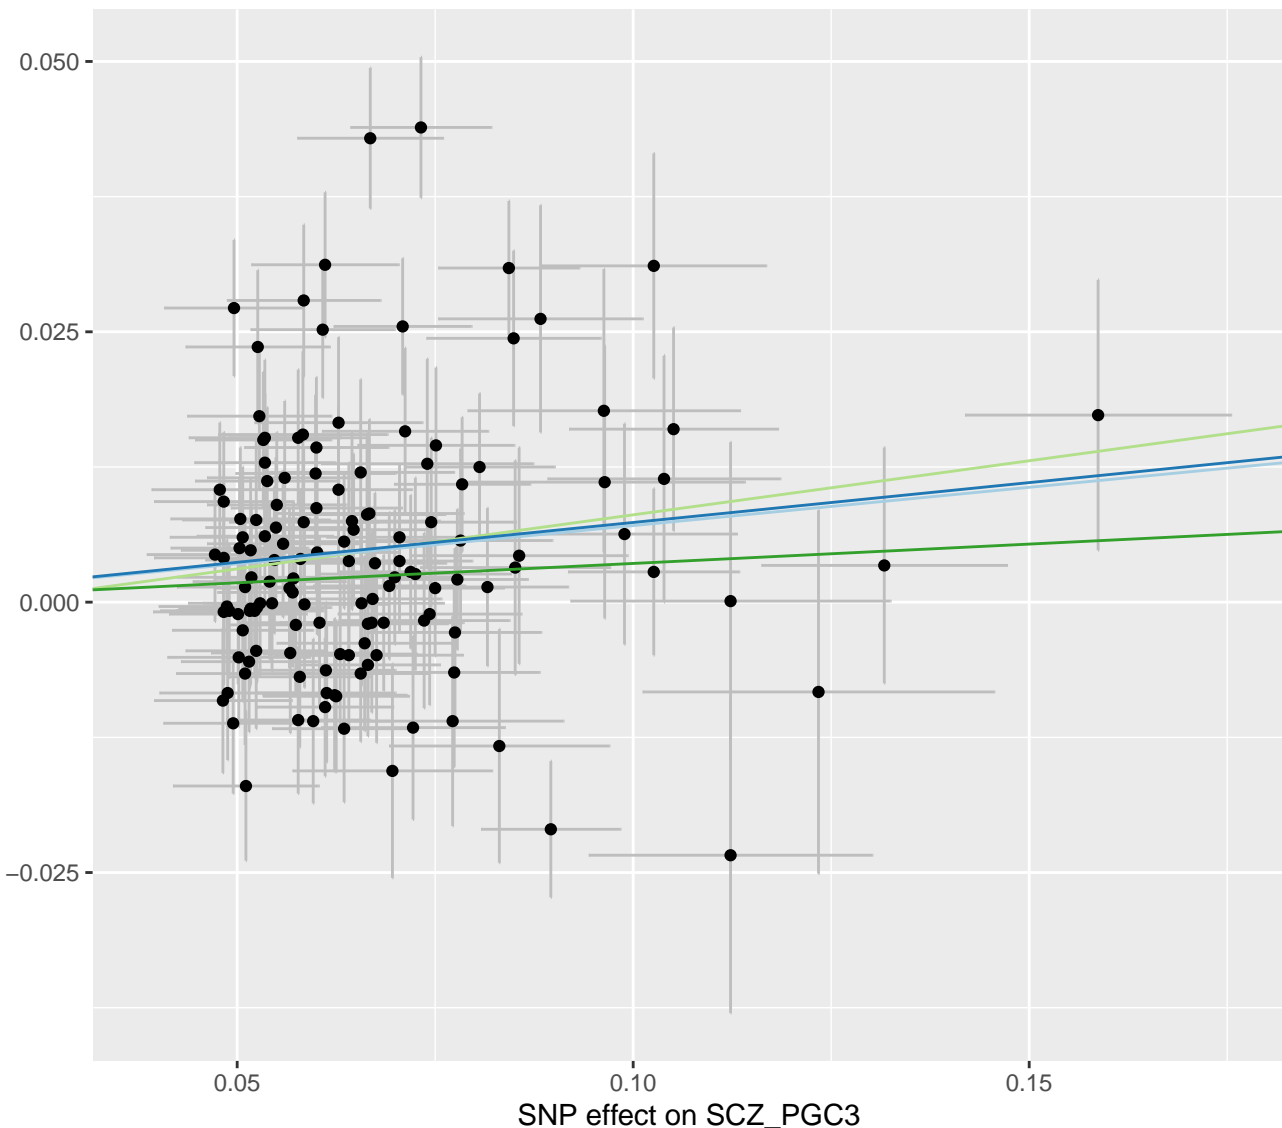

# MR Test

- Inverse variance weighted
- MR Egger
- Maximum likelihood
- Weighted median

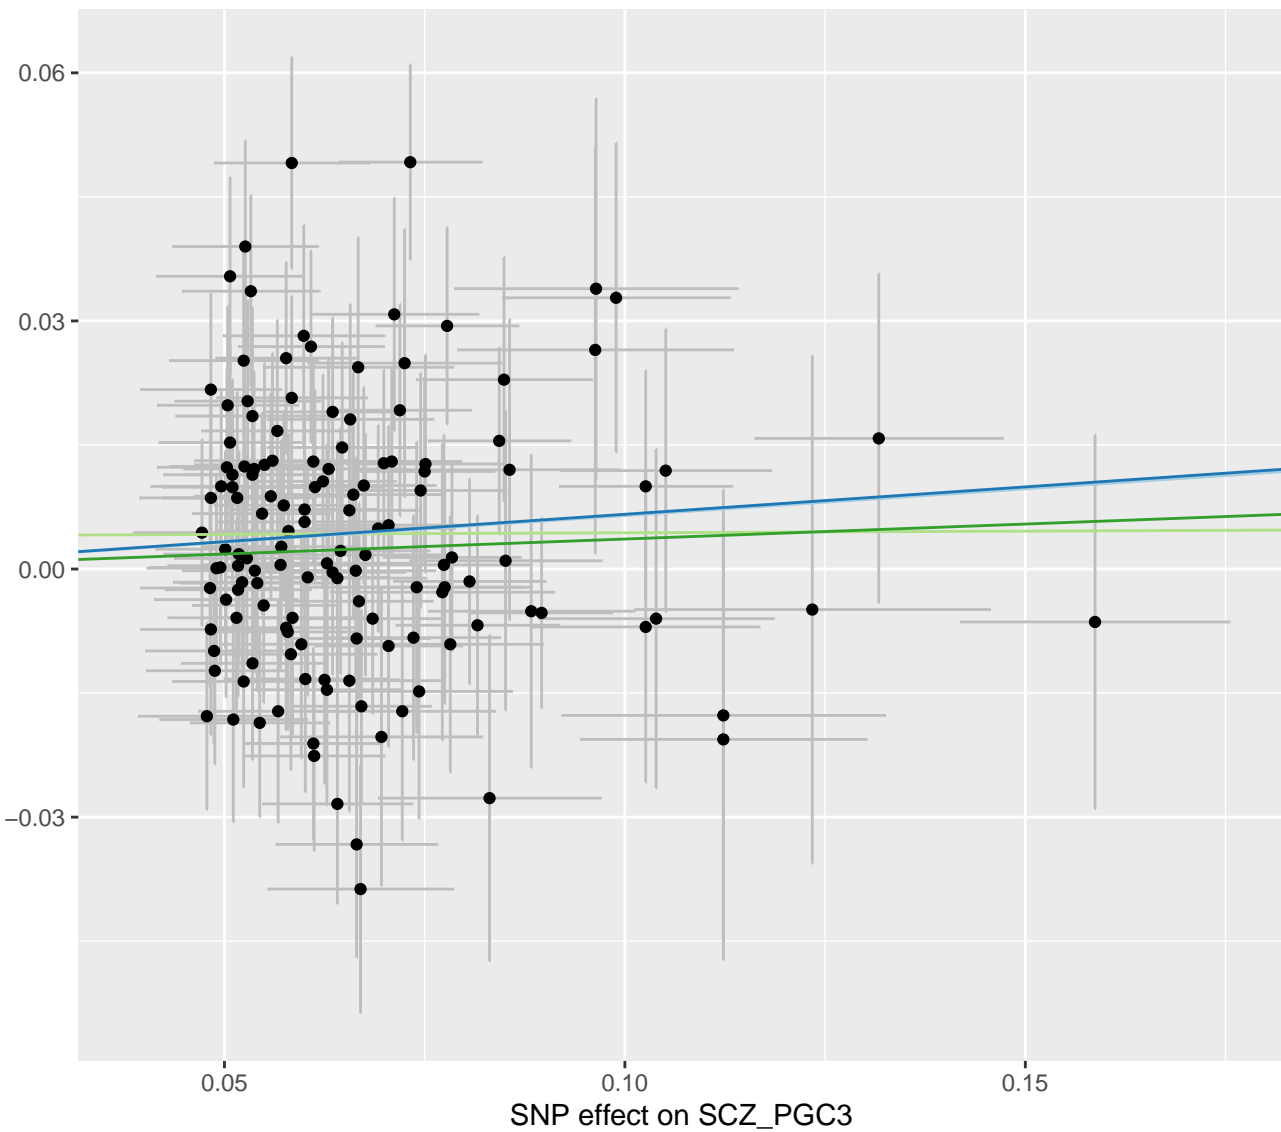

# MR Test

- Inverse variance weighted
- MR Egger
- Maximum likelihood
- Weighted median

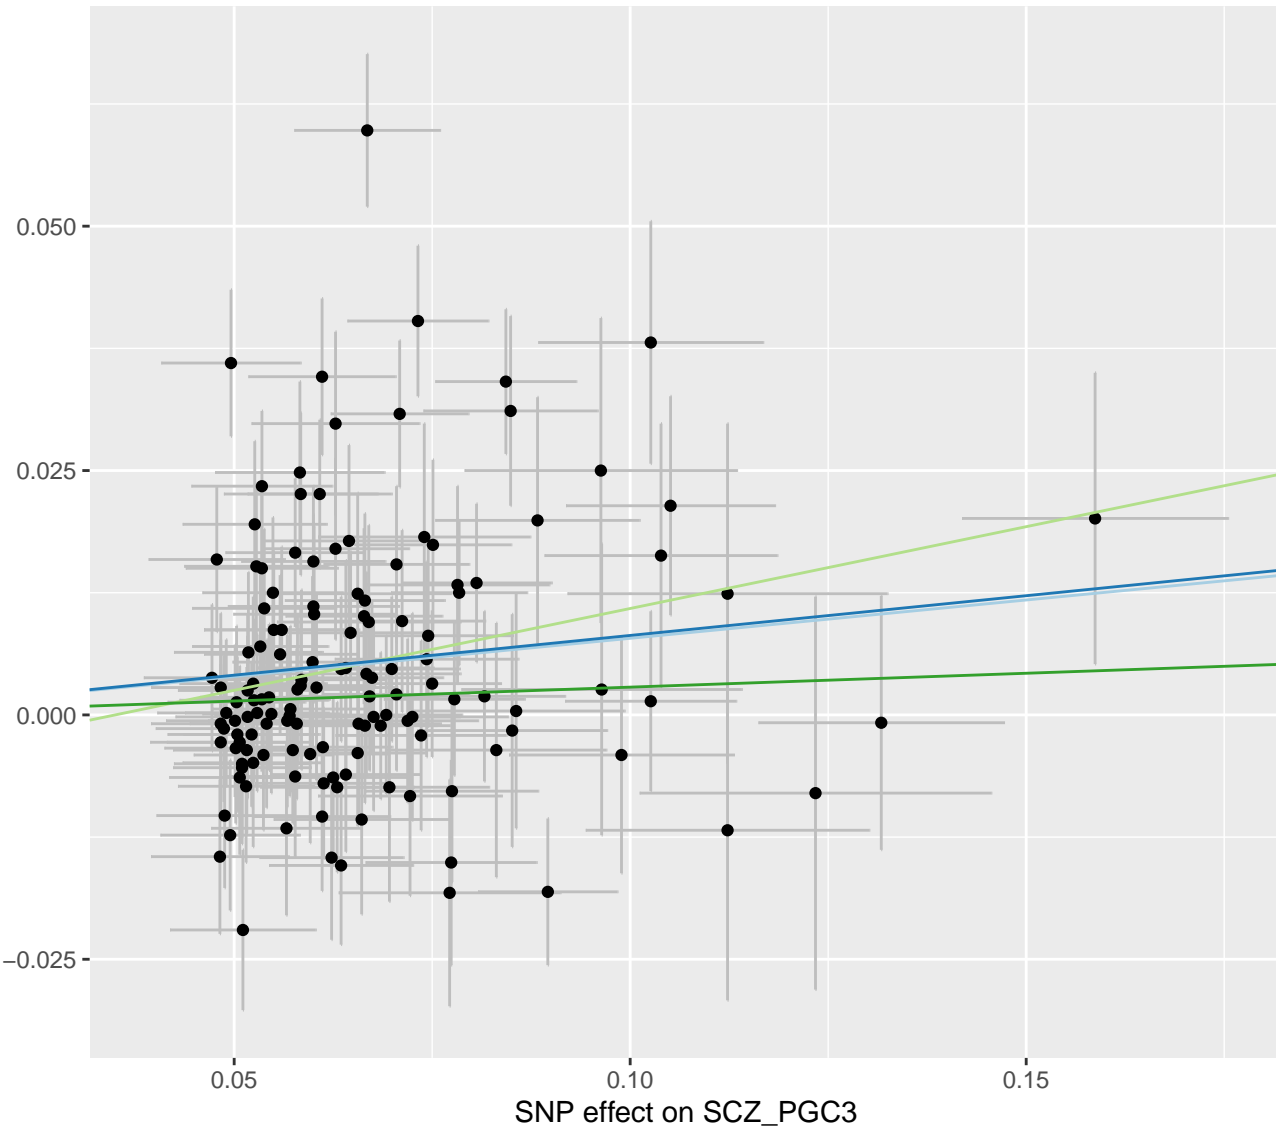

# MR Test

- Inverse variance weighted
- Maximum likelihood
- MR Egger
- Weighted median

SNP effect on Atrial fibrillation || id:ebi-a-GCST006414

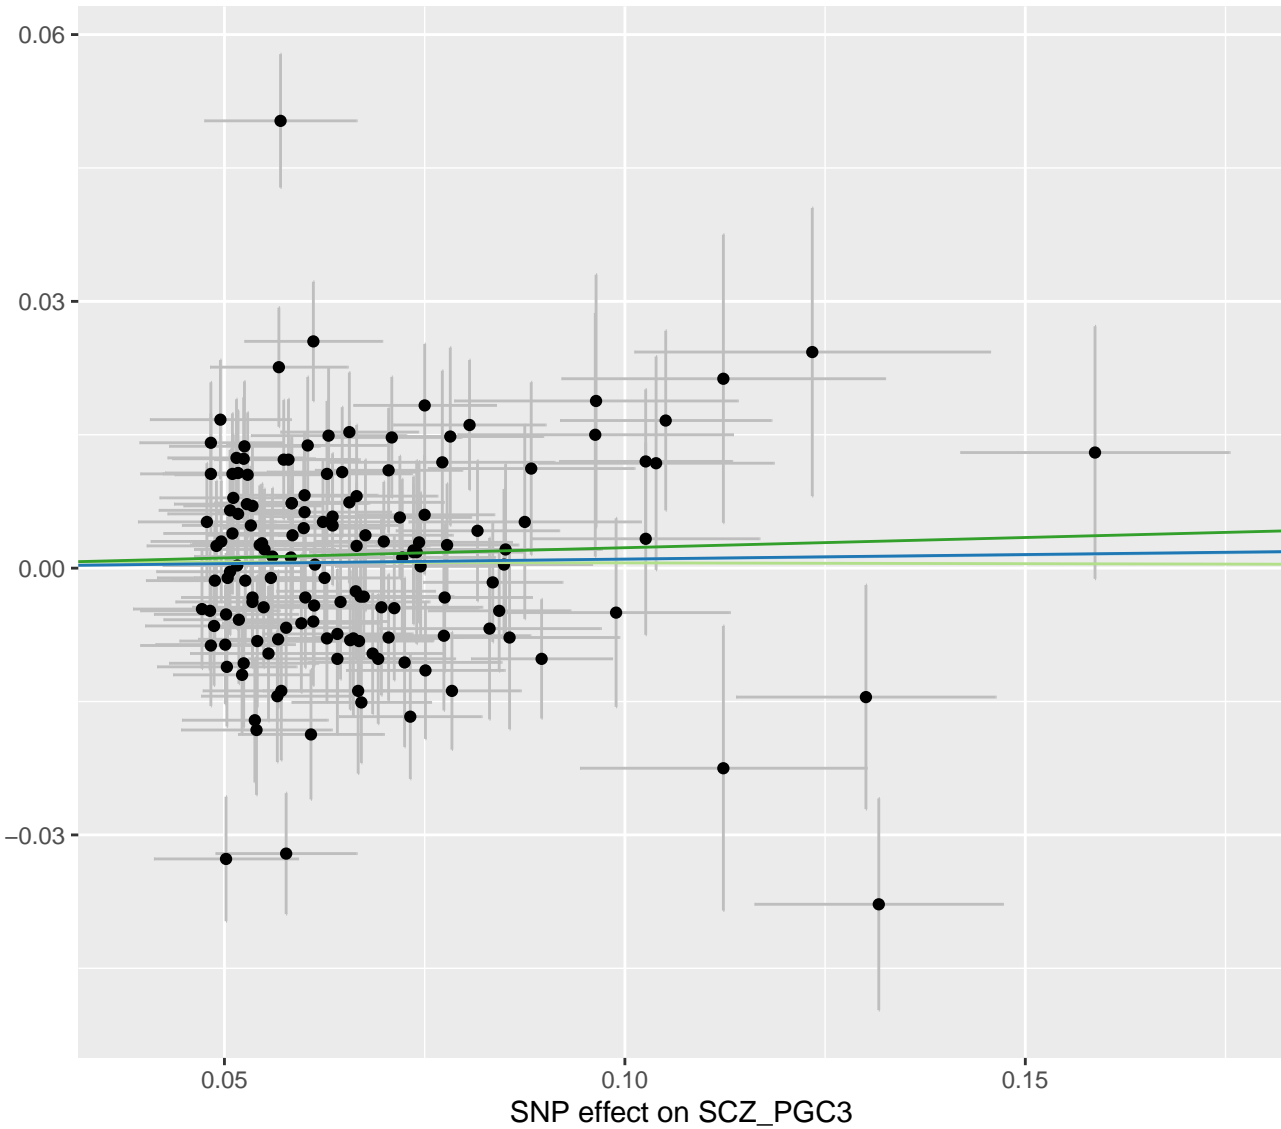

# MR Test

- Inverse variance weighted
- Maximum likelihood
- MR Egger
- Weighted median

SNP effect on Cholesterol, total || id:ebi-a-GCST002221

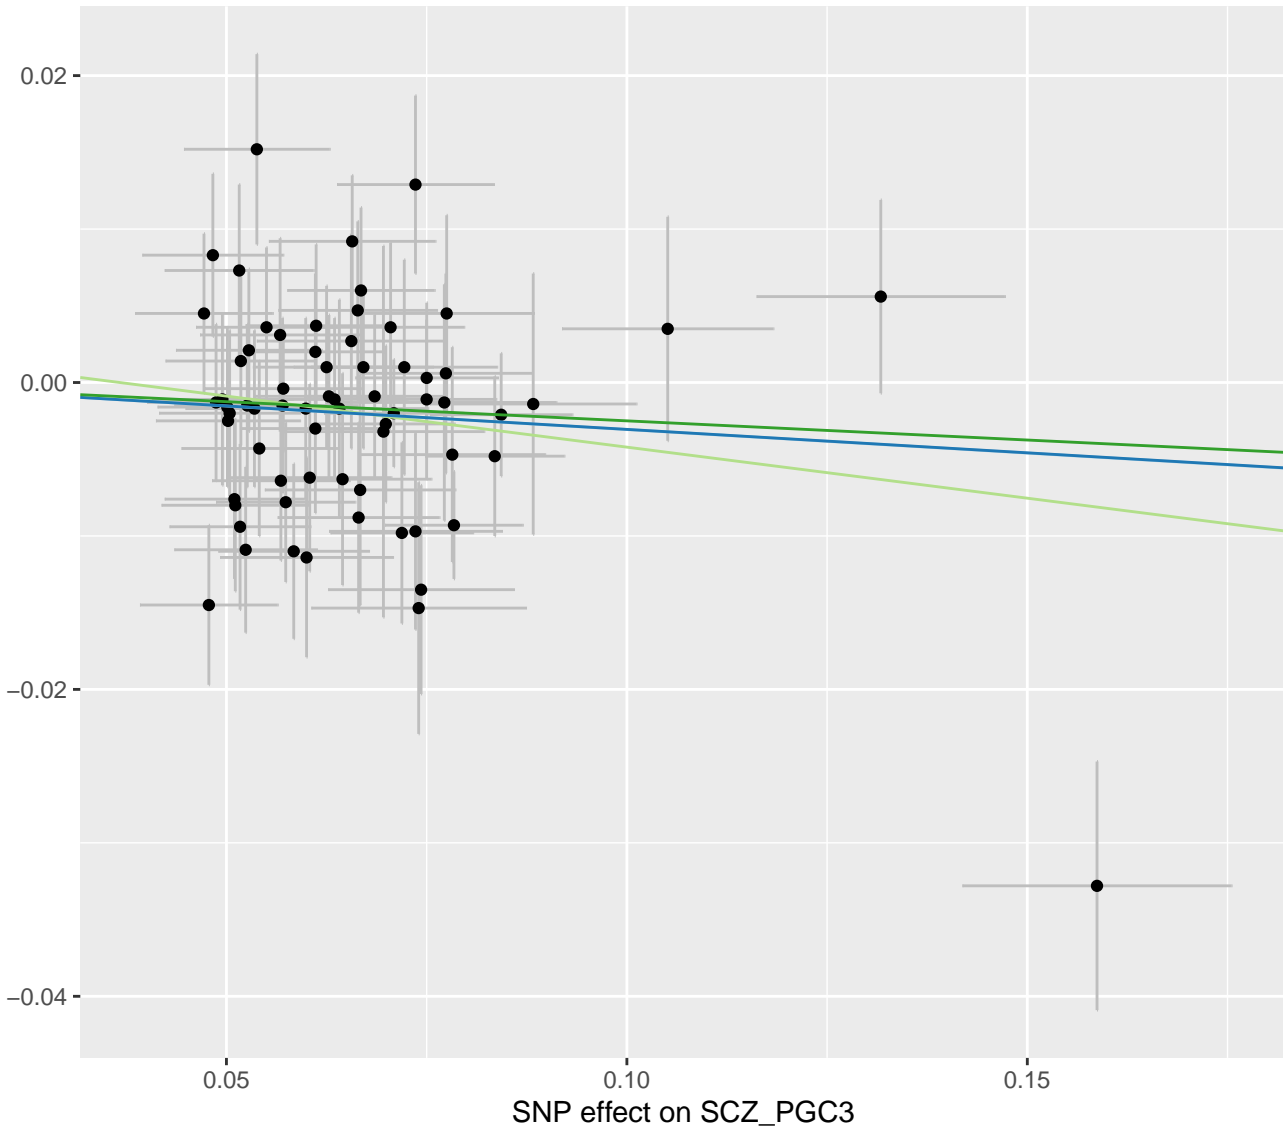

SNP effect on Coronary artery disease || id:ebi-a-GCST003116

MR Test

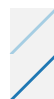

Inverse variance weighted

Maximum likelihood

MR Egger

Weighted median

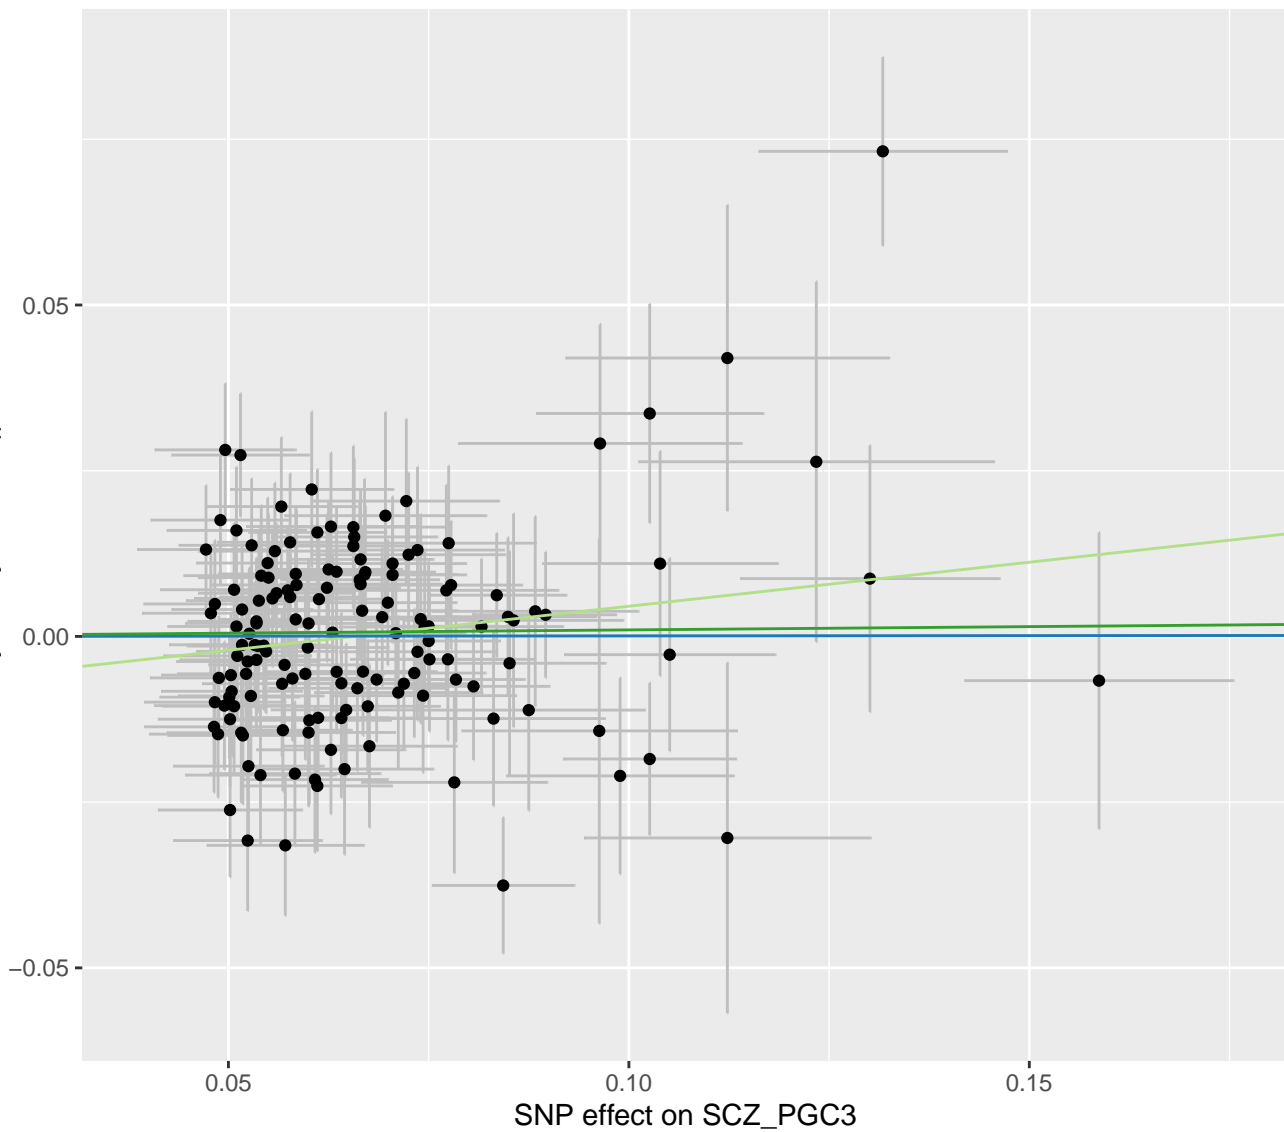



SNP effect on HDL cholesterol || id:ebi-a-GCST002223

MR Test

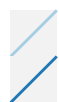

Inverse variance weighted

Maximum likelihood

MR Egger

Weighted median

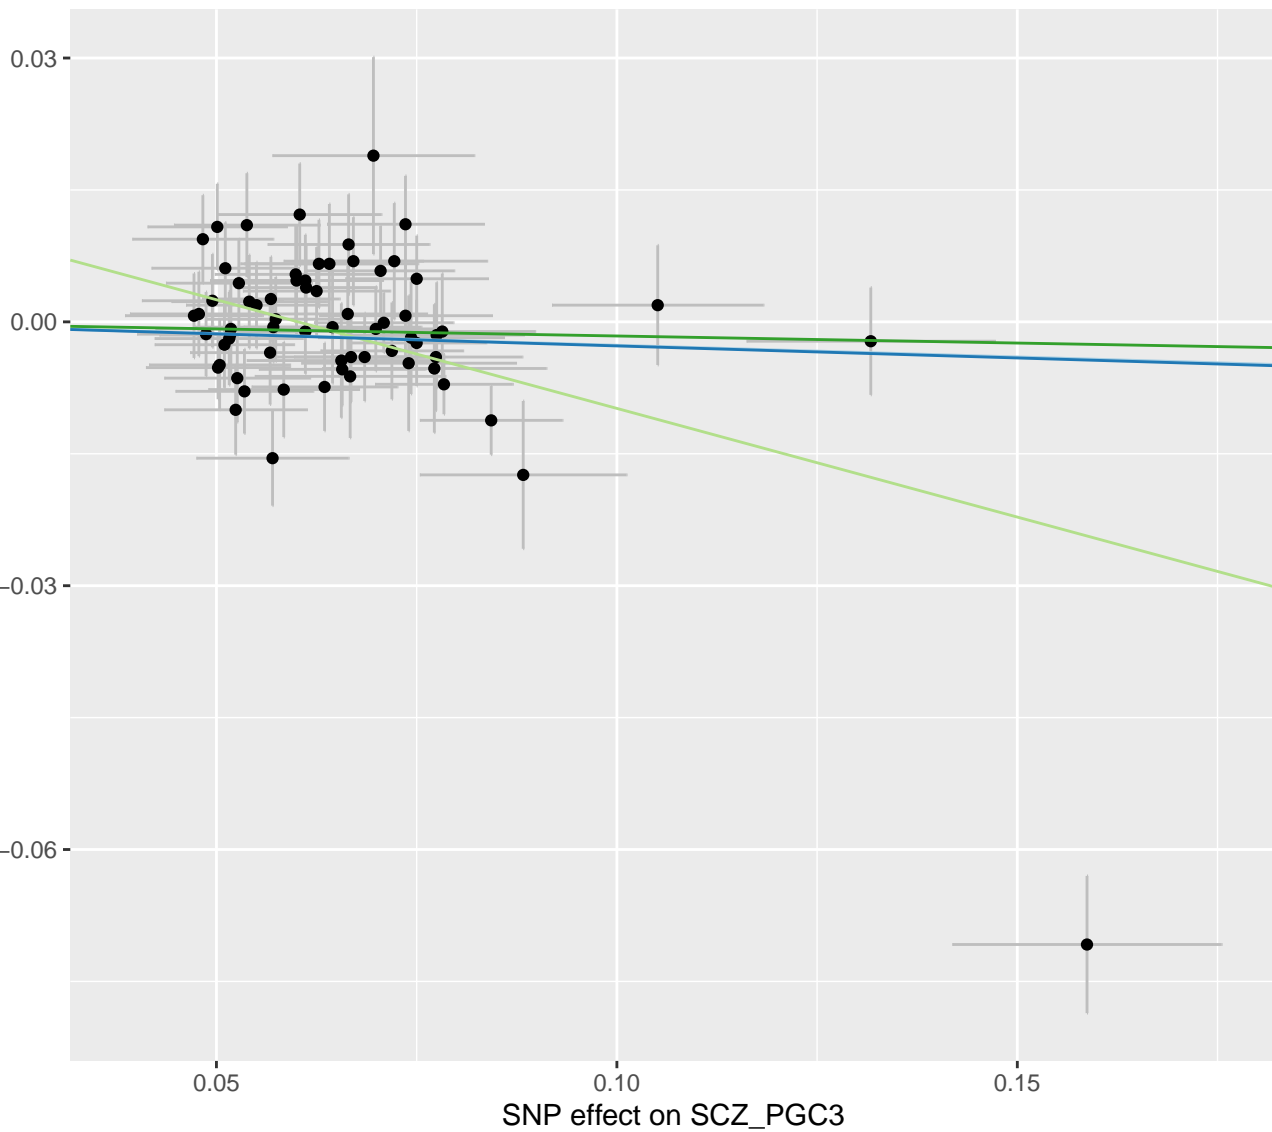

# MR Test

- Inverse variance weighted
- Maximum likelihood
- MR Egger
- Weighted median

SNP effect on LDL cholesterol || id:ebi-a-GCST002222

0.01  
0.00  
-0.01  
-0.02

0.05

0.10

0.15

SNP effect on SCZ\_PGC3

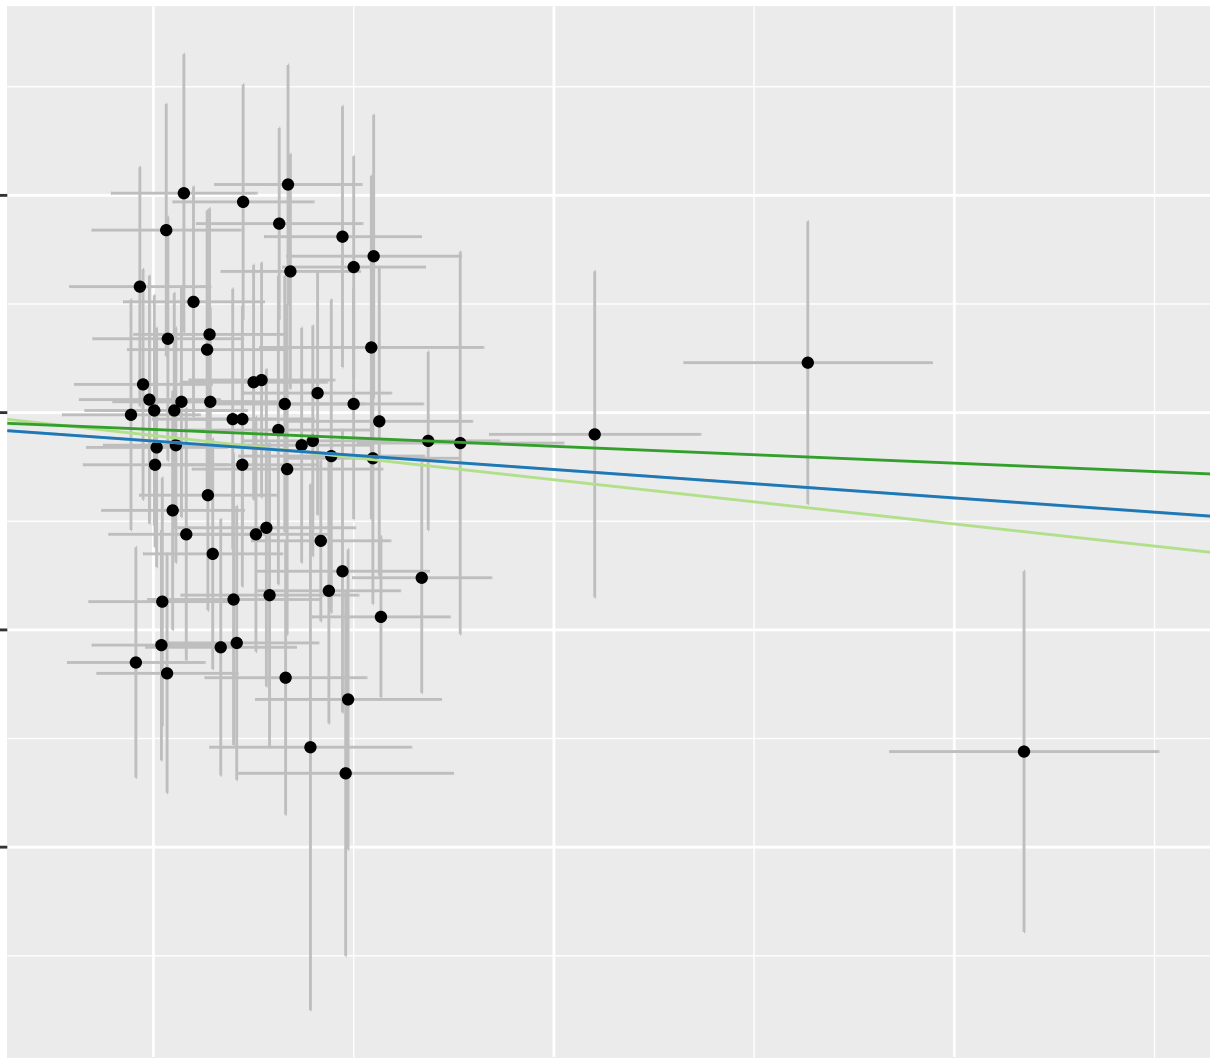

# MR Test

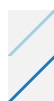

Inverse variance weighted

Maximum likelihood

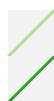

MR Egger

Weighted median

SNP effect on Triglycerides || id:ebi-a-GCST002216

0.04

0.02

0.00

0.05

0.10

0.15

SNP effect on SCZ\_PGC3

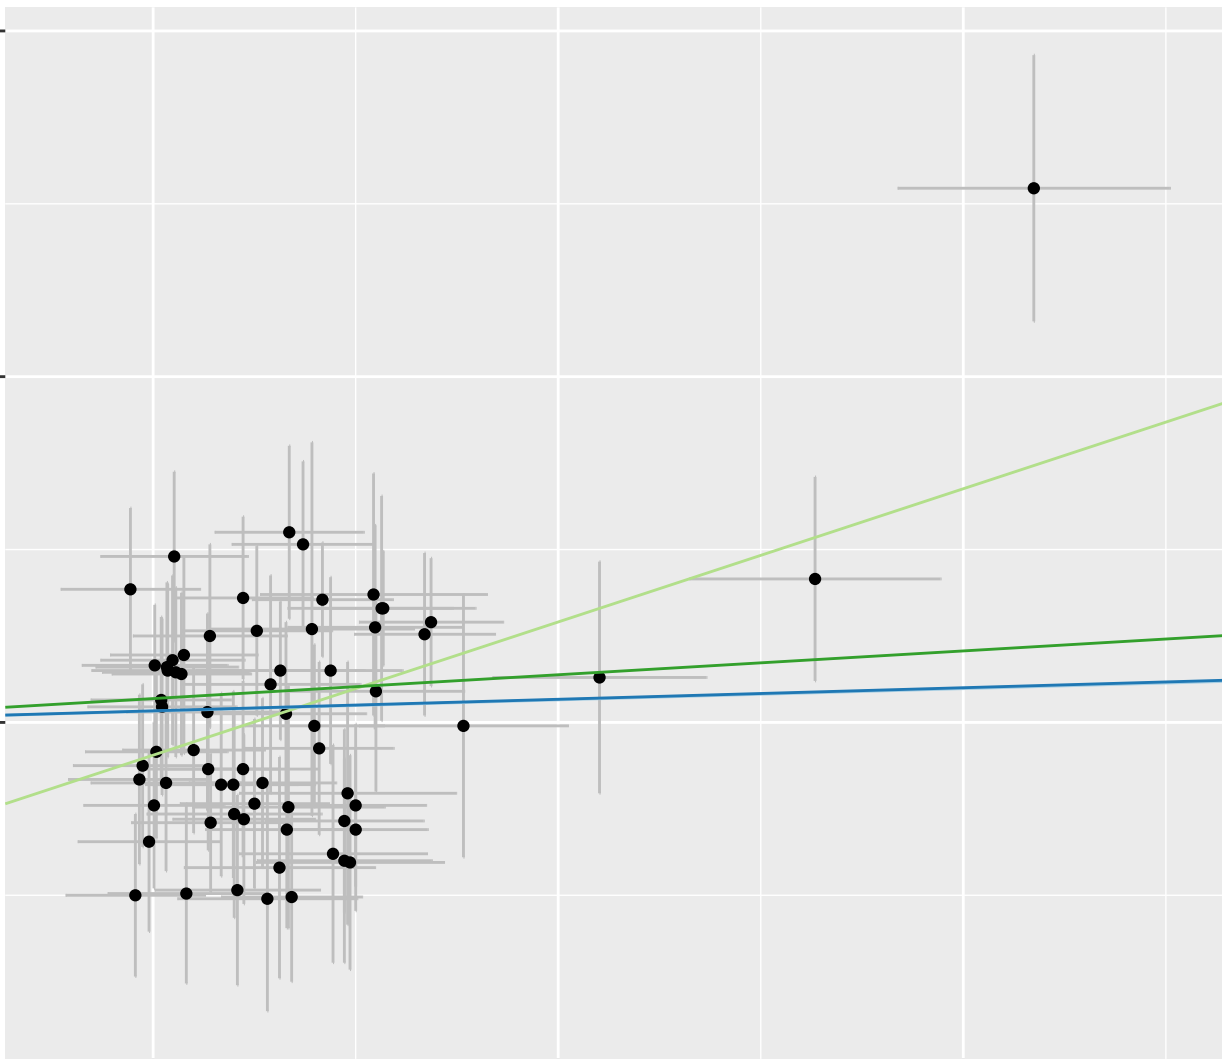

# MR Test

- Inverse variance weighted
- Maximum likelihood
- MR Egger
- Weighted median

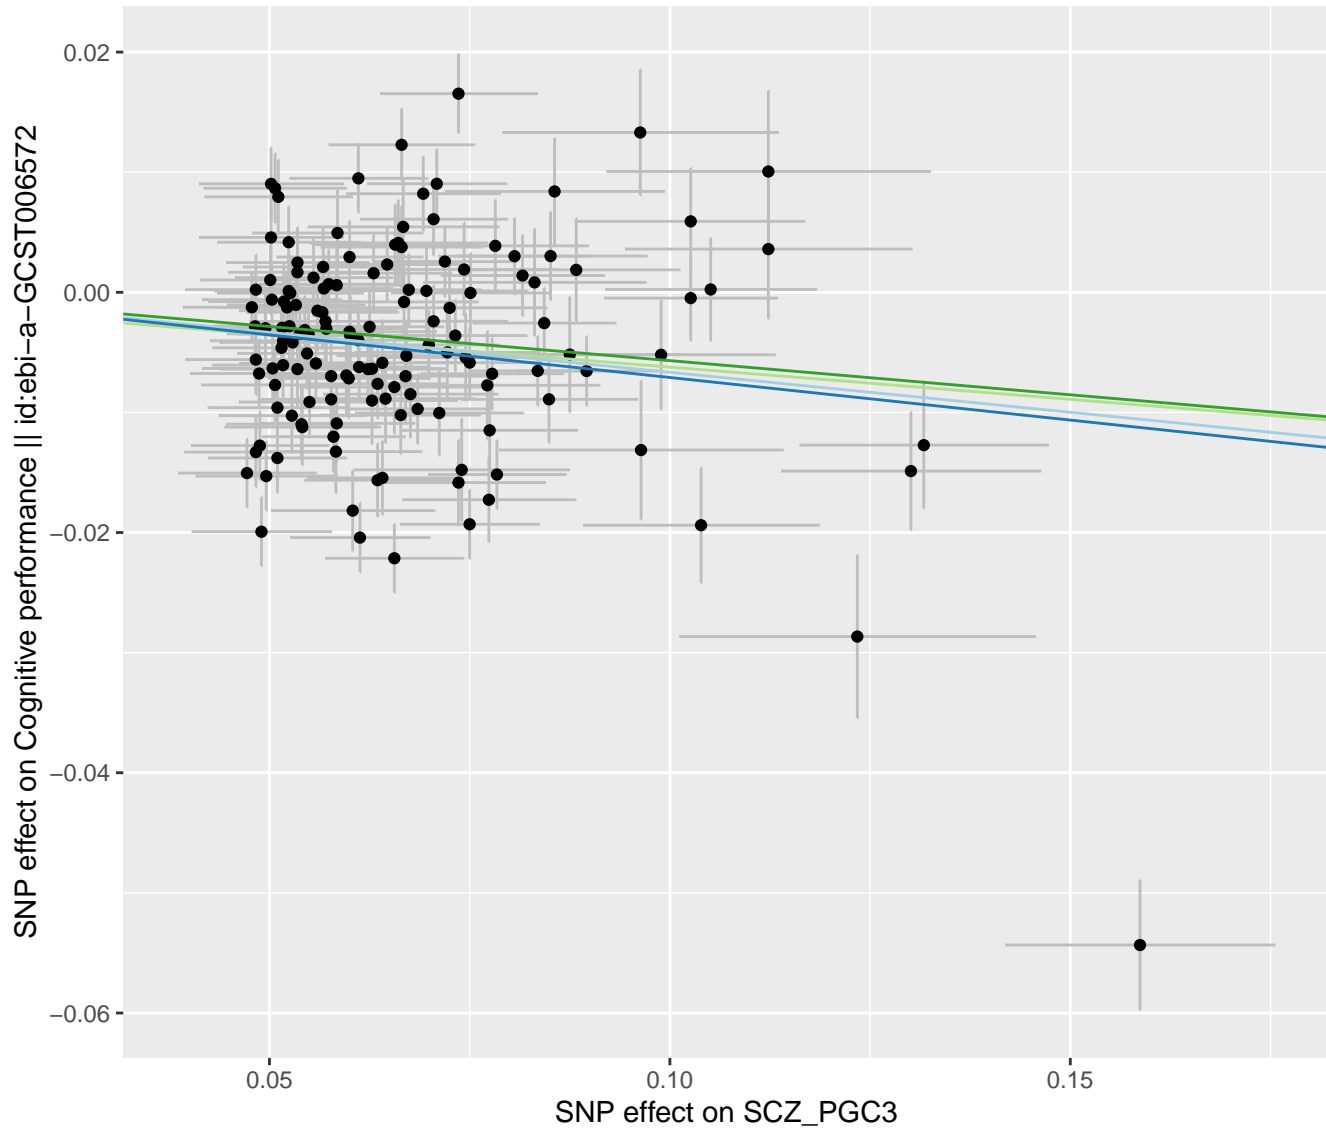

# MR Test

- Inverse variance weighted
- Maximum likelihood
- MR Egger
- Weighted median

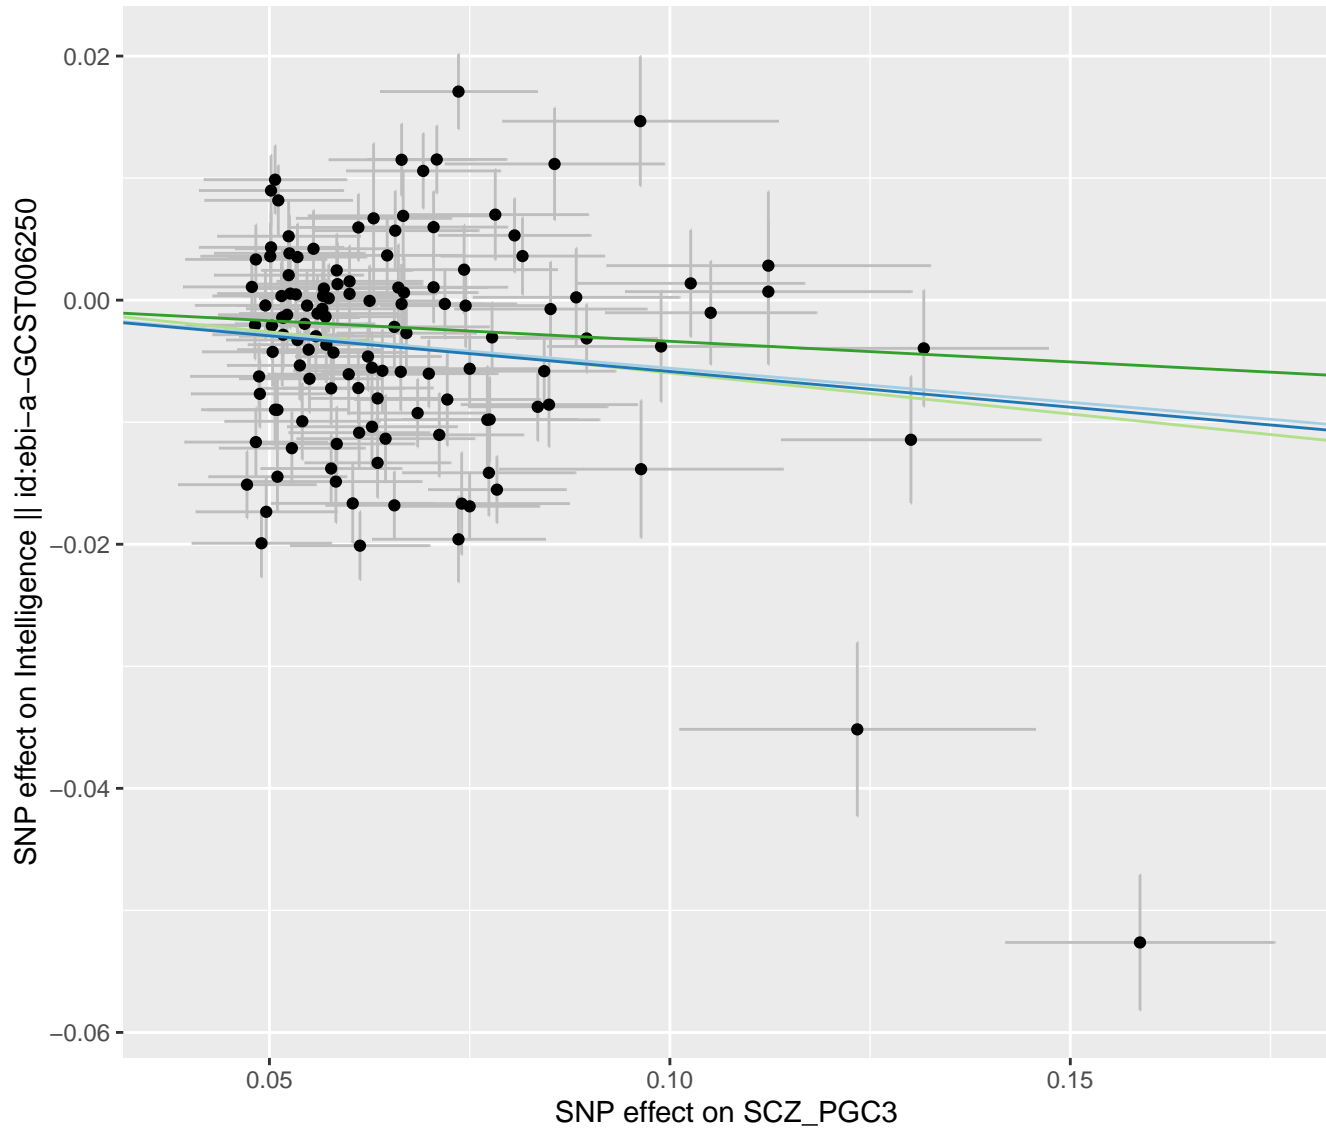

# MR Test

- Inverse variance weighted
- Maximum likelihood
- MR Egger
- Weighted median

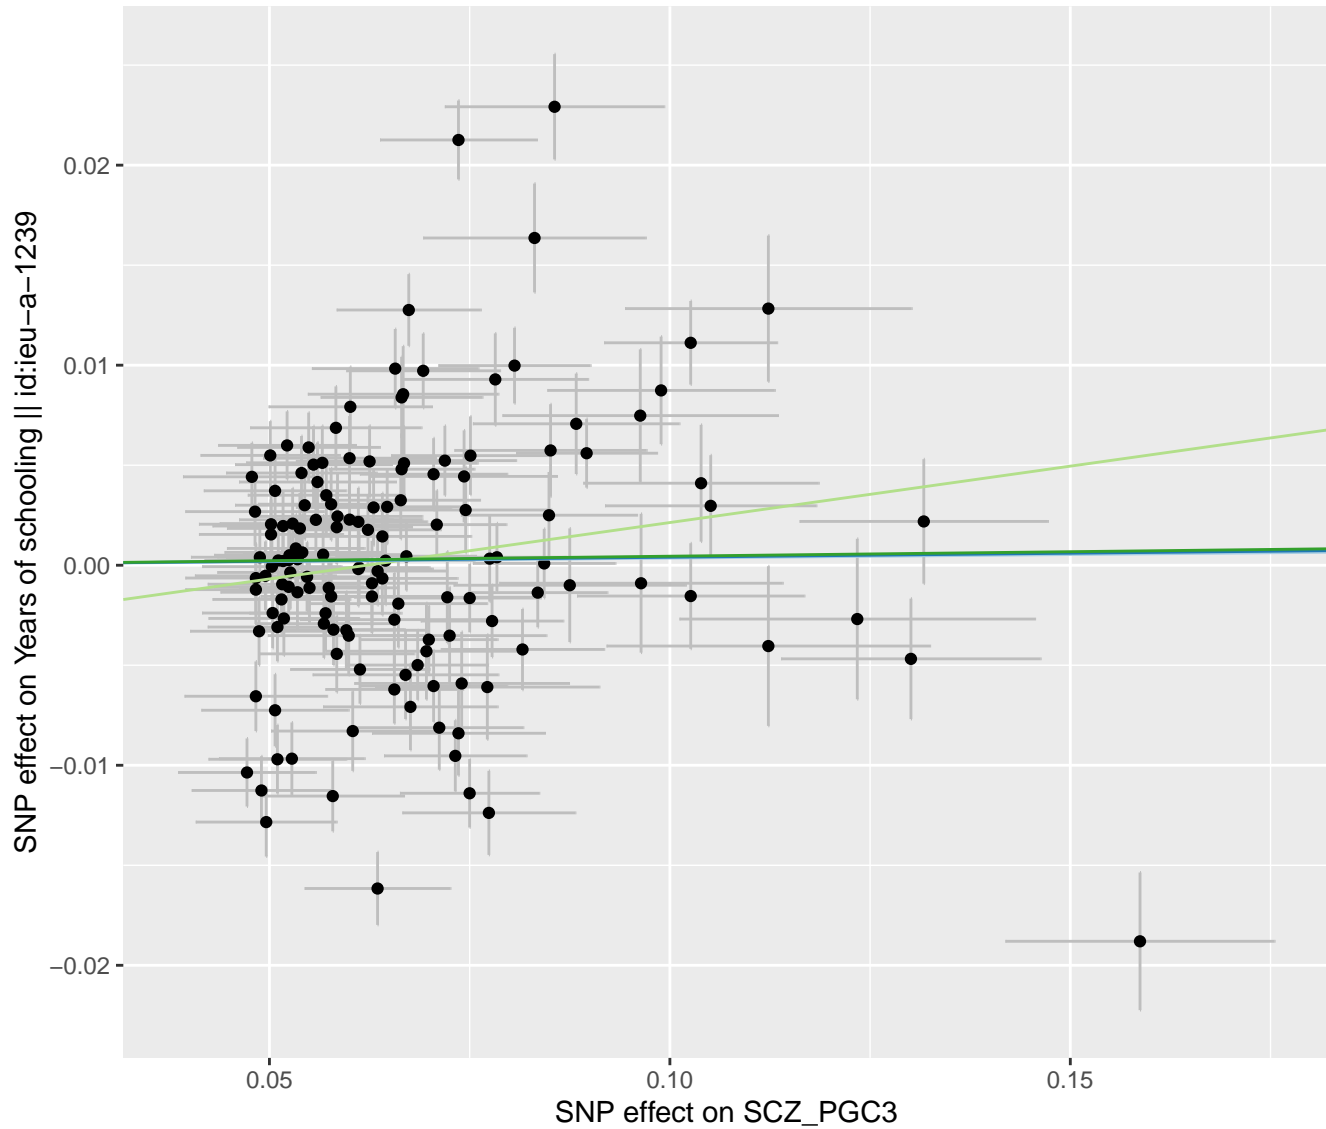

# MR Test

- Inverse variance weighted
- Maximum likelihood
- MR Egger
- Weighted median

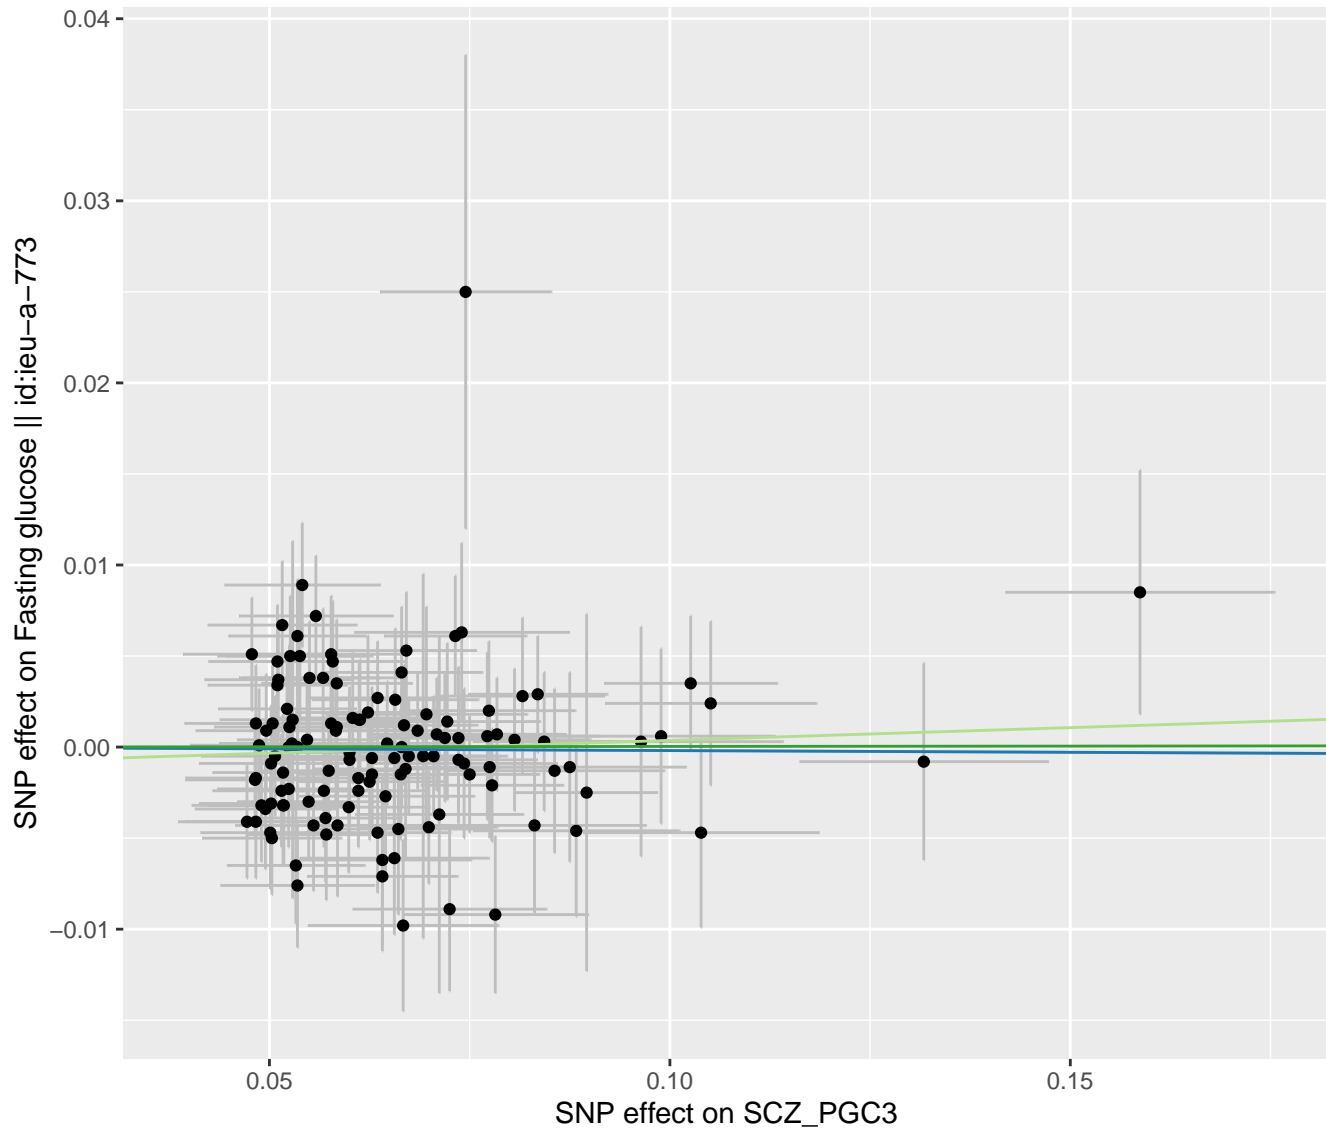

# MR Test

- Inverse variance weighted
- Maximum likelihood
- MR Egger
- Weighted median

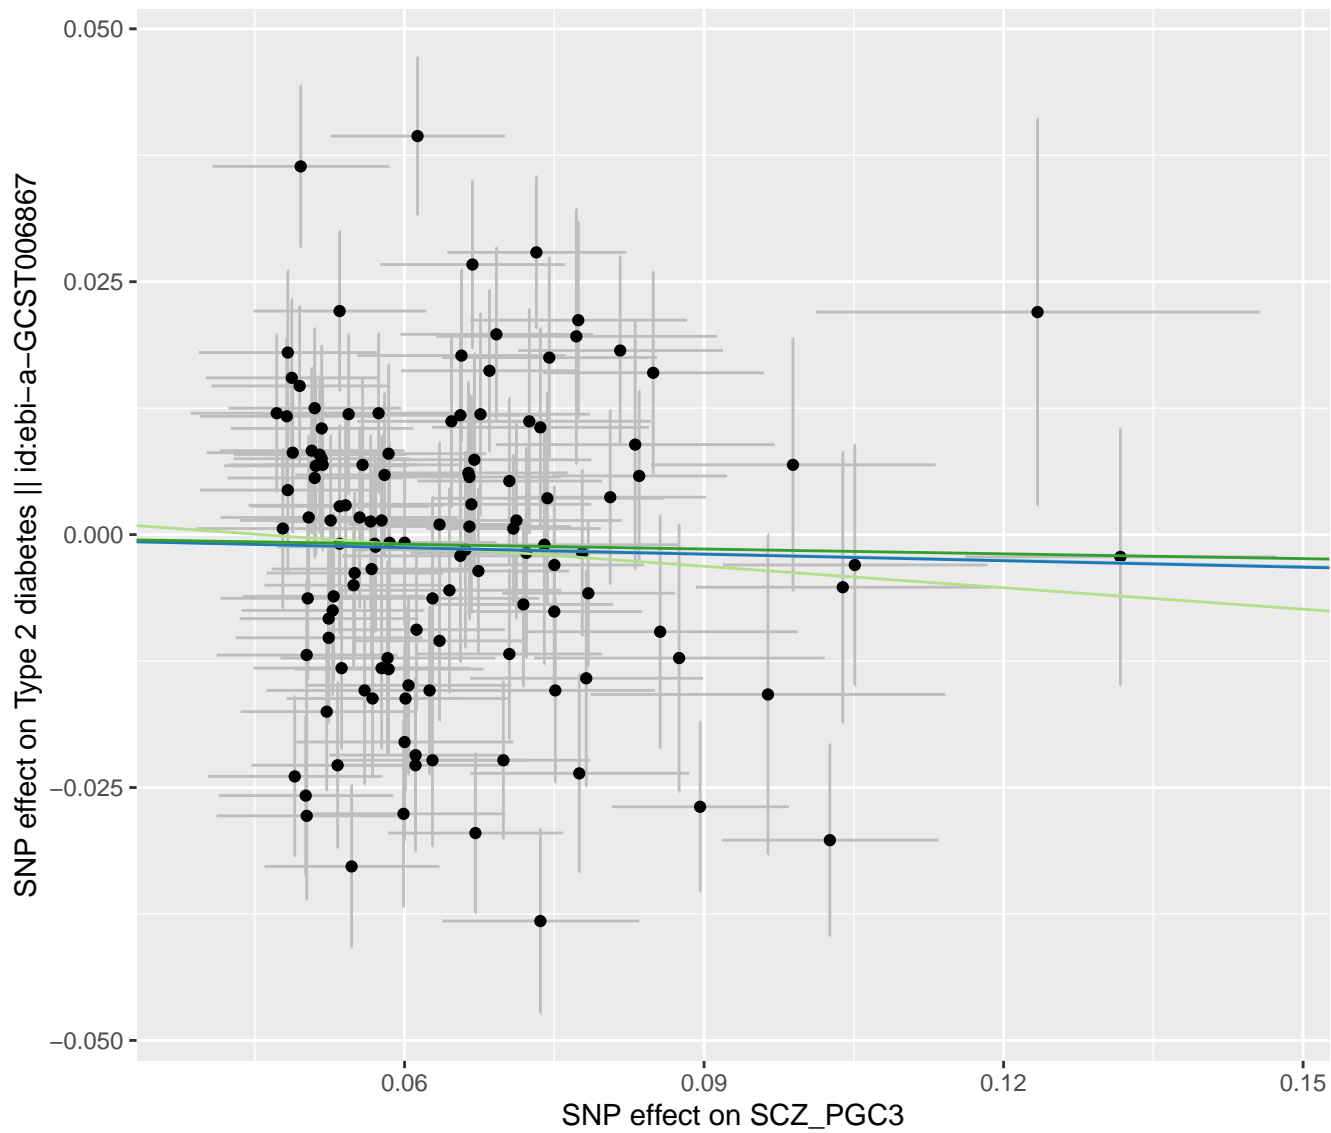



# MR Test

- Inverse variance weighted
- Maximum likelihood
- MR Egger
- Weighted median

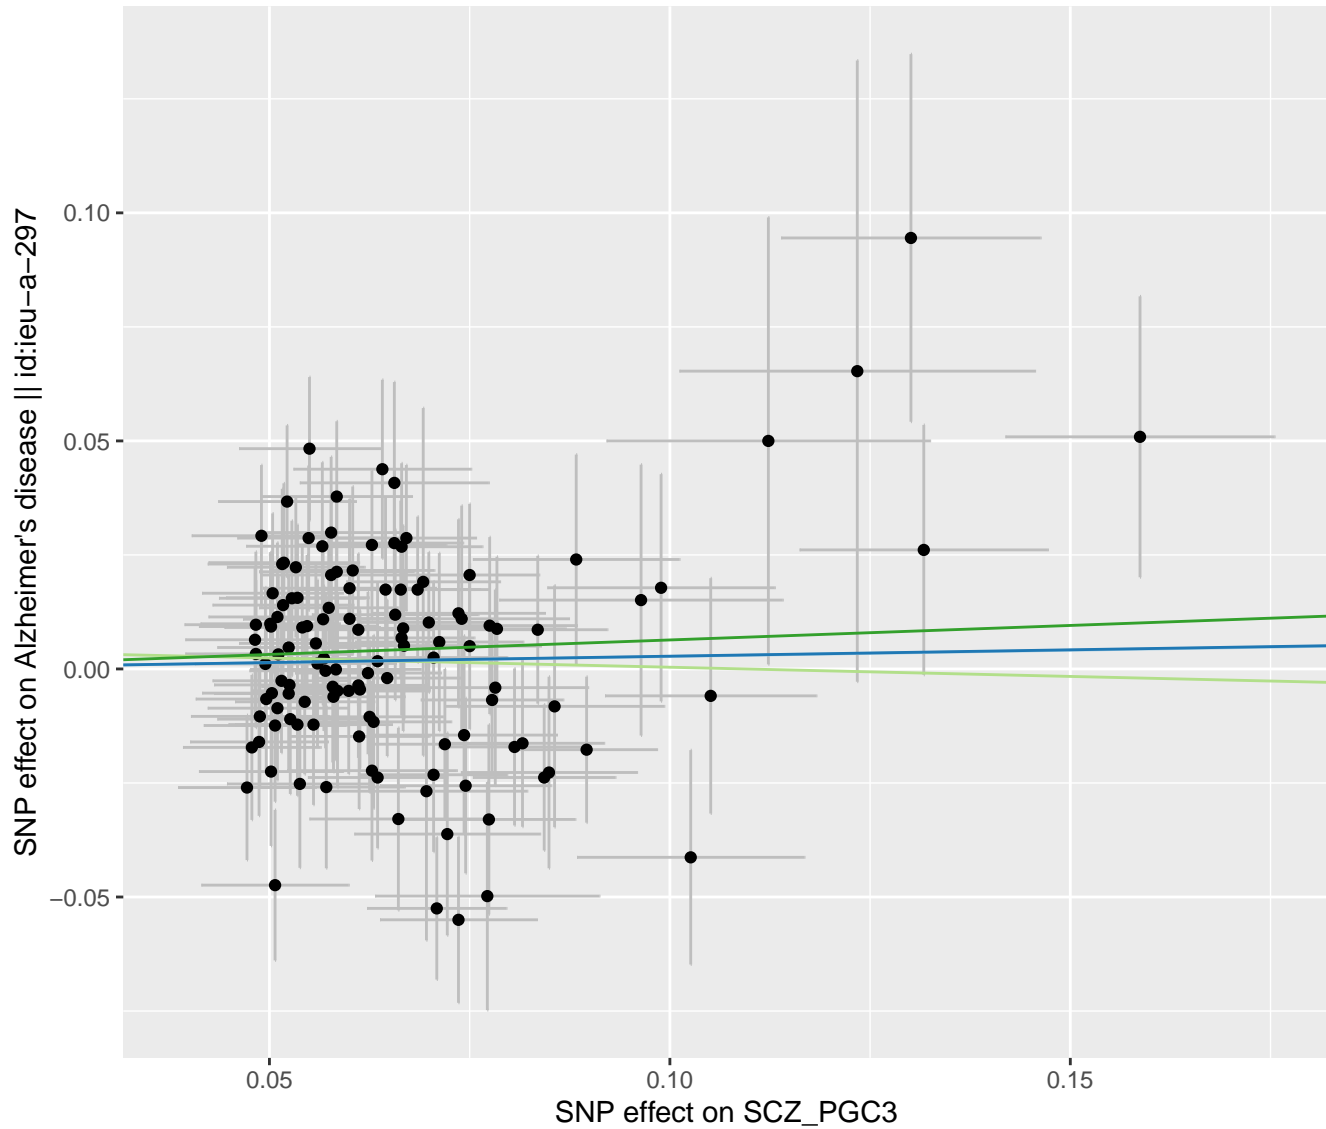

# MR Test

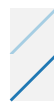

Inverse variance weighted

Maximum likelihood

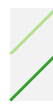

MR Egger

Weighted median

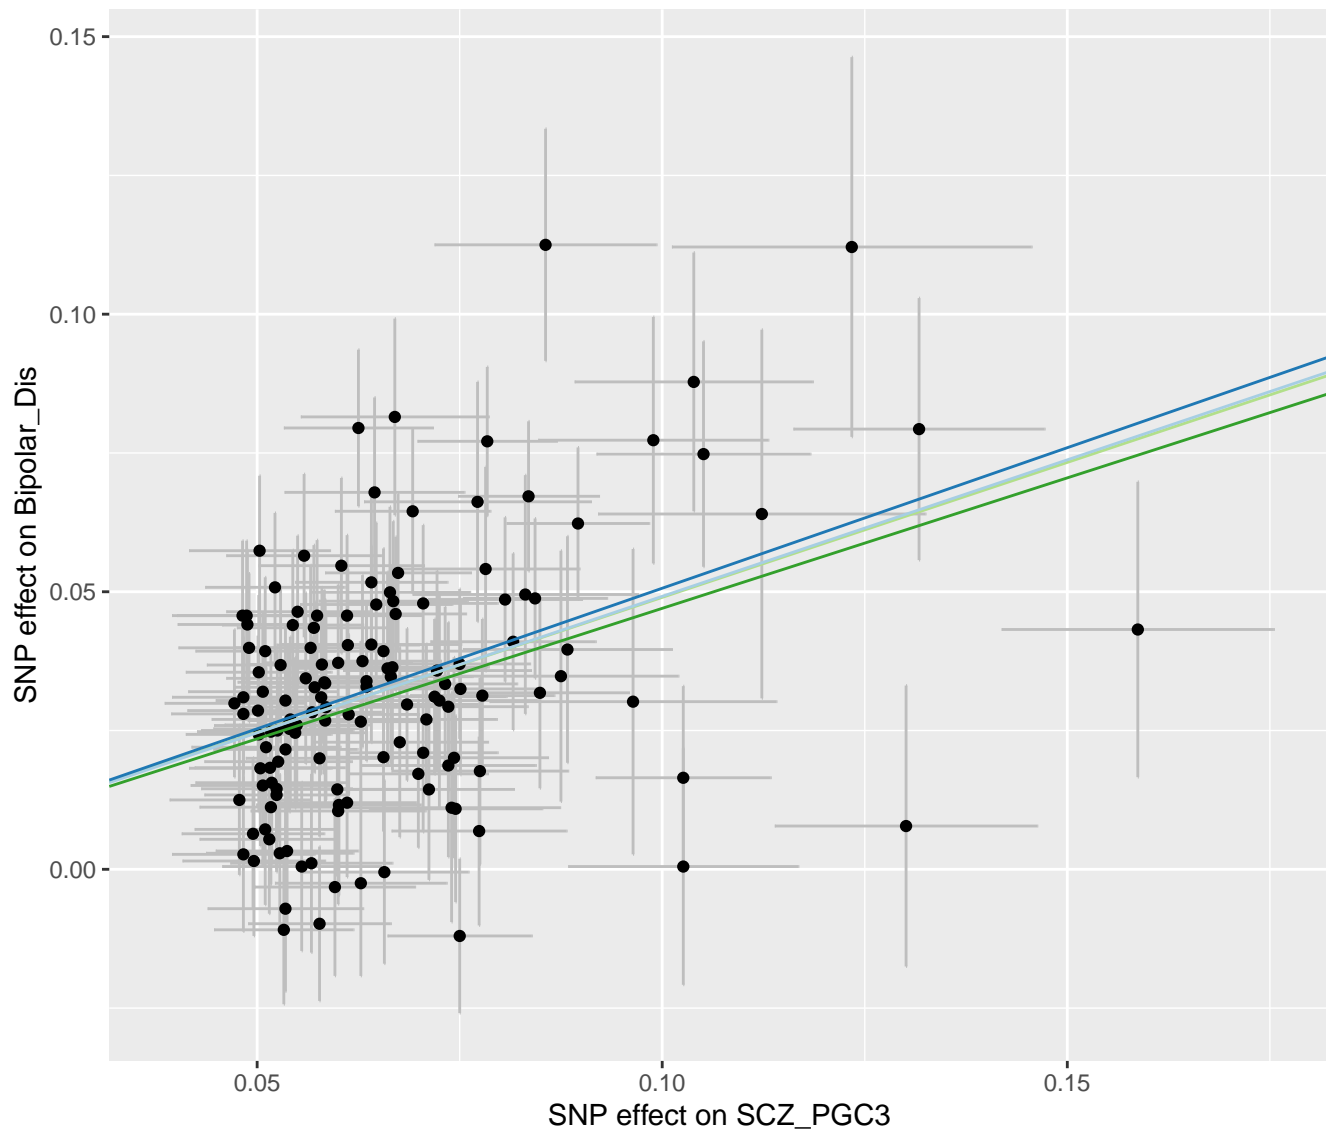

# MR Test

- Inverse variance weighted
- Maximum likelihood
- MR Egger
- Weighted median

SNP effect on Depressed affect || id:ebi-a-GCST006475

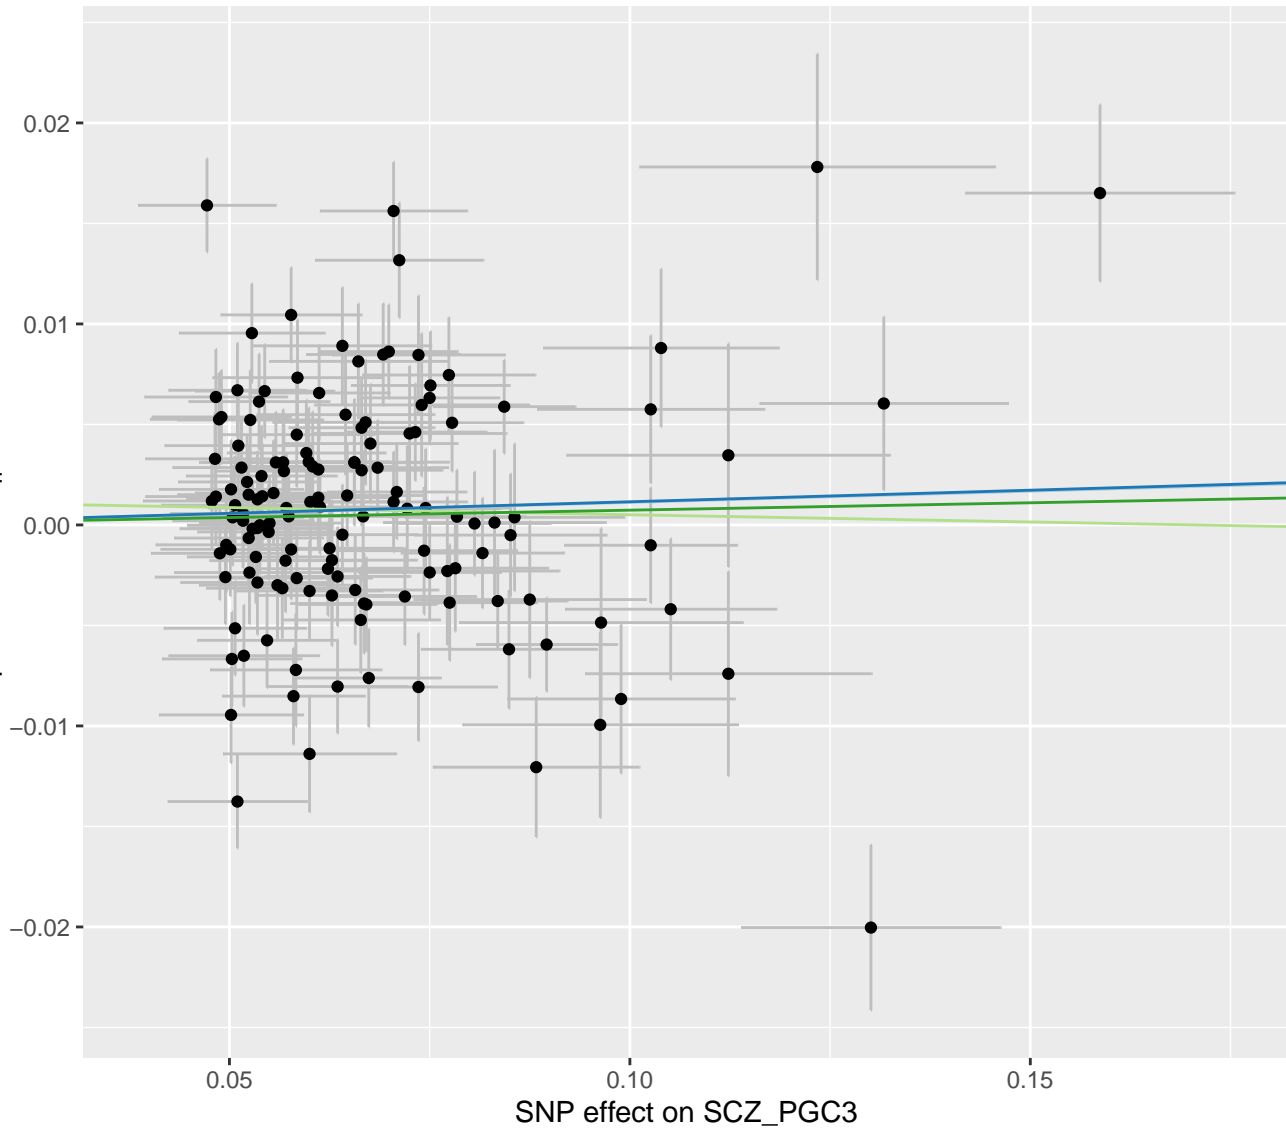

SNP effect on Depression (broad) || id:ebi-a-GCST005902

MR Test

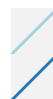

Inverse variance weighted

Maximum likelihood

MR Egger

Weighted median

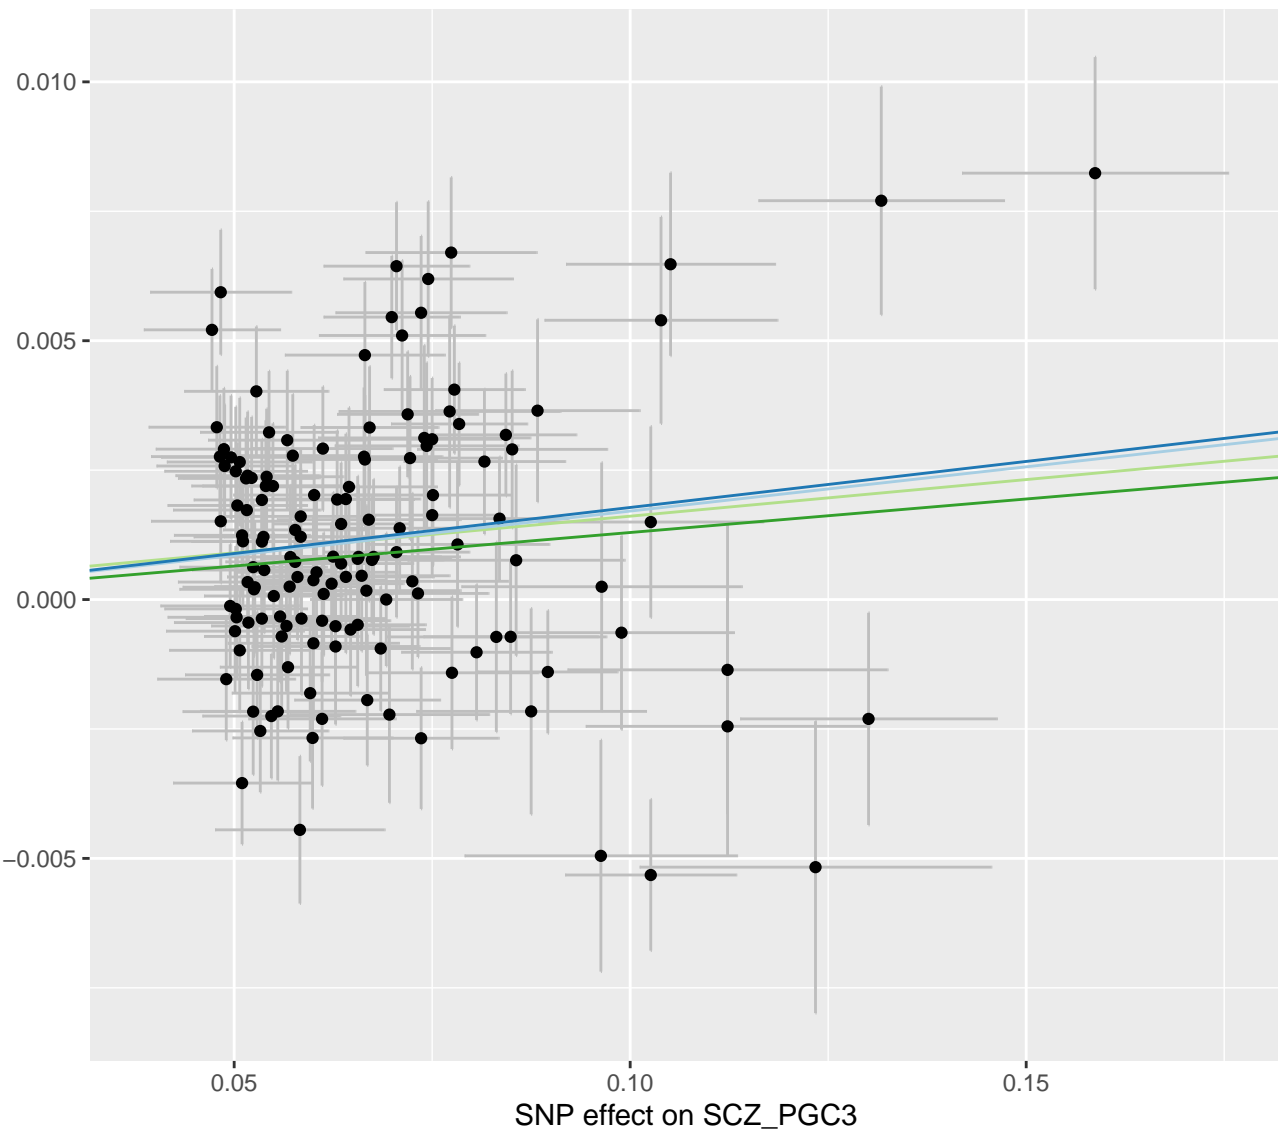

# MR Test

- Inverse variance weighted
- Maximum likelihood
- MR Egger
- Weighted median

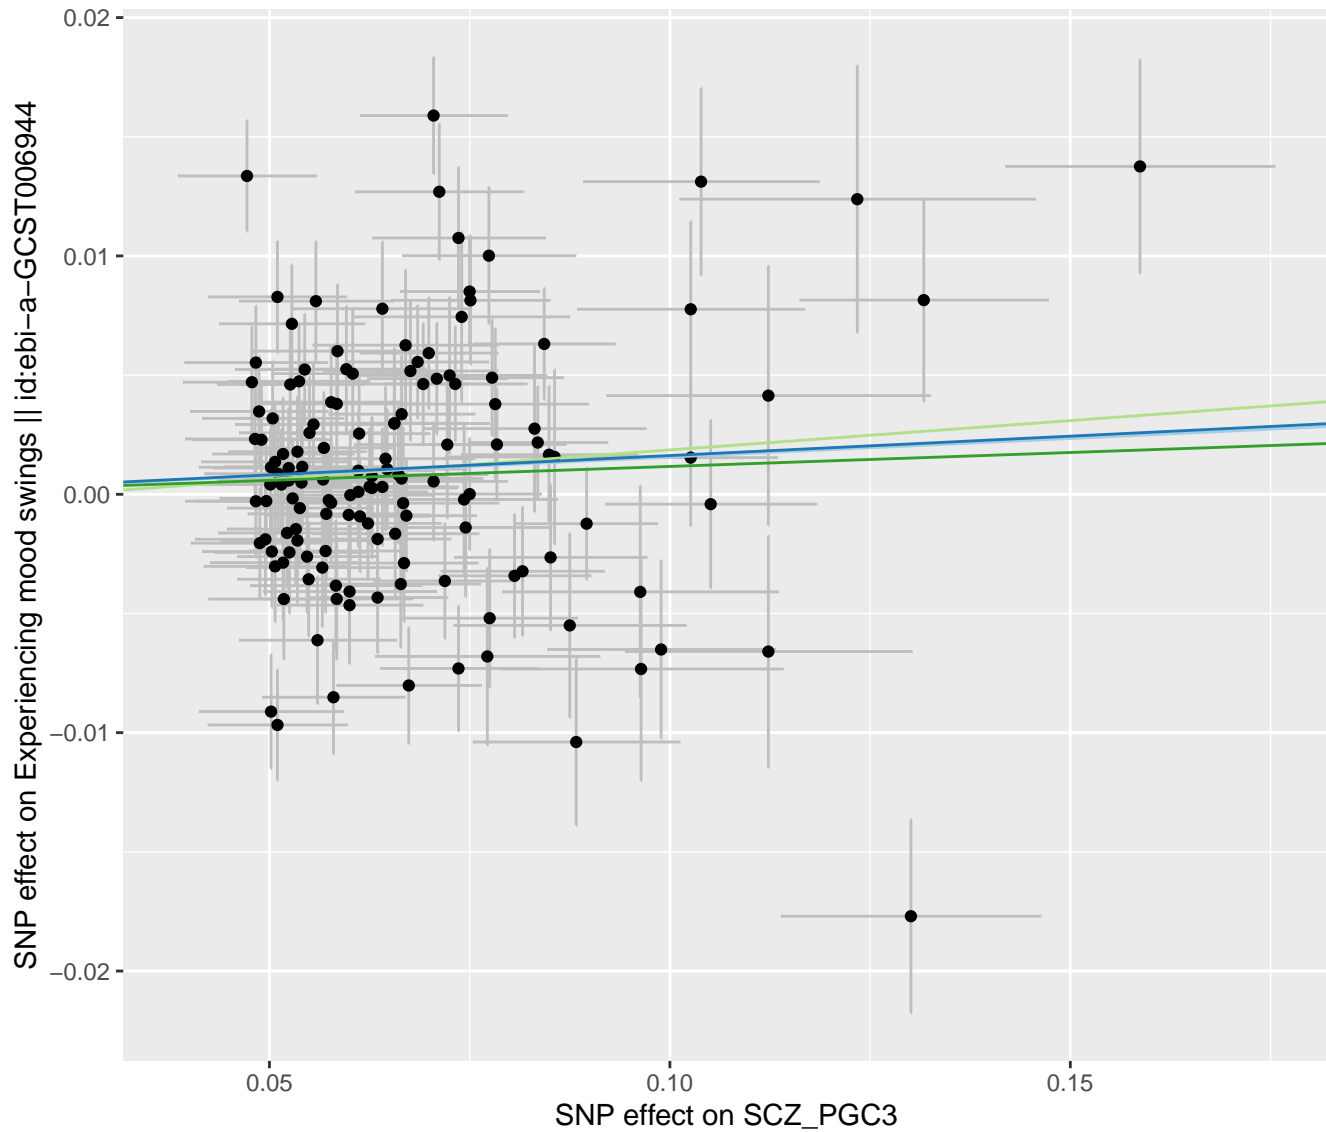

# MR Test

- Inverse variance weighted
- Maximum likelihood
- MR Egger
- Weighted median

SNP effect on Feeling fed-up || id:ebi-a-GCST006947

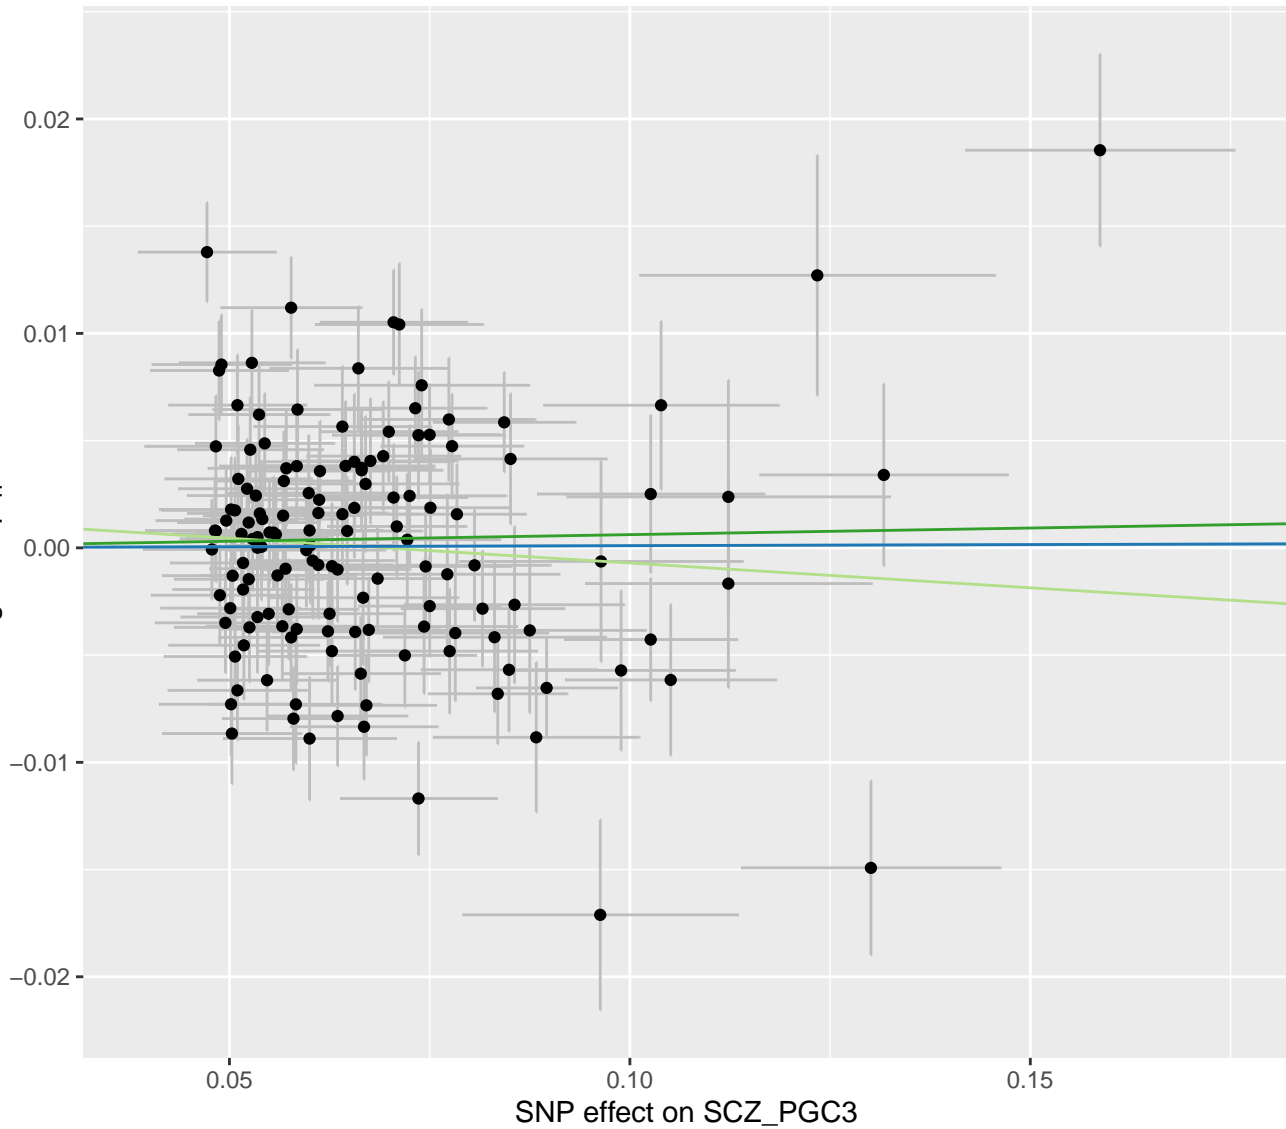

# MR Test

- Inverse variance weighted
- Maximum likelihood
- MR Egger
- Weighted median

SNP effect on Feeling guilty || id:ebi-a-GCST006945

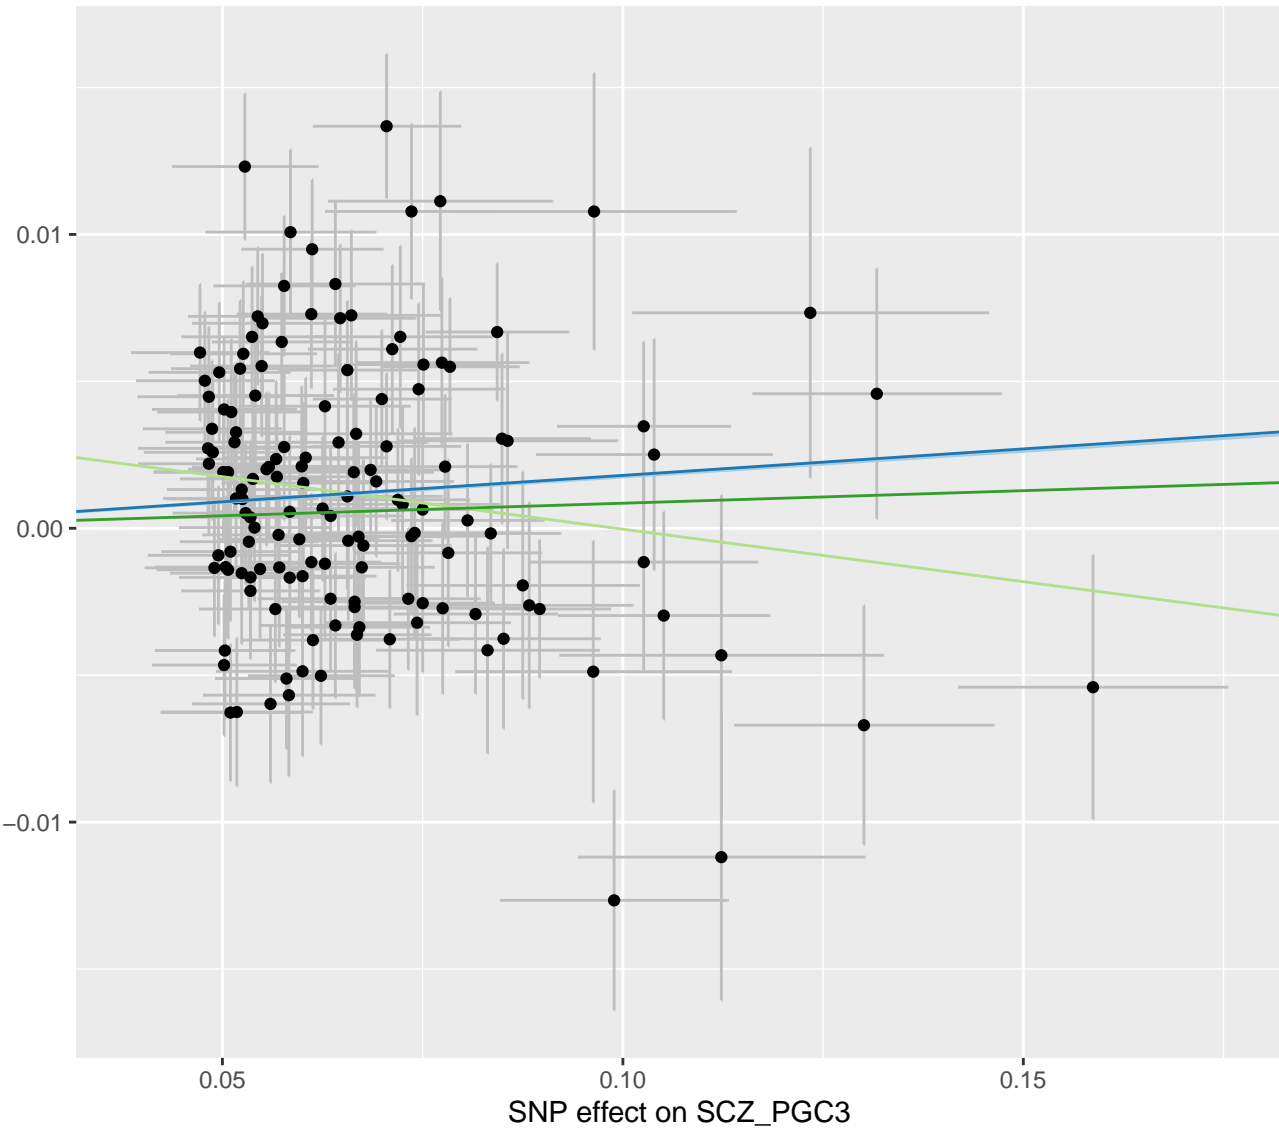

# MR Test

- Inverse variance weighted
- Maximum likelihood
- MR Egger
- Weighted median

SNP effect on Feeling hurt || id:ebi-a-GCST006951

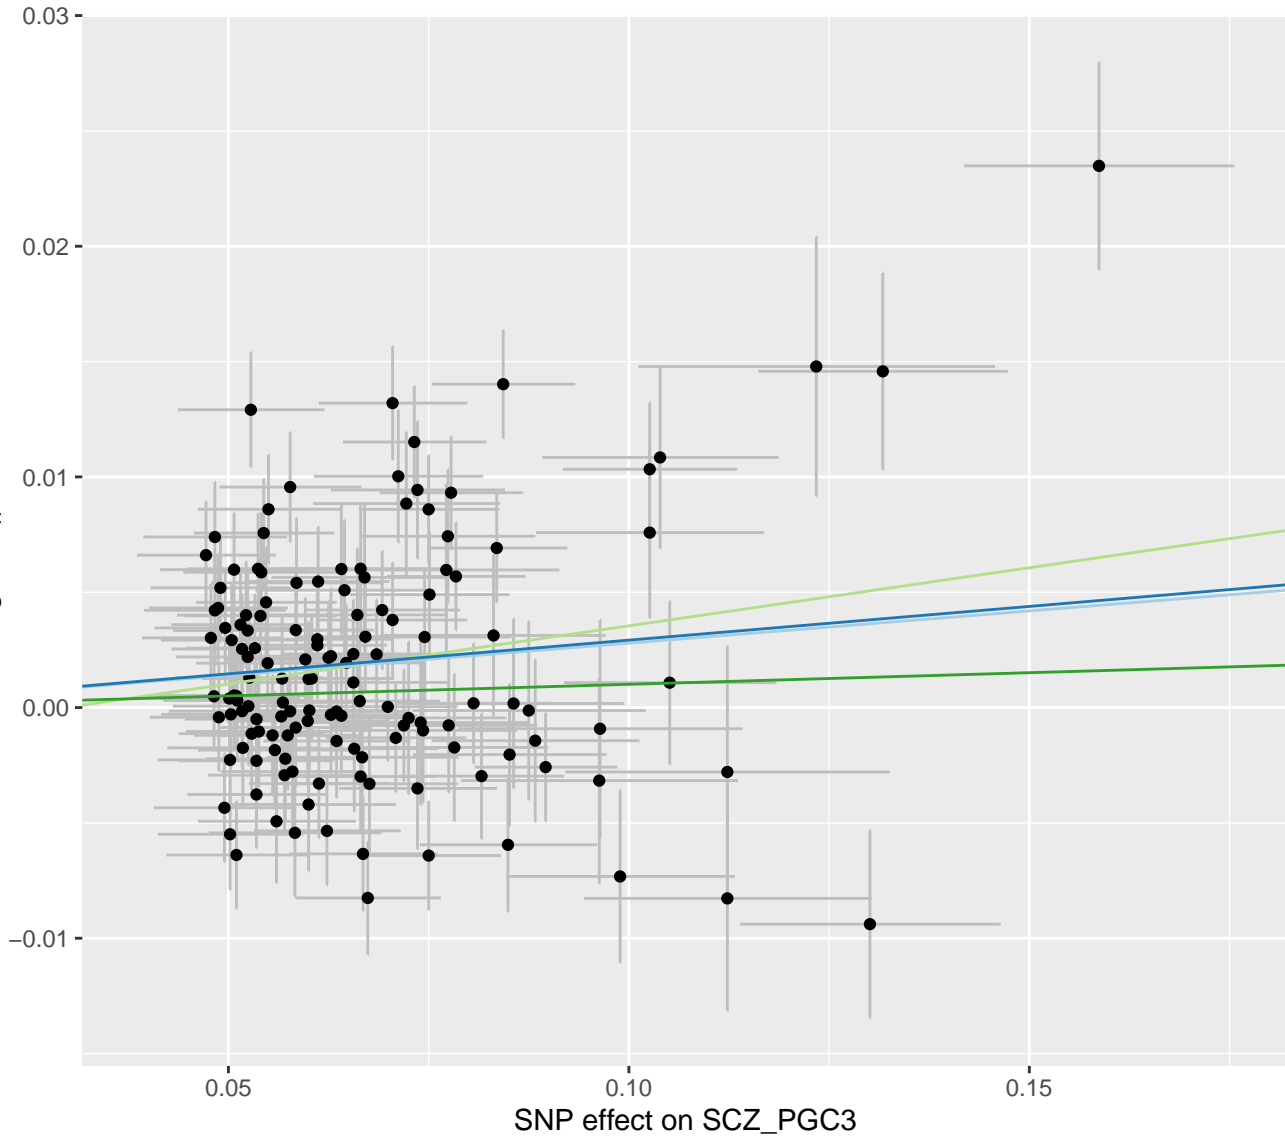



# MR Test

- Inverse variance weighted
- Maximum likelihood
- MR Egger
- Weighted median

SNP effect on Feeling miserable || id:ebi-a-GCST006943

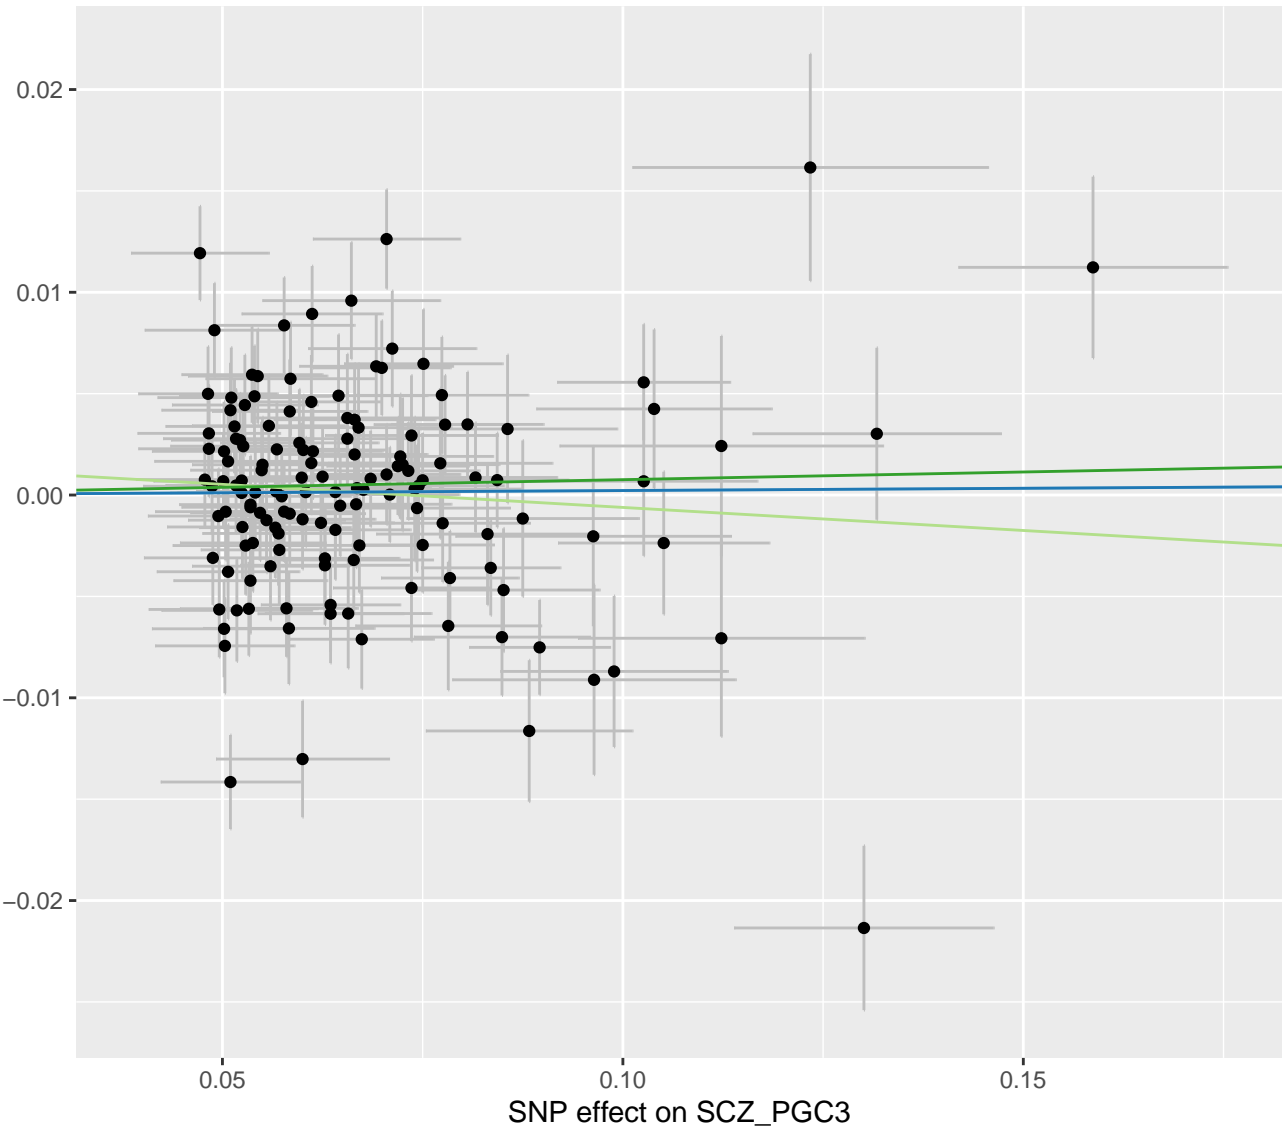

# MR Test

- Inverse variance weighted
- Maximum likelihood
- MR Egger
- Weighted median

SNP effect on Feeling nervous || id:ebi-a-GCST006948

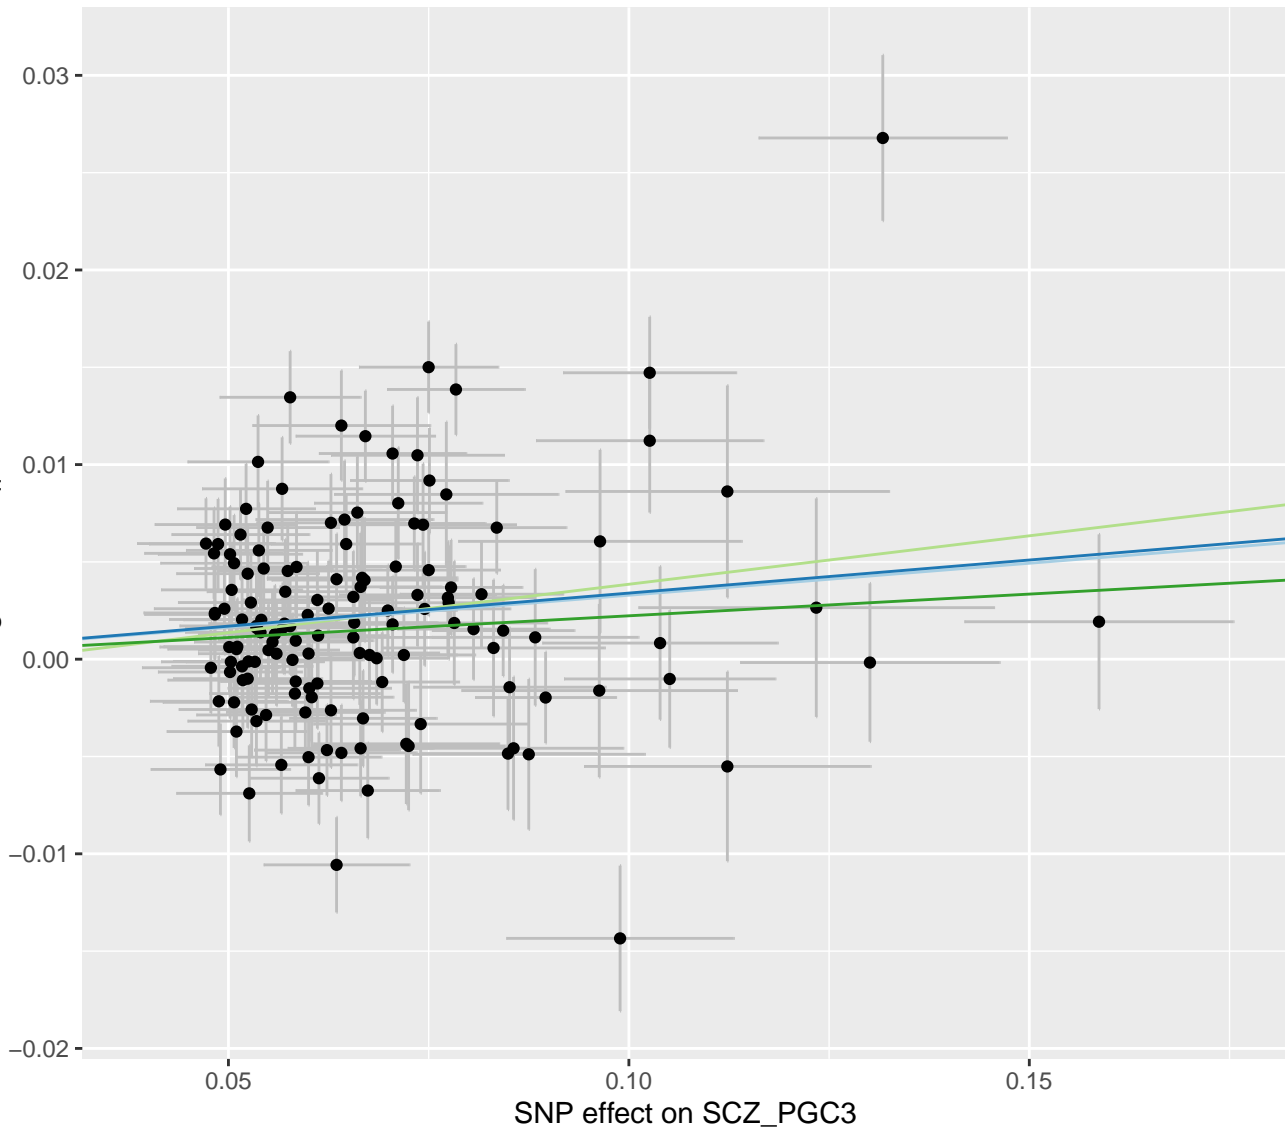

# MR Test

- Inverse variance weighted
- Maximum likelihood
- MR Egger
- Weighted median

SNP effect on Feeling tense || id:ebi-a-GCST006952

0.02  
0.01  
0.00  
-0.01

0.05

0.10

0.15

SNP effect on SCZ\_PGC3

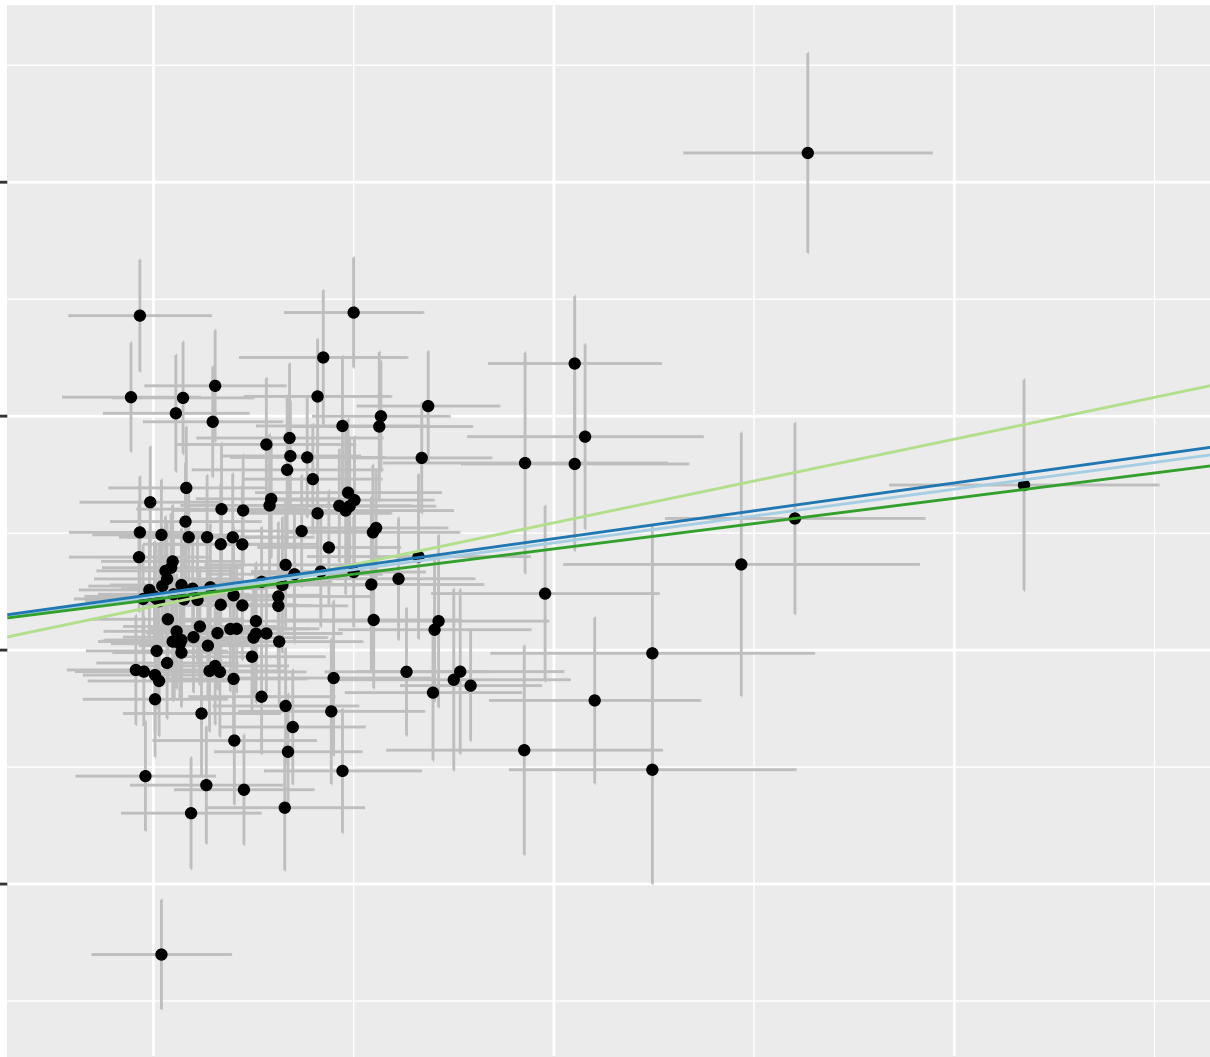

# MR Test

- Inverse variance weighted
- Maximum likelihood
- MR Egger
- Weighted median

SNP effect on Feeling worry || id:ebi-a-GCST0006950

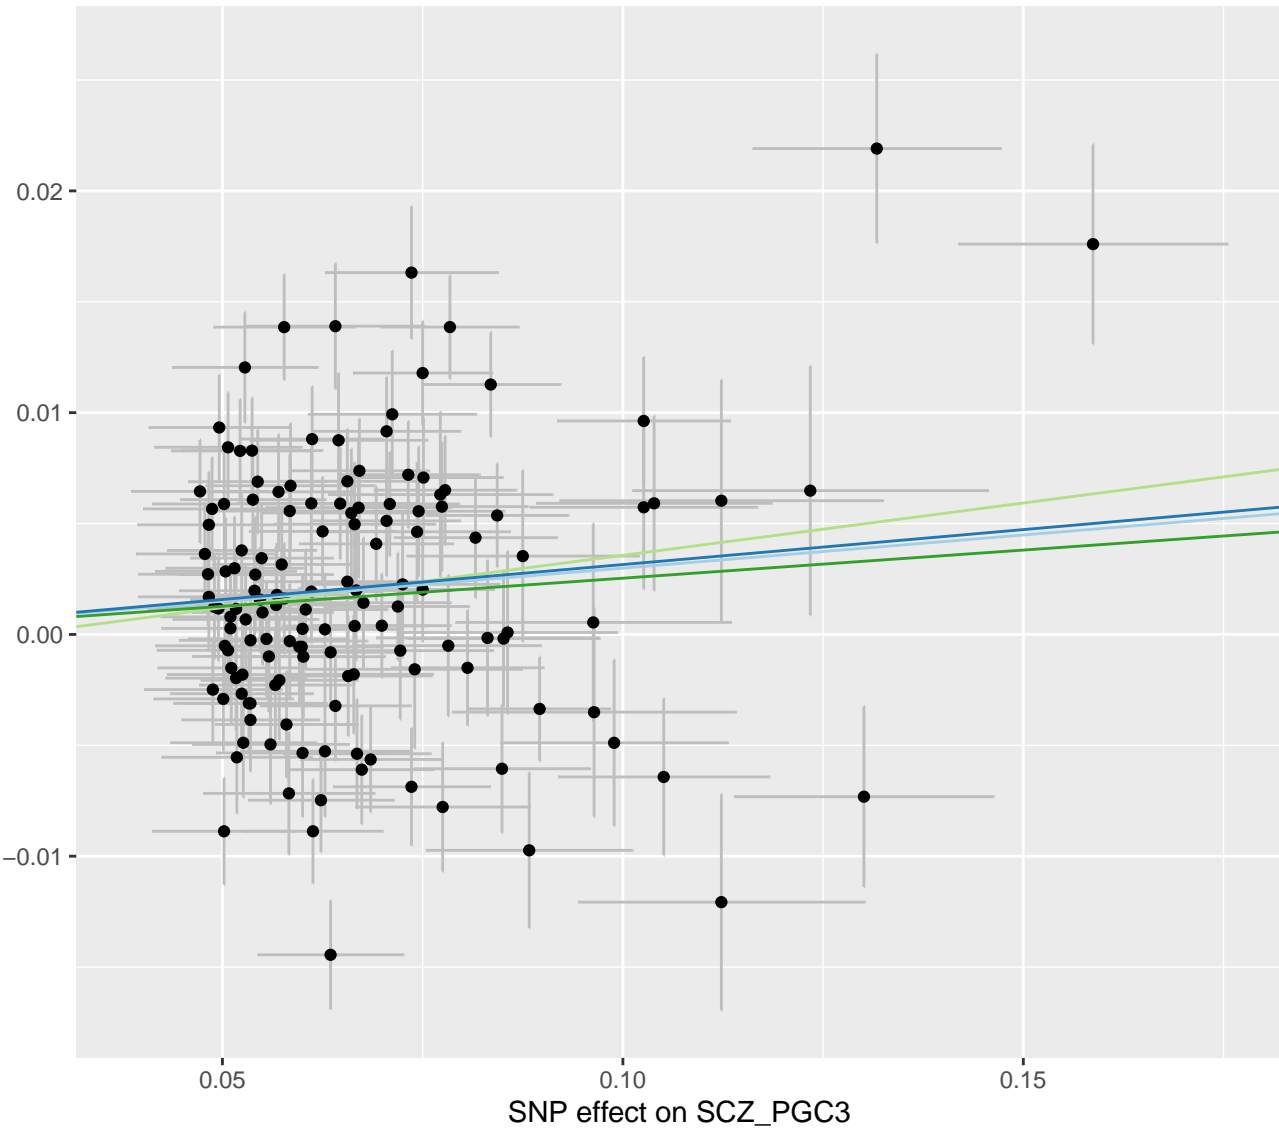

# MR Test

- Inverse variance weighted
- Maximum likelihood
- MR Egger
- Weighted median

SNP effect on Irritable mood || id:ebi-a-GCST006941

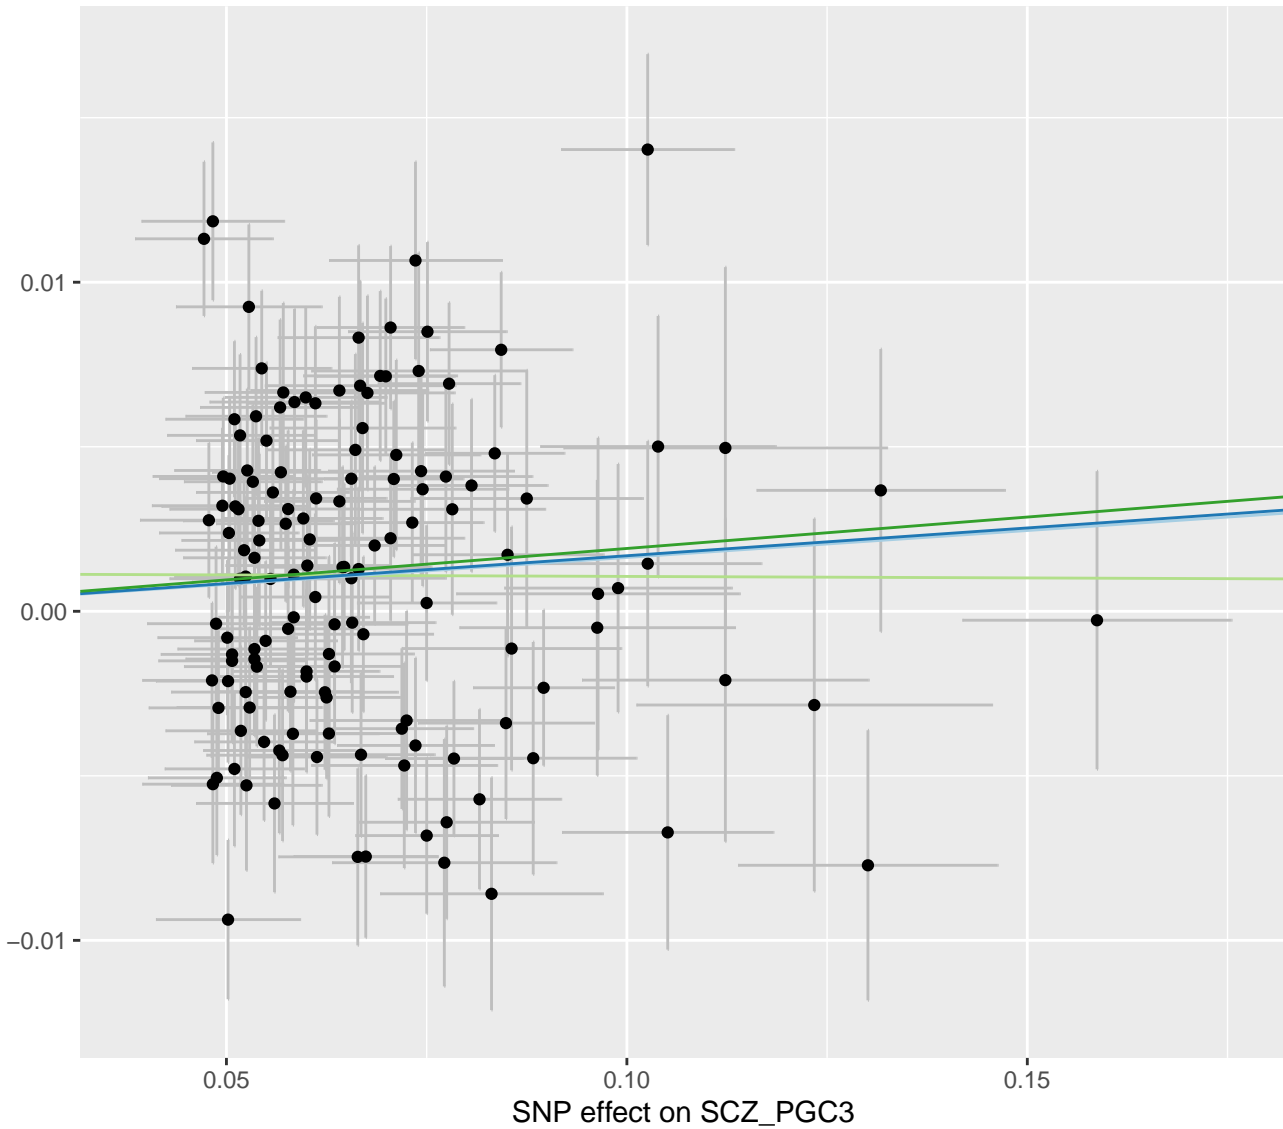

# MR Test

- Inverse variance weighted
- Maximum likelihood
- MR Egger
- Weighted median

SNP effect on Neuroticism || id:ebi-a-GCST006940

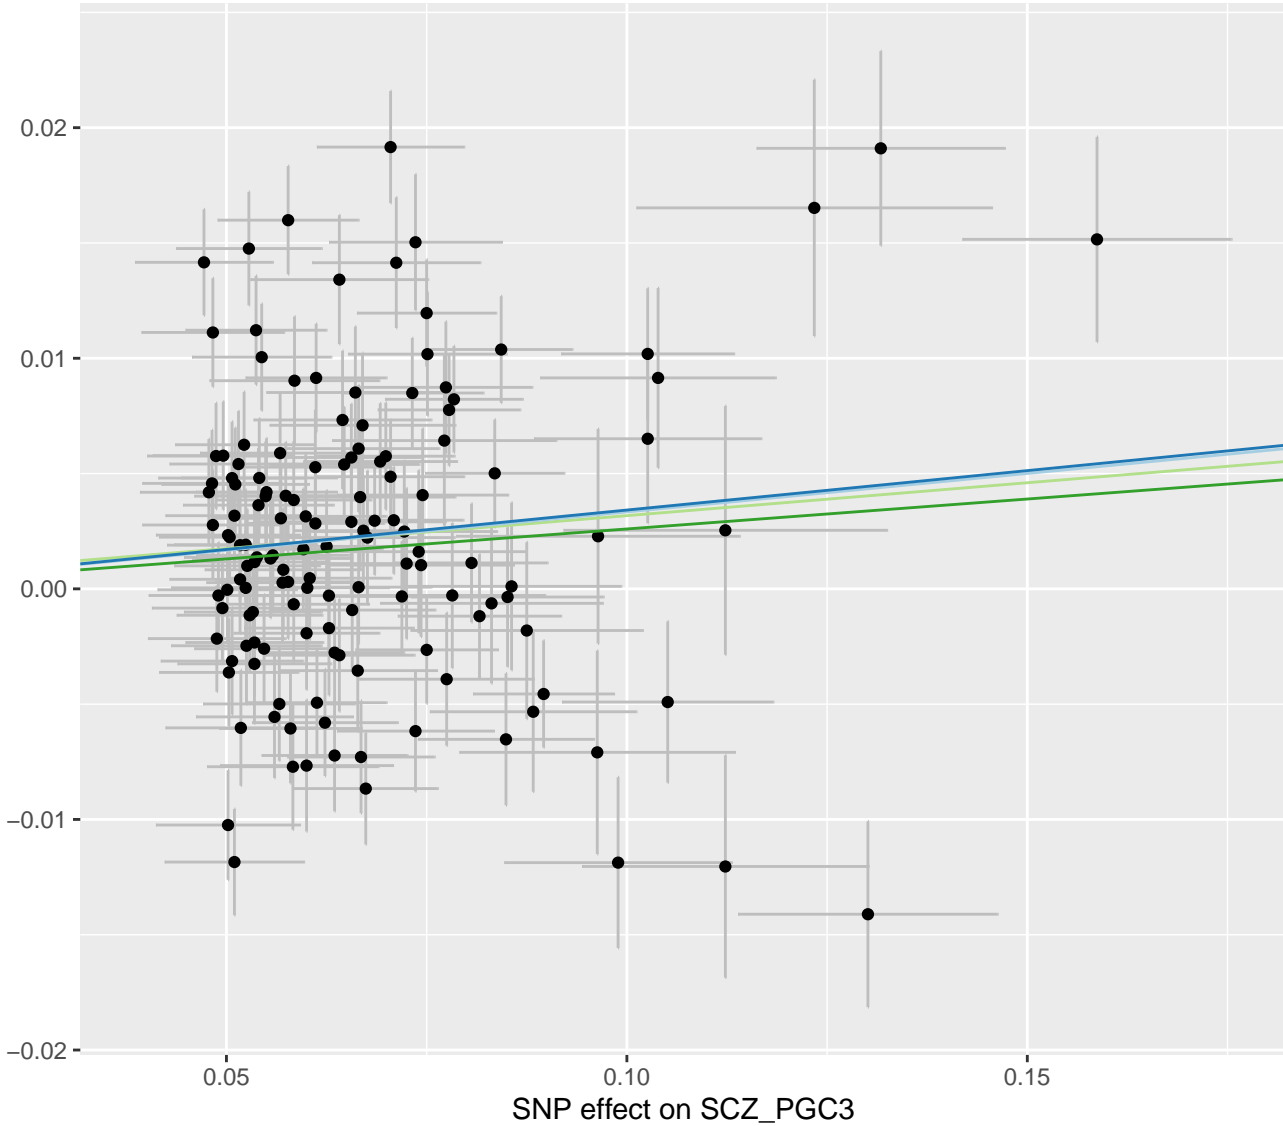

# MR Test

- Inverse variance weighted
- Maximum likelihood
- MR Egger
- Weighted median

SNP effect on Worry || id:ebi-a-GCST006478

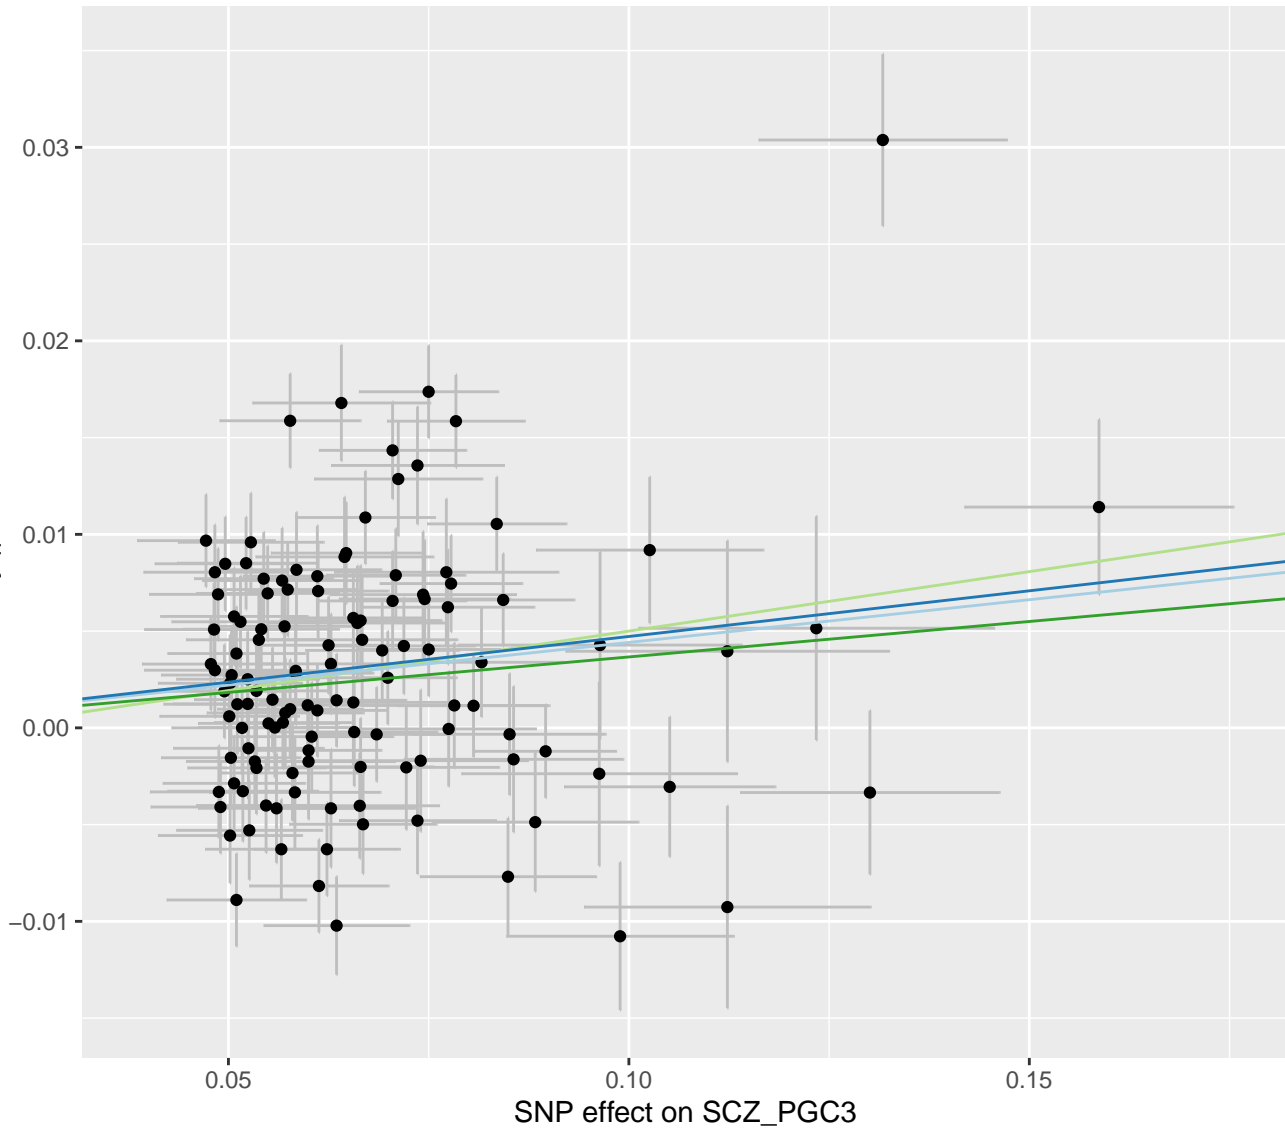

SNP effect on Worry too long after an embarrassing experience || id:ebi-a-GCST0006946

# MR Test

- Inverse variance weighted
- Maximum likelihood
- MR Egger
- Weighted median

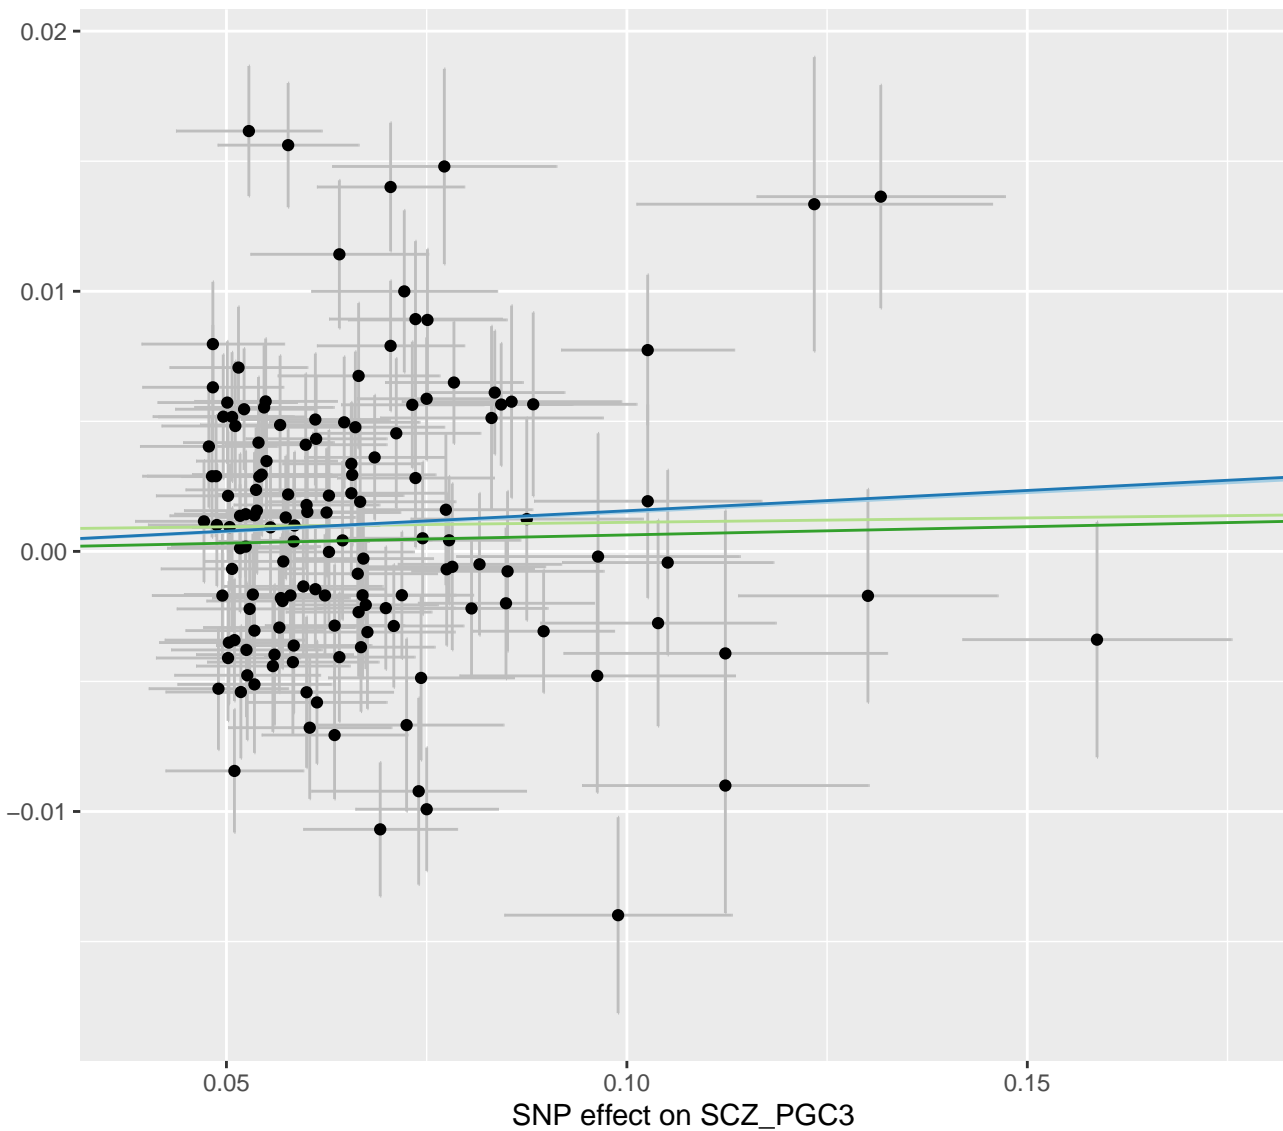



# MR Test

- Inverse variance weighted
- Maximum likelihood
- MR Egger
- Weighted median

SNP effect on Age at menarche || id:ieu-a-1095

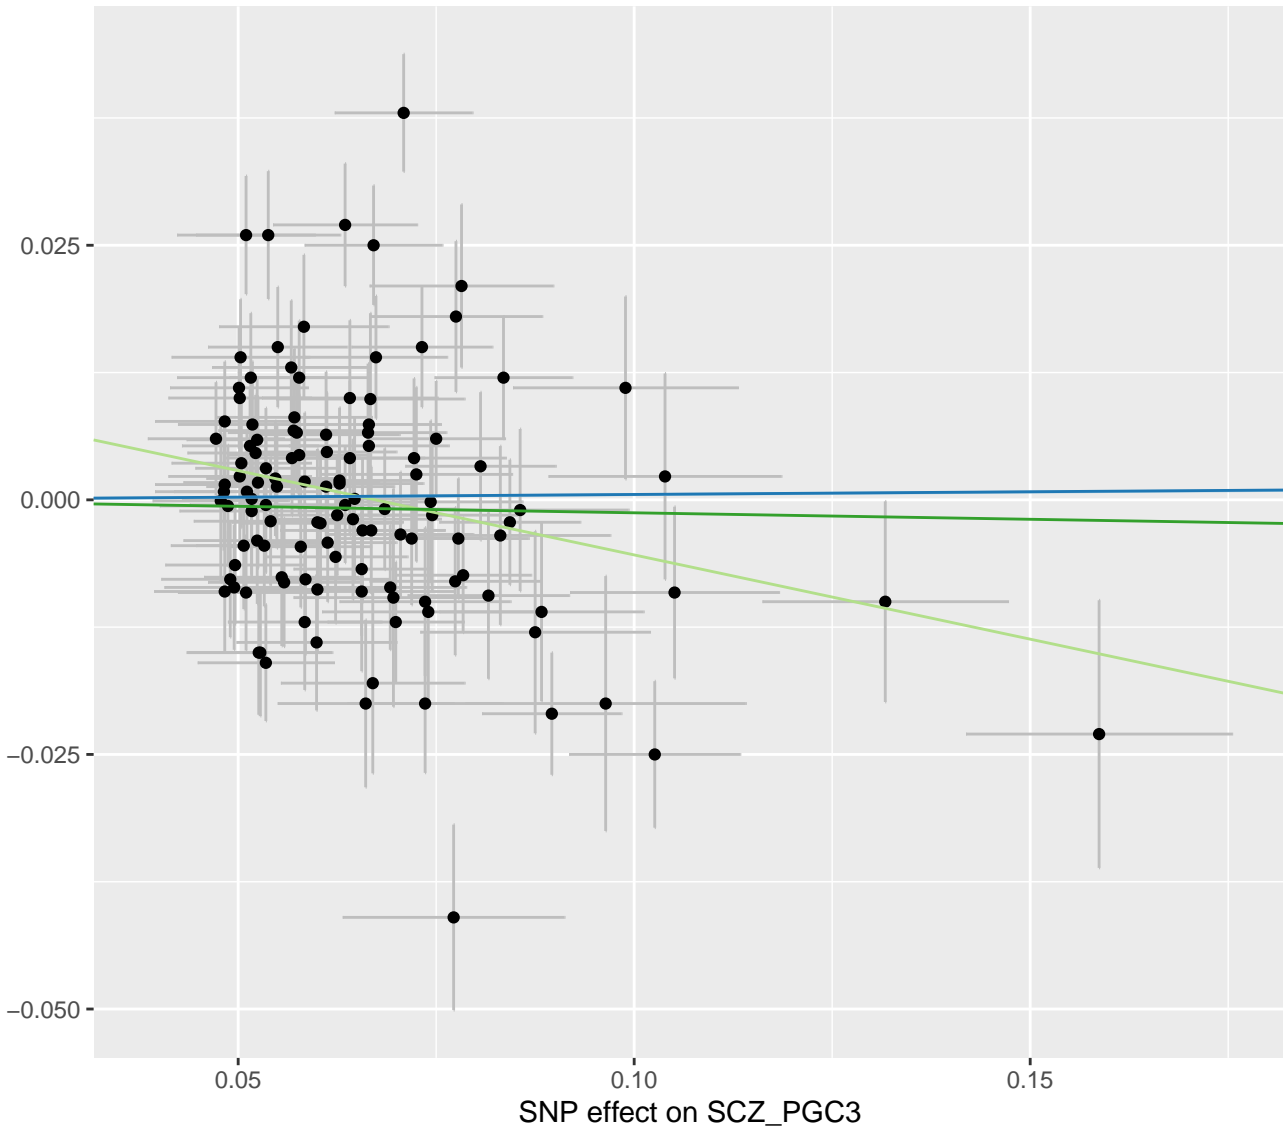

# MR Test

- Inverse variance weighted
- Maximum likelihood
- MR Egger
- Weighted median

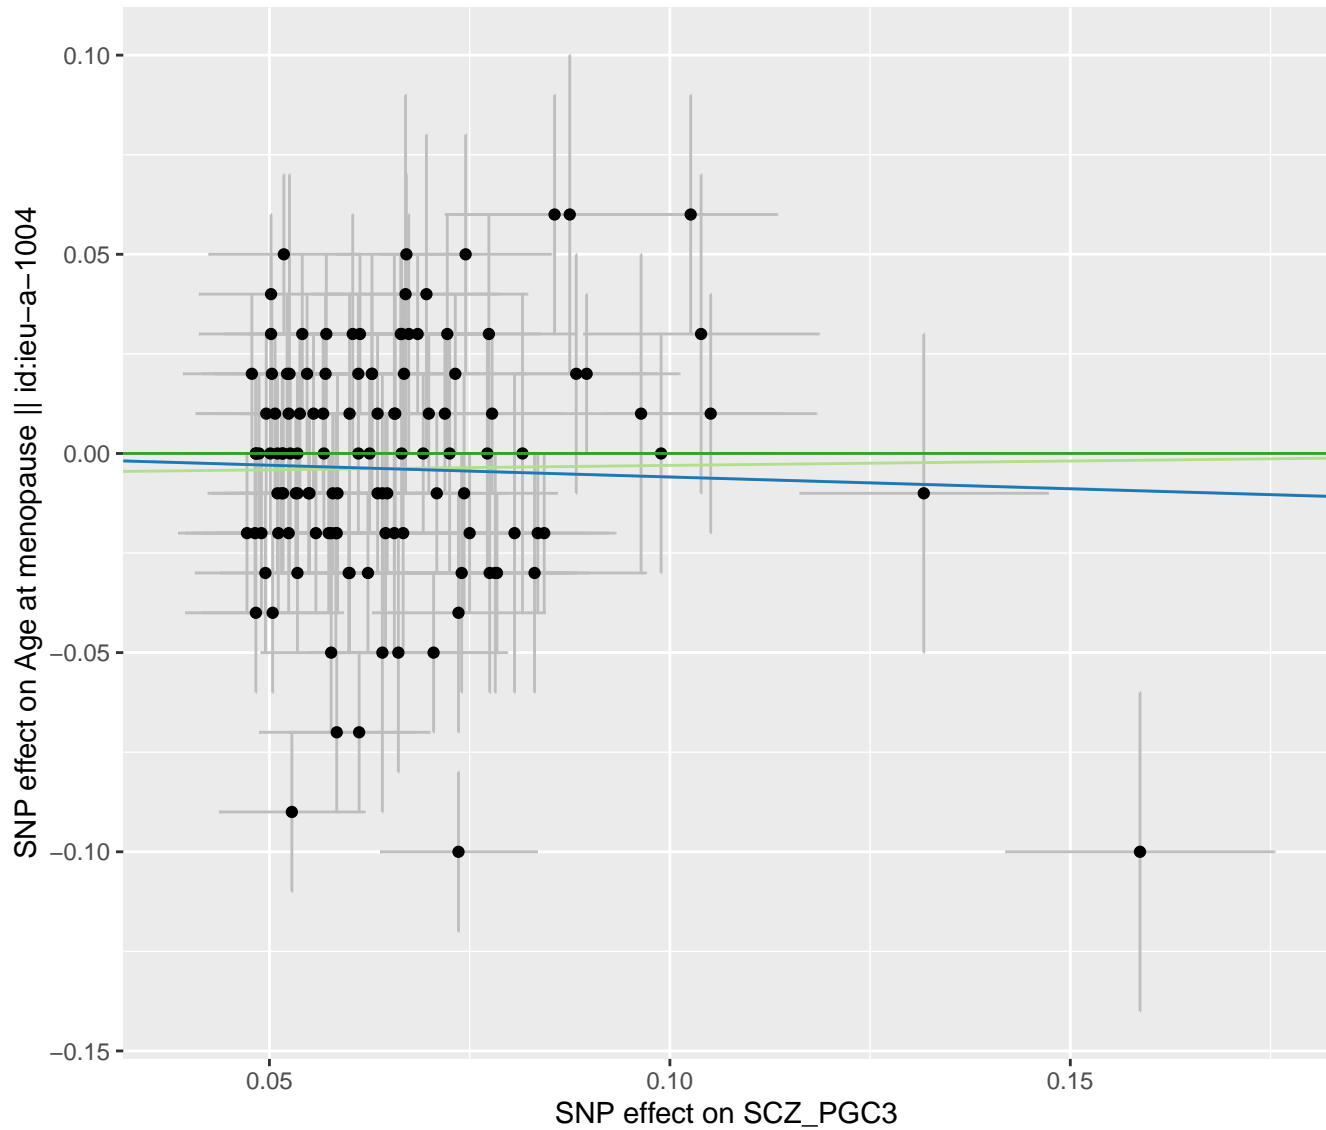

Supplement: Supplementary file [file 2020.09.12.20192922-5.zip]
