# Supplementary material
Source: bioRxiv or medRxiv preprint supplement (http://medrxiv.stage.highwire.org/highwire/filestream/96583/field_highwire_adjunct_files/4/2020.09.12.20192922-5.zip)

PGC SCZ w3 90 0418b.99.chr6

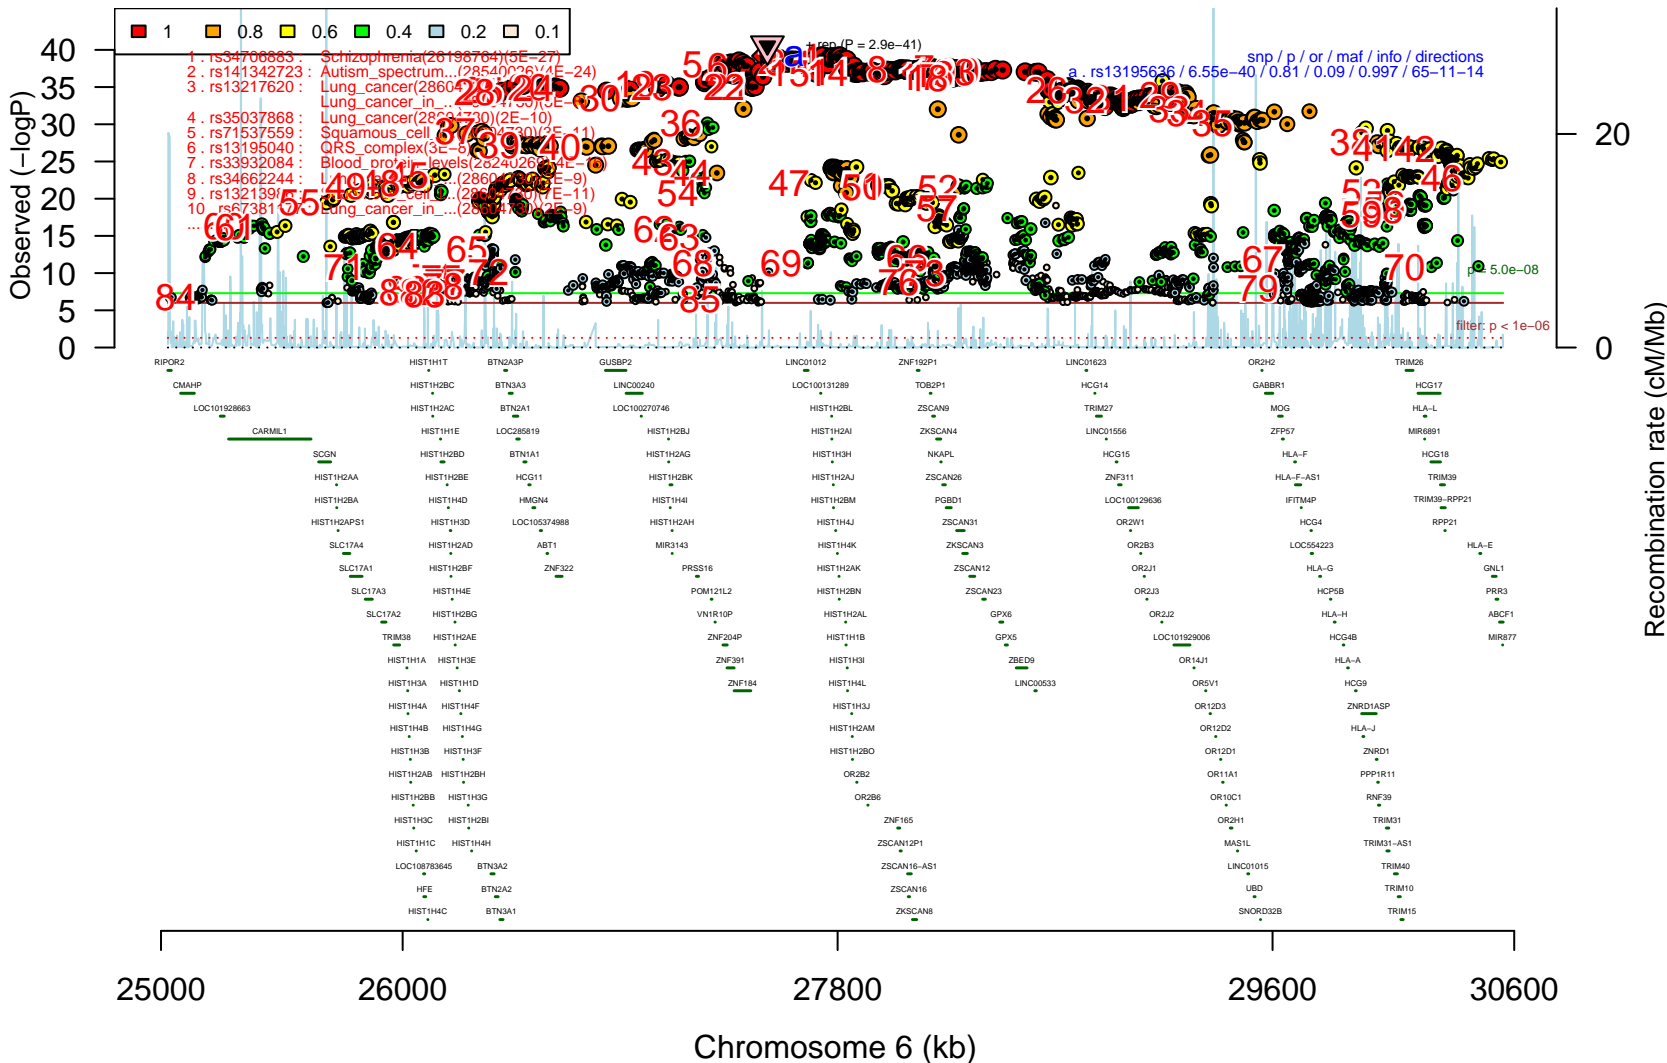

# PGC\_SCZ\_w3\_90\_0418b.116.chr7

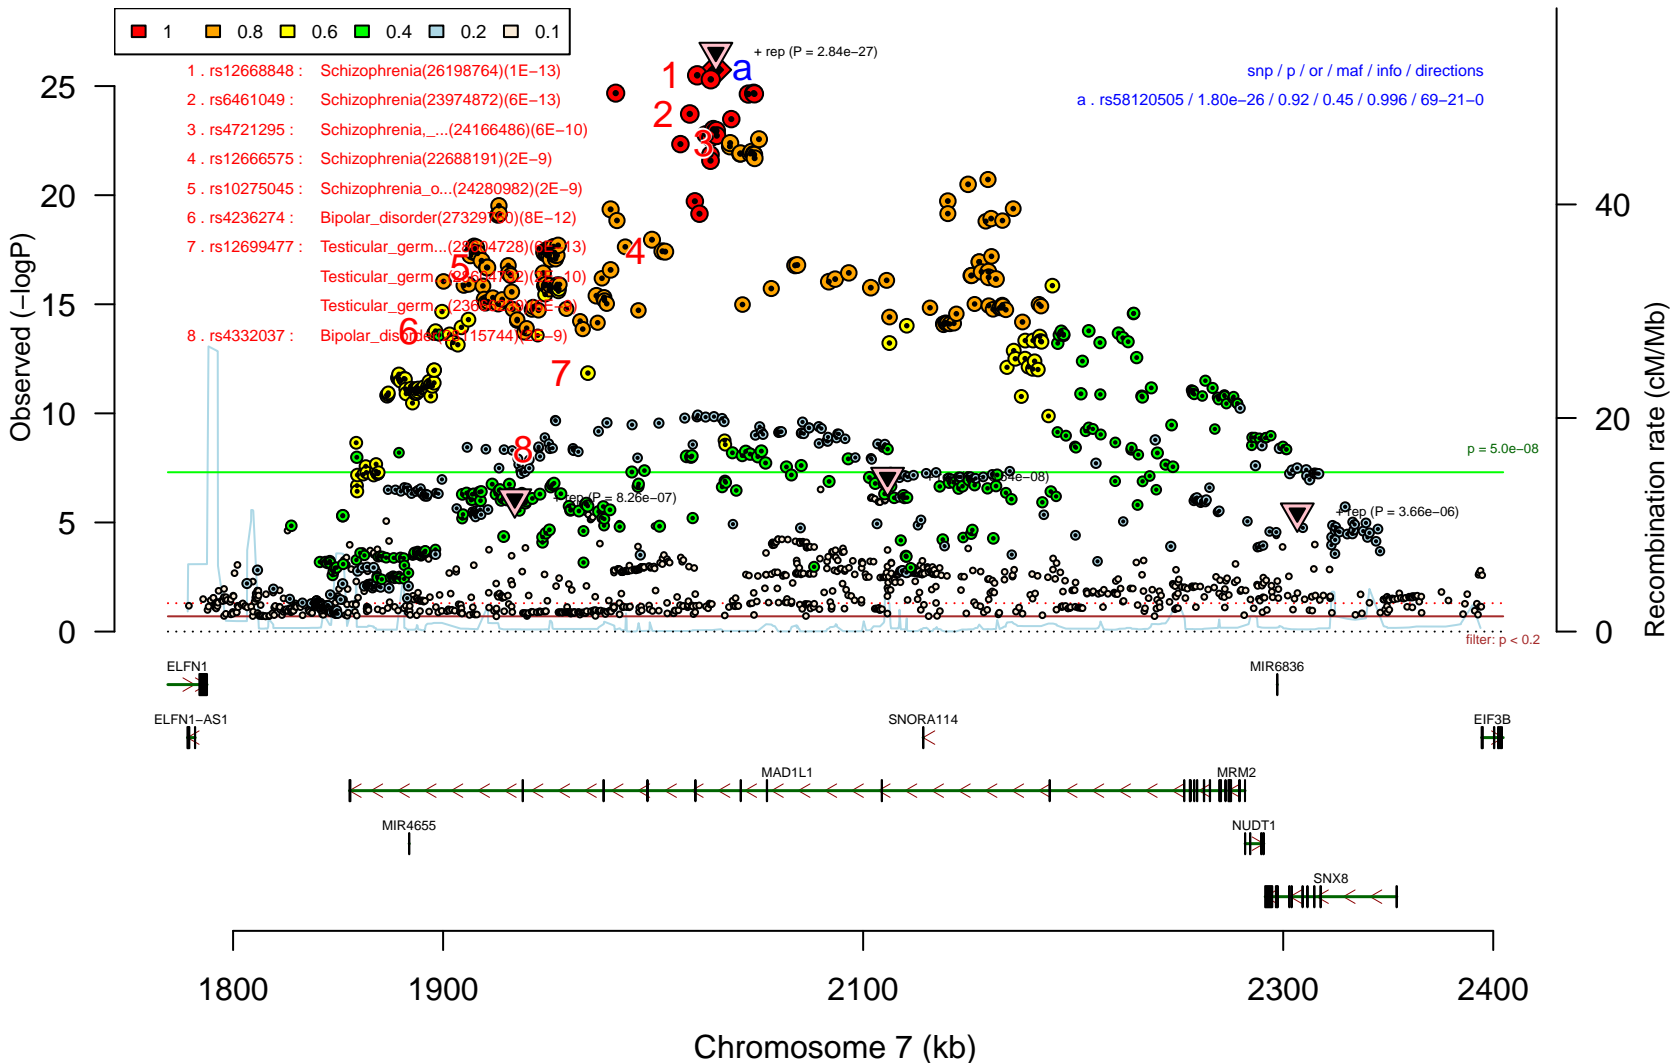

# PGC\_SCZ\_w3\_90\_0418b.226.chr15

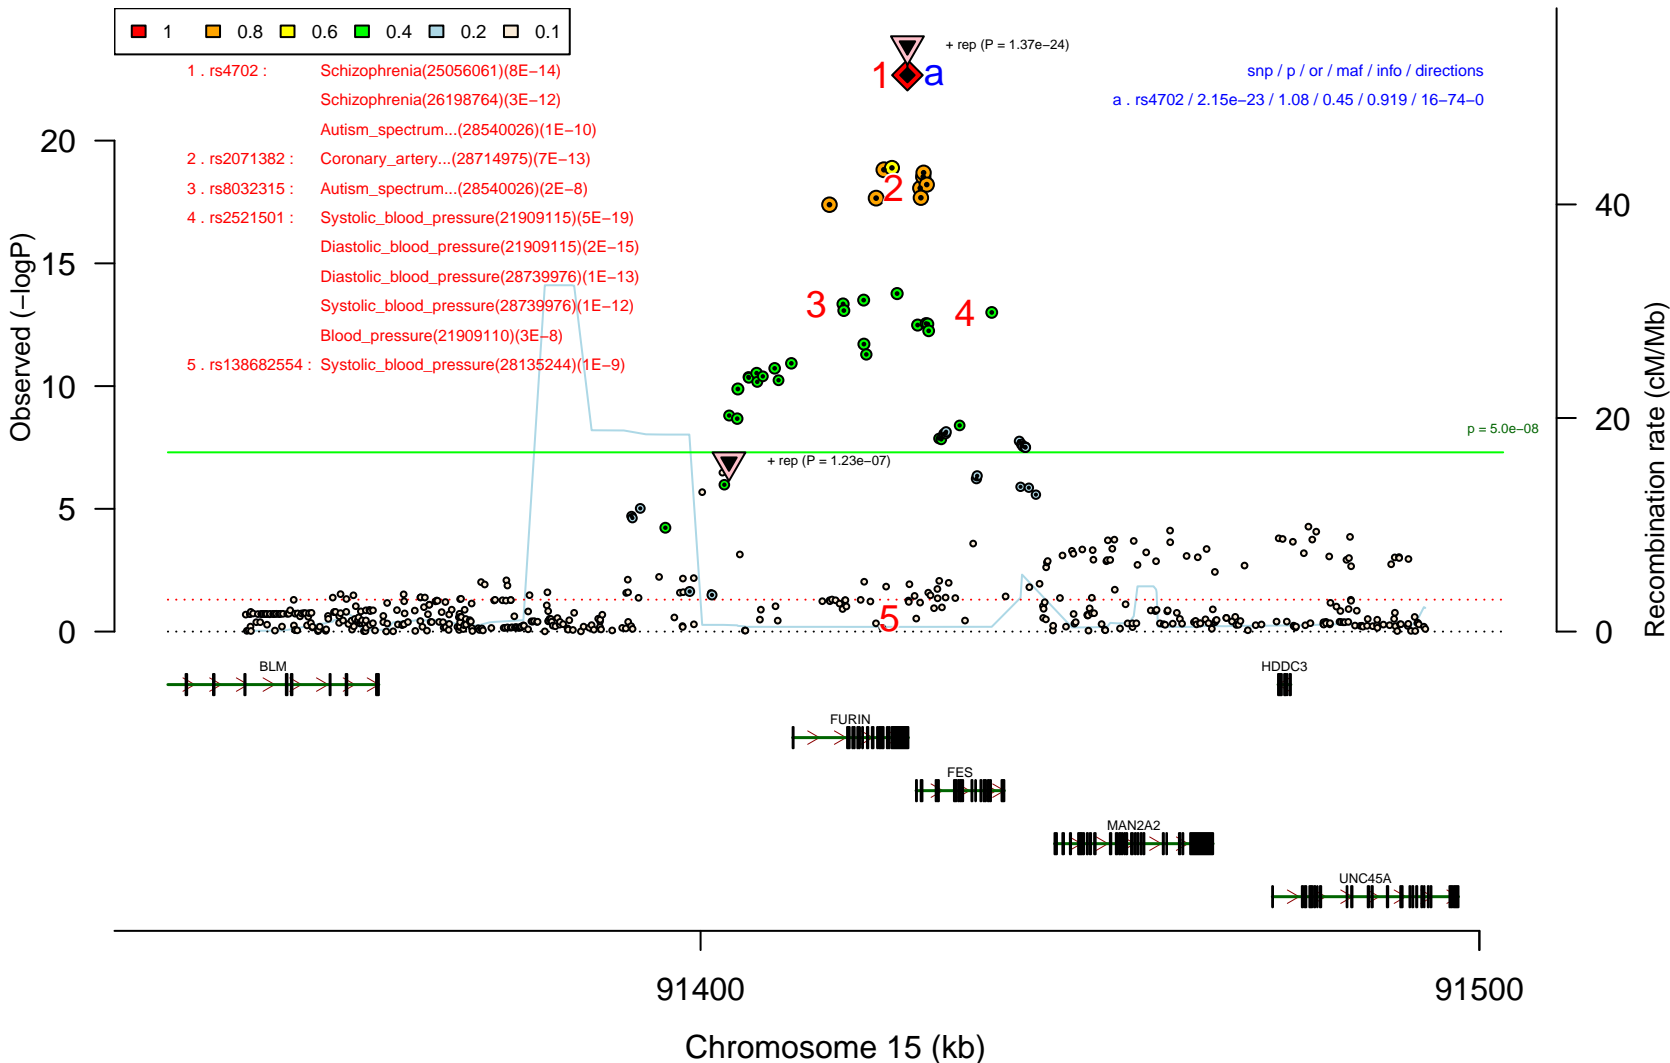

# PGC\_SCZ\_w3\_90\_0418b.164.chr10

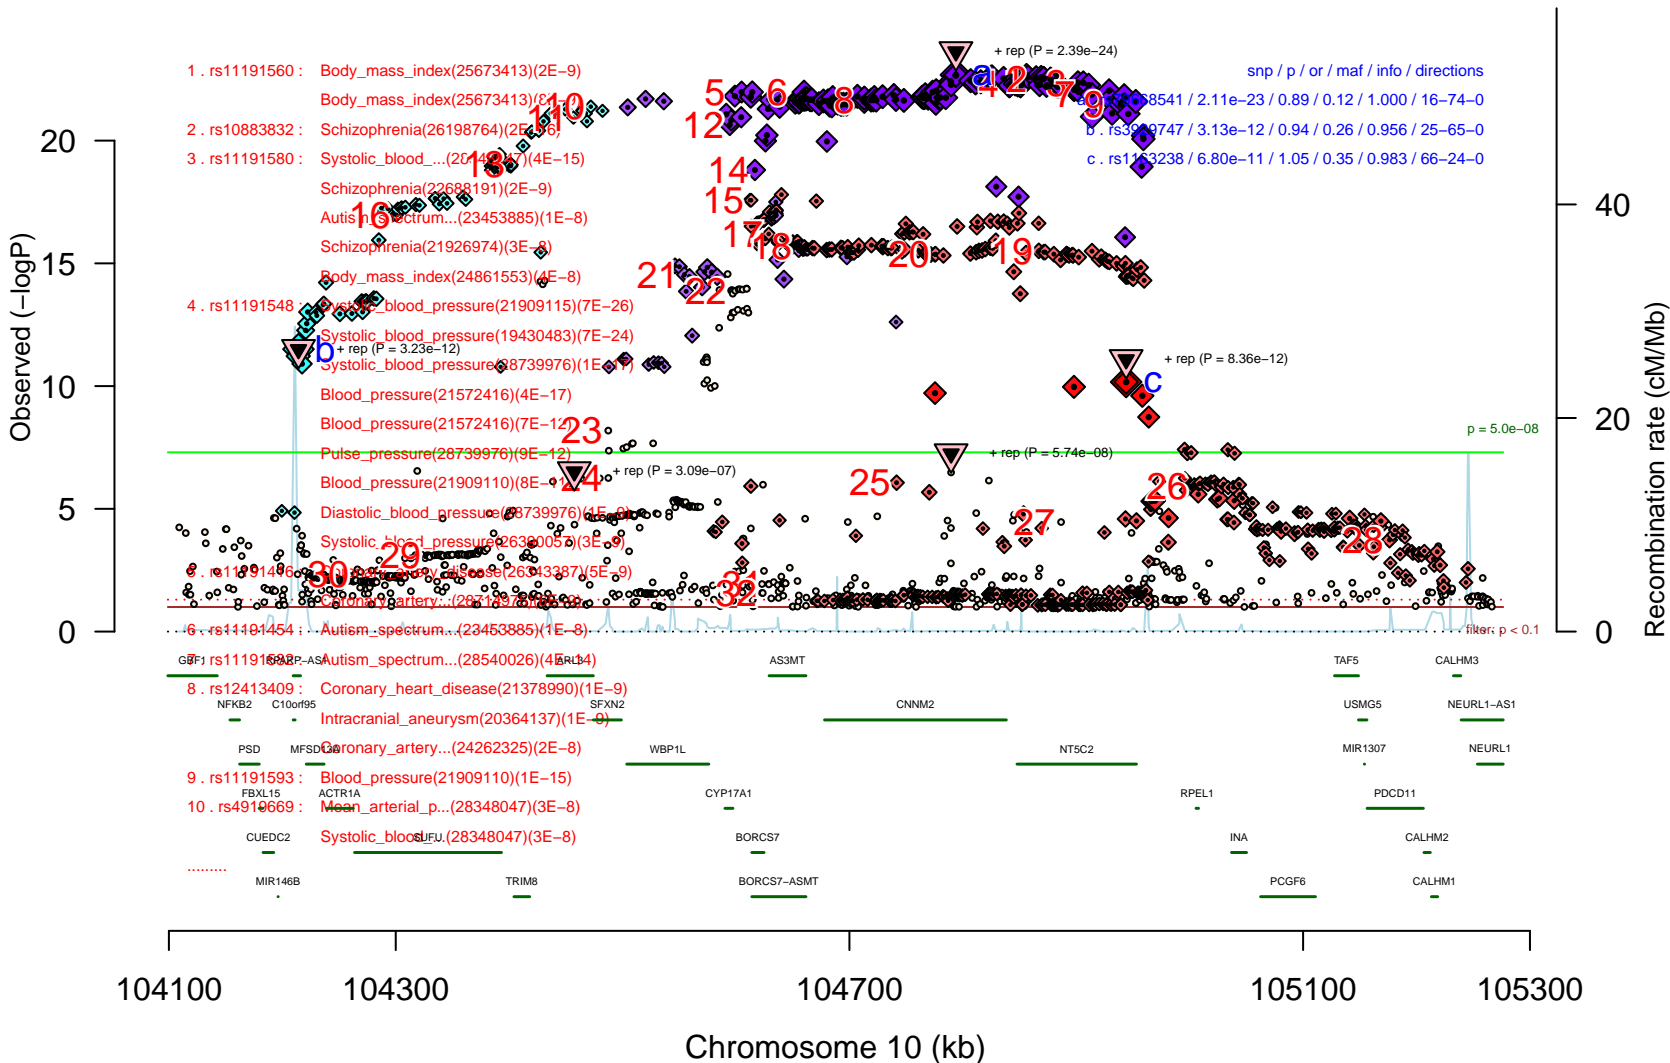

# PGC\_SCZ\_w3\_90\_0418b.182.chr12

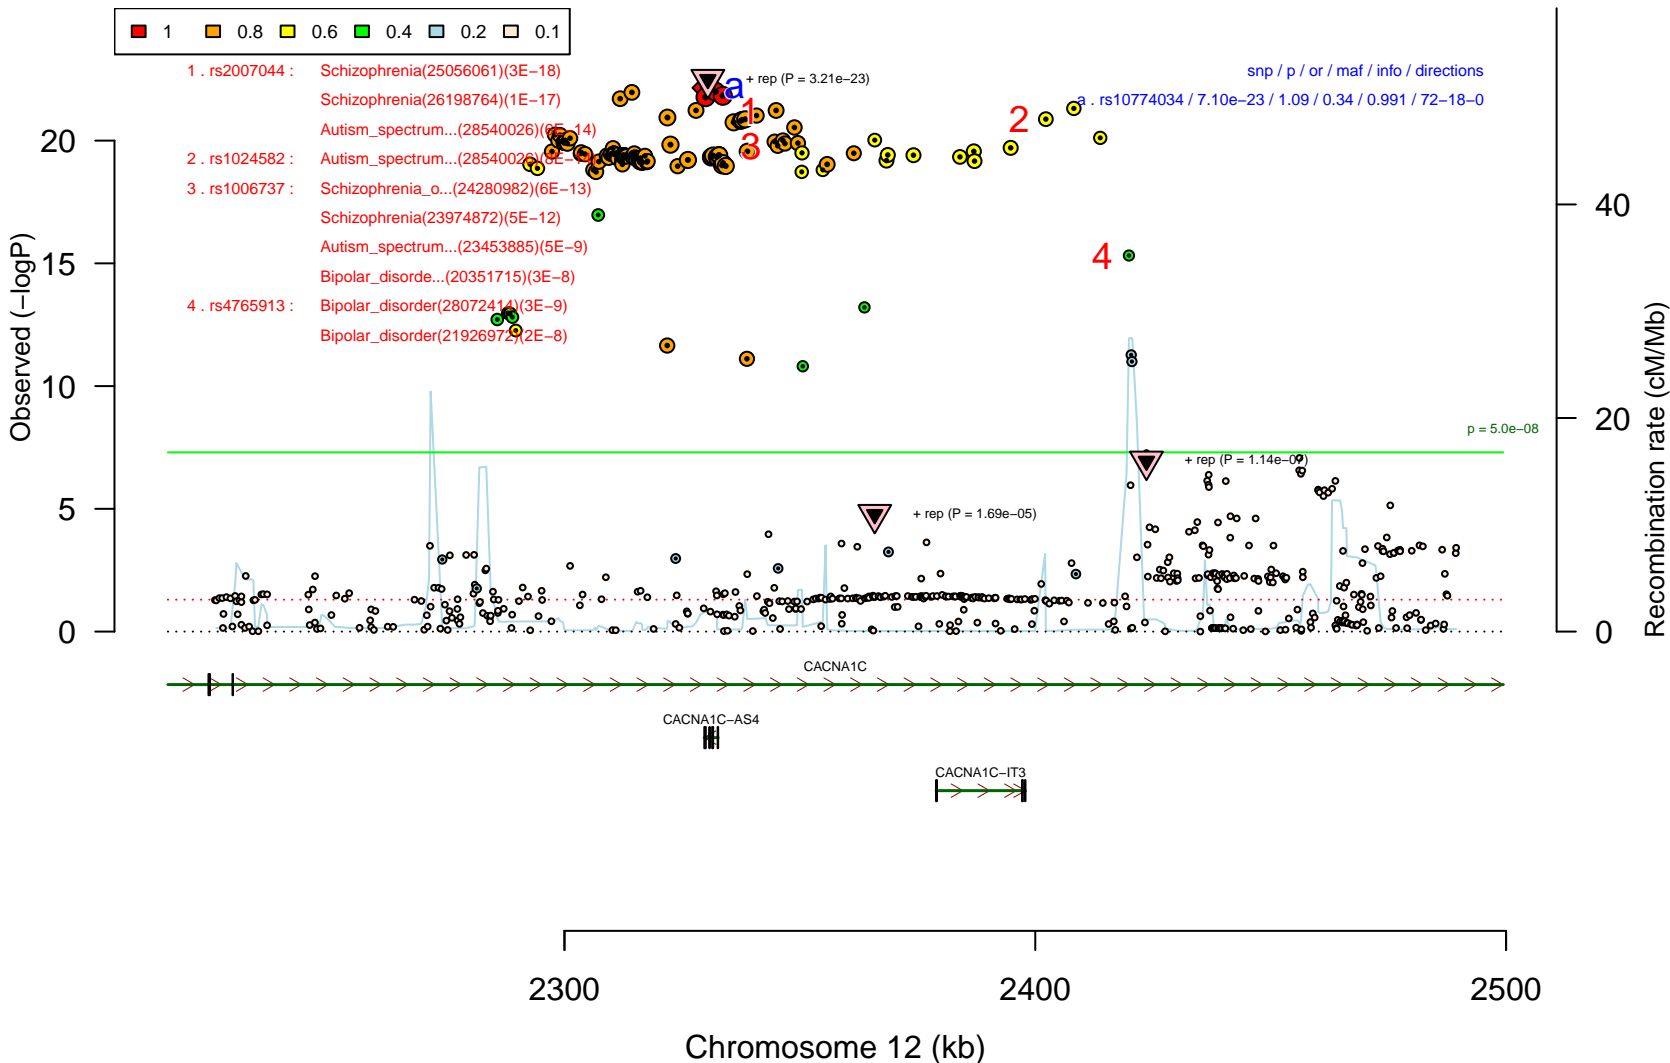

# PGC\_SCZ\_w3\_90\_0418b.200.chr12

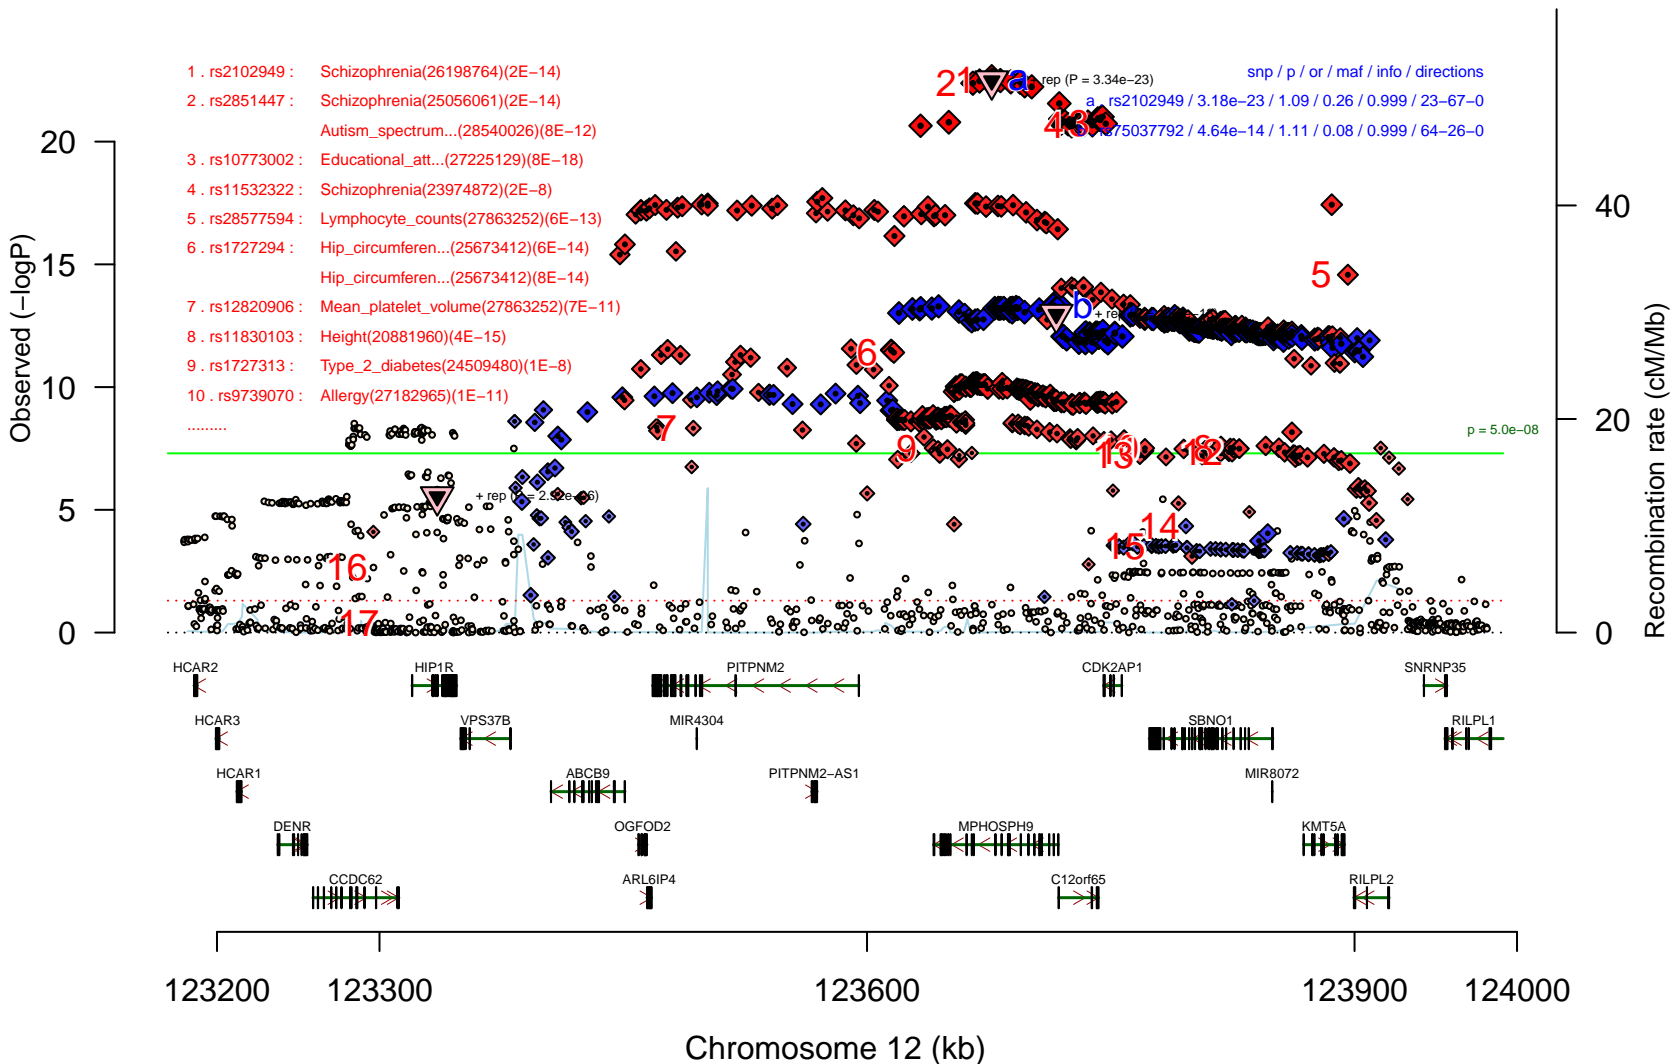

# PGC\_SCZ\_w3\_90\_0418b.73.chr4

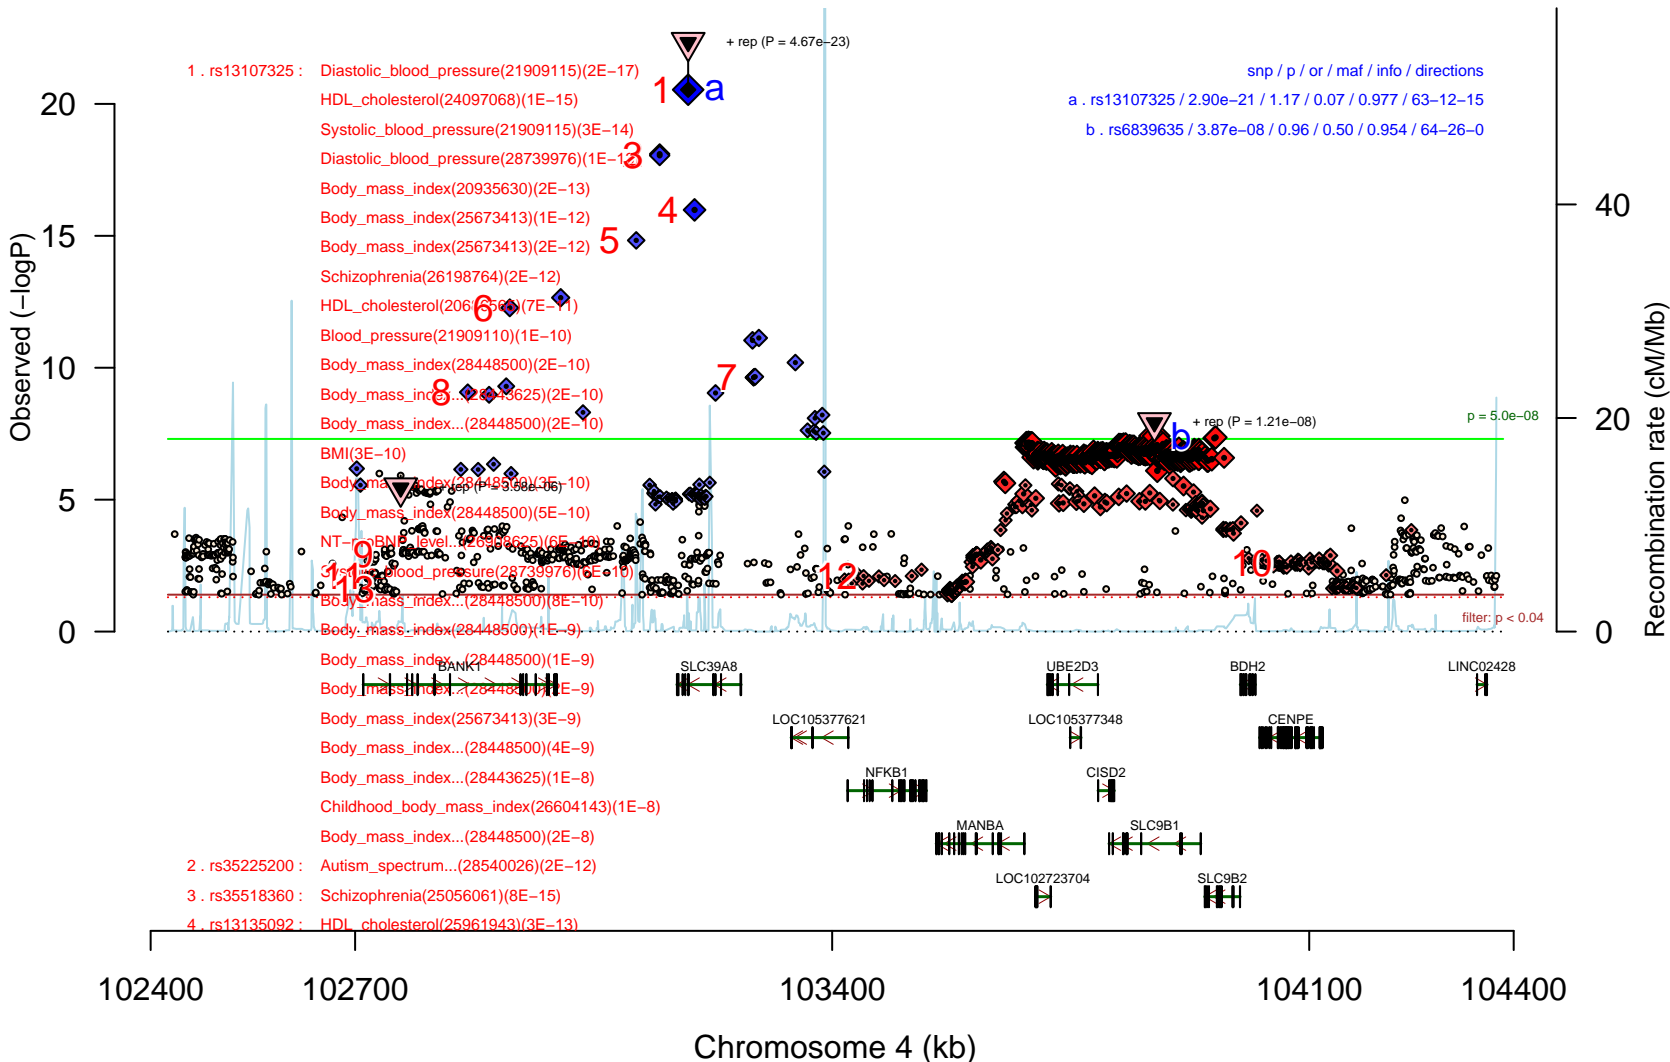

# PGC\_SCZ\_w3\_90\_0418b.14.chr1

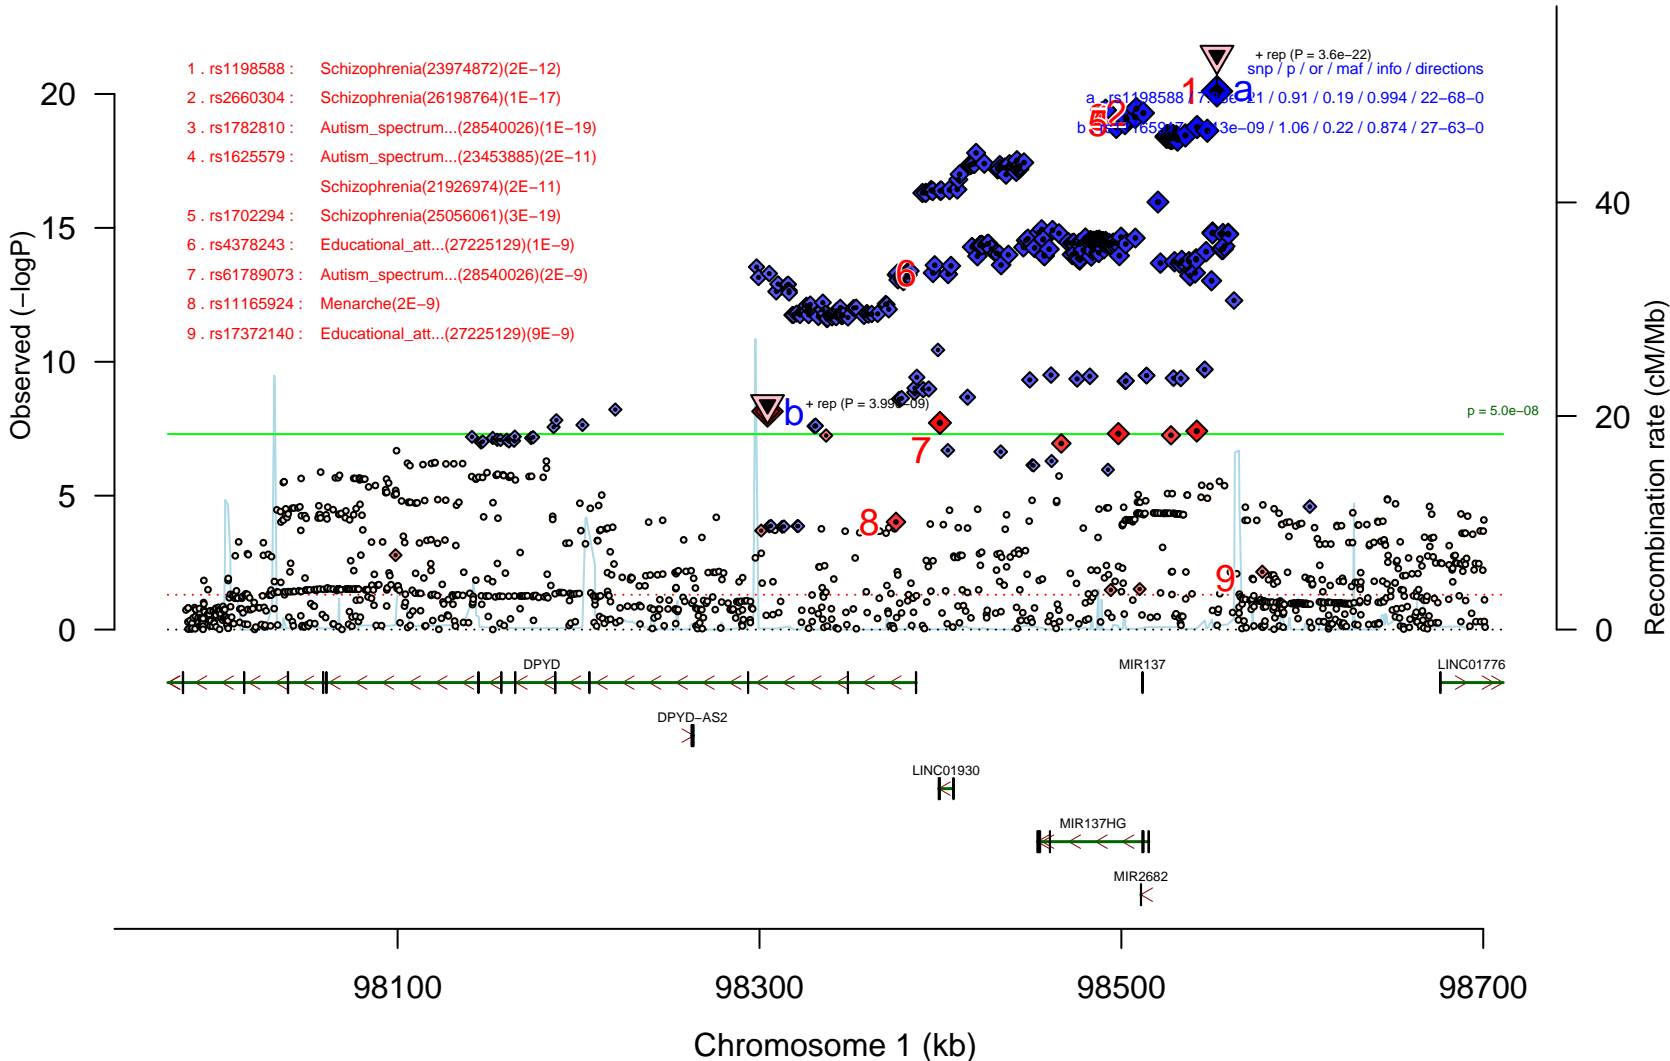



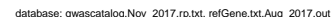

PGC\_SCZ\_w3\_90\_0418b.147.chr8

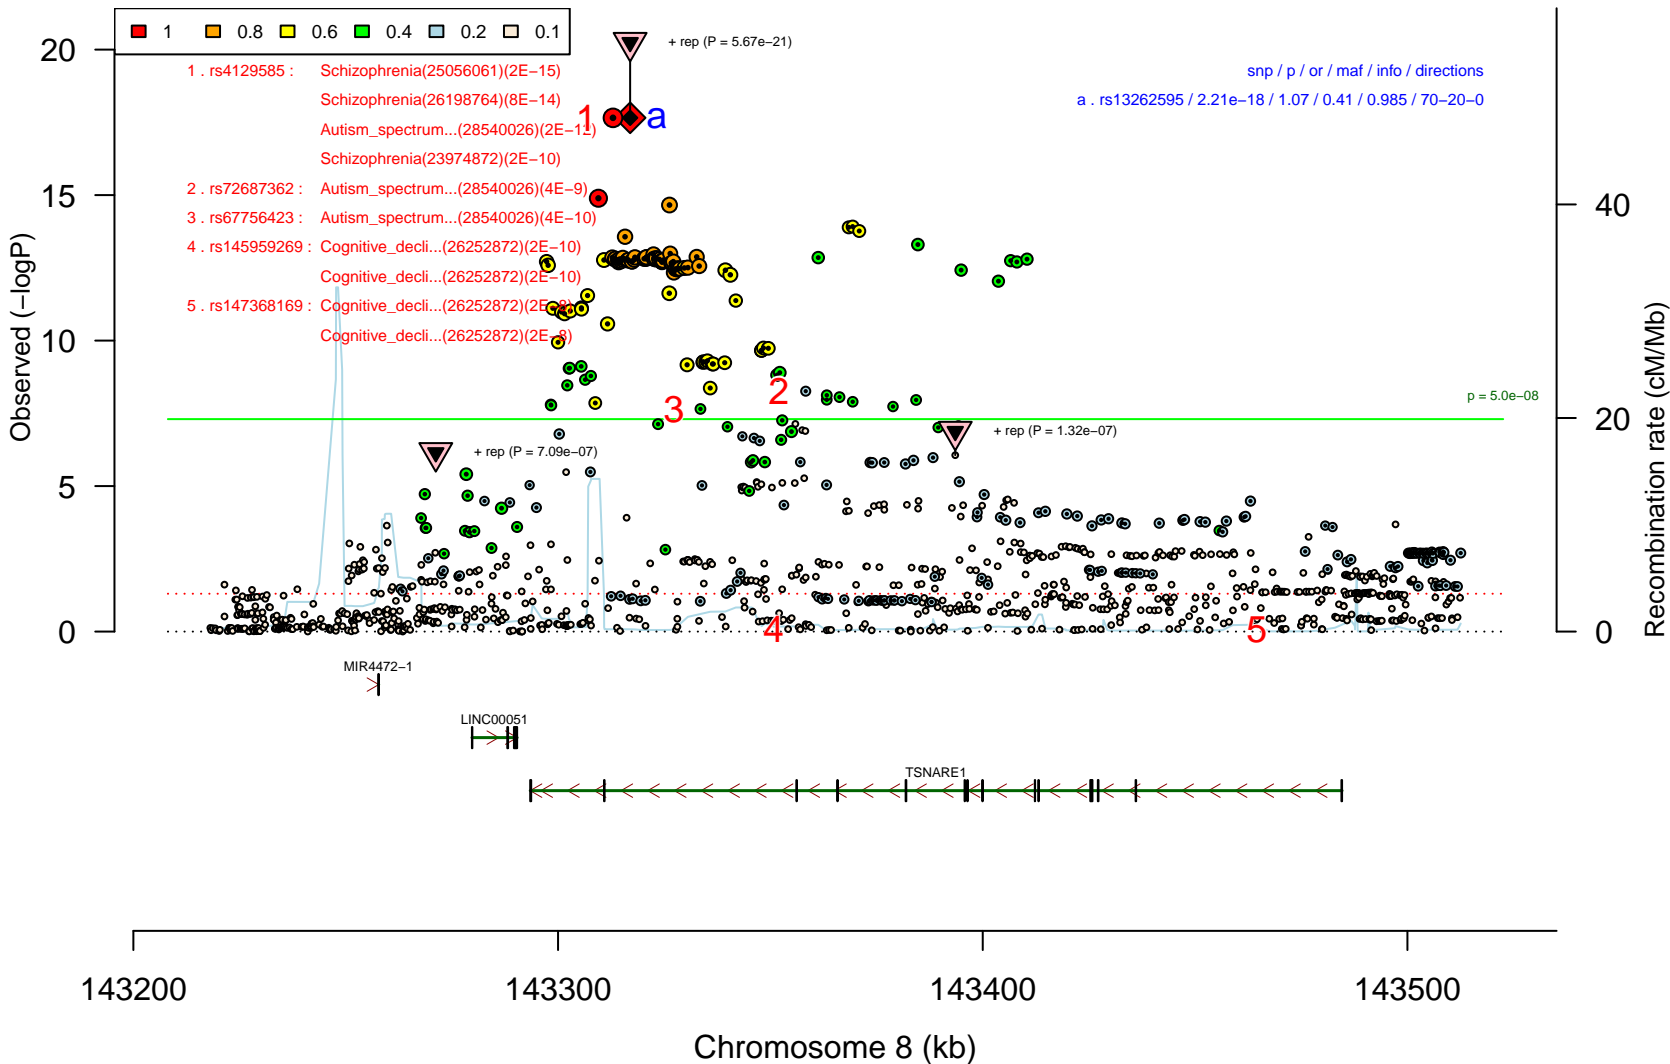

# PGC\_SCZ\_w3\_90\_0418b.57.chr3

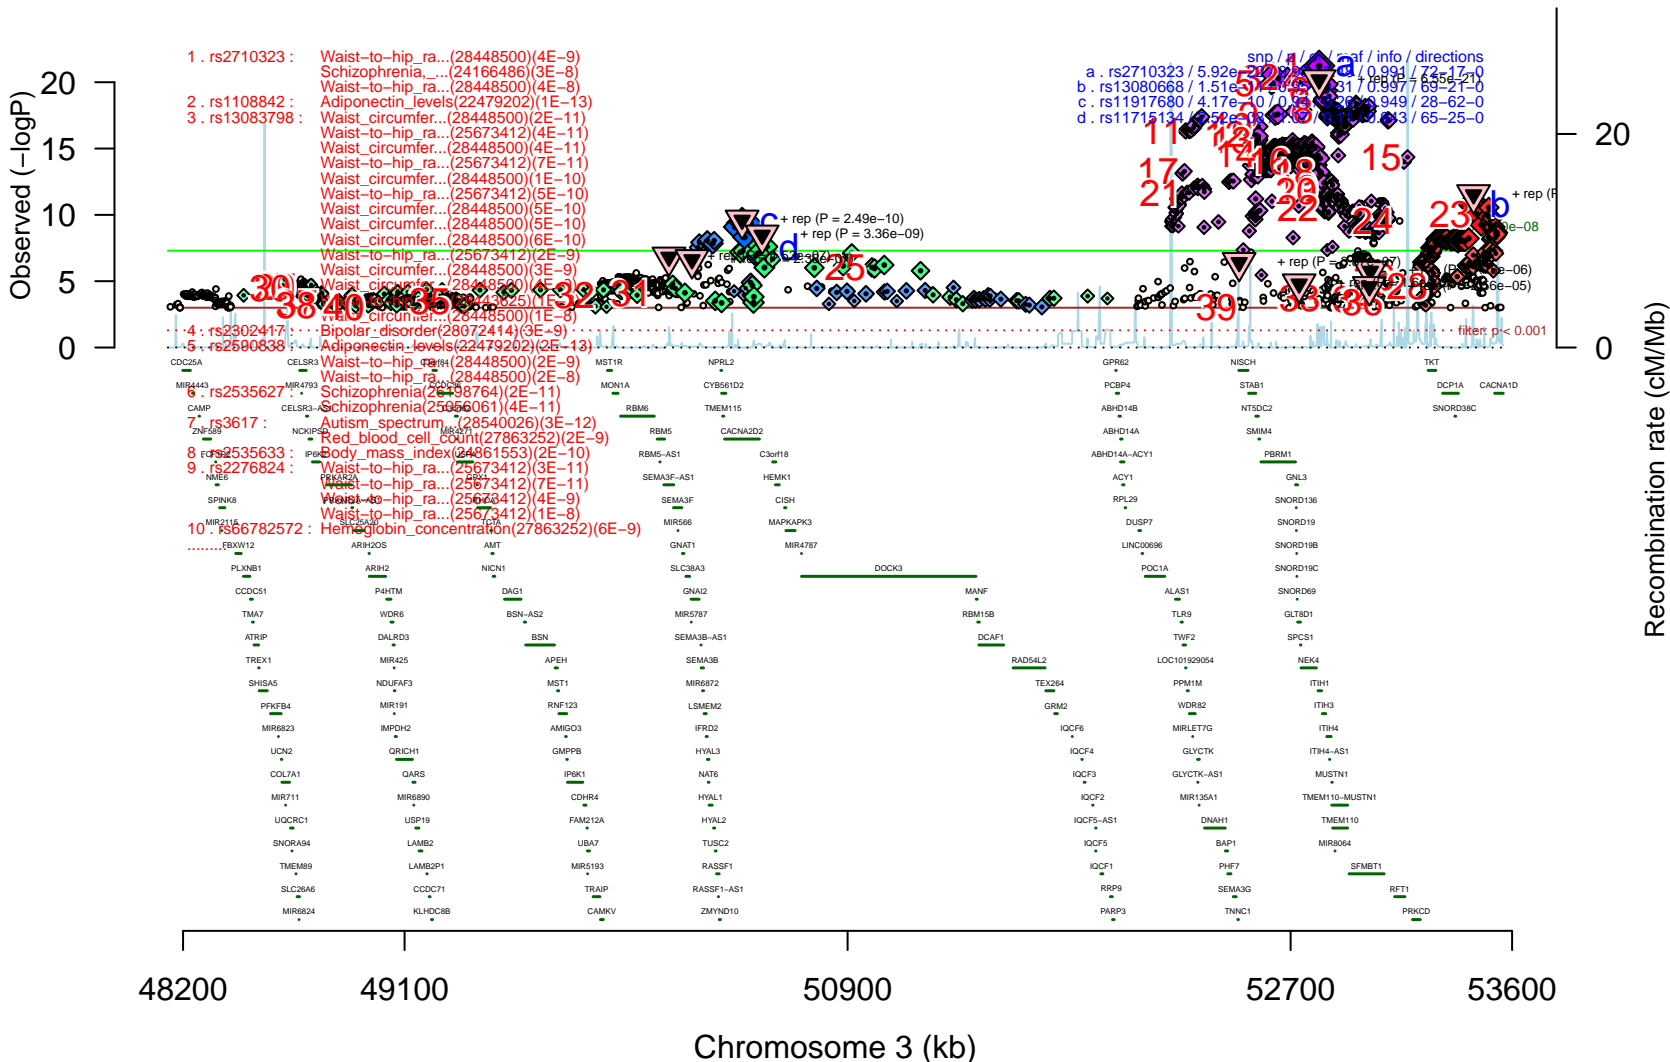

# PGC\_SCZ\_w3\_90\_0418b.132.chr7

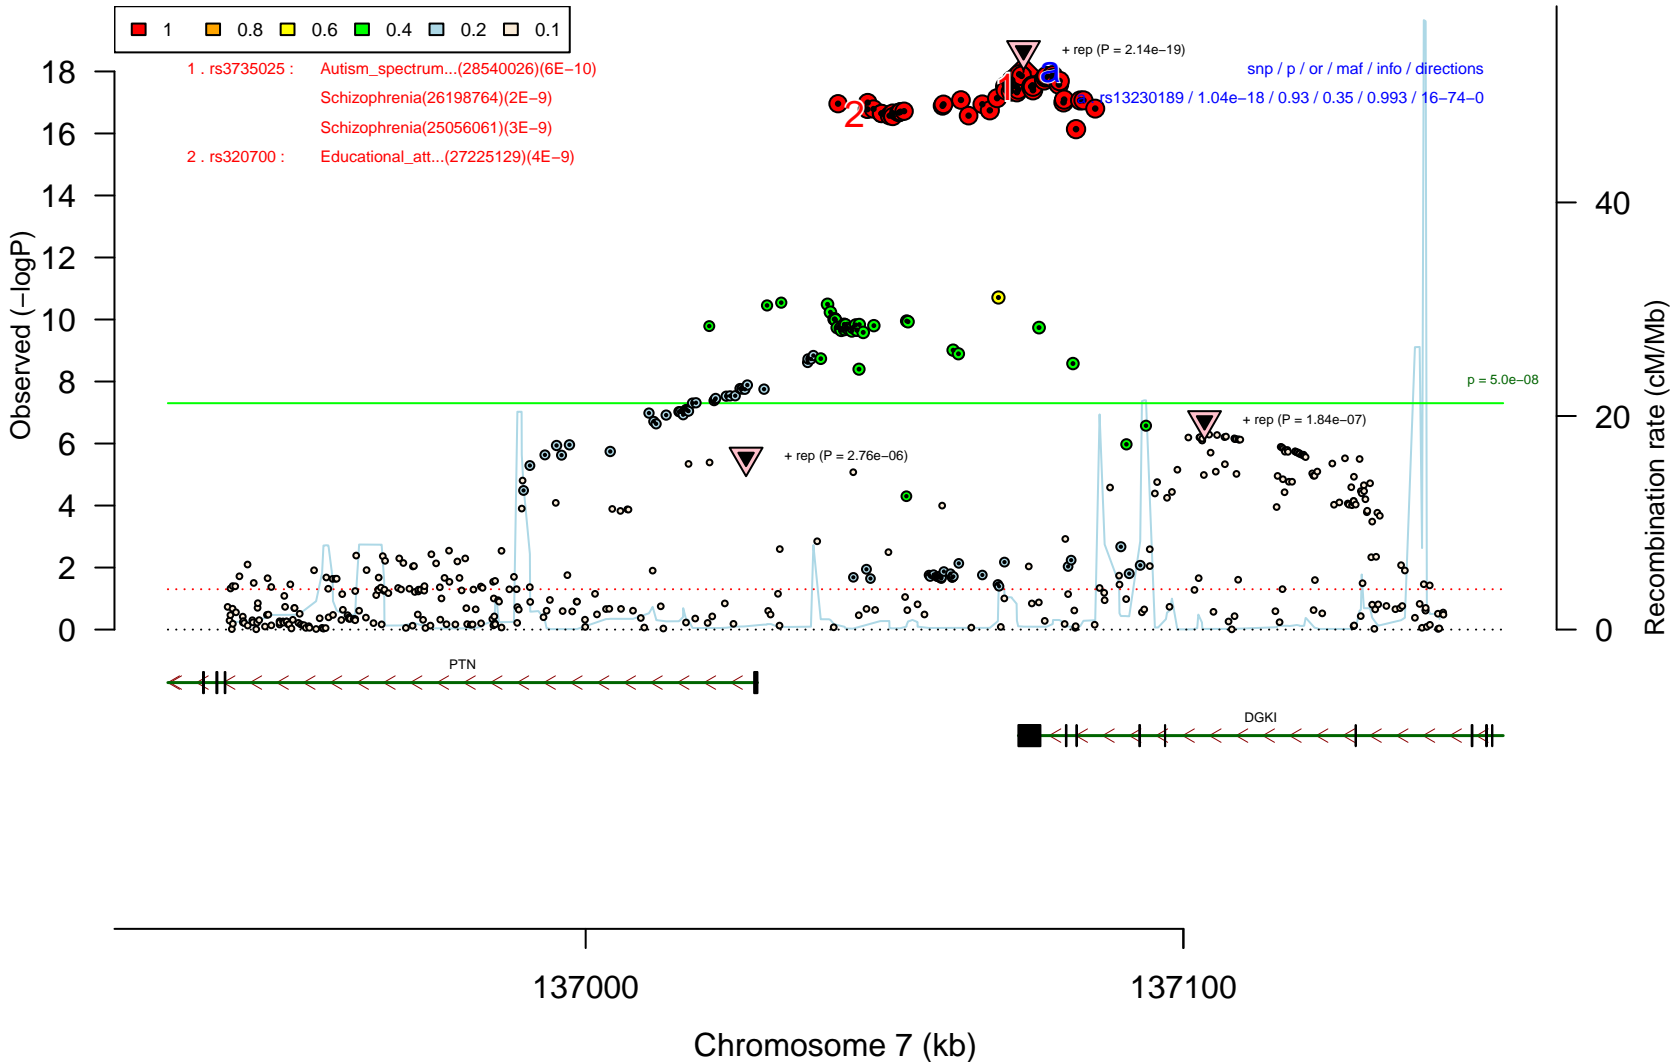

# PGC\_SCZ\_w3\_90\_0418b.11.chr1

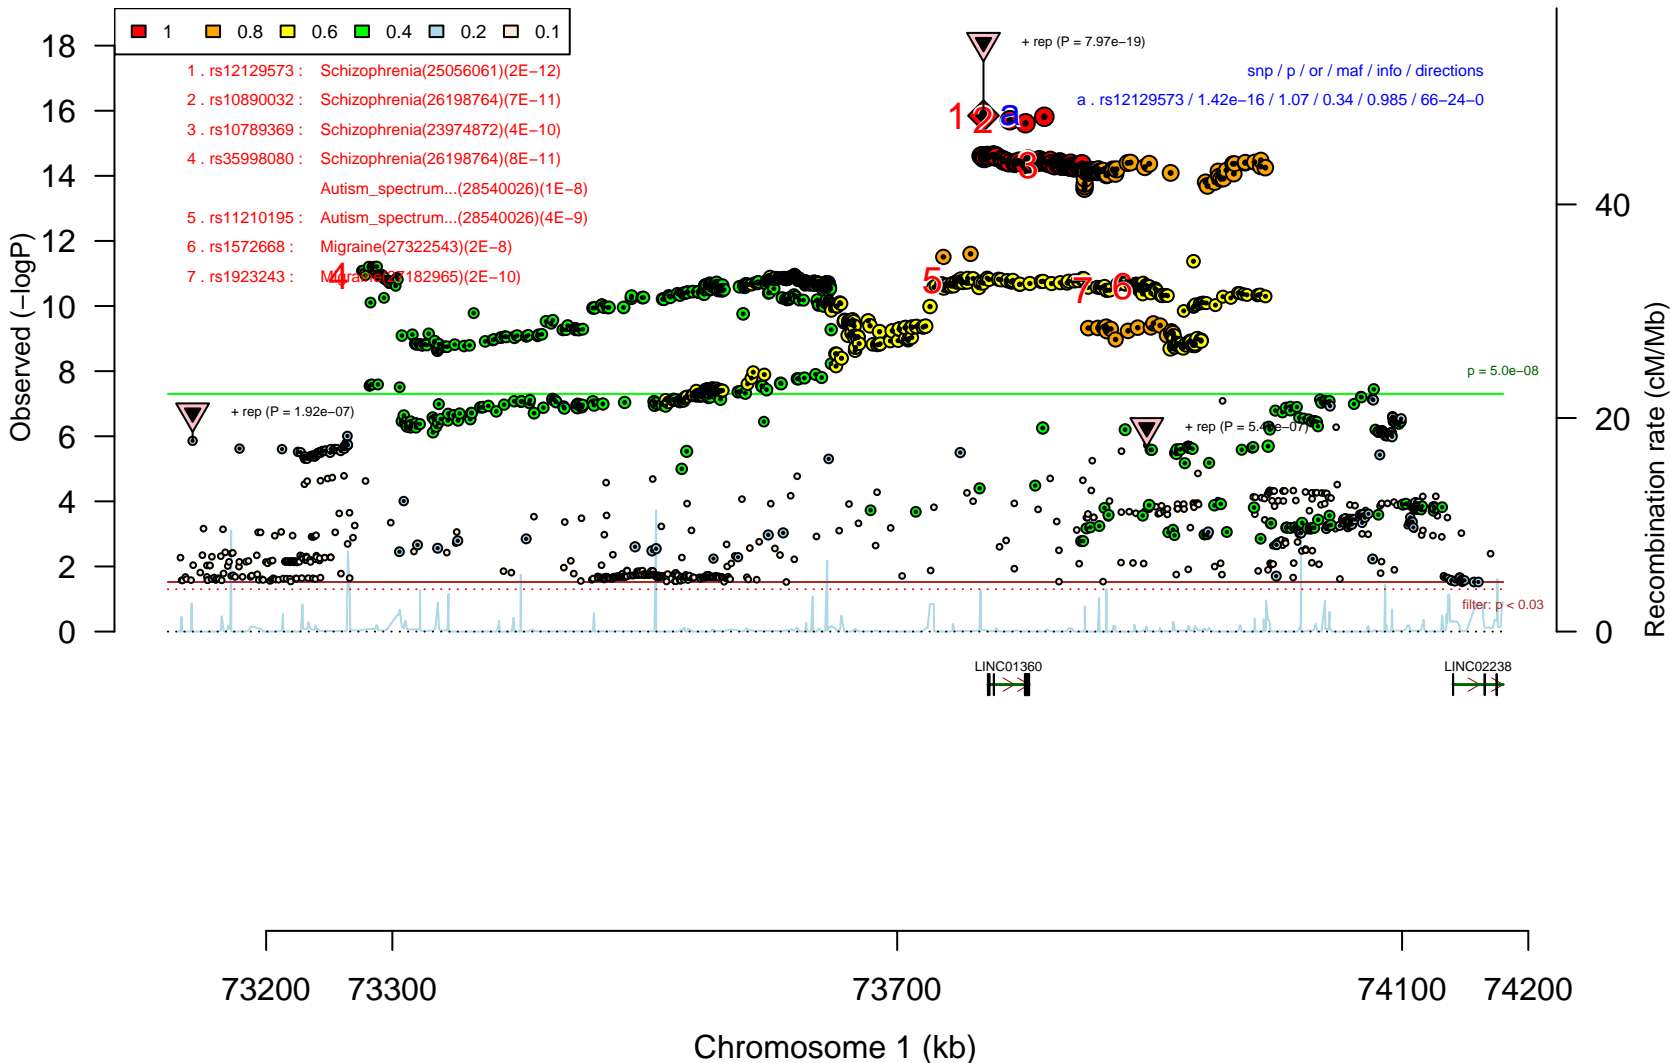

# PGC\_SCZ\_w3\_90\_0418b.213.chr14

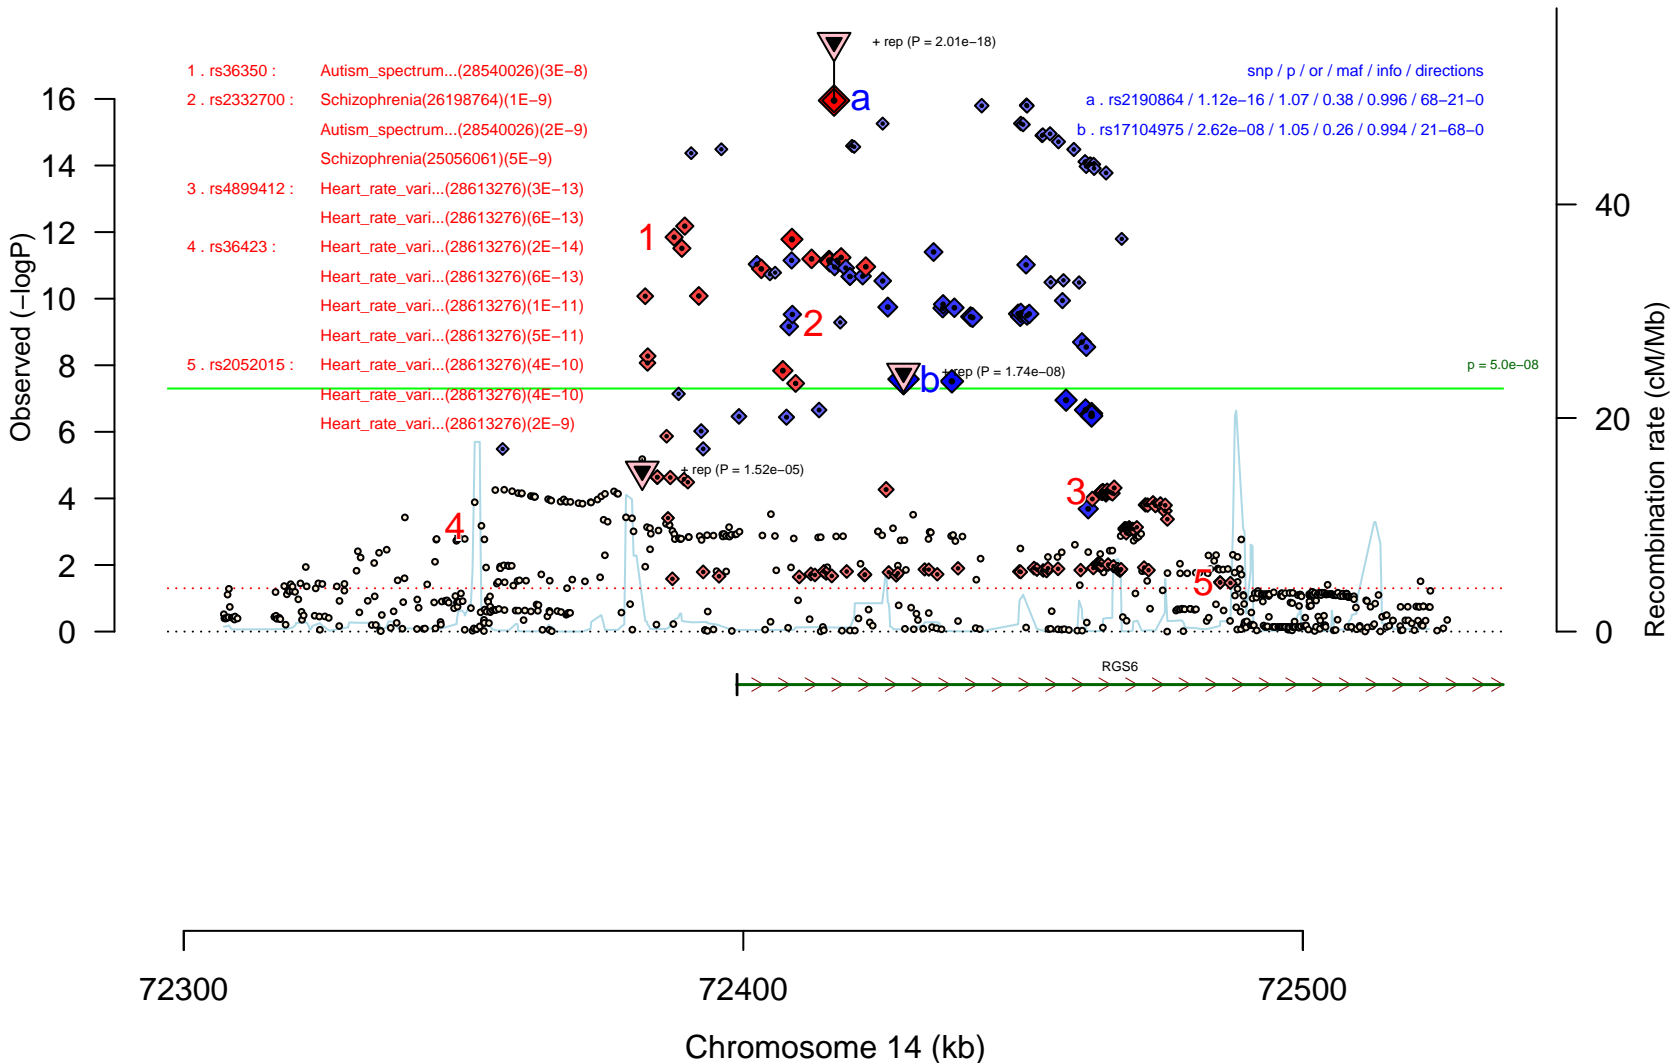

# PGC\_SCZ\_w3\_90\_0418b.51.chr2

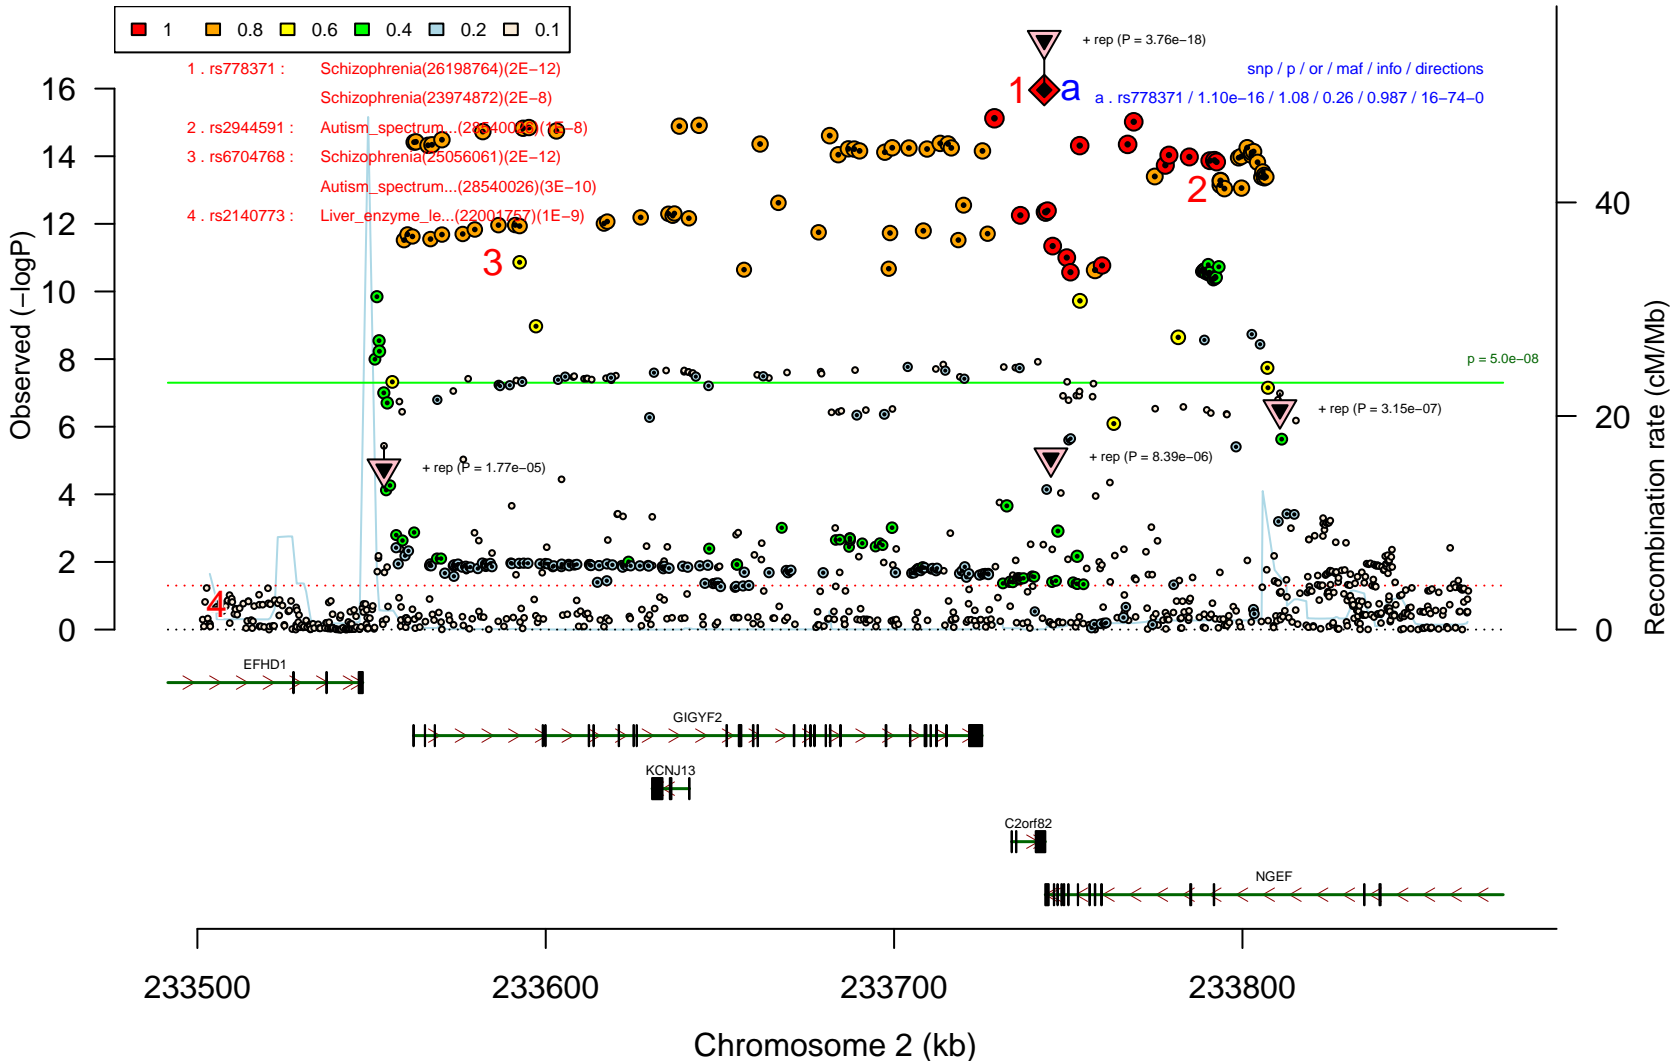

# PGC\_SCZ\_w3\_90\_0418b.66.chr3

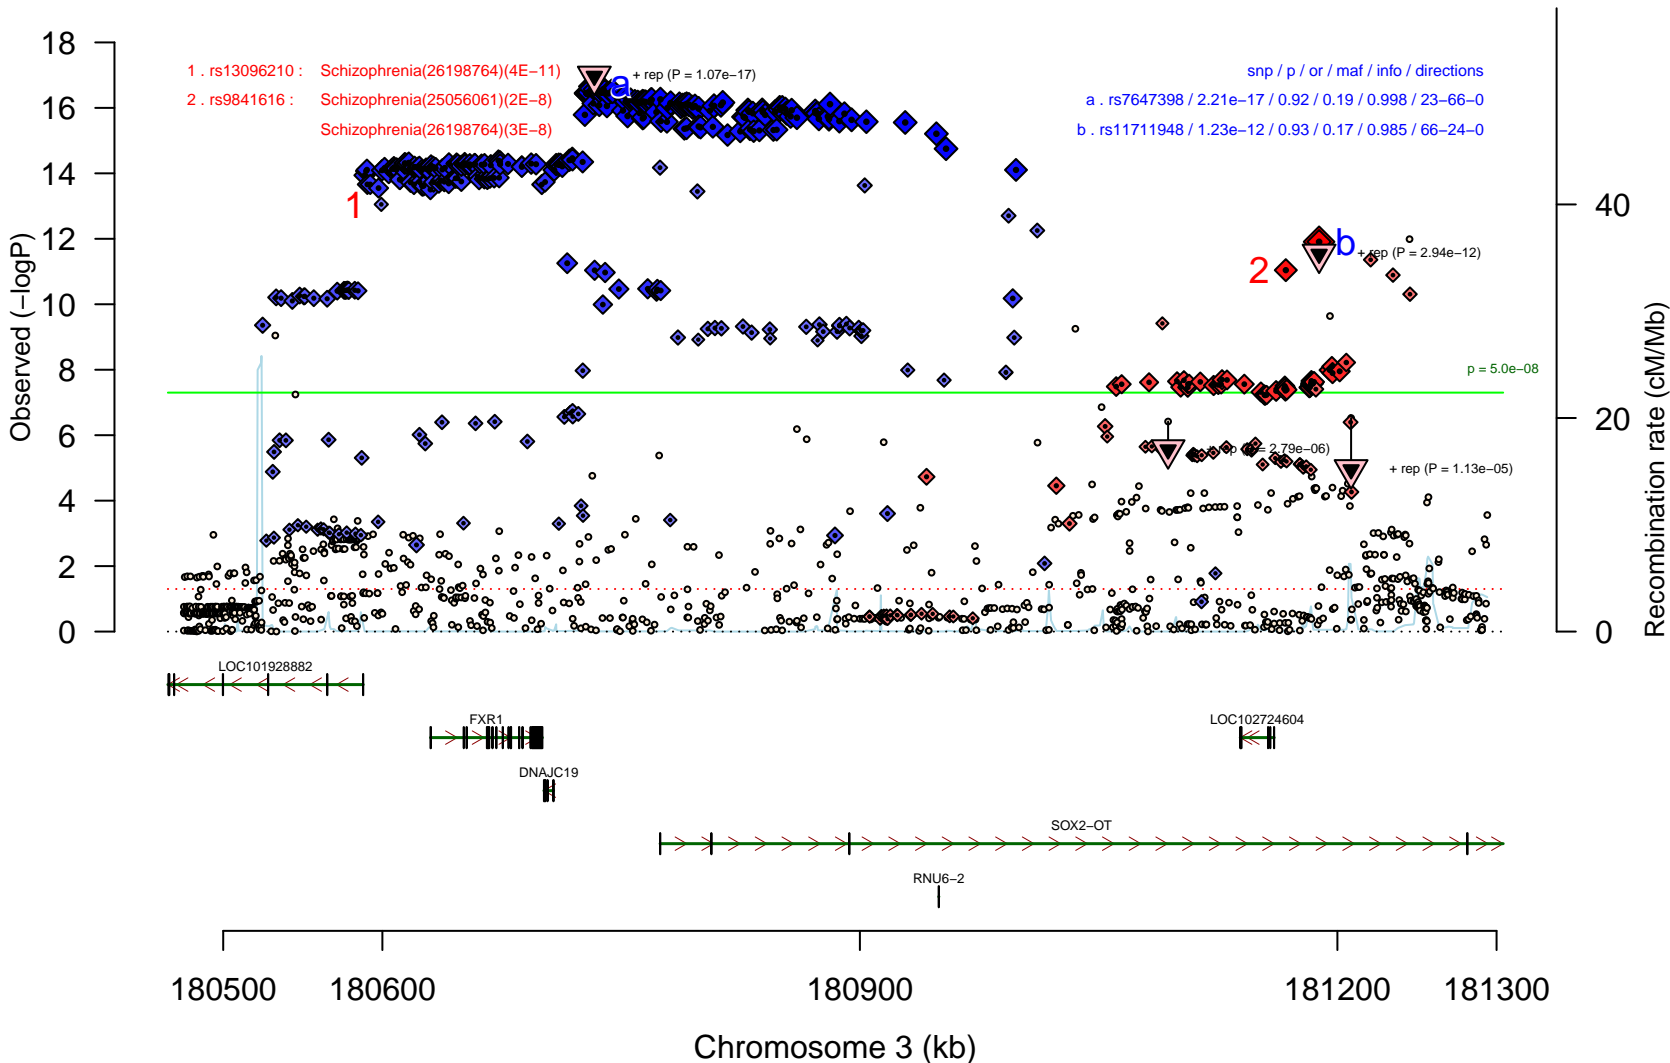



# PGC\_SCZ\_w3\_90\_0418b.85.chr5

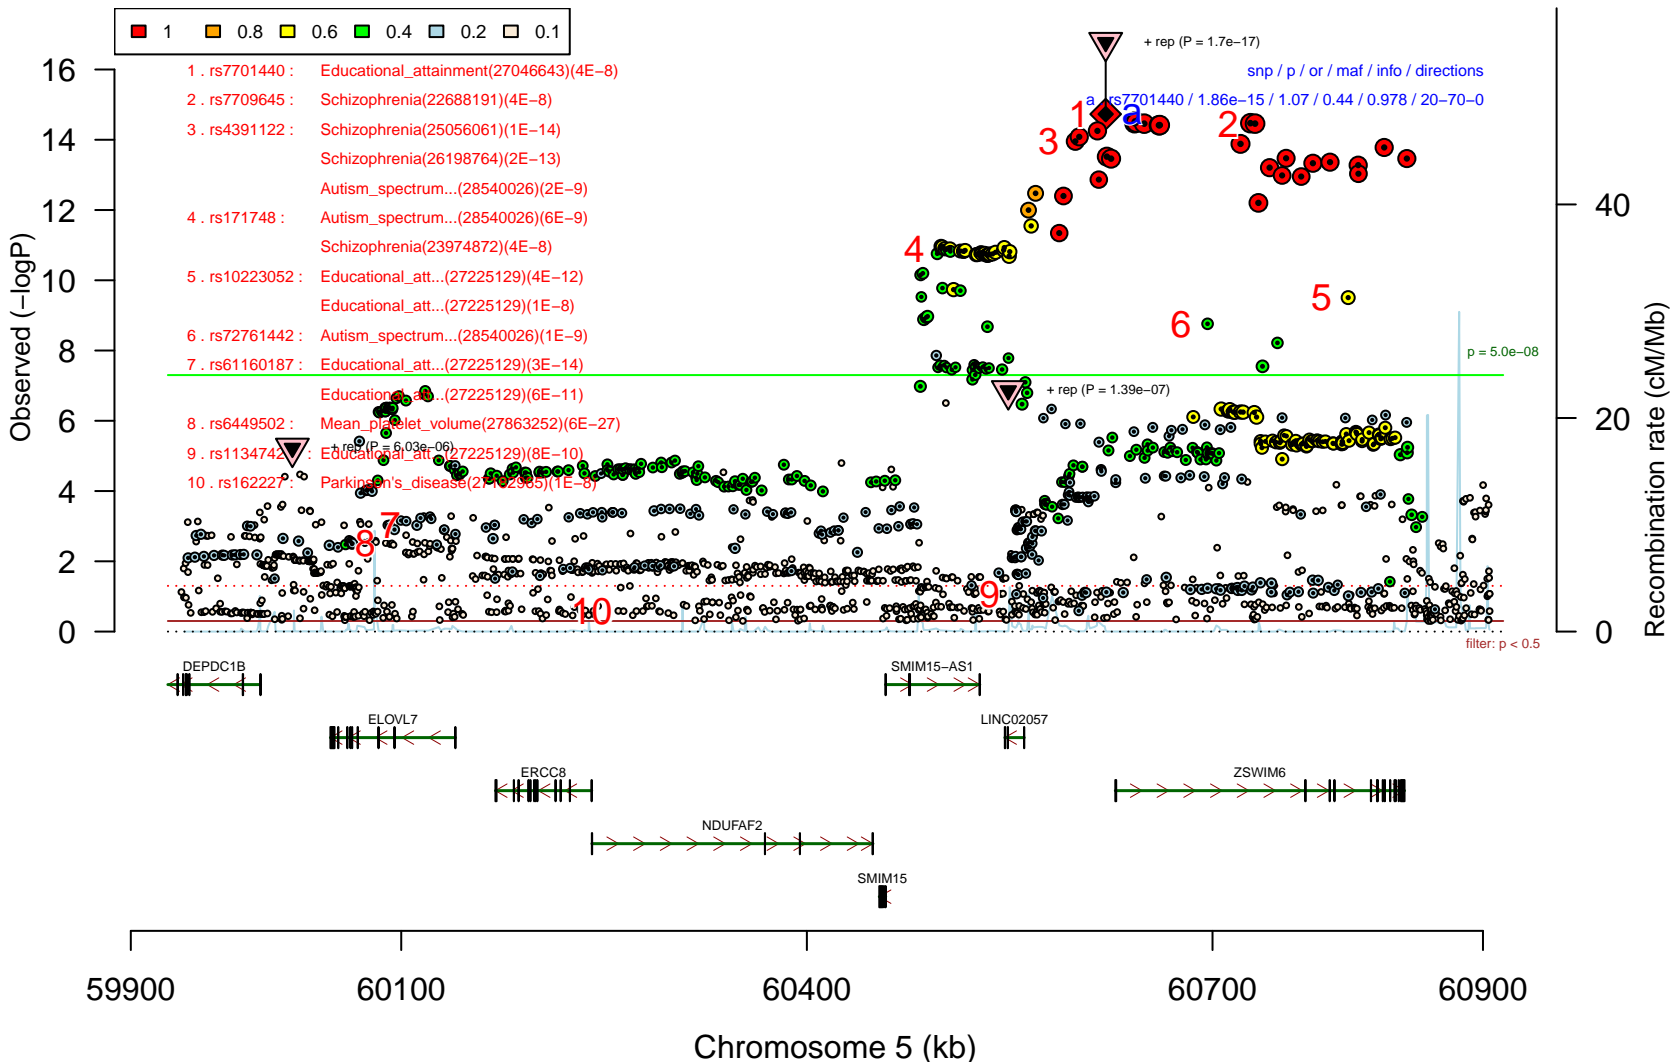

# PGC\_SCZ\_w3\_90\_0418b.196.chr12

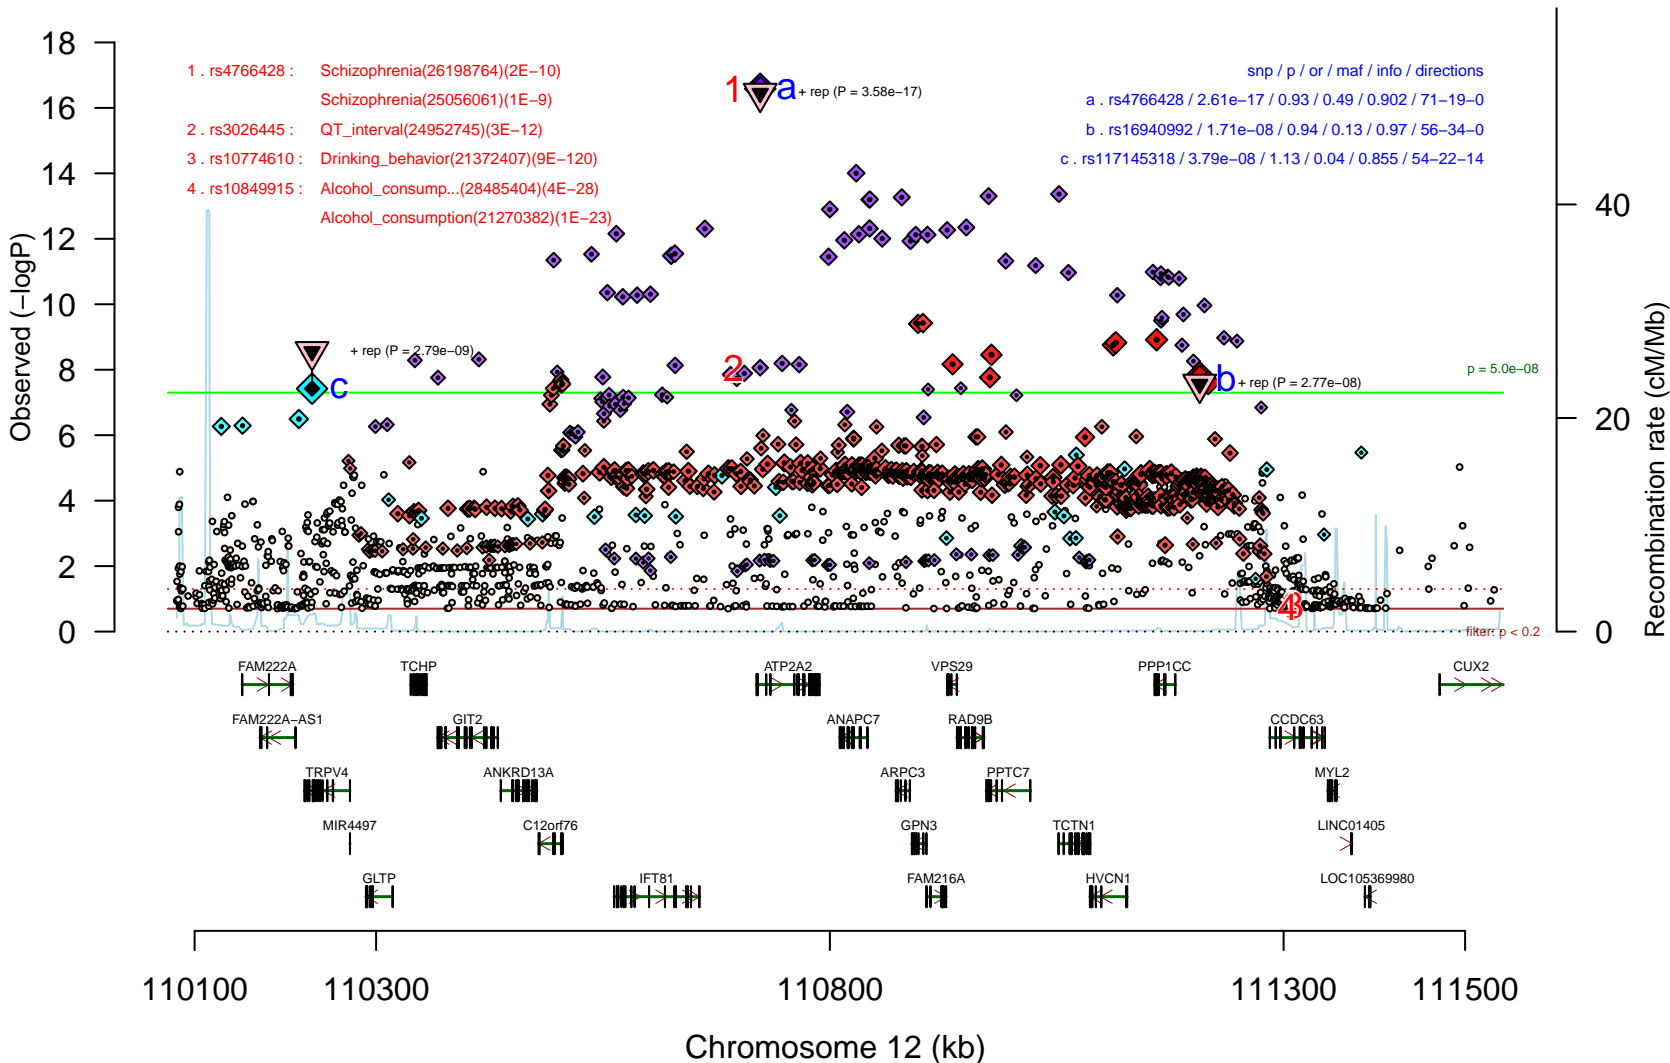

# PGC\_SCZ\_w3\_90\_0418b.249.chr18

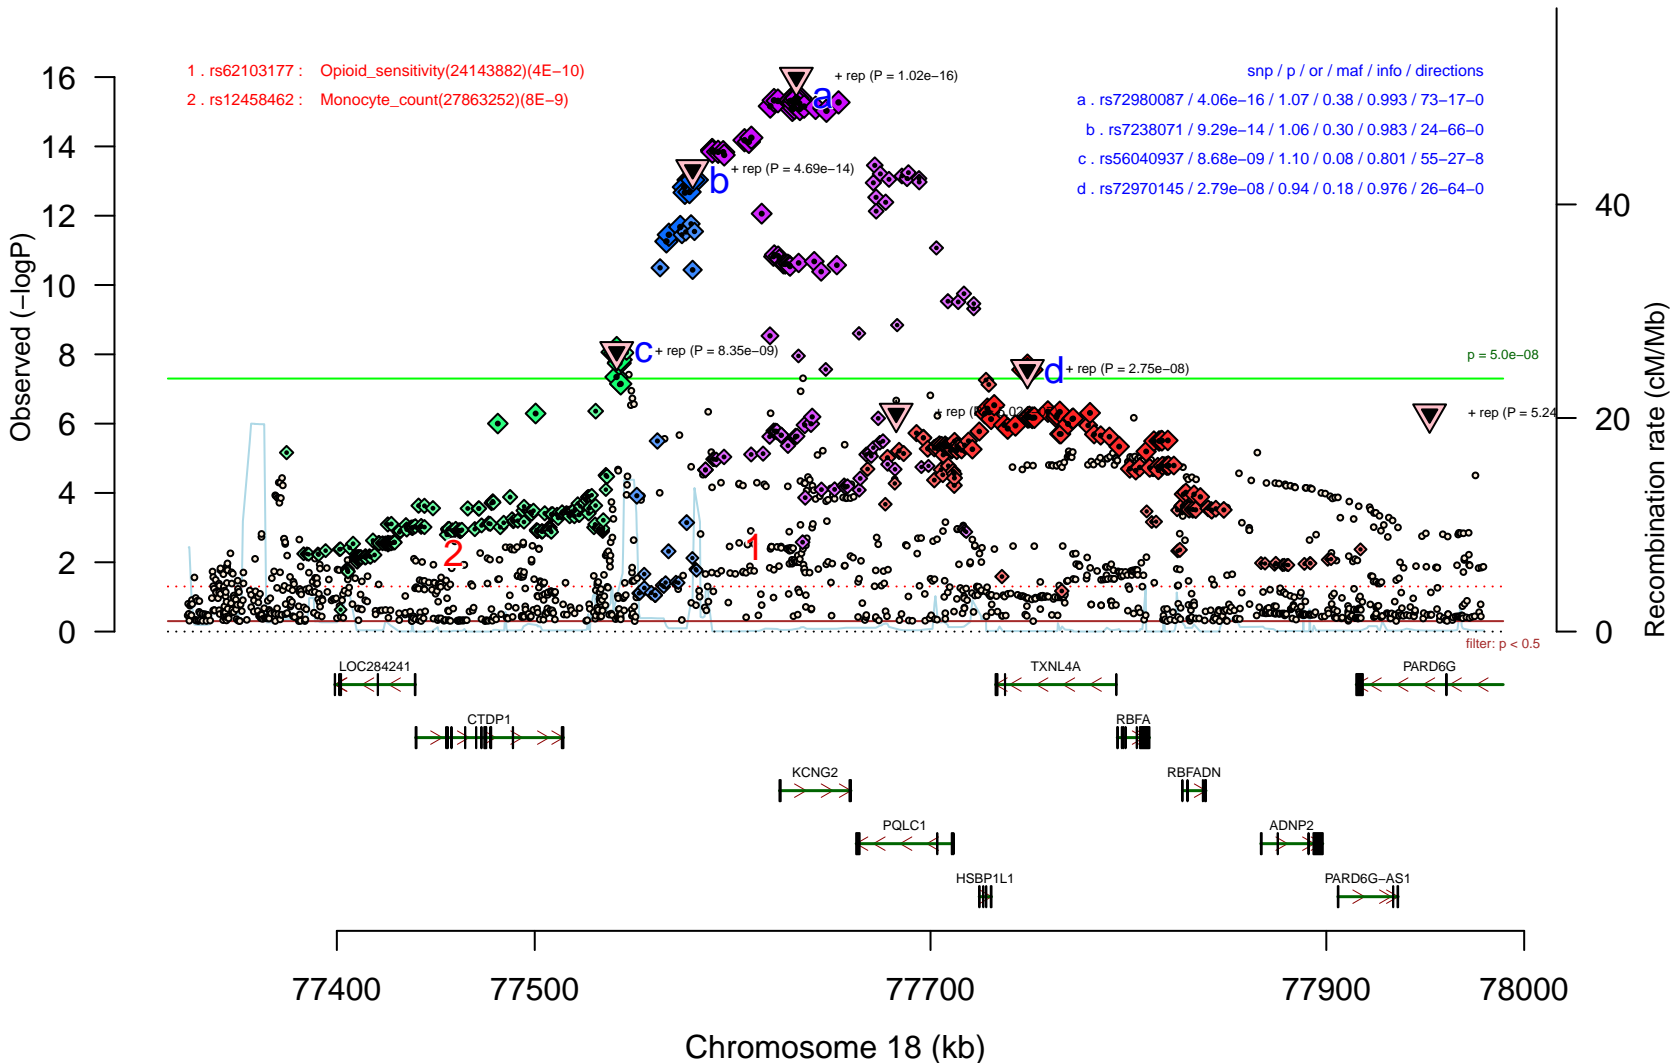

# PGC\_SCZ\_w3\_90\_0418b.170.chr11

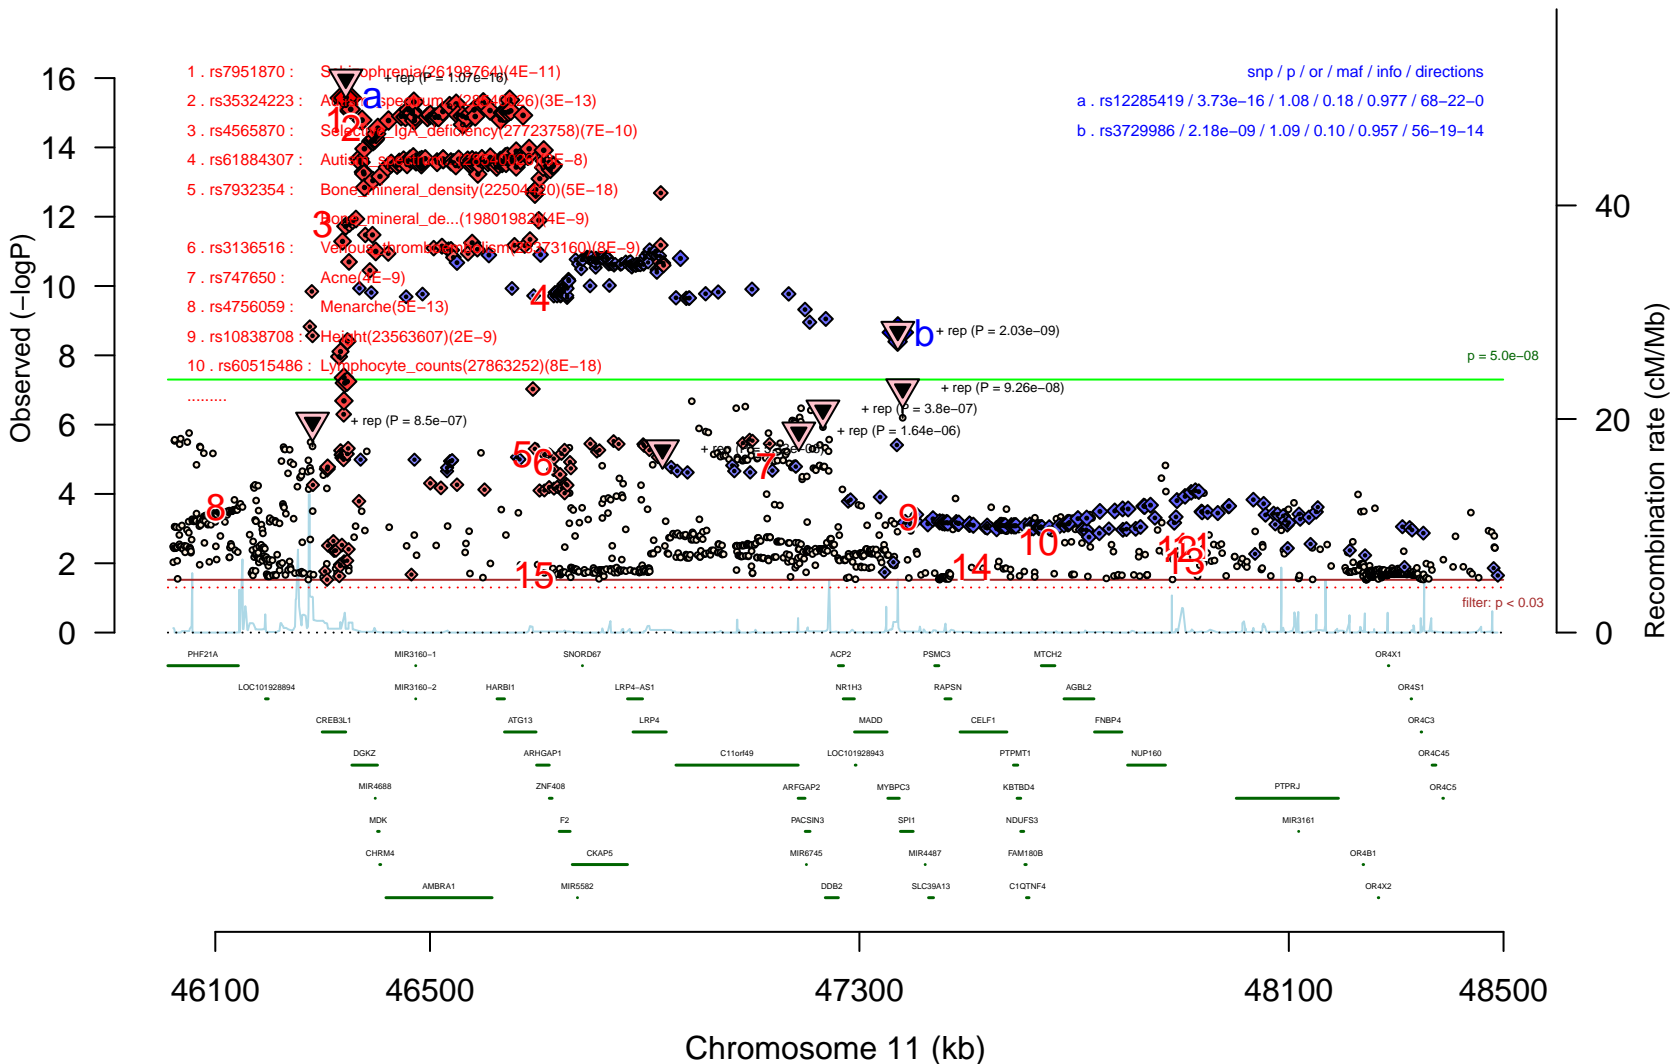

# PGC\_SCZ\_w3\_90\_0418b.174.chr11

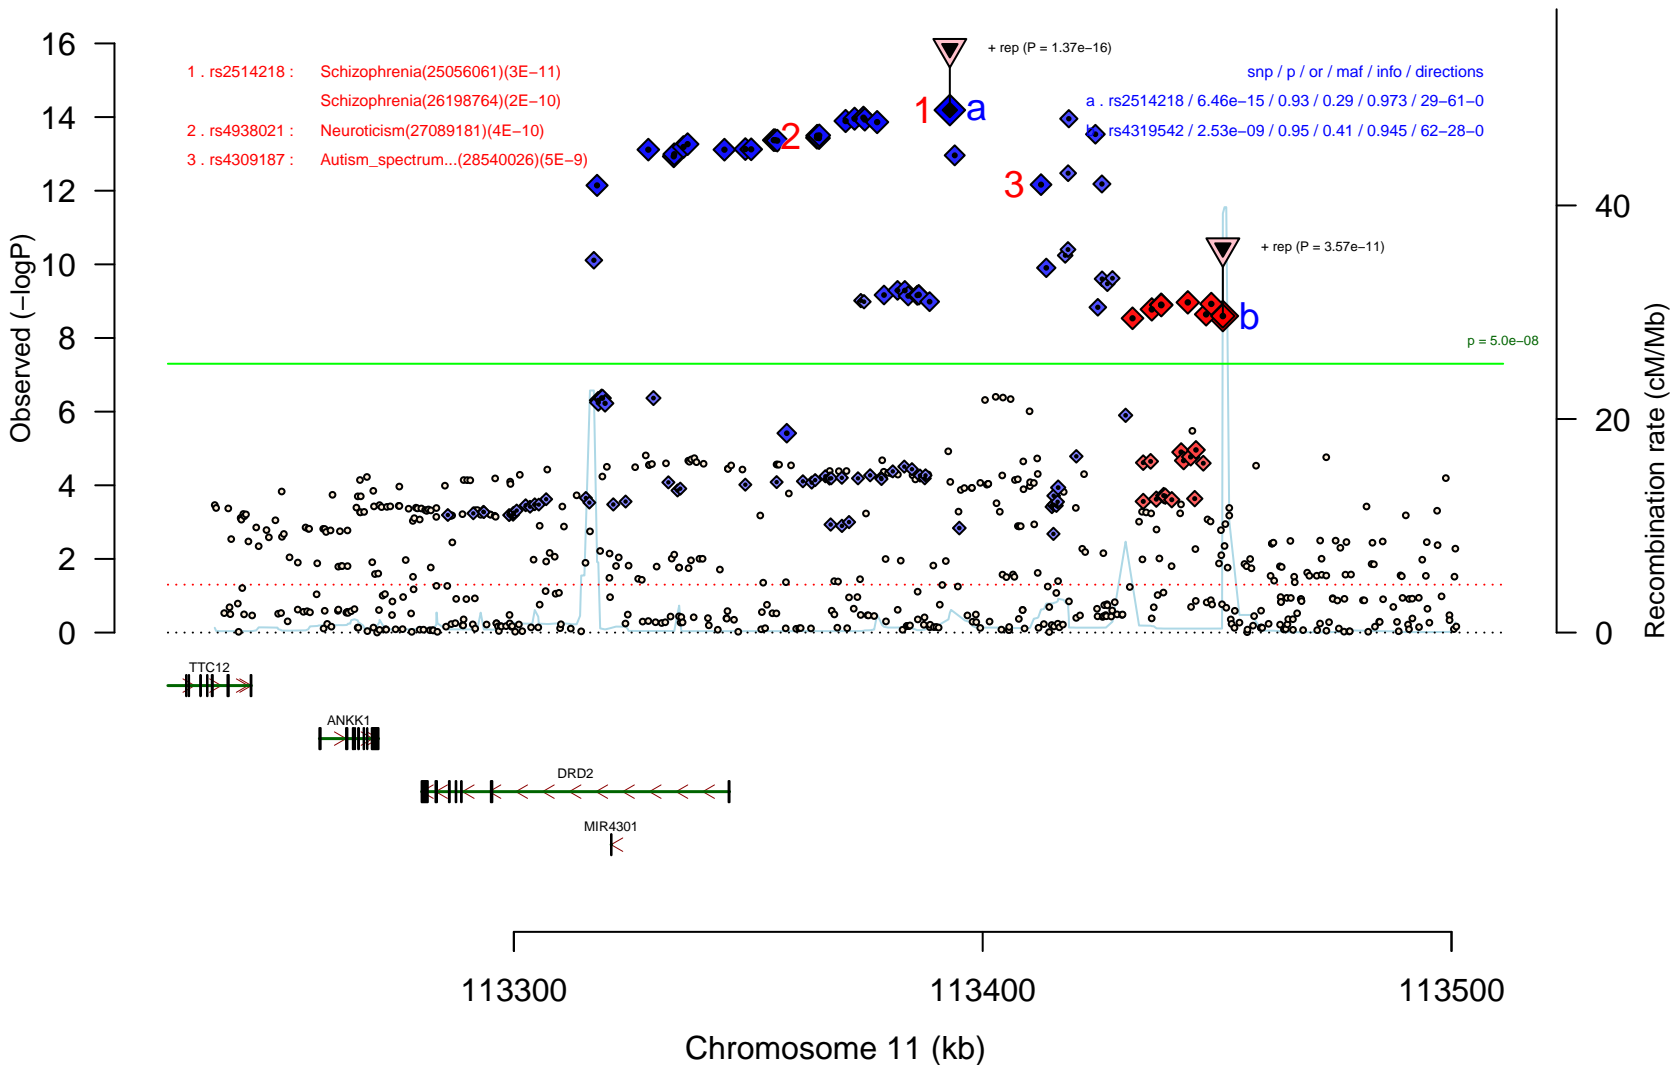

## PGC SCZ w3 90 0418b.49.chr2

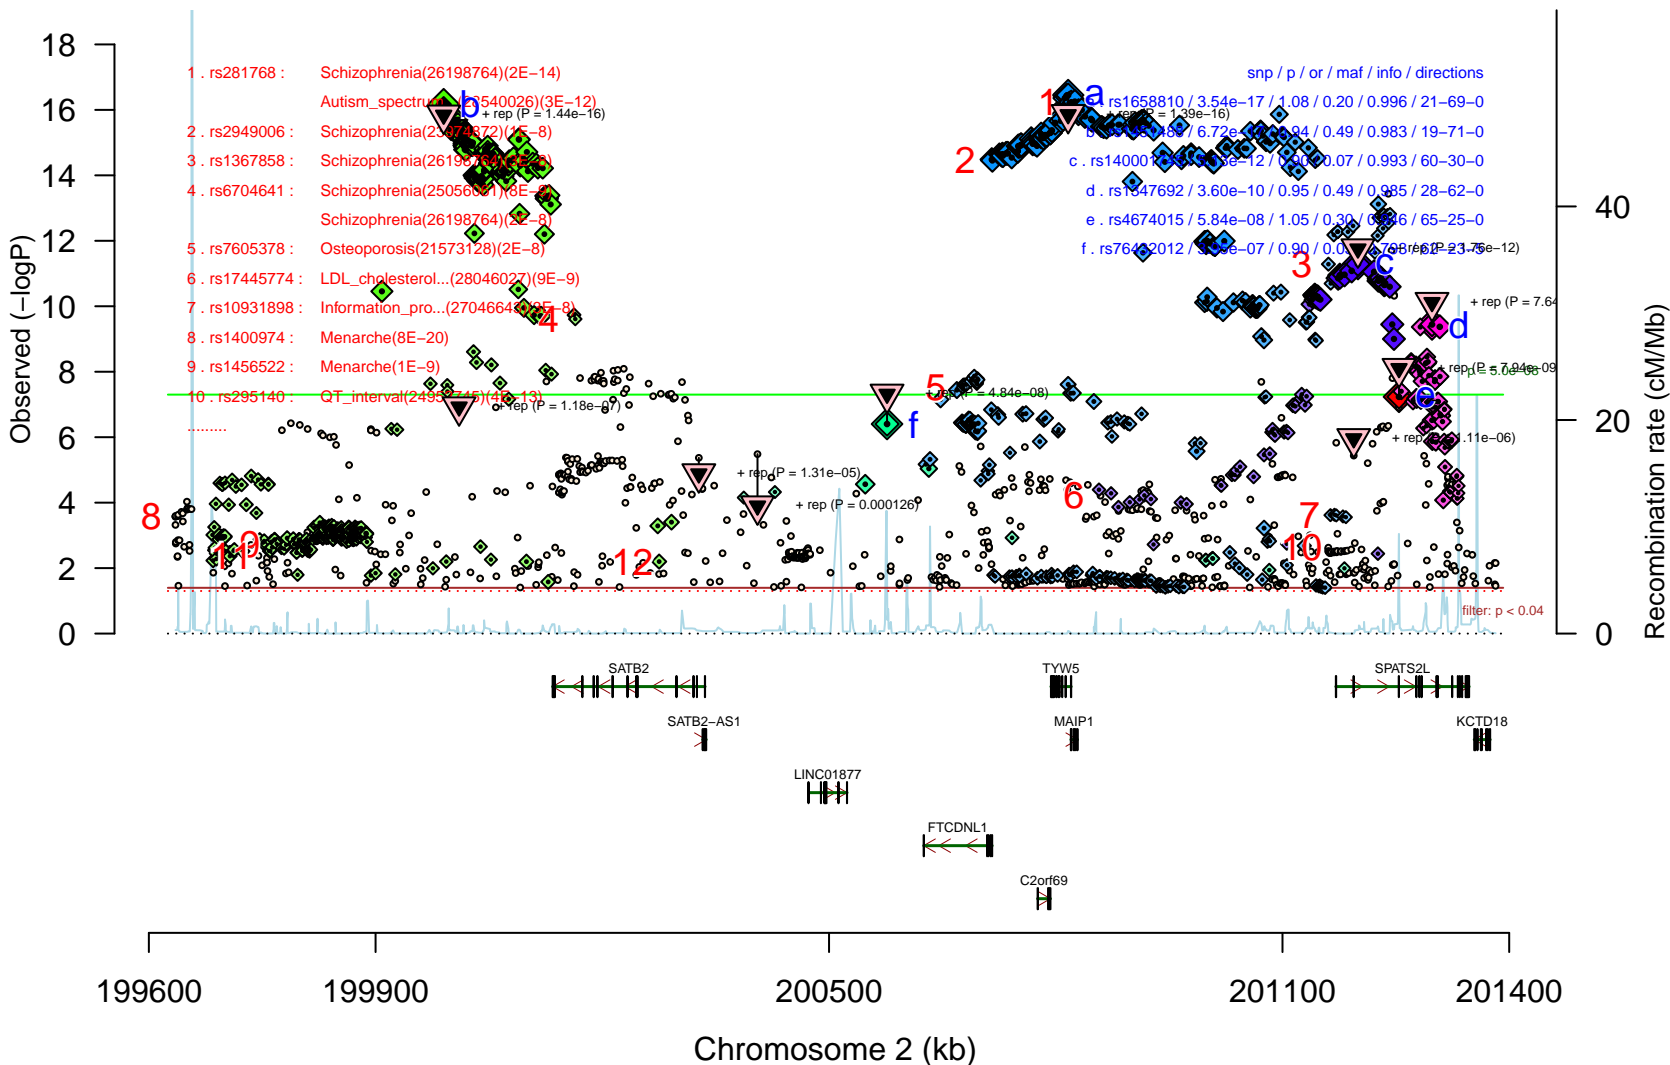

# PGC\_SCZ\_w3\_90\_0418b.7.chr1

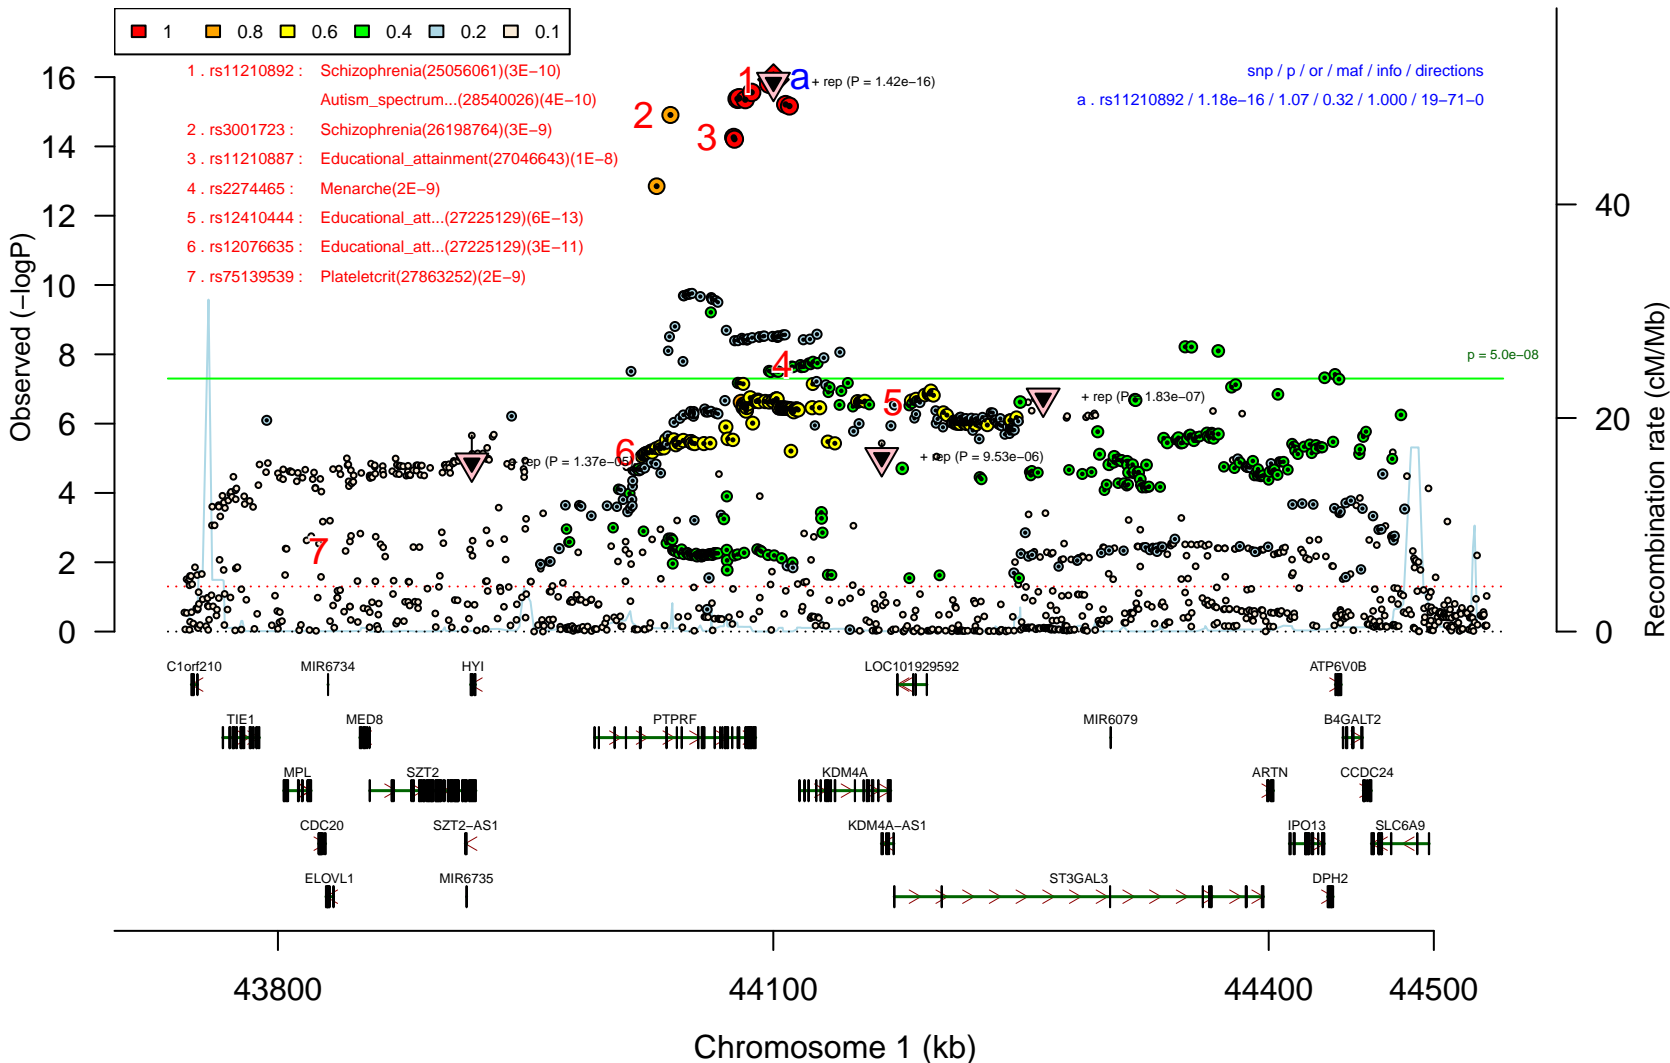

# PGC\_SCZ\_w3\_90\_0418b.123.chr7

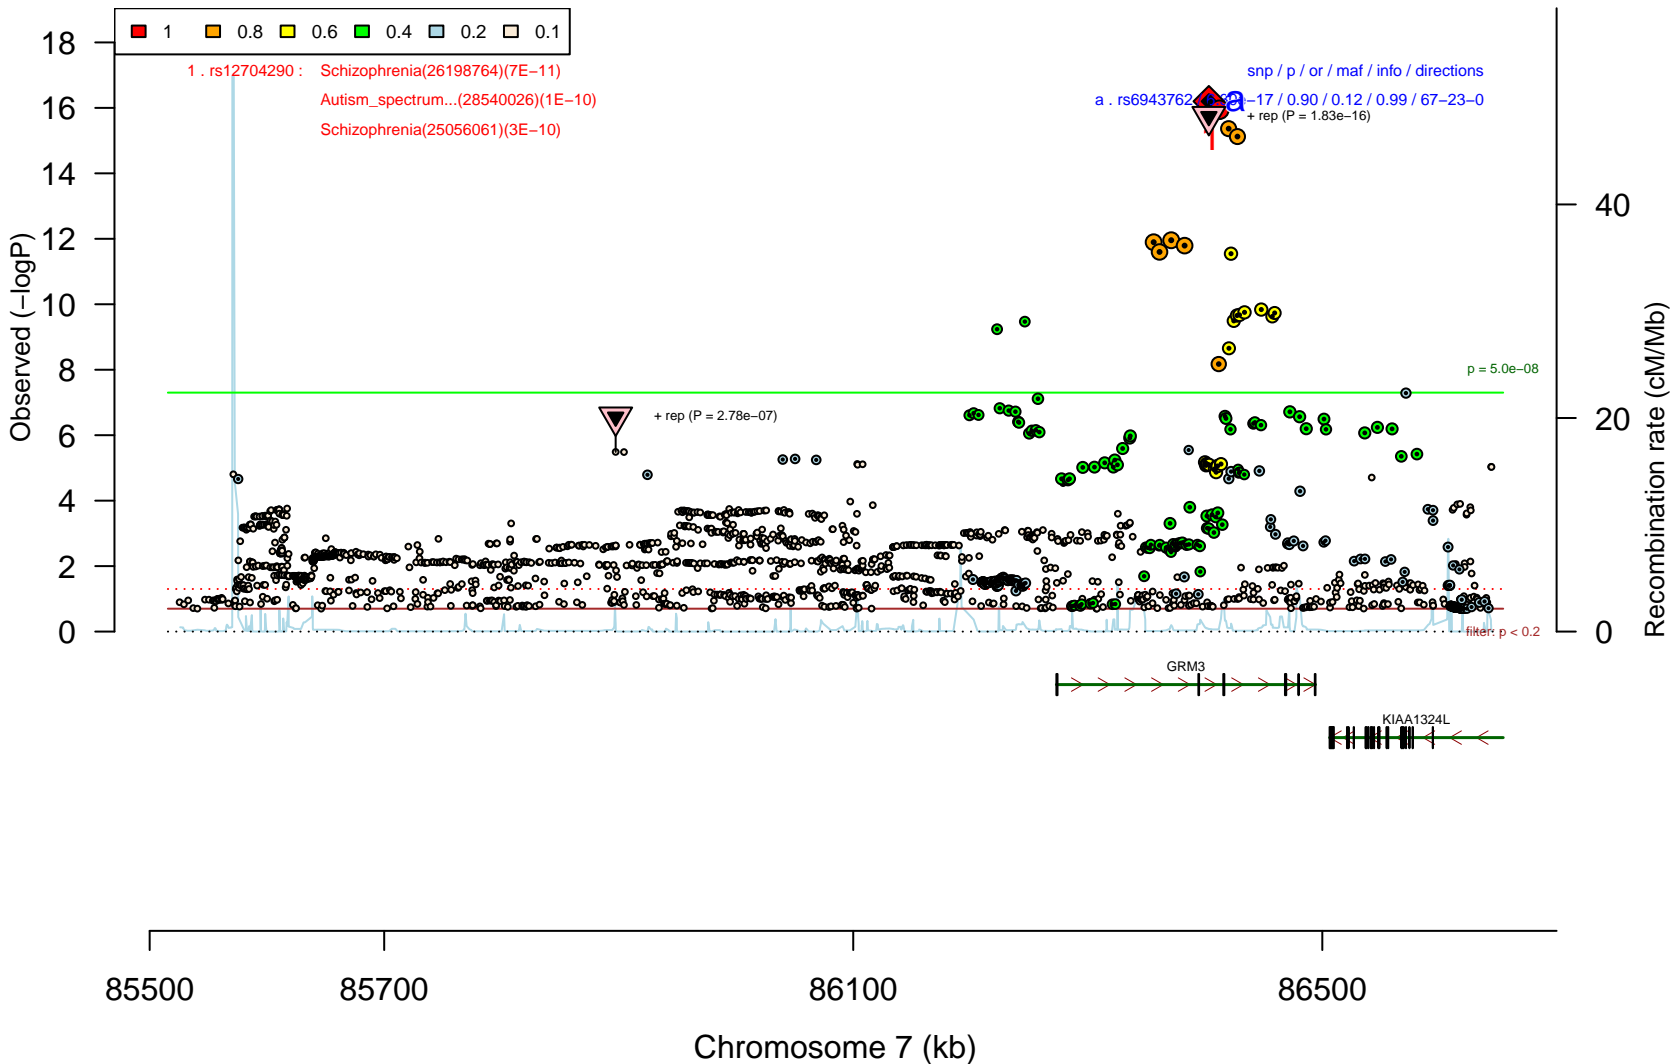



# PGC\_SCZ\_w3\_90\_0418b.160.chr10

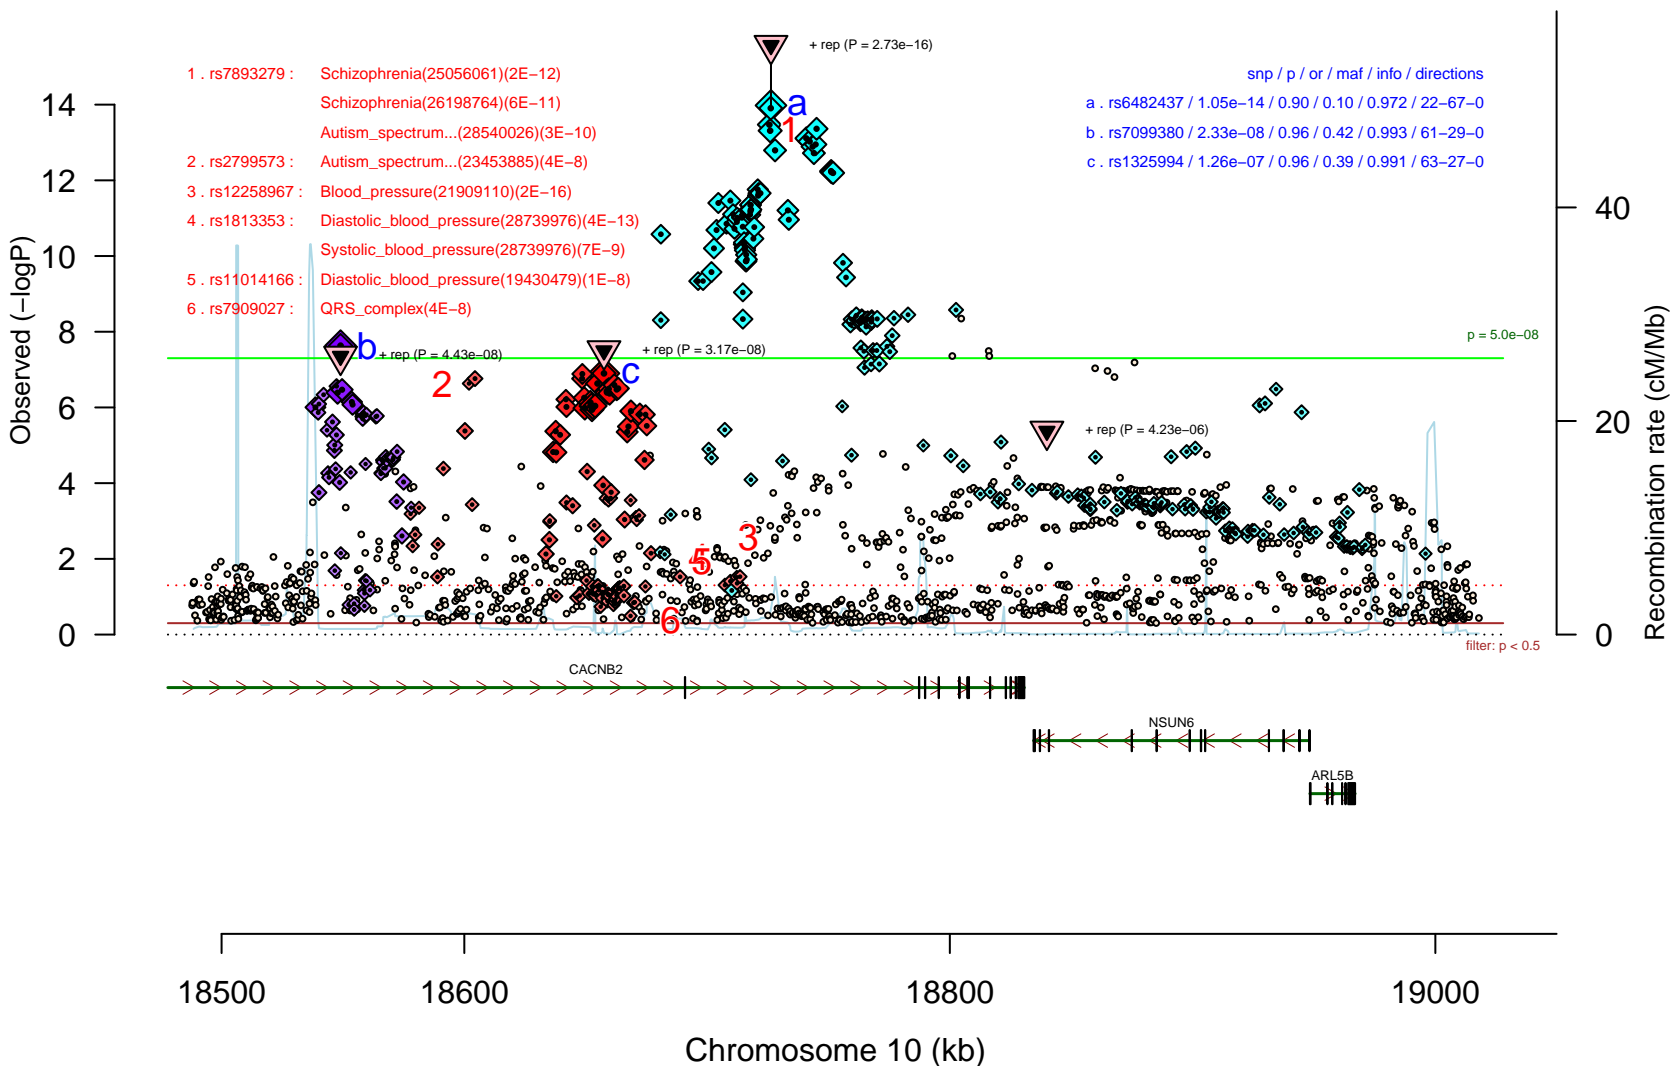

# PGC\_SCZ\_w3\_90\_0418b.231.chr16

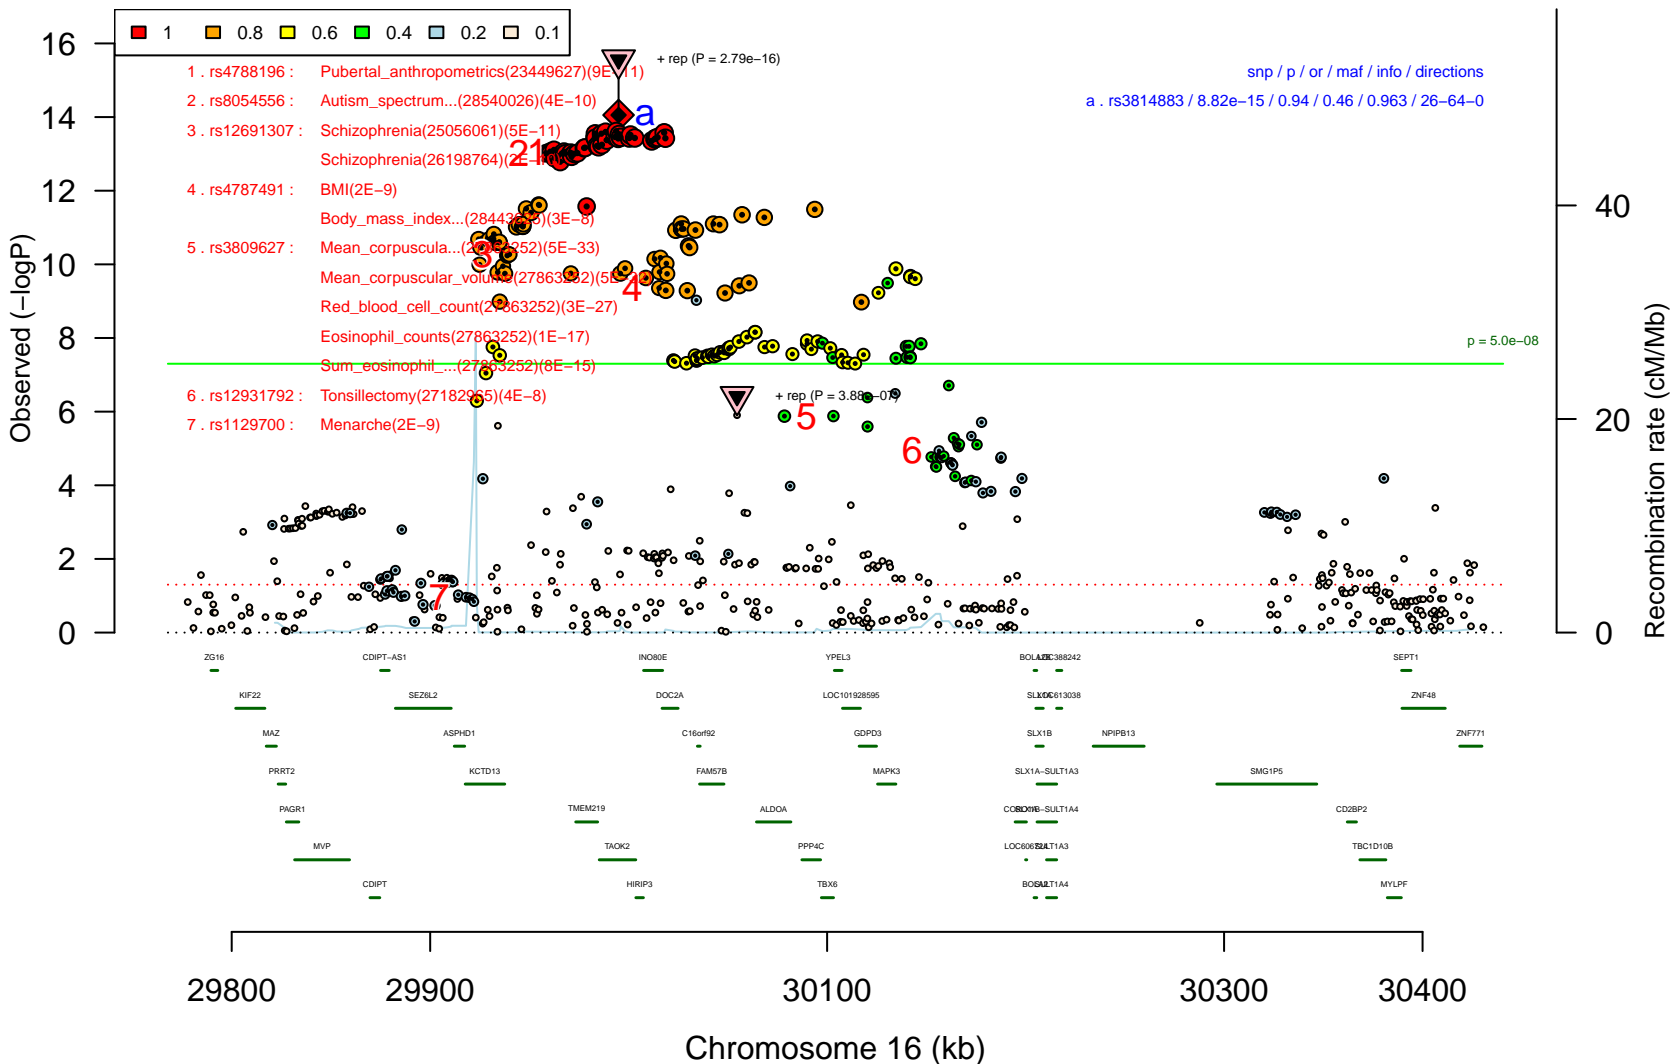

PGC SCZ w3 90 0418b.258.chr20

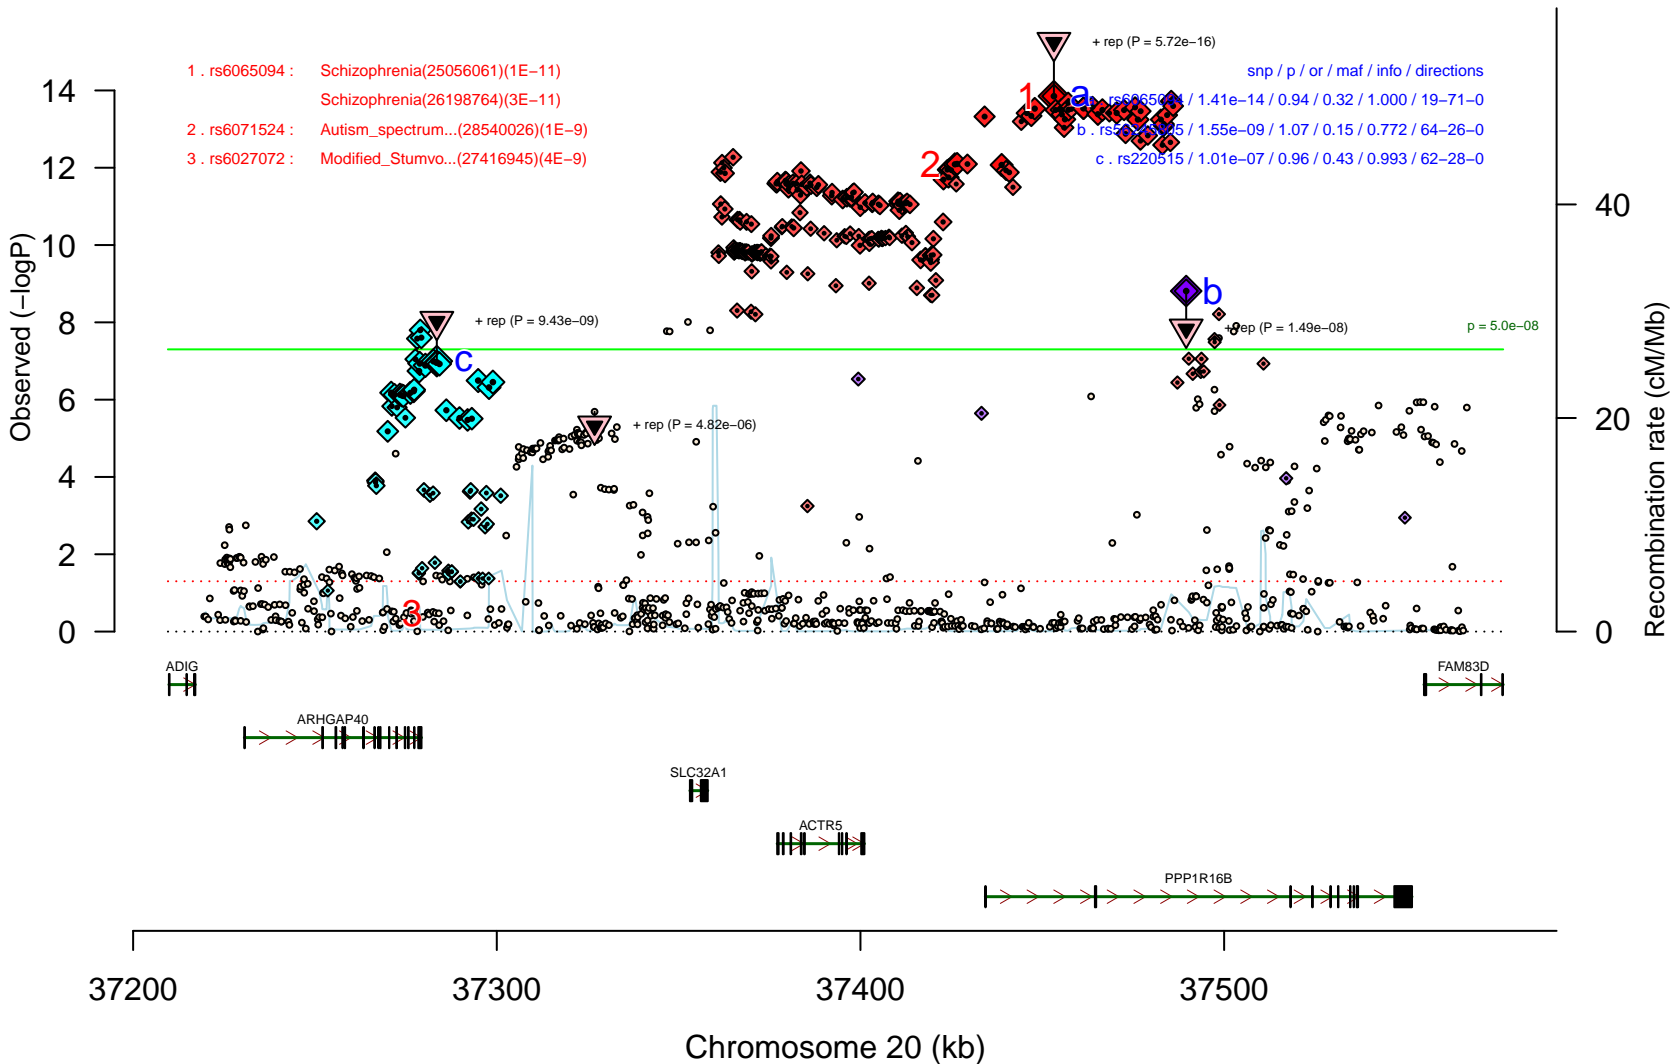

# PGC\_SCZ\_w3\_90\_0418b.222.chr15

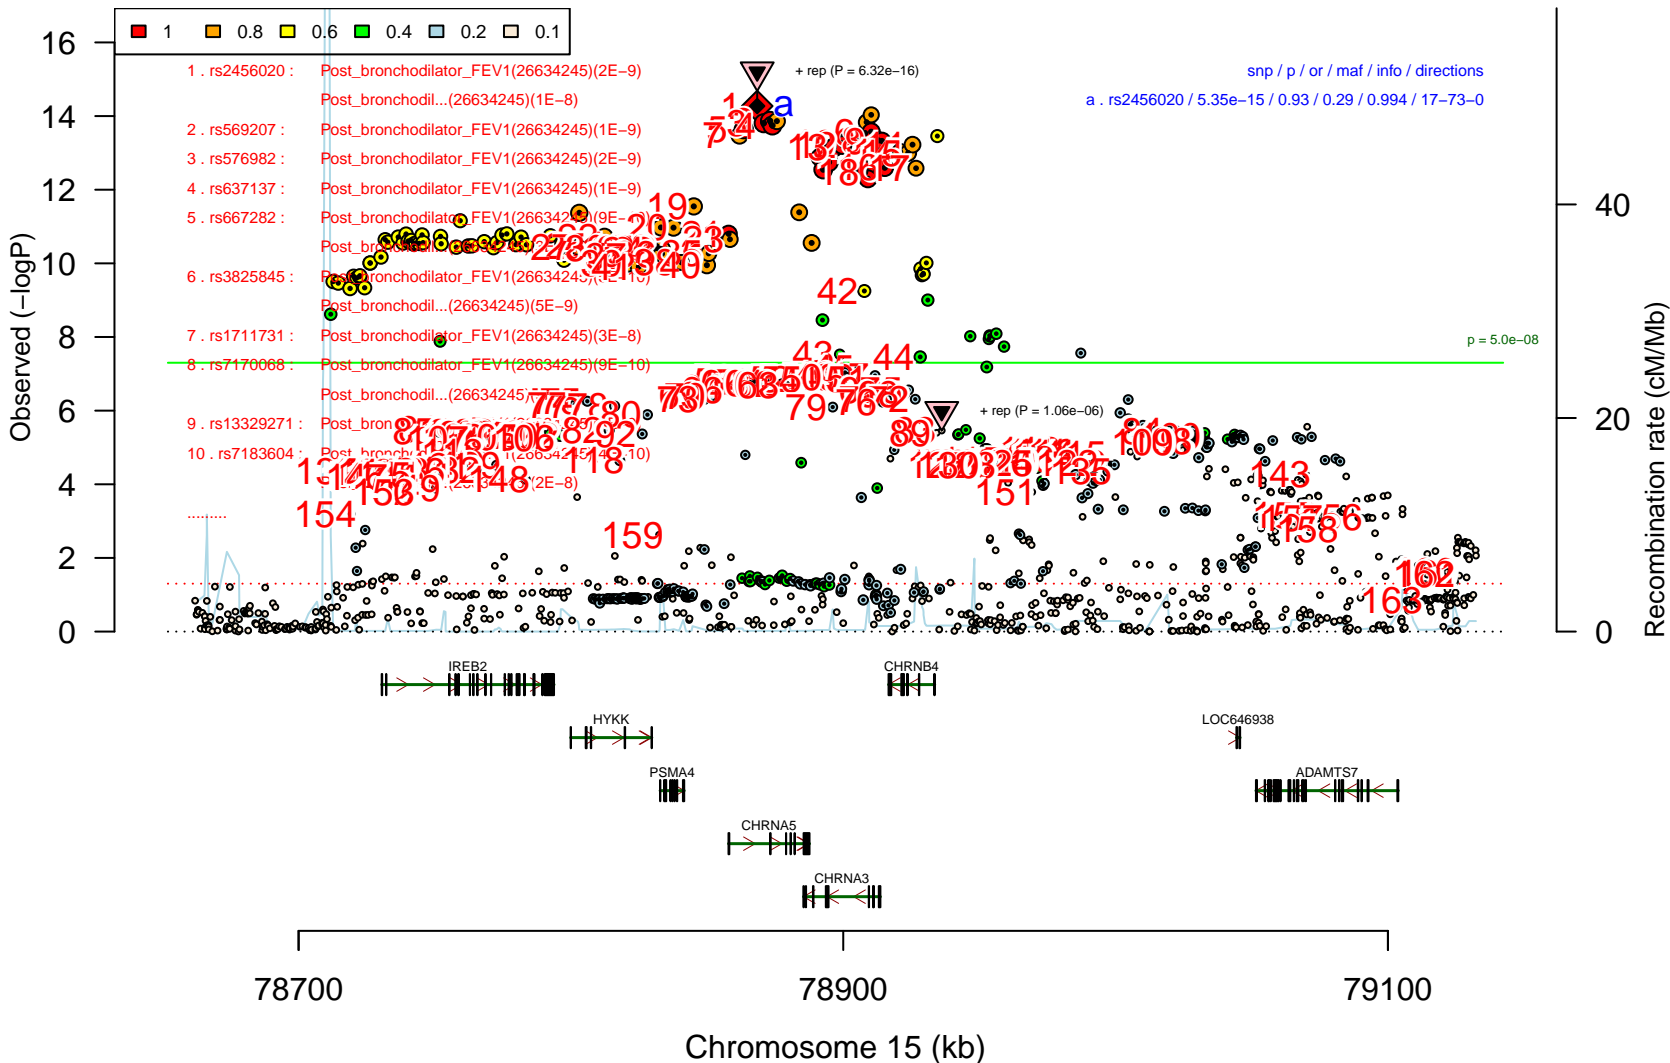

# PGC\_SCZ\_w3\_90\_0418b.82.chr5

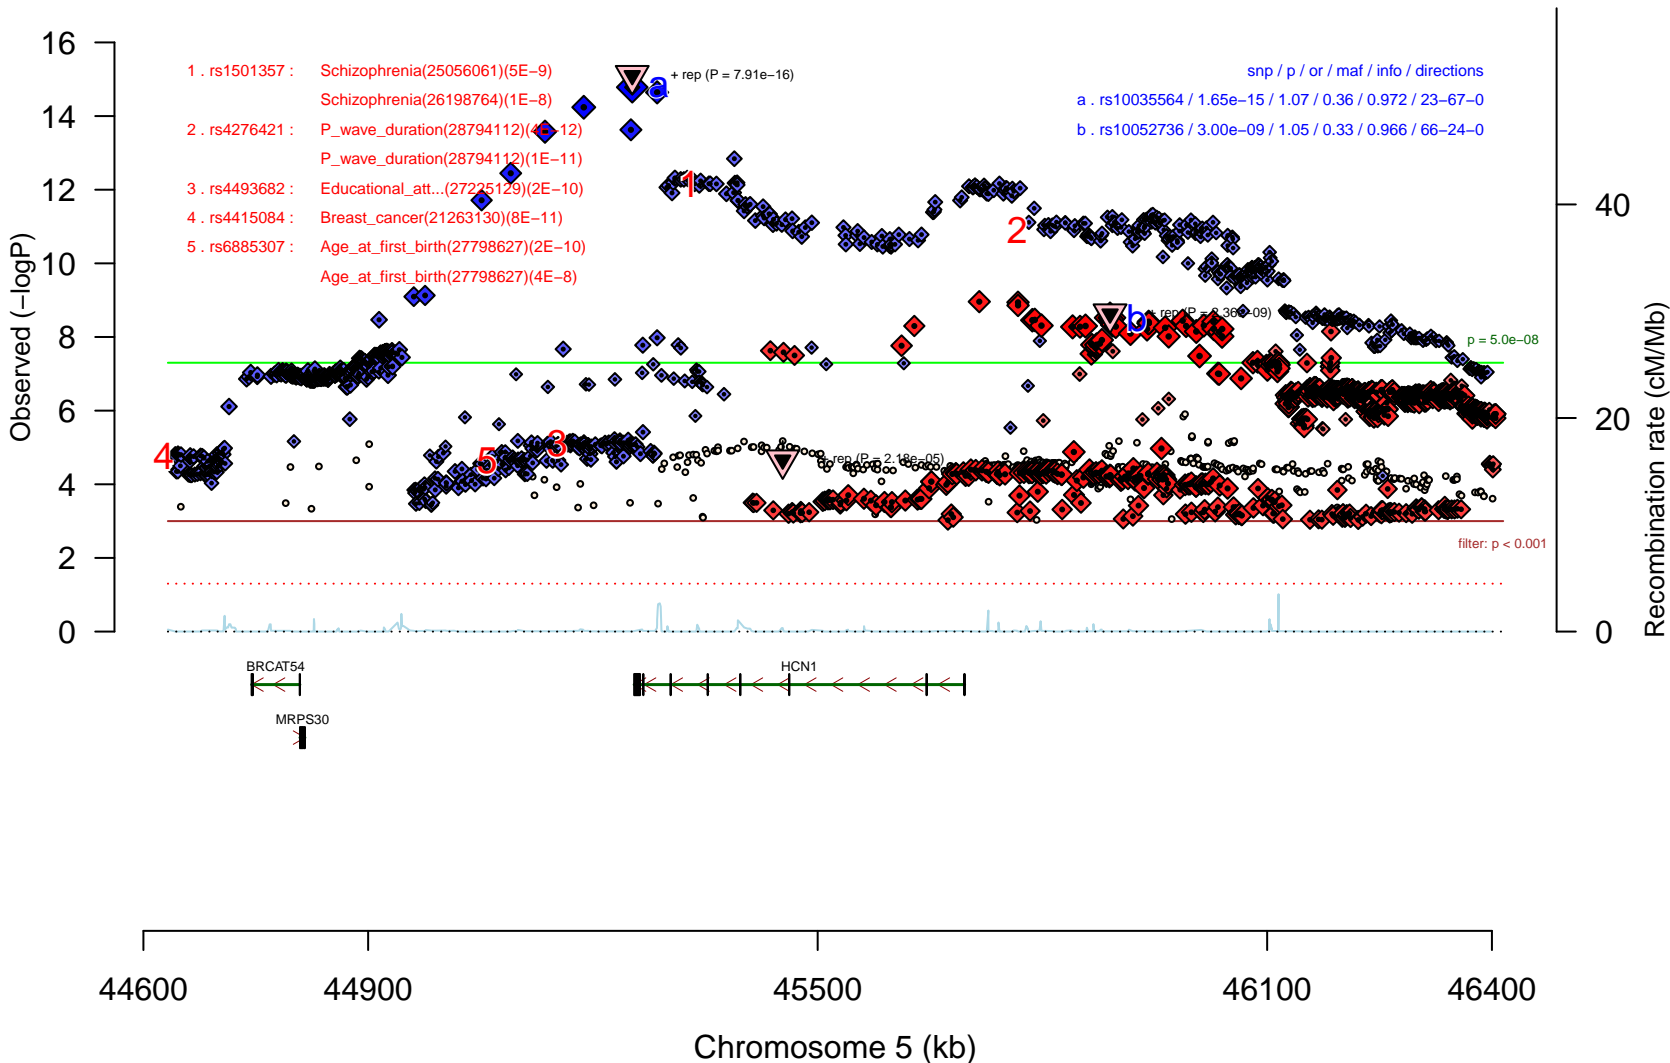

# PGC\_SCZ\_w3\_90\_0418b.253.chr19

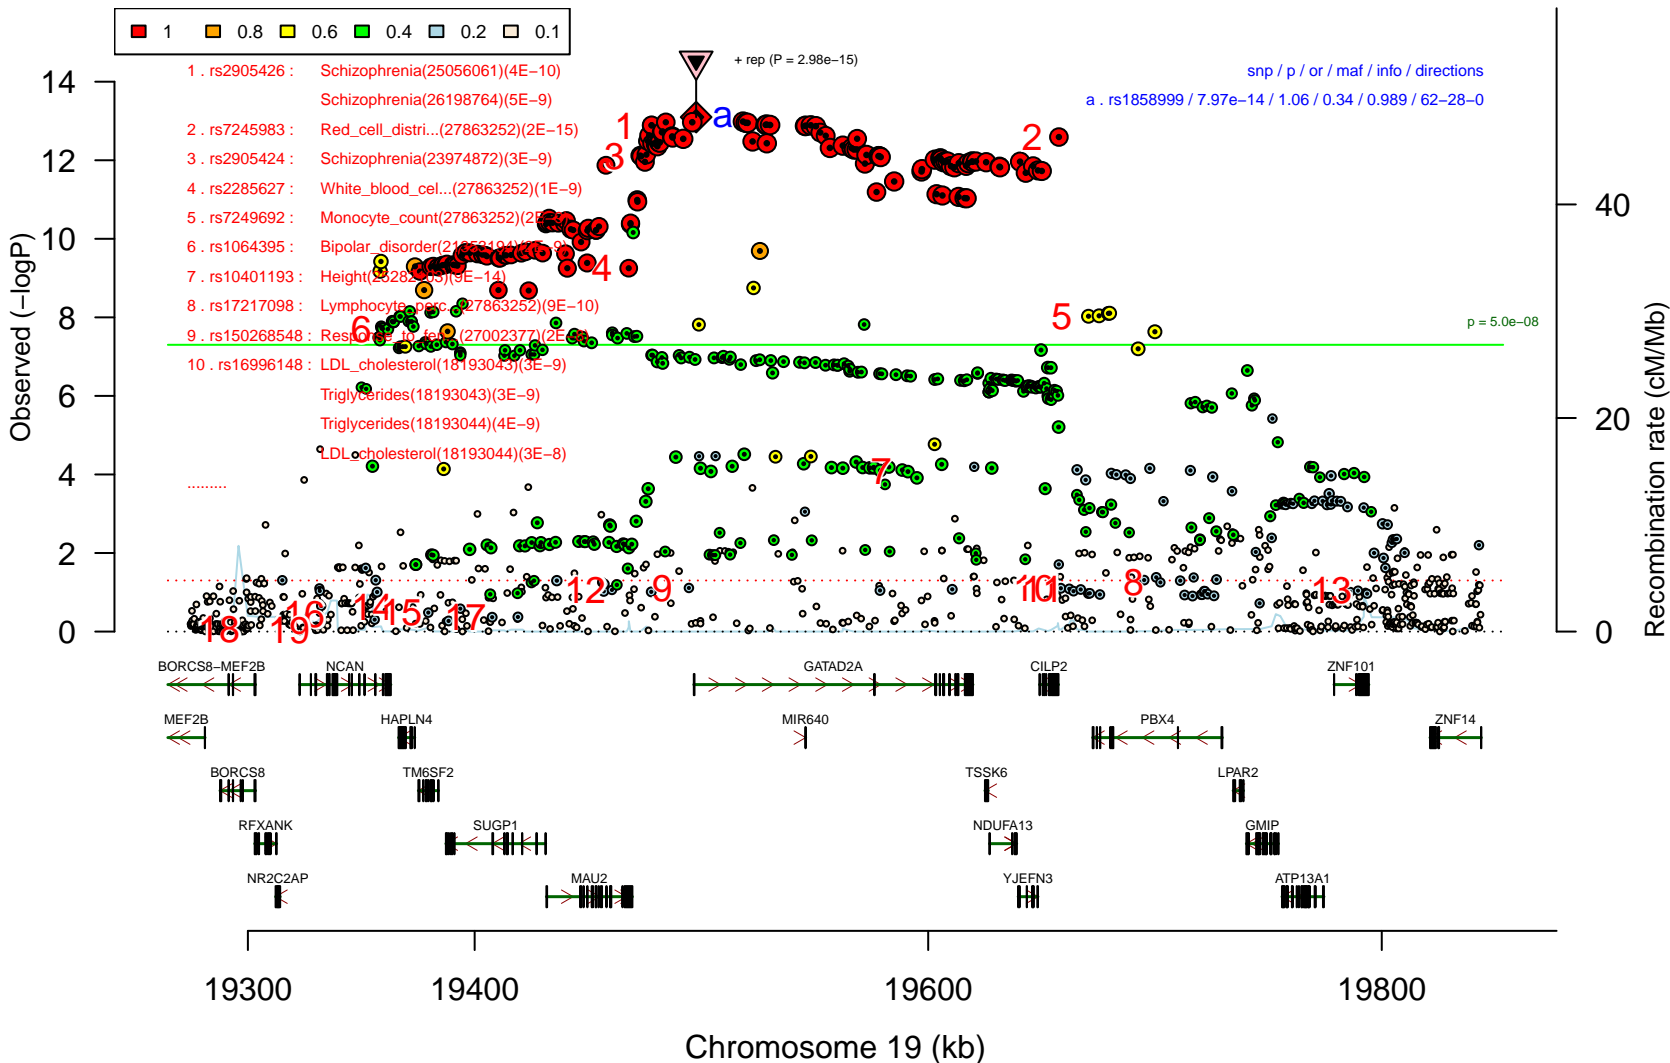

# PGC\_SCZ\_w3\_90\_0418b.187.chr12

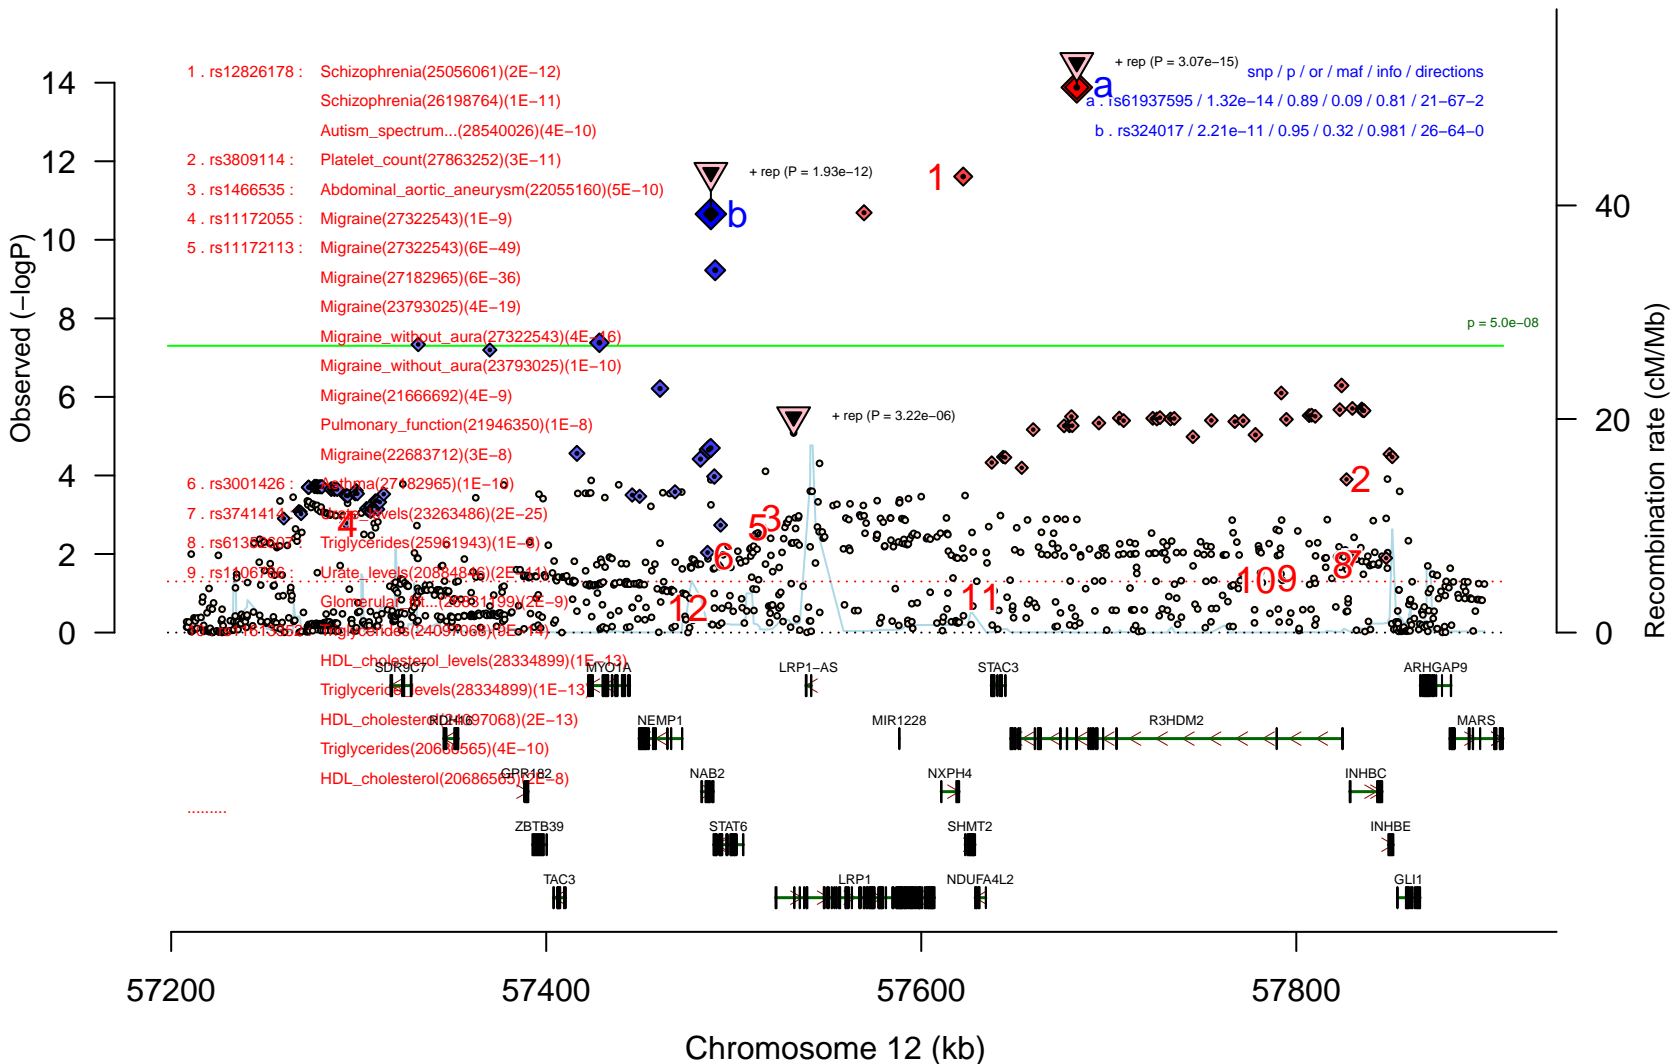

# PGC\_SCZ\_w3\_90\_0418b.255.chr19

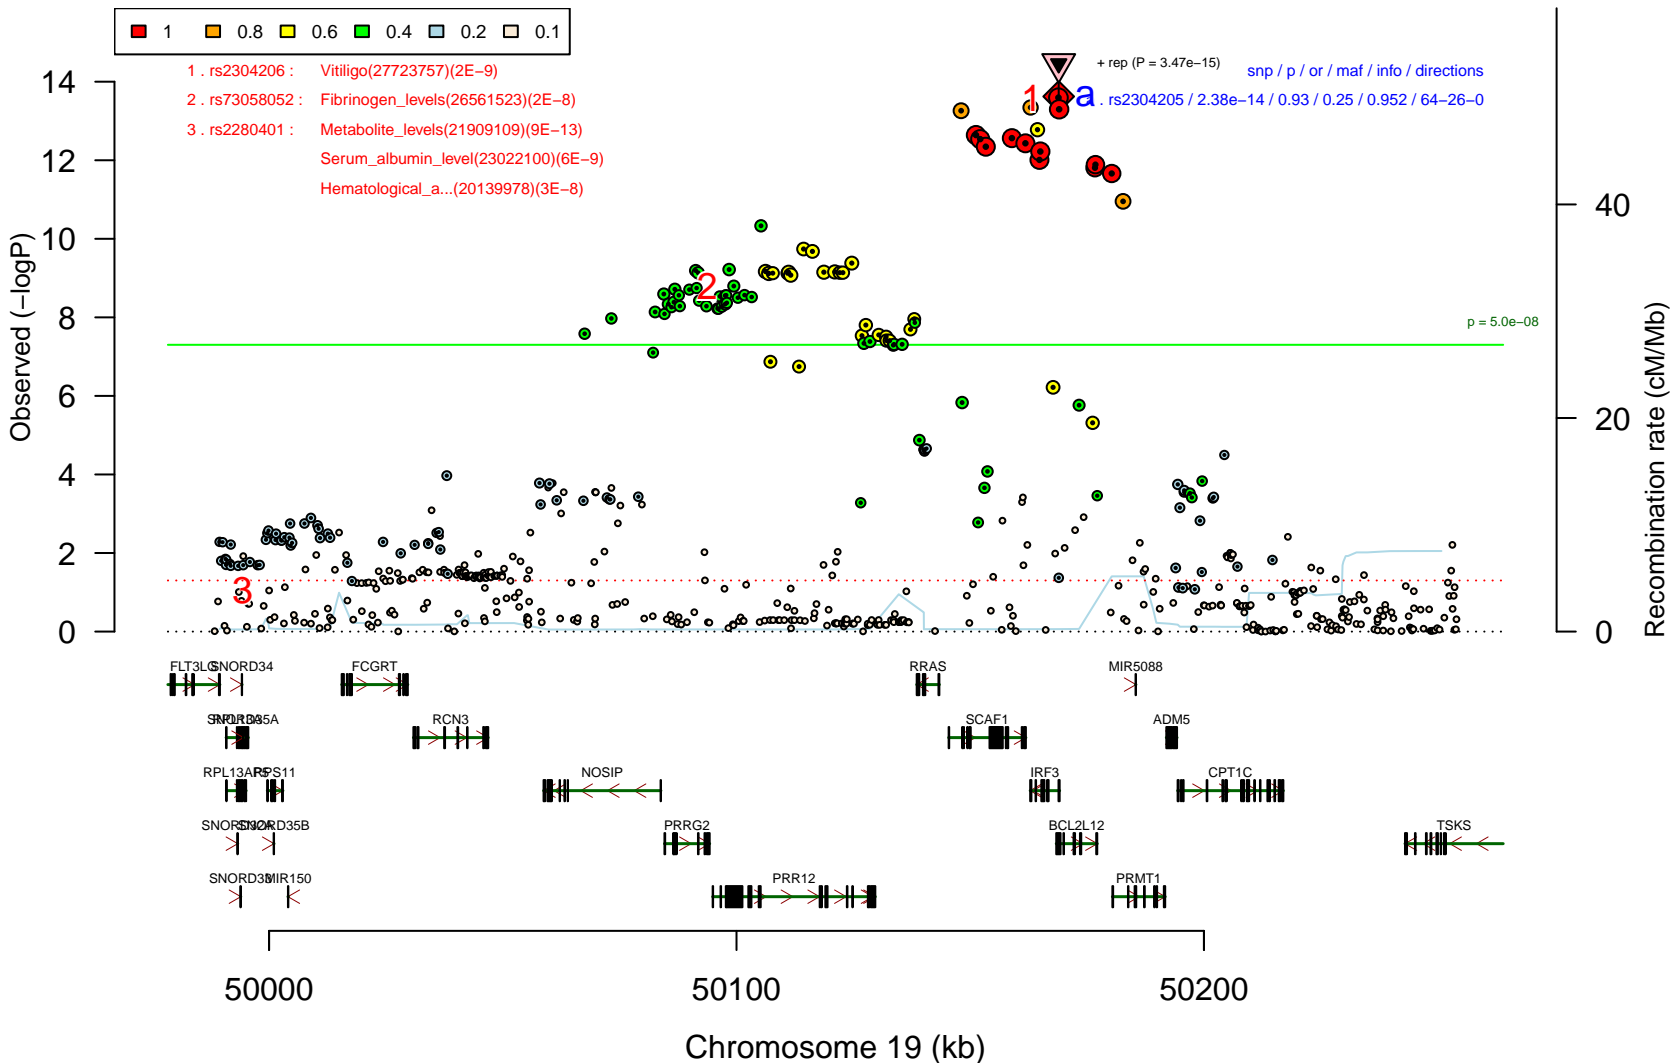



# PGC\_SCZ\_w3\_90\_0418b.179.chr11

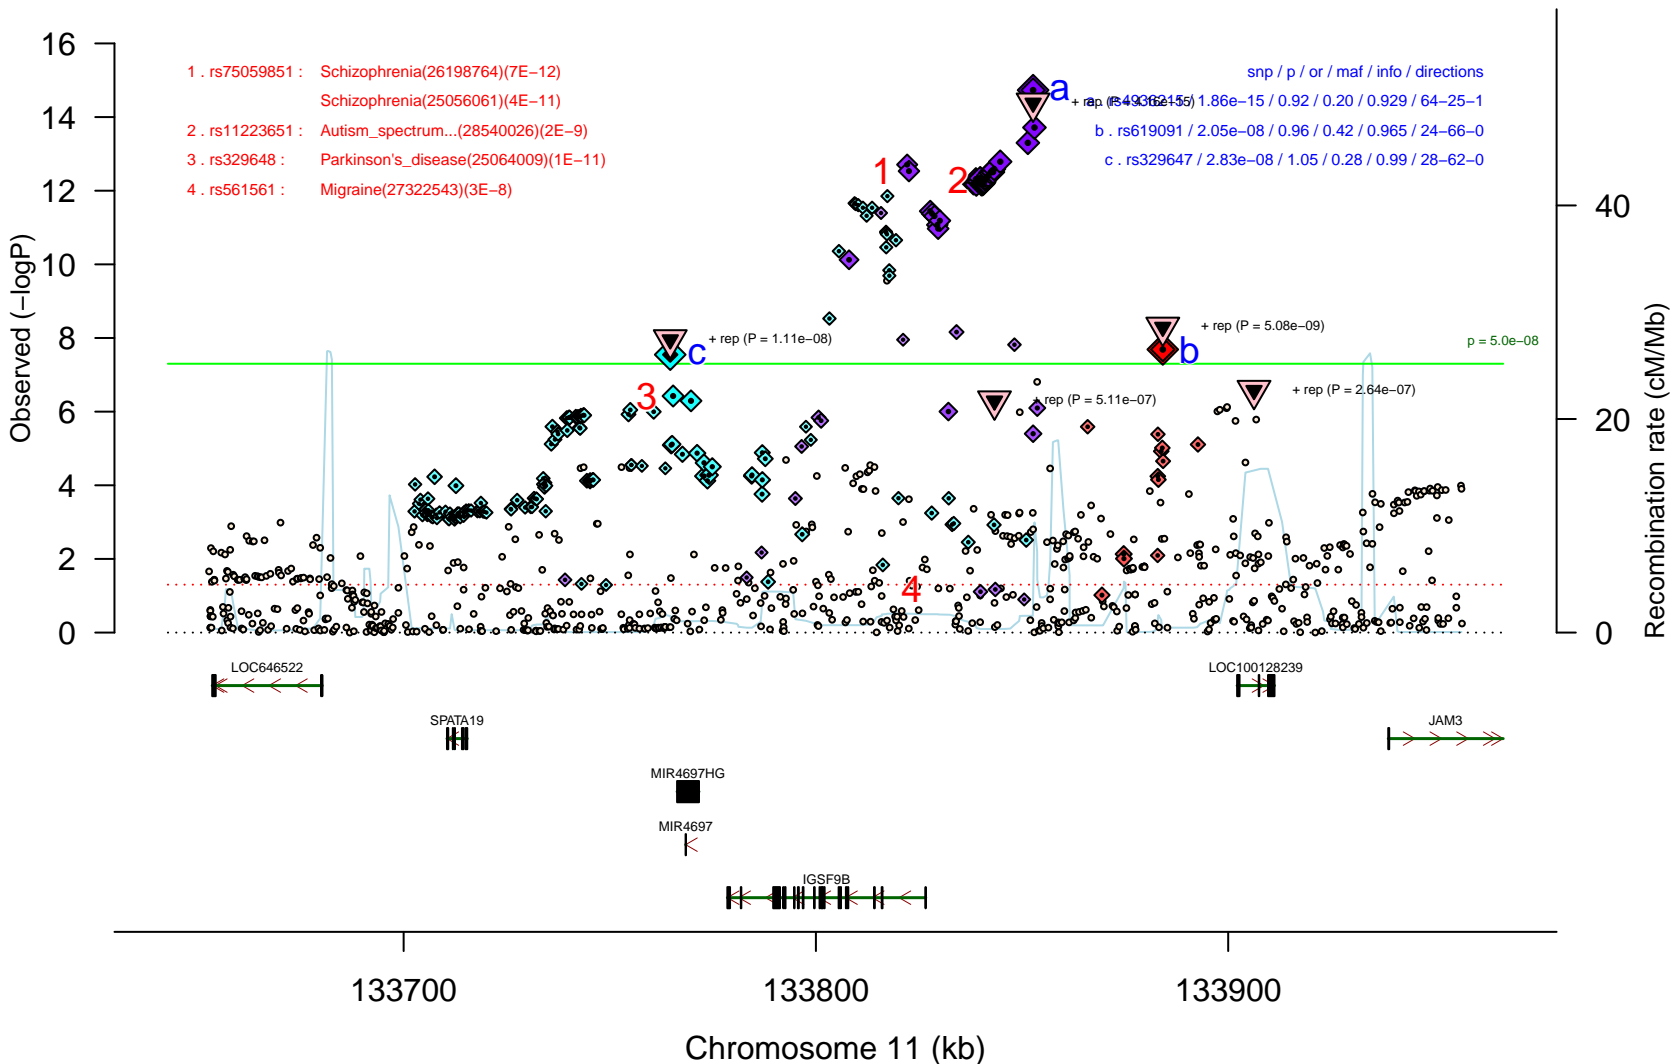

# PGC\_SCZ\_w3\_90\_0418b.5.chr1

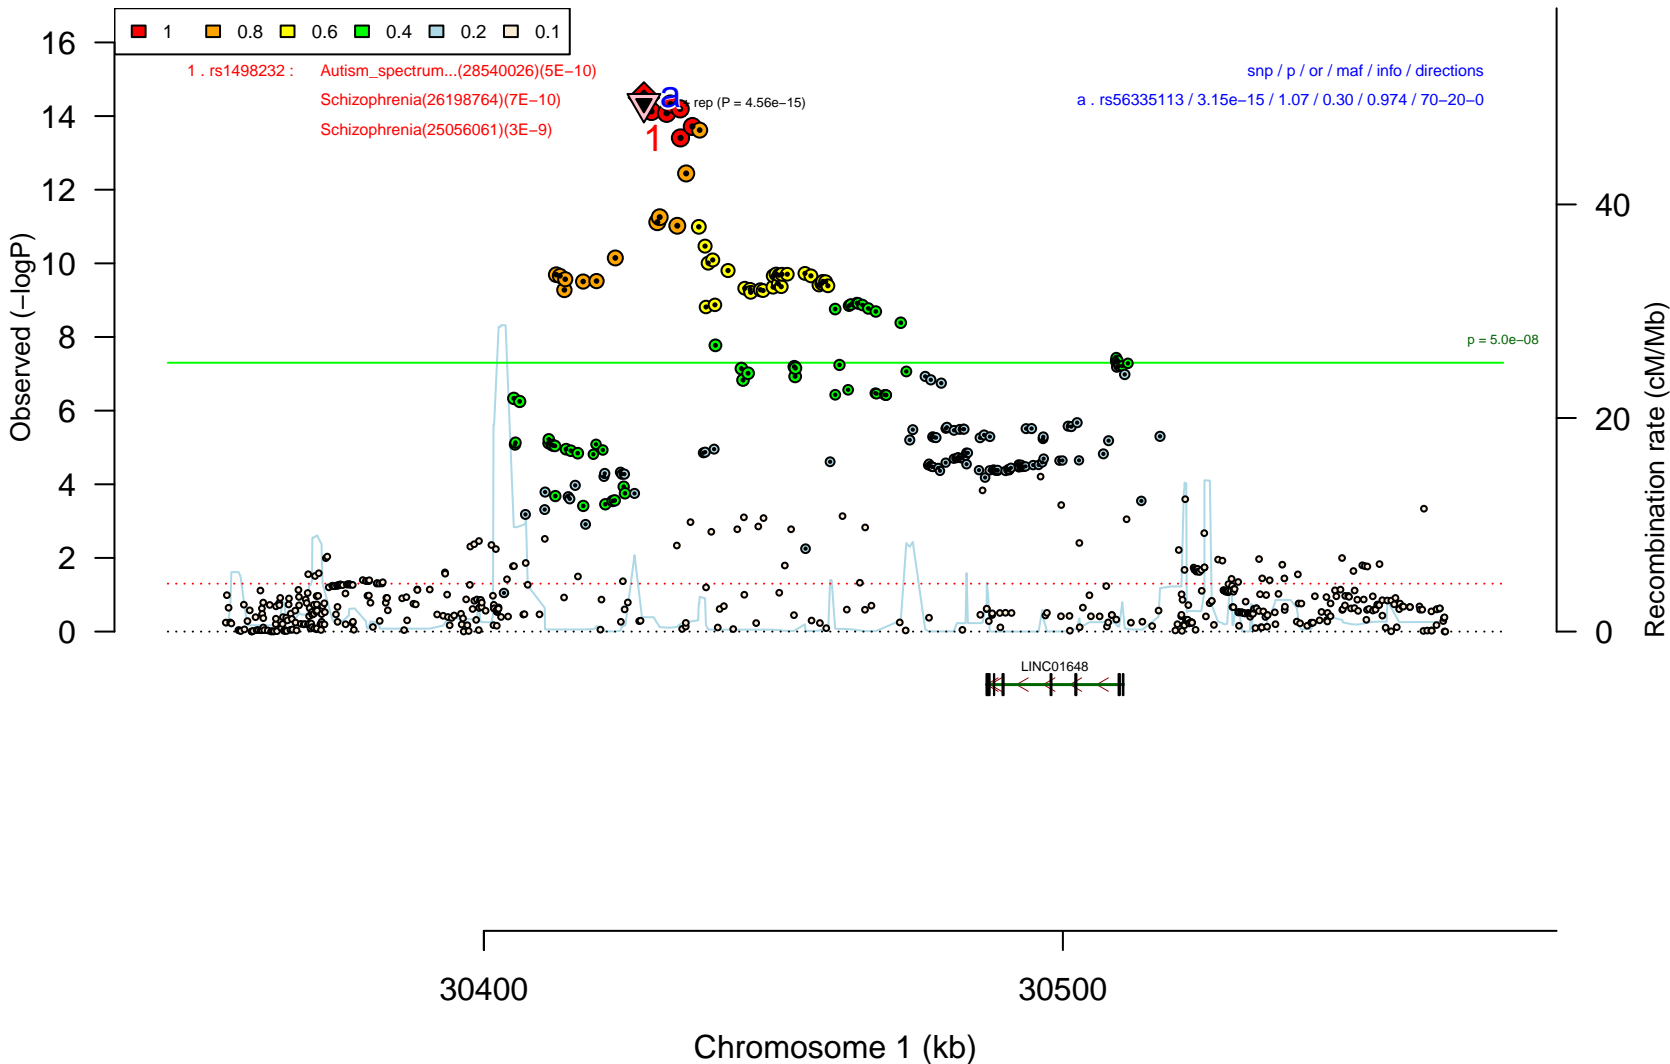

PGC SCZ w3 90 0418b.40.chr2

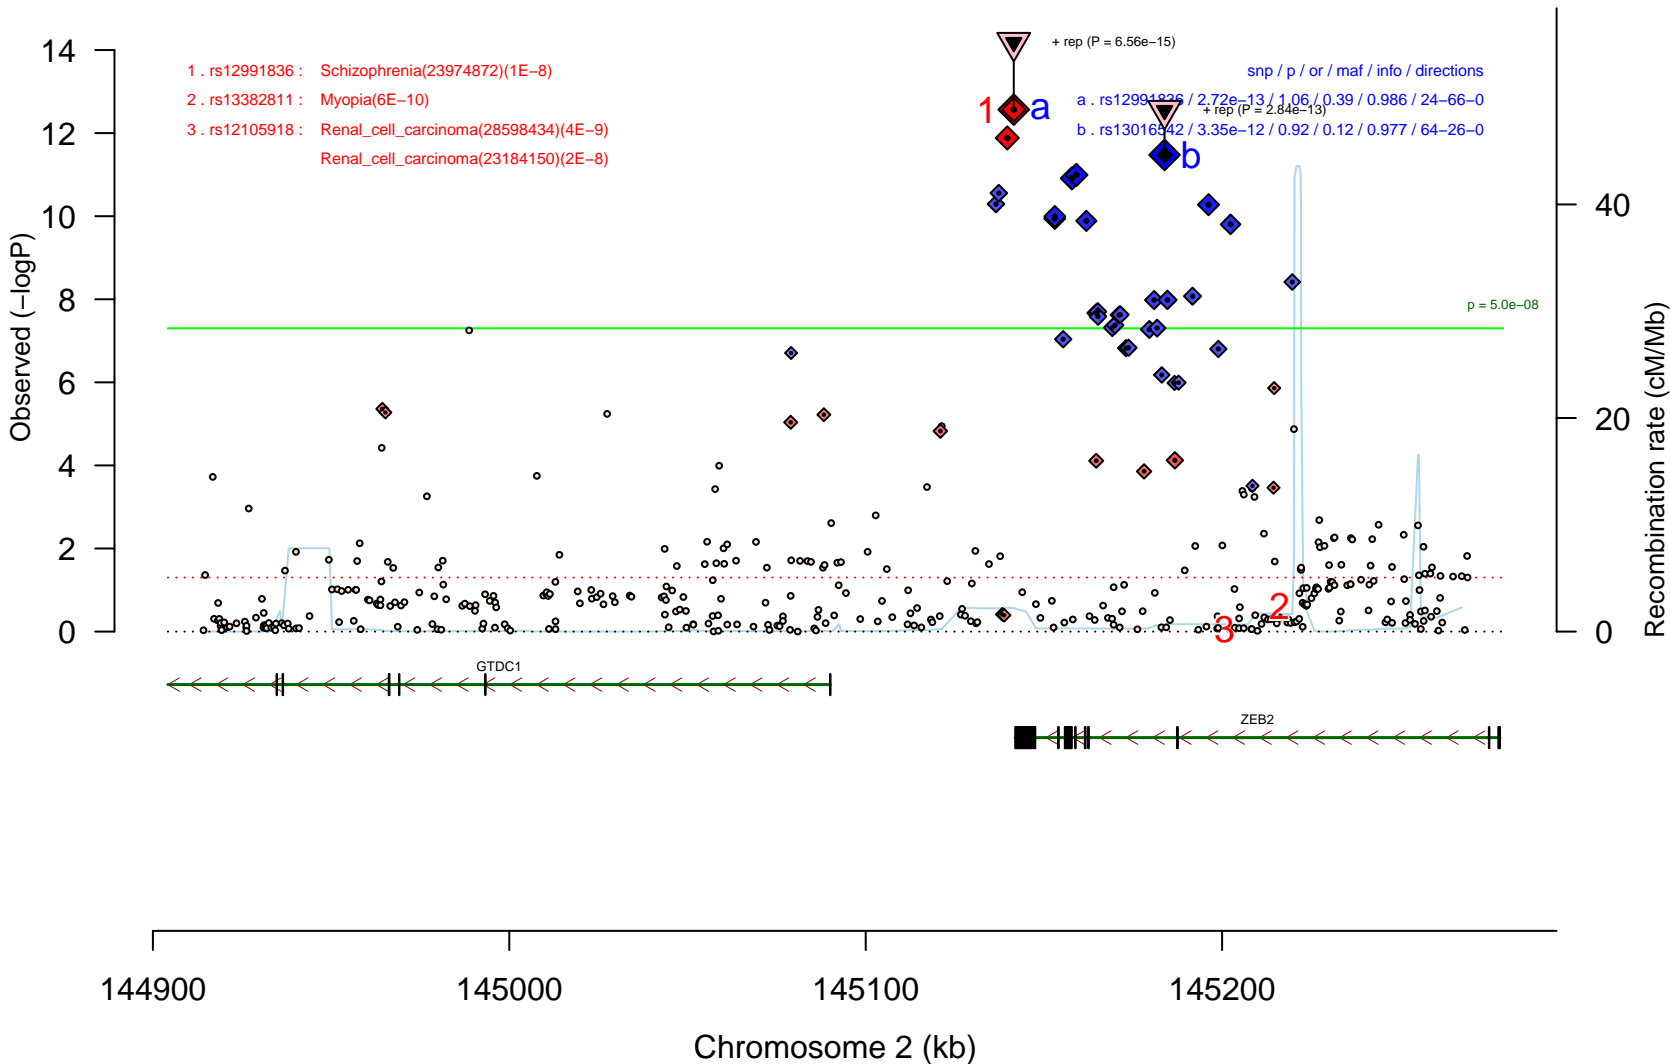

# PGC\_SCZ\_w3\_90\_0418b.79.chr4

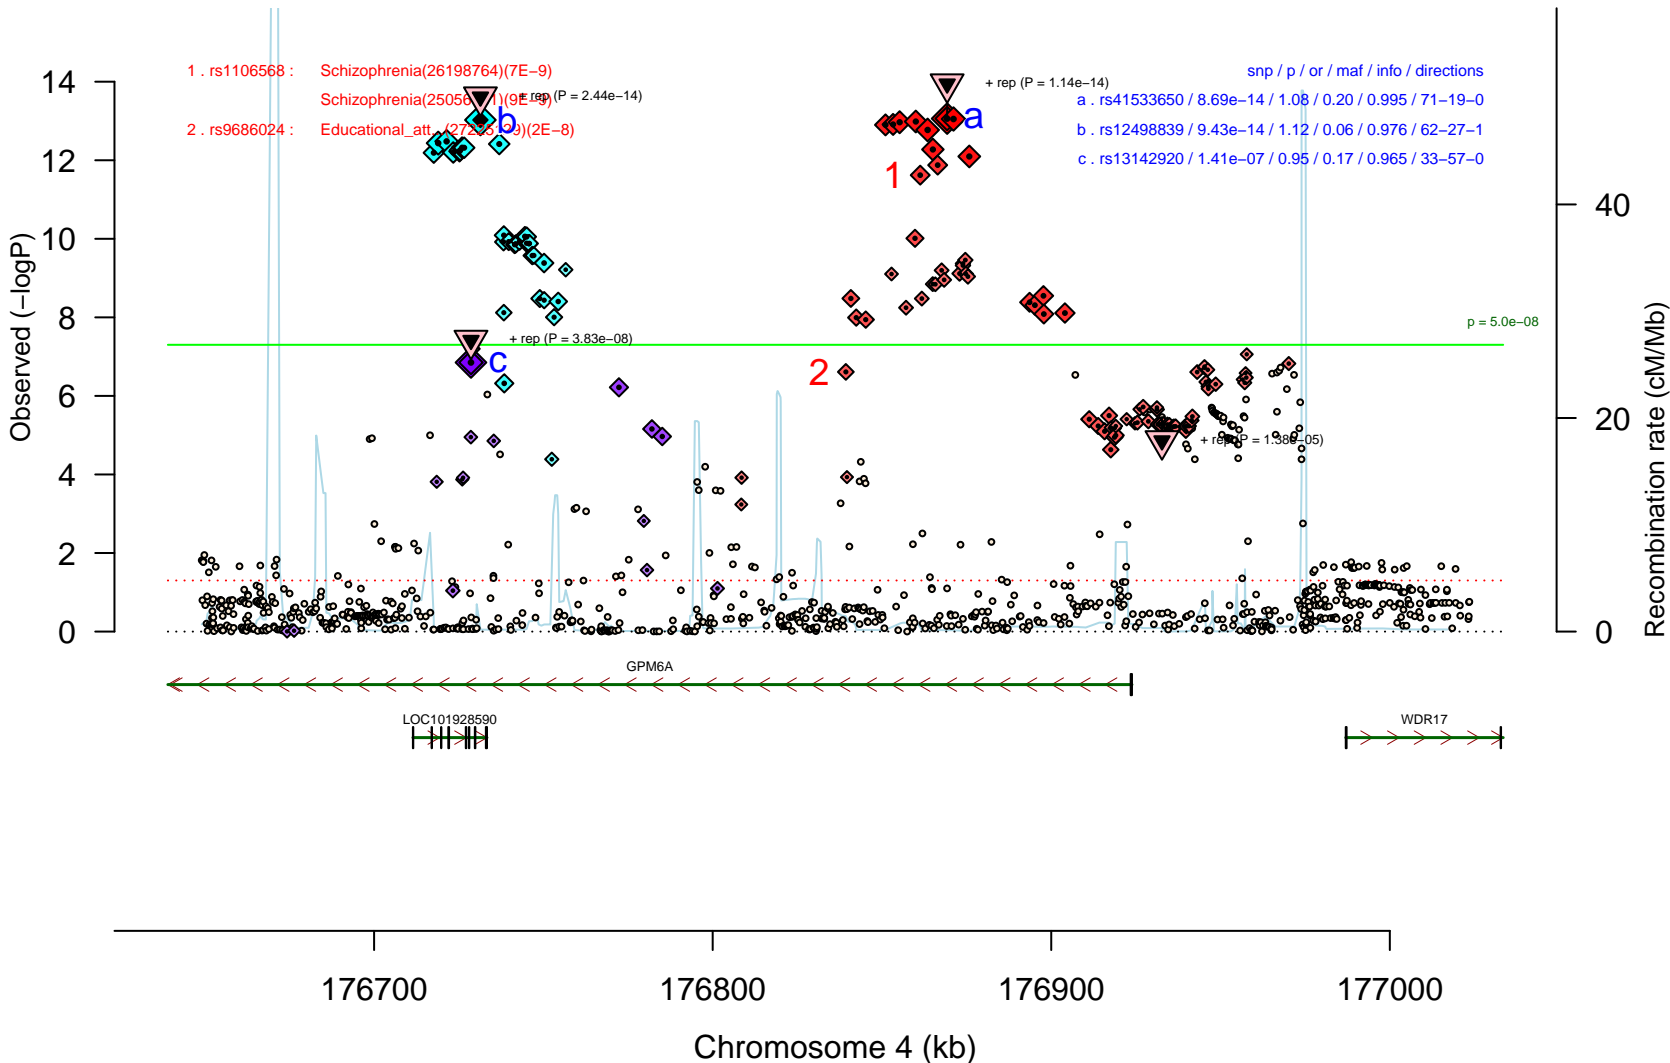

# PGC\_SCZ\_w3\_90\_0418b.224.chr15

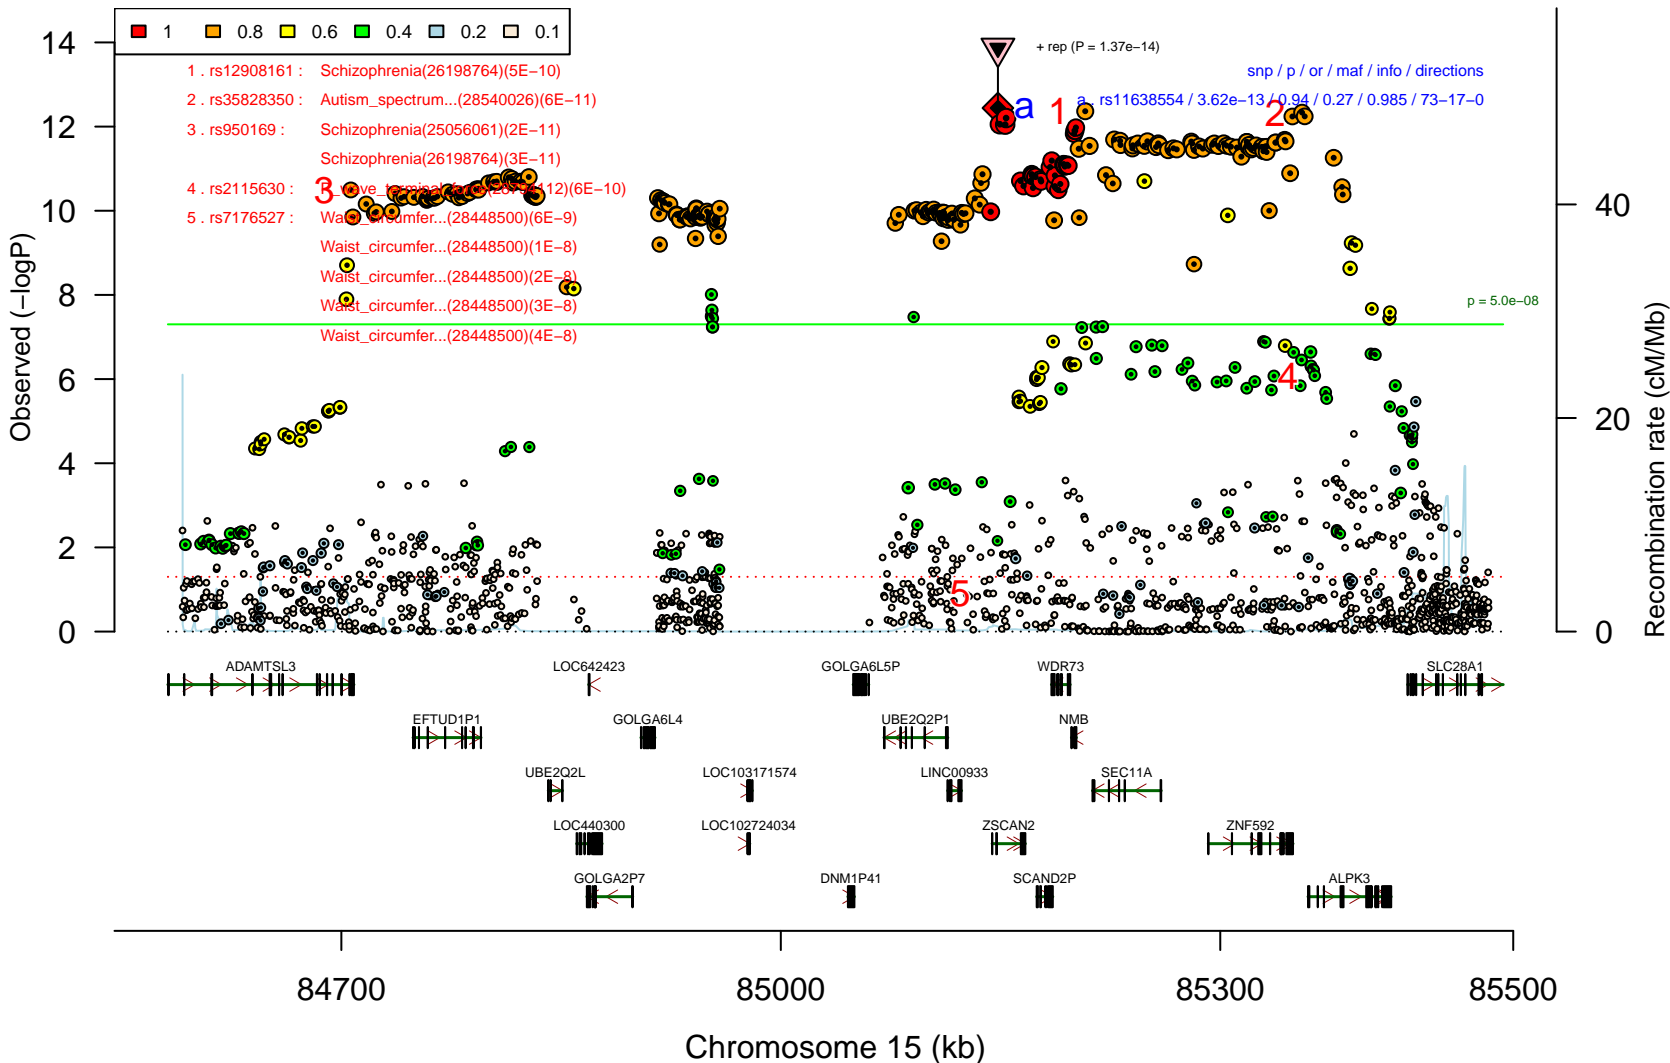

# PGC\_SCZ\_w3\_90\_0418b.46.chr2

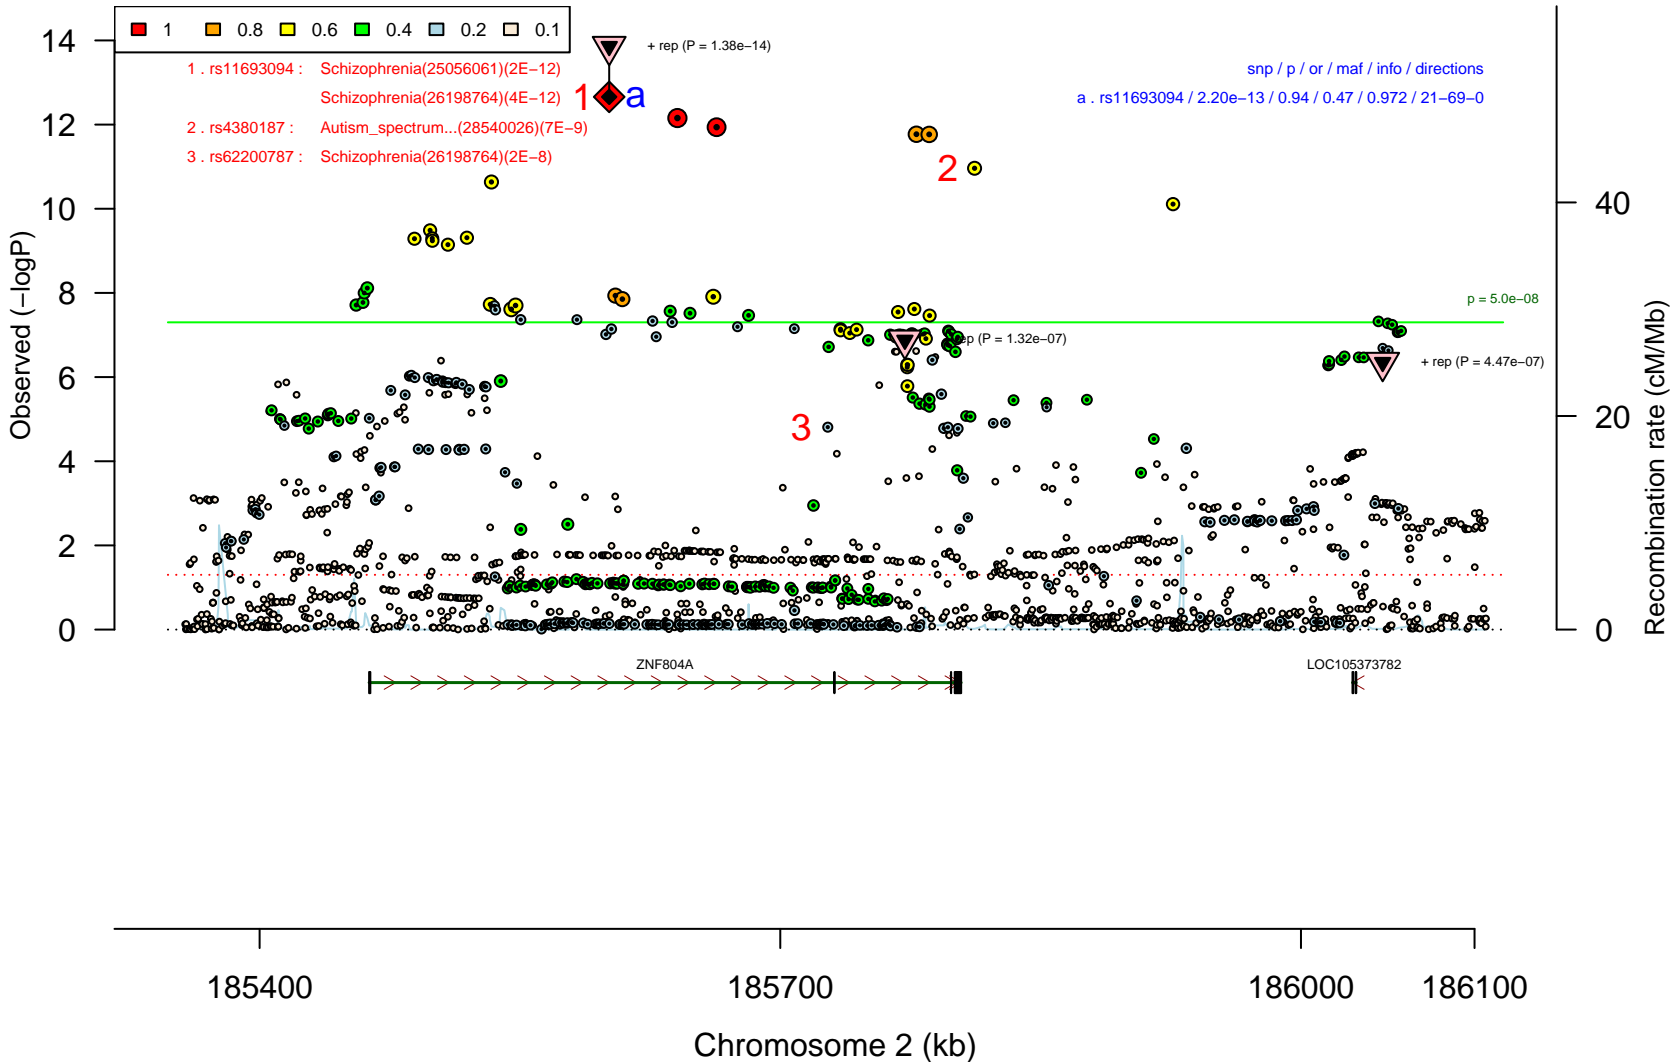

# PGC\_SCZ\_w3\_90\_0418b.126.chr7

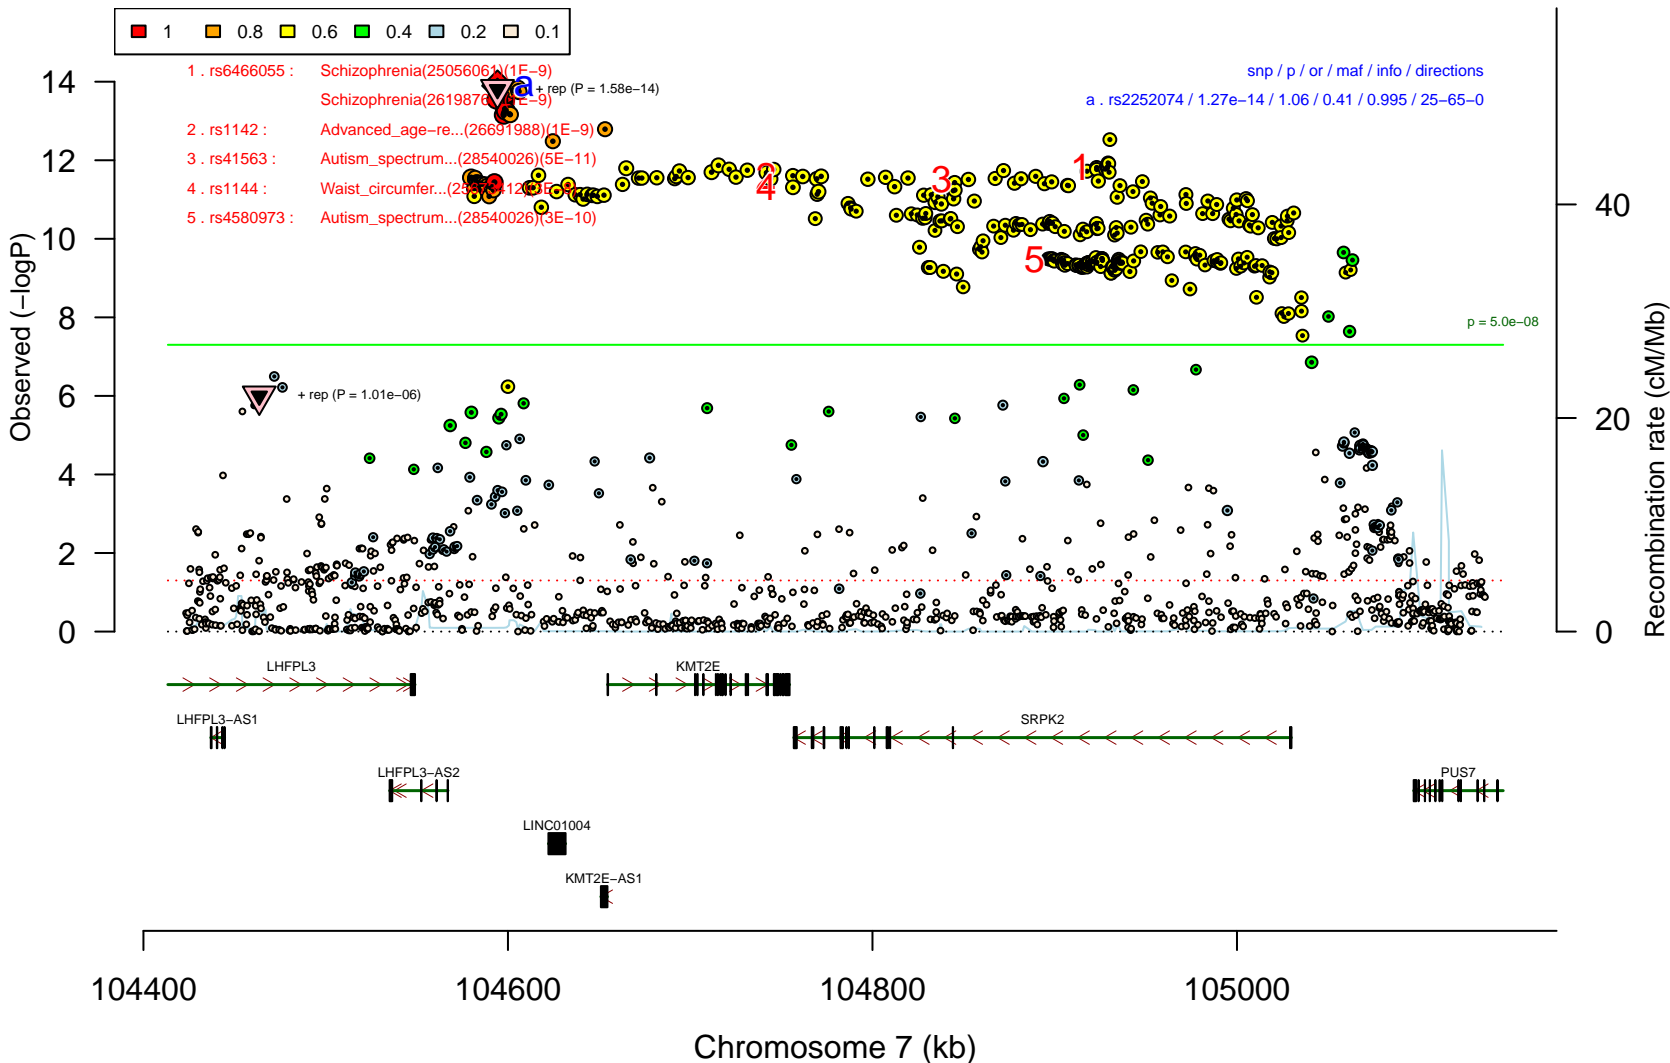

# PGC\_SCZ\_w3\_90\_0418b.25.chr1

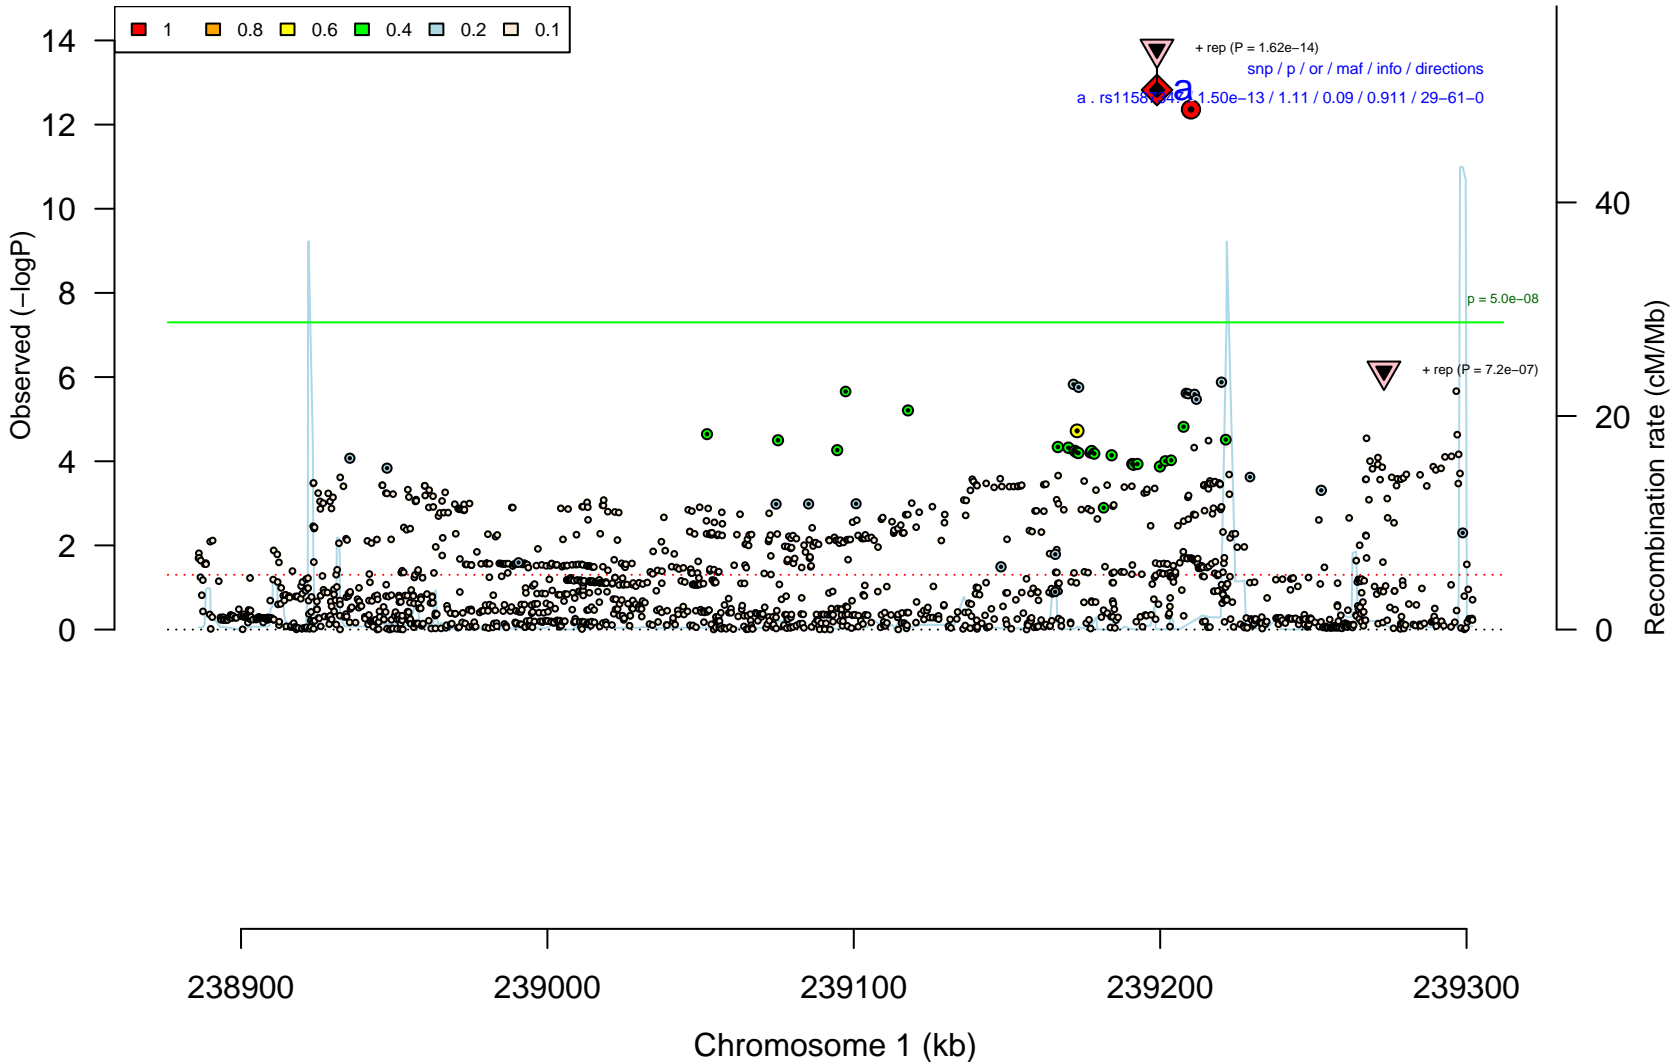



# PGC\_SCZ\_w3\_90\_0418b.216.chr14

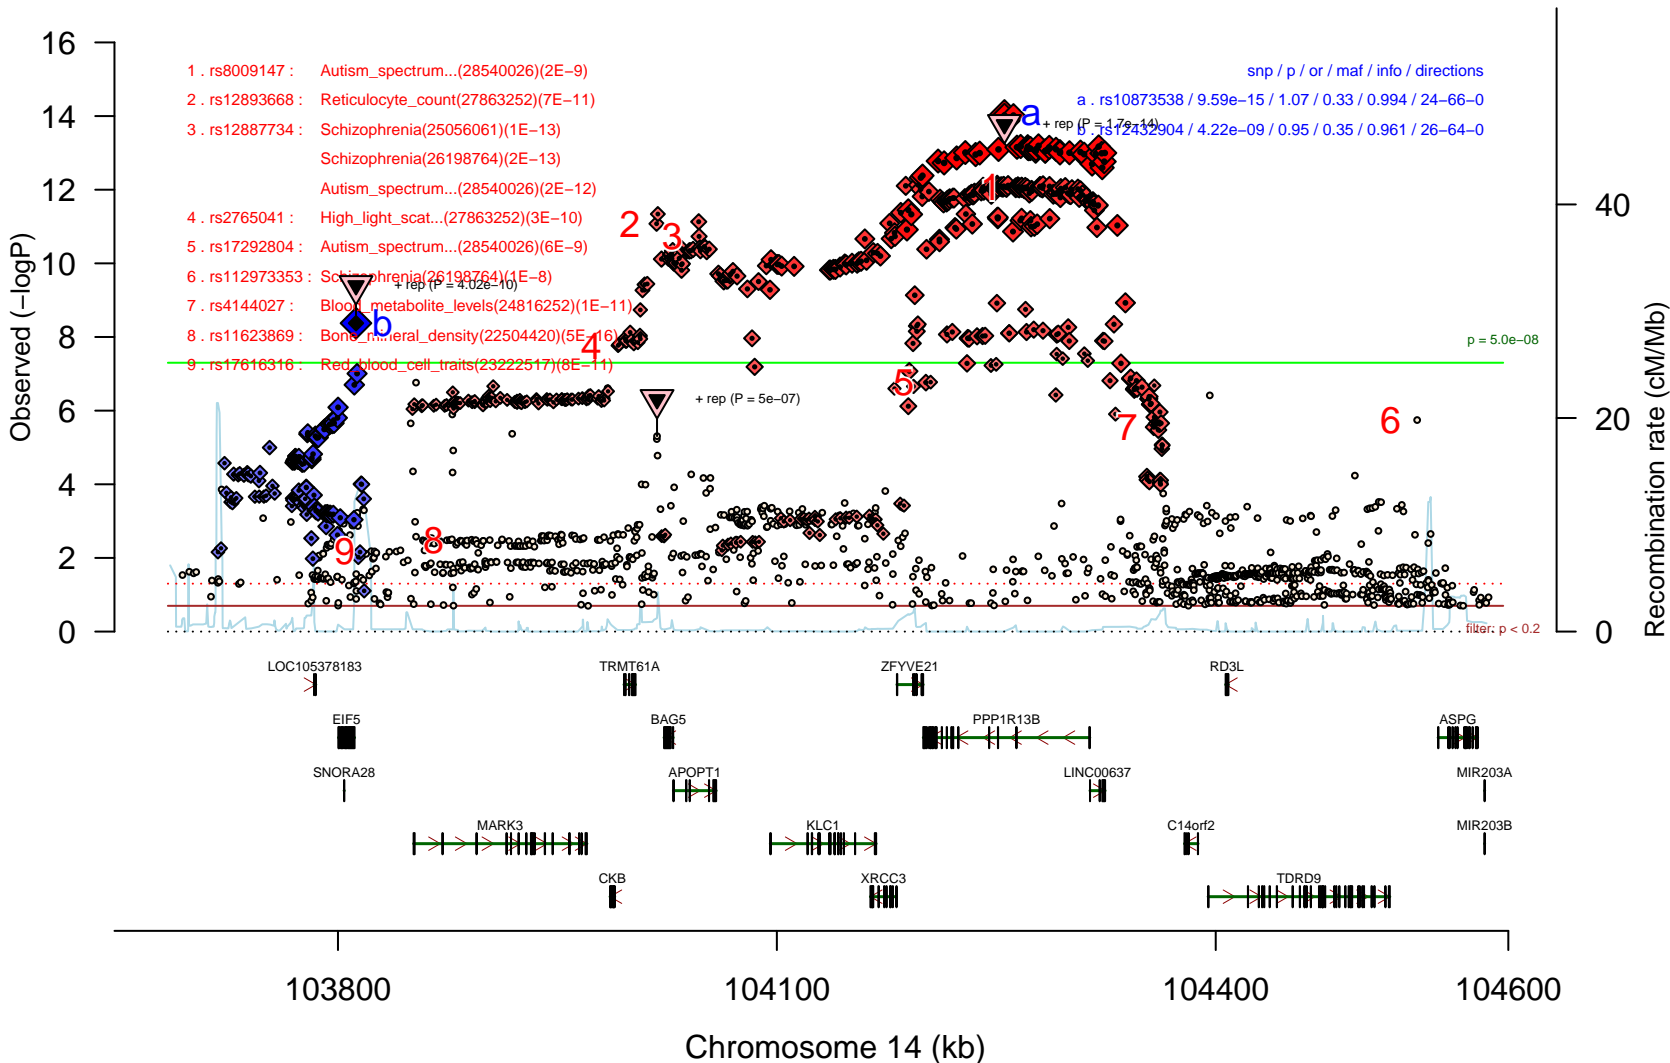

# PGC\_SCZ\_w3\_90\_0418b.63.chr3

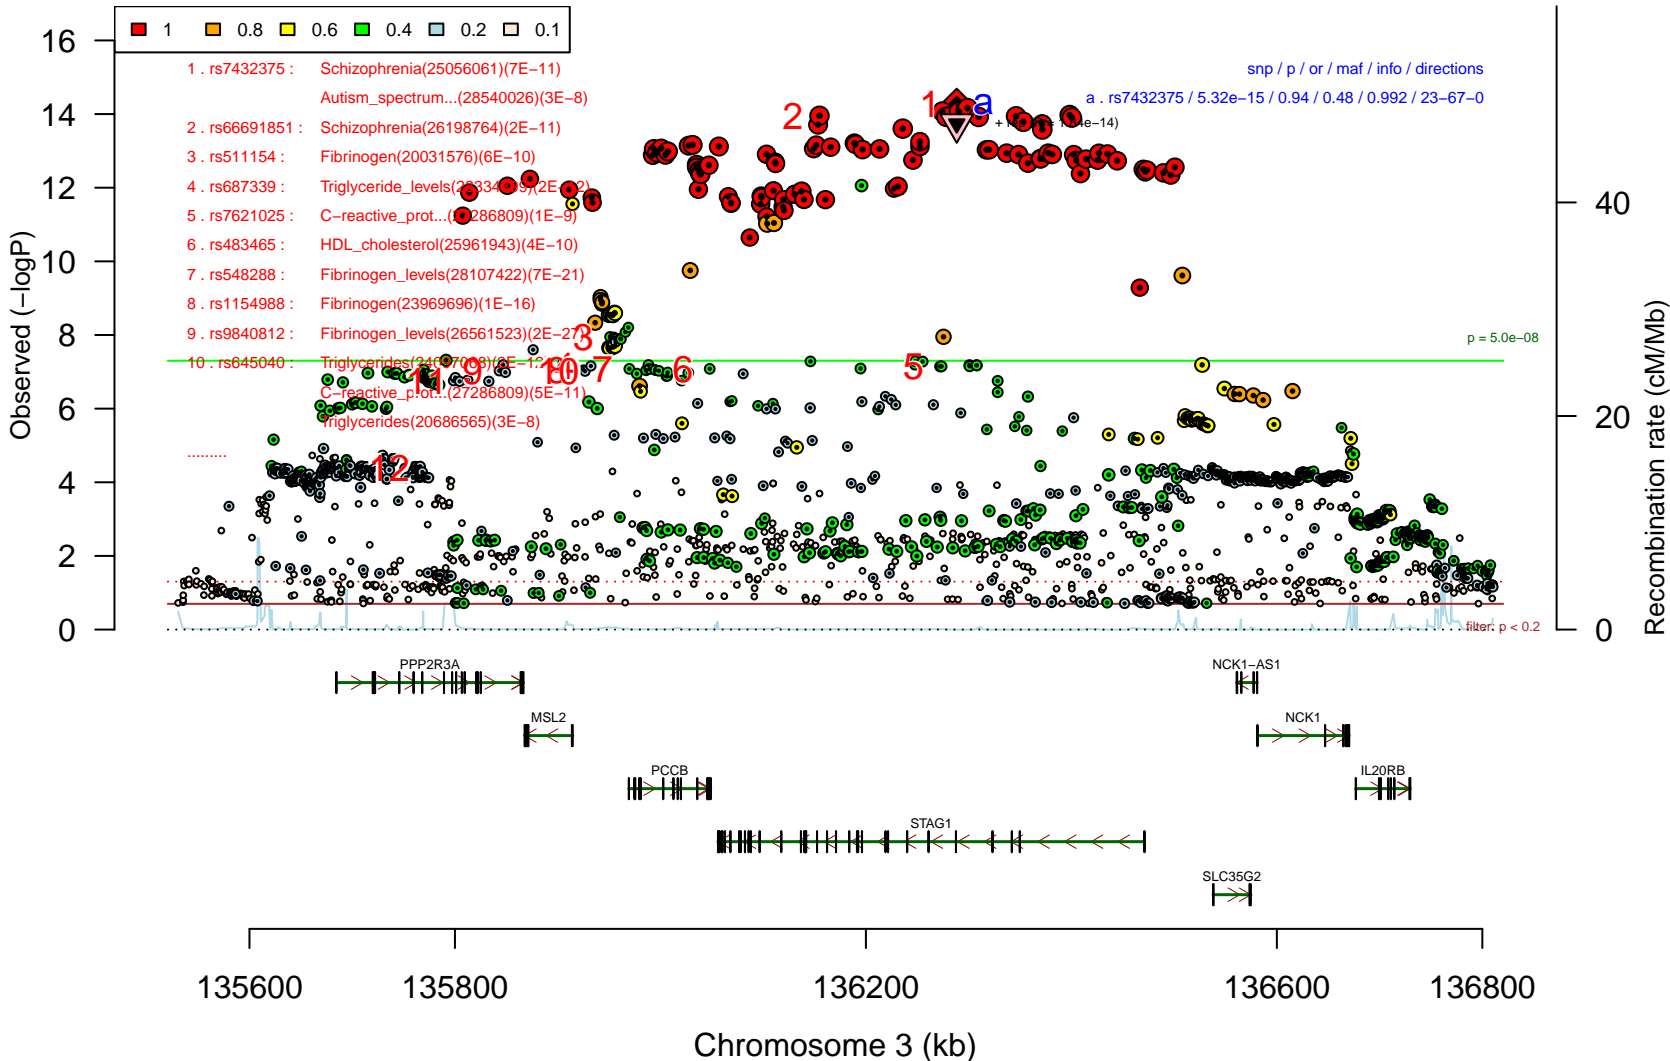

# PGC\_SCZ\_w3\_90\_0418b.48.chr2

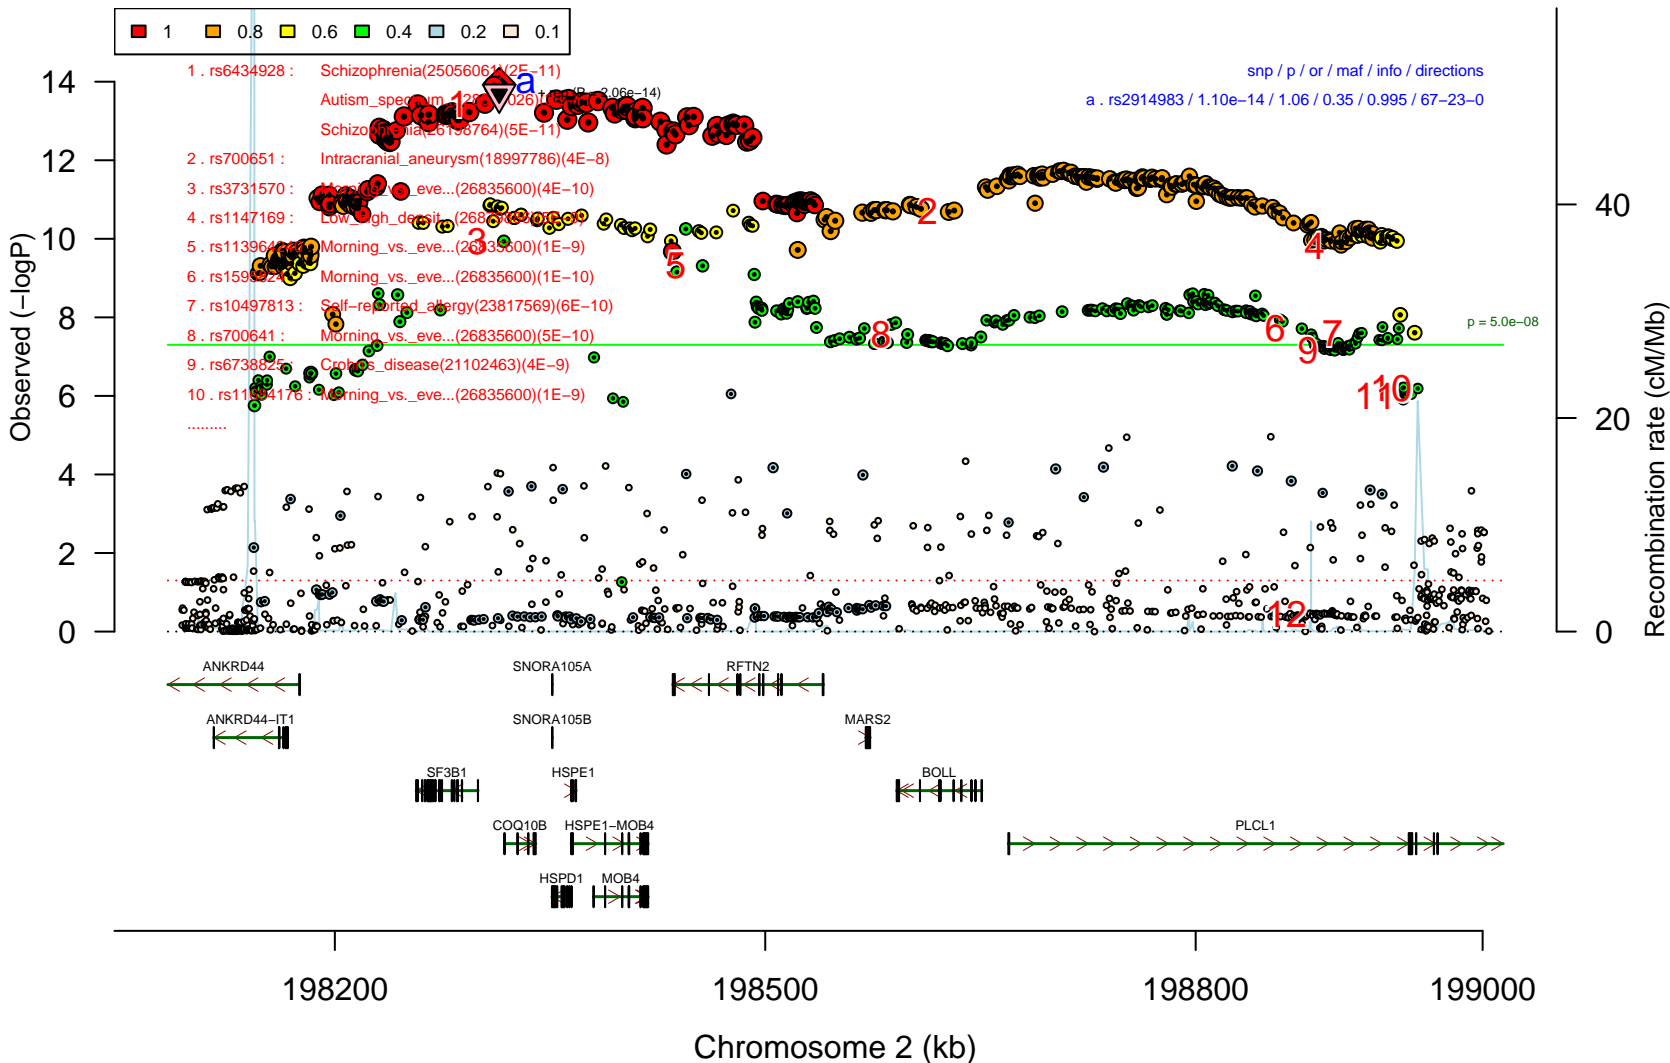

PGC SCZ w3 90 0418b.263.chr22

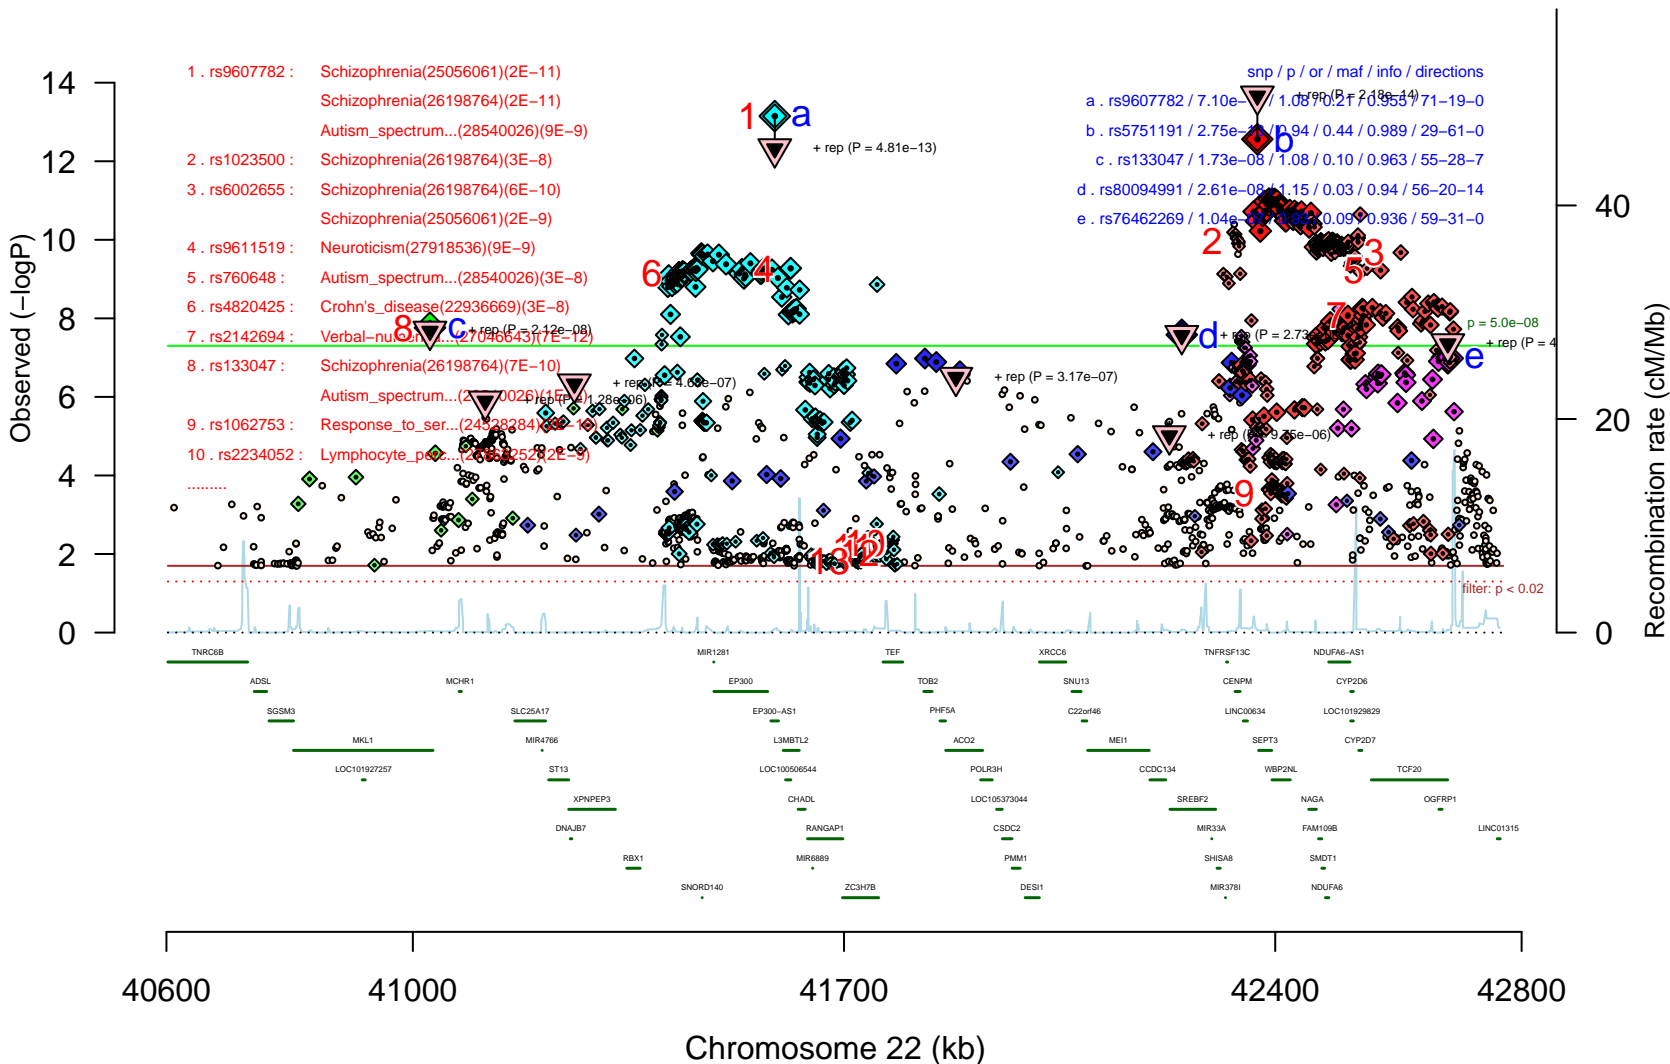

# PGC\_SCZ\_w3\_90\_0418b.128.chr7

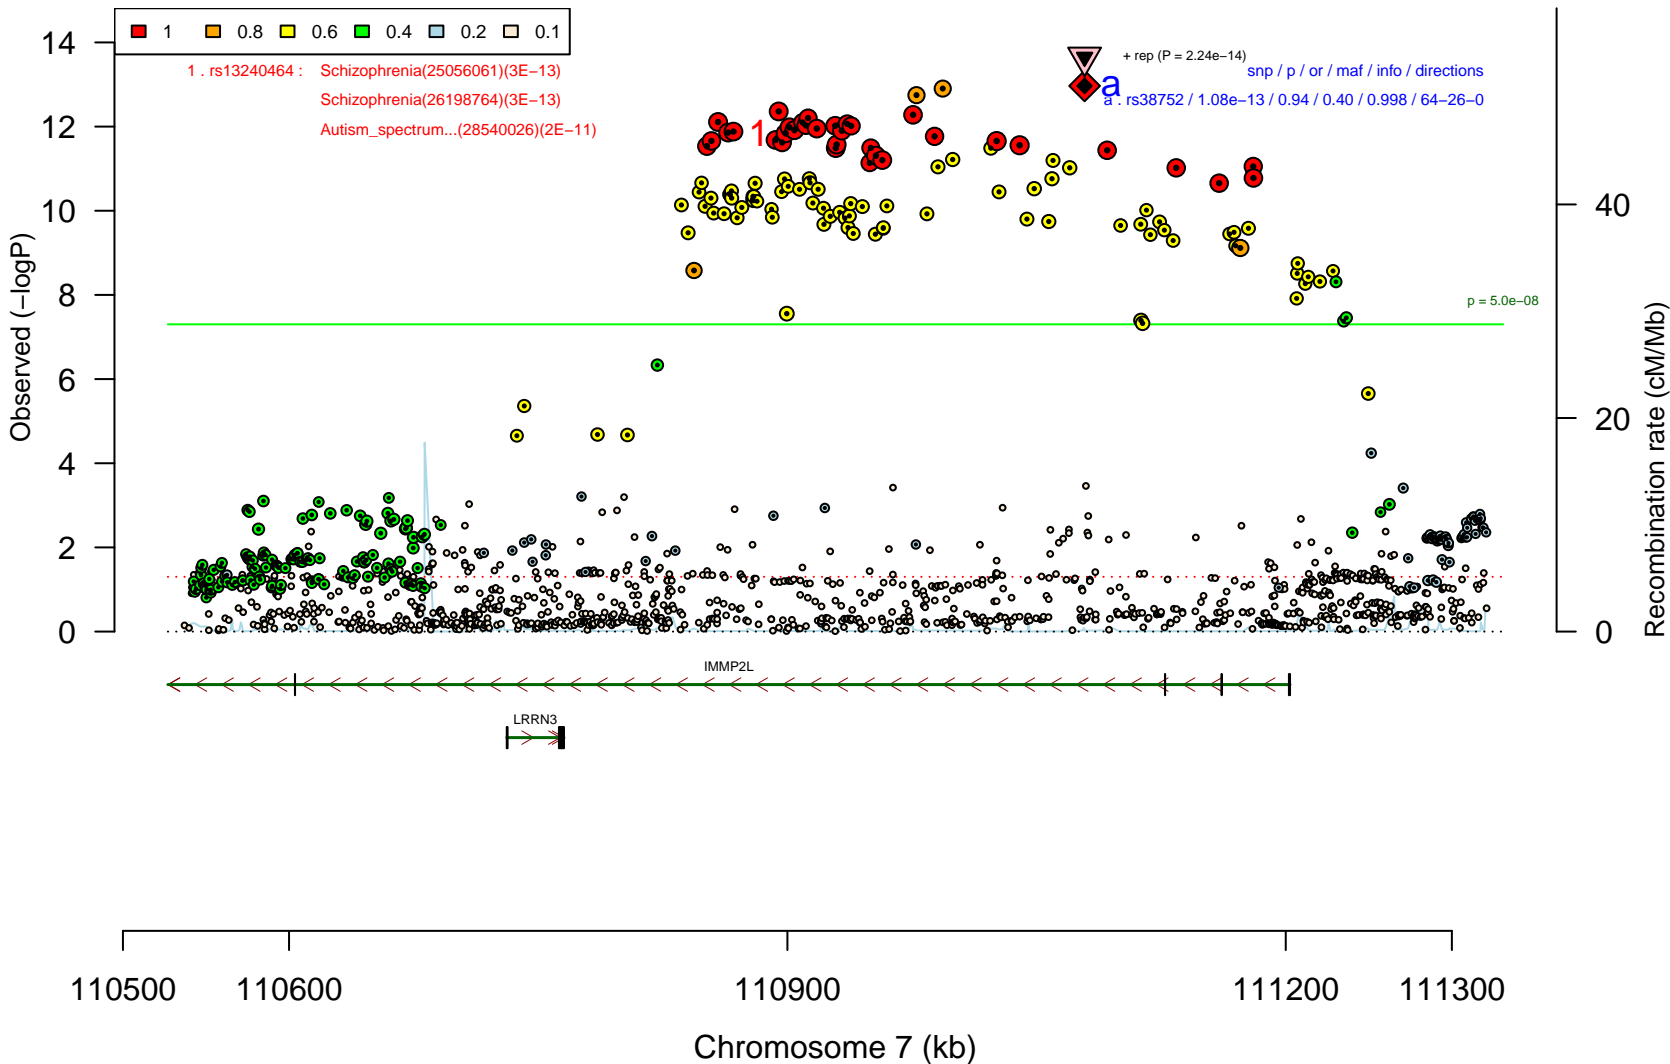

# PGC\_SCZ\_w3\_90\_0418b.246.chr18

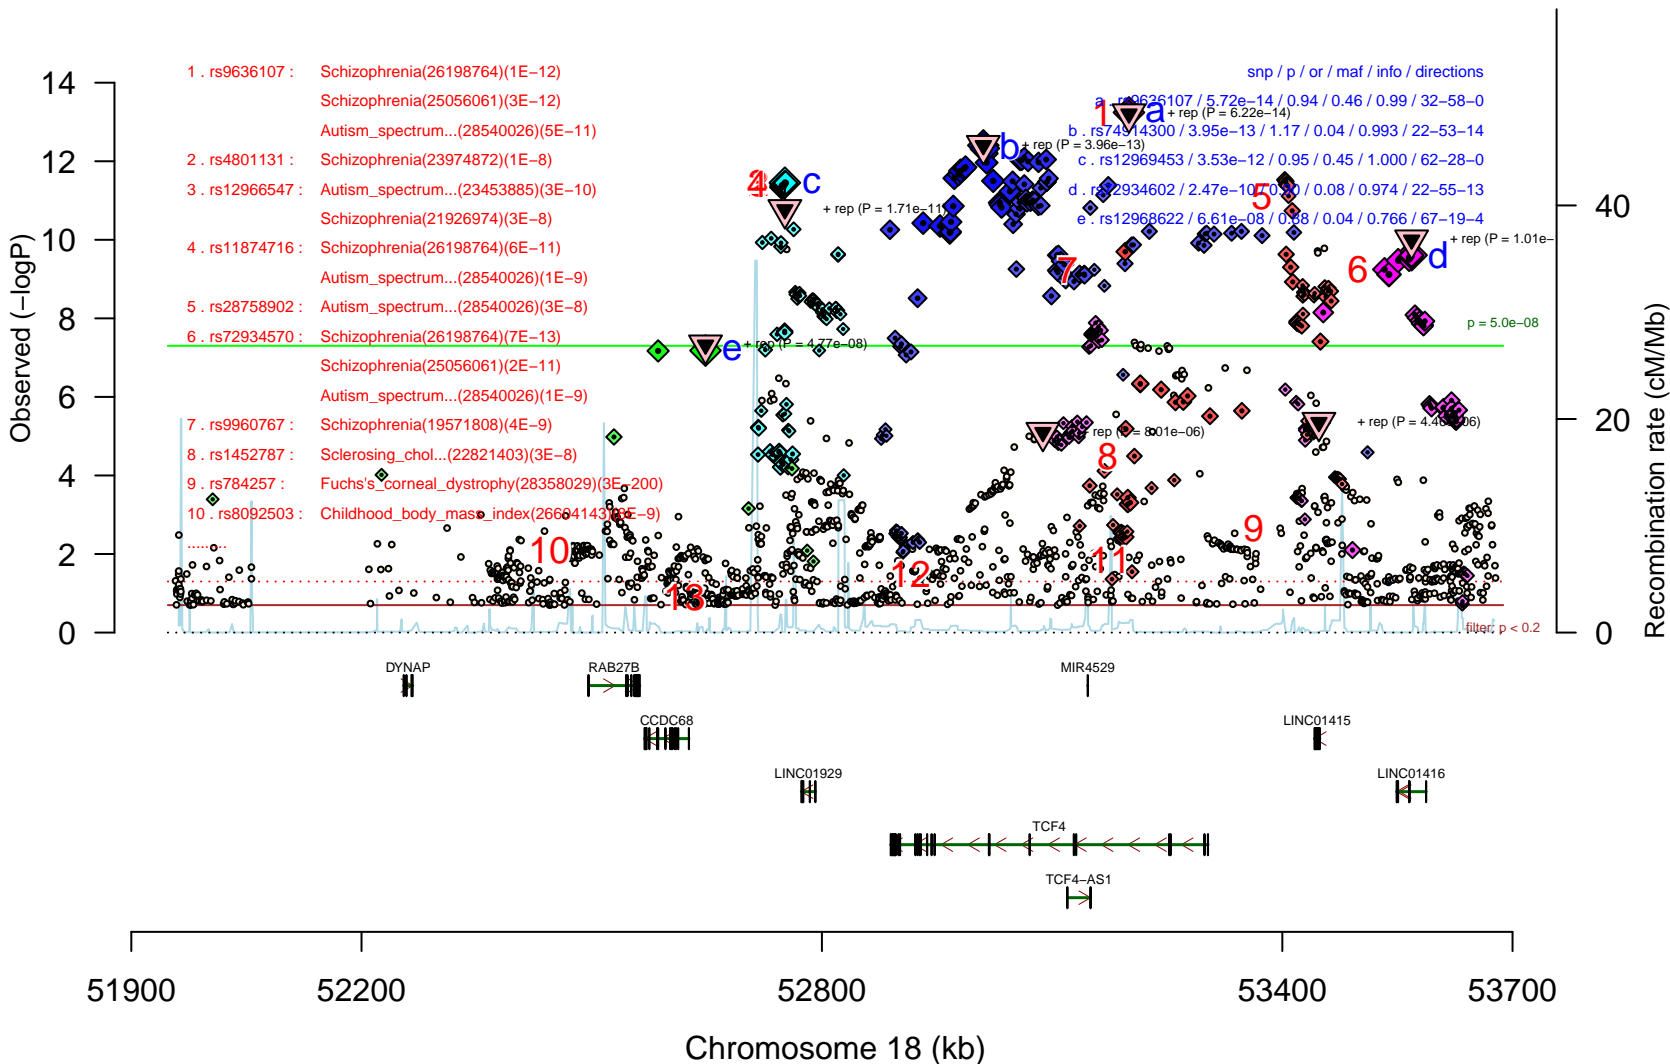

# PGC\_SCZ\_w3\_90\_0418b.247.chr18

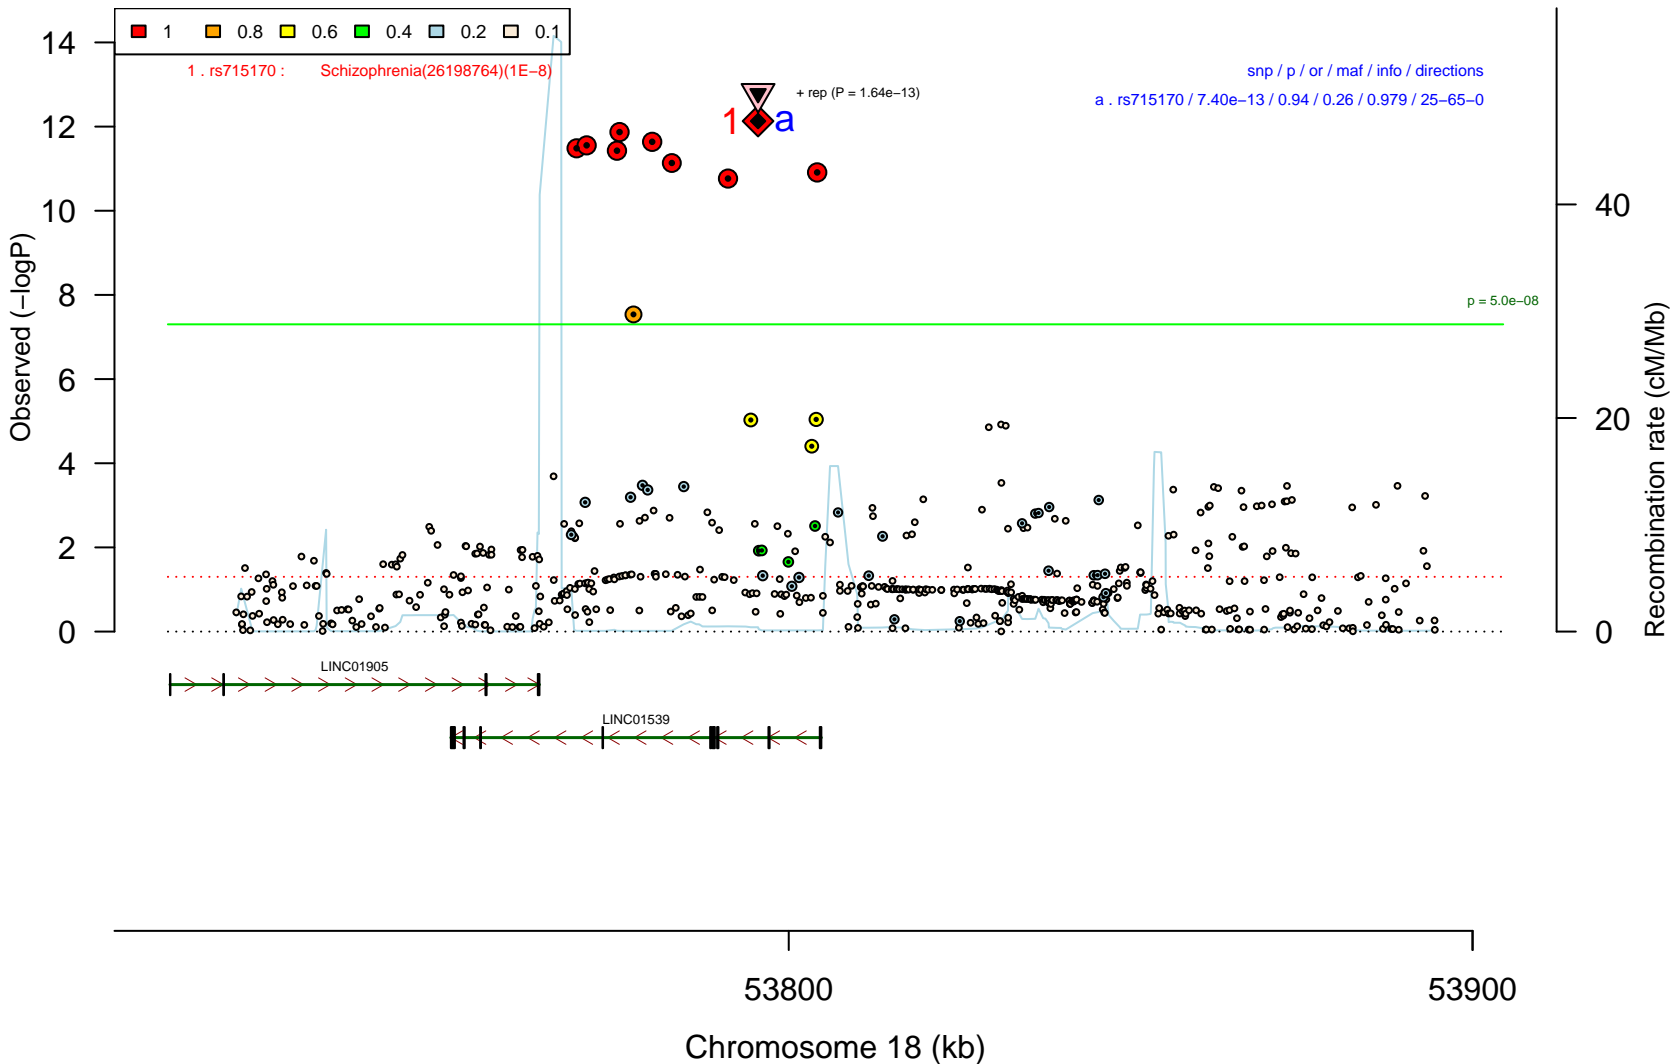

# PGC\_SCZ\_w3\_90\_0418b.178.chr11

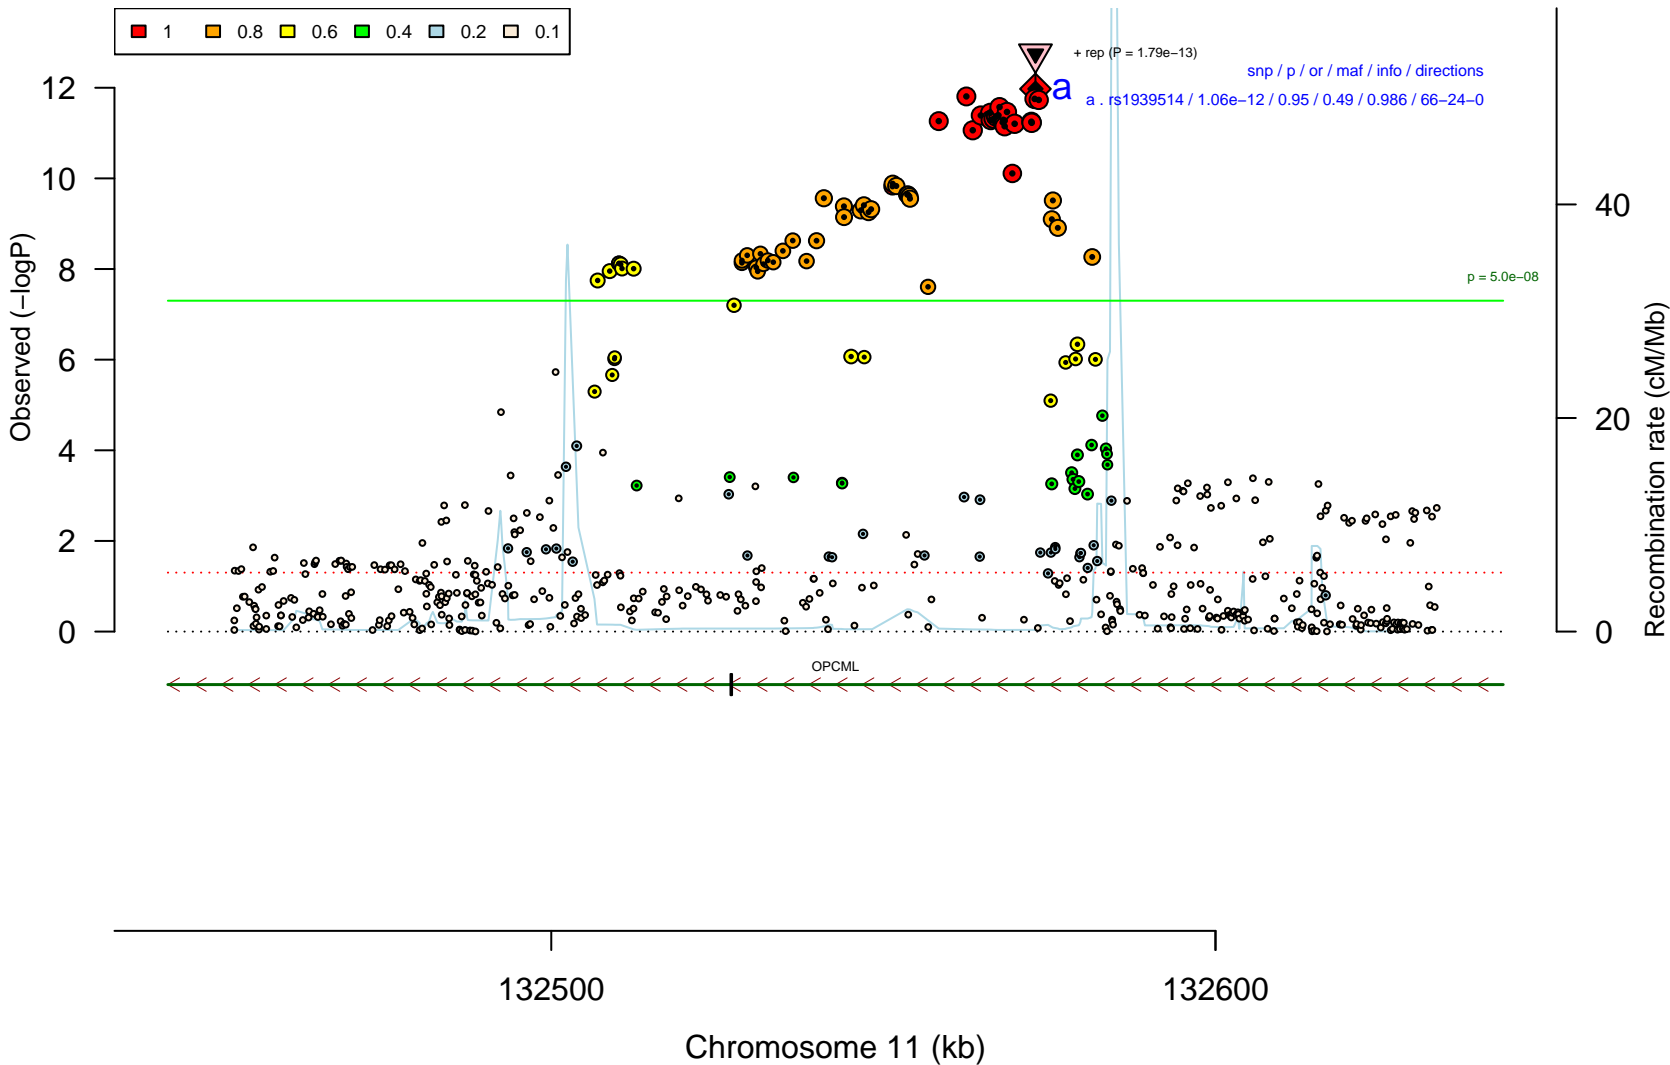



# PGC\_SCZ\_w3\_90\_0418b.96.chr5

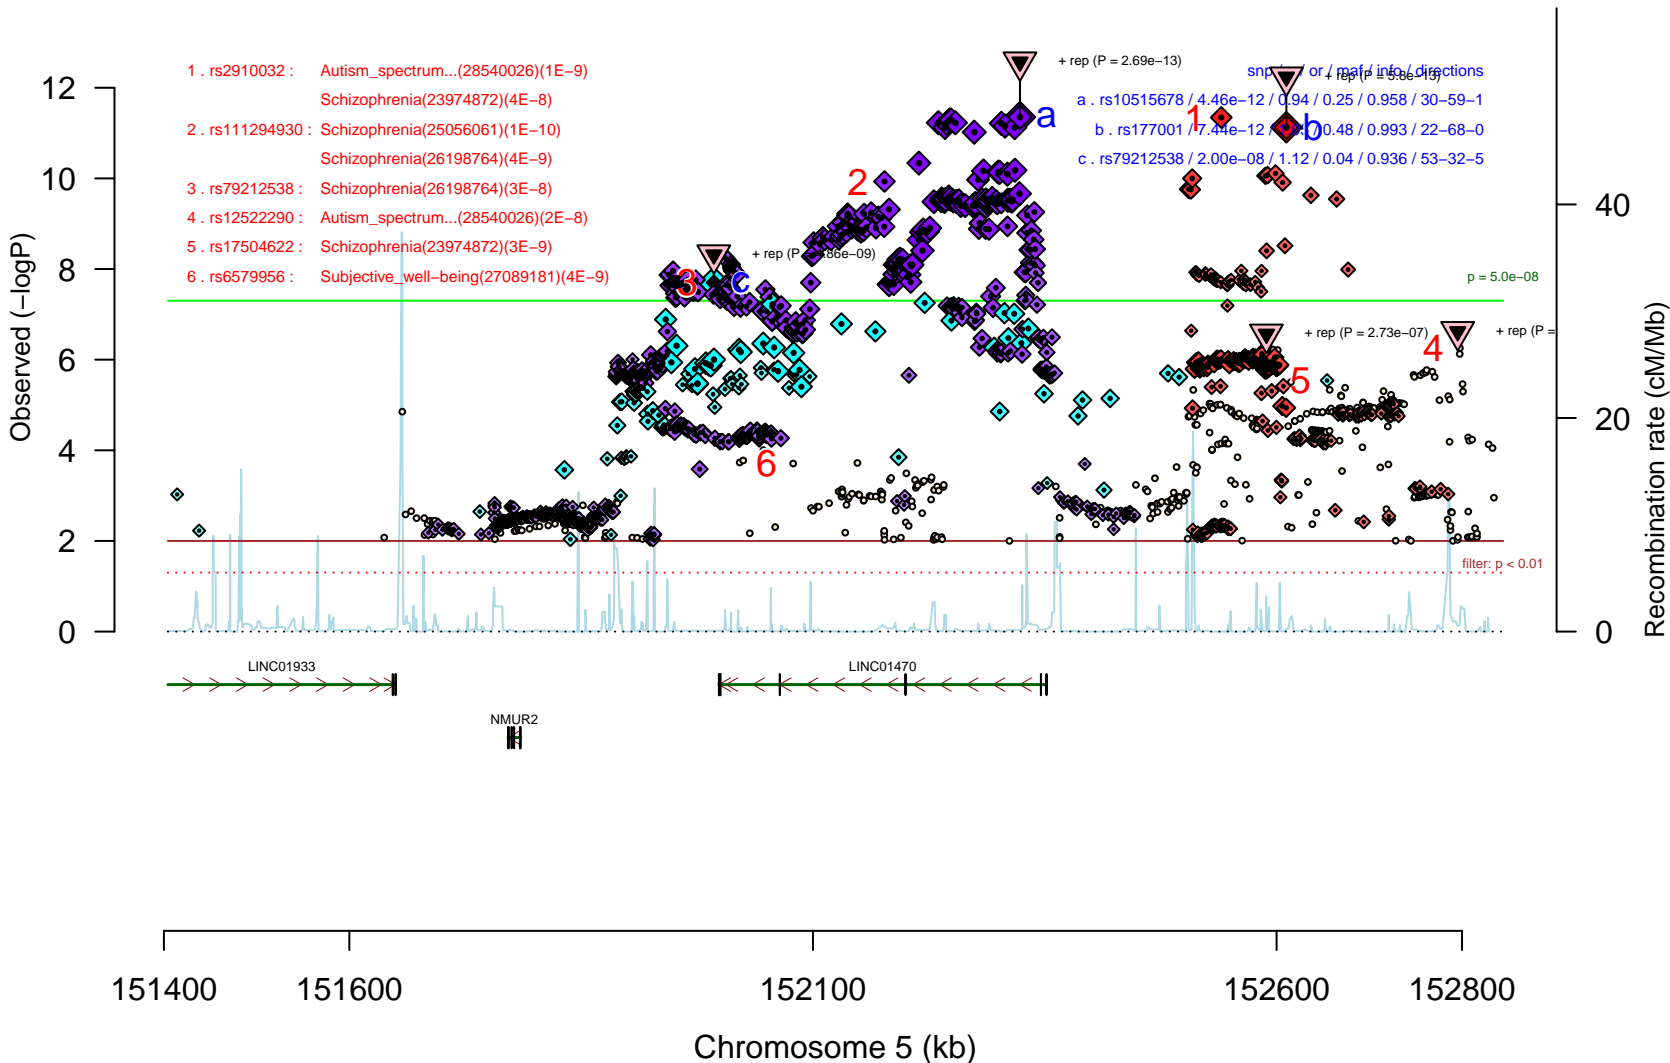

# PGC\_SCZ\_w3\_90\_0418b.221.chr15

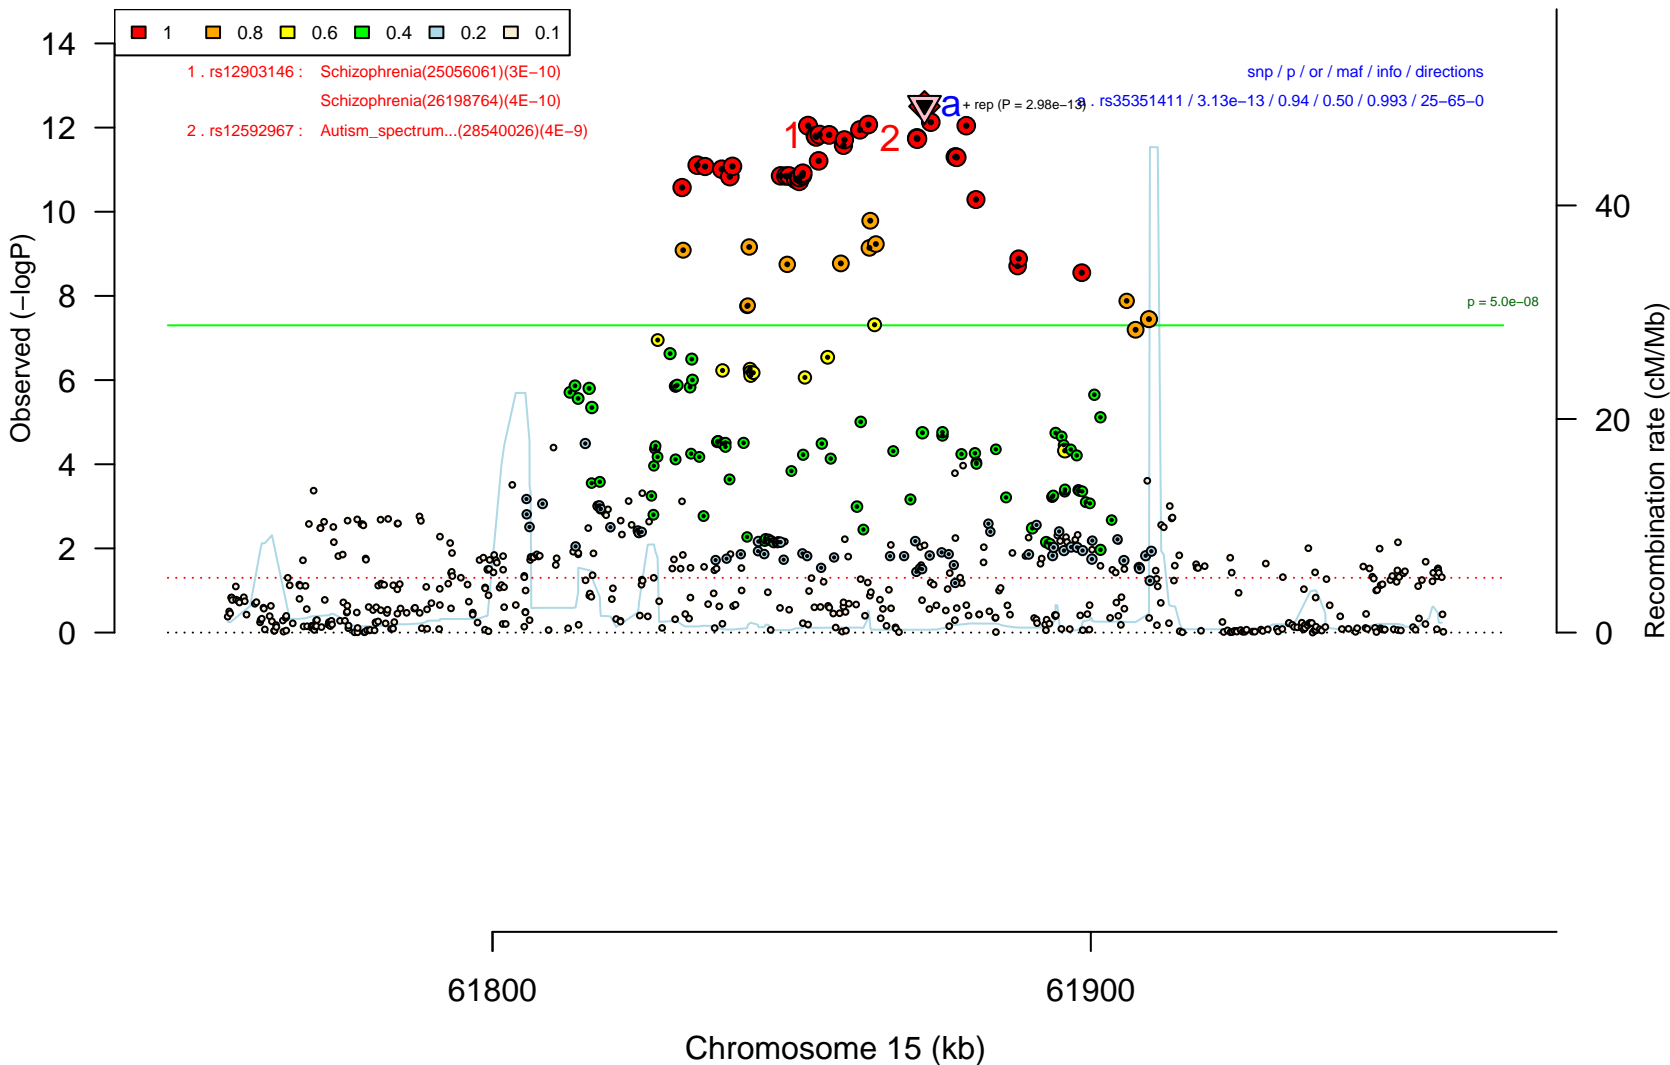

# PGC\_SCZ\_w3\_90\_0418b.138.chr8

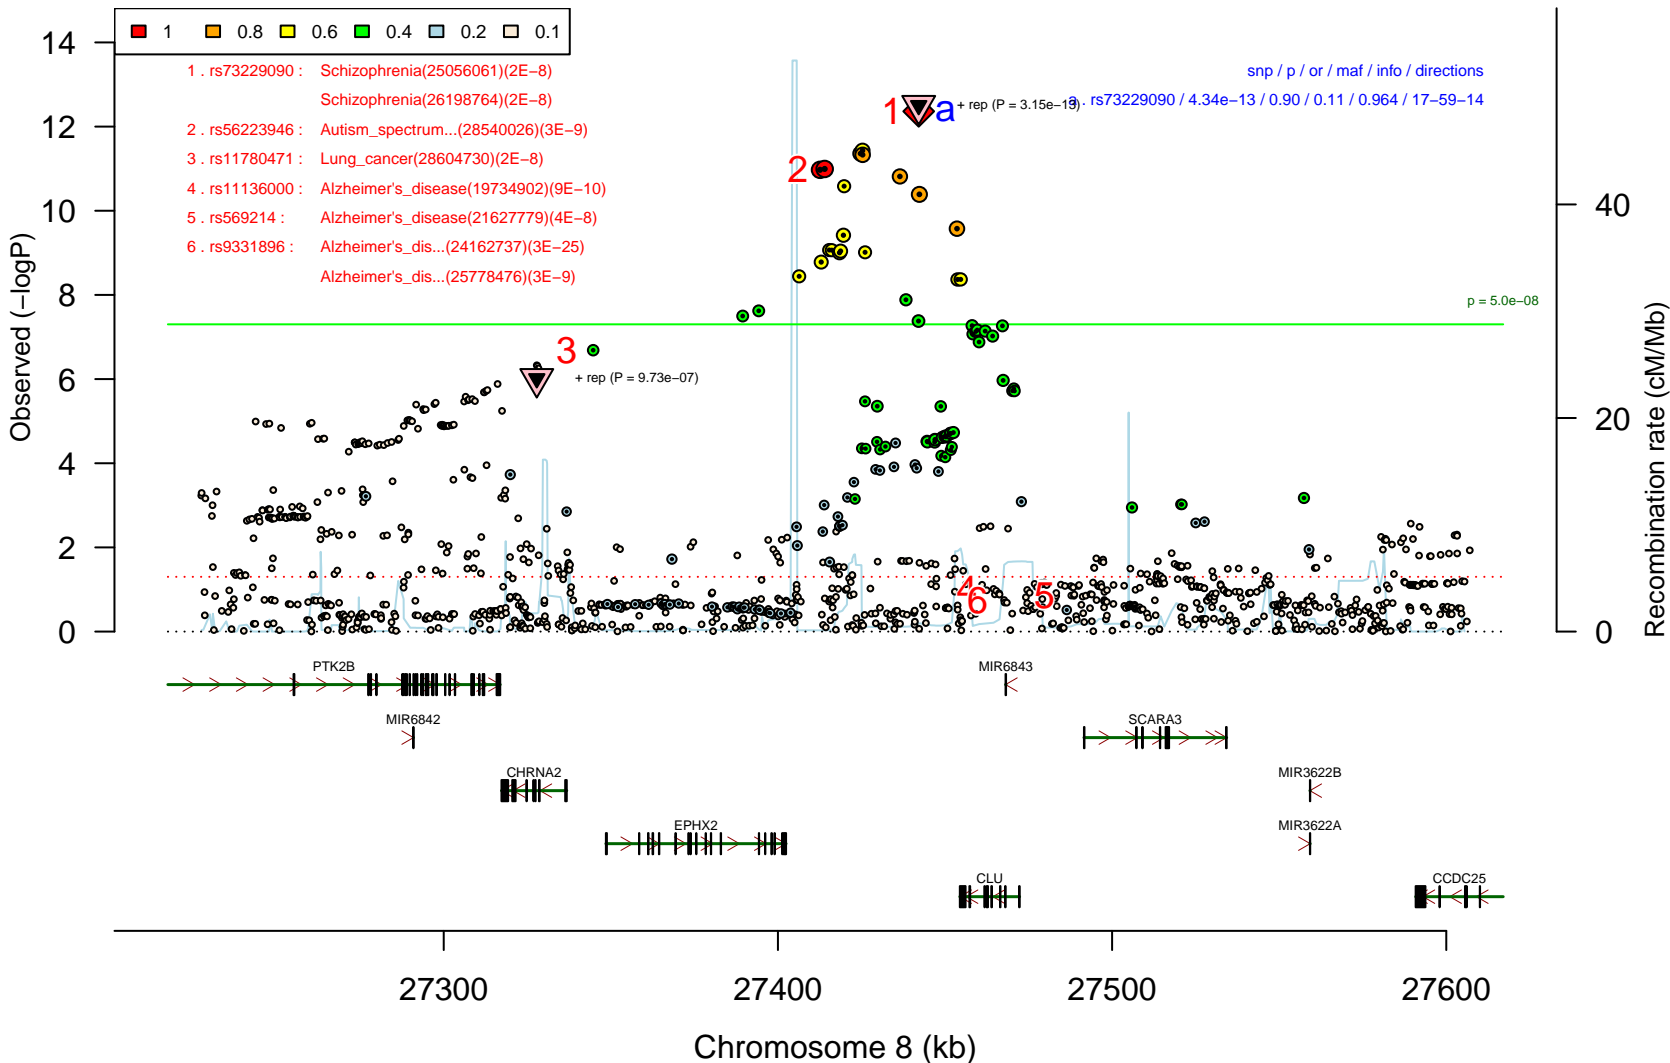

# PGC\_SCZ\_w3\_90\_0418b.262.chr22

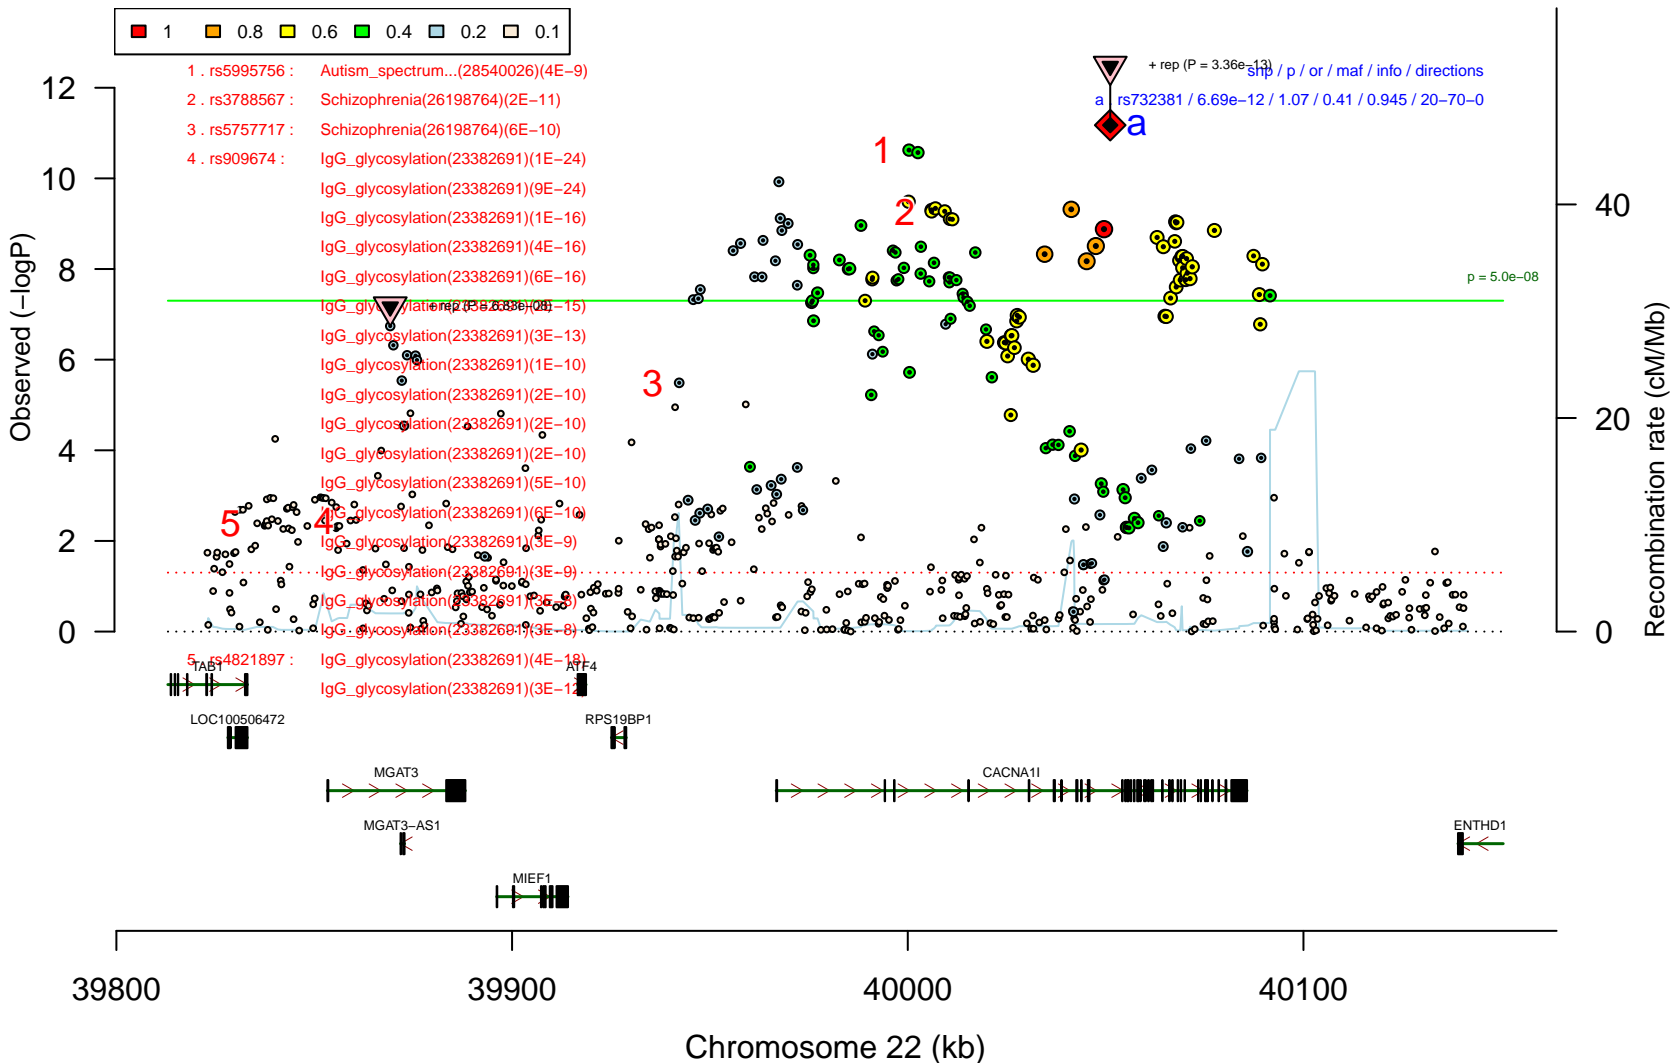

# PGC\_SCZ\_w3\_90\_0418b.159.chr10

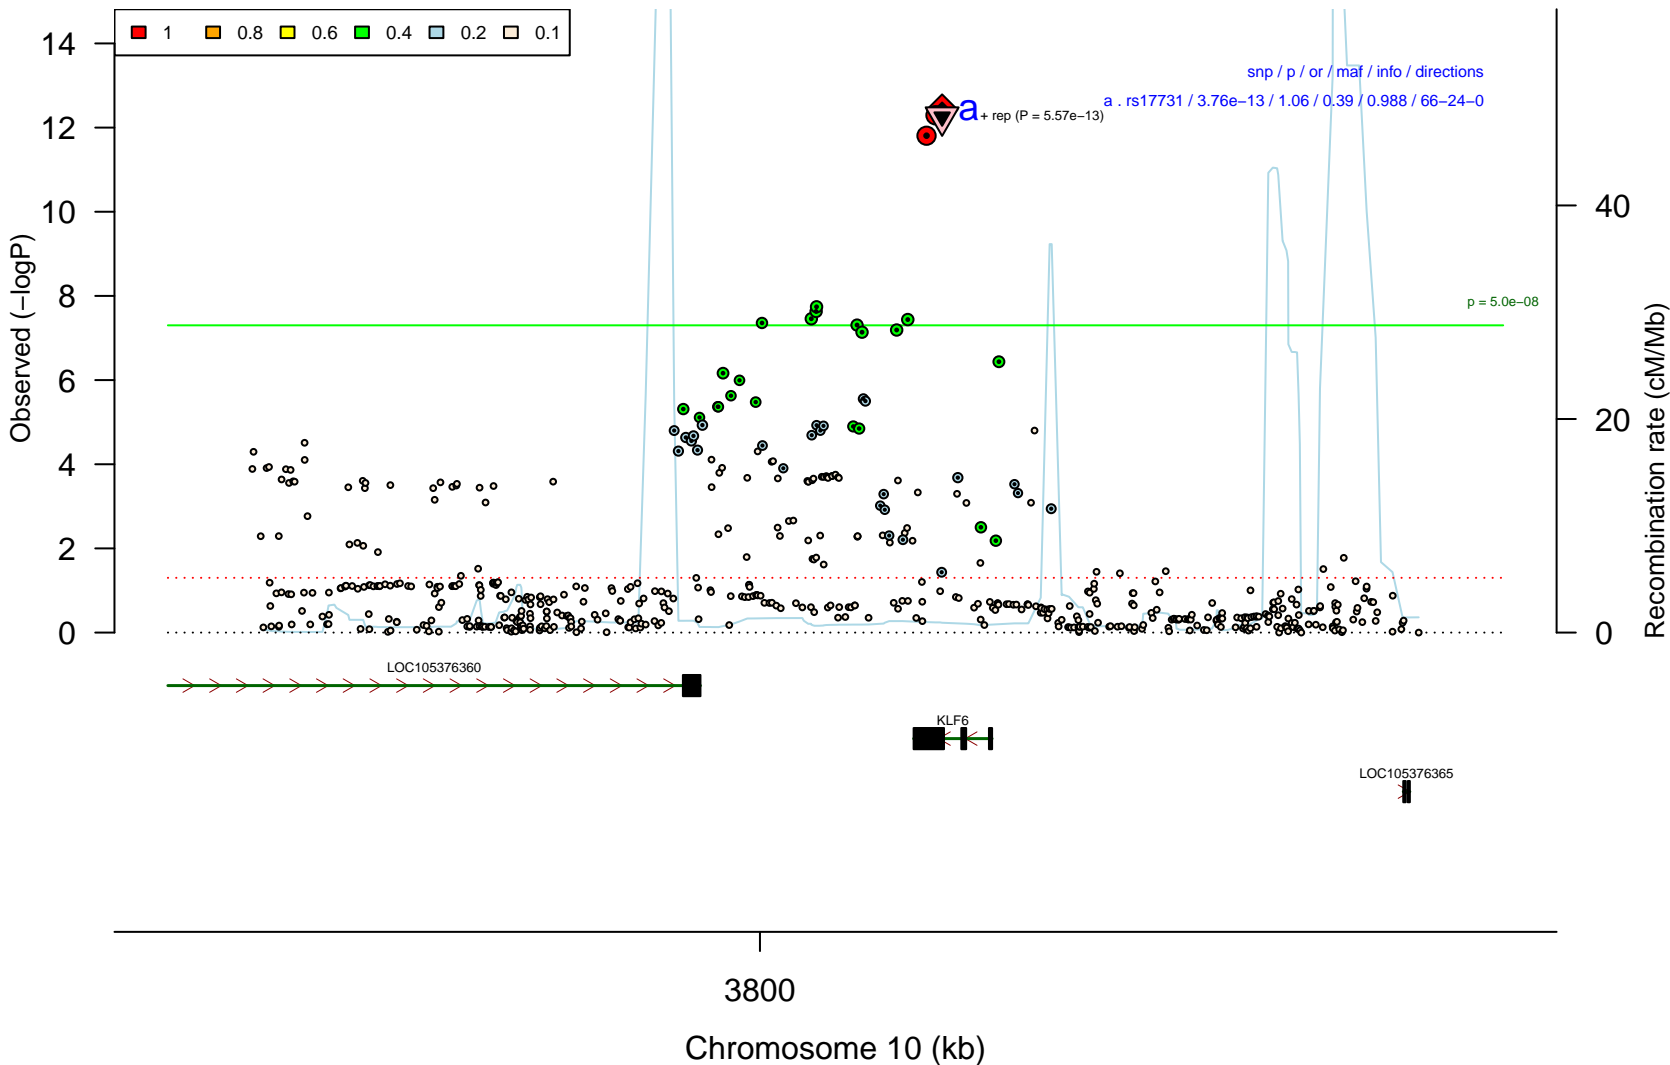

# PGC\_SCZ\_w3\_90\_0418b.211.chr14

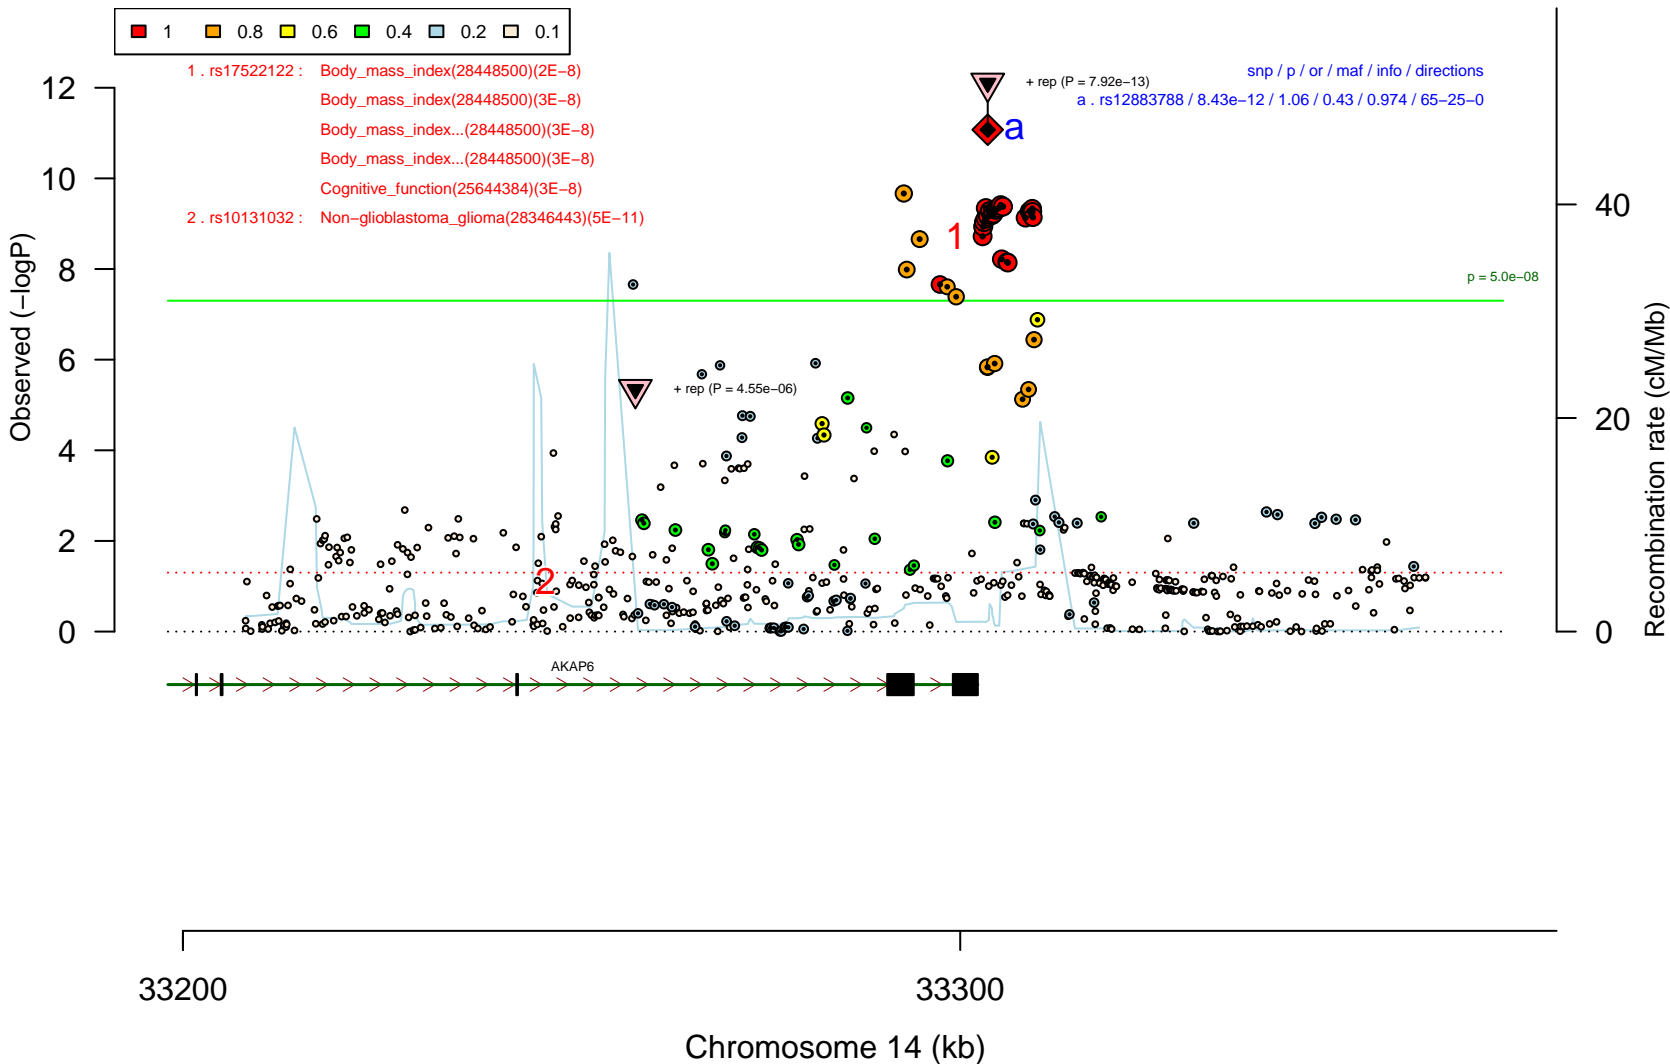

# PGC\_SCZ\_w3\_90\_0418b.208.chr13

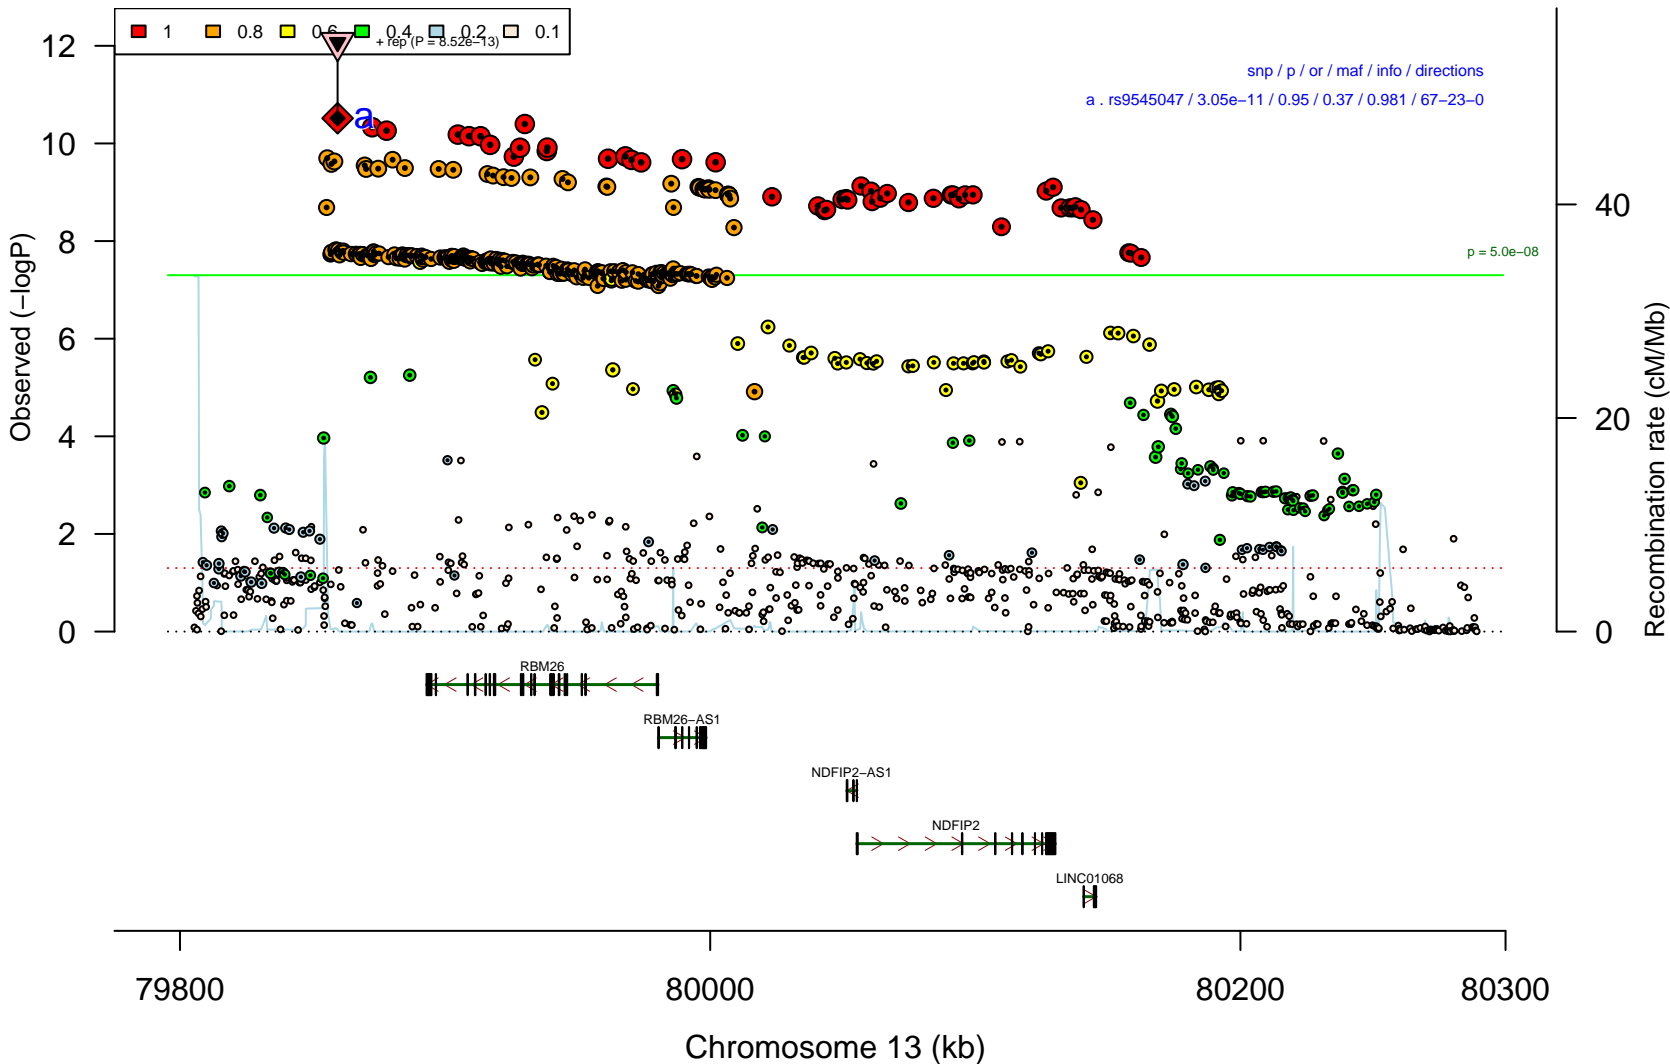

# PGC\_SCZ\_w3\_90\_0418b.52.chr3

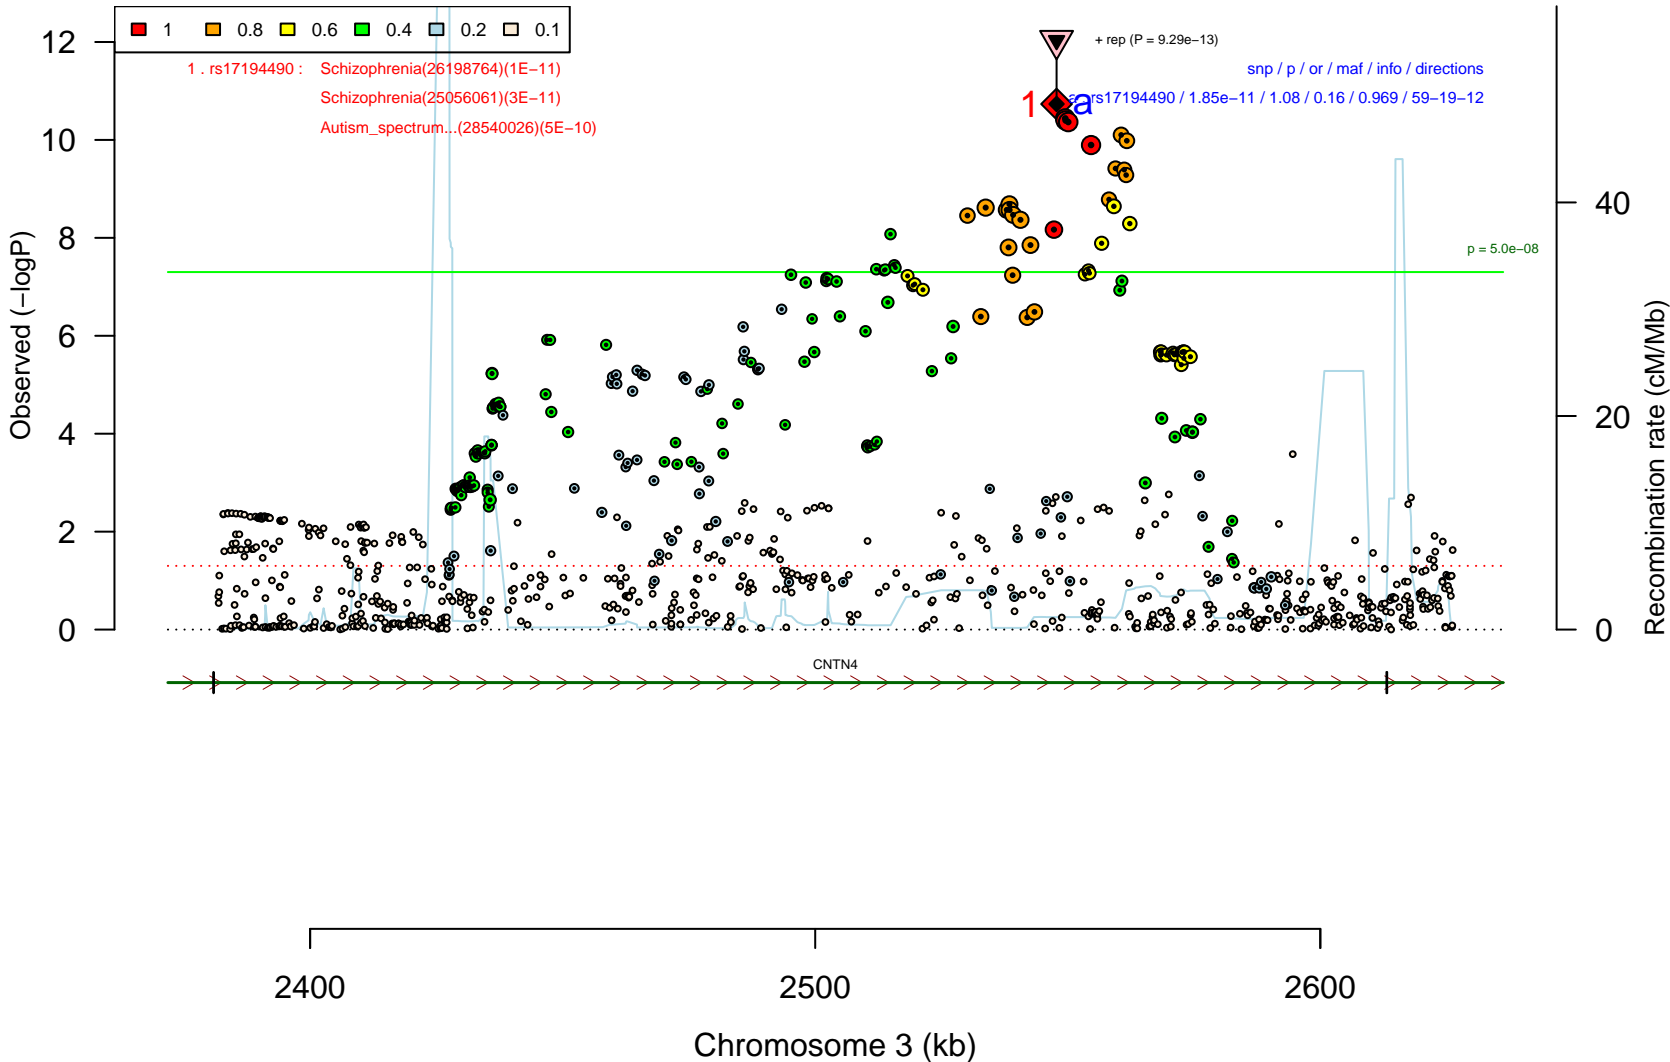



# PGC\_SCZ\_w3\_90\_0418b.1.chr1

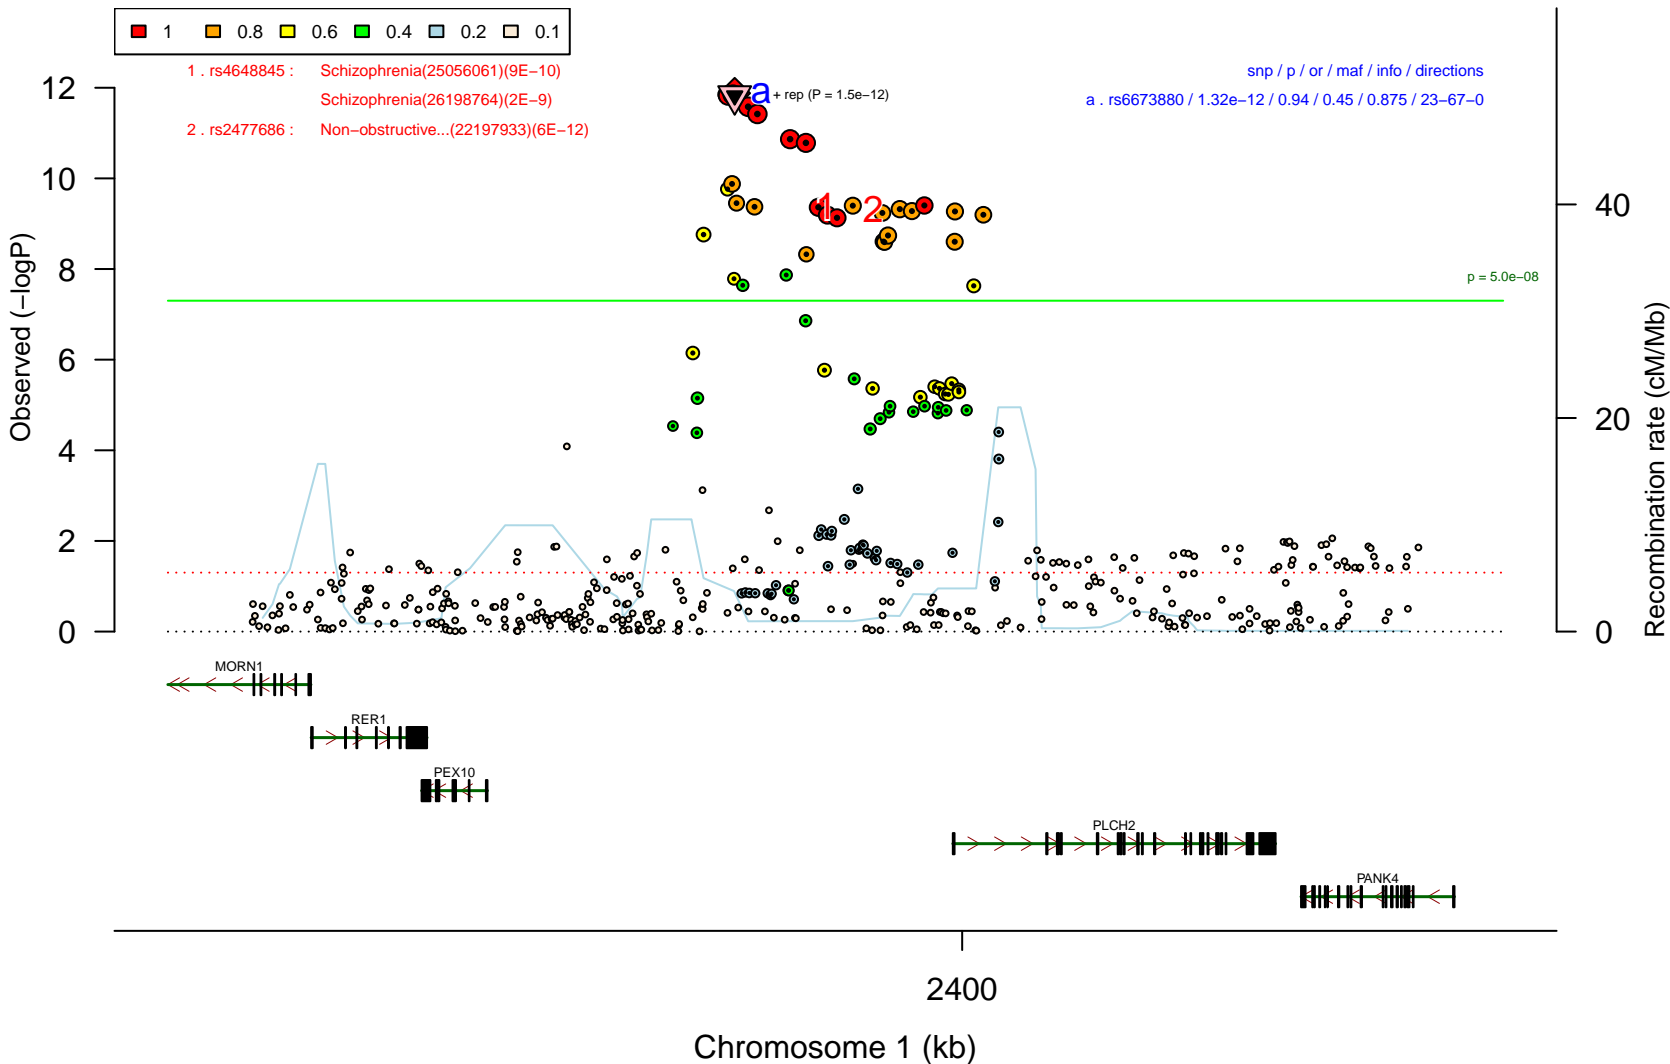

# PGC\_SCZ\_w3\_90\_0418b.230.chr16

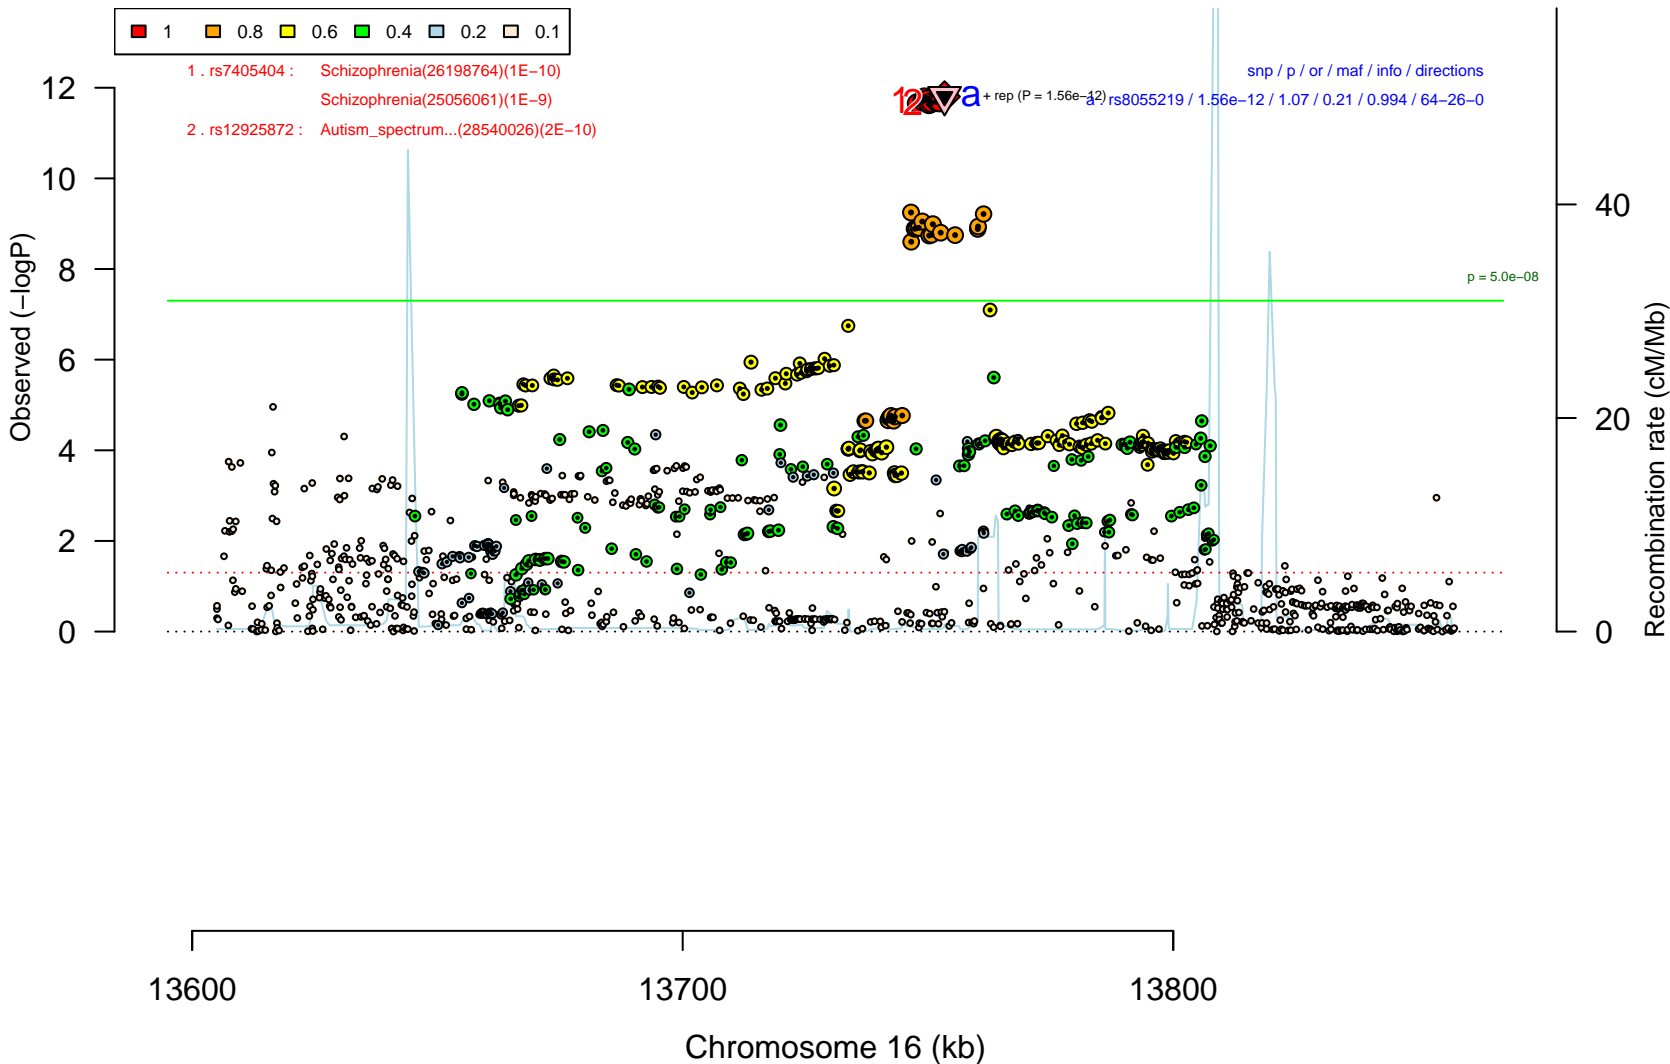

PGC SCZ w3 90 0418b.219.chr15

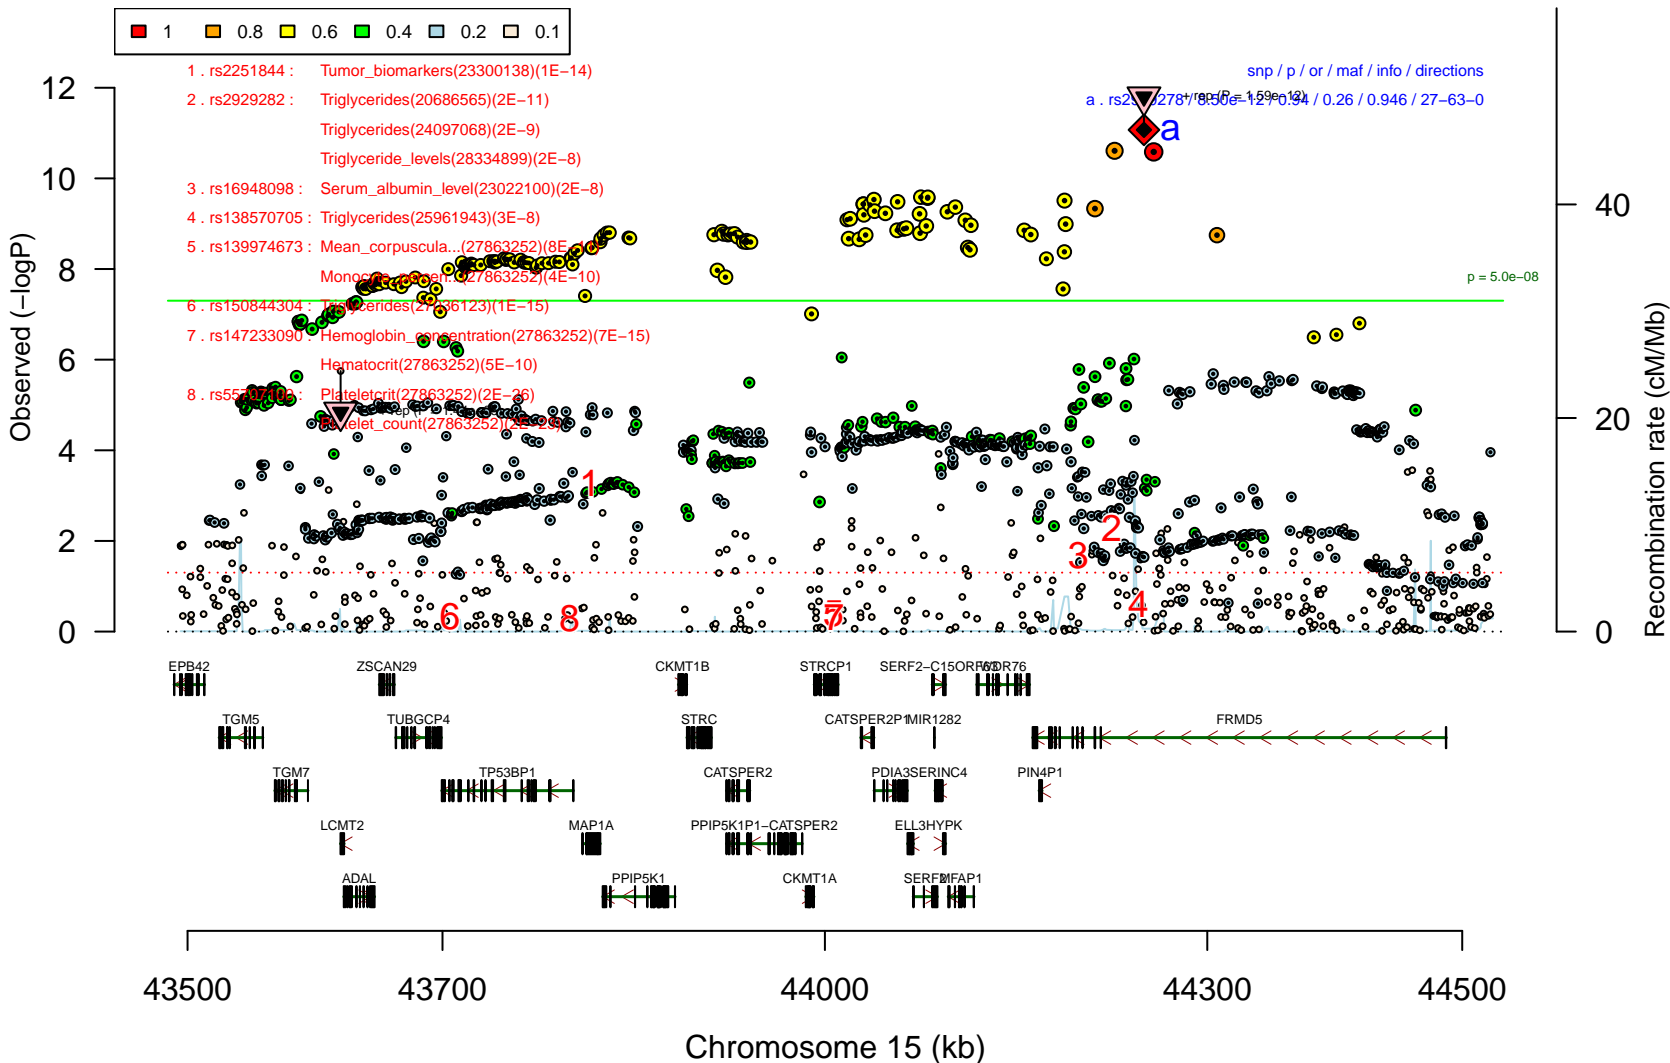

# PGC\_SCZ\_w3\_90\_0418b.176.chr11

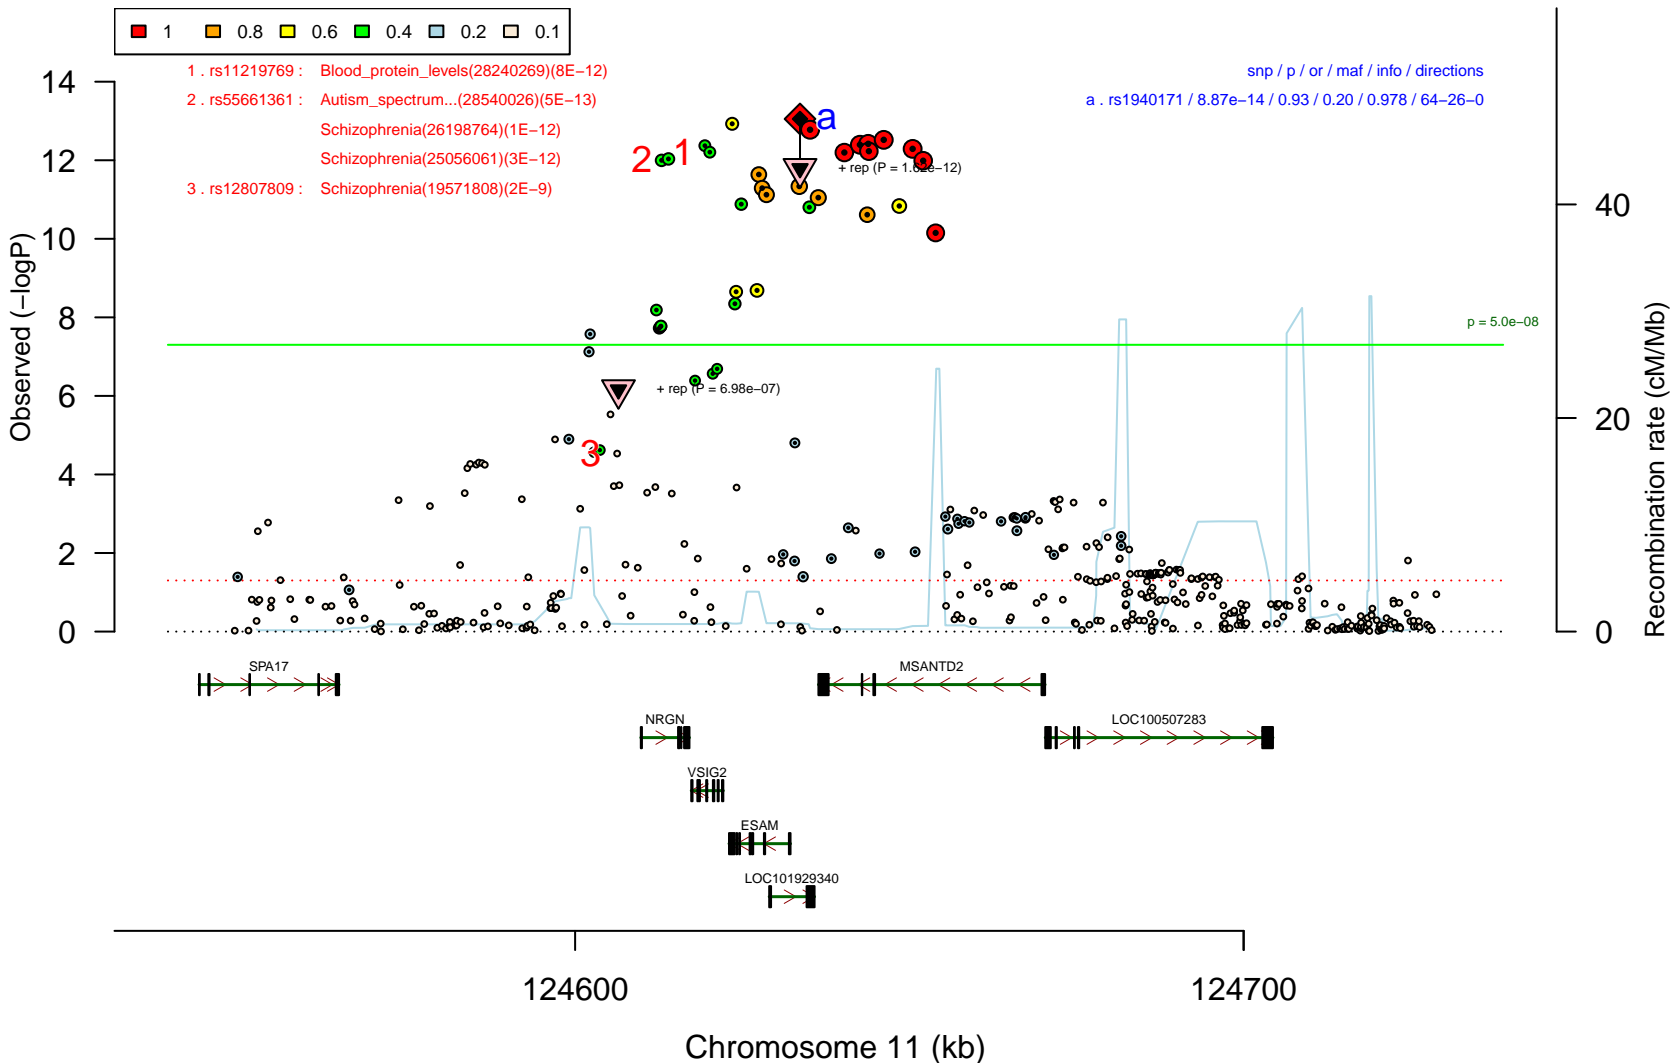

# PGC\_SCZ\_w3\_90\_0418b.13.chr1

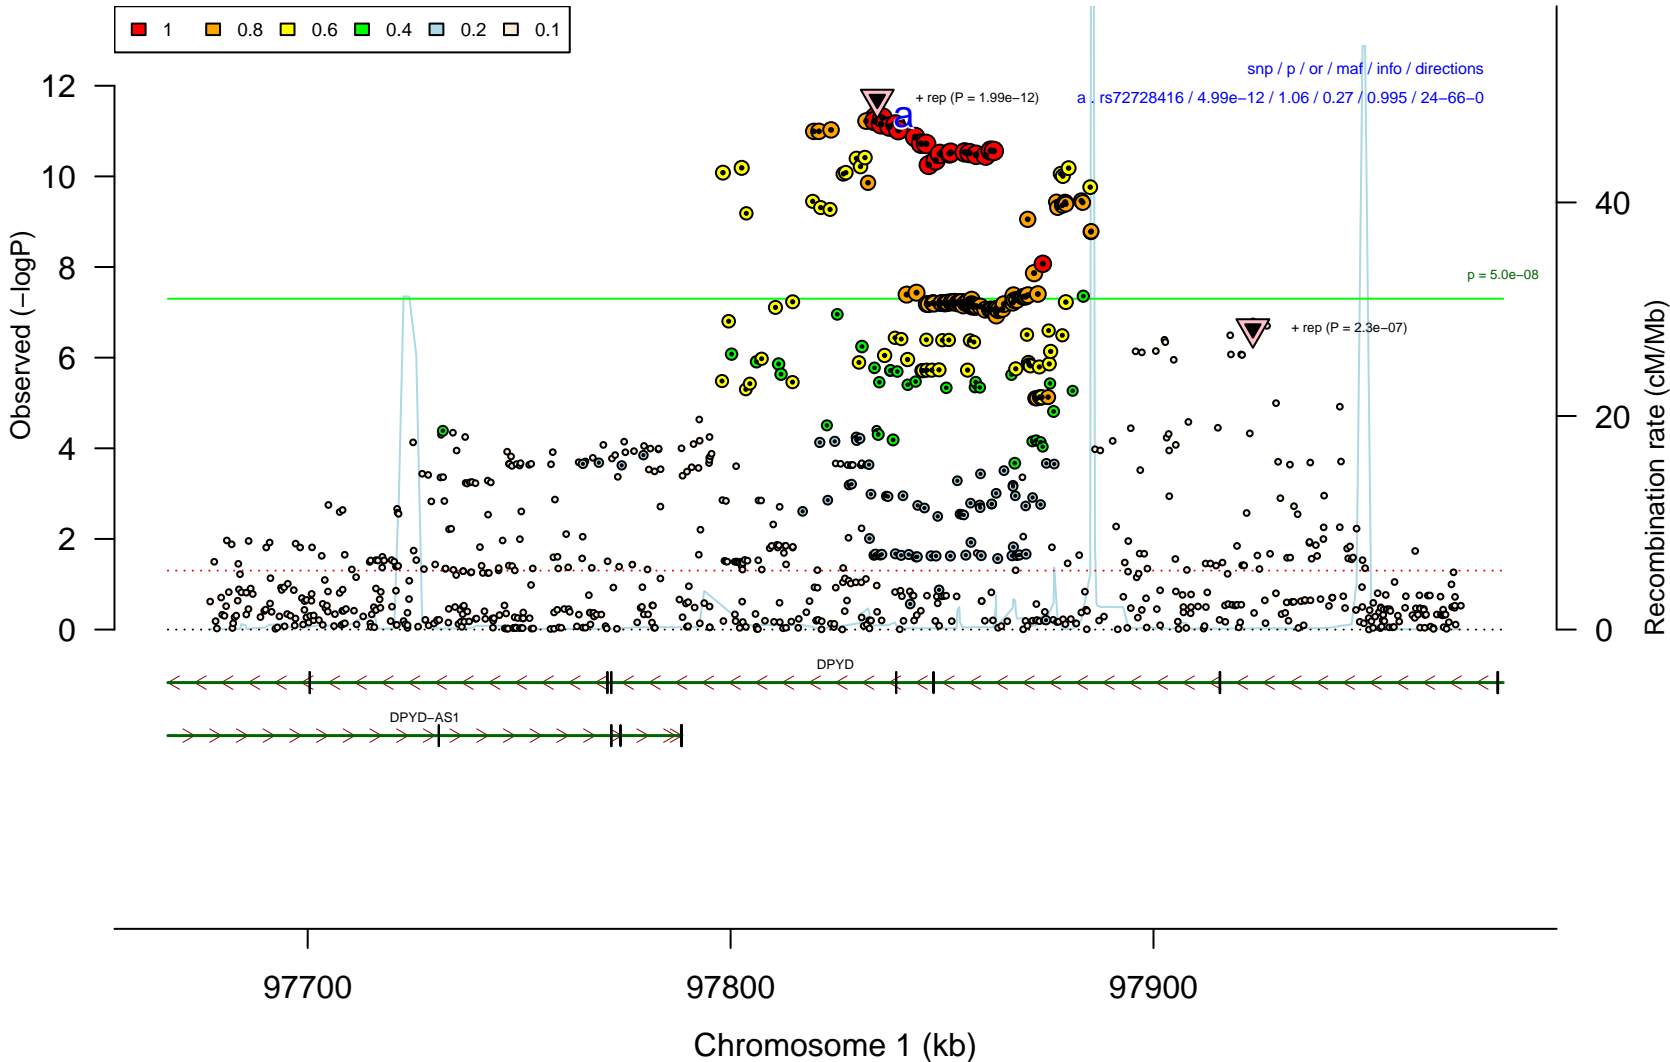

# PGC\_SCZ\_w3\_90\_0418b.21.chr1

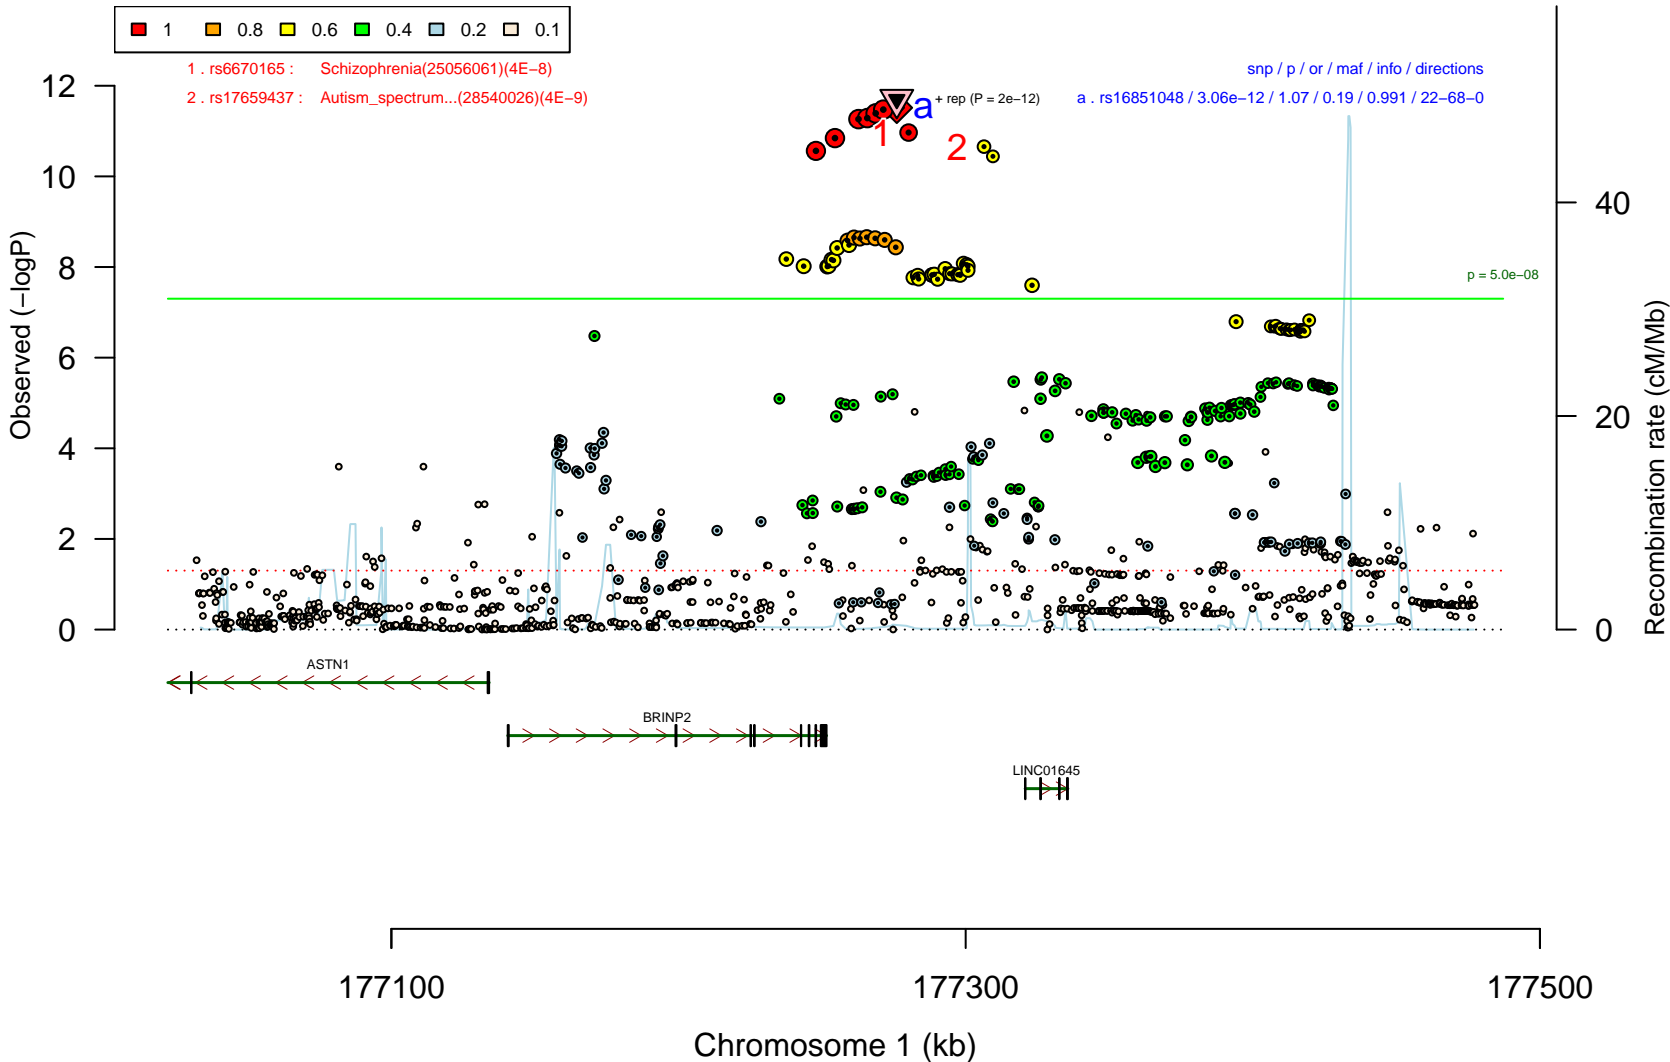

PGC\_SCZ\_w3\_90\_0418b.238.chr17

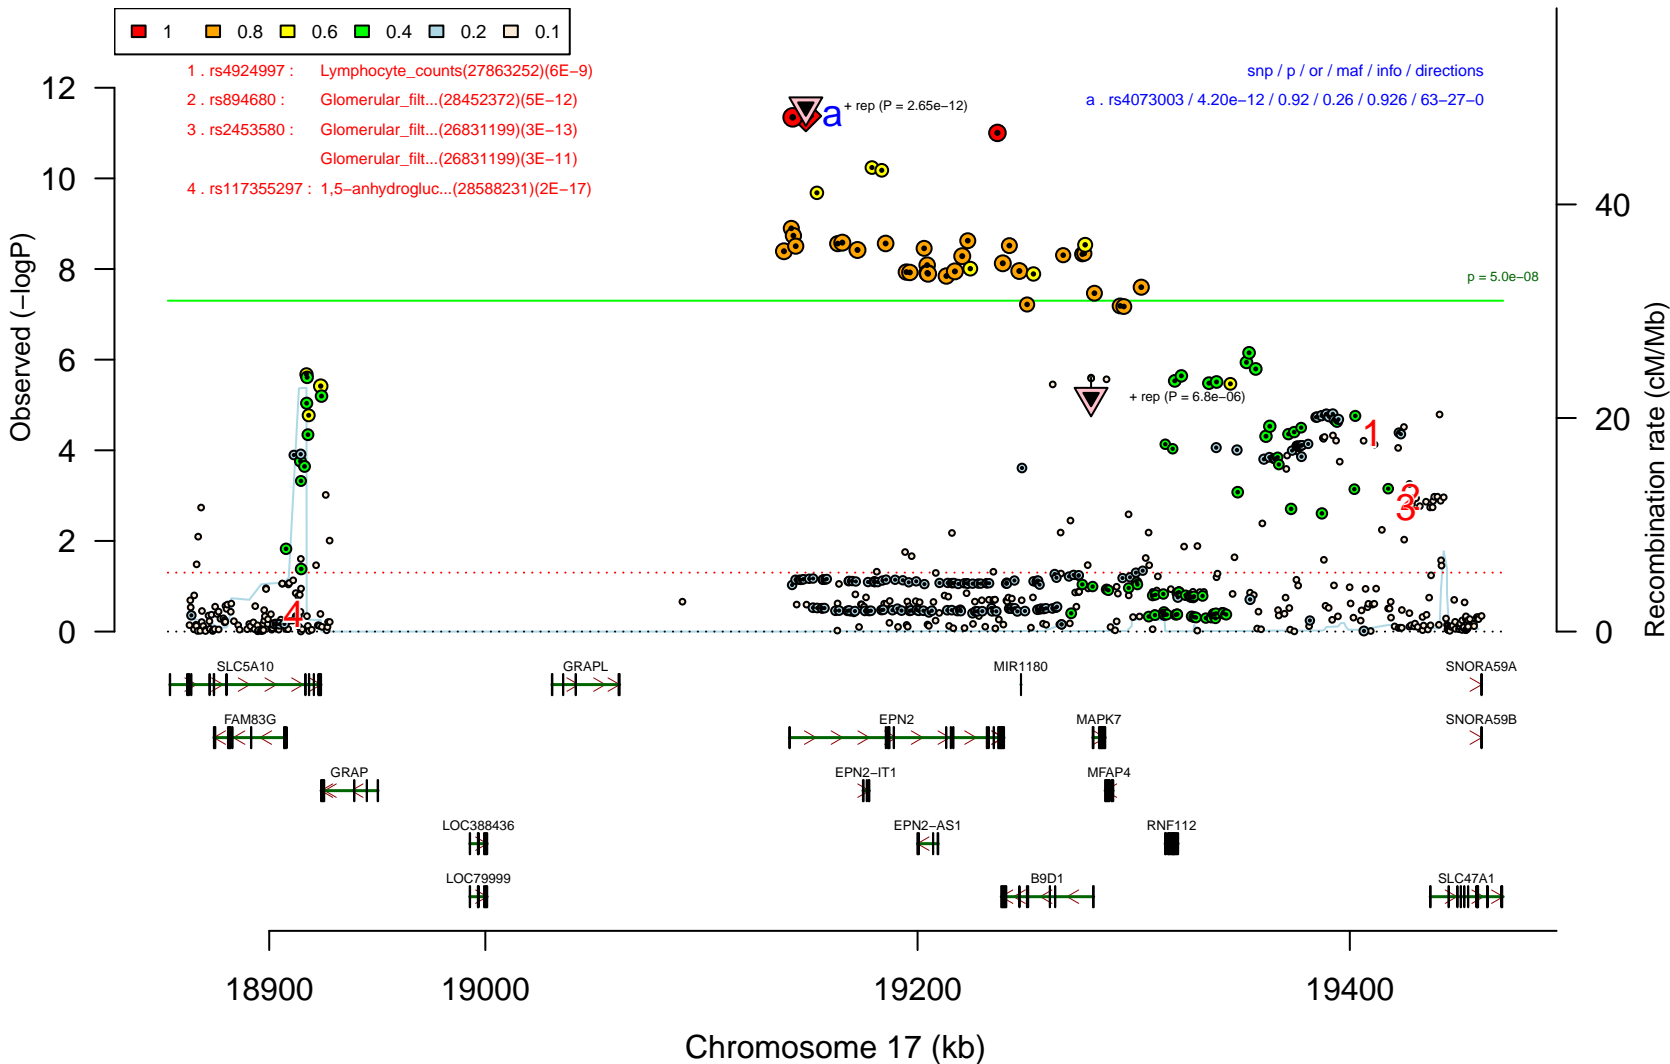

# PGC\_SCZ\_w3\_90\_0418b.127.chr7

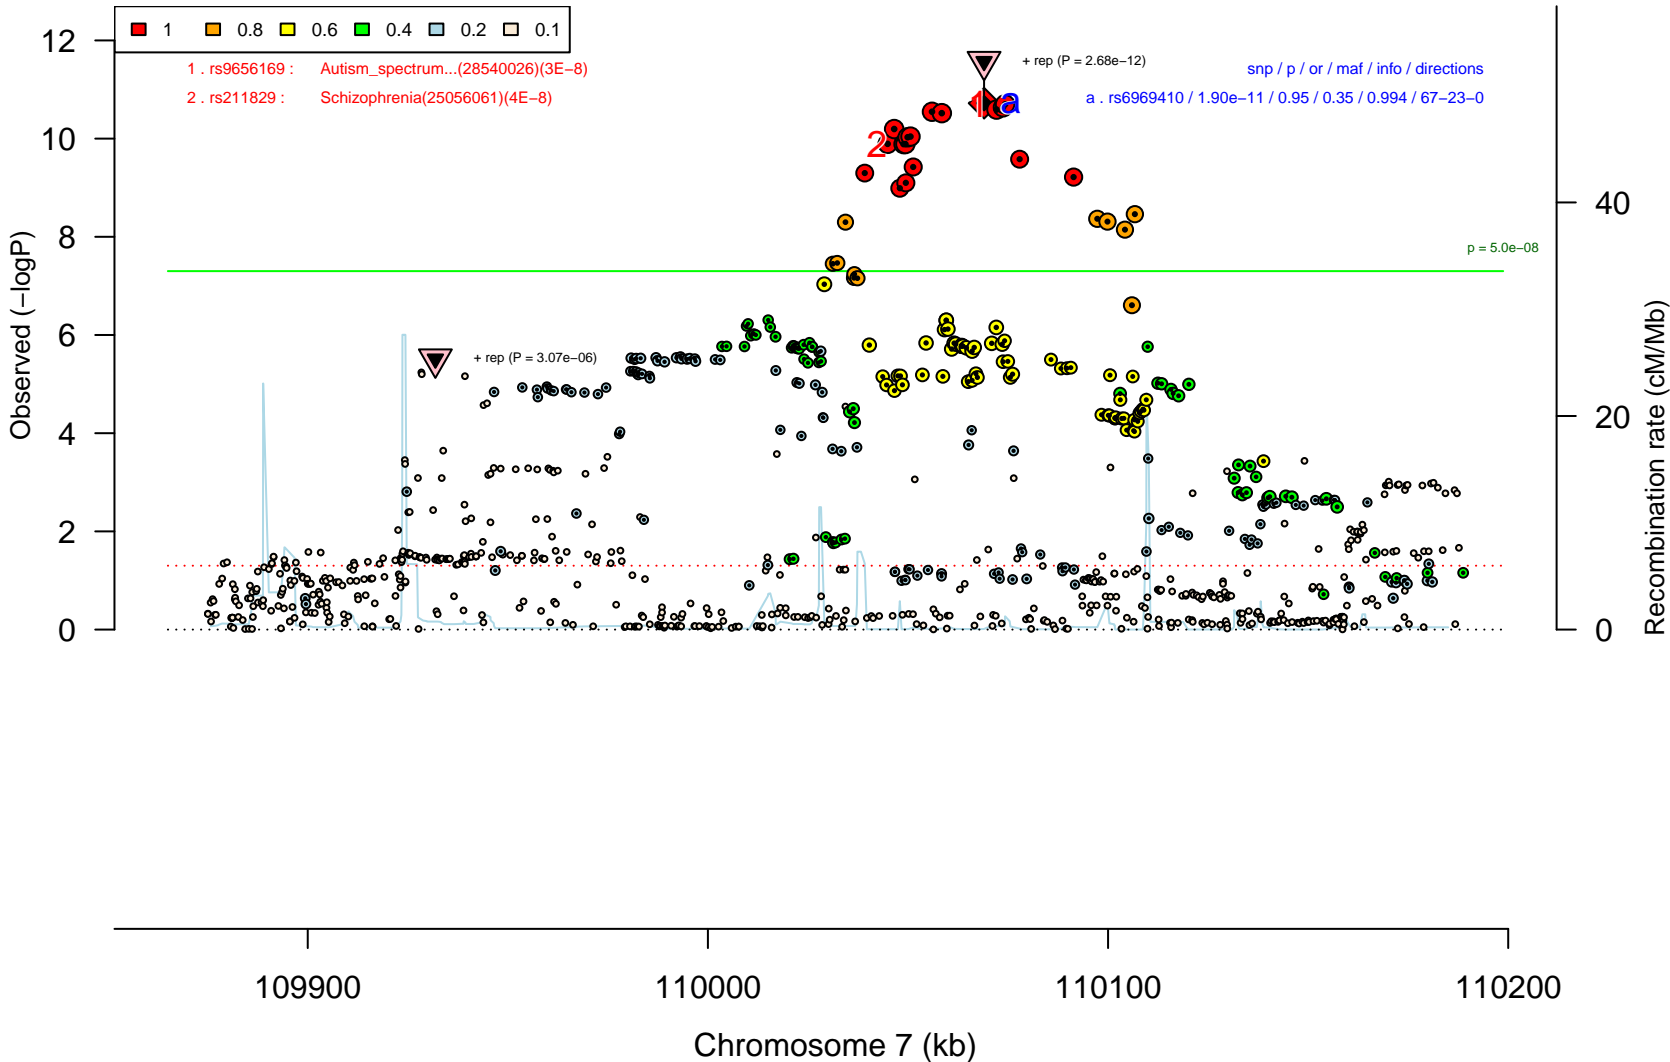



# PGC\_SCZ\_w3\_90\_0418b.55.chr3

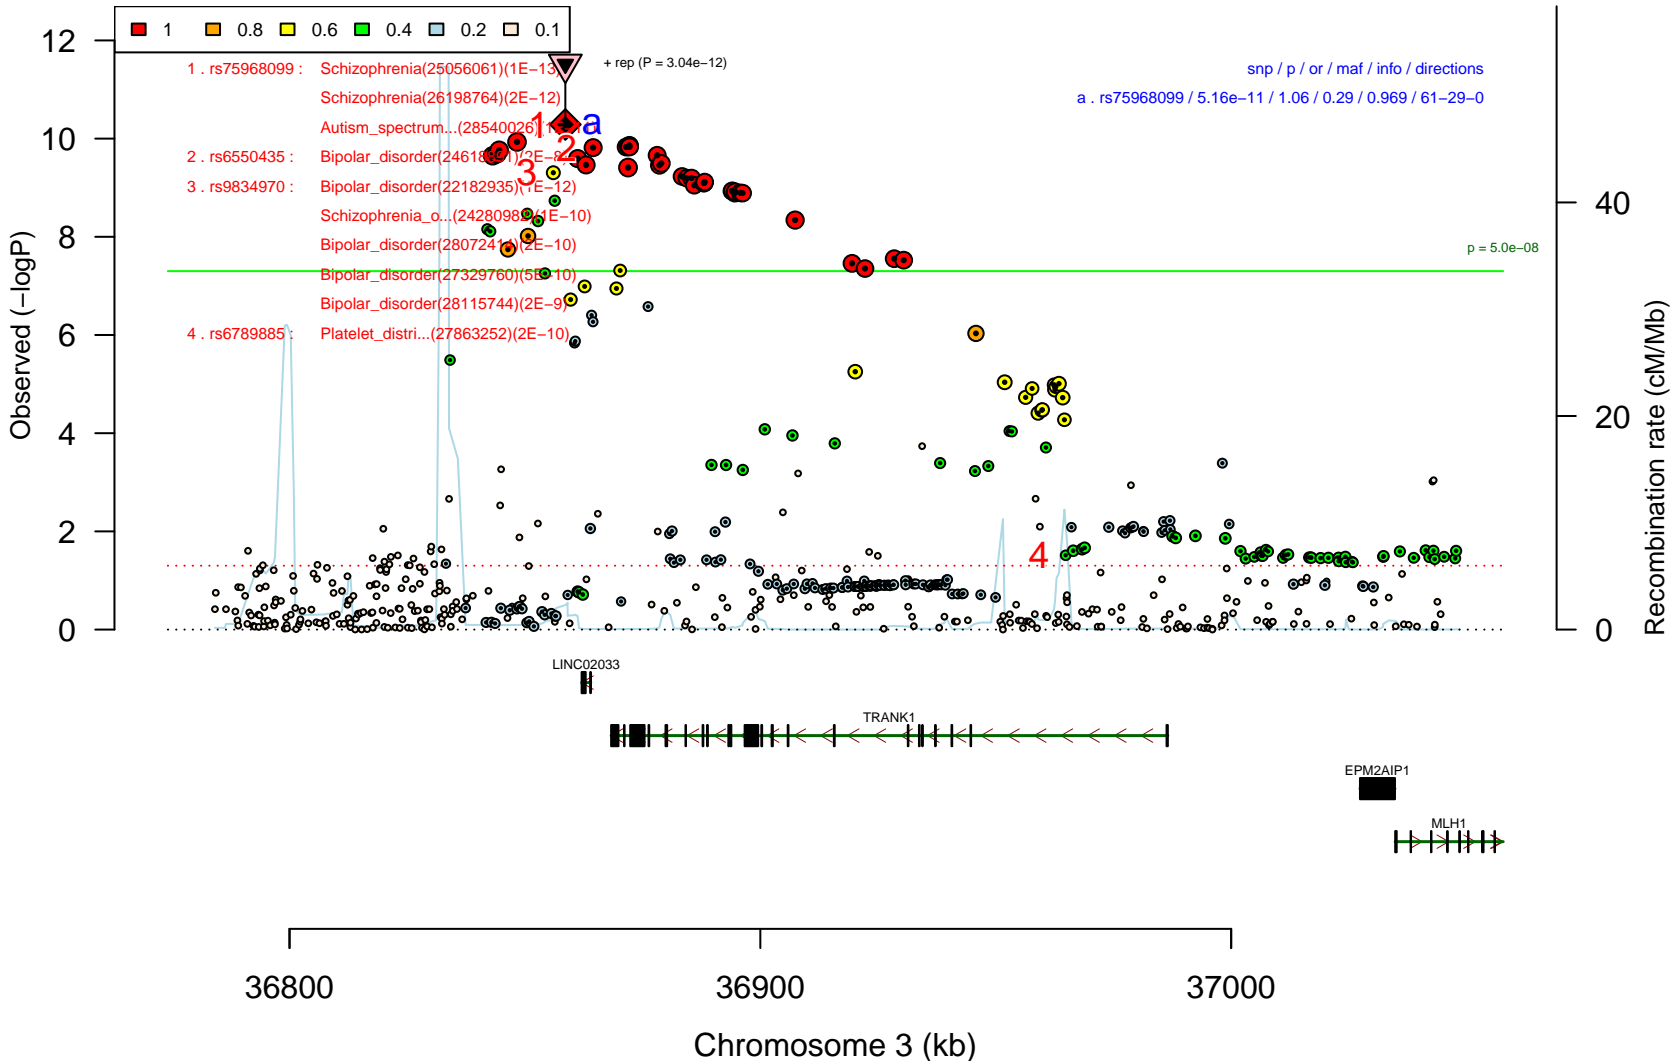

# PGC\_SCZ\_w3\_90\_0418b.137.chr8

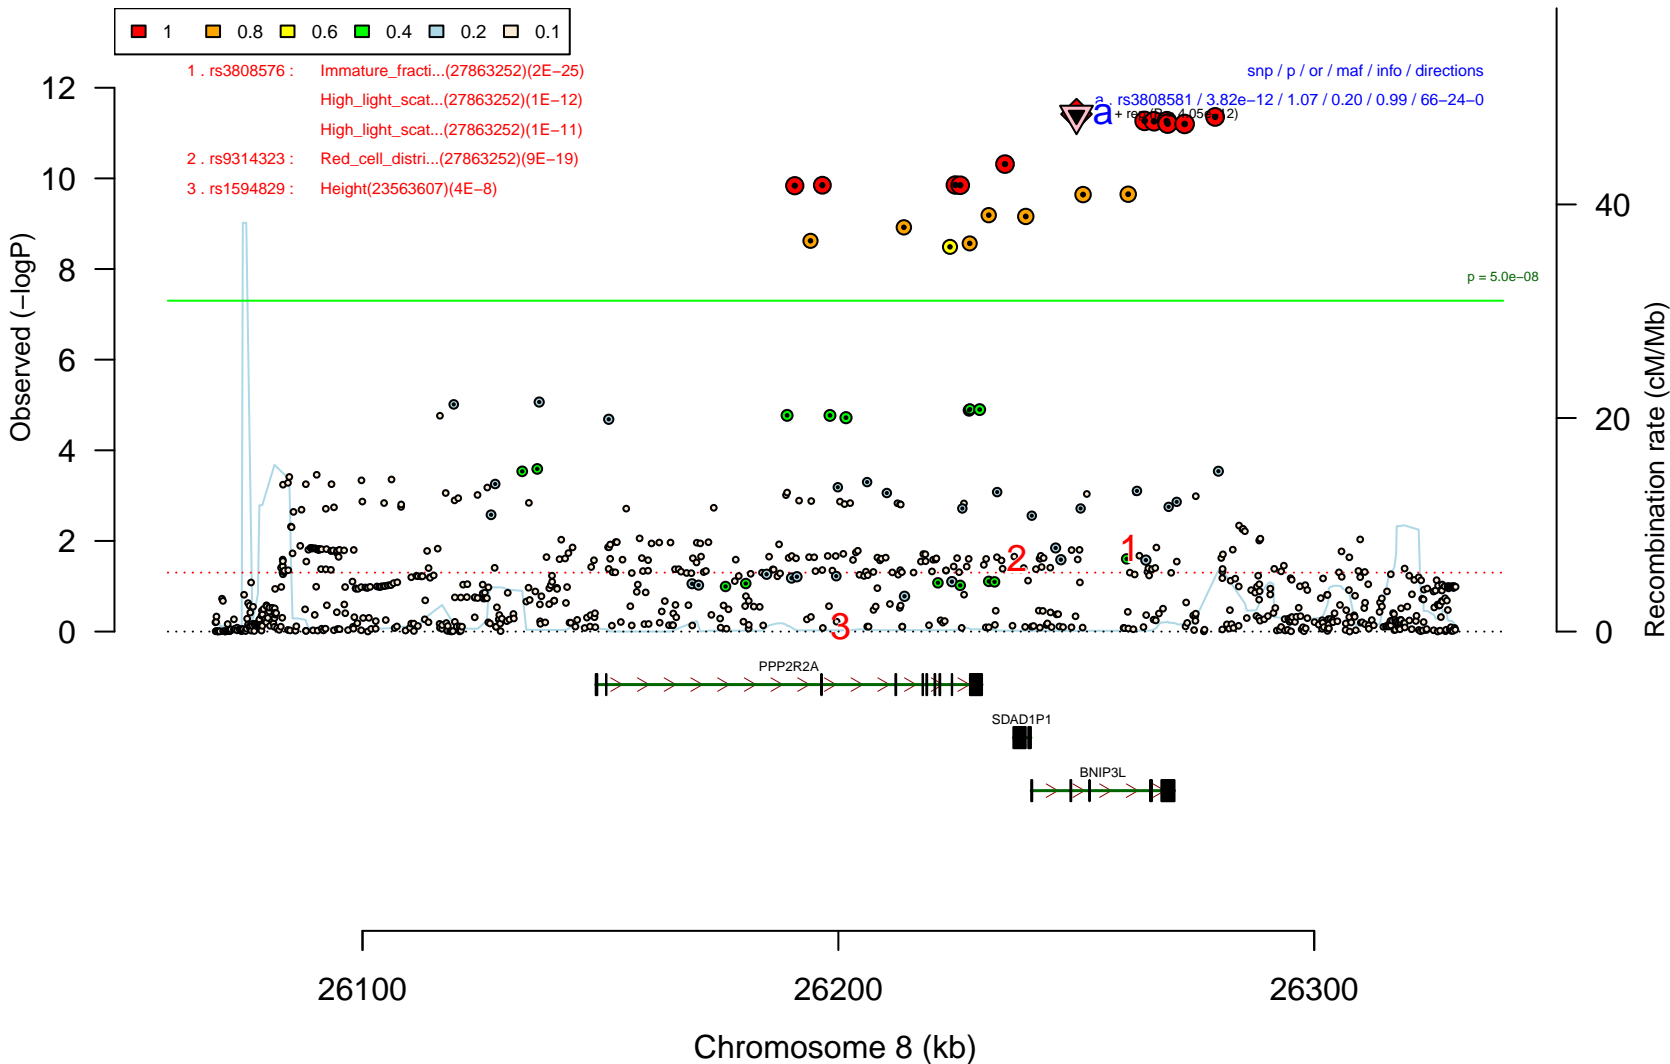

# PGC\_SCZ\_w3\_90\_0418b.119.chr7

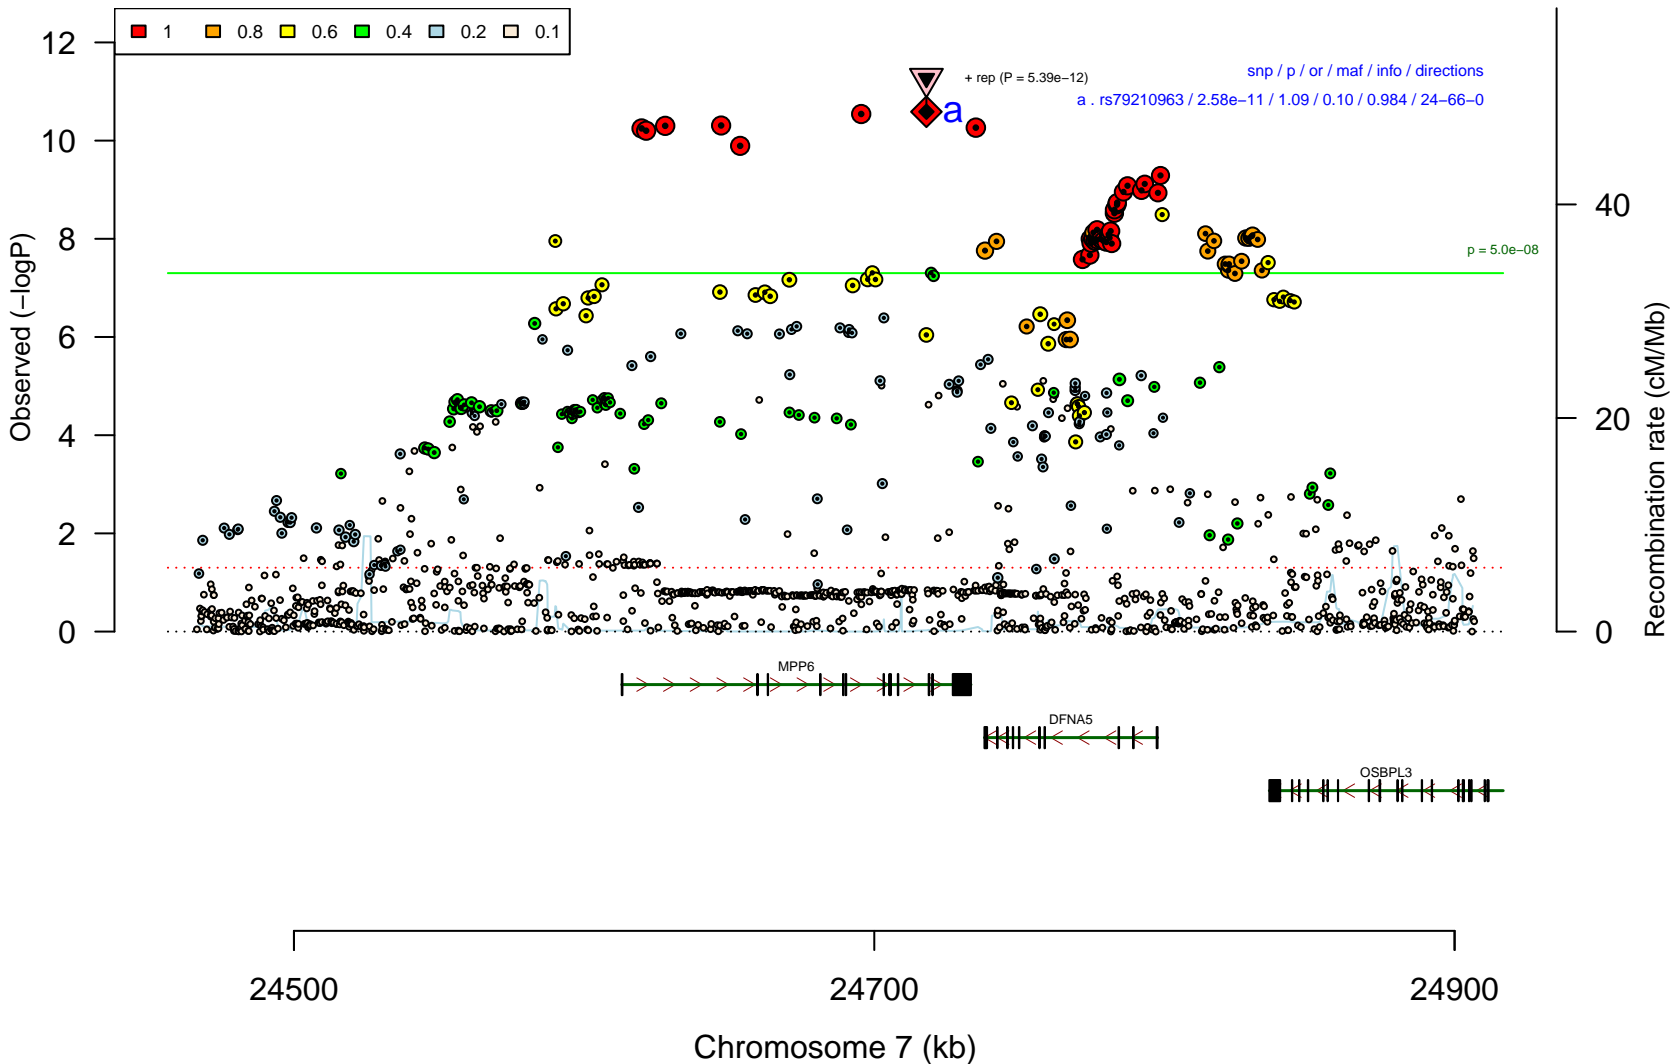

# PGC\_SCZ\_w3\_90\_0418b.26.chr1

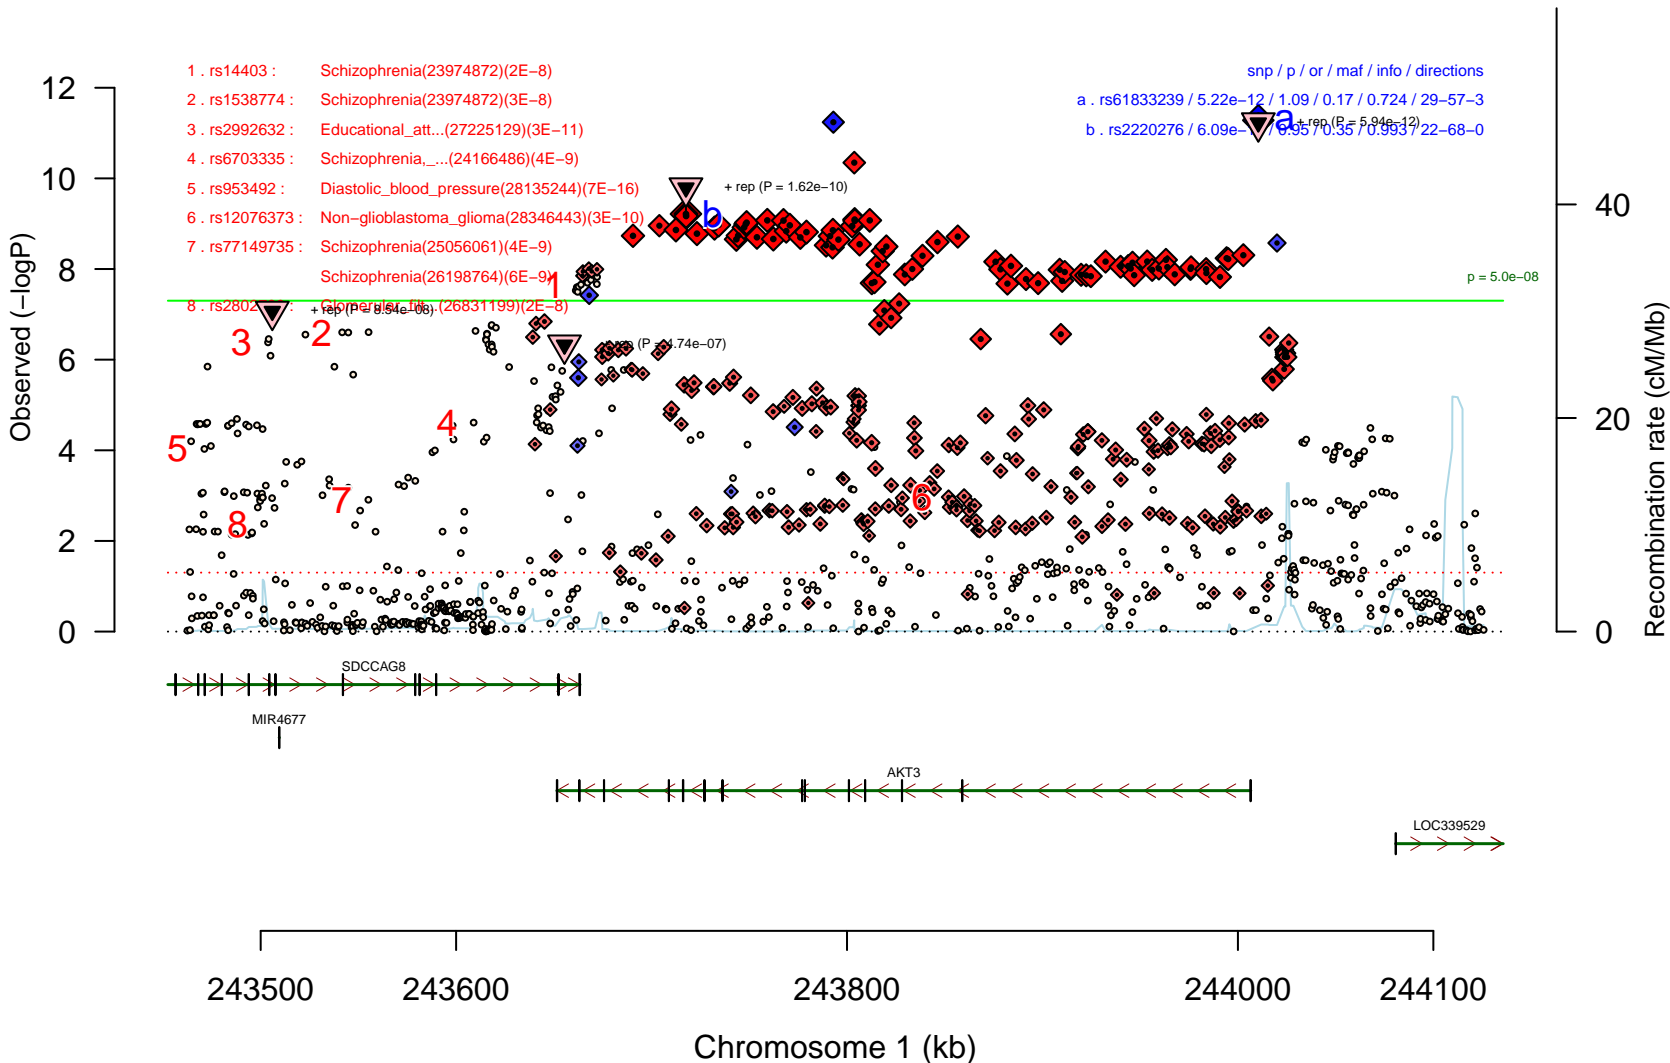

# PGC\_SCZ\_w3\_90\_0418b.41.chr2

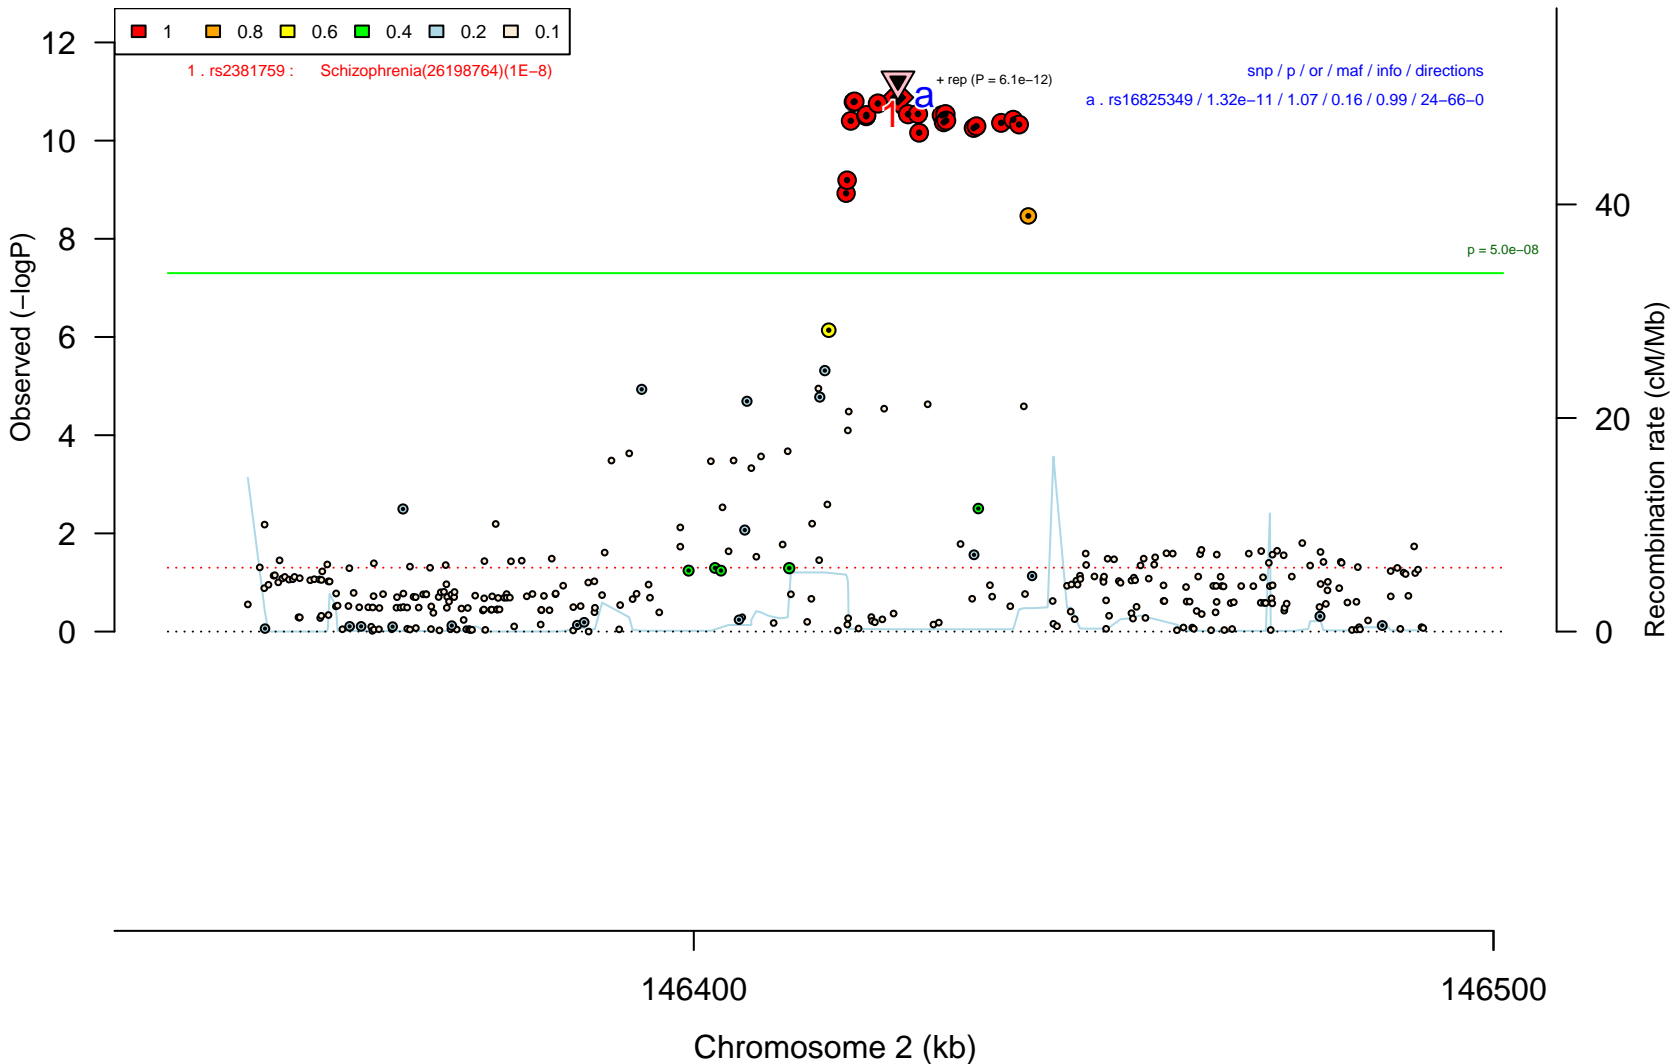

# PGC\_SCZ\_w3\_90\_0418b.180.chr11

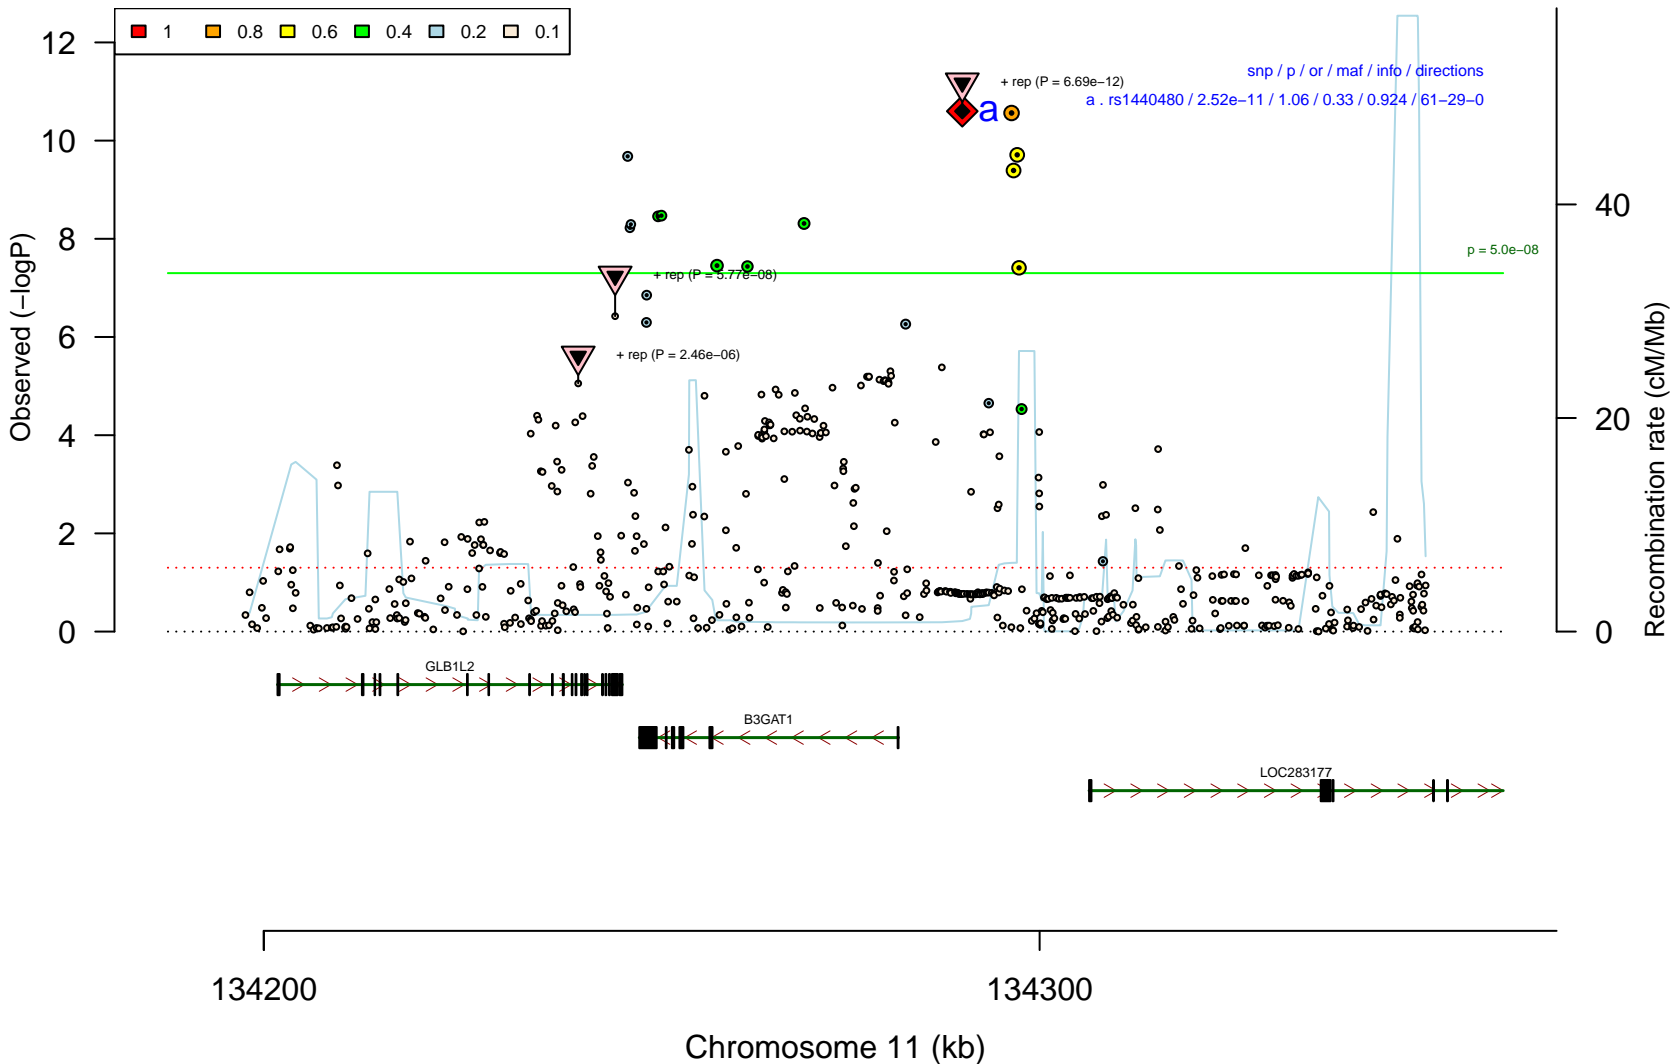

# PGC\_SCZ\_w3\_90\_0418b.92.chr5

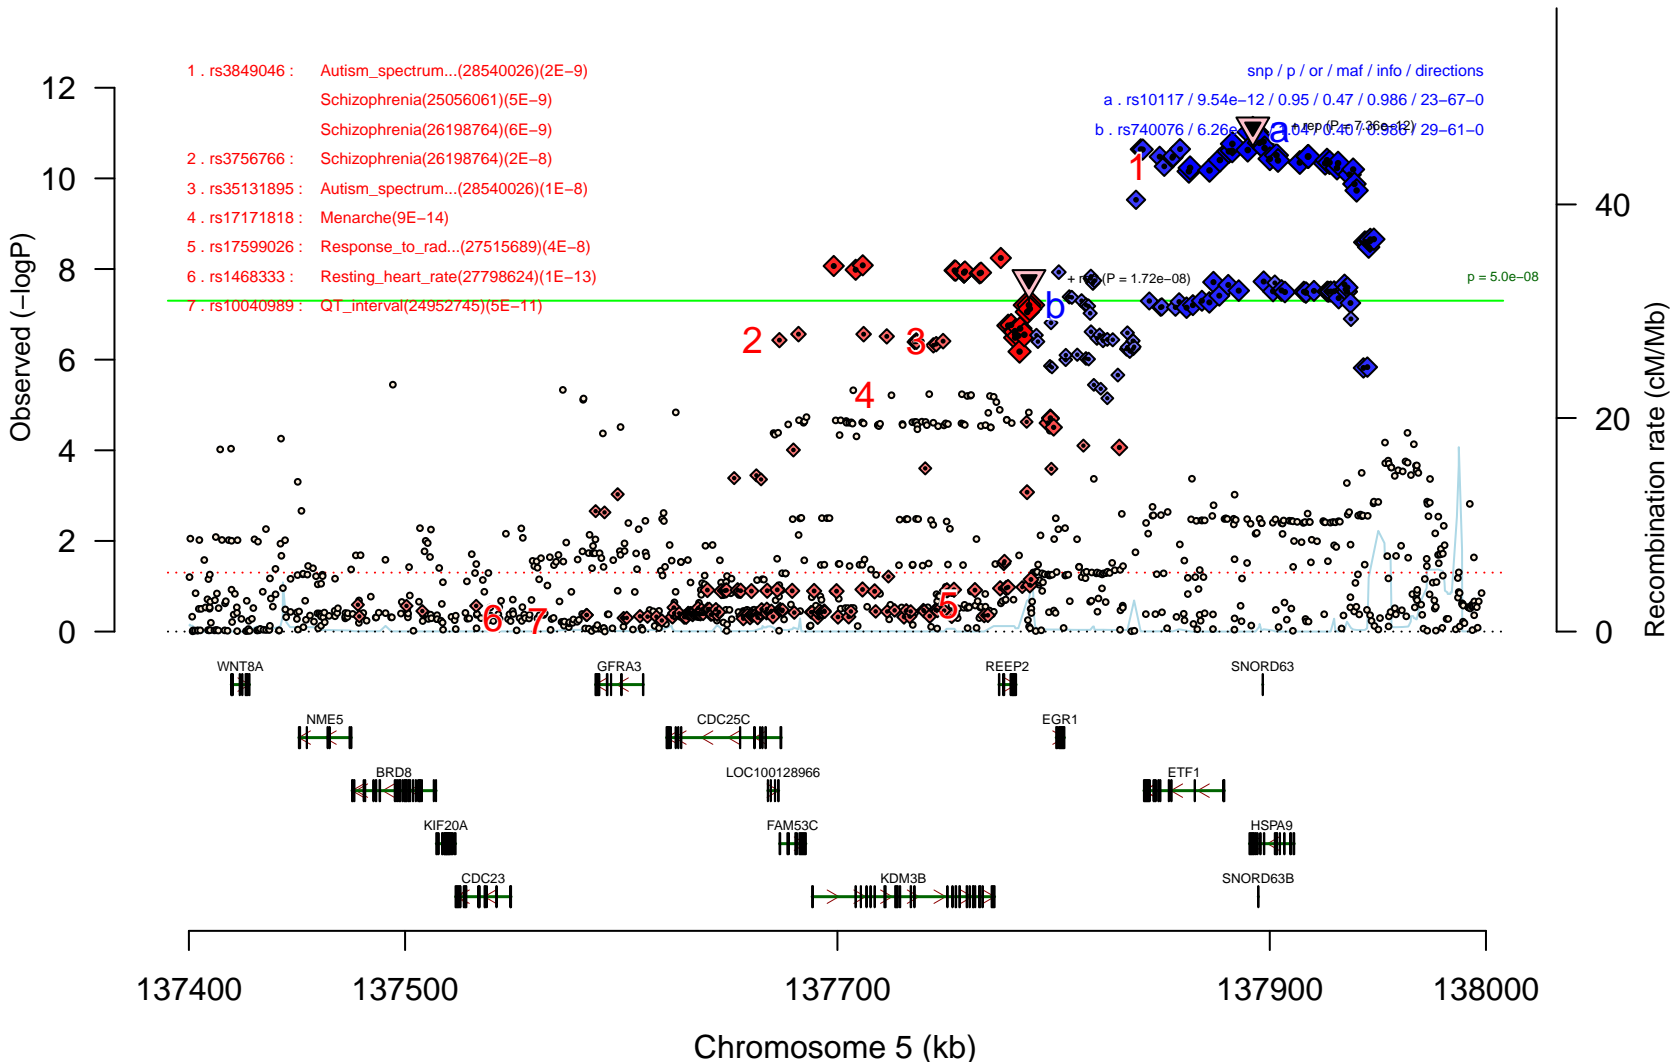

# PGC\_SCZ\_w3\_90\_0418b.244.chr18

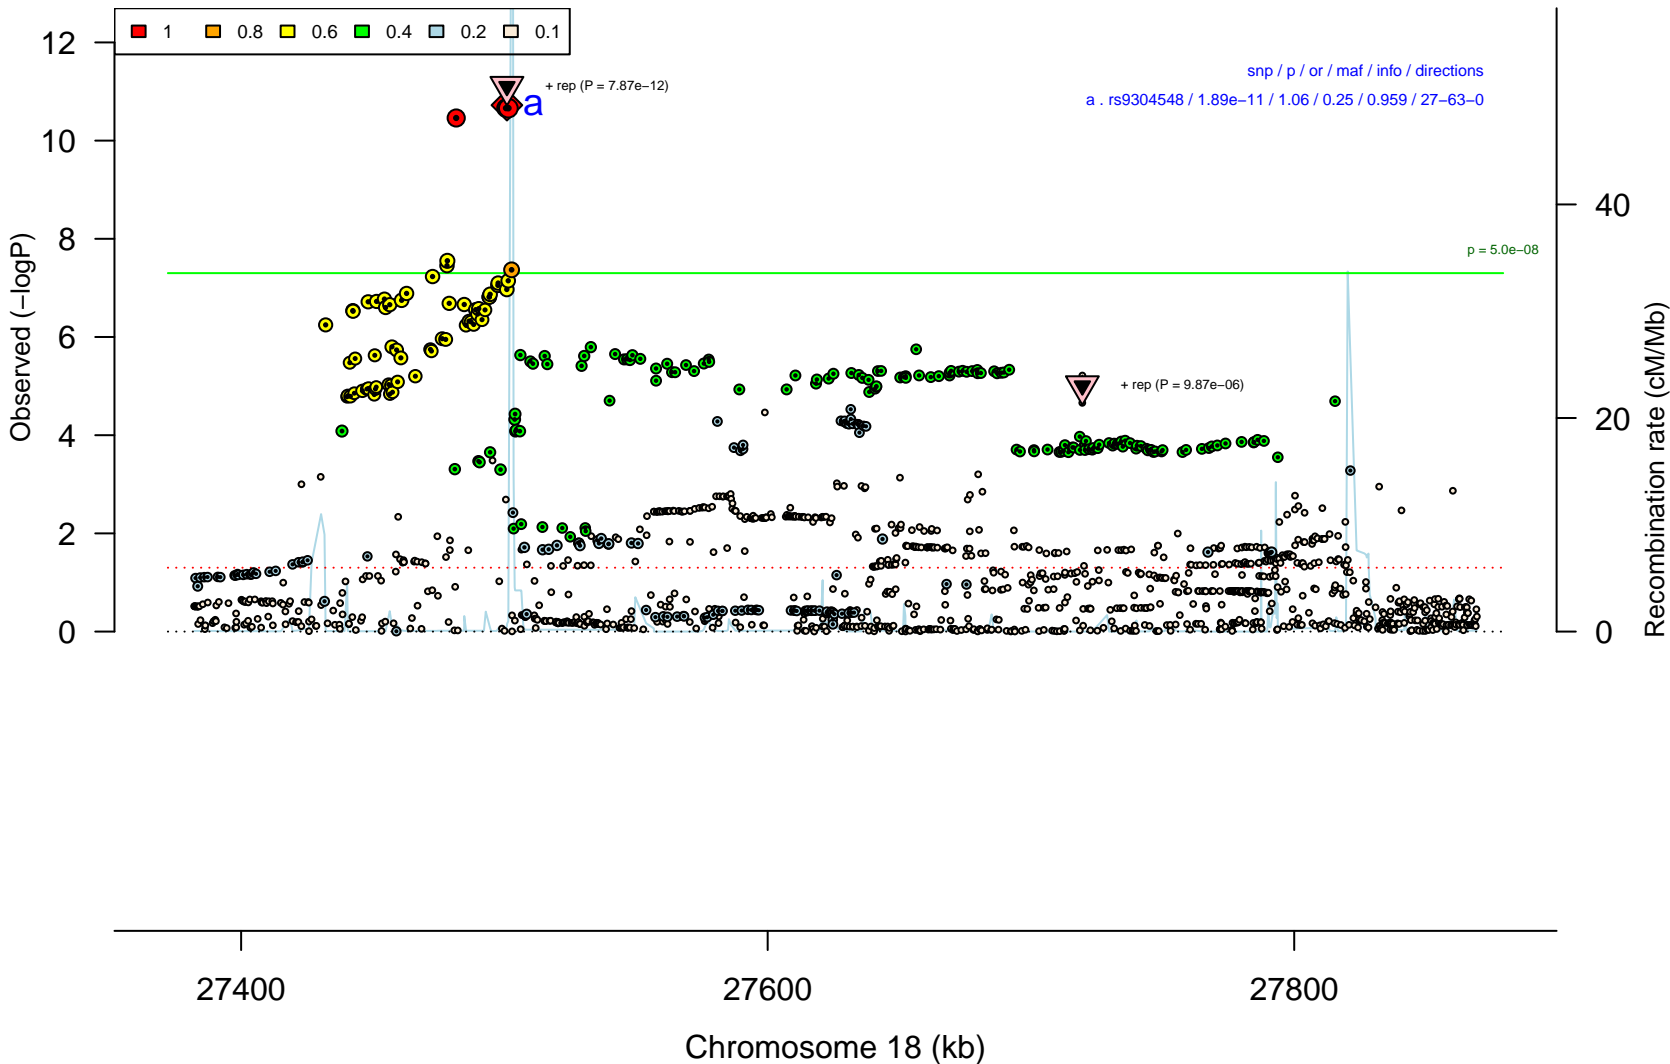



# PGC\_SCZ\_w3\_90\_0418b.134.chr8

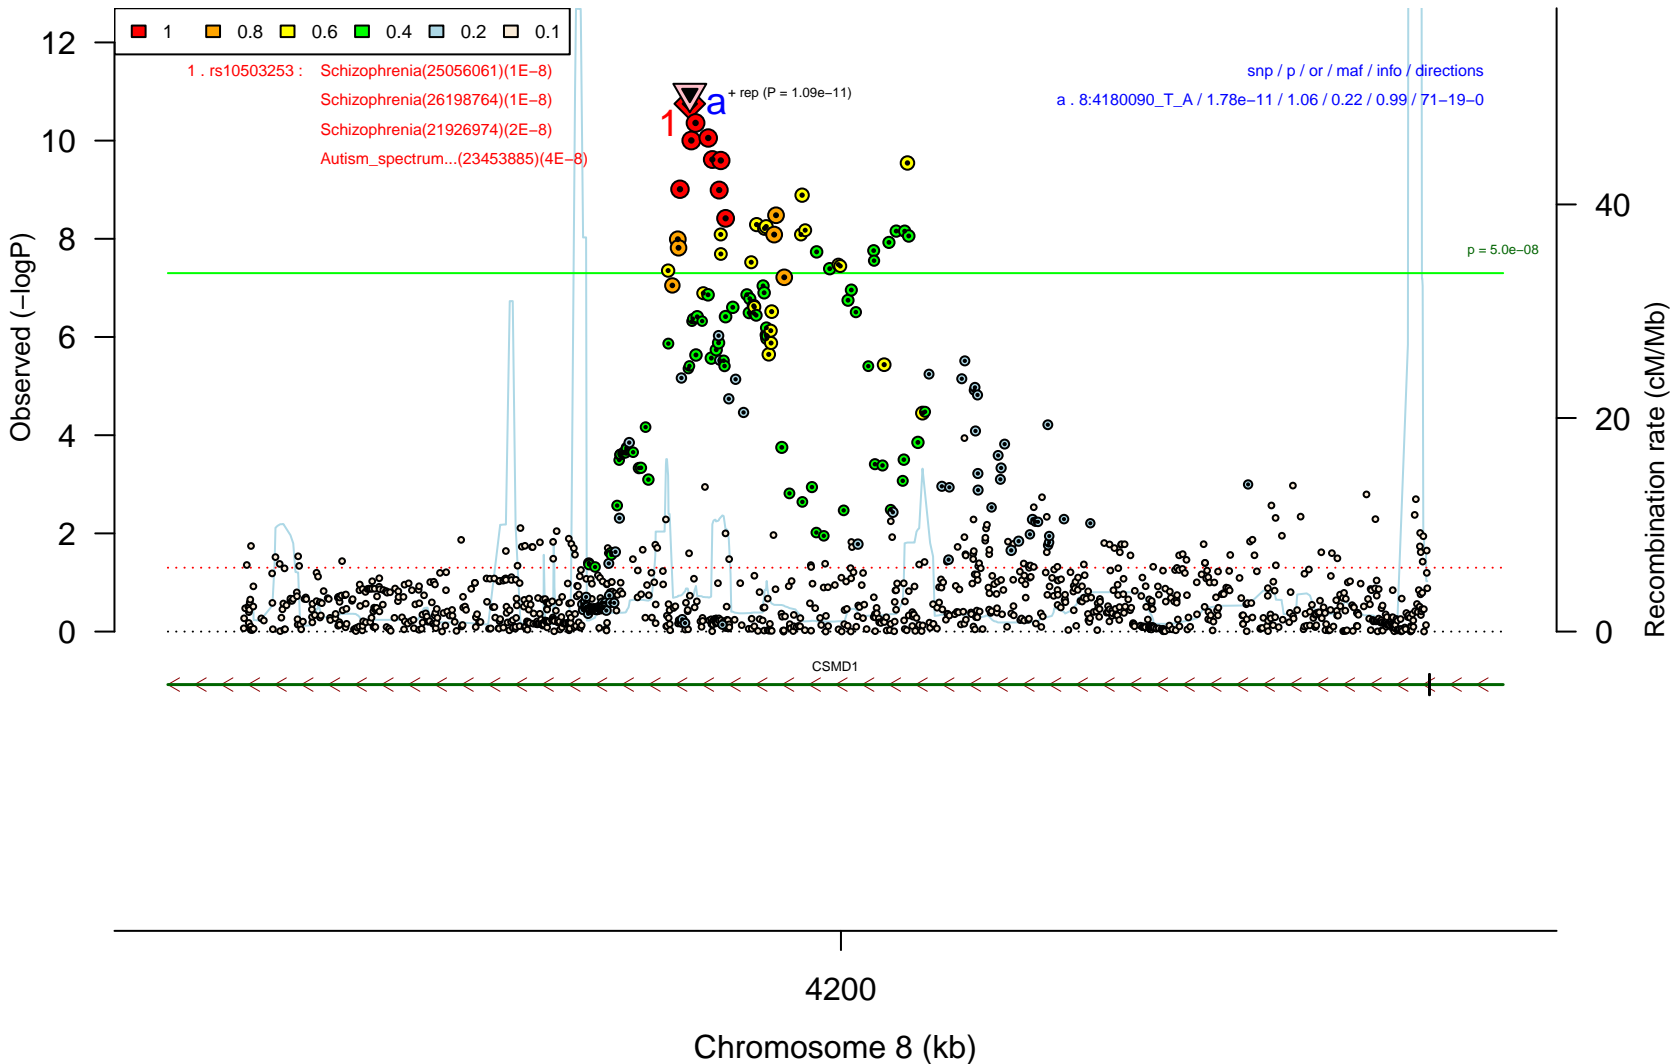

# PGC\_SCZ\_w3\_90\_0418b.218.chr15

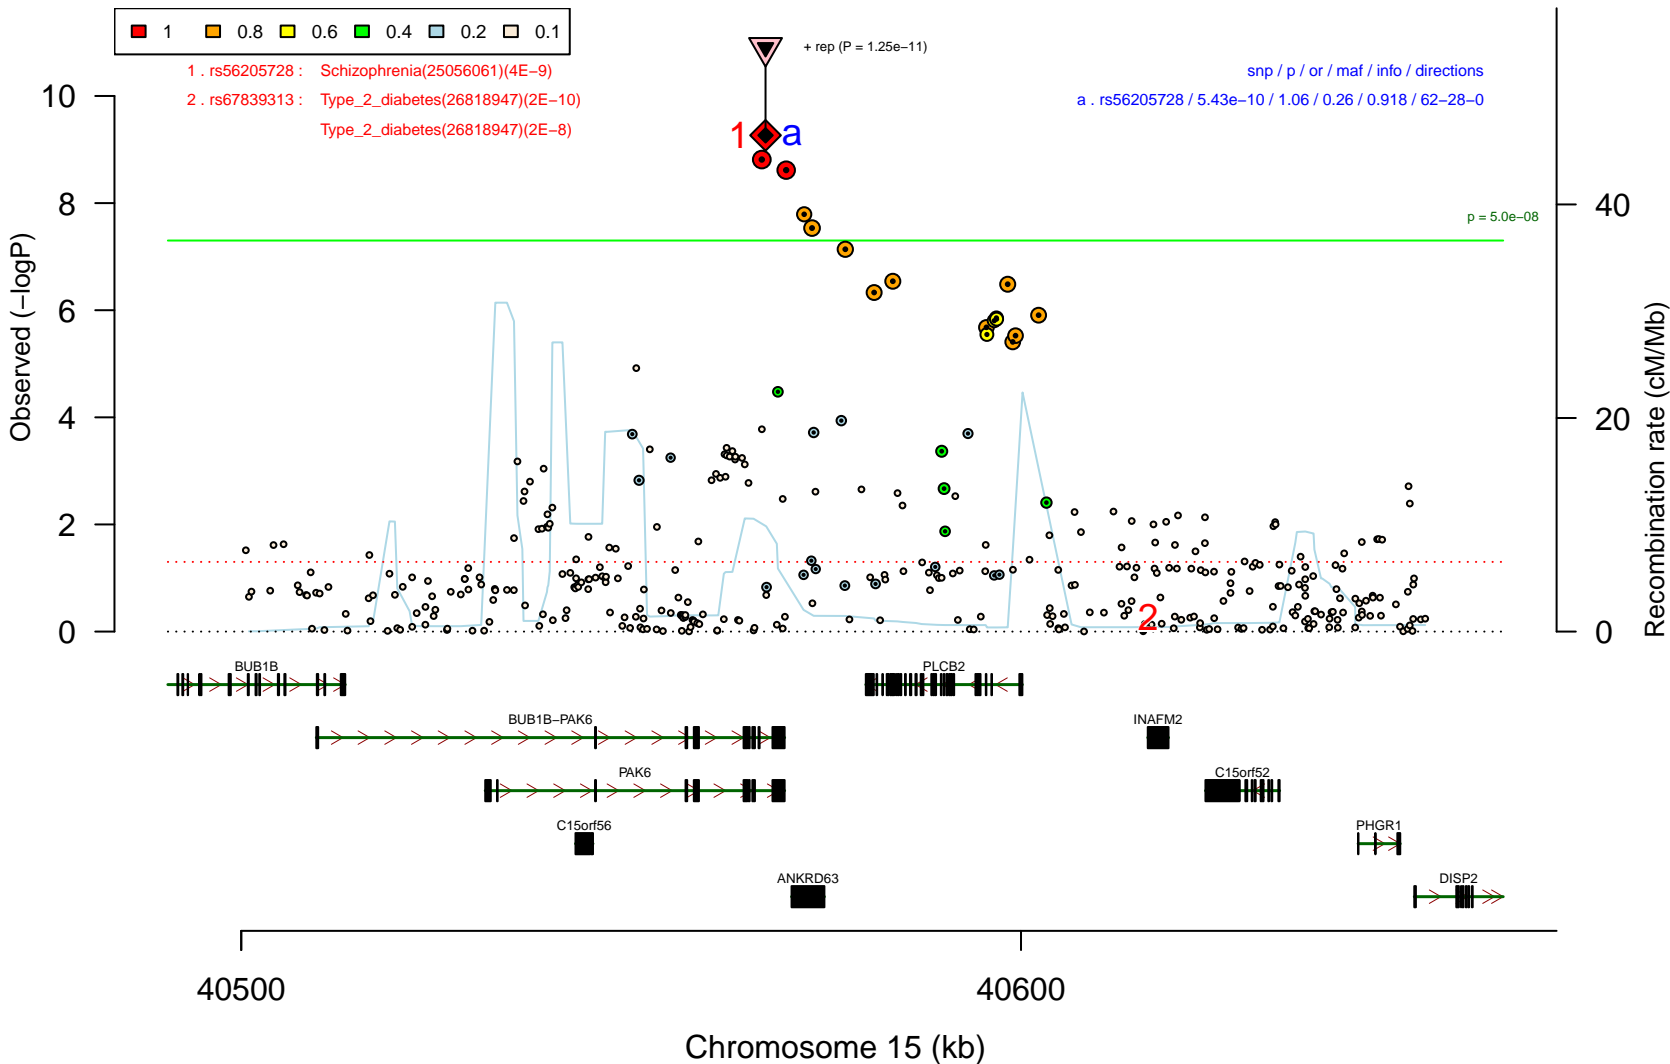

# PGC\_SCZ\_w3\_90\_0418b.100.chr6

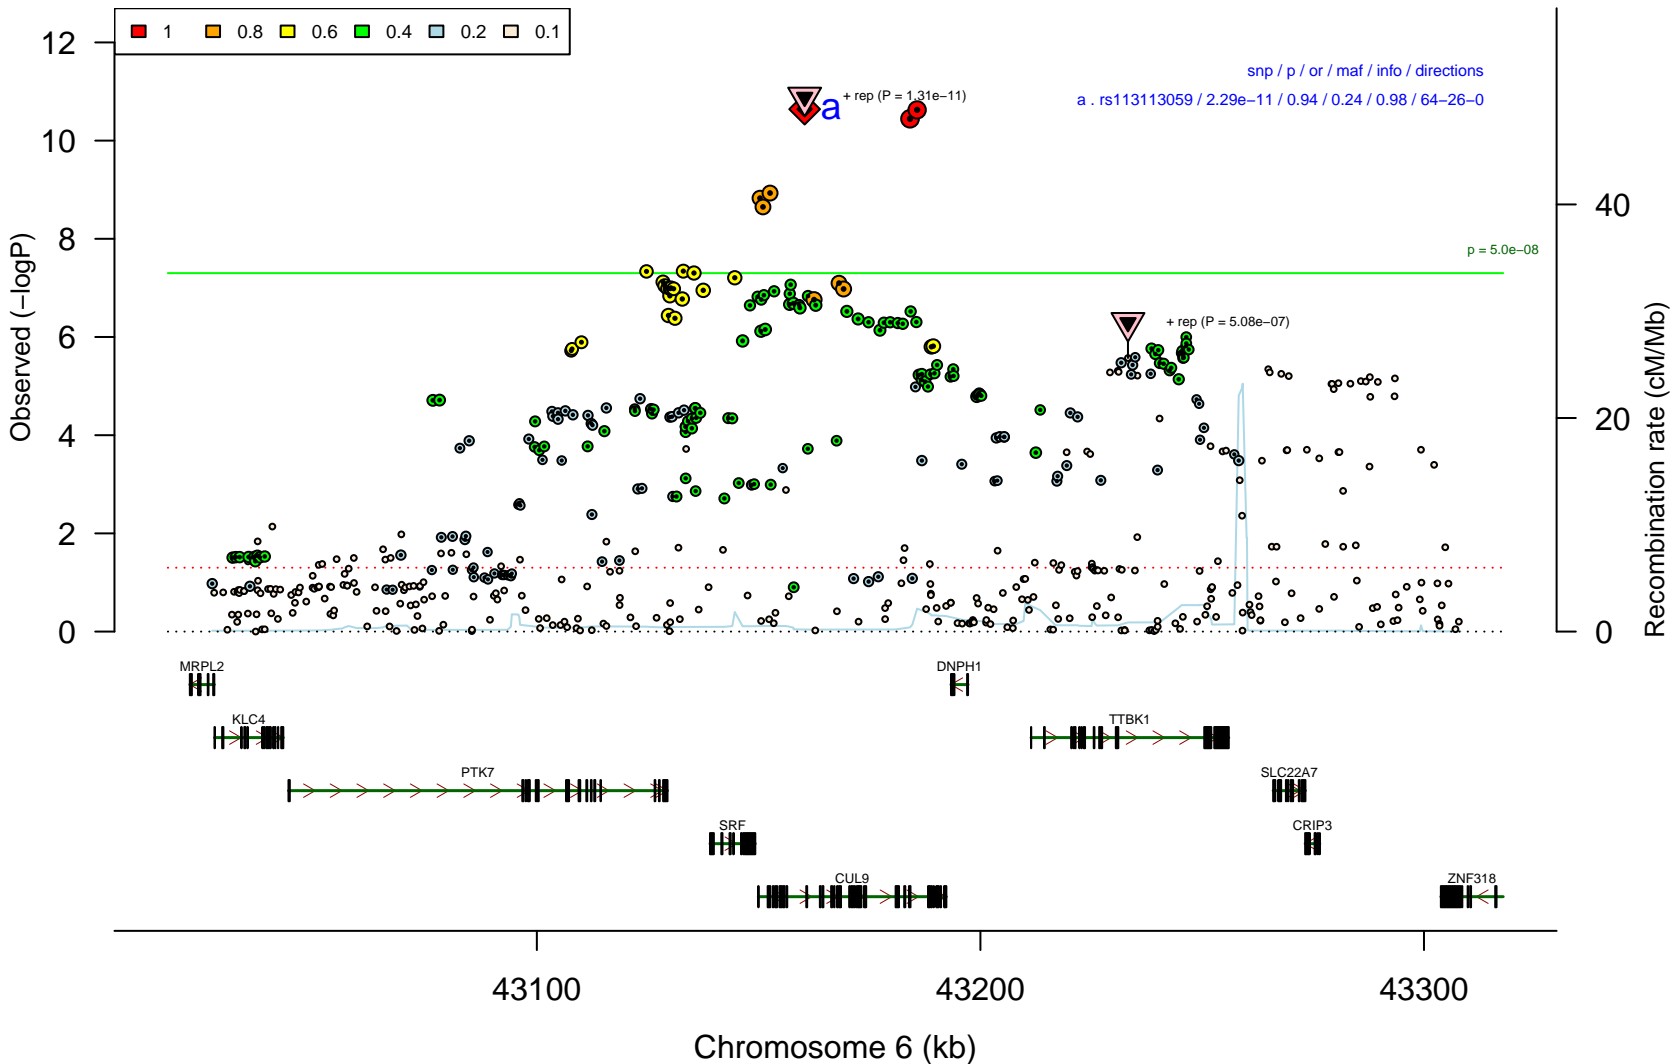

PGC SCZ w3 90 0418b.236.chr17

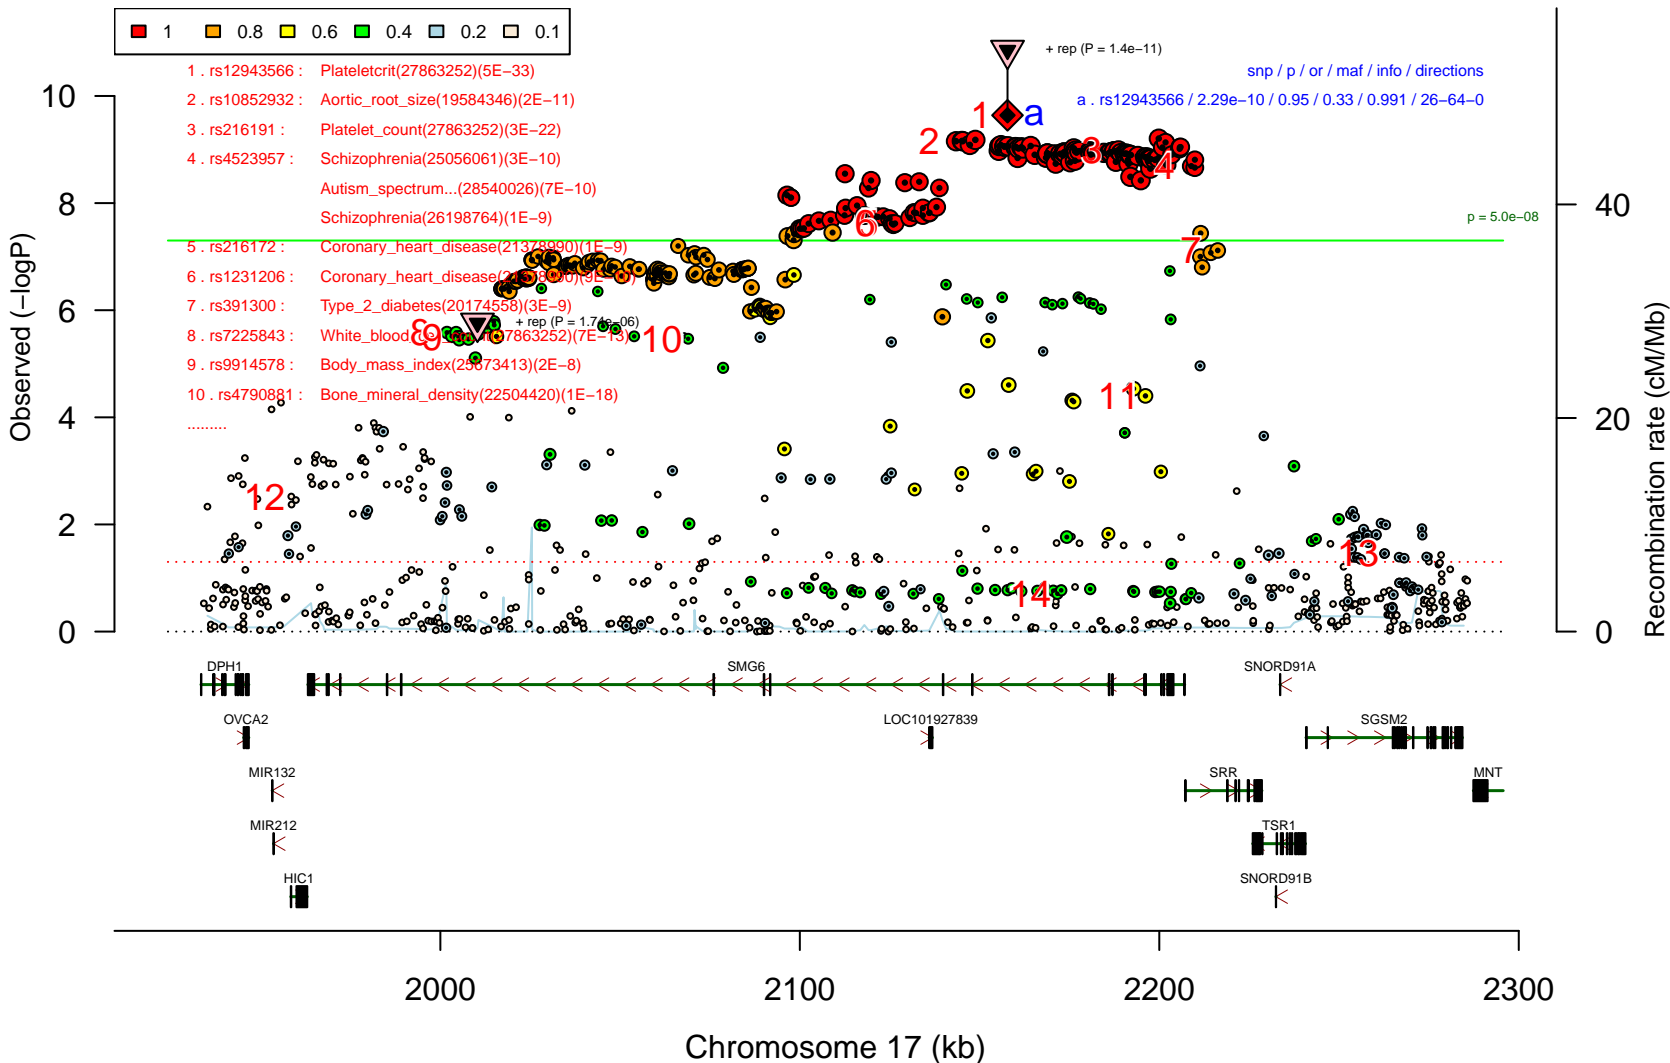

# PGC\_SCZ\_w3\_90\_0418b.70.chr4

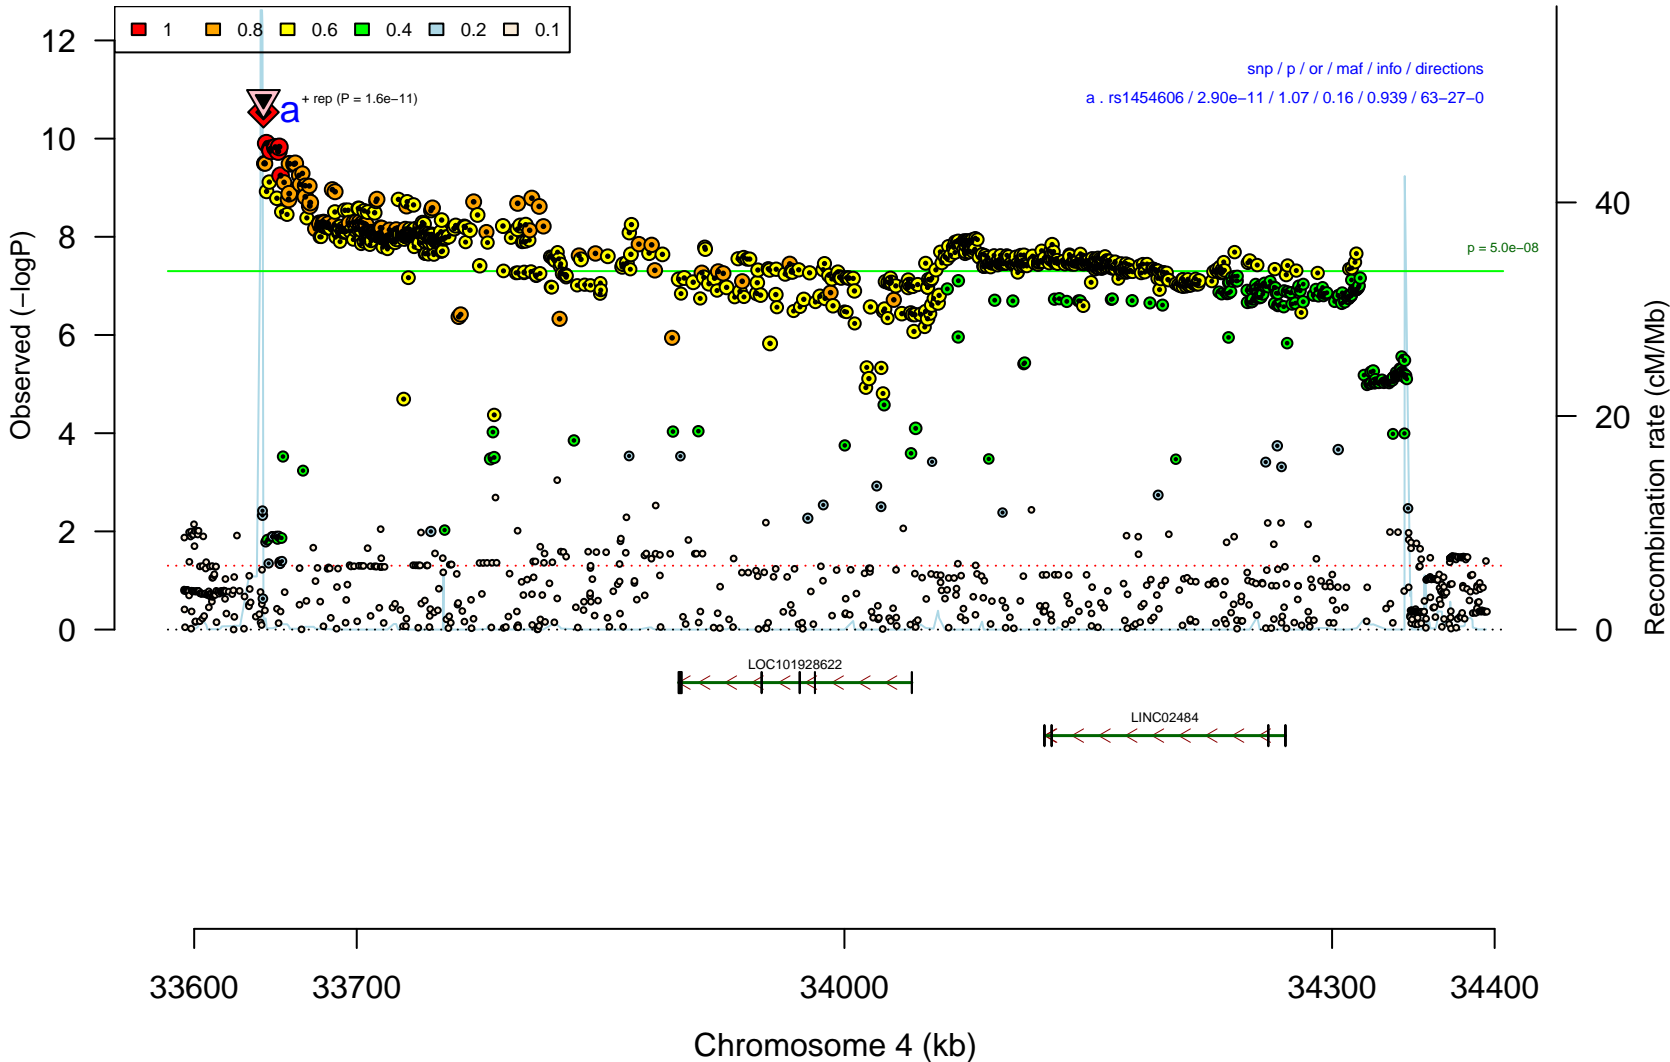

# PGC\_SCZ\_w3\_90\_0418b.183.chr12

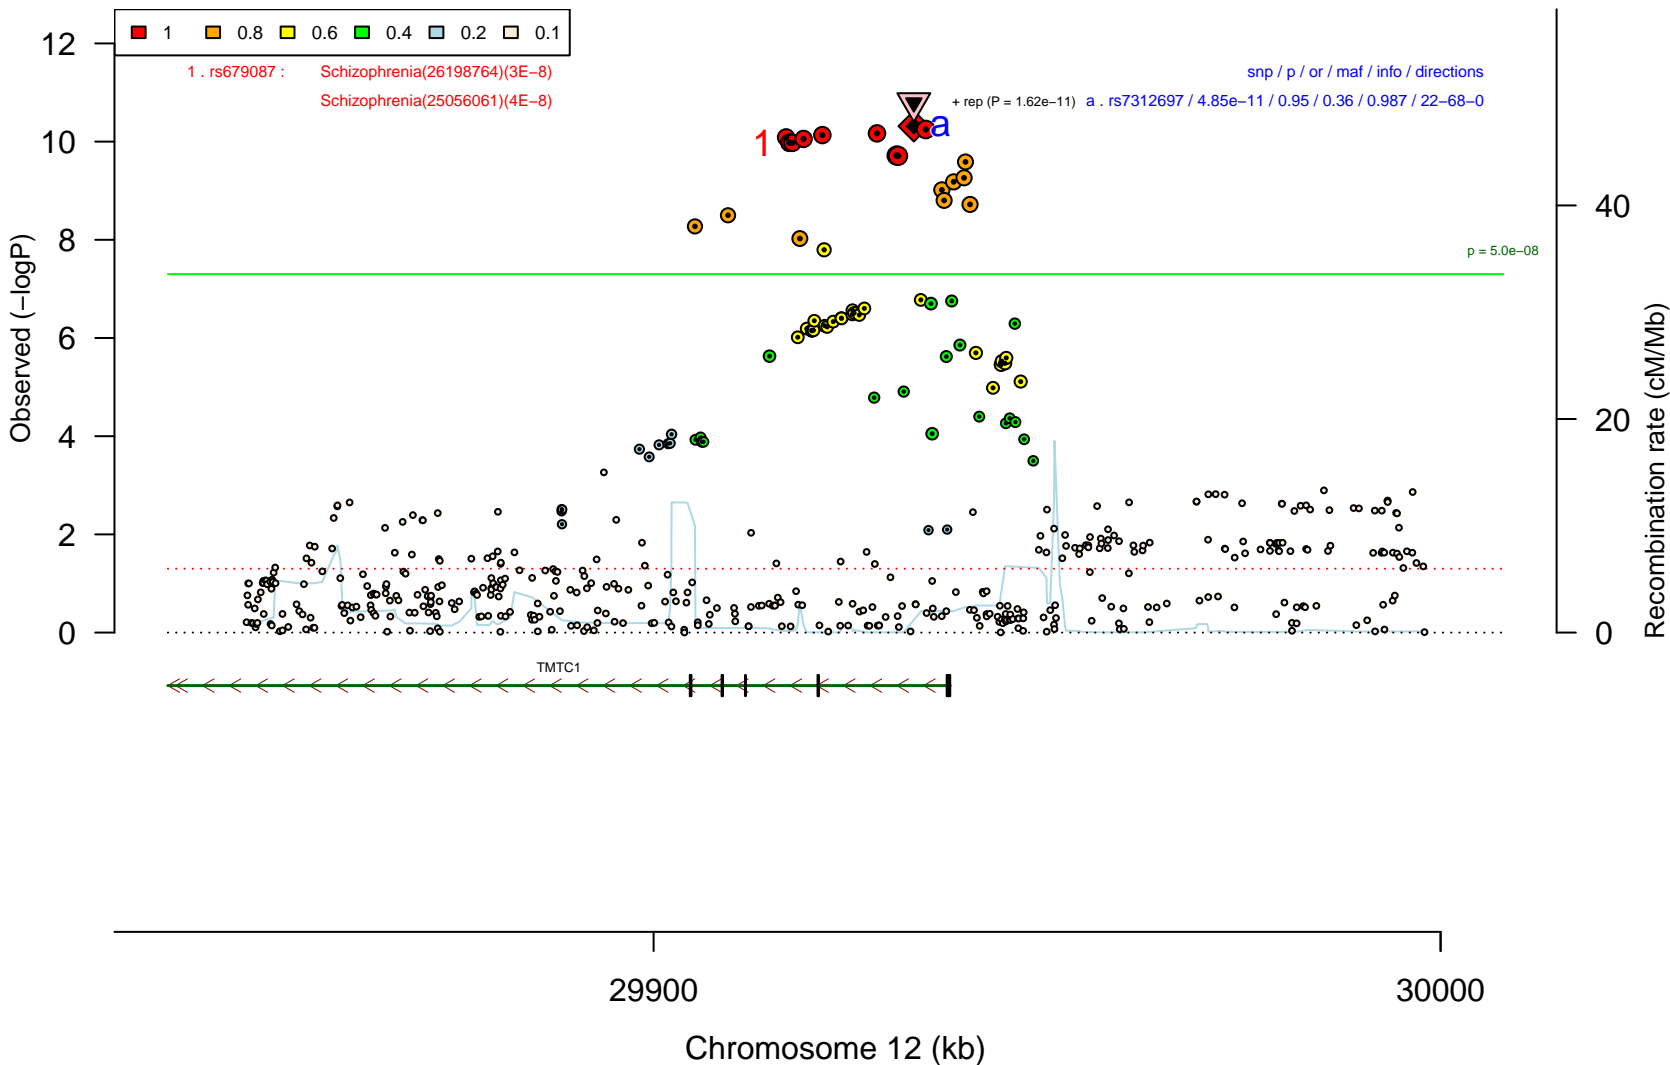

# PGC\_SCZ\_w3\_90\_0418b.151.chr9

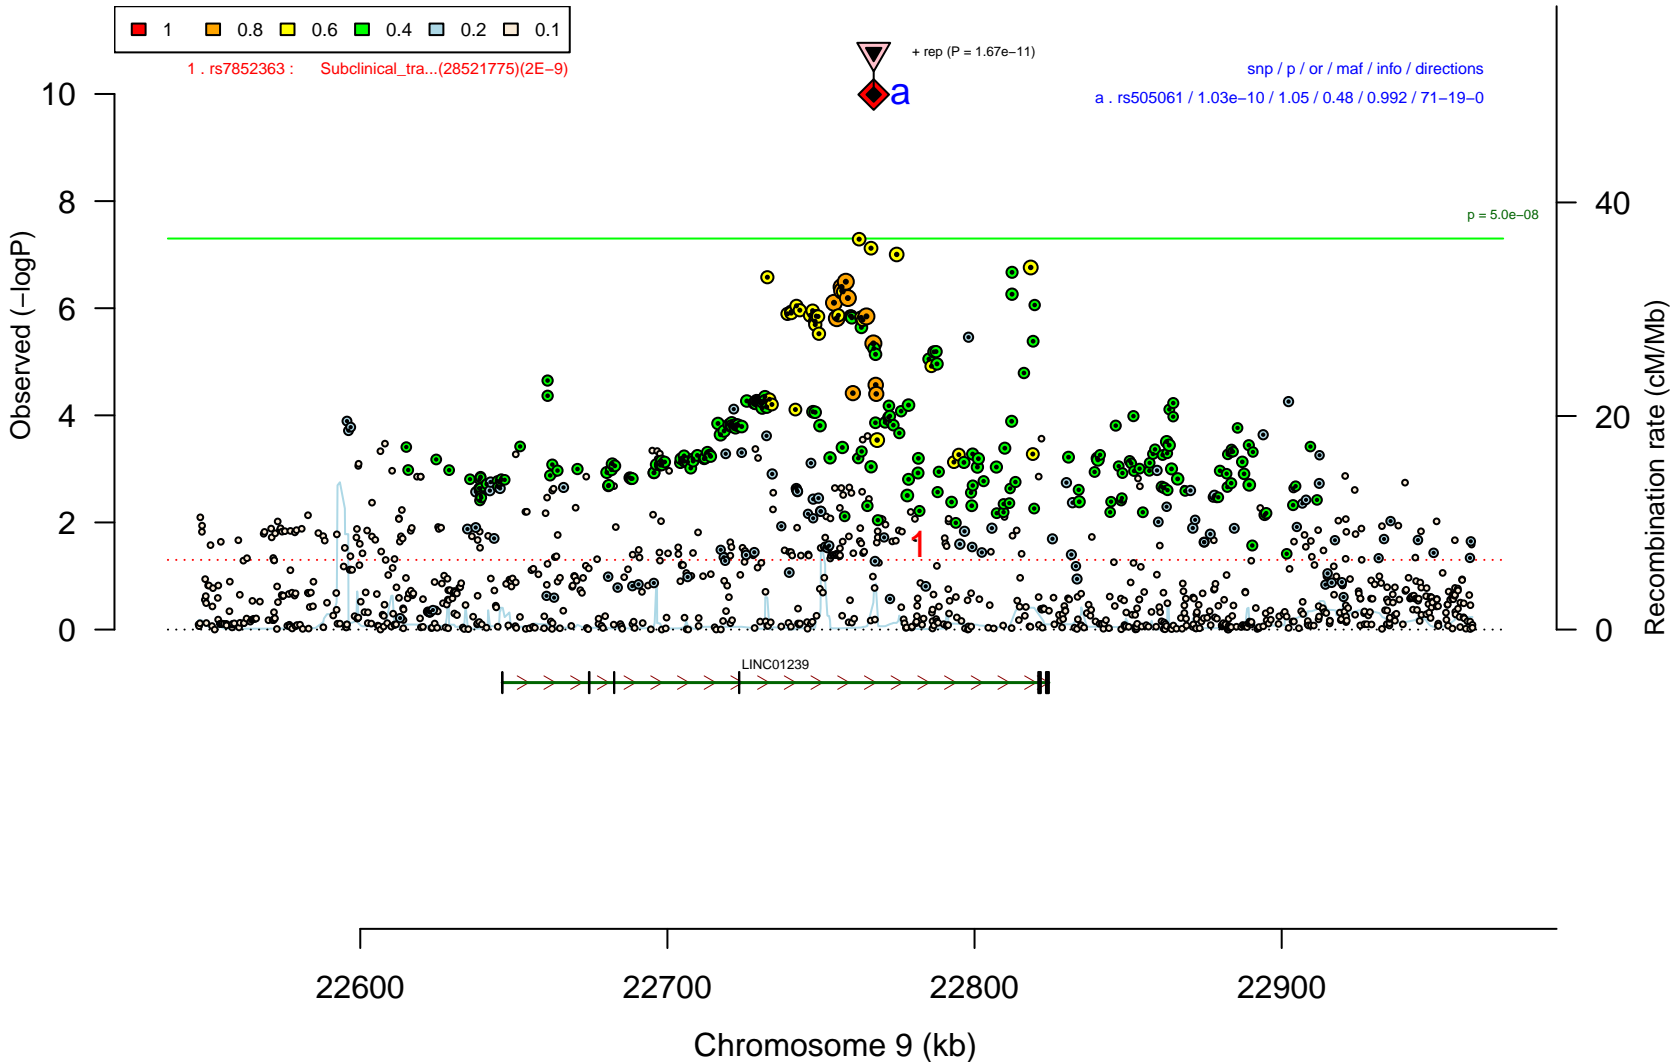

# PGC\_SCZ\_w3\_90\_0418b.30.chr2

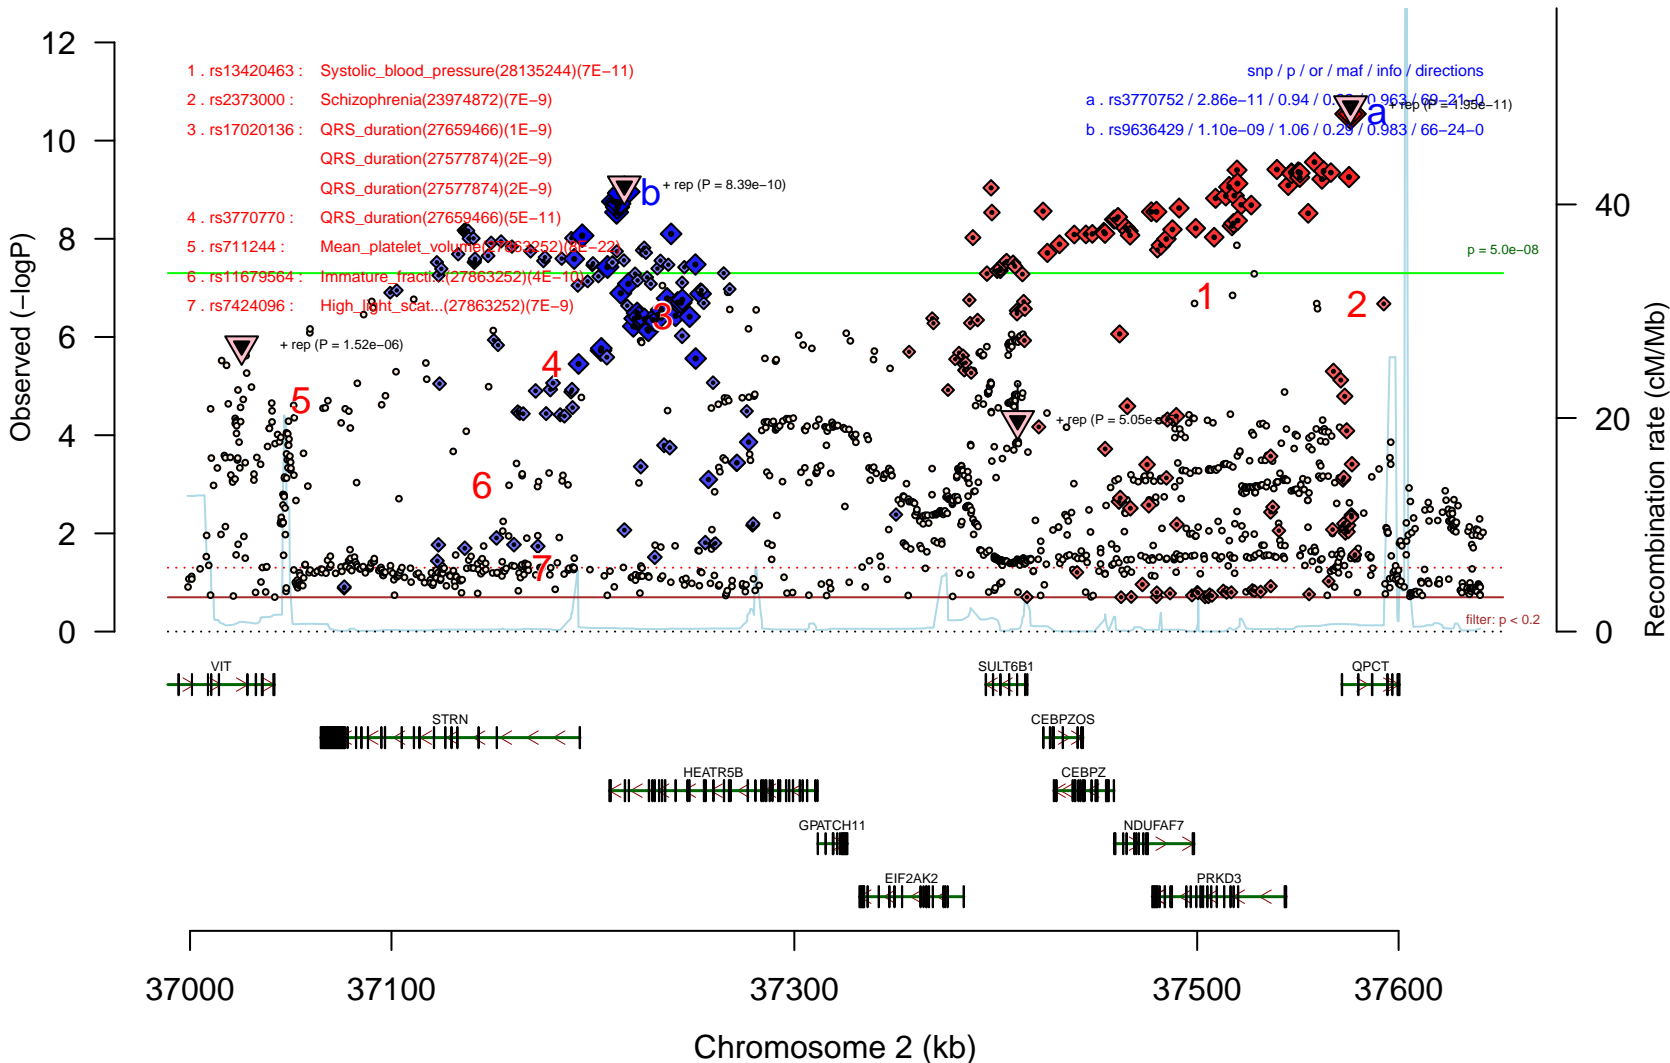



# PGC\_SCZ\_w3\_90\_0418b.78.chr4

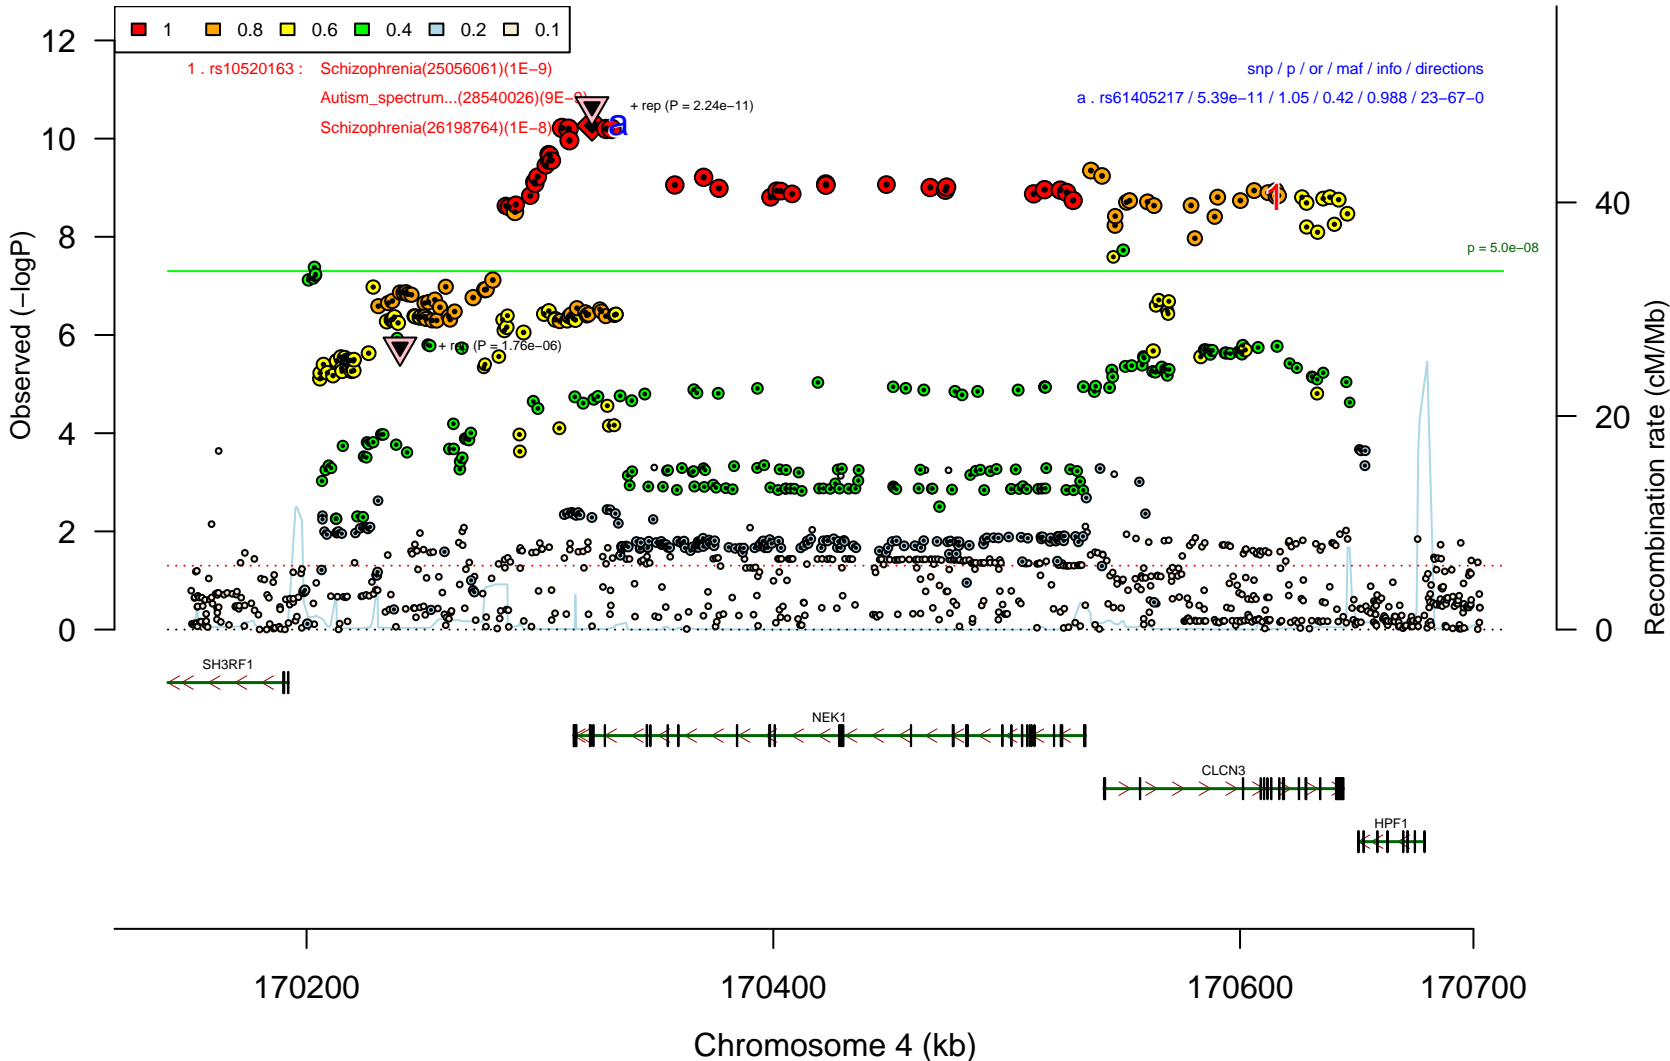

# PGC\_SCZ\_w3\_90\_0418b.175.chr11

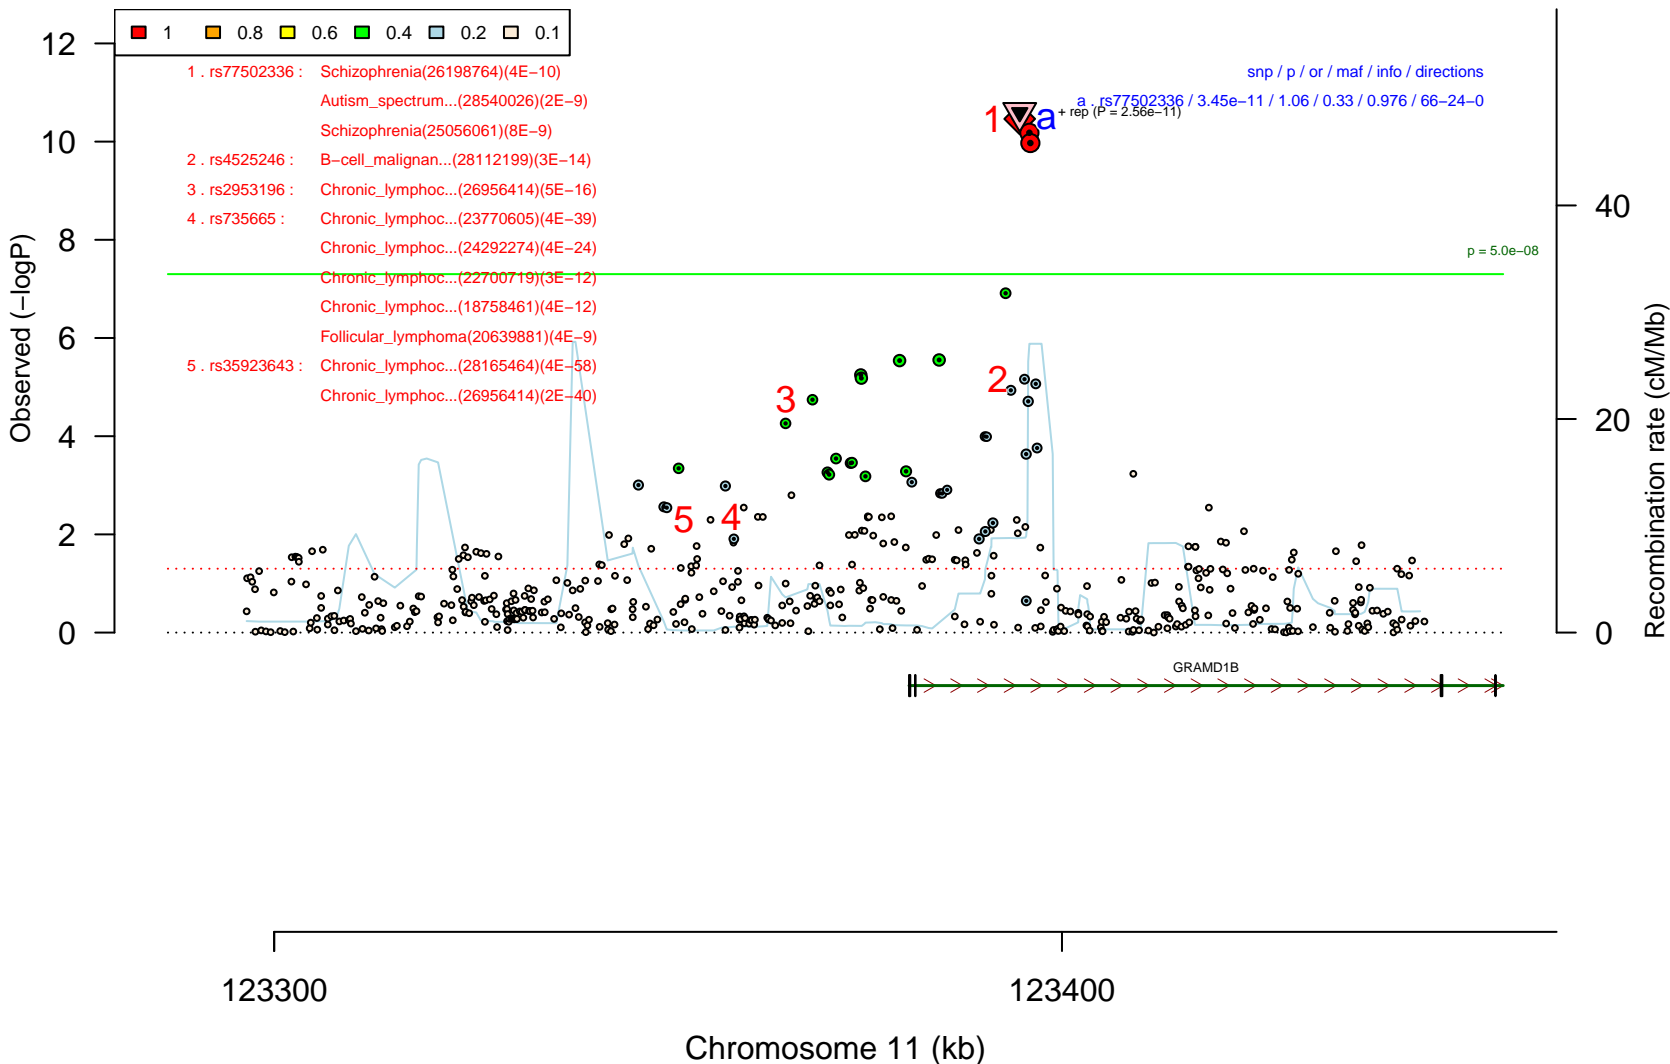

# PGC\_SCZ\_w3\_90\_0418b.206.chr13

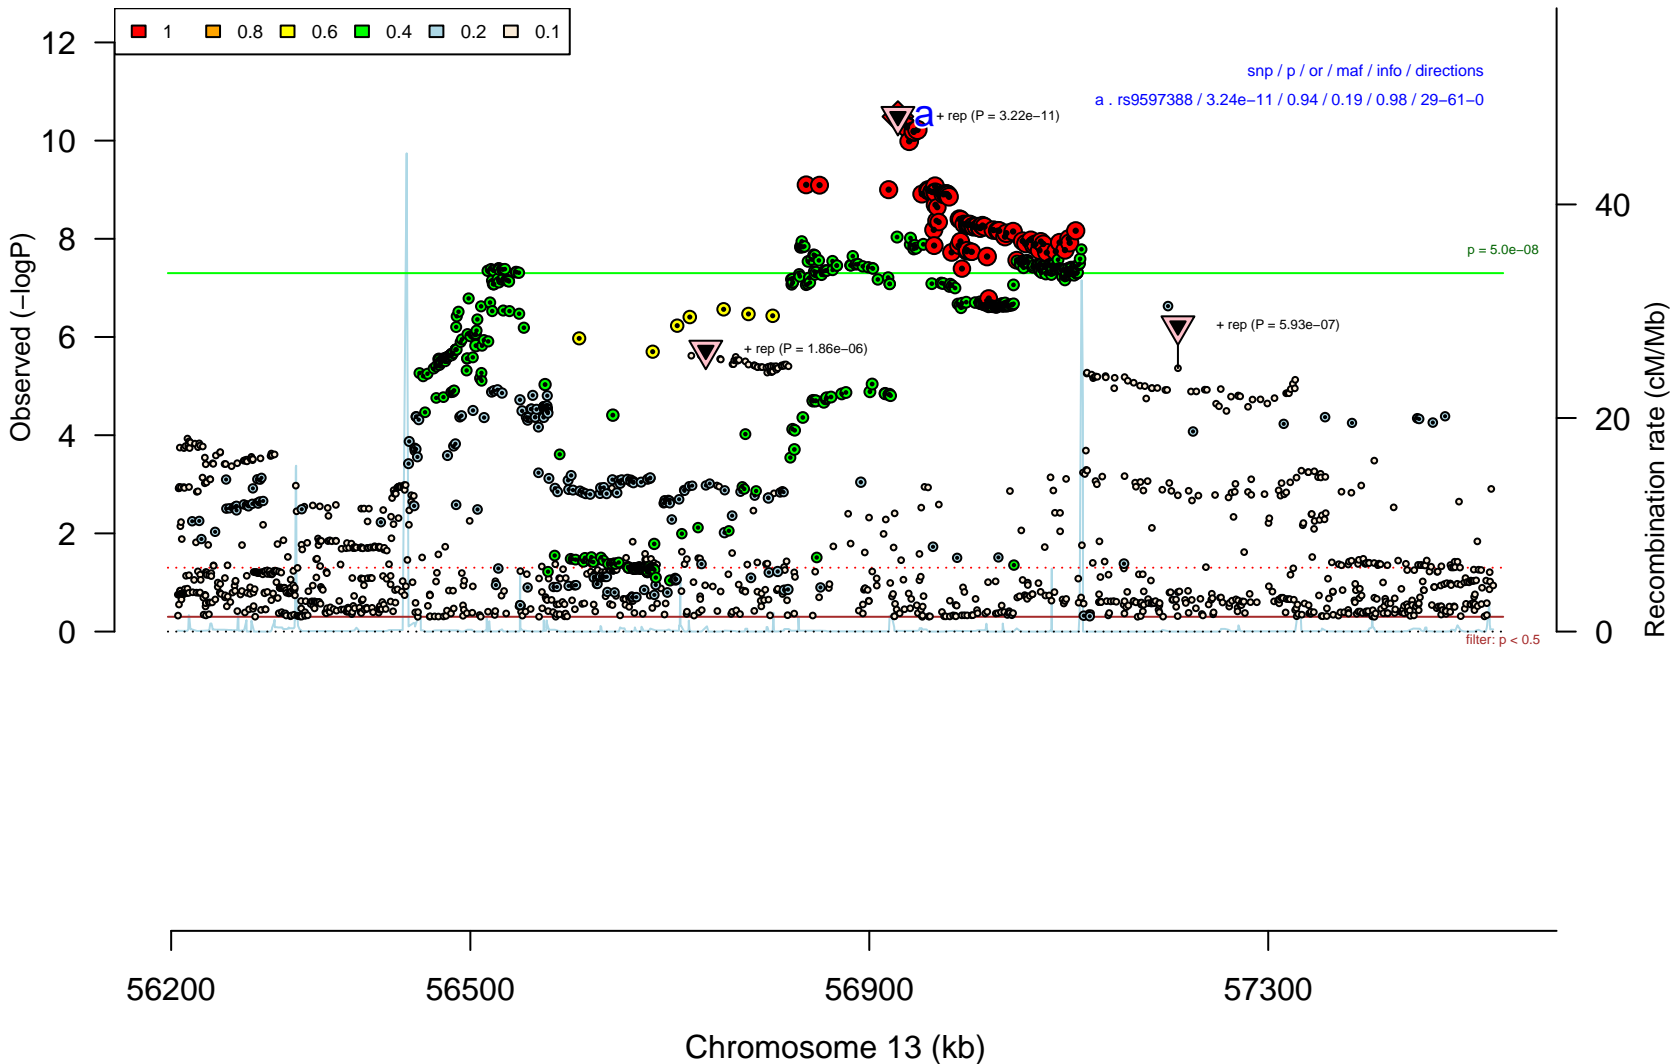

# PGC\_SCZ\_w3\_90\_0418b.38.chr2

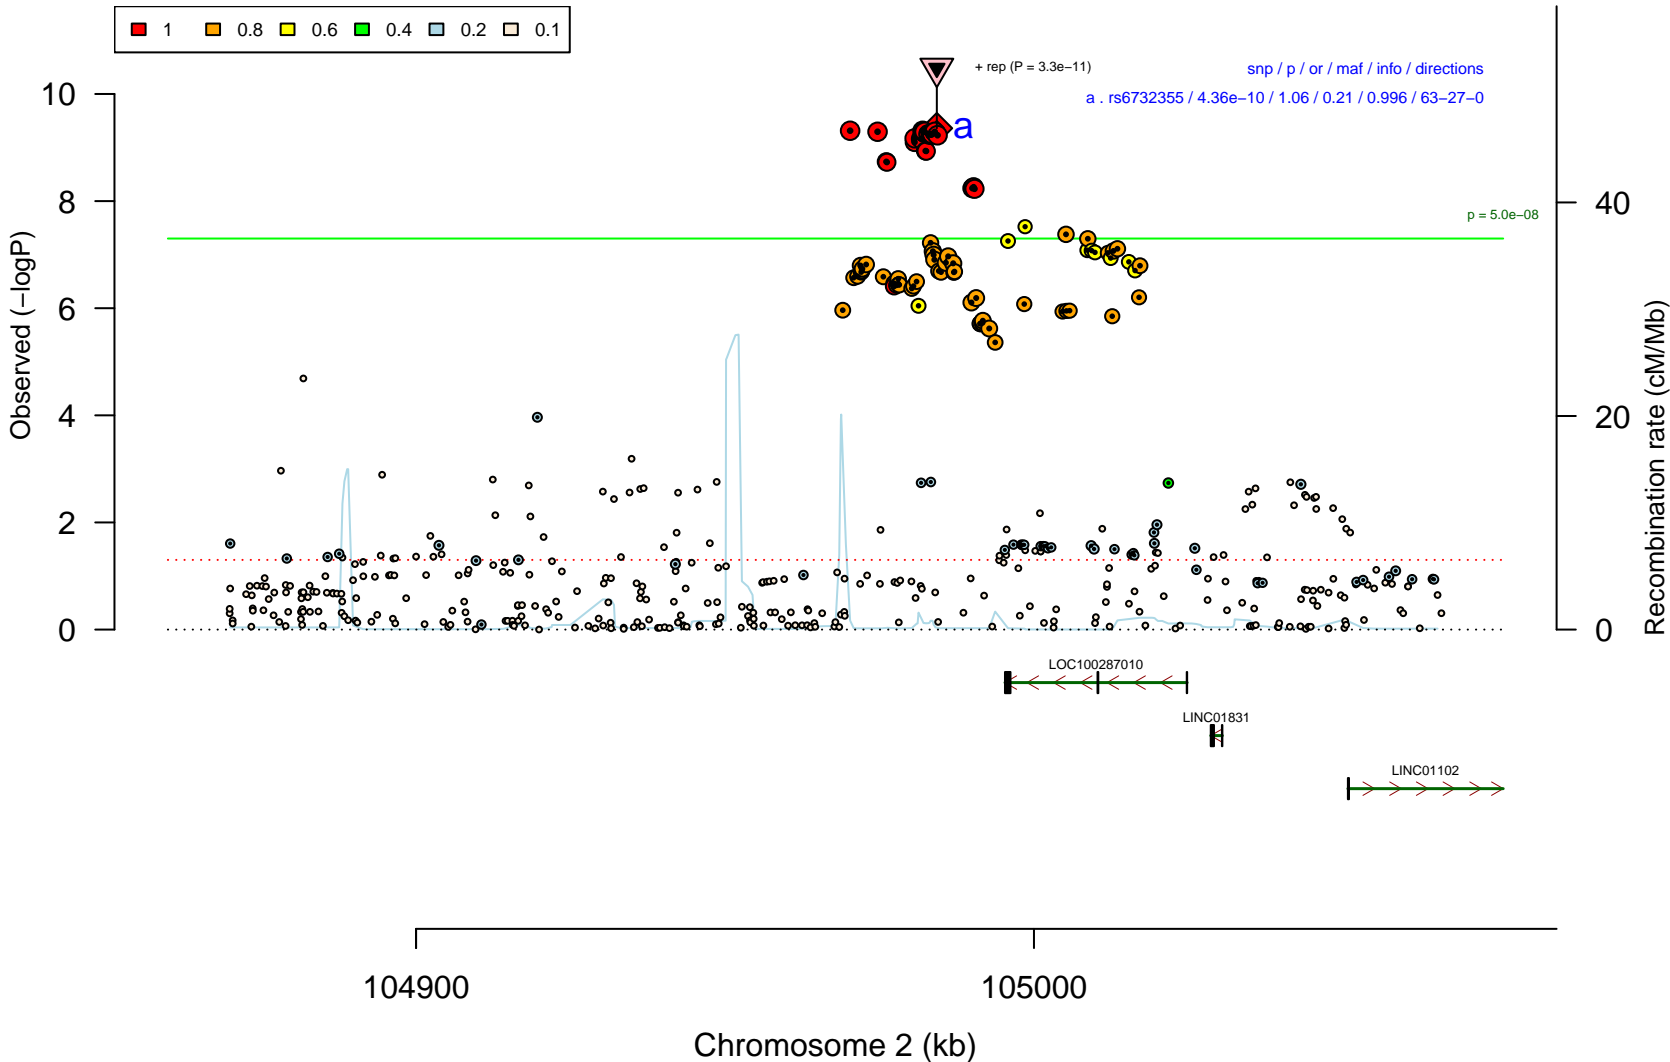

# PGC\_SCZ\_w3\_90\_0418b.181.chr11

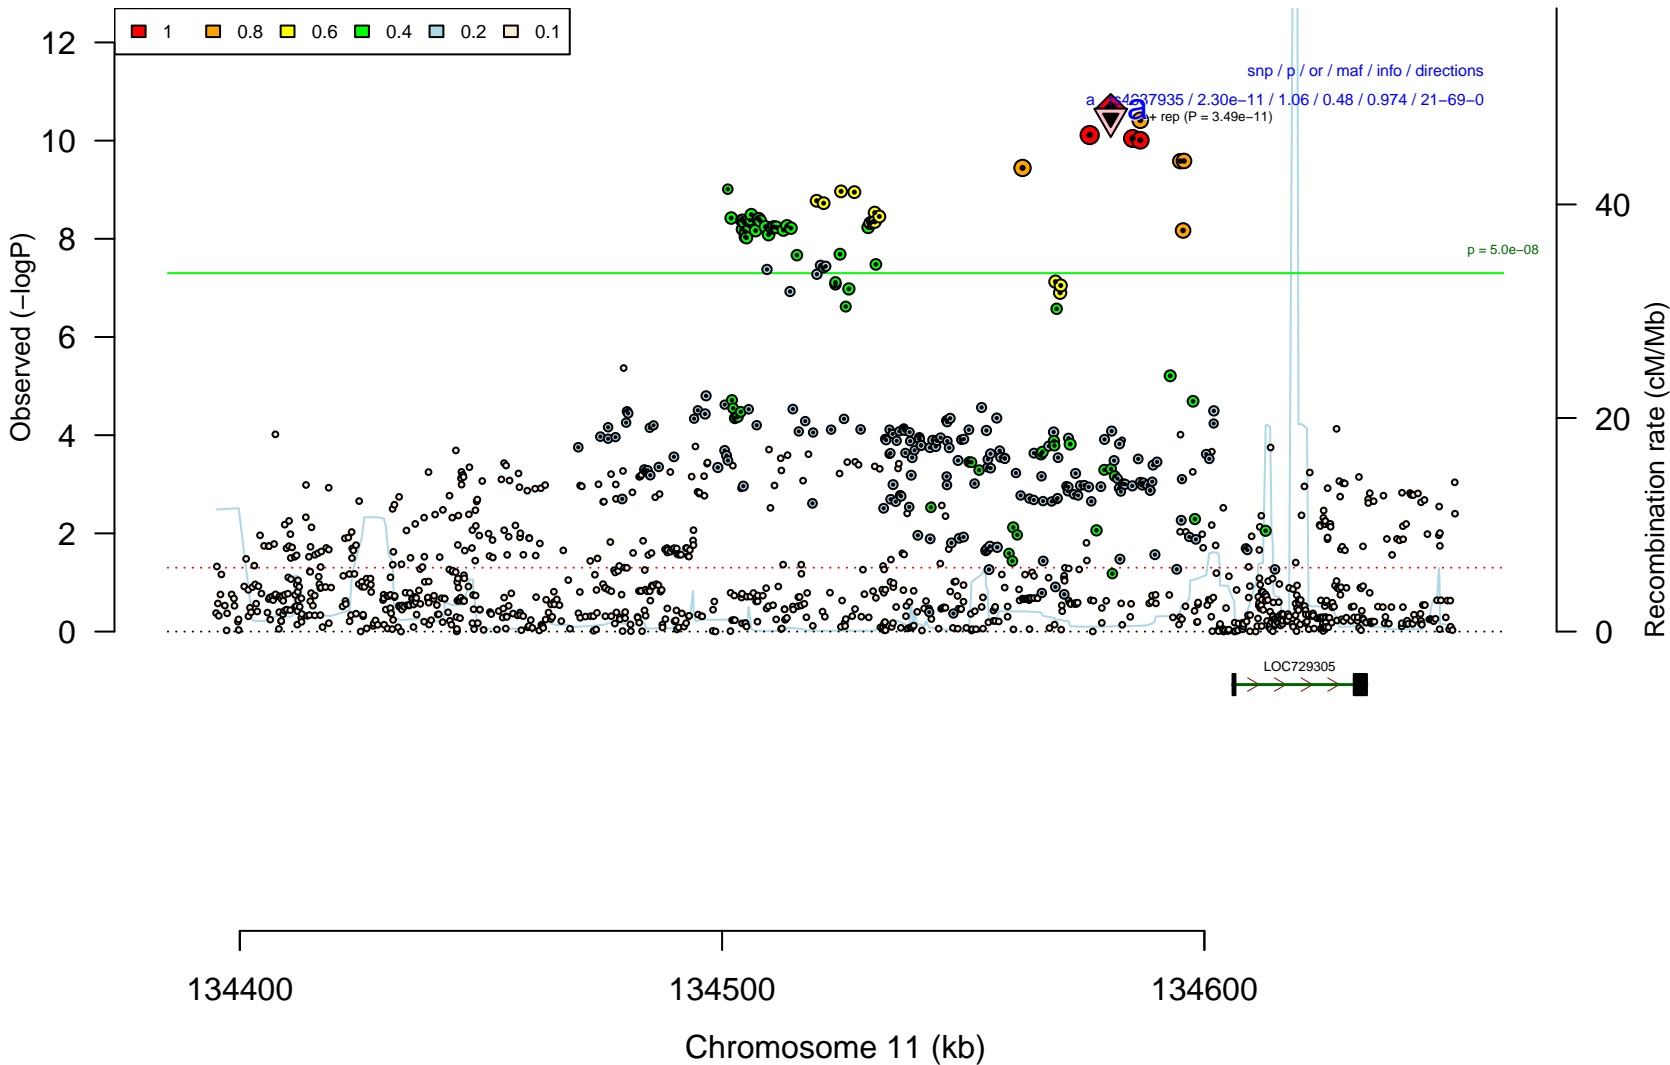

# PGC\_SCZ\_w3\_90\_0418b.241.chr17

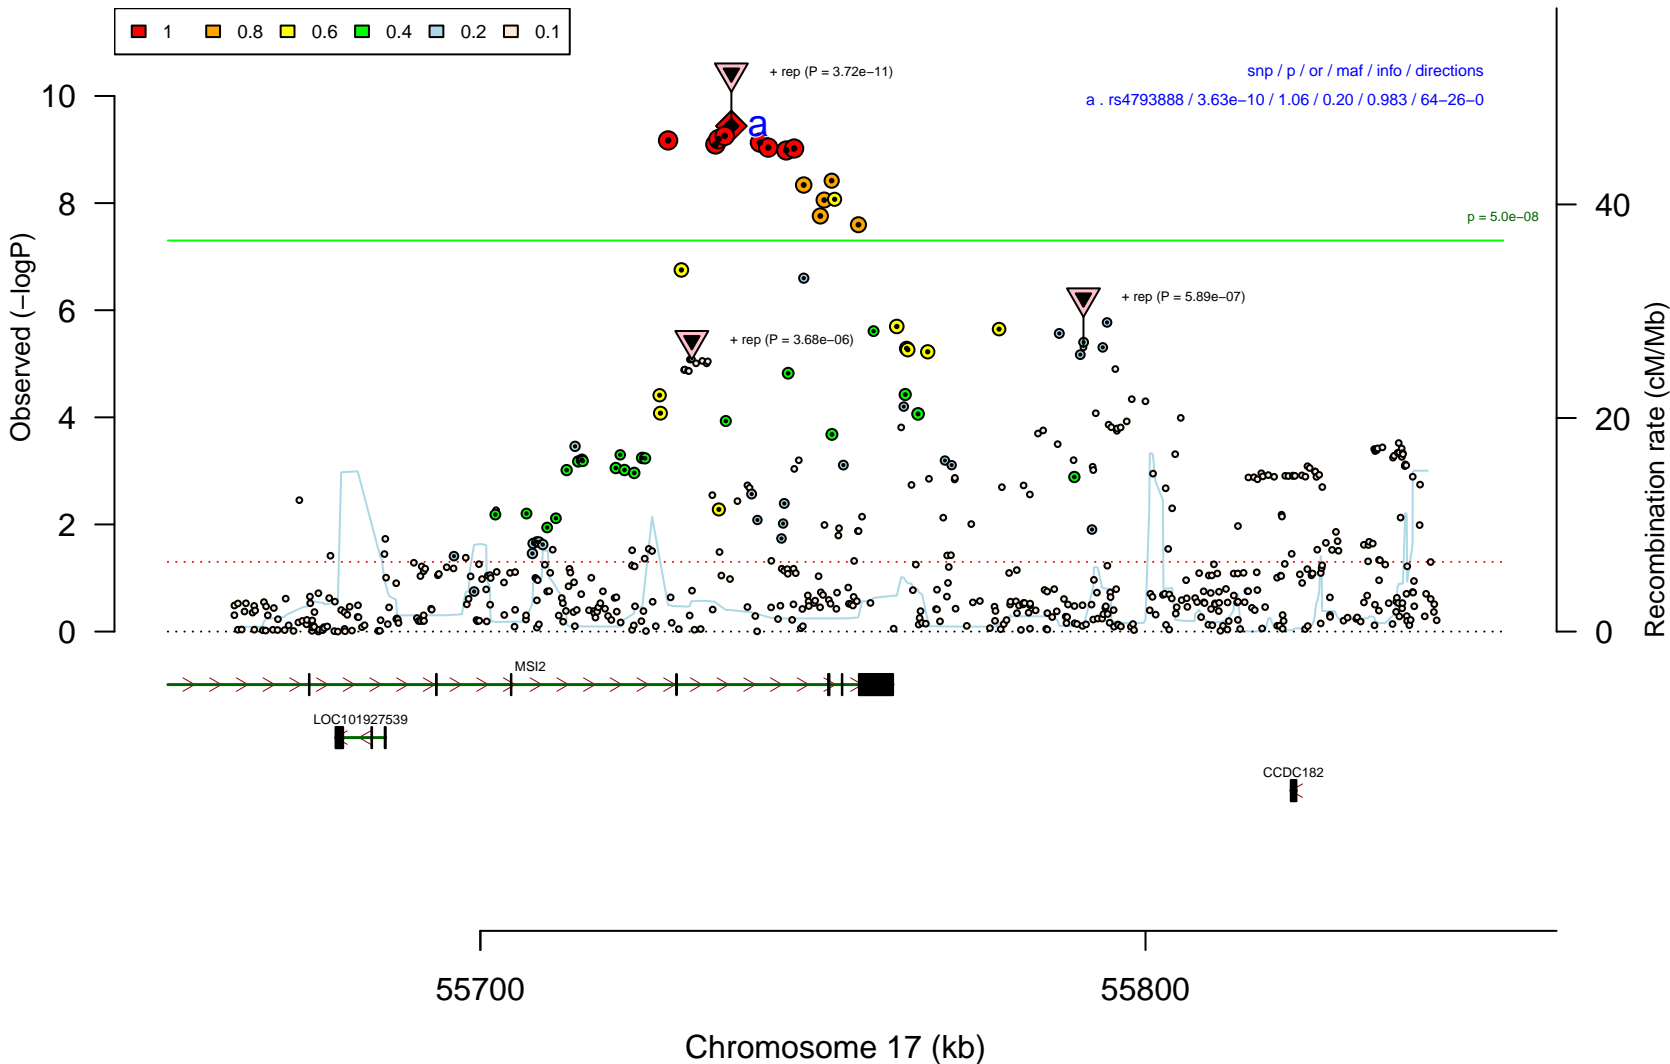

# PGC\_SCZ\_w3\_90\_0418b.91.chr5

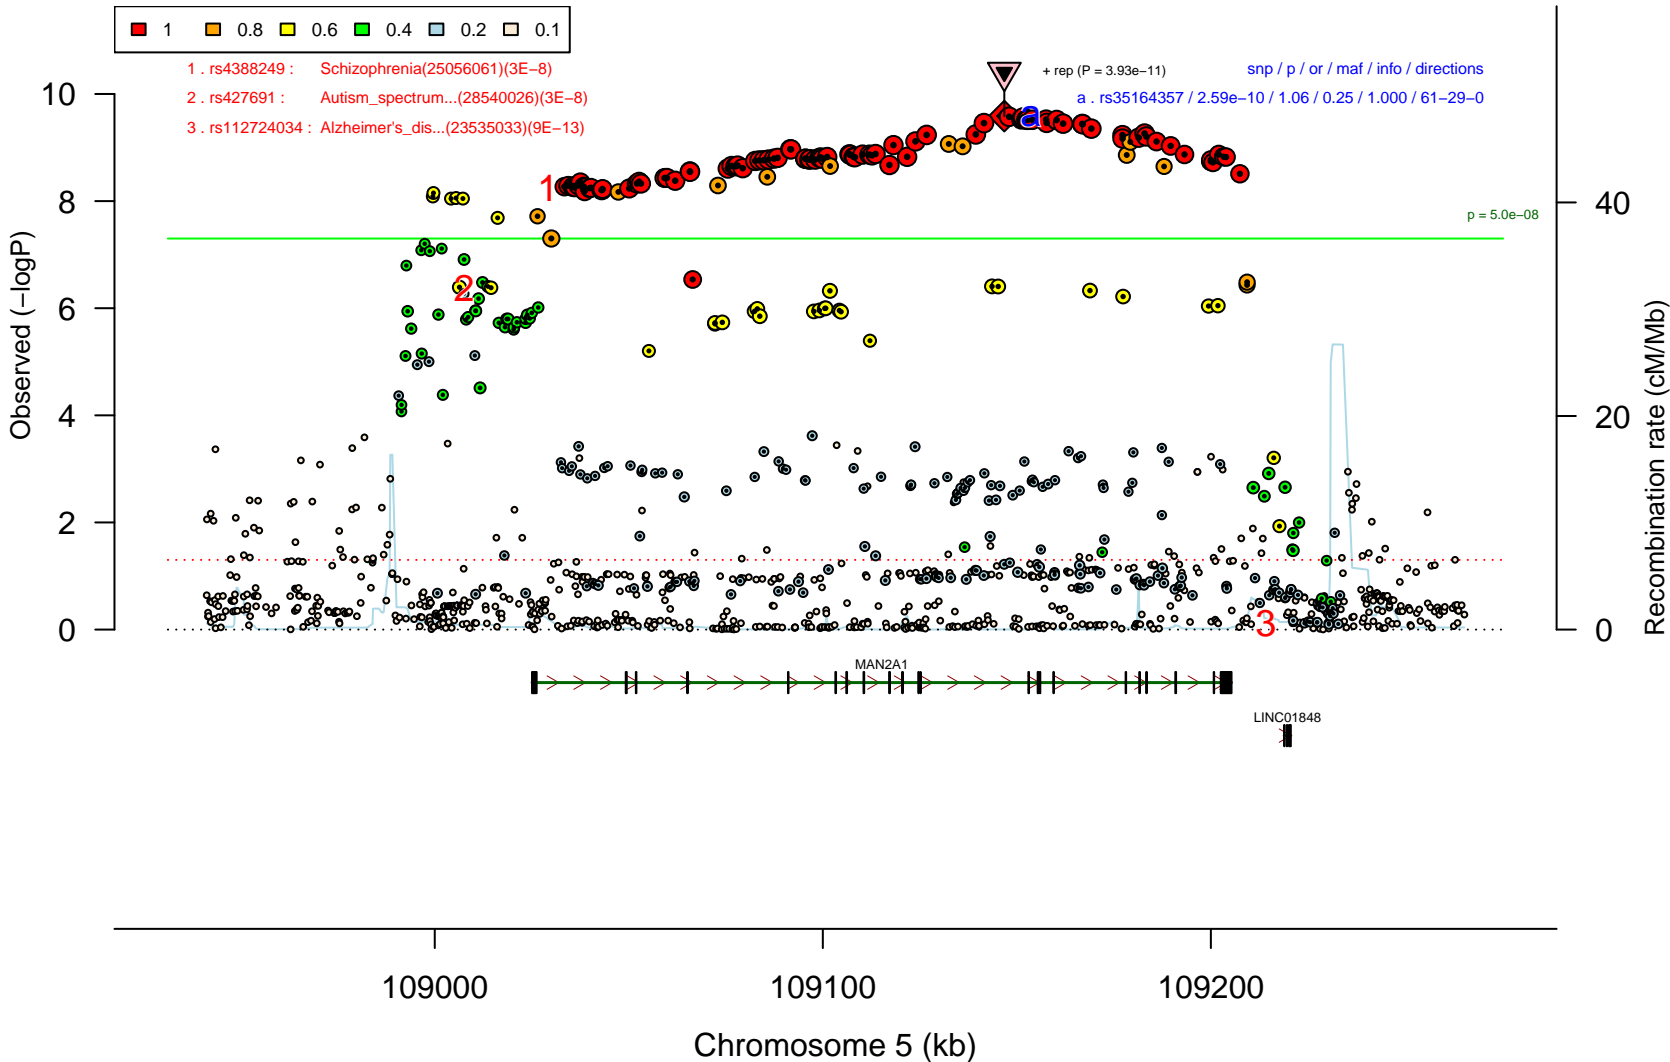

**PGC\_SCZ\_w3\_90\_0418b.146.chr8**

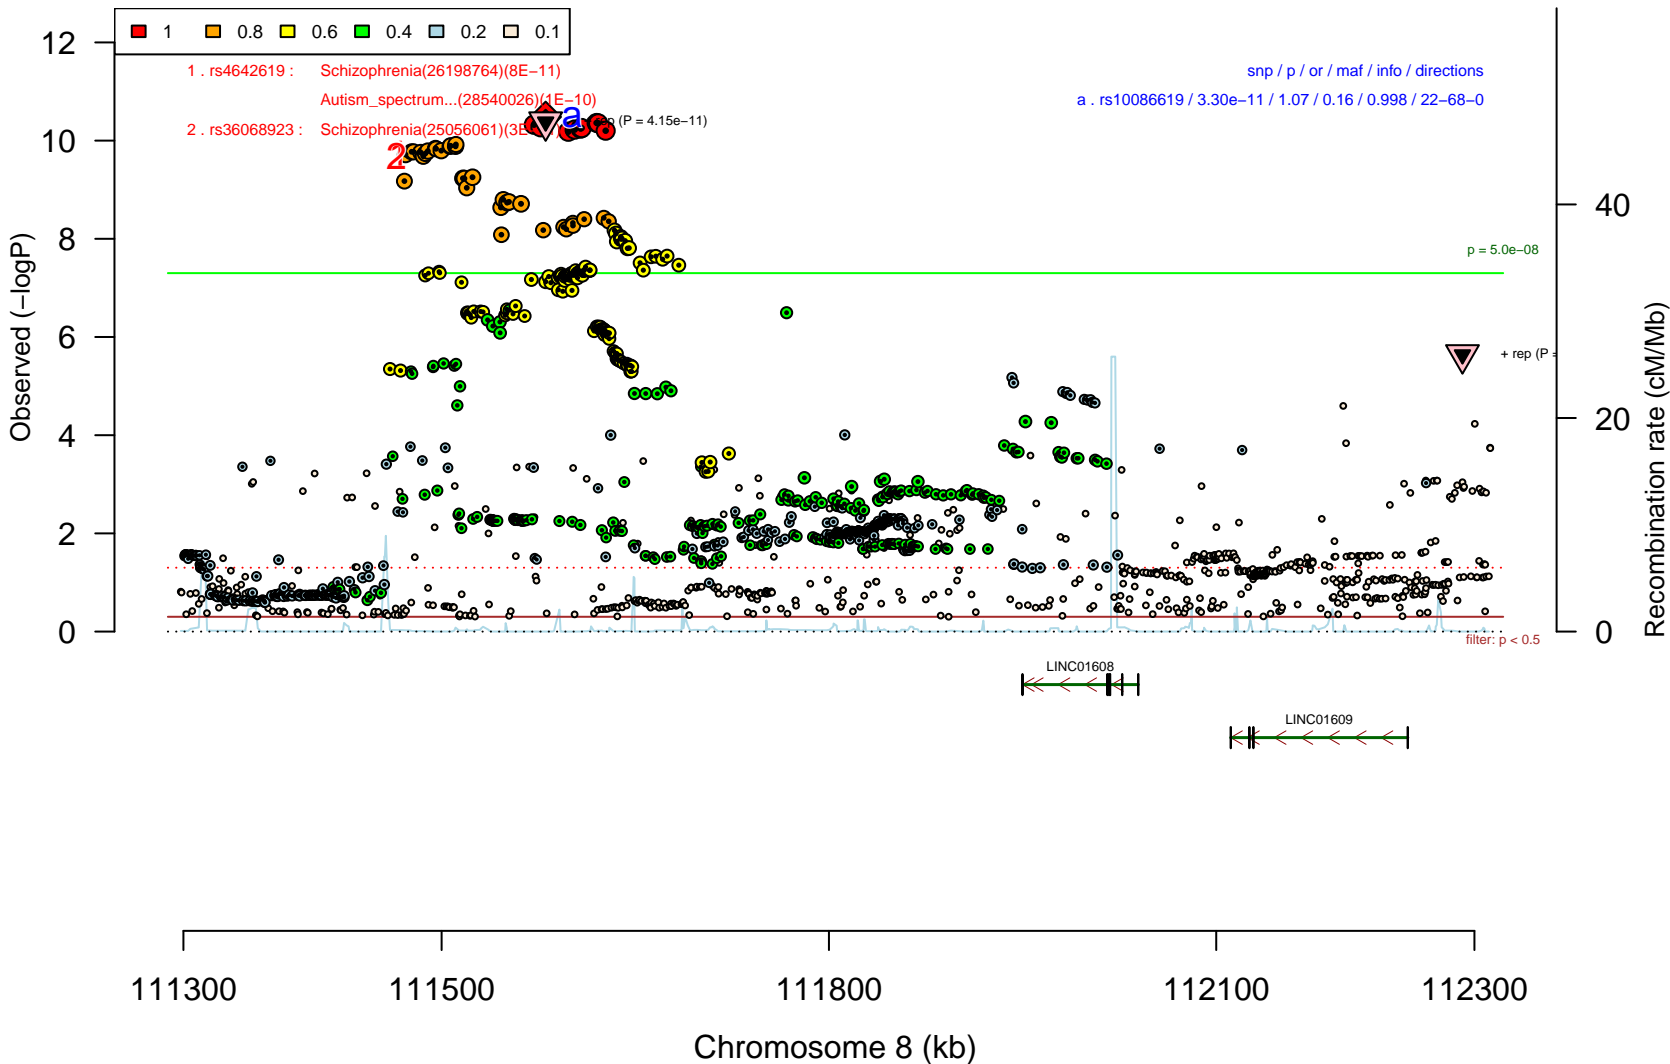



# PGC\_SCZ\_w3\_90\_0418b.130.chr7

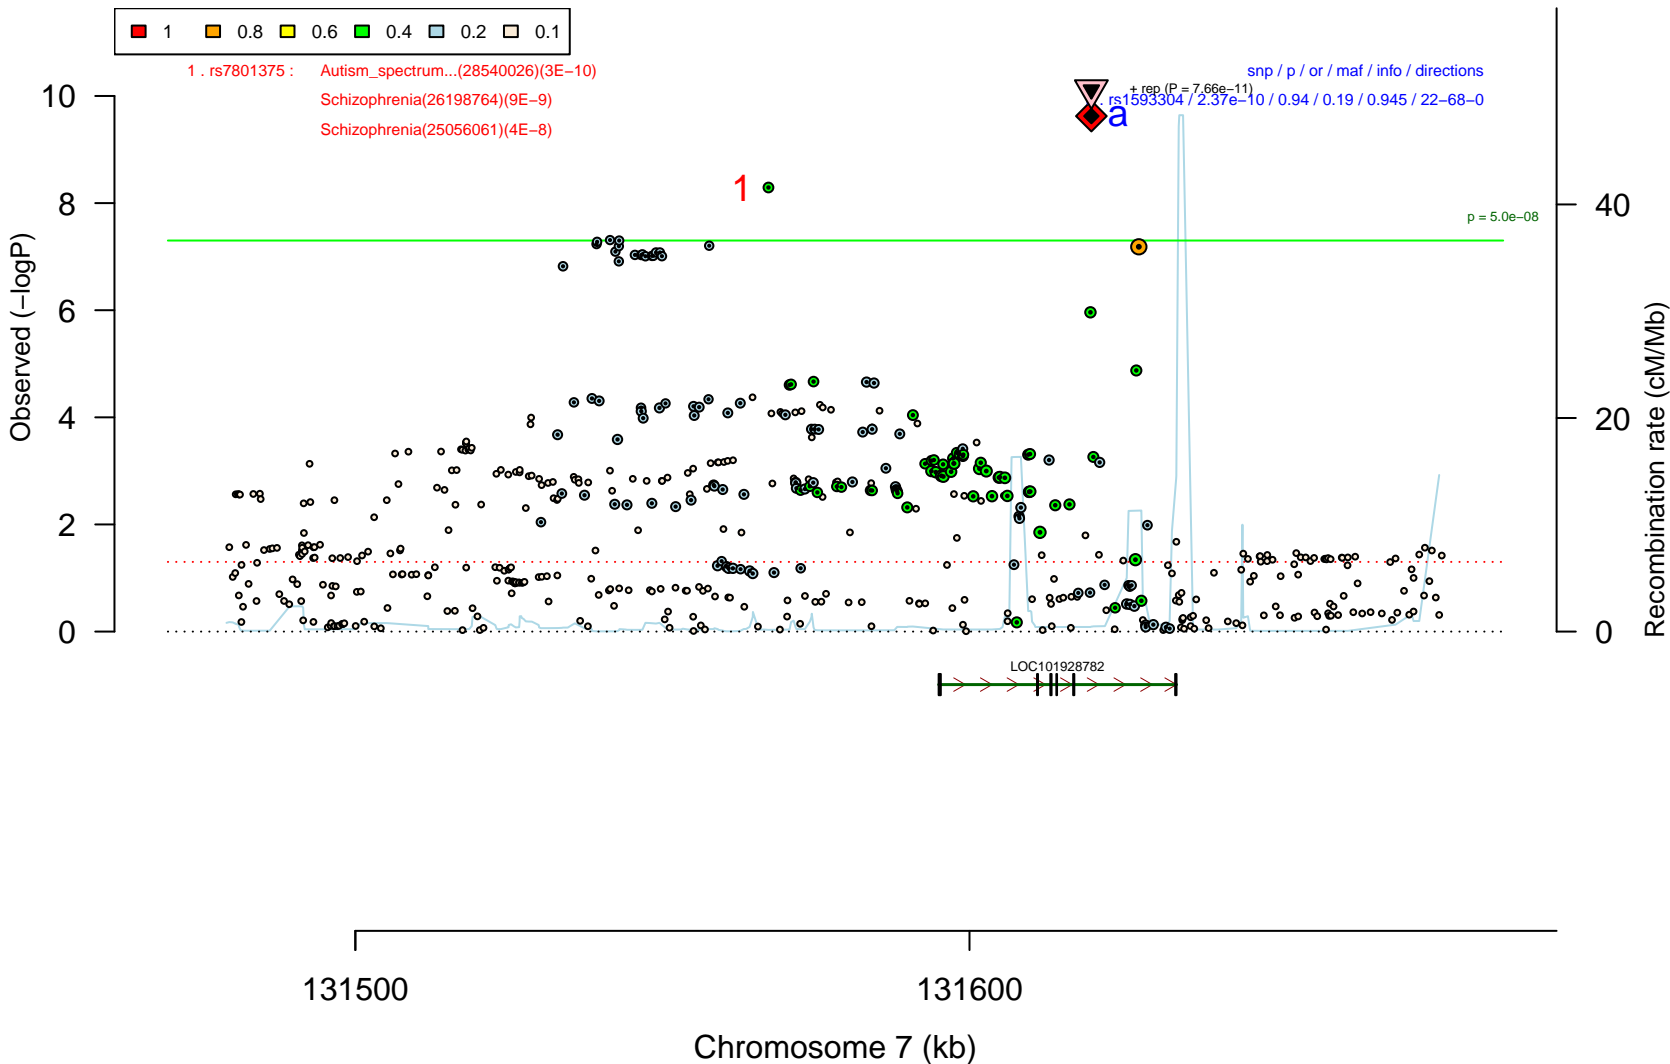

# PGC\_SCZ\_w3\_90\_0418b.225.chr15

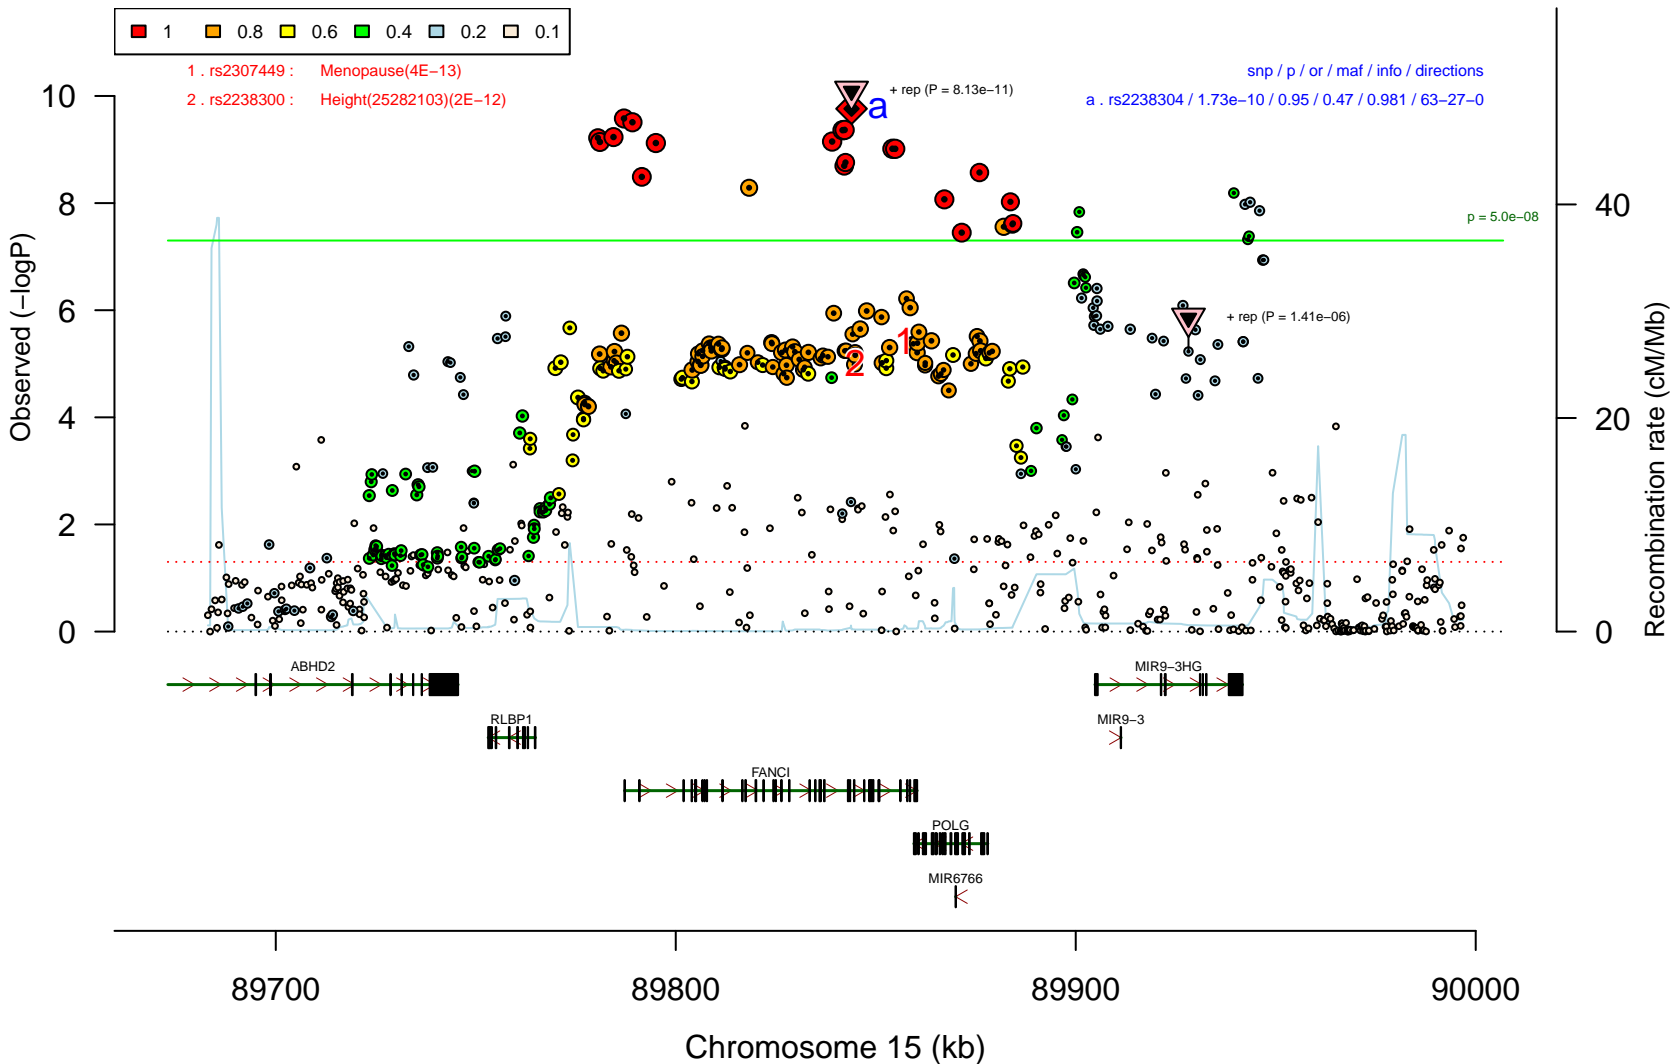

# PGC\_SCZ\_w3\_90\_0418b.240.chr17

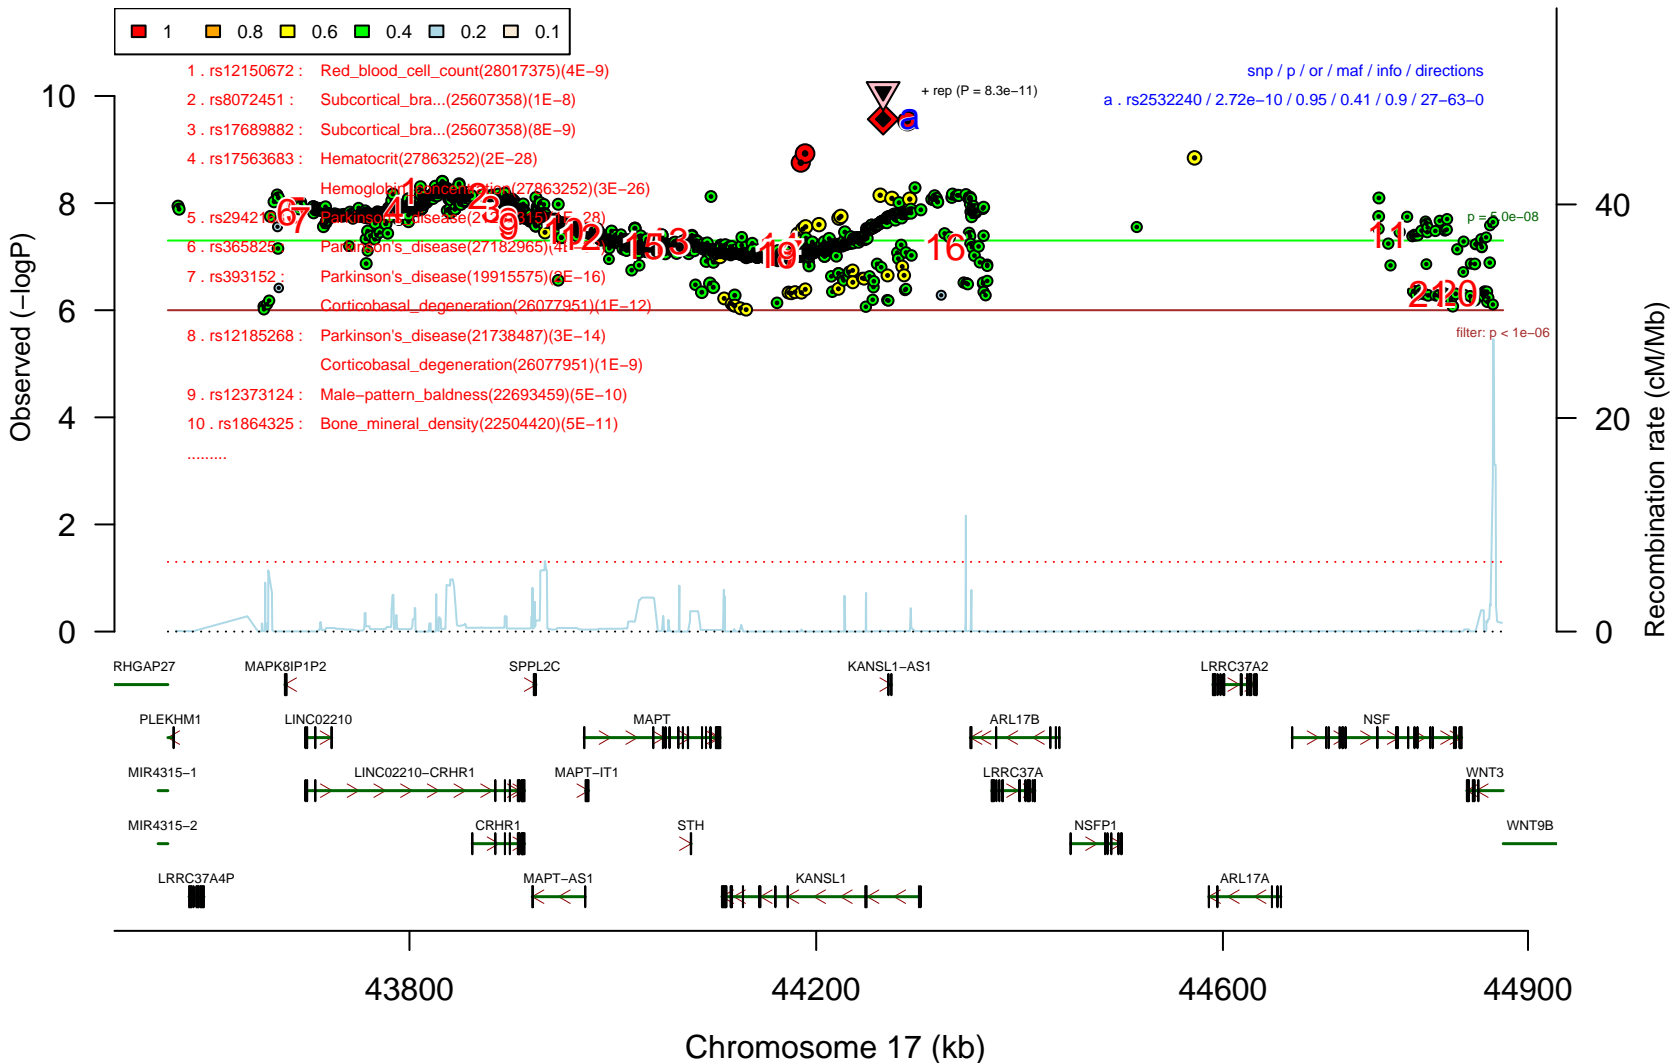

# PGC\_SCZ\_w3\_90\_0418b.53.chr3

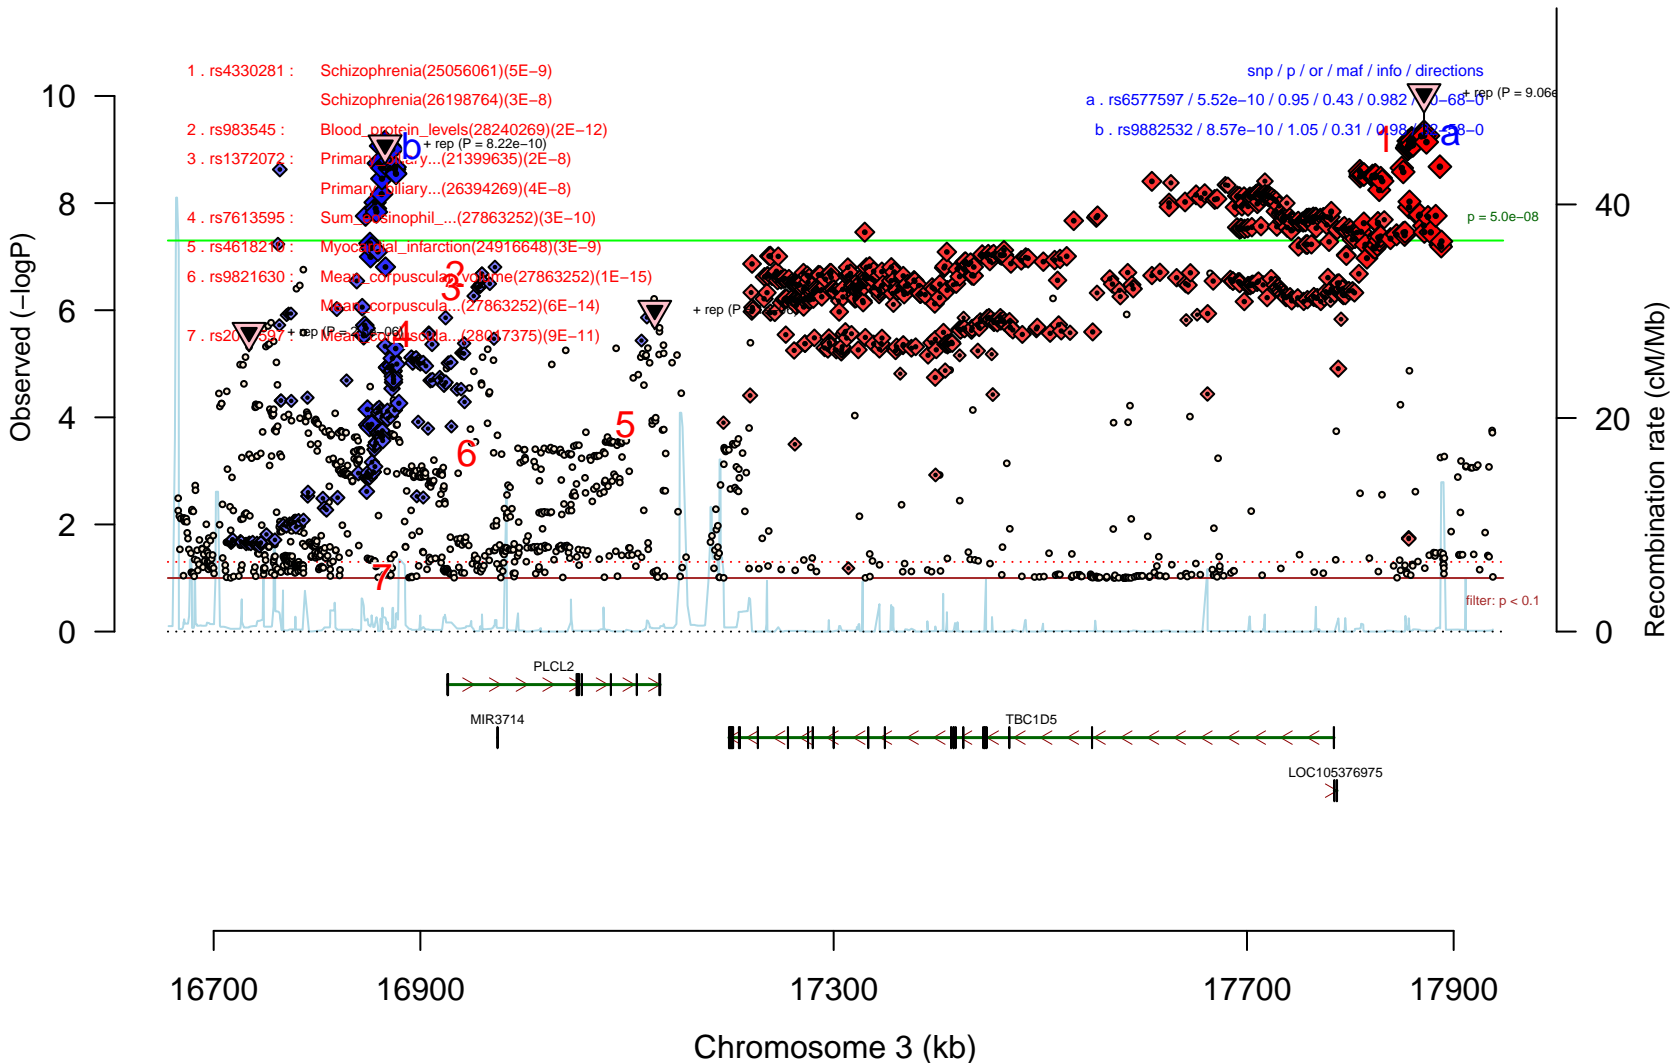

# PGC\_SCZ\_w3\_90\_0418b.171.chr11

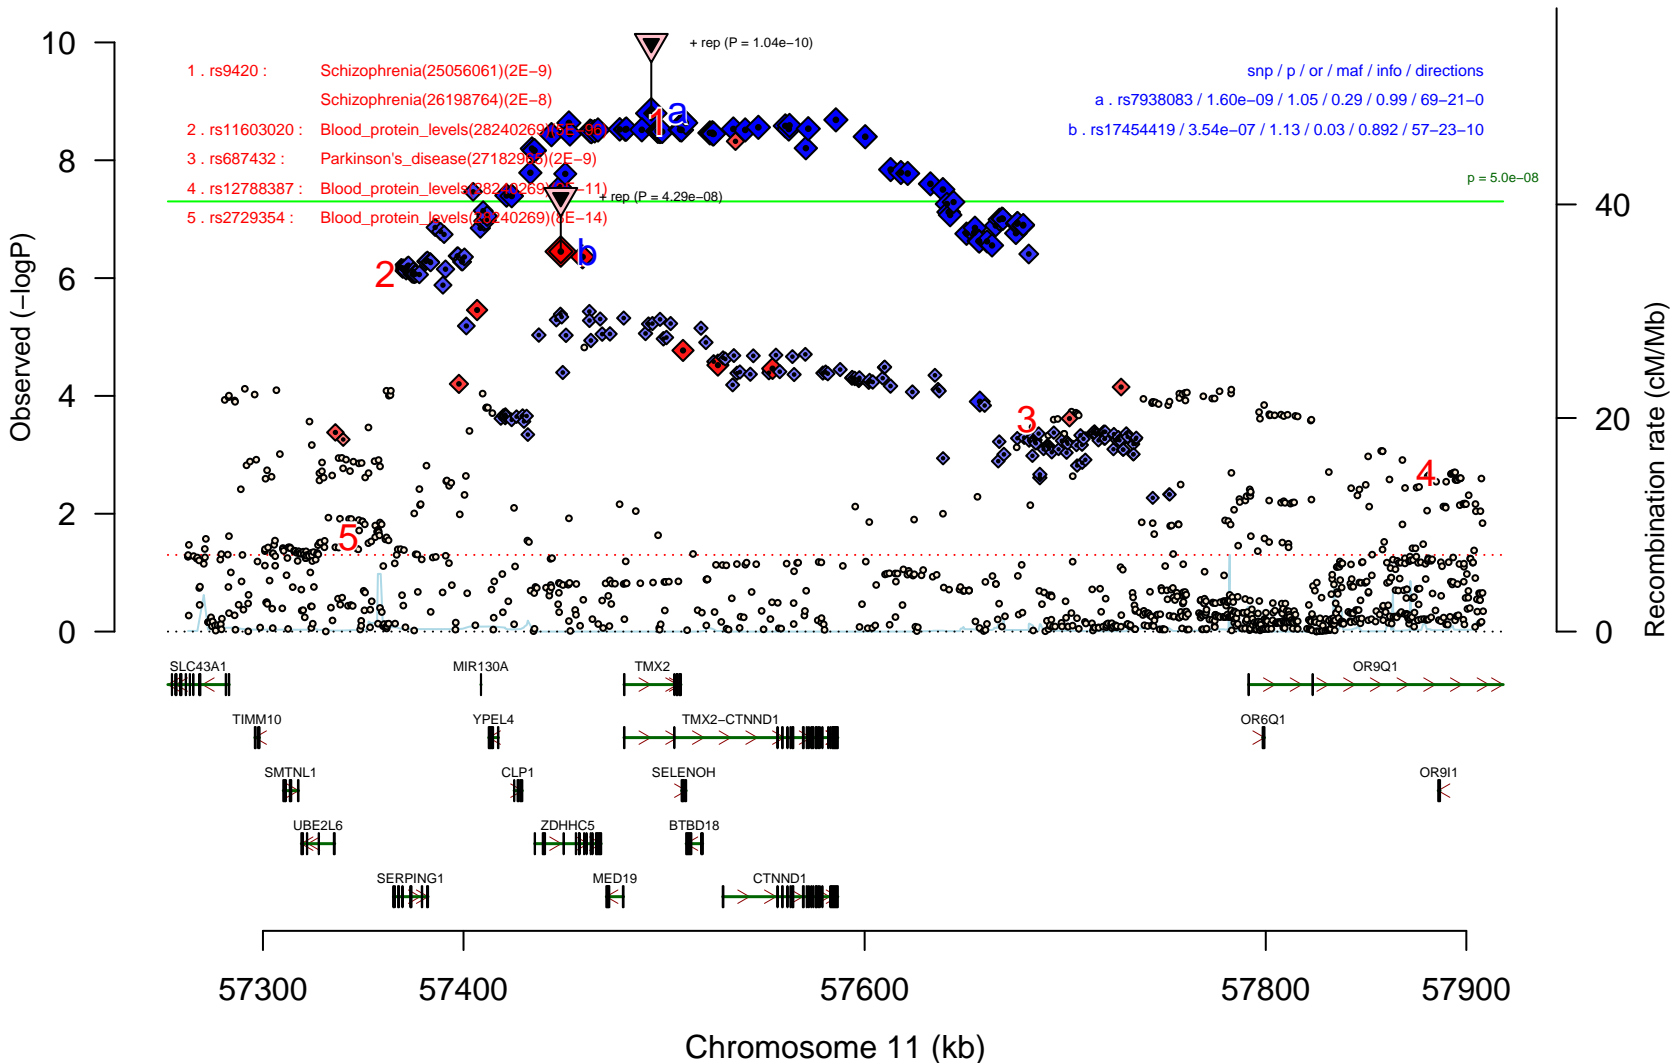

# PGC\_SCZ\_w3\_90\_0418b.107.chr6

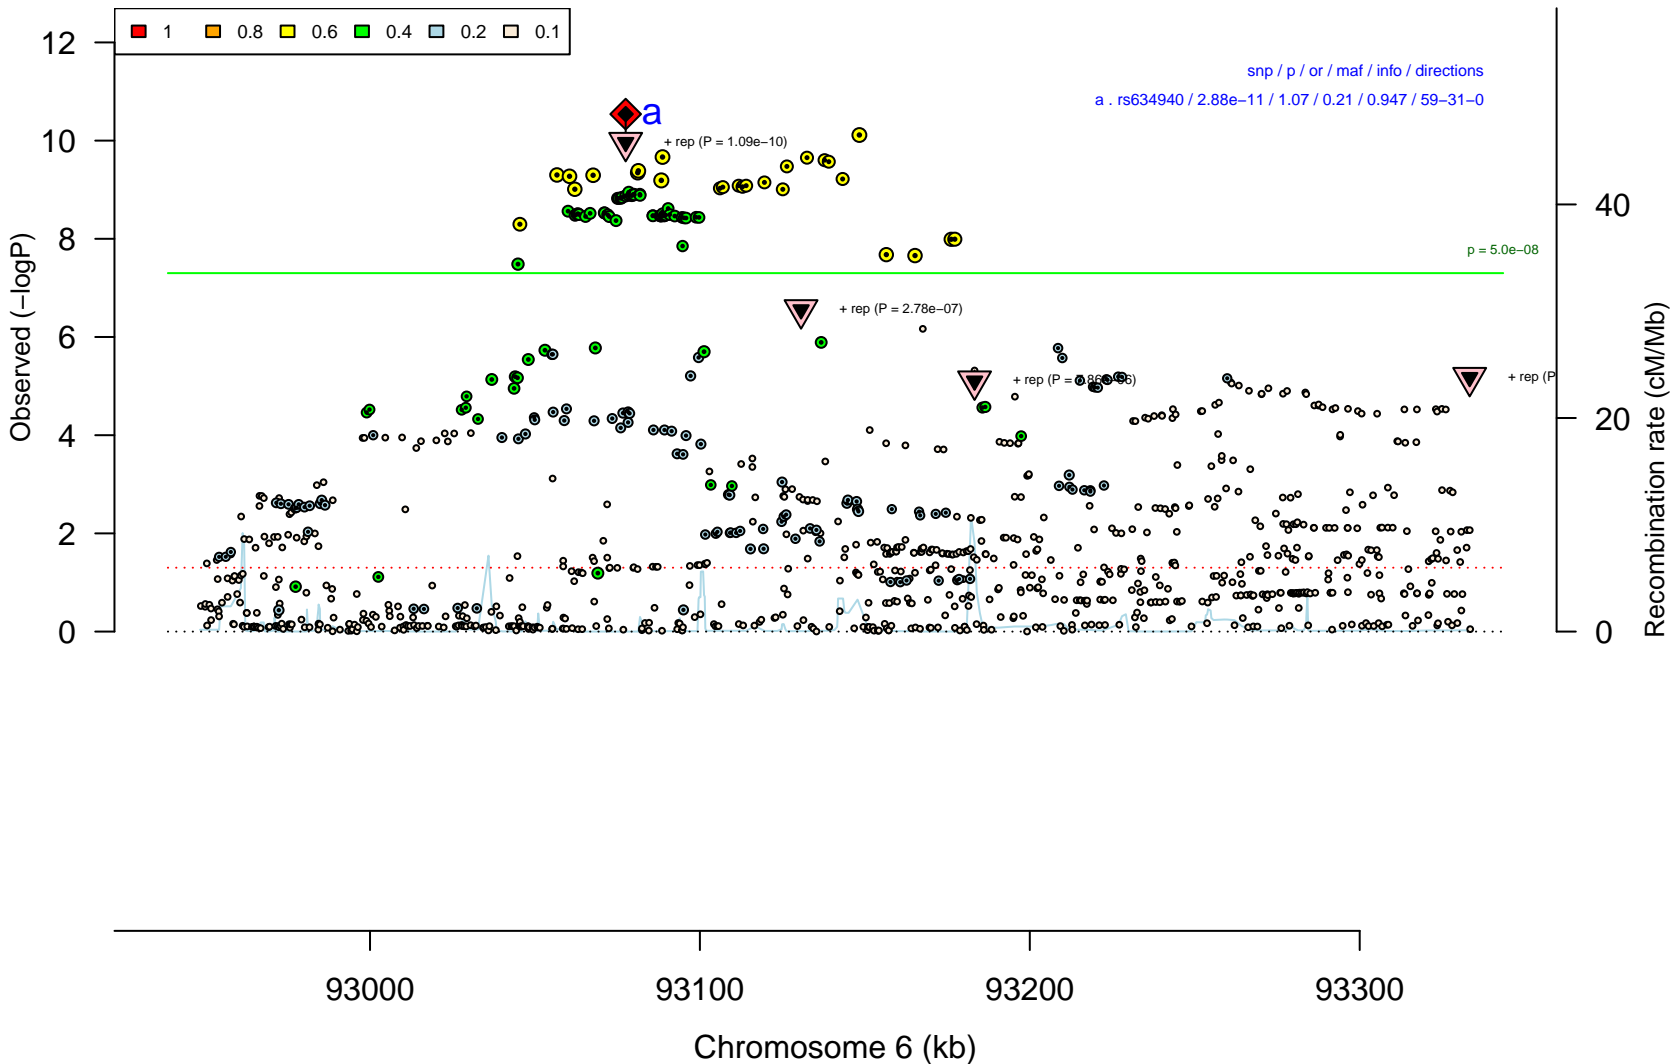

# PGC\_SCZ\_w3\_90\_0418b.144.chr8

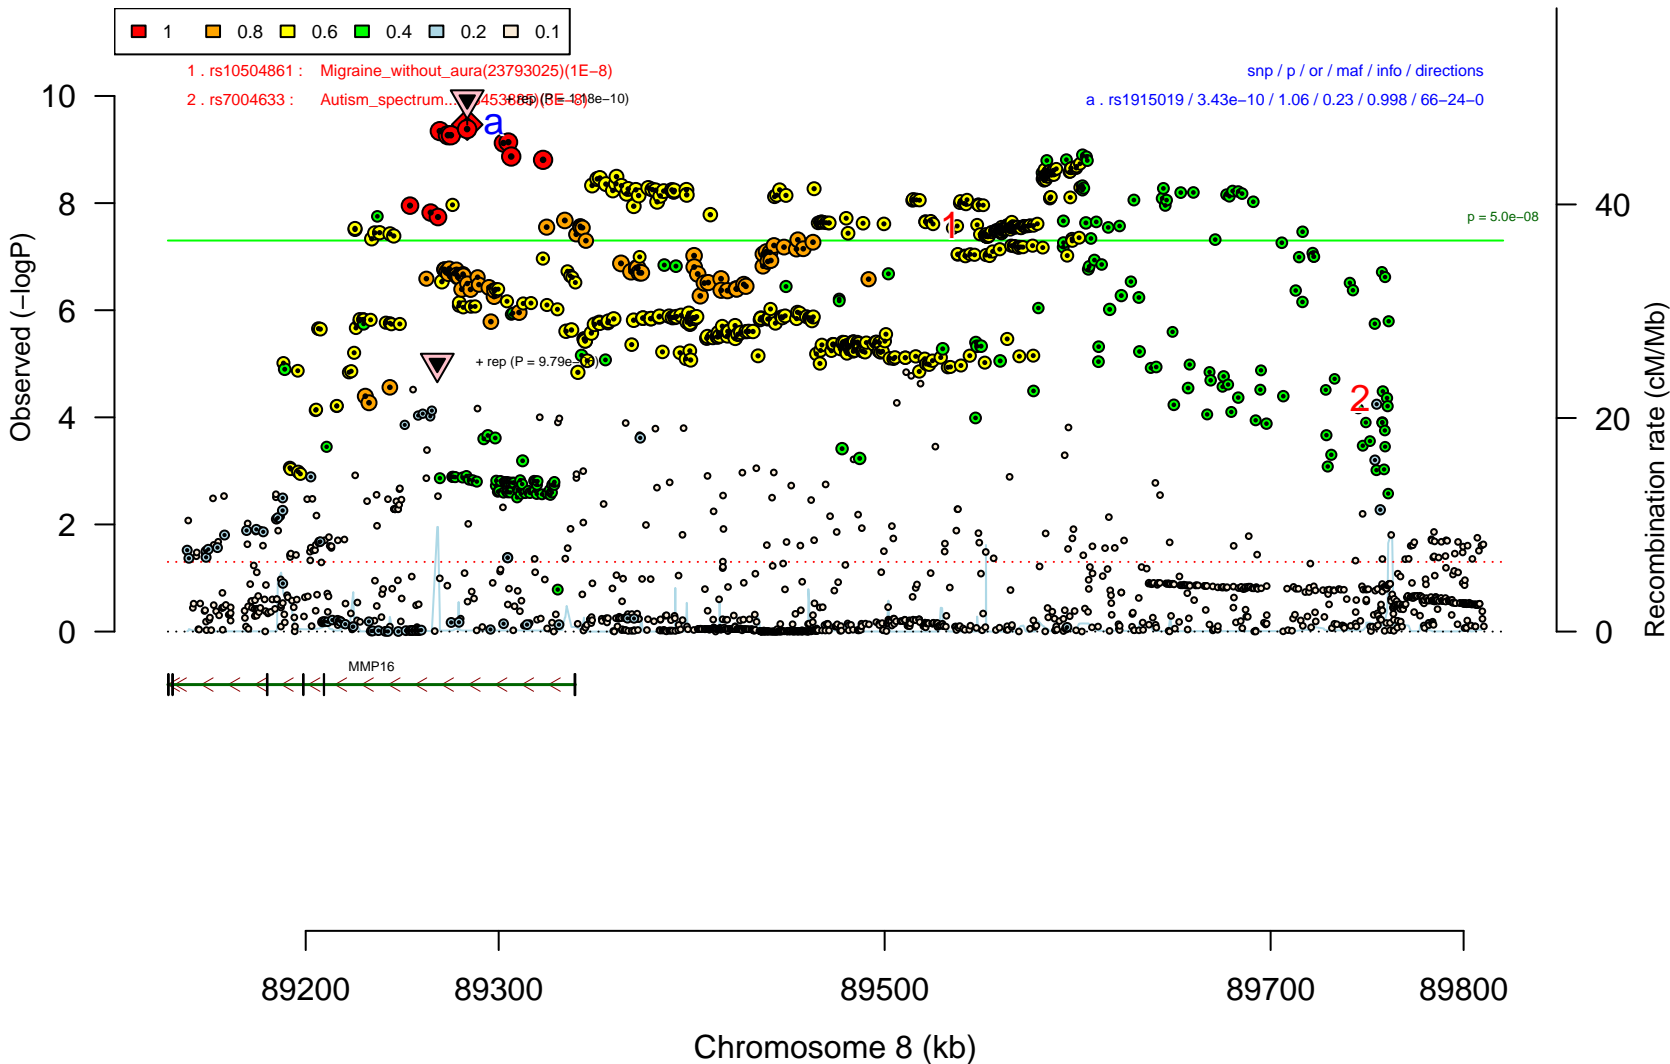

# PGC\_SCZ\_w3\_90\_0418b.191.chr12

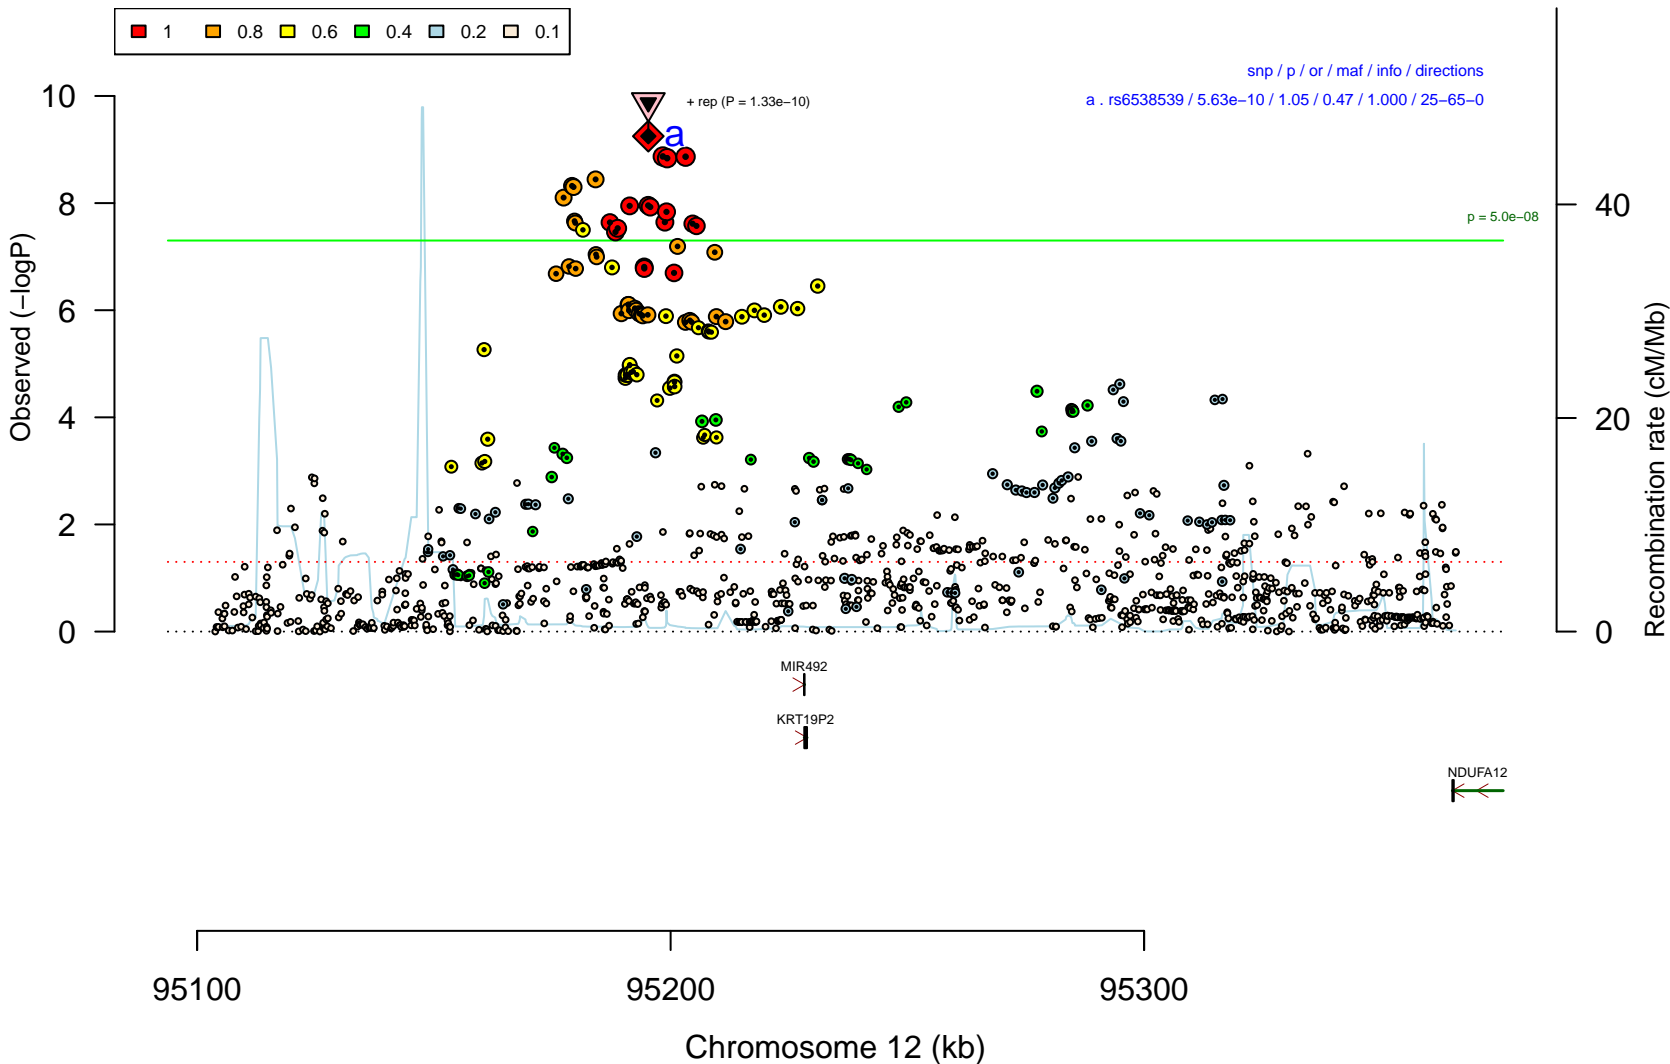



# PGC\_SCZ\_w3\_90\_0418b.235.chr17

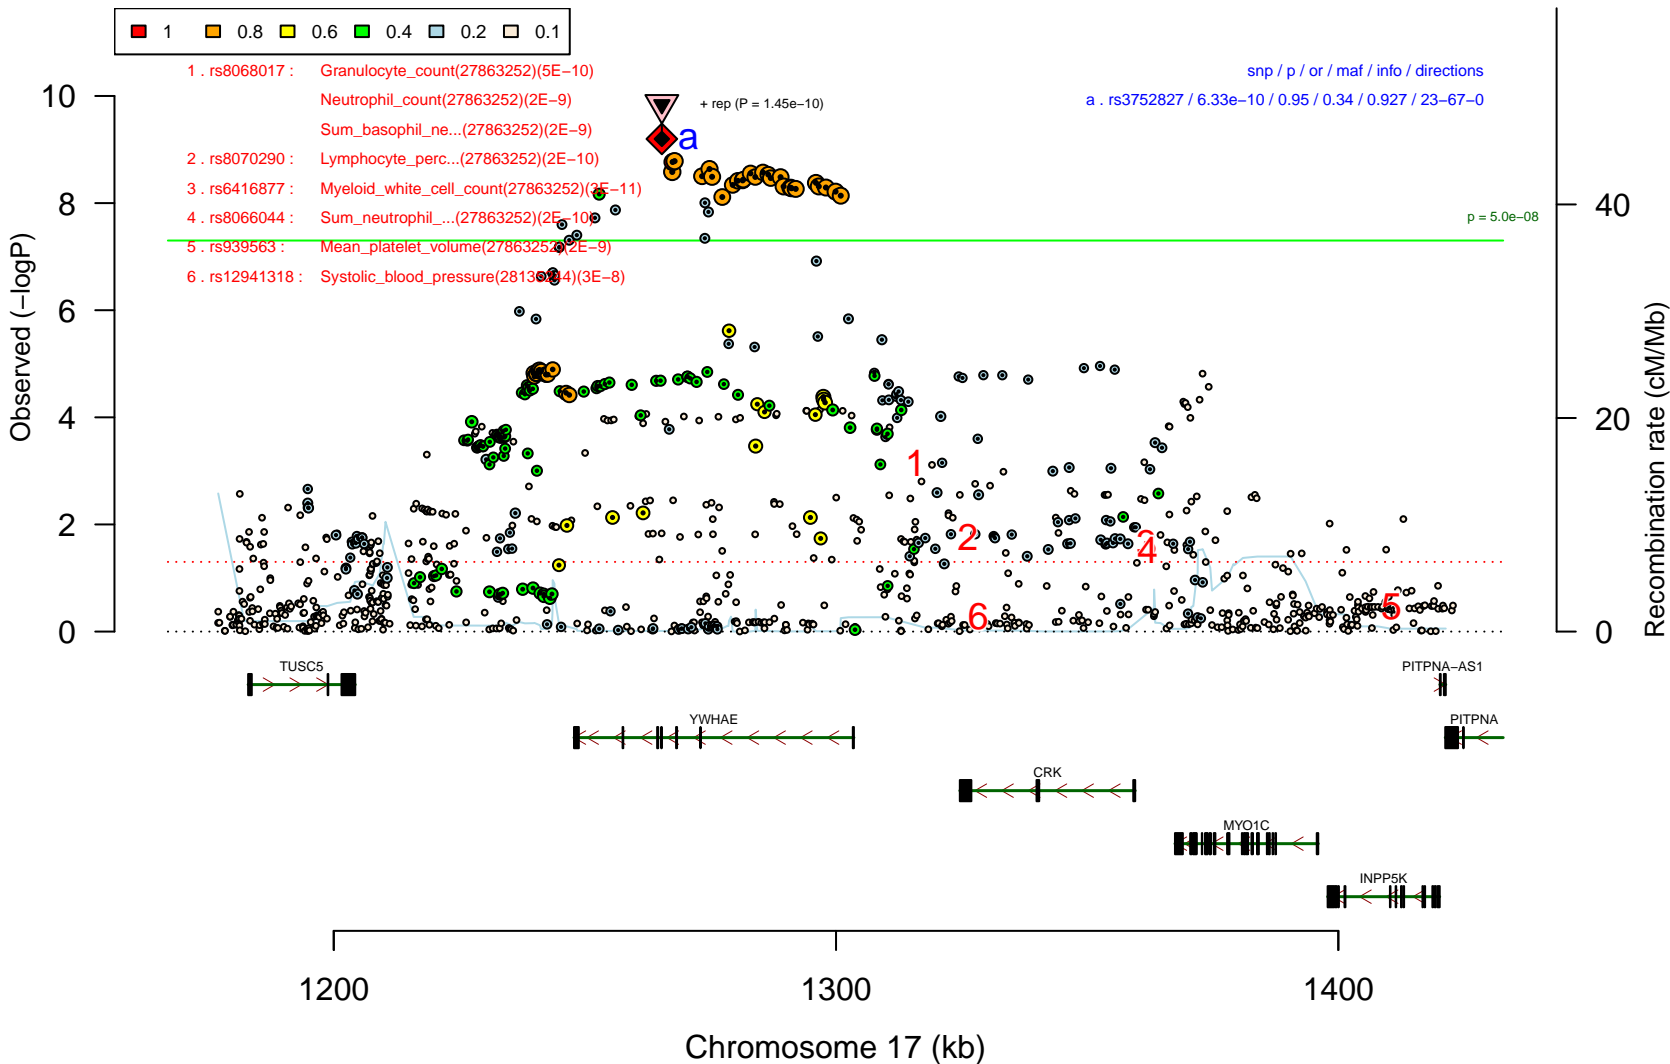

# PGC\_SCZ\_w3\_90\_0418b.229.chr16

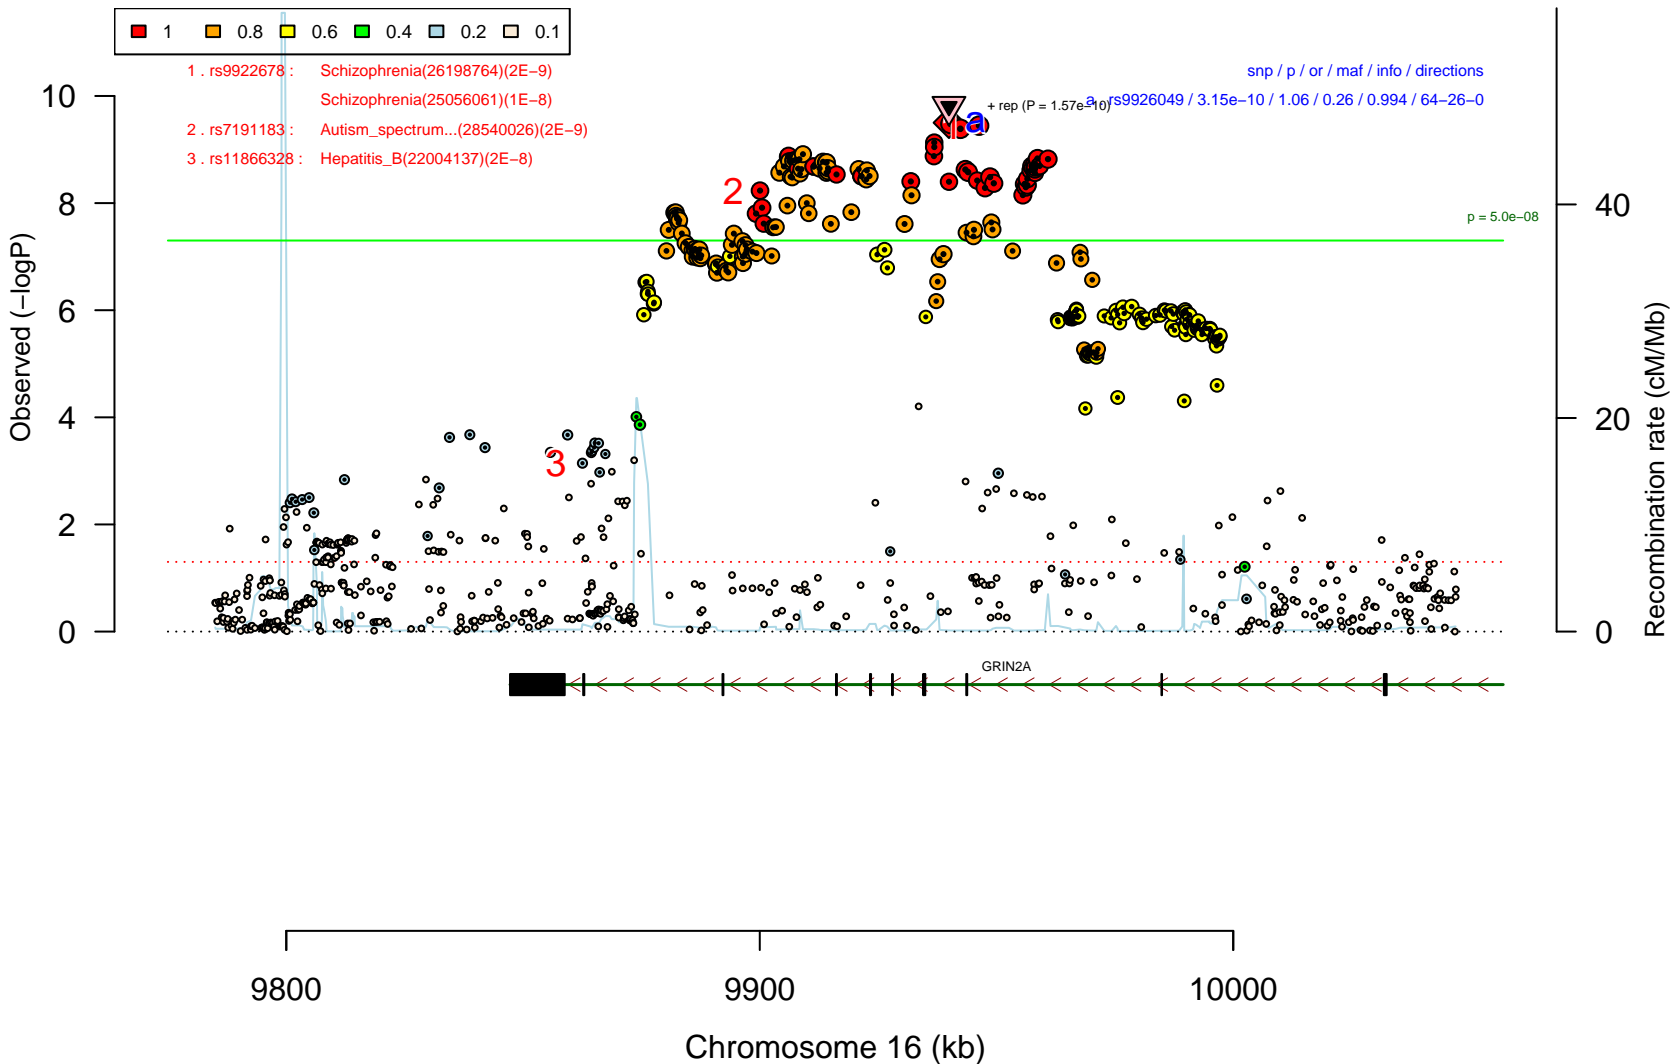

# PGC\_SCZ\_w3\_90\_0418b.259.chr20

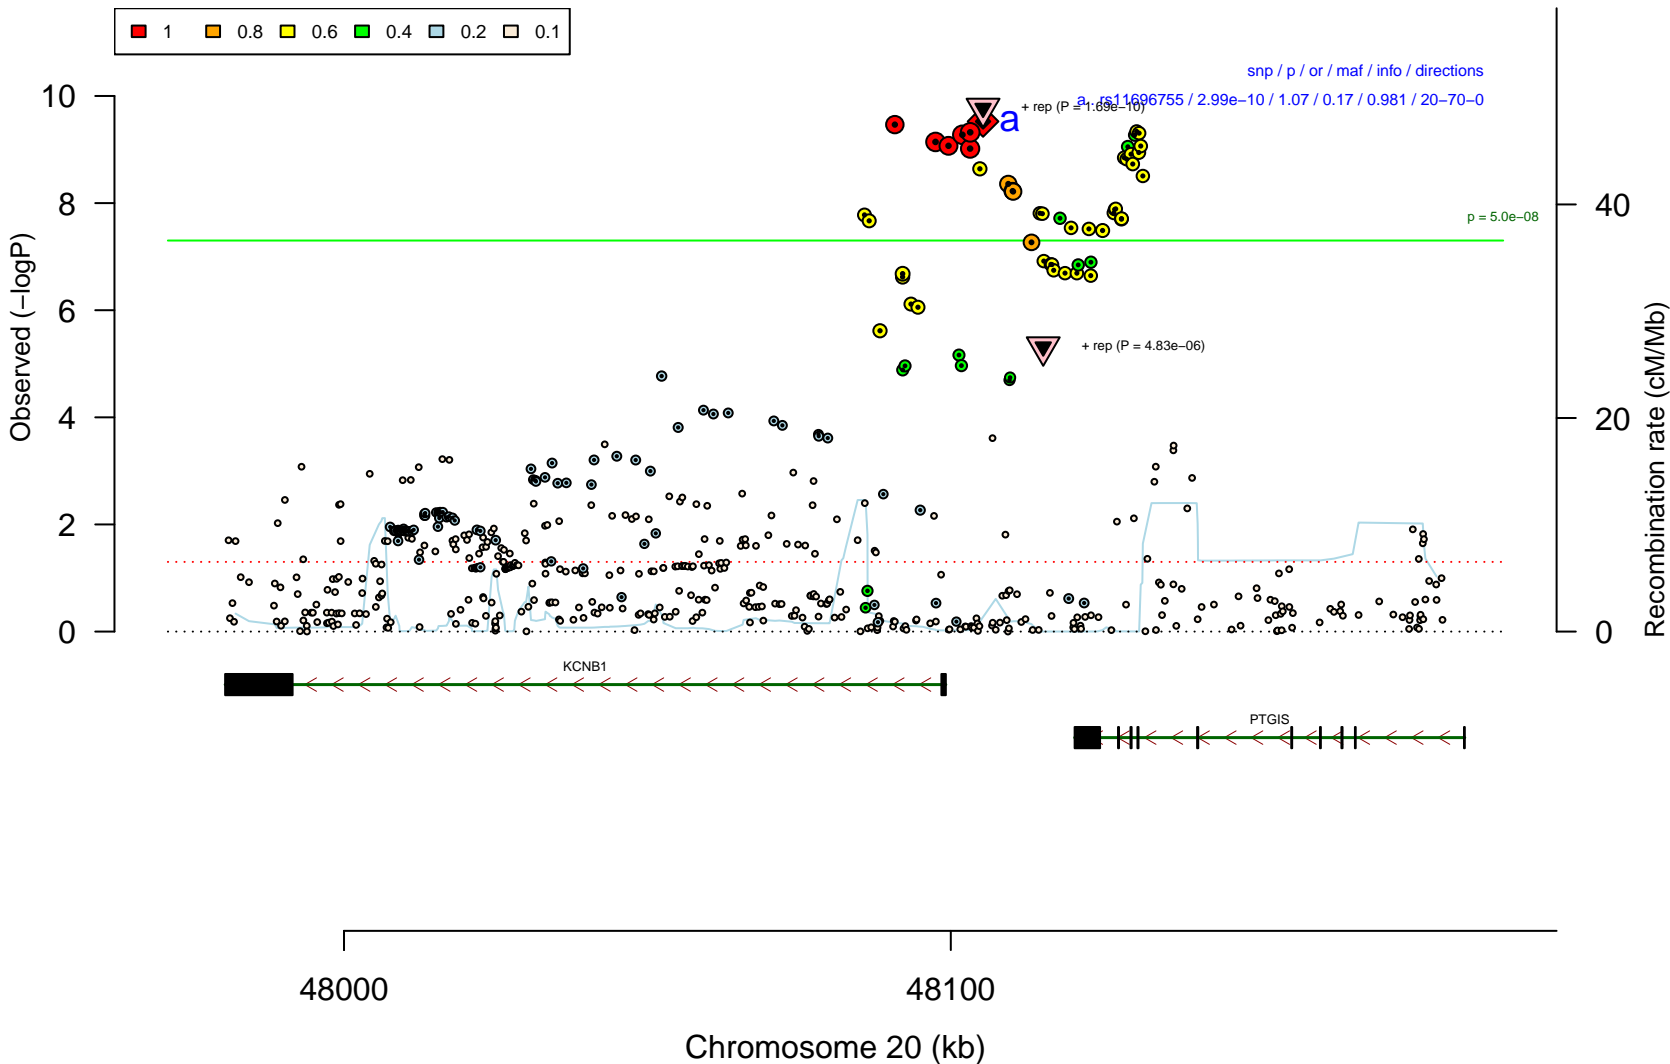

# PGC\_SCZ\_w3\_90\_0418b.64.chr3

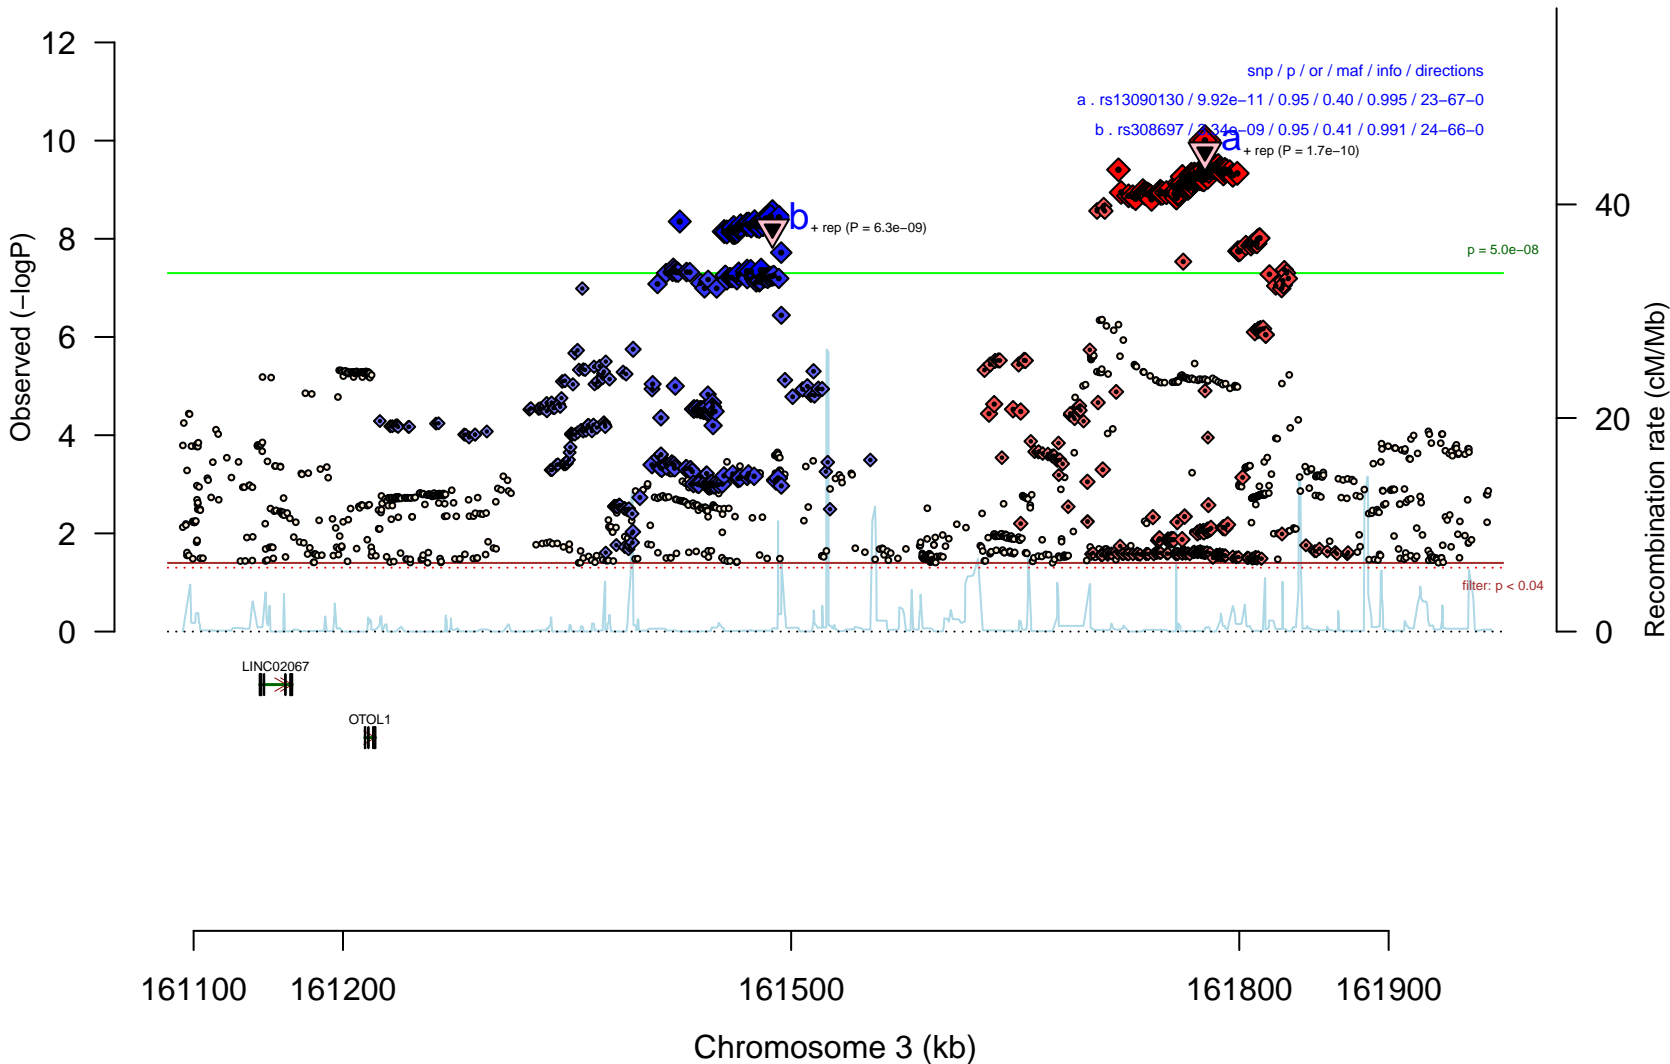

# PGC\_SCZ\_w3\_90\_0418b.94.chr5

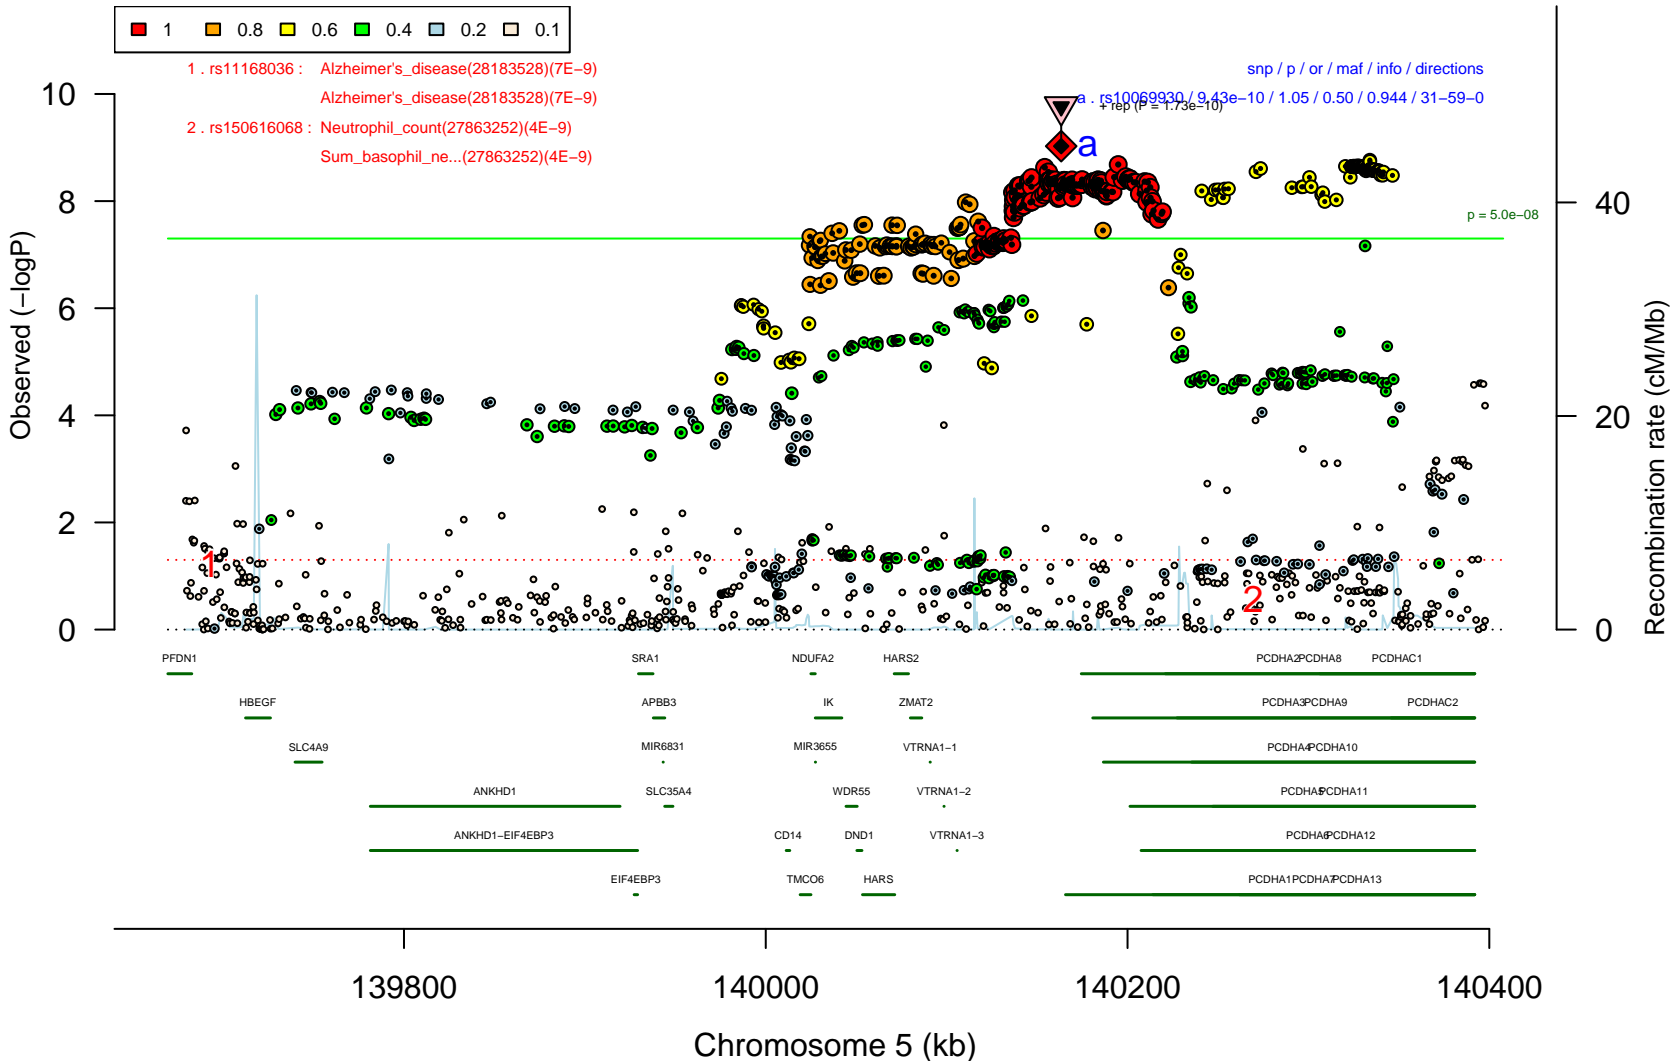

# PGC\_SCZ\_w3\_90\_0418b.39.chr2

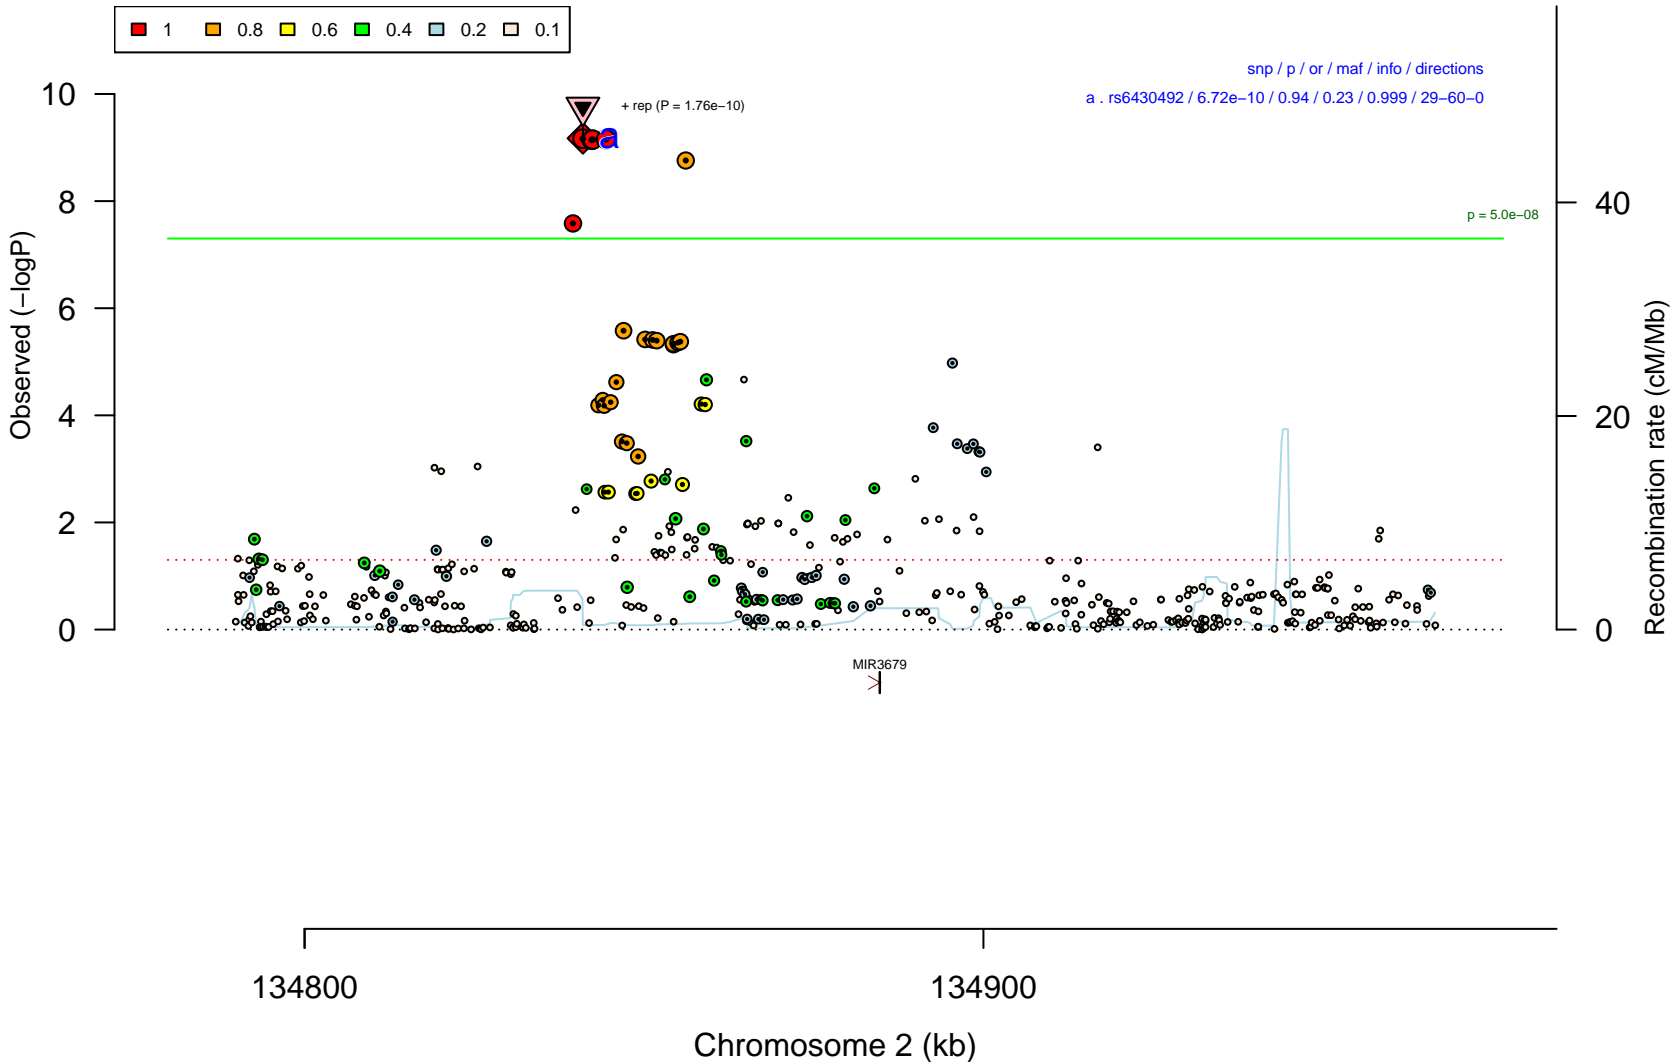

# PGC\_SCZ\_w3\_90\_0418b.105.chr6

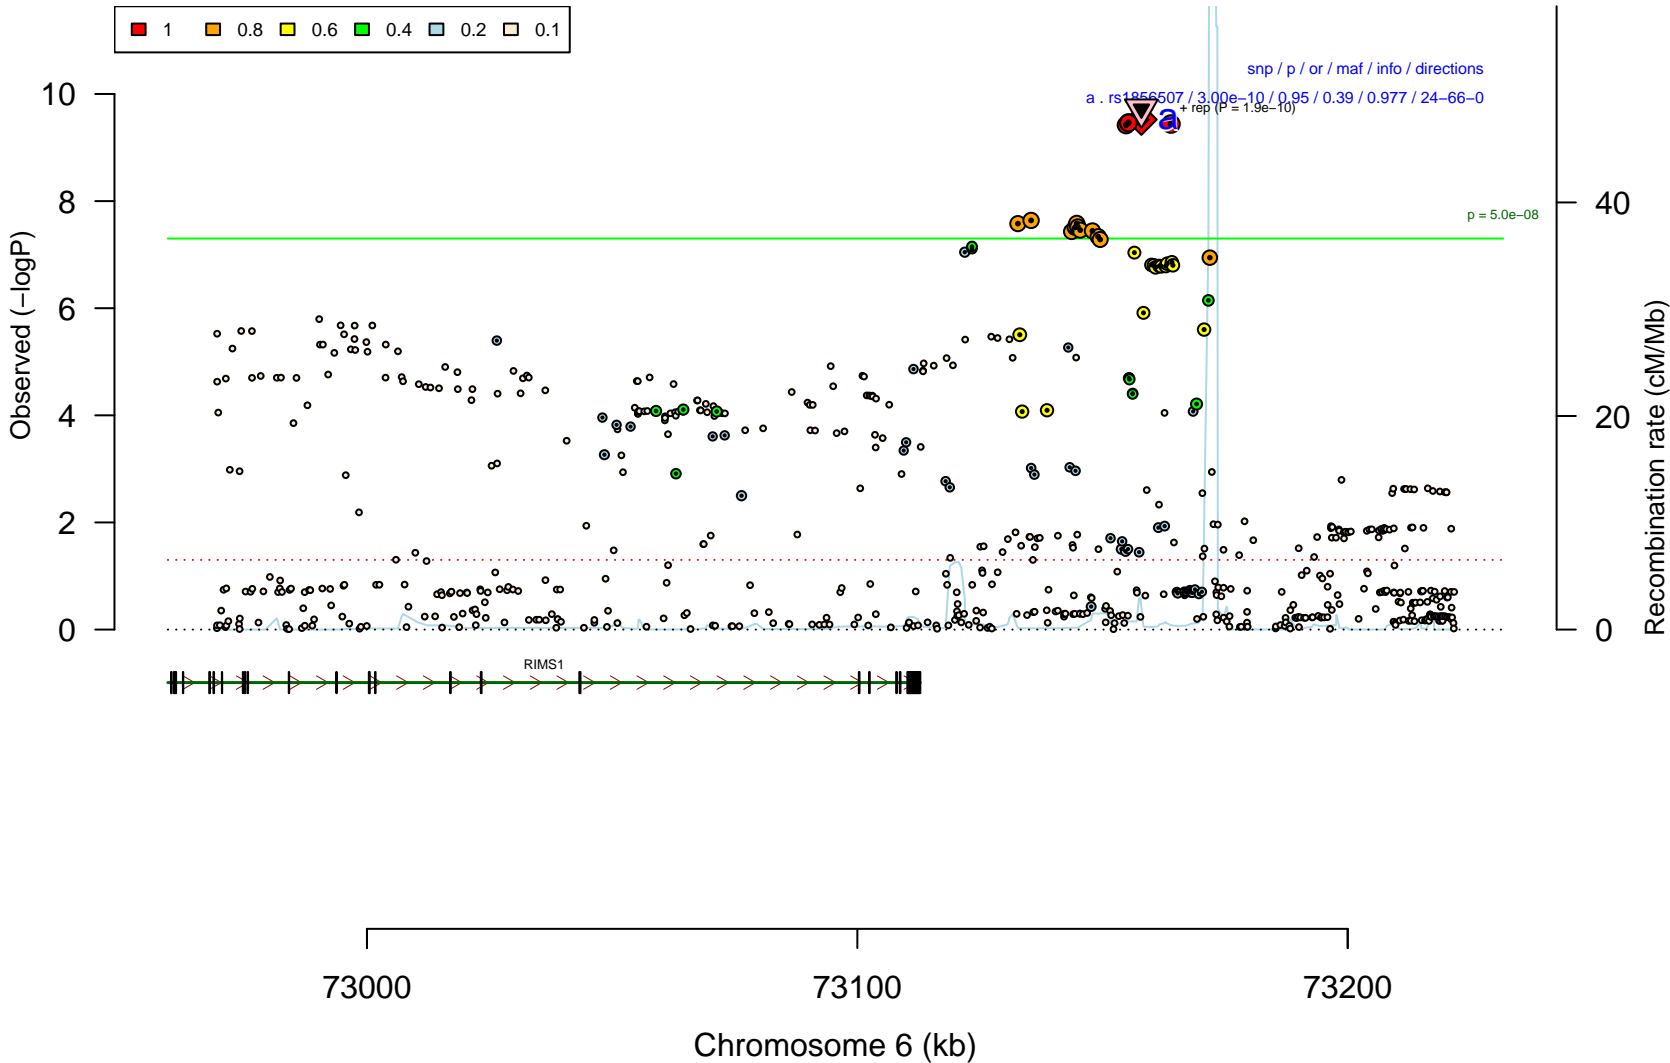

# PGC\_SCZ\_w3\_90\_0418b.61.chr3

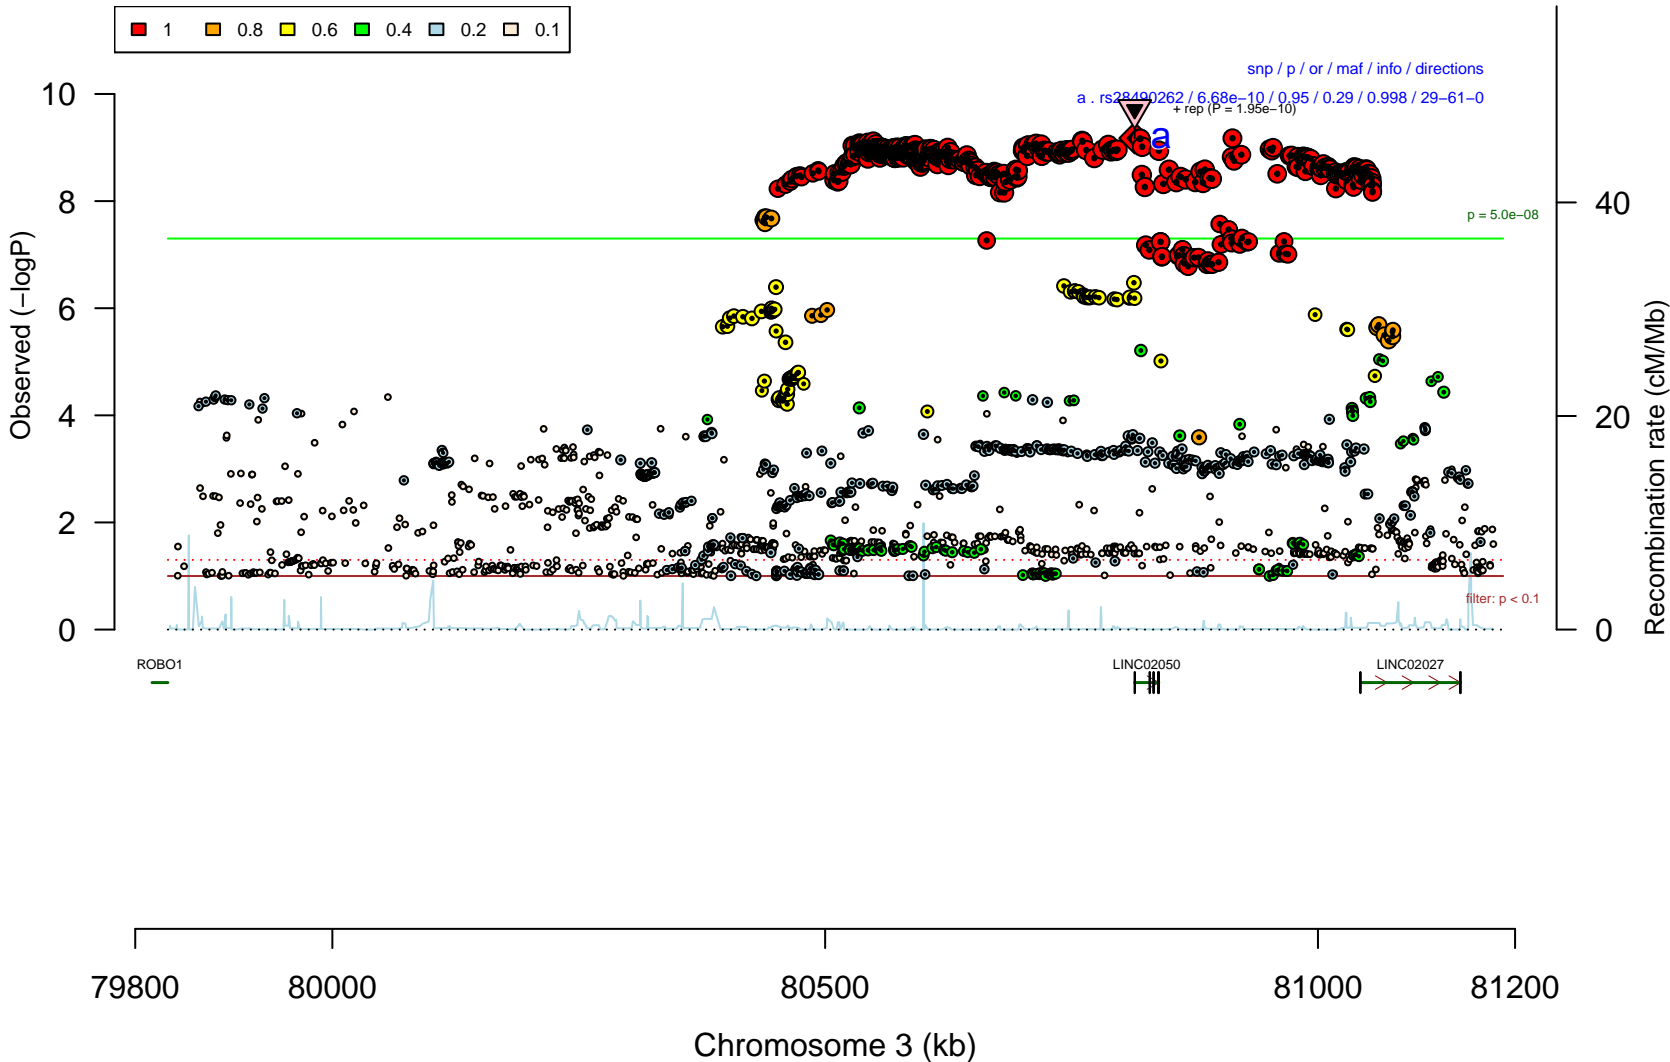



# PGC\_SCZ\_w3\_90\_0418b.166.chr11

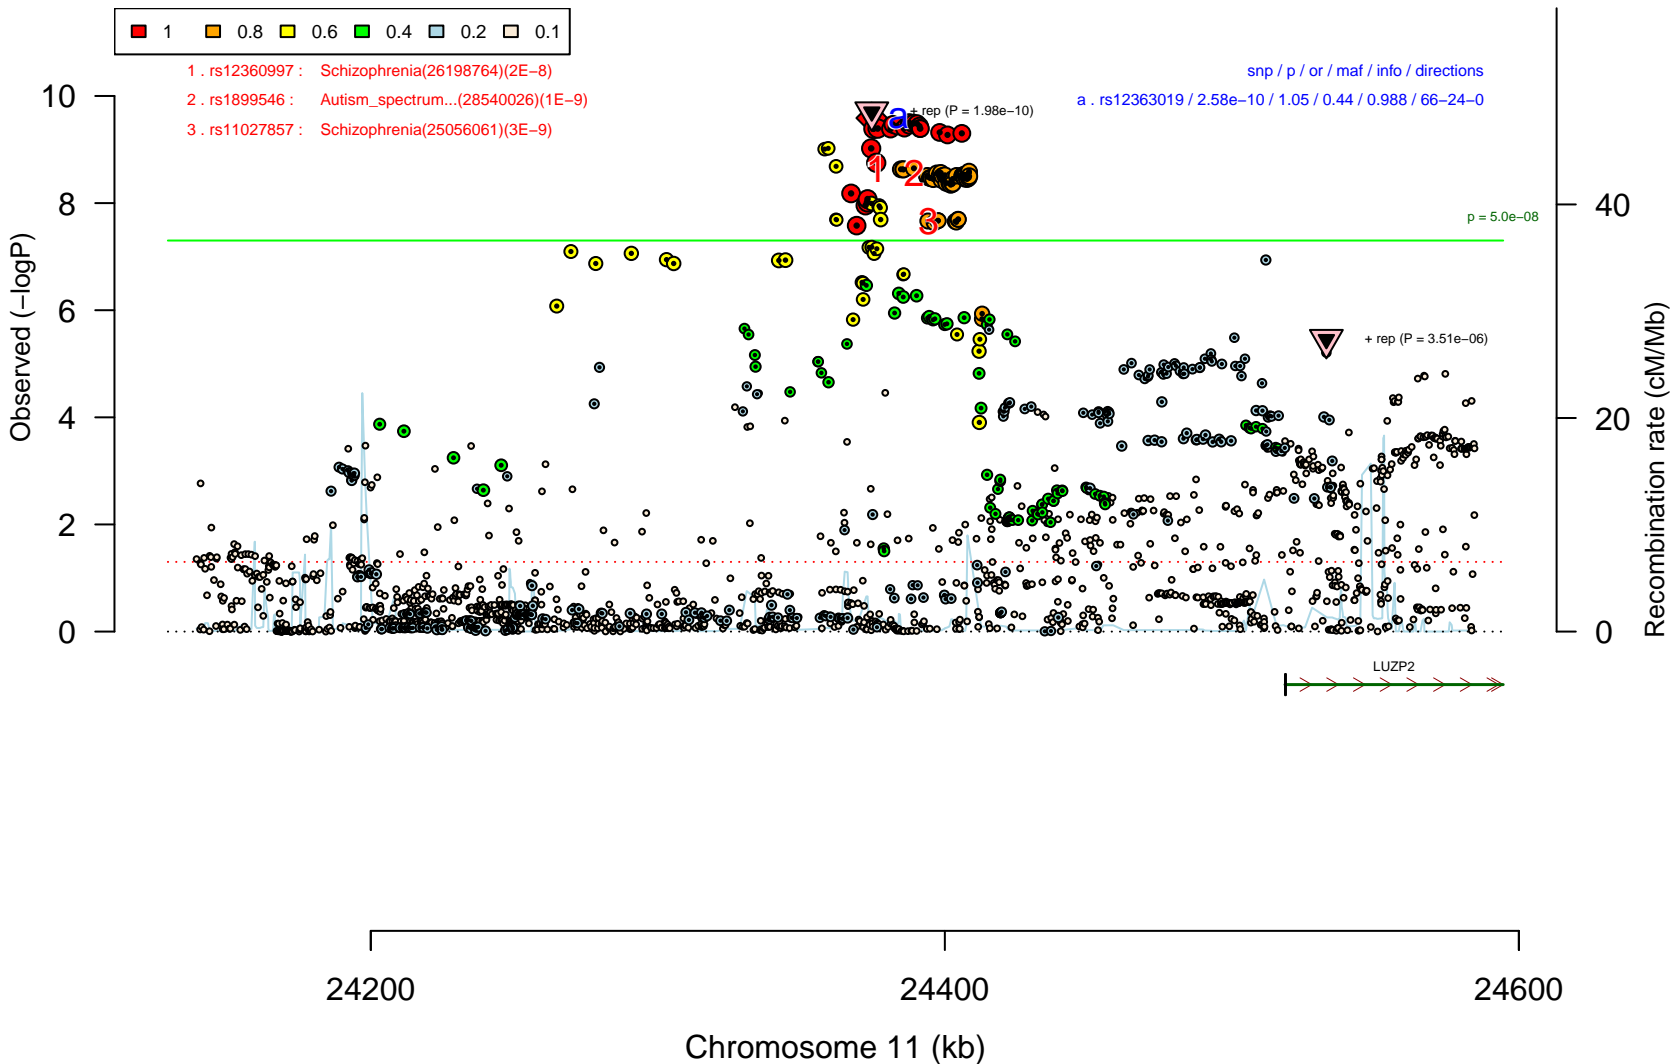

# PGC\_SCZ\_w3\_90\_0418b.256.chr19

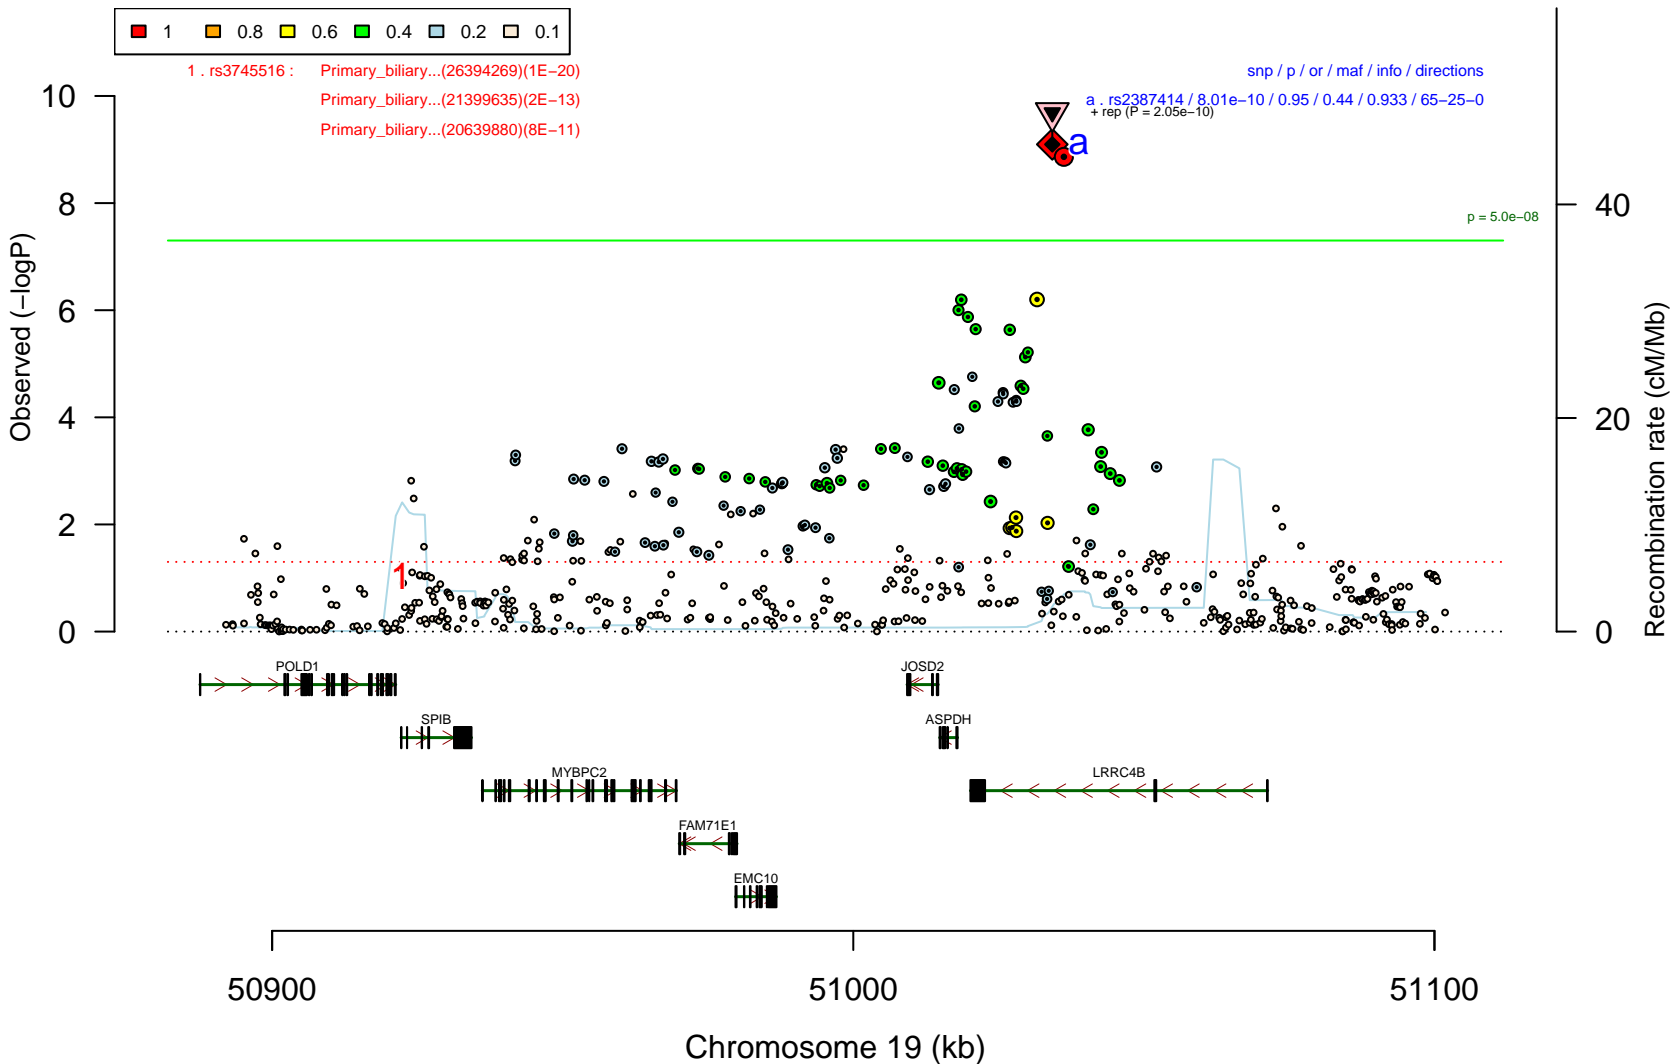

# PGC\_SCZ\_w3\_90\_0418b.142.chr8

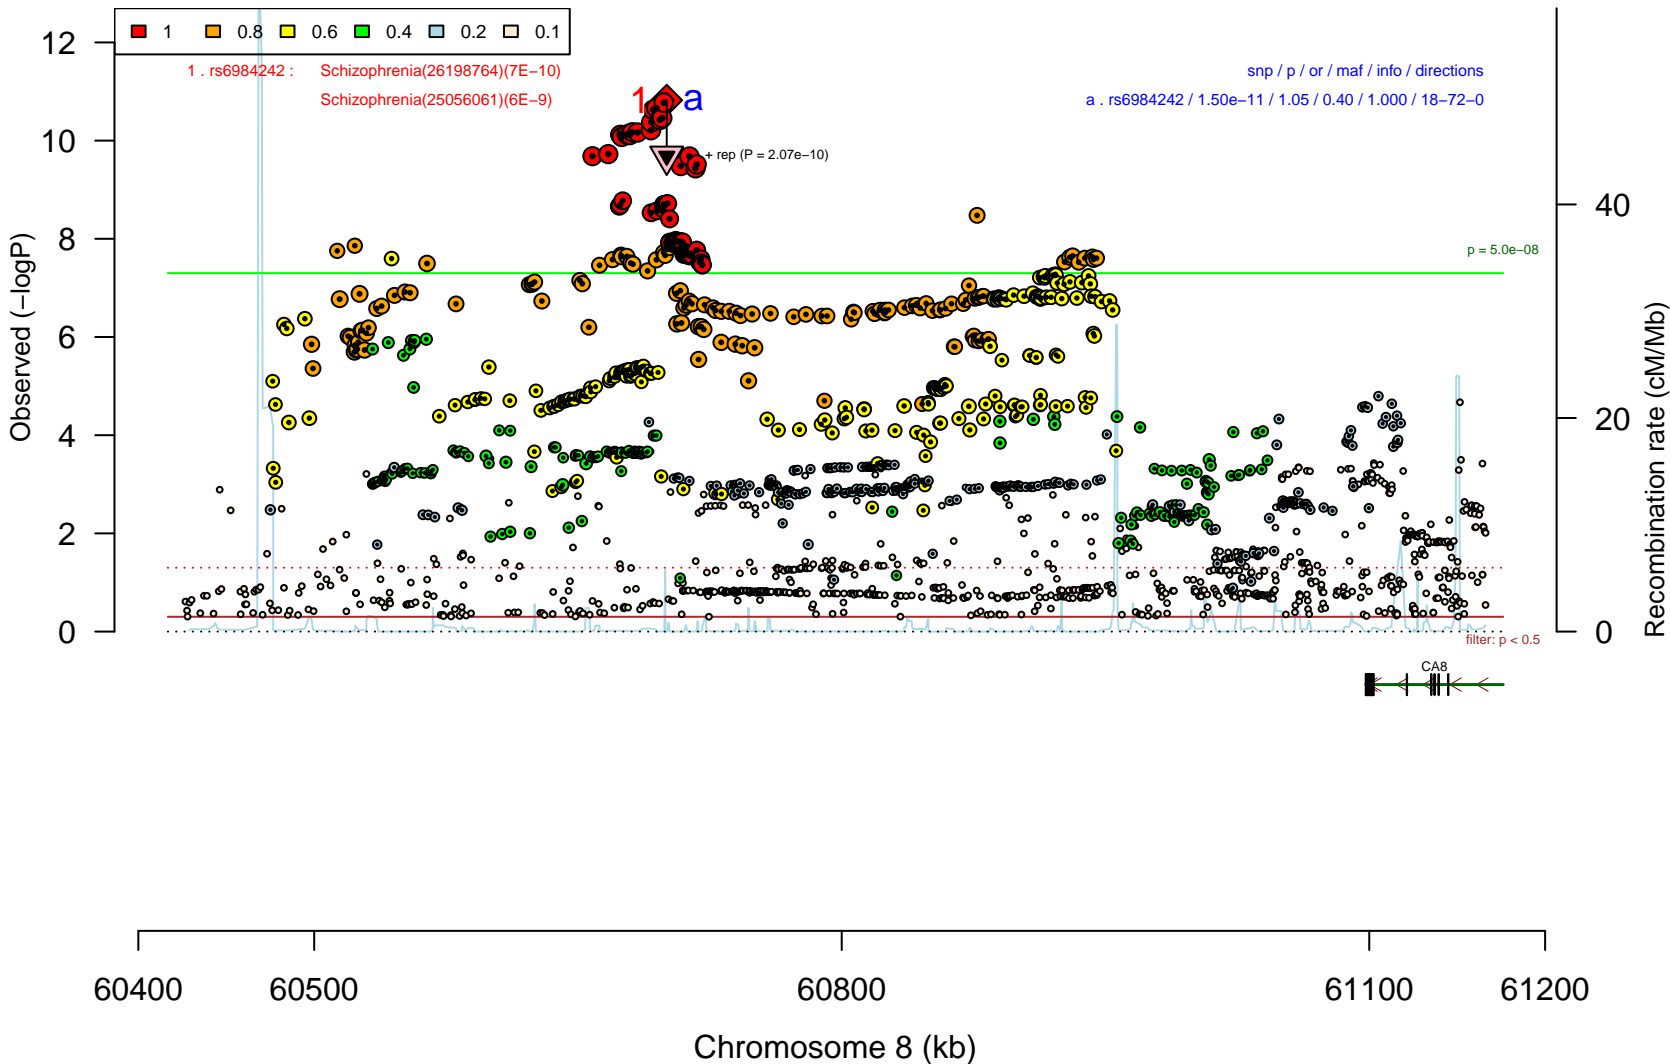

# PGC\_SCZ\_w3\_90\_0418b.106.chr6

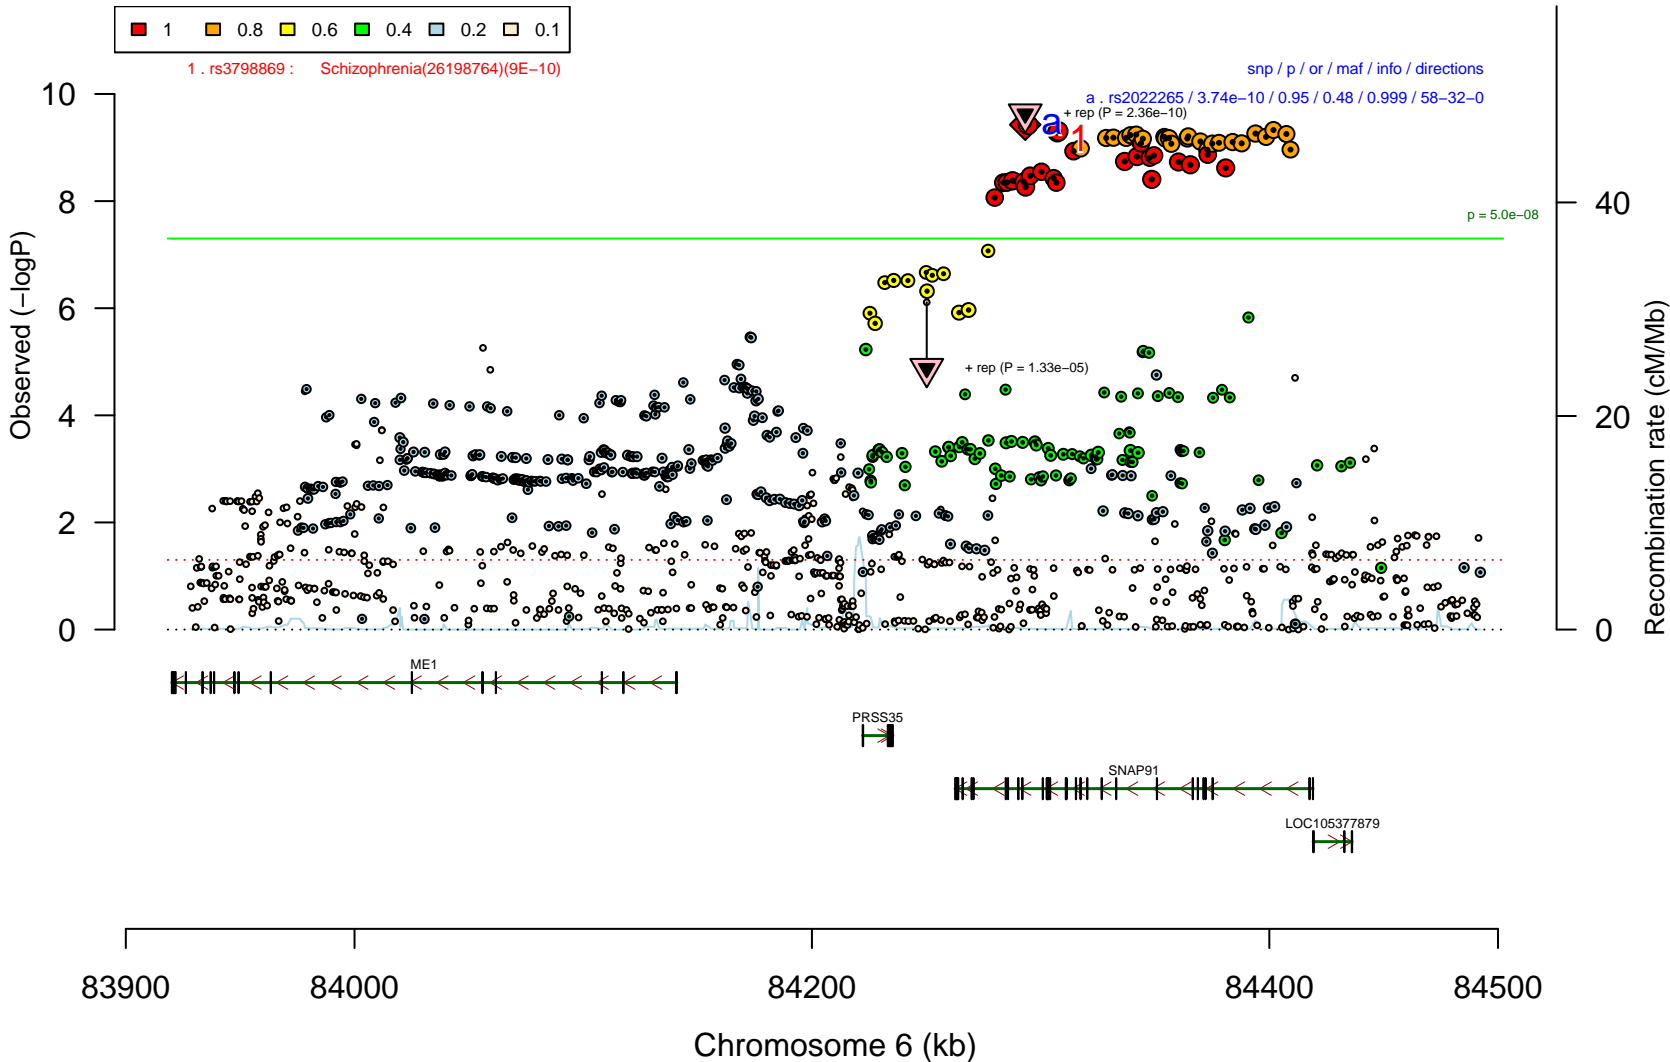

# PGC\_SCZ\_w3\_90\_0418b.252.chr19

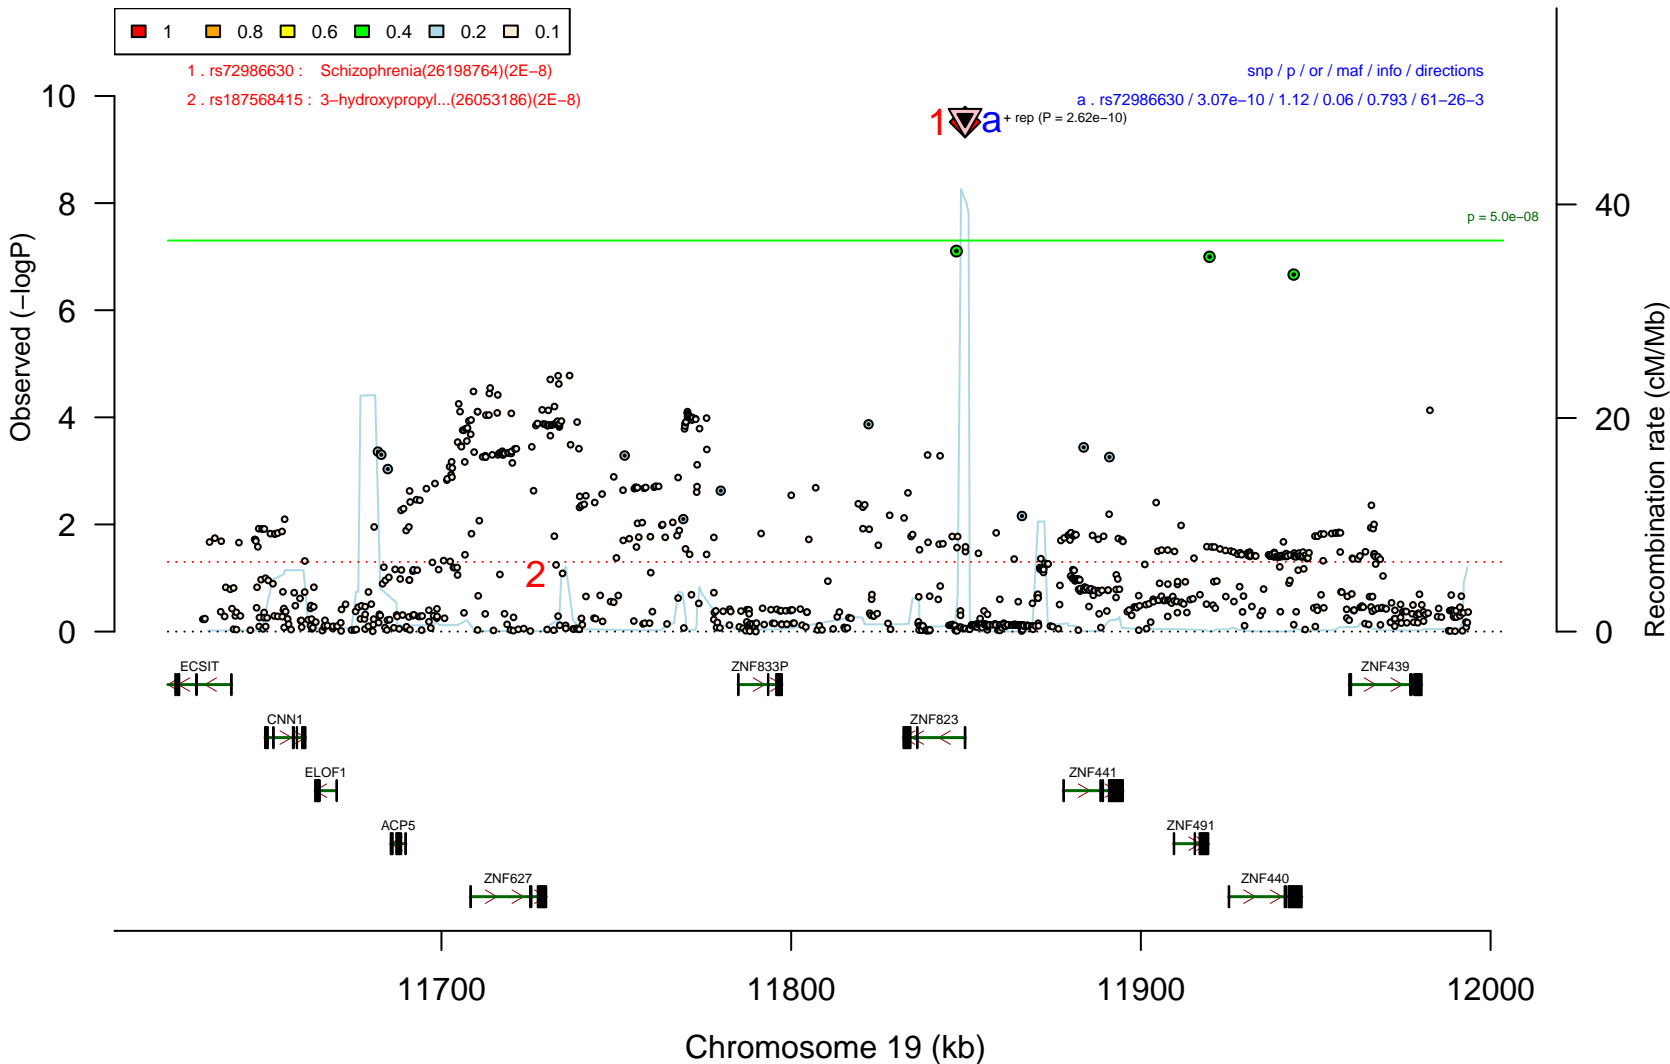

# PGC\_SCZ\_w3\_90\_0418b.9.chr1

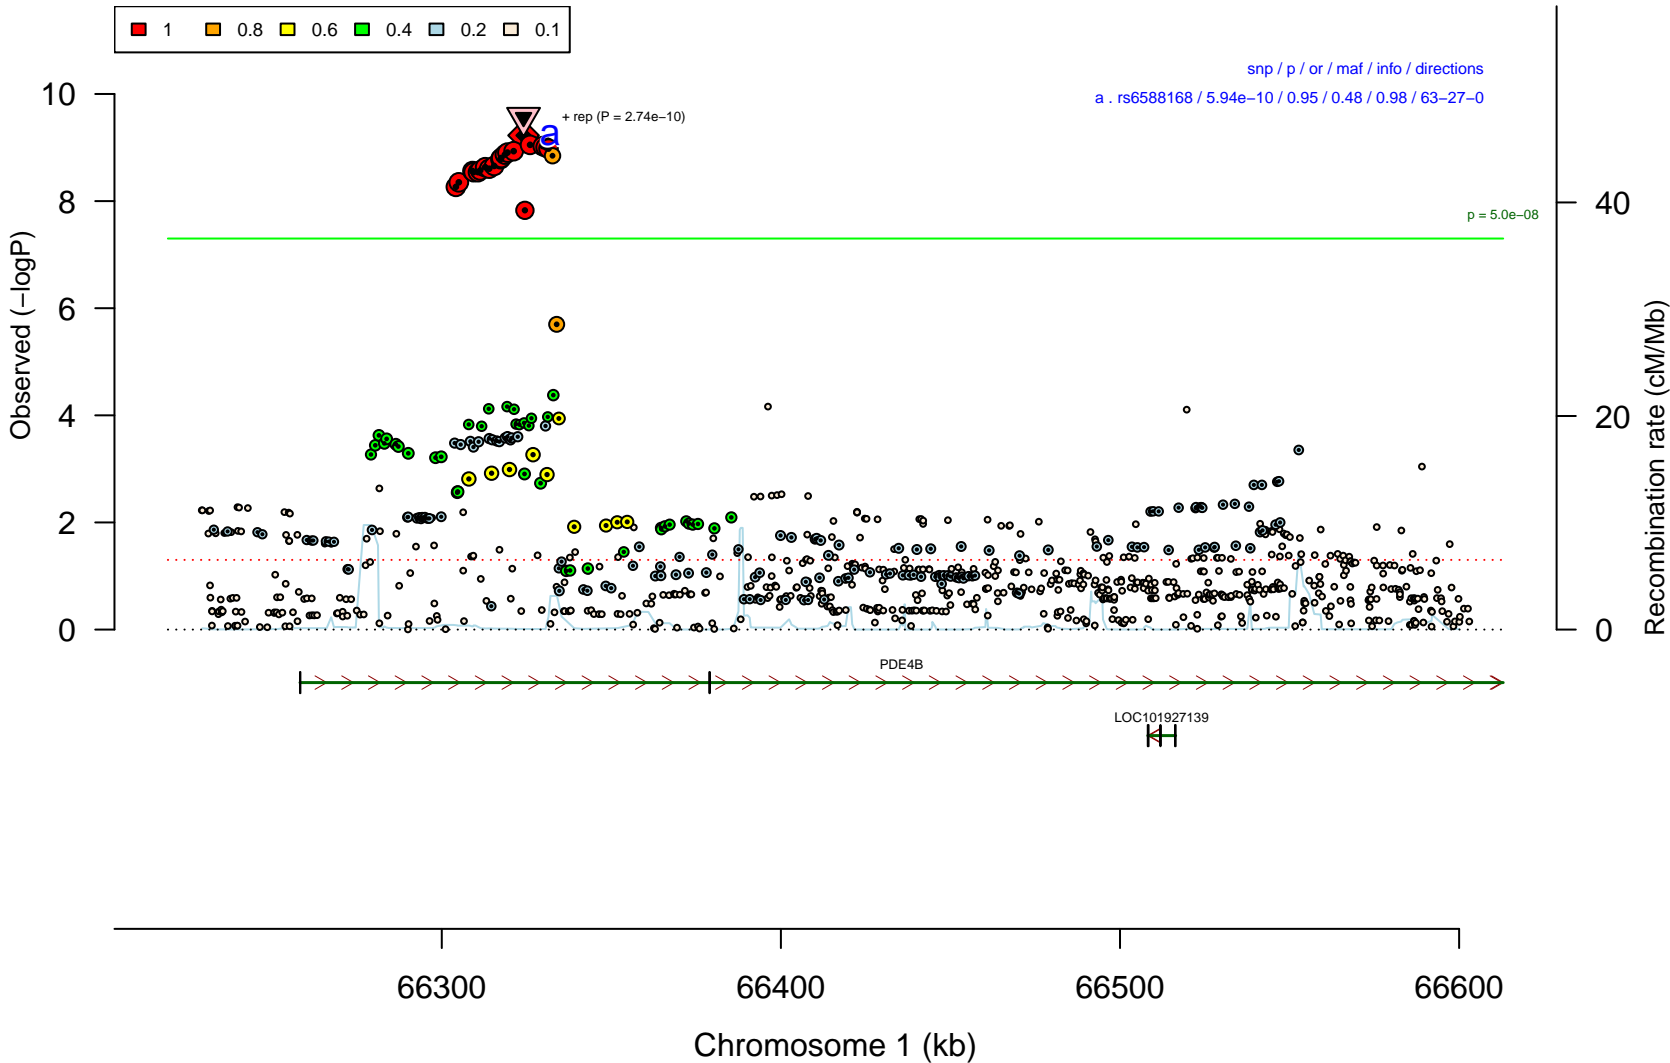

# PGC\_SCZ\_w3\_90\_0418b.143.chr8

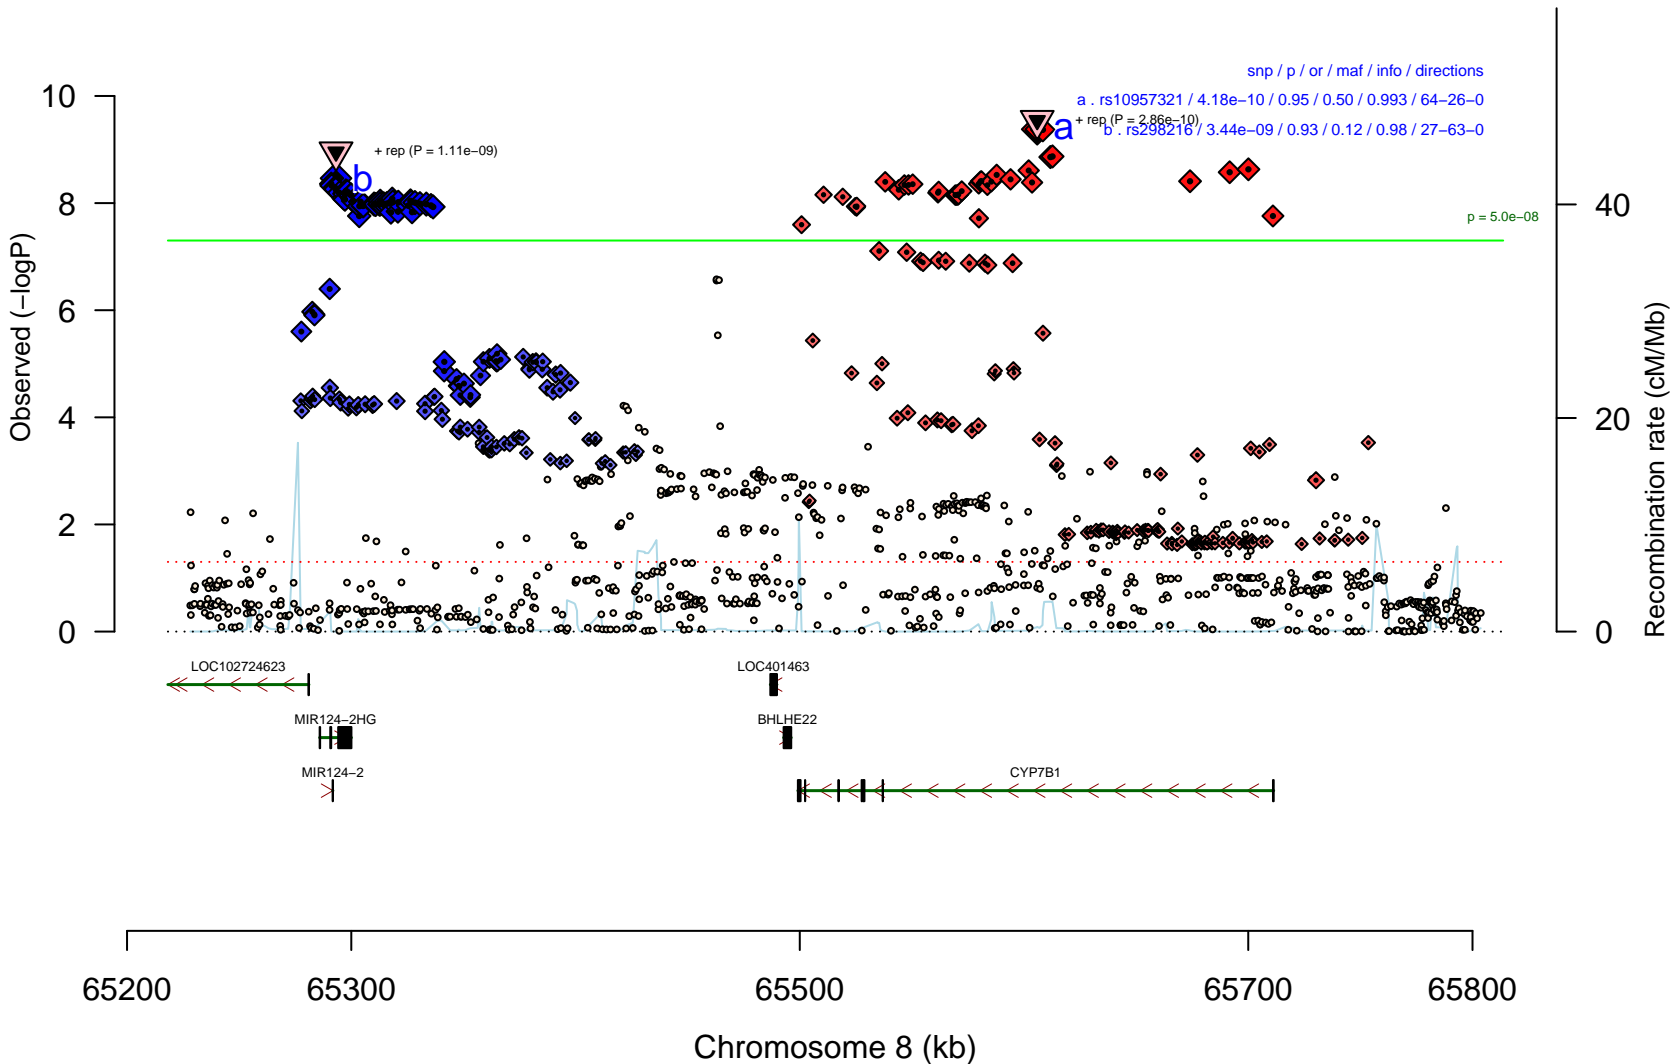

# PGC\_SCZ\_w3\_90\_0418b.10.chr1

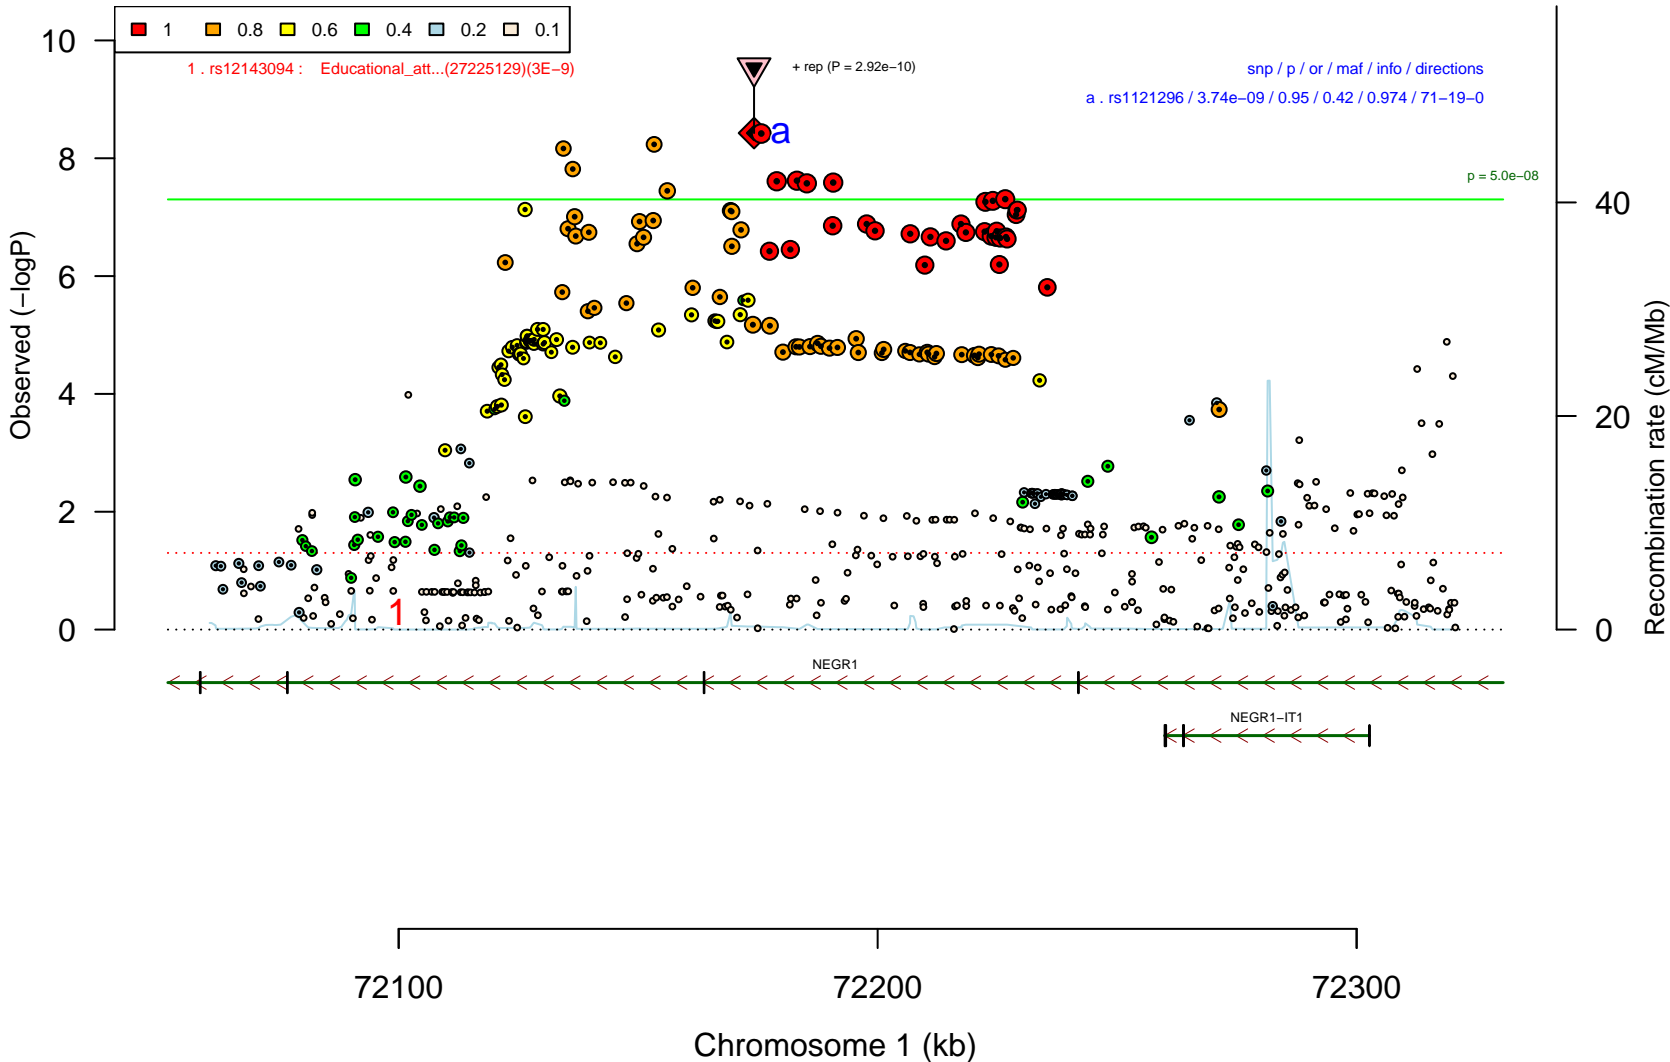



# PGC\_SCZ\_w3\_90\_0418b.150.chr9

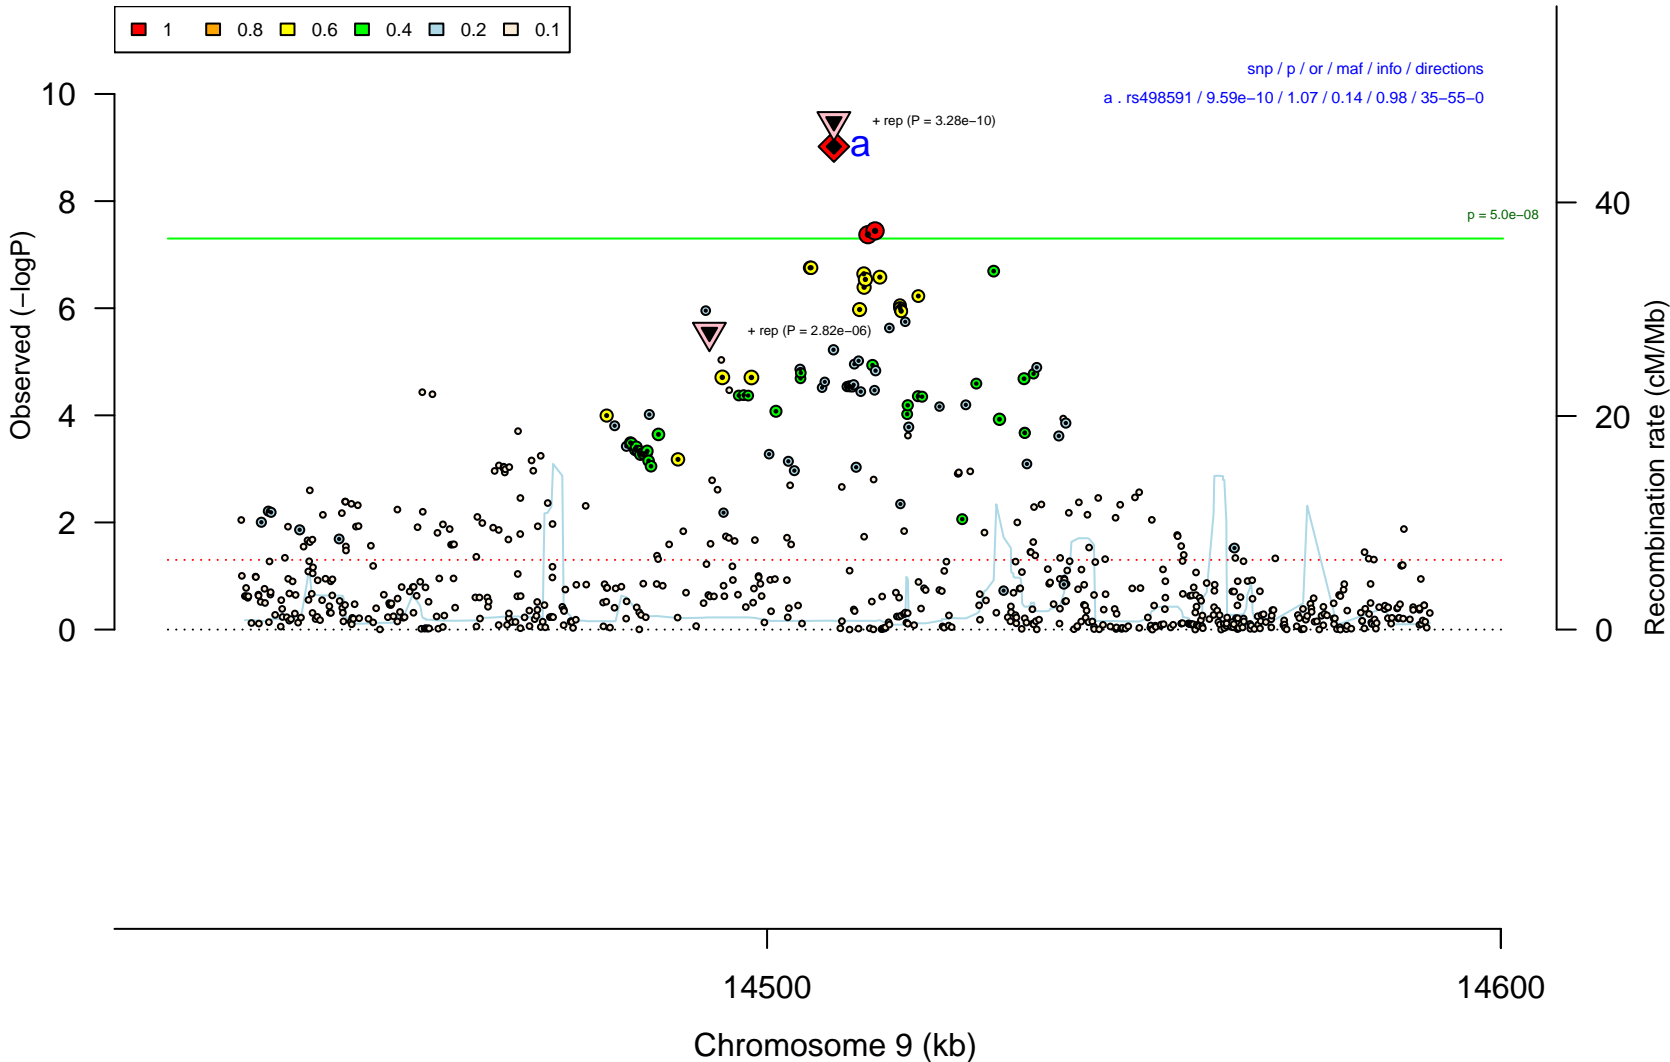

# PGC\_SCZ\_w3\_90\_0418b.50.chr2

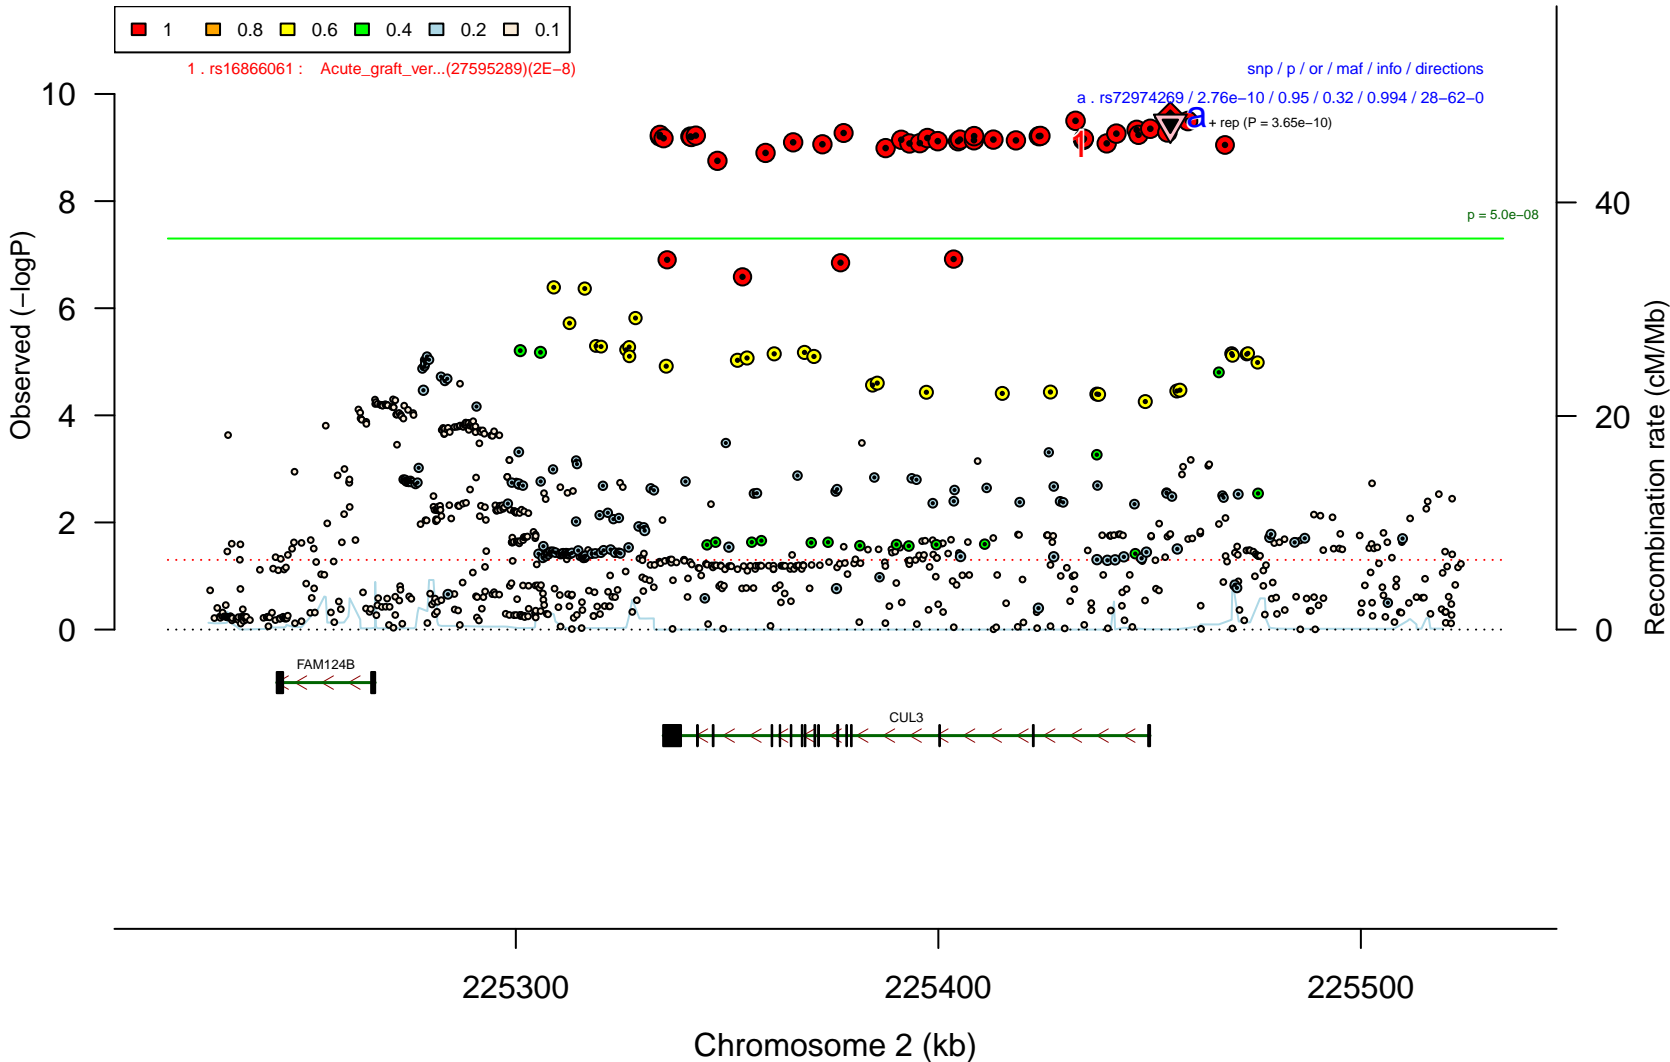

# PGC\_SCZ\_w3\_90\_0418b.168.chr11

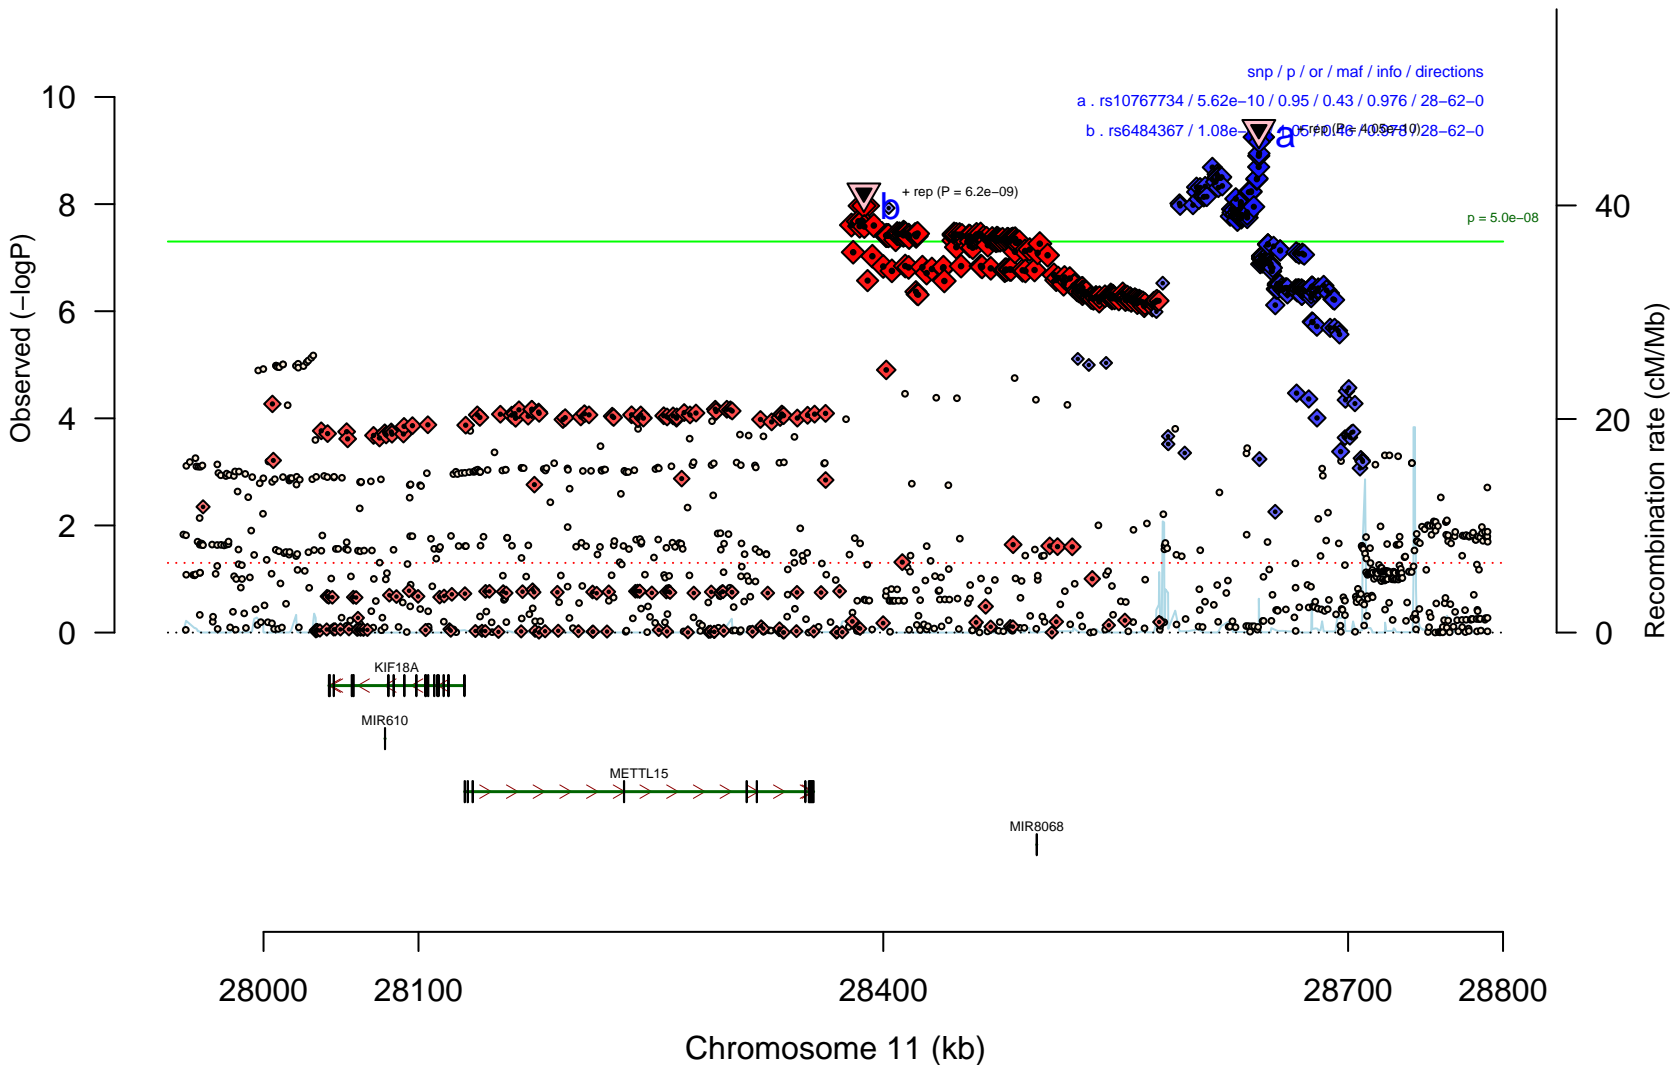

# PGC\_SCZ\_w3\_90\_0418b.109.chr6

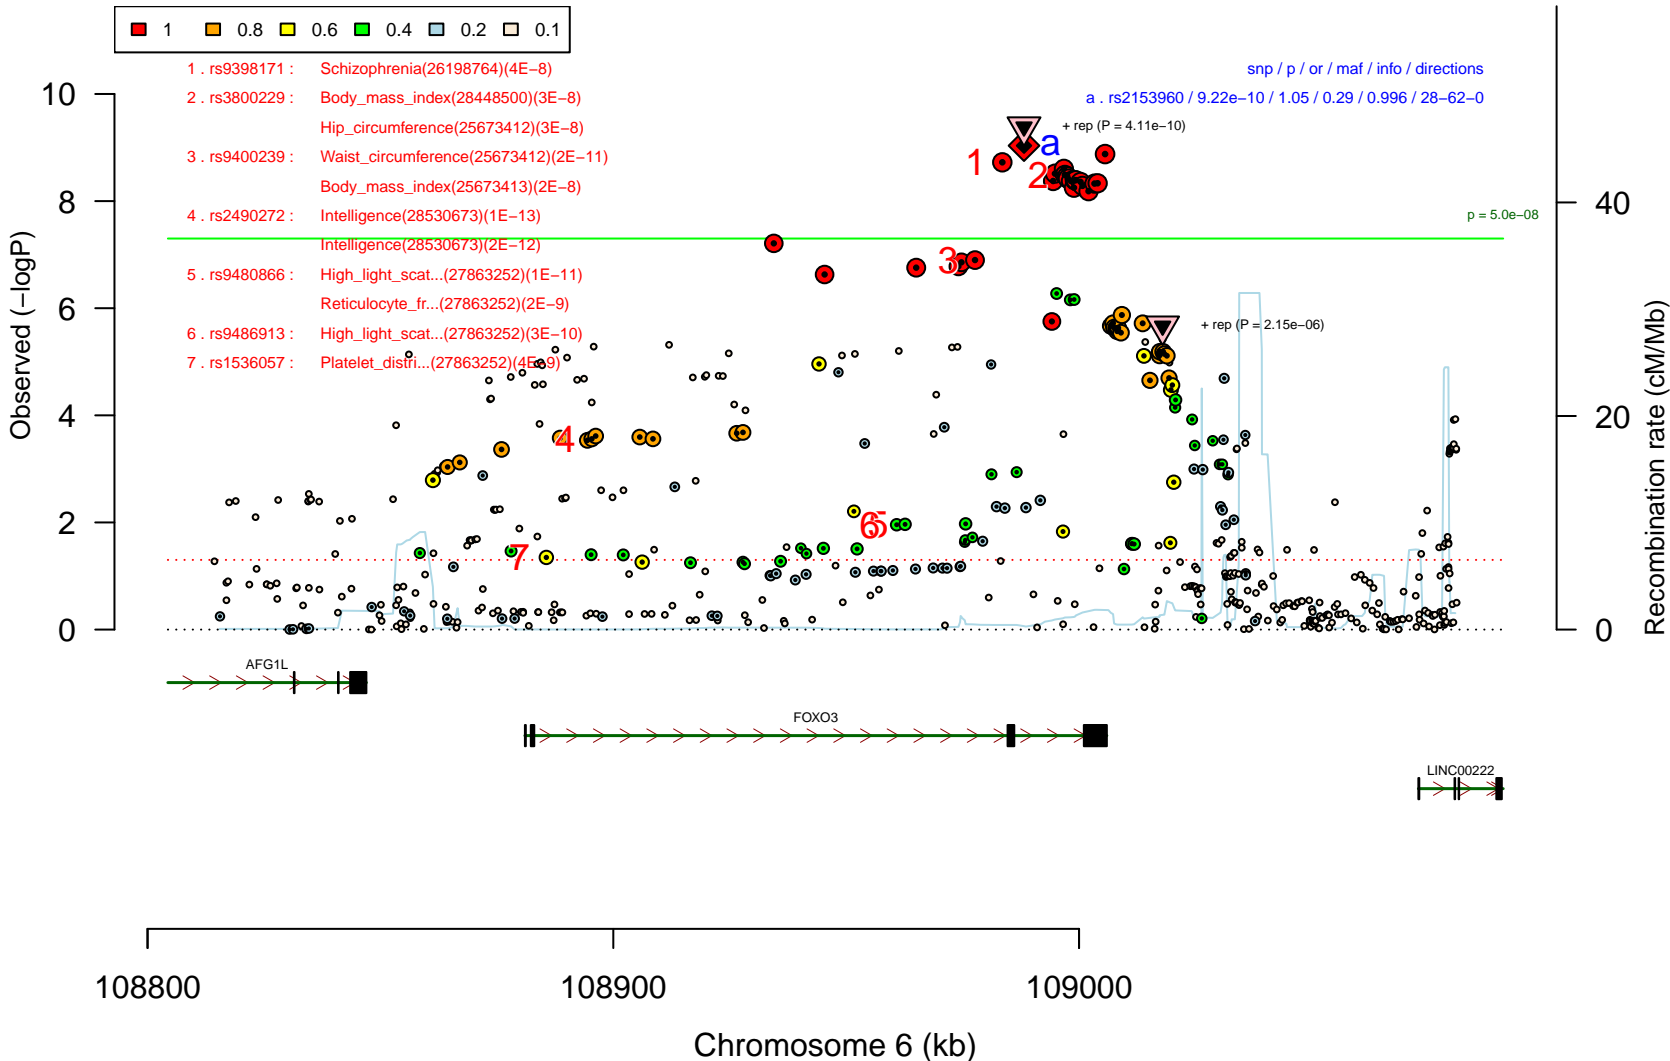

# PGC\_SCZ\_w3\_90\_0418b.184.chr12

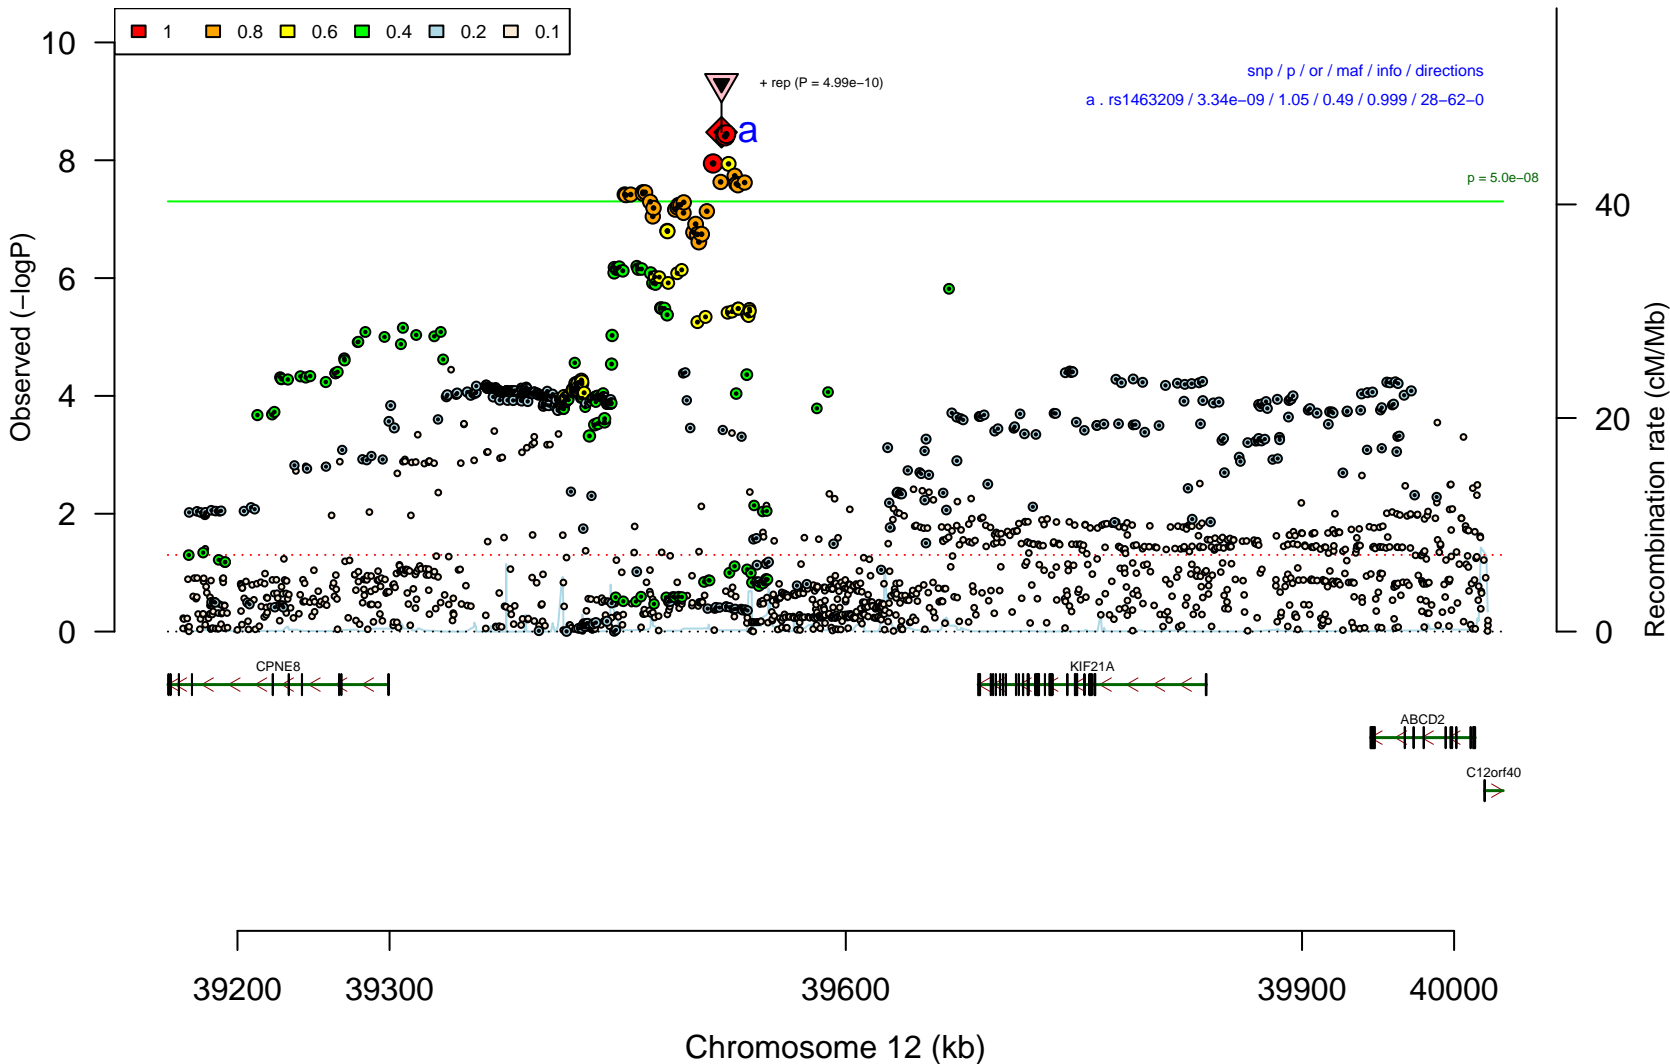

# PGC\_SCZ\_w3\_90\_0418b.3.chr1

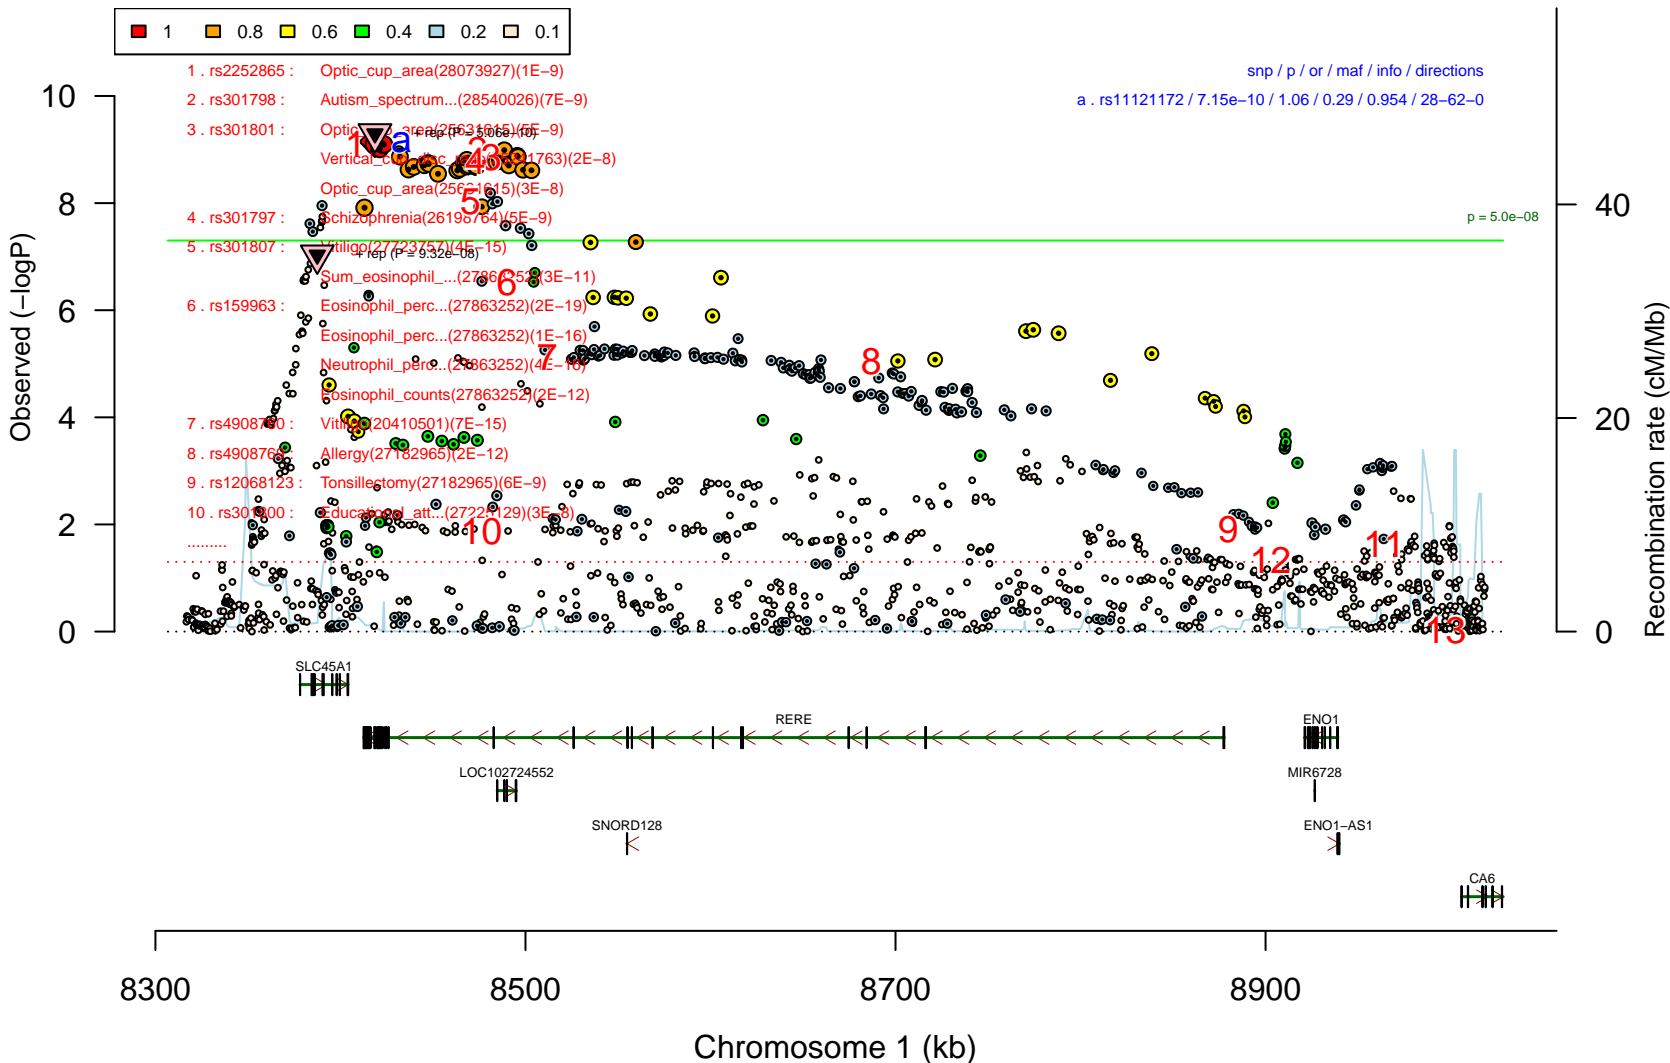

# PGC\_SCZ\_w3\_90\_0418b.197.chr12

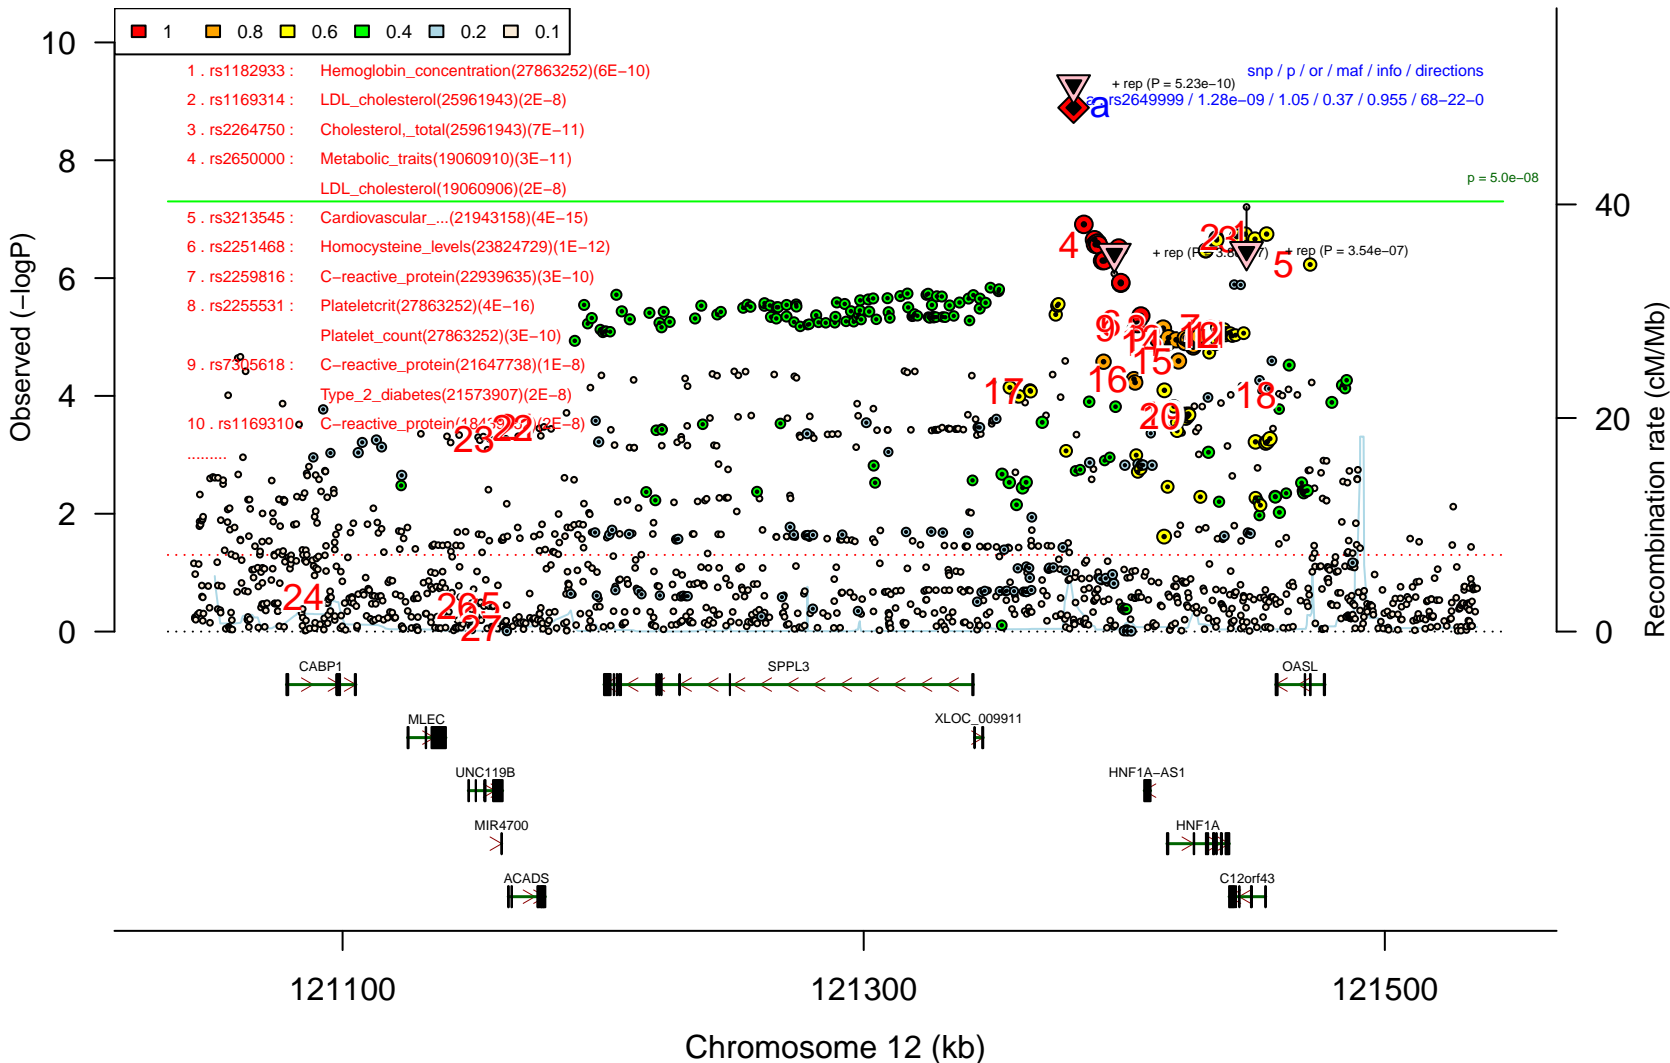

# PGC\_SCZ\_w3\_90\_0418b.140.chr8

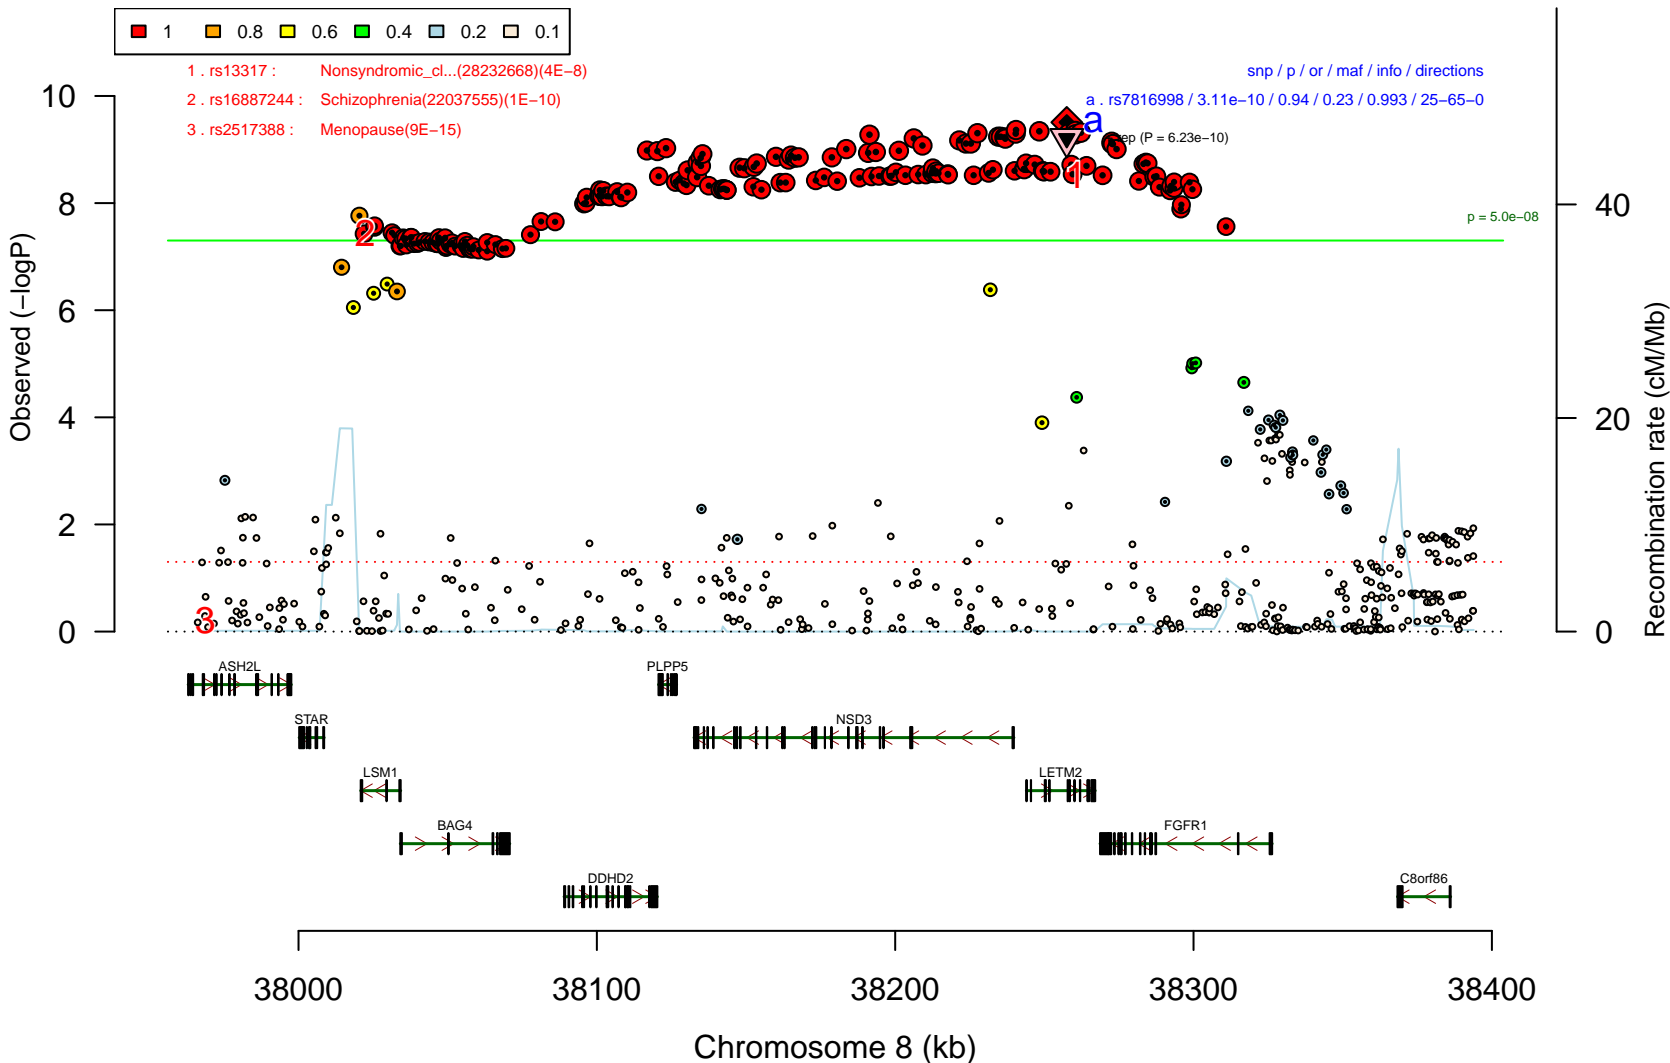



# PGC\_SCZ\_w3\_90\_0418b.chr17

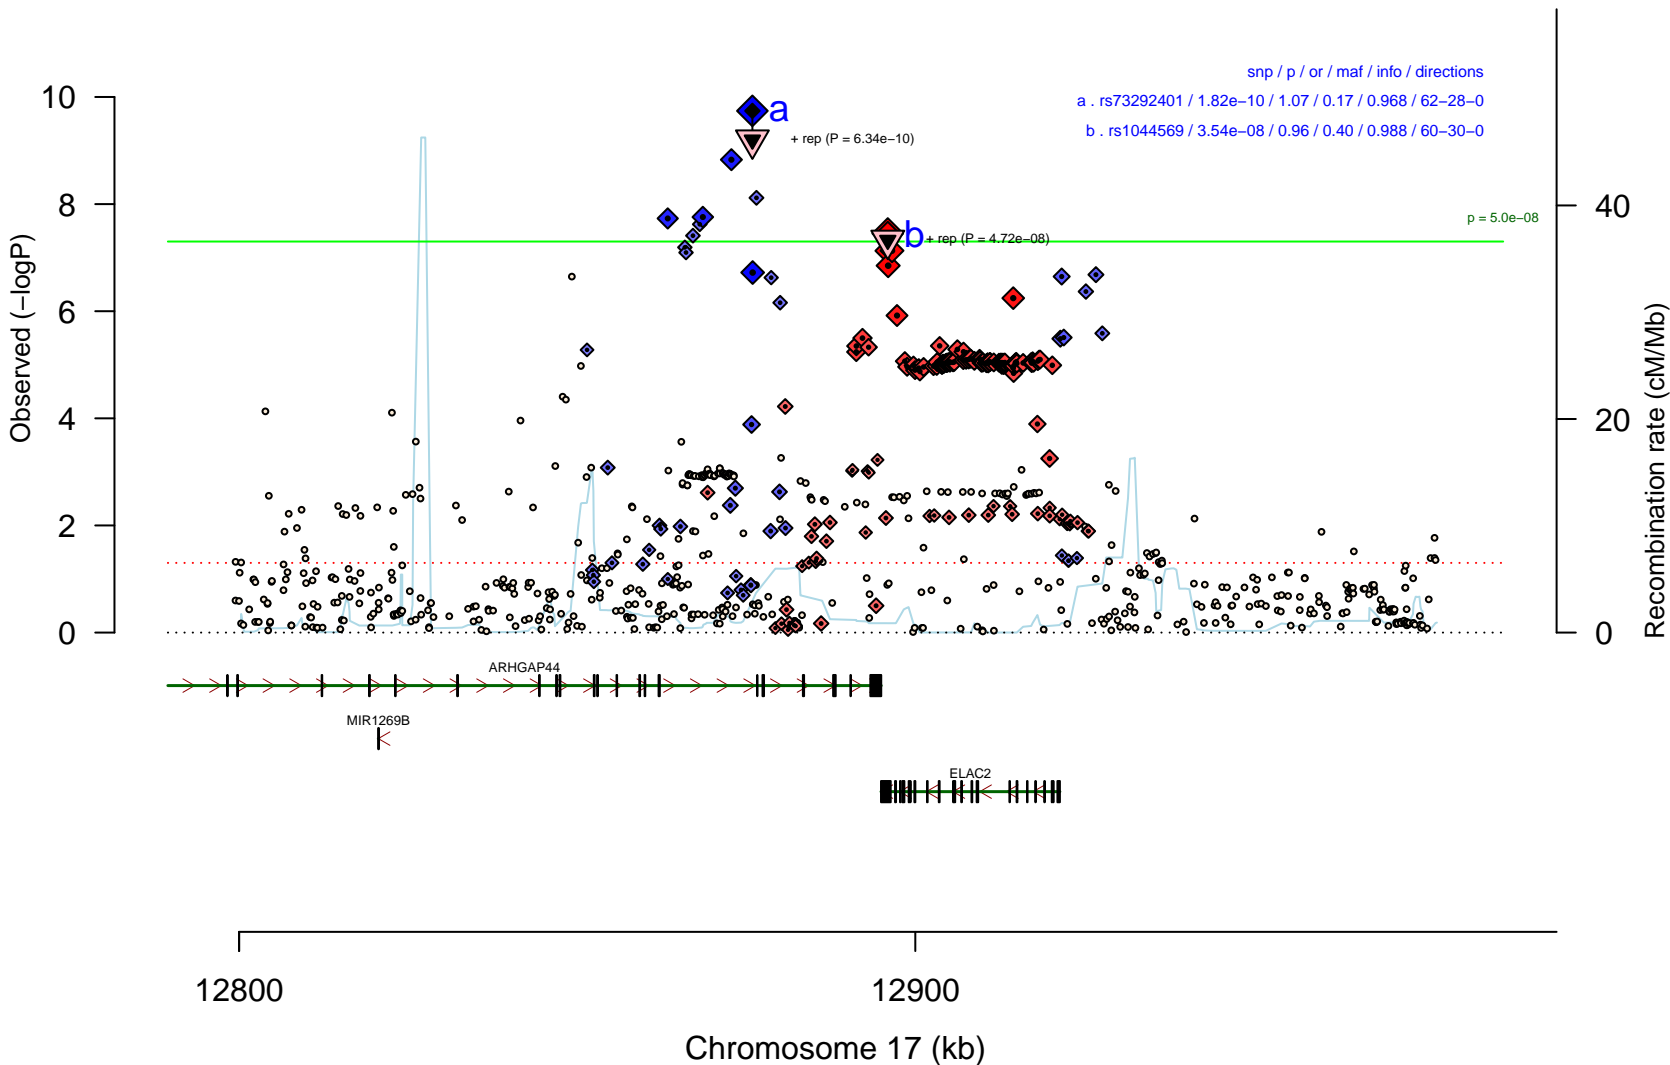

# PGC\_SCZ\_w3\_90\_0418b.83.chr5

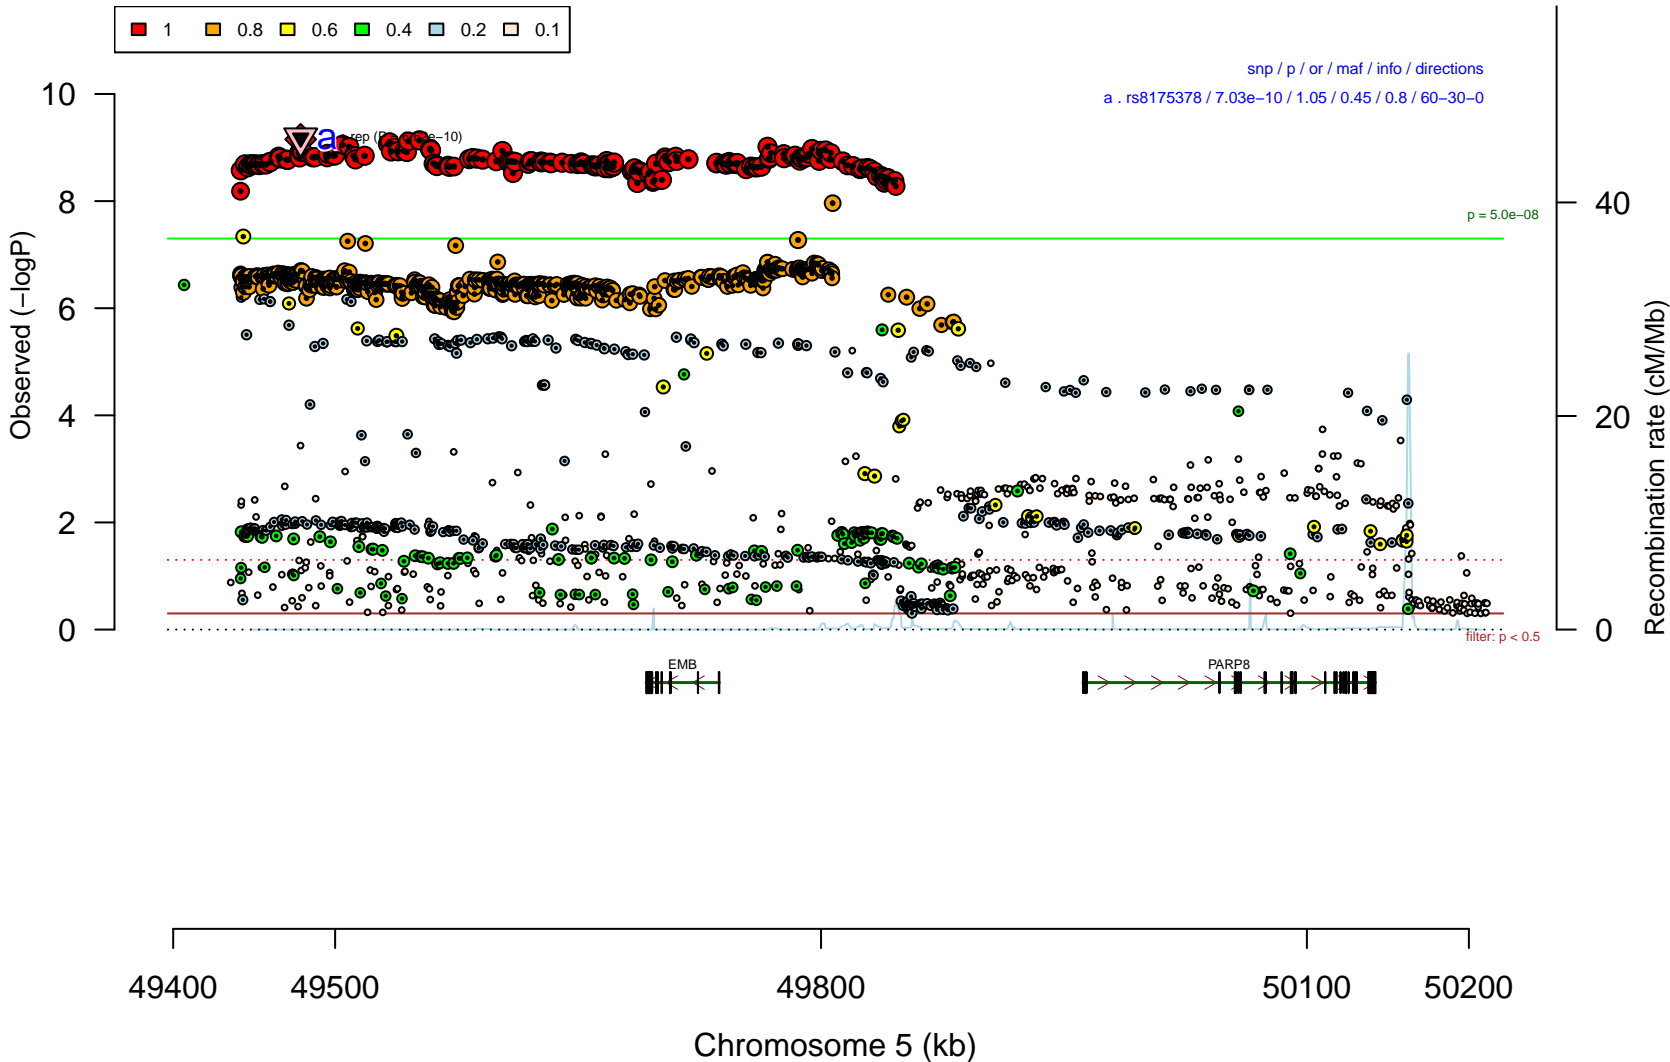

# PGC\_SCZ\_w3\_90\_0418b.59.chr3

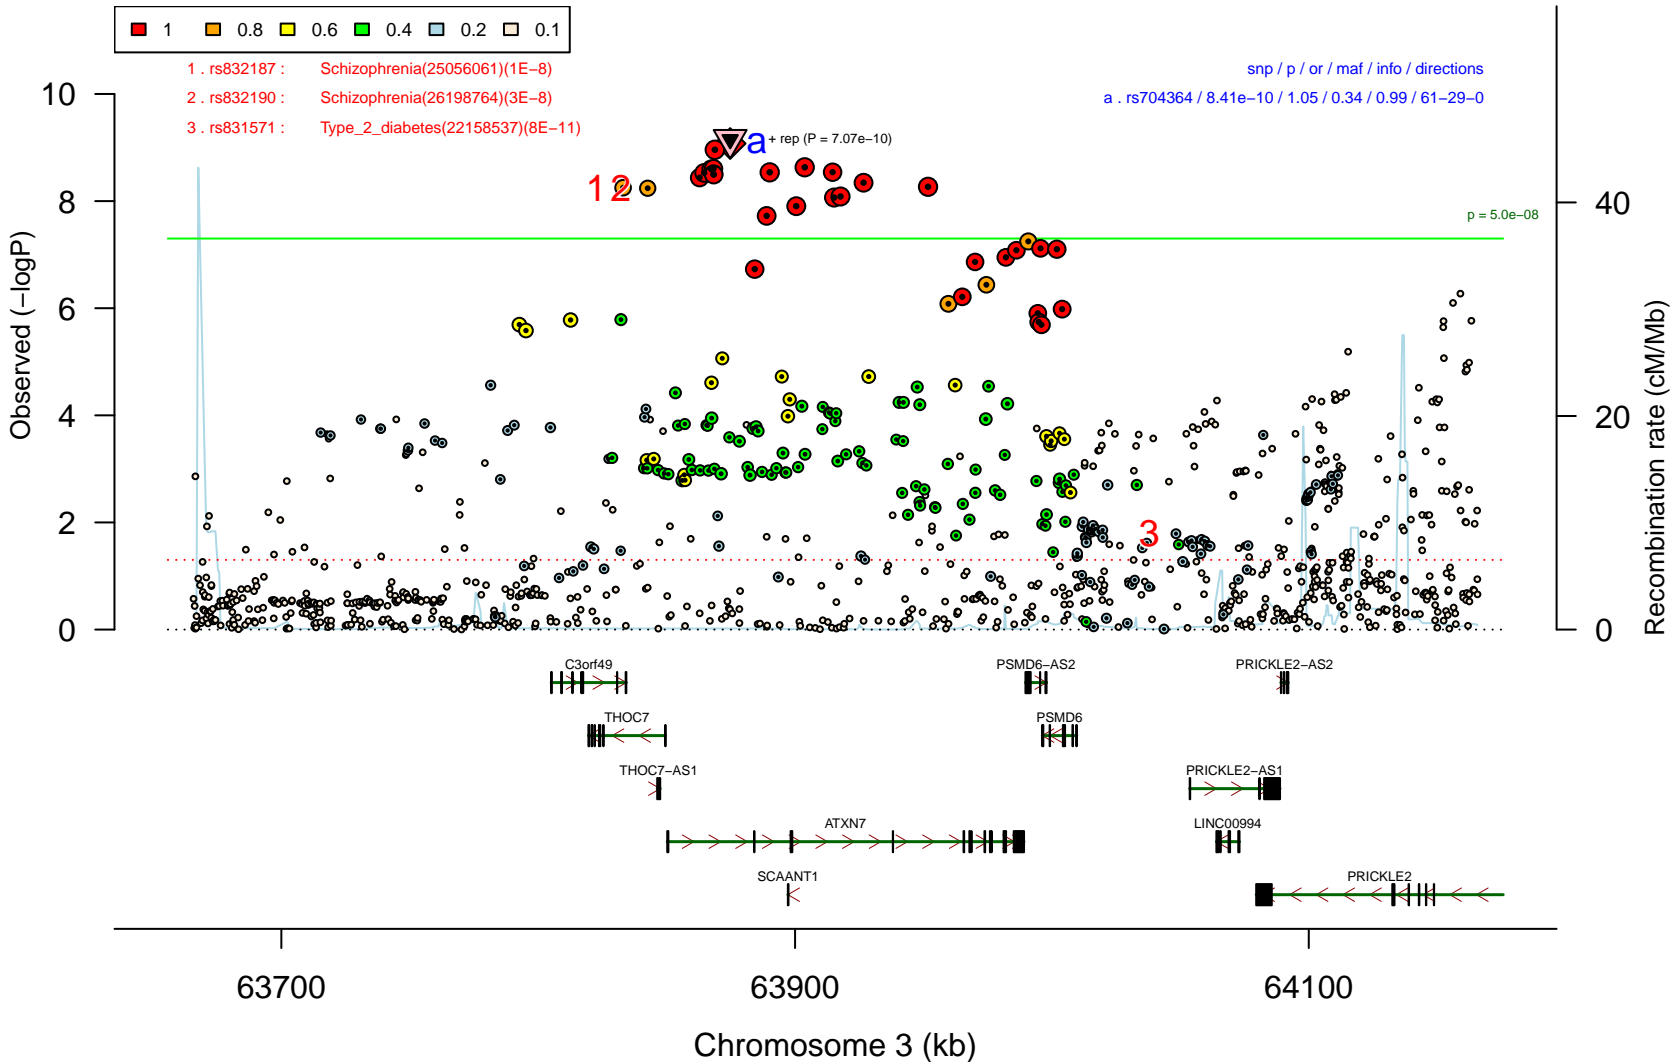

# PGC\_SCZ\_w3\_90\_0418b.234.chr16

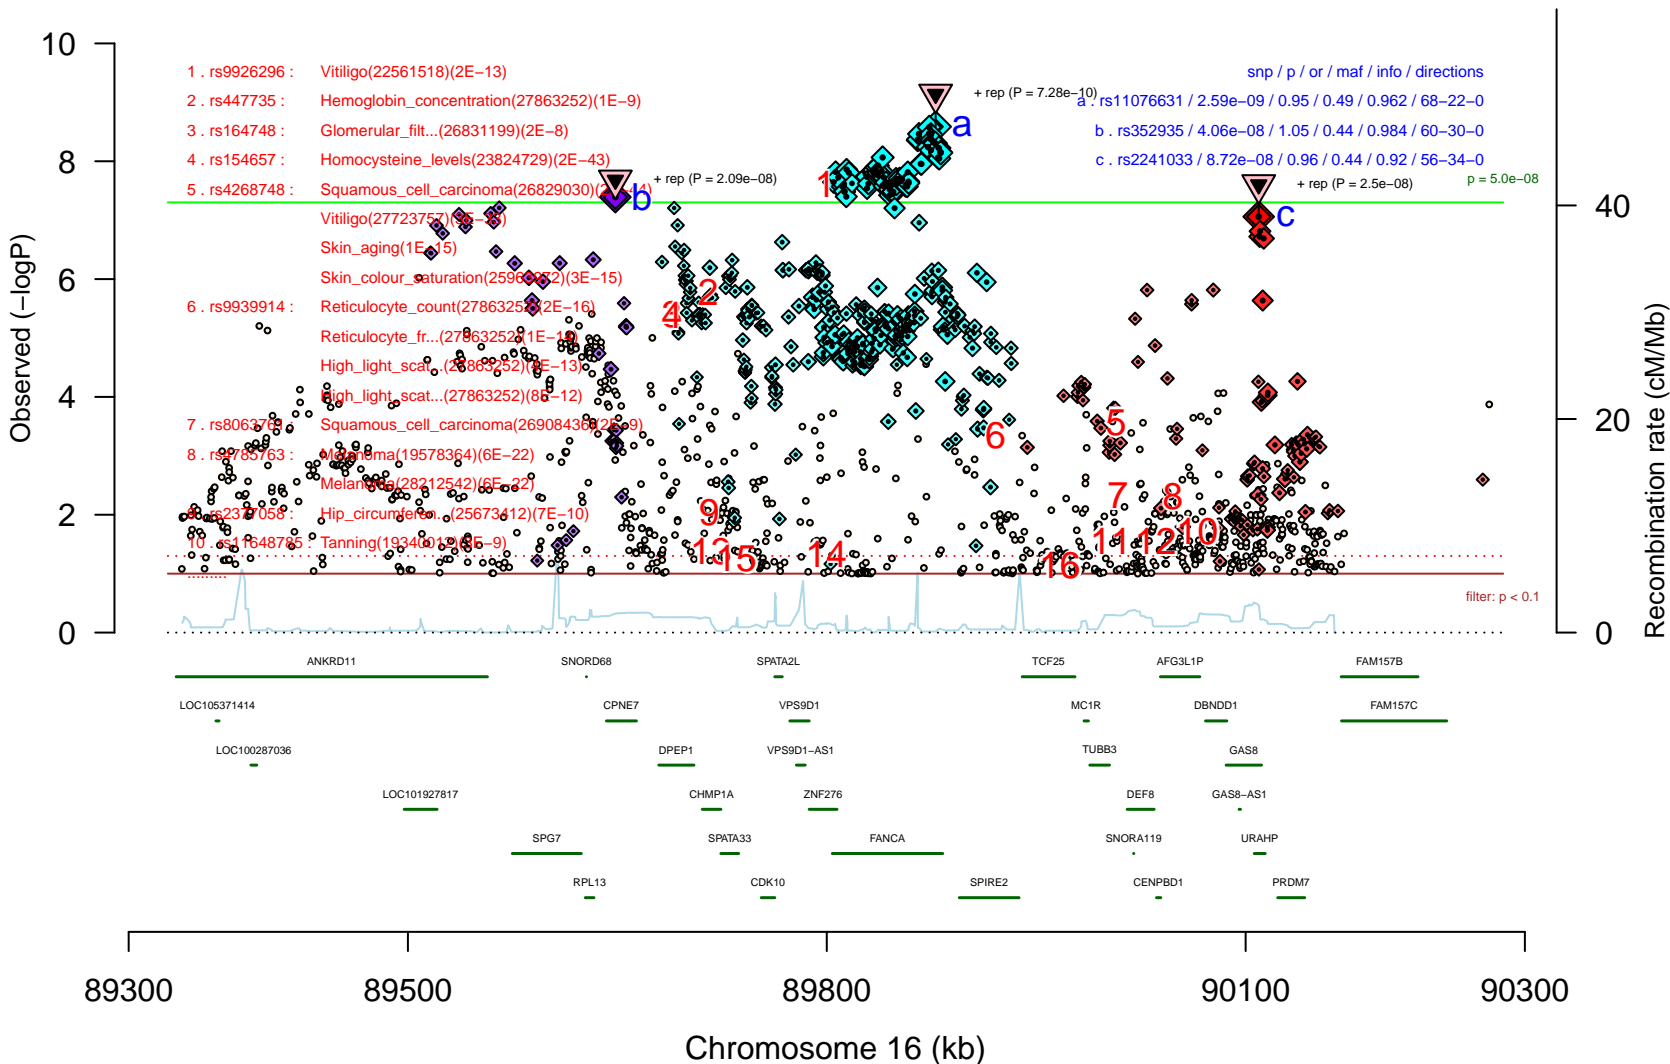

# PGC\_SCZ\_w3\_90\_0418b.242.chr17

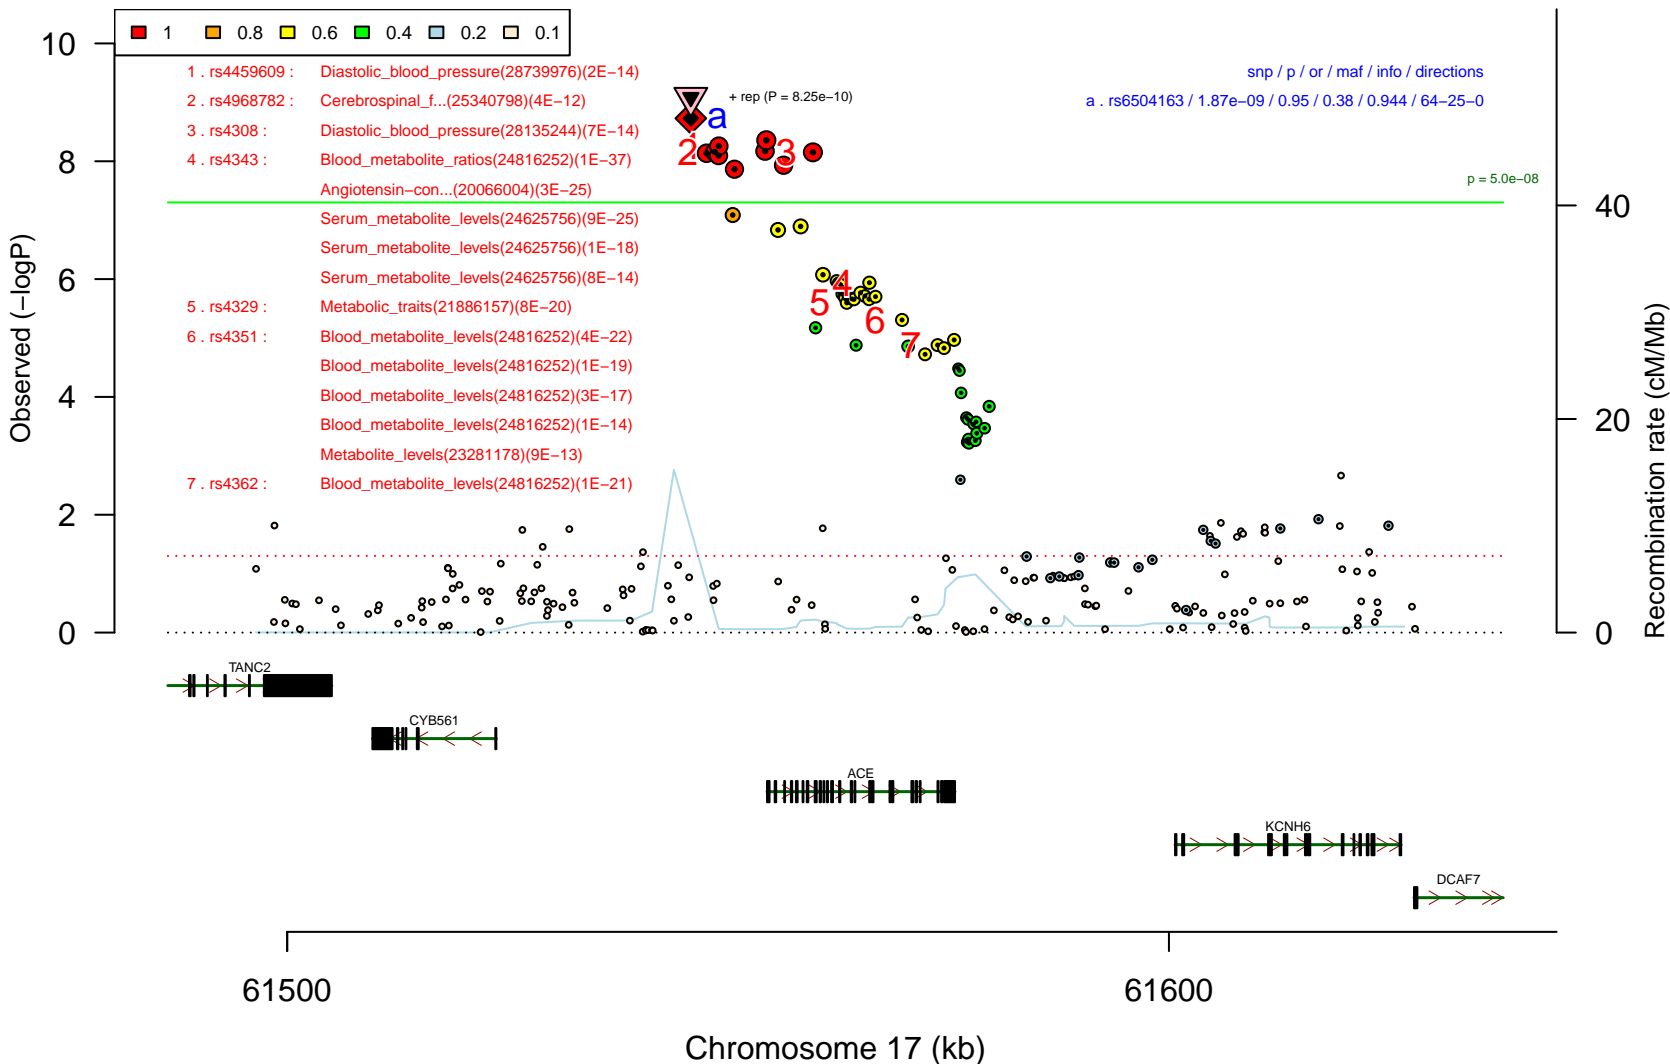

# PGC\_SCZ\_w3\_90\_0418b.20.chr1

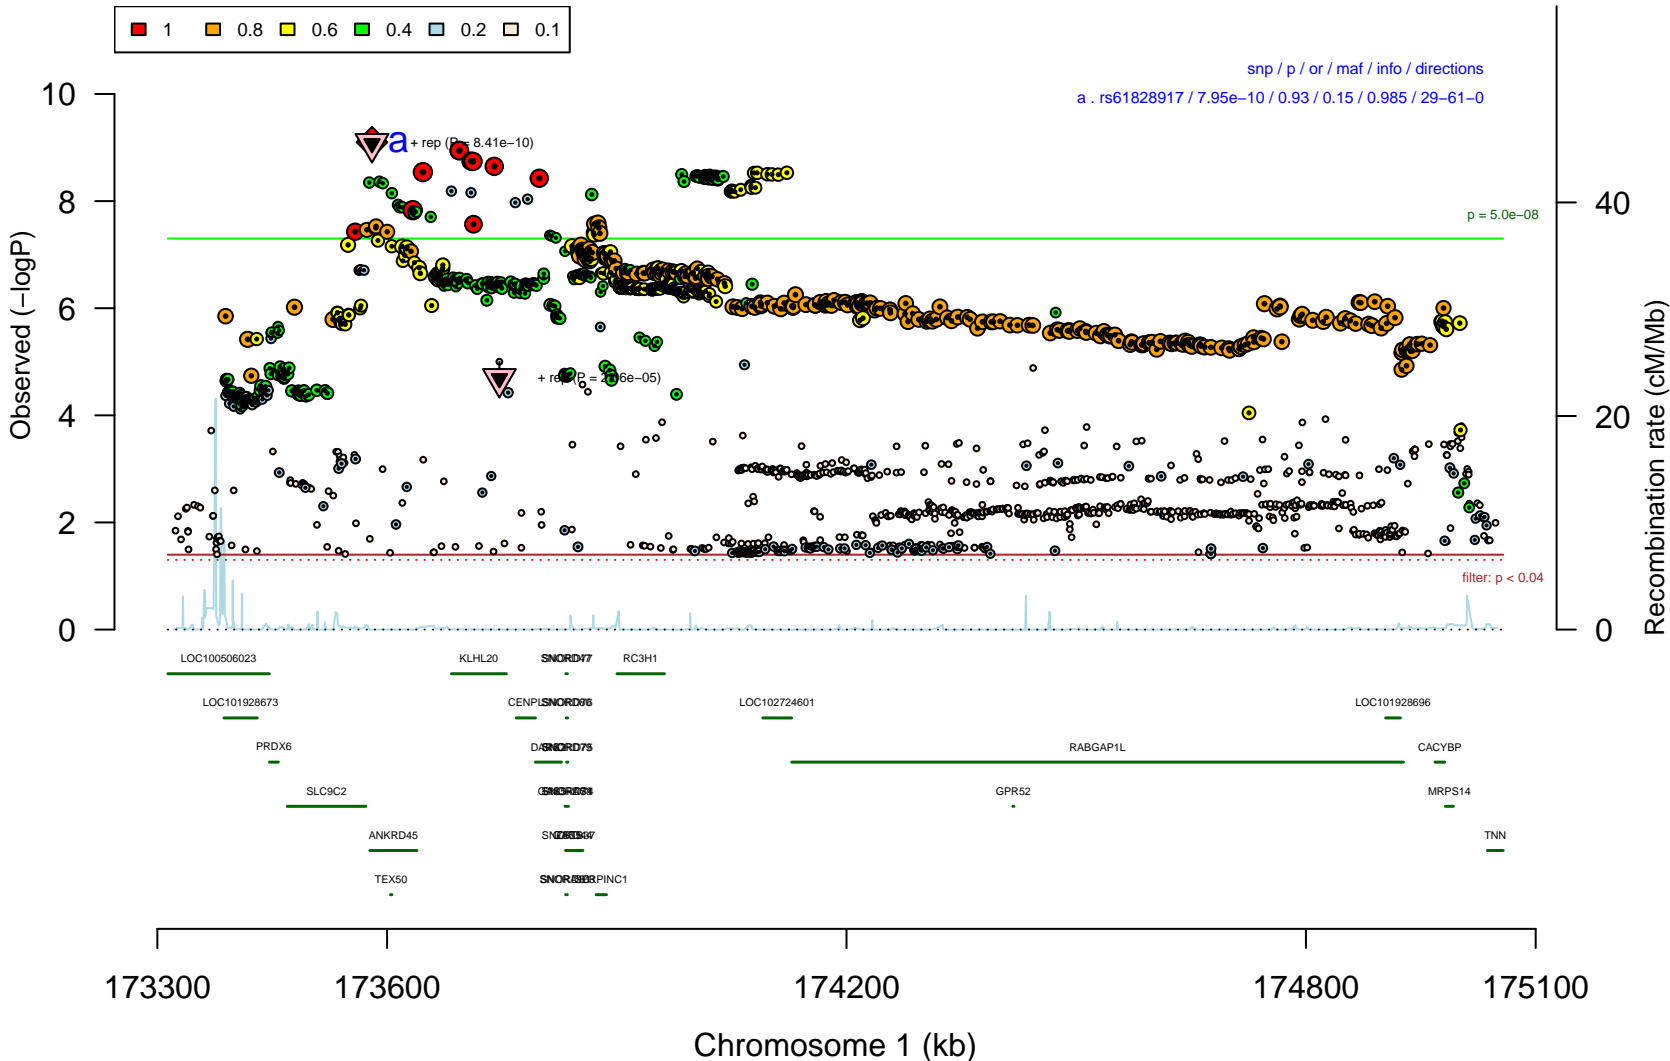

# PGC\_SCZ\_w3\_90\_0418b.84.chr5

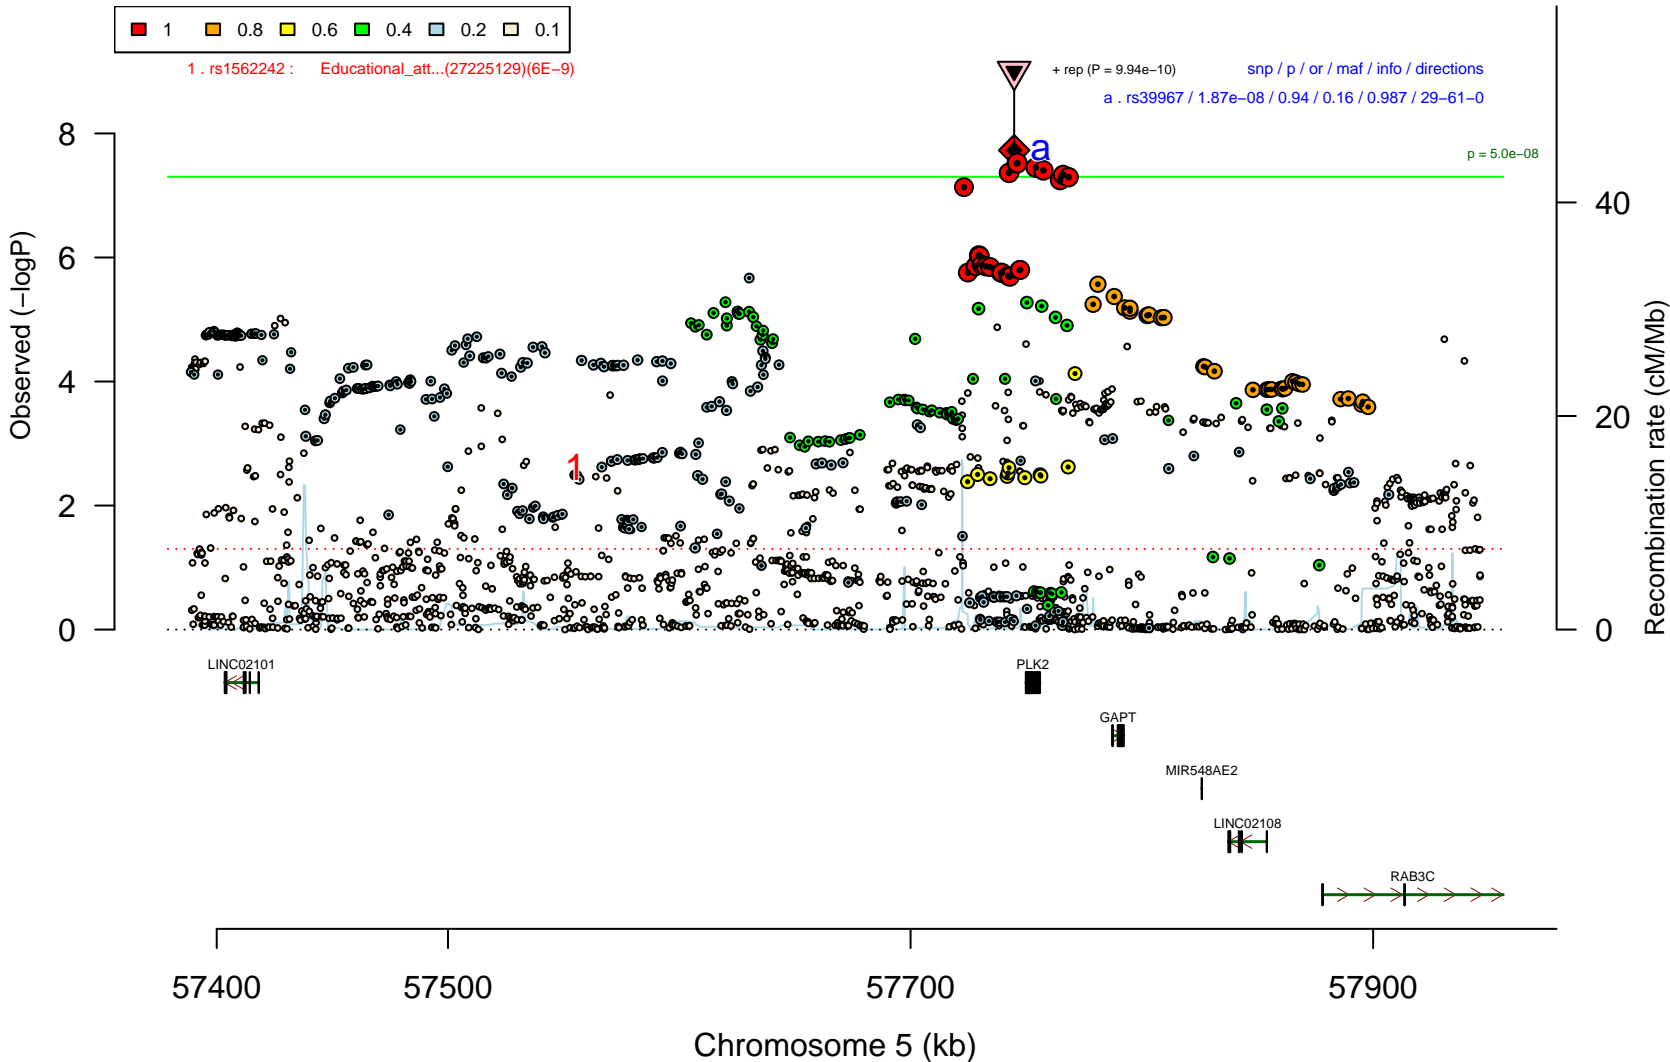

# PGC\_SCZ\_w3\_90\_0418b.204.chr13

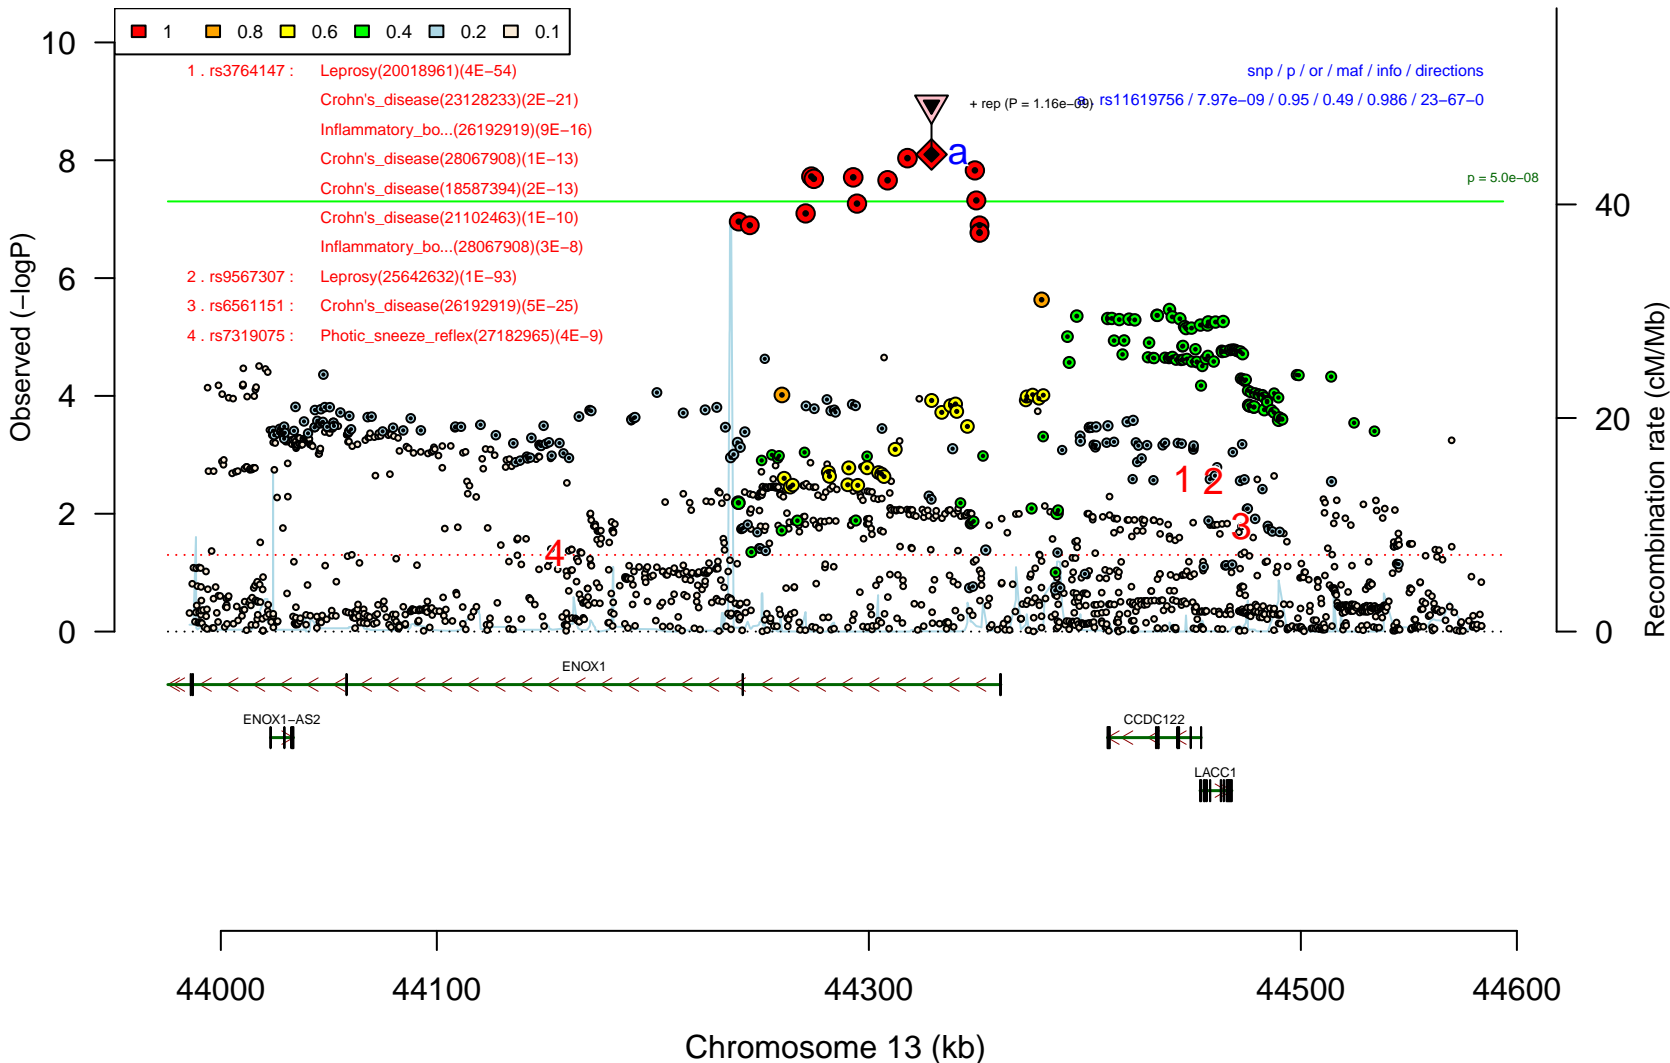



# PGC\_SCZ\_w3\_90\_0418b.210.chr14

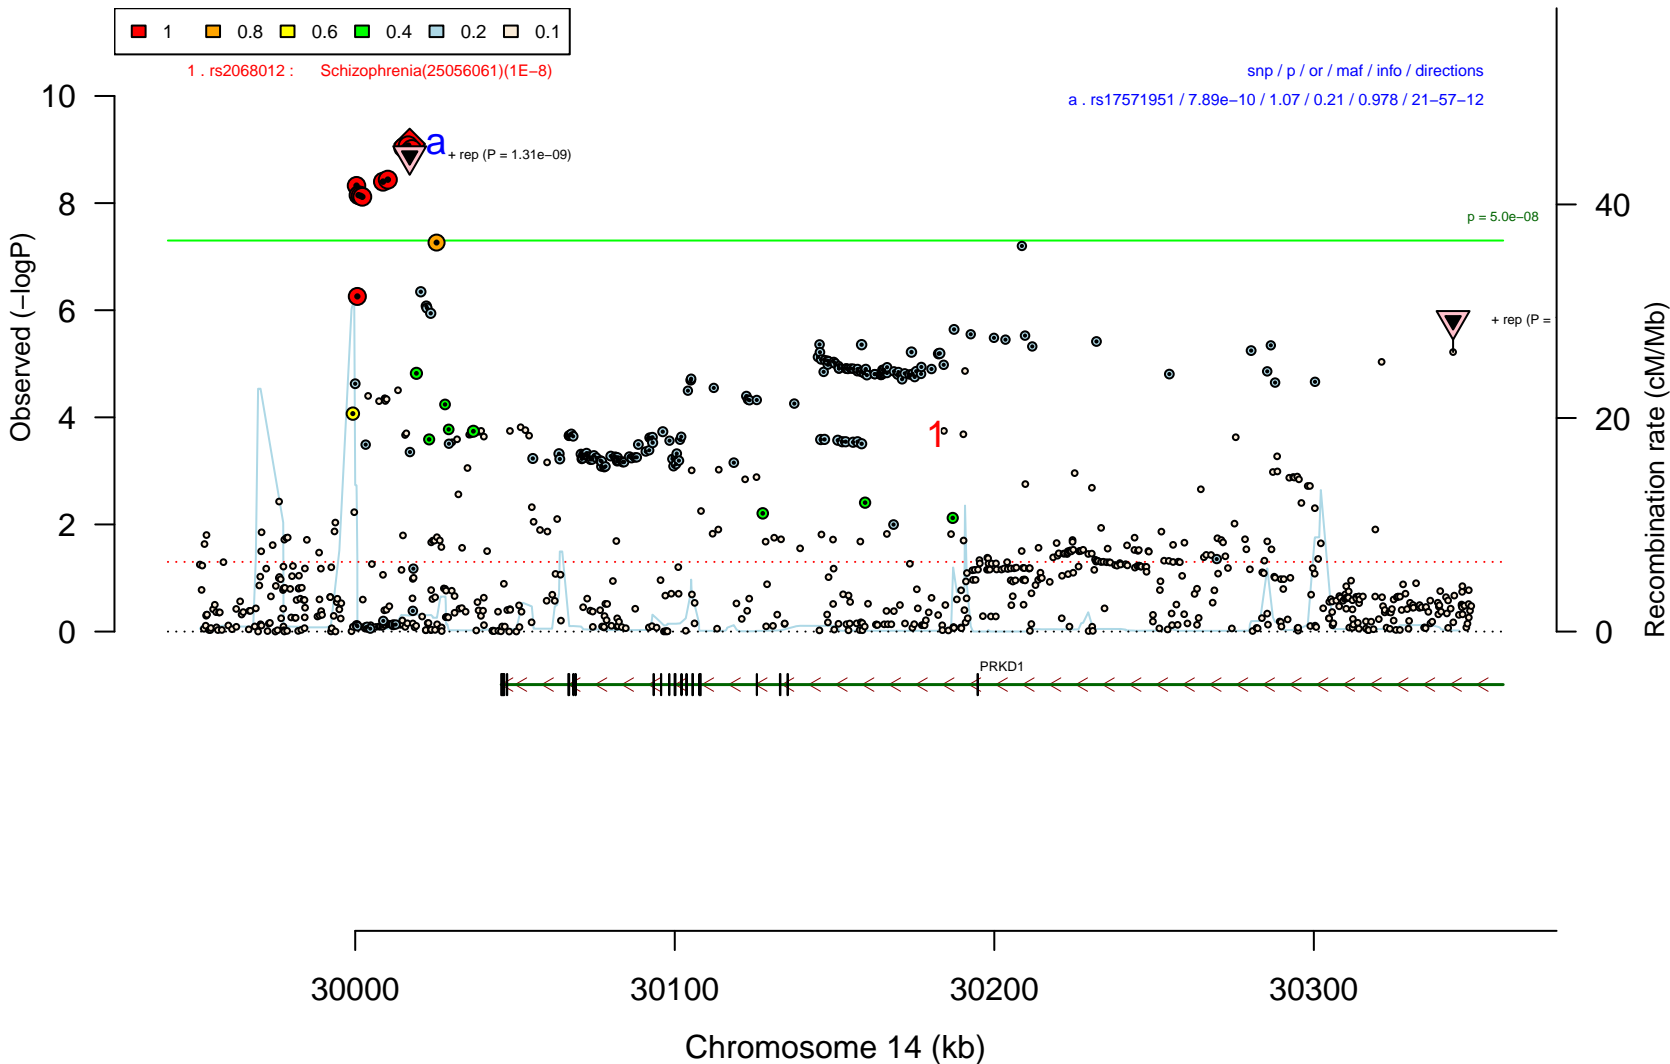

PGC SCZ w3 90 0418b.118.chr7

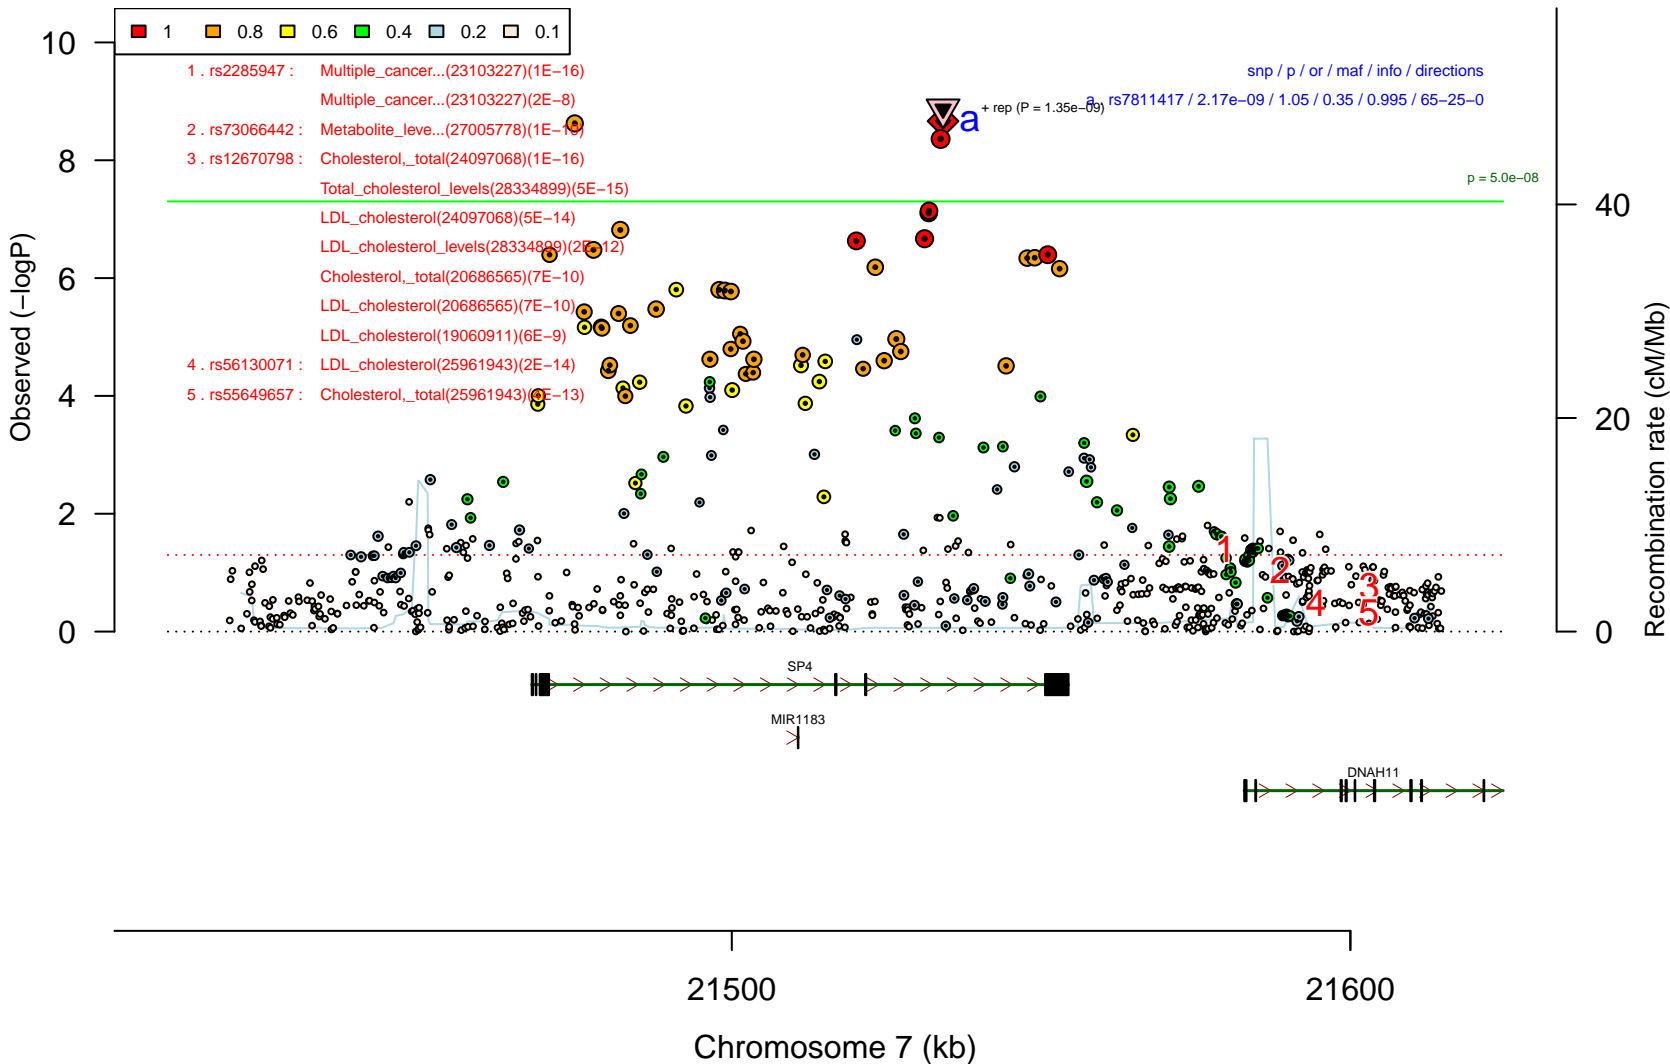

# PGC\_SCZ\_w3\_90\_0418b.72.chr4

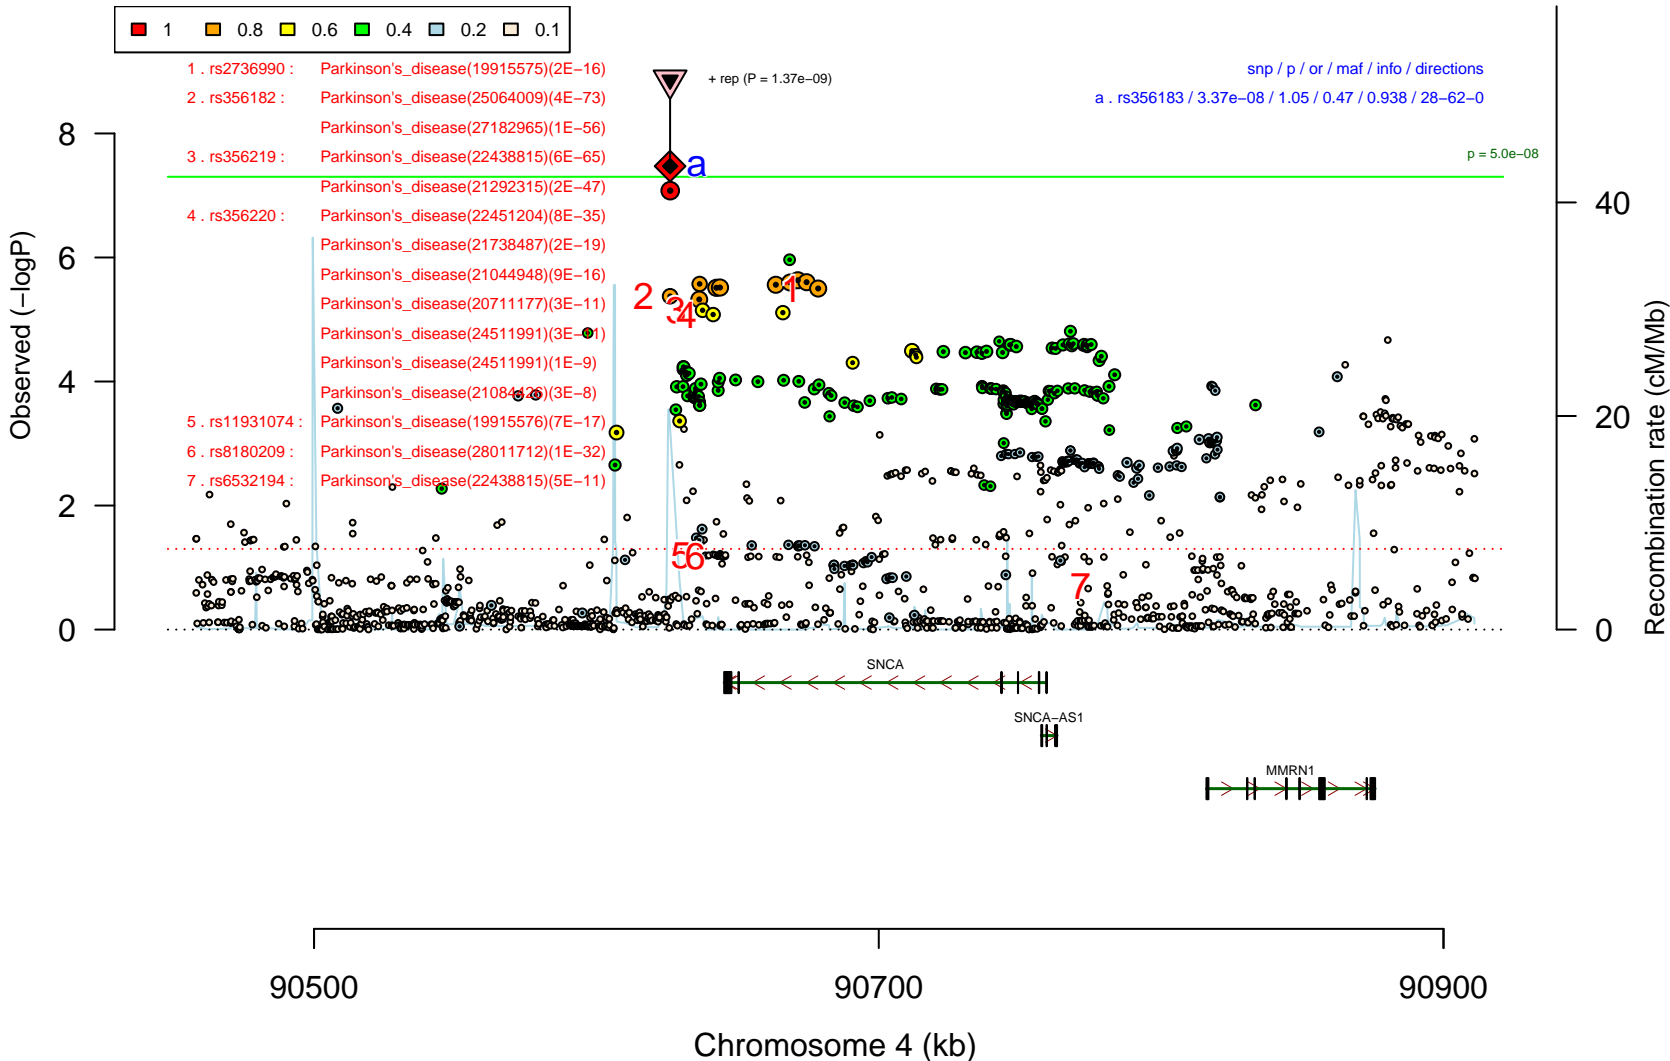

# PGC\_SCZ\_w3\_90\_0418b.114.chr6

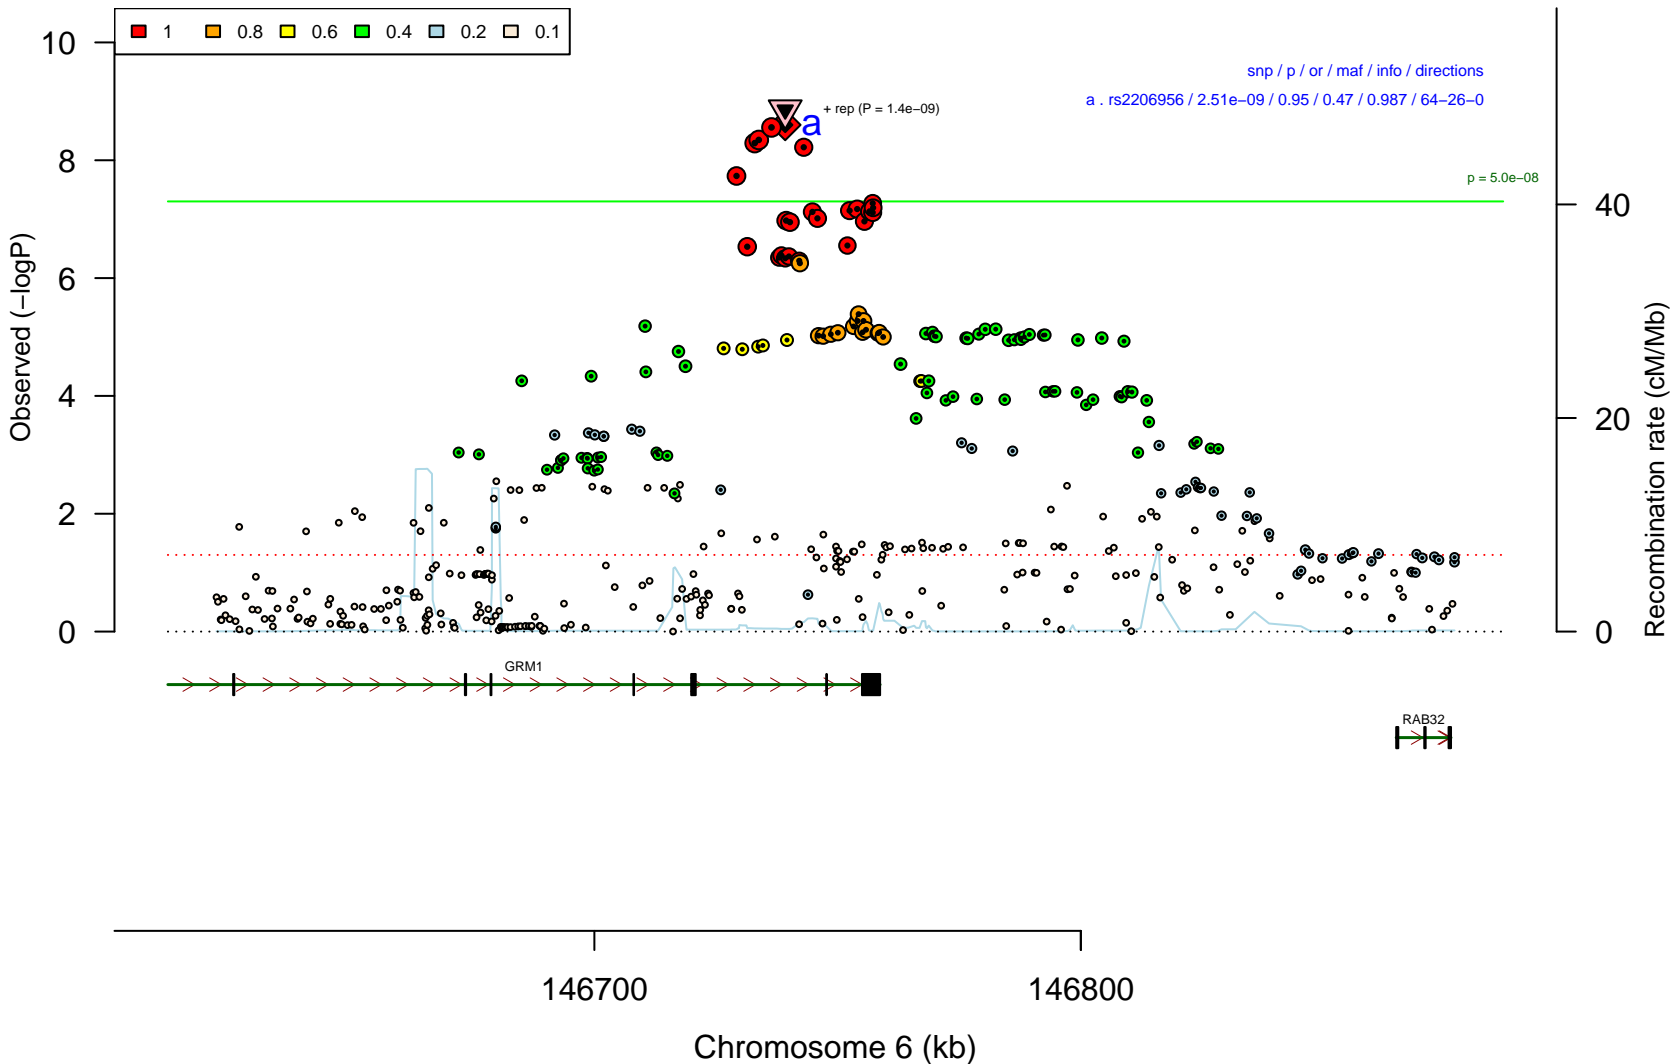

# PGC\_SCZ\_w3\_90\_0418b.199.chr12

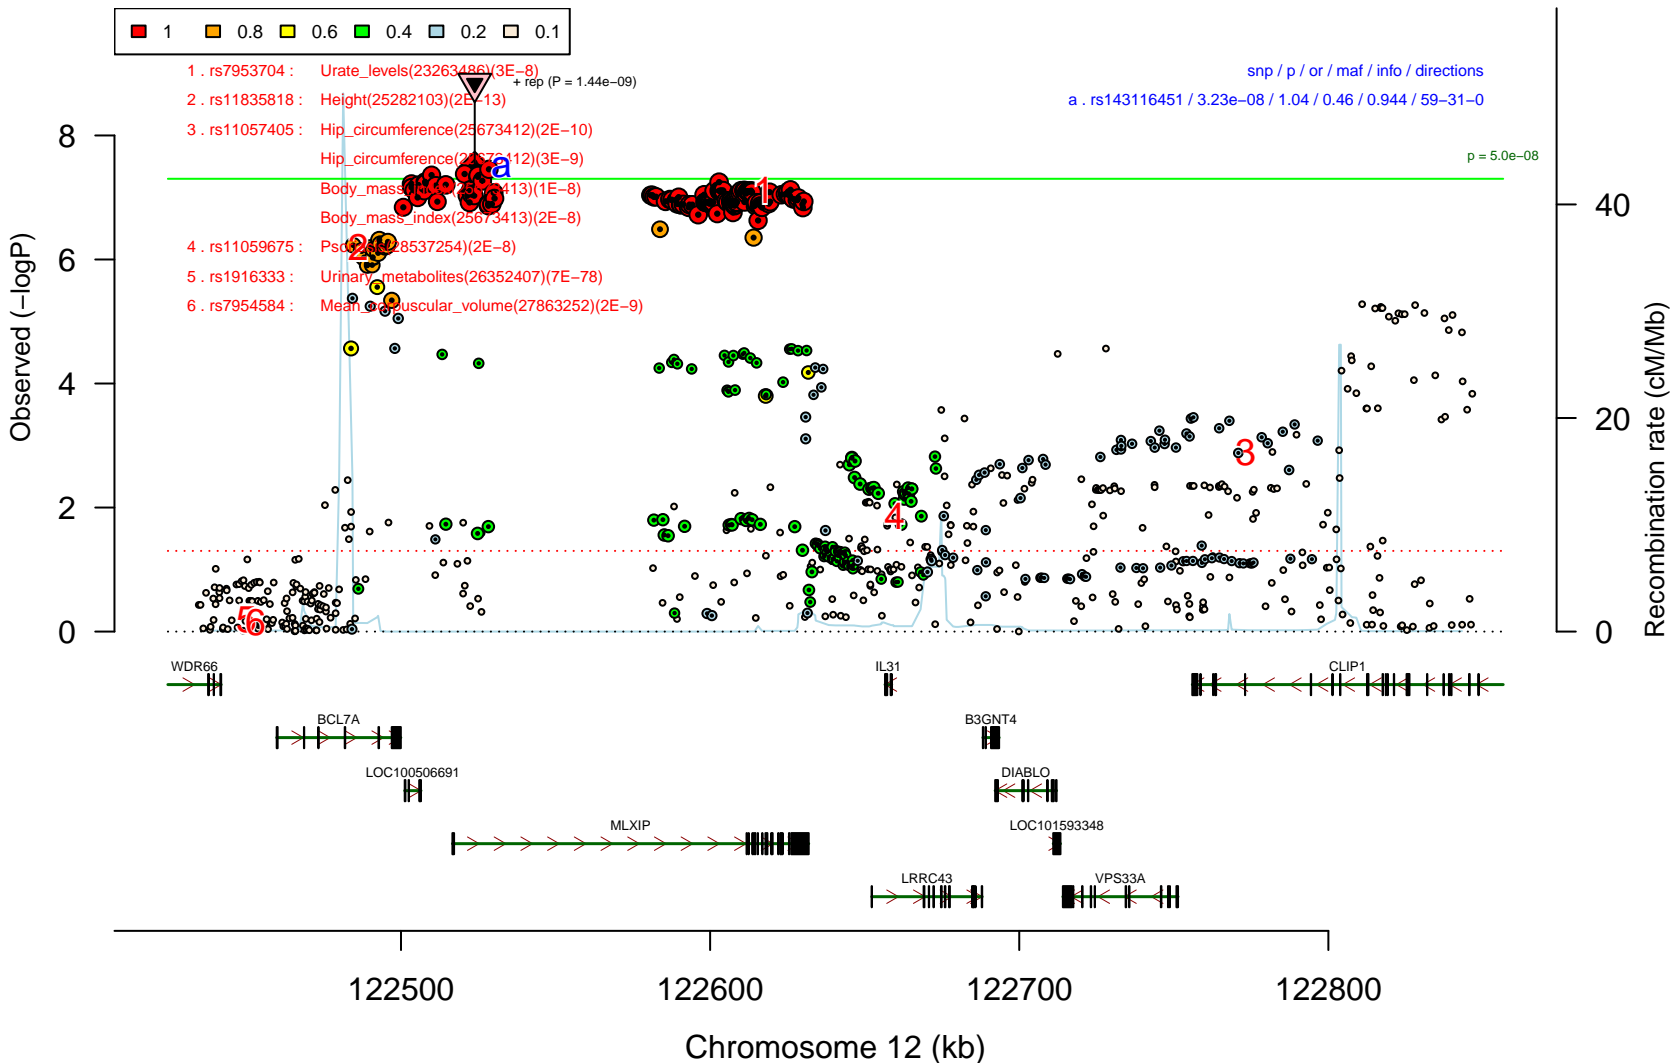

# PGC\_SCZ\_w3\_90\_0418b.6.chr1

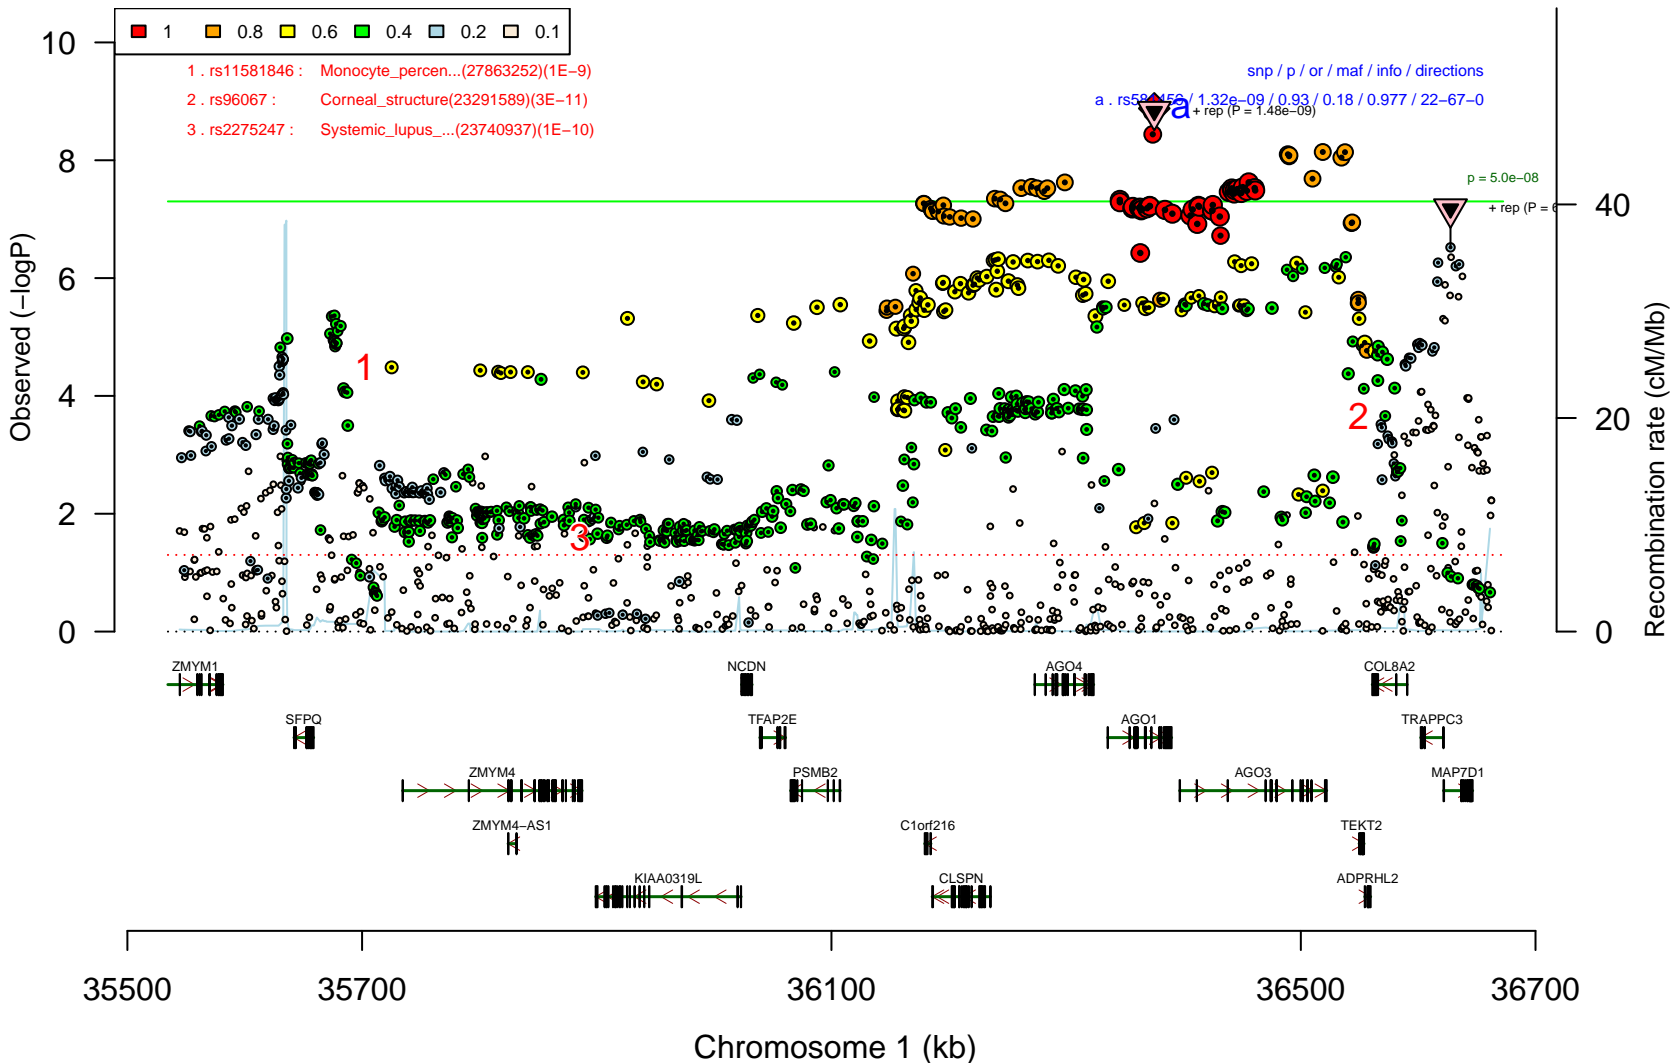

# PGC\_SCZ\_w3\_90\_0418b.172.chr11

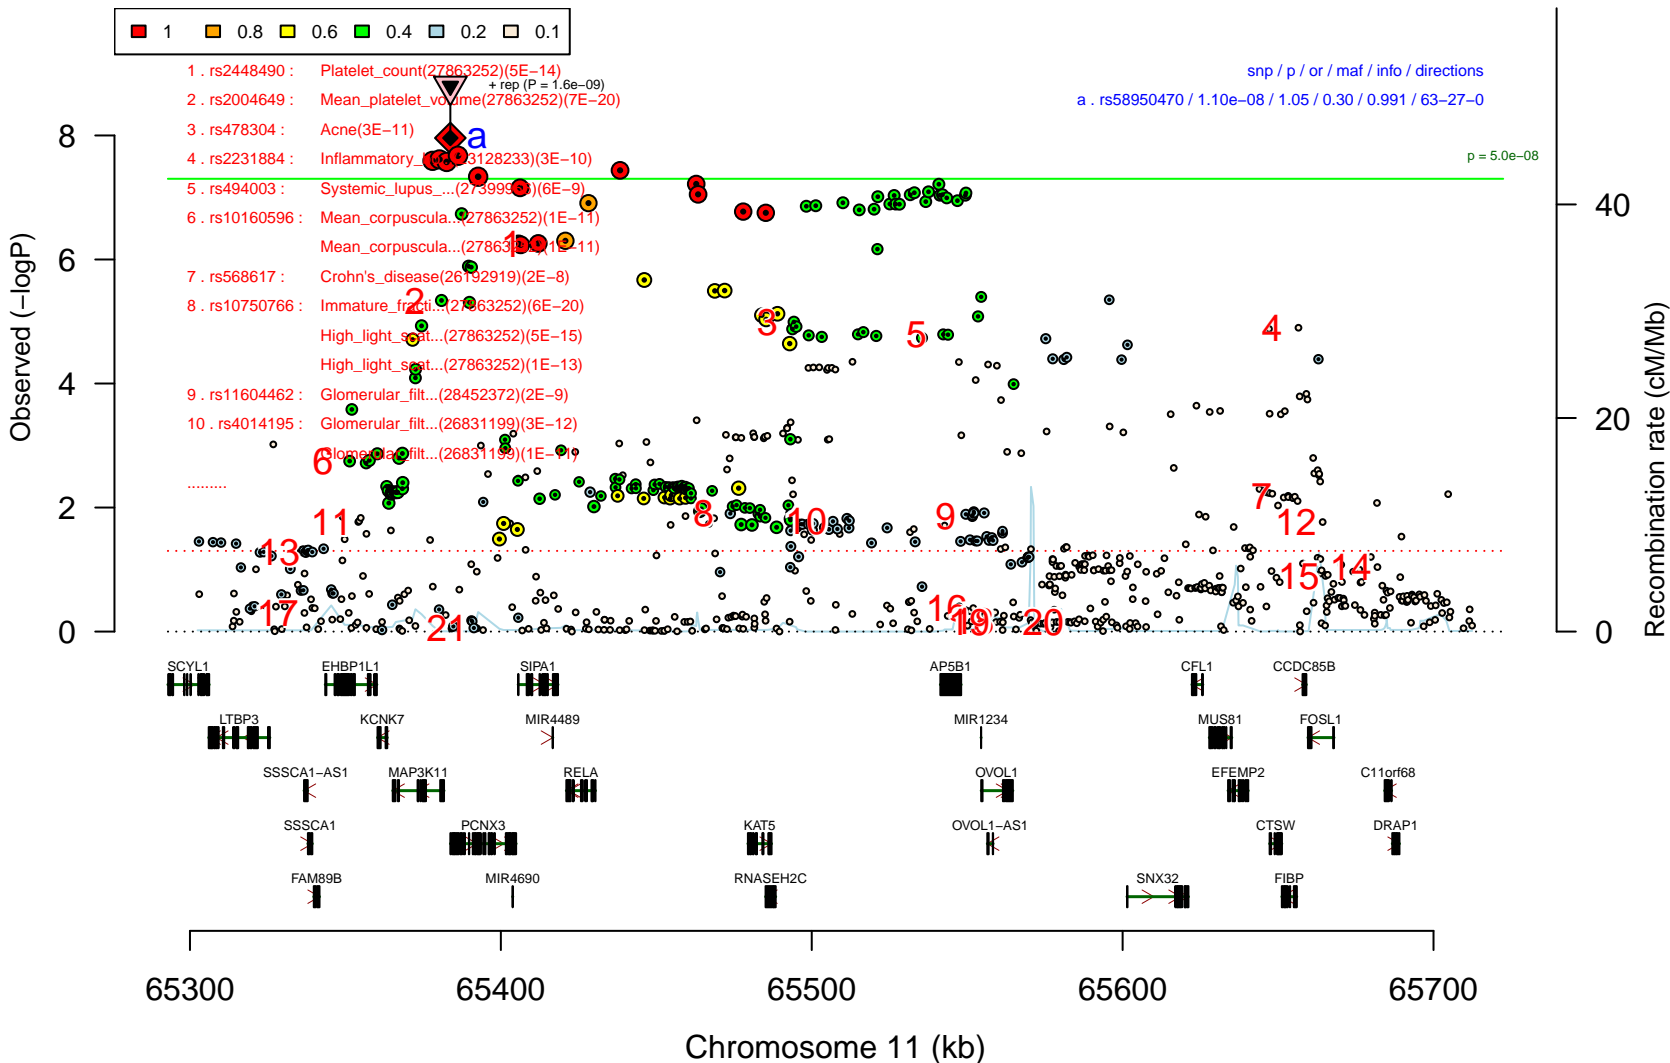

# PGC\_SCZ\_w3\_90\_0418b.260.chr21

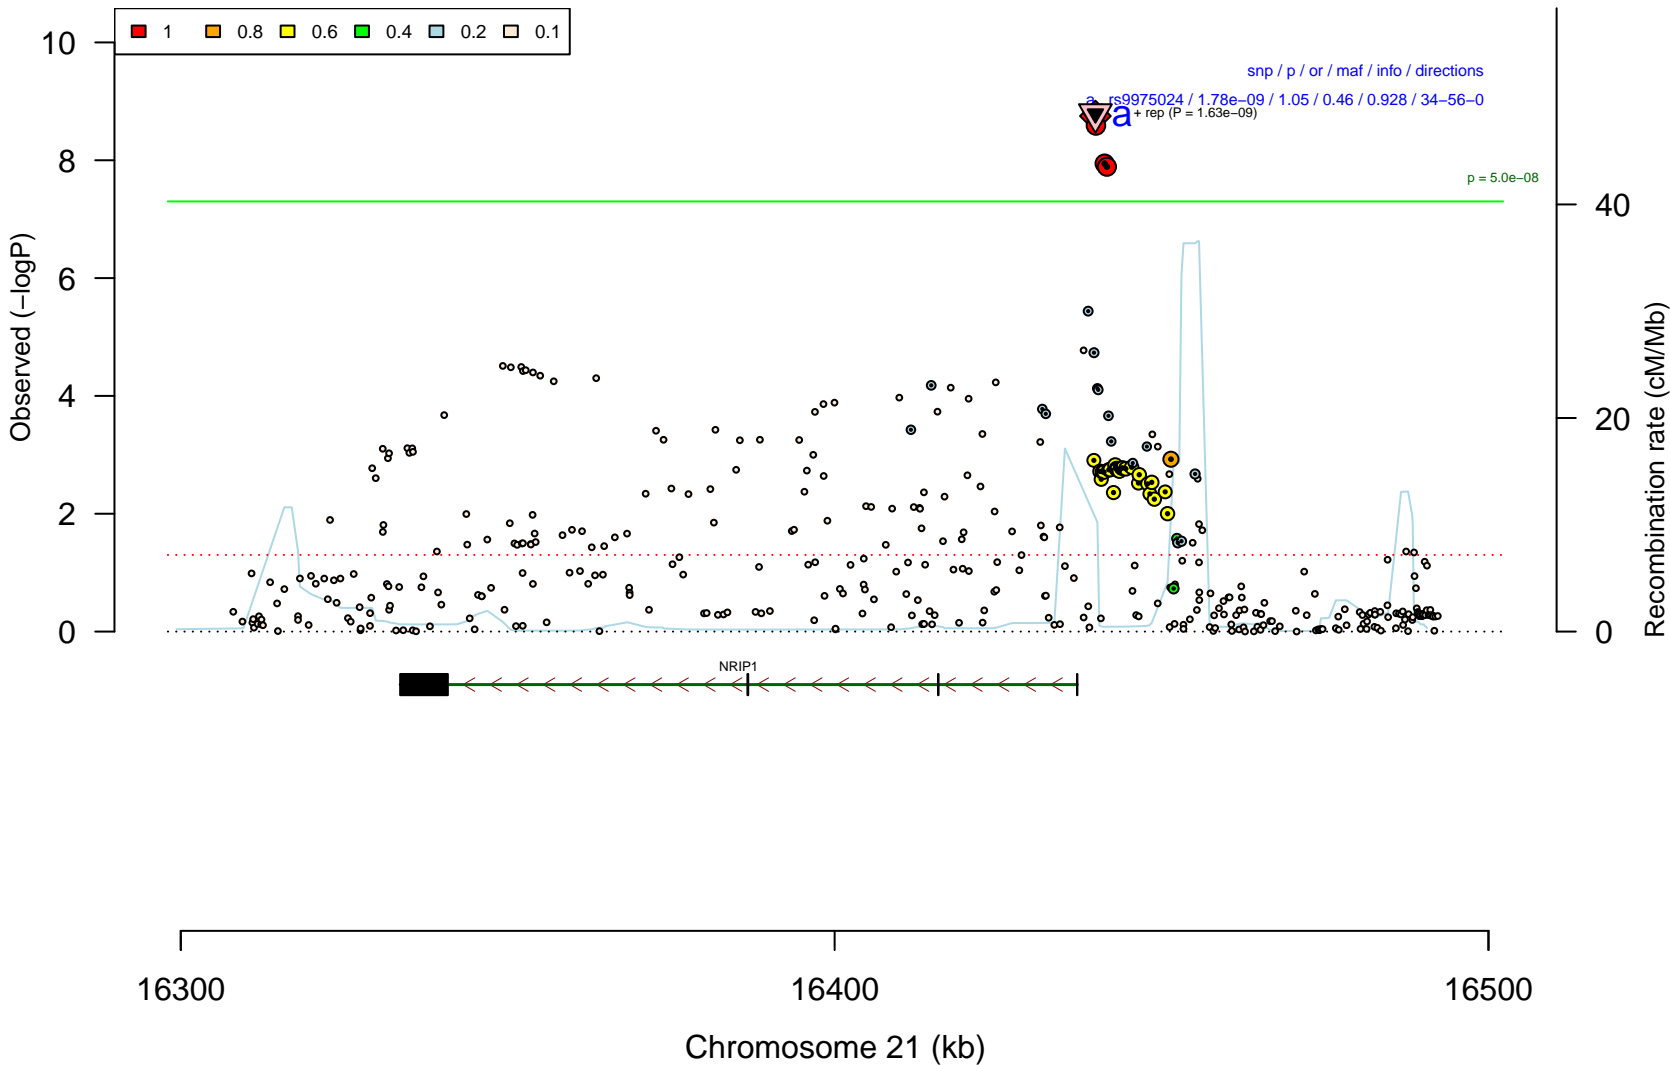



**PGC\_SCZ\_w3\_90\_0418b.58.chr3**

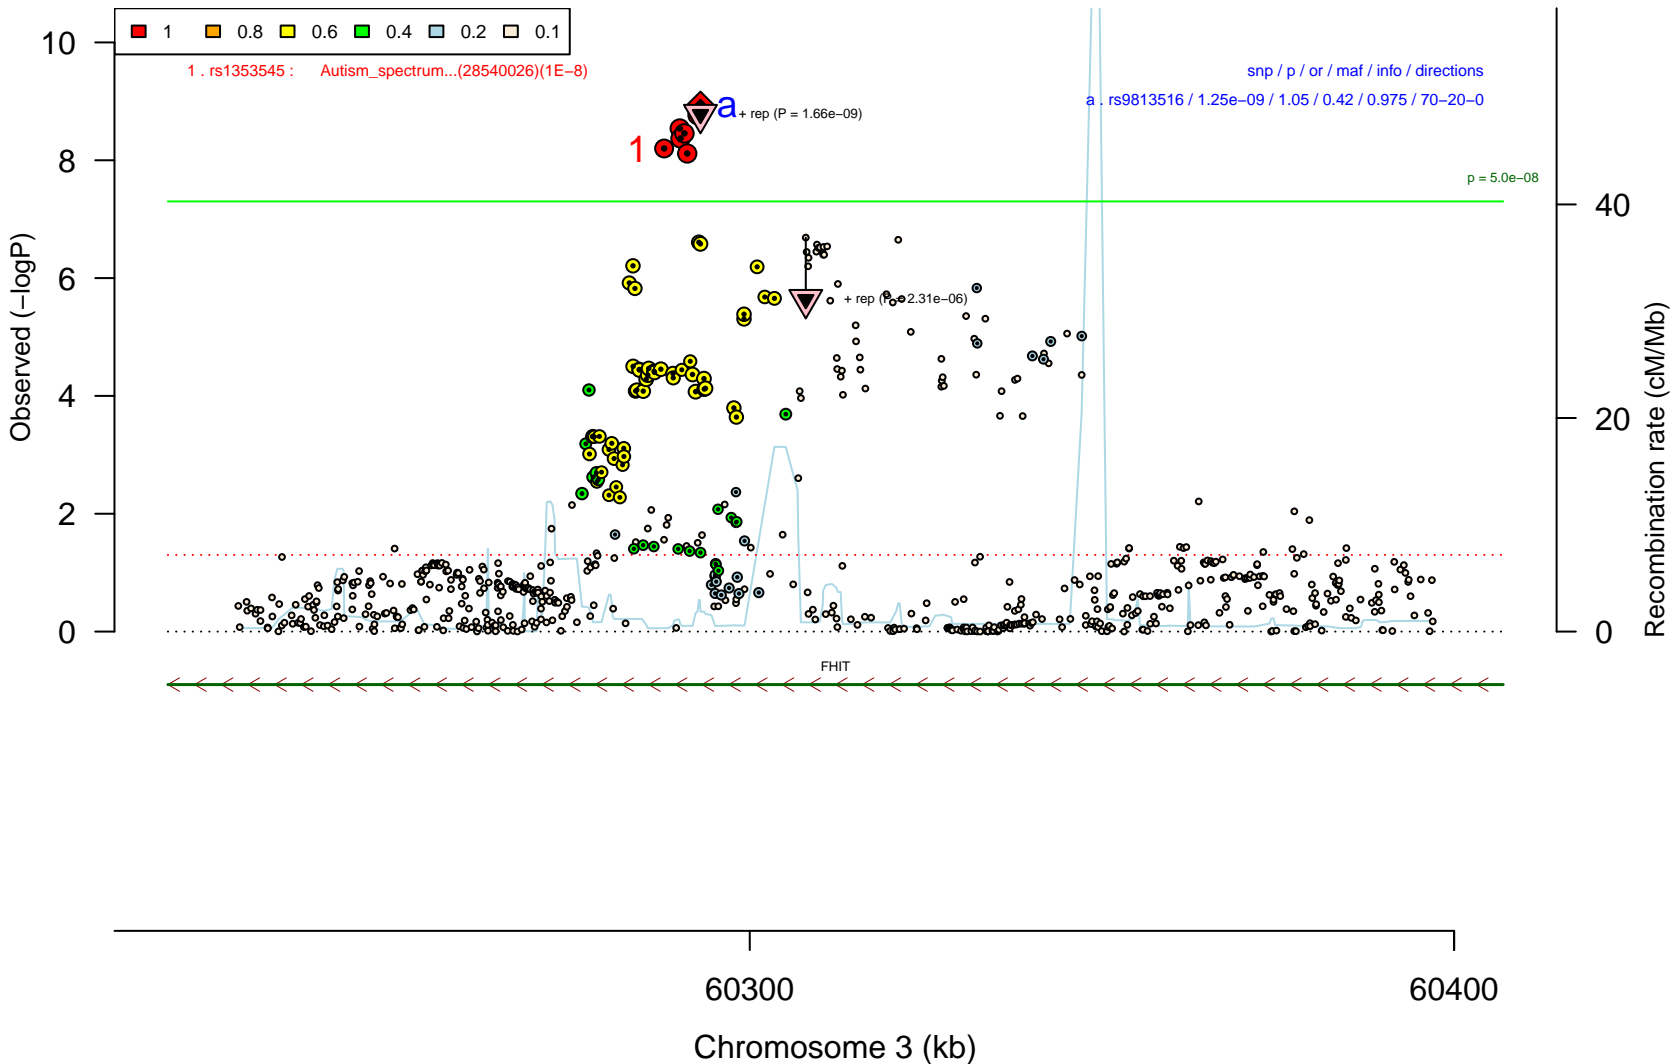

# PGC\_SCZ\_w3\_90\_0418b.145.chr8

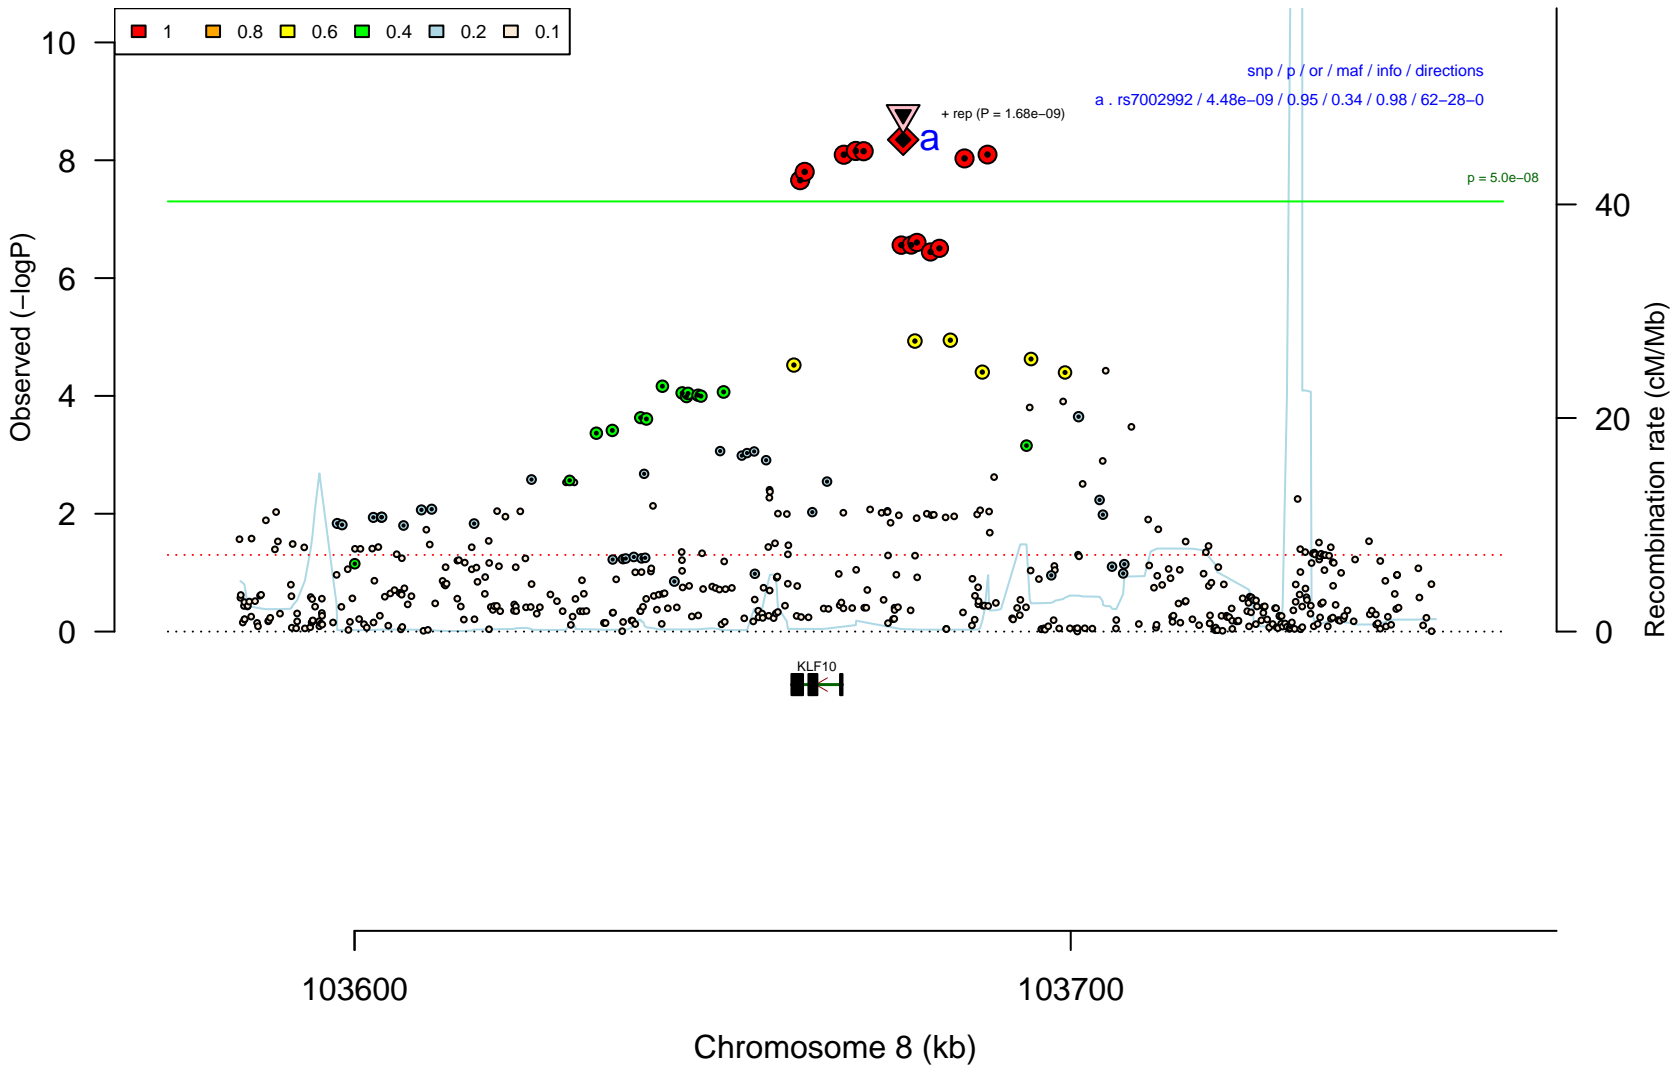

# PGC\_SCZ\_w3\_90\_0418b.215.chr14

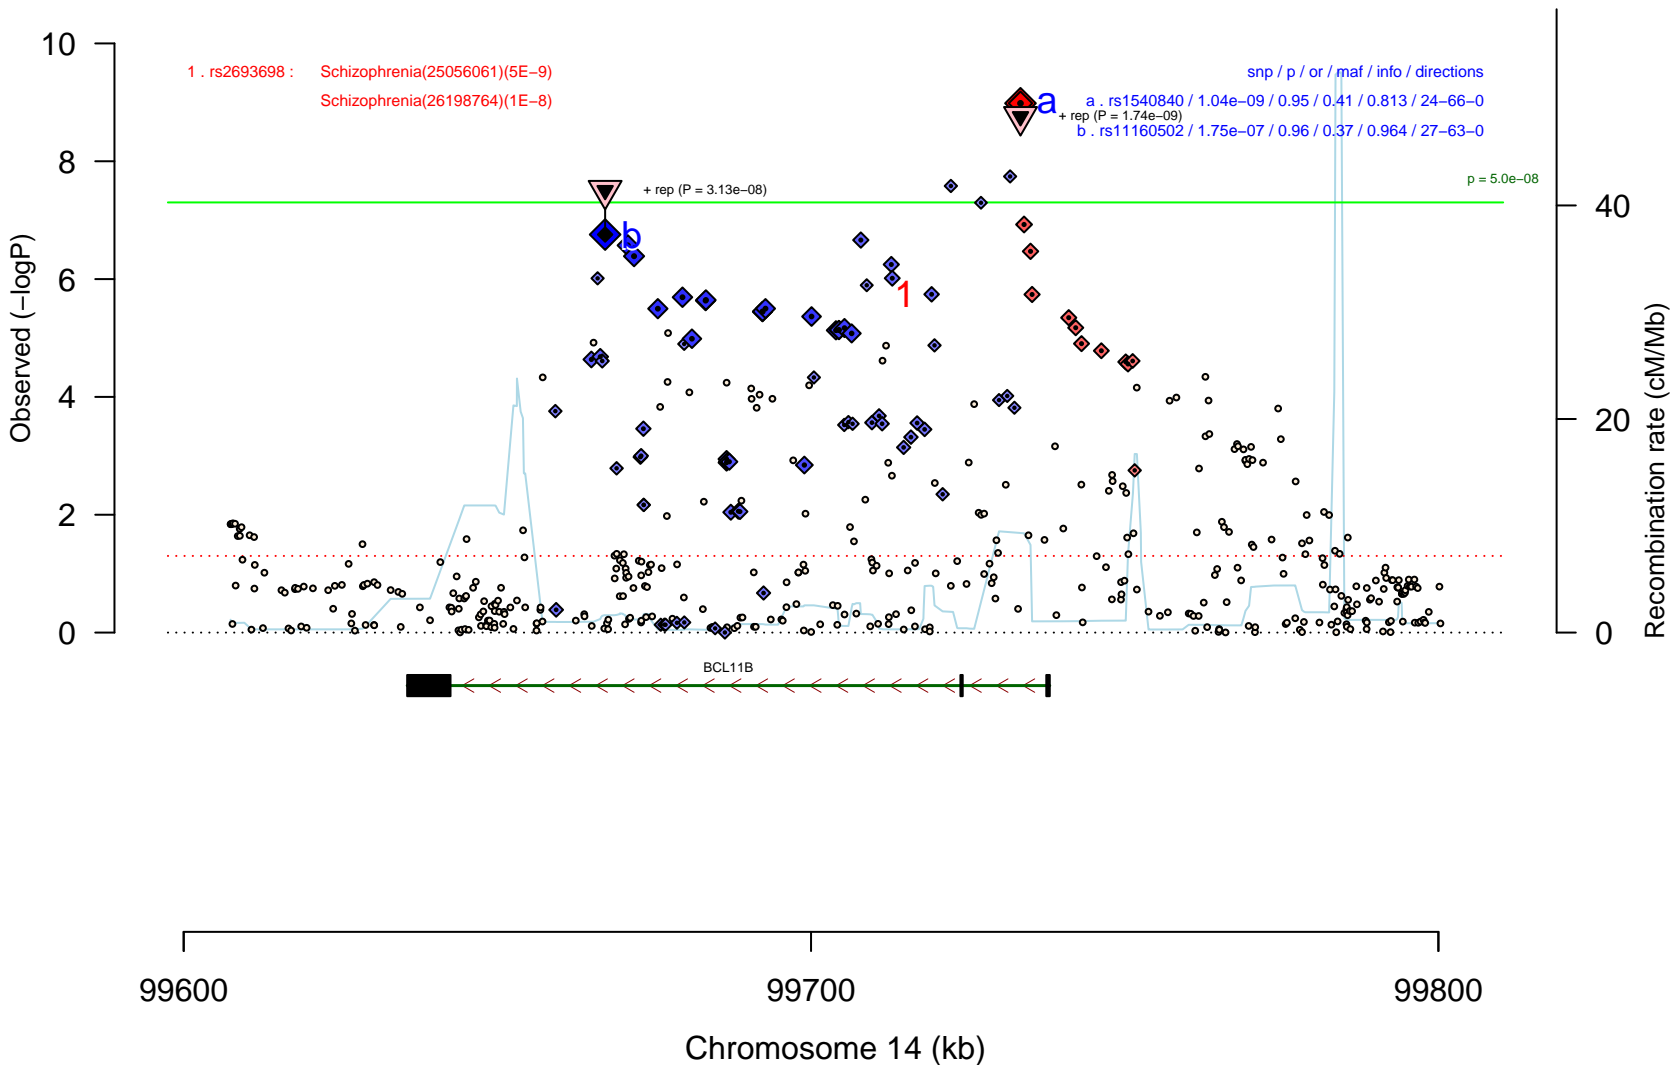

# PGC\_SCZ\_w3\_90\_0418b.87.chr5

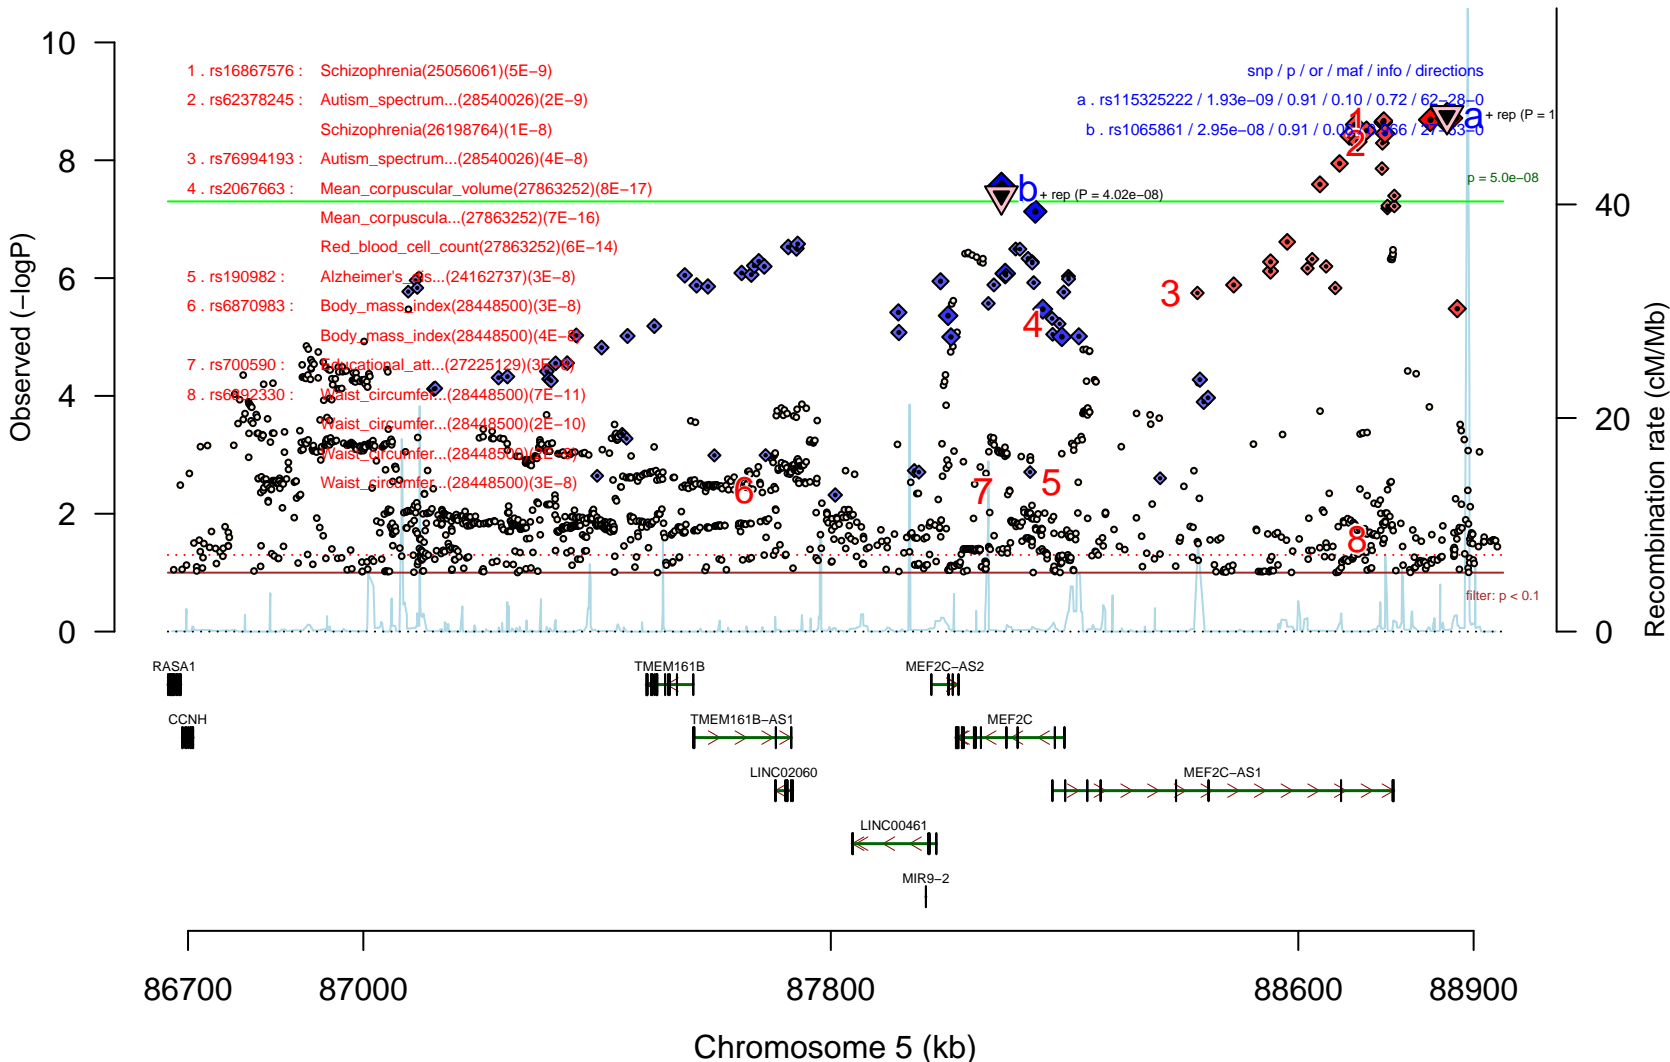

PGC SCZ w3 90 0418b.17.chr1

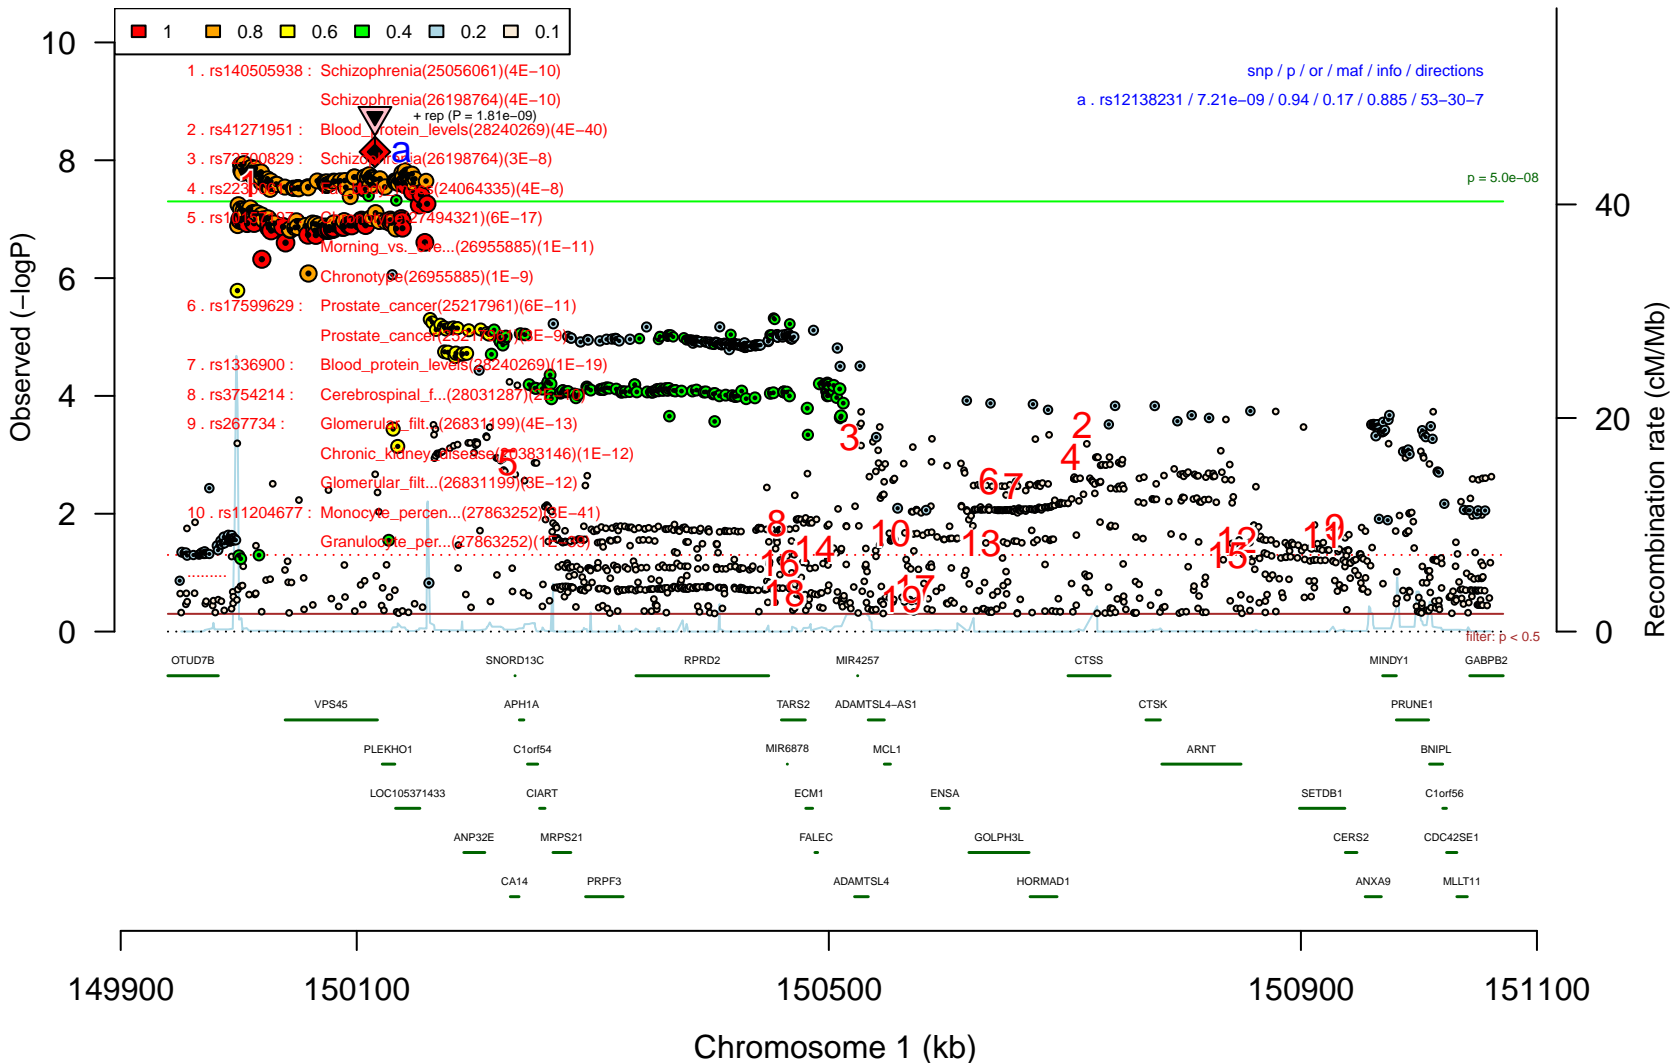

# PGC\_SCZ\_w3\_90\_0418b.12.chr1

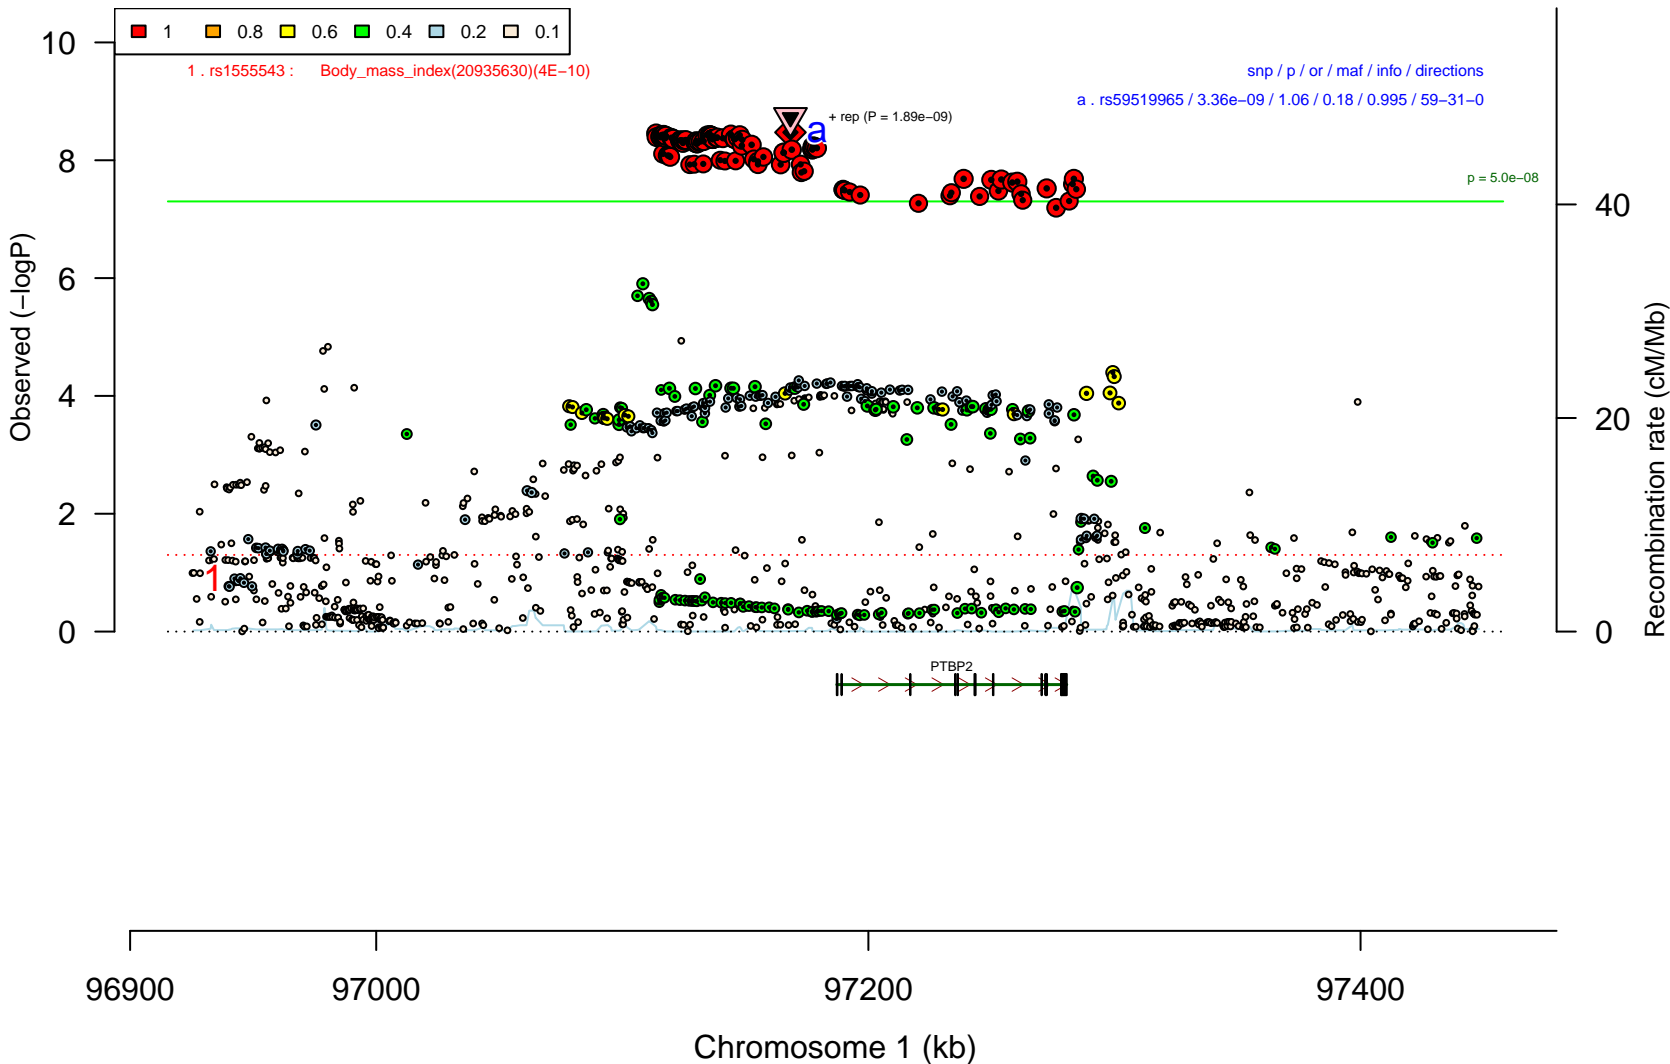

# PGC\_SCZ\_w3\_90\_0418b.245.chr18

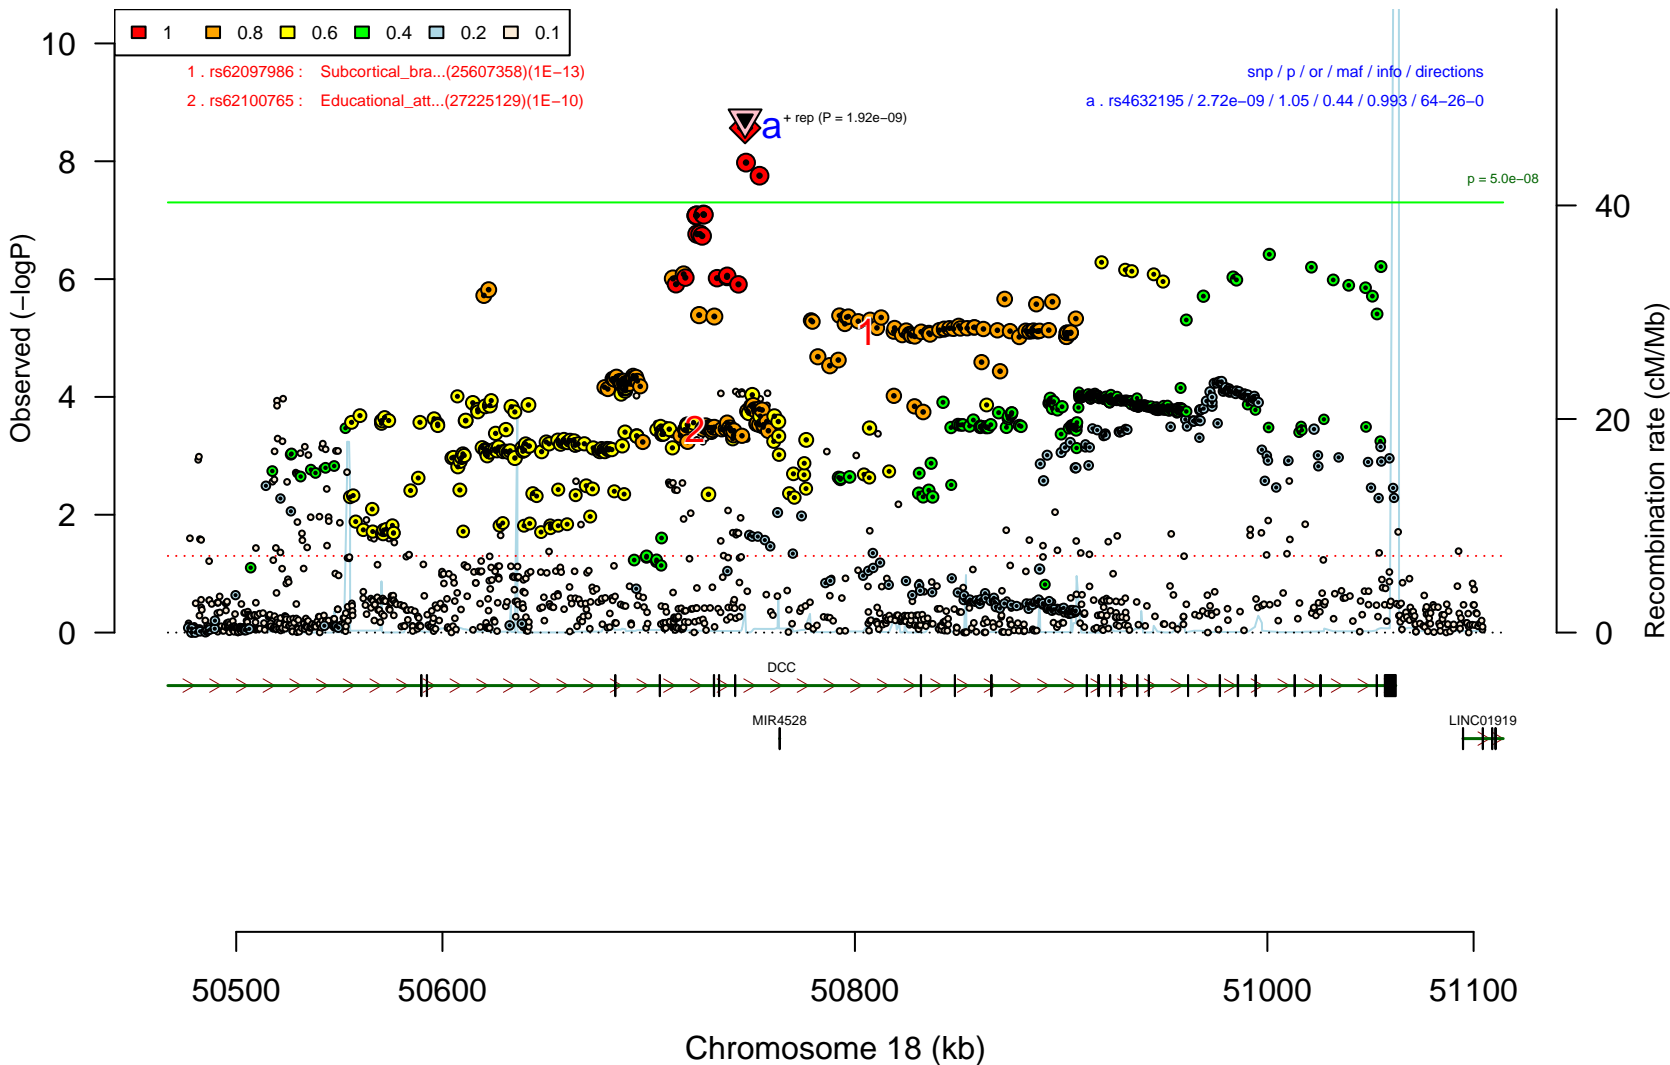

# PGC\_SCZ\_w3\_90\_0418b.152.chr9

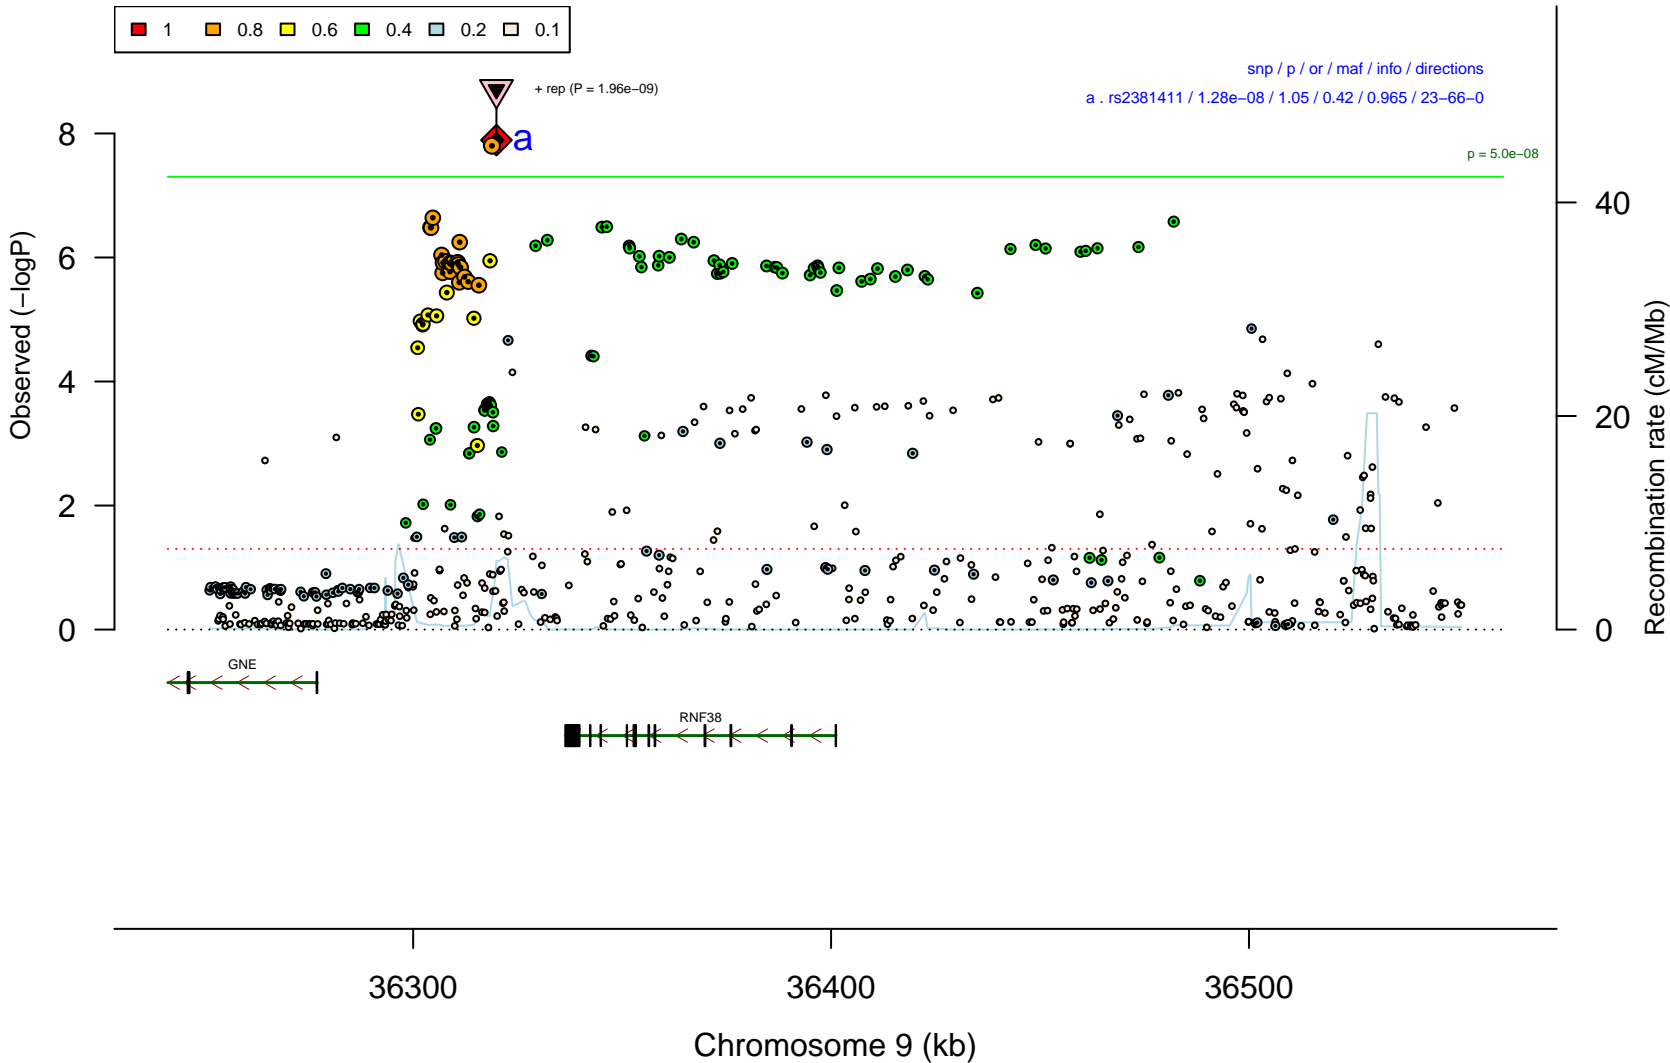



# PGC\_SCZ\_w3\_90\_0418b.148.chr8

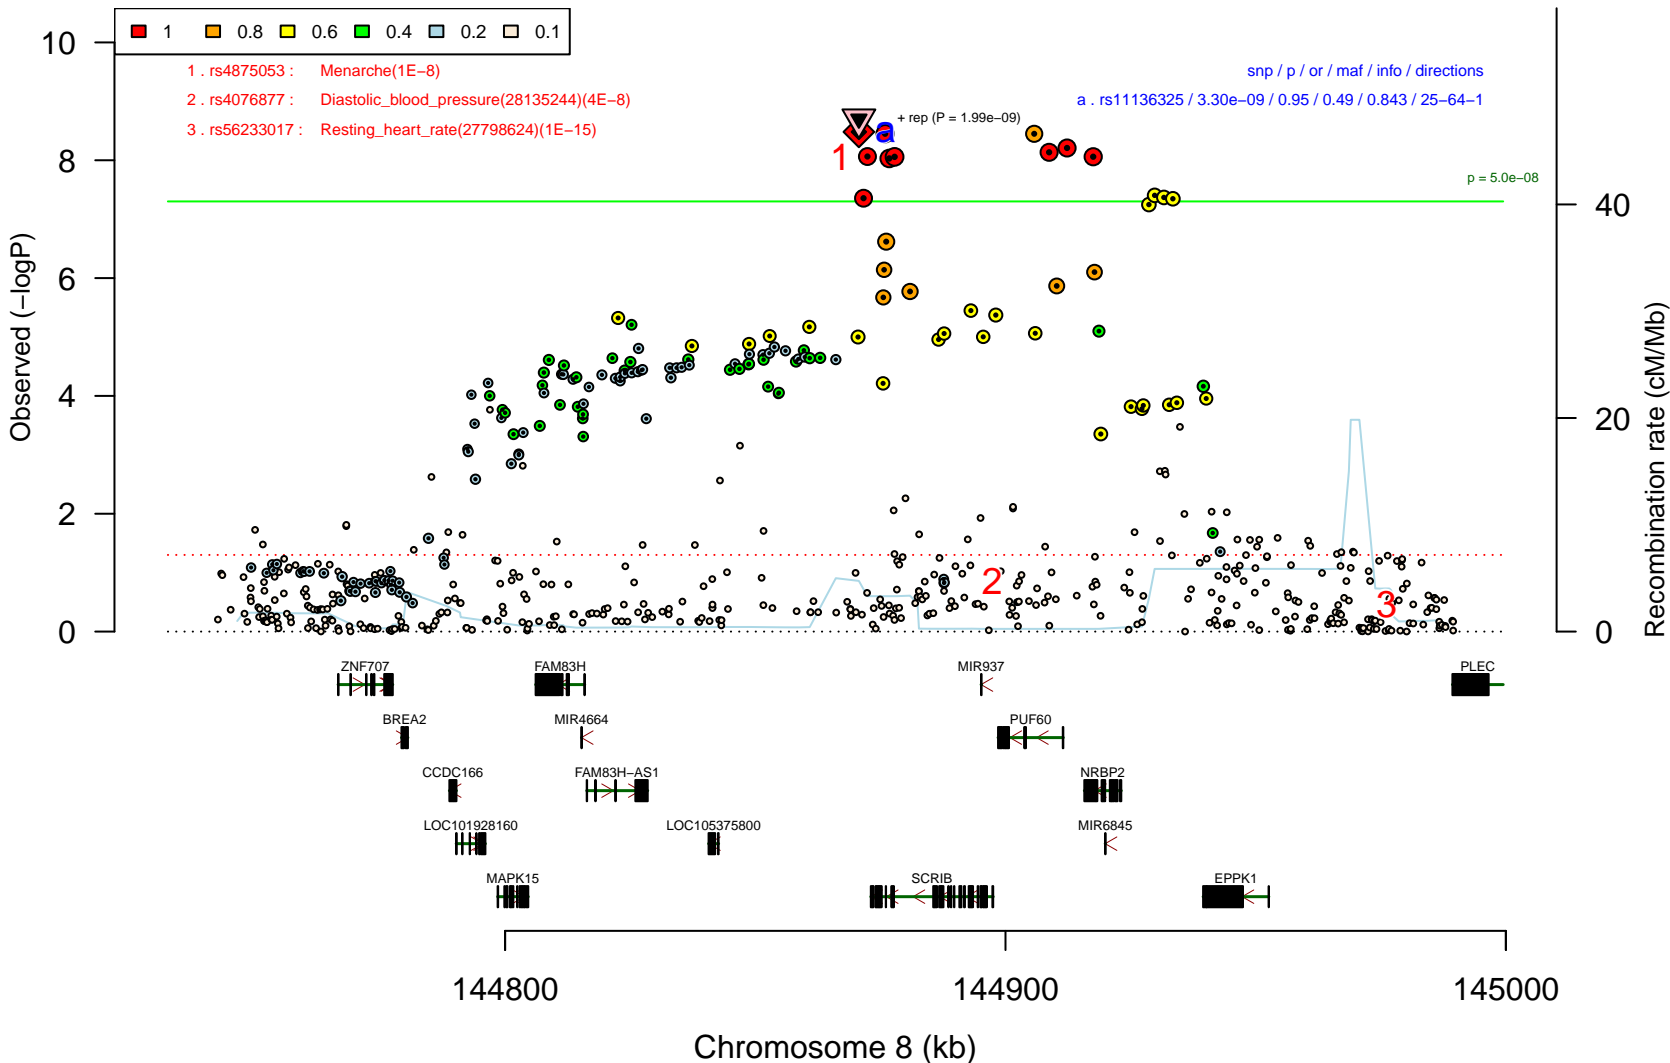

# PGC\_SCZ\_w3\_90\_0418b.209.chr14

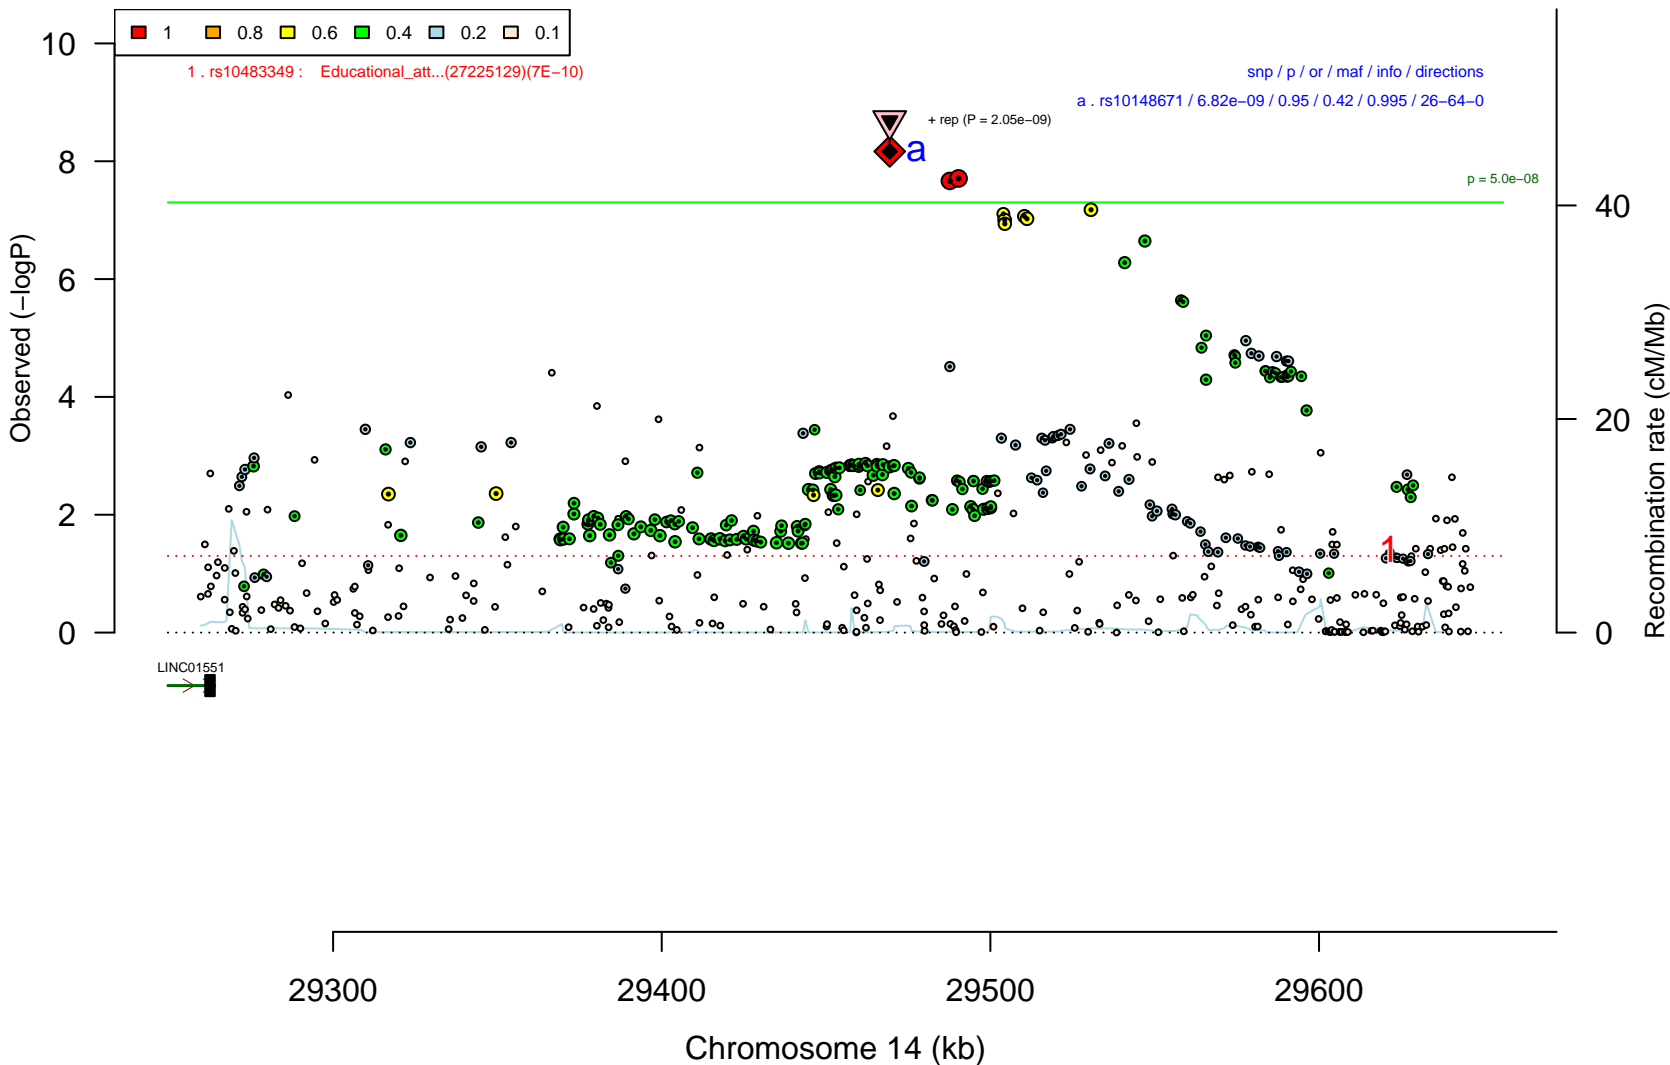

# PGC\_SCZ\_w3\_90\_0418b.90.chr5

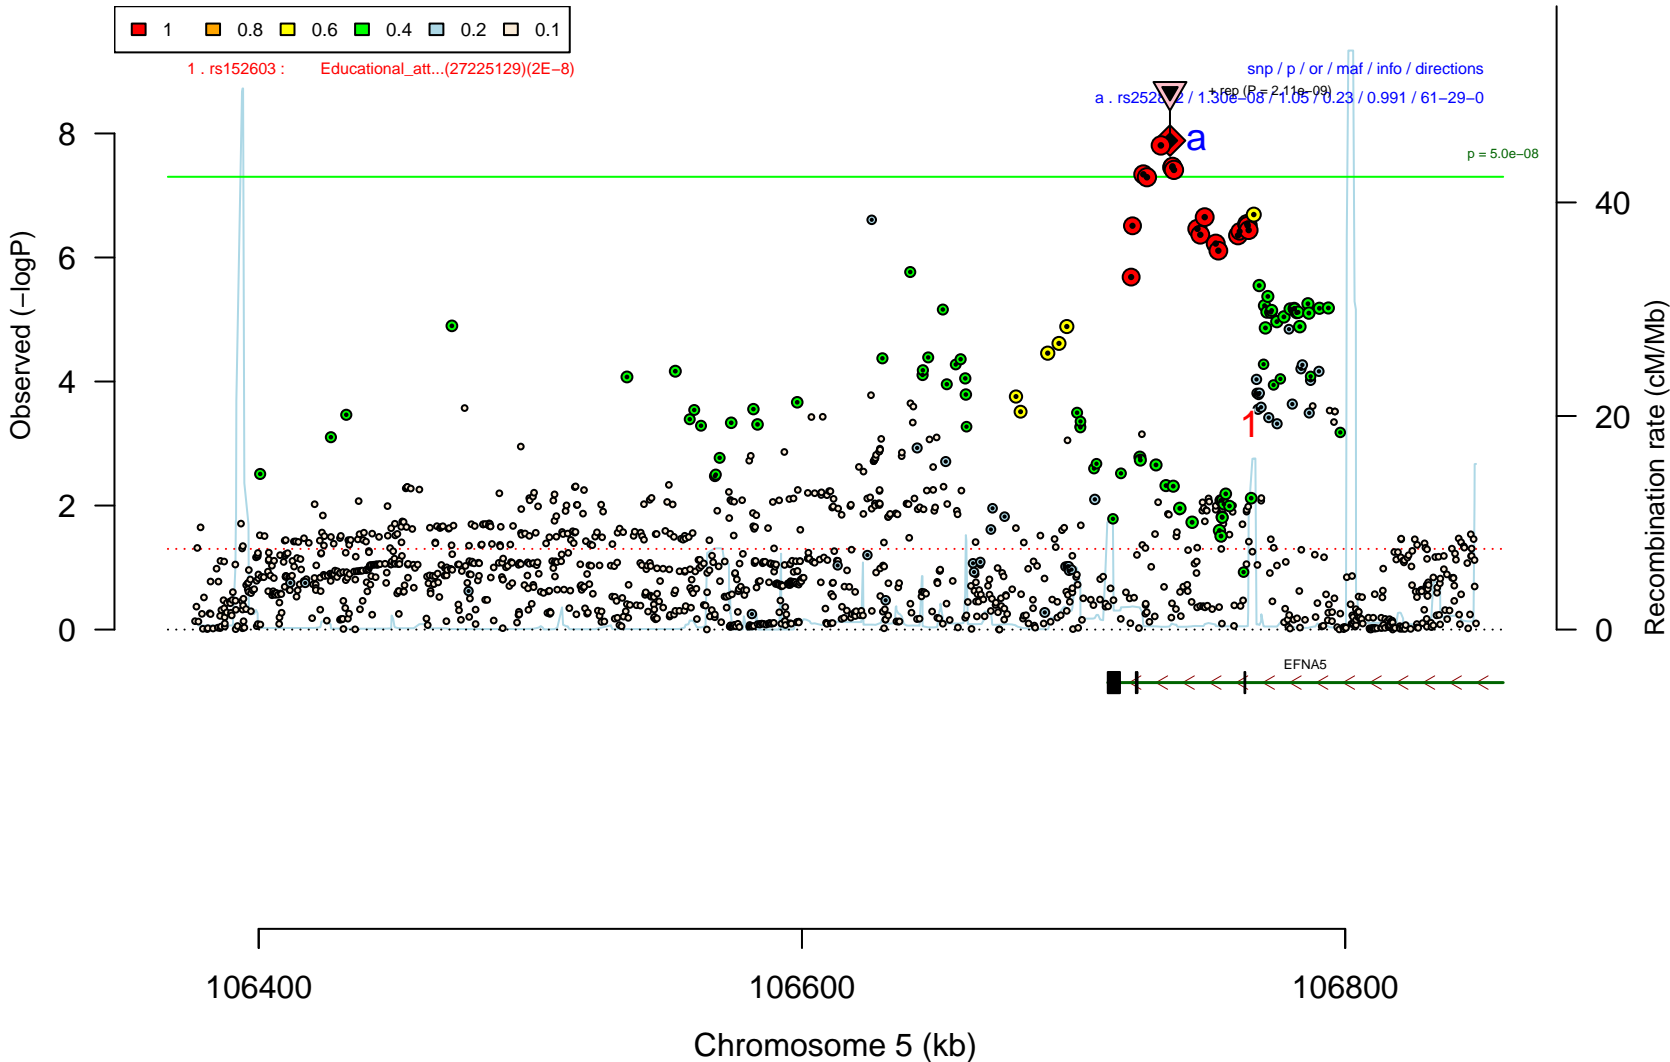

# PGC\_SCZ\_w3\_90\_0418b.67.chr4

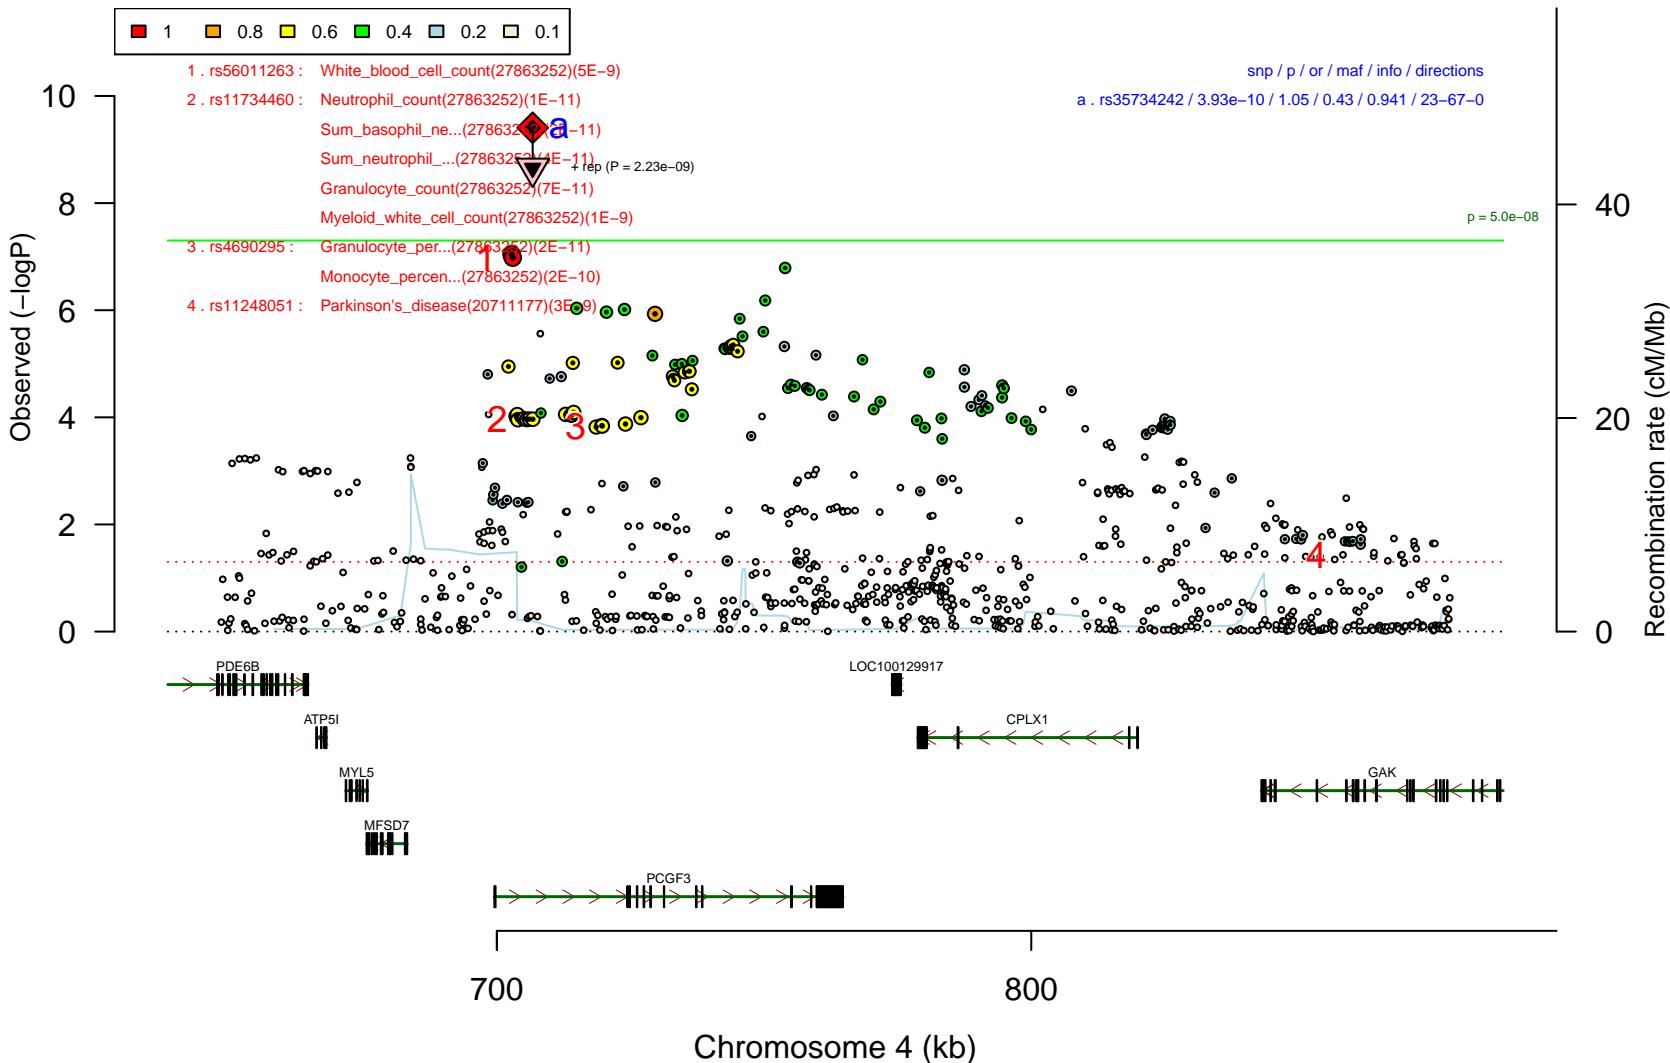

# PGC\_SCZ\_w3\_90\_0418b.254.chr19

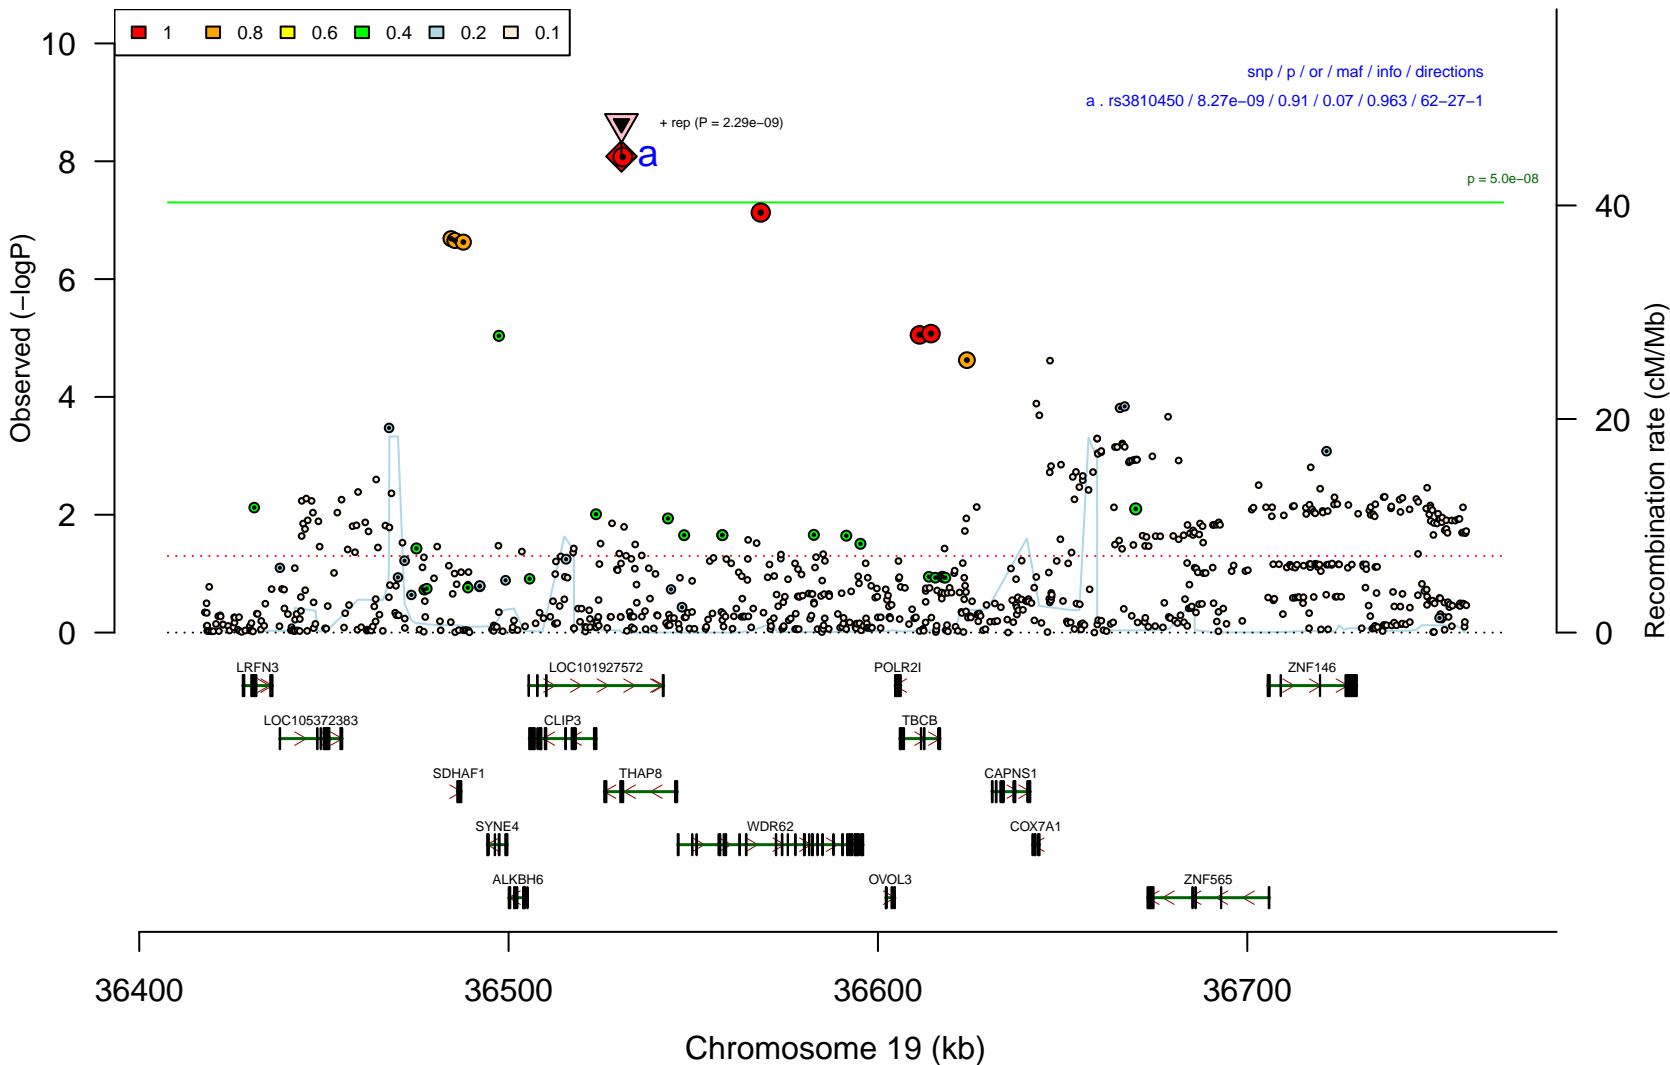

# PGC\_SCZ\_w3\_90\_0418b.195.chr12

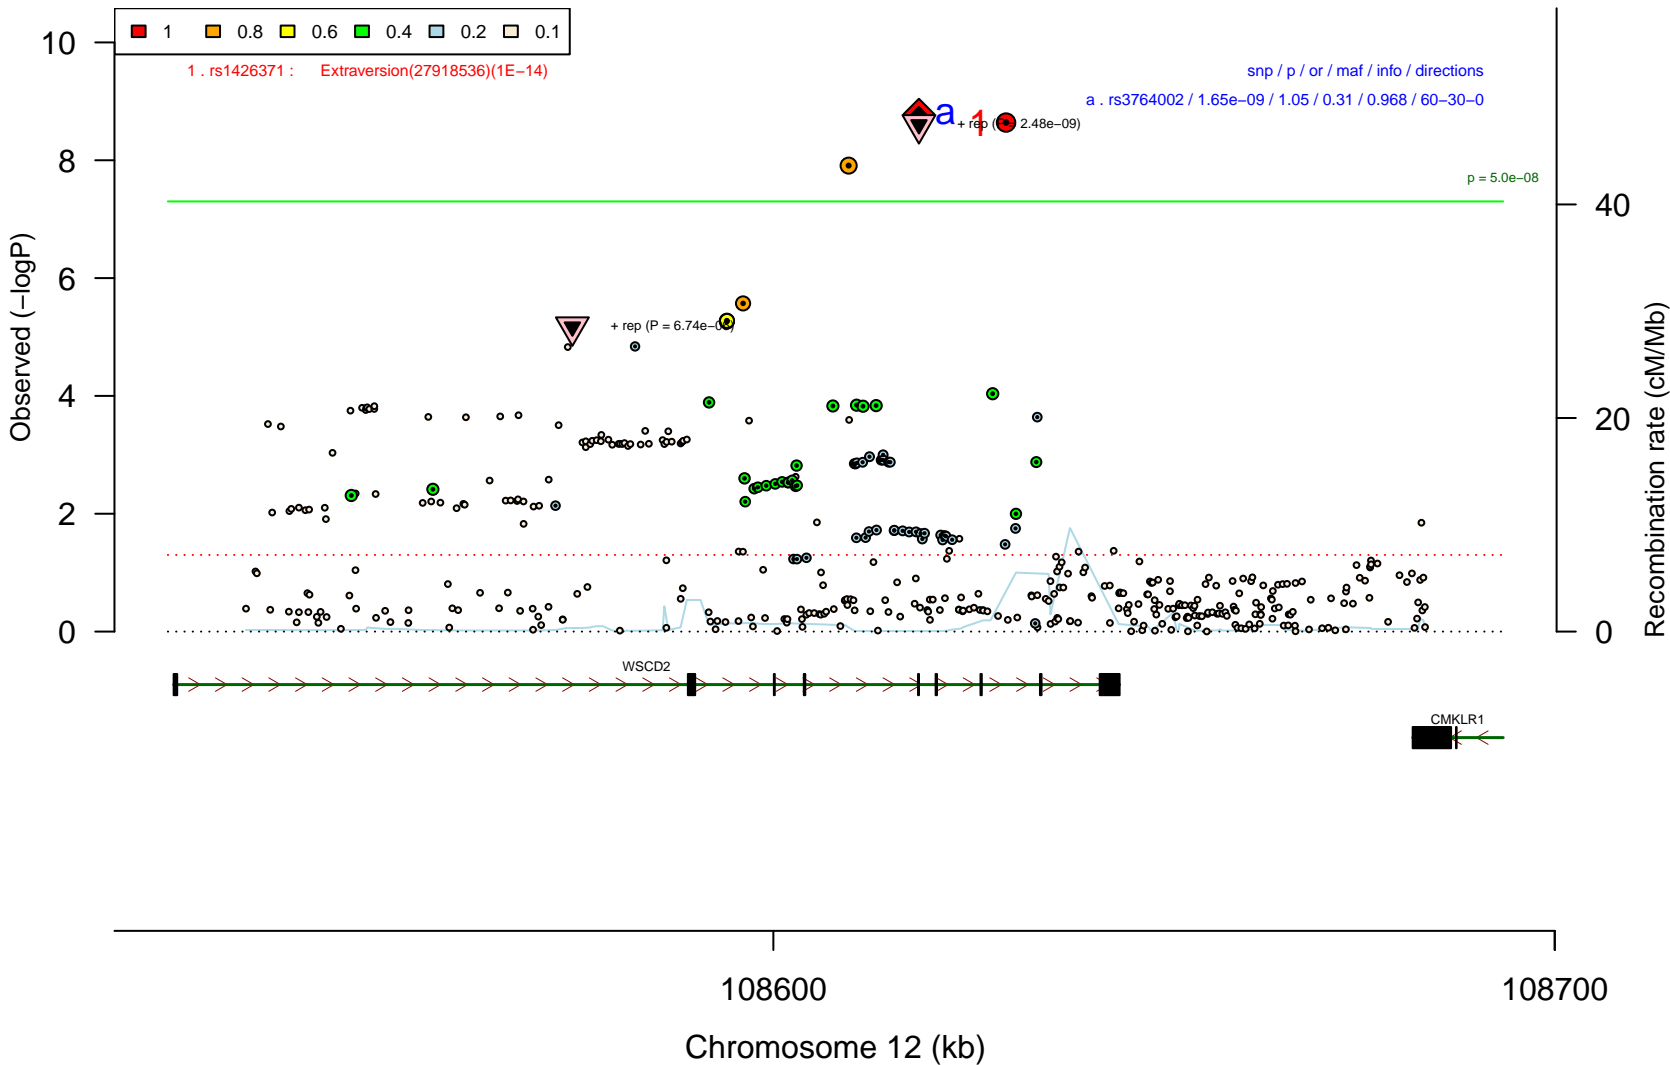

# PGC\_SCZ\_w3\_90\_0418b.28.chr2

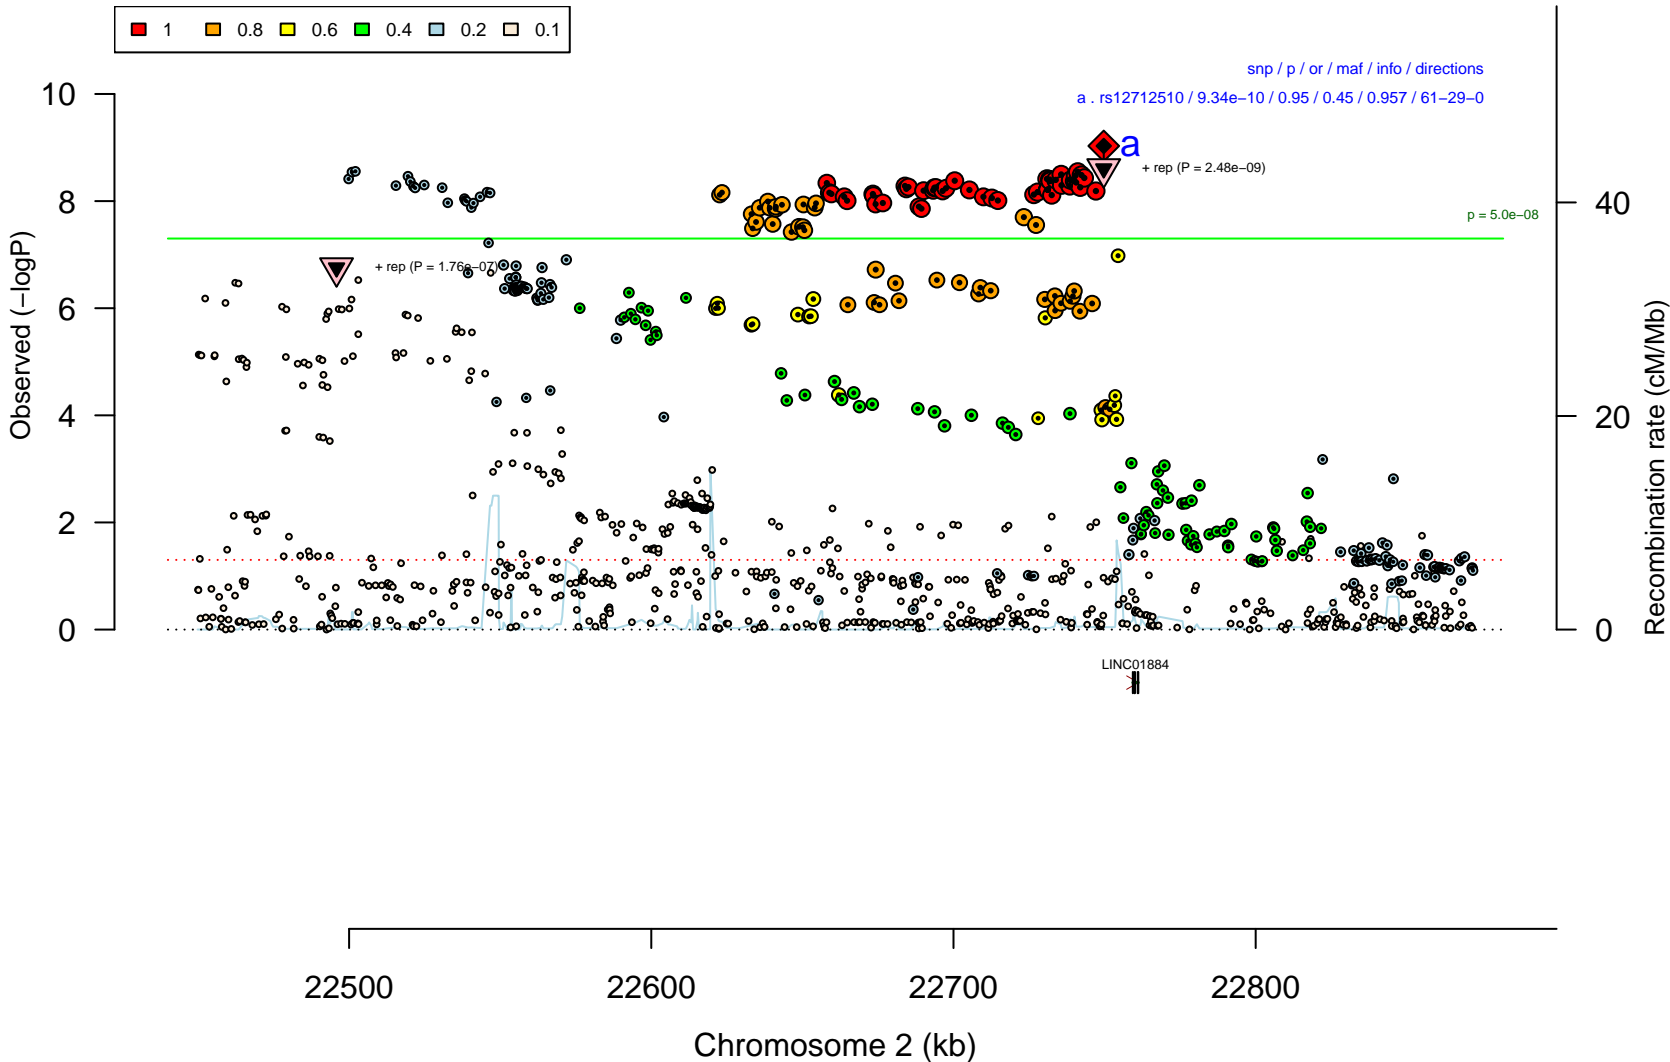

# PGC\_SCZ\_w3\_90\_0418b.251.chr19

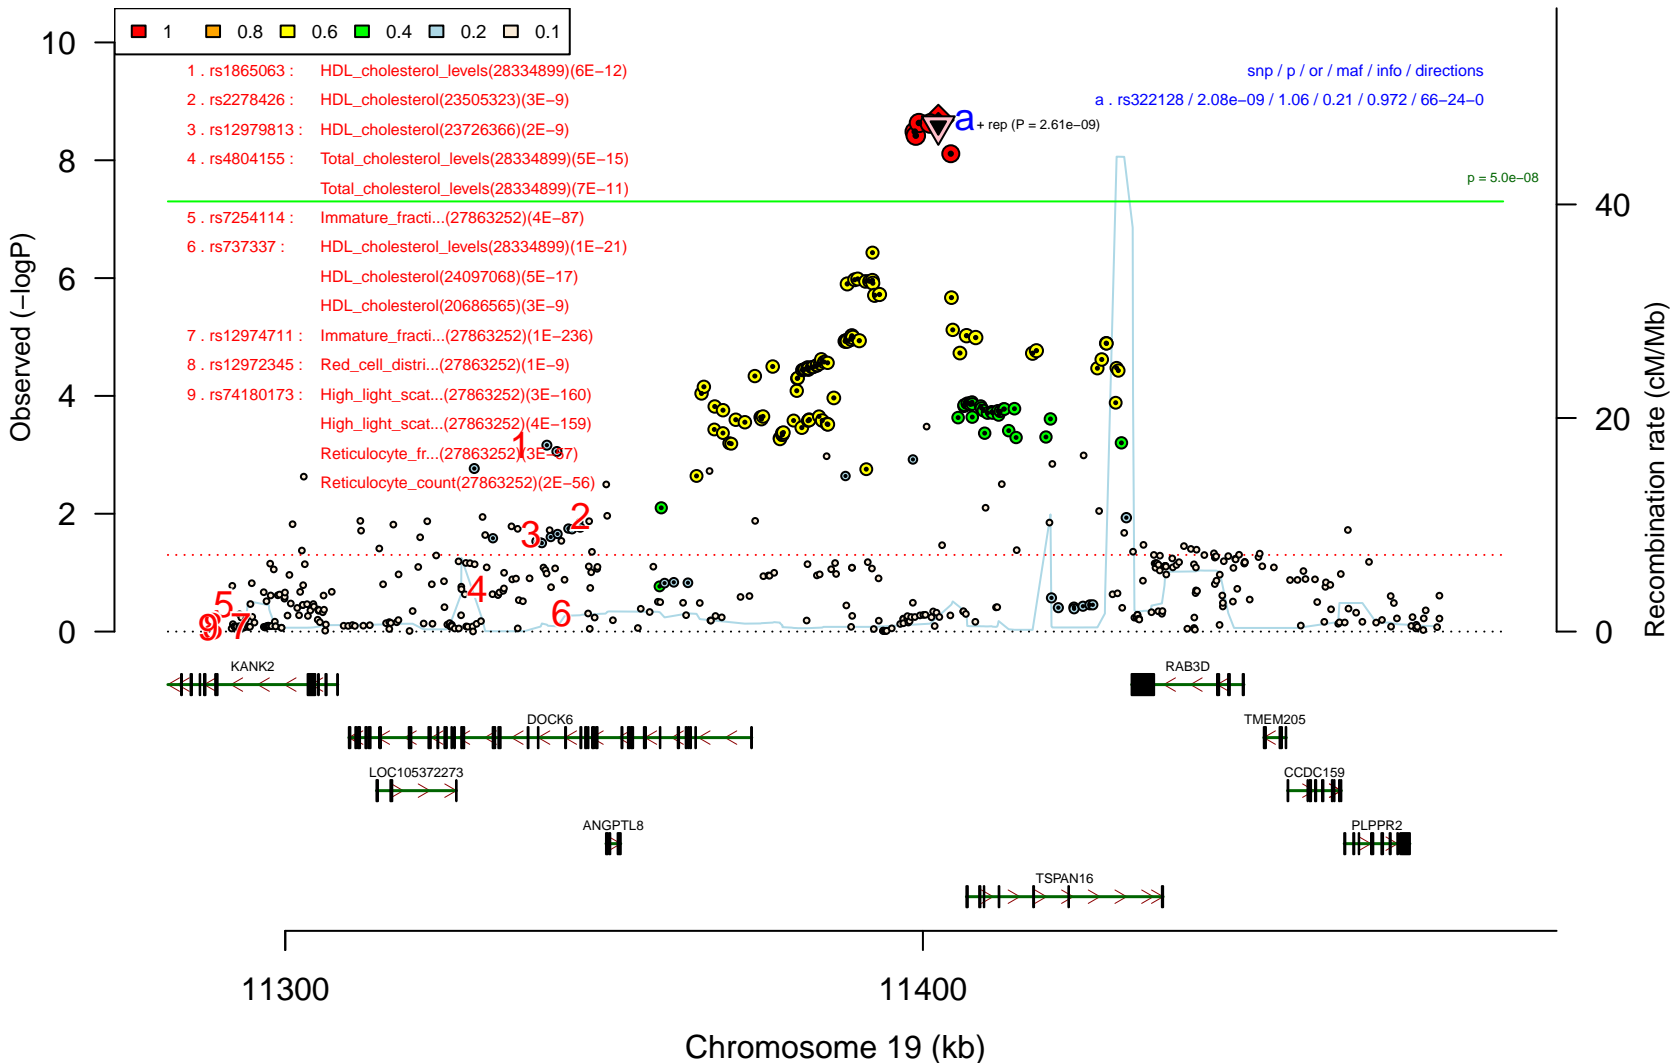



# PGC\_SCZ\_w3\_90\_0418b.133.chr7

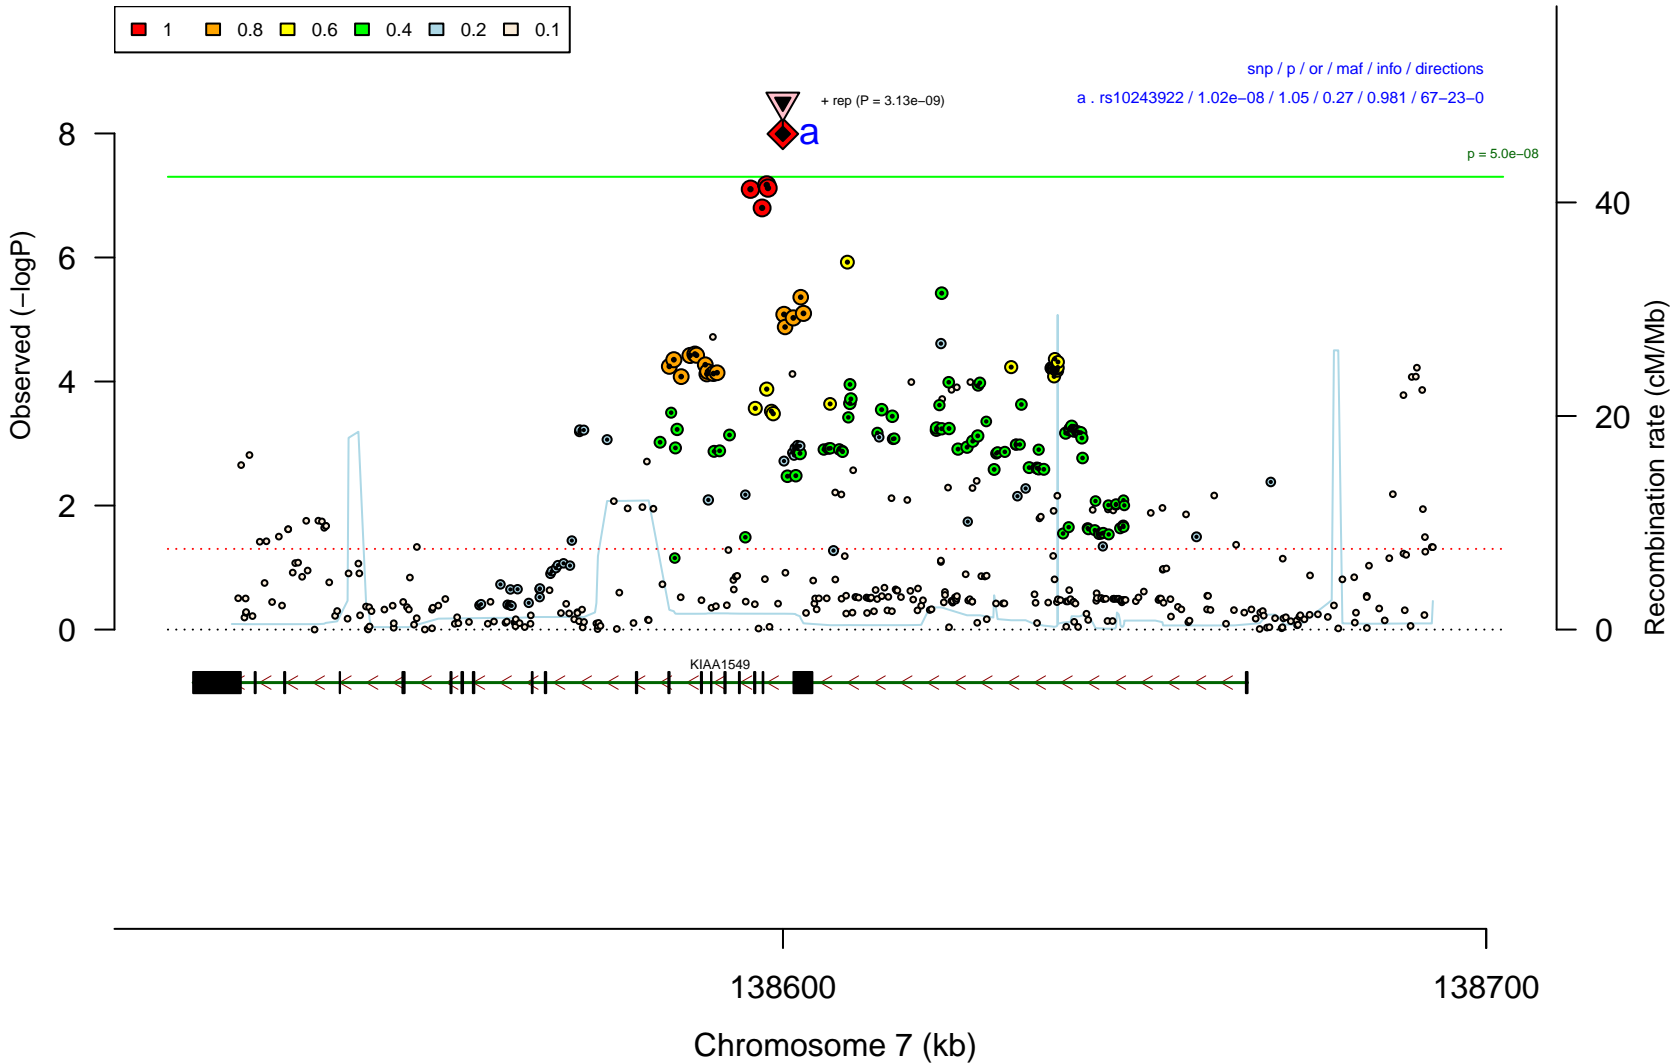

# PGC\_SCZ\_w3\_90\_0418b.207.chr13

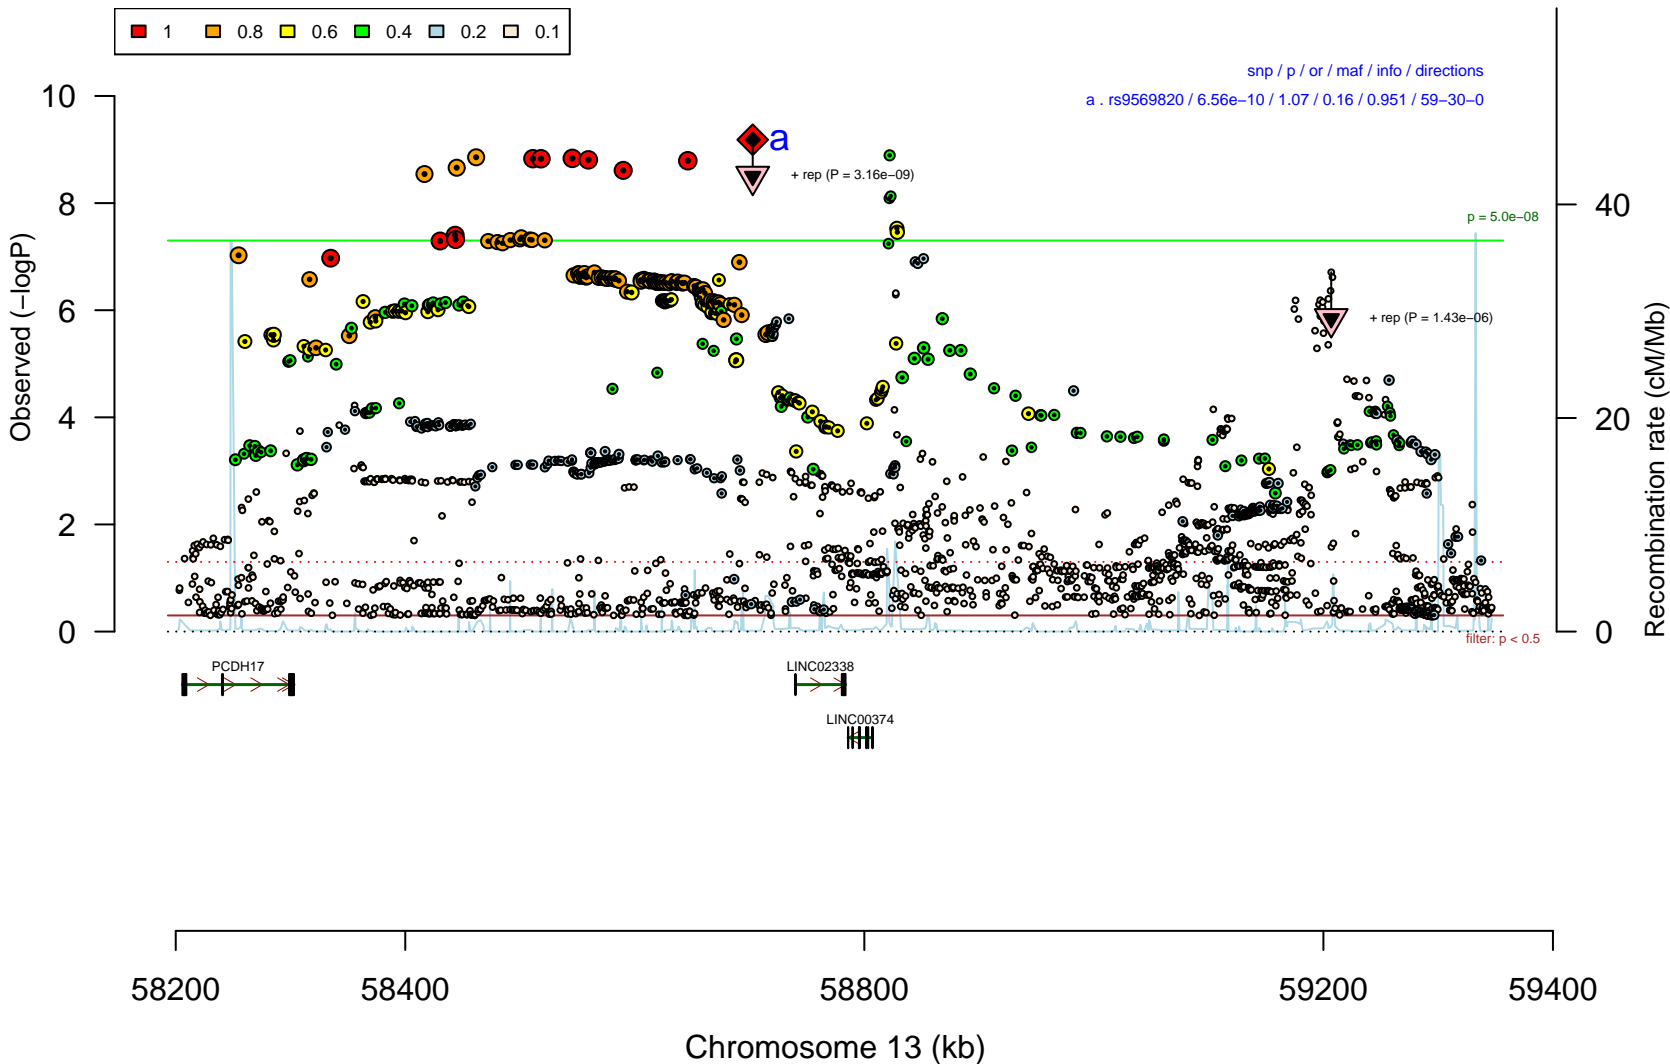

**PGC\_SCZ\_w3\_90\_0418b.155.chr9**

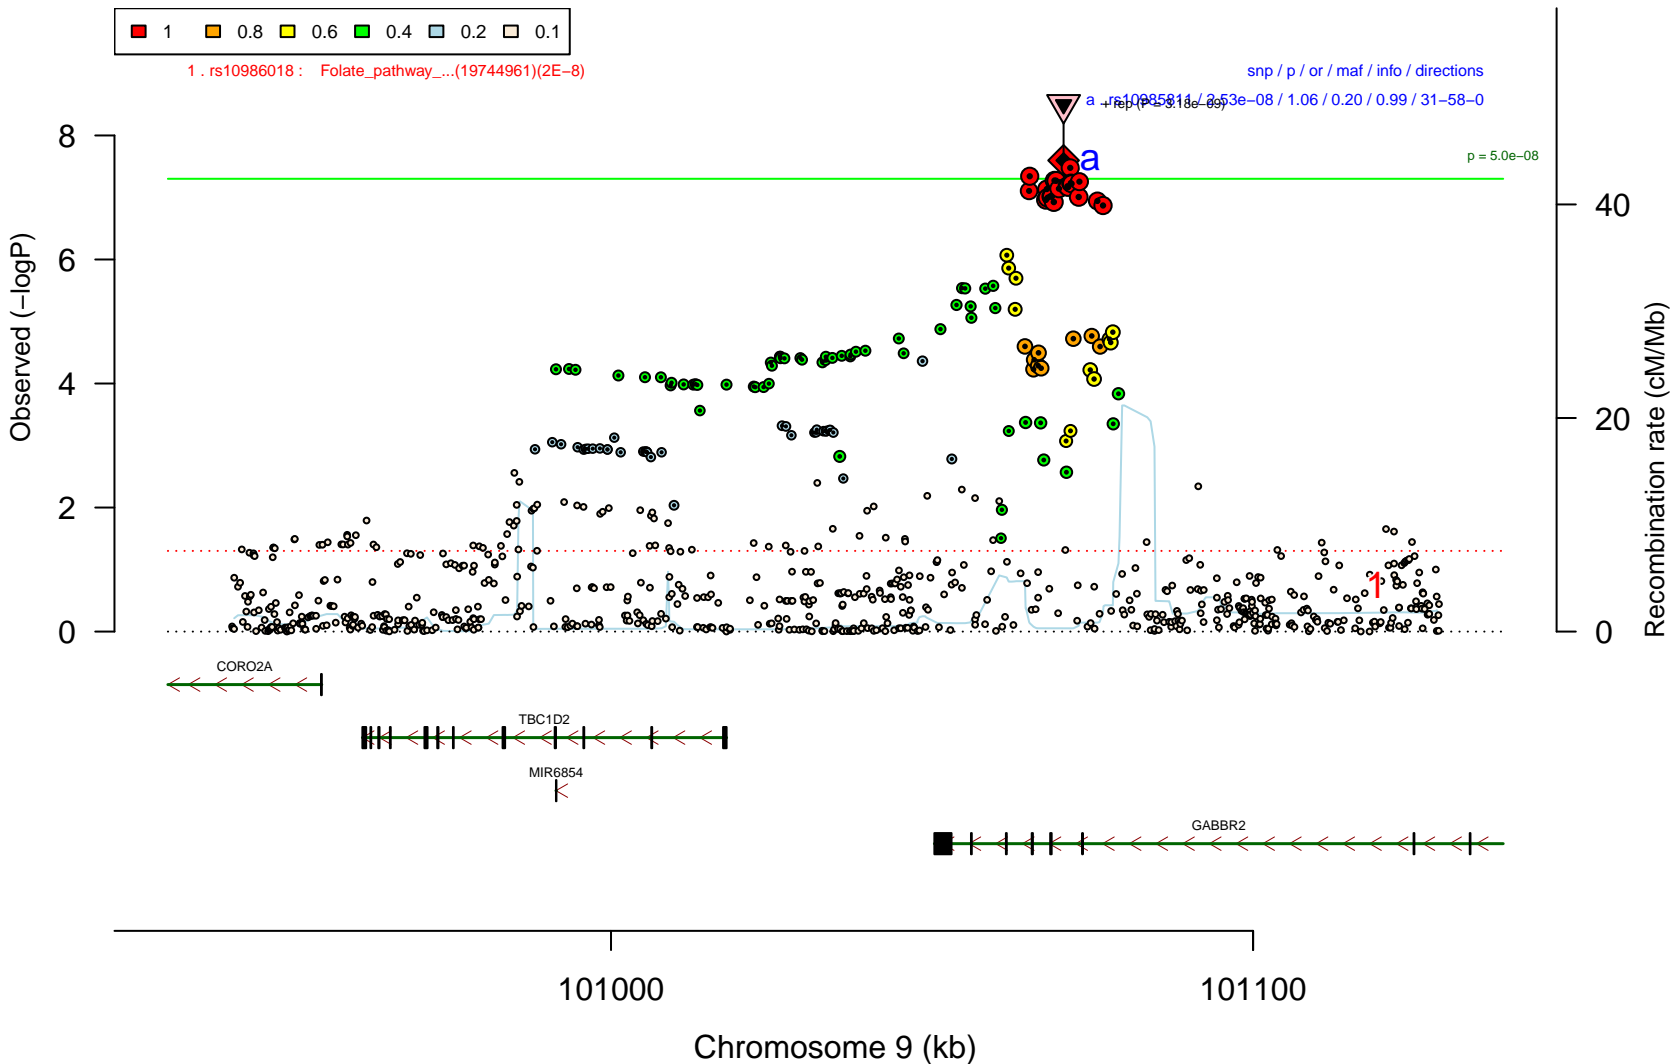

# PGC\_SCZ\_w3\_90\_0418b.198.chr12

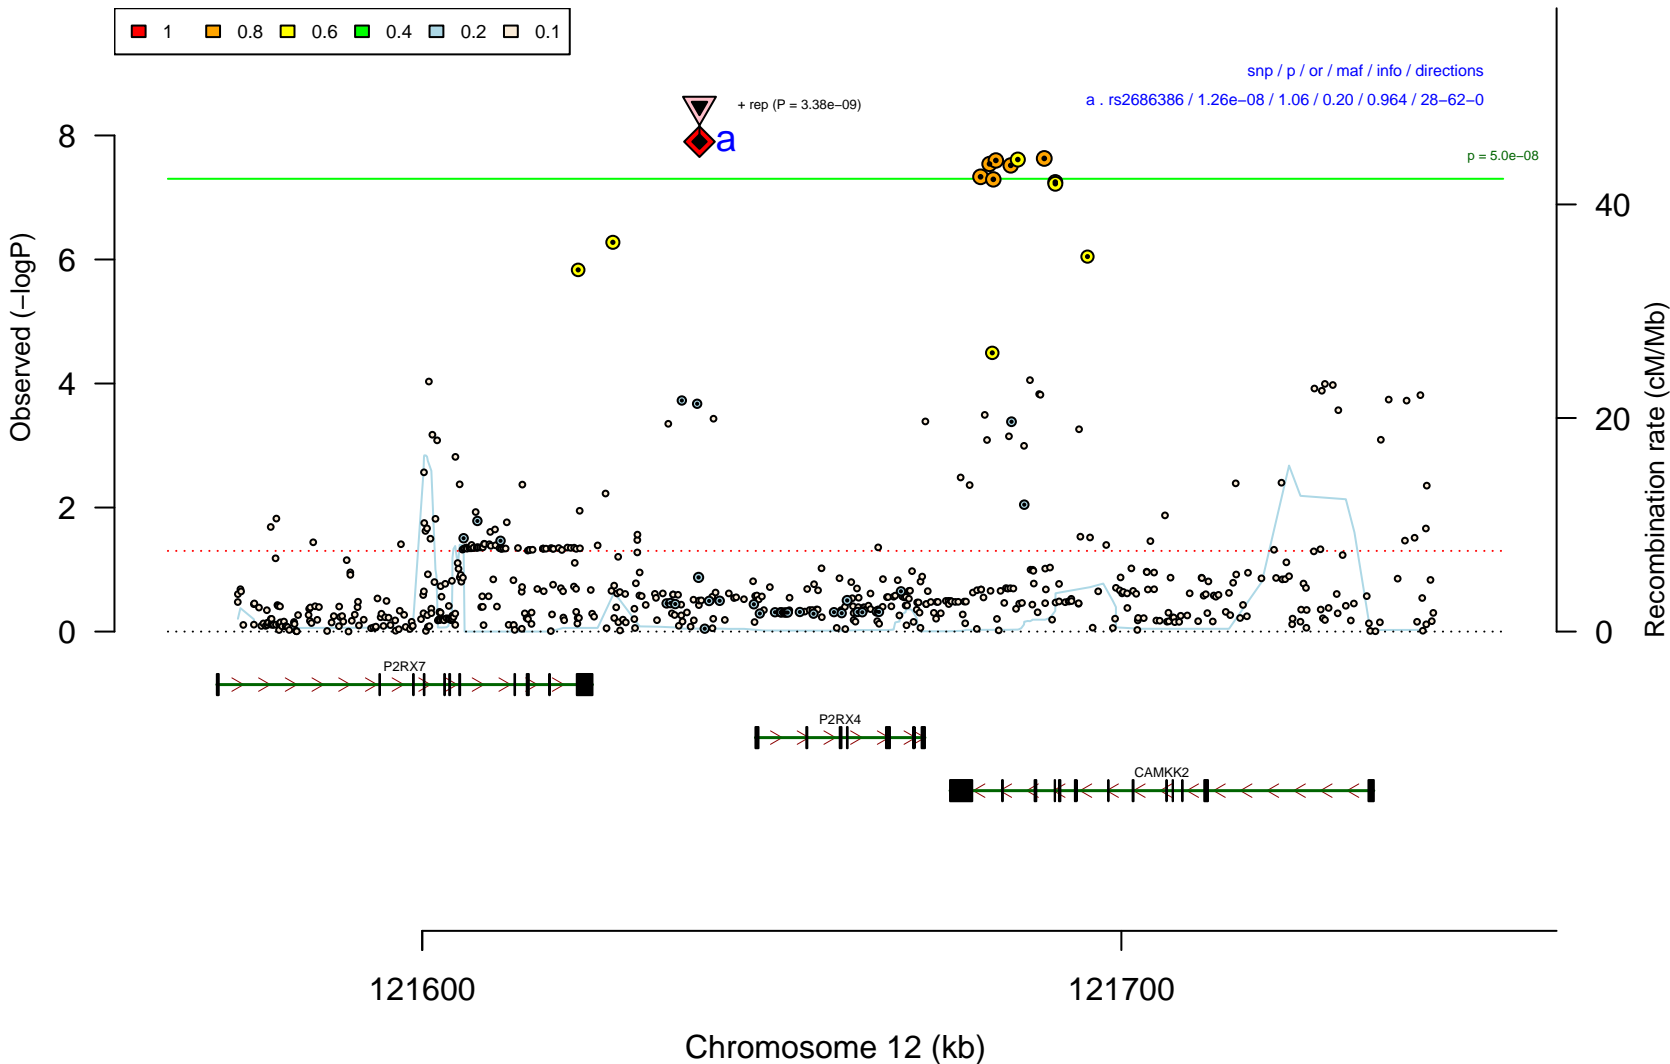

# PGC\_SCZ\_w3\_90\_0418b.122.chr7

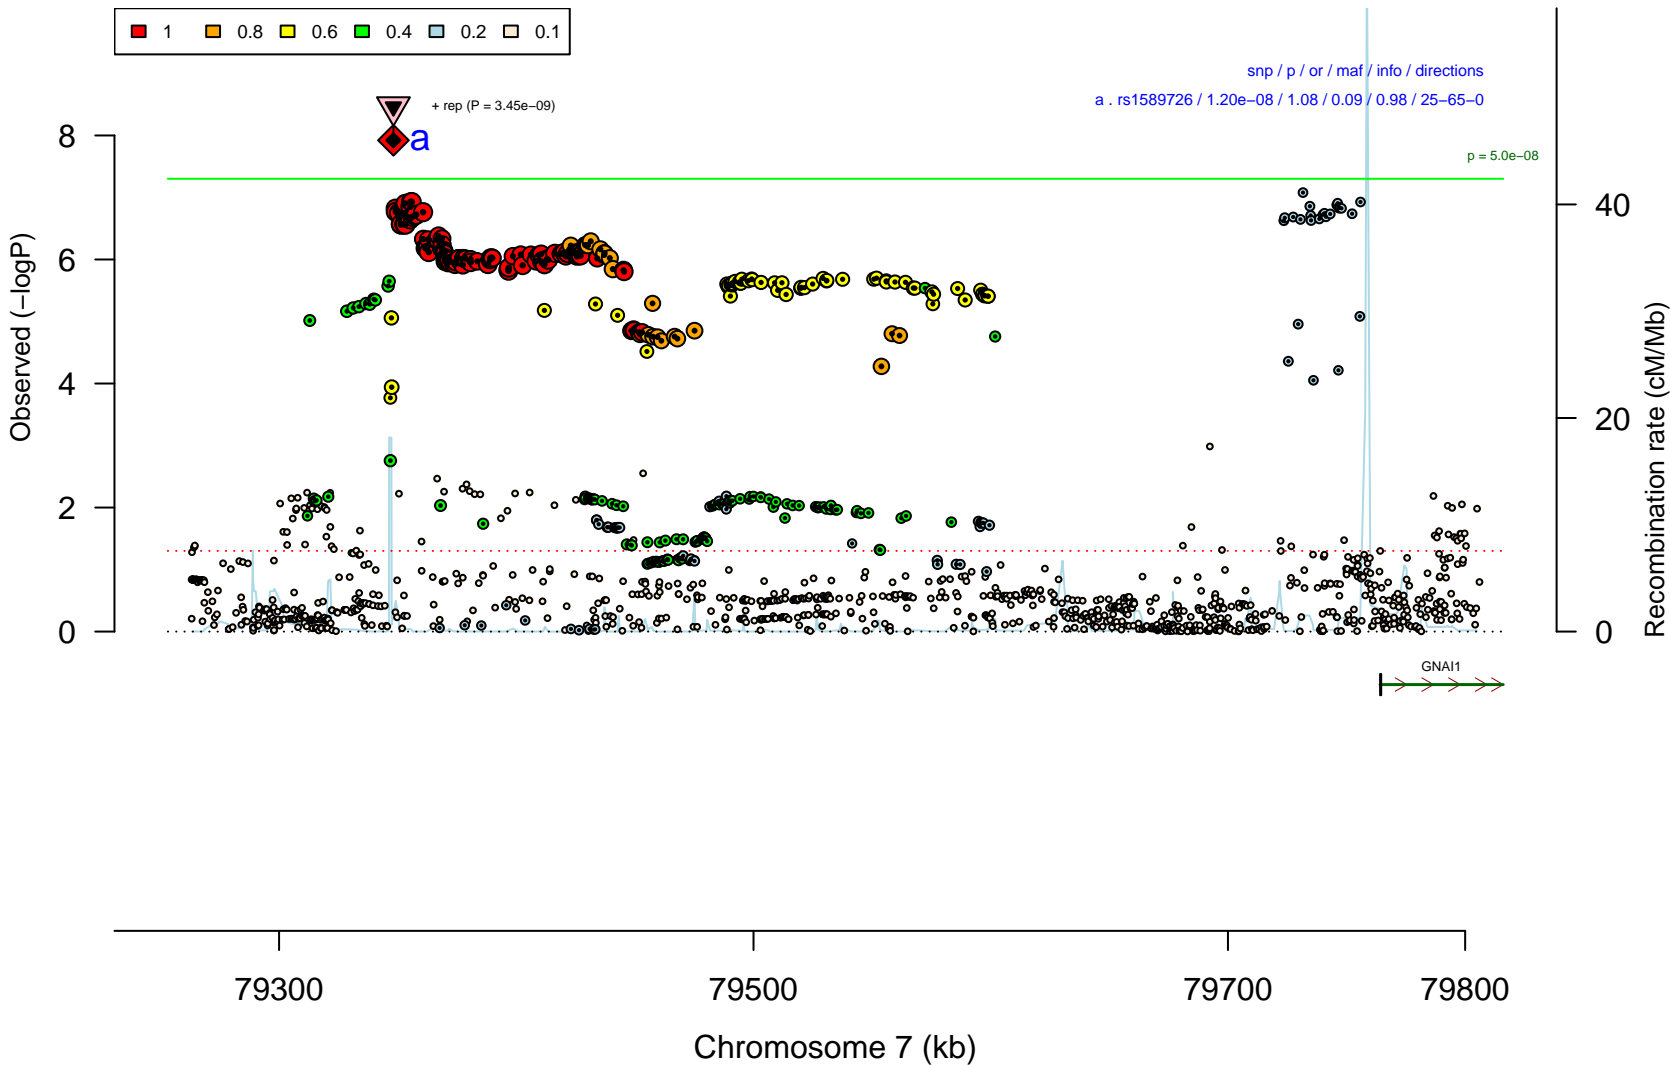

# PGC\_SCZ\_w3\_90\_0418b.194.chr12

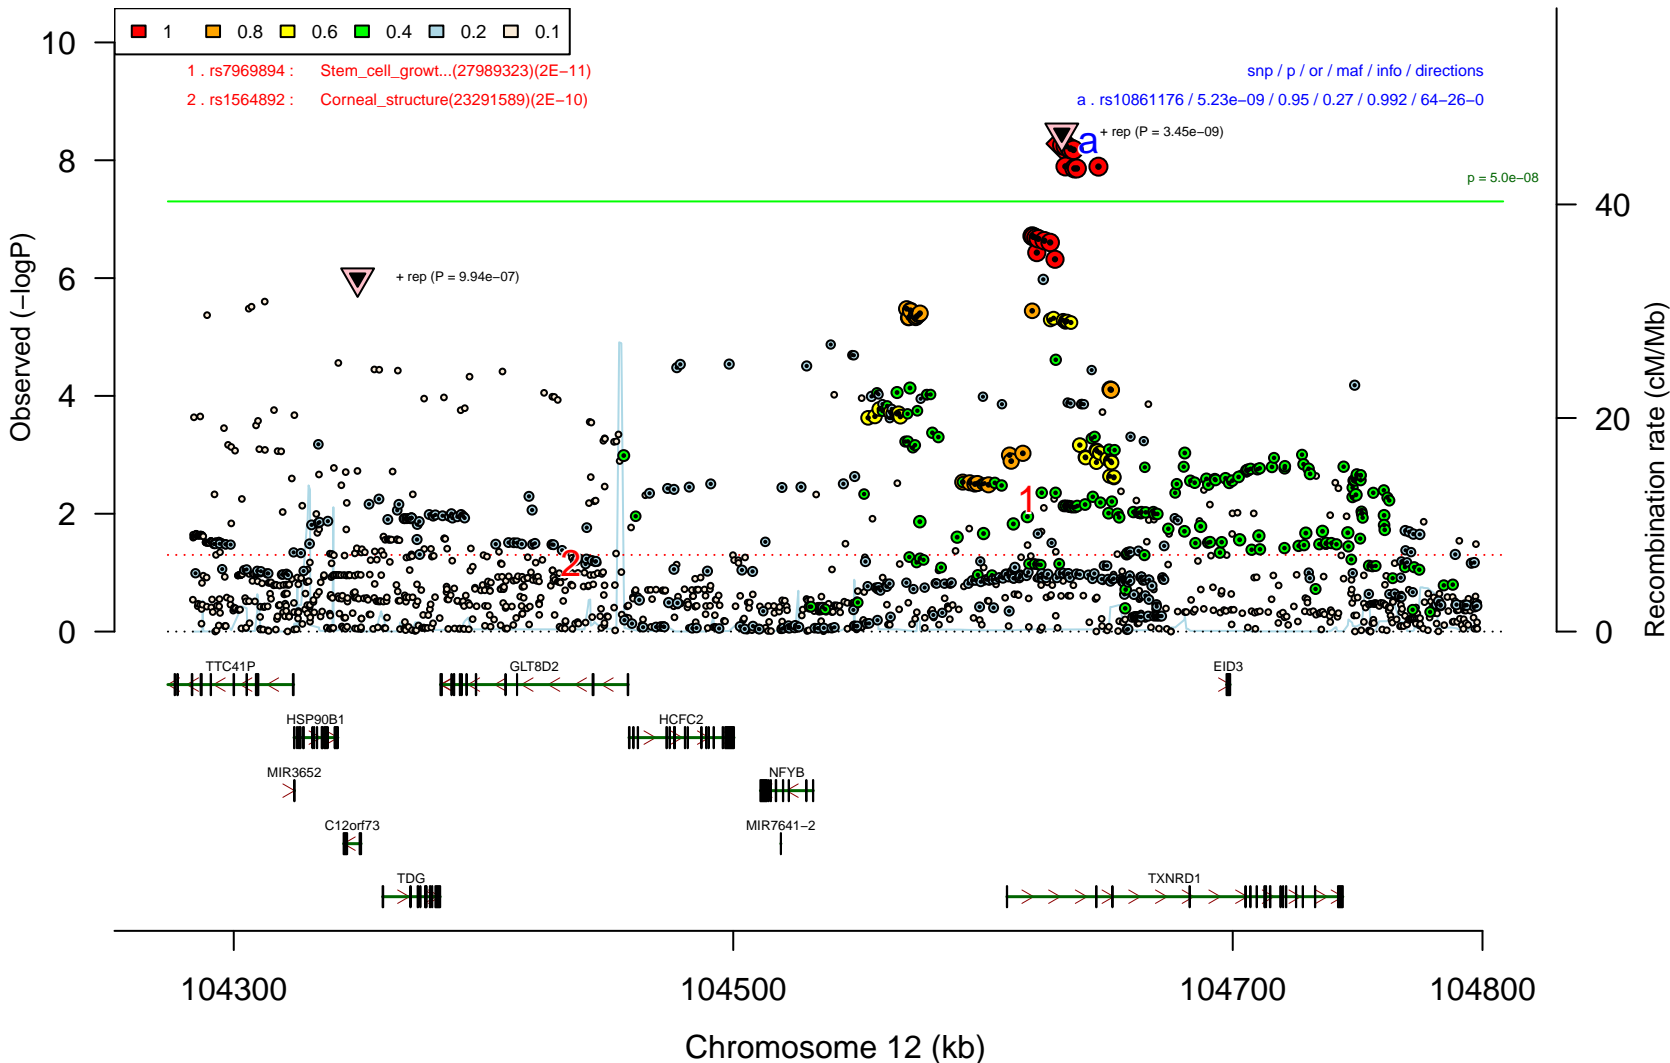

# PGC\_SCZ\_w3\_90\_0418b.71.chr4

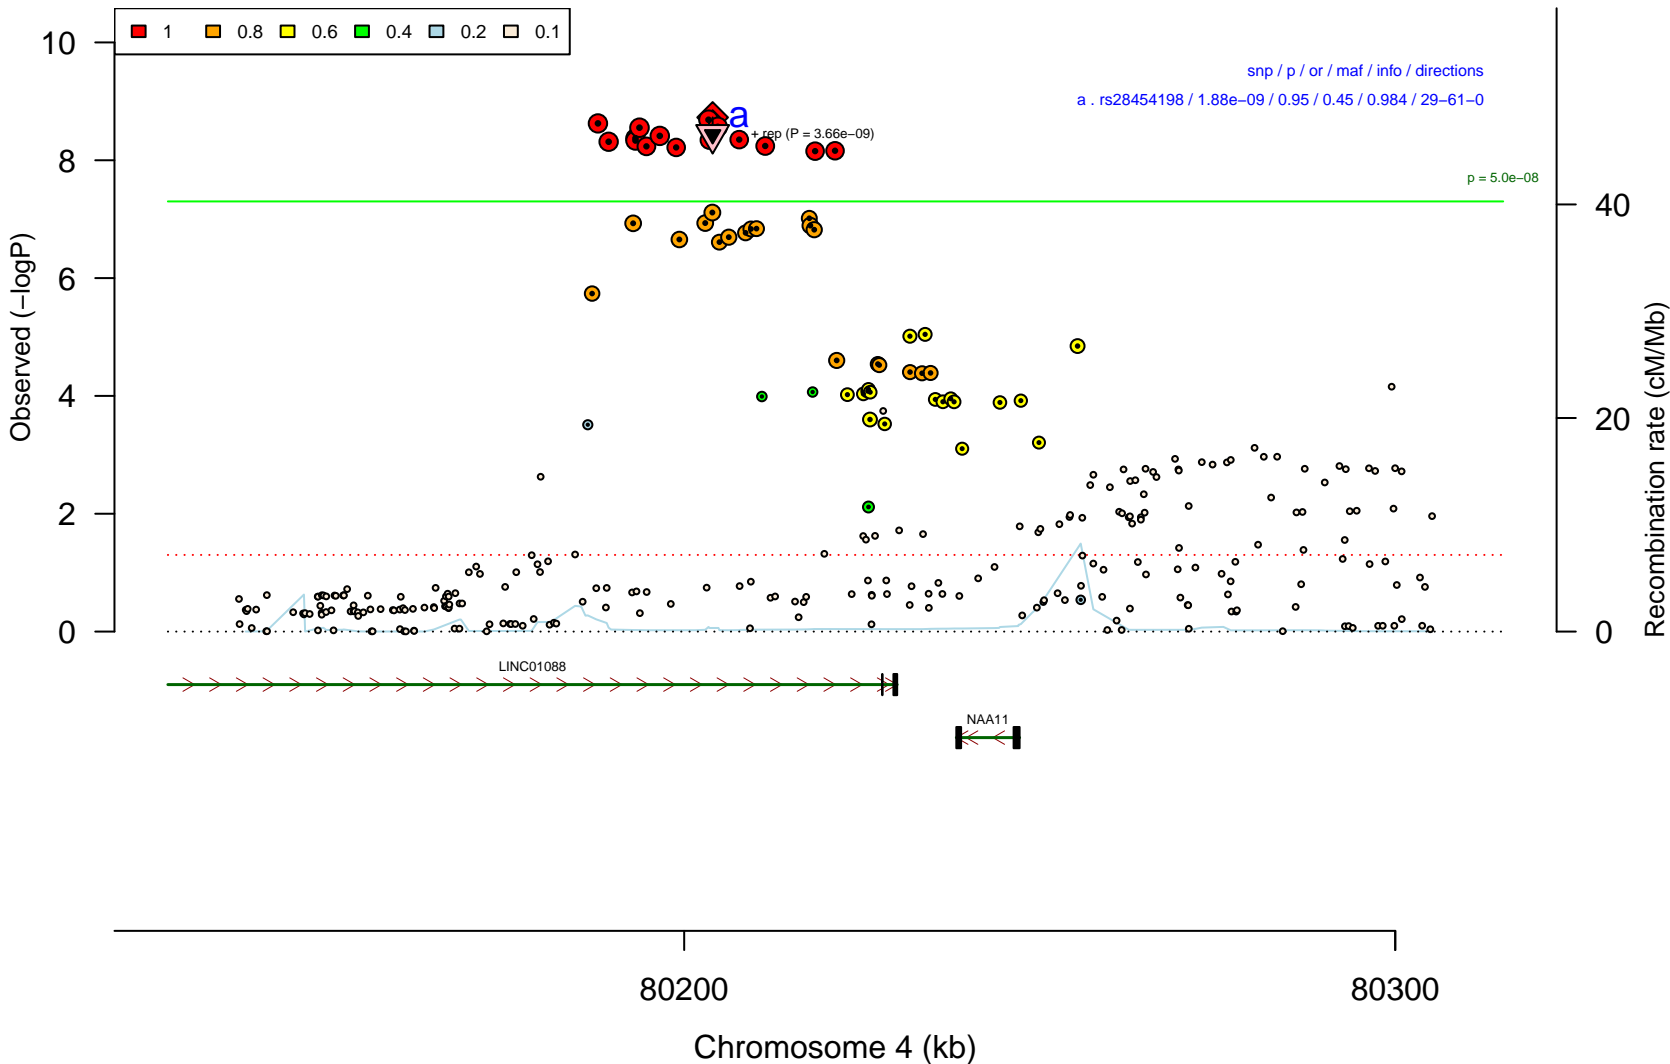

# PGC\_SCZ\_w3\_90\_0418b.22.chr1

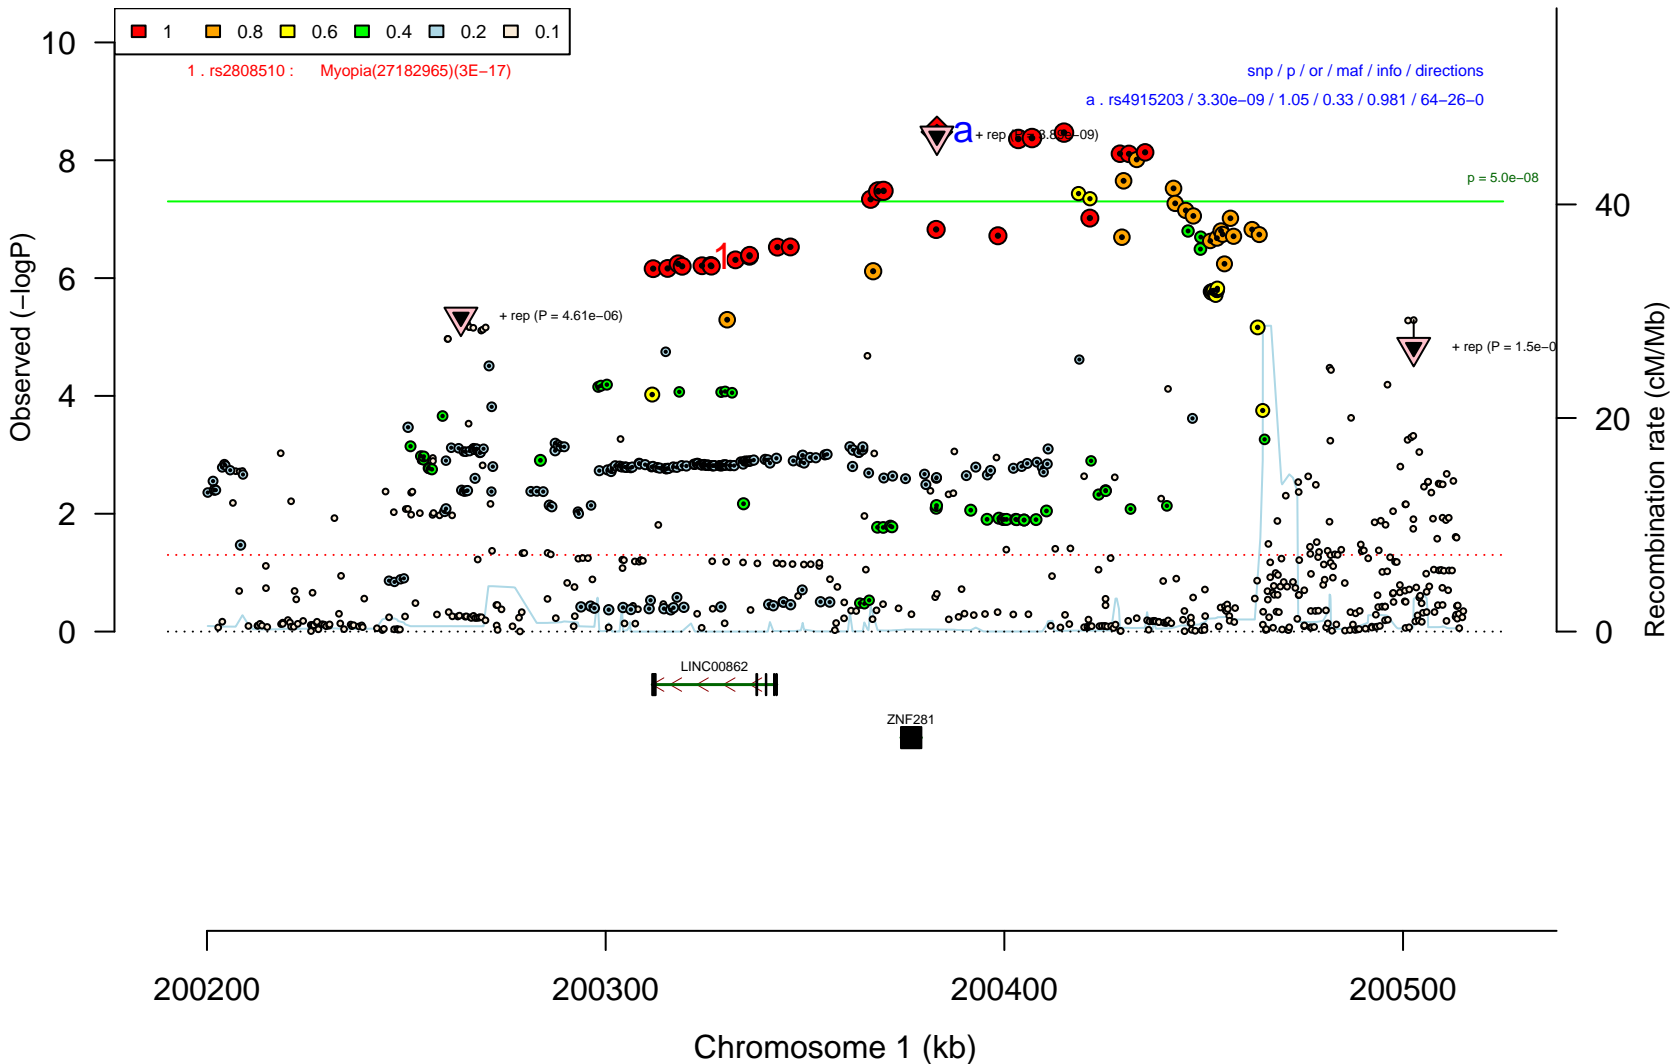



# PGC\_SCZ\_w3\_90\_0418b.156.chr9

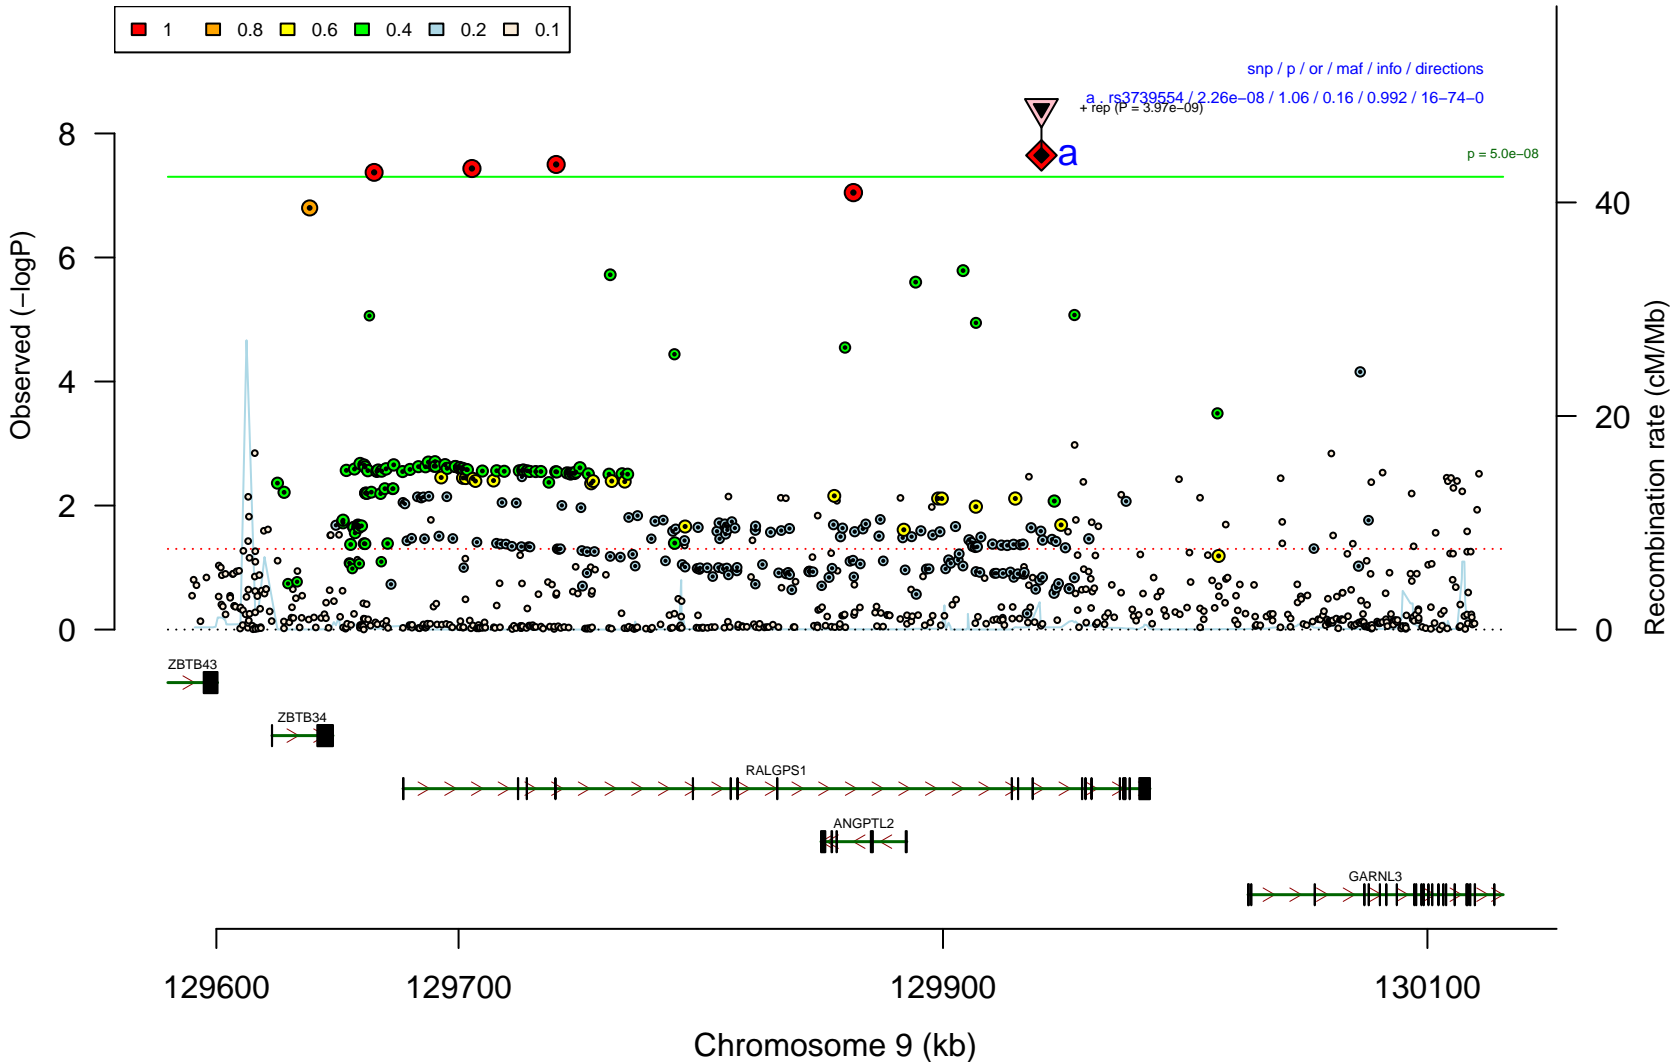

# PGC\_SCZ\_w3\_90\_0418b.97.chr5

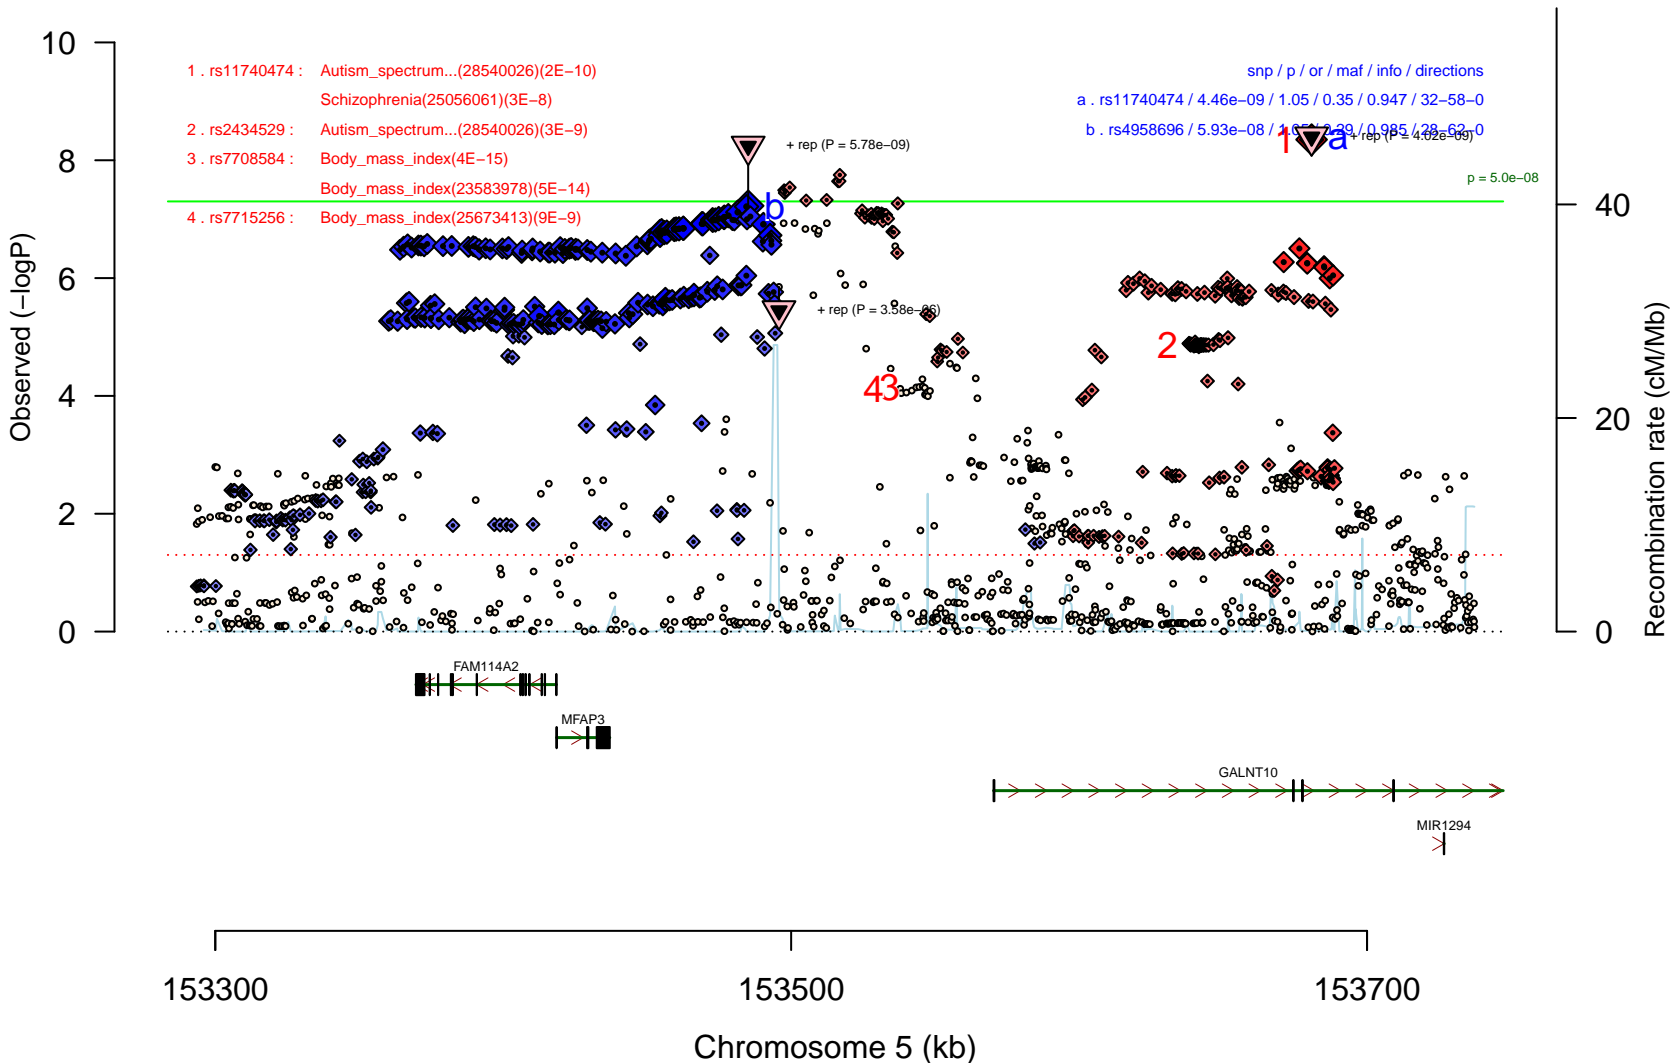

# PGC\_SCZ\_w3\_90\_0418b.203.chr13

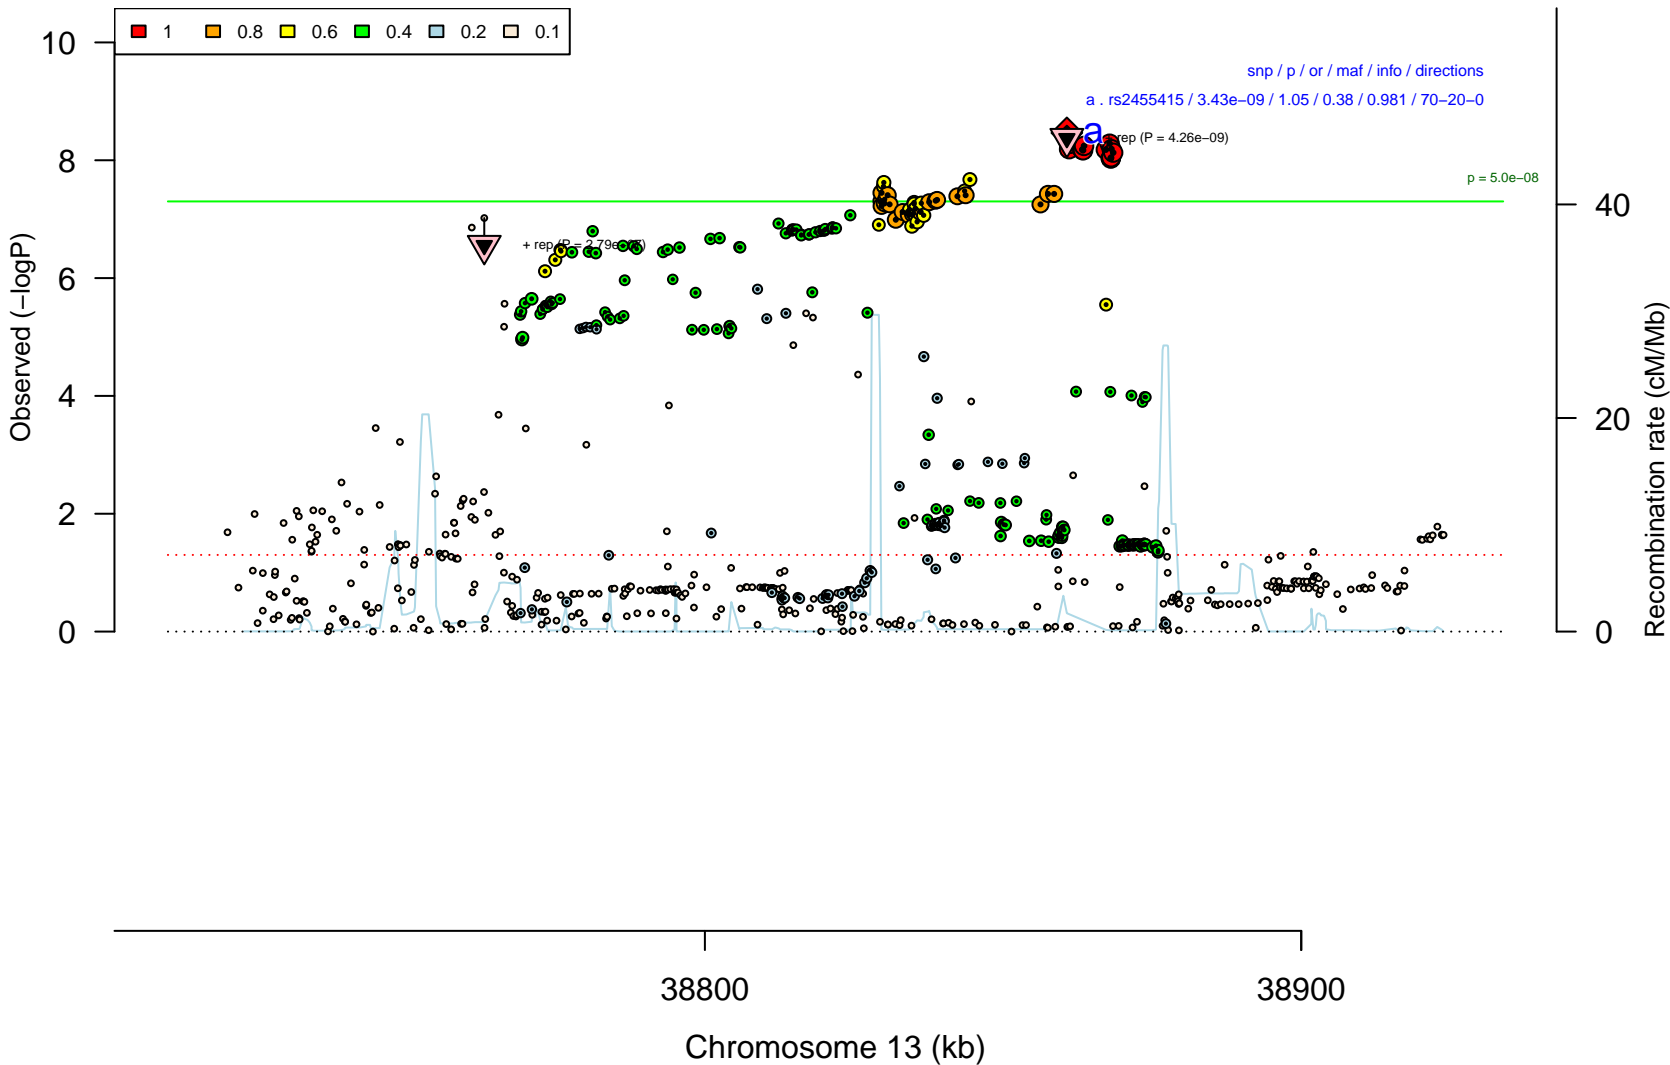

# PGC\_SCZ\_w3\_90\_0418b.188.chr12

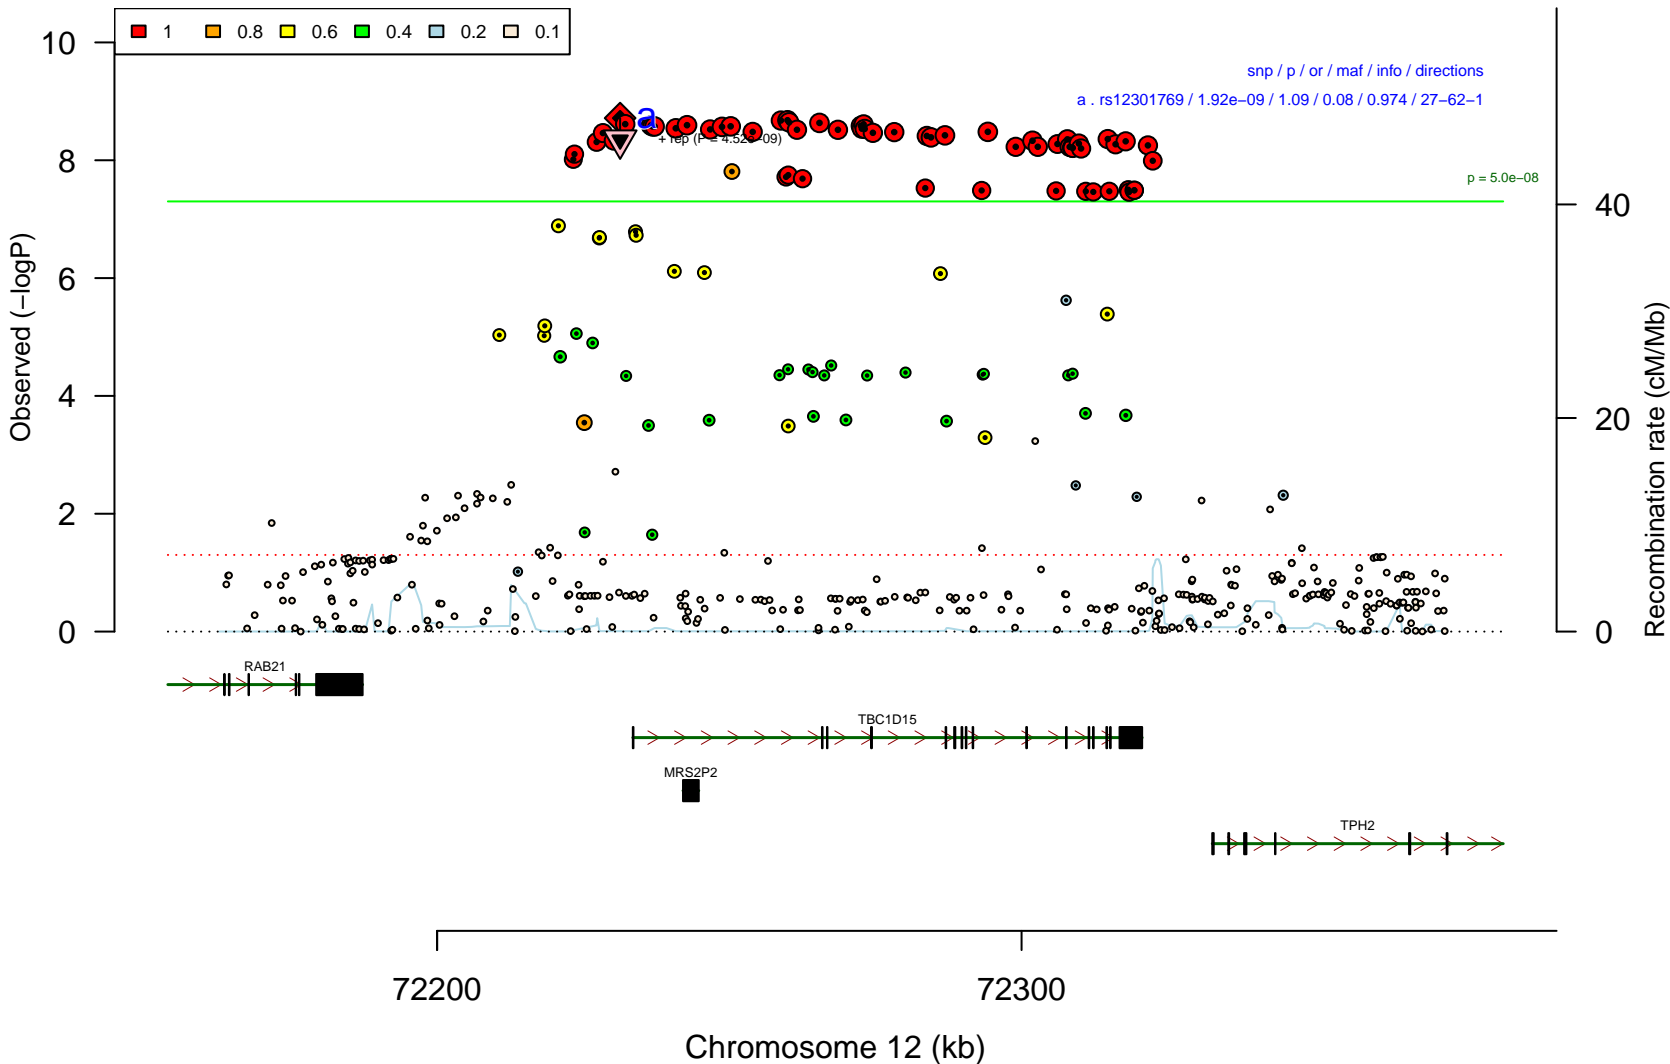

# PGC\_SCZ\_w3\_90\_0418b.185.chr12

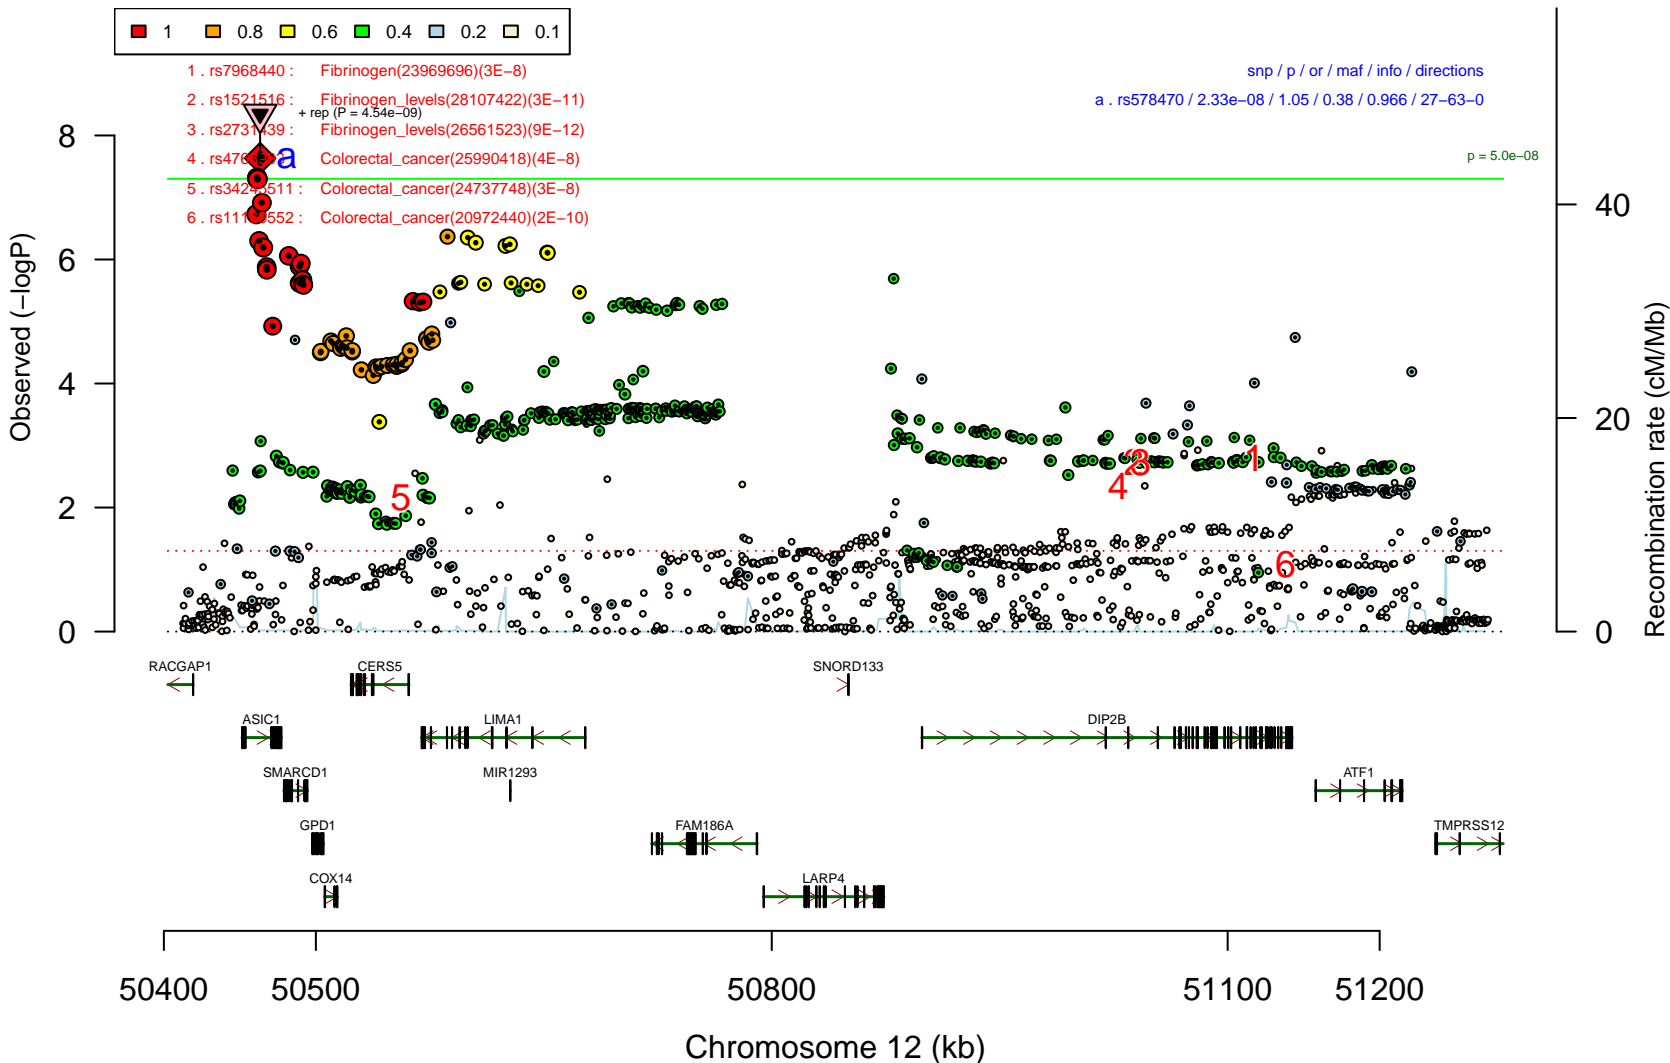

# PGC\_SCZ\_w3\_90\_0418b.60.chr3

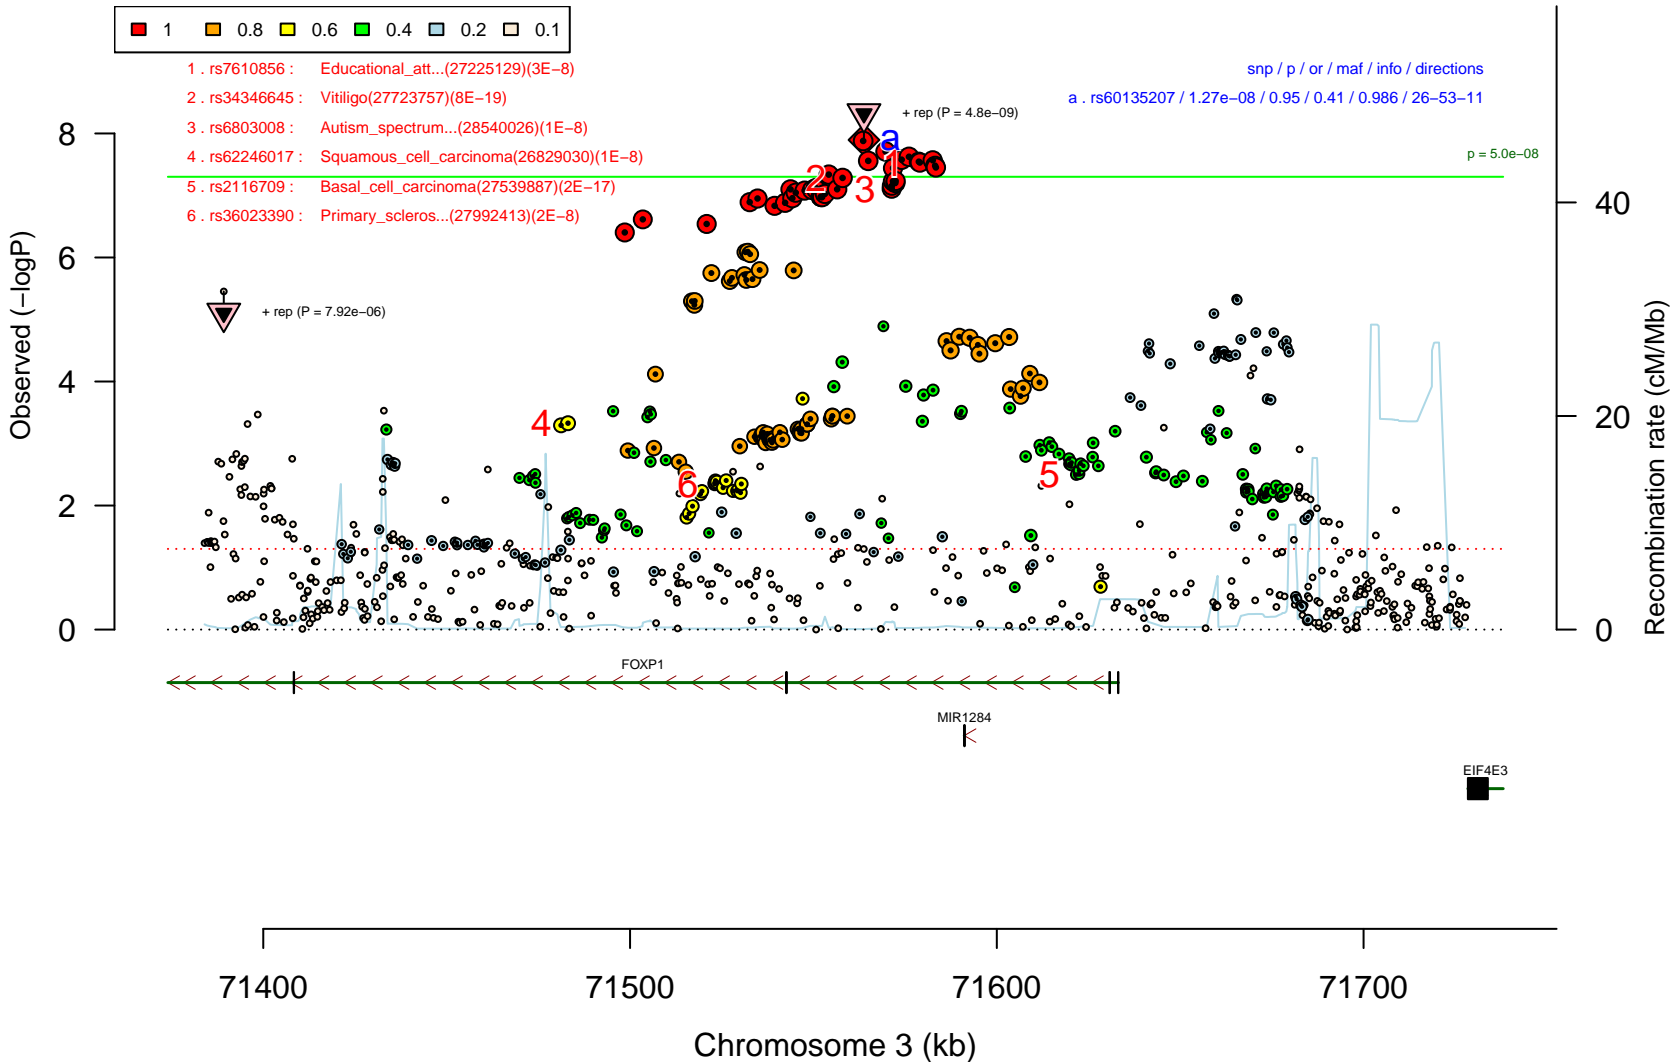

# PGC\_SCZ\_w3\_90\_0418b.223.chr15

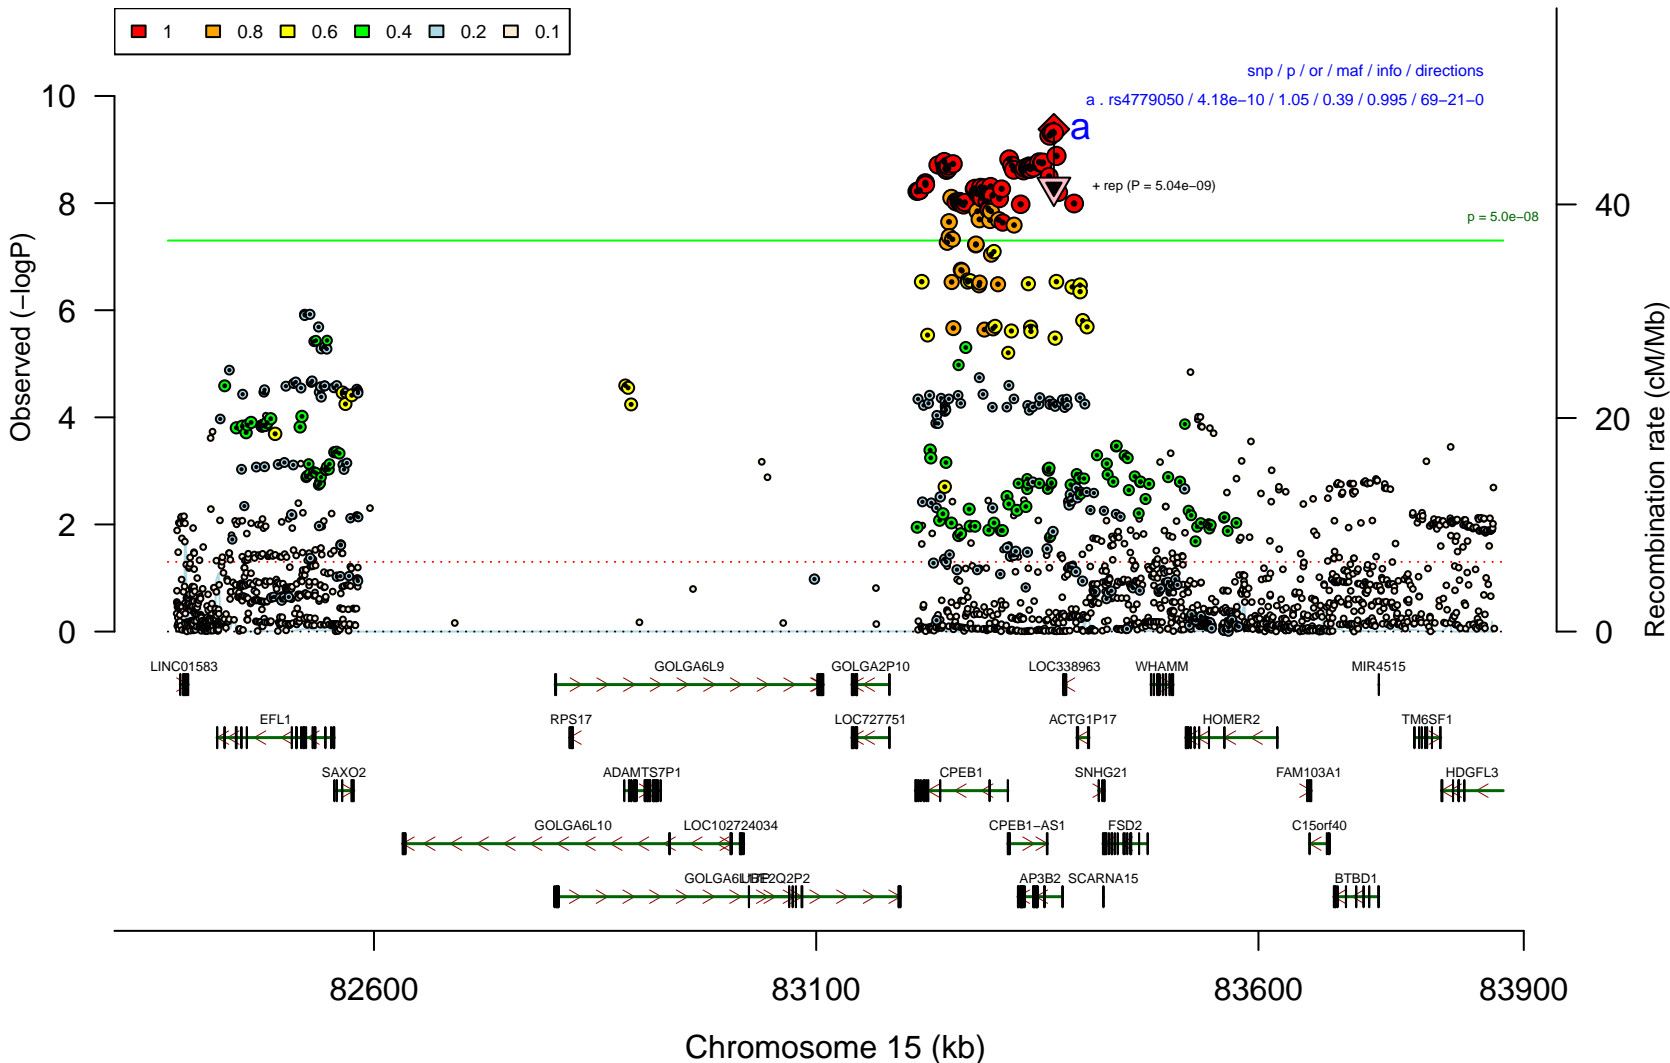

# PGC\_SCZ\_w3\_90\_0418b.214.chr14

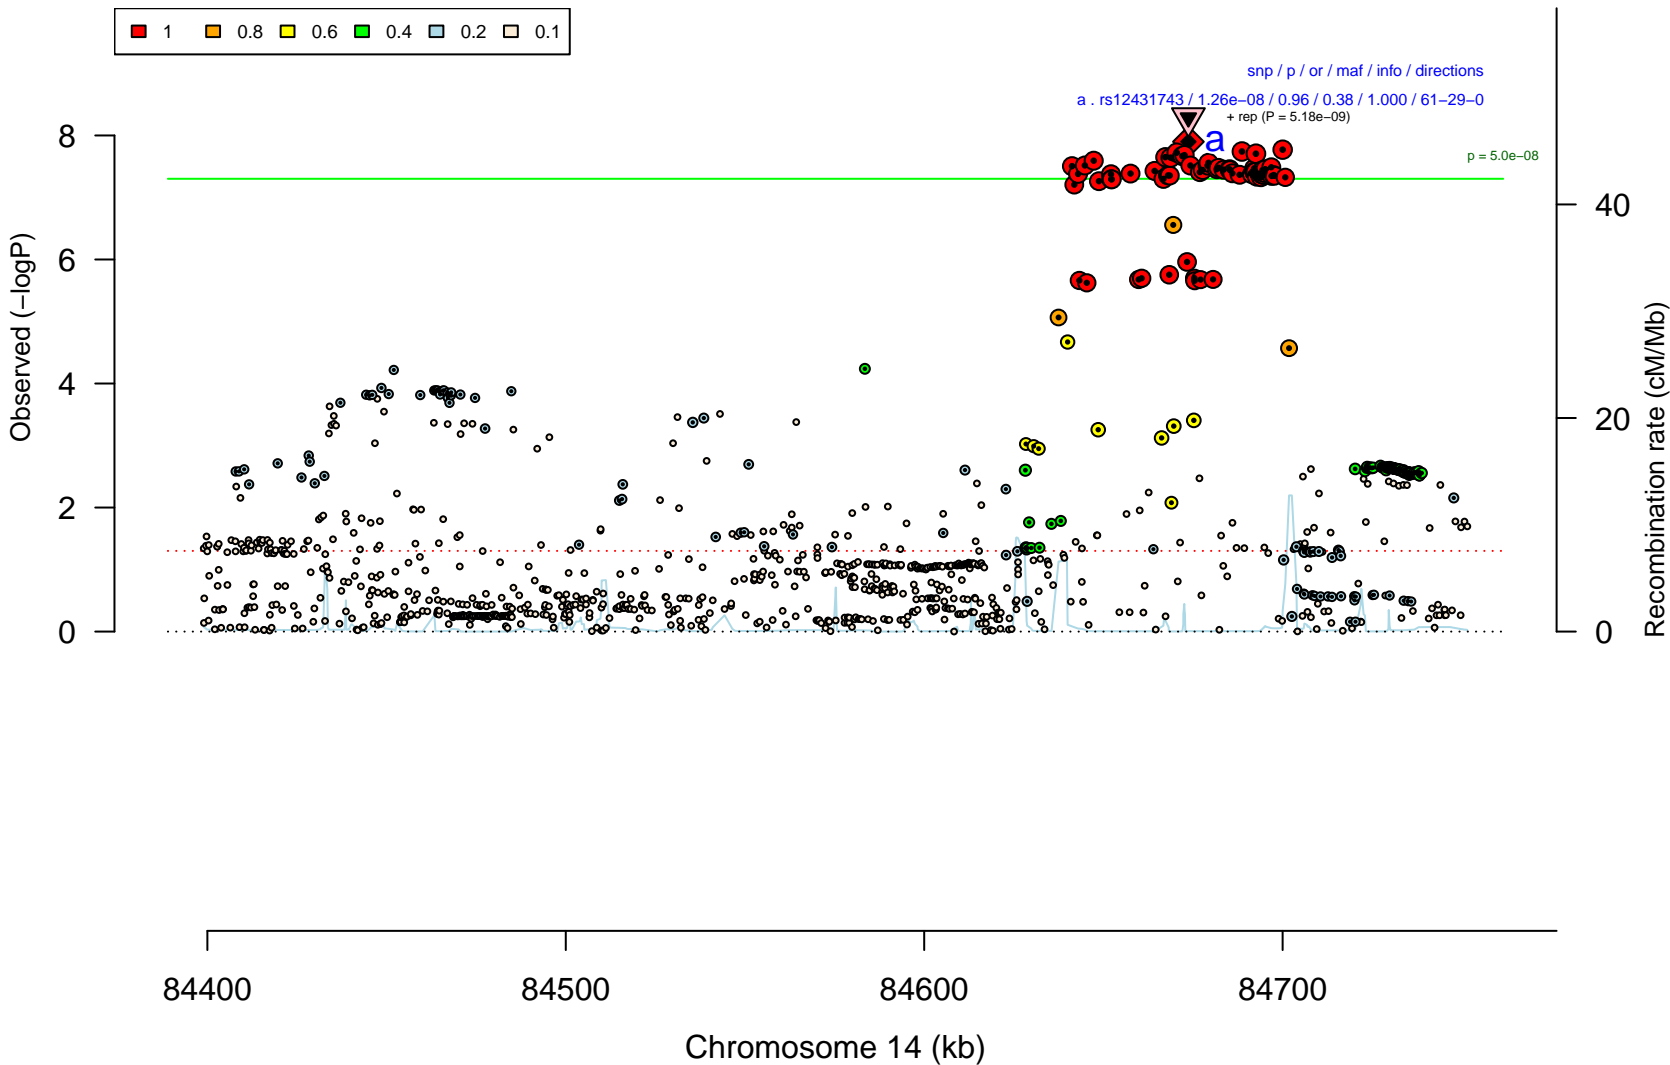



# PGC\_SCZ\_w3\_90\_0418b.163.chr10

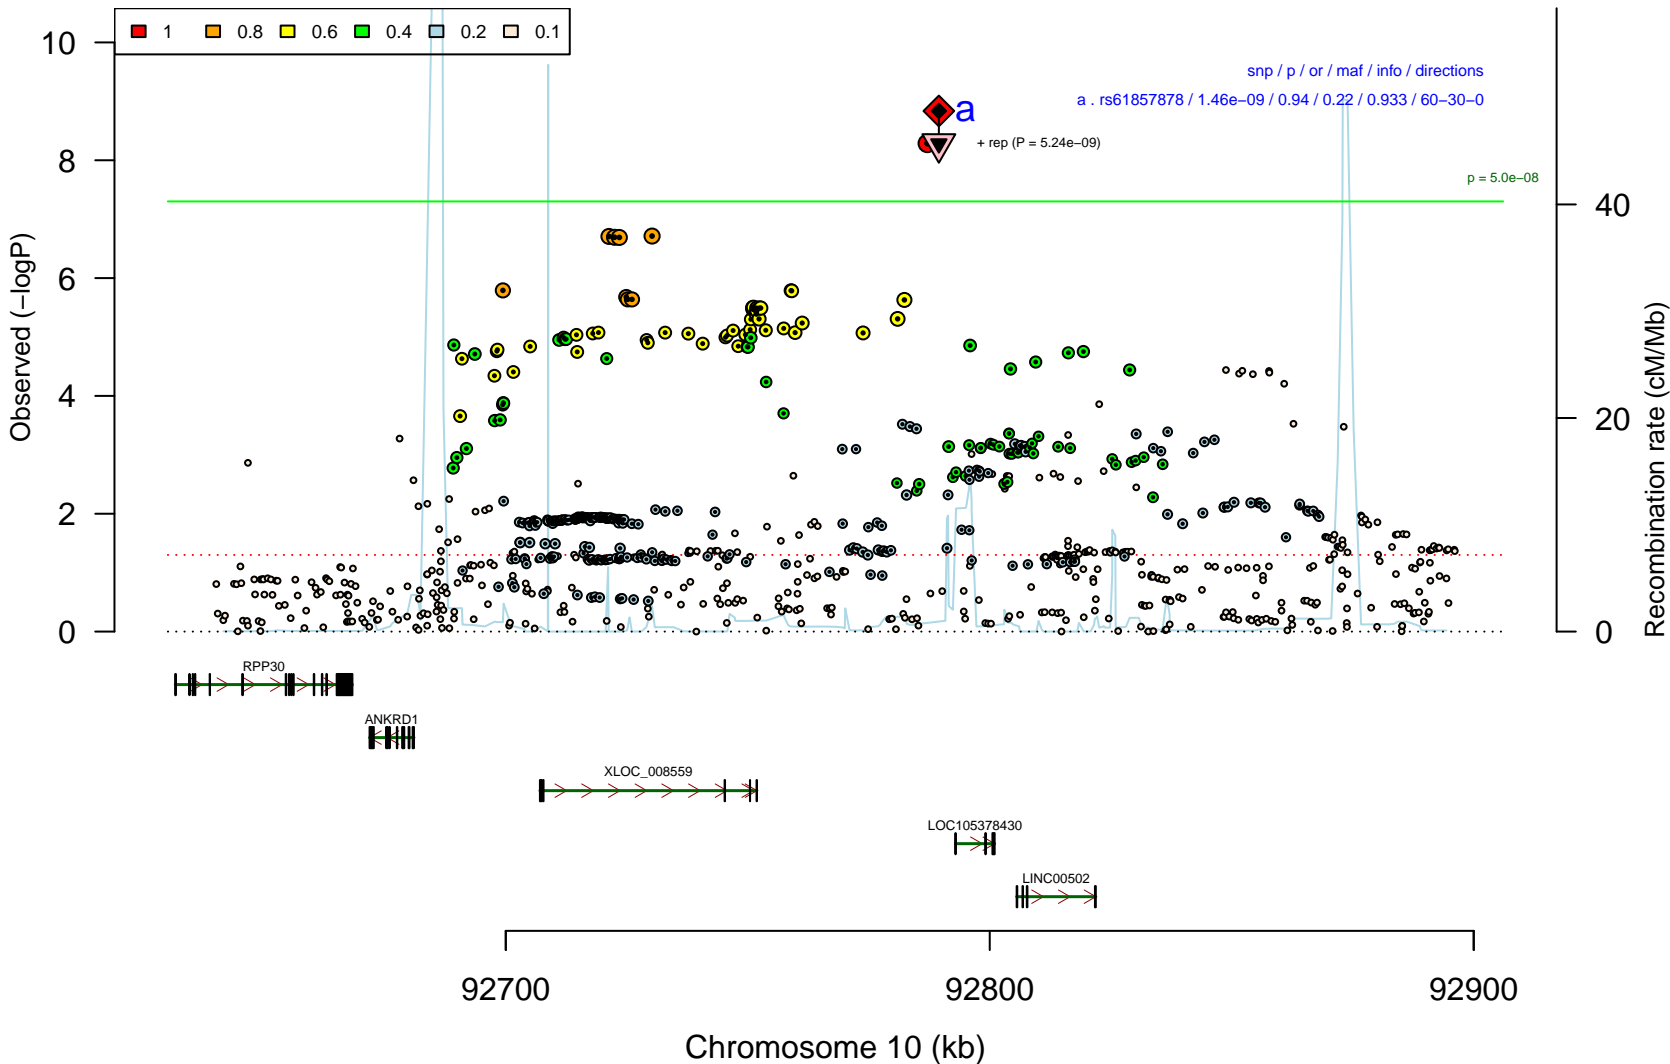

# PGC\_SCZ\_w3\_90\_0418b.202.chr13

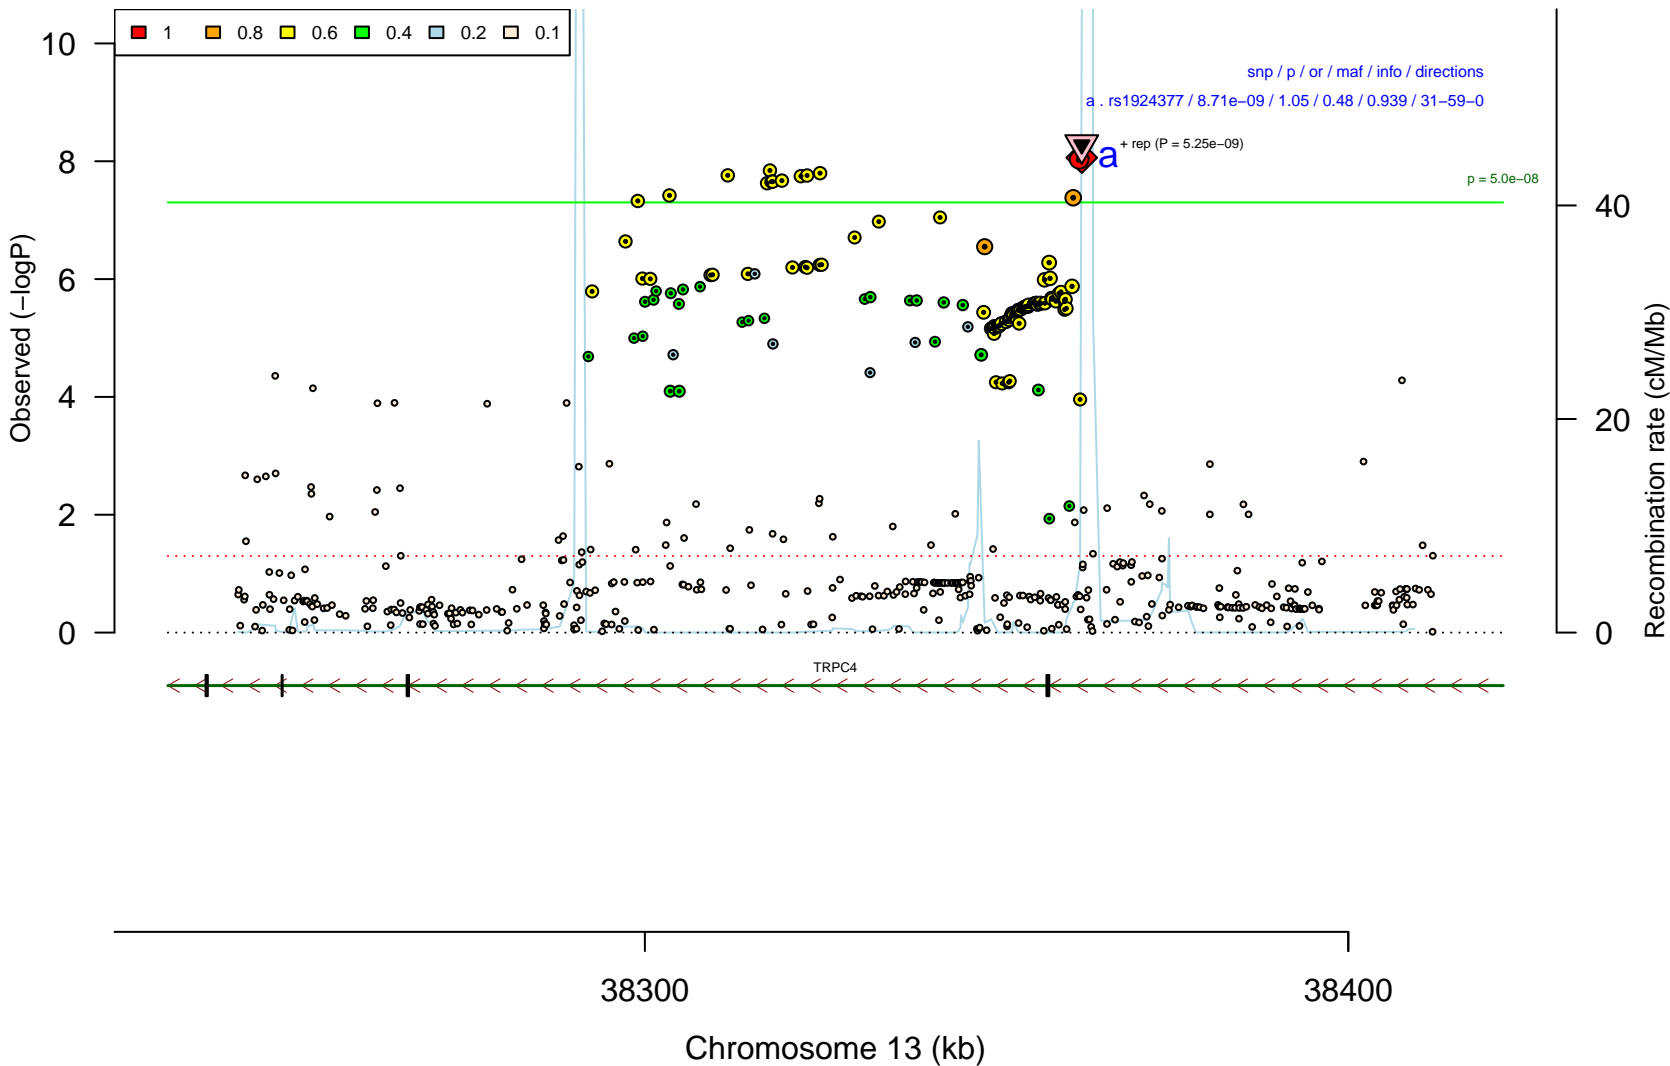

# PGC\_SCZ\_w3\_90\_0418b.74.chr4

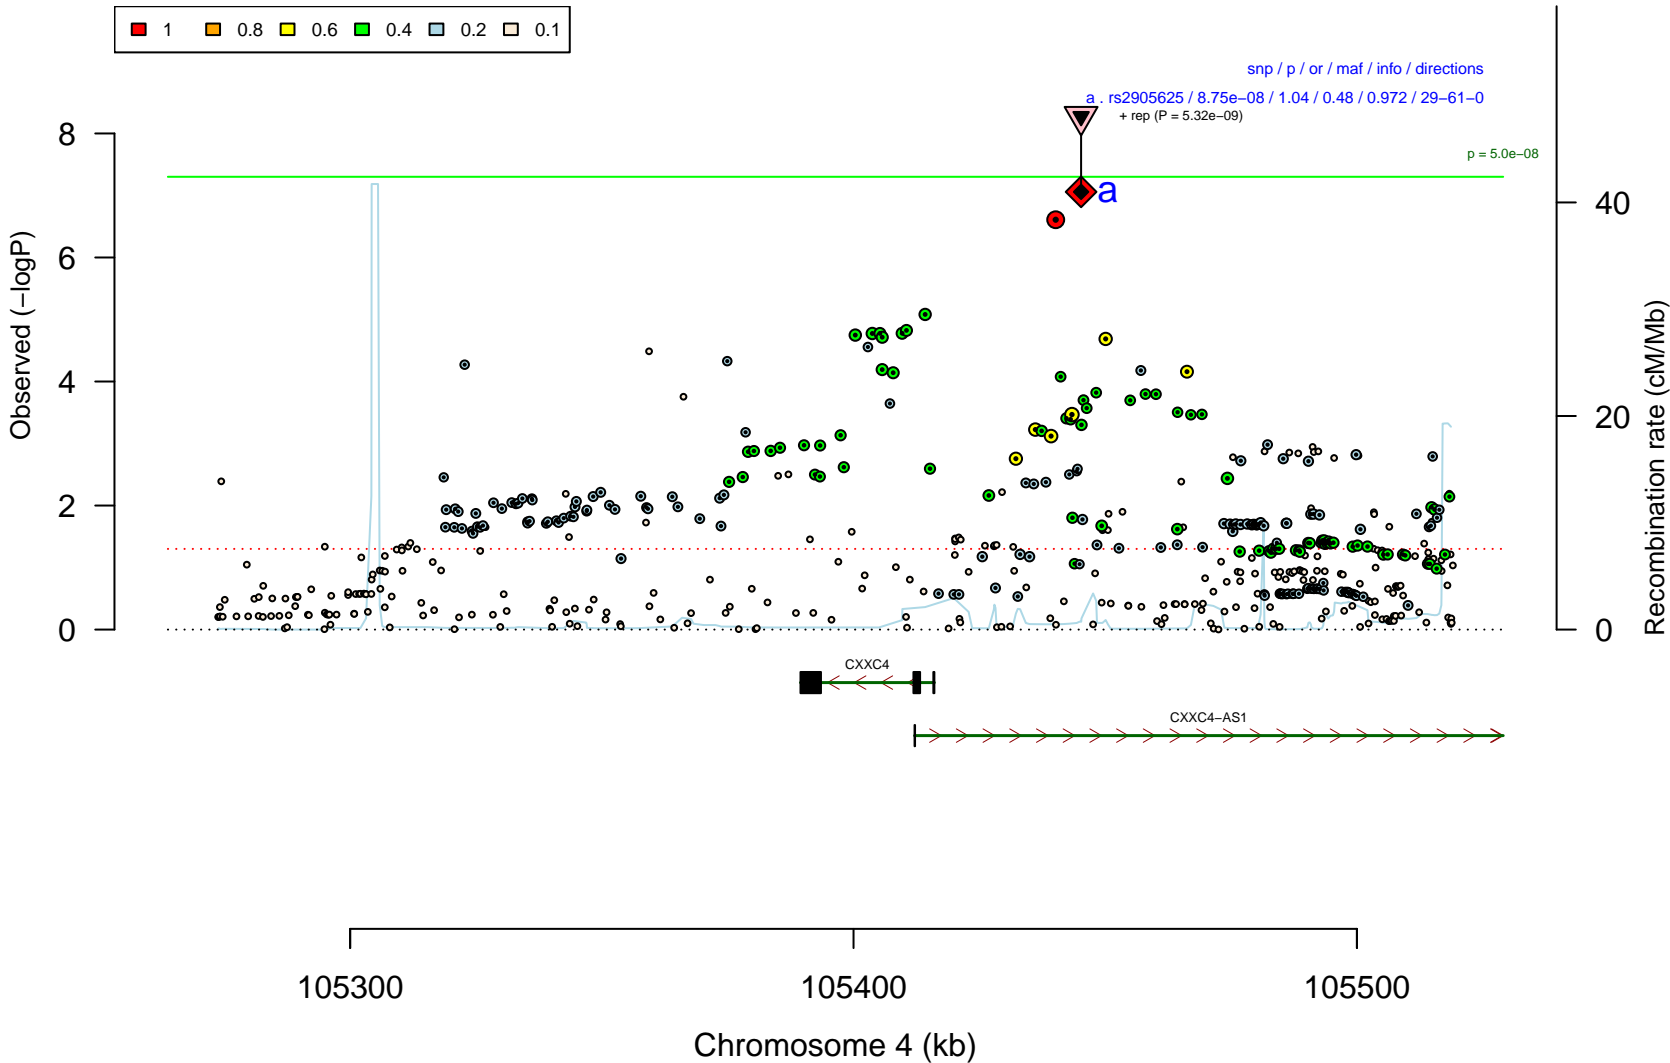

# PGC\_SCZ\_w3\_90\_0418b.35.chr2

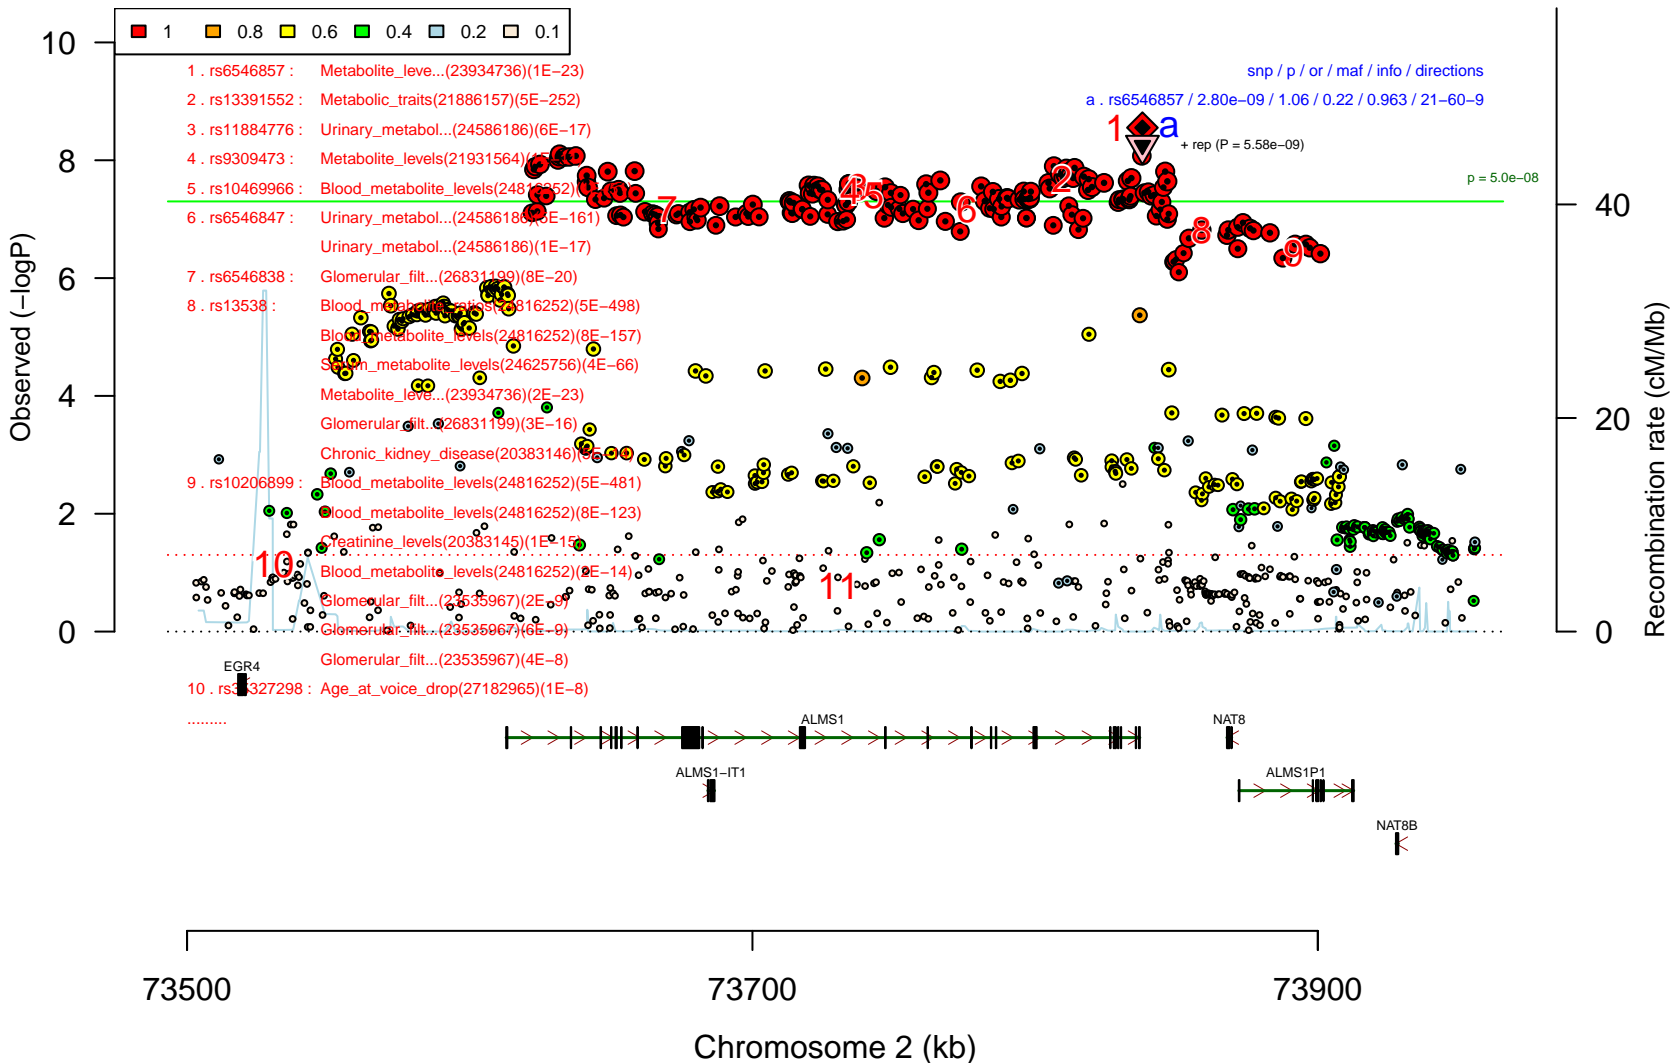

# PGC\_SCZ\_w3\_90\_0418b.121.chr7

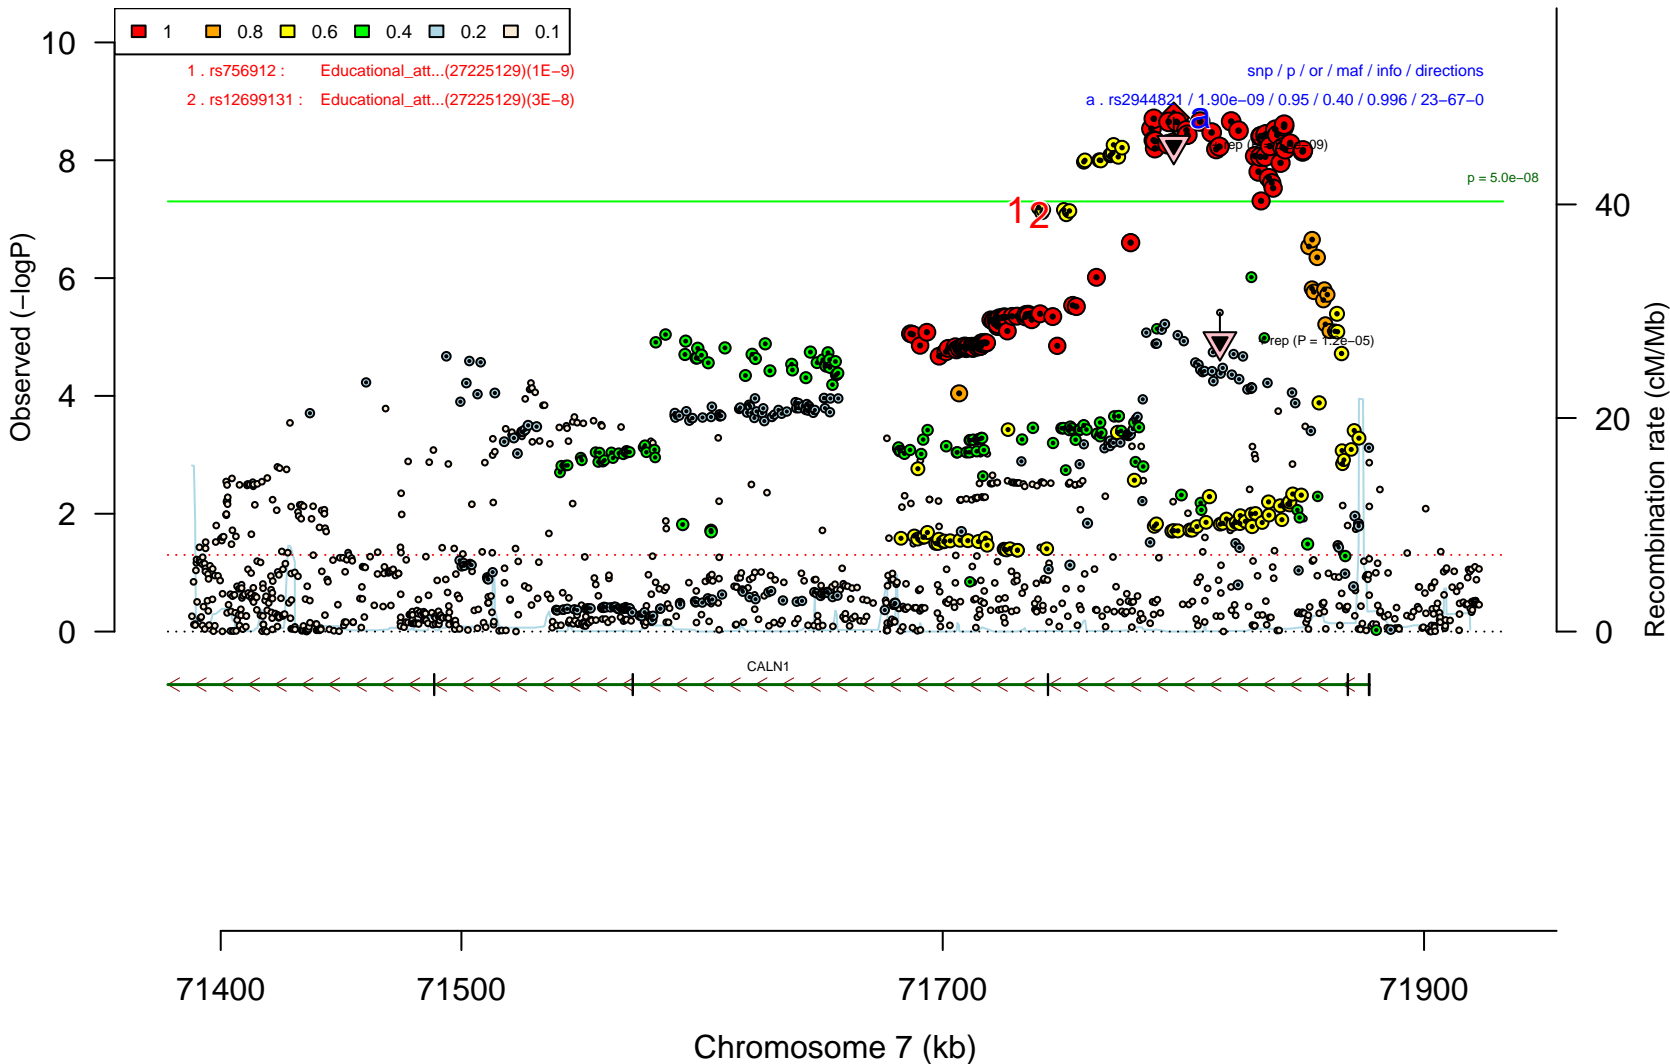

# PGC\_SCZ\_w3\_90\_0418b.69.chr4

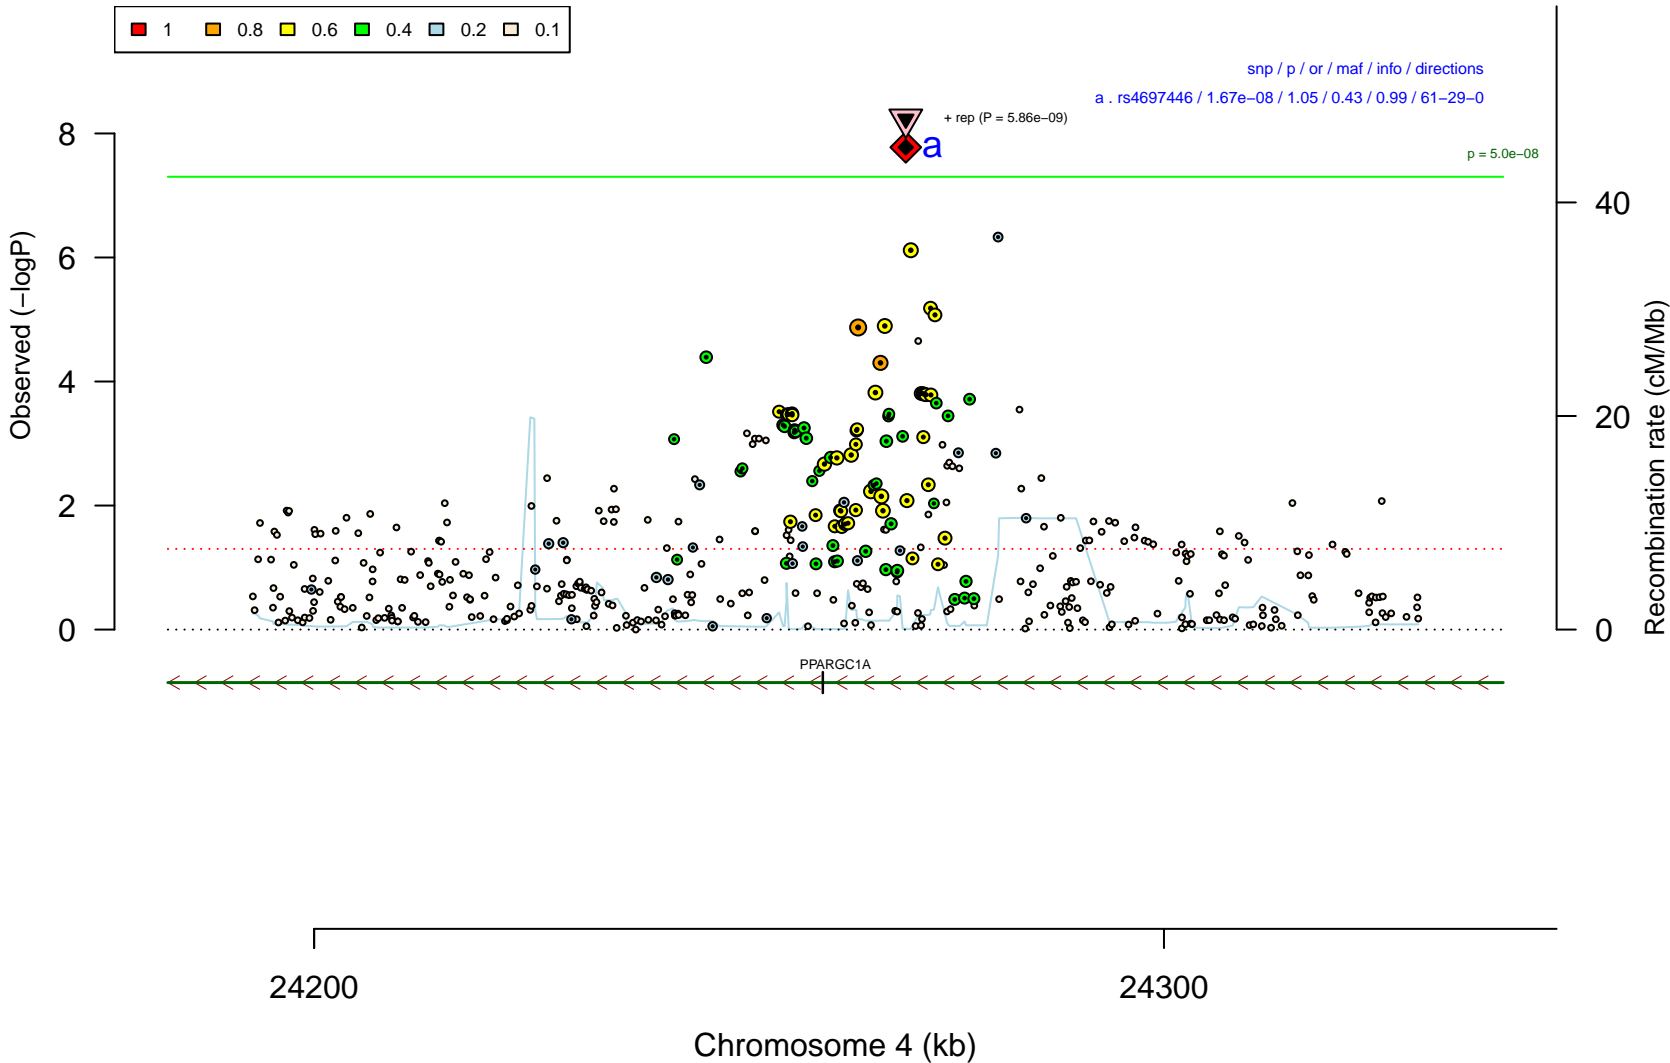

# PGC\_SCZ\_w3\_90\_0418b.36.chr2

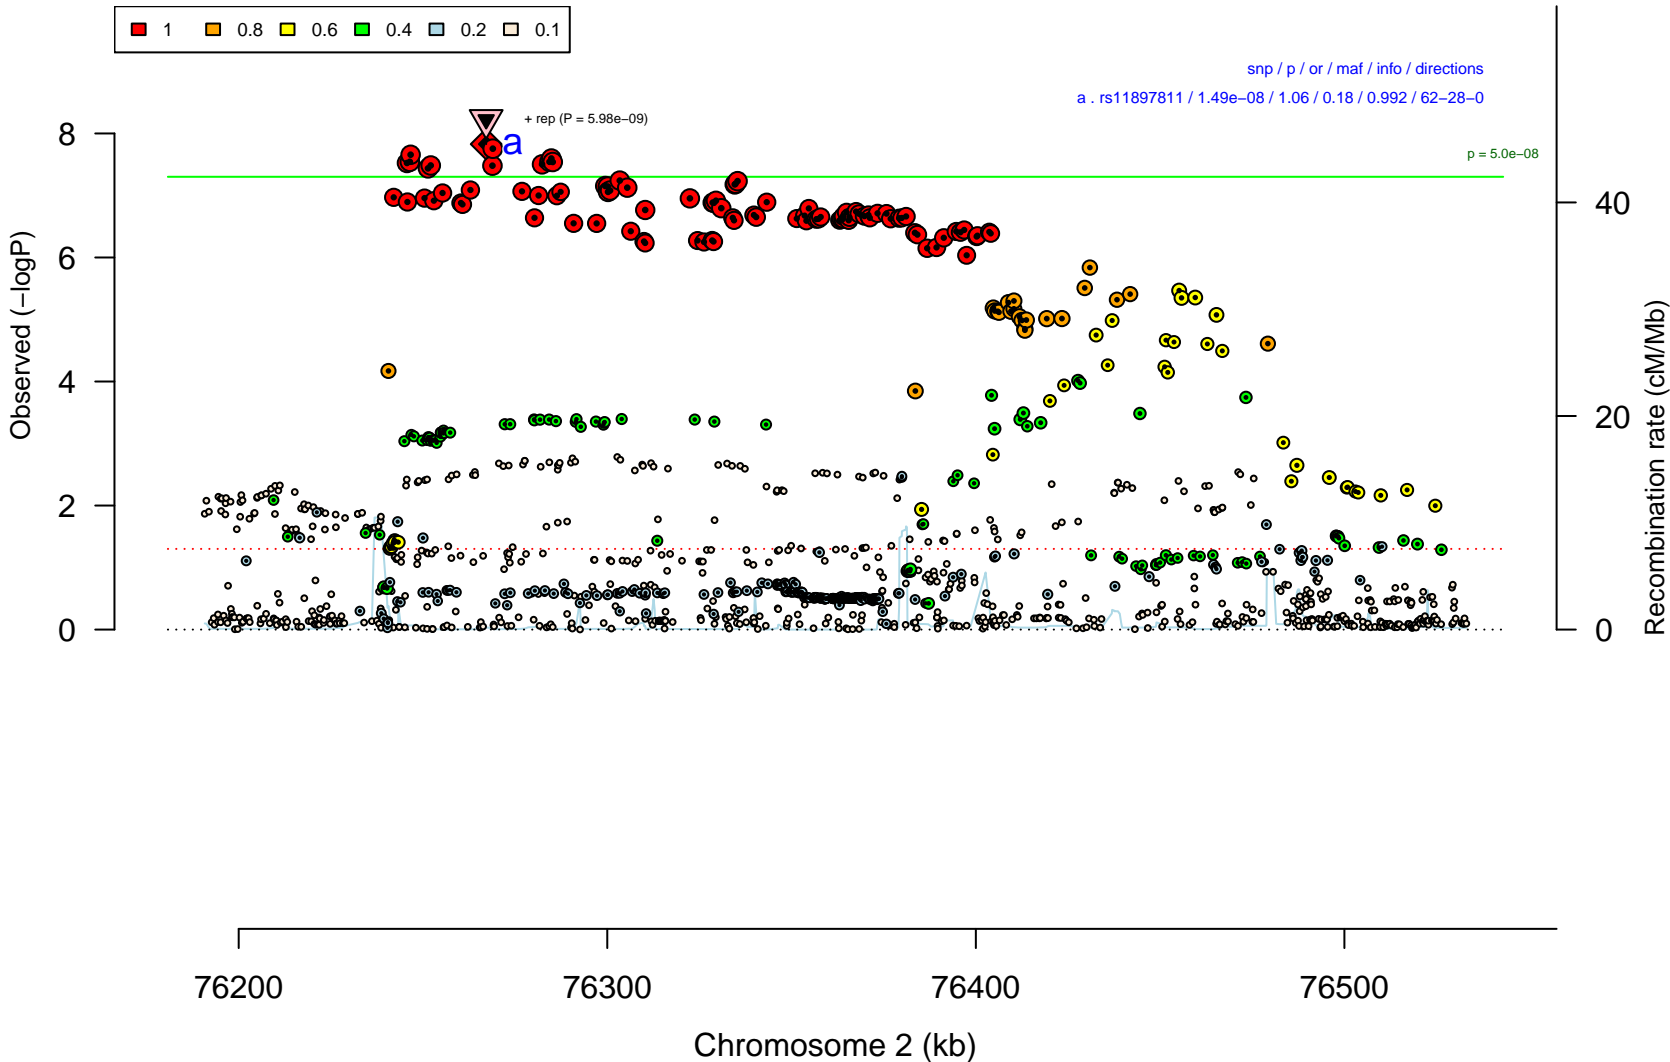

PGC SCZ w3 90 0418b.131.chr7

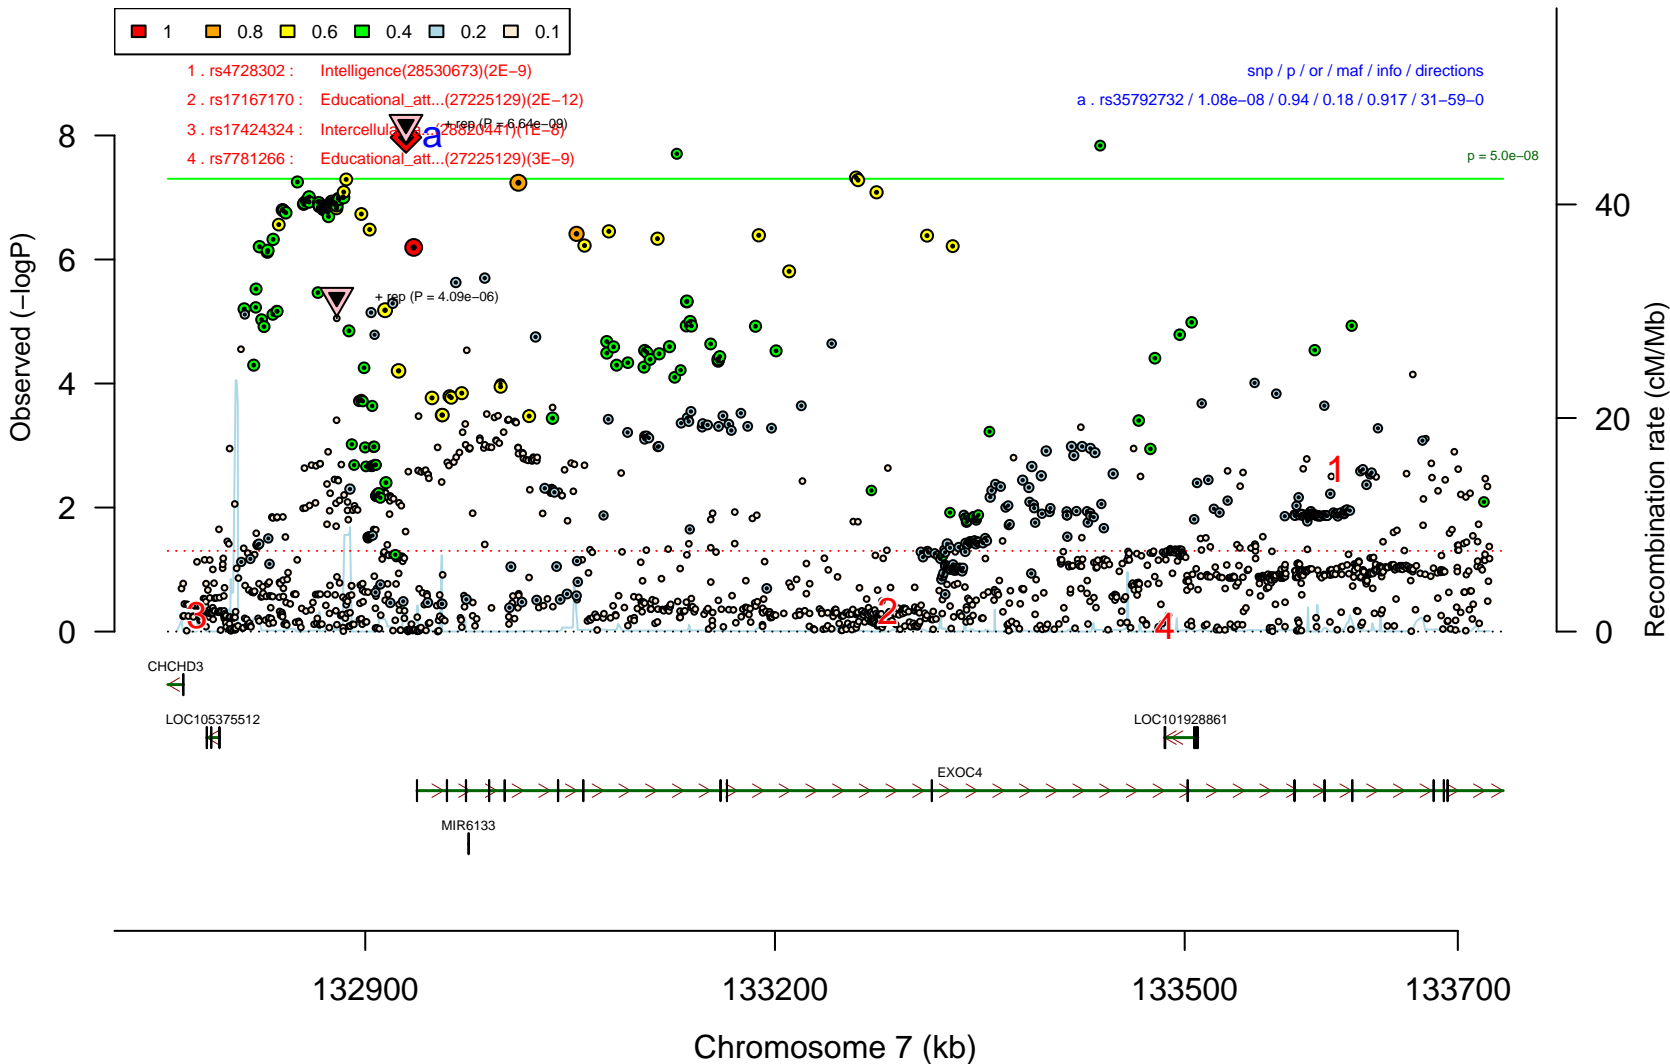



# PGC\_SCZ\_w3\_90\_0418b.88.chr5

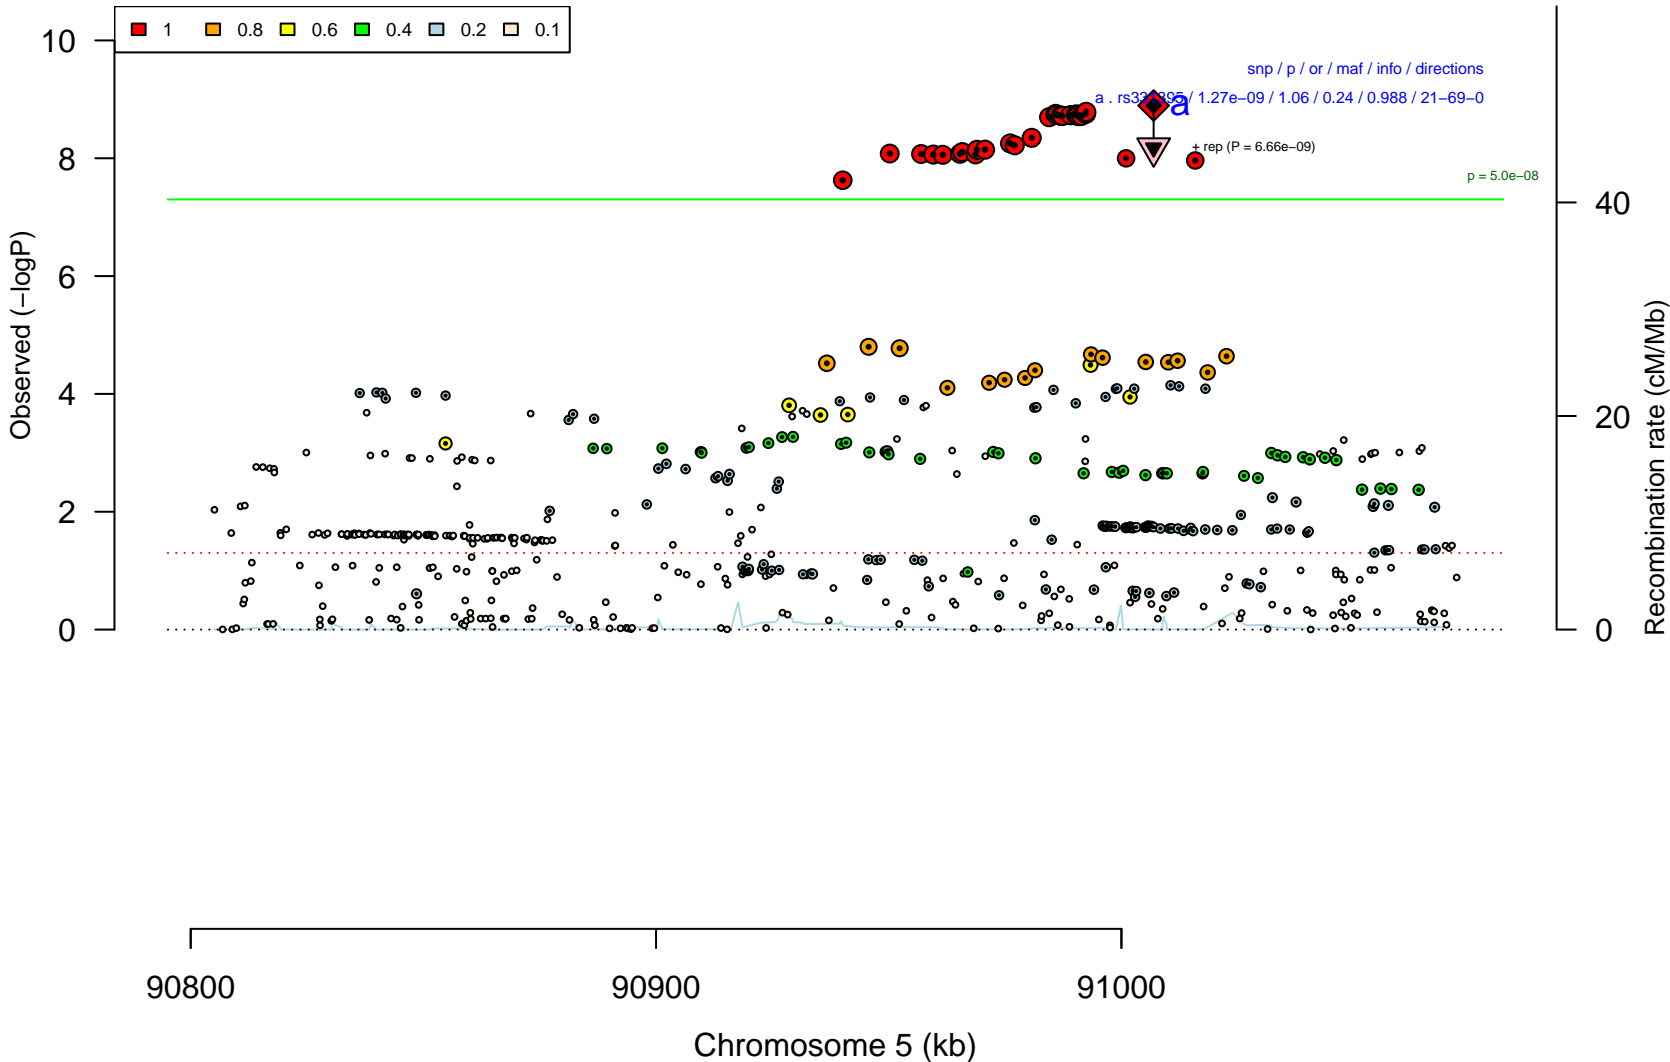

# PGC\_SCZ\_w3\_90\_0418b.15.chr1

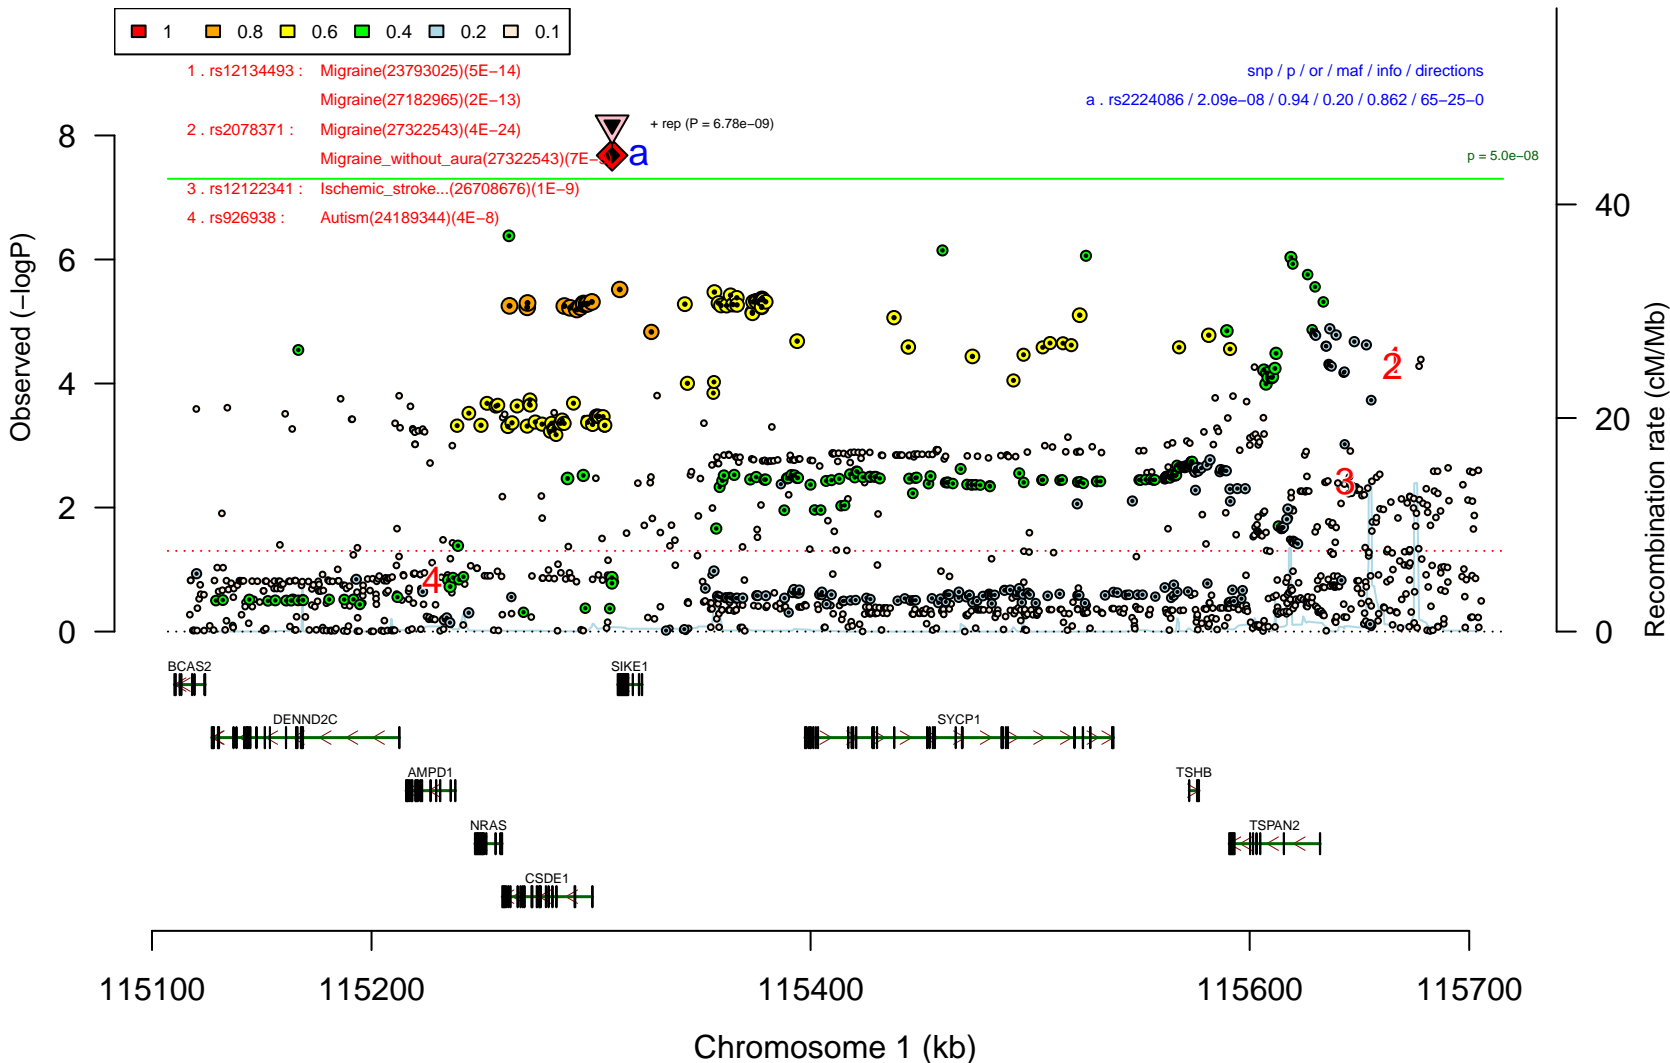

# PGC\_SCZ\_w3\_90\_0418b.261.chr21

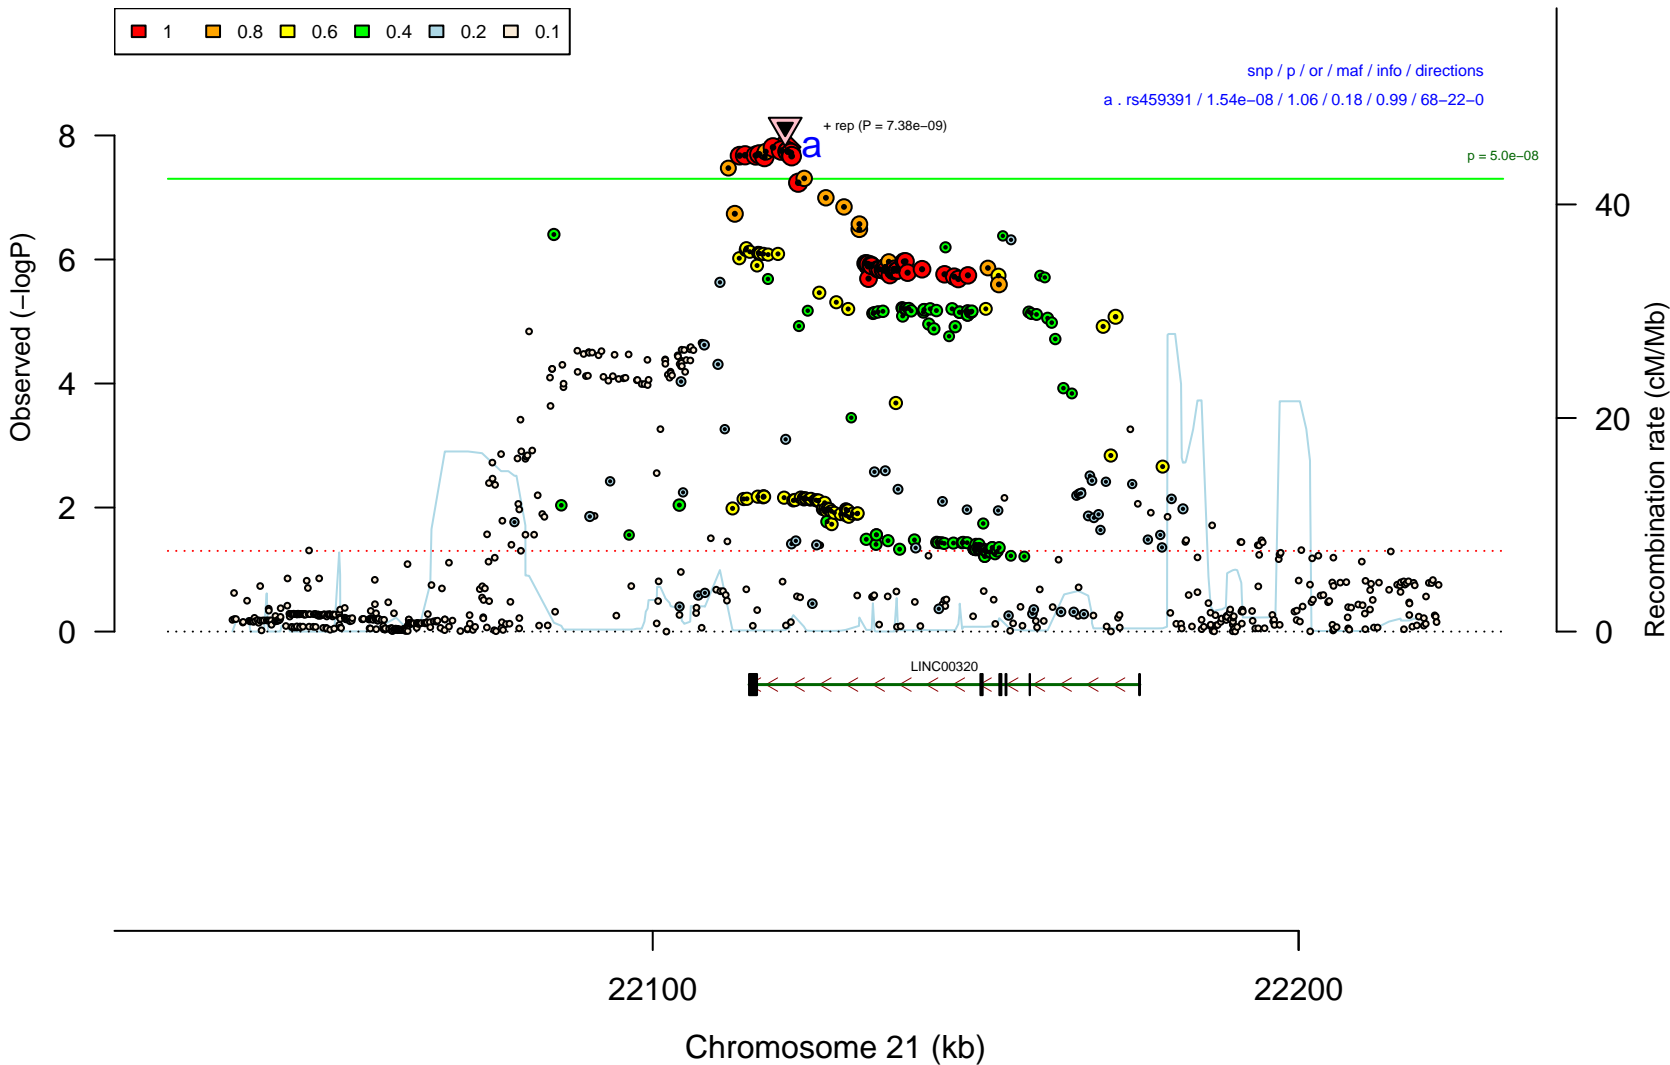

# PGC\_SCZ\_w3\_90\_0418b.68.chr4

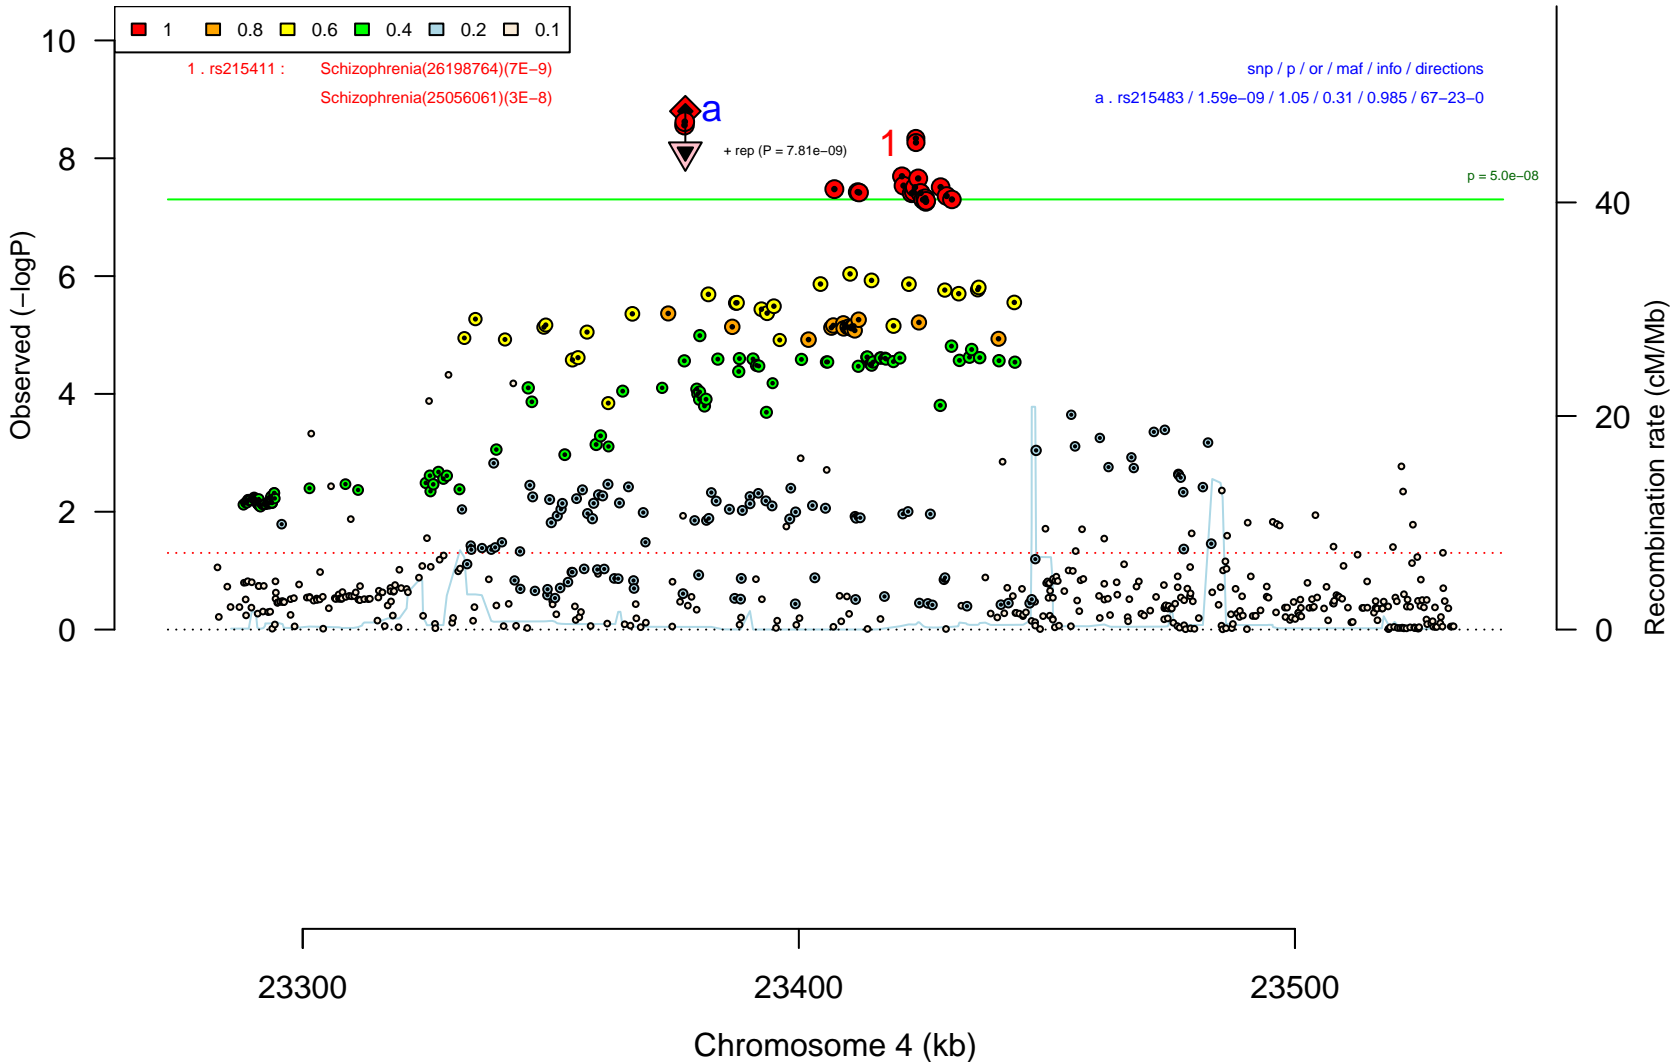

# PGC\_SCZ\_w3\_90\_0418b.93.chr5

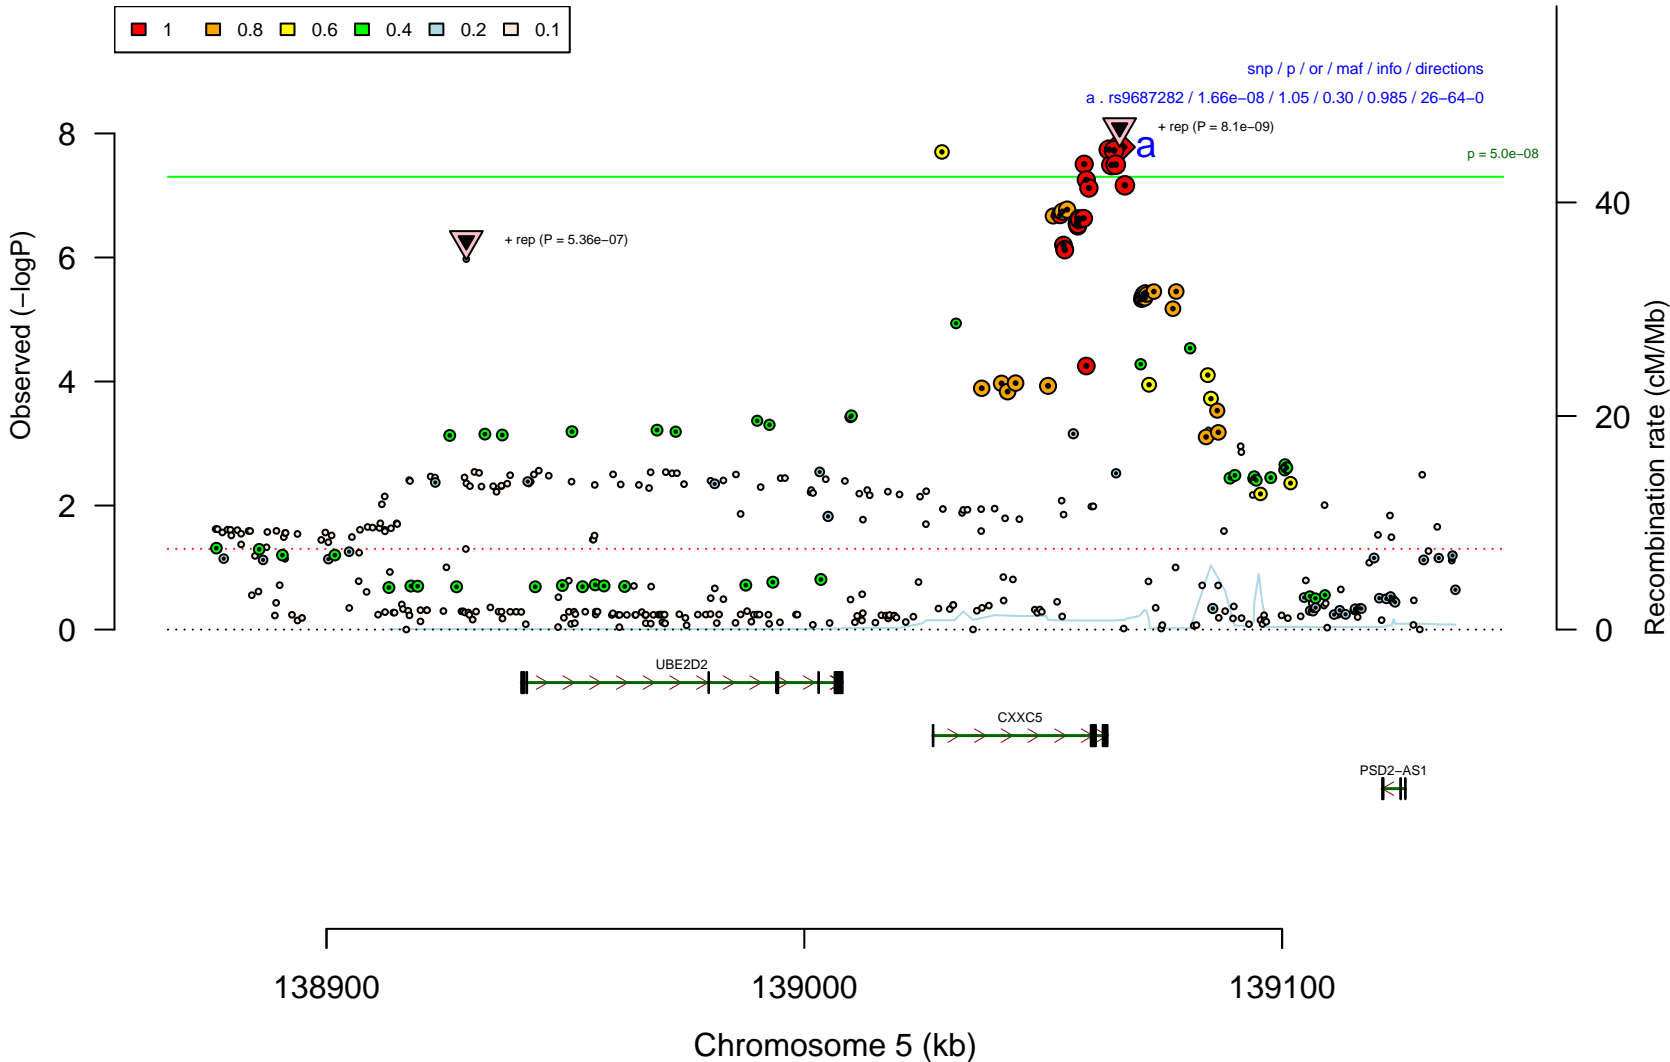

# PGC\_SCZ\_w3\_90\_0418b.2.chr1

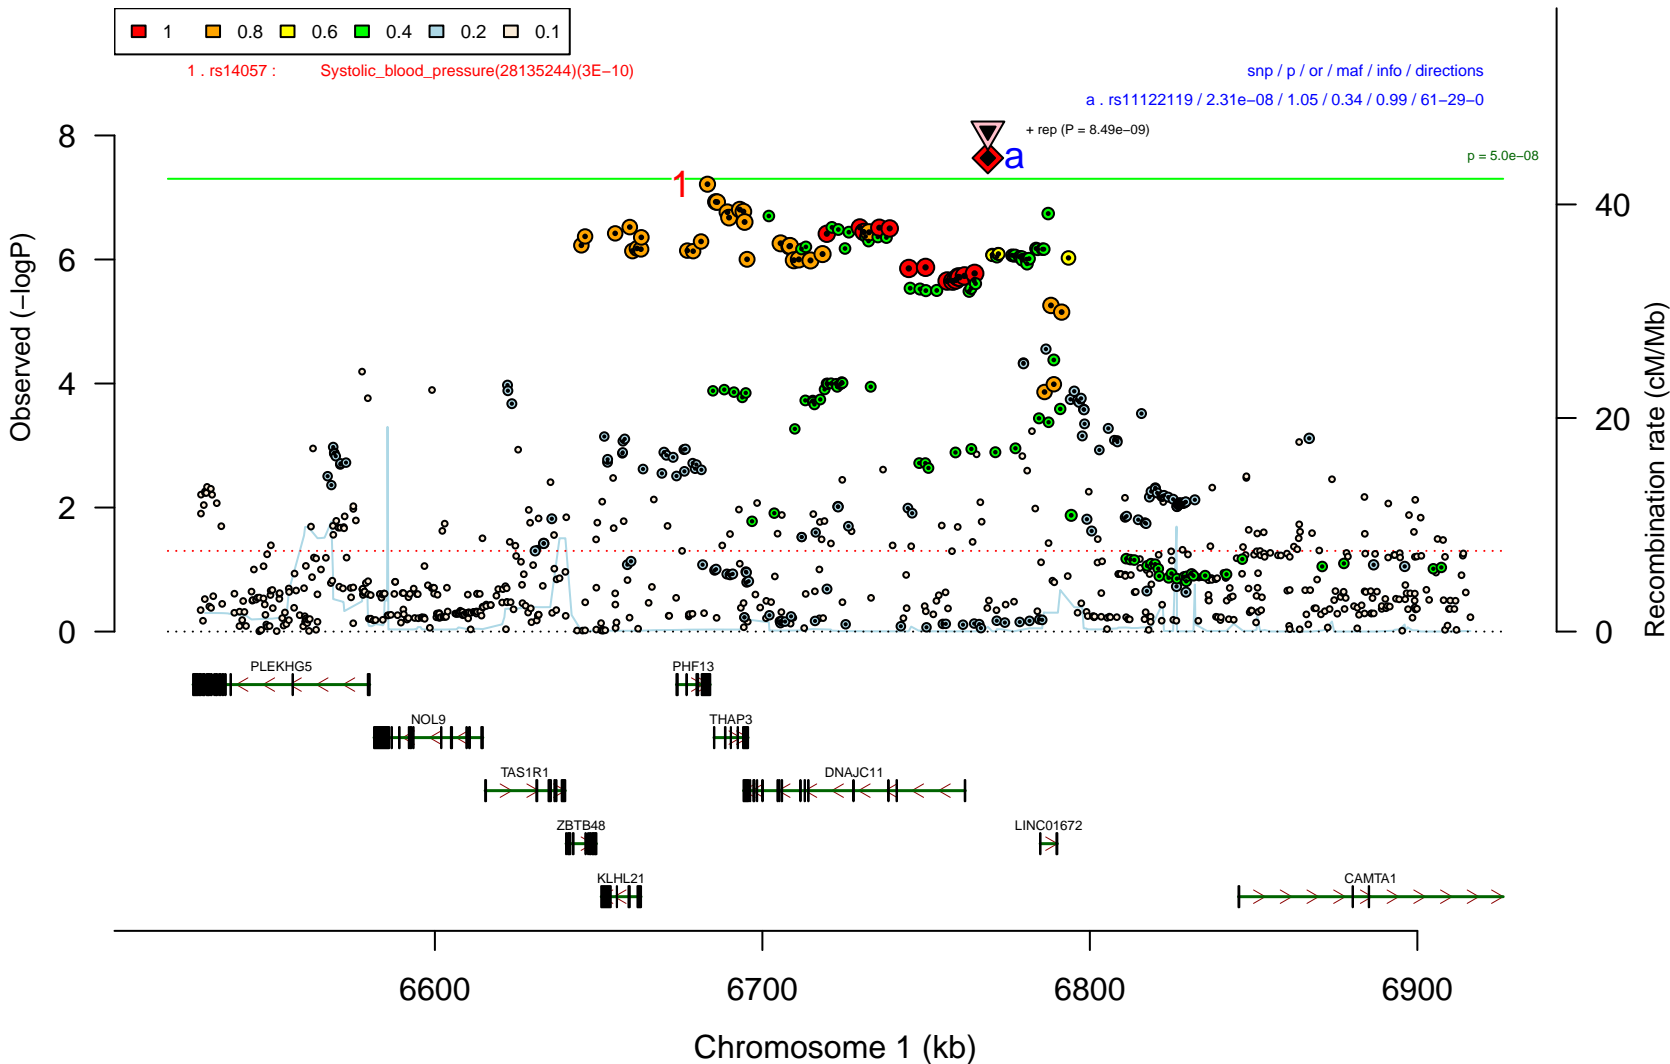

# PGC\_SCZ\_w3\_90\_0418b.233.chr16

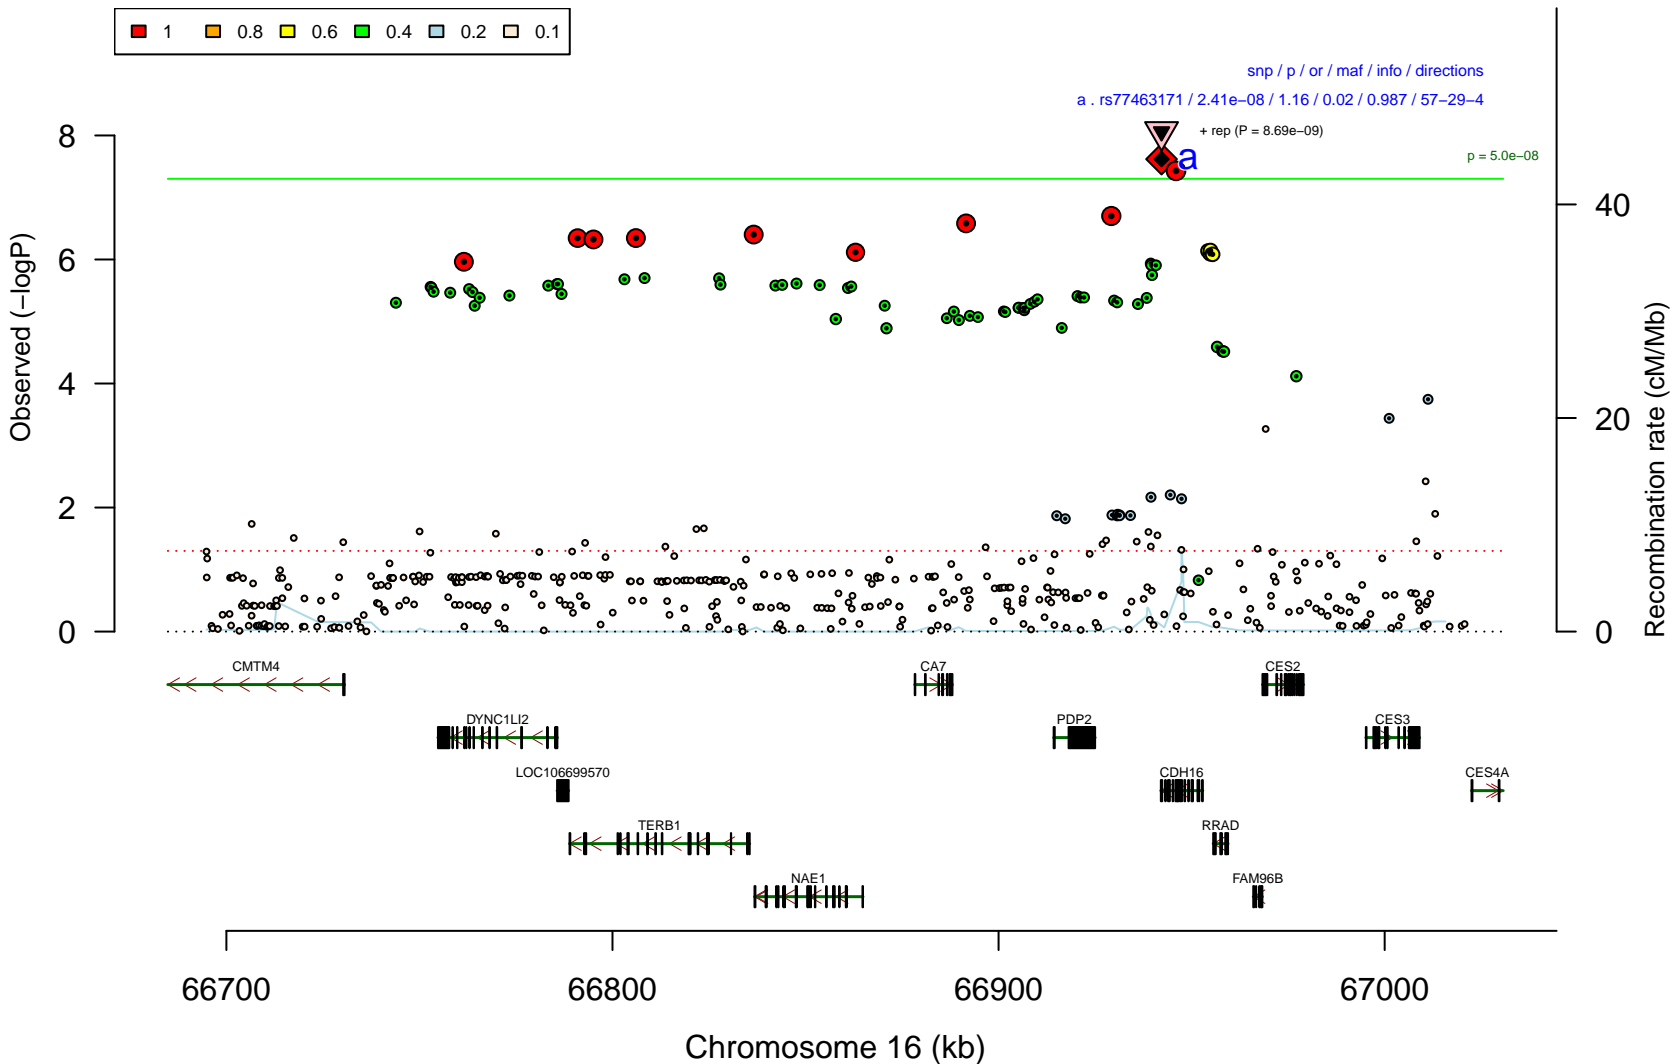

# PGC\_SCZ\_w3\_90\_0418b.19.chr1

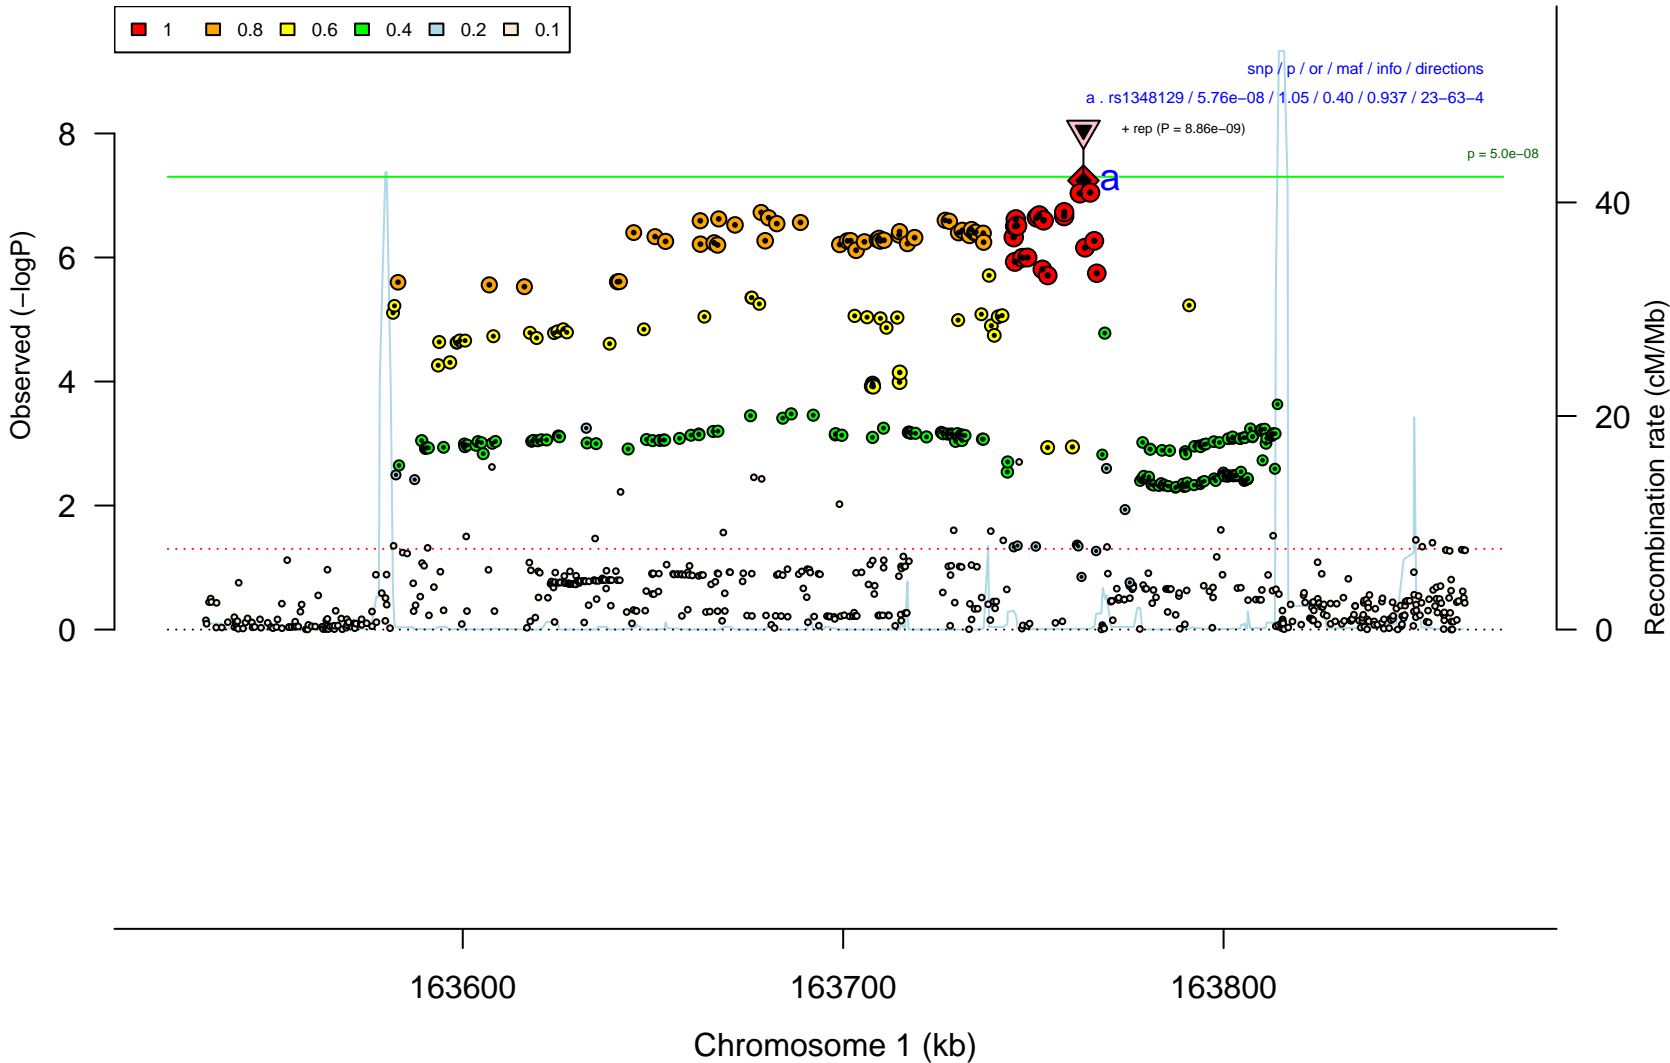



# PGC\_SCZ\_w3\_90\_0418b.45.chr2

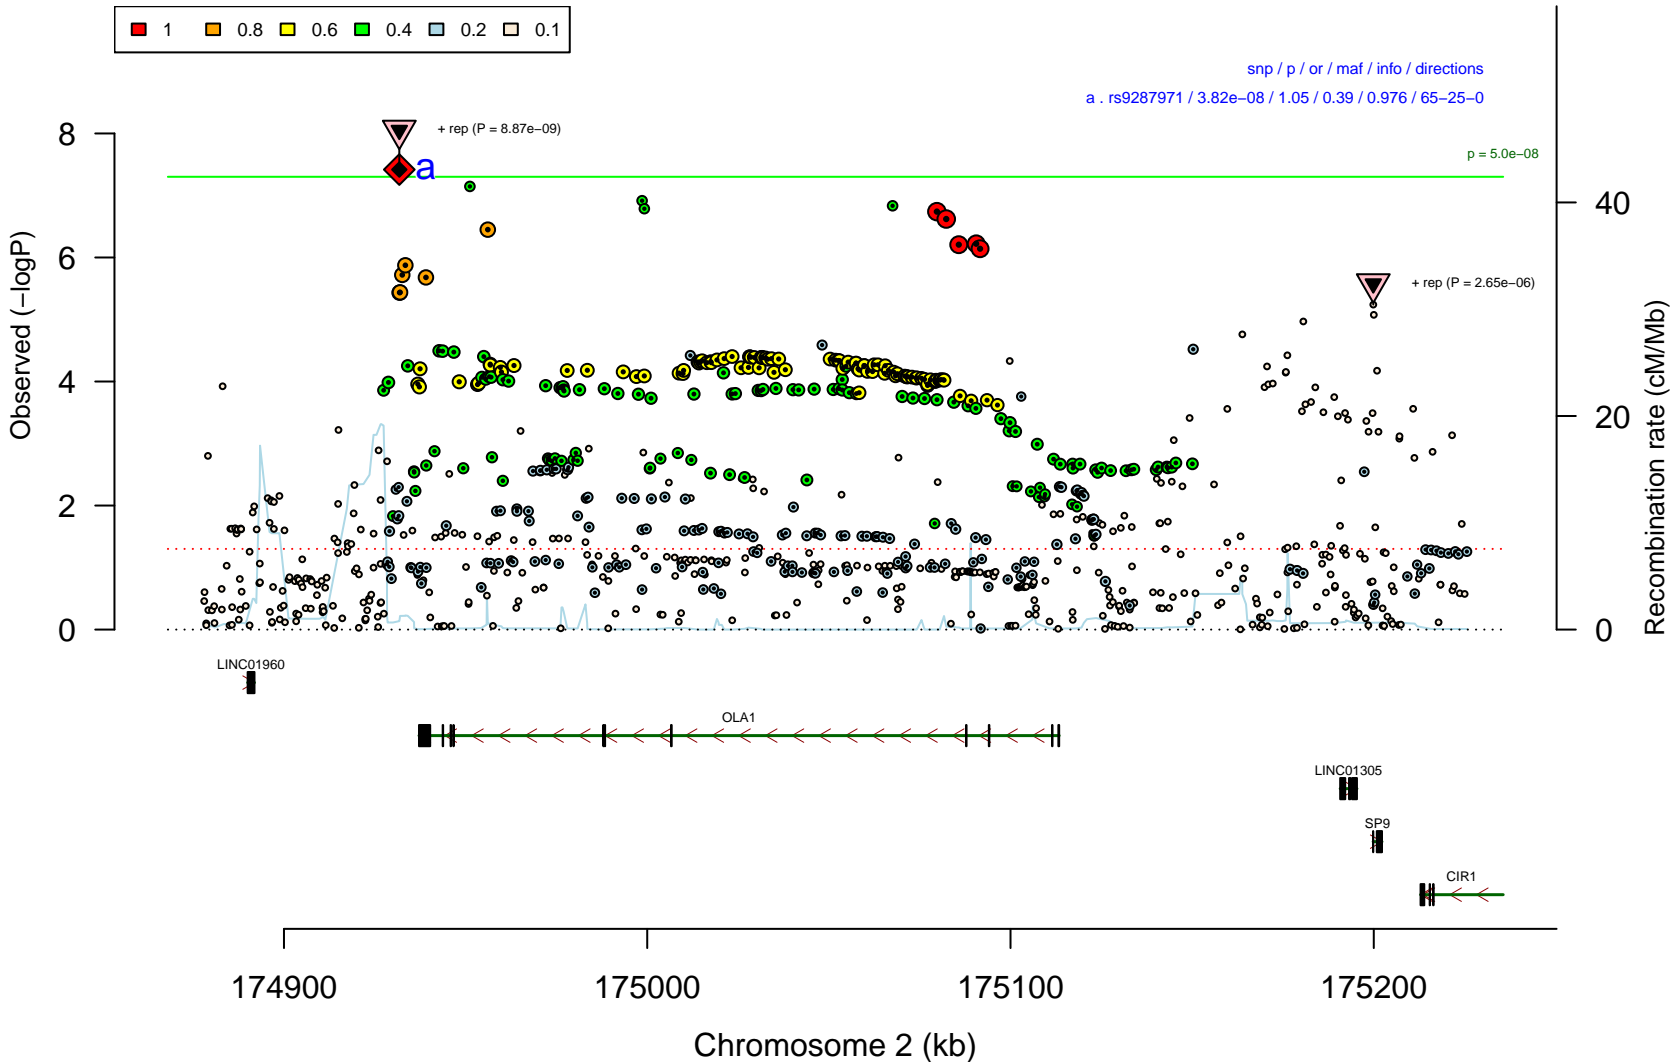

# PGC\_SCZ\_w3\_90\_0418b.120.chr7

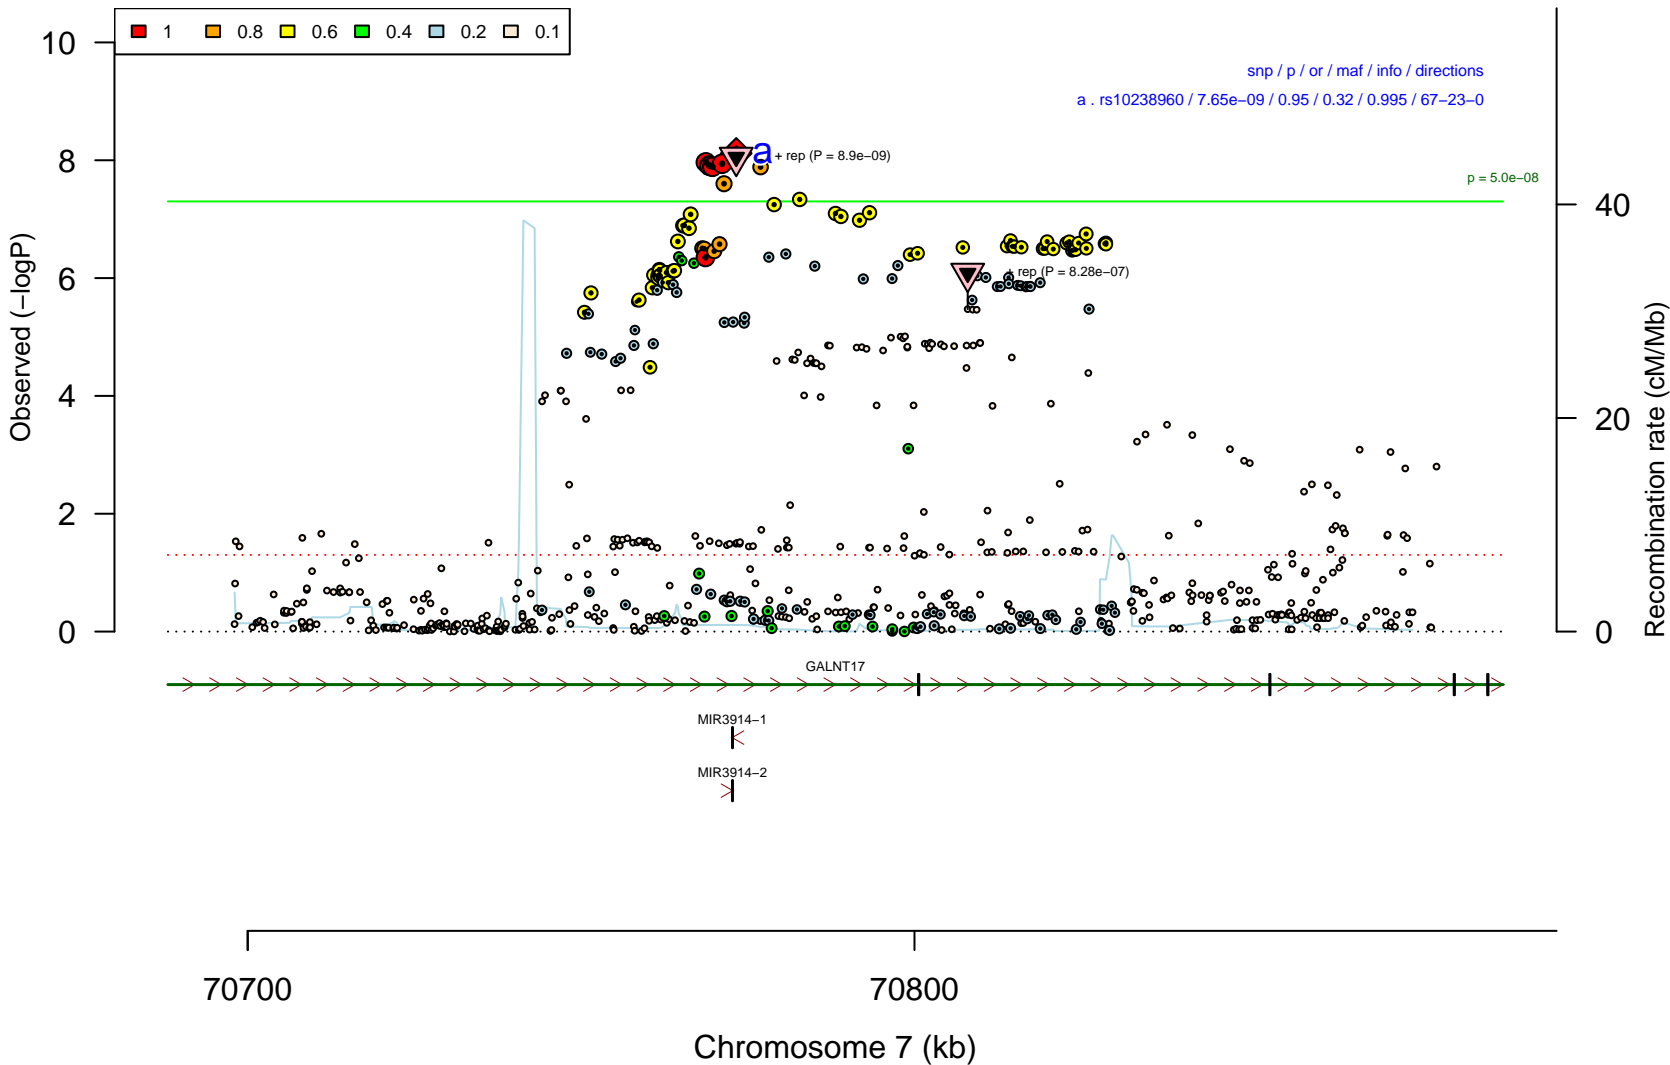

**PGC\_SCZ\_w3\_90\_0418b.115.chr6**

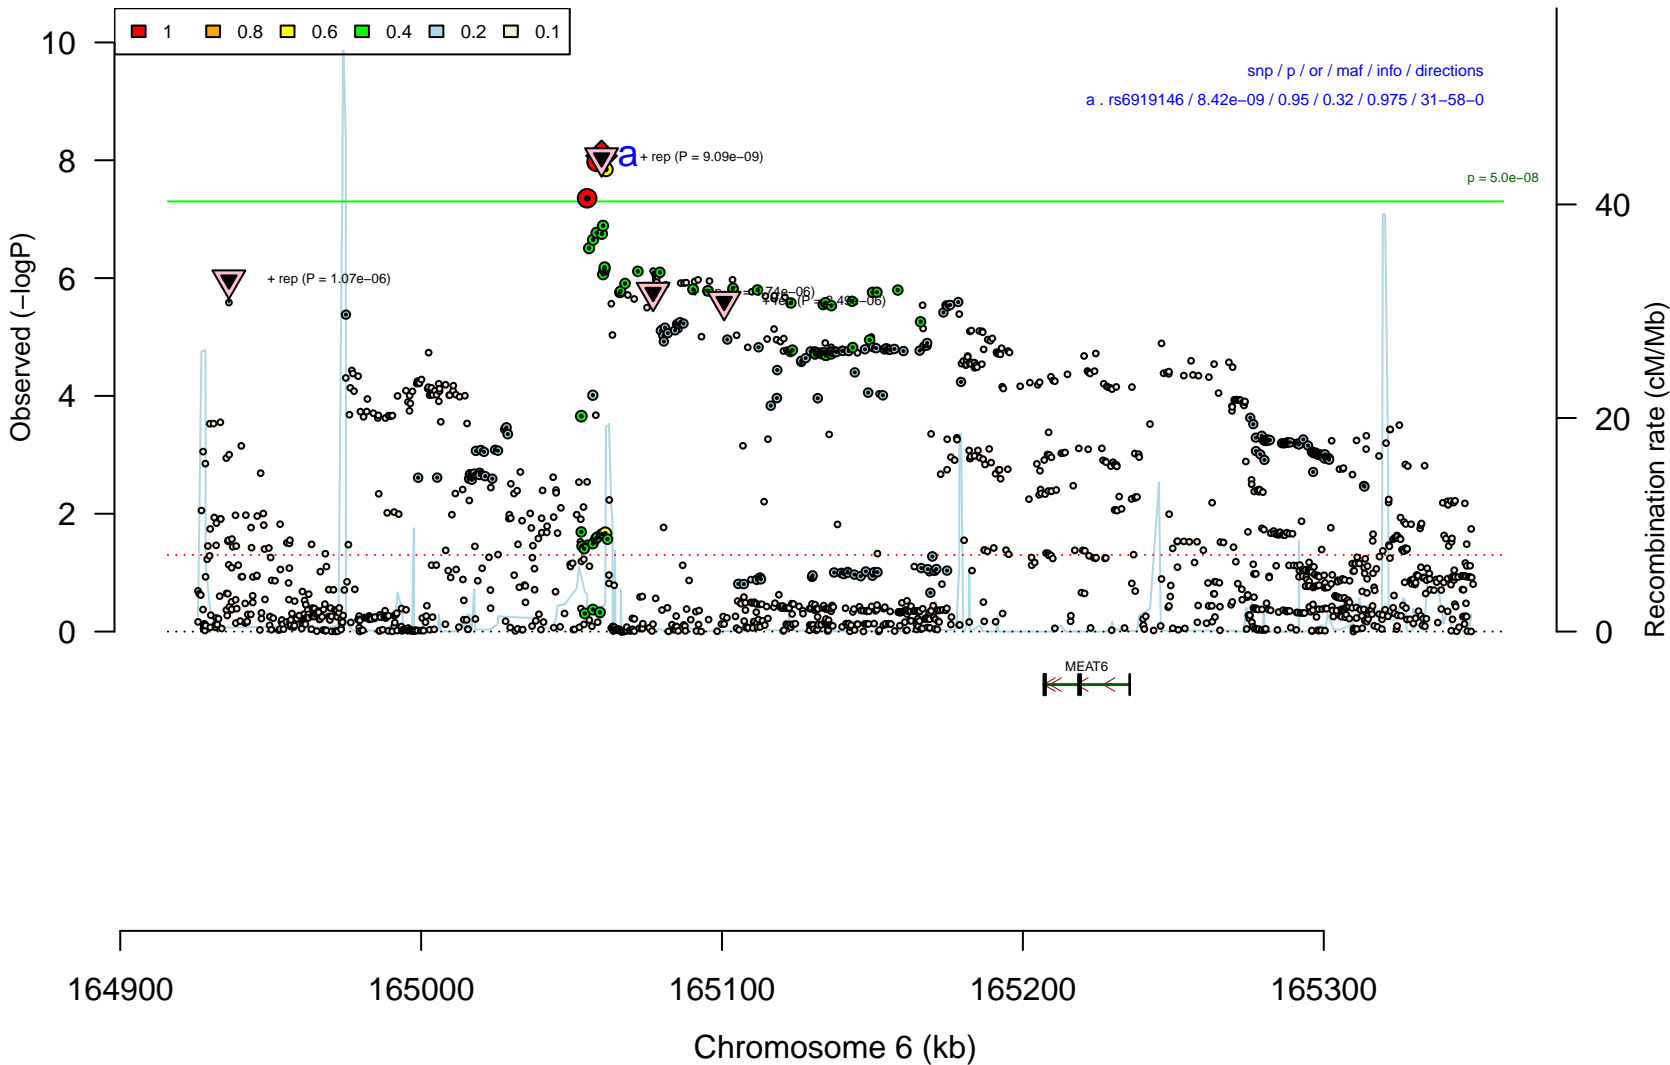

# PGC\_SCZ\_w3\_90\_0418b.154.chr9

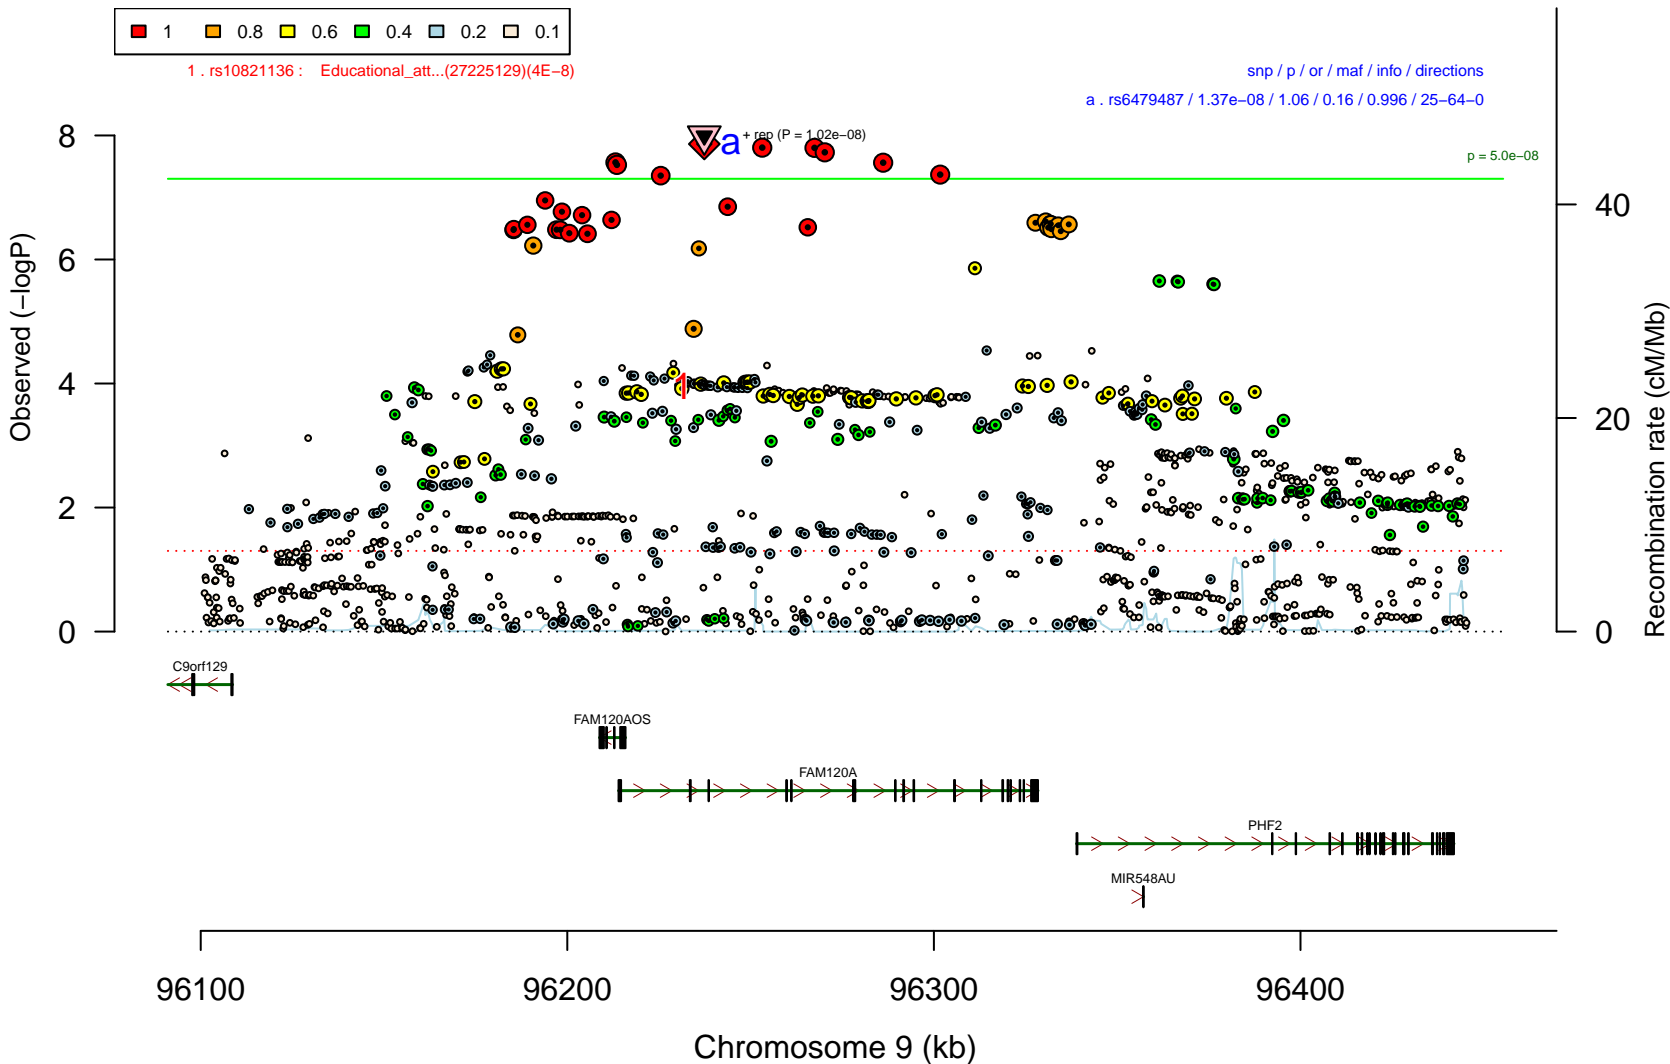

# PGC\_SCZ\_w3\_90\_0418b.227.chr16

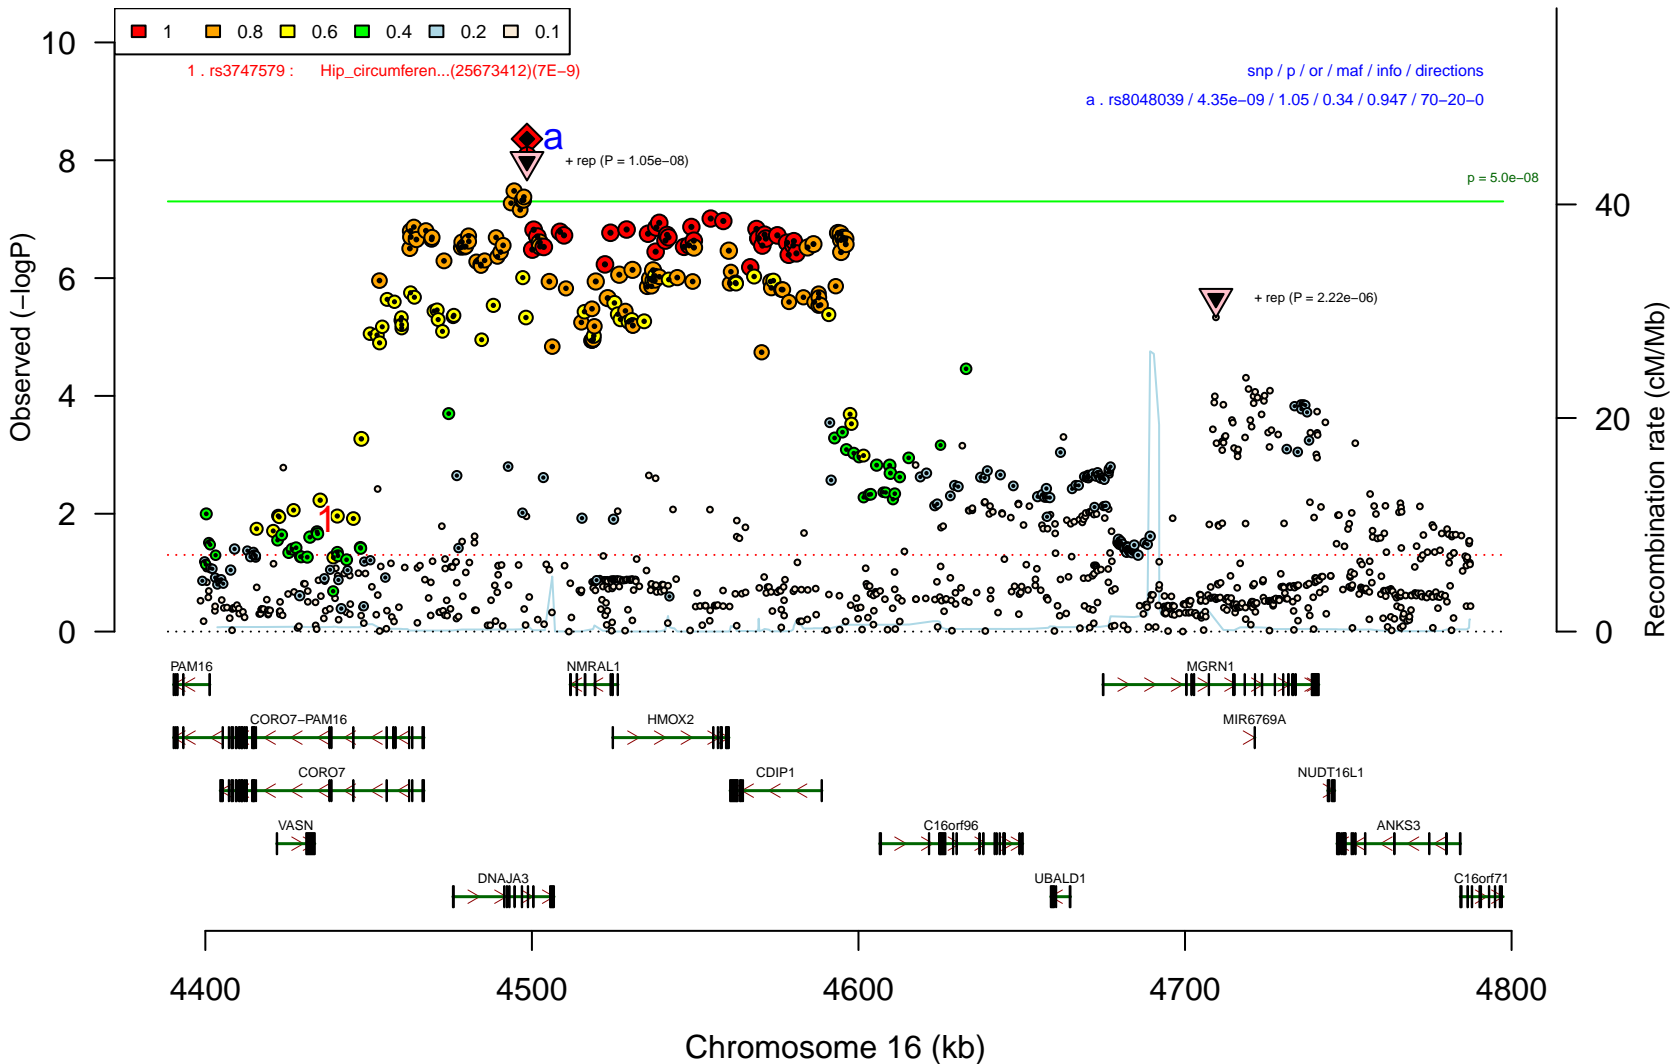

# PGC\_SCZ\_w3\_90\_0418b.177.chr11

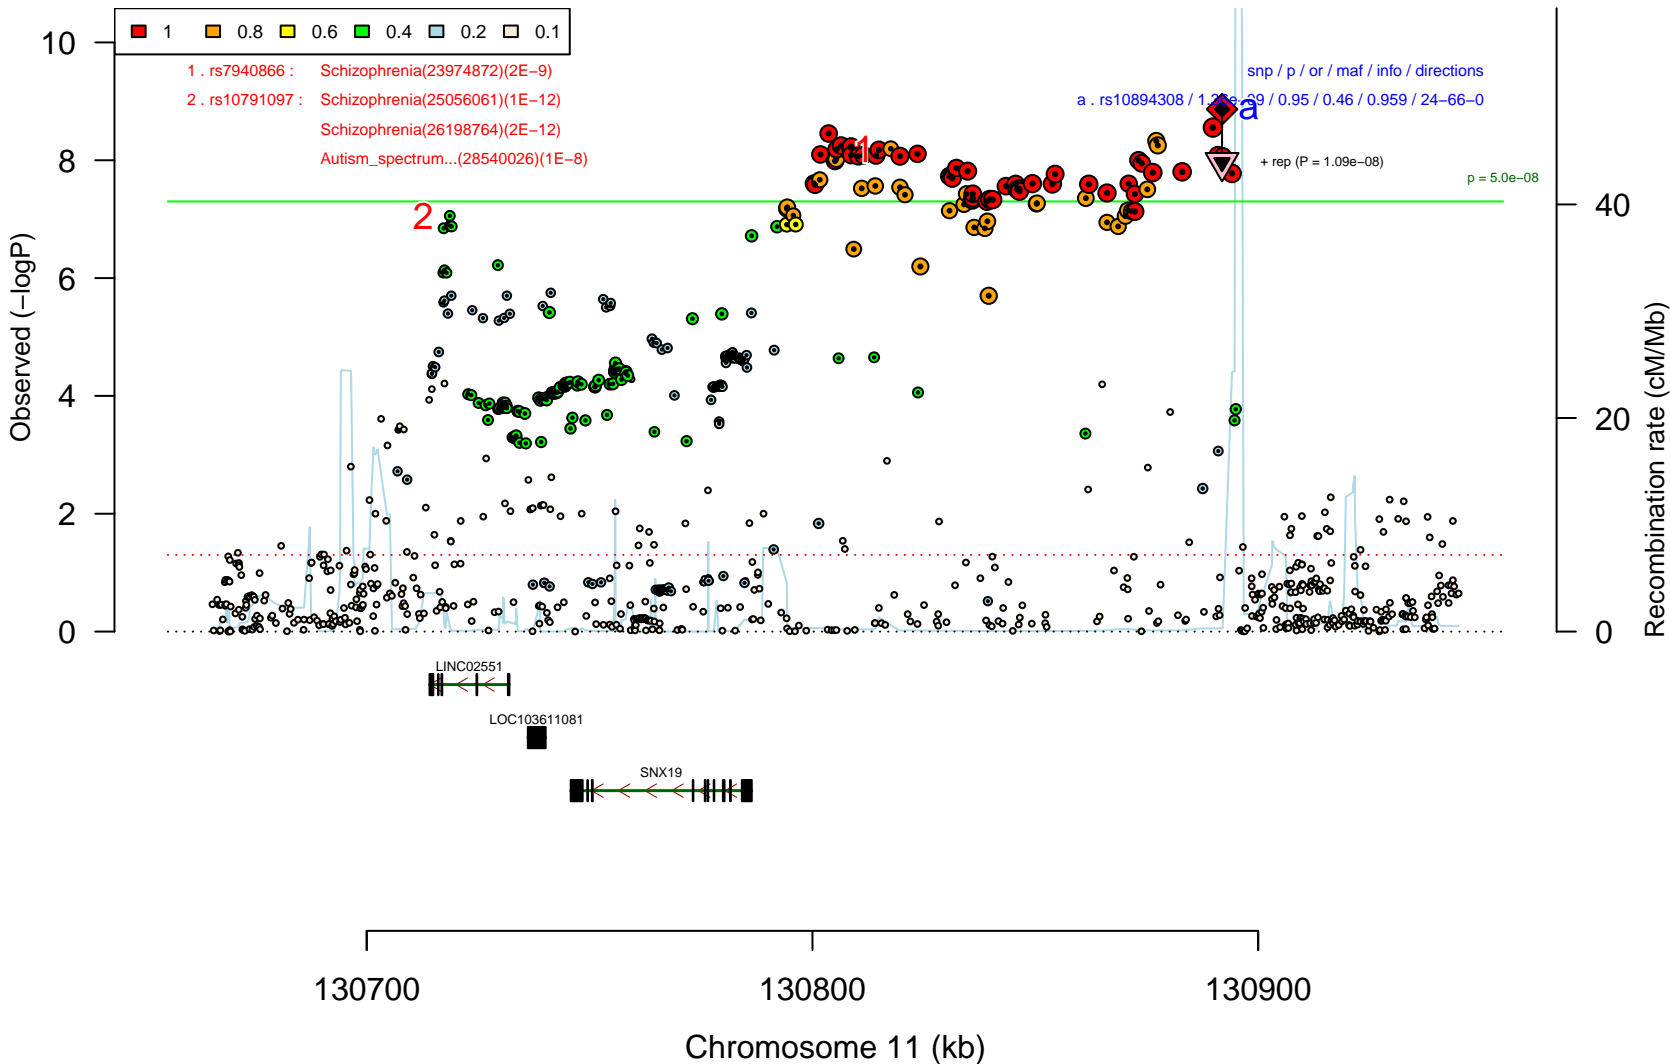

# PGC\_SCZ\_w3\_90\_0418b.43.chr2

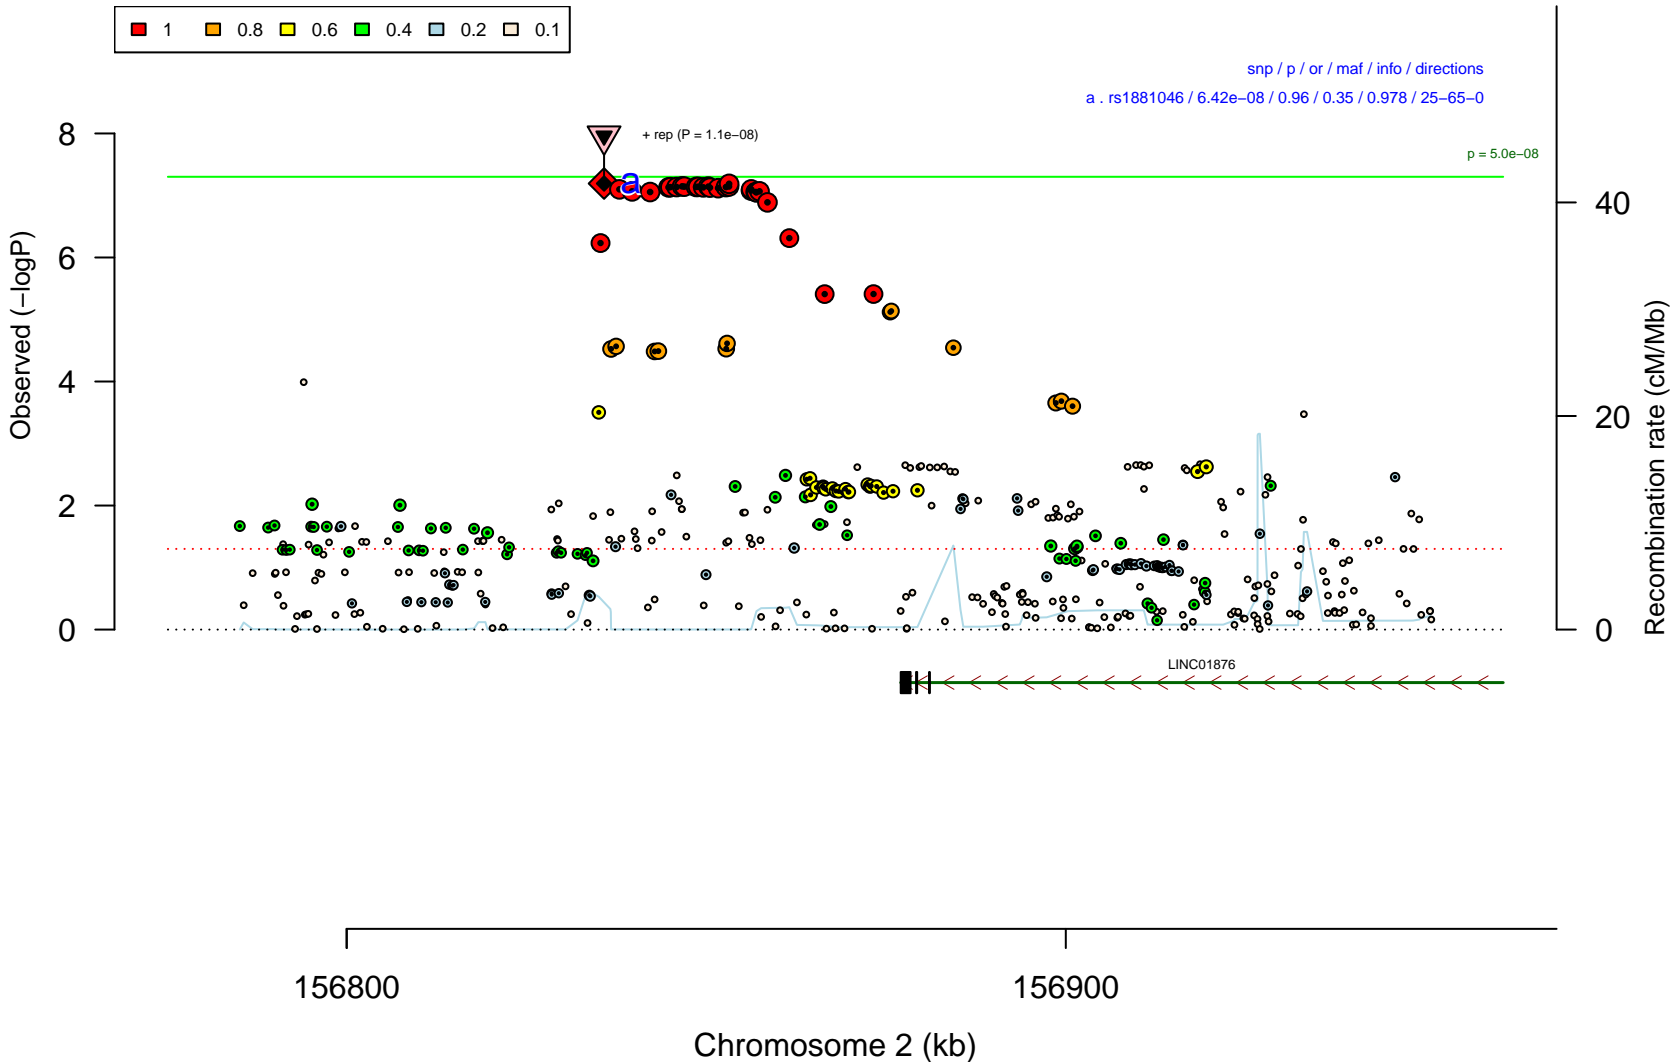

# PGC\_SCZ\_w3\_90\_0418b.165.chr10

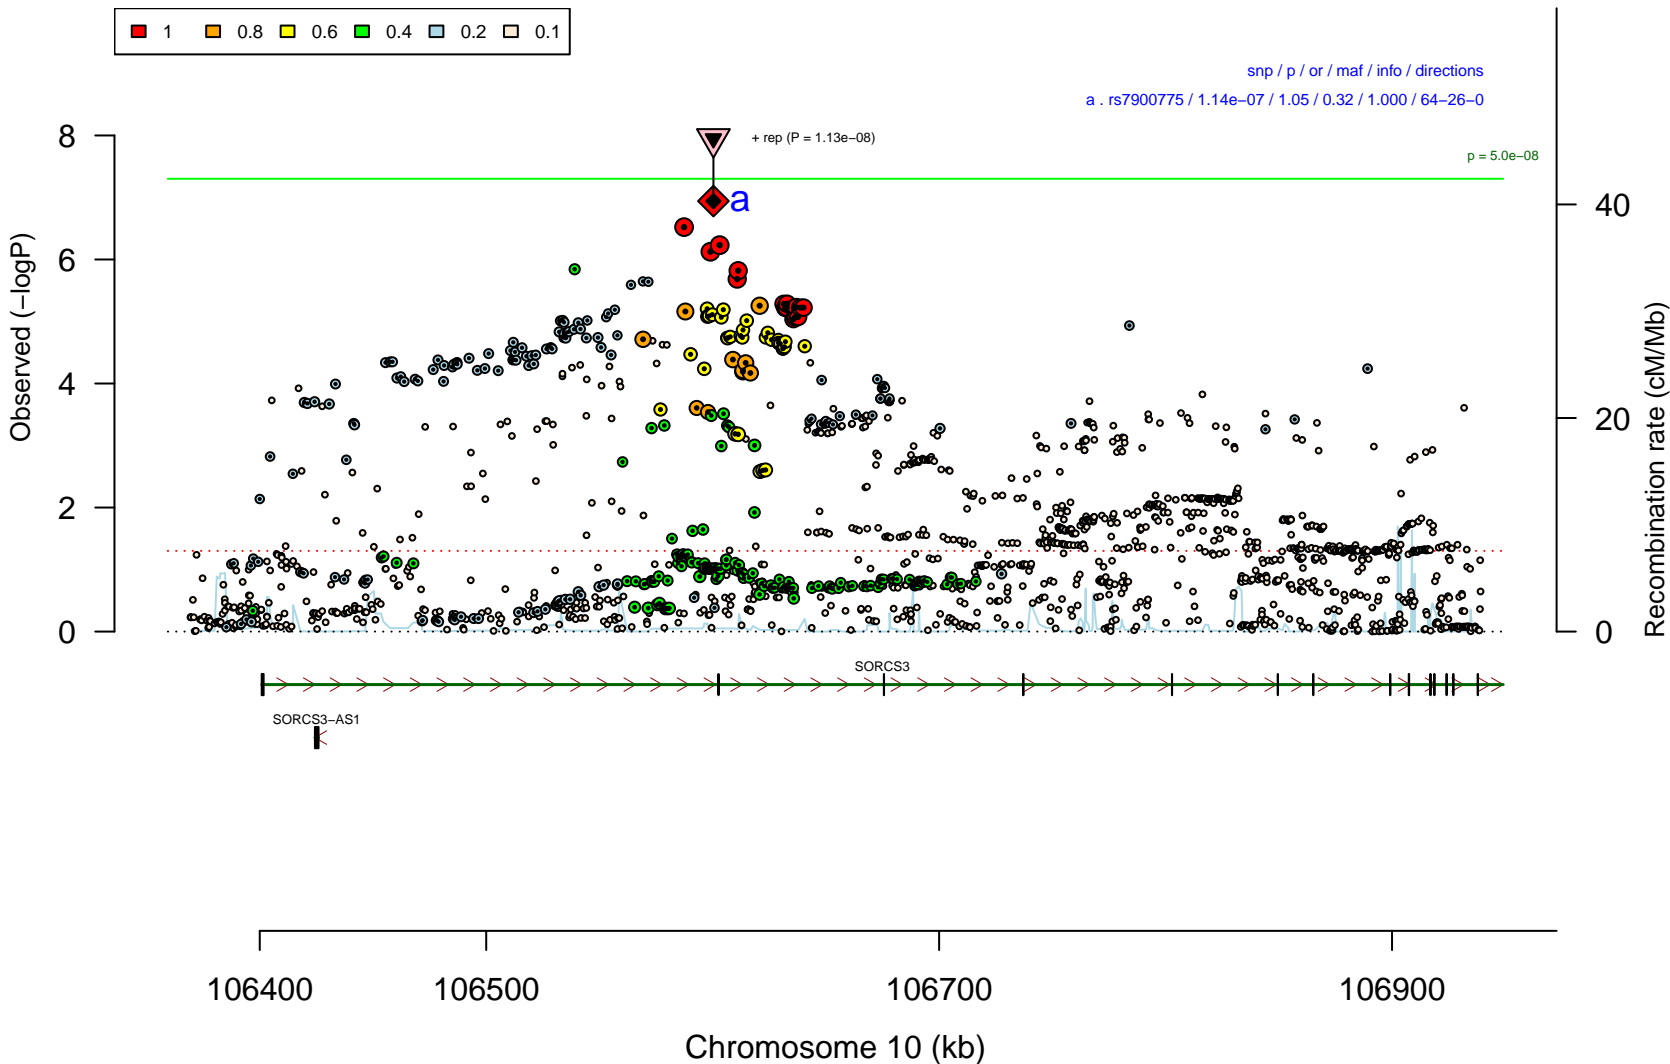



# PGC\_SCZ\_w3\_90\_0418b.161.chr10

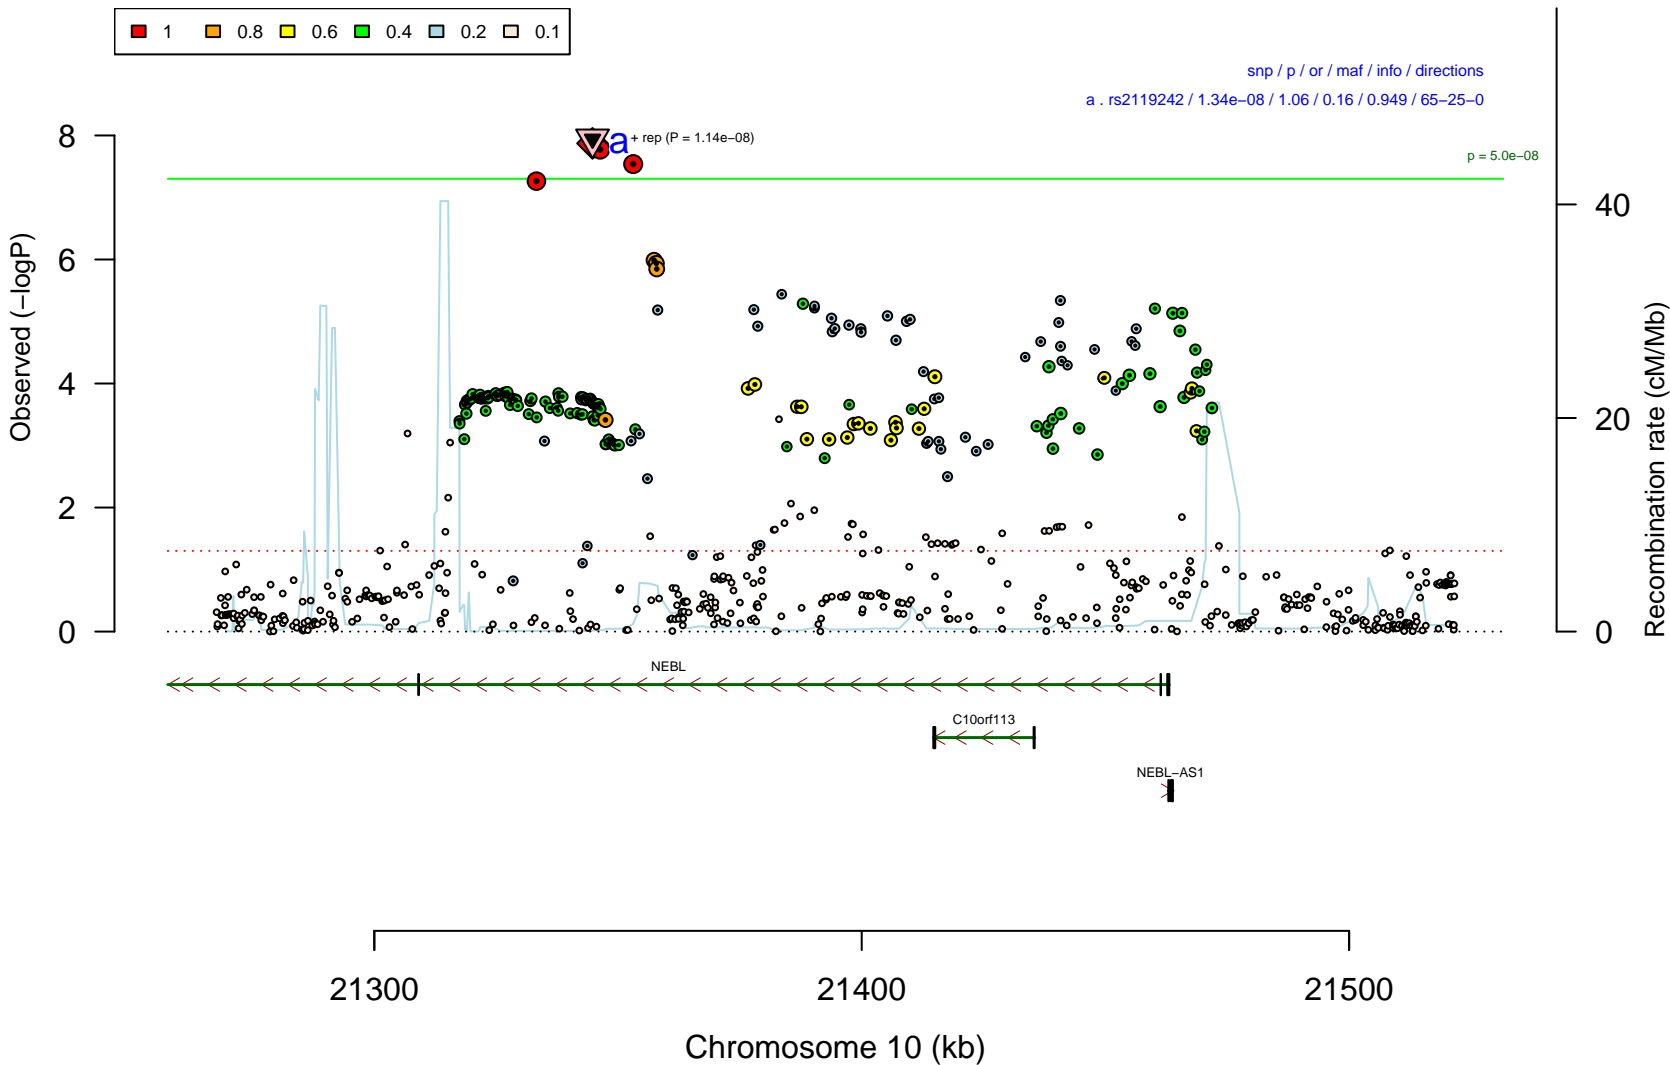

PGC SCZ w3 90 0418b.29.chr2

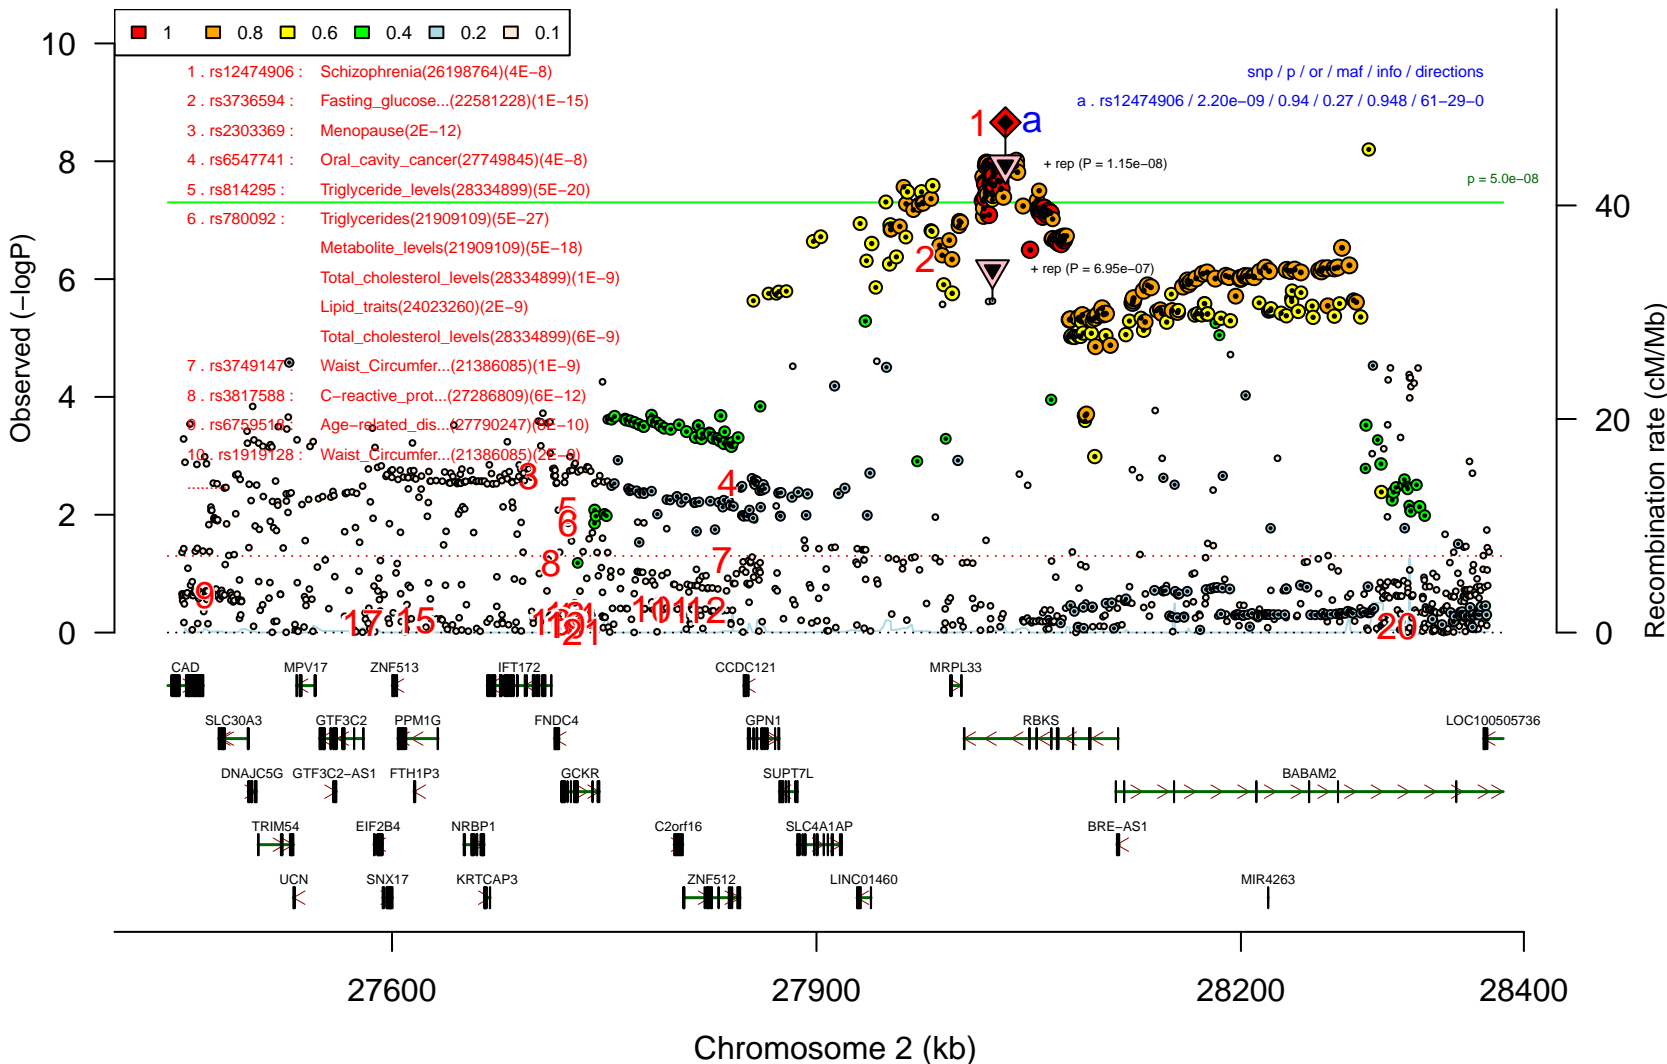

# PGC\_SCZ\_w3\_90\_0418b.101.chr6

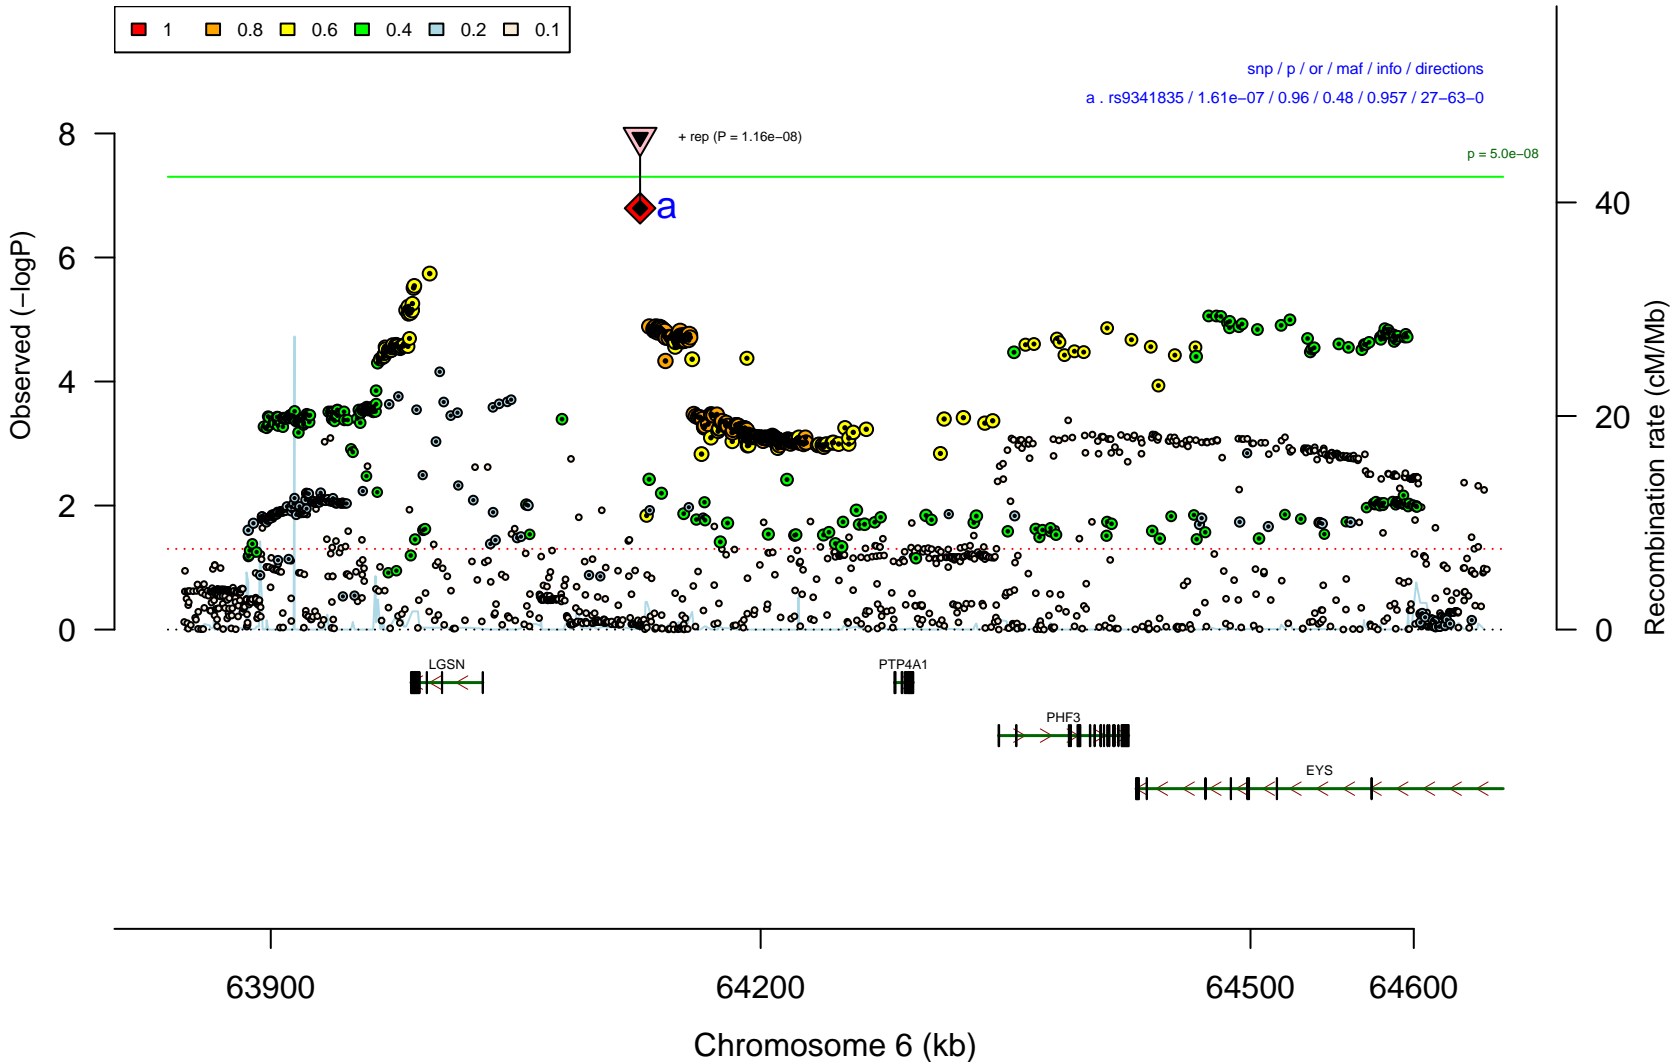

# PGC\_SCZ\_w3\_90\_0418b.153.chr9

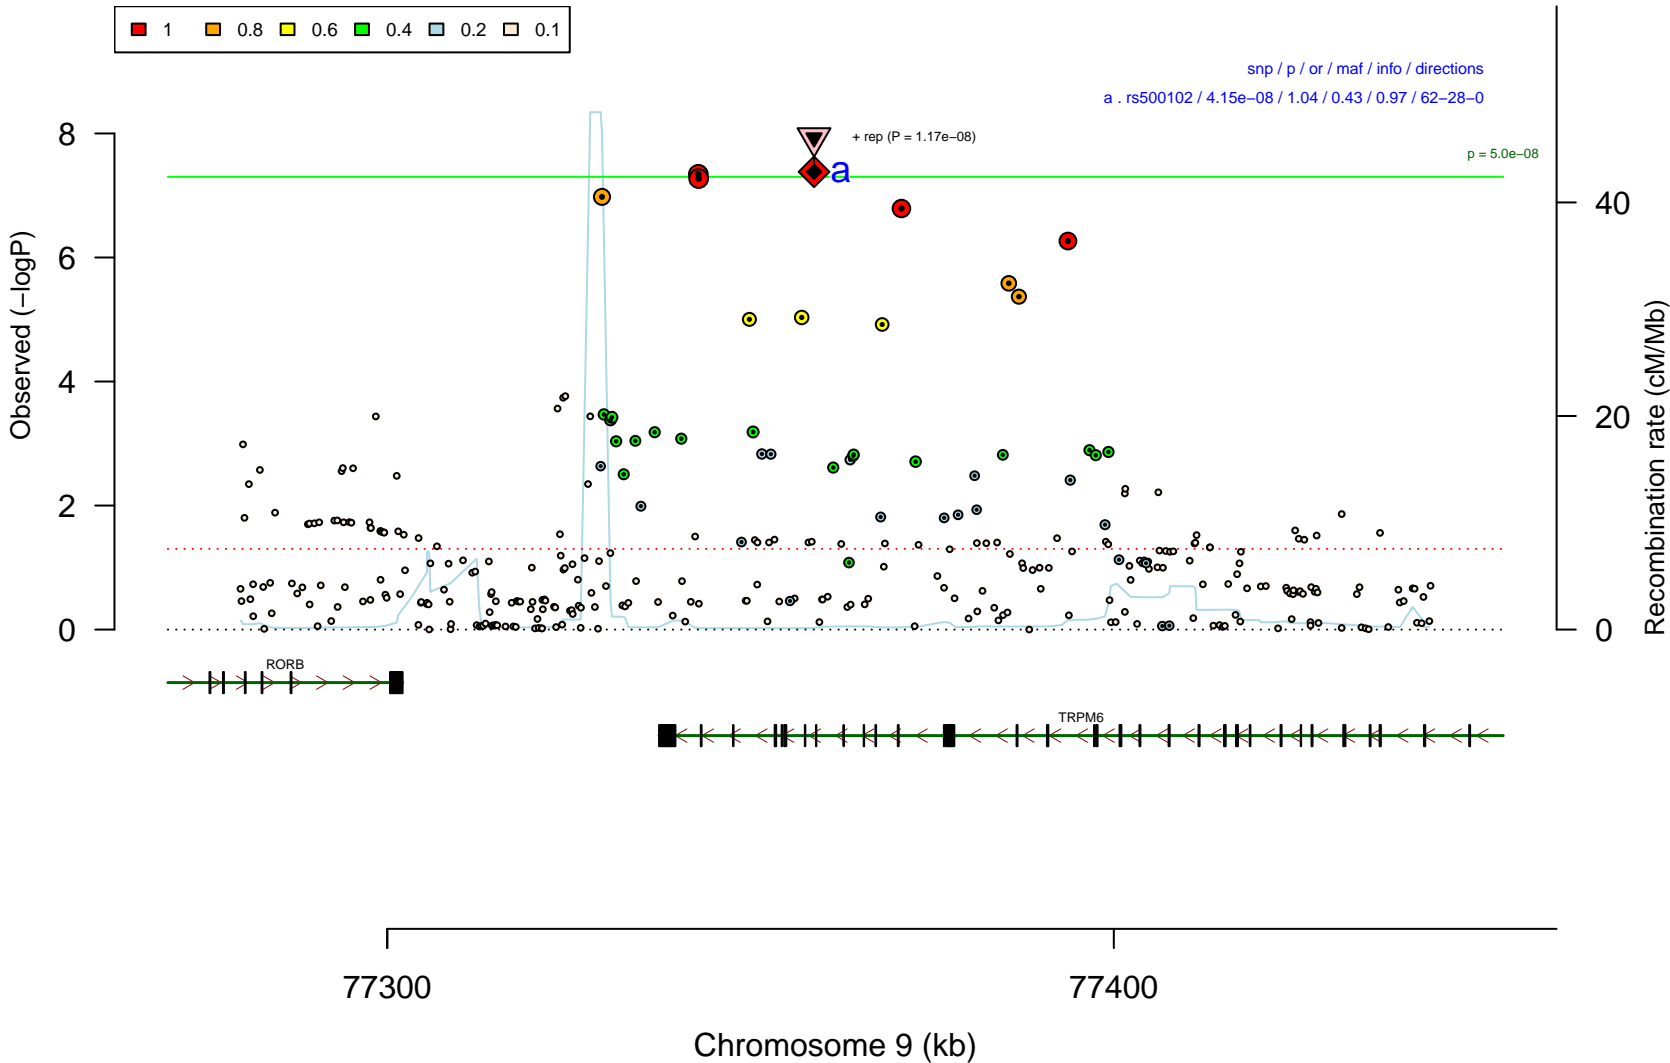

# PGC\_SCZ\_w3\_90\_0418b.18.chr1

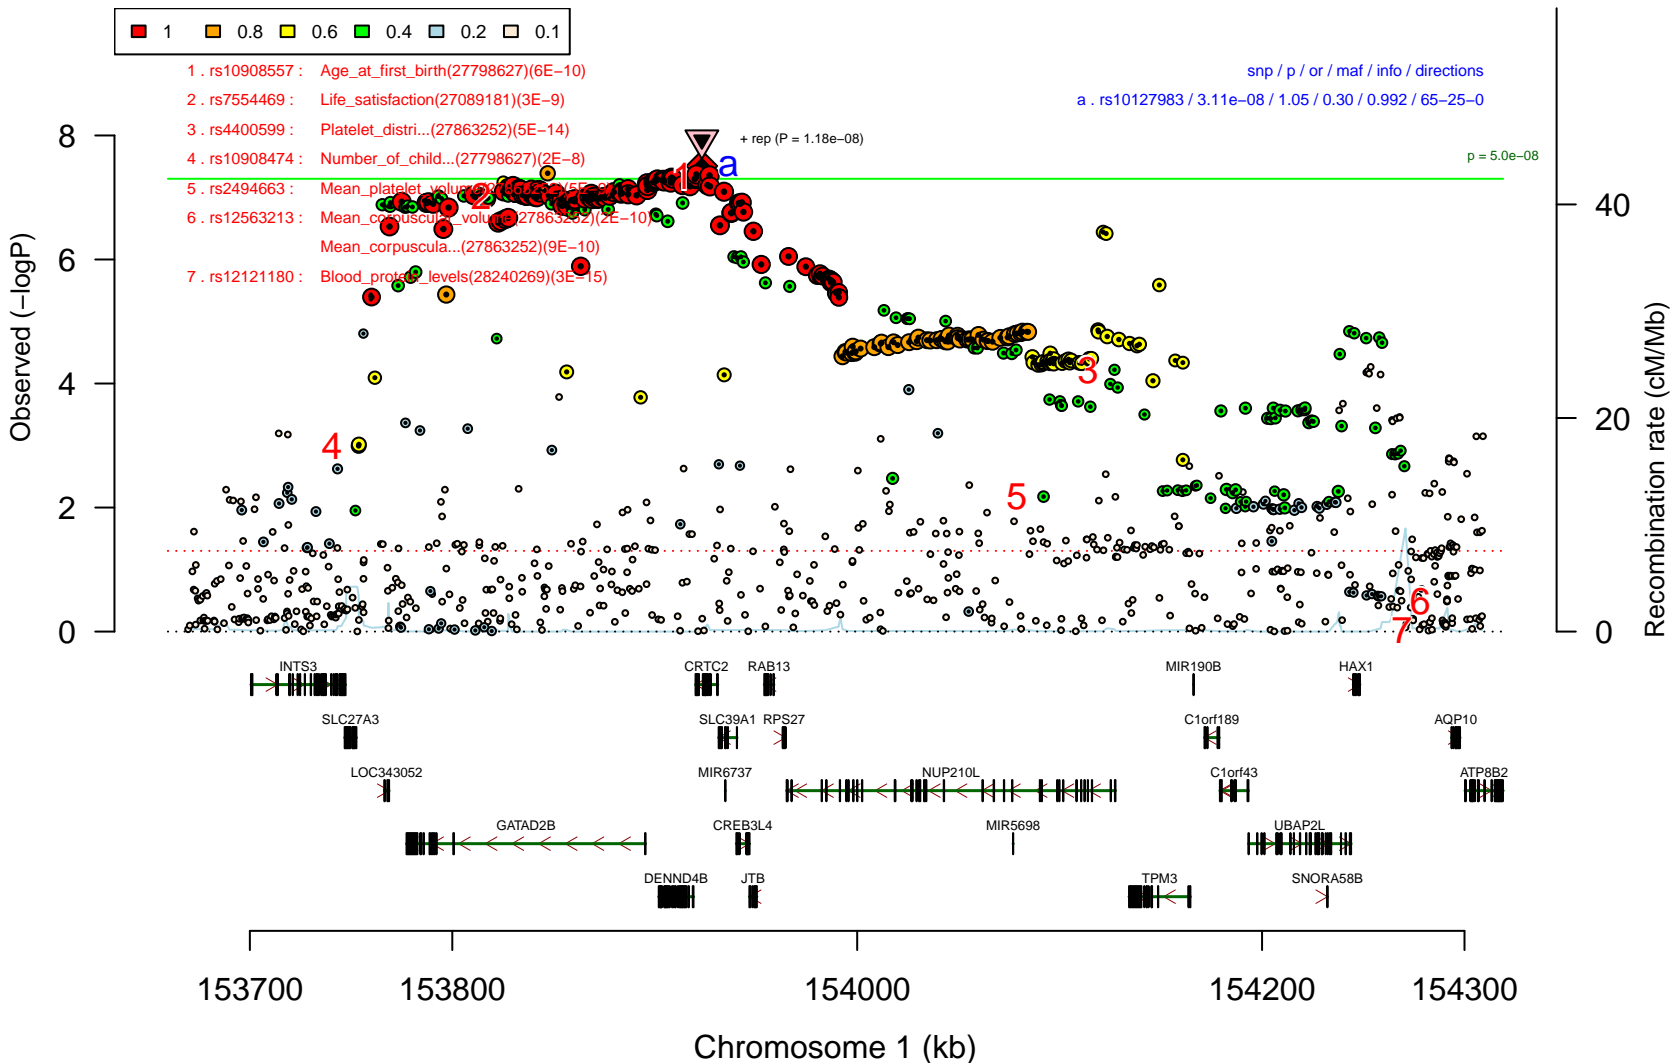

# PGC\_SCZ\_w3\_90\_0418b.149.chr9

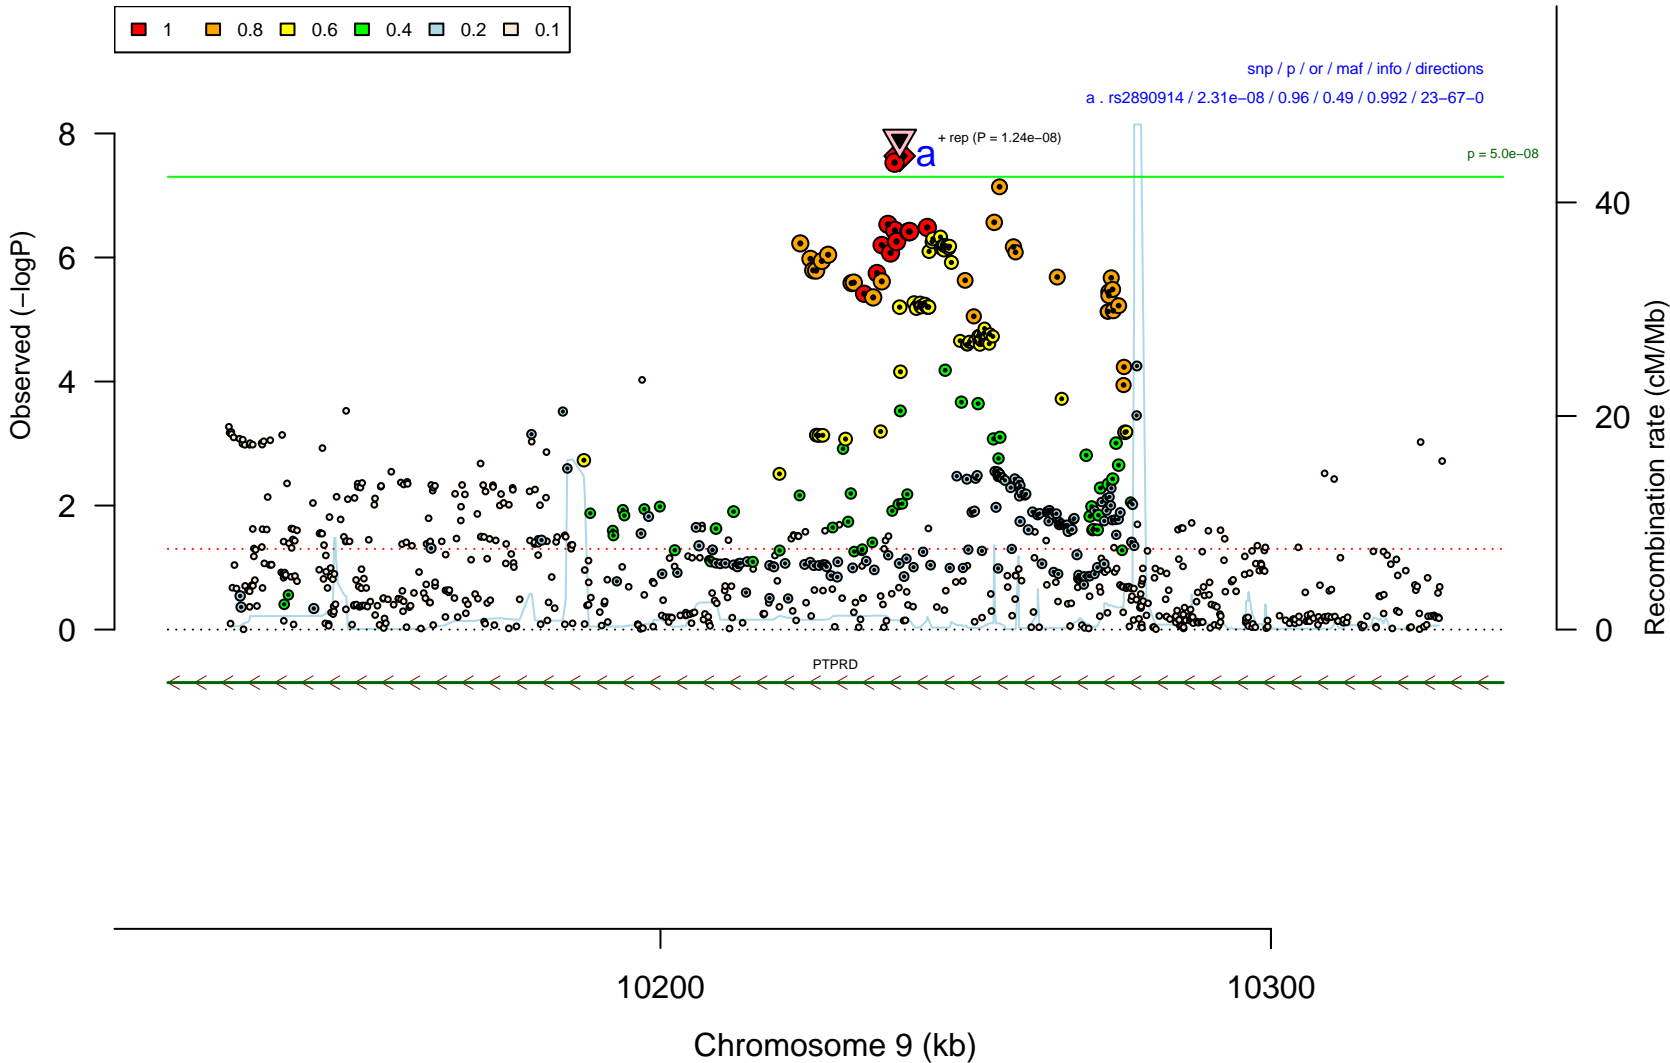

# PGC\_SCZ\_w3\_90\_0418b.113.chr6

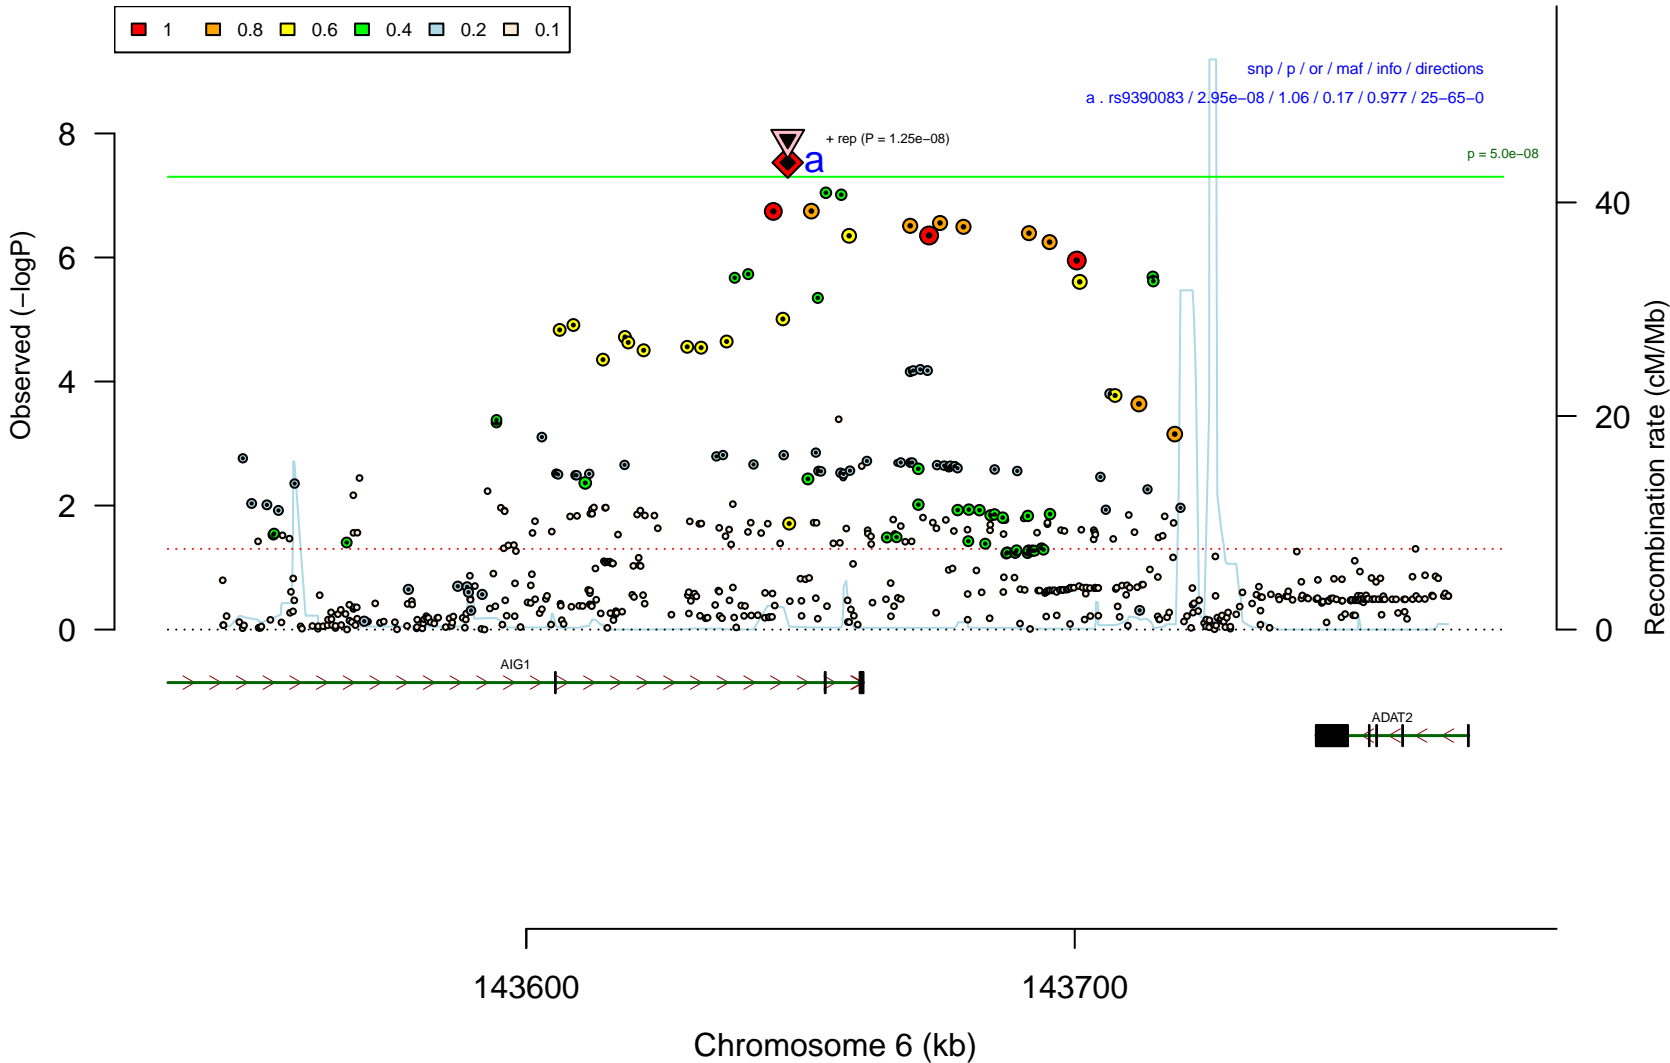

# PGC\_SCZ\_w3\_90\_0418b.32.chr2

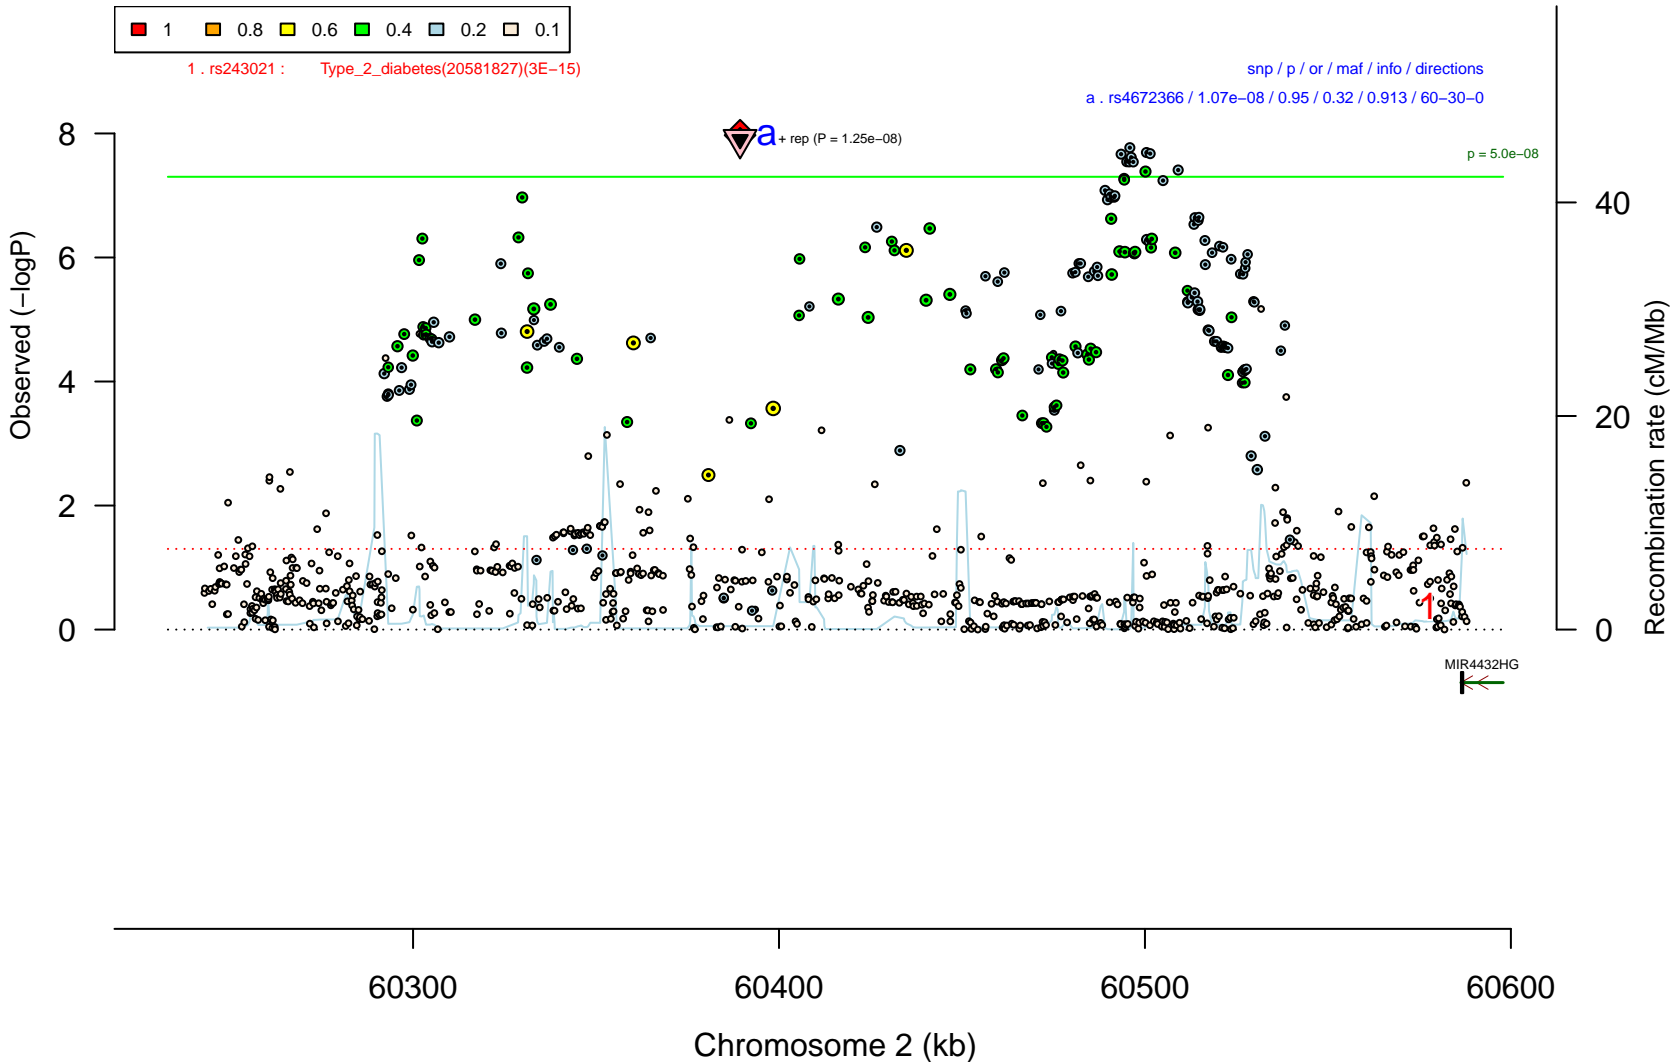



# PGC\_SCZ\_w3\_90\_0418b.47.chr2

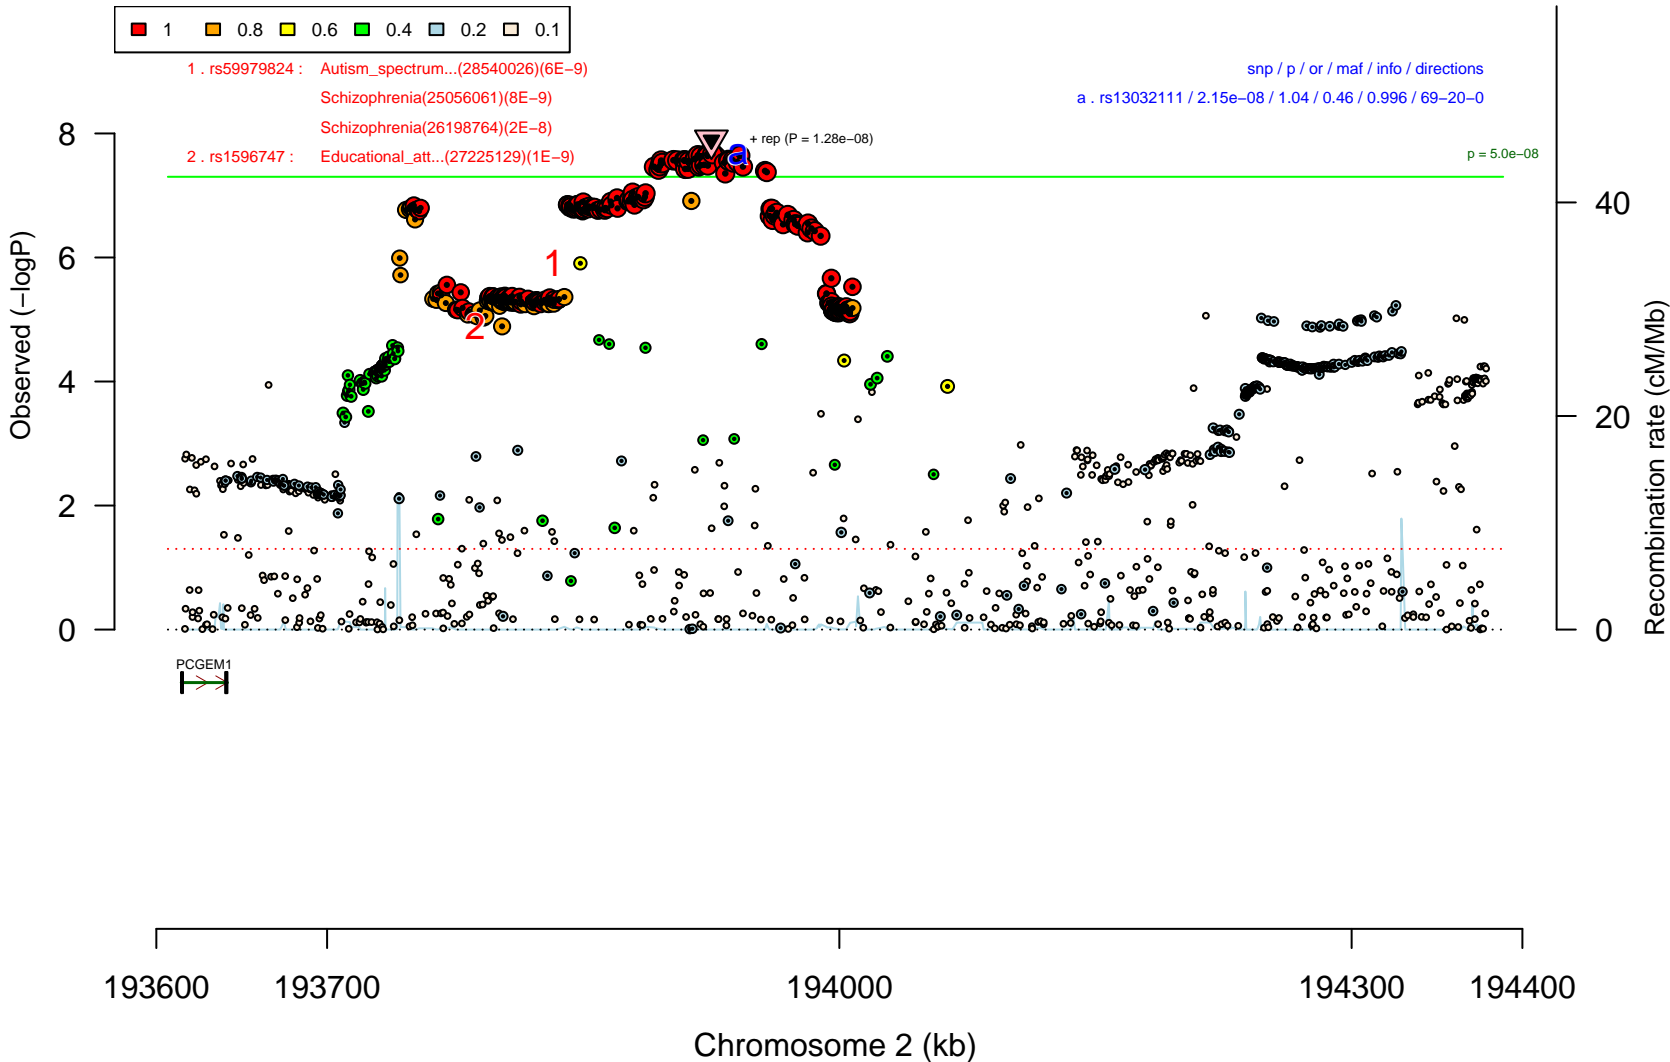

# PGC\_SCZ\_w3\_90\_0418b.265.chr22

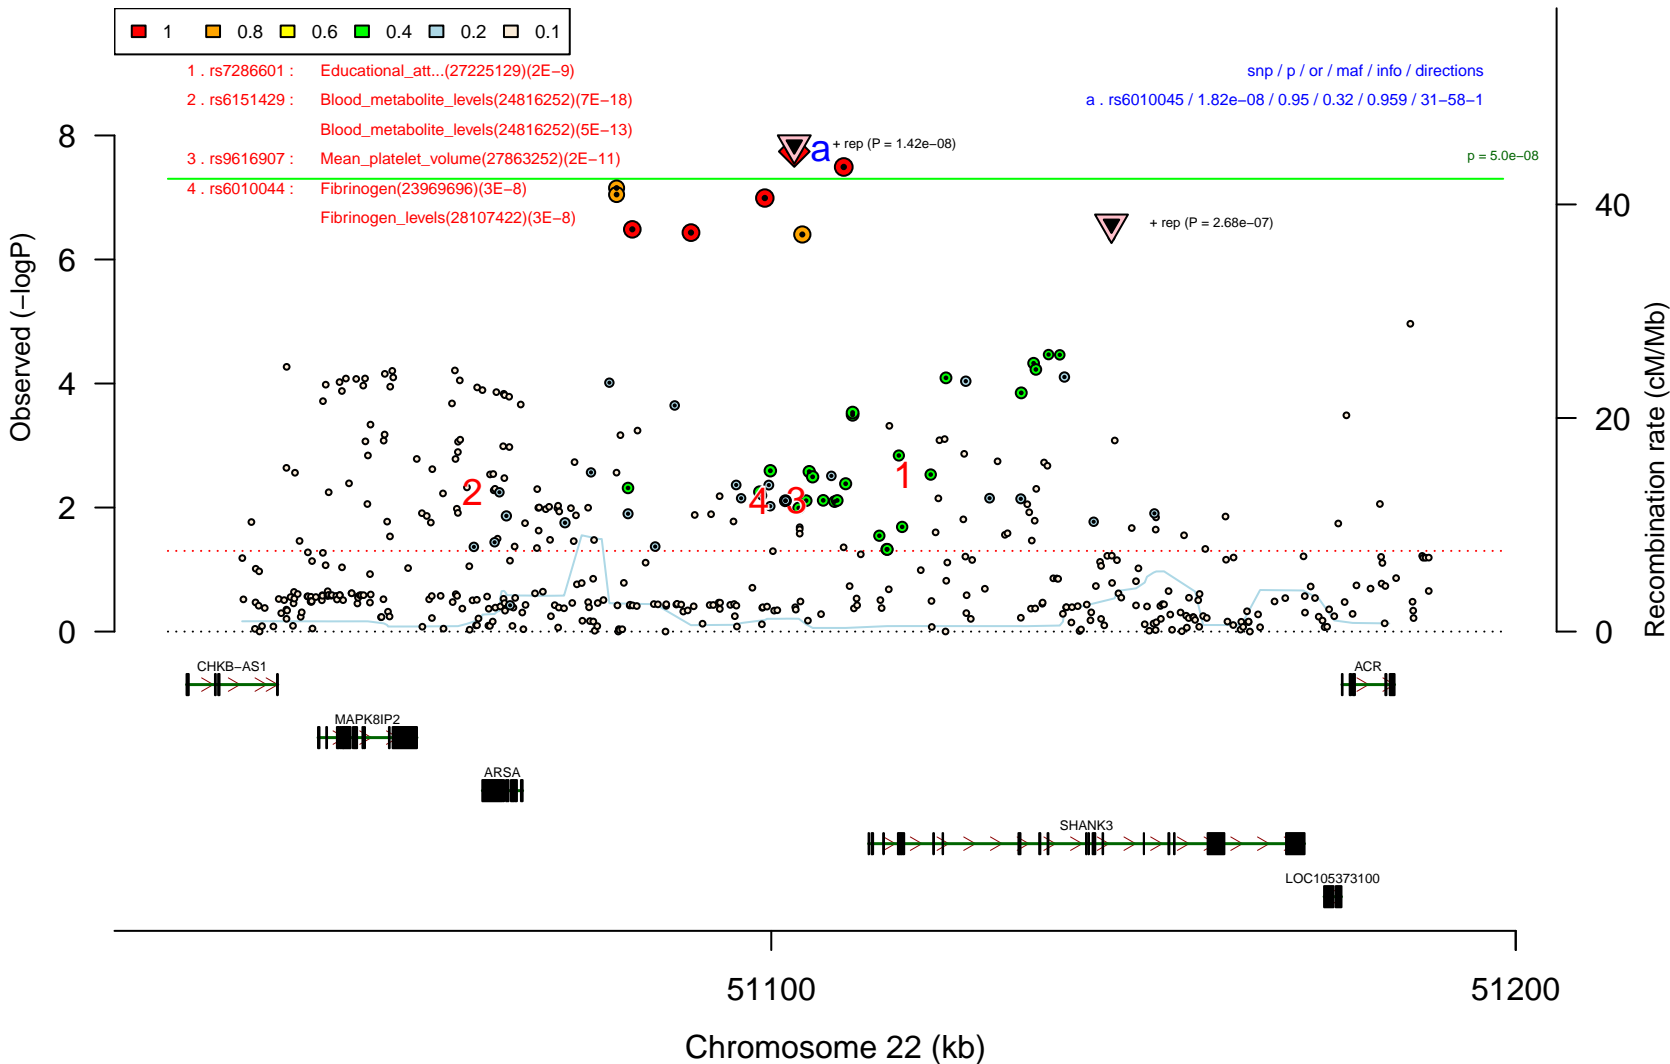

# PGC\_SCZ\_w3\_90\_0418b.248.chr18

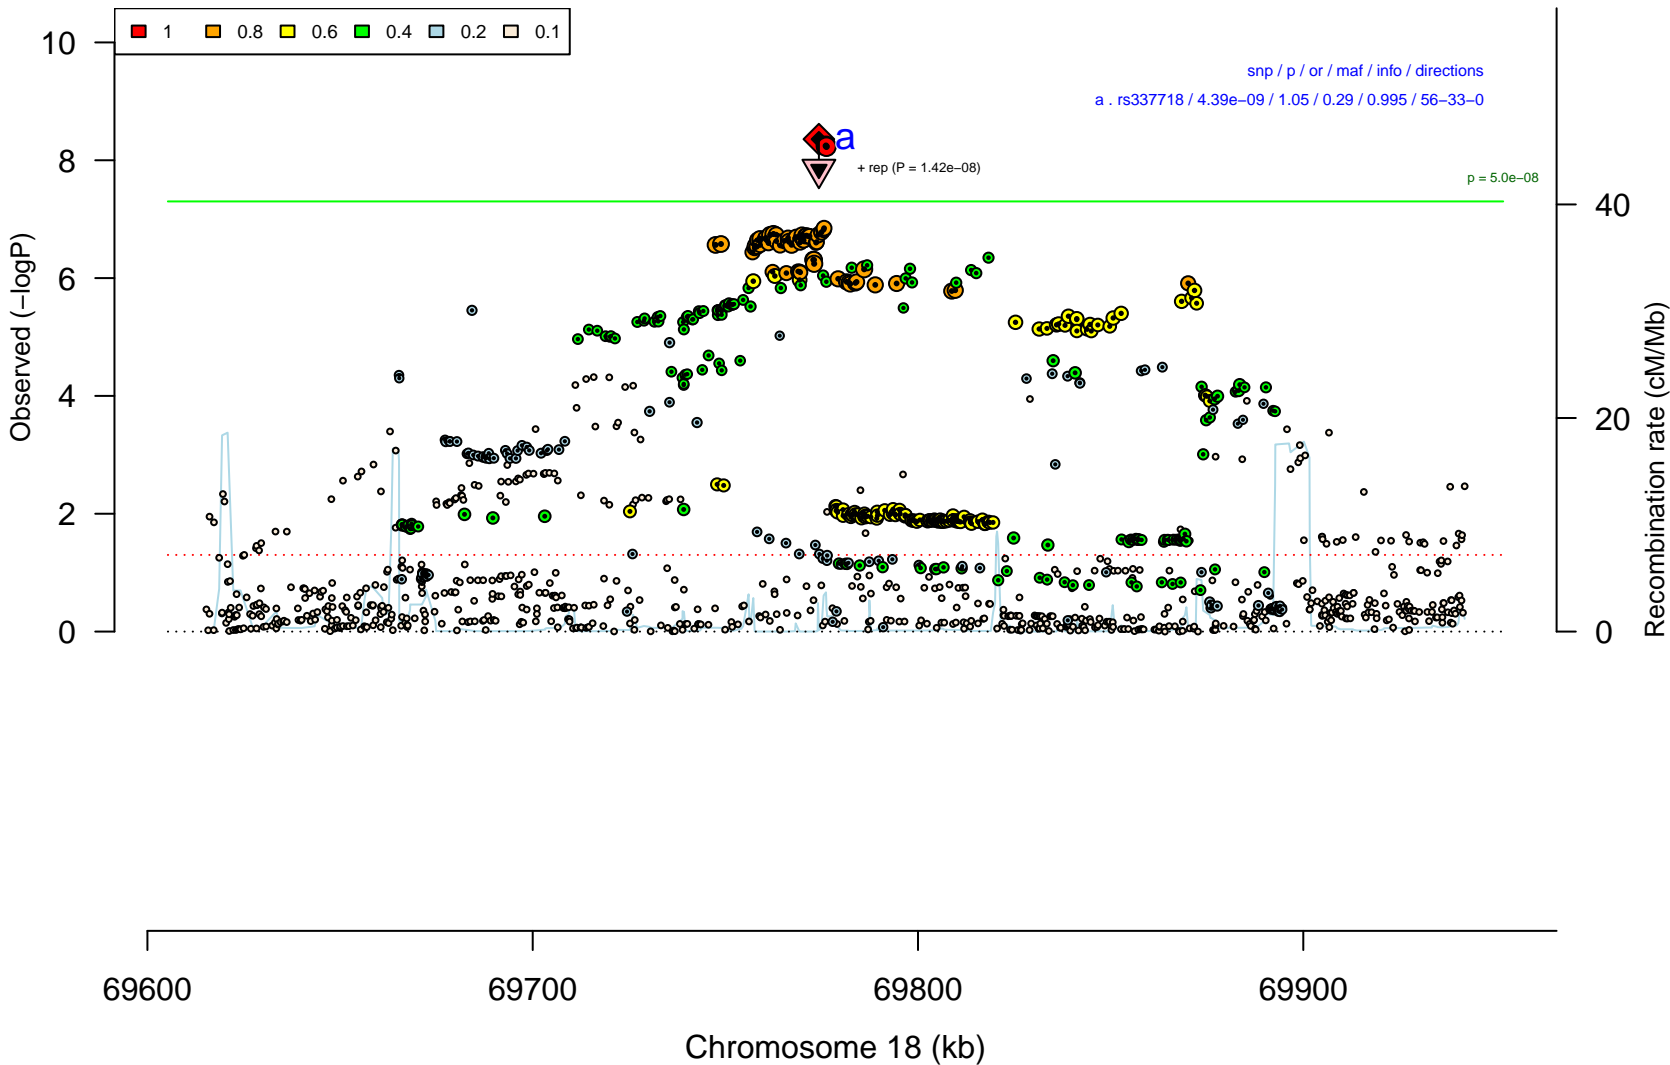

# PGC\_SCZ\_w3\_90\_0418b.257.chr19

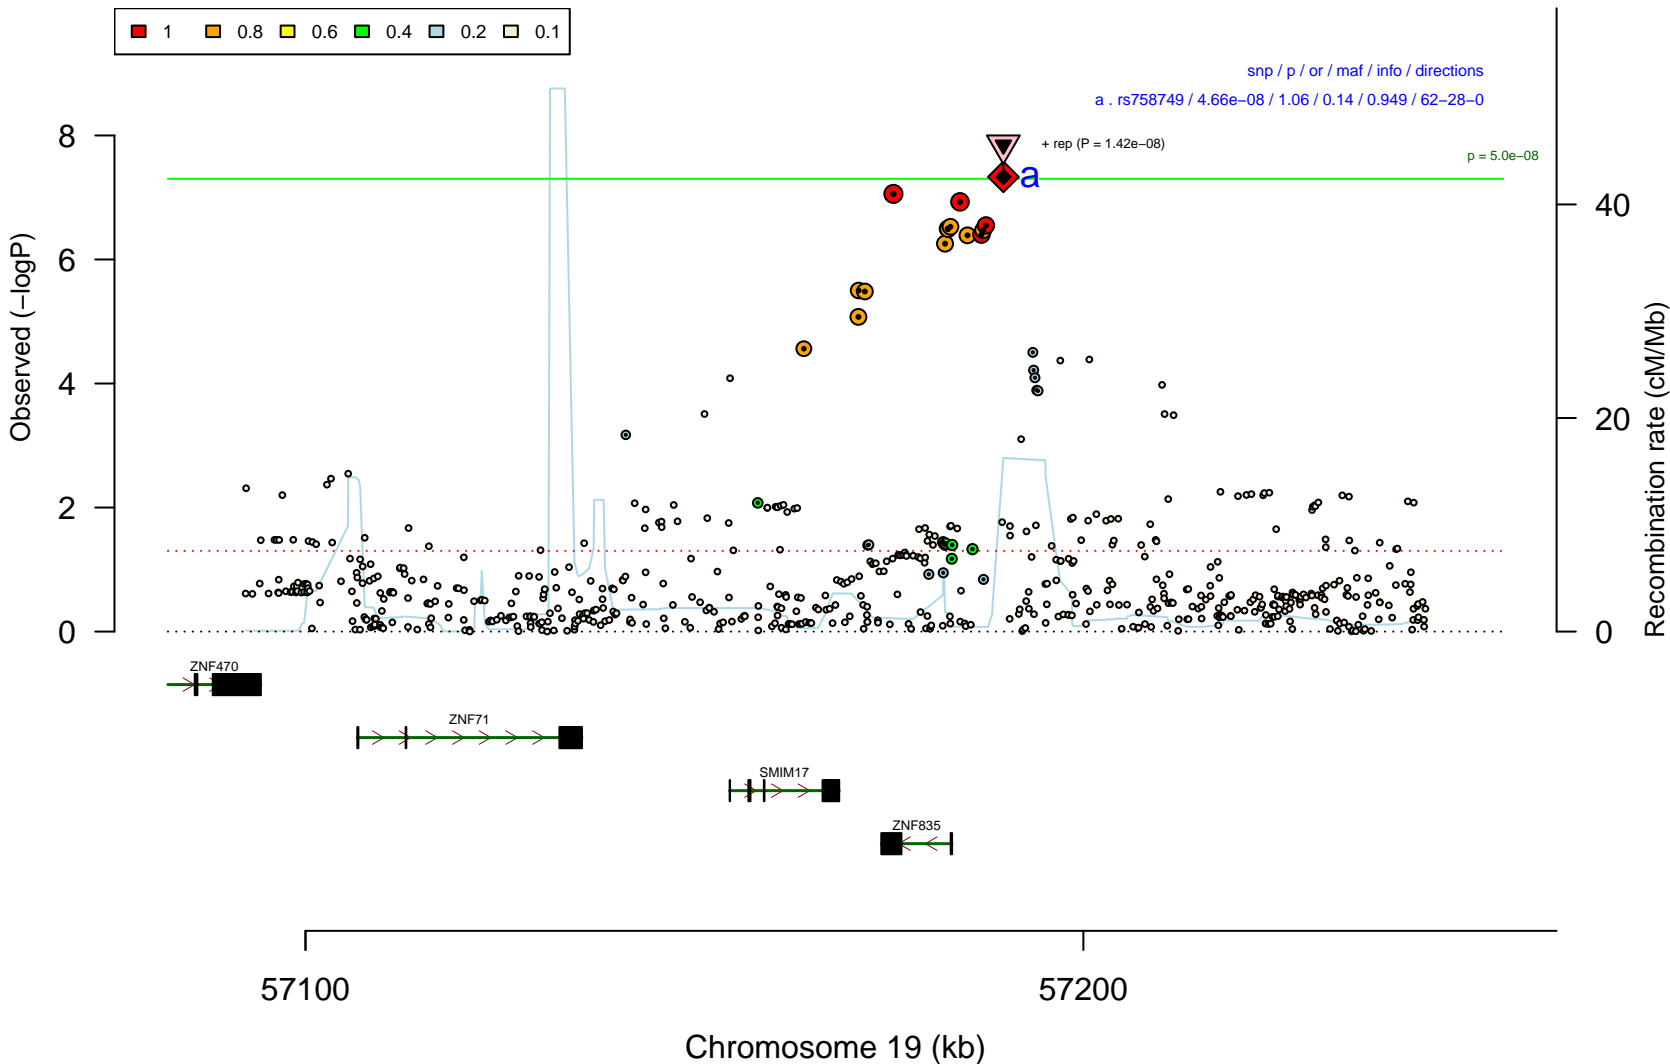

PGC SCZ w3 90 0418b.250.chr19

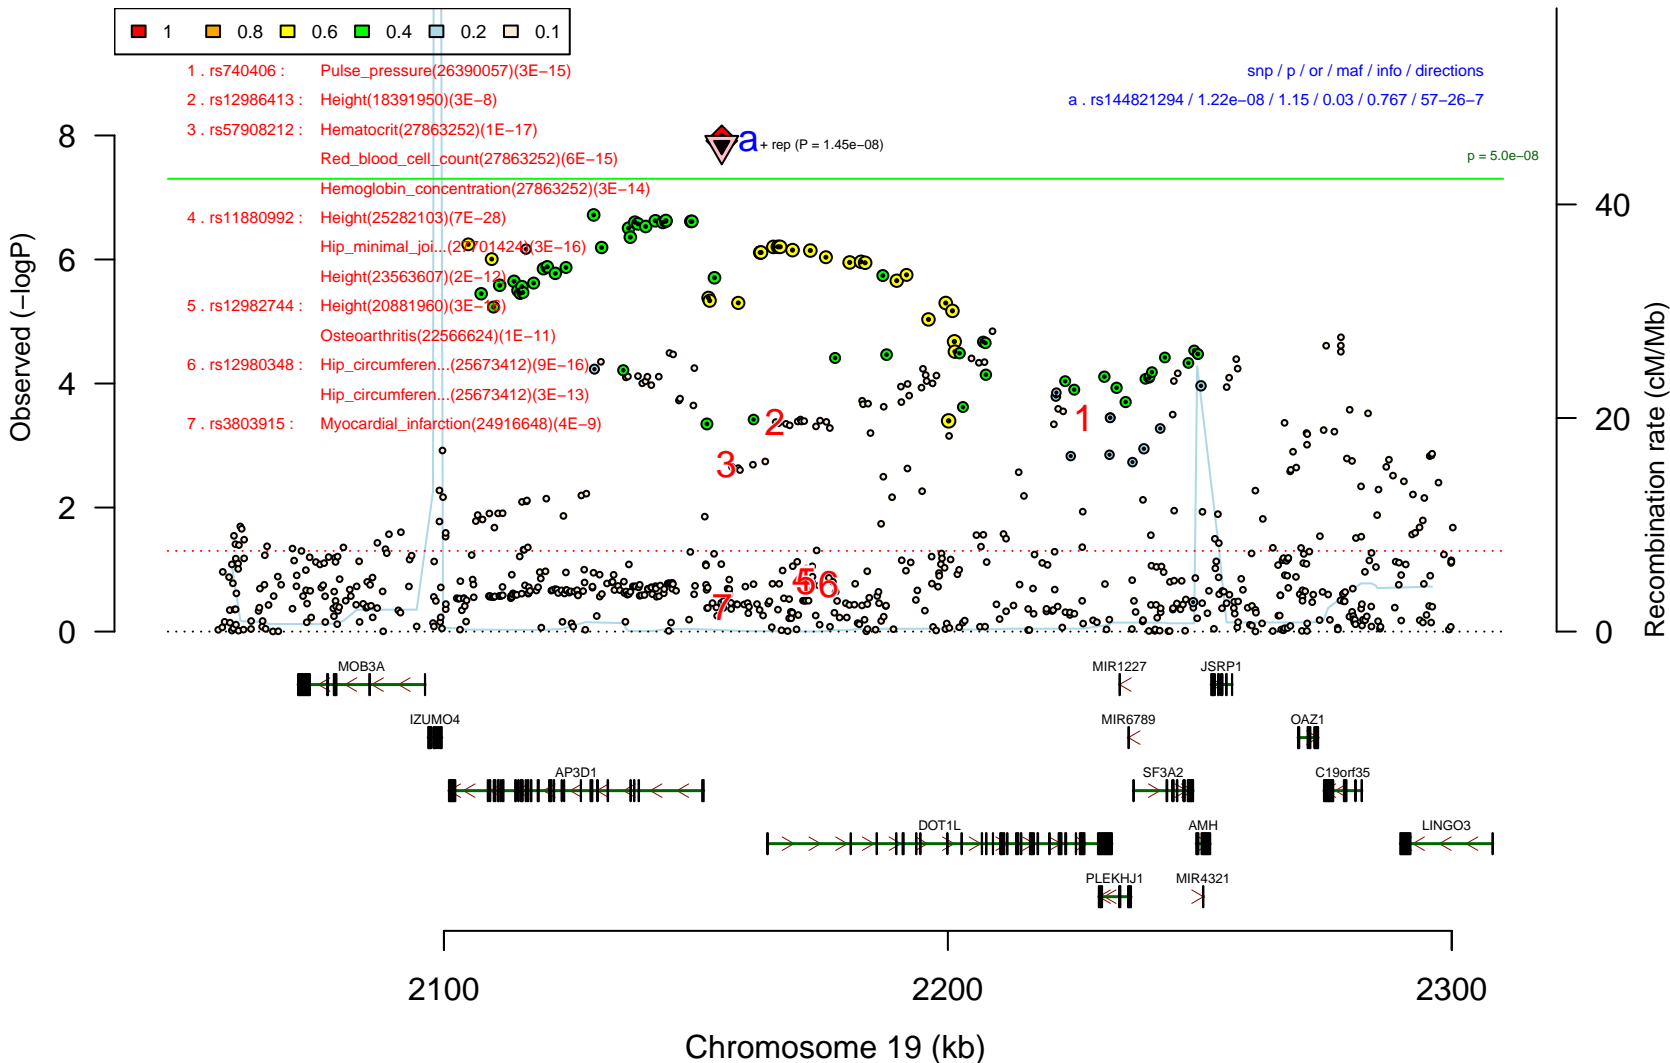

# PGC\_SCZ\_w3\_90\_0418b.34.chr2

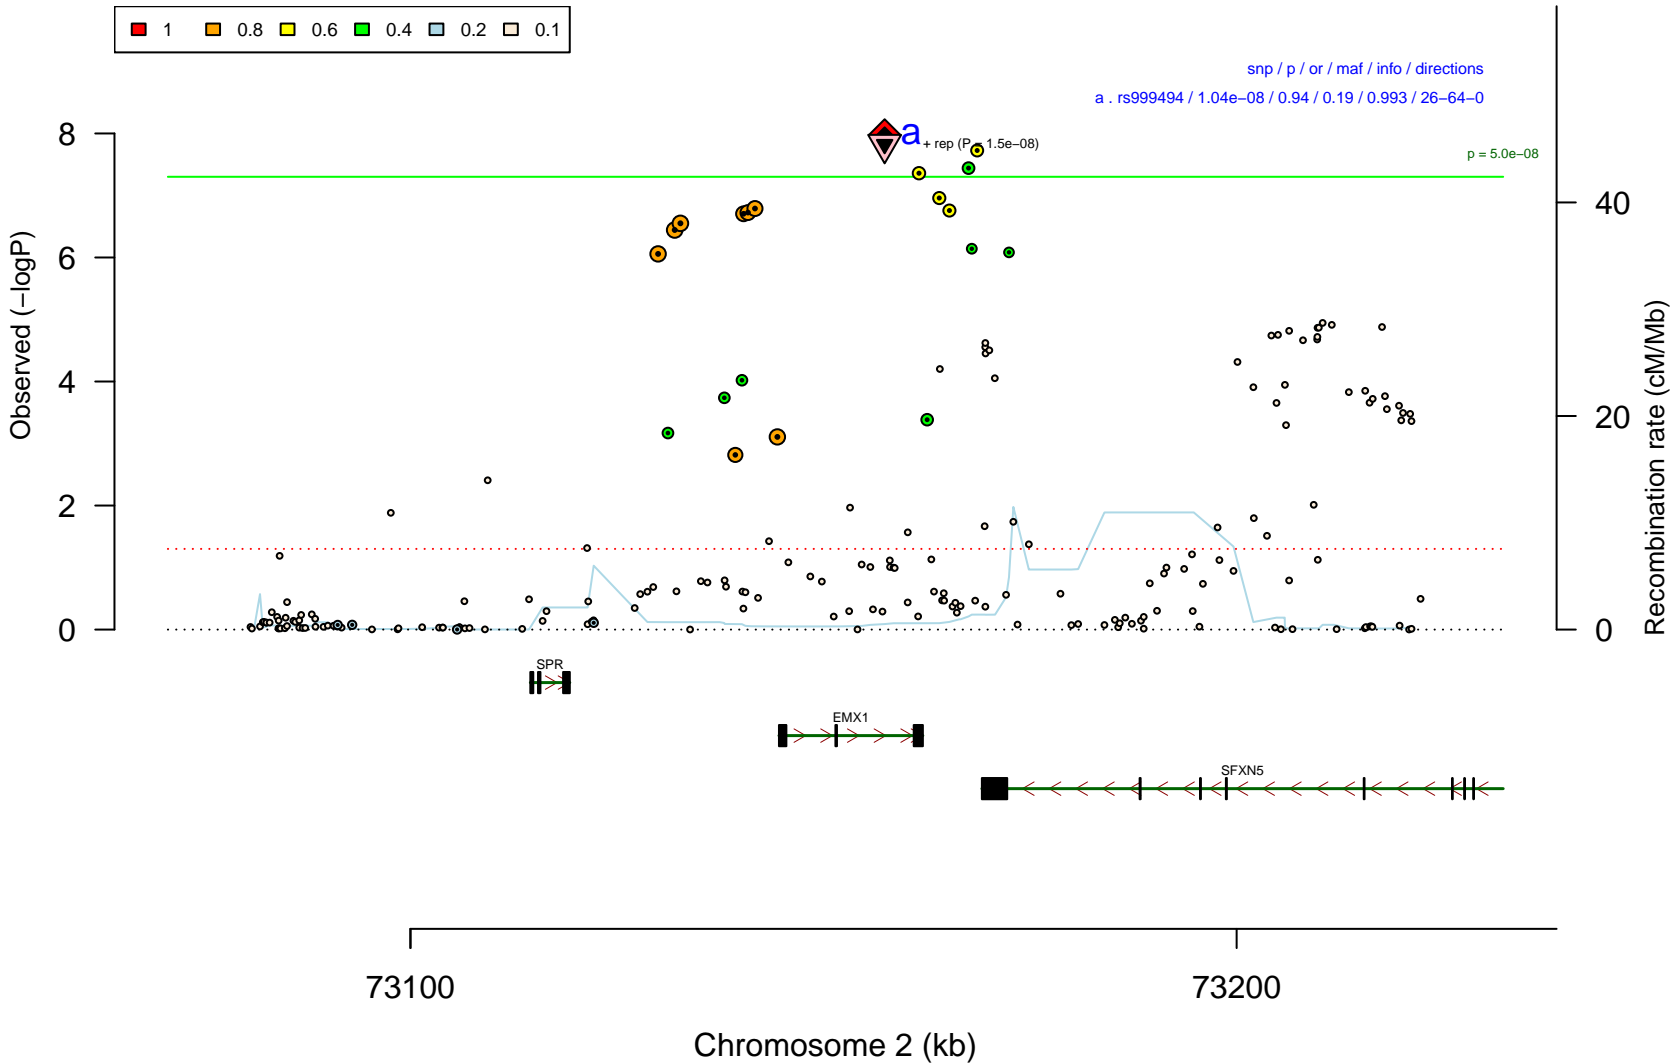

# PGC\_SCZ\_w3\_90\_0418b.98.chr5

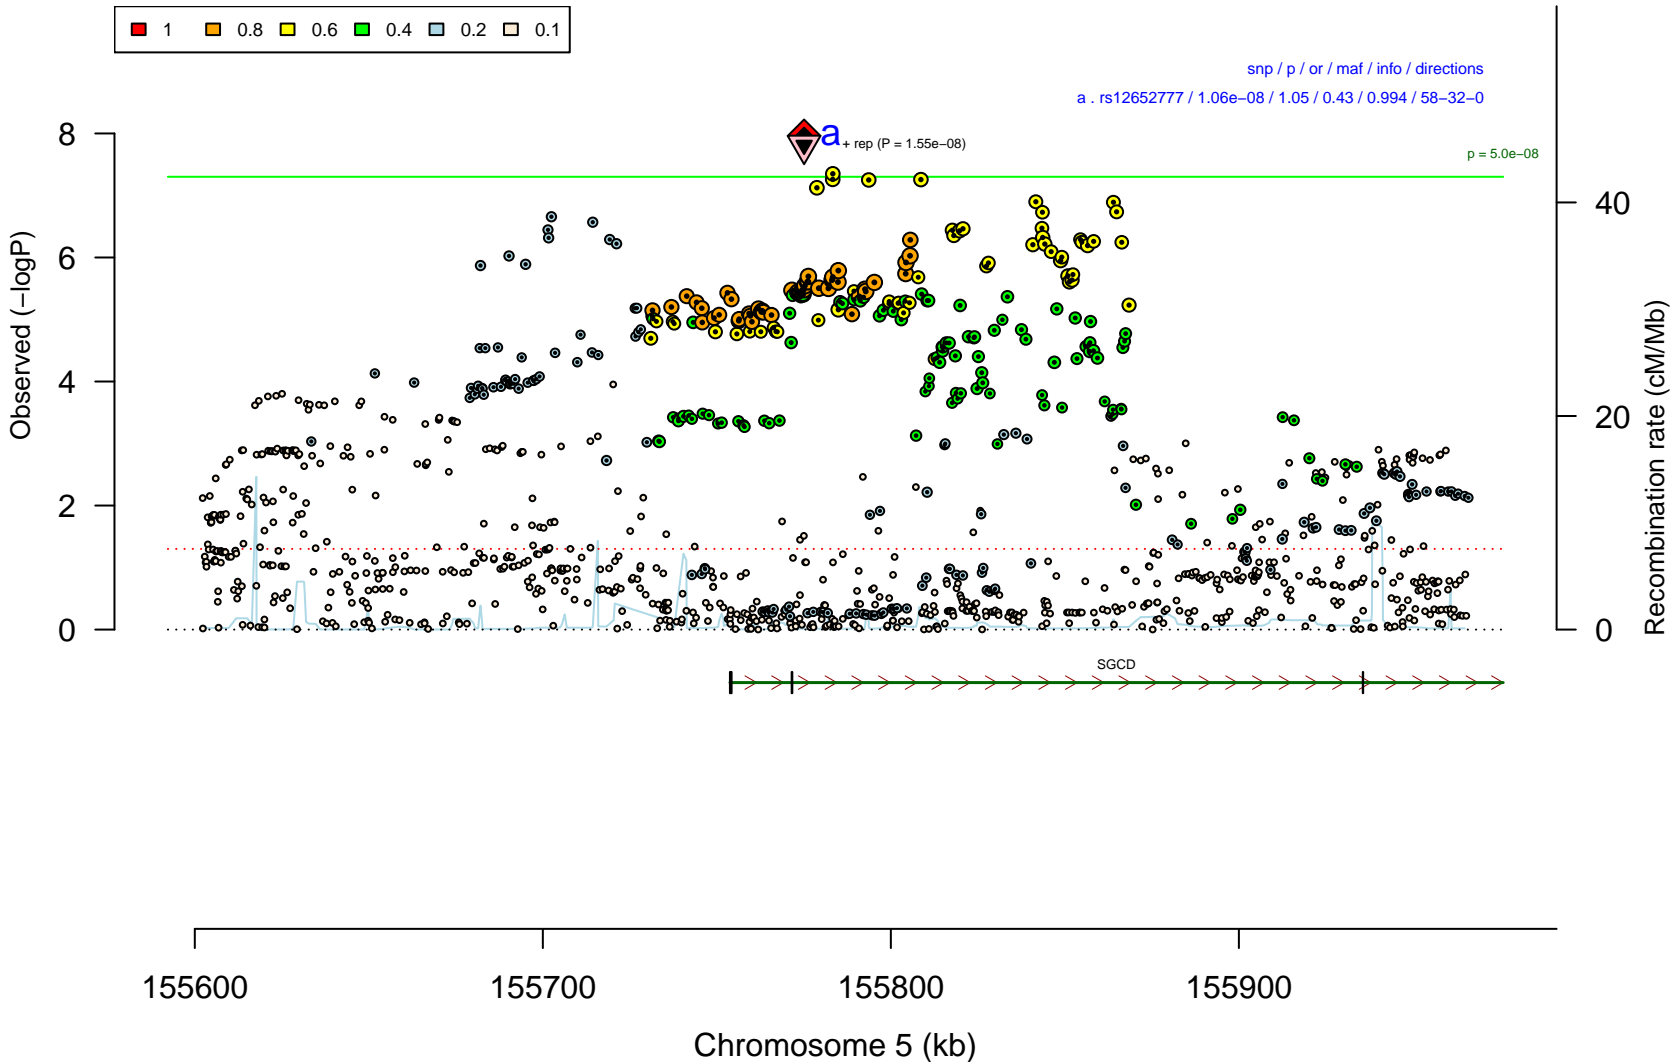

# PGC\_SCZ\_w3\_90\_0418b.243.chr18

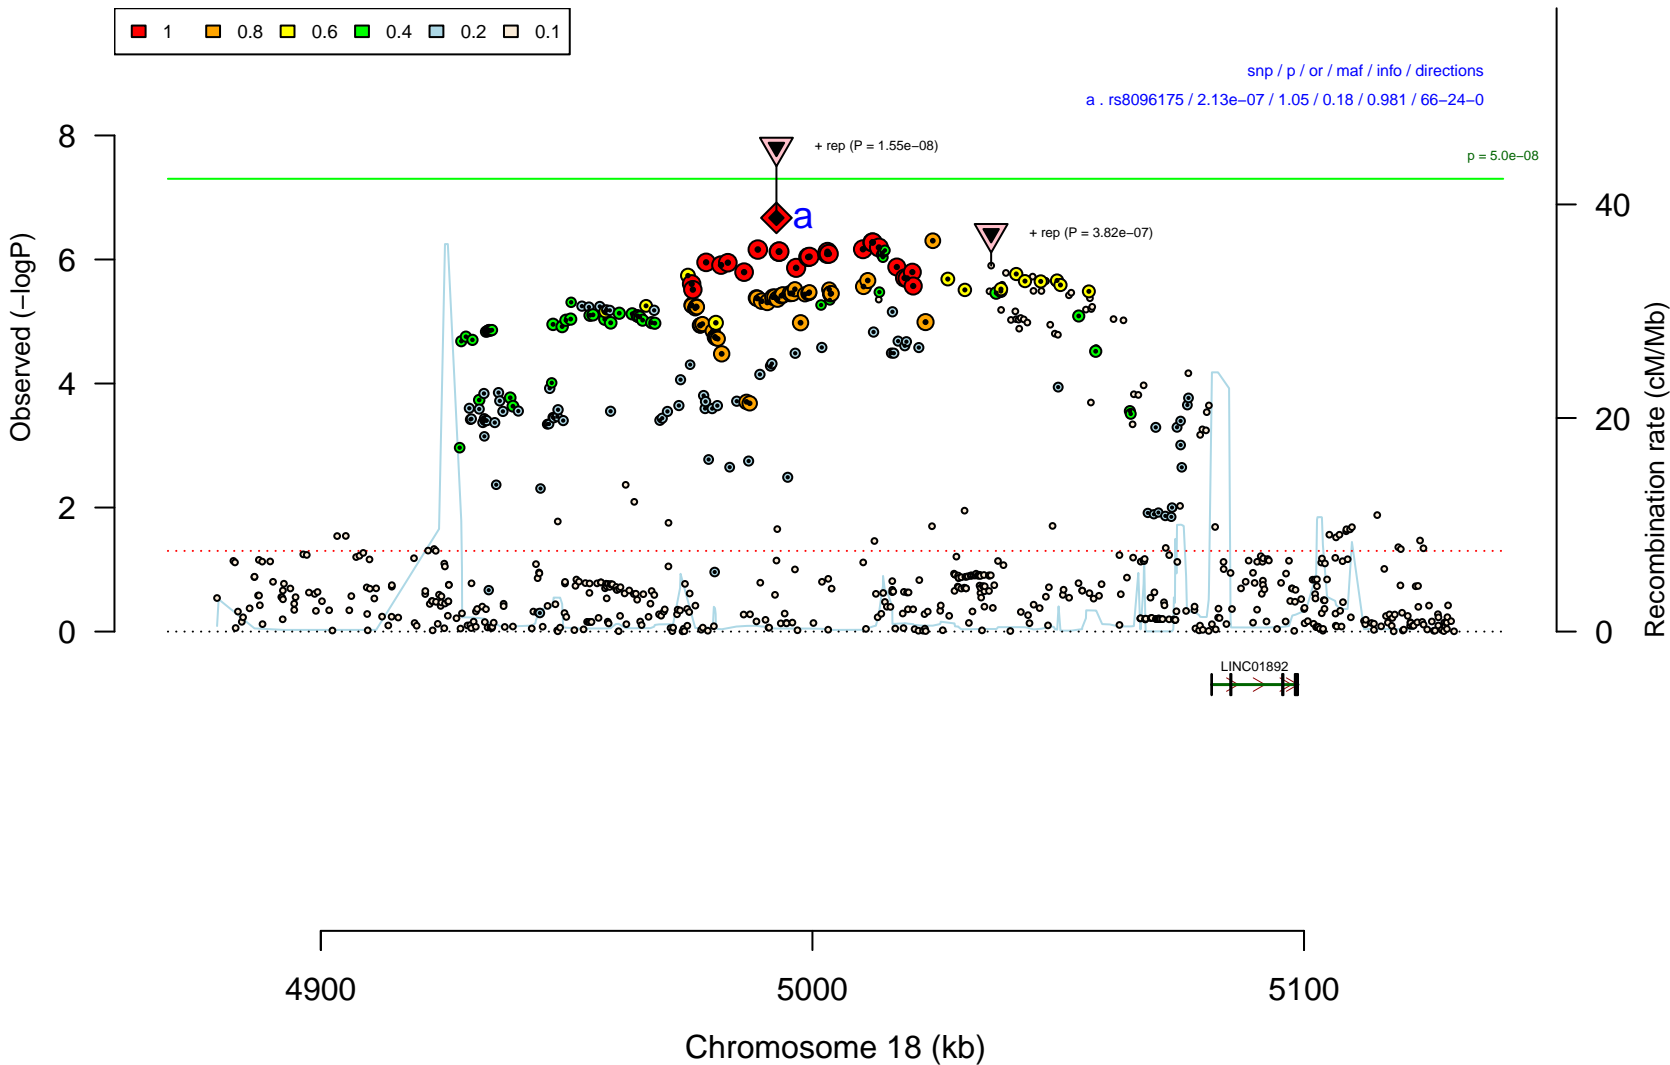



# PGC\_SCZ\_w3\_90\_0418b.44.chr2

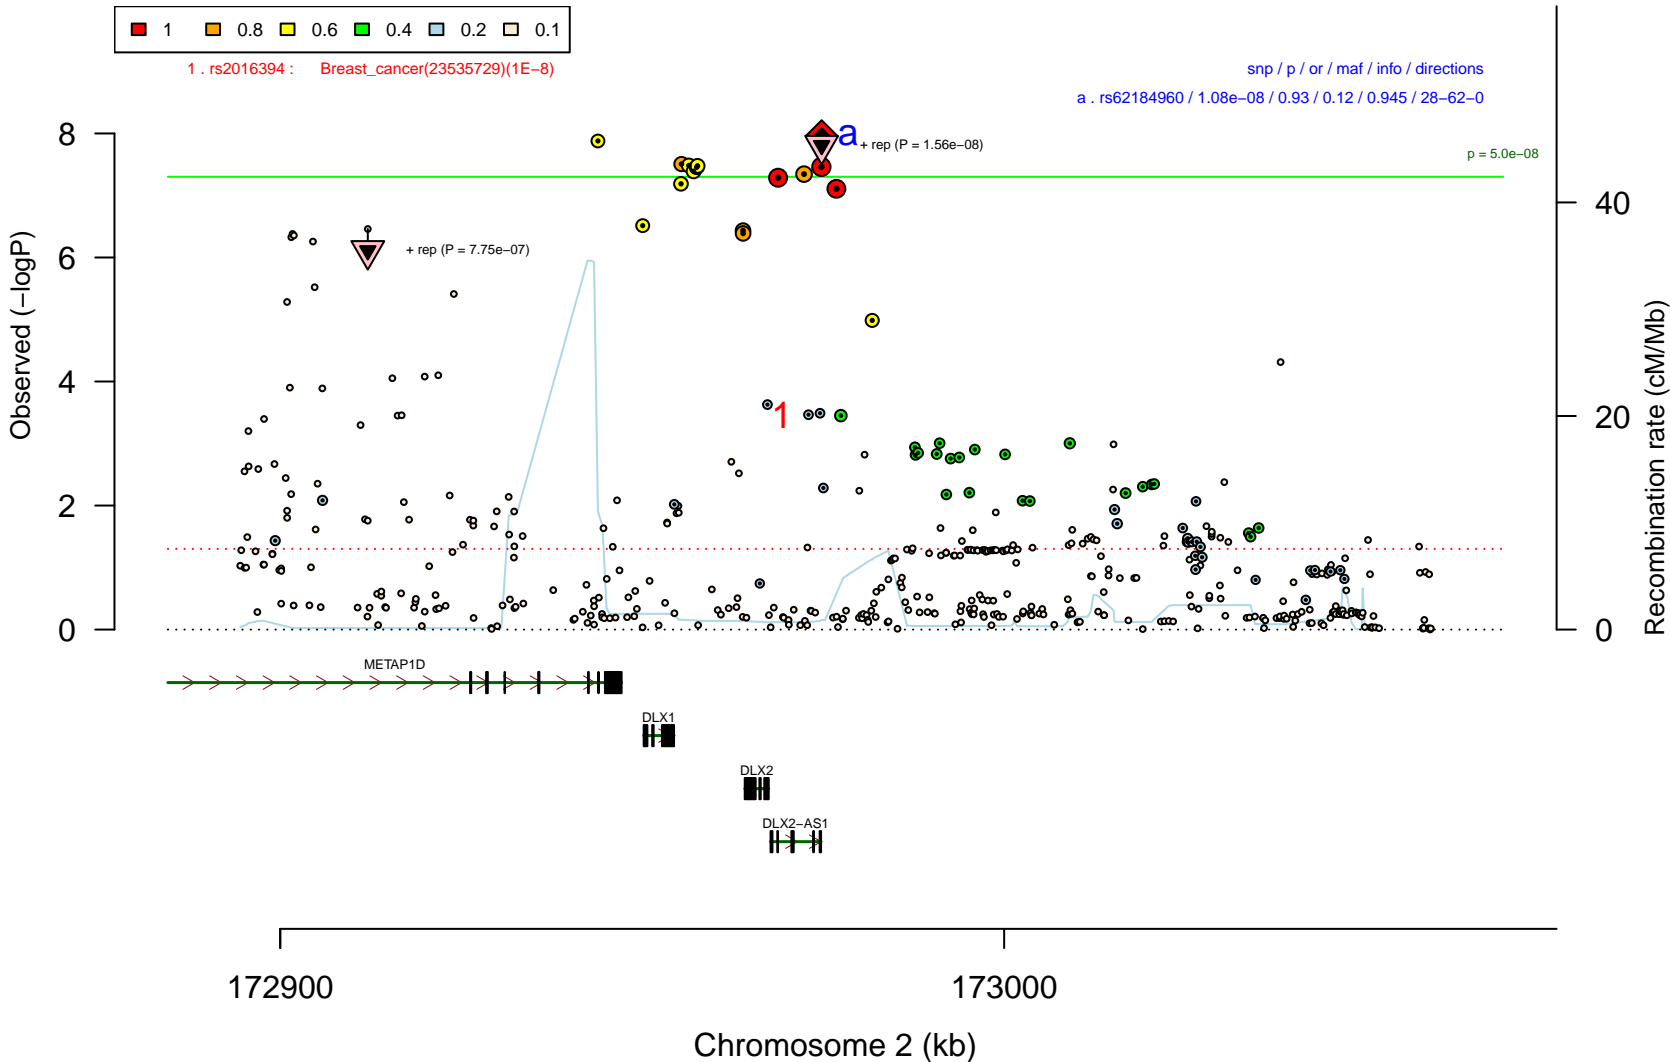

# PGC\_SCZ\_w3\_90\_0418b.158.chr9

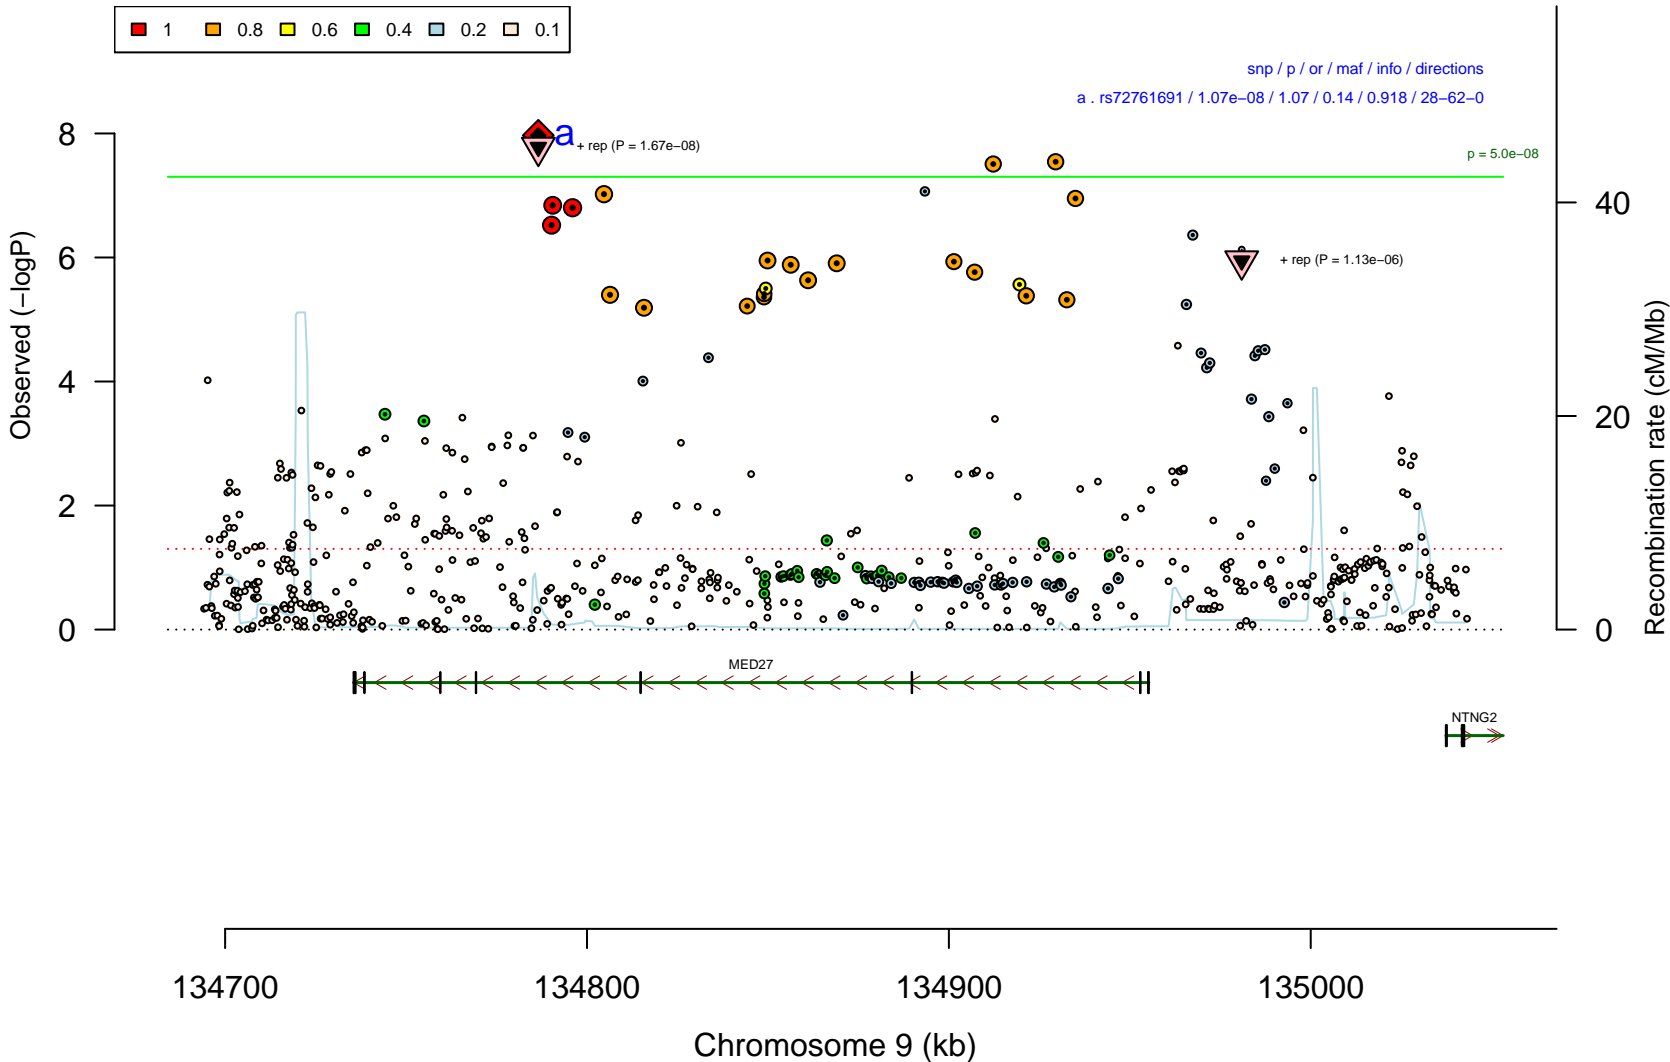

# PGC\_SCZ\_w3\_90\_0418b.162.chr10

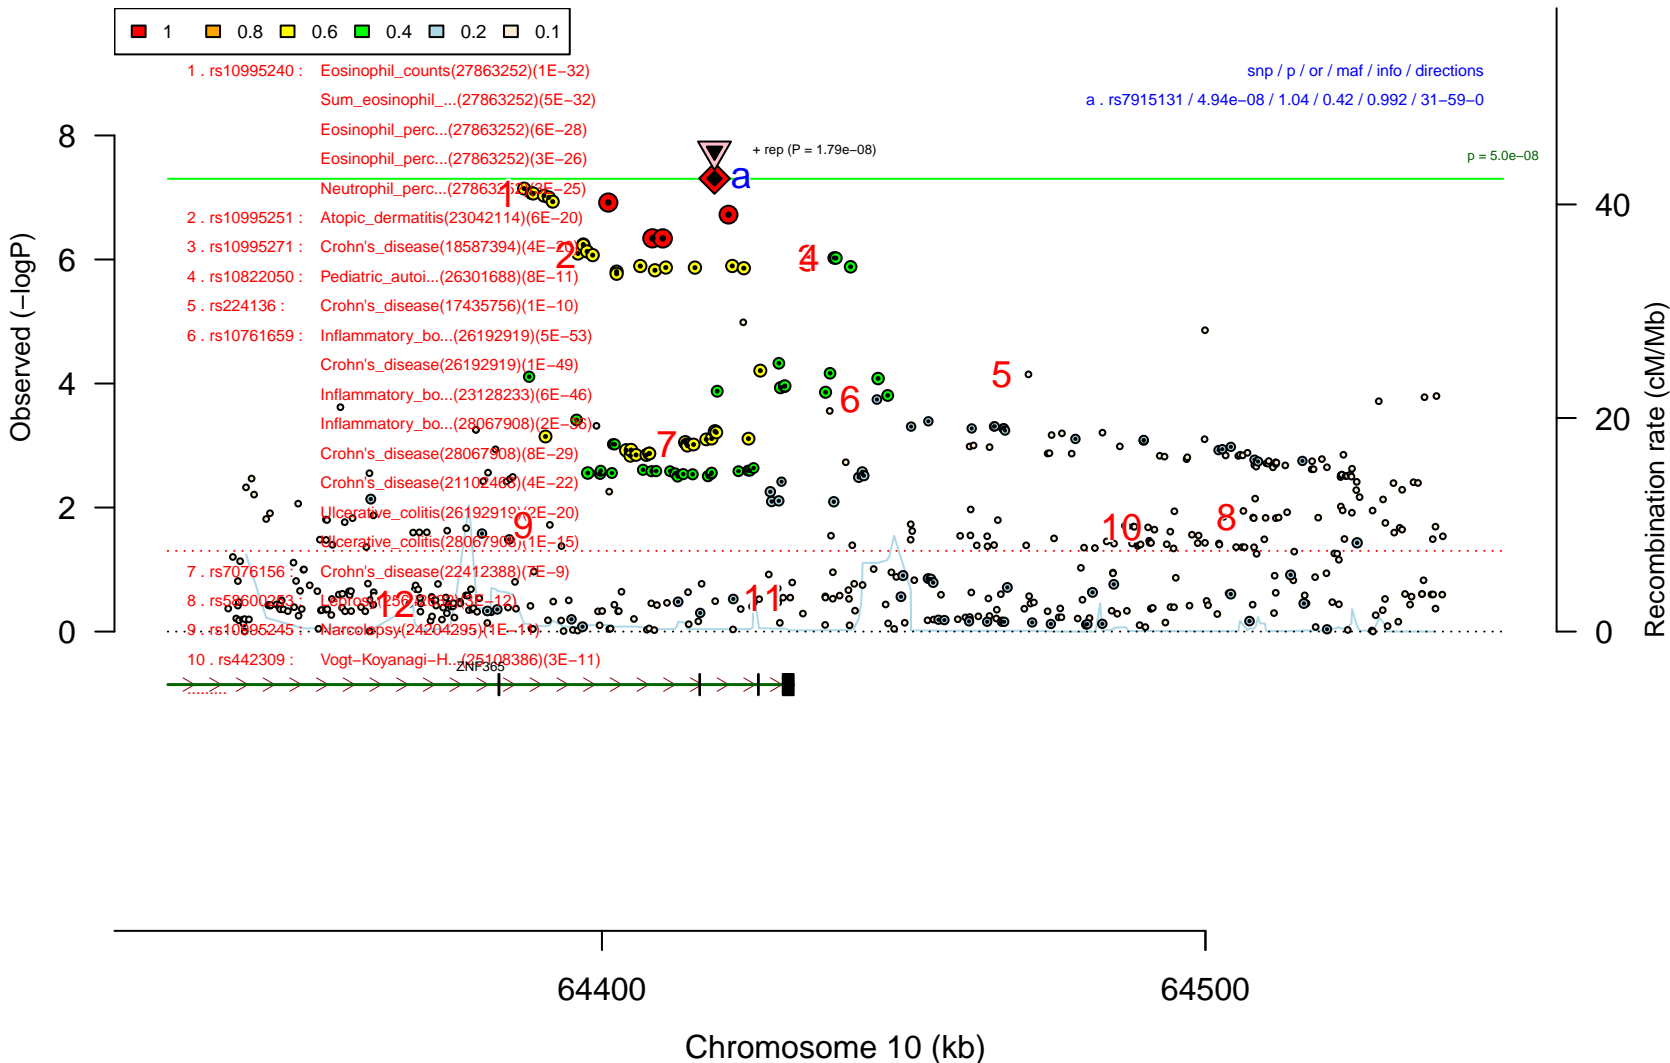

# PGC\_SCZ\_w3\_90\_0418b.205.chr13

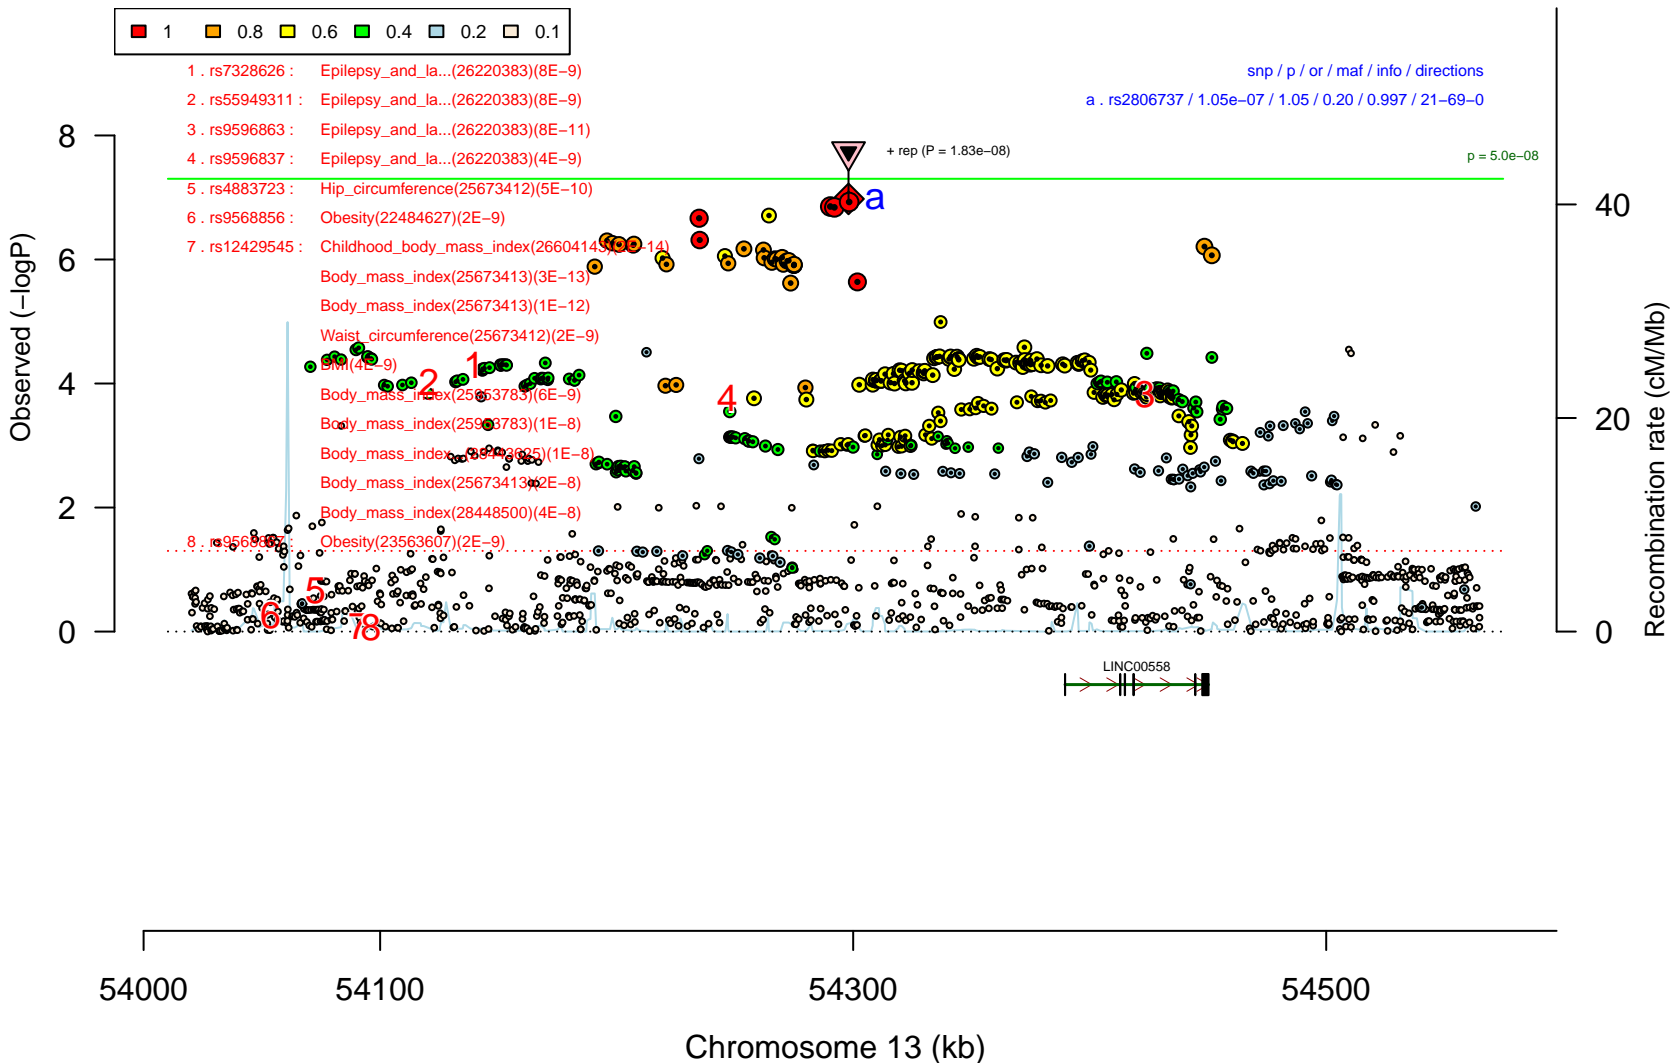

# PGC\_SCZ\_w3\_90\_0418b.65.chr3

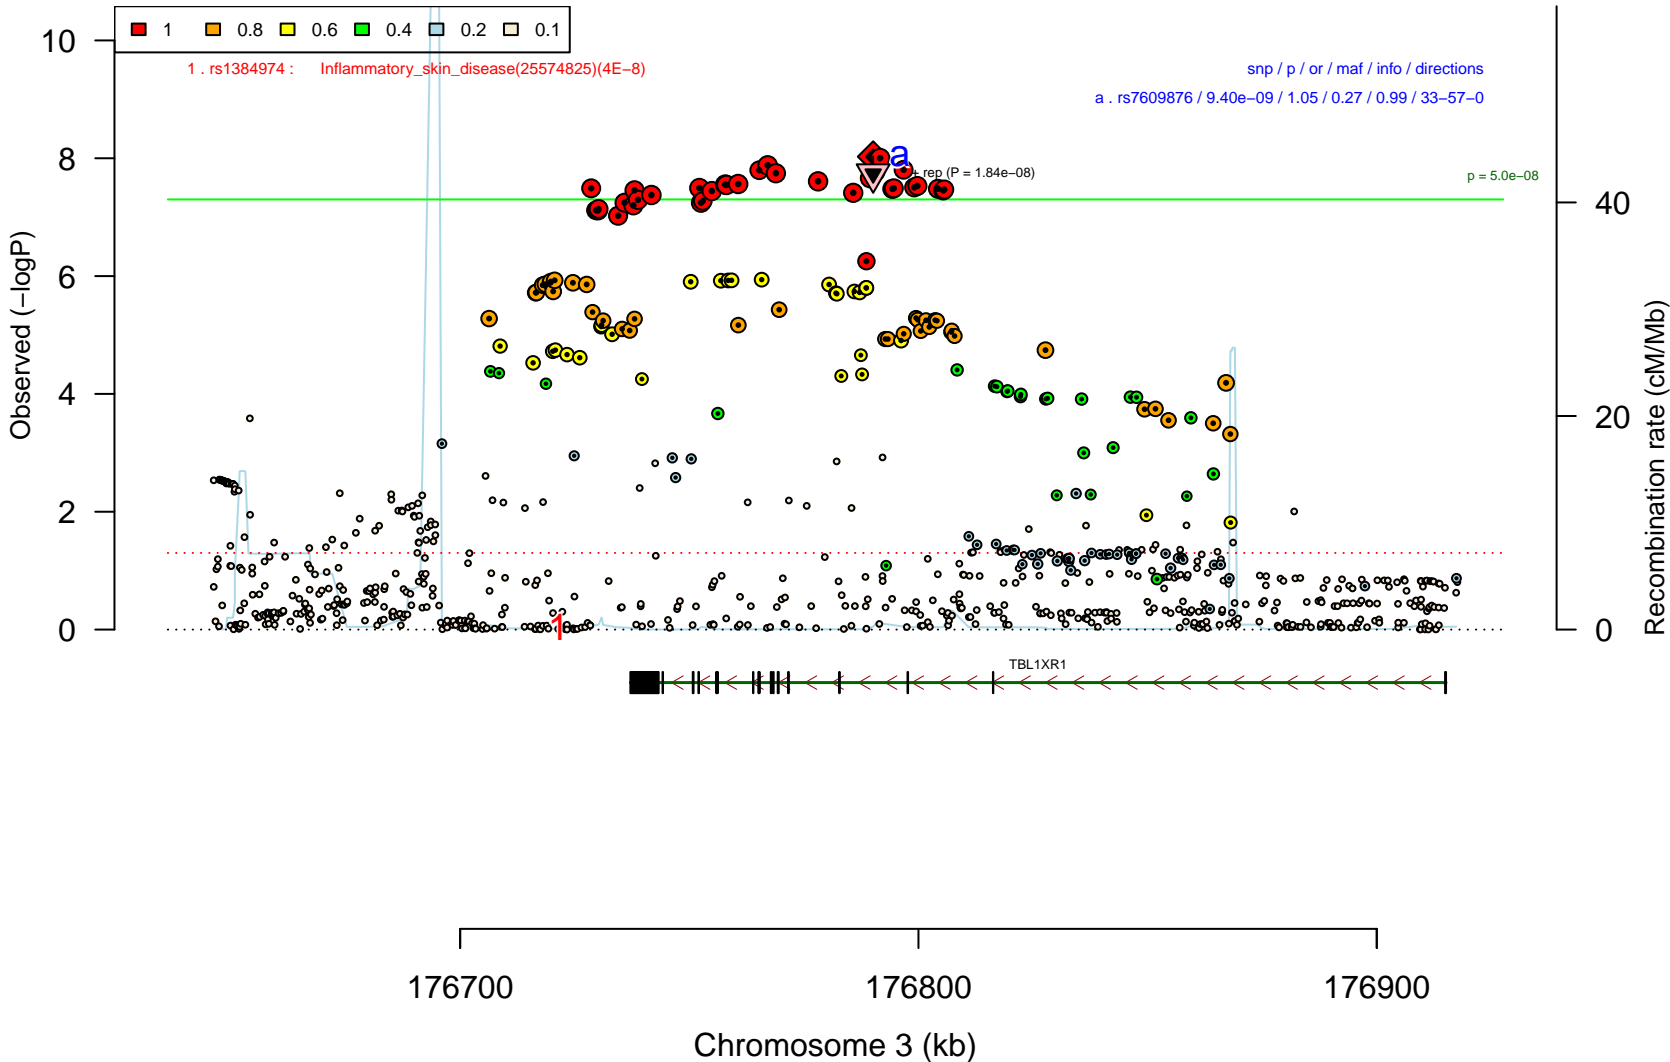

# PGC\_SCZ\_w3\_90\_0418b.239.chr17

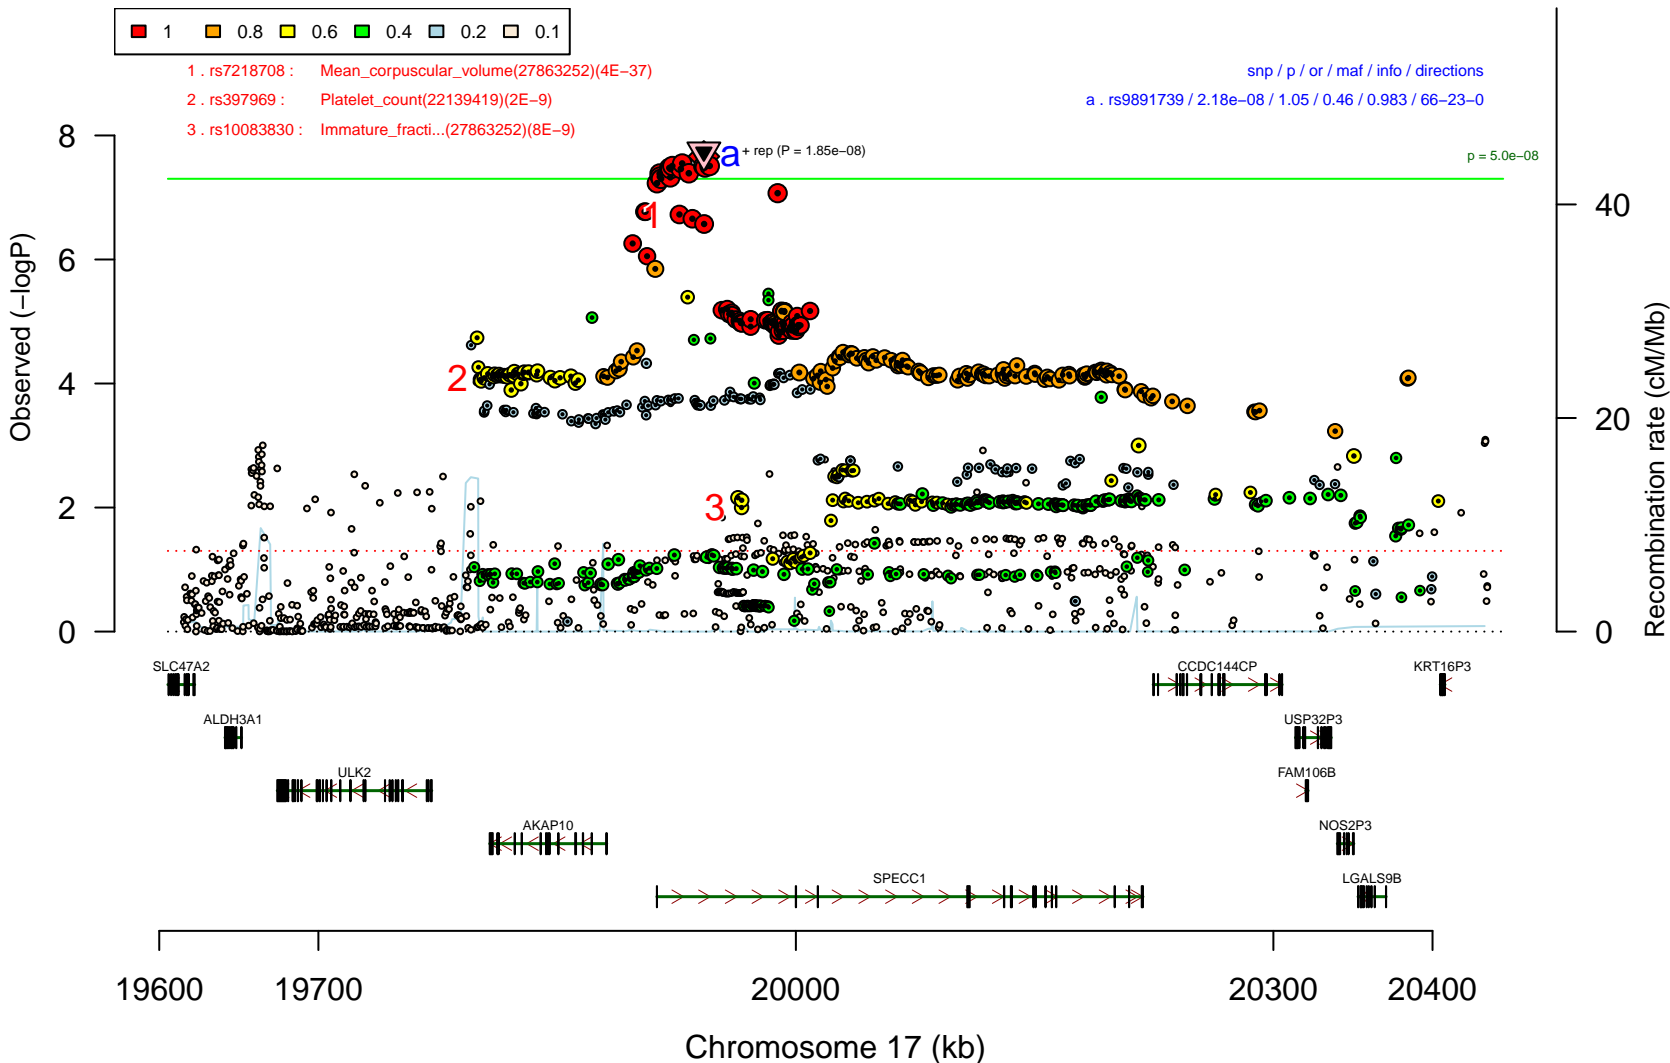

# PGC\_SCZ\_w3\_90\_0418b.80.chr5

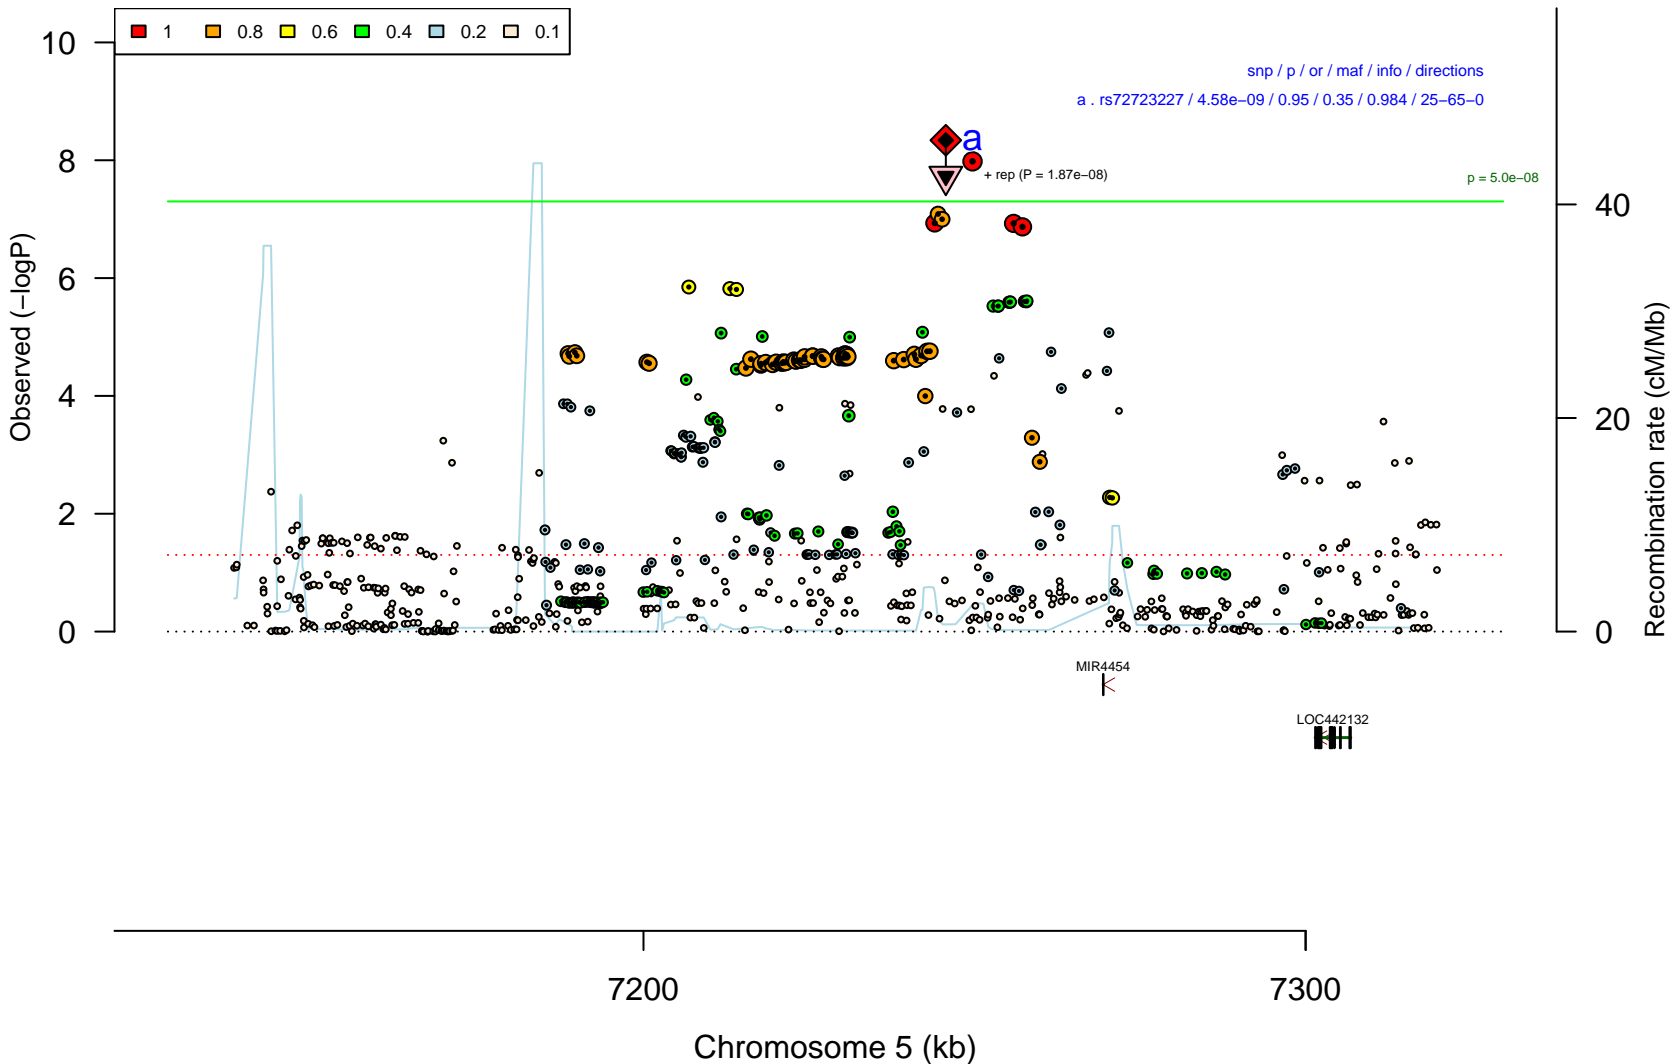

# PGC\_SCZ\_w3\_90\_0418b.190.chr12

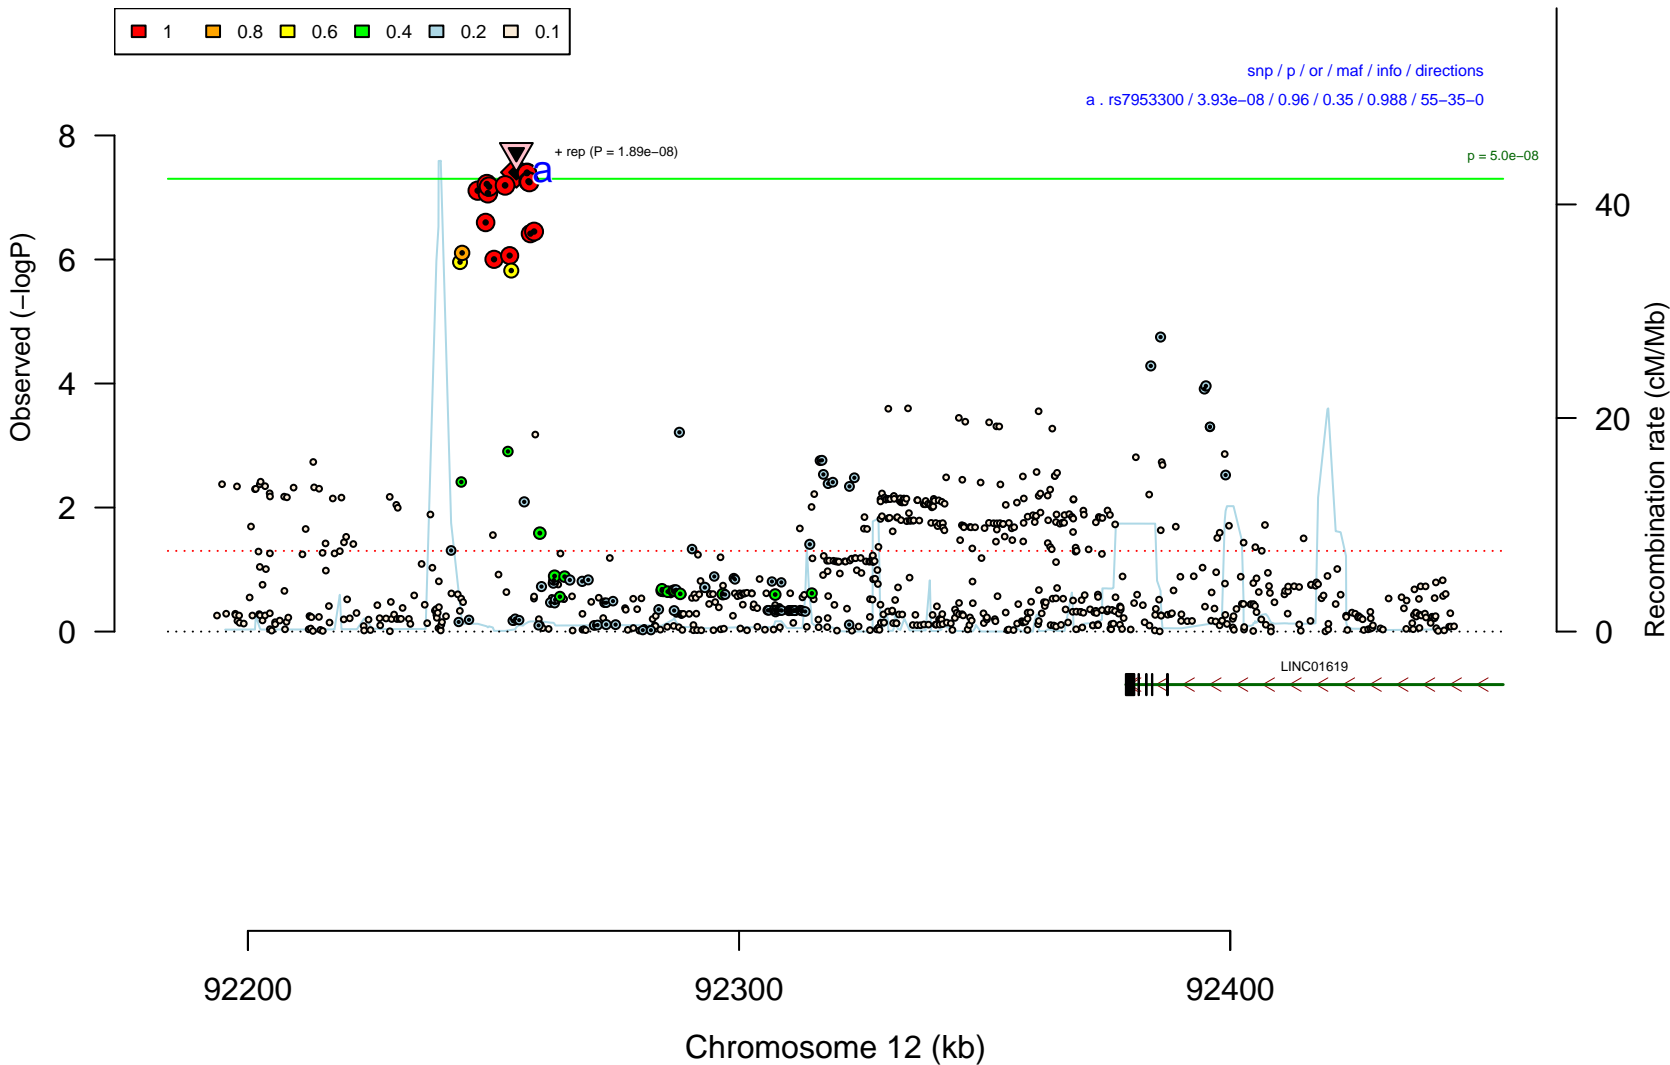



# PGC\_SCZ\_w3\_90\_0418b.54.chr3

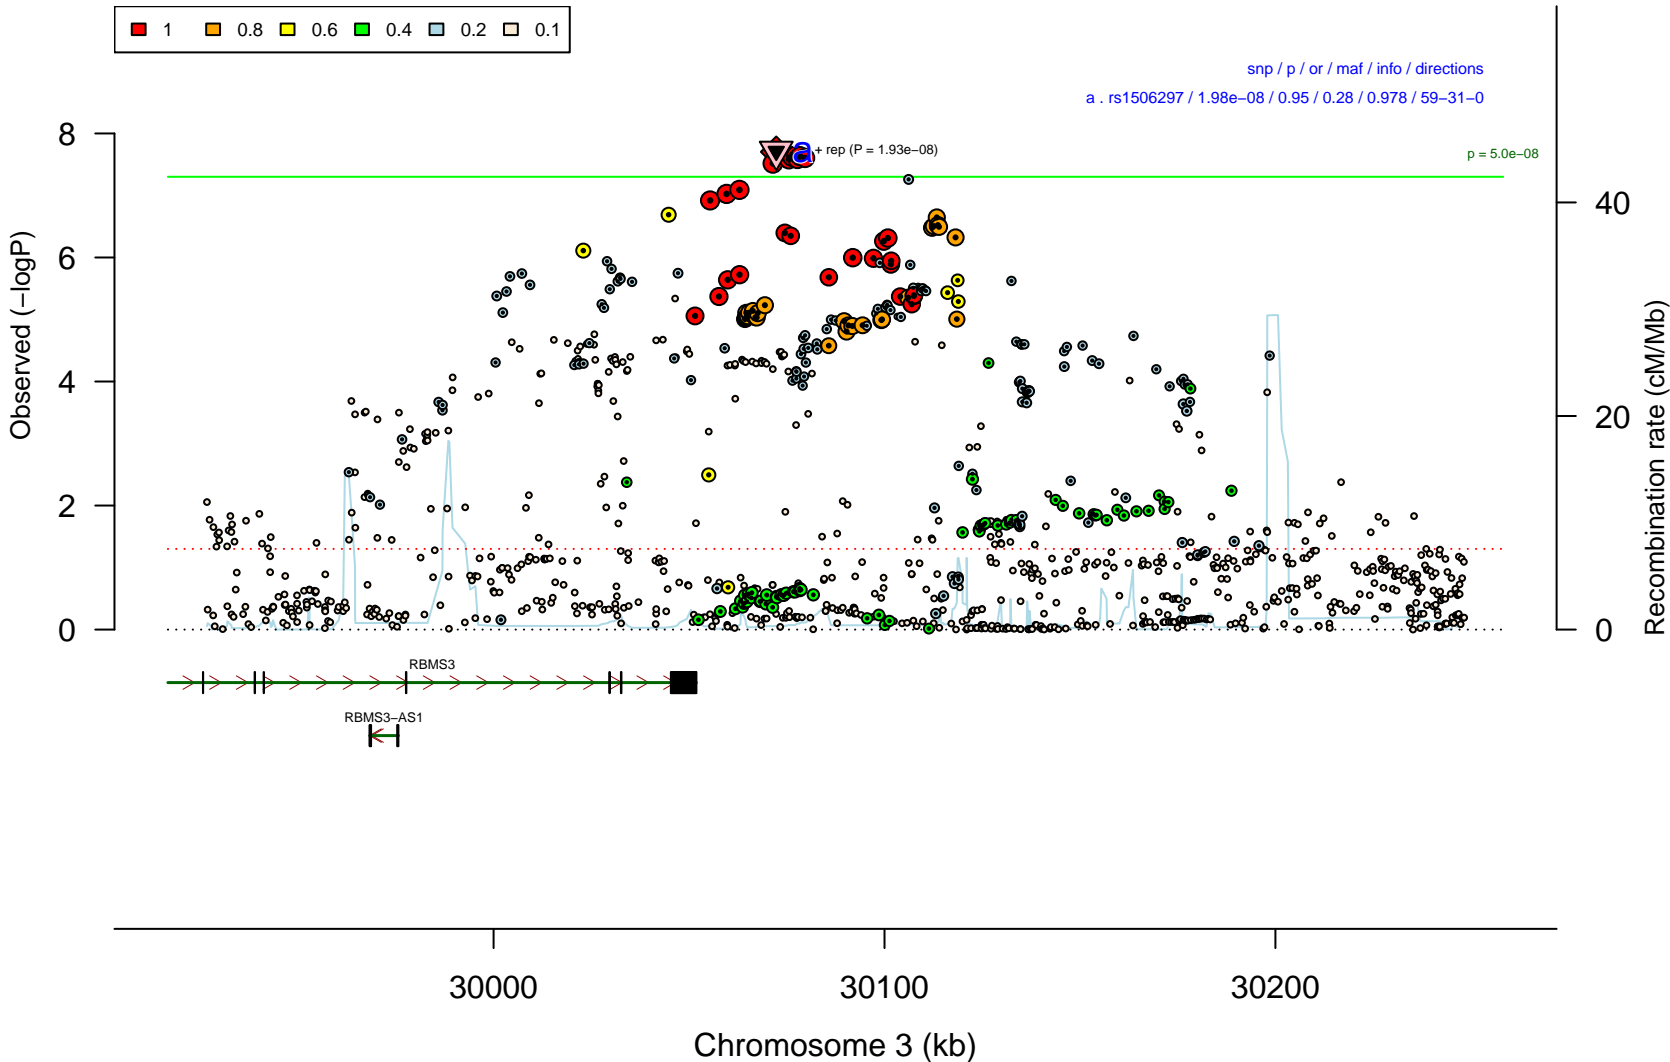

# PGC\_SCZ\_w3\_90\_0418b.139.chr8

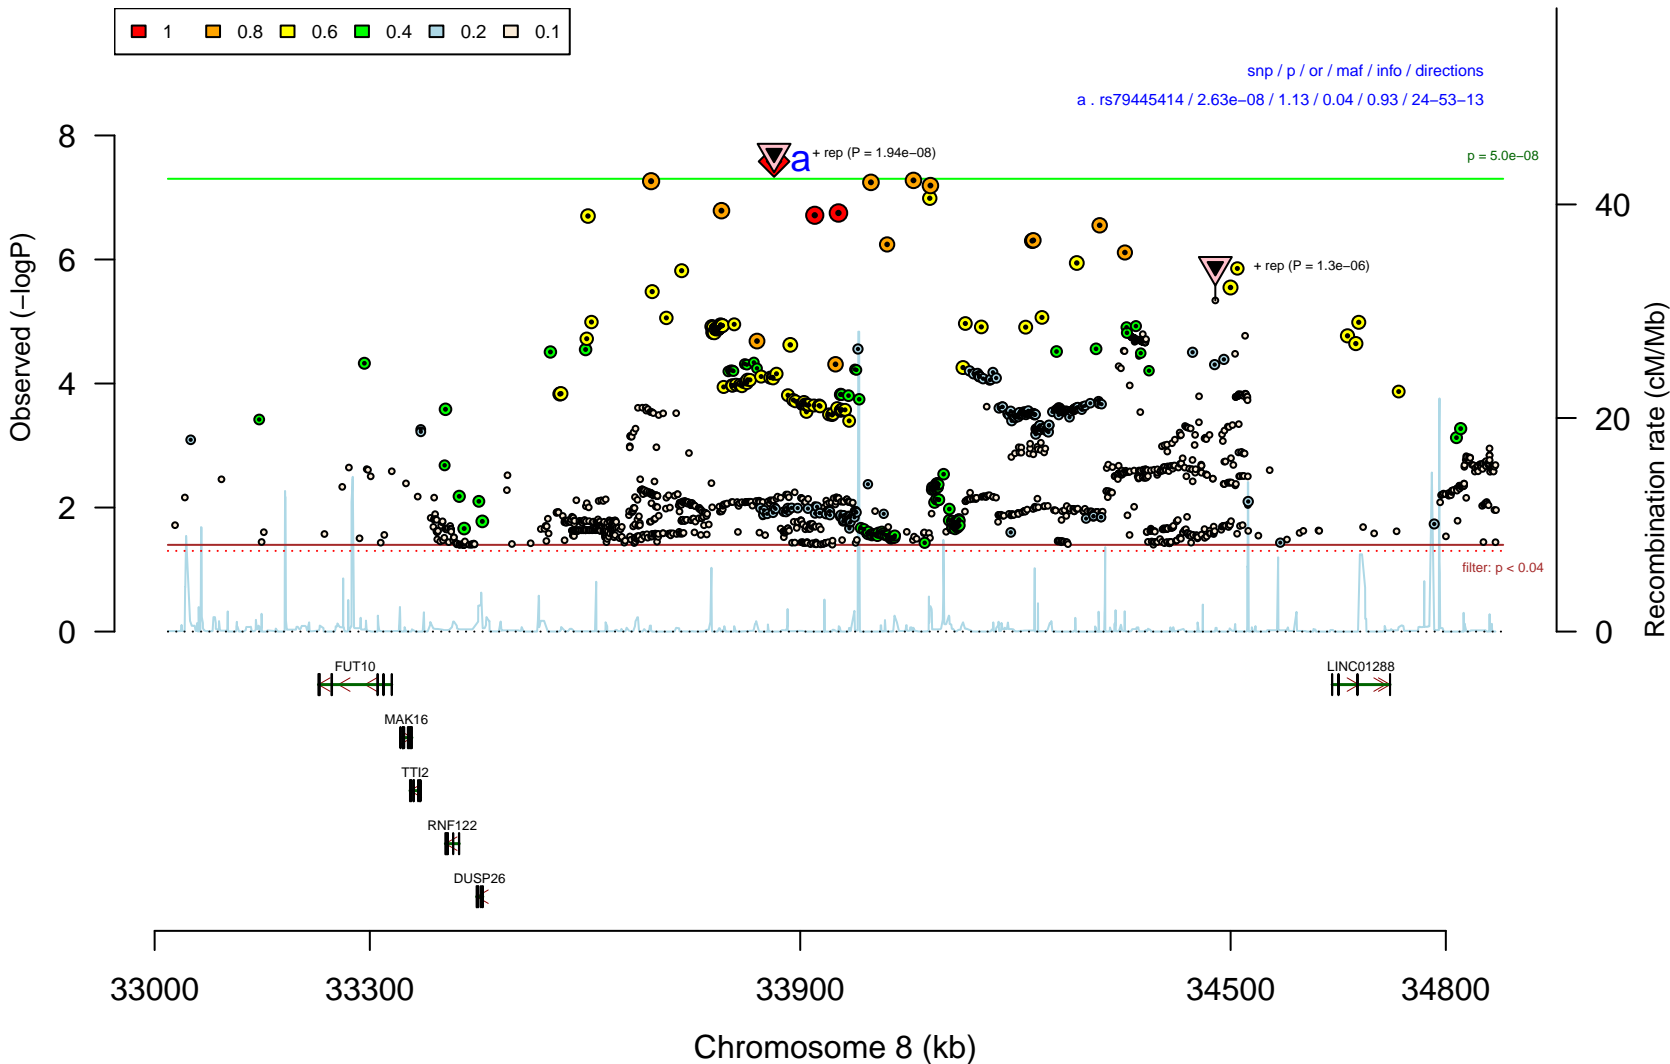

# PGC\_SCZ\_w3\_90\_0418b.75.chr4

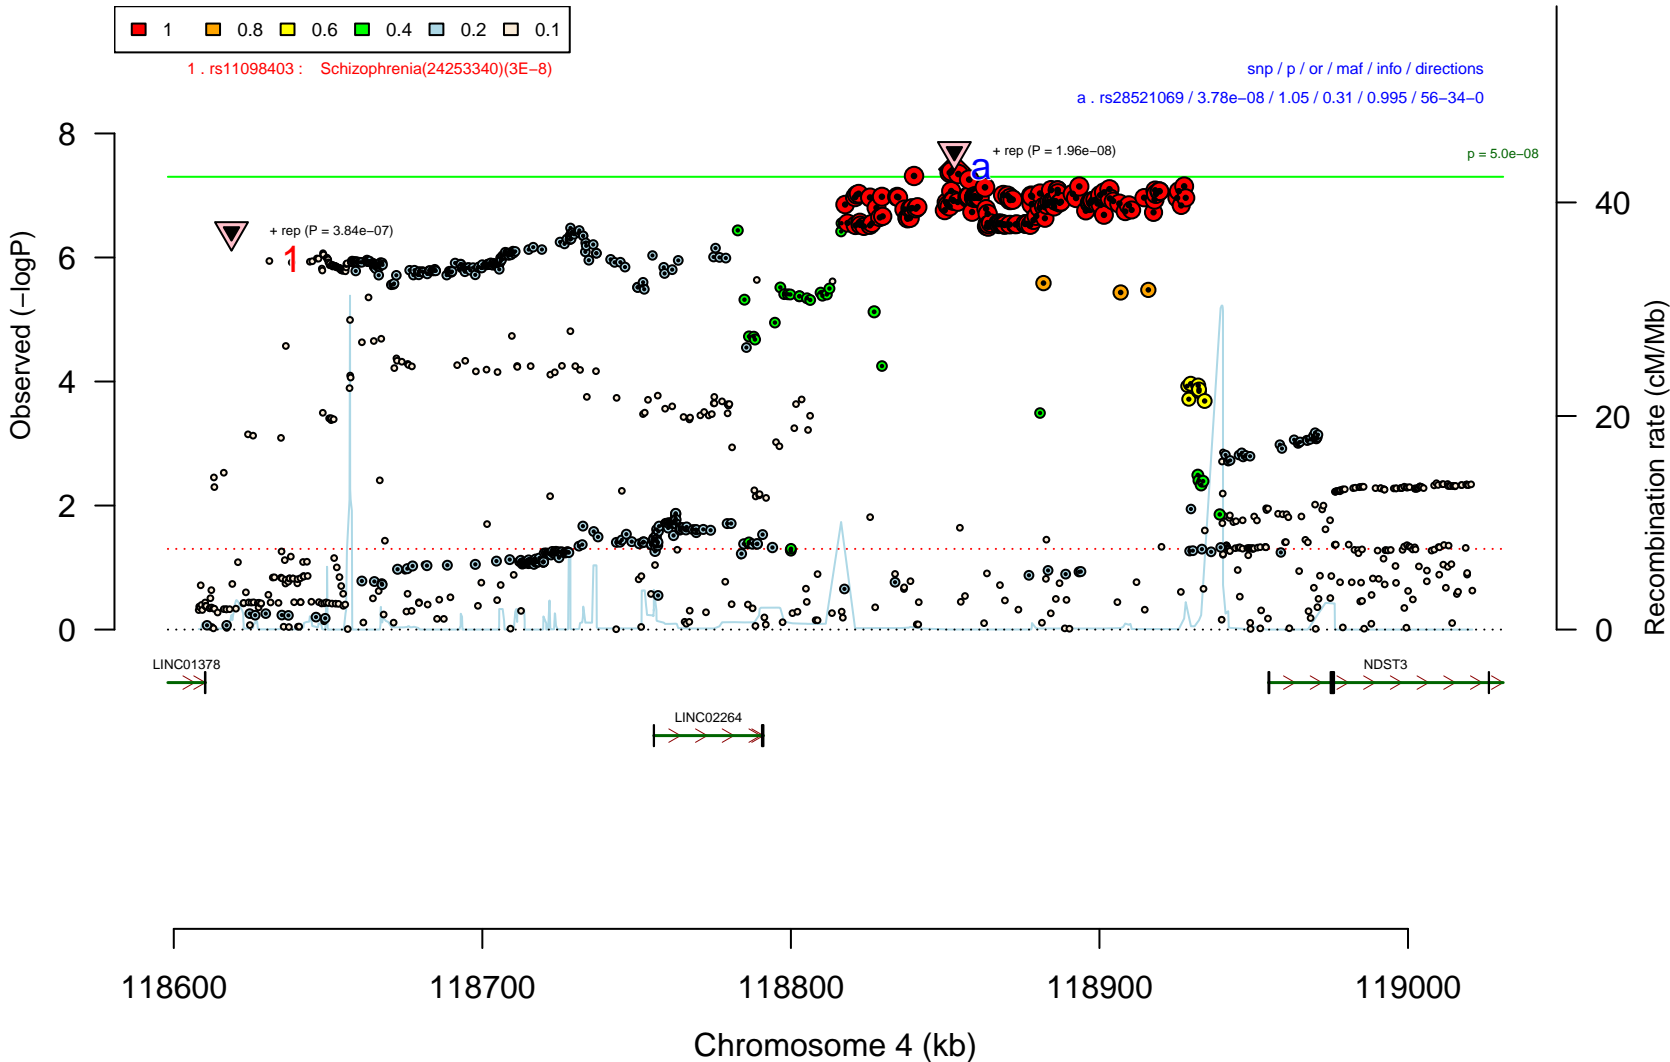

PGC\_SCZ\_w3\_90\_0418b.129.chr7

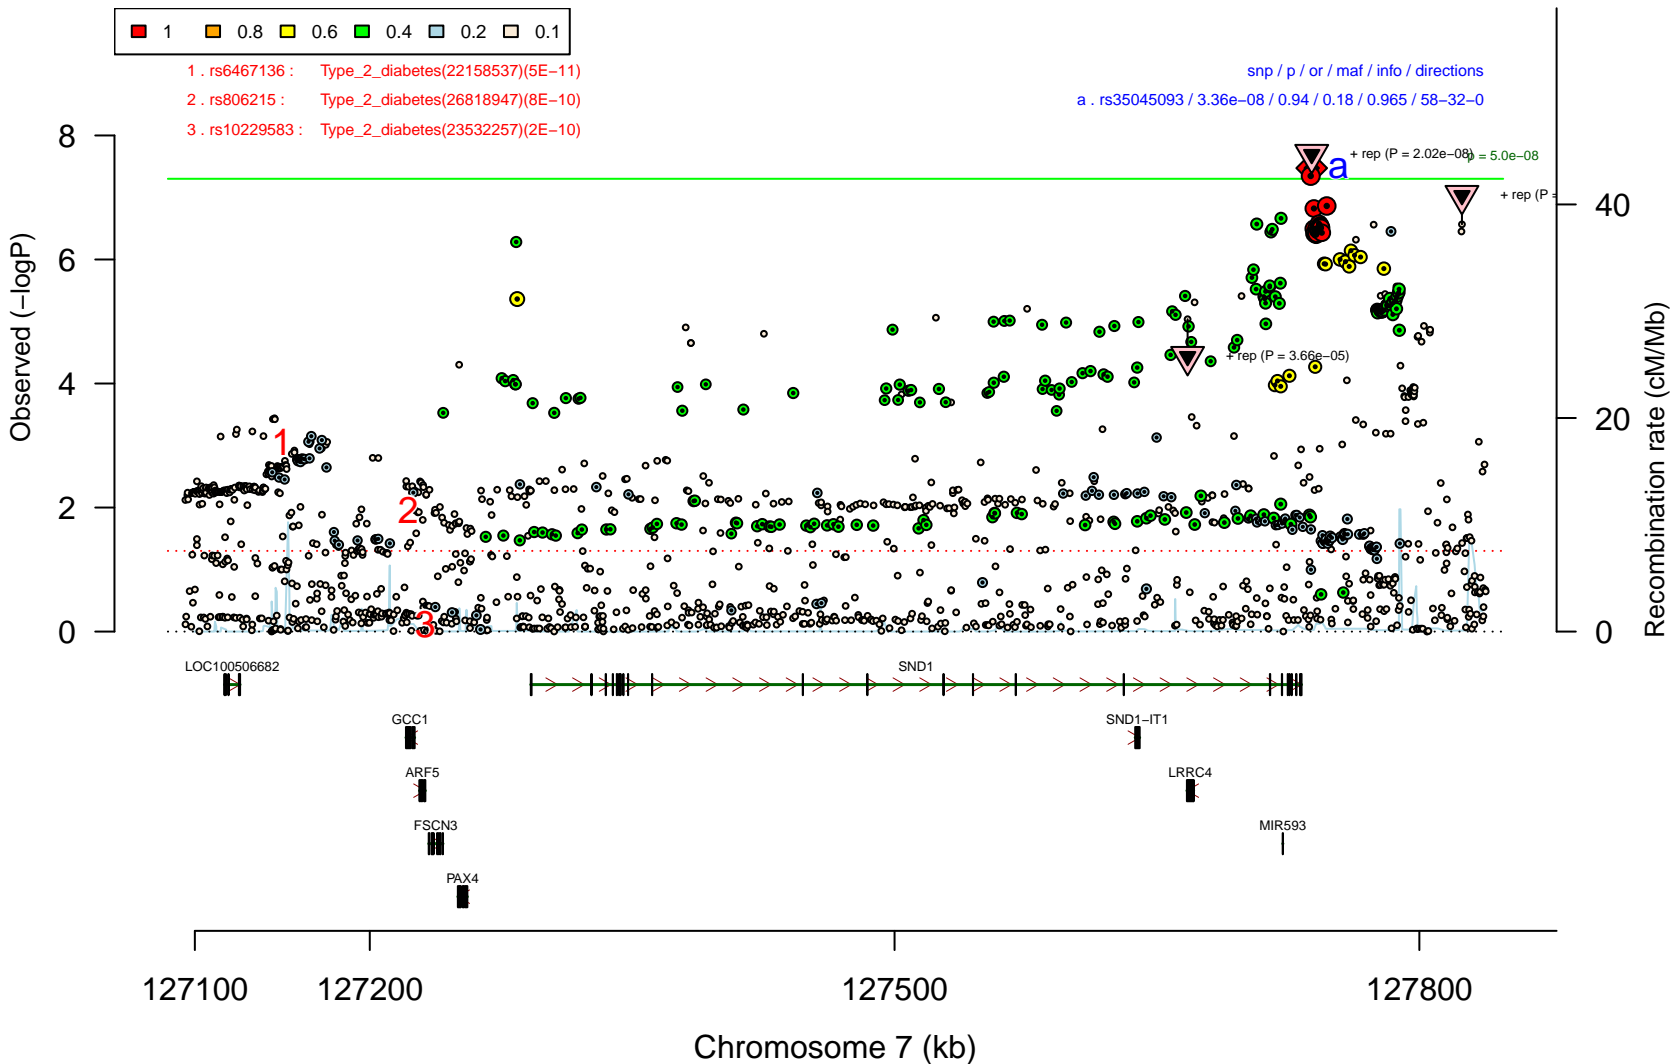

# PGC\_SCZ\_w3\_90\_0418b.89.chr5

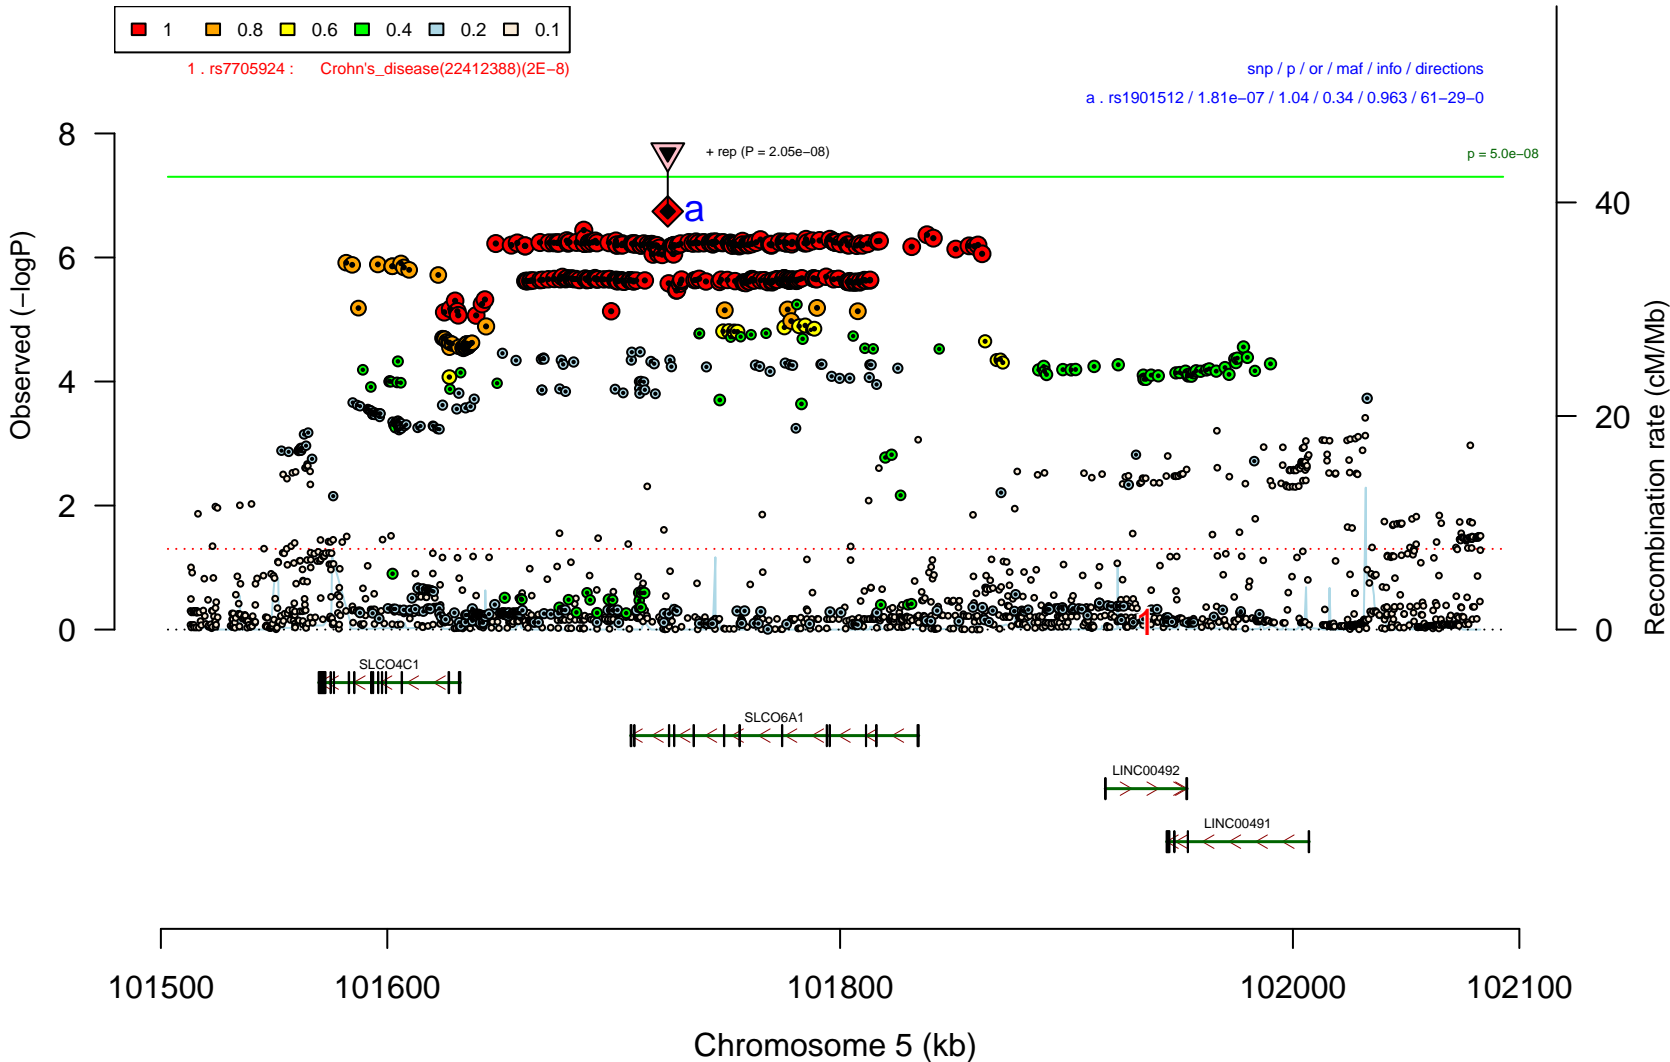

# PGC\_SCZ\_w3\_90\_0418b.76.chr4

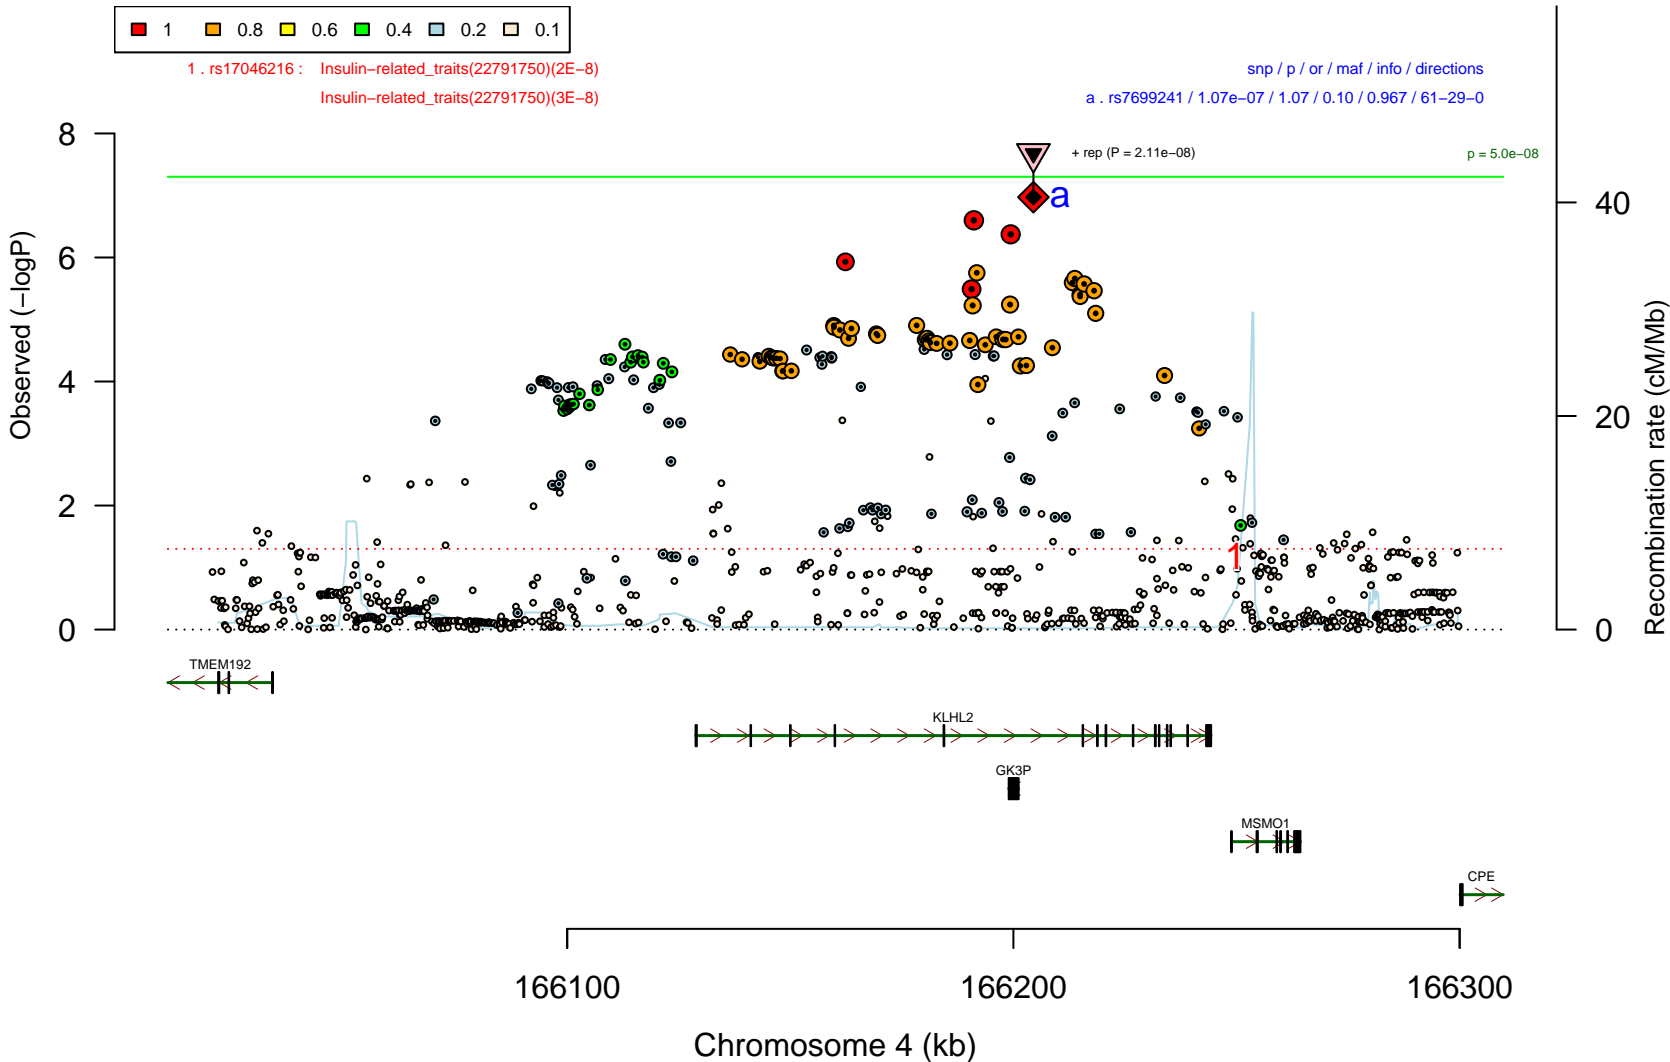

# PGC\_SCZ\_w3\_90\_0418b.95.chr5

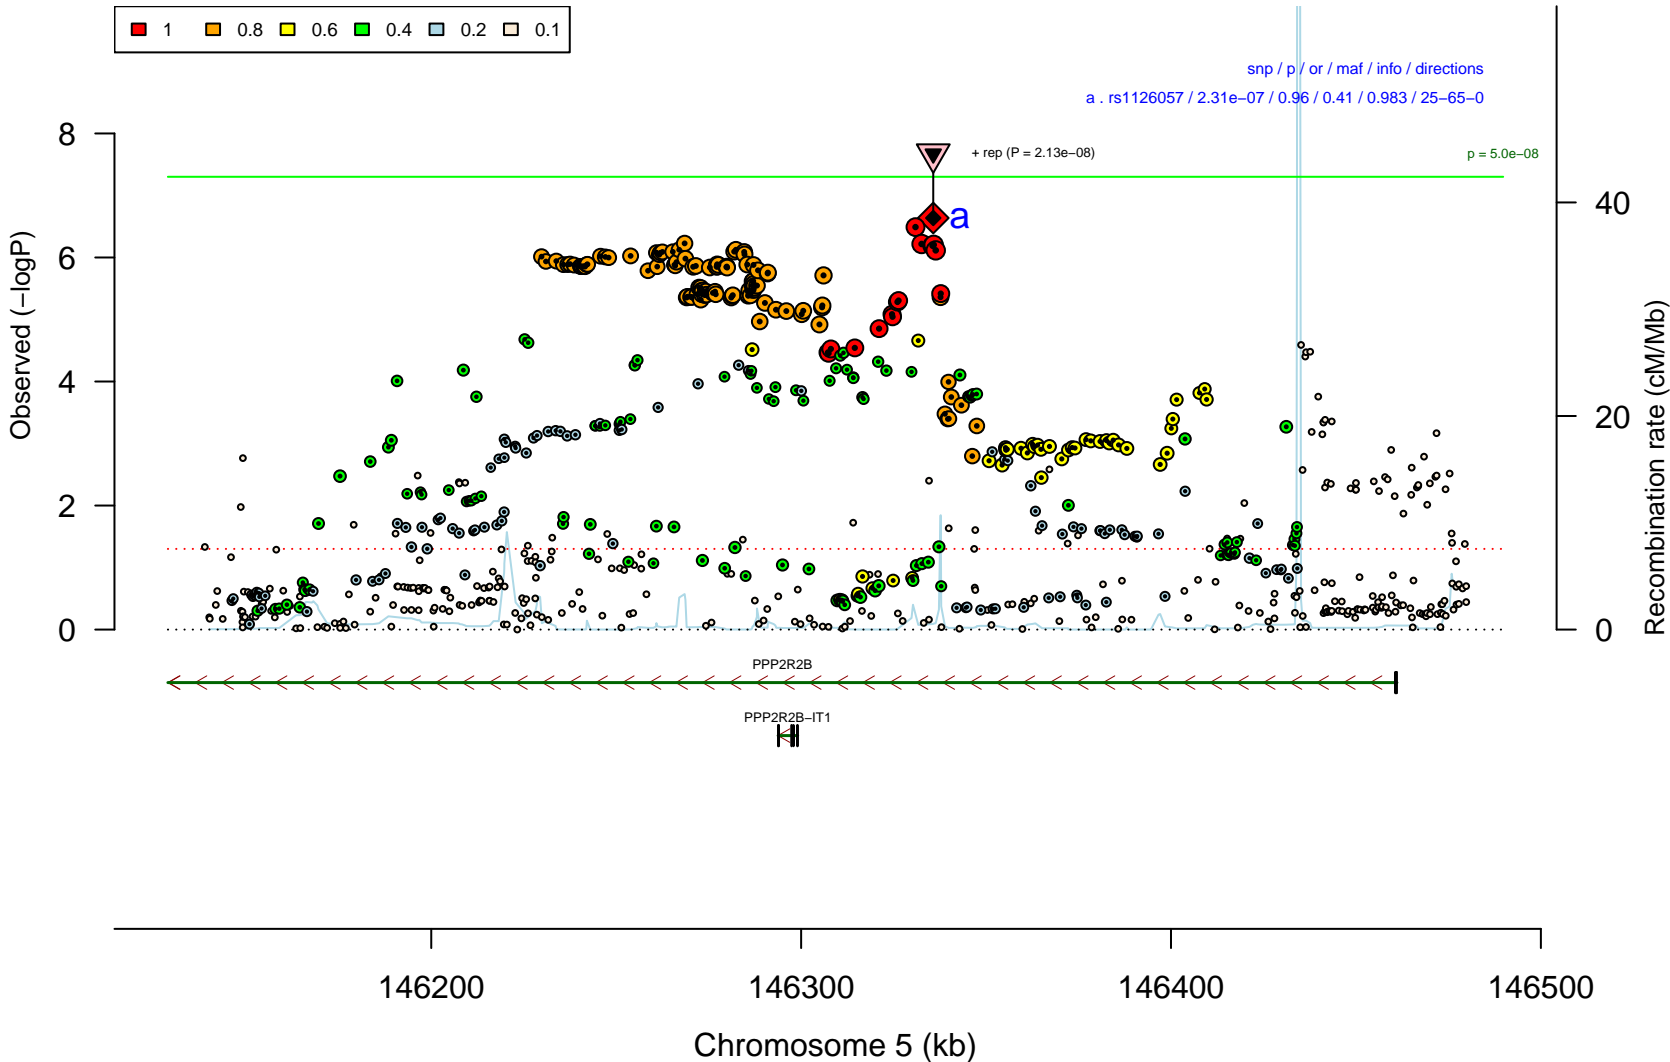

# PGC\_SCZ\_w3\_90\_0418b.173.chr11

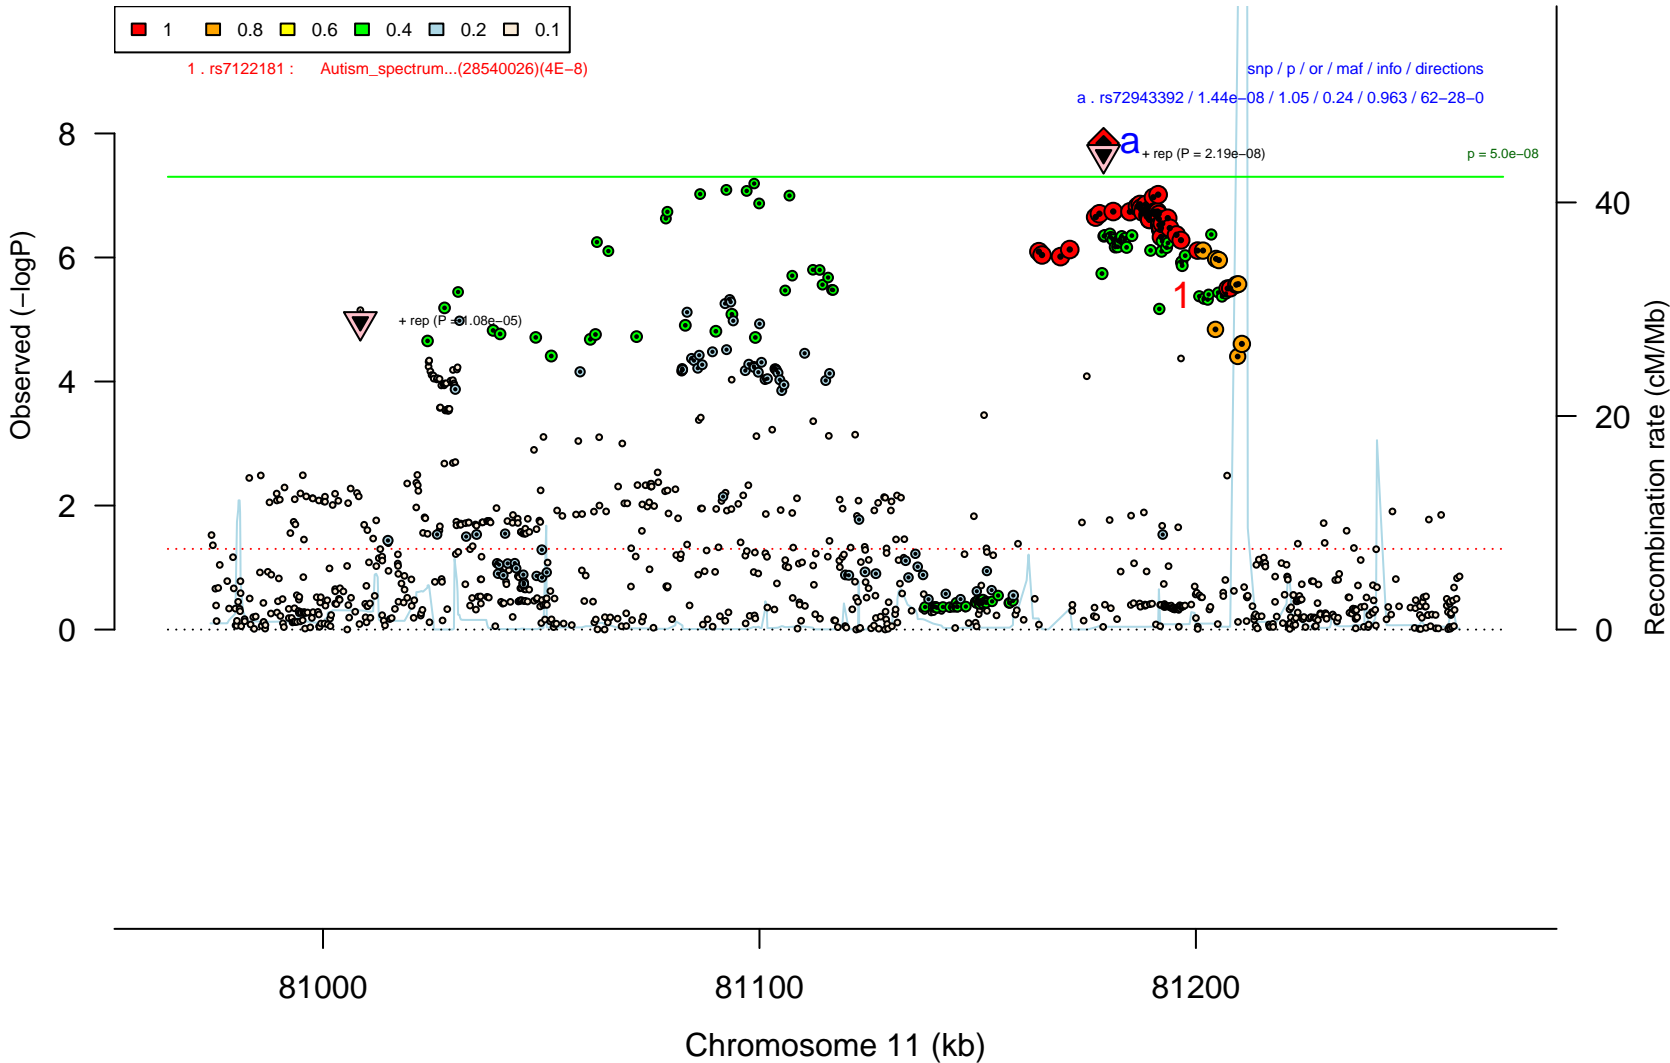



# PGC\_SCZ\_w3\_90\_0418b.27.chr2

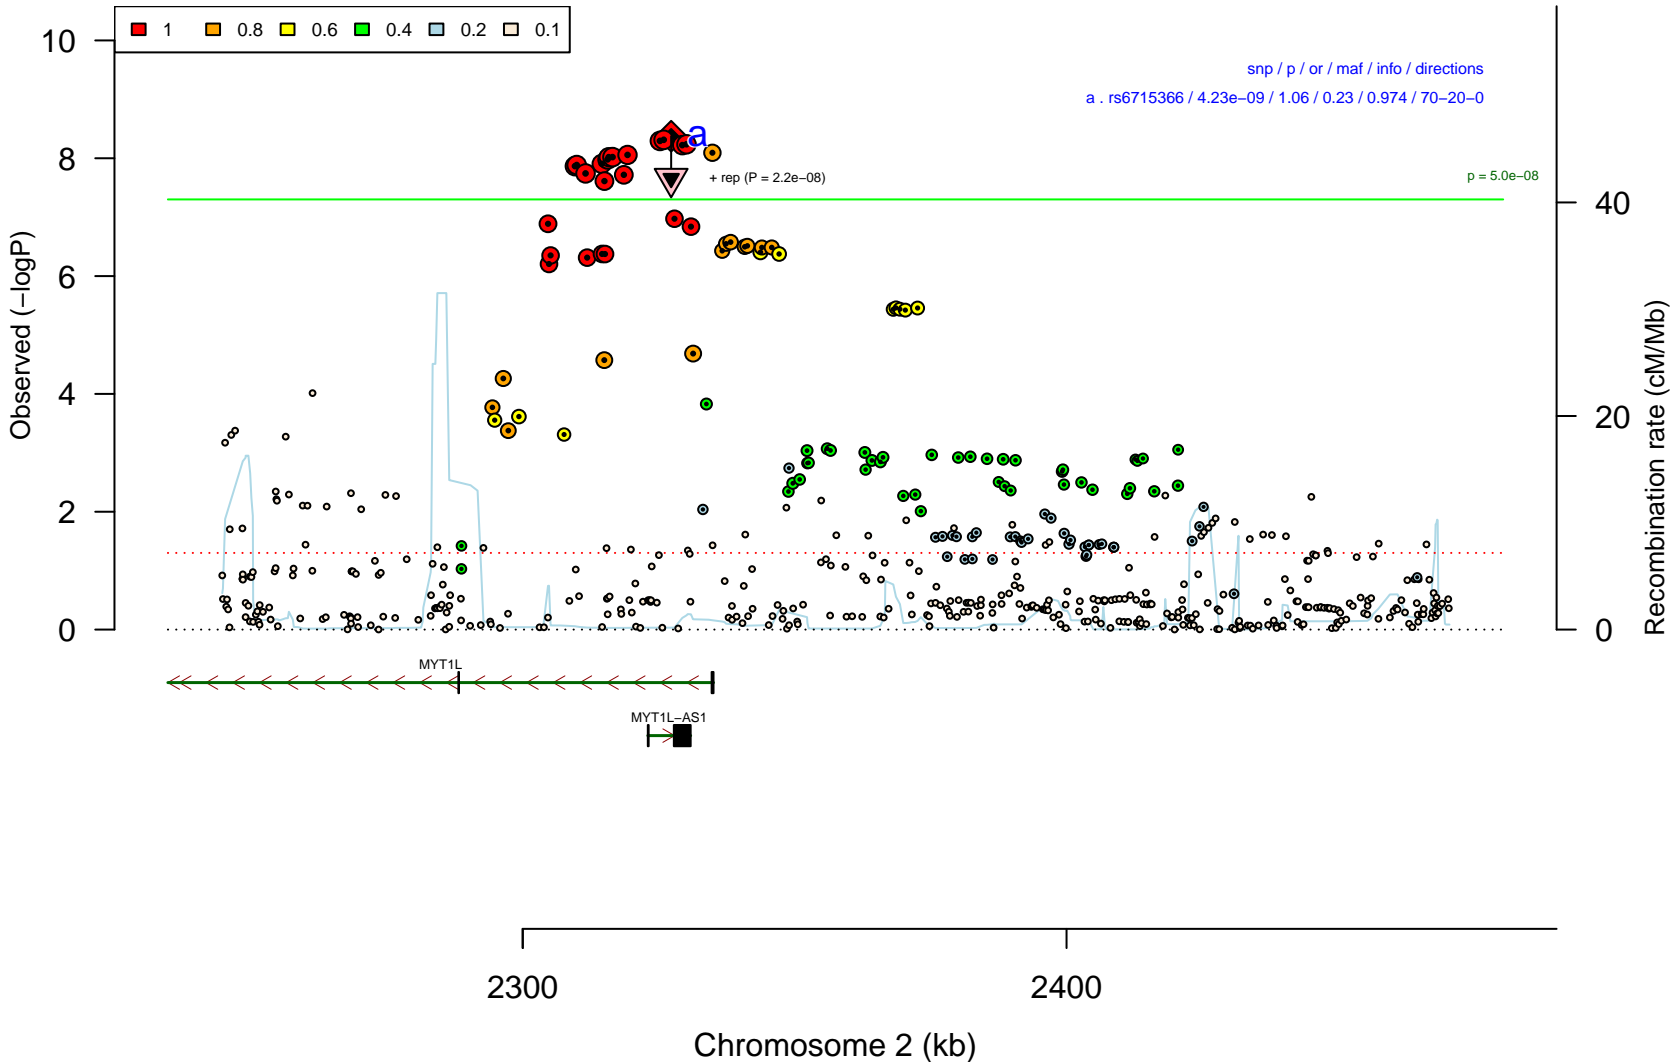

# PGC\_SCZ\_w3\_90\_0418b.102.chr6

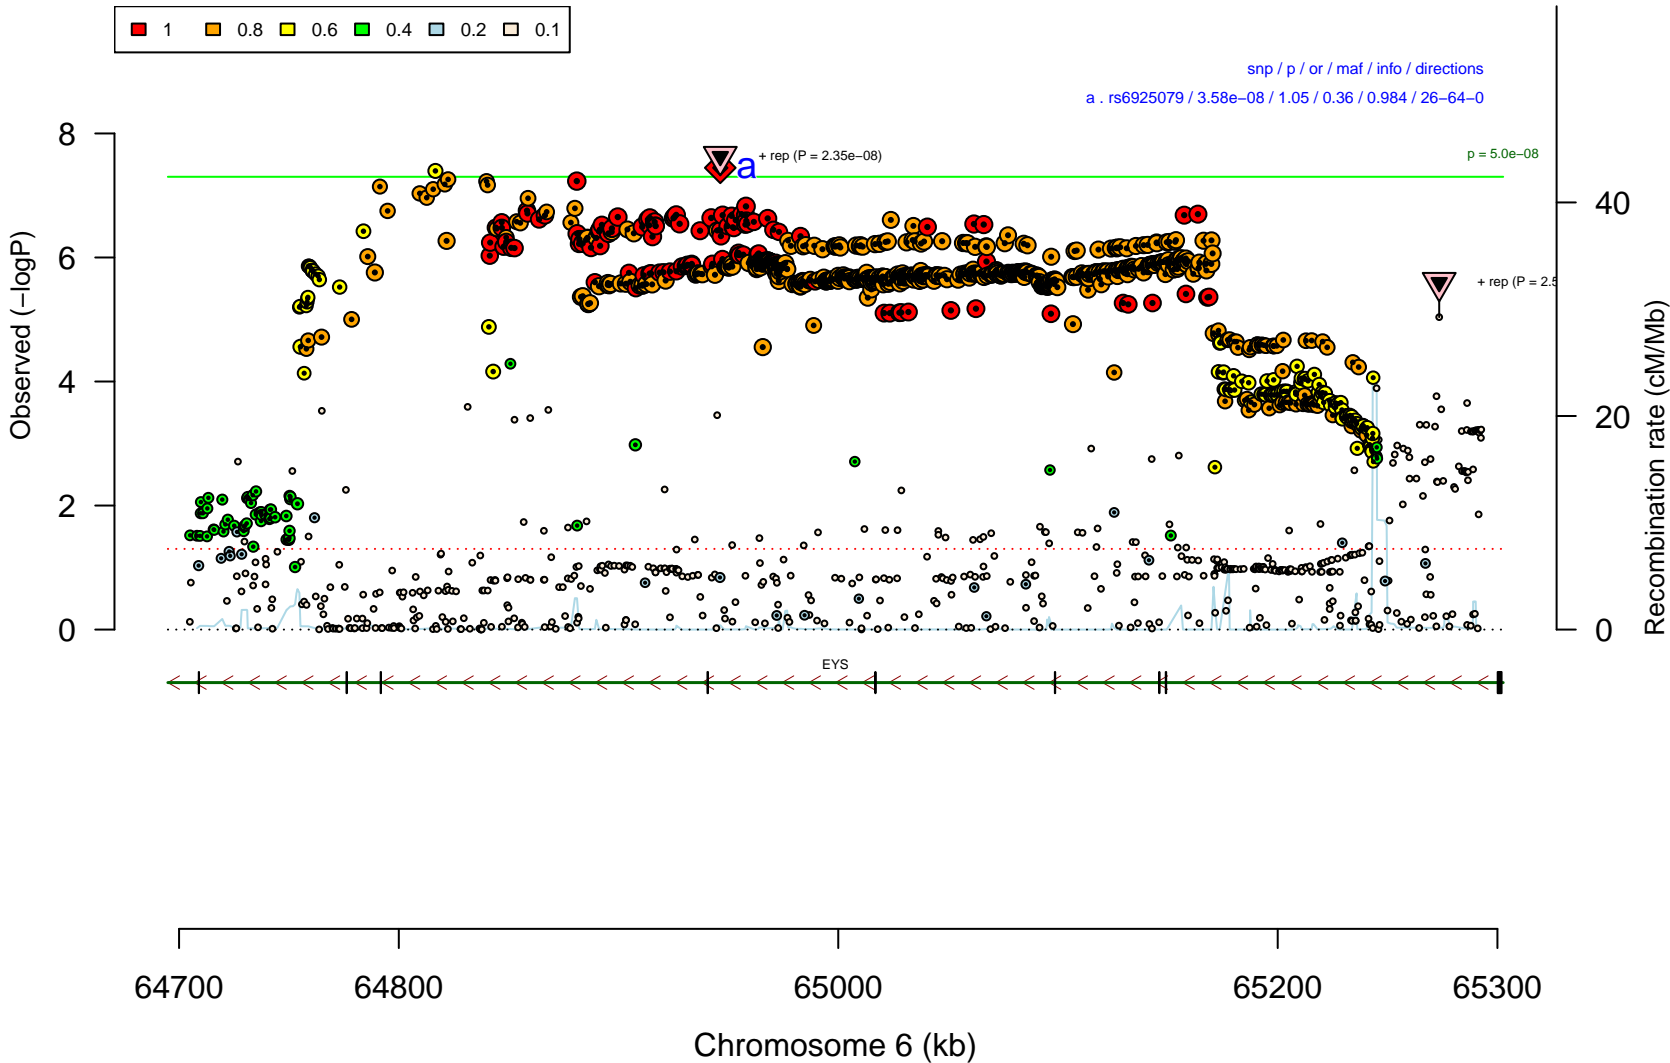

# PGC\_SCZ\_w3\_90\_0418b.8.chr1

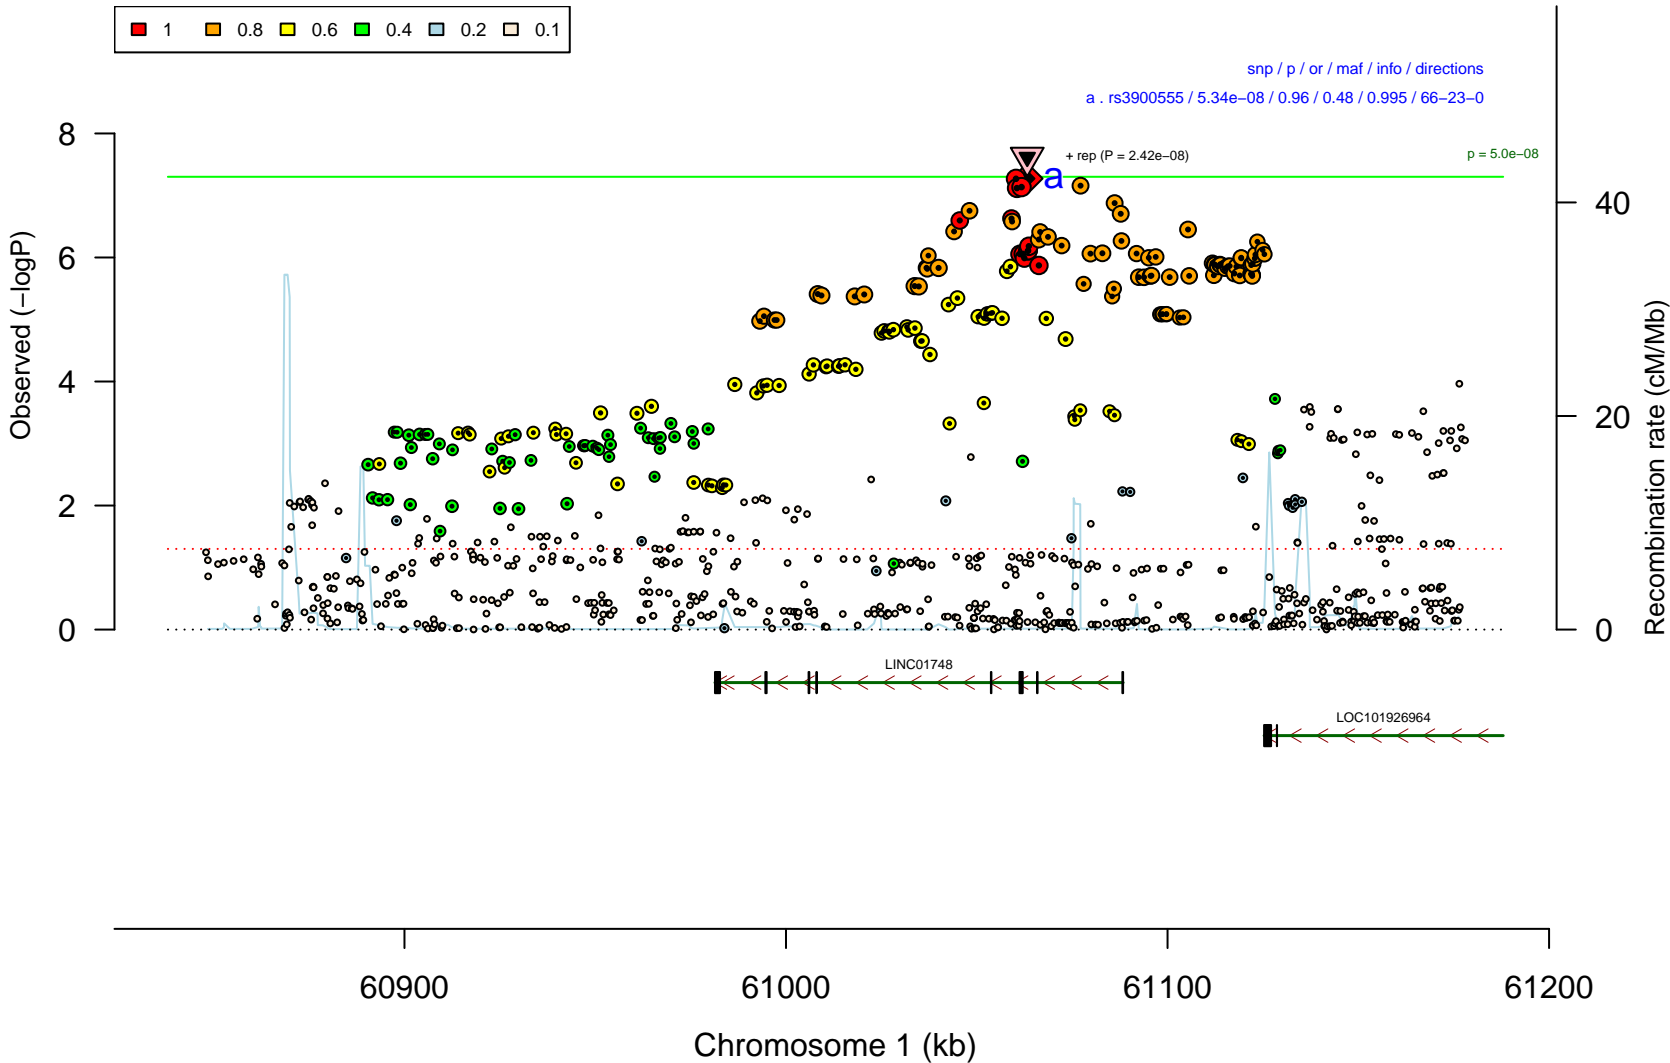

# PGC\_SCZ\_w3\_90\_0418b.4.chr1

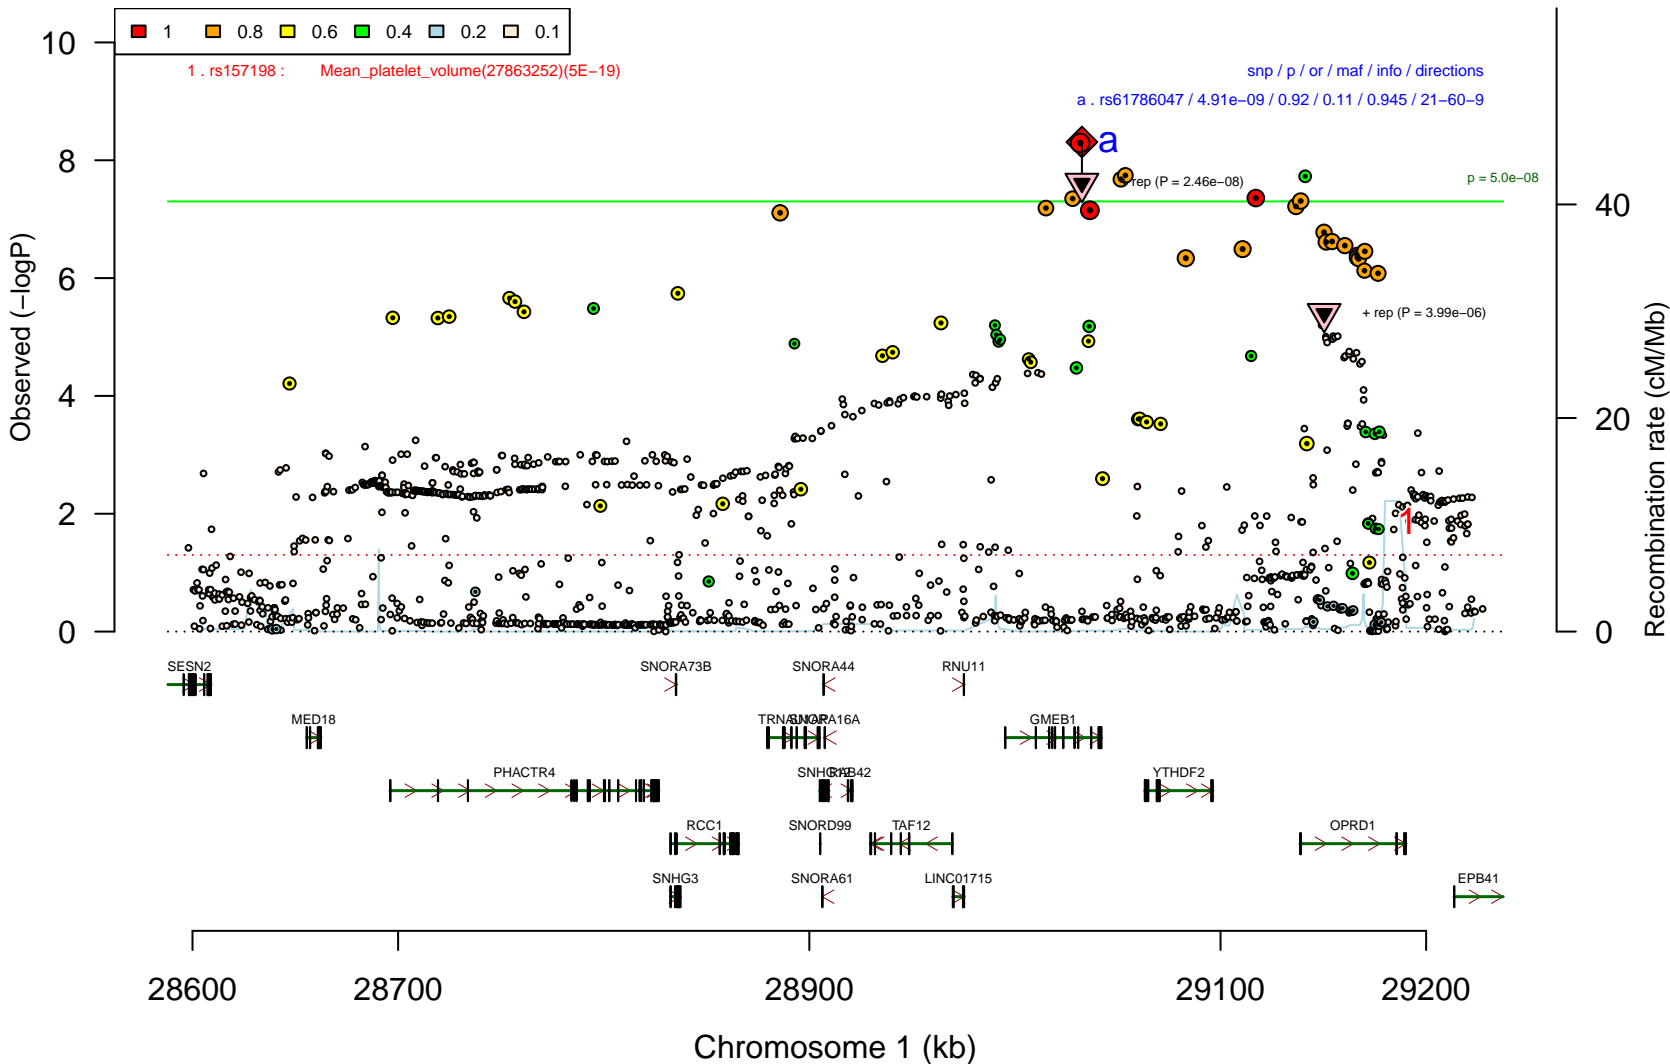

# PGC\_SCZ\_w3\_90\_0418b.157.chr9

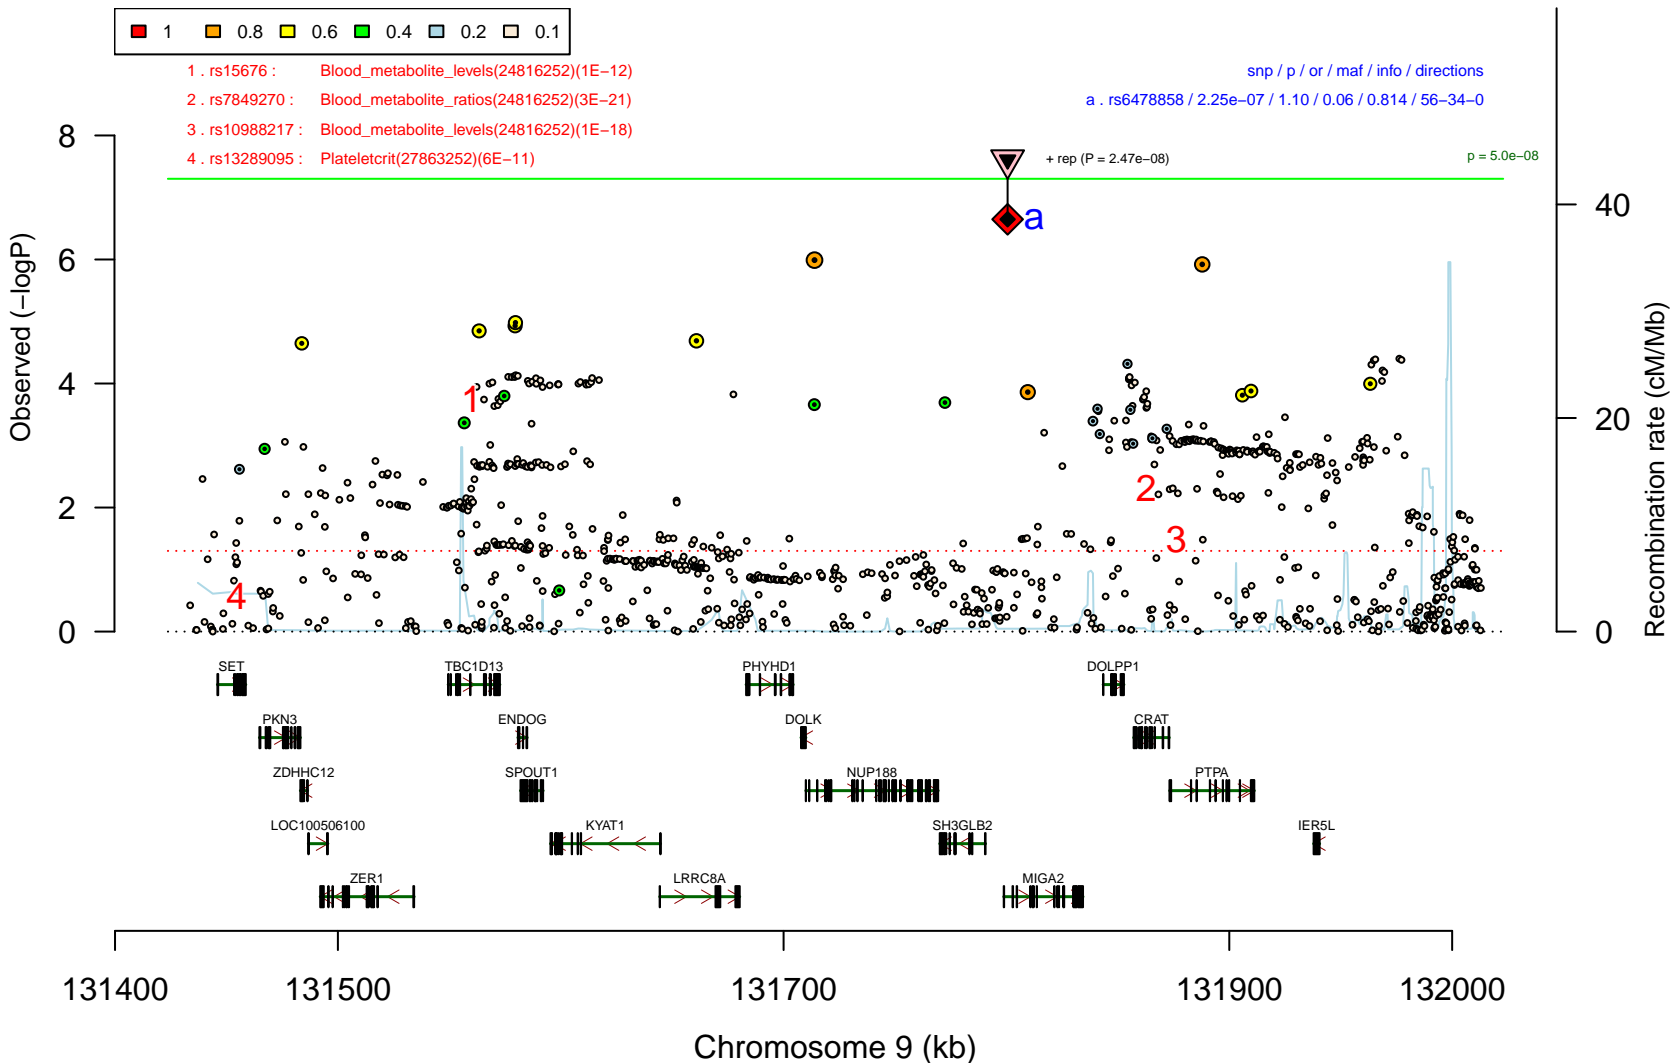

# PGC\_SCZ\_w3\_90\_0418b.117.chr7

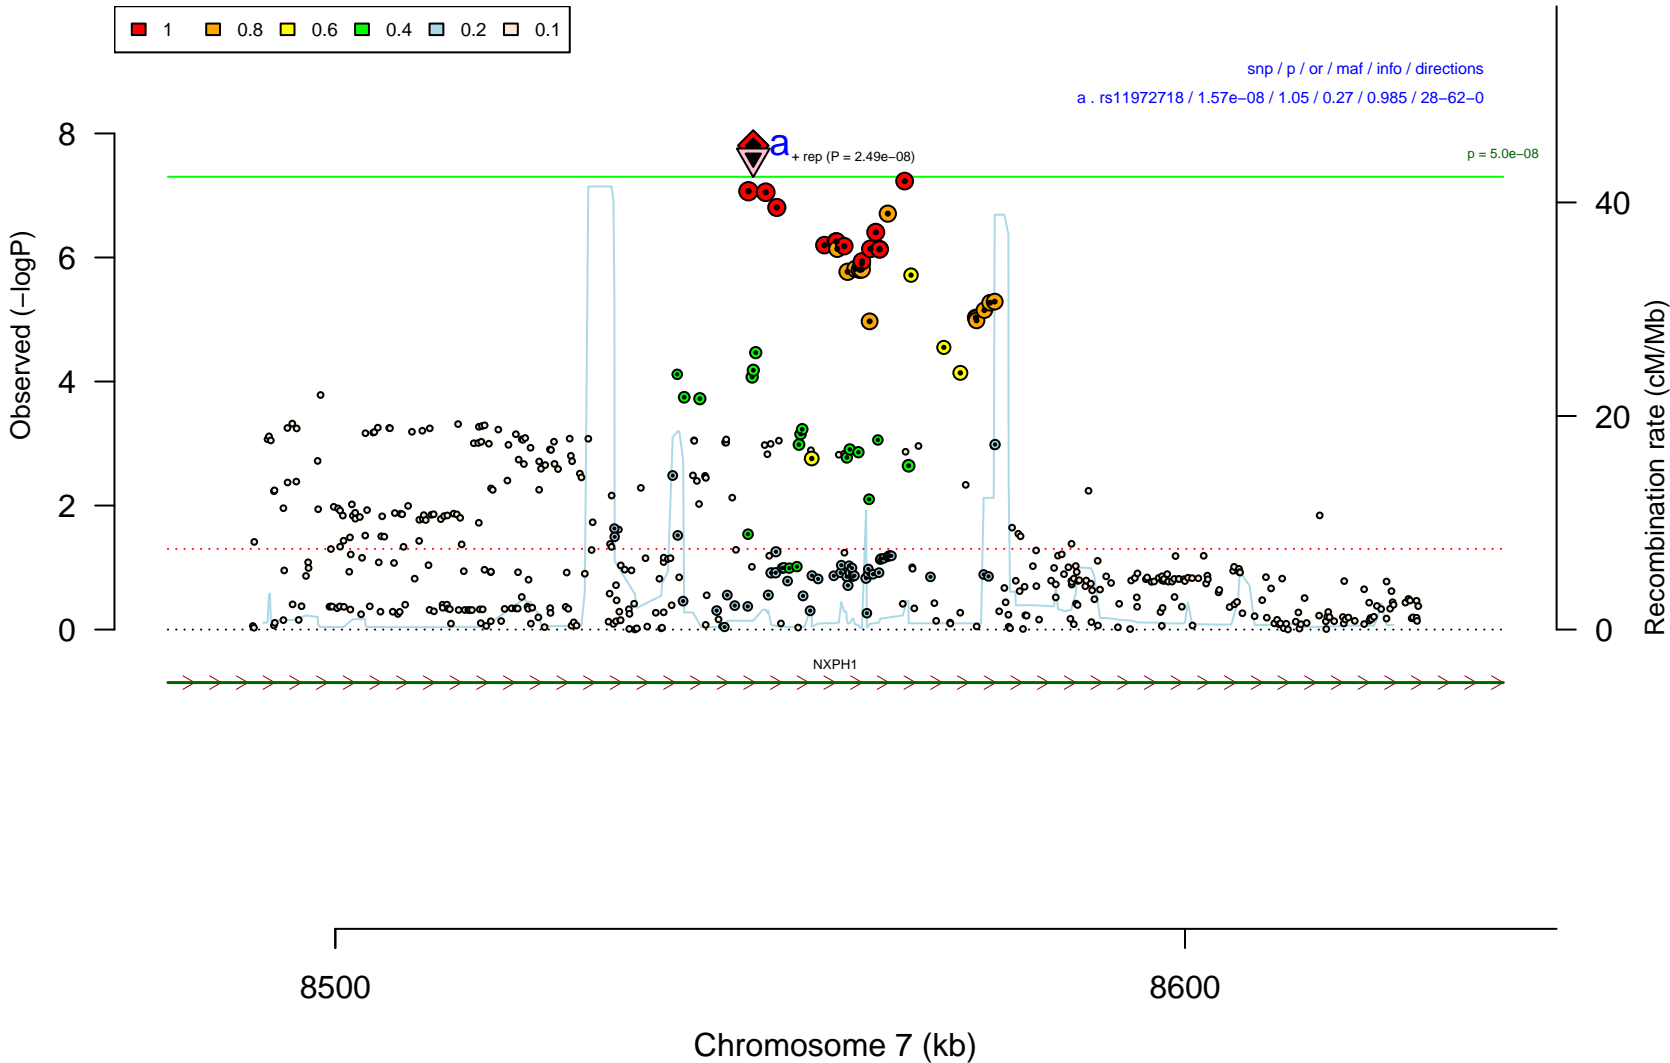

# PGC\_SCZ\_w3\_90\_0418b.24.chr1

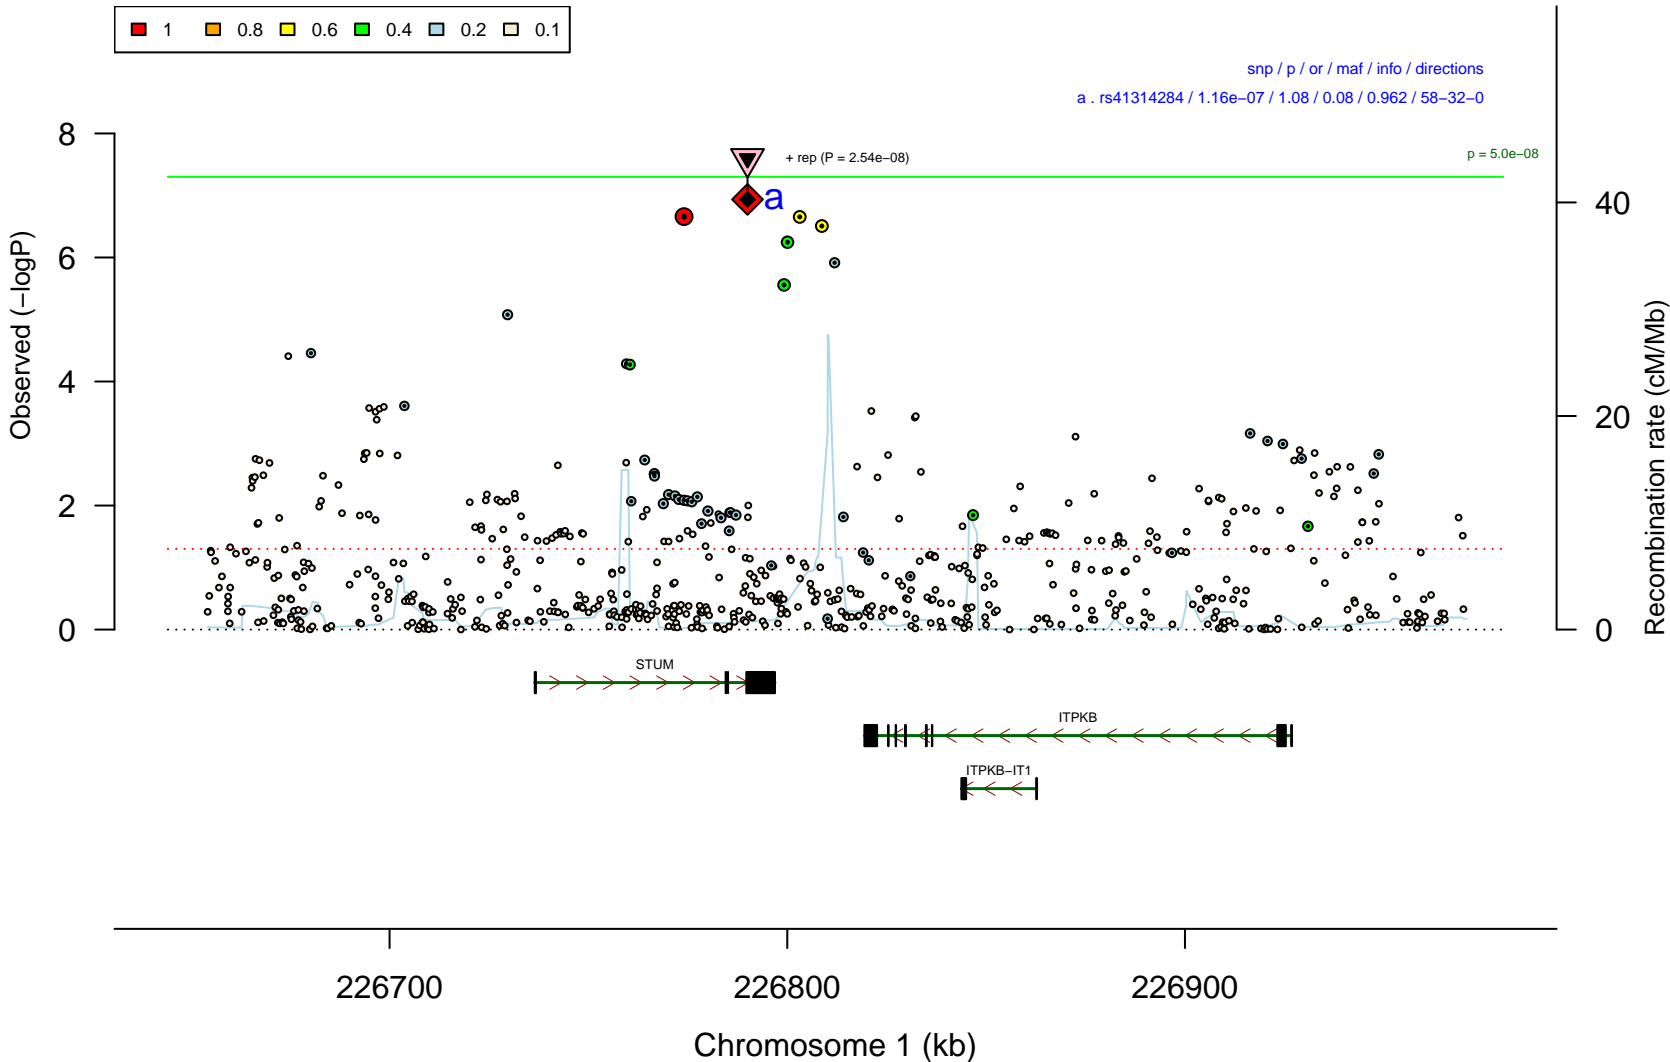

# PGC\_SCZ\_w3\_90\_0418b.104.chr6

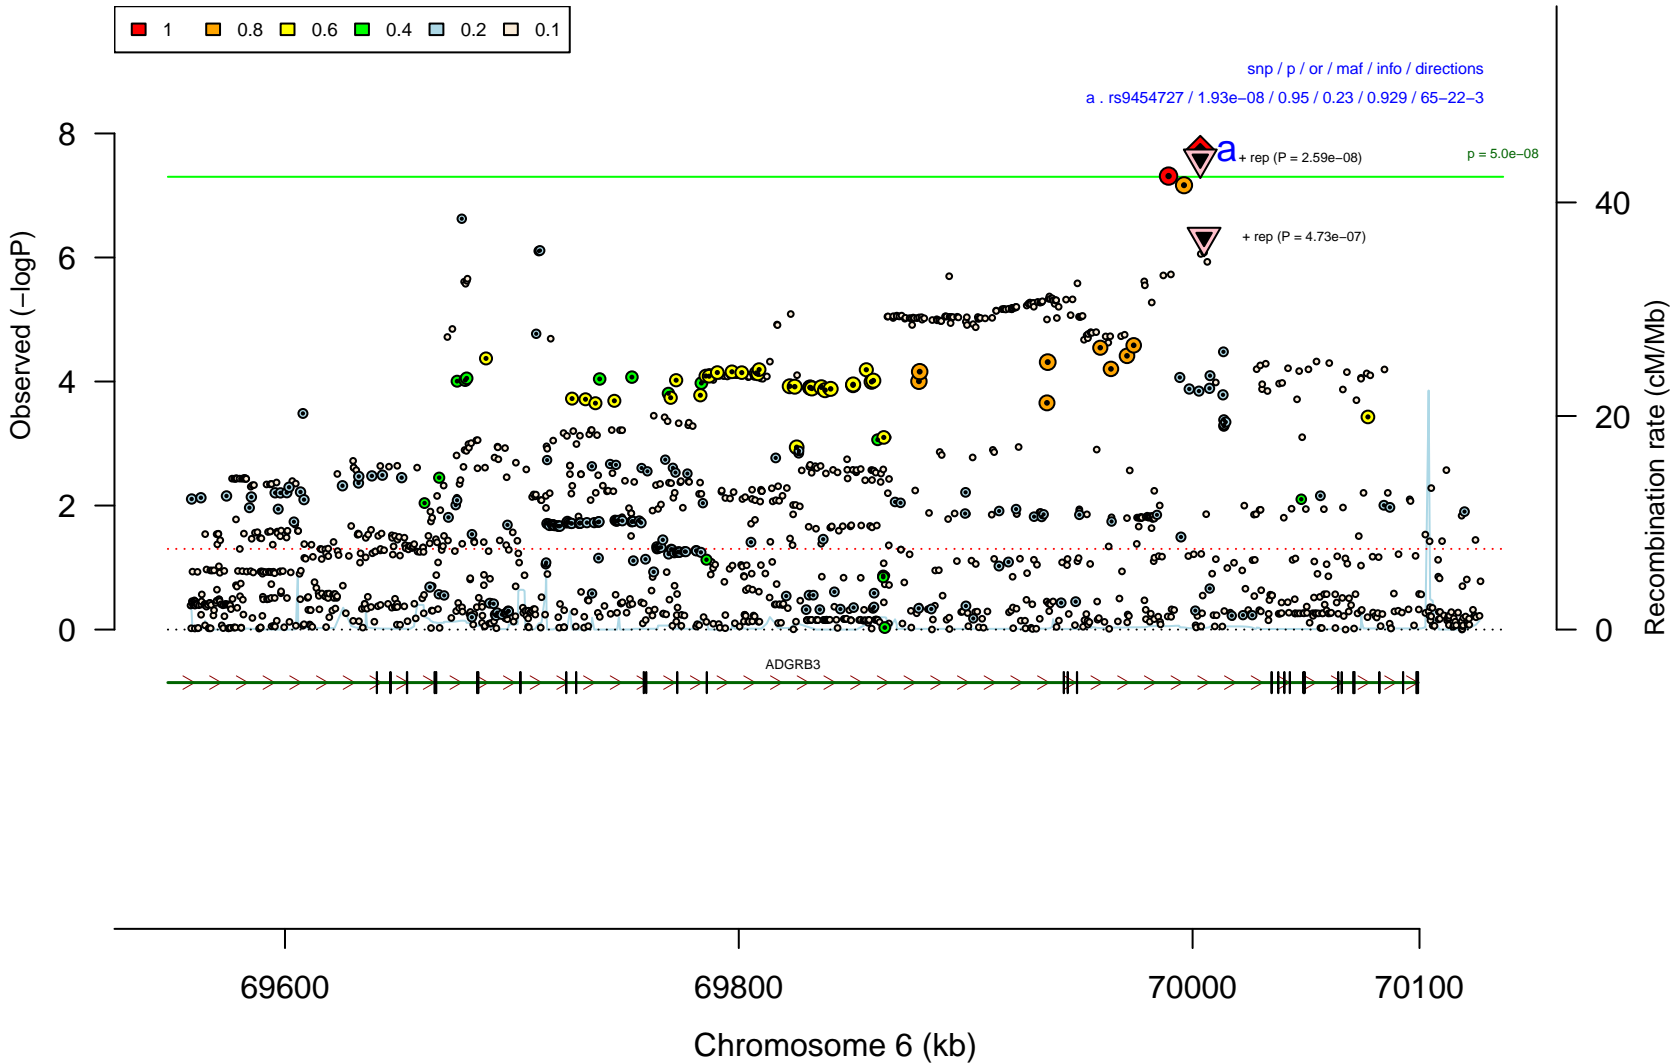



**PGC SCZ w3 90 0418b.189.chr12**

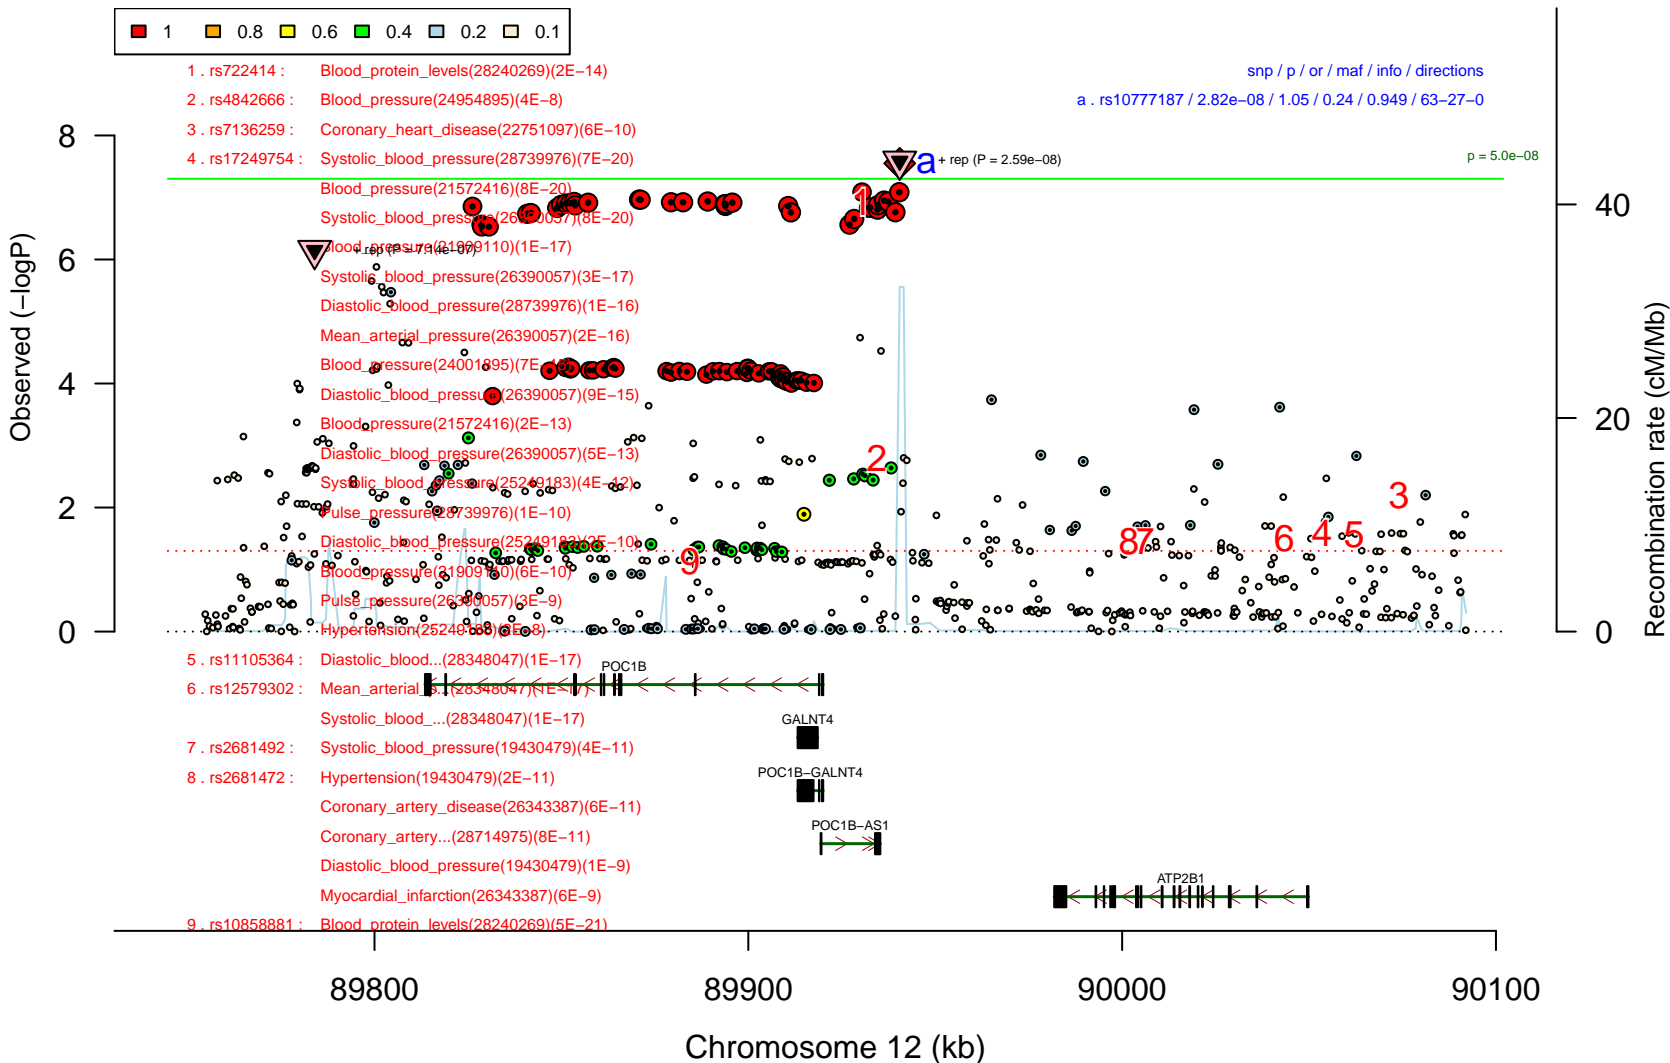

# PGC\_SCZ\_w3\_90\_0418b.193.chr12

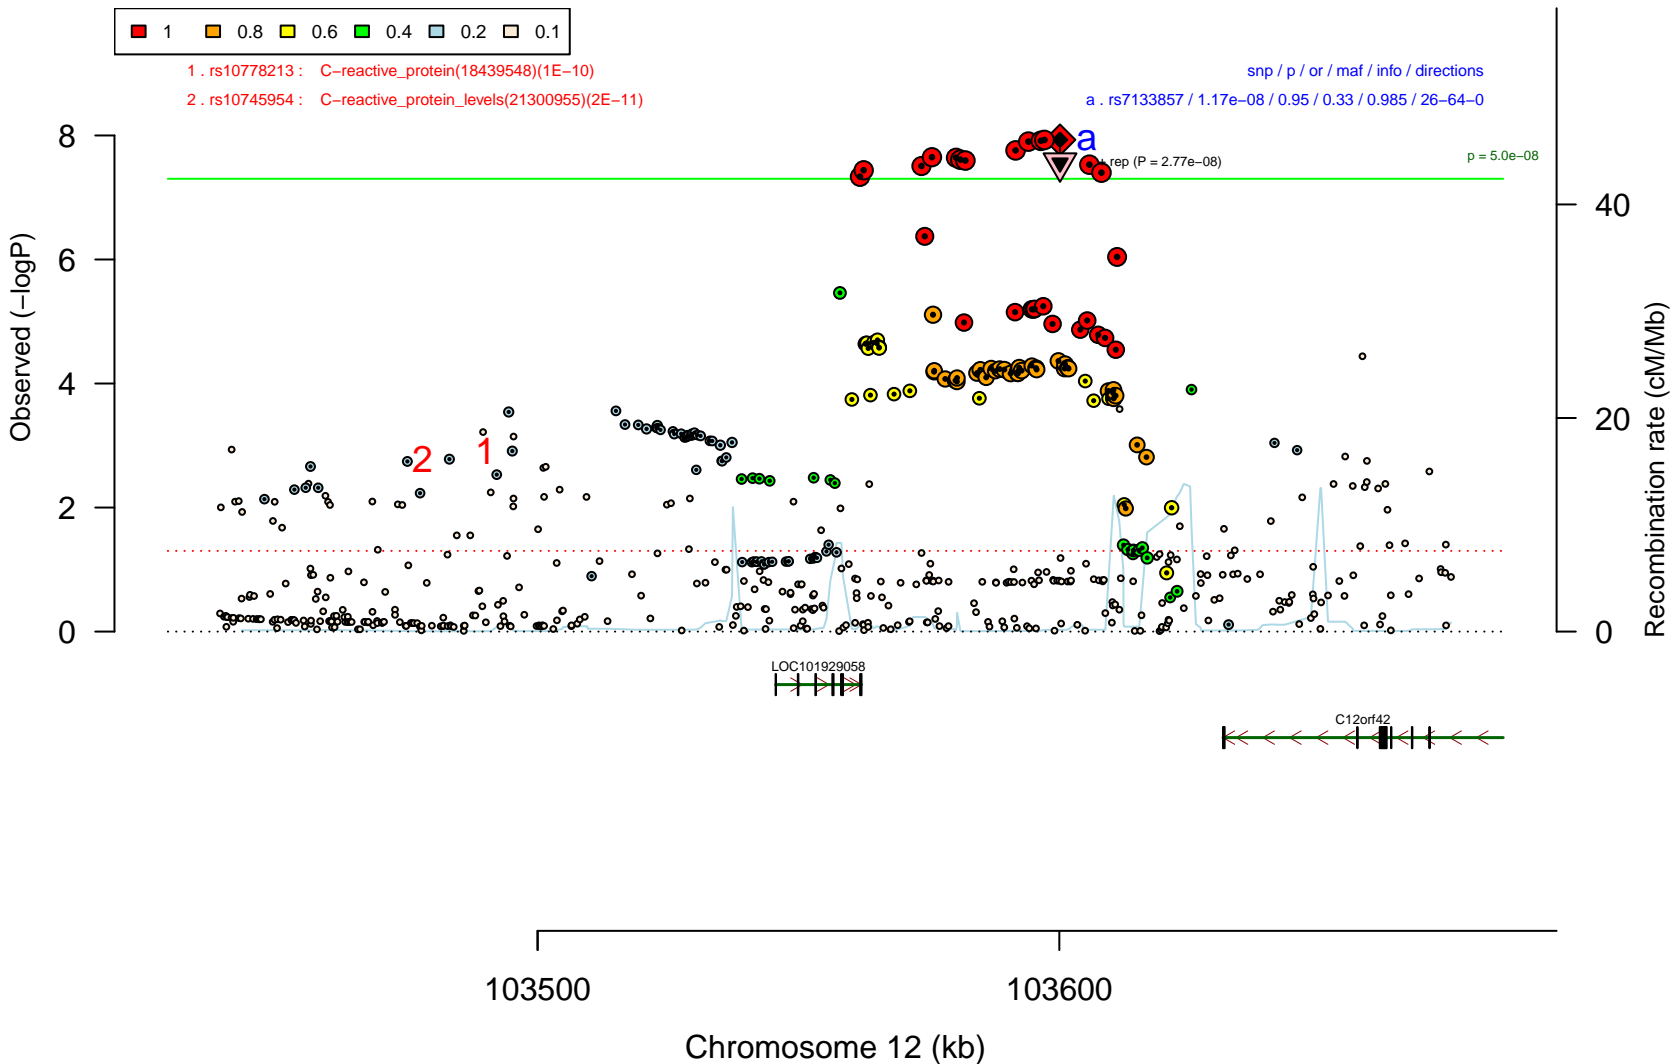

# PGC\_SCZ\_w3\_90\_0418b.23.chr1

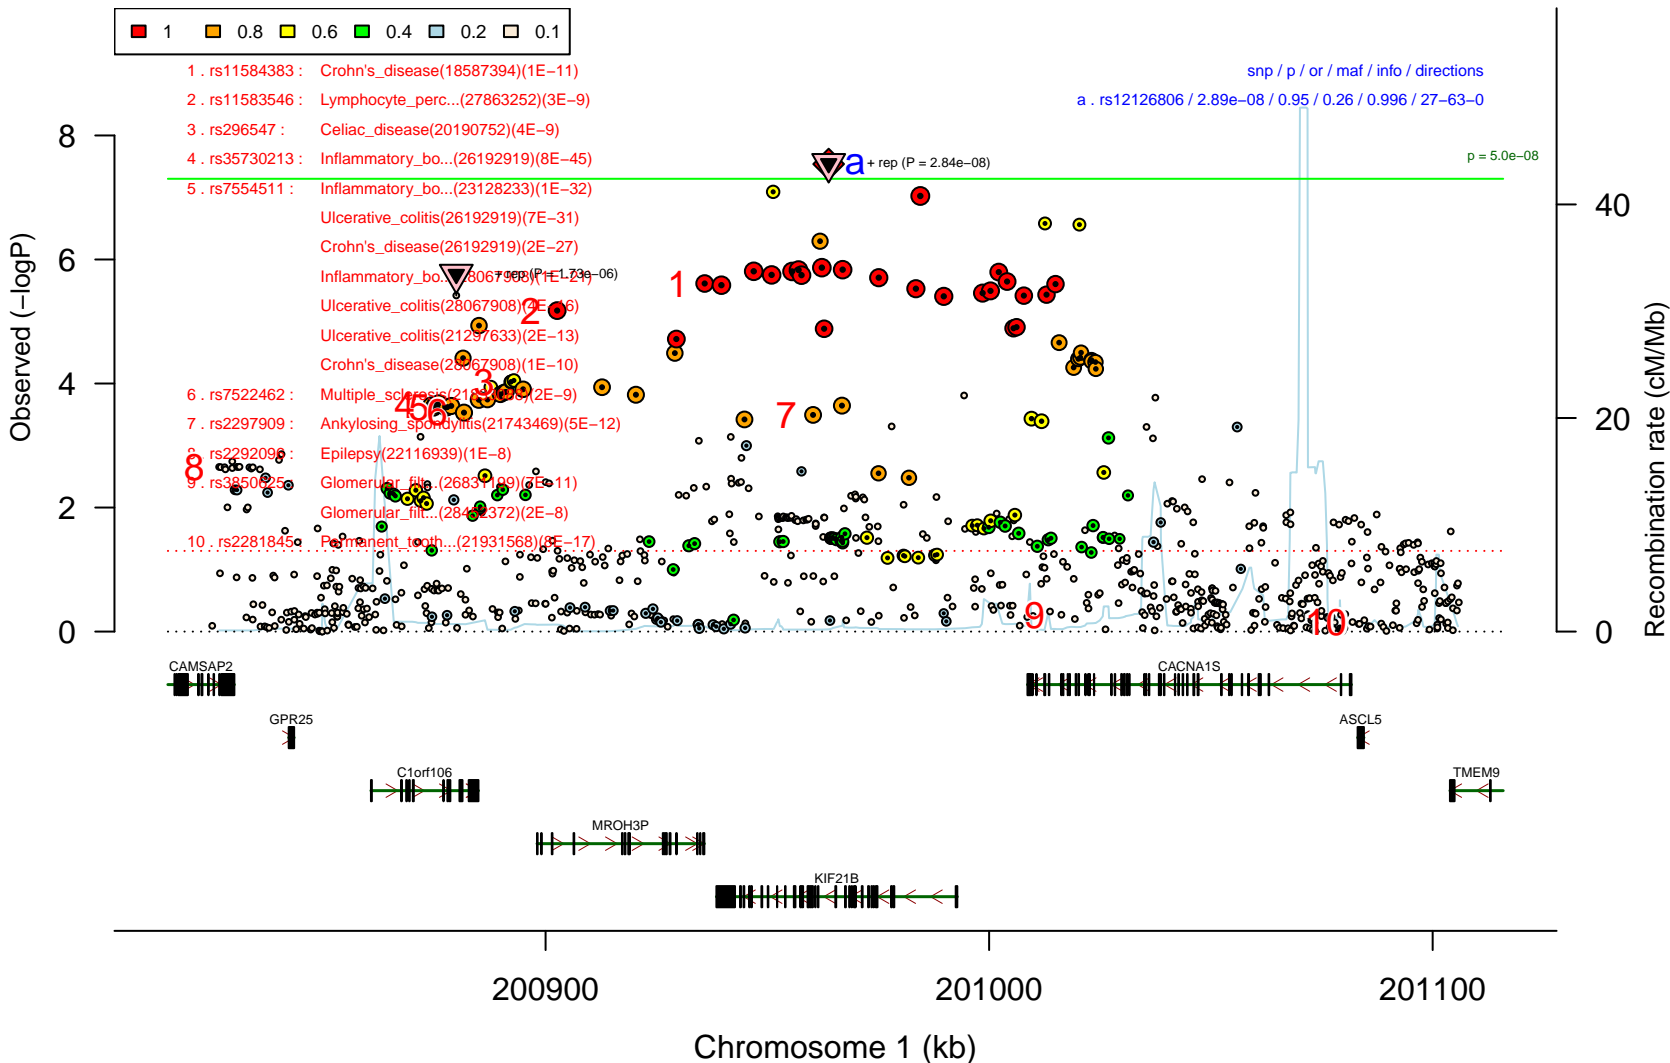

# PGC\_SCZ\_w3\_90\_0418b.108.chr6

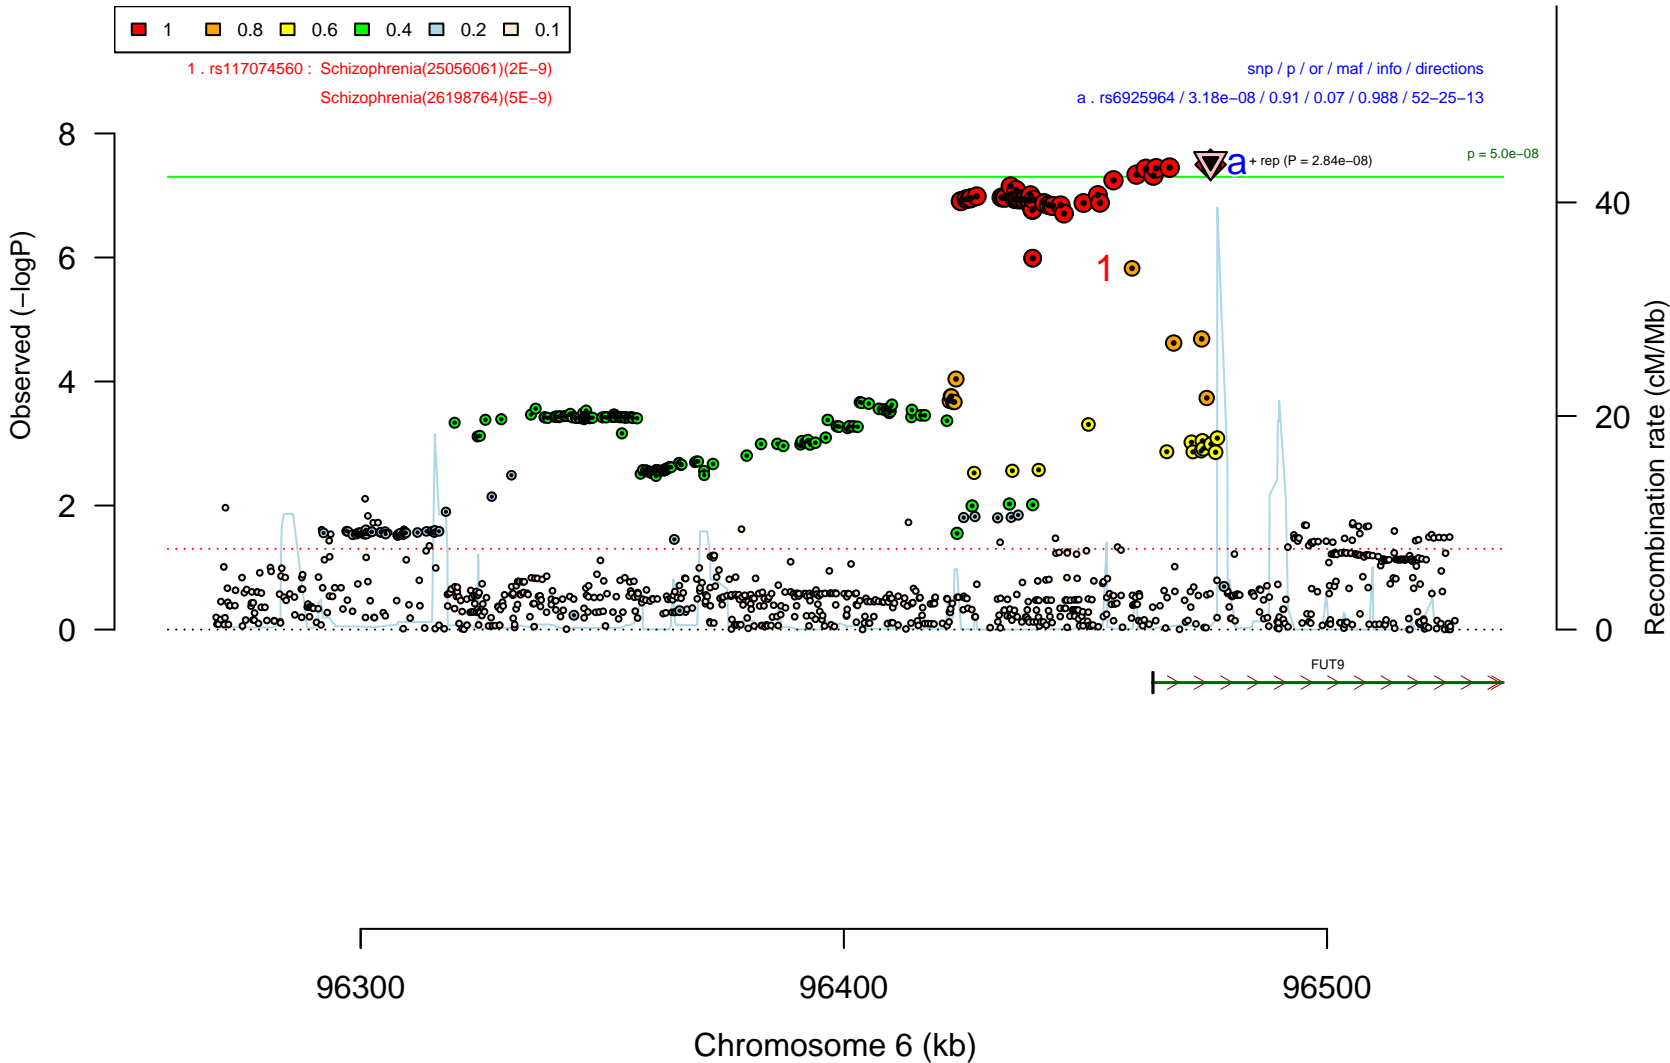

# PGC\_SCZ\_w3\_90\_0418b.33.chr2

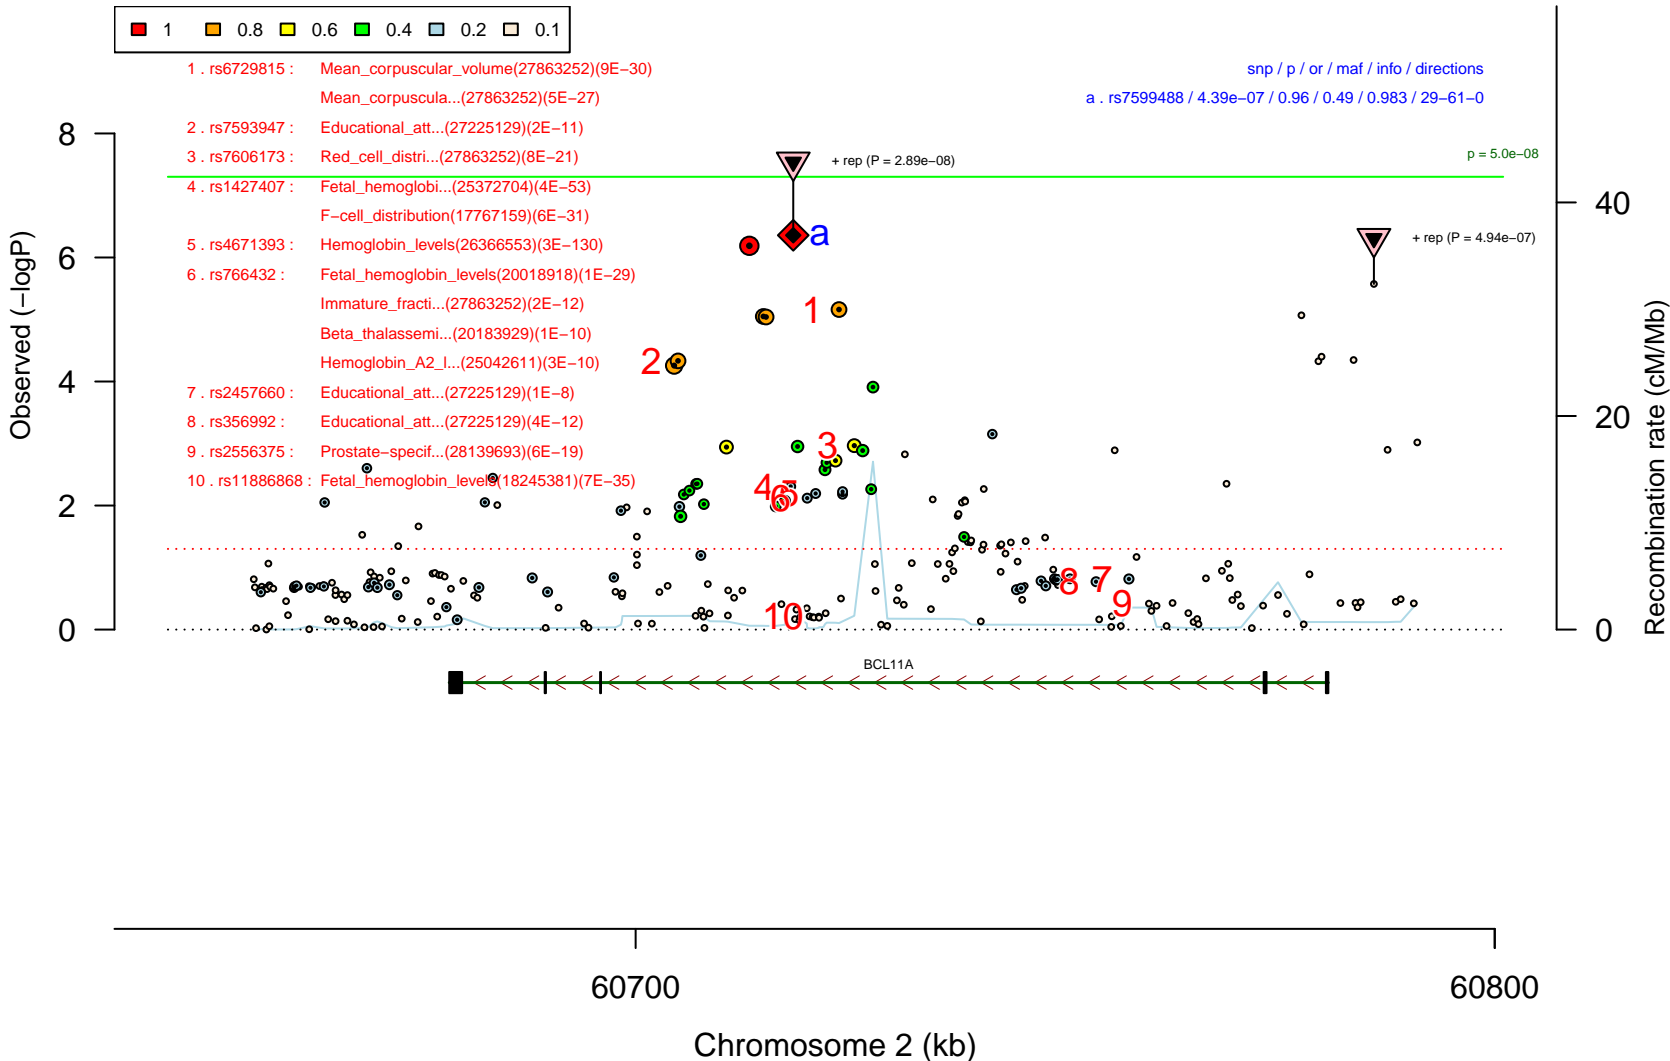

# PGC\_SCZ\_w3\_90\_0418b.37.chr2

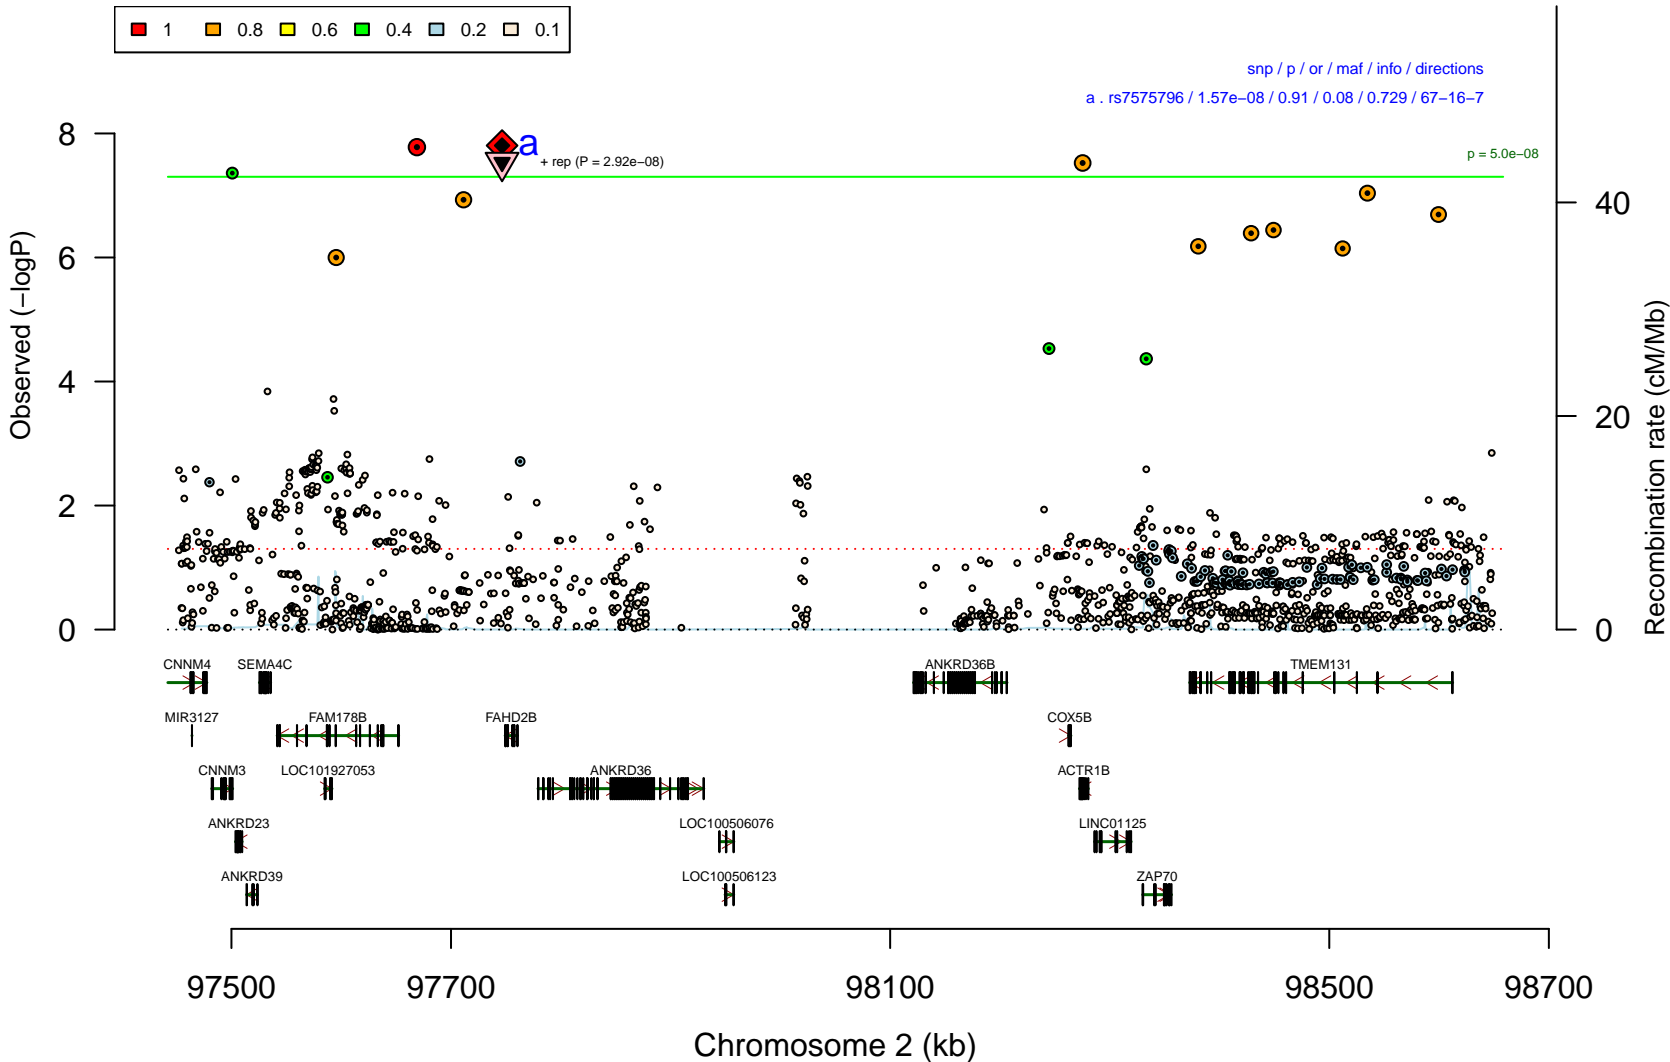

# PGC\_SCZ\_w3\_90\_0418b.228.chr16

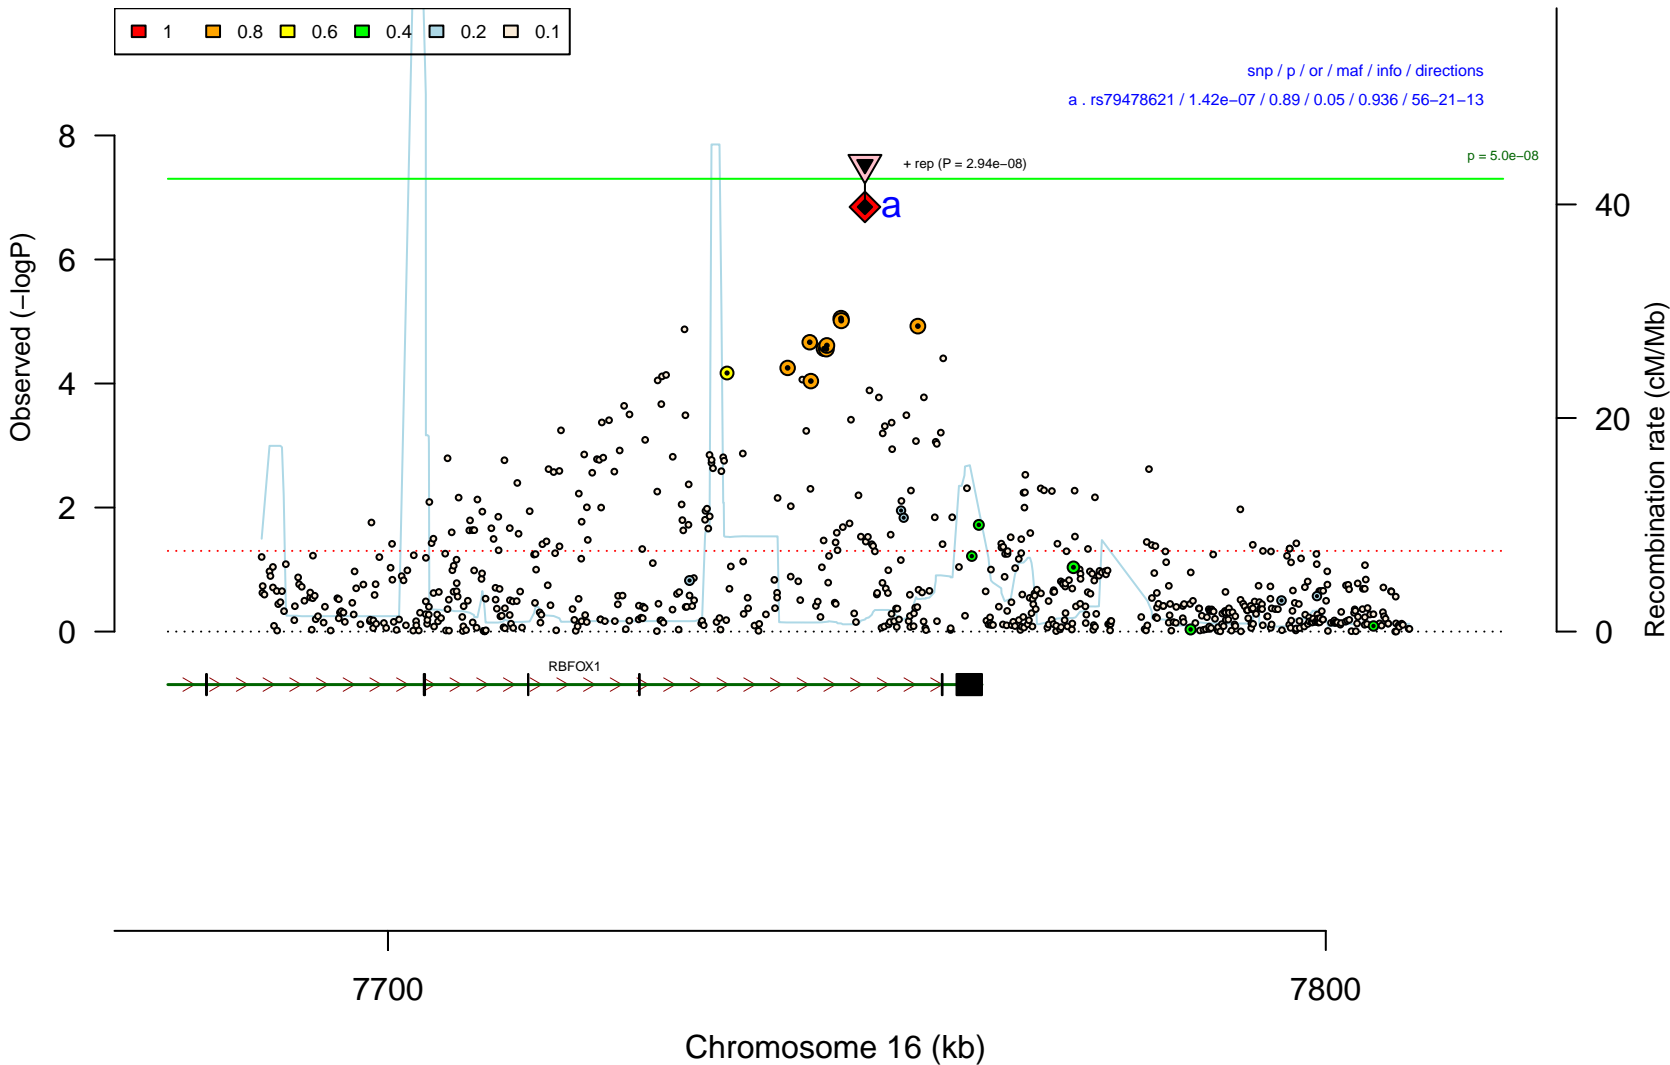

# PGC\_SCZ\_w3\_90\_0418b.62.chr3

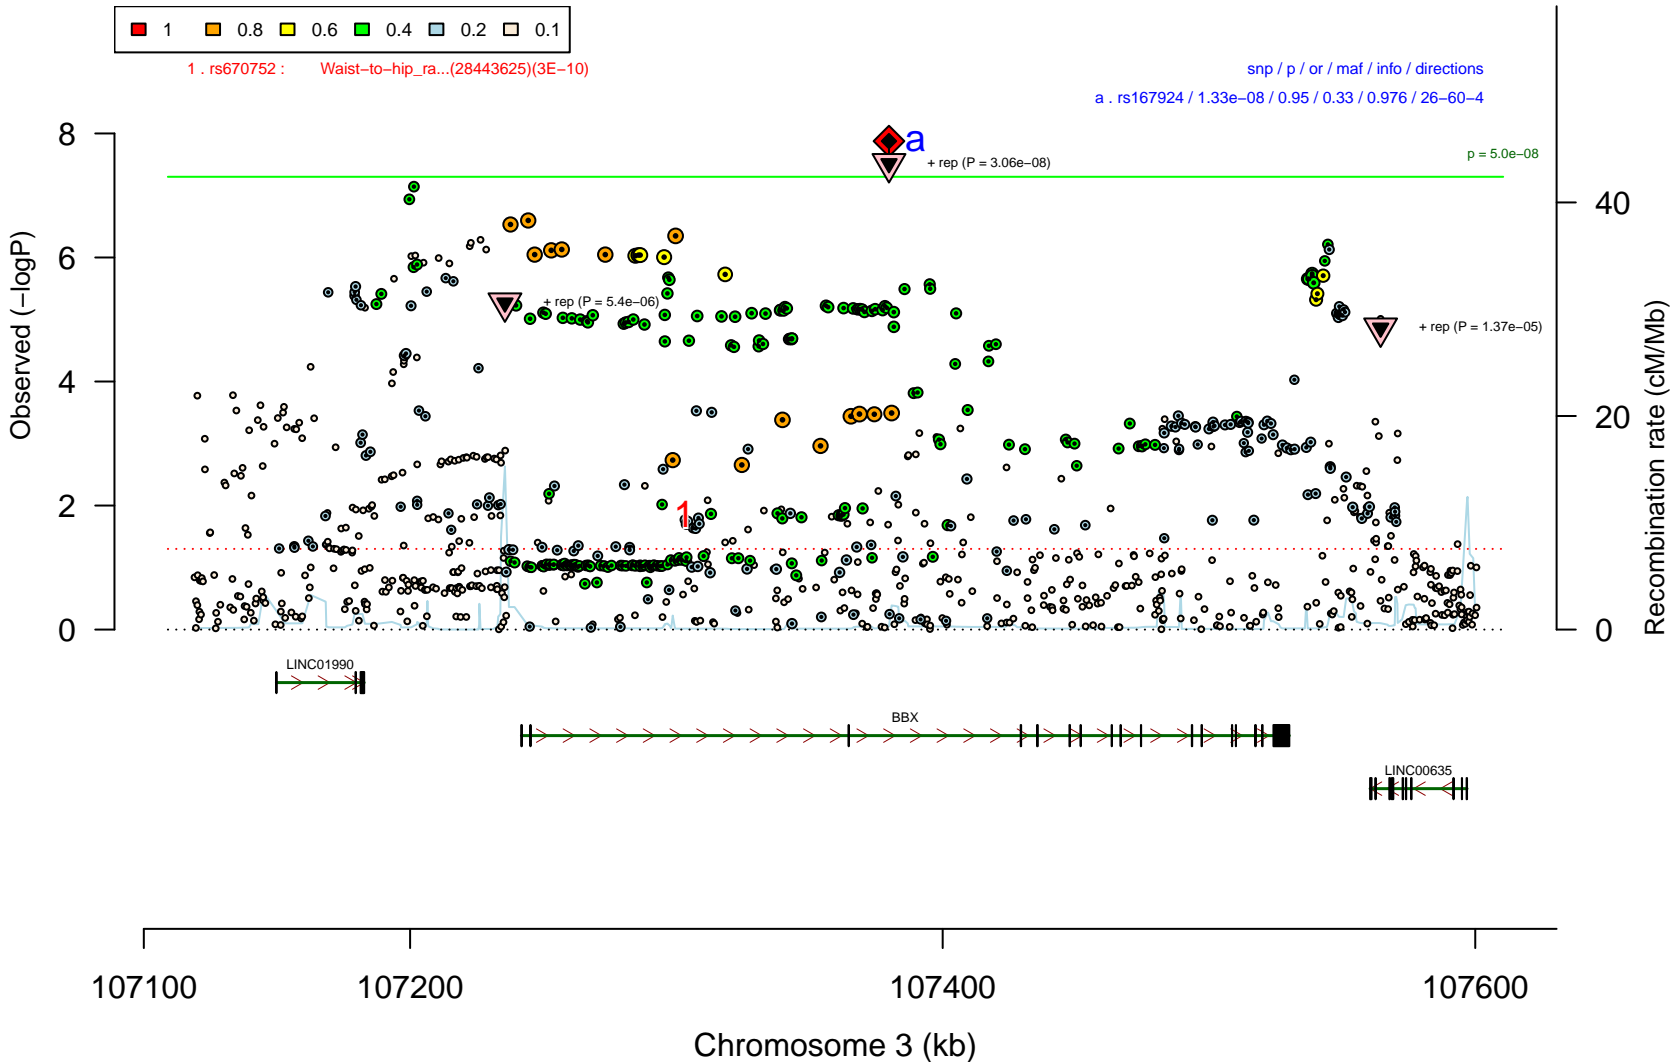



# PGC\_SCZ\_w3\_90\_0418b.135.chr8

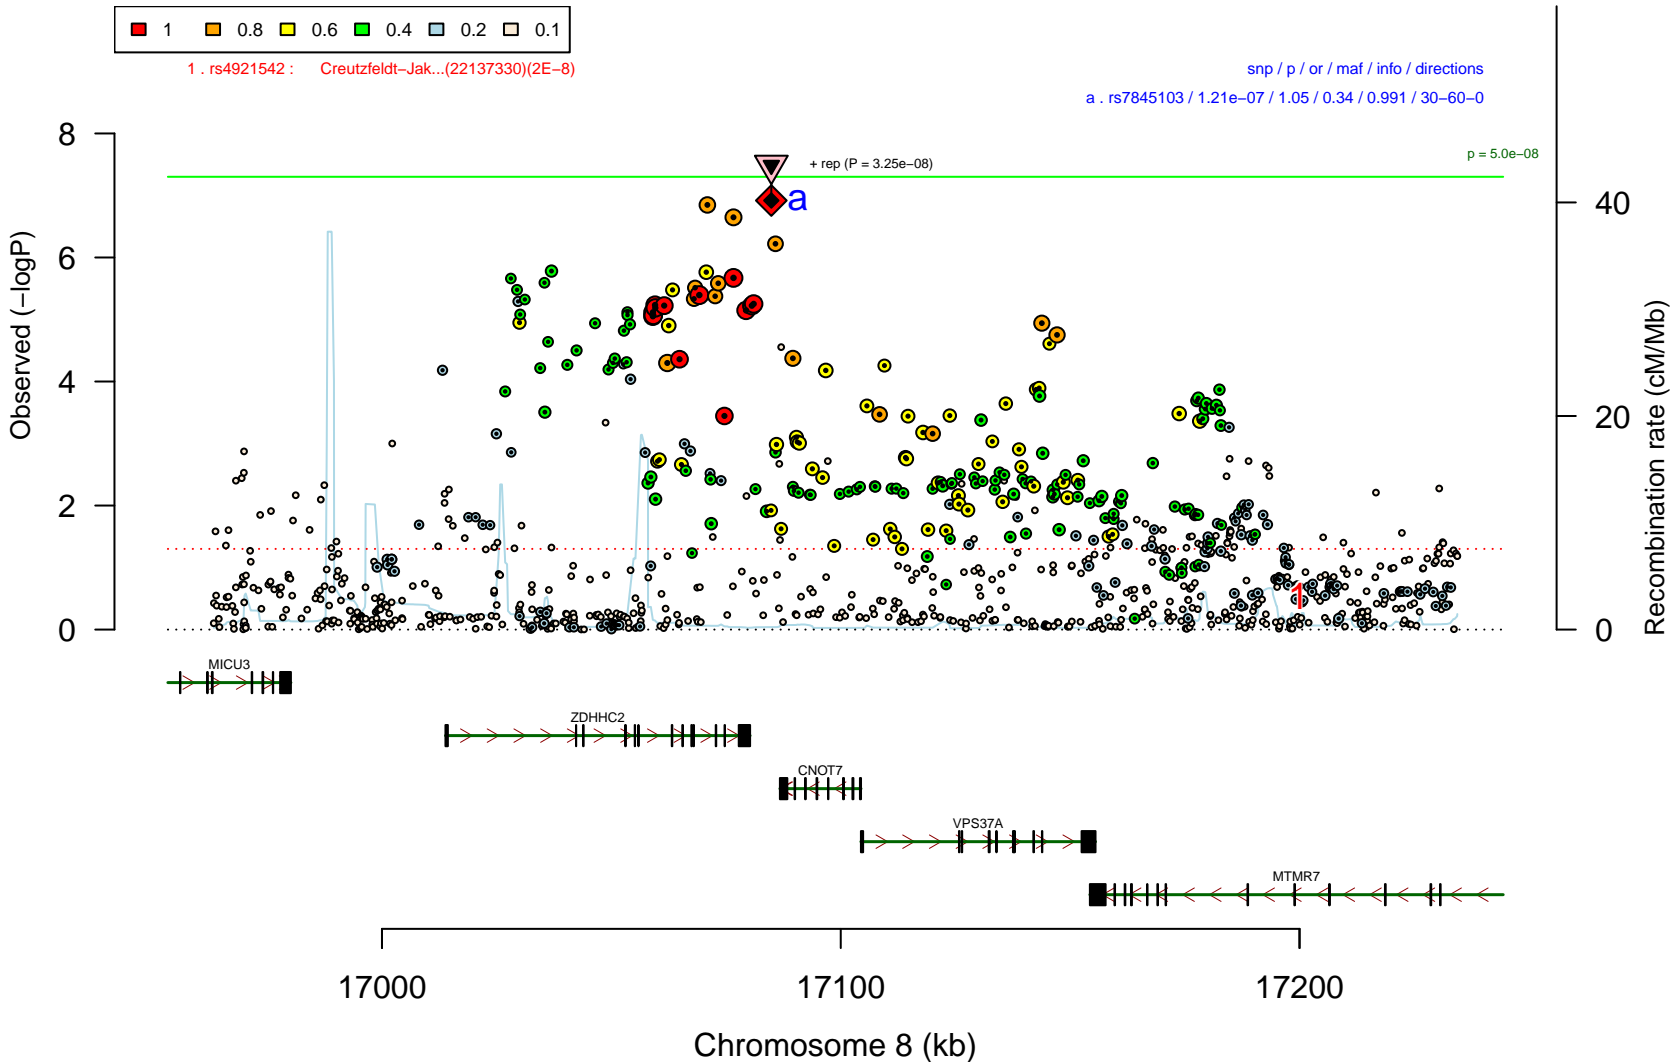

# PGC\_SCZ\_w3\_90\_0418b.192.chr12

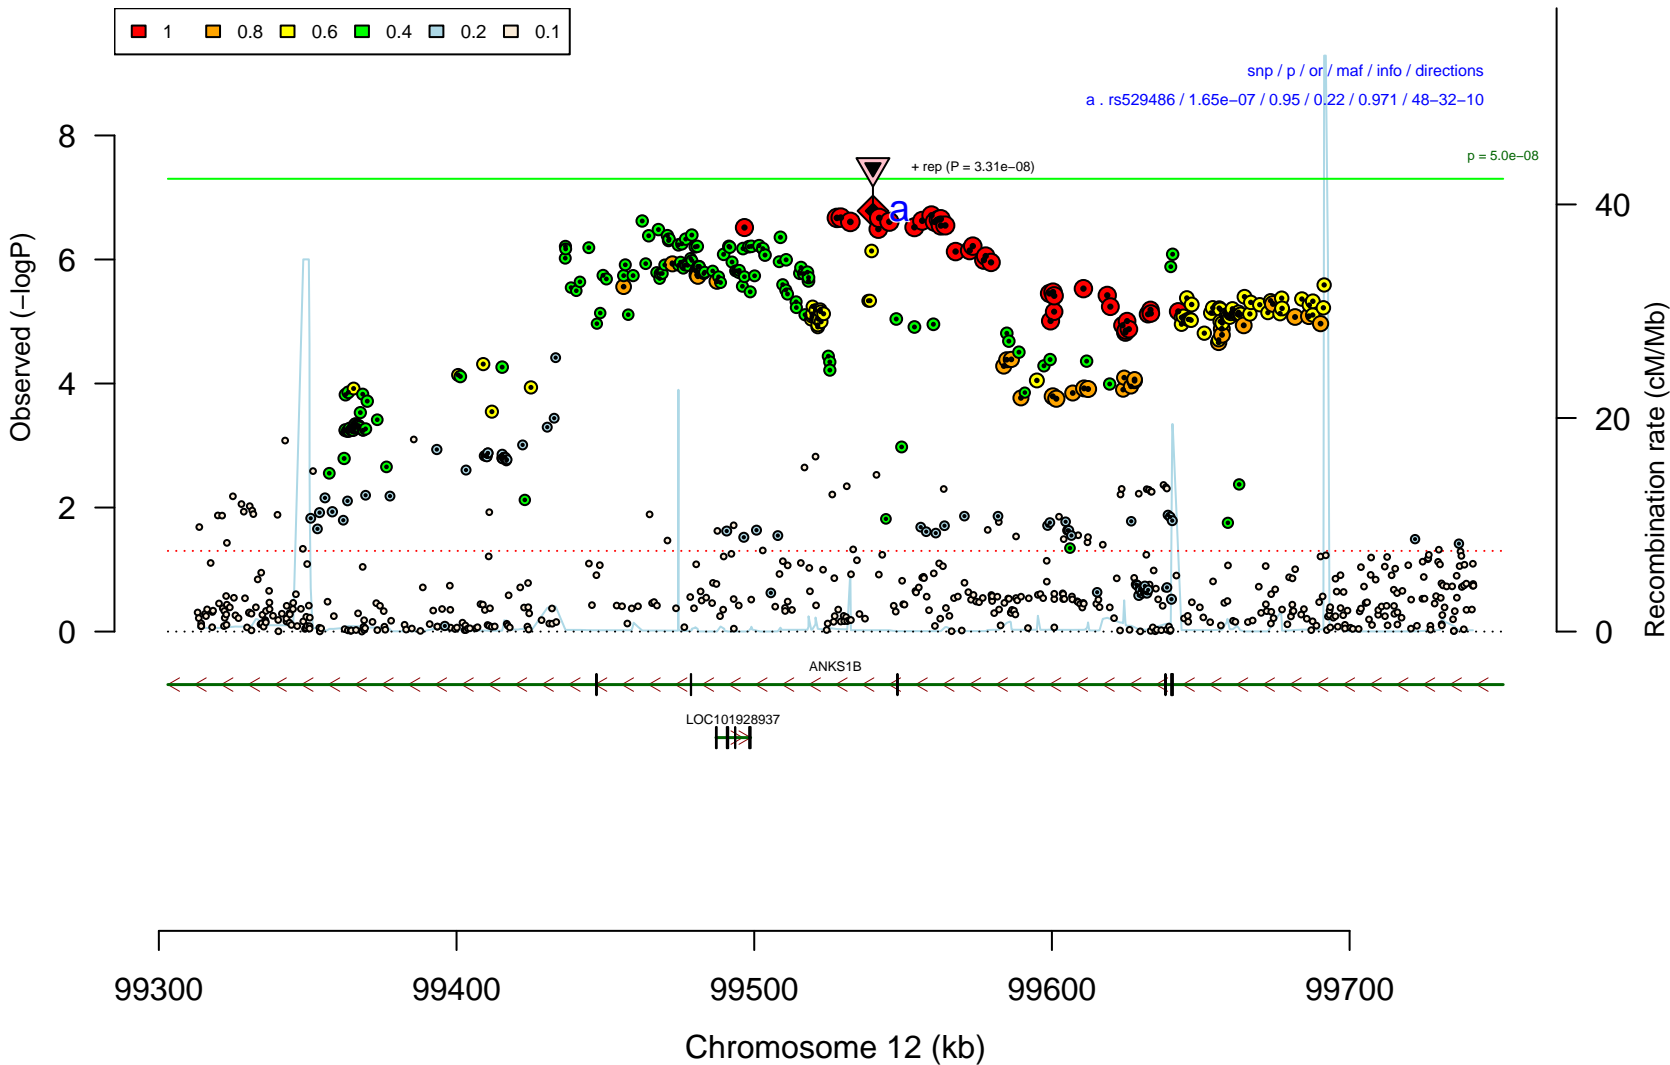

# PGC\_SCZ\_w3\_90\_0418b.232.chr16

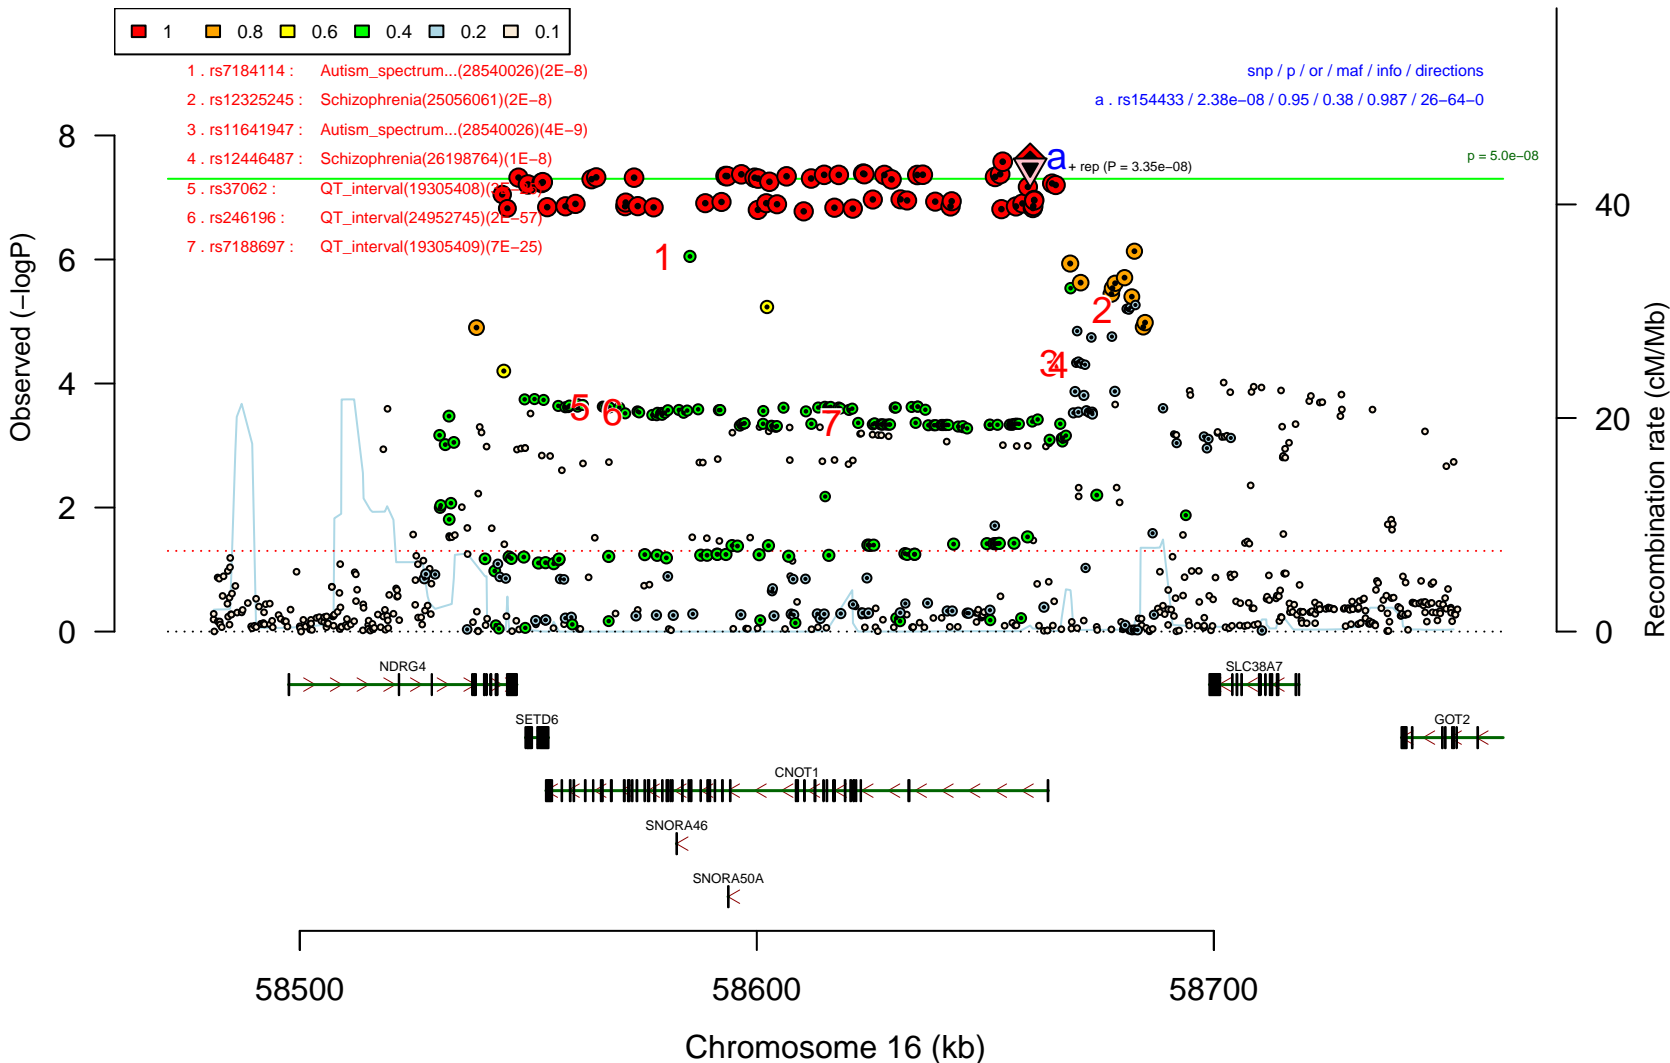

# PGC\_SCZ\_w3\_90\_0418b.77.chr4

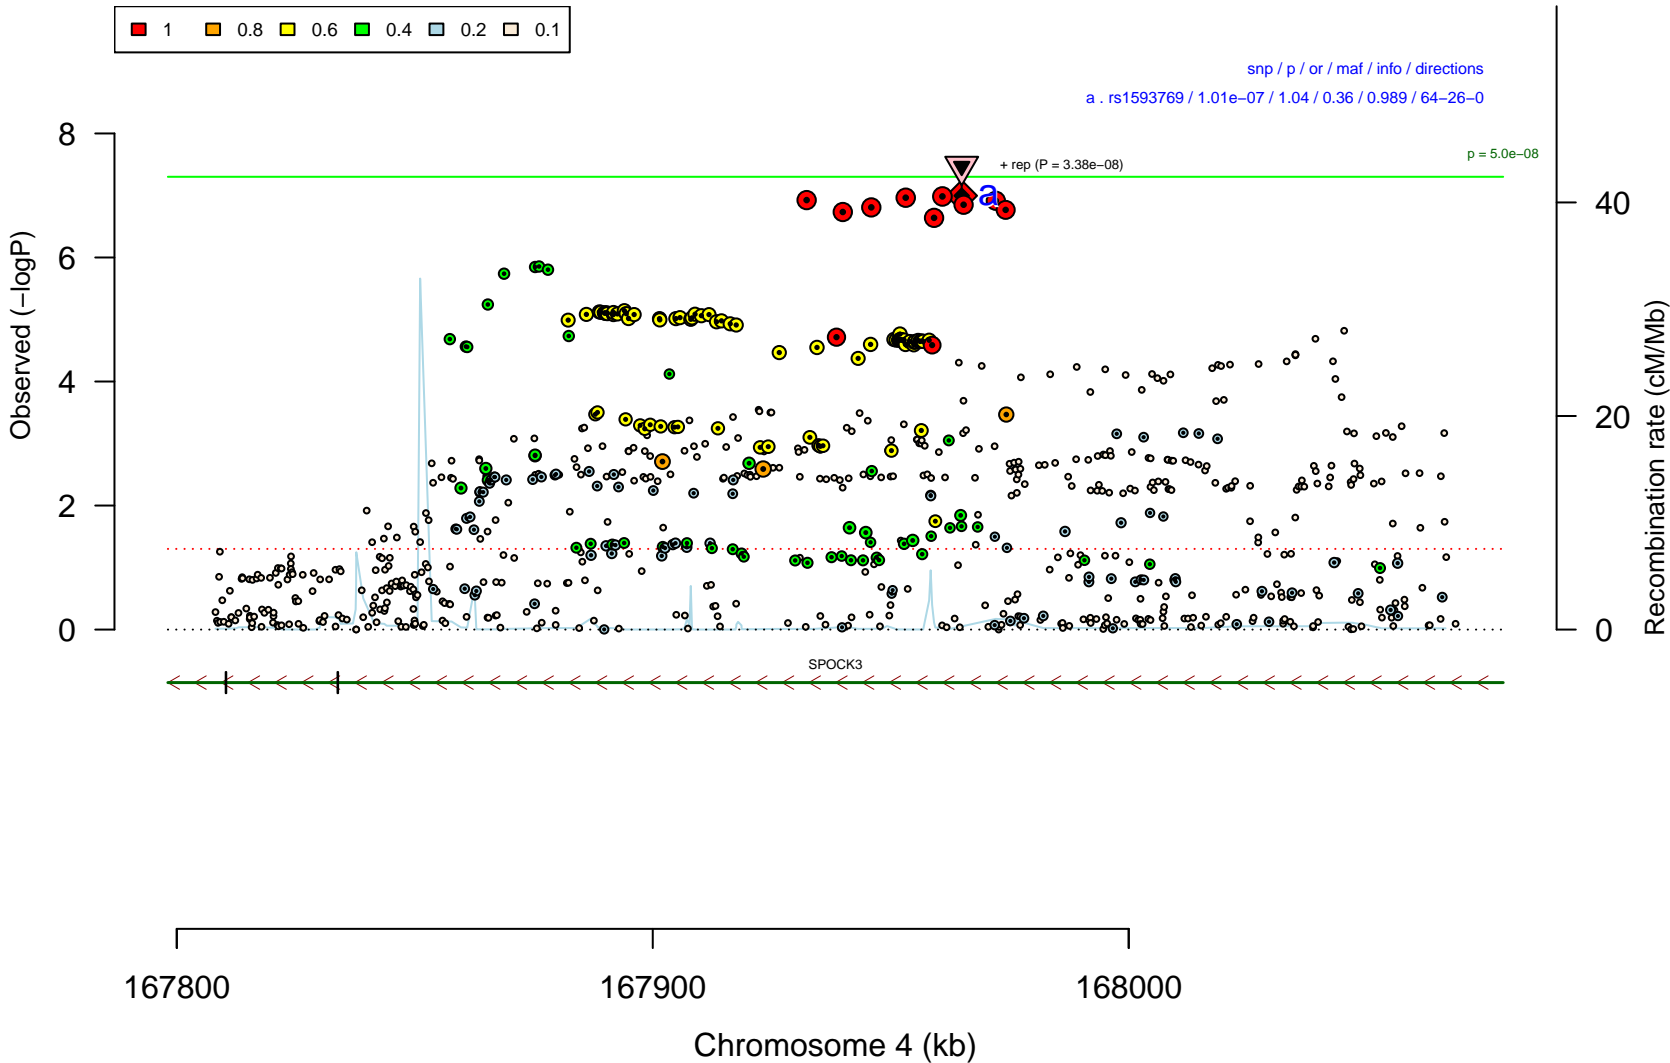

# PGC\_SCZ\_w3\_90\_0418b.136.chr8

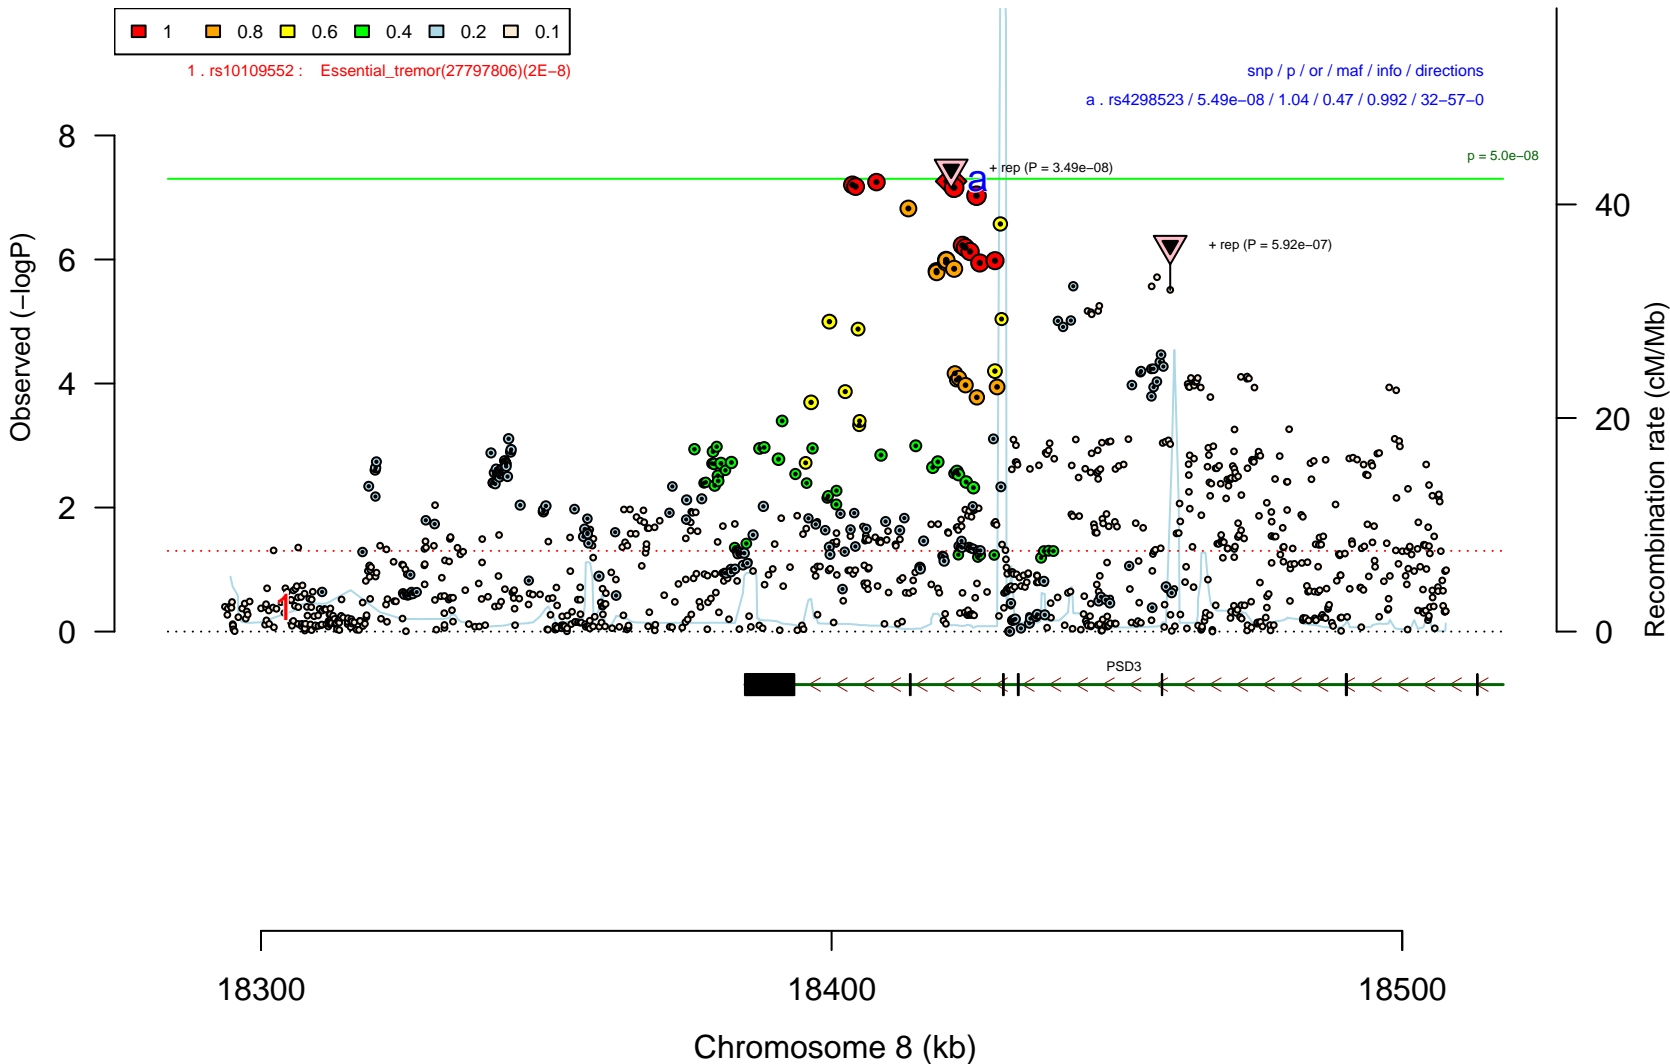

# PGC\_SCZ\_w3\_90\_0418b.111.chr6

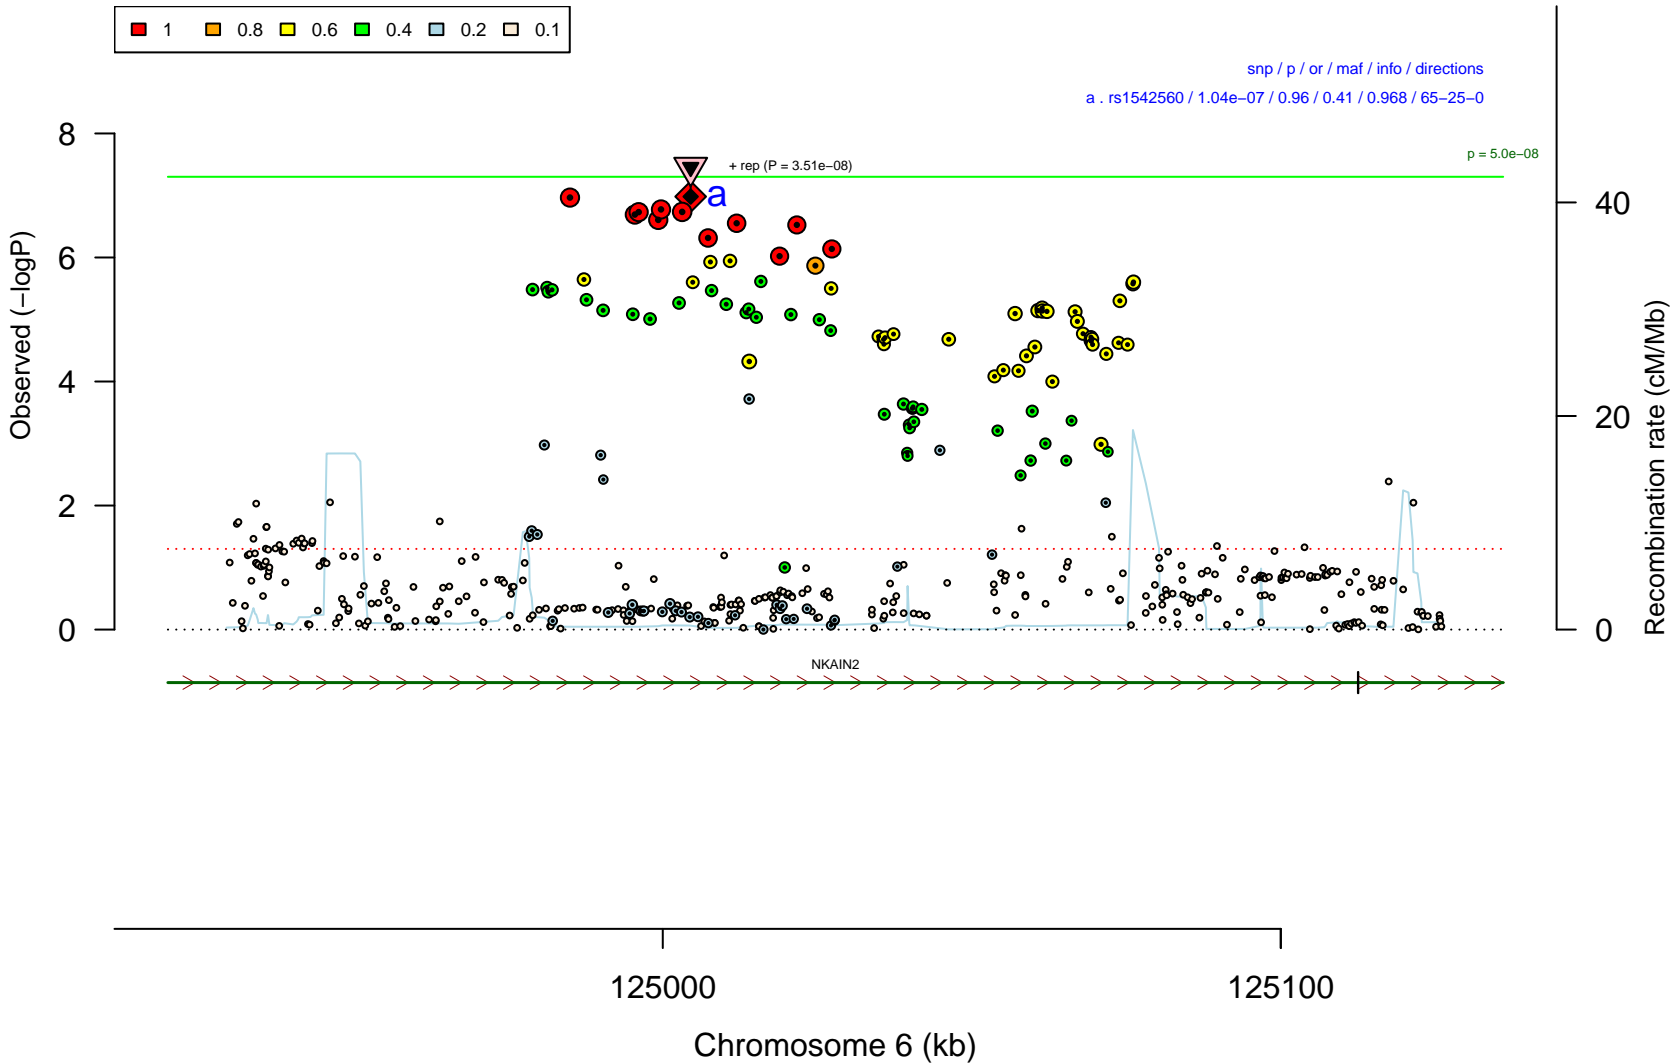

# PGC\_SCZ\_w3\_90\_0418b.16.chr1

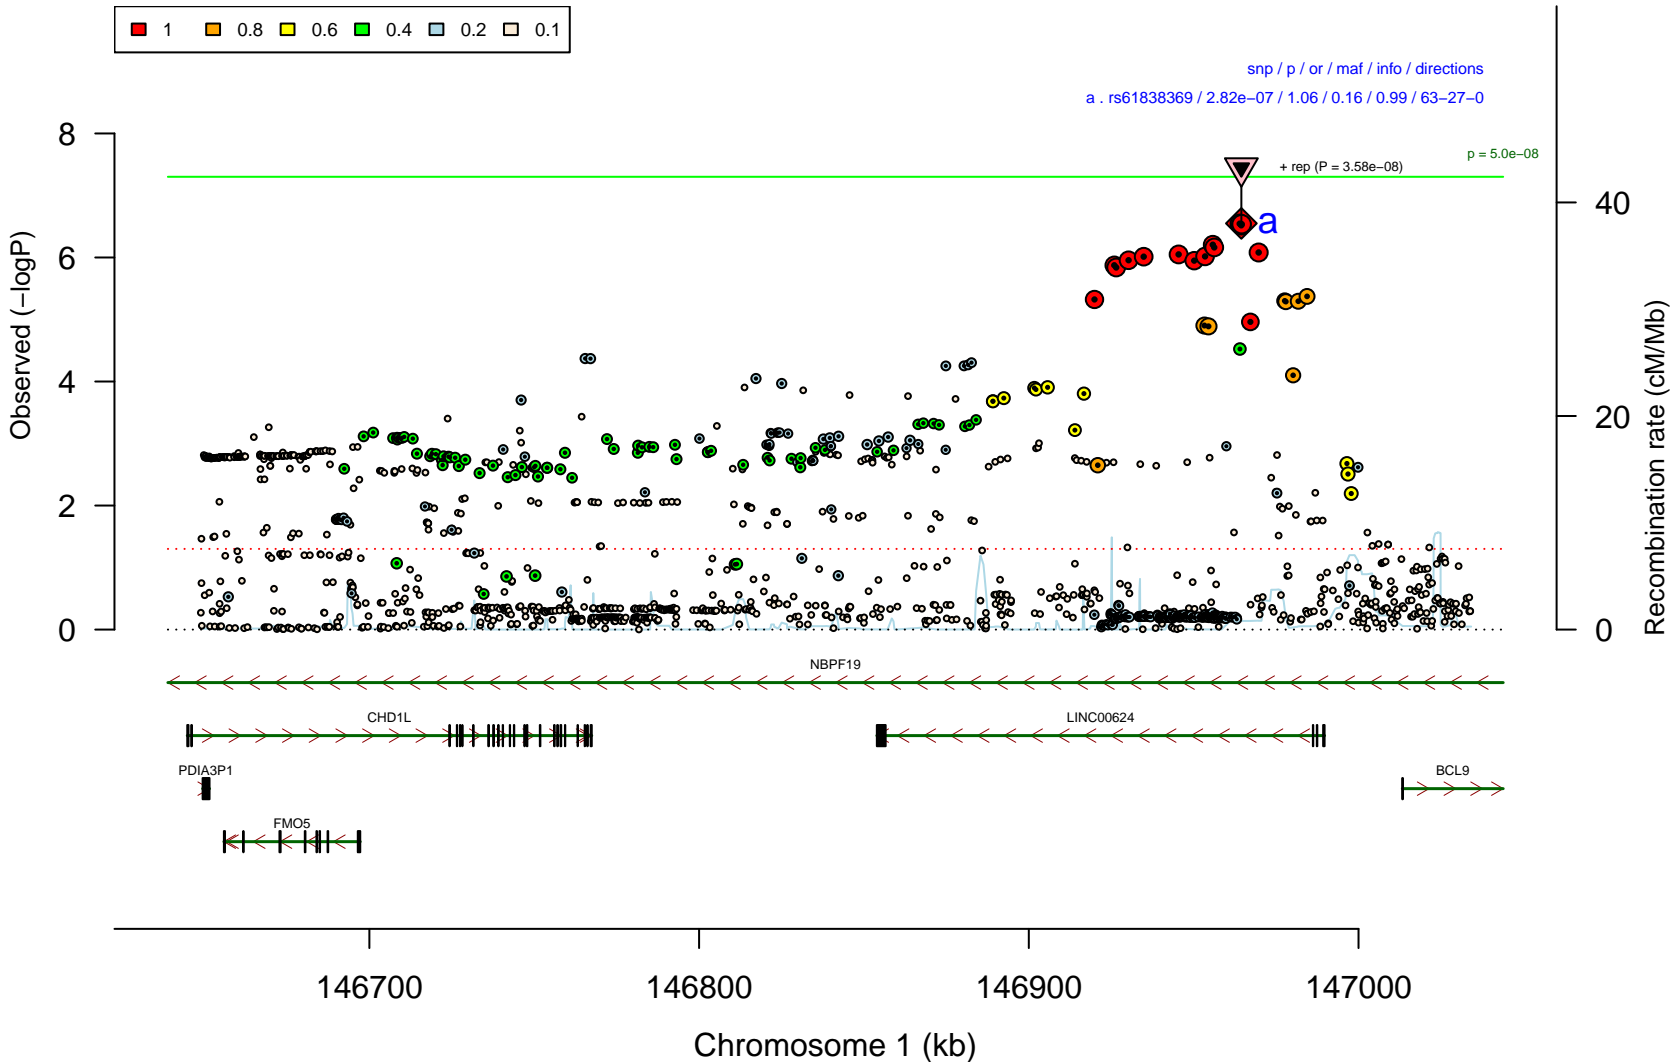

# PGC\_SCZ\_w3\_90\_0418b.212.chr14

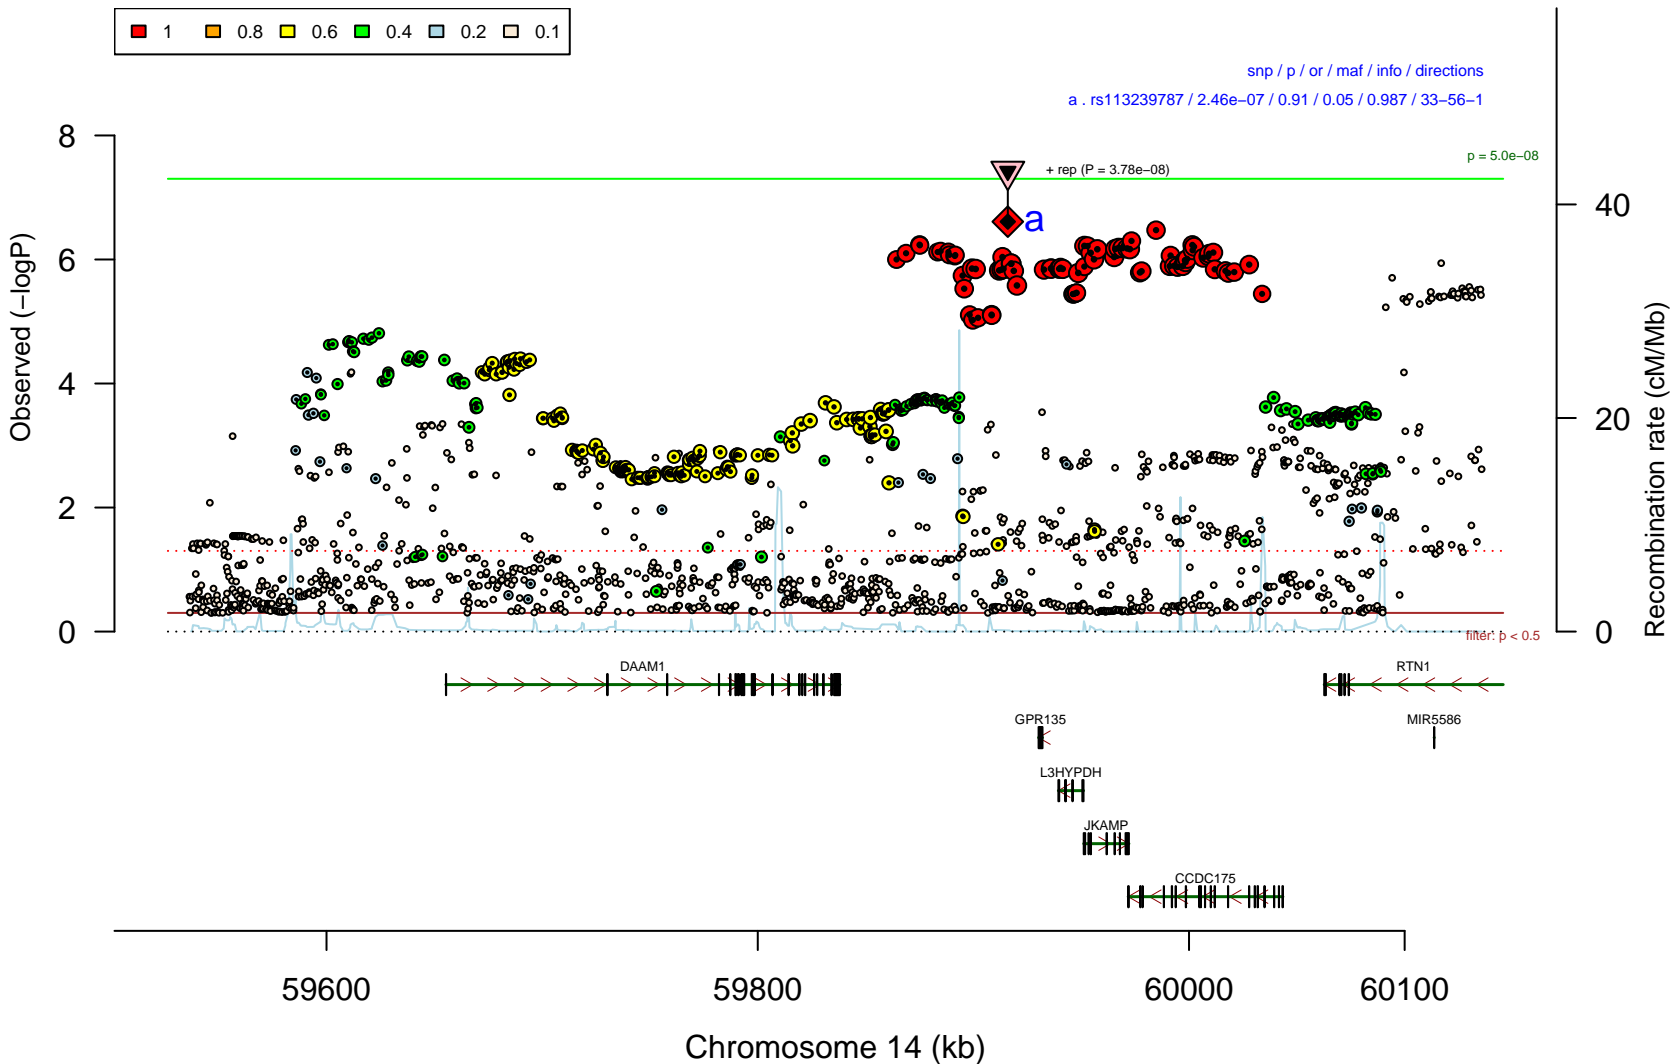



# PGC\_SCZ\_w3\_90\_0418b.124.chr7

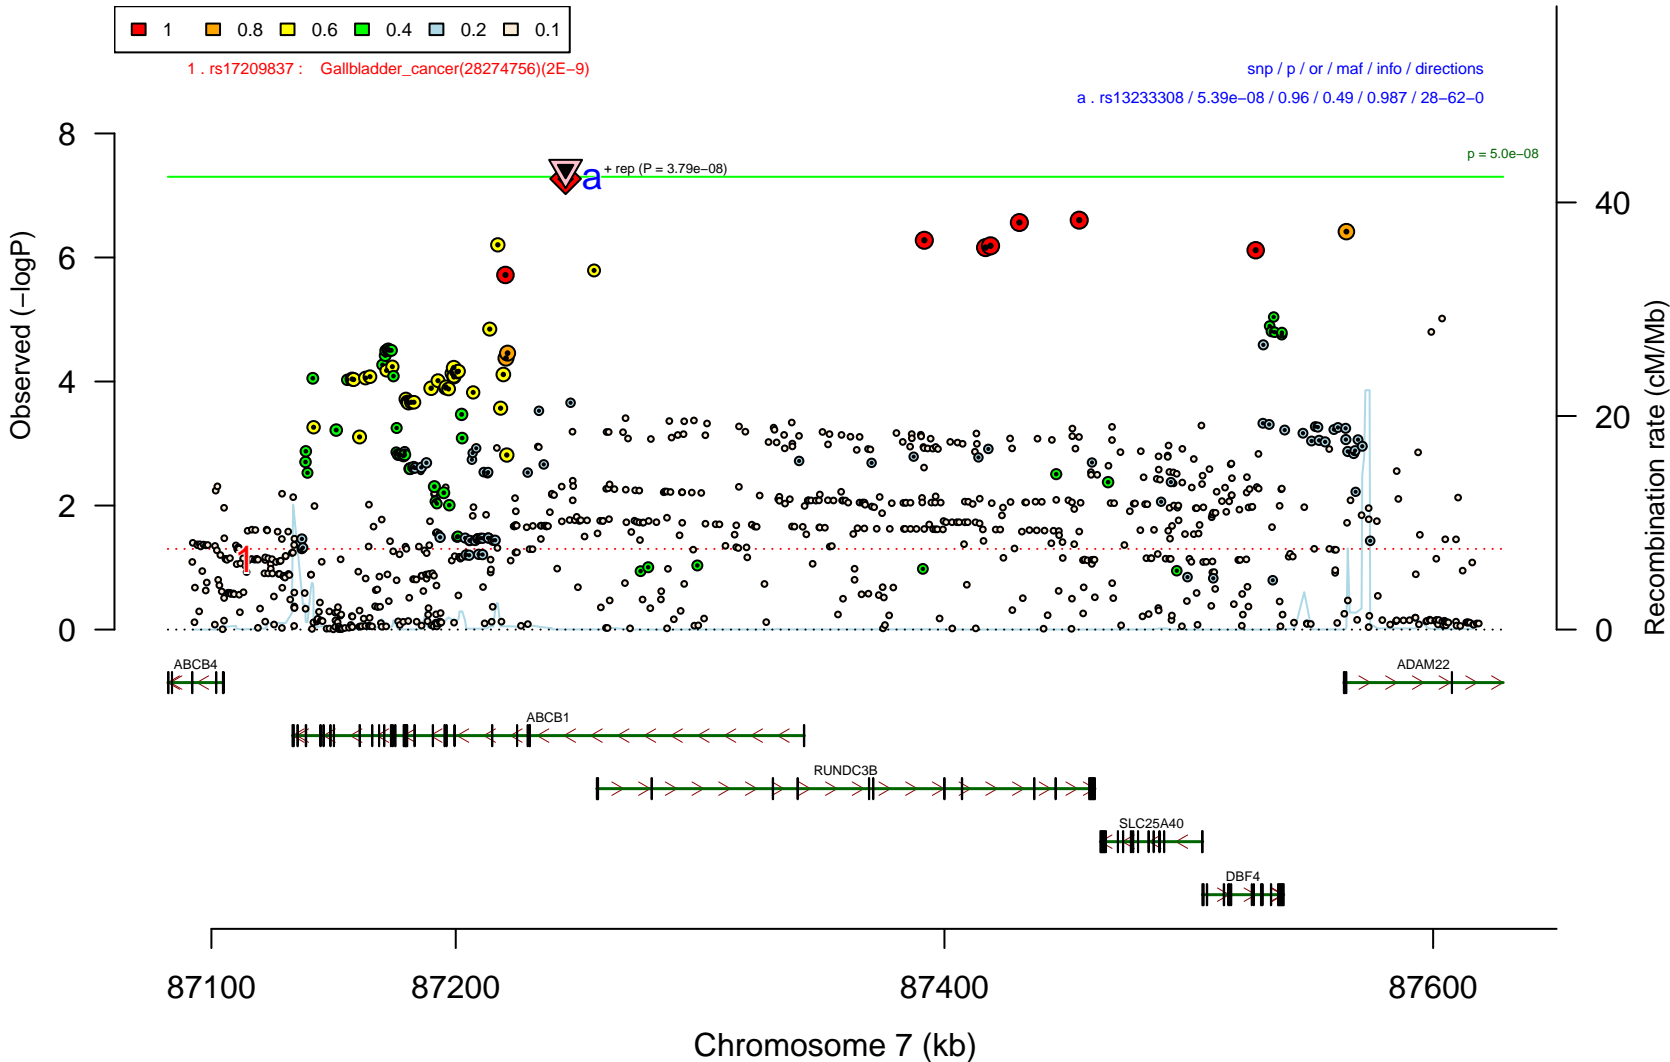

# PGC\_SCZ\_w3\_90\_0418b.264.chr22

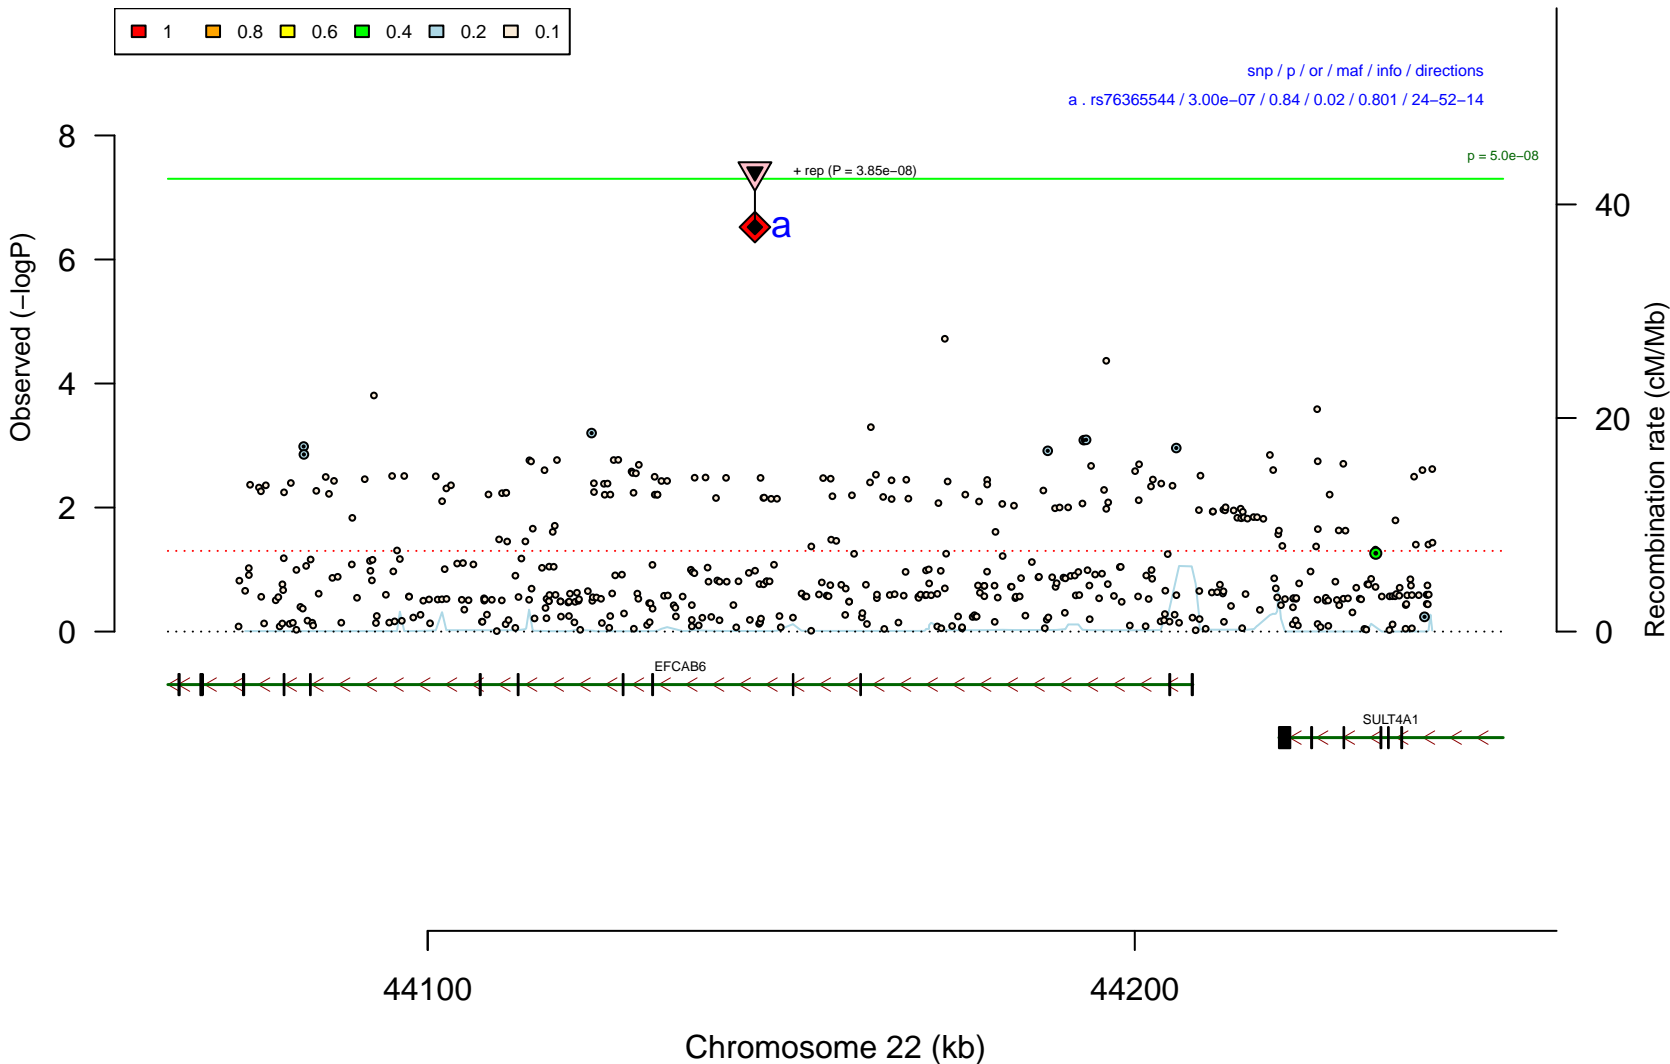

# PGC\_SCZ\_w3\_90\_0418b.56.chr3

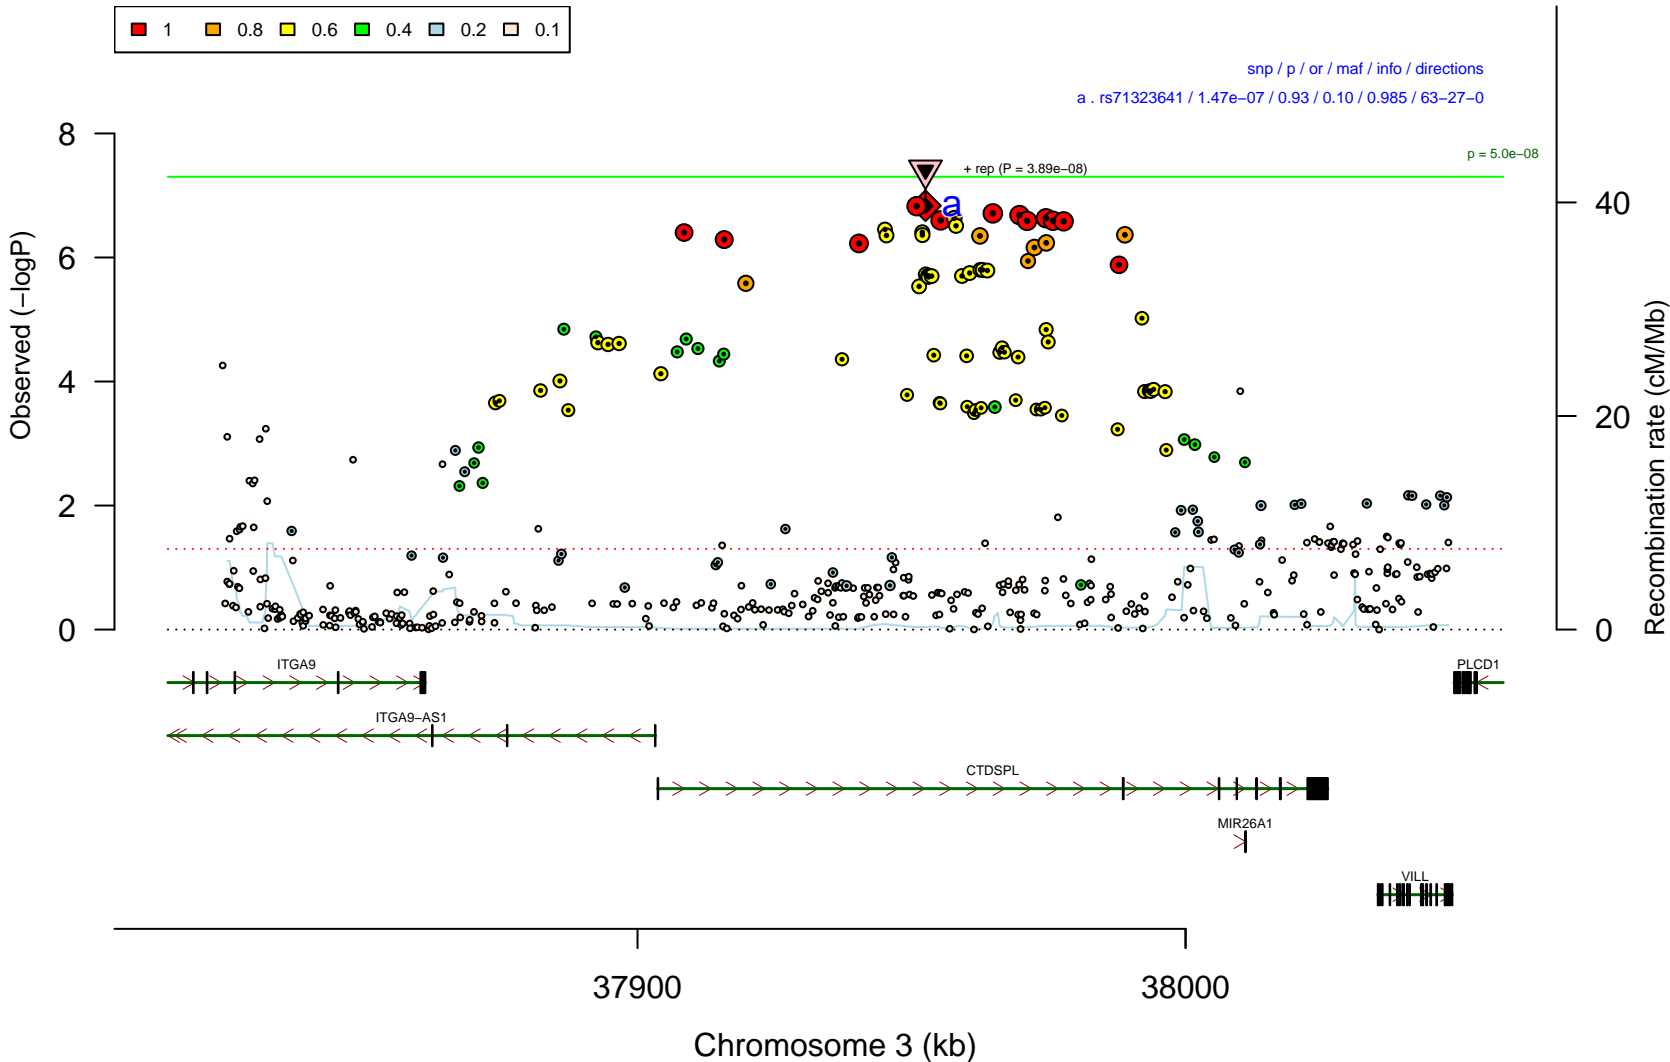

# PGC\_SCZ\_w3\_90\_0418b.217.chr15

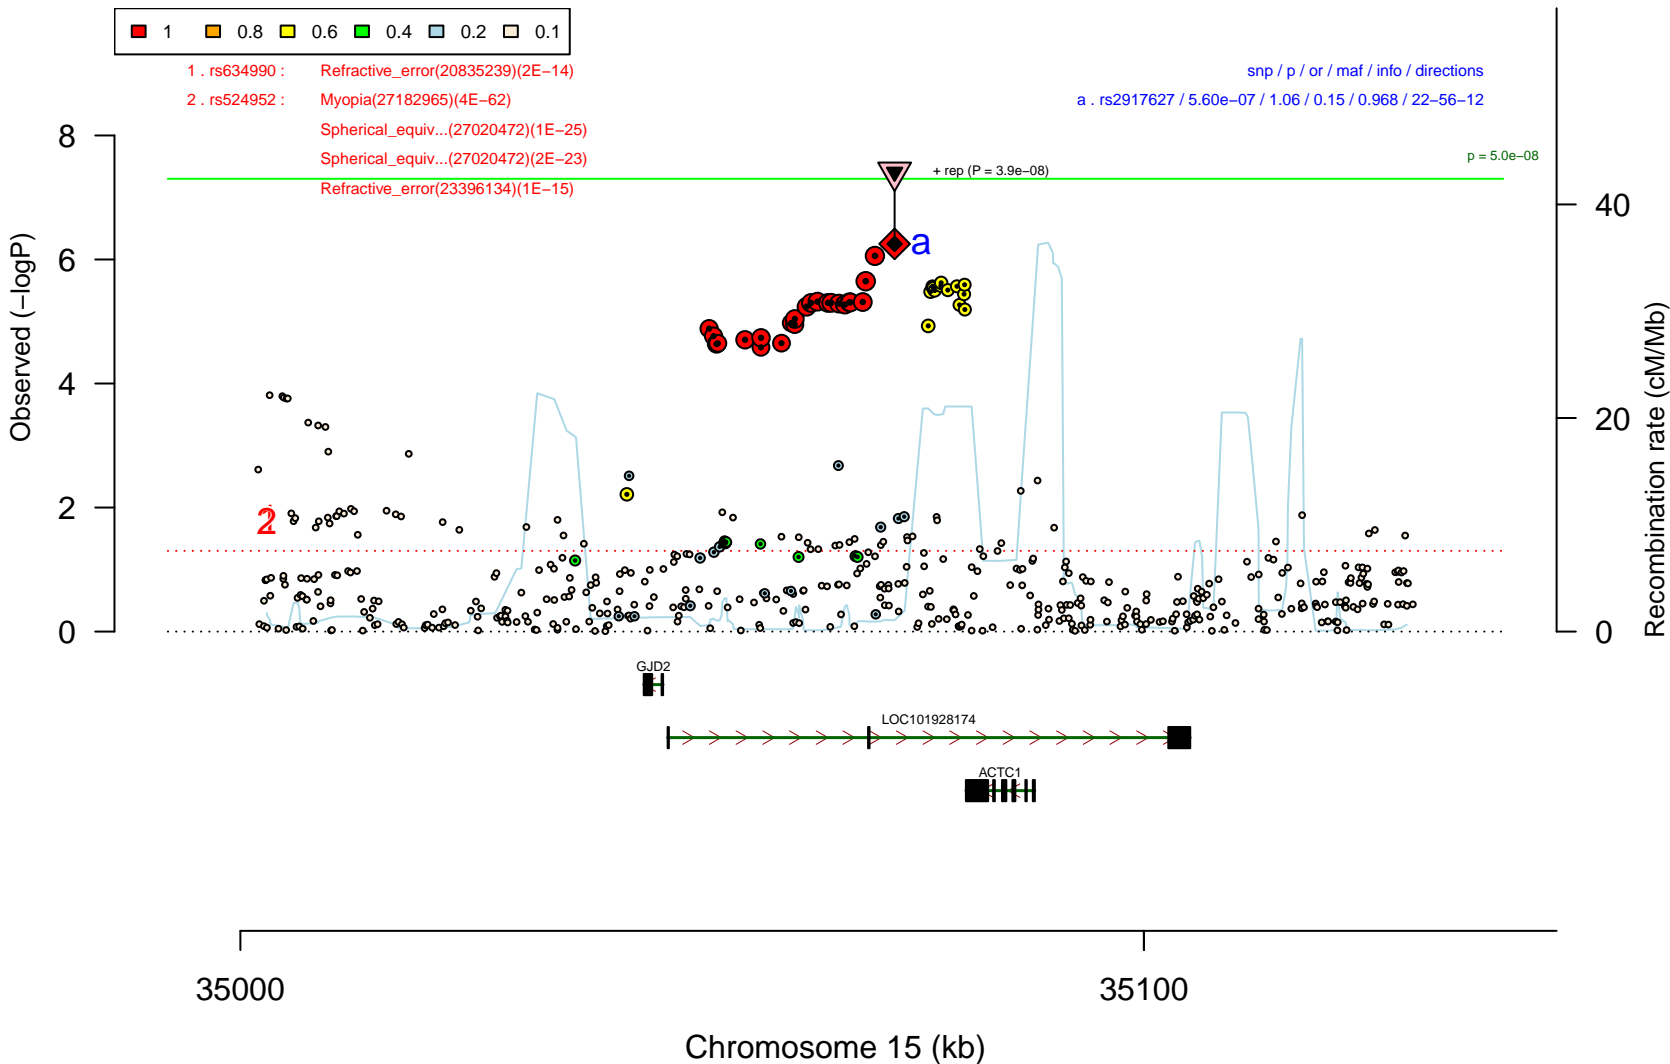

# PGC\_SCZ\_w3\_90\_0418b.42.chr2

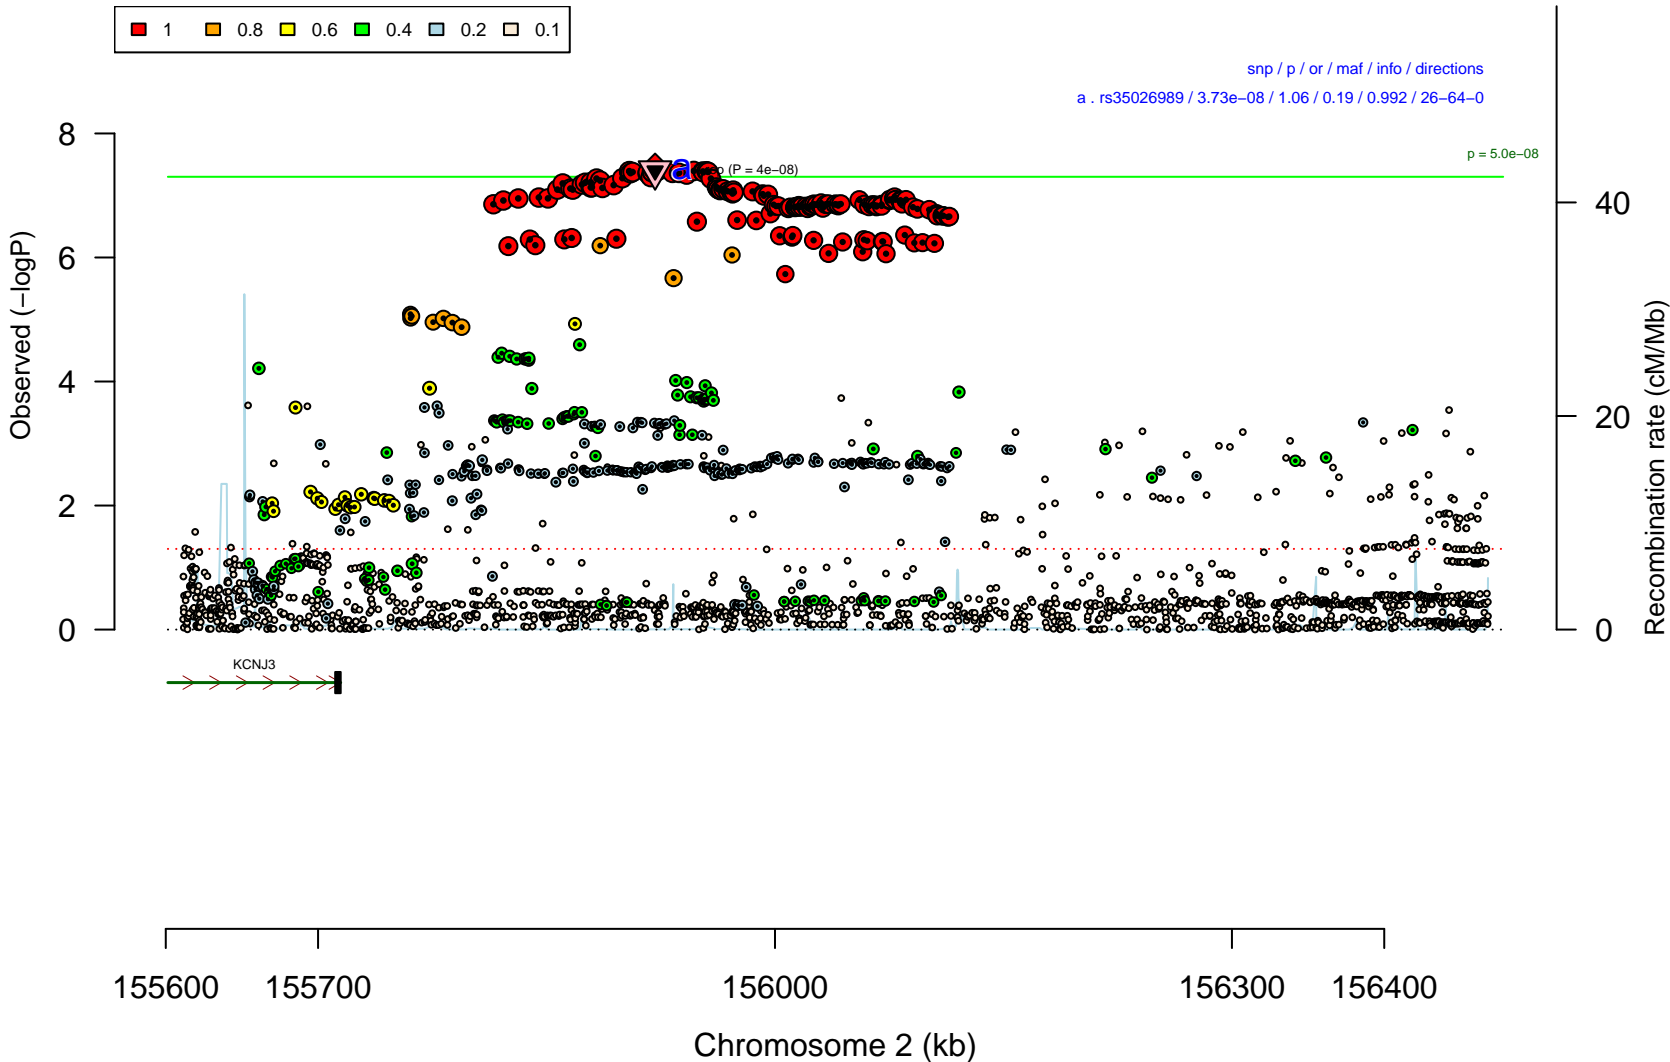

# PGC\_SCZ\_w3\_90\_0418b.110.chr6

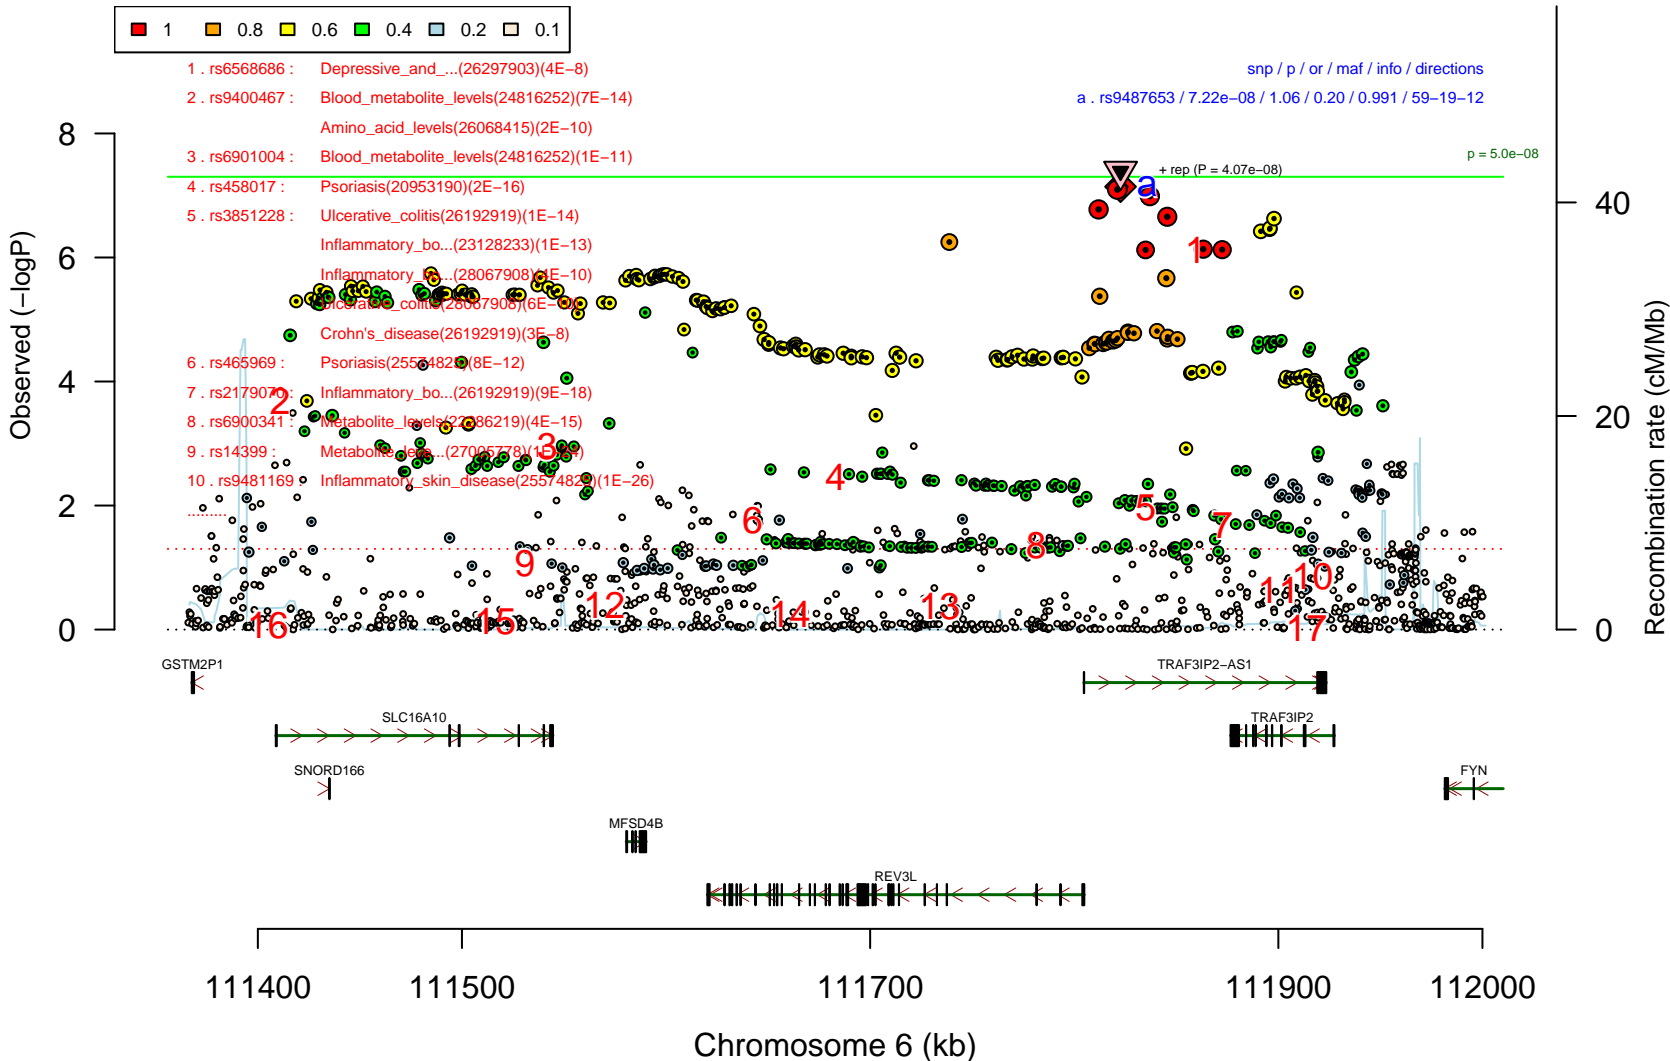

# PGC\_SCZ\_w3\_90\_0418b.81.chr5

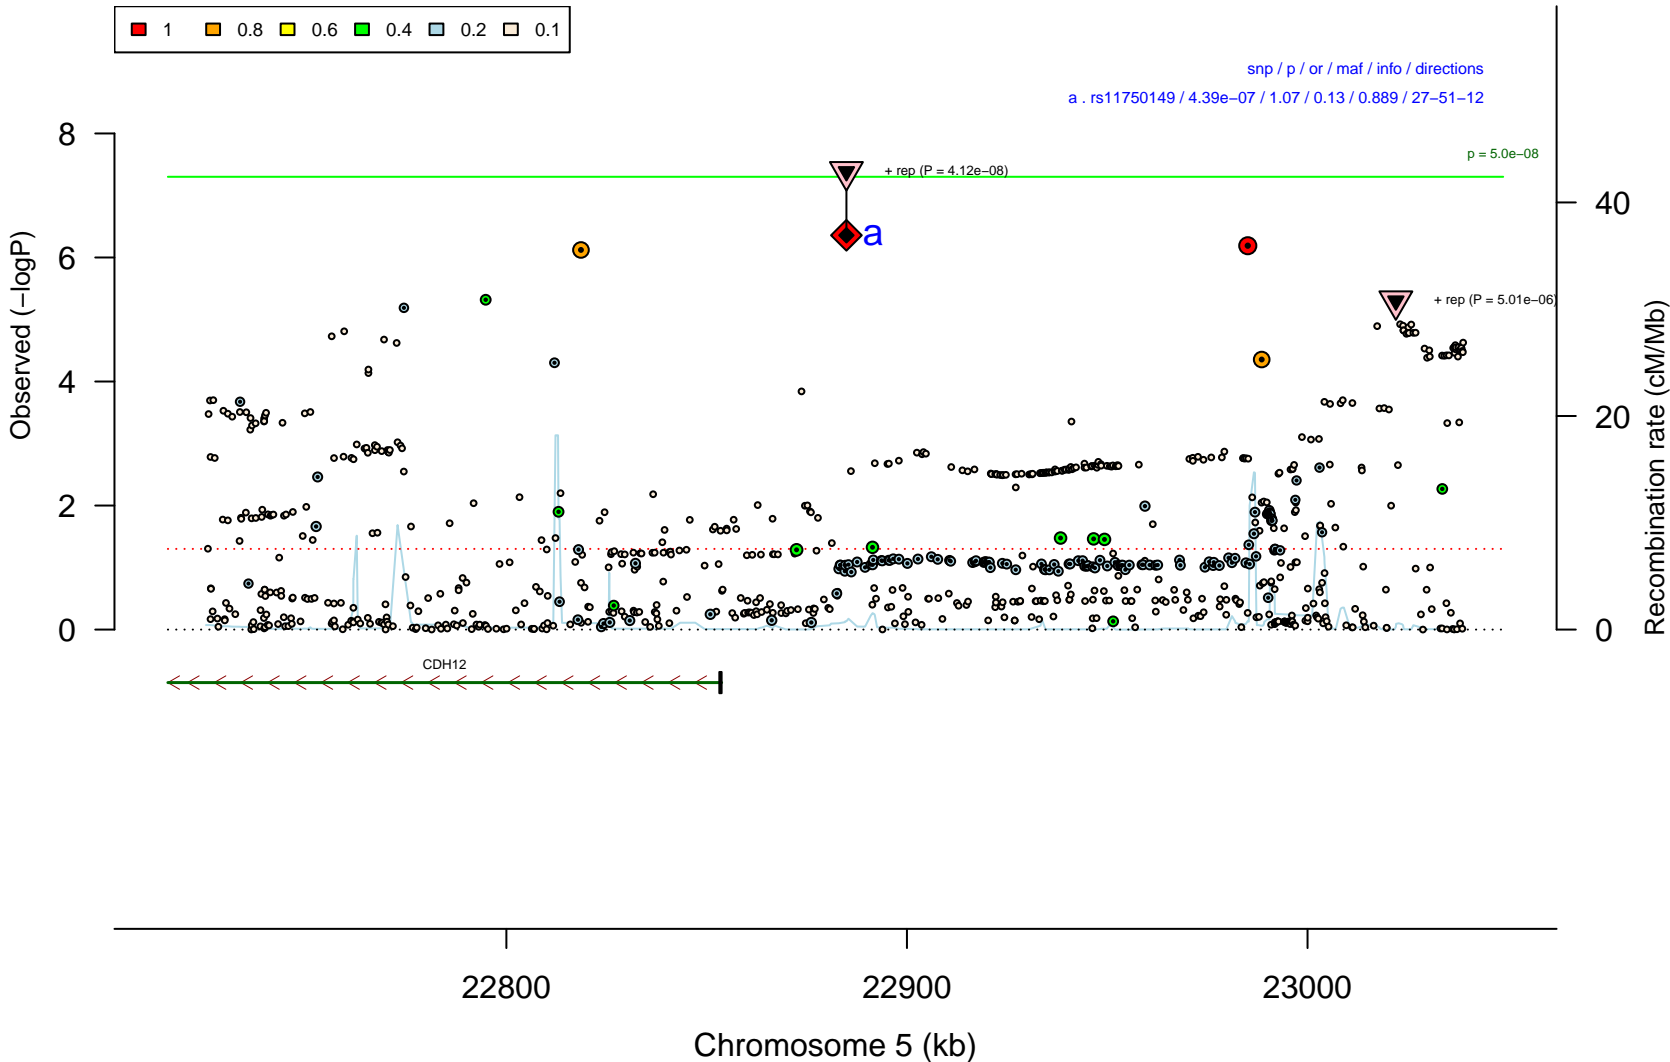

# PGC\_SCZ\_w3\_90\_0418b.125.chr7

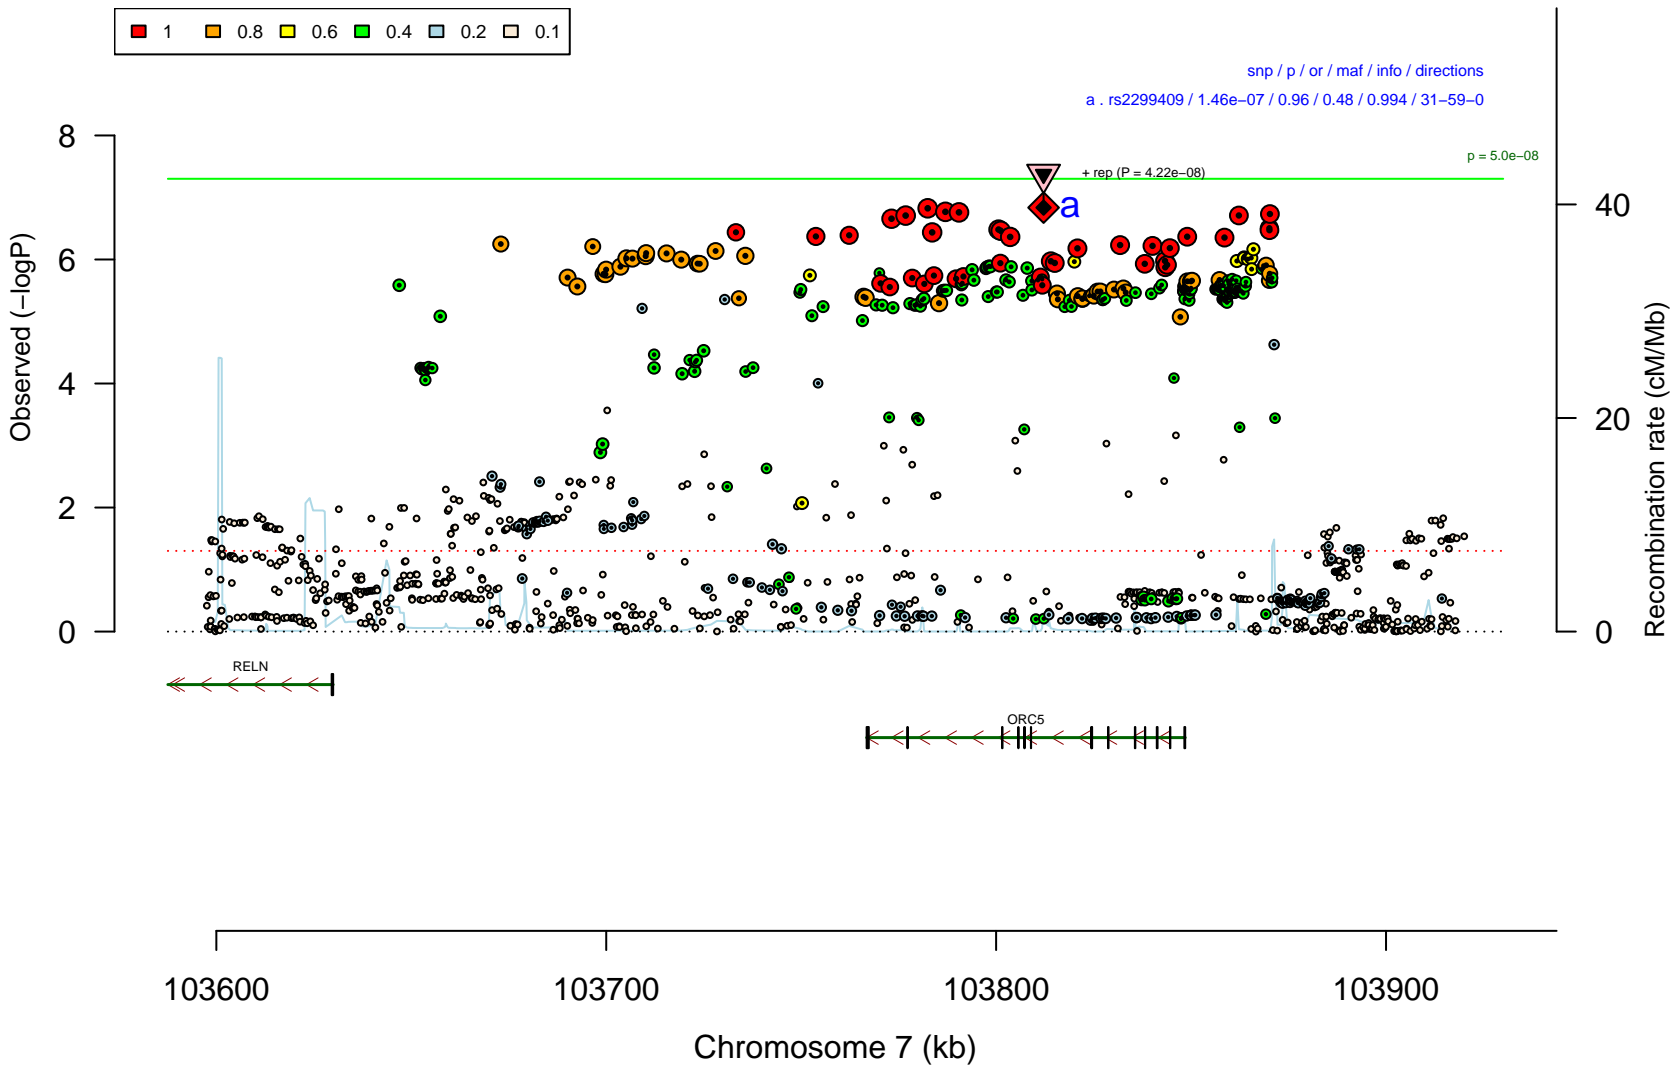



# PGC\_SCZ\_w3\_90\_0418b.186.chr12

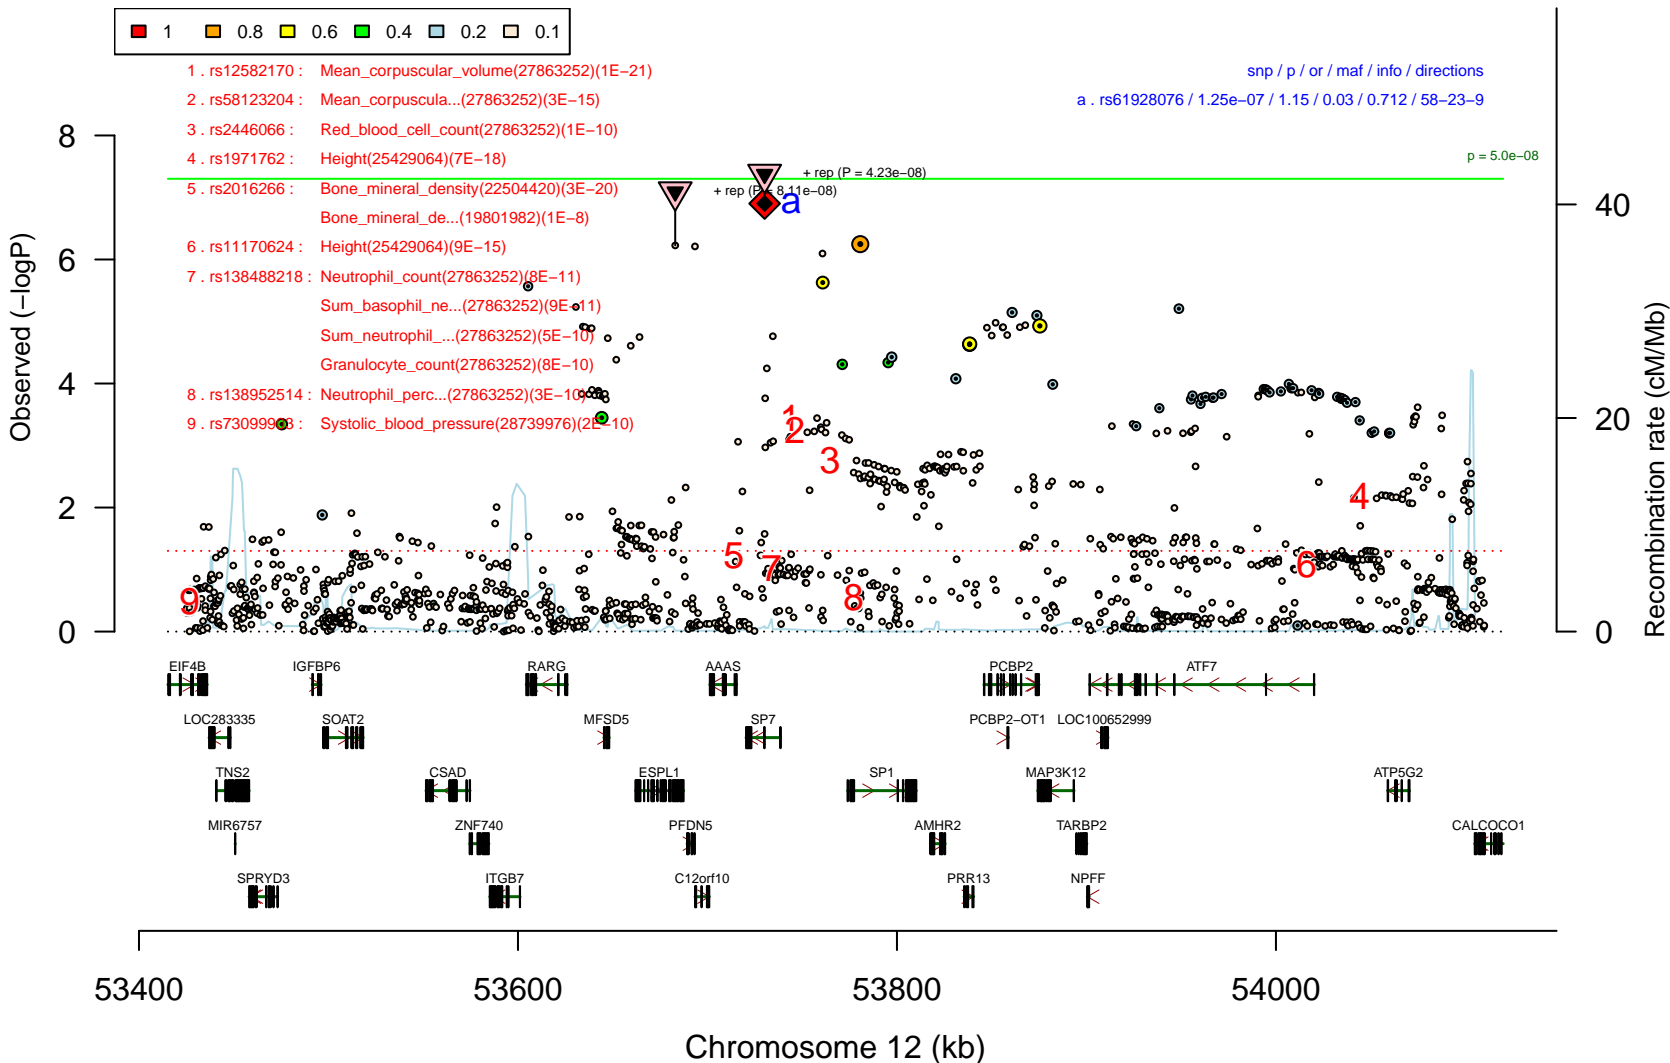

# PGC\_SCZ\_w3\_90\_0418b.167.chr11

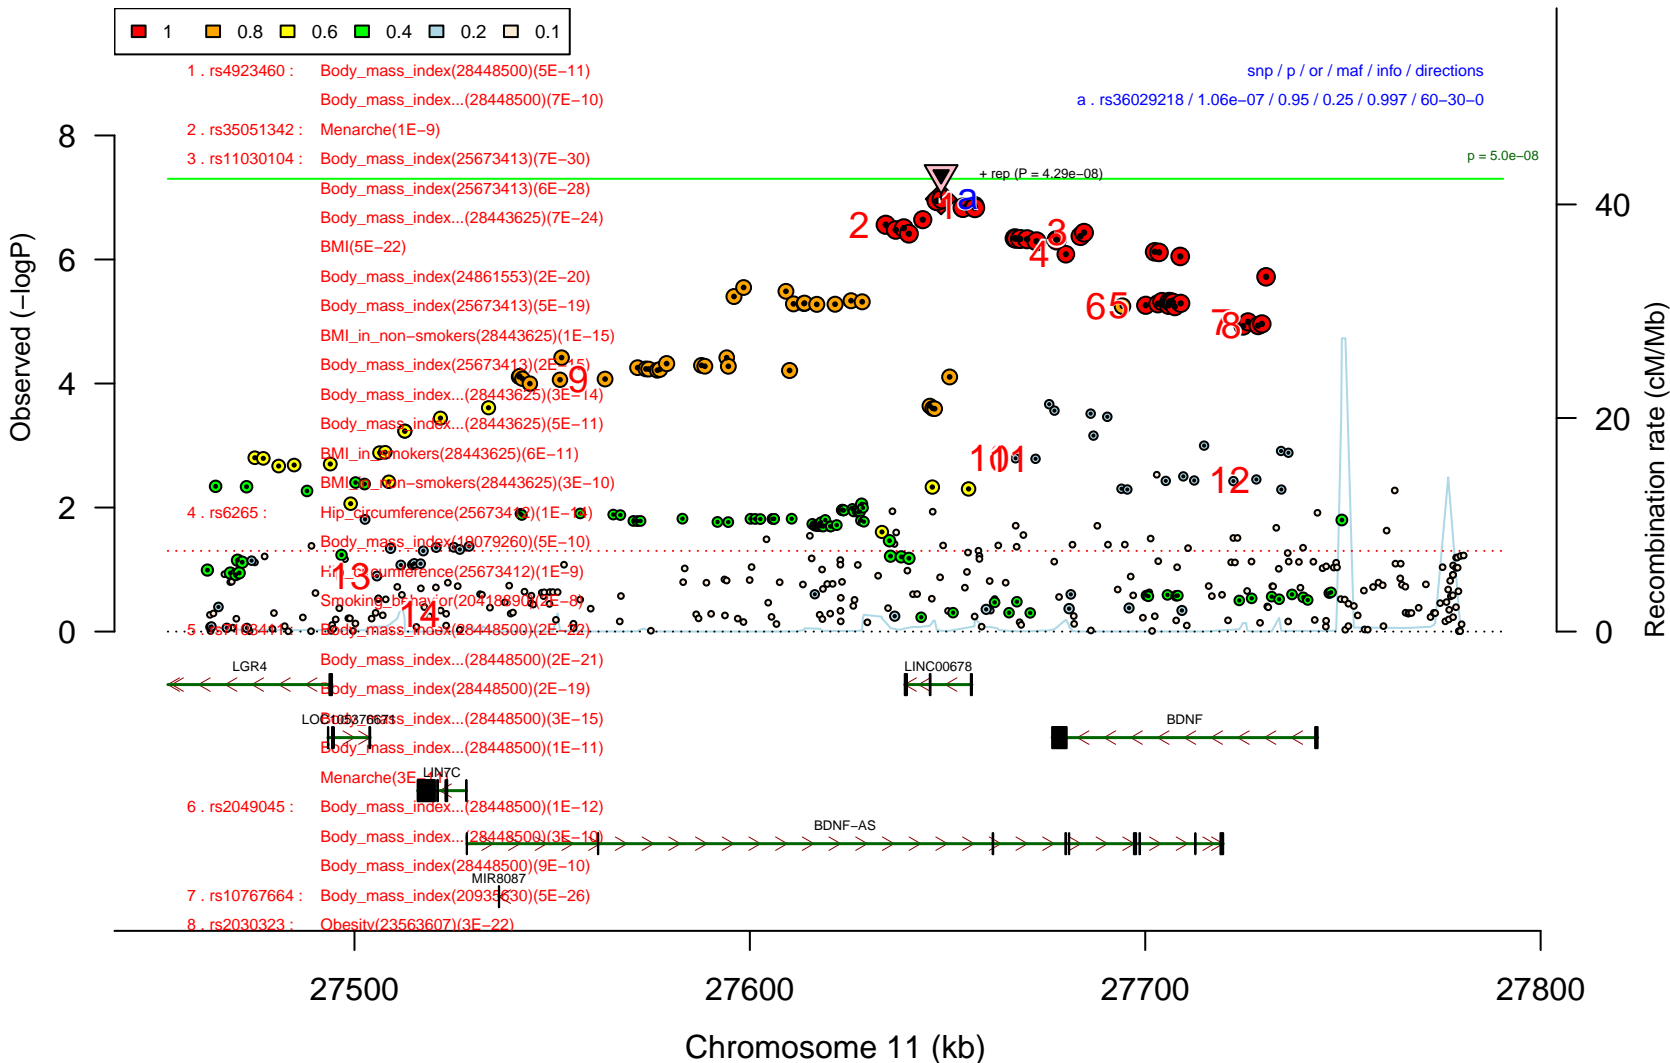

# PGC\_SCZ\_w3\_90\_0418b.169.chr11

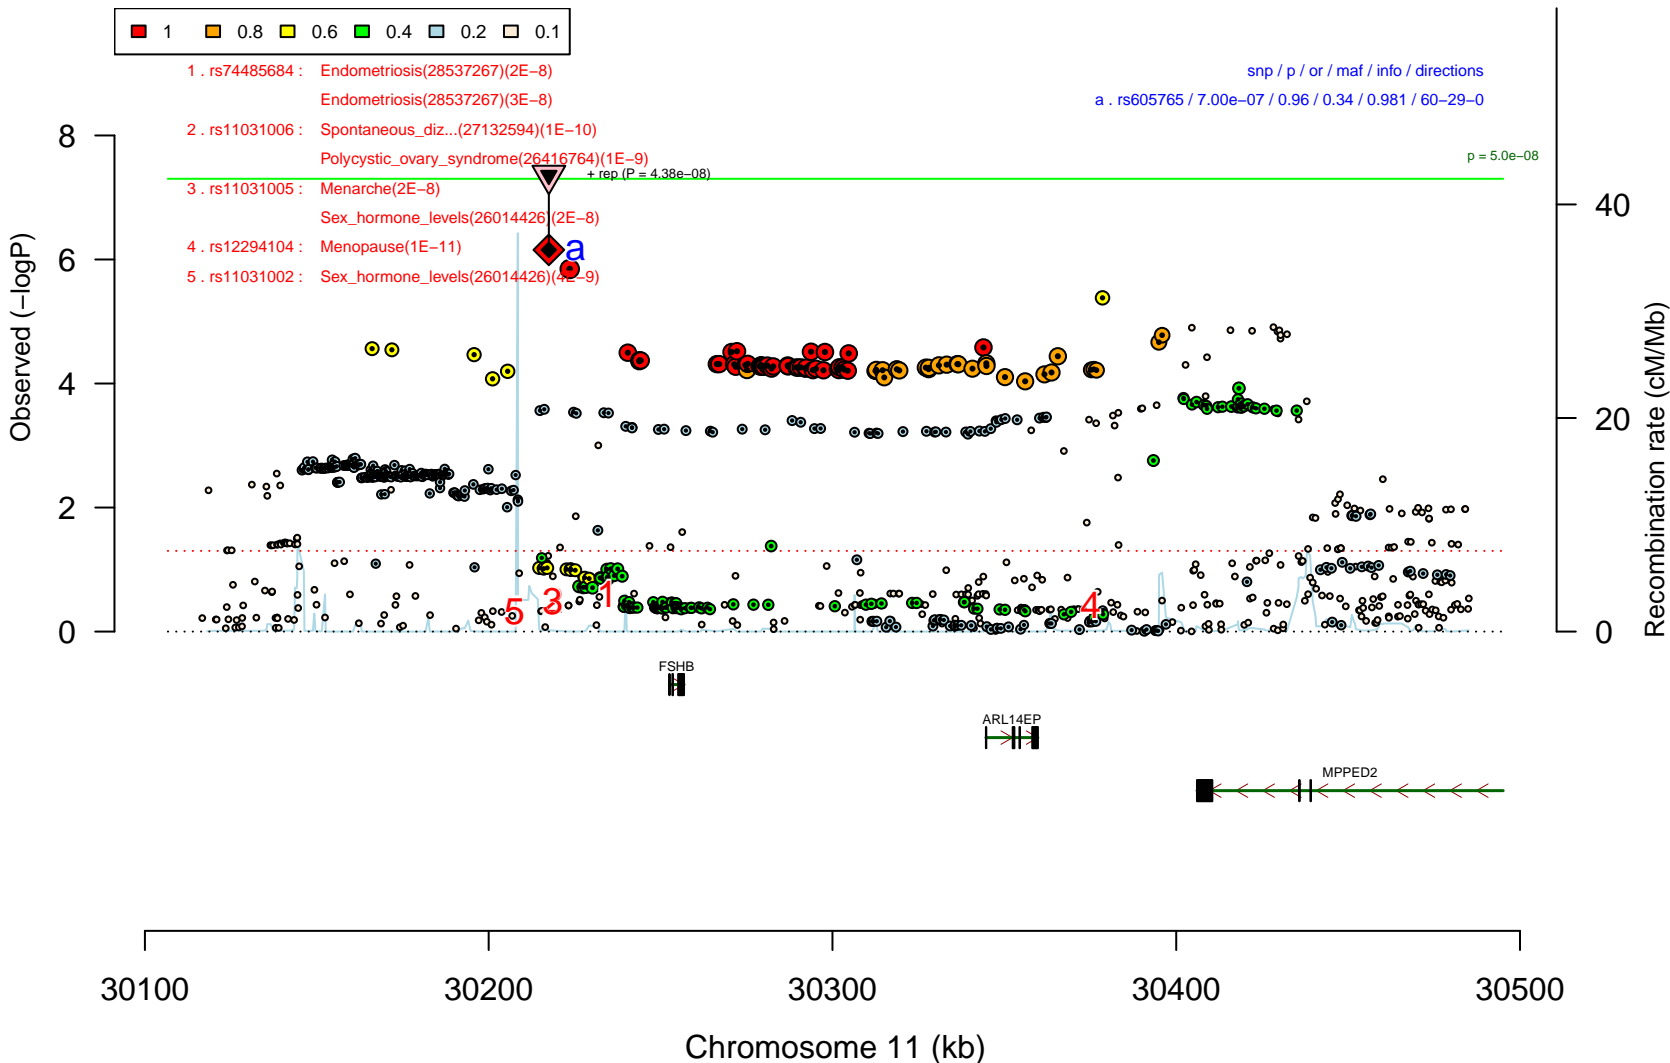

# PGC\_SCZ\_w3\_90\_0418b.86.chr5

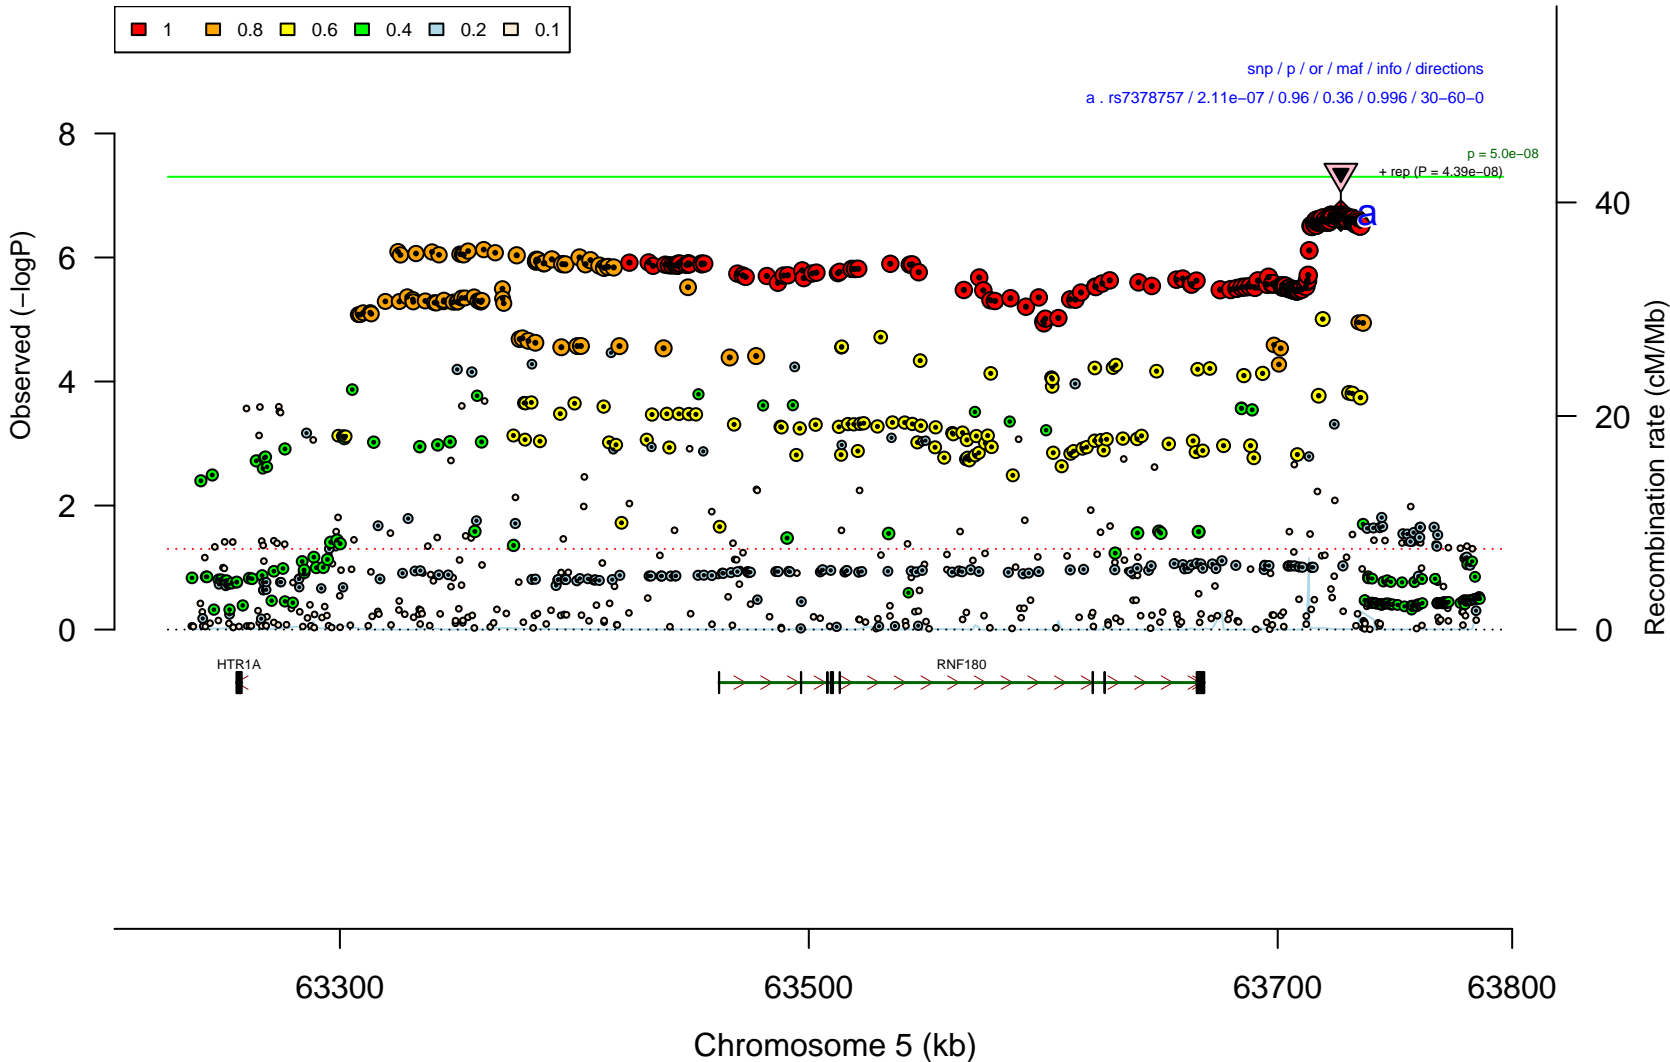

# PGC\_SCZ\_w3\_90\_0418b.220.chr15

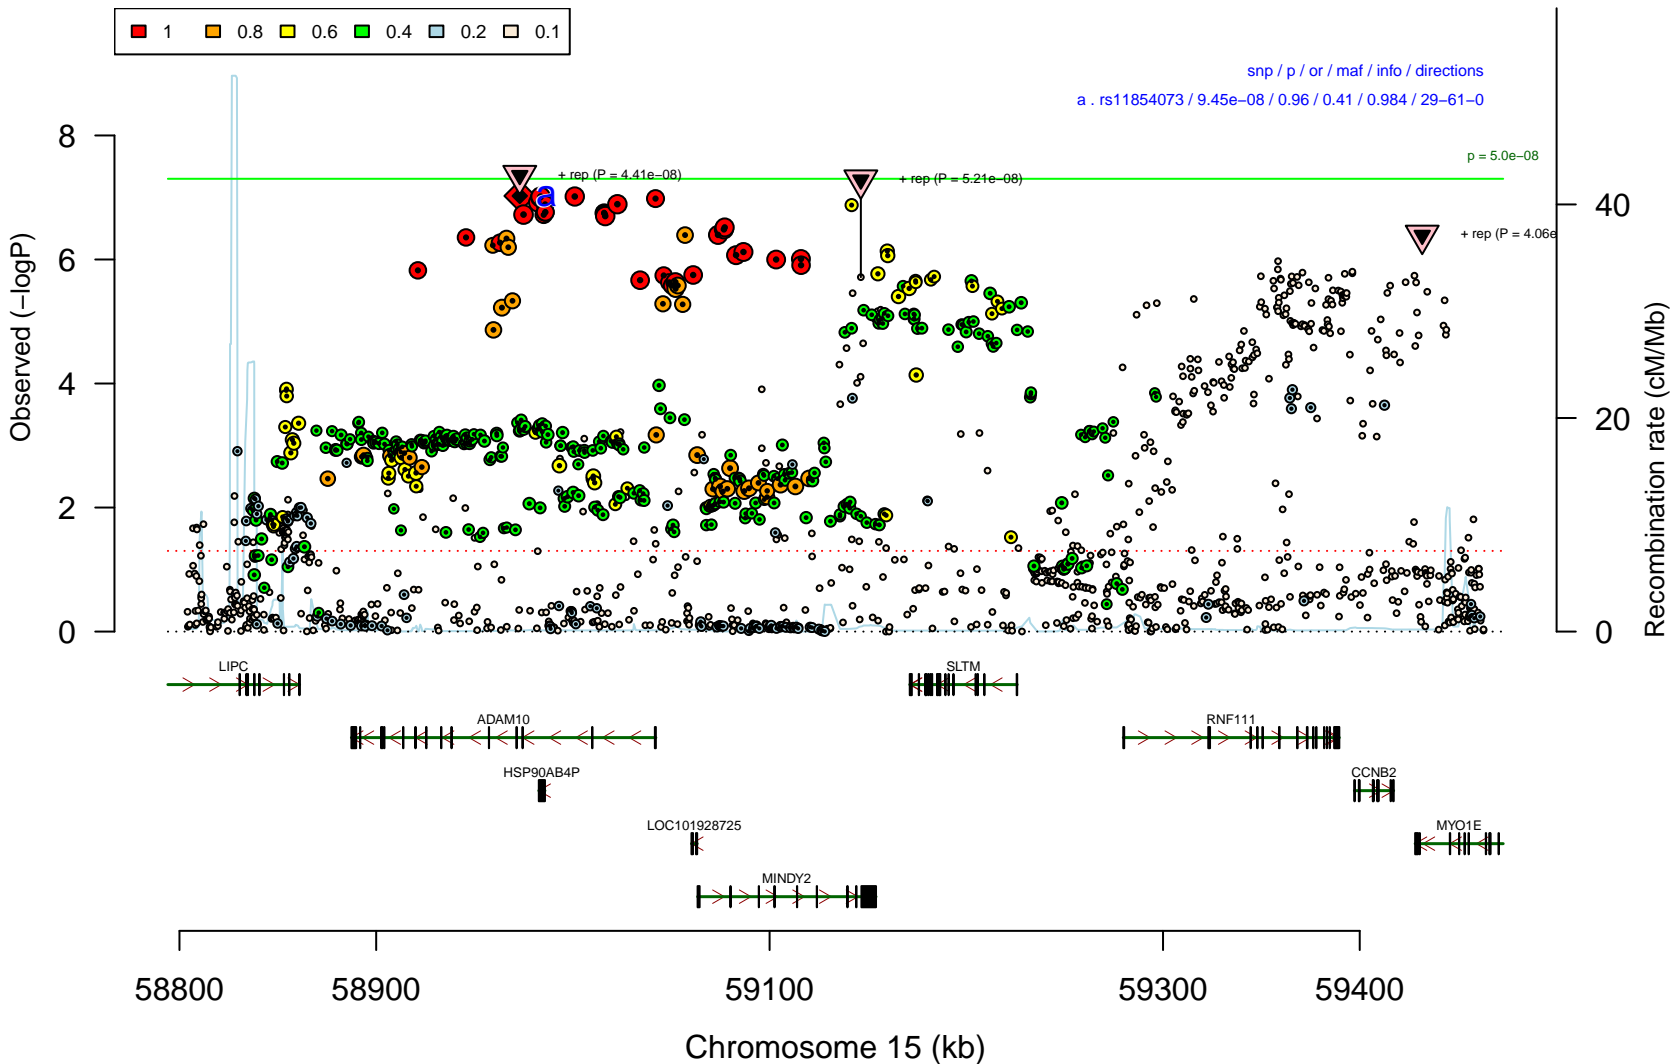

# PGC\_SCZ\_w3\_90\_0418b.112.chr6

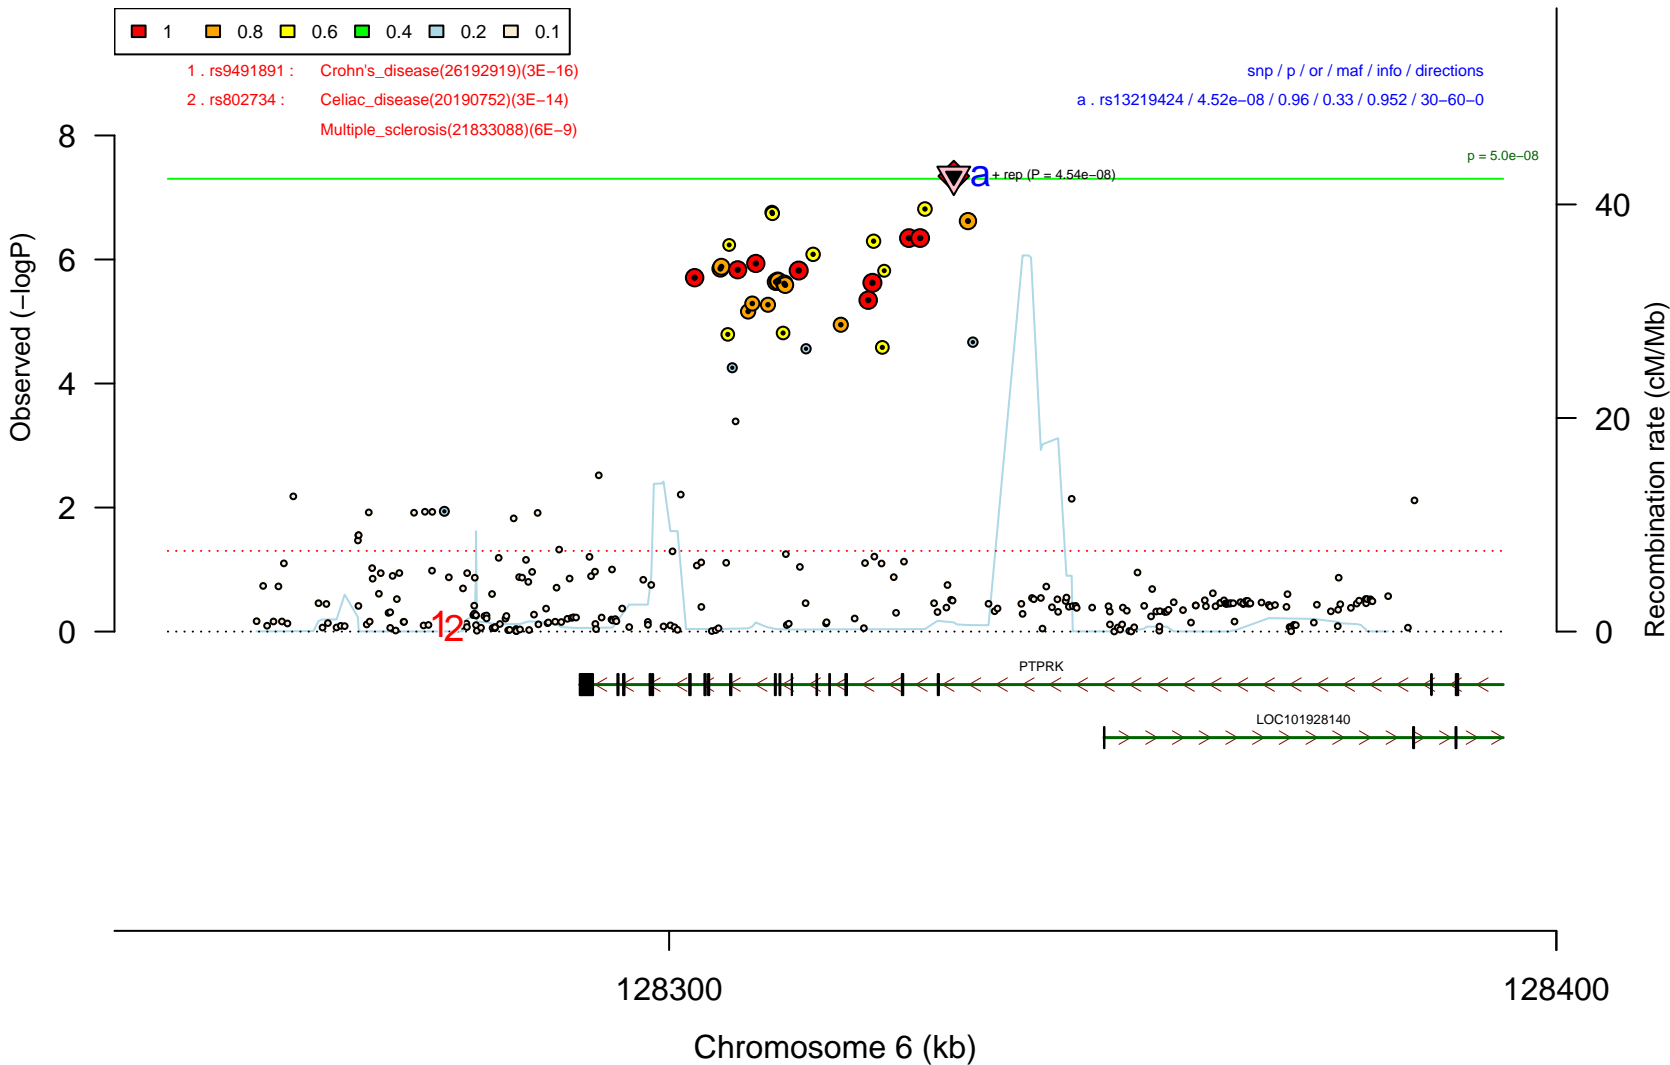

# PGC\_SCZ\_w3\_90\_0418b.103.chr6

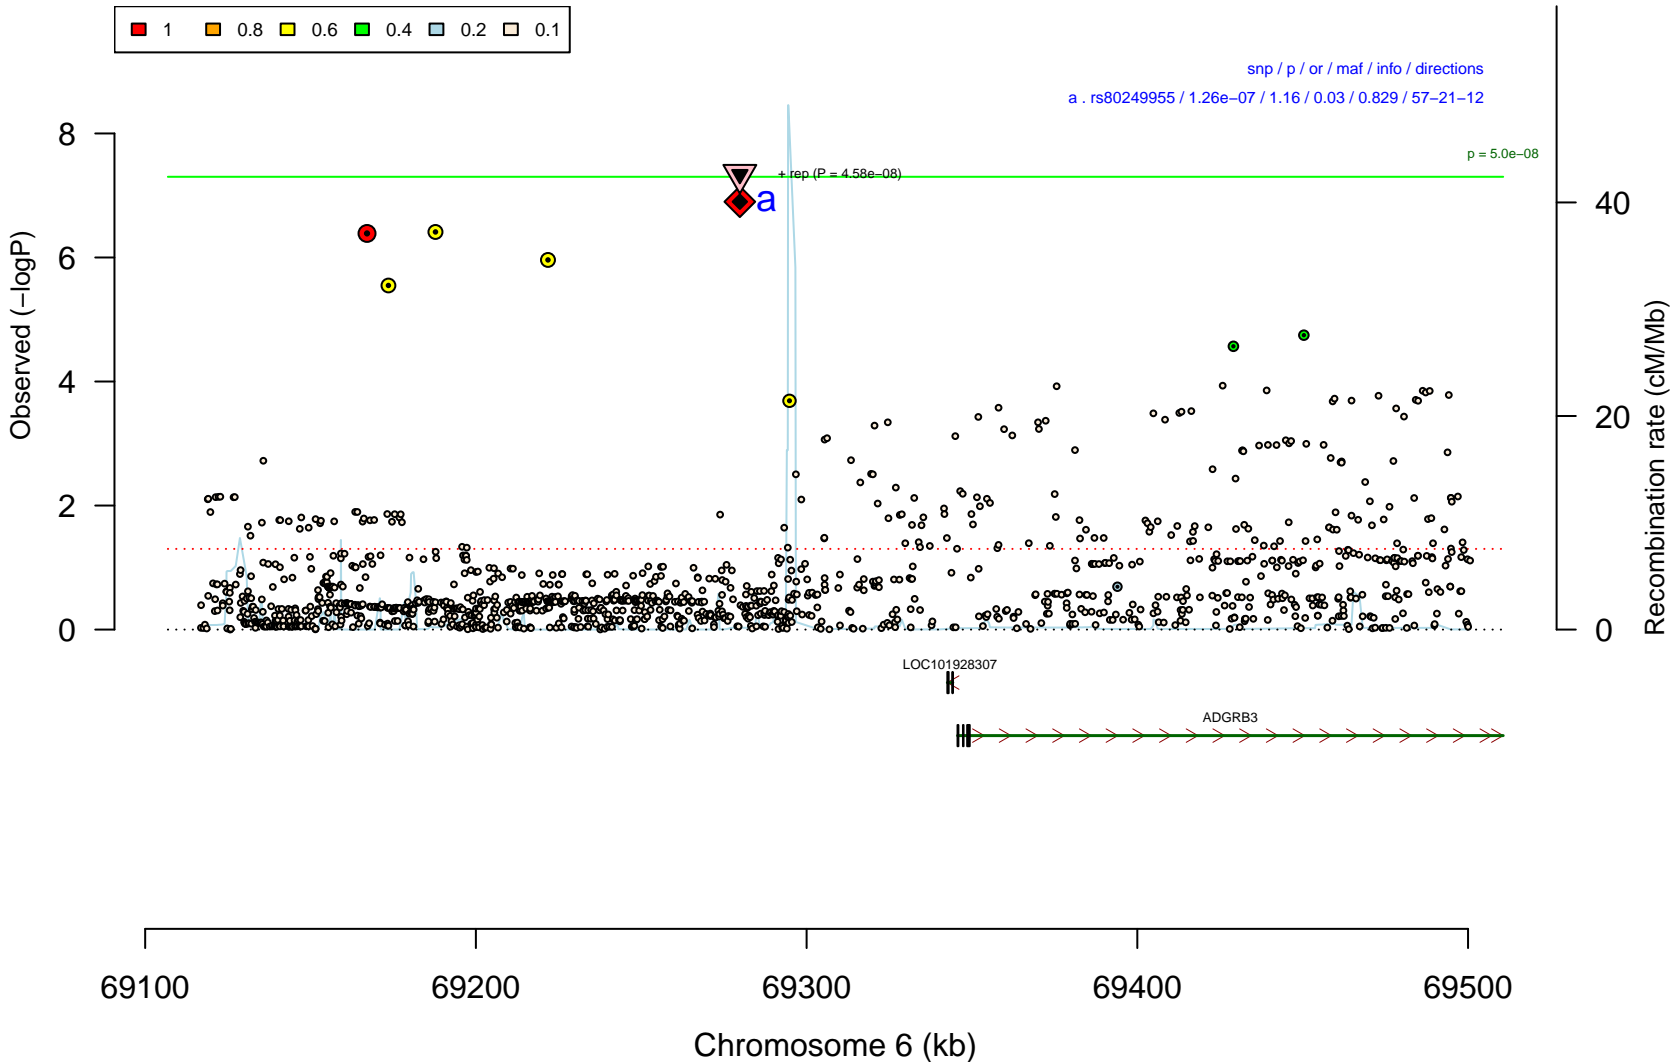

# PGC\_SCZ\_w3\_90\_0418b.201.chr12

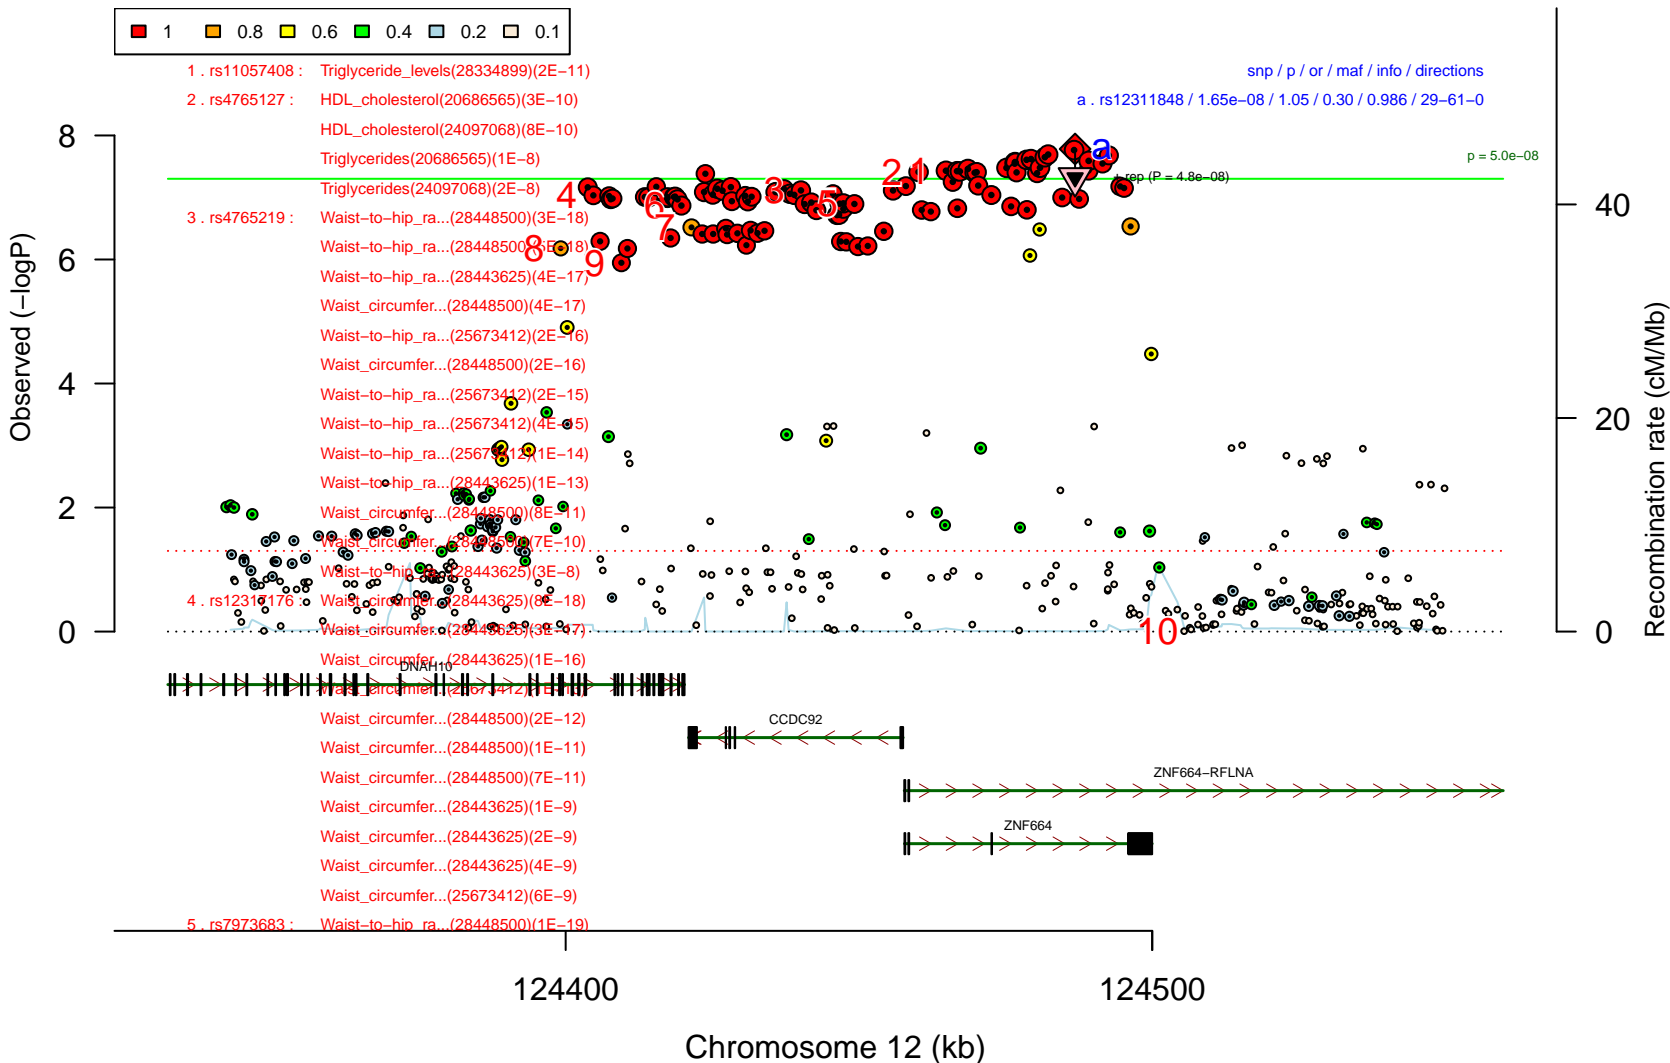



# PGC\_SCZ\_w3\_90\_0418b.141.chr8

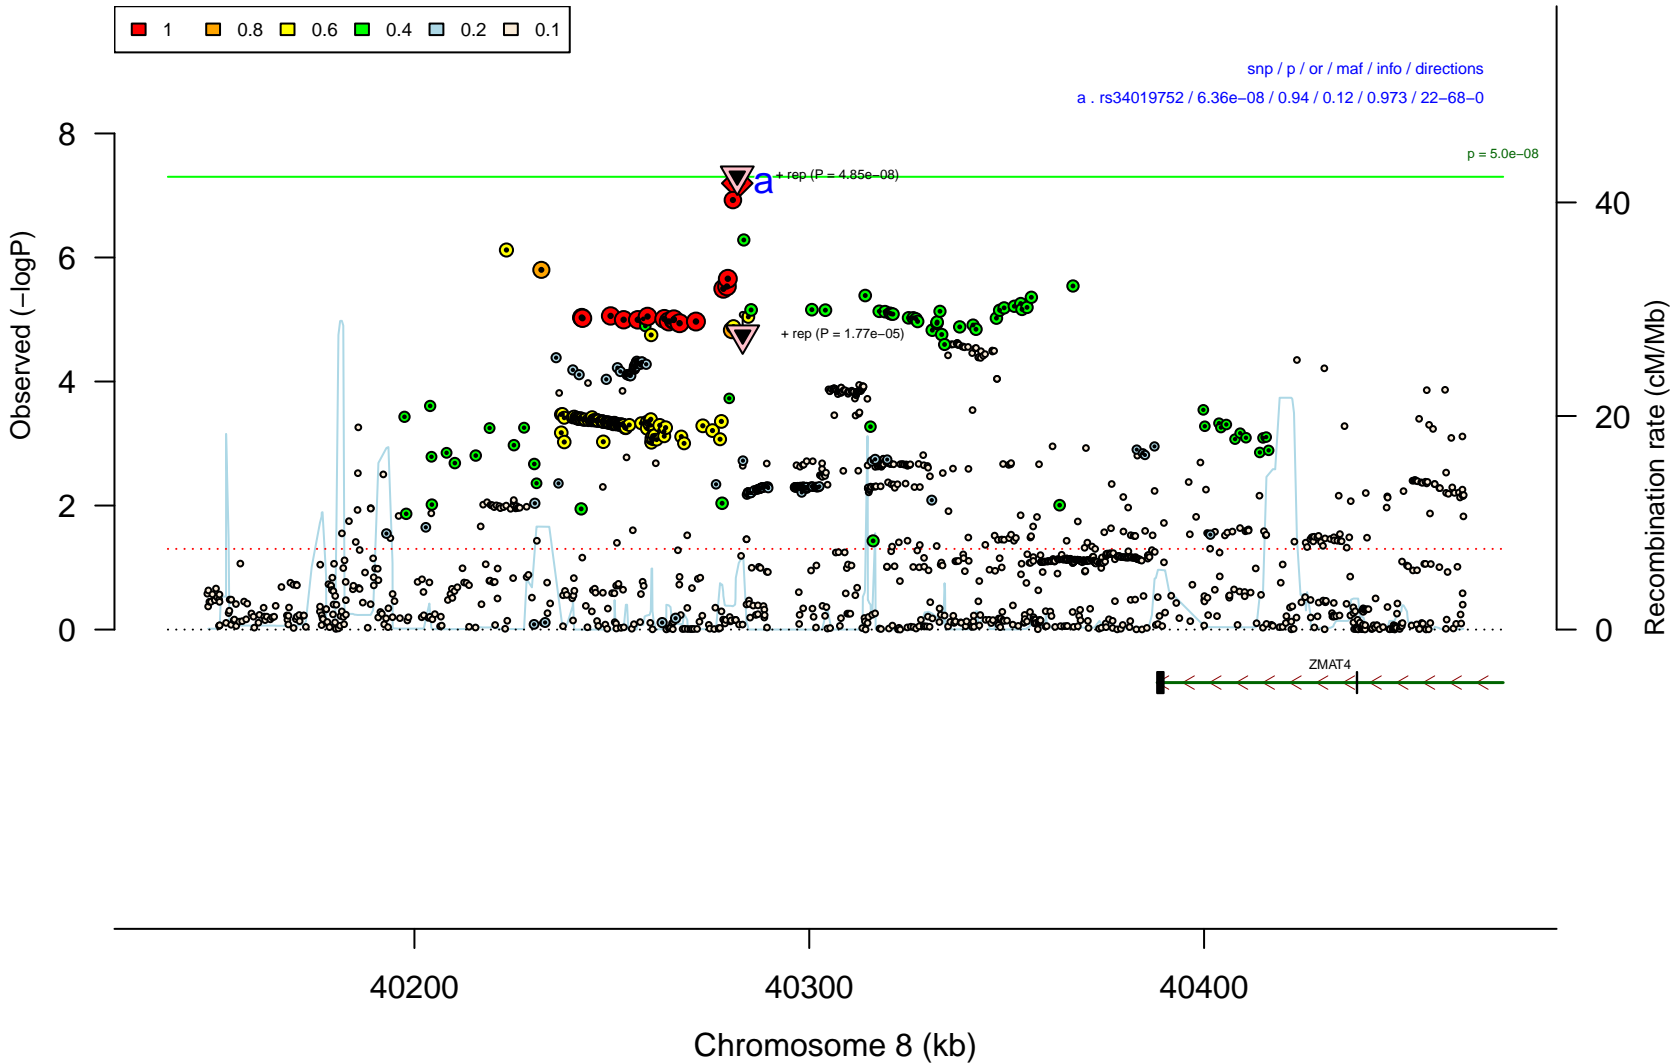

Supplement: Supplementary file [file 2020.09.12.20192922-5.zip]
