# Supplementary material
Source: bioRxiv or medRxiv preprint supplement (http://medrxiv.stage.highwire.org/highwire/filestream/96583/field_highwire_adjunct_files/4/2020.09.12.20192922-5.zip)

# MR Test

- Inverse variance weighted
- Maximum likelihood
- MR Egger
- Weighted median

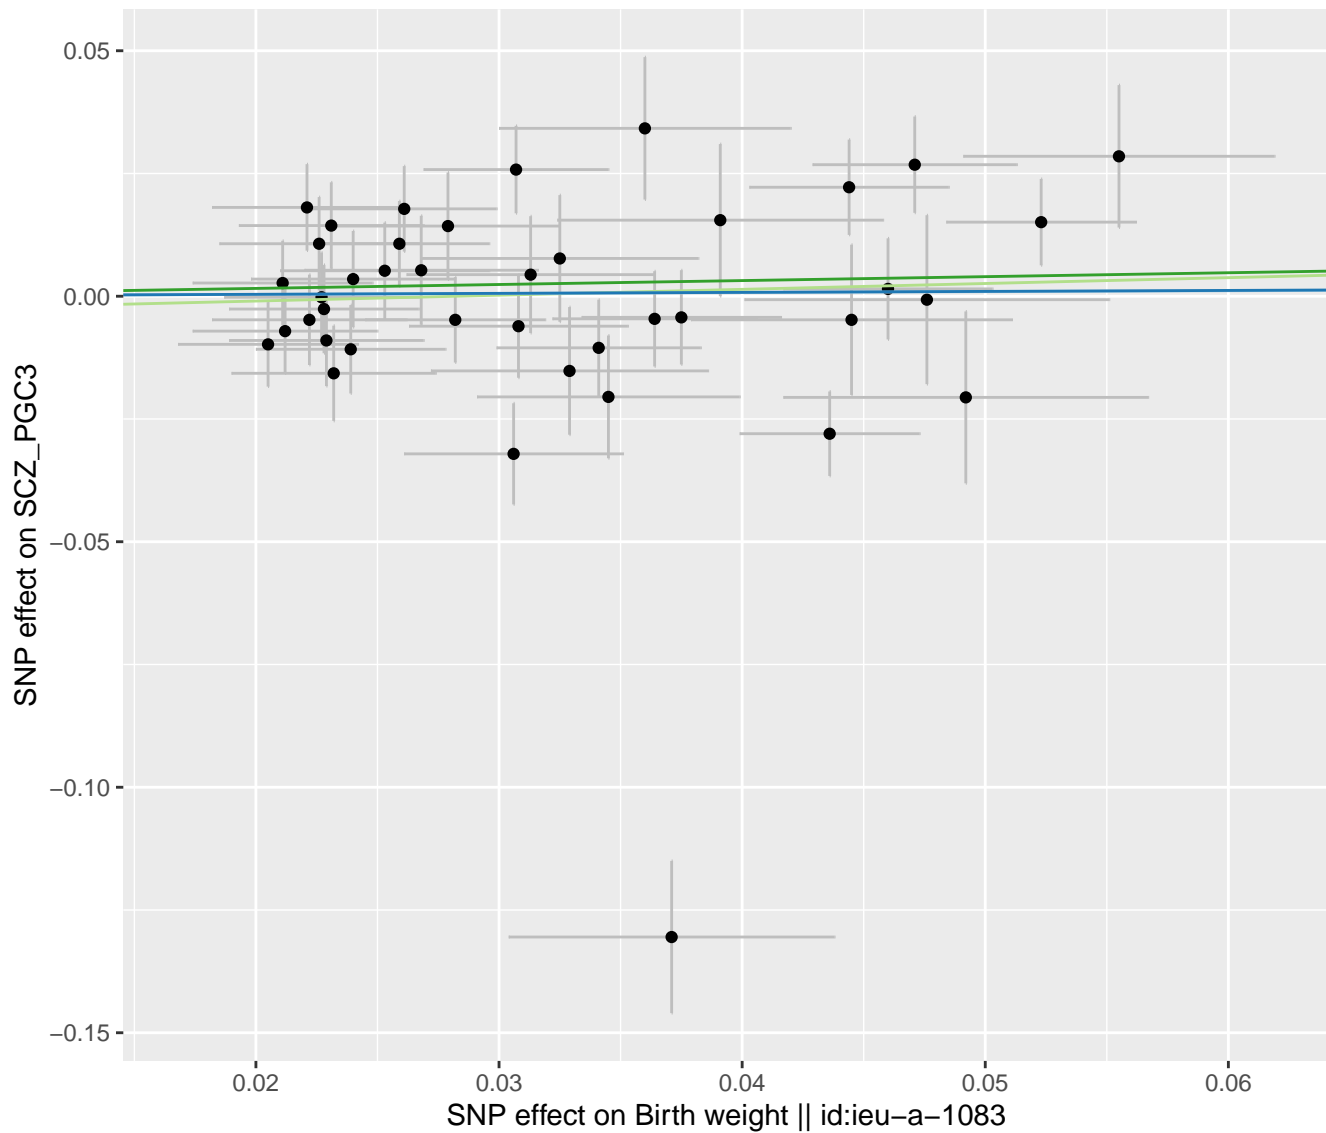

## MR Test

Inverse variance weighted

 Maximum likelihood

MR Egger

Weighted median

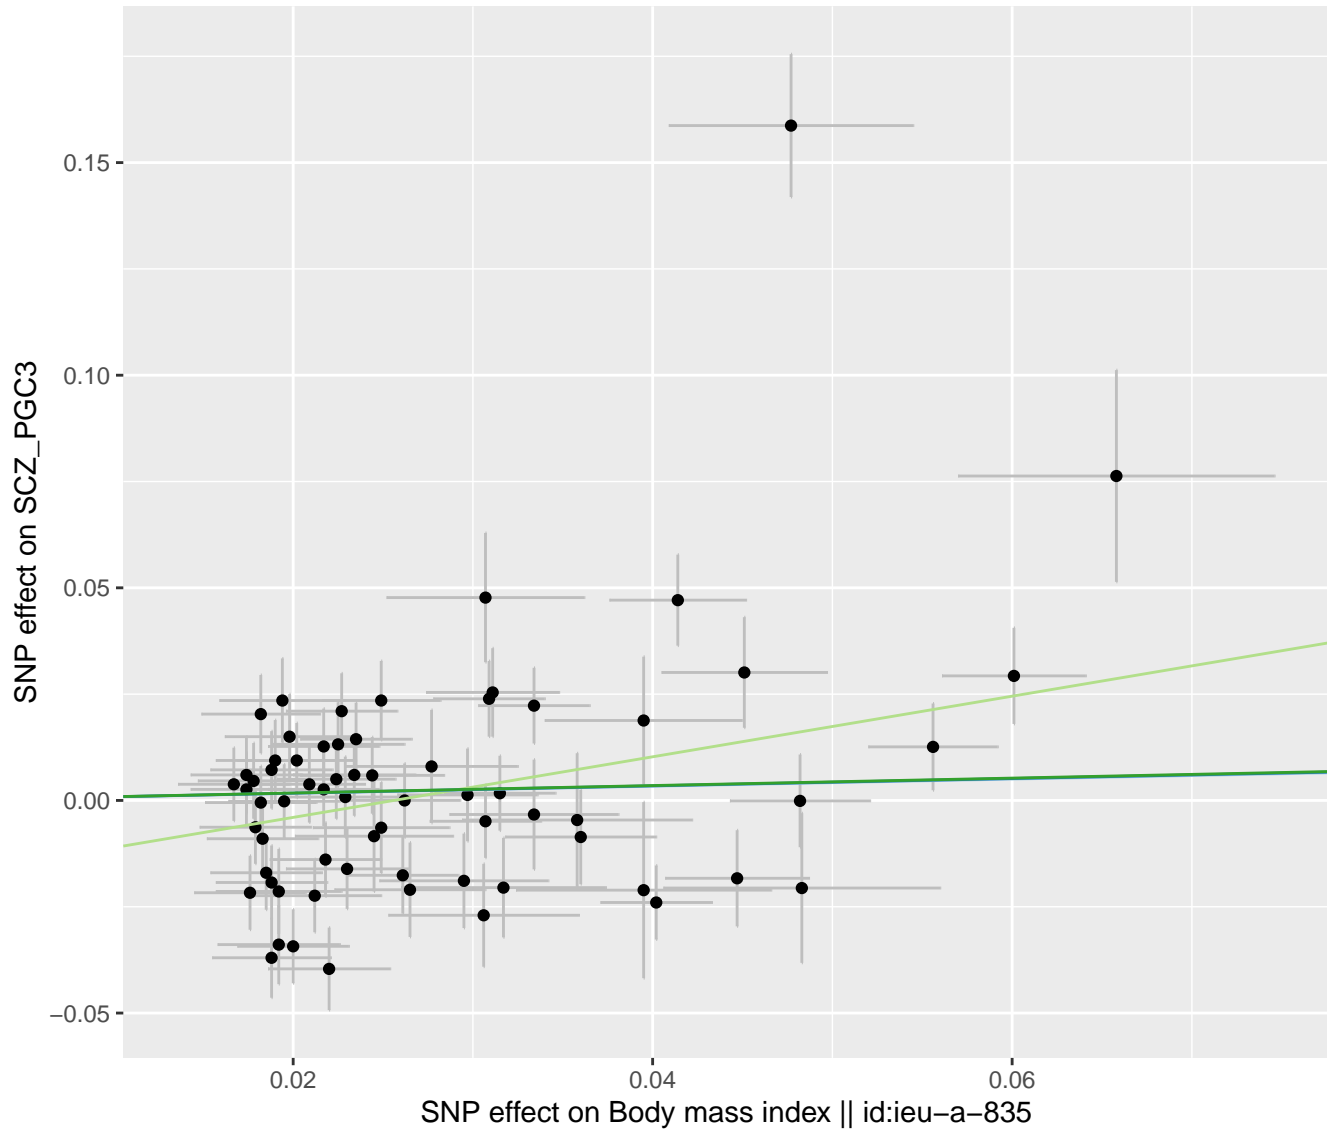

# MR Test

- Inverse variance weighted
- Maximum likelihood
- MR Egger
- Weighted median

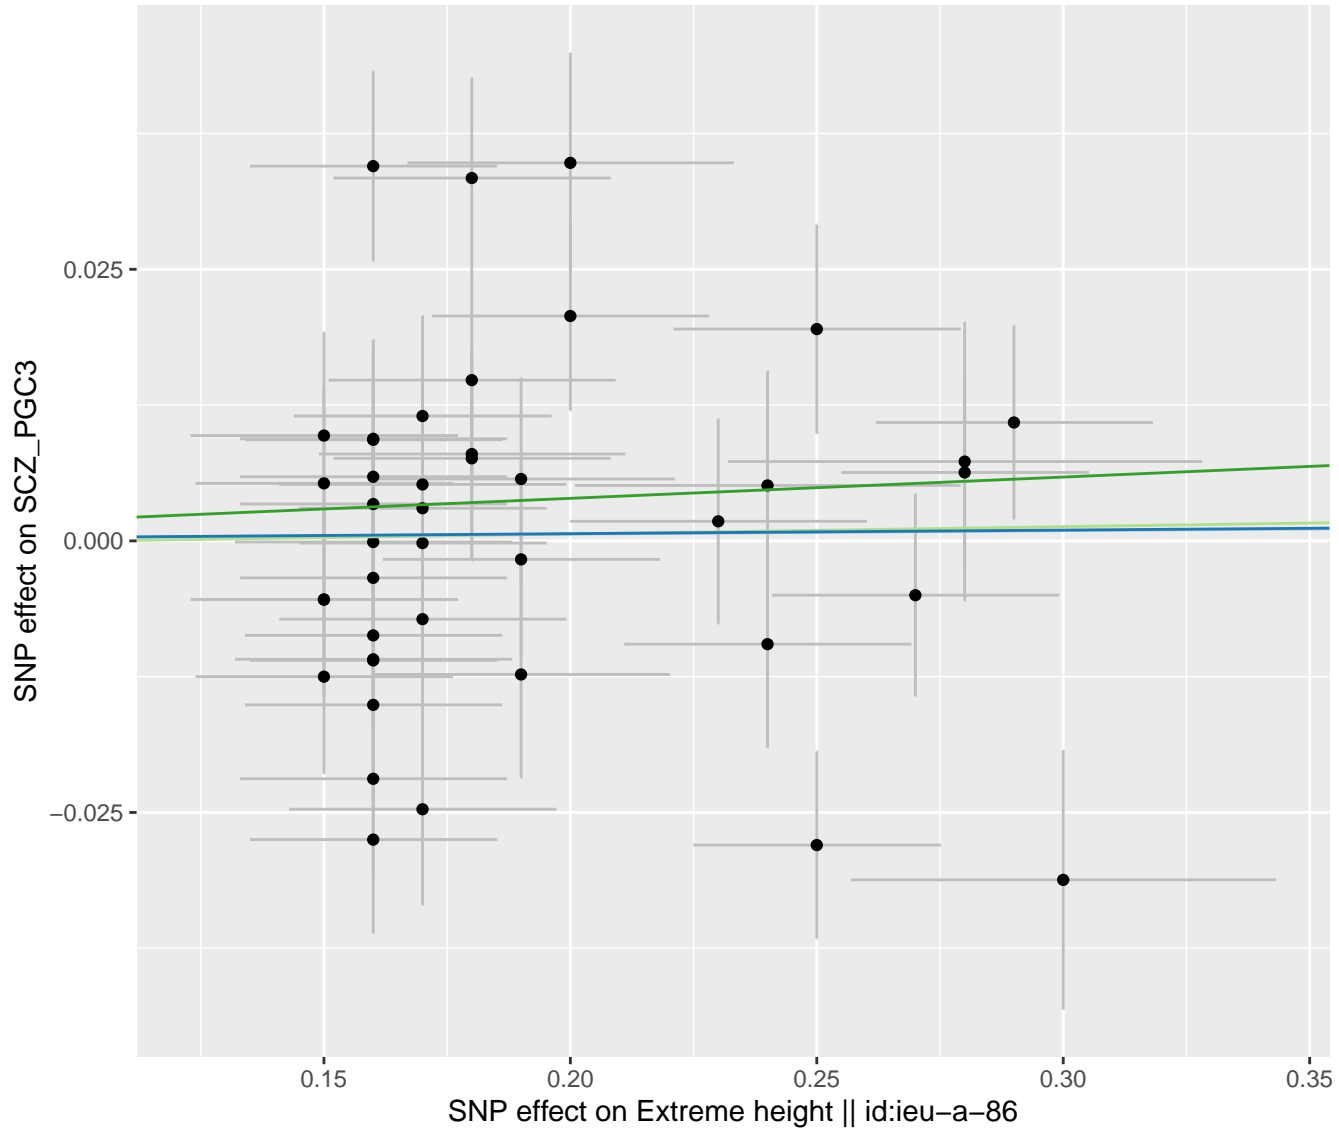

# MR Test

- Inverse variance weighted
- Maximum likelihood
- MR Egger
- Weighted median

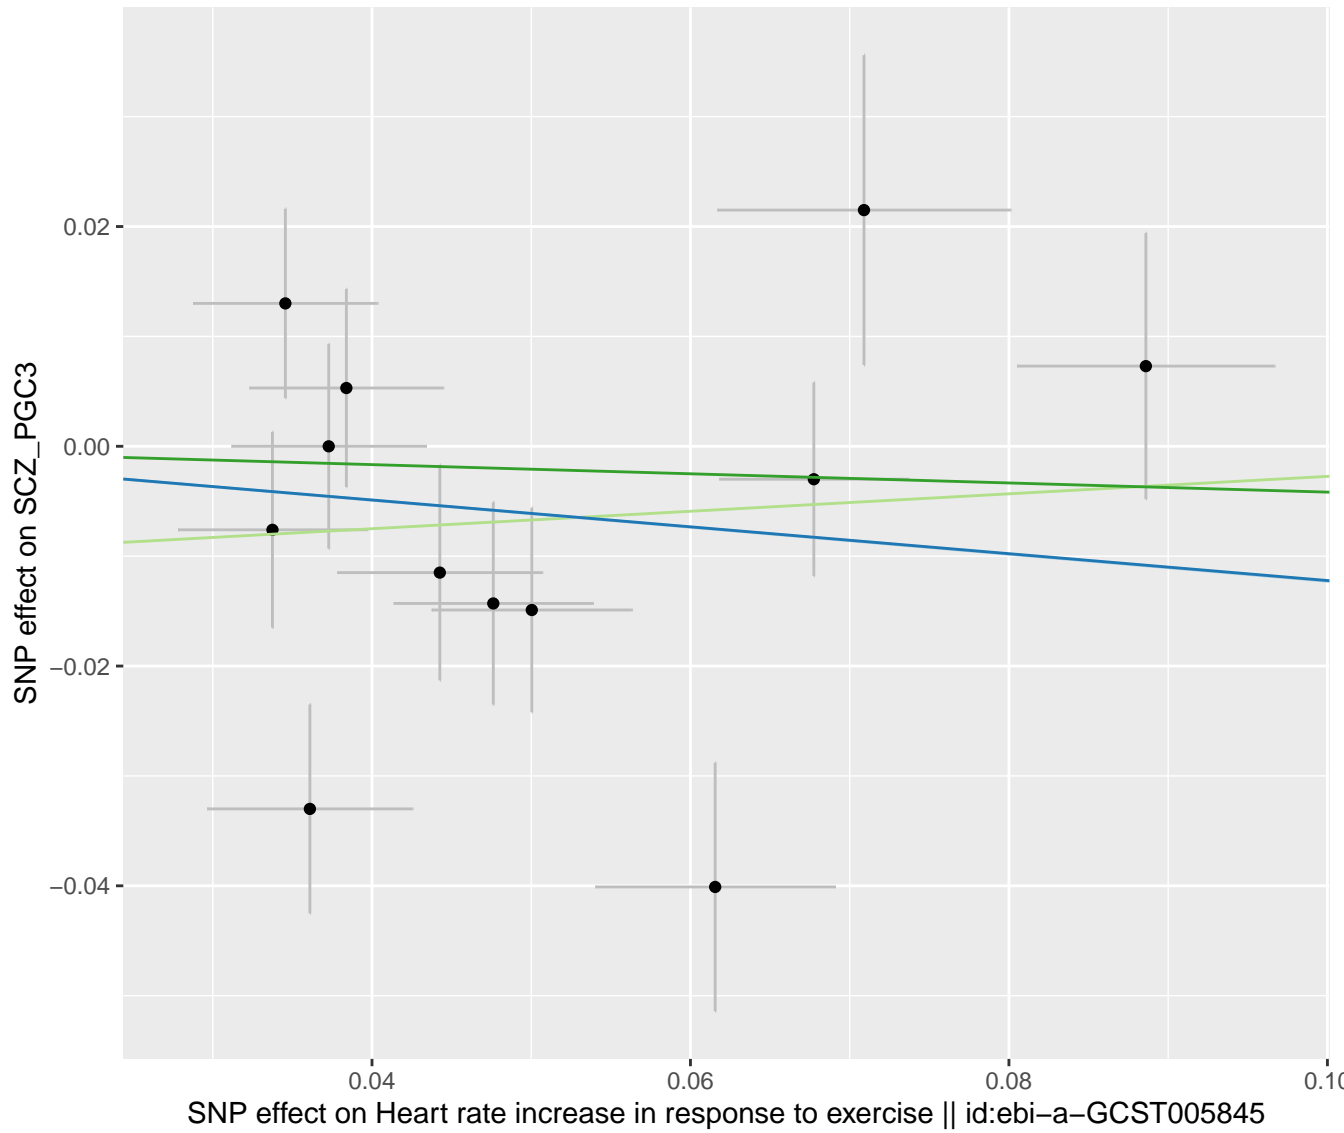

# MR Test

- Inverse variance weighted
- Maximum likelihood
- MR Egger
- Weighted median

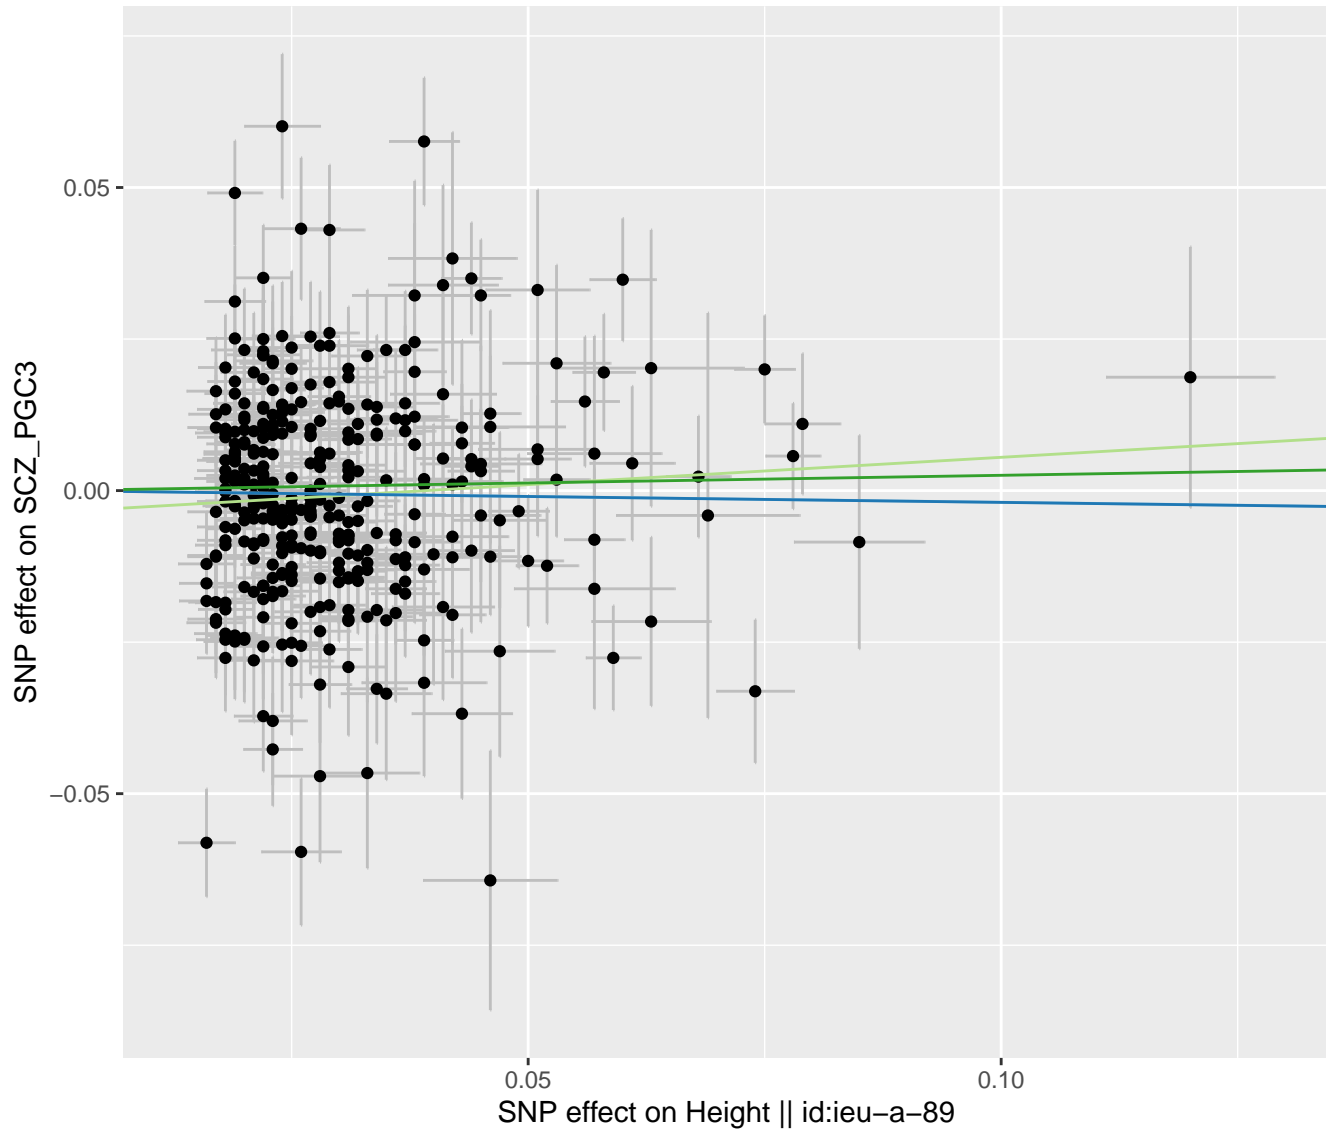

# MR Test

- Inverse variance weighted
- Maximum likelihood
- MR Egger
- Weighted median

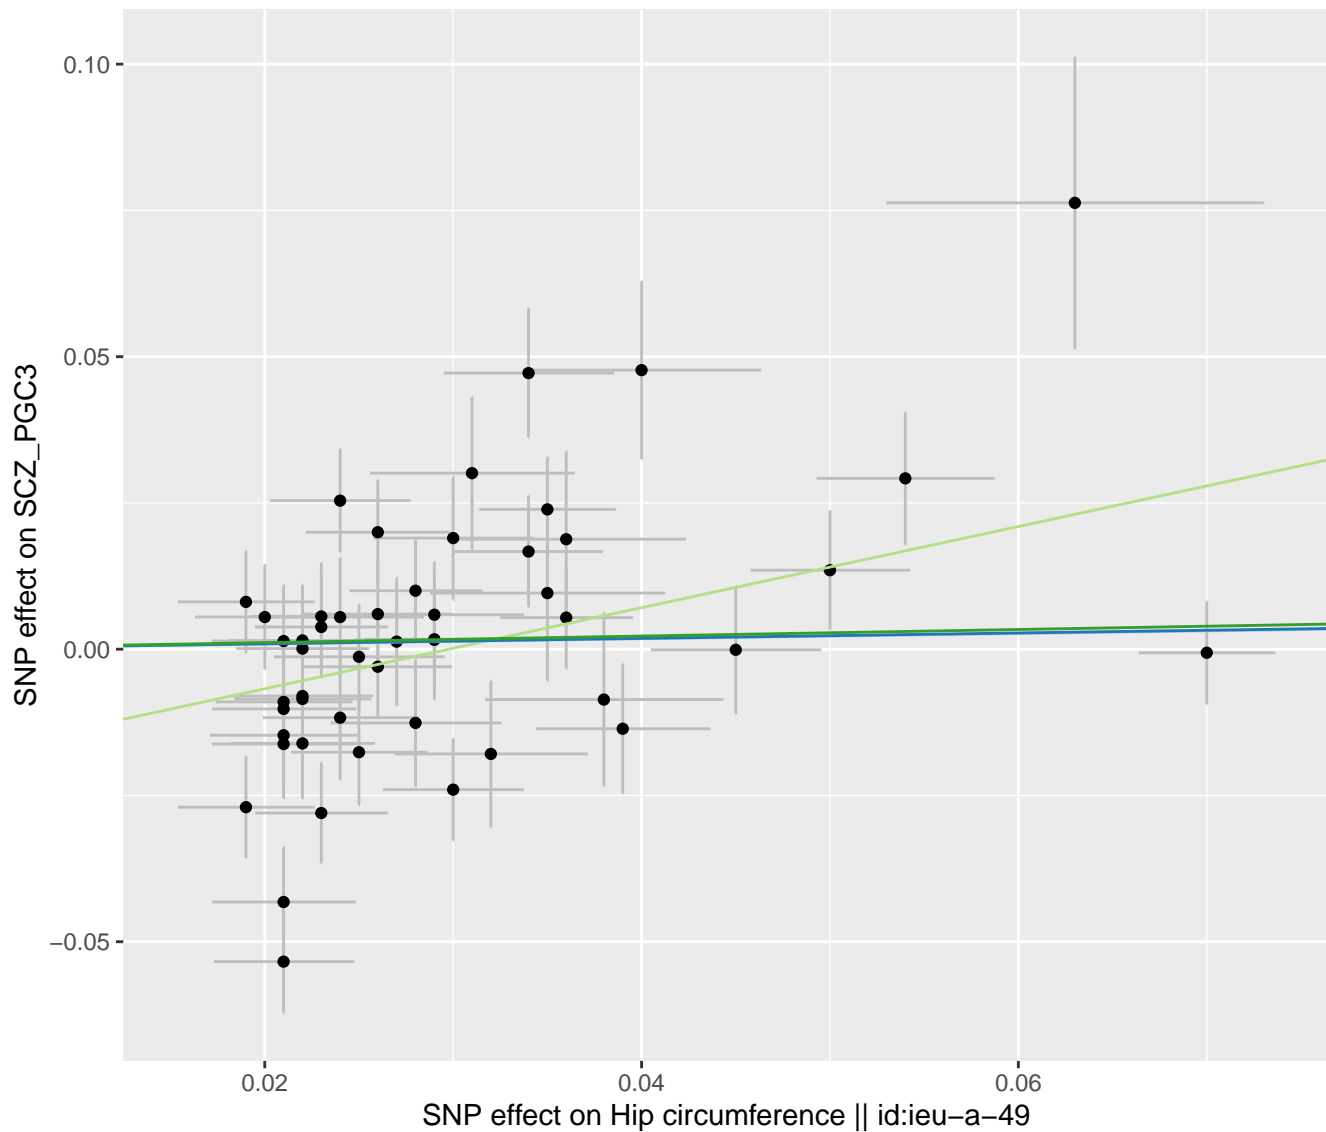

# MR Test

- Inverse variance weighted
- Maximum likelihood
- MR Egger
- Weighted median

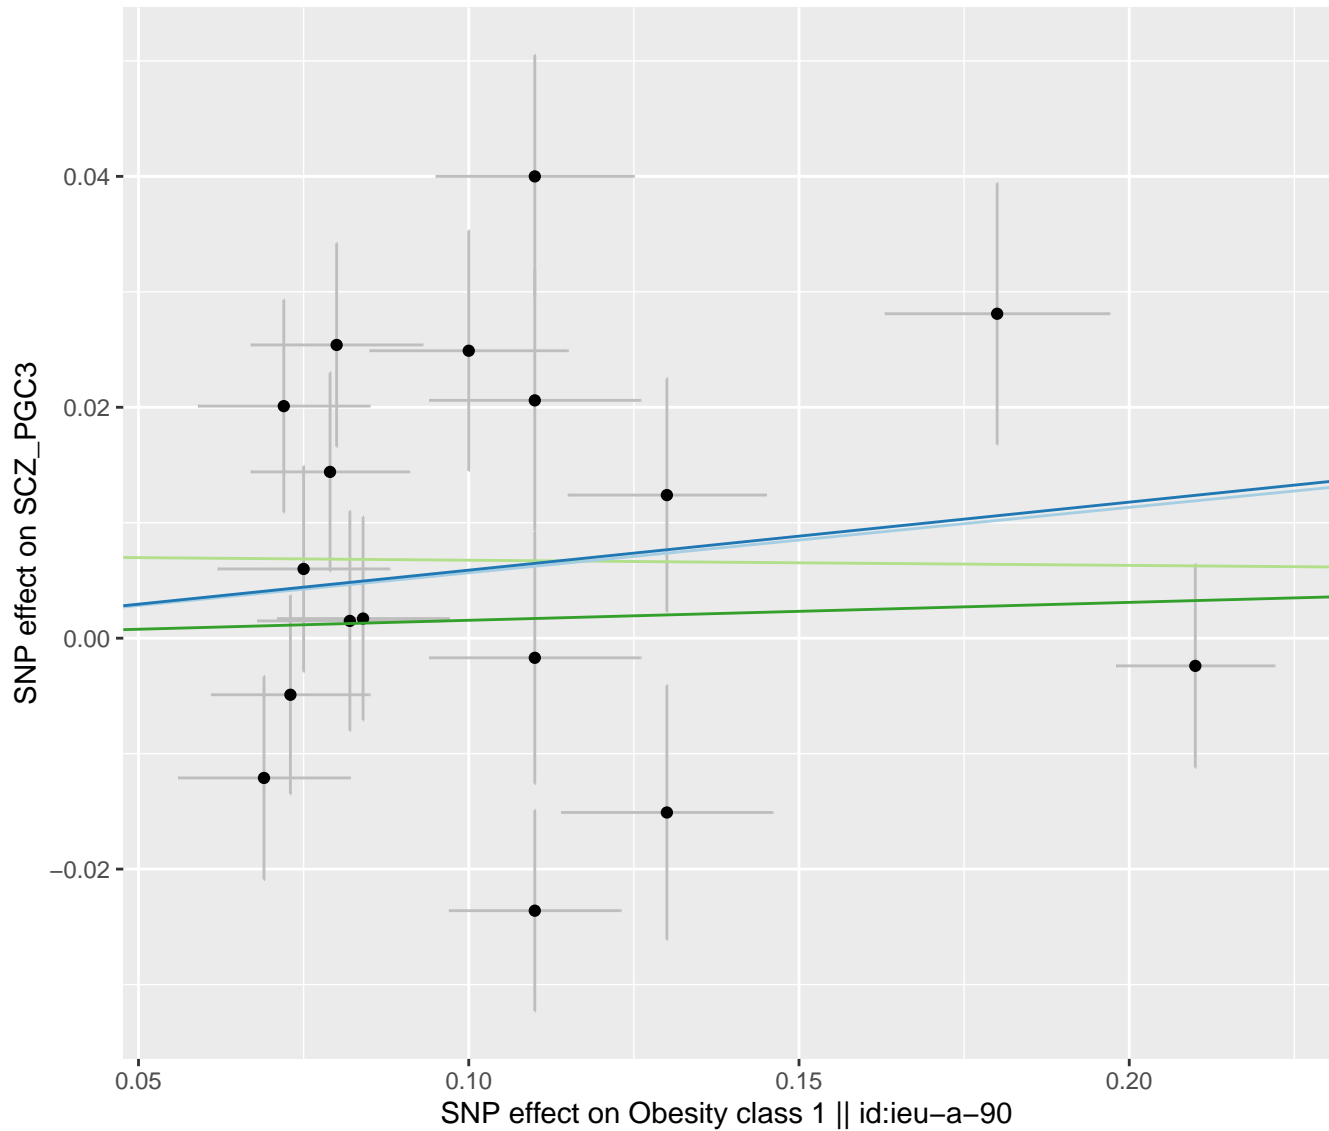

# MR Test

- Inverse variance weighted
- Maximum likelihood
- MR Egger
- Weighted median

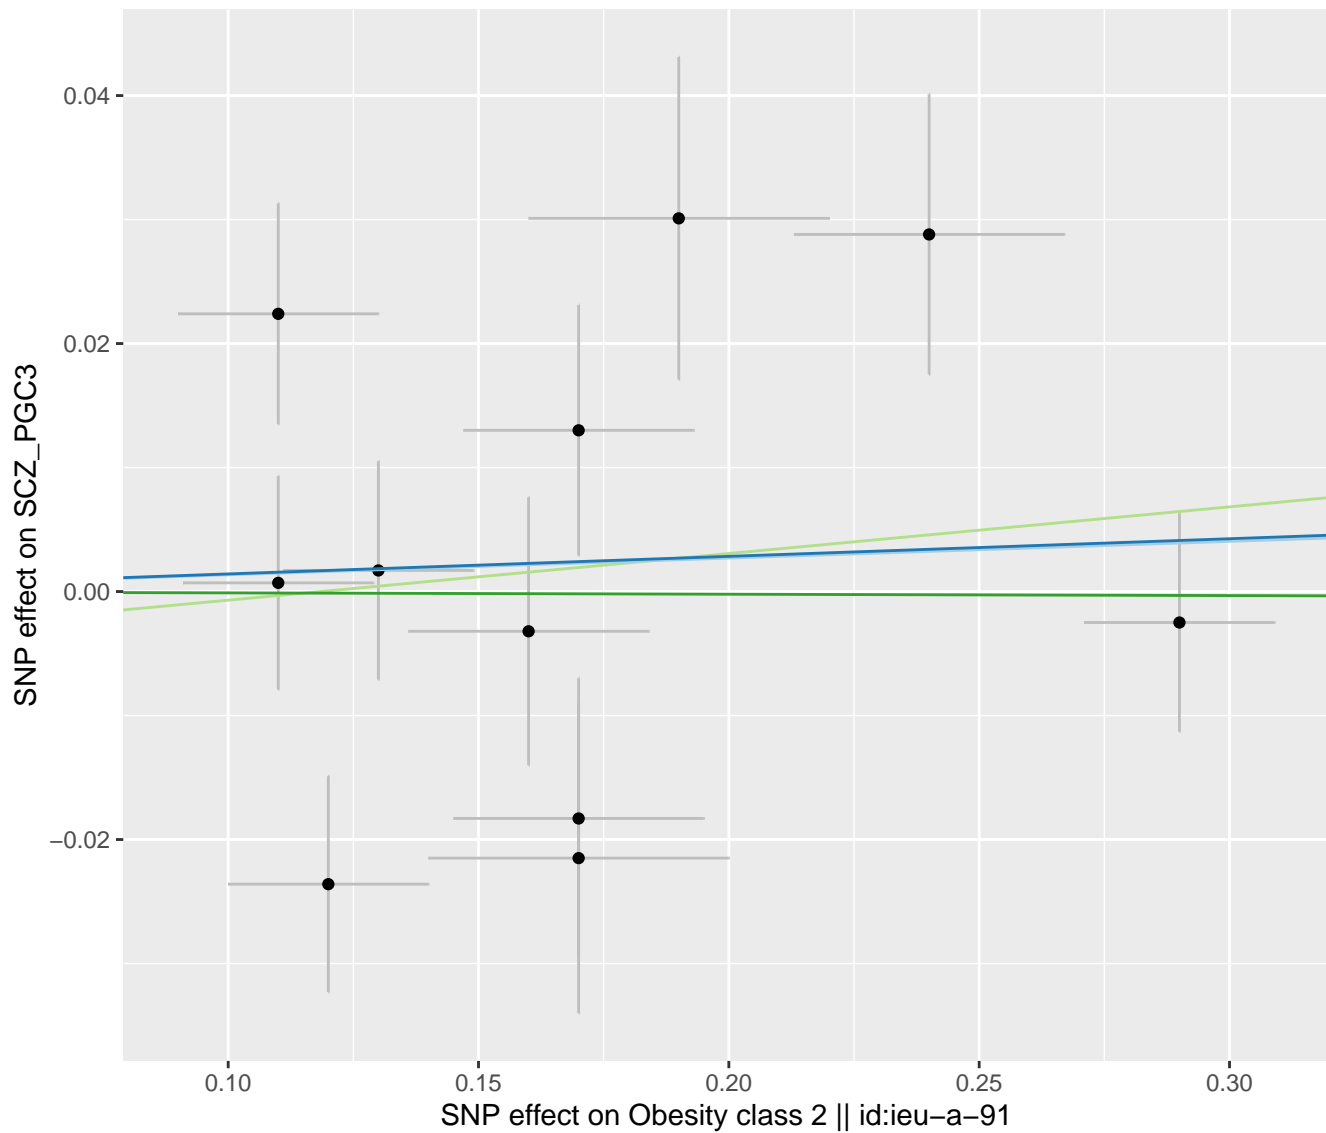



# MR Test

- Inverse variance weighted
- Maximum likelihood
- MR Egger
- Weighted median

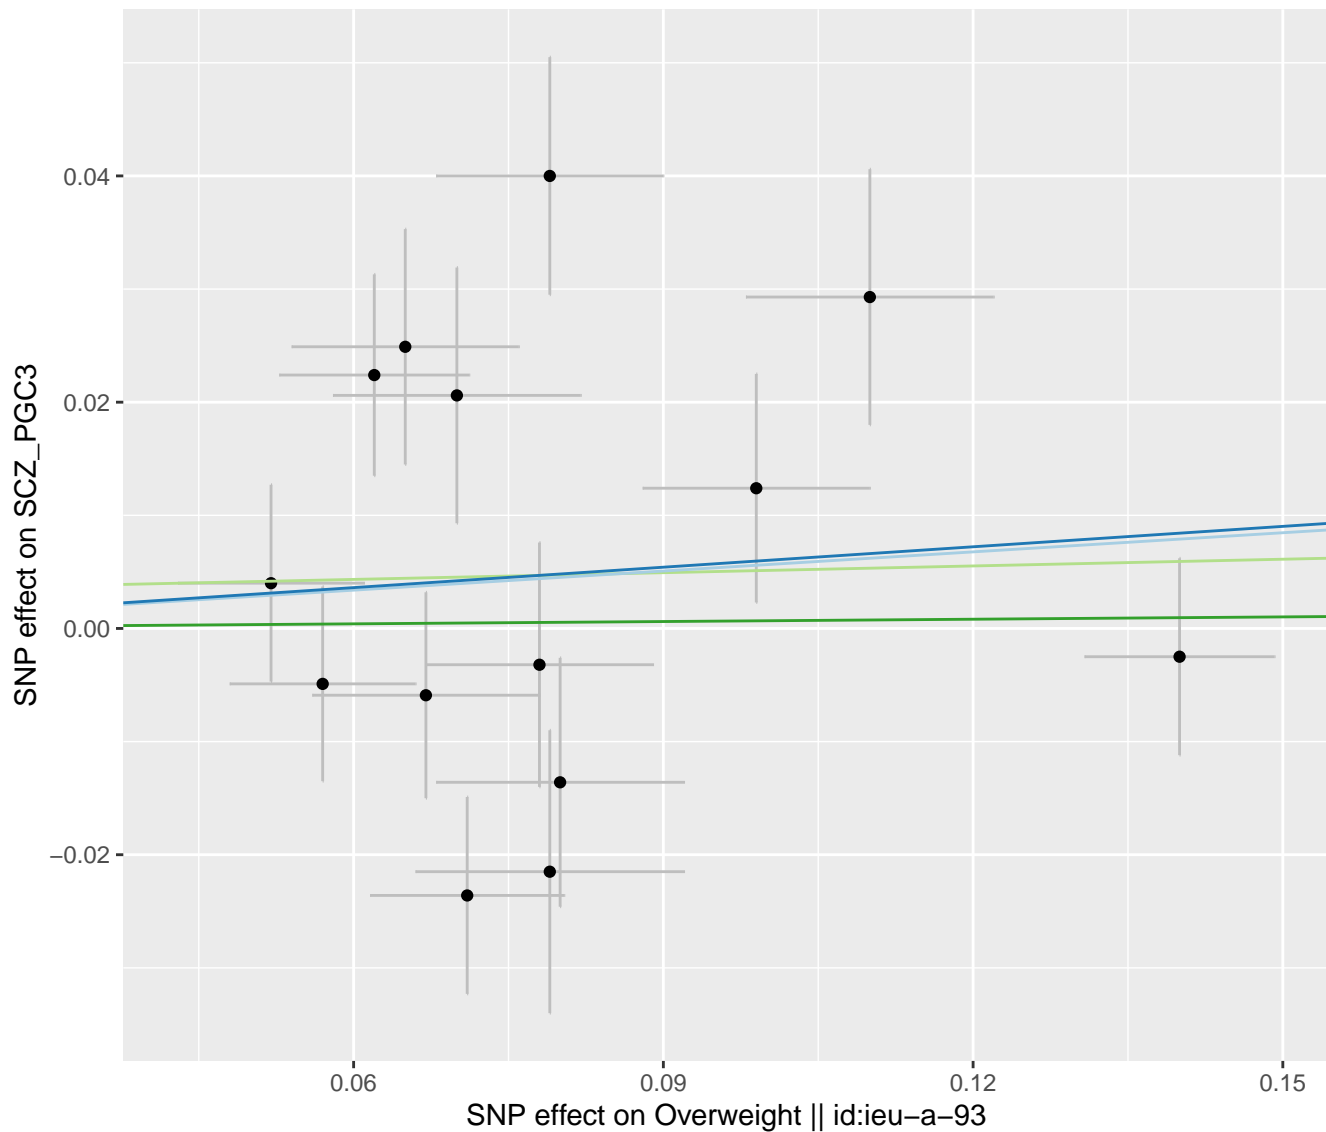

# MR Test

- Inverse variance weighted
- Maximum likelihood
- MR Egger
- Weighted median

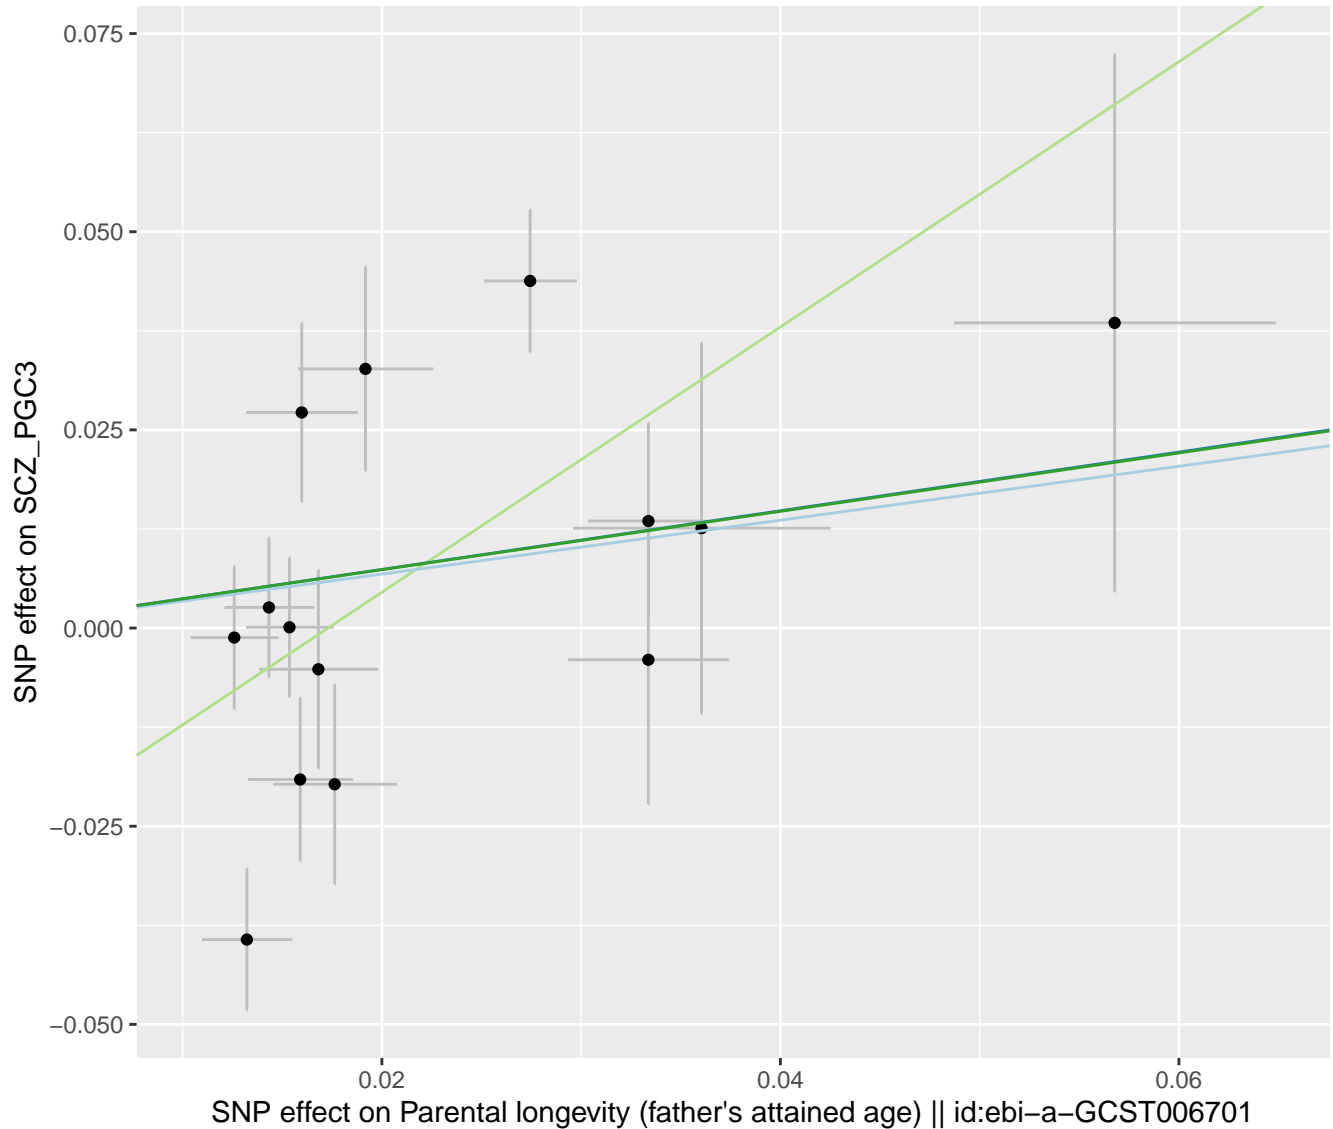

# MR Test

- Inverse variance weighted
- Maximum likelihood
- MR Egger
- Weighted median

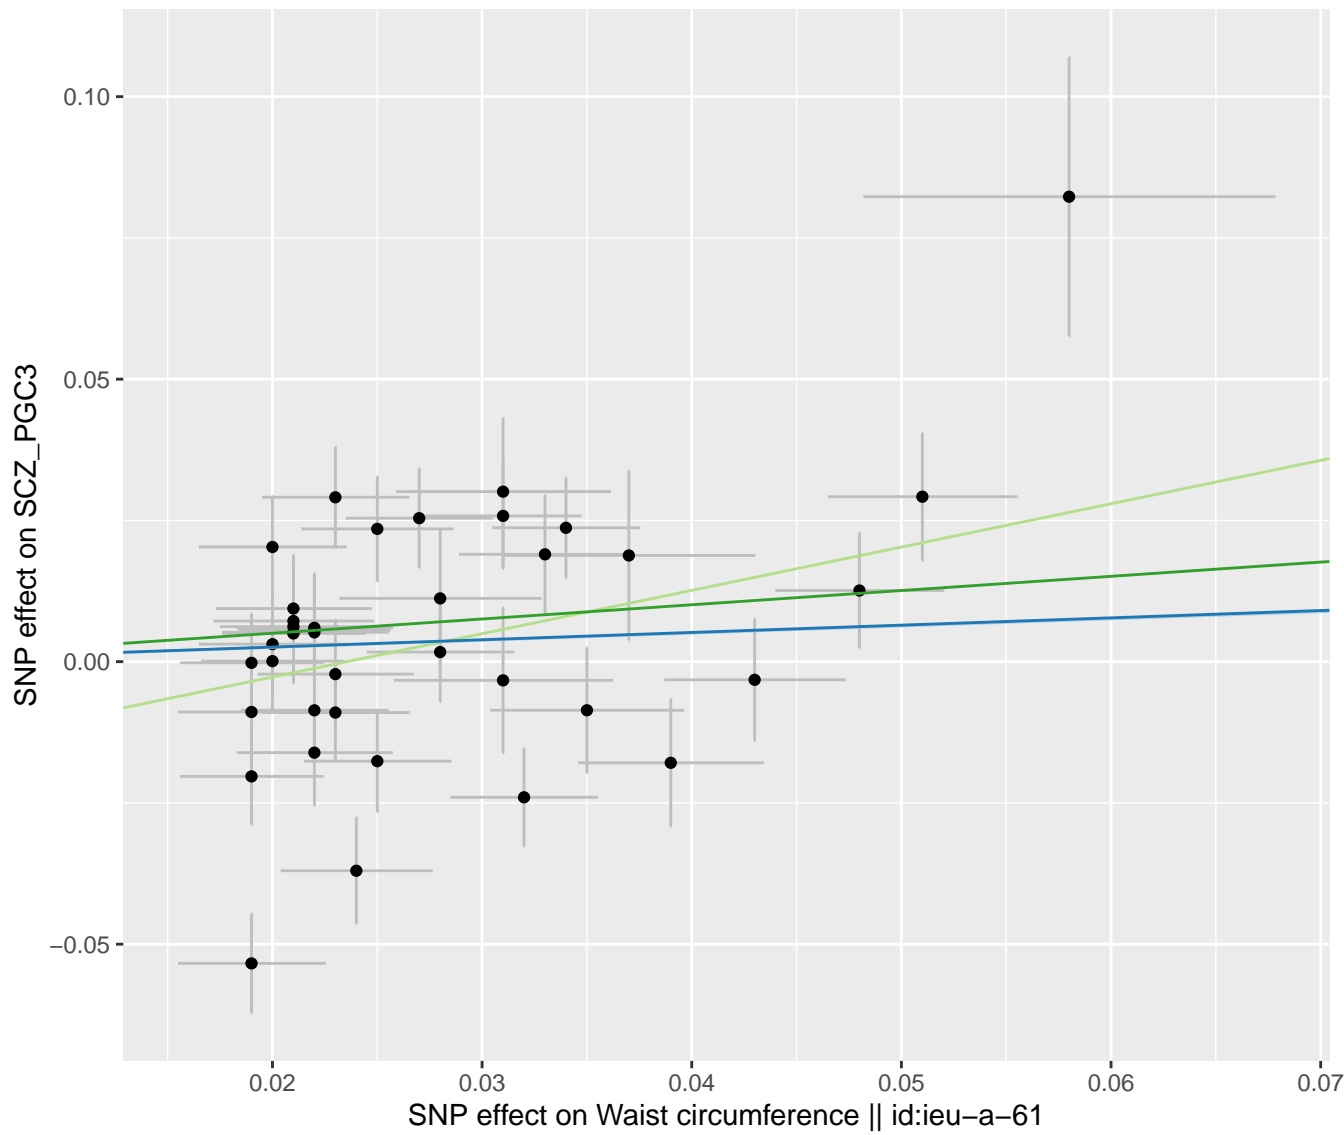

# MR Test

- Inverse variance weighted
- Maximum likelihood
- MR Egger
- Weighted median

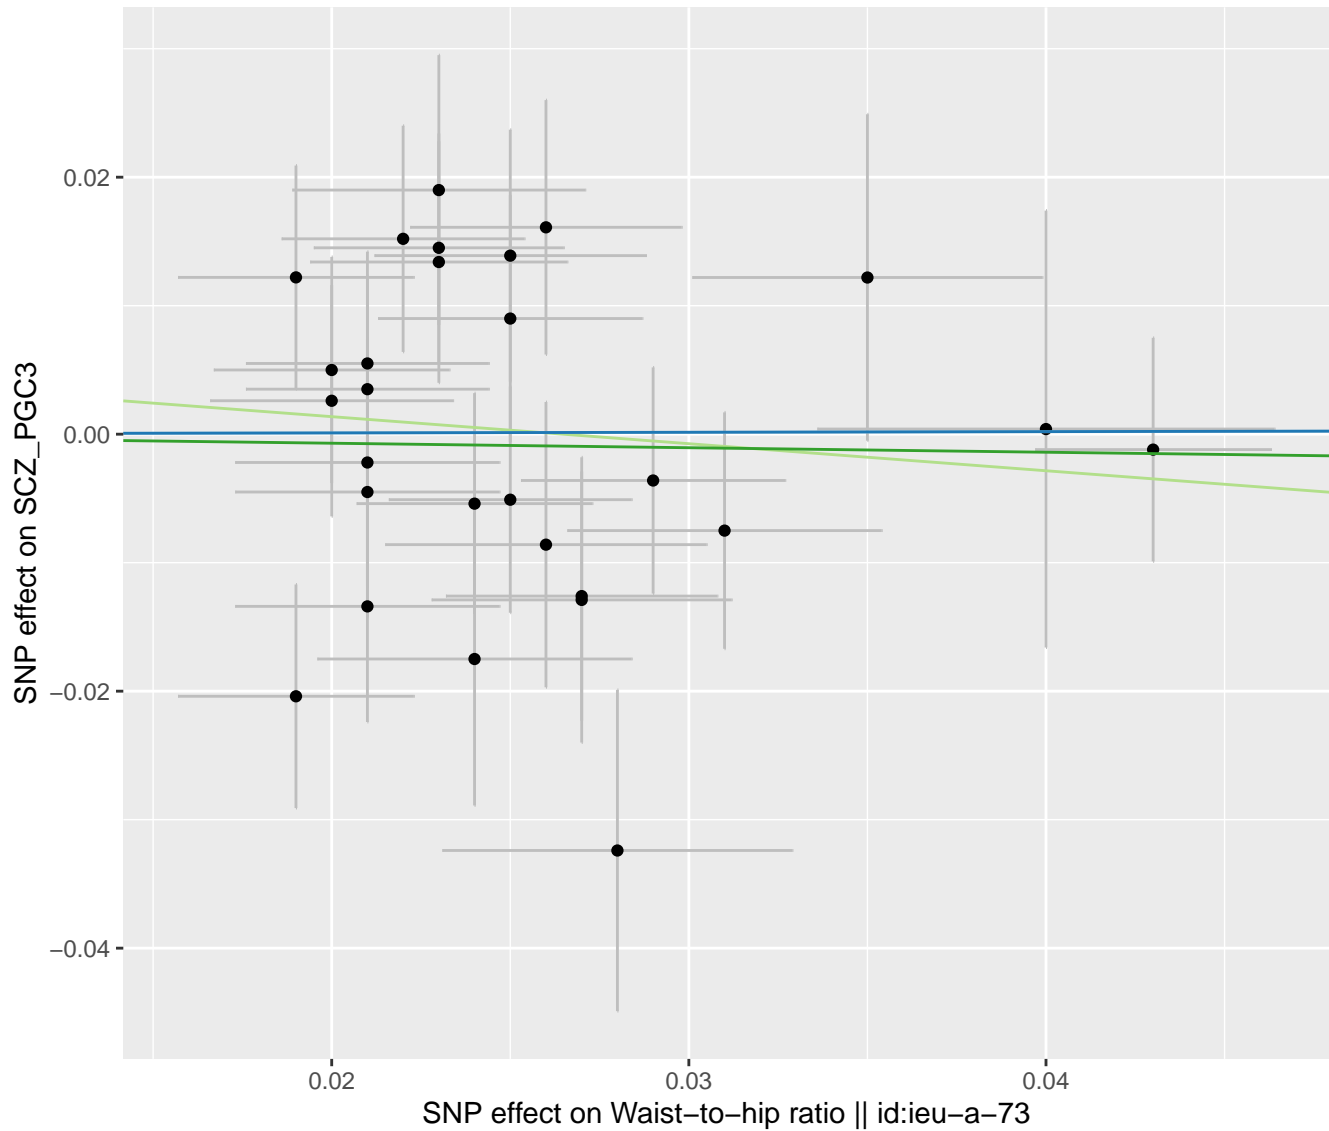

# MR Test

- Inverse variance weighted
- Maximum likelihood
- MR Egger
- Weighted median

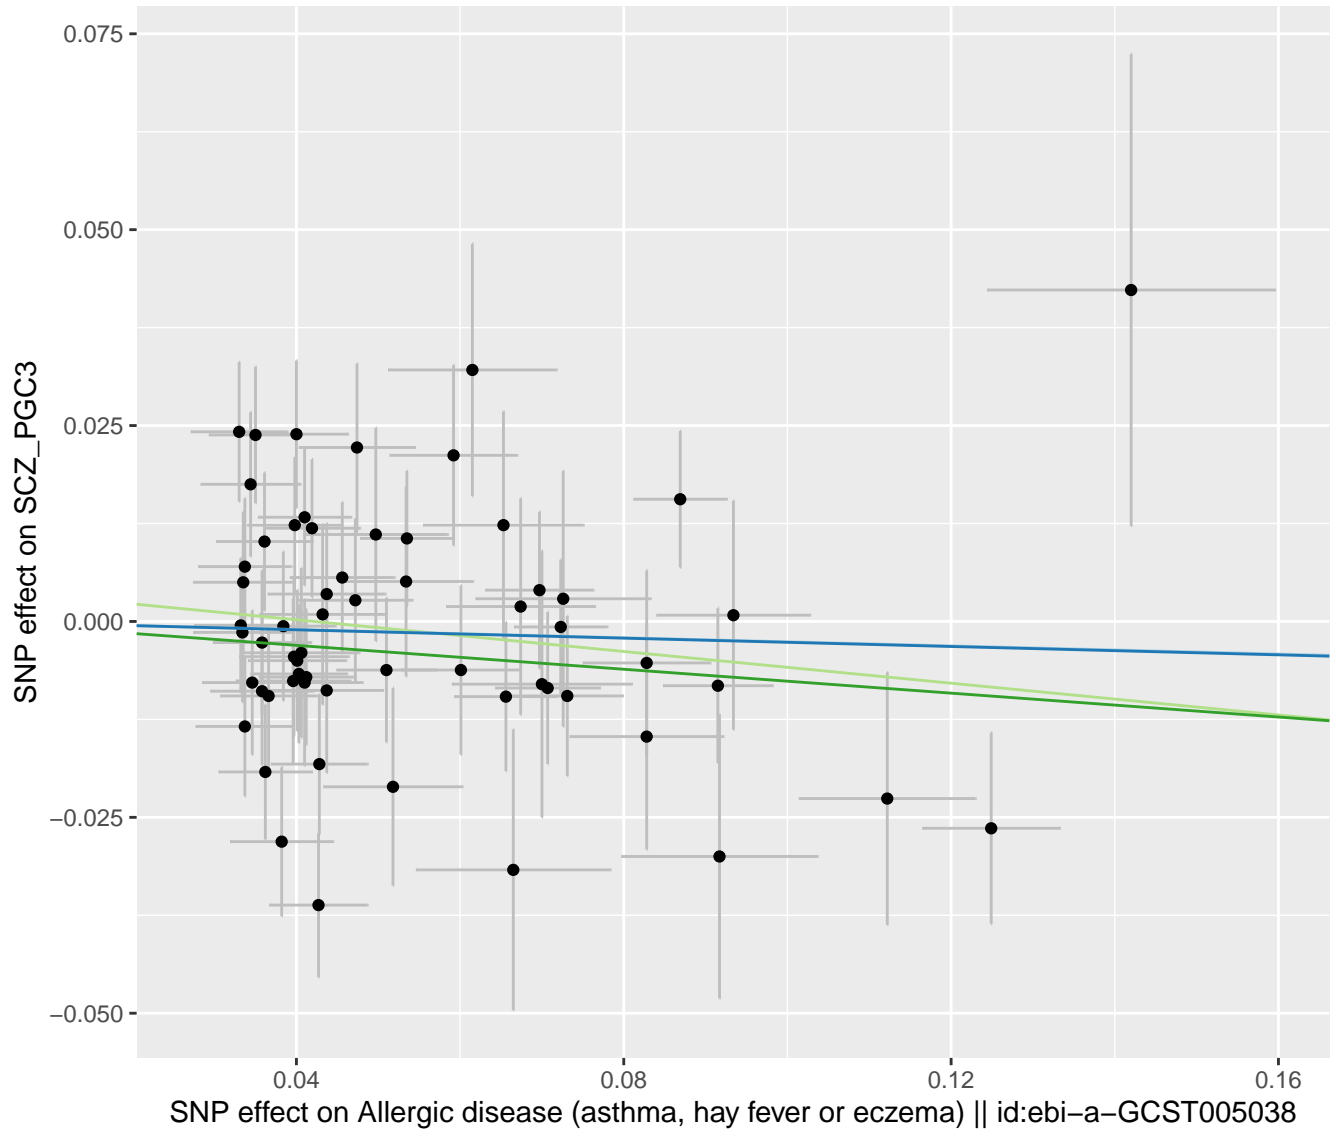

# MR Test

- Inverse variance weighted
- Maximum likelihood
- MR Egger
- Weighted median

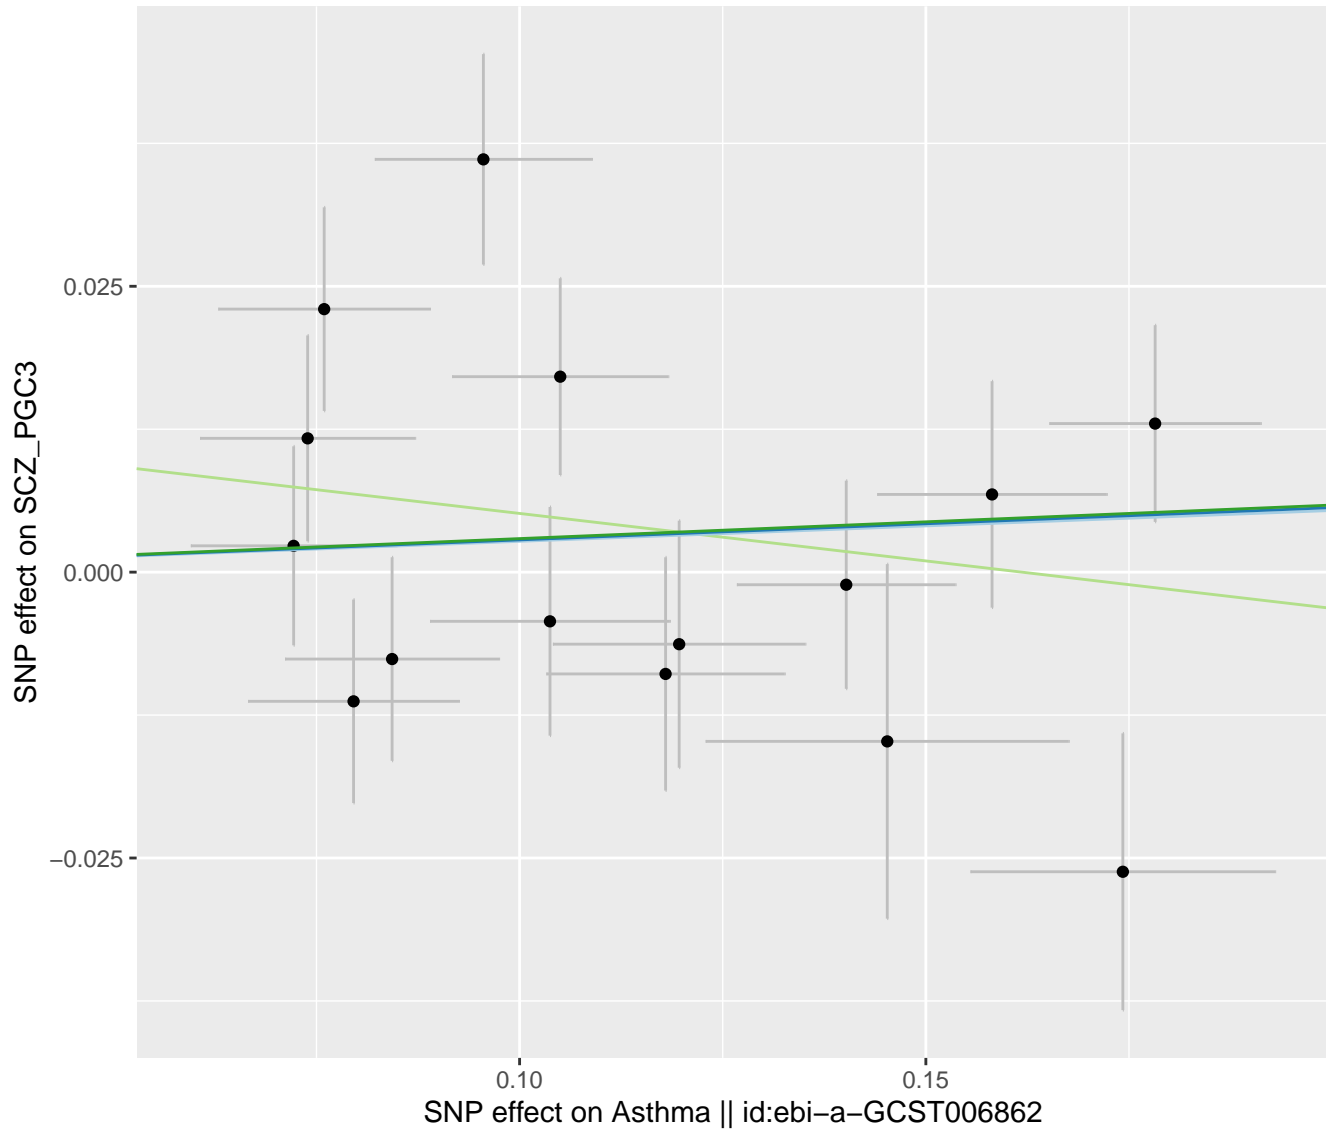

# MR Test

- Inverse variance weighted
- Maximum likelihood
- MR Egger
- Weighted median

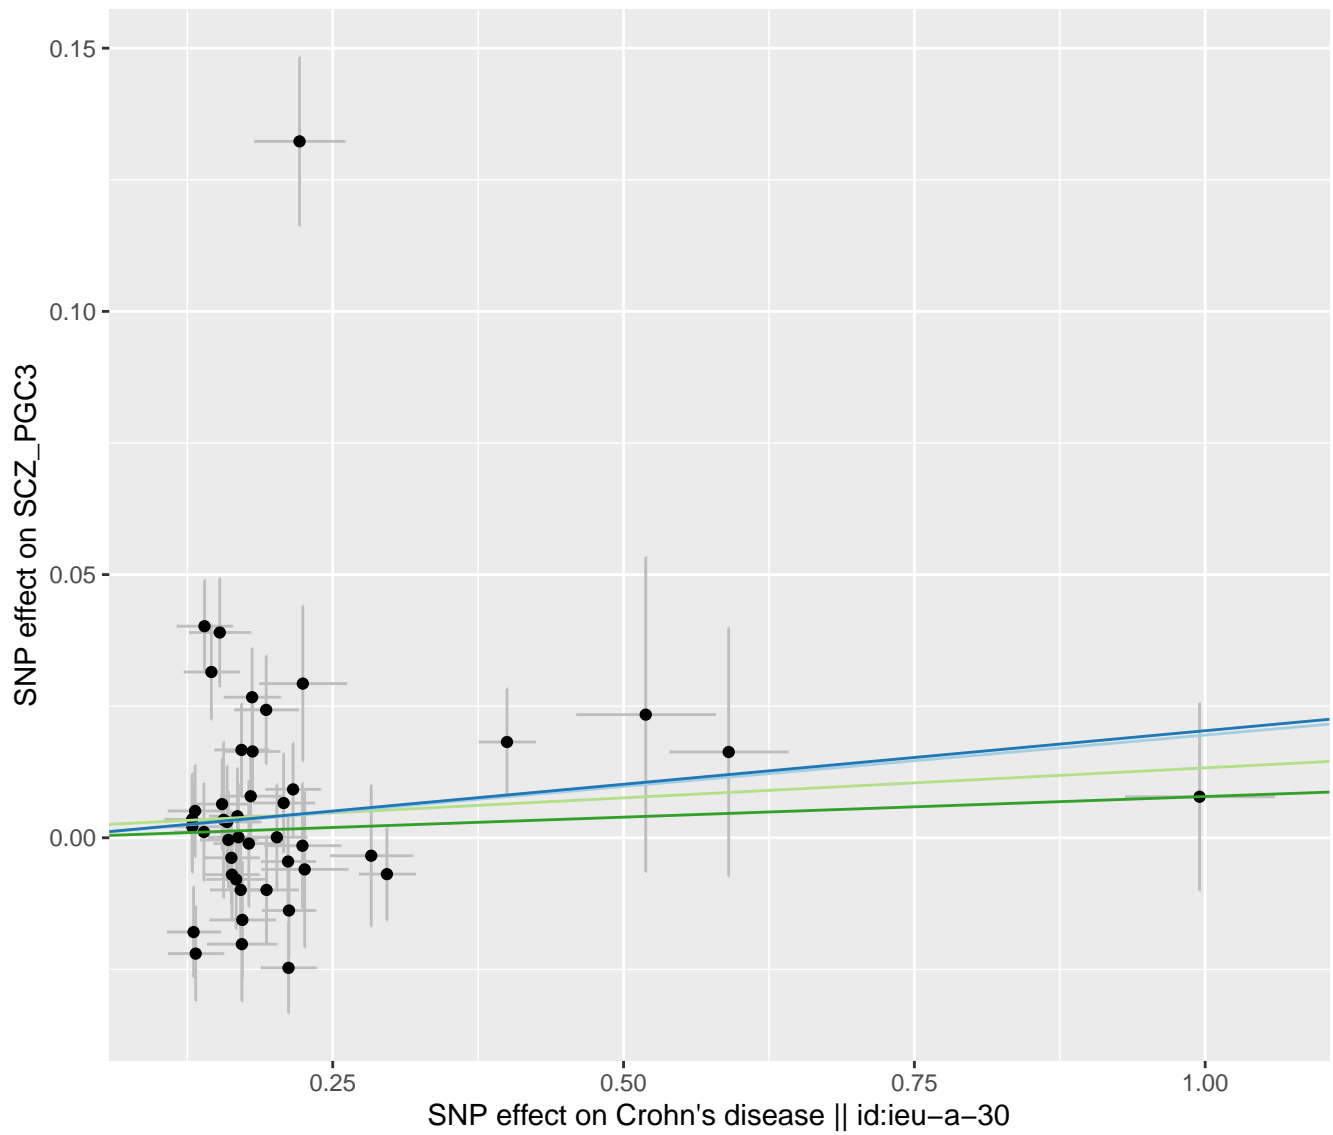

# MR Test

- Inverse variance weighted
- Maximum likelihood
- MR Egger
- Weighted median

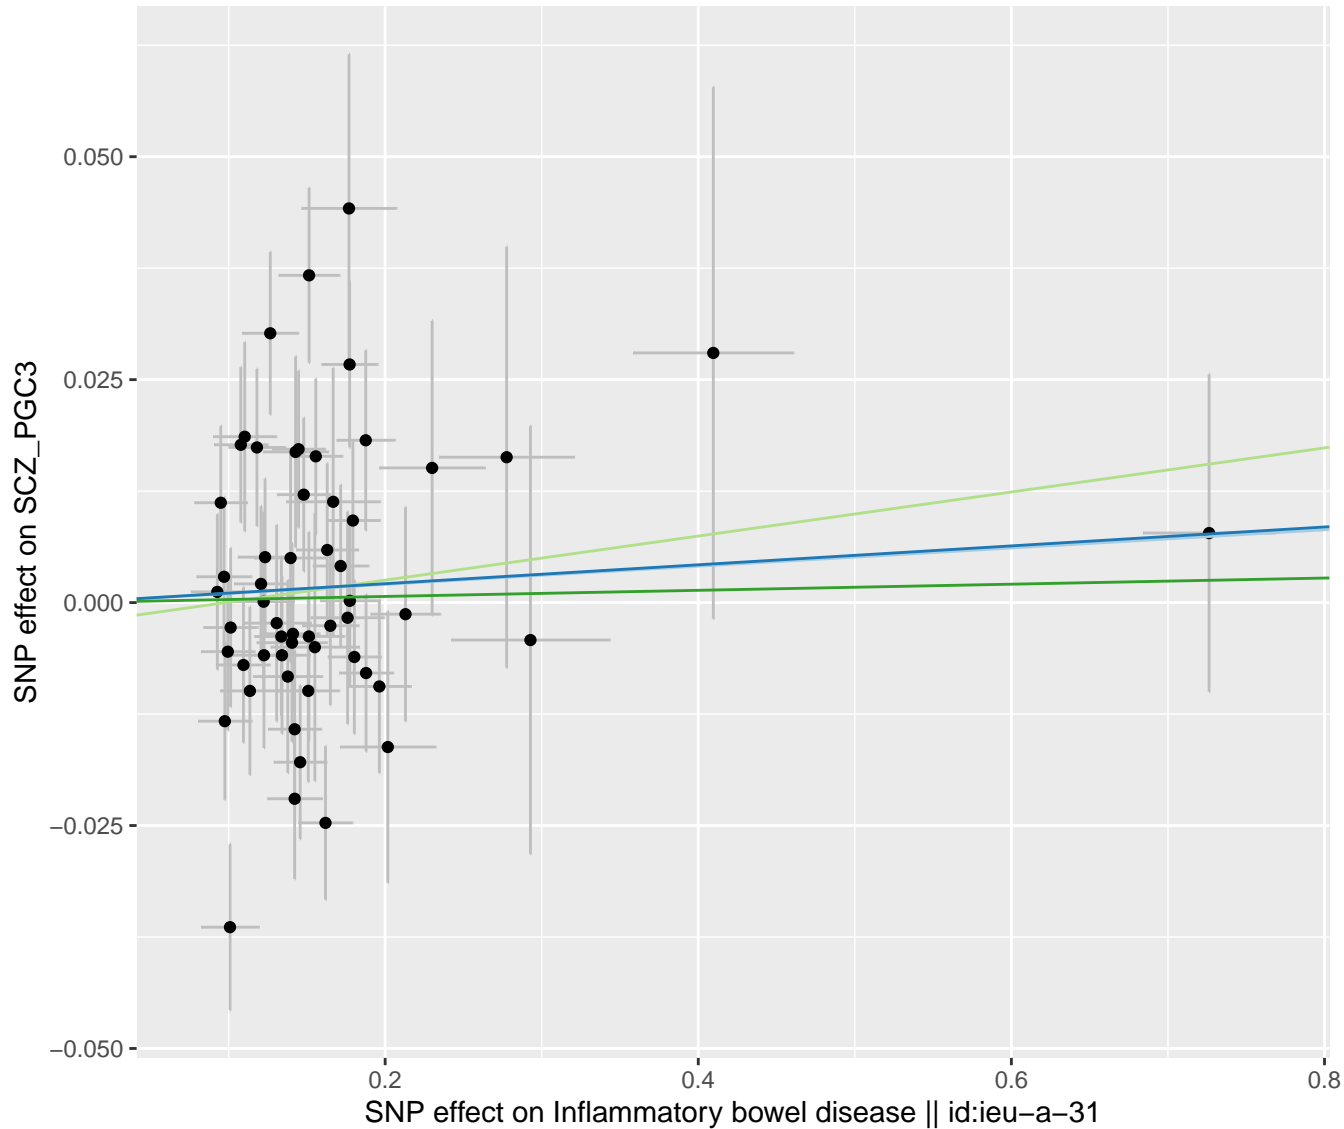



# MR Test

- Inverse variance weighted
- Maximum likelihood
- MR Egger
- Weighted median

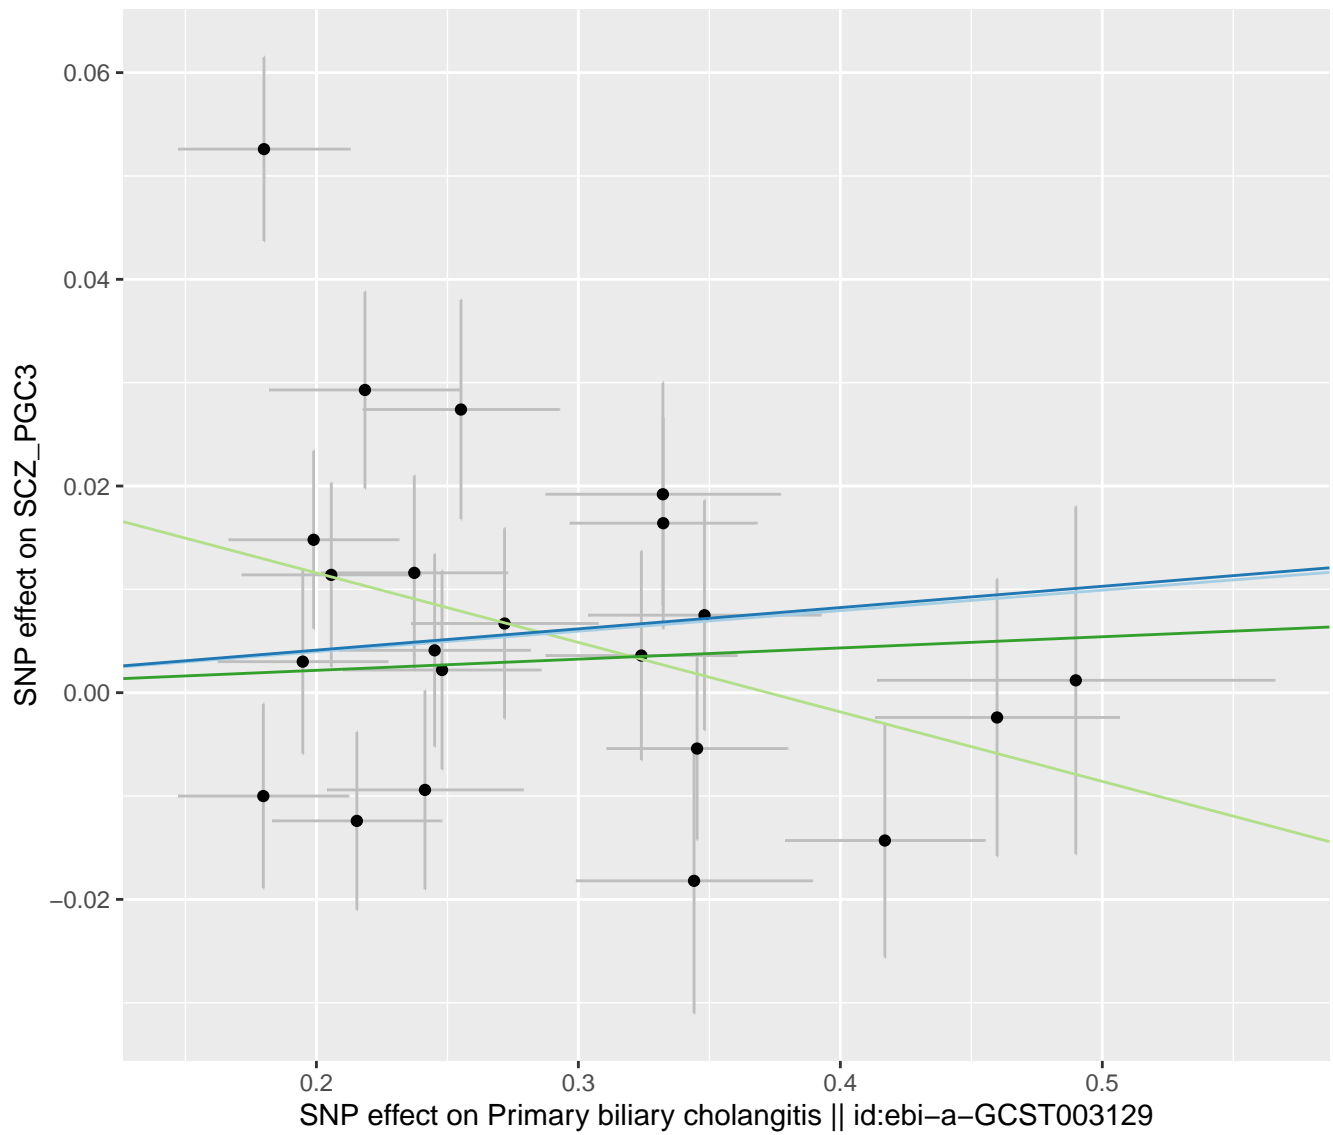

# MR Test

- Inverse variance weighted
- Maximum likelihood
- MR Egger
- Weighted median

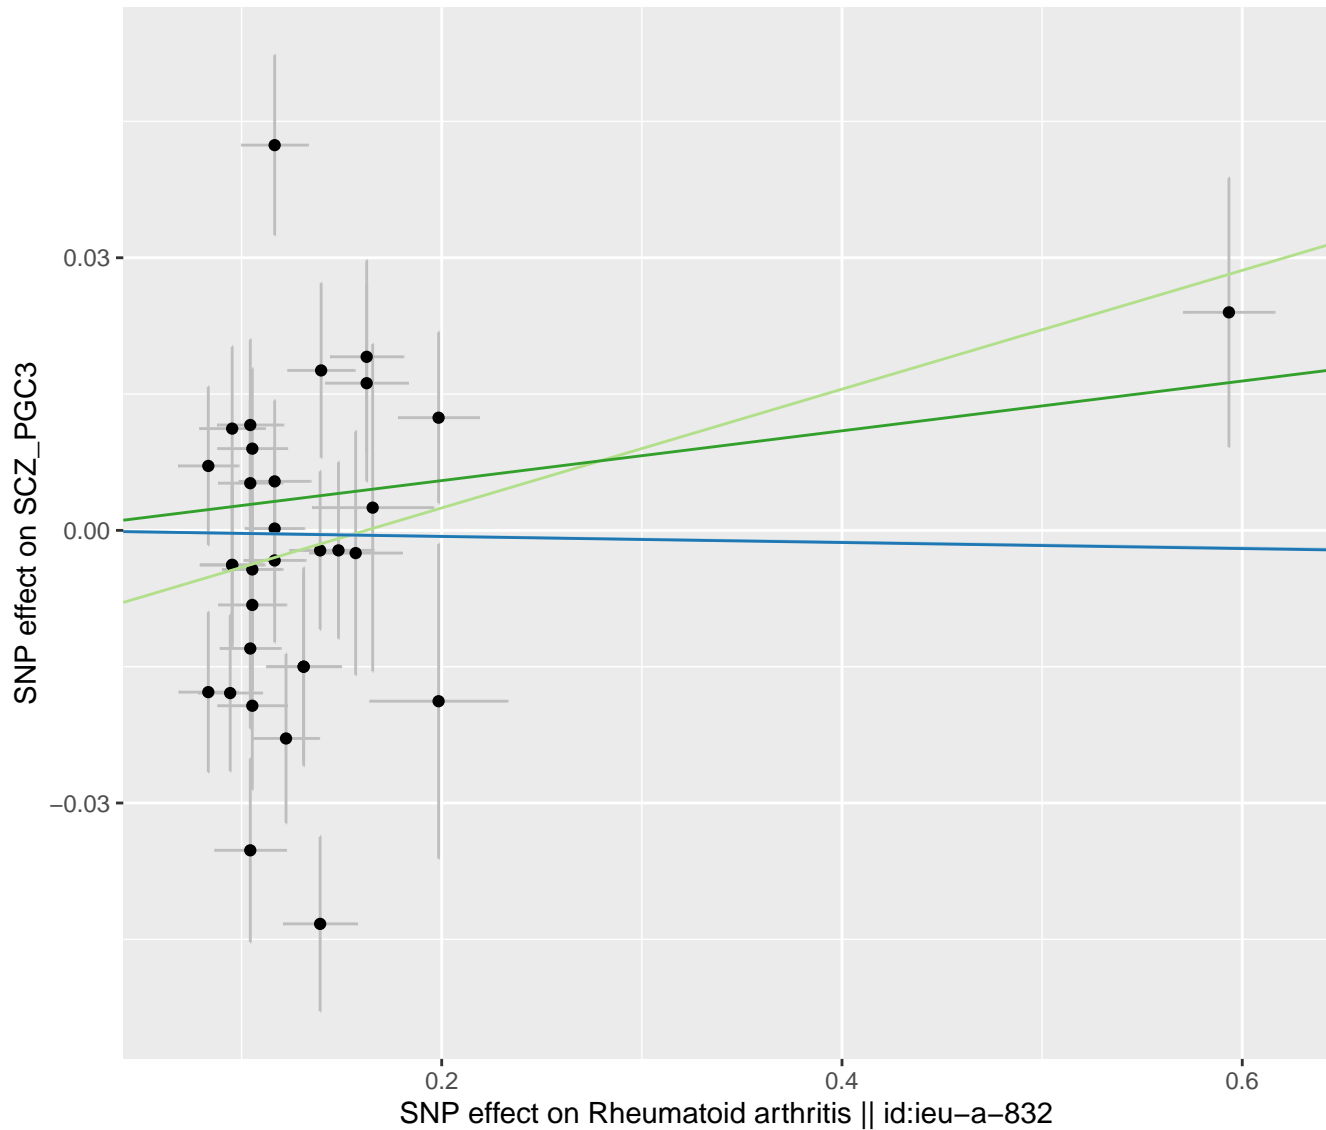

# MR Test

- Inverse variance weighted
- Maximum likelihood
- MR Egger
- Weighted median

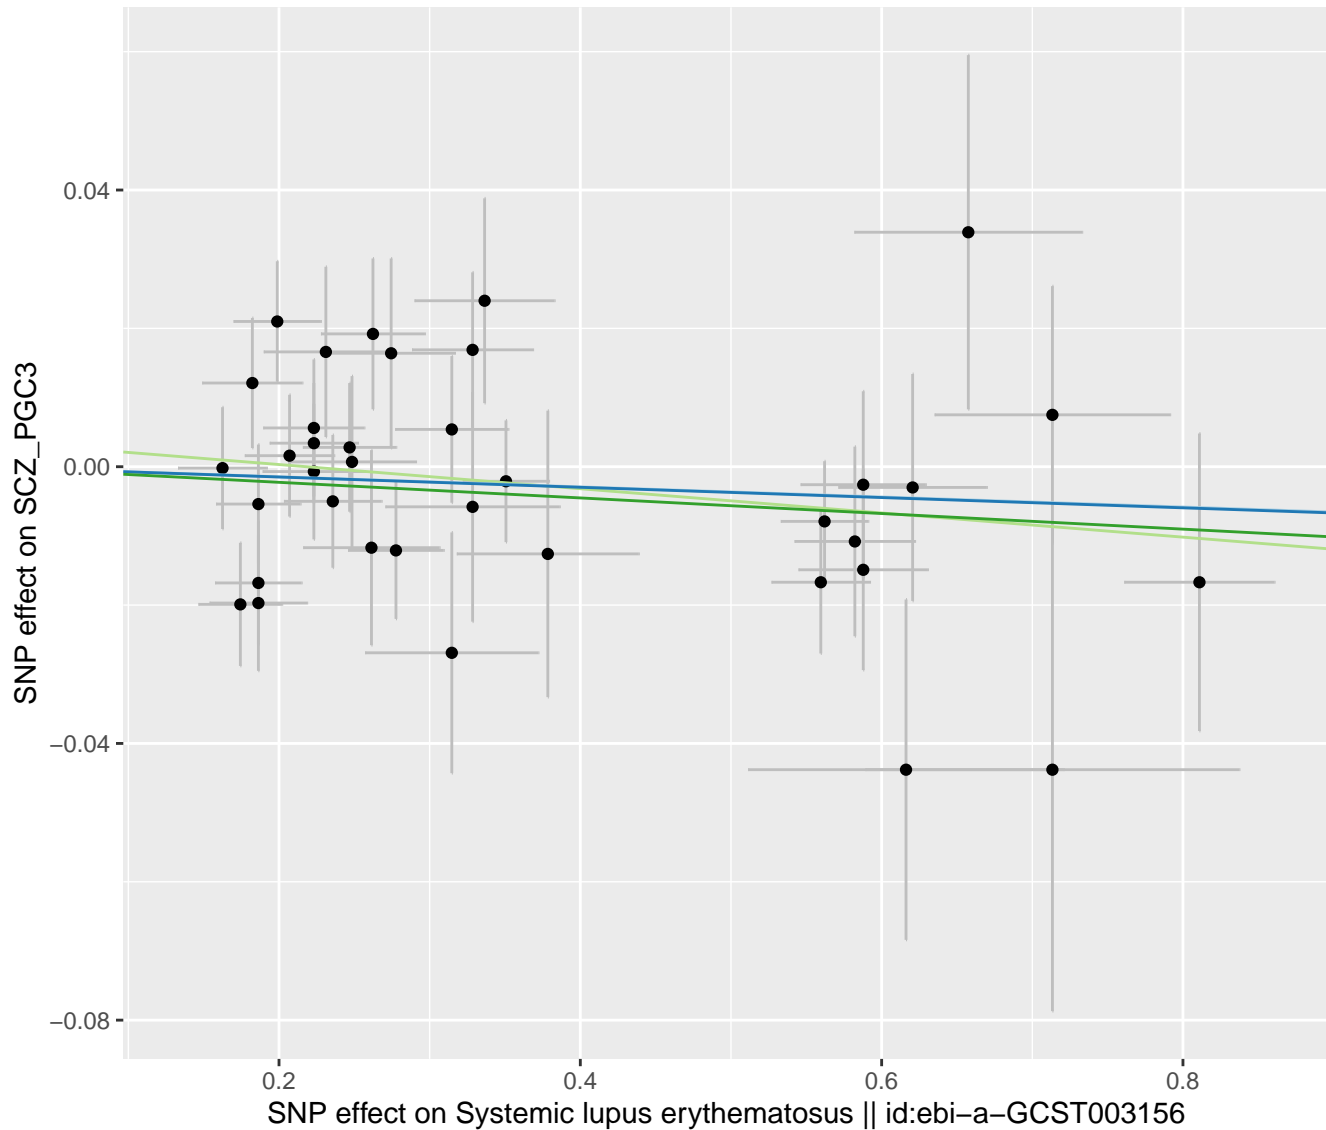

# MR Test

- Inverse variance weighted
- Maximum likelihood
- MR Egger
- Weighted median

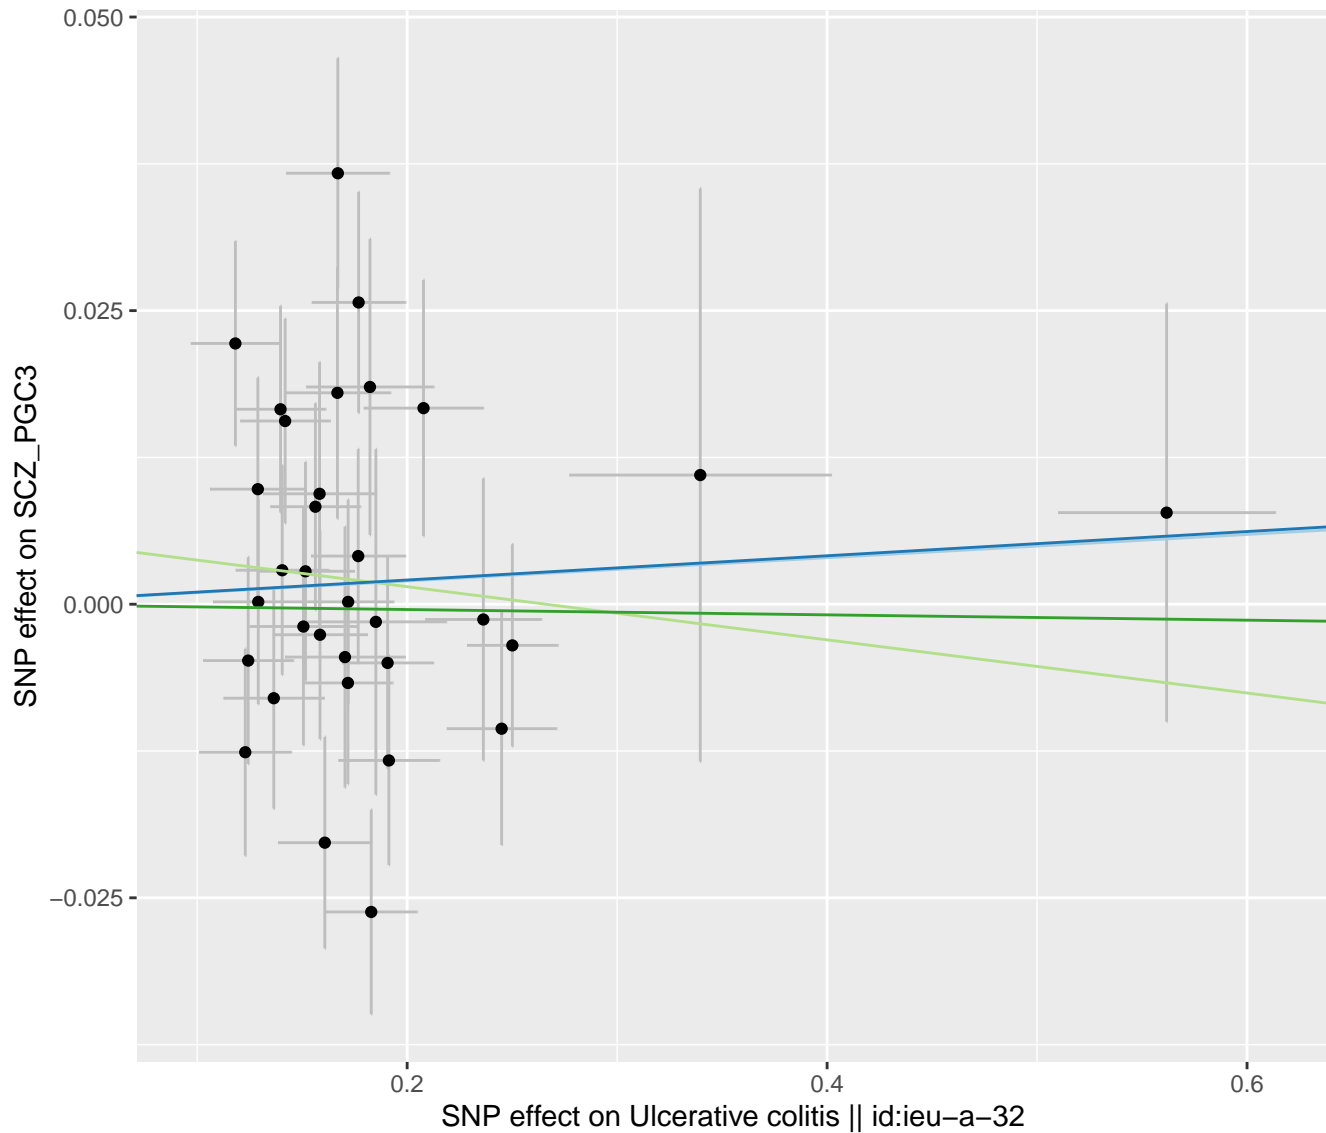

# MR Test

- Inverse variance weighted
- Maximum likelihood
- MR Egger
- Weighted median

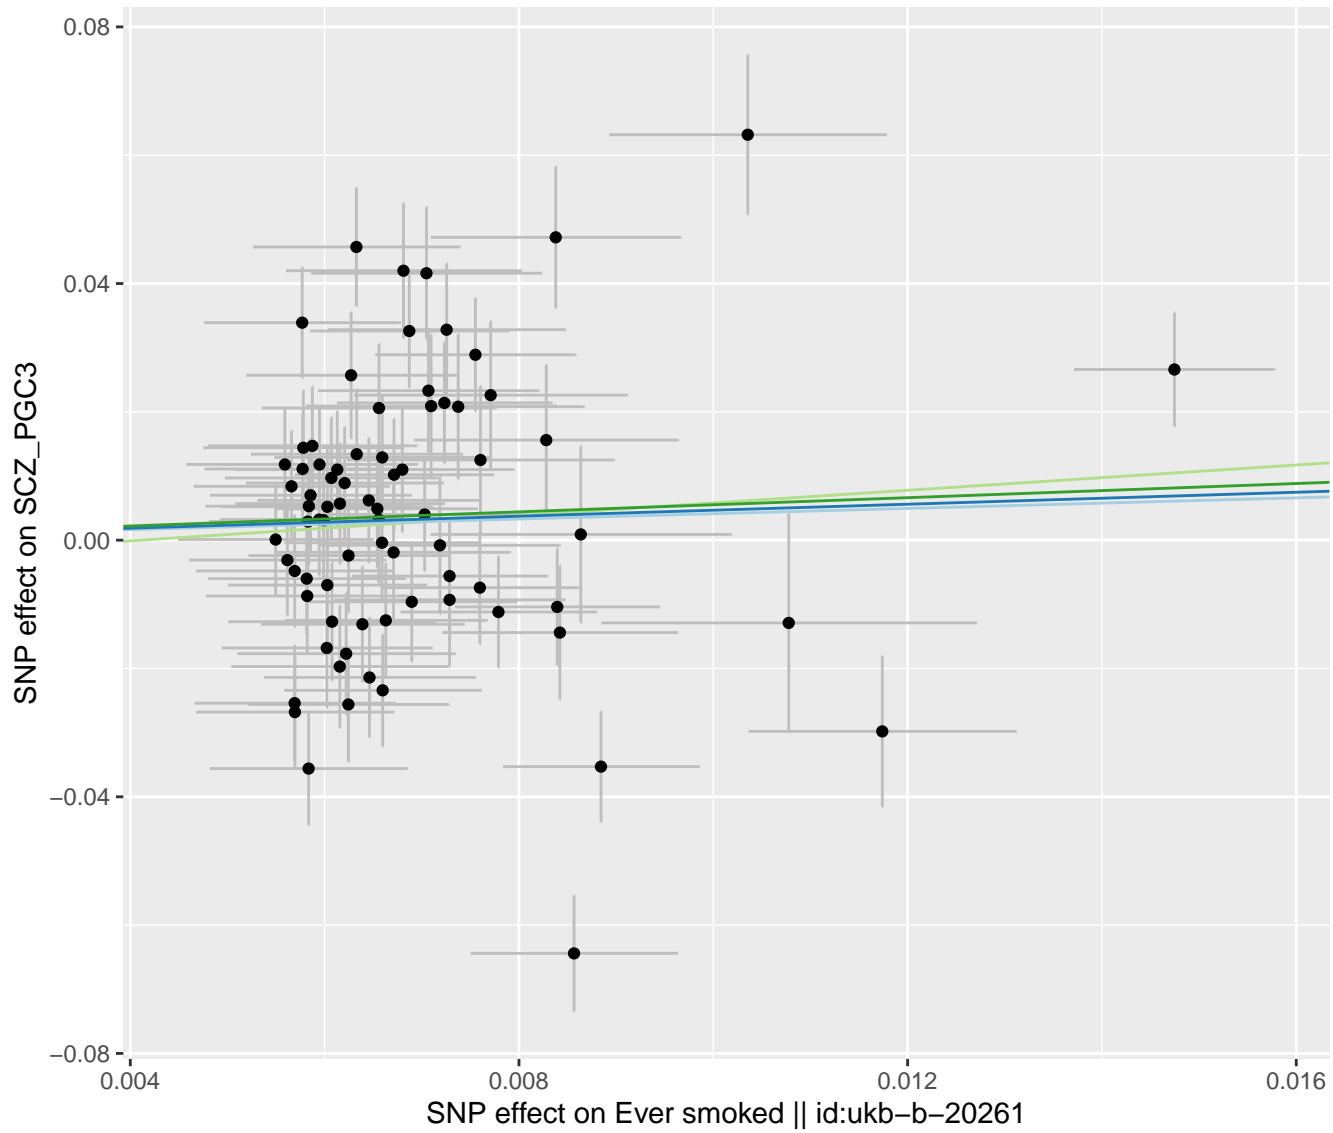

# MR Test

- Inverse variance weighted
- Maximum likelihood
- MR Egger
- Weighted median

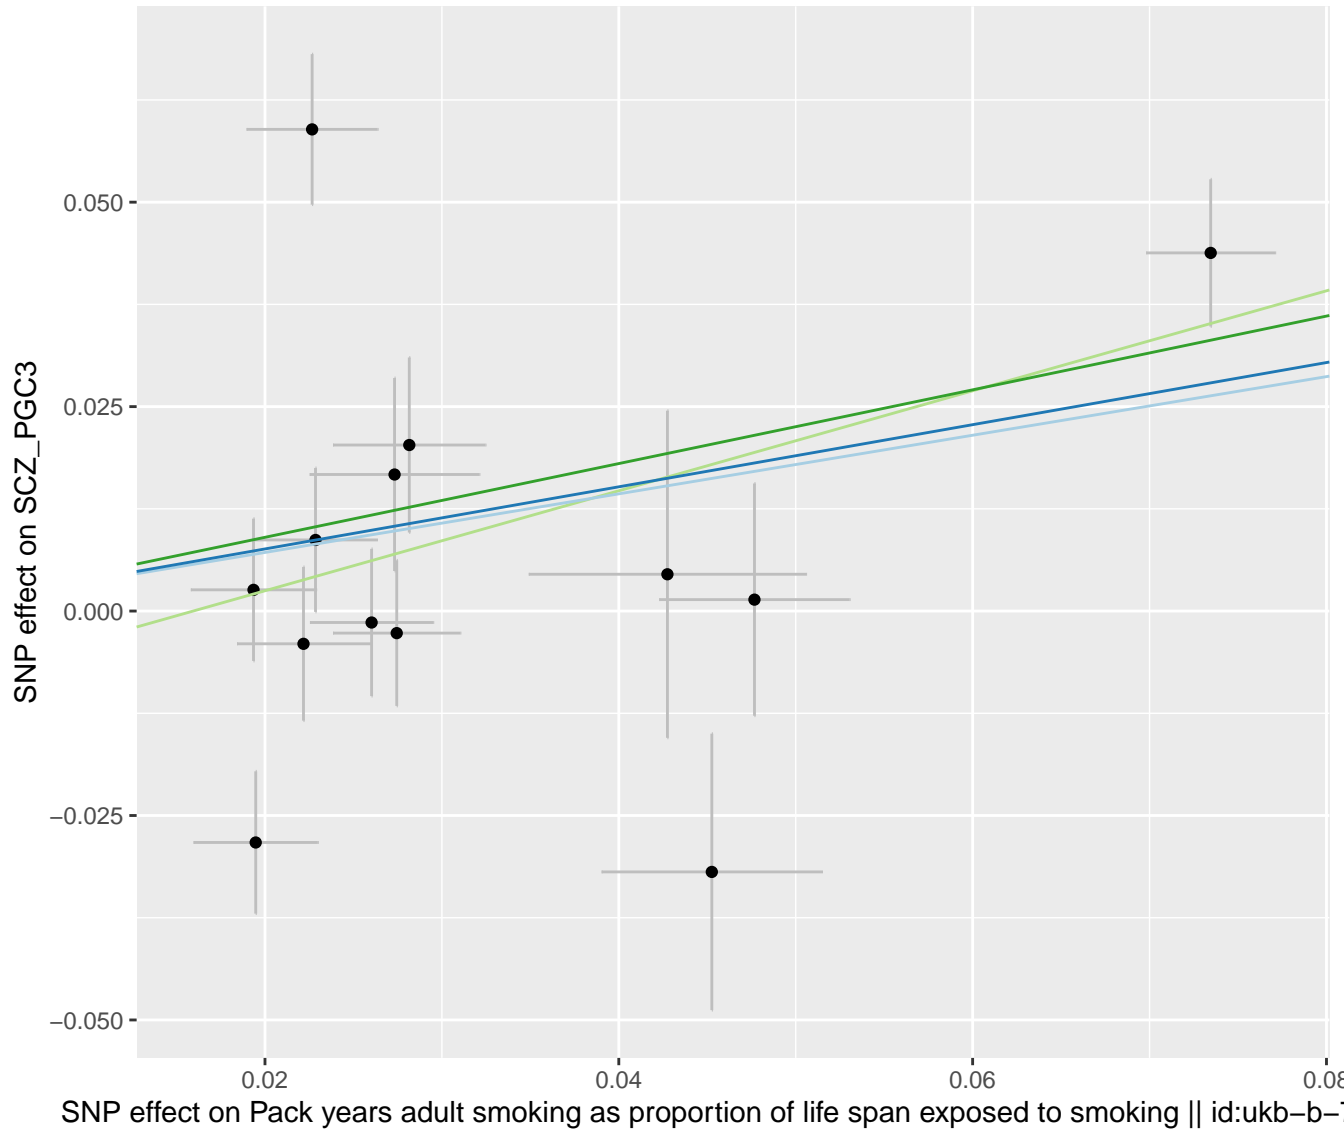

# MR Test

- Inverse variance weighted
- Maximum likelihood
- MR Egger
- Weighted median

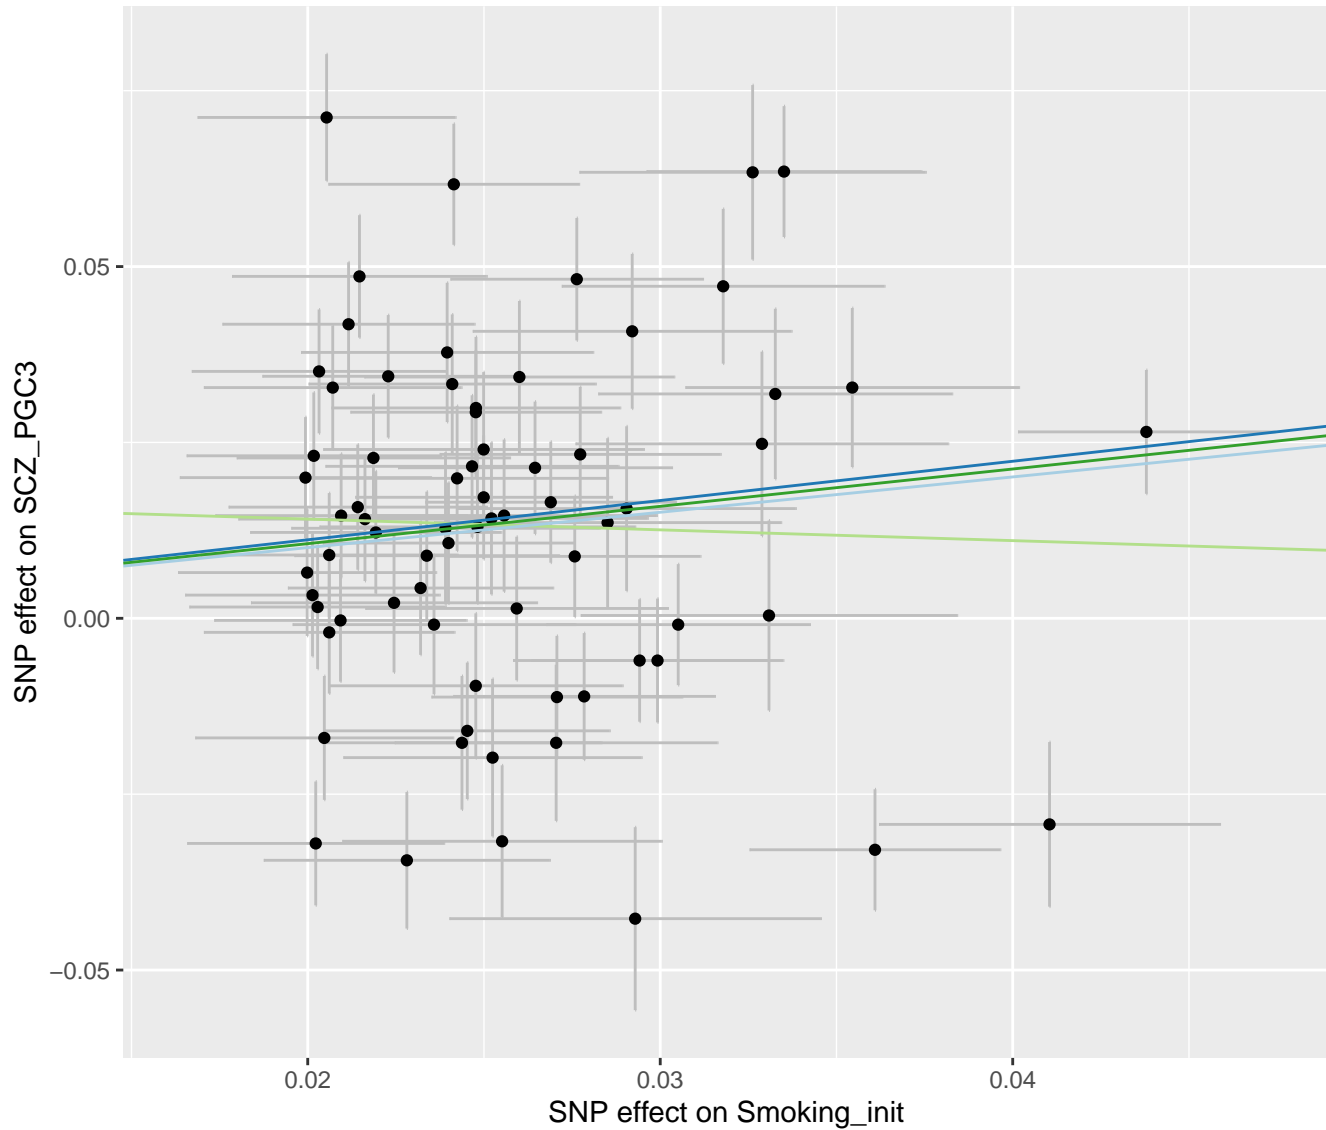

# MR Test

- Inverse variance weighted
- Maximum likelihood
- MR Egger
- Weighted median

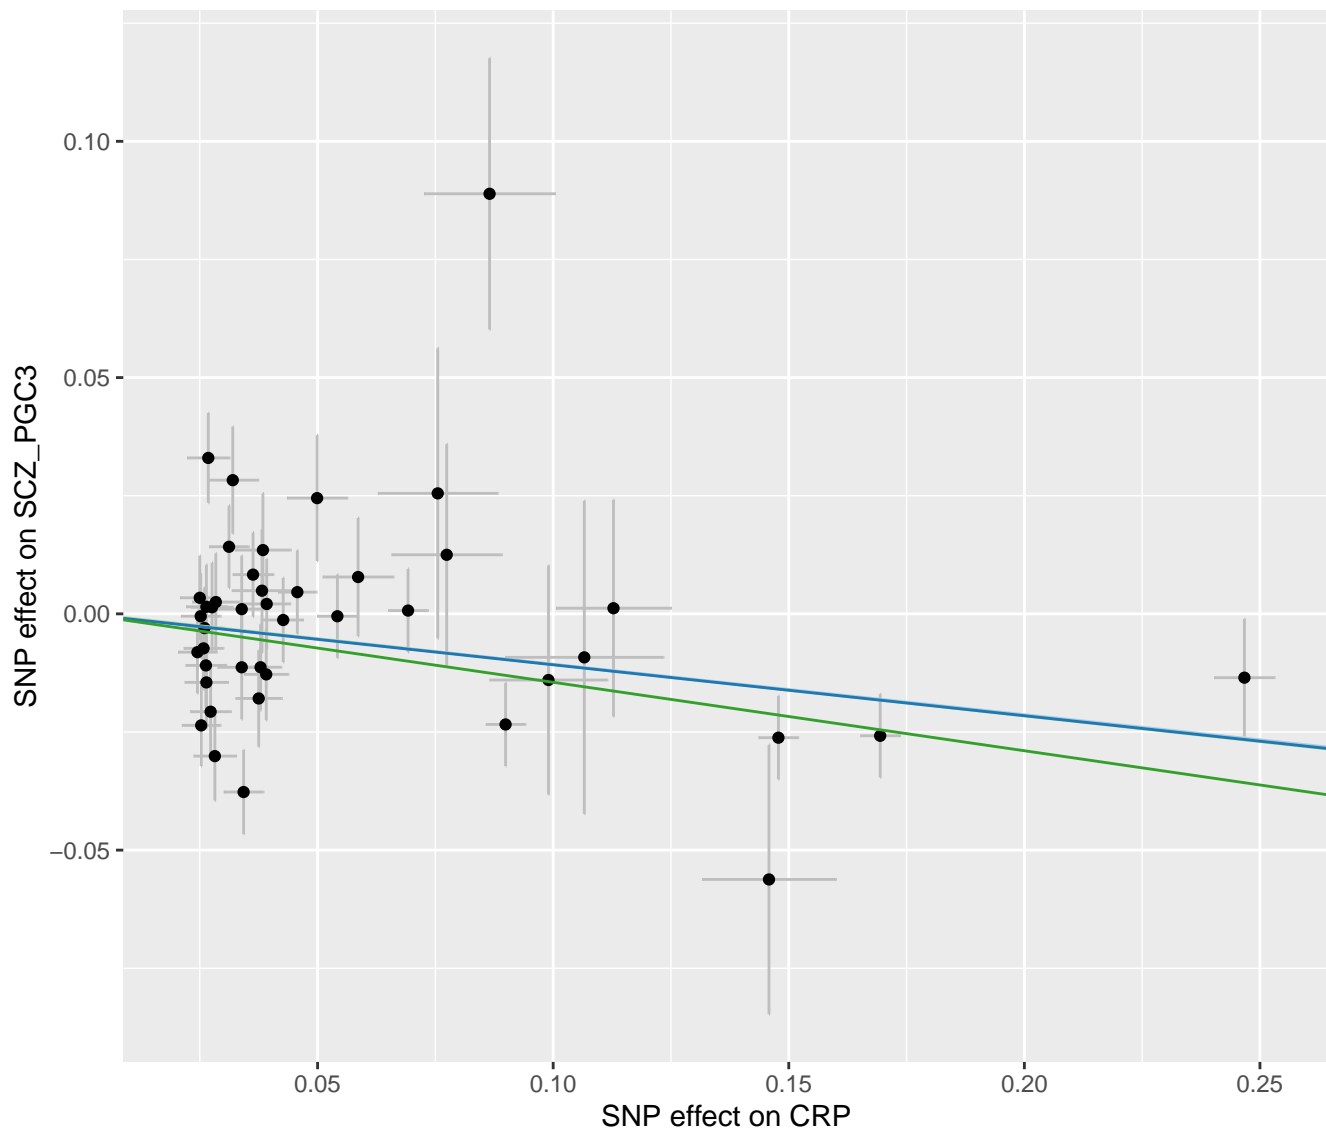



# MR Test

- Inverse variance weighted
- Maximum likelihood
- MR Egger
- Weighted median

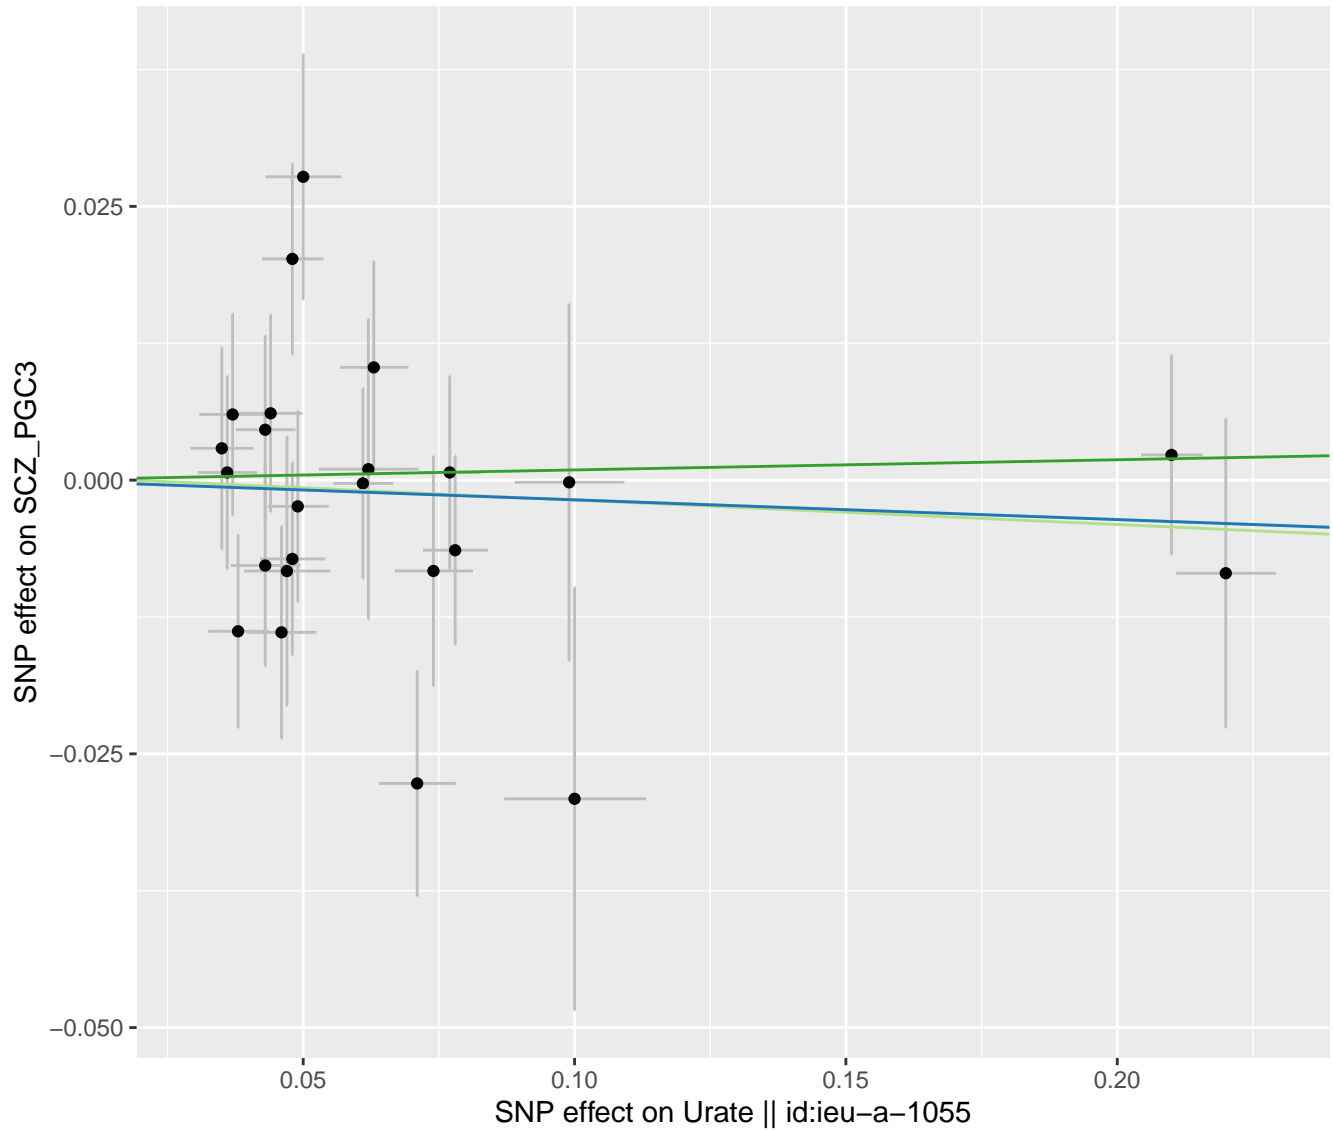

# MR Test

- Inverse variance weighted
- Maximum likelihood
- MR Egger
- Weighted median

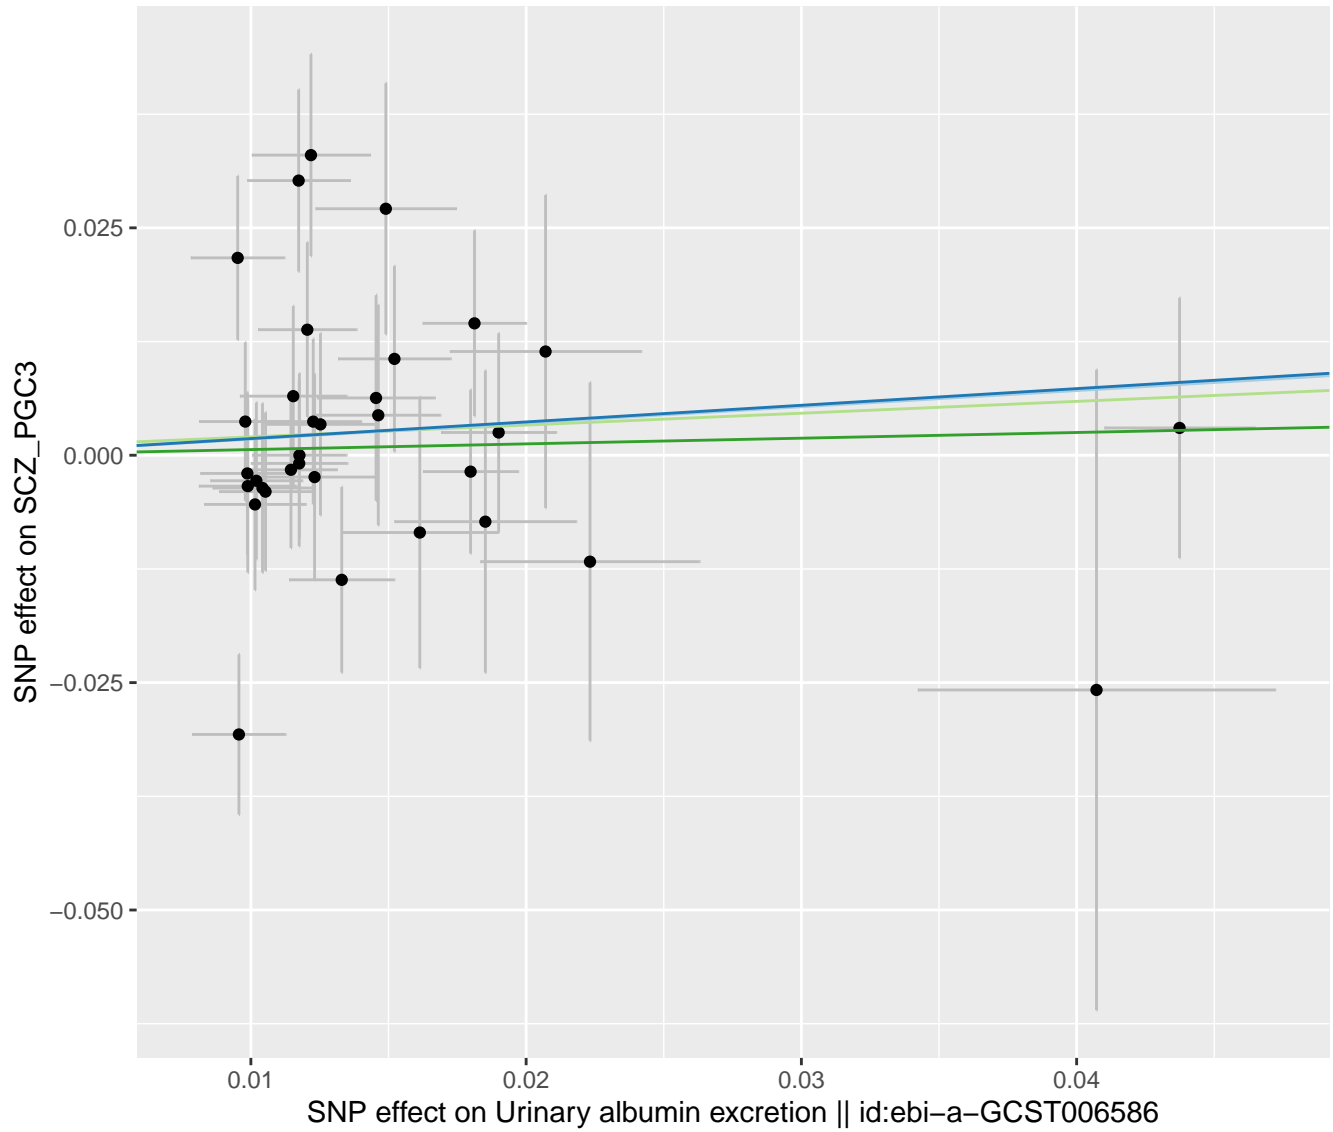

# MR Test

- Inverse variance weighted
- Maximum likelihood
- MR Egger
- Weighted median

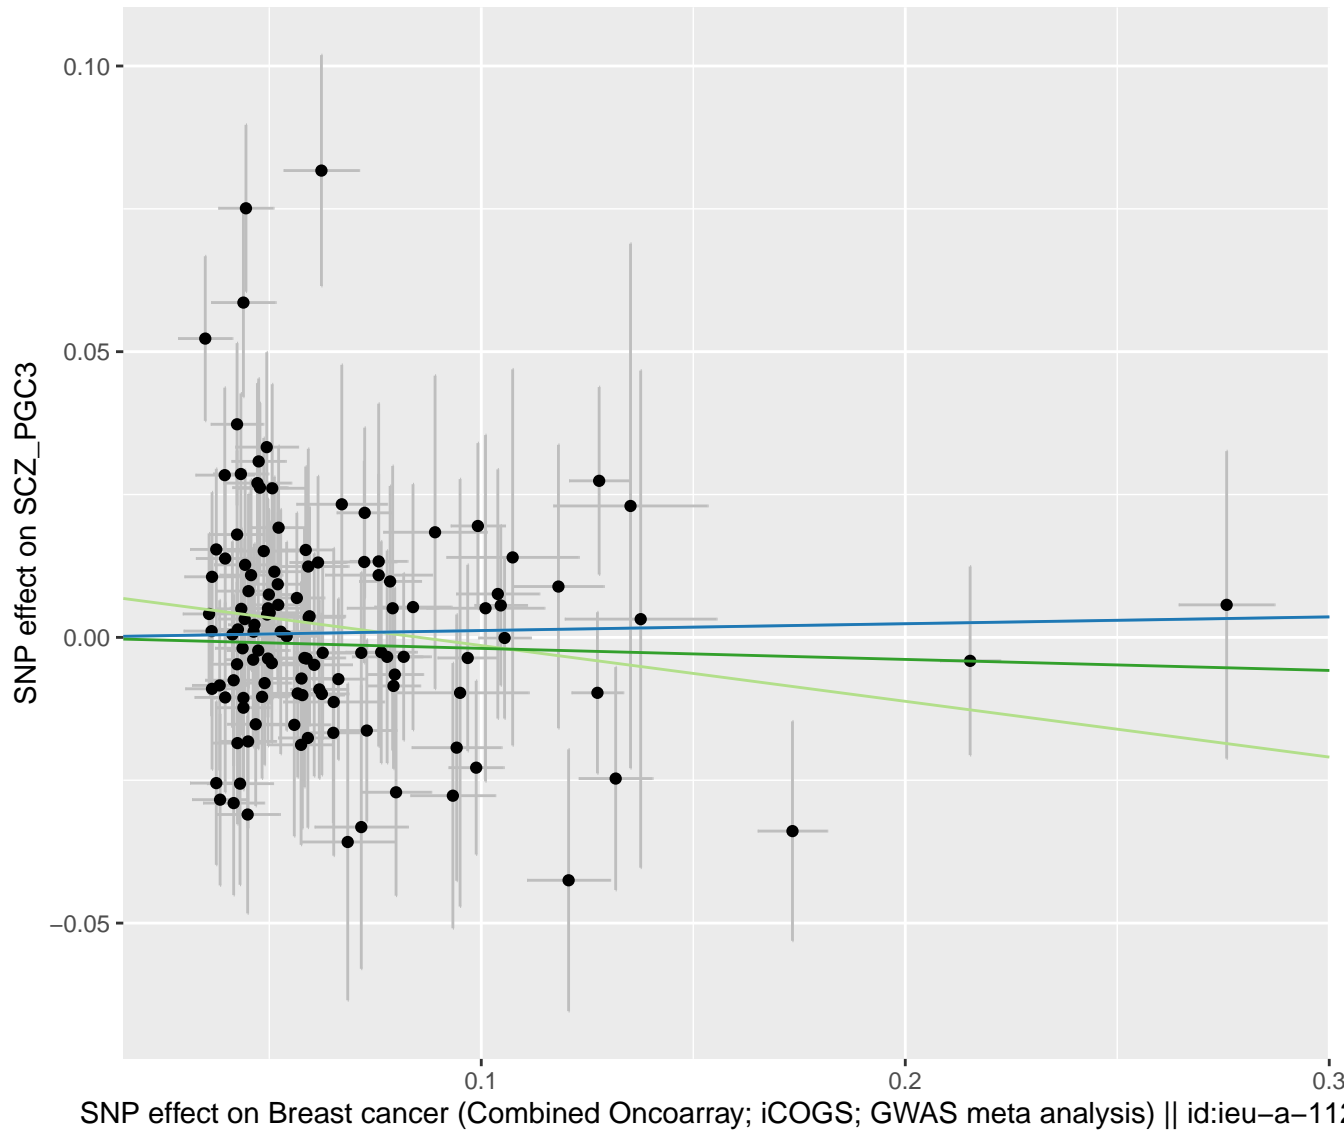

# MR Test

- Inverse variance weighted
- Maximum likelihood
- MR Egger
- Weighted median

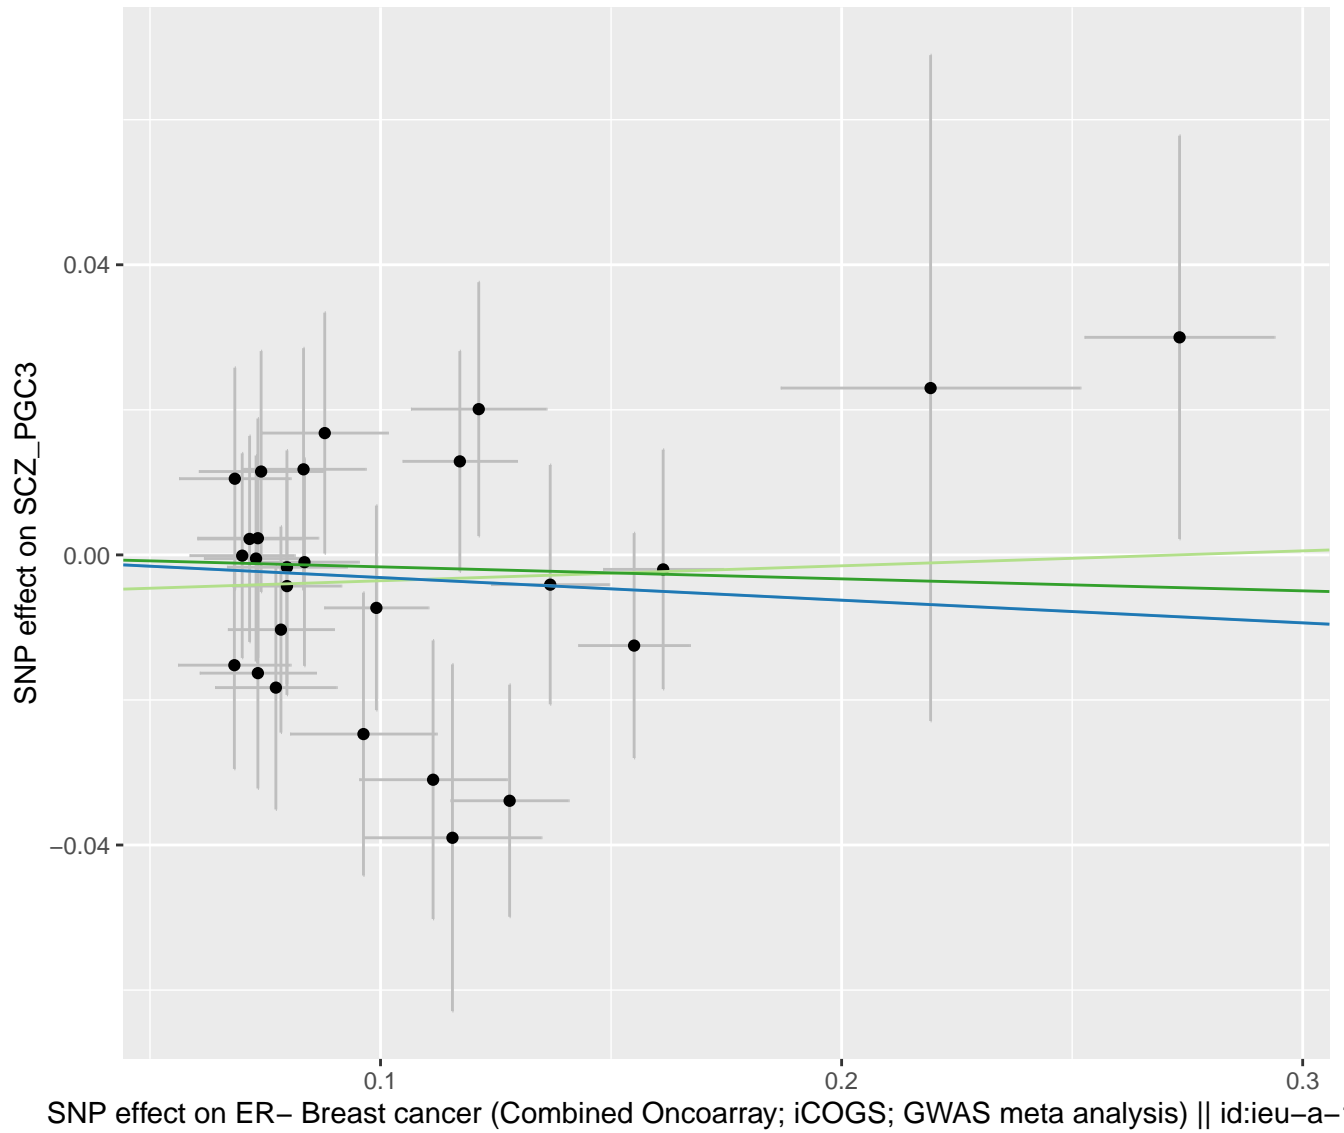

# MR Test

- Inverse variance weighted
- Maximum likelihood
- MR Egger
- Weighted median

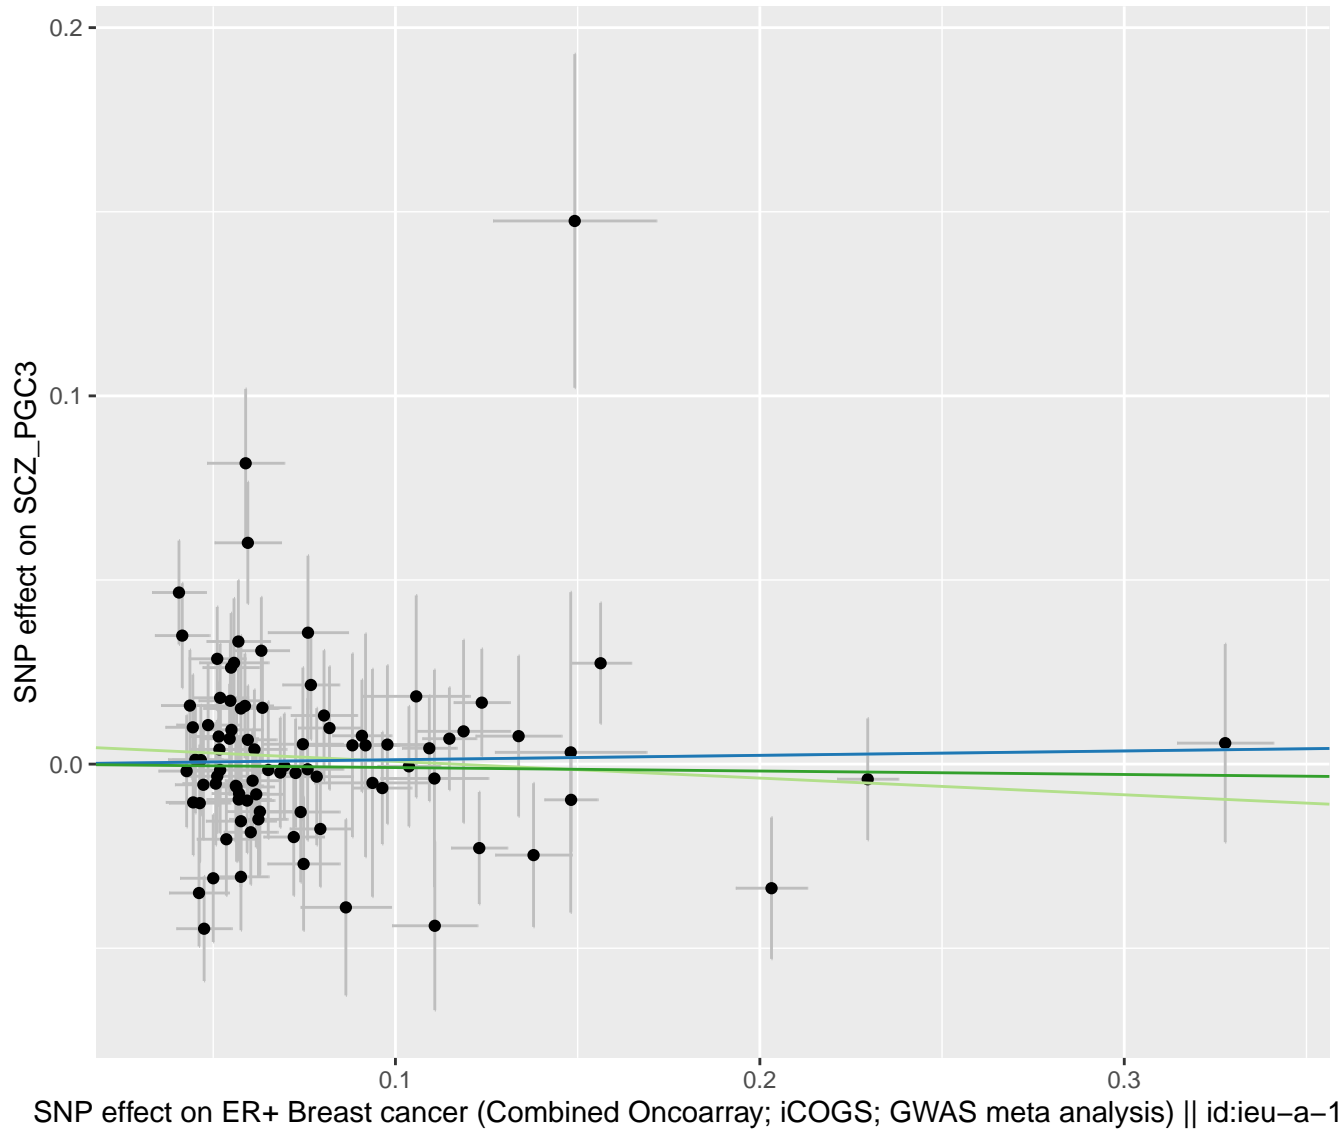

# MR Test

- Inverse variance weighted
- Maximum likelihood
- MR Egger
- Weighted median

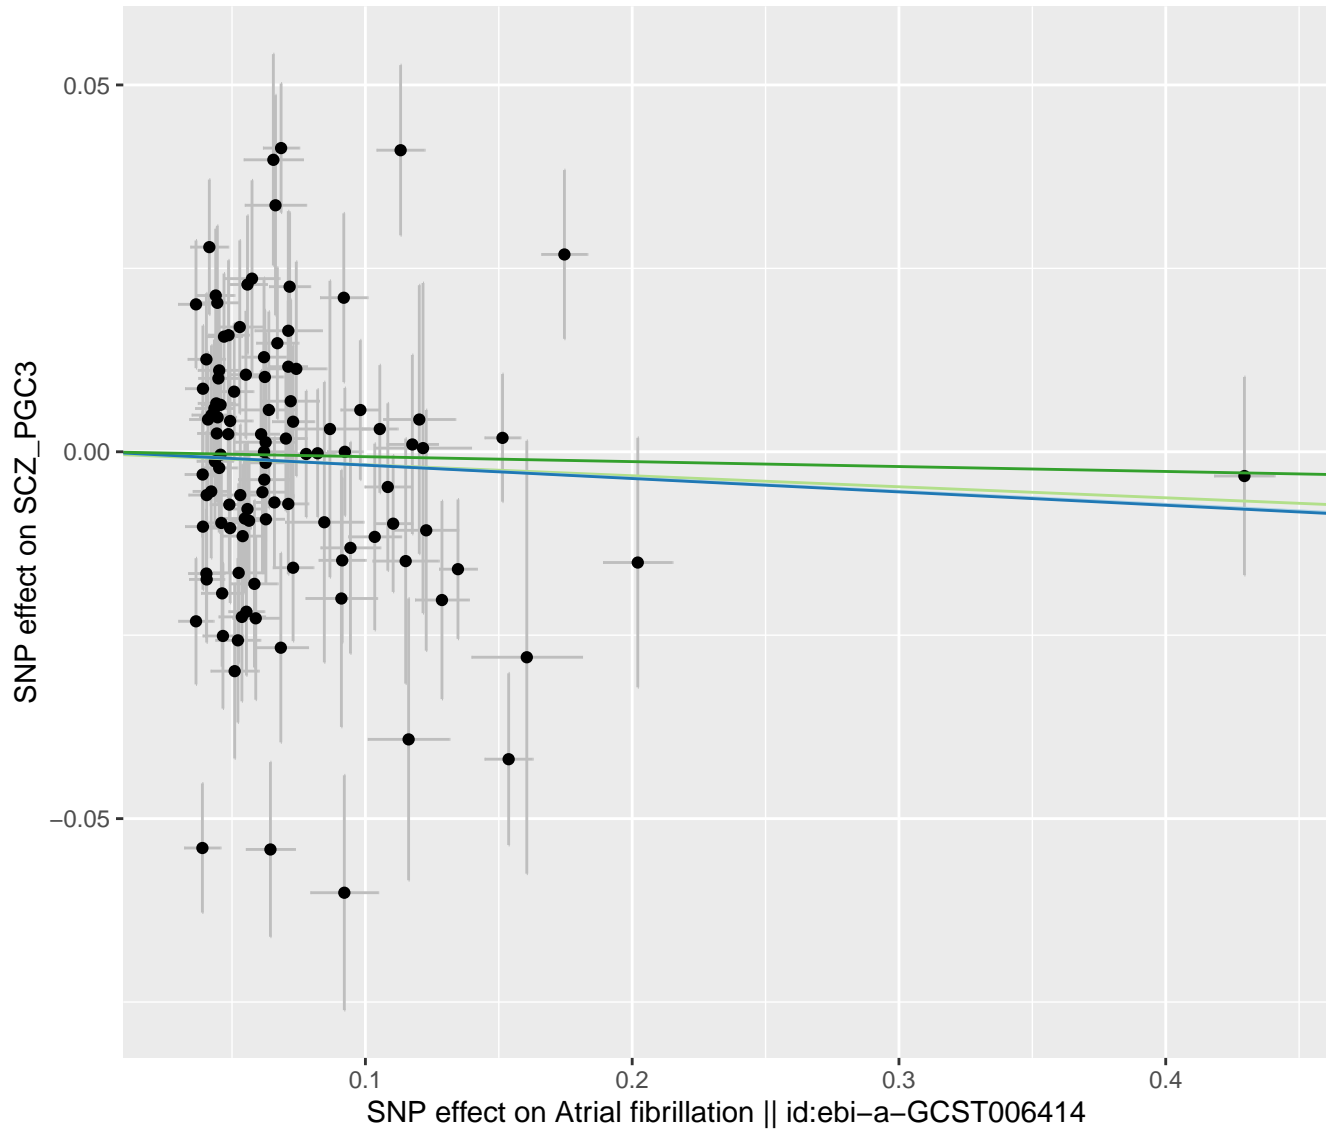

# MR Test

- Inverse variance weighted
- Maximum likelihood
- MR Egger
- Weighted median

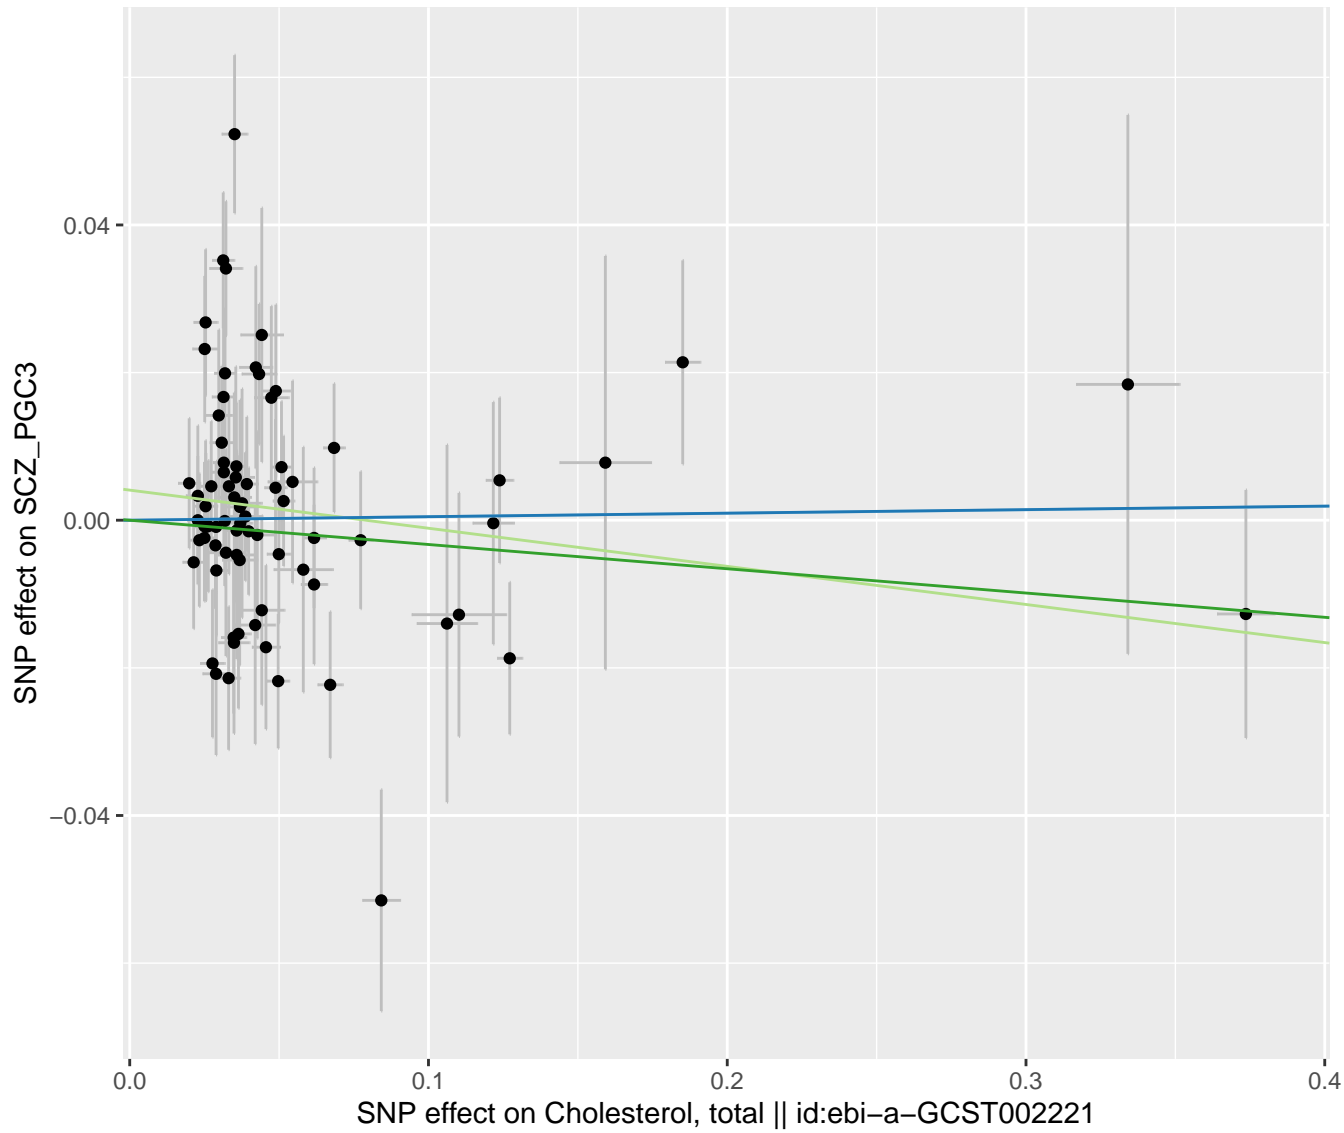

# MR Test

- Inverse variance weighted
- Maximum likelihood
- MR Egger
- Weighted median

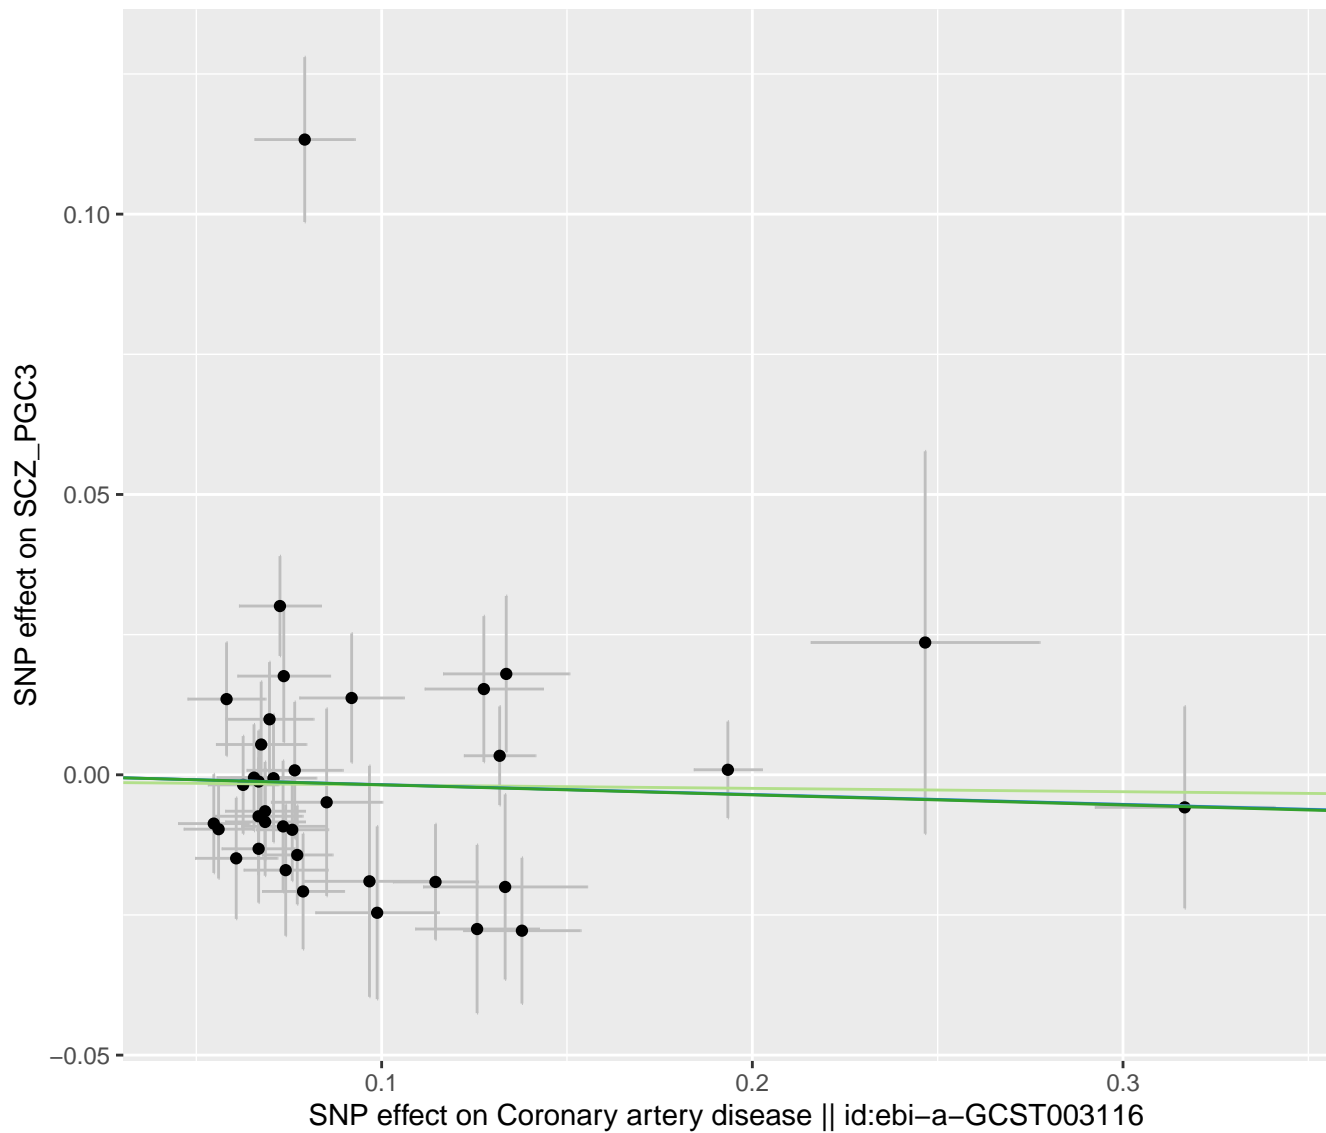



# MR Test

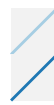

Inverse variance weighted

Maximum likelihood

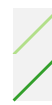

MR Egger

Weighted median

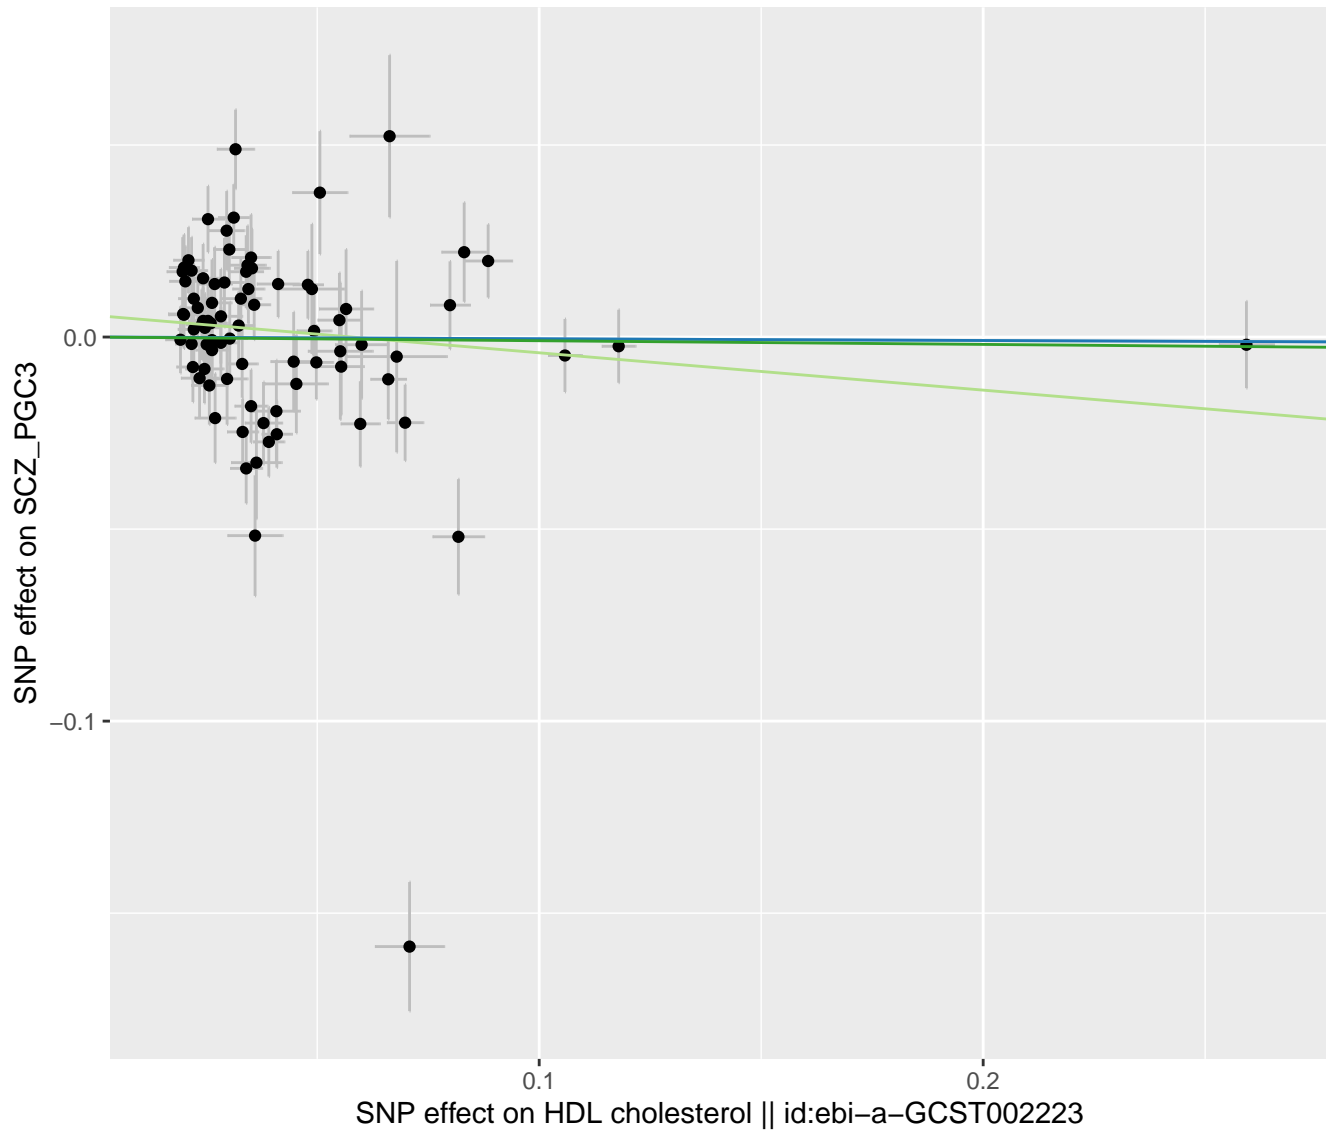

# MR Test

- Inverse variance weighted
- Maximum likelihood
- MR Egger
- Weighted median

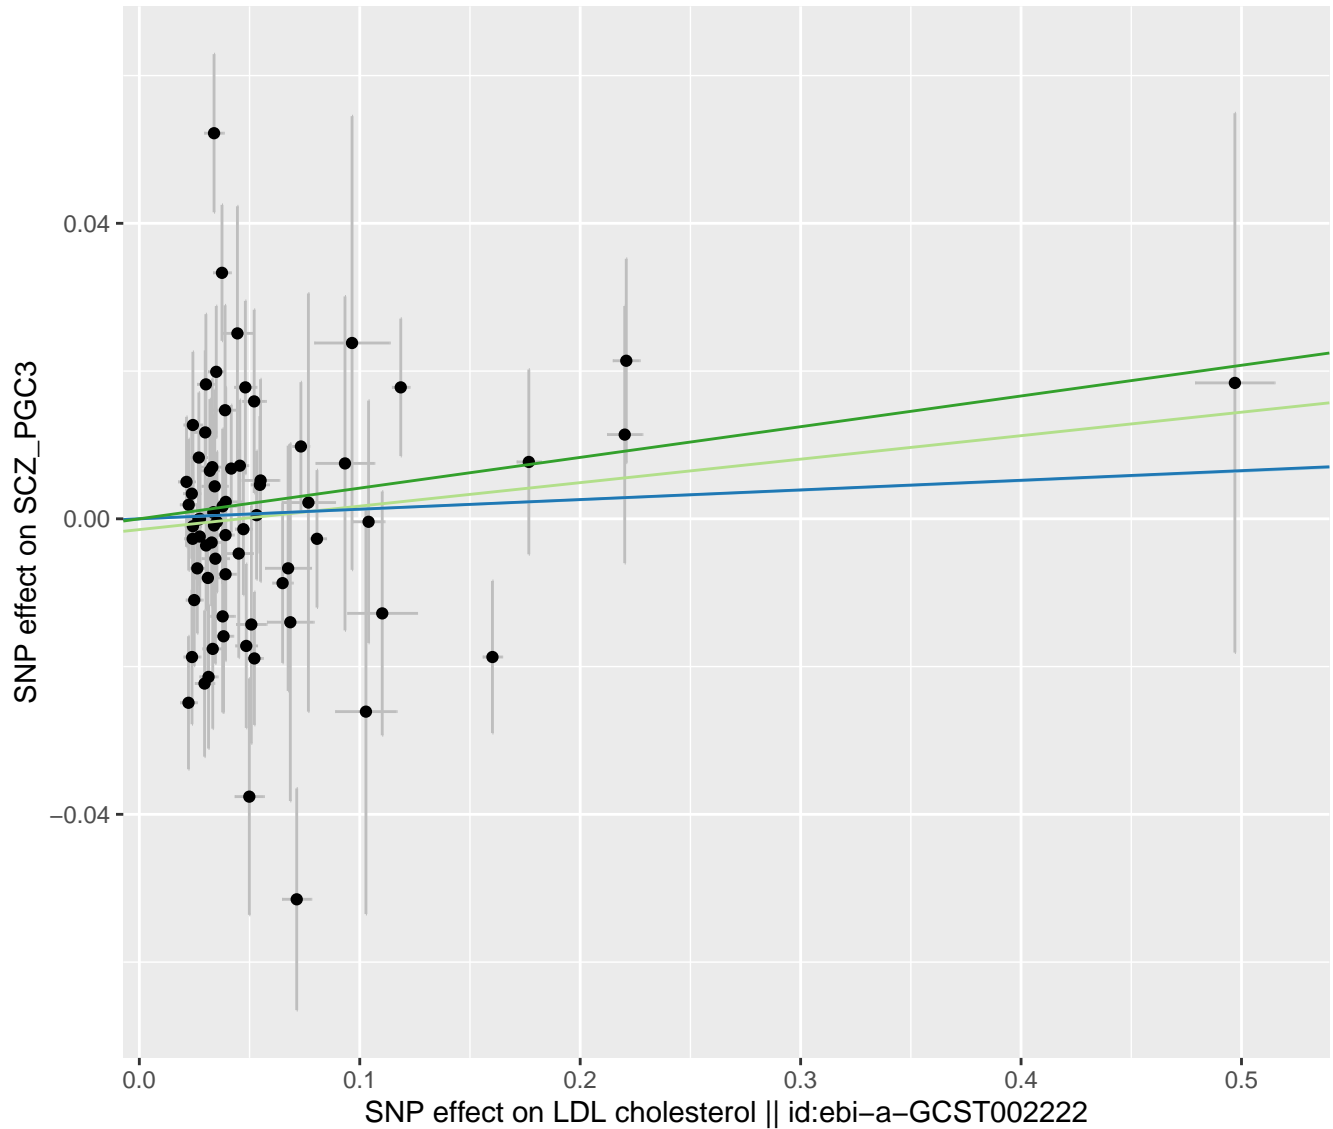

# MR Test

- Inverse variance weighted
- Maximum likelihood
- MR Egger
- Weighted median

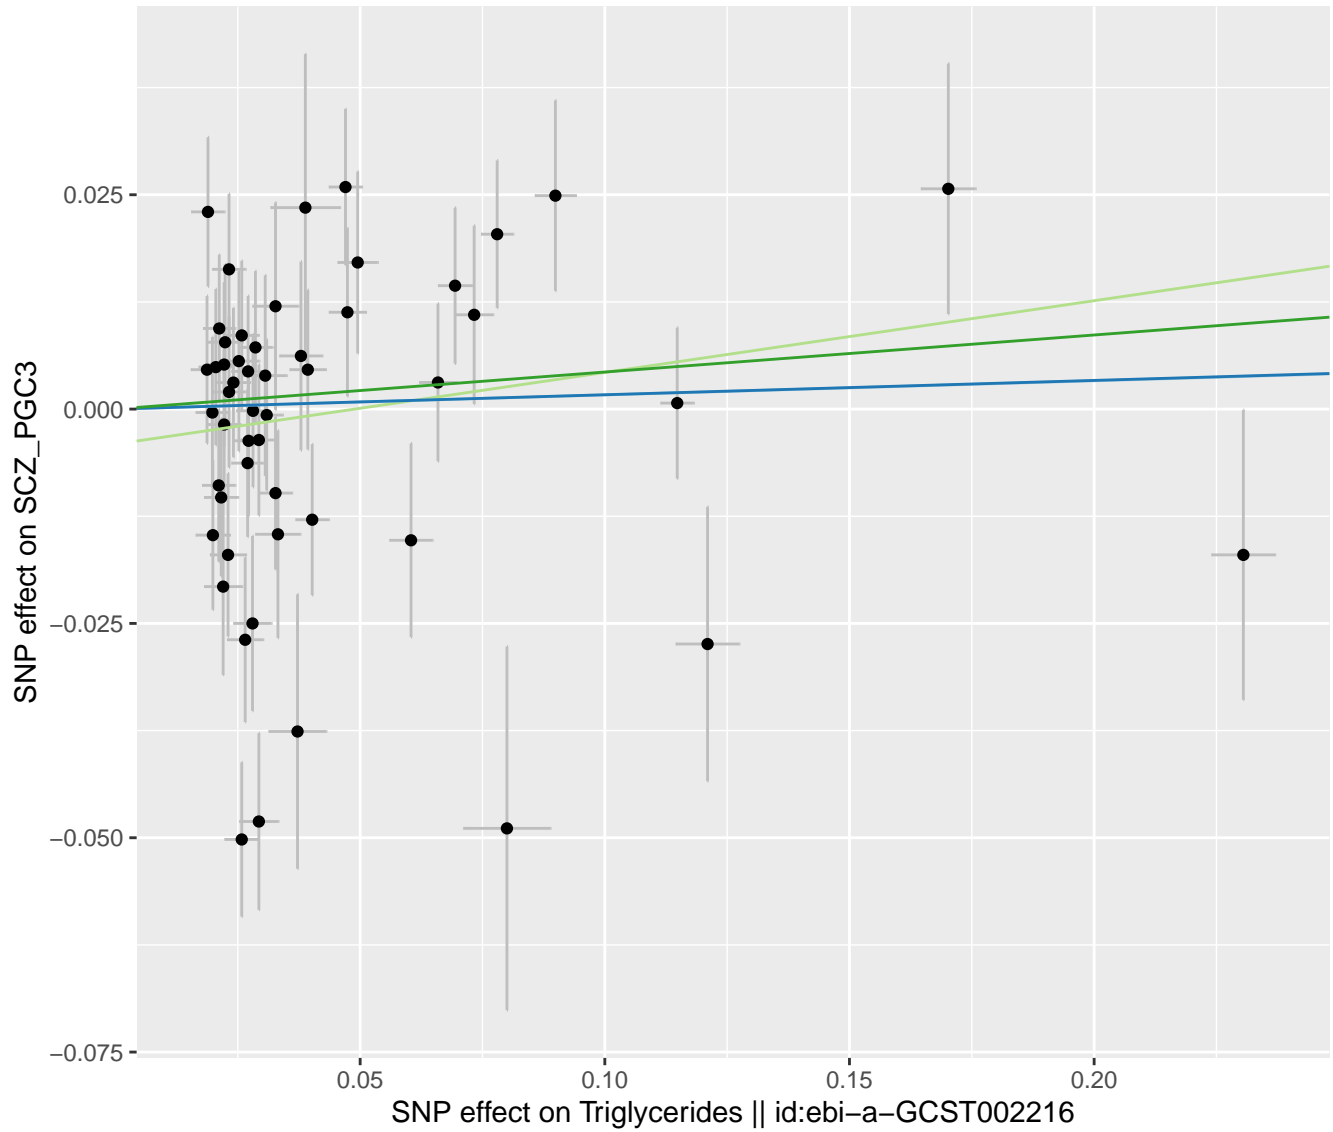

# MR Test

- Inverse variance weighted
- Maximum likelihood
- MR Egger
- Weighted median

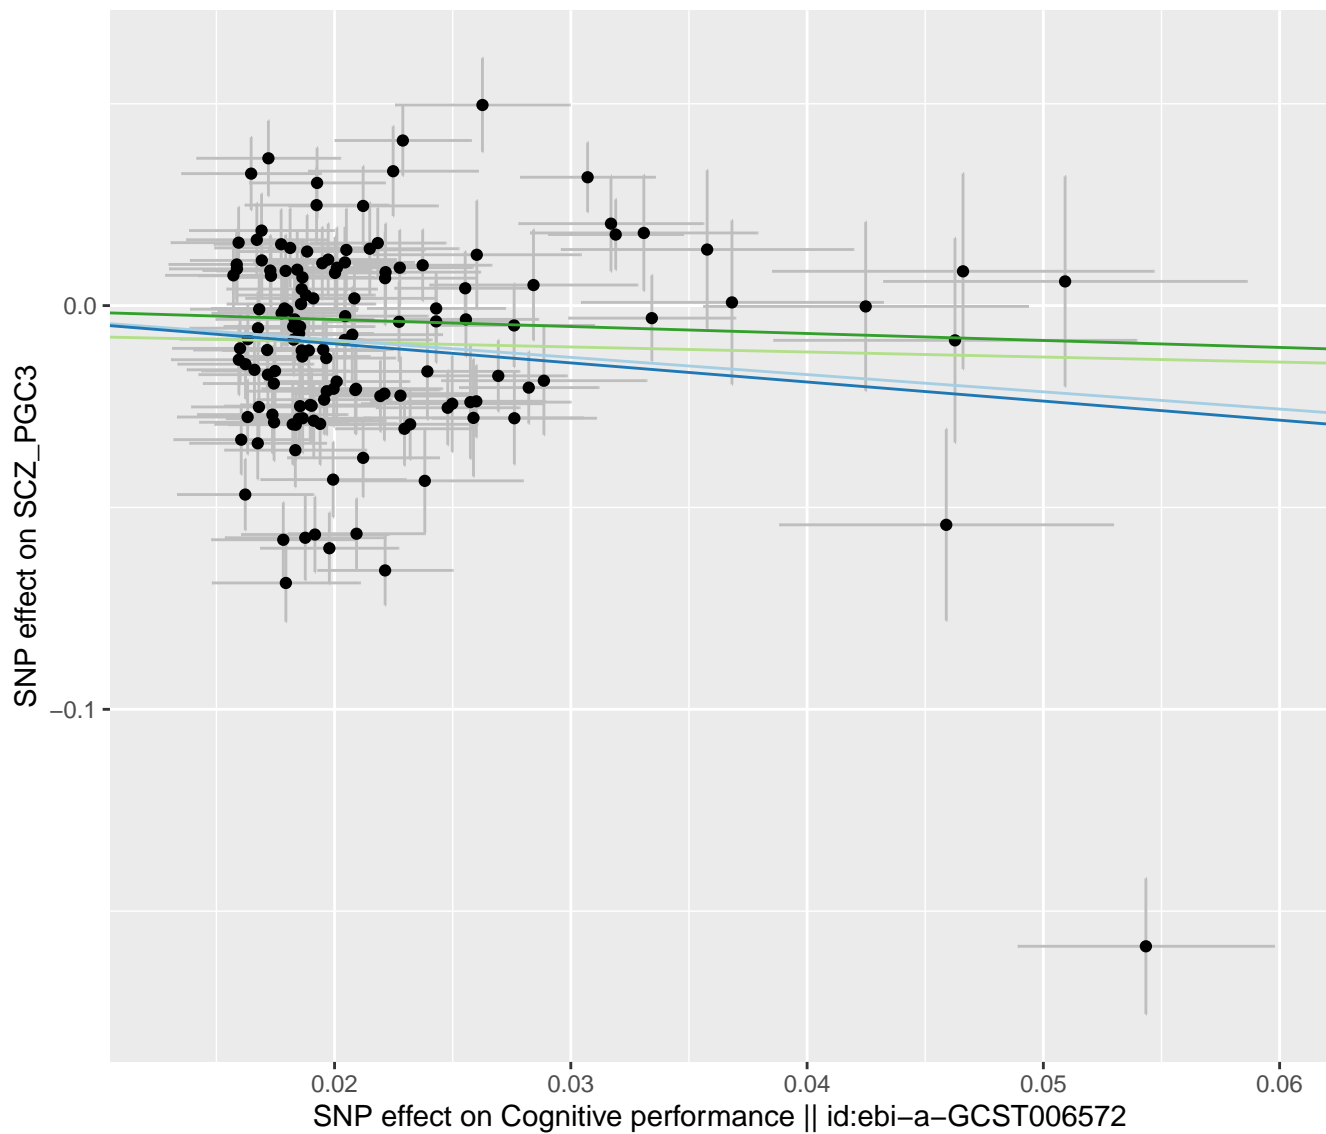

# MR Test

- Inverse variance weighted
- Maximum likelihood
- MR Egger
- Weighted median

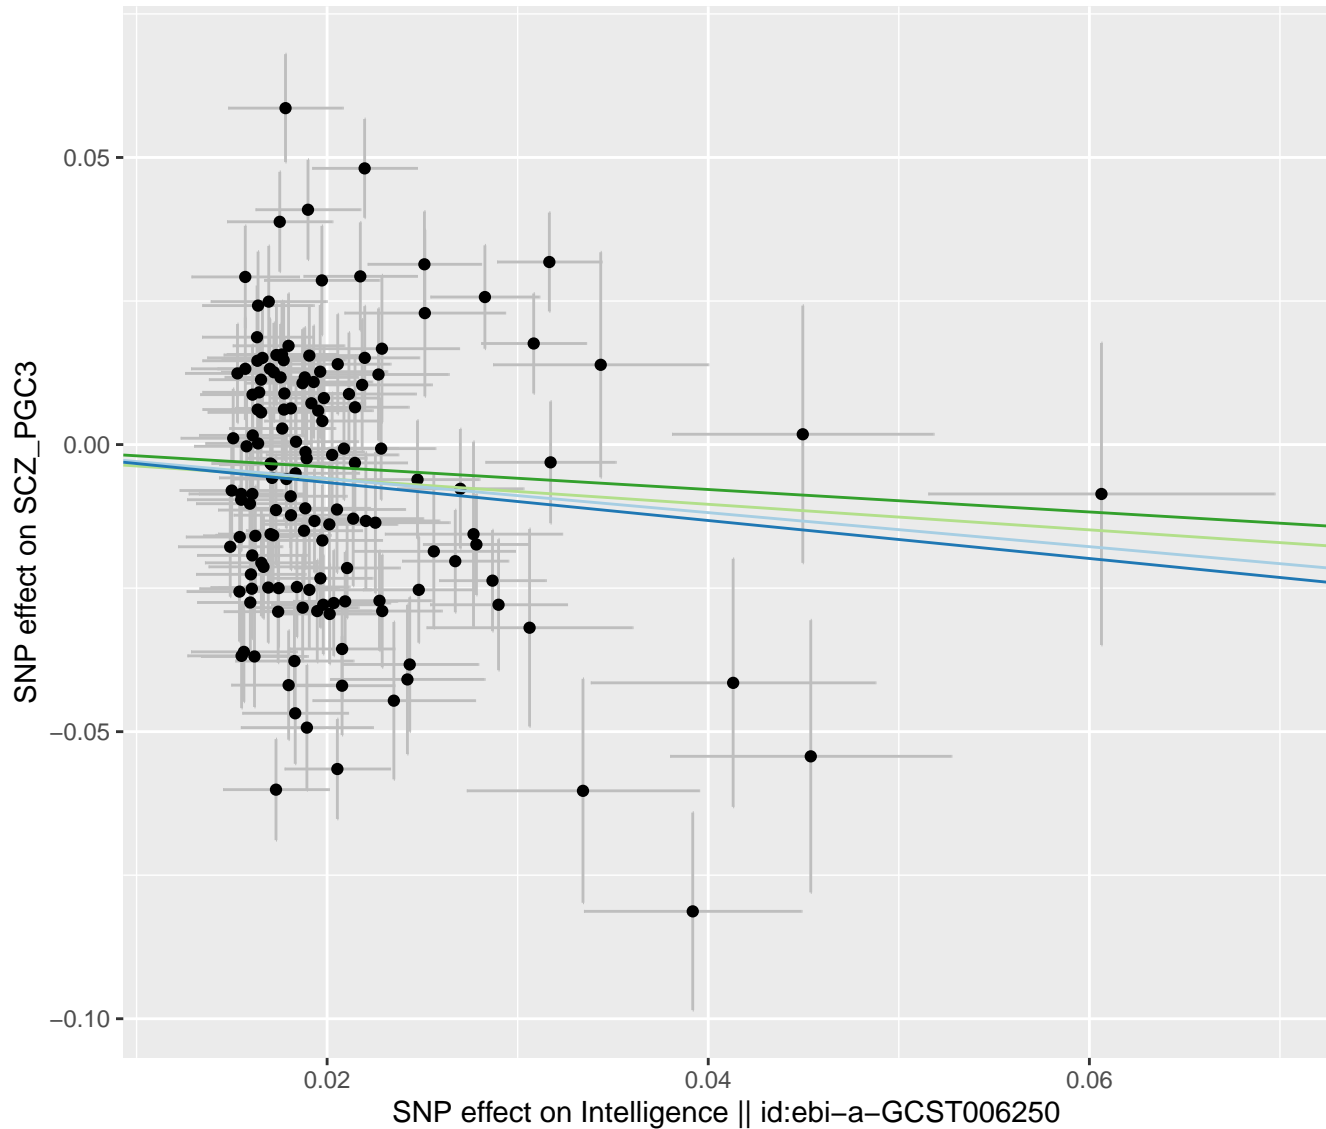

# MR Test

- Inverse variance weighted
- Maximum likelihood
- MR Egger
- Weighted median

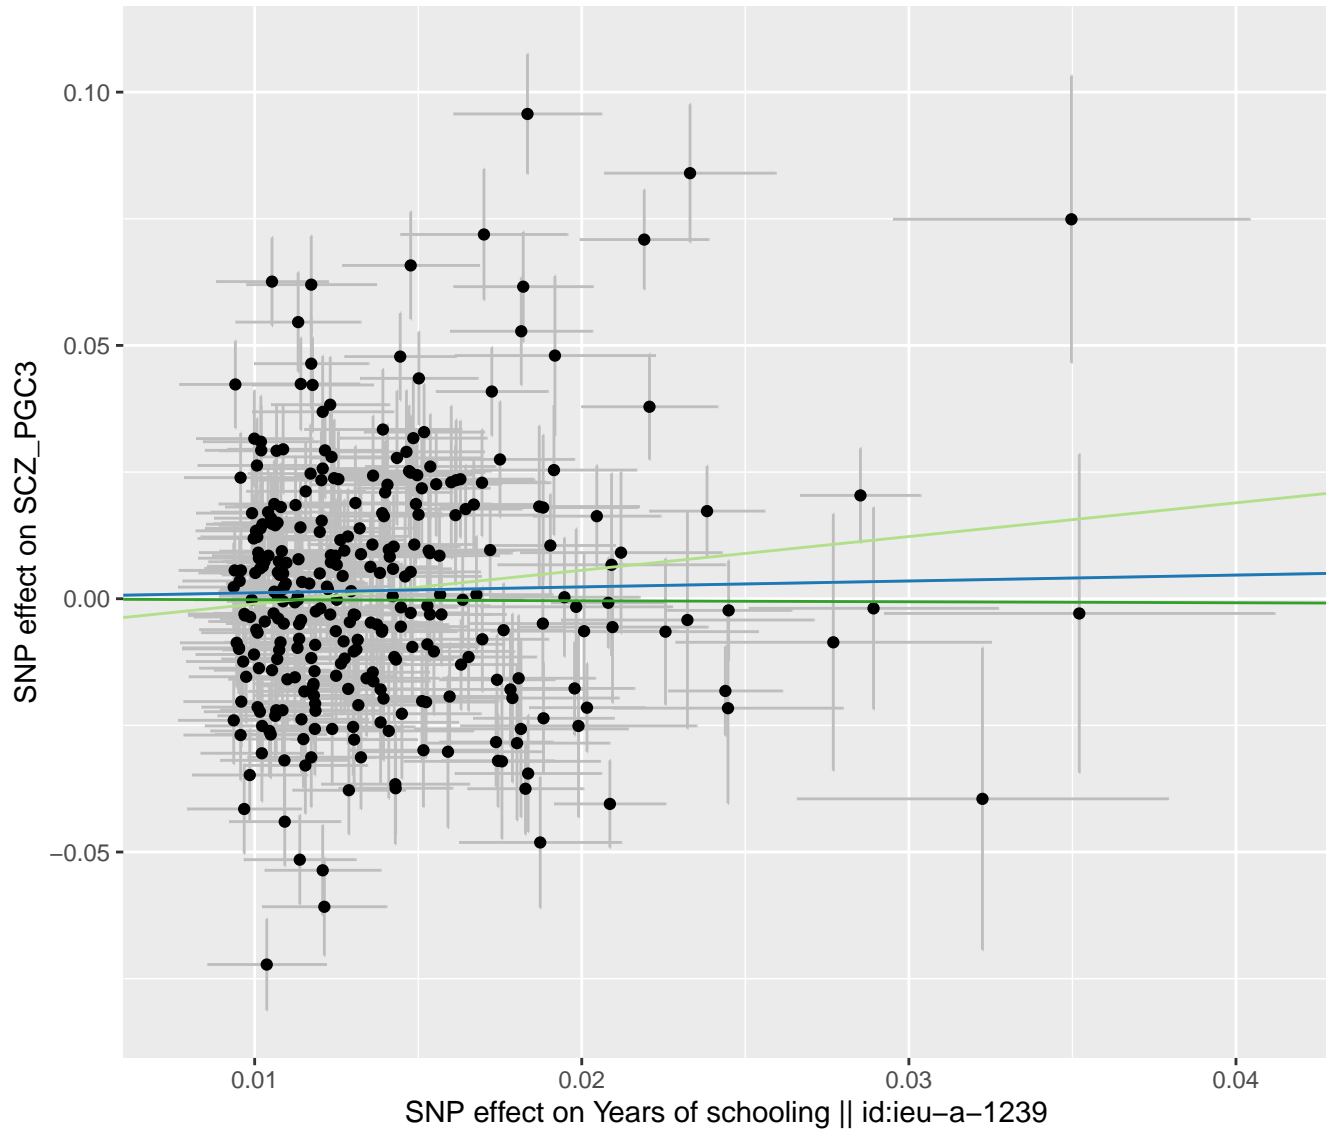

# MR Test

- Inverse variance weighted
- Maximum likelihood
- MR Egger
- Weighted median

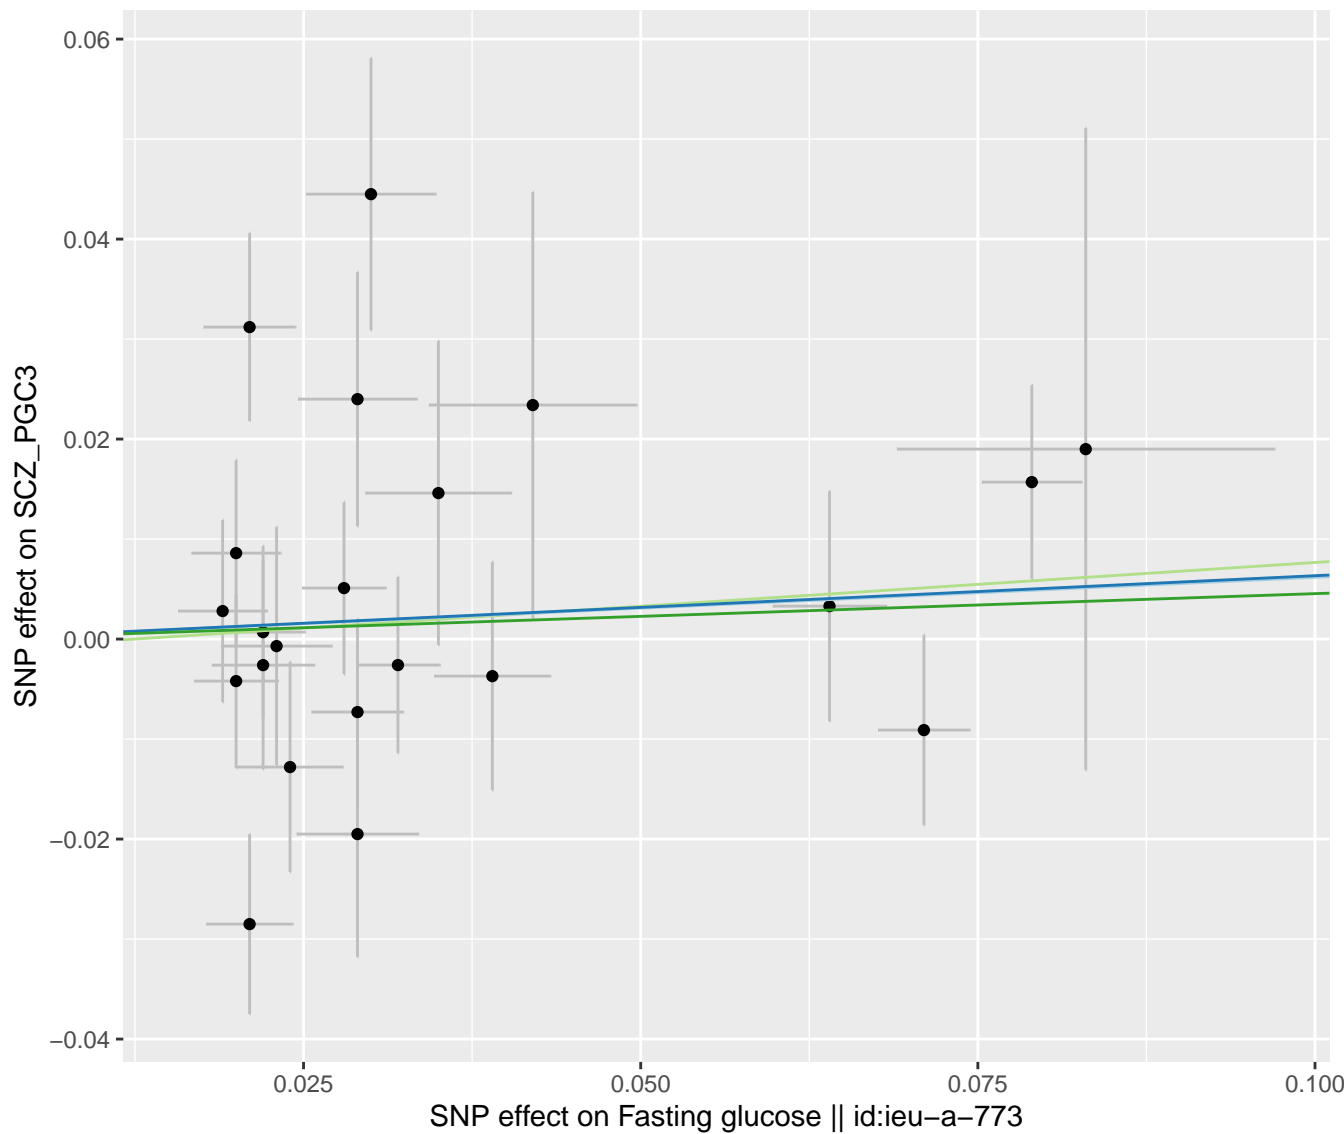

# MR Test

- Inverse variance weighted
- Maximum likelihood
- MR Egger
- Weighted median

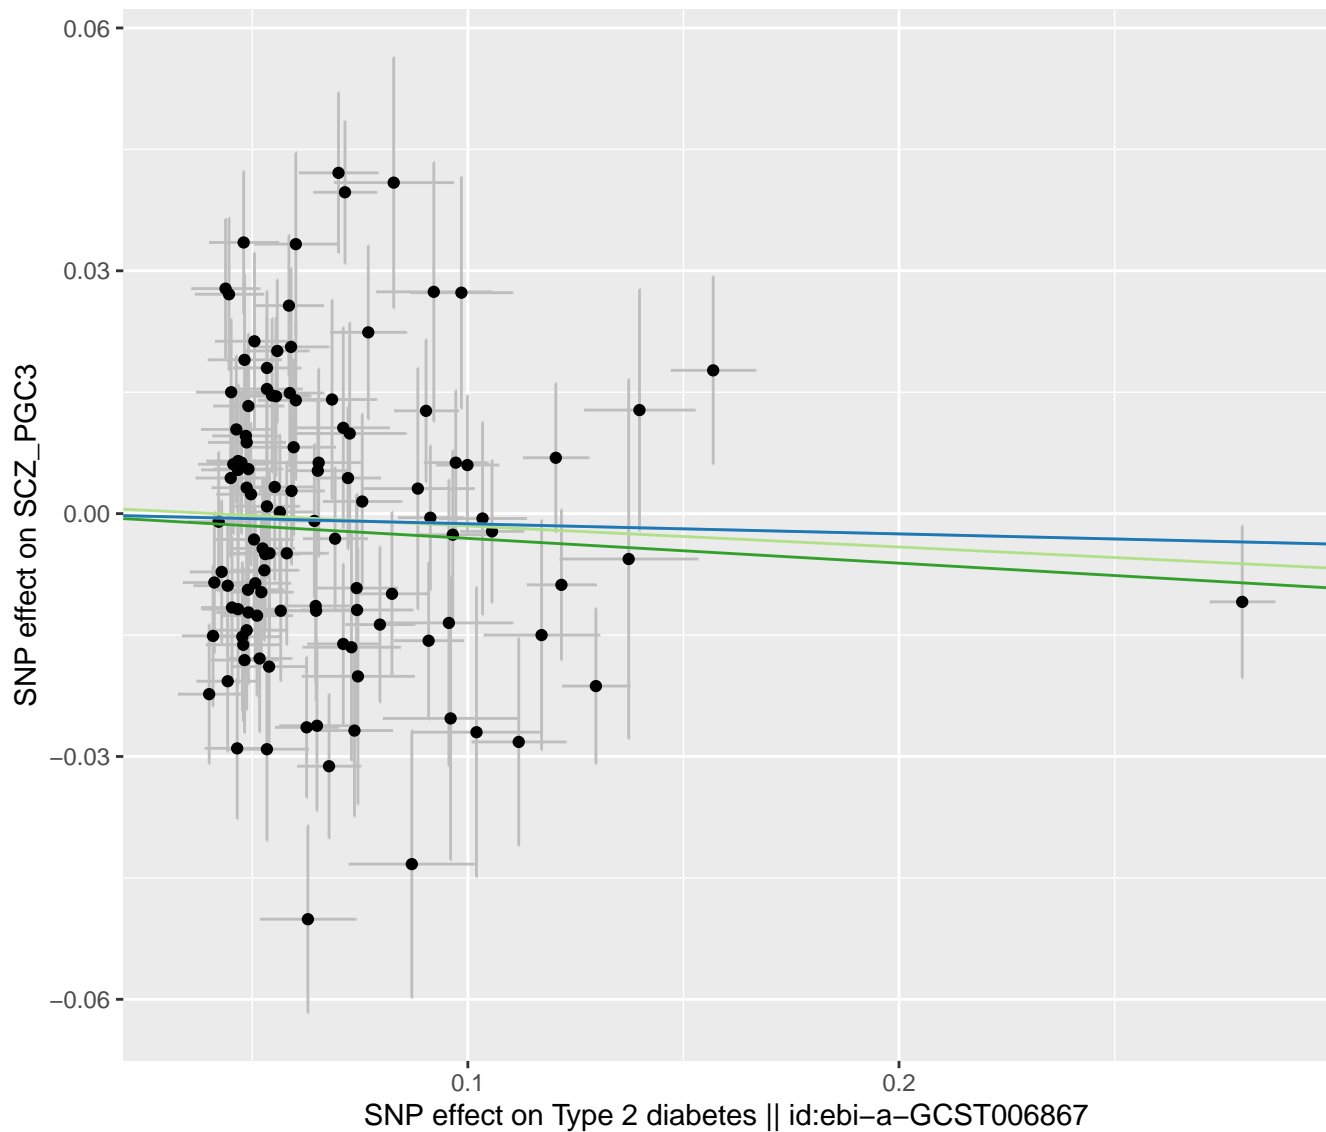



## MR Test

- Inverse variance weighted
- Maximum likelihood



MR Egger

Weighted median

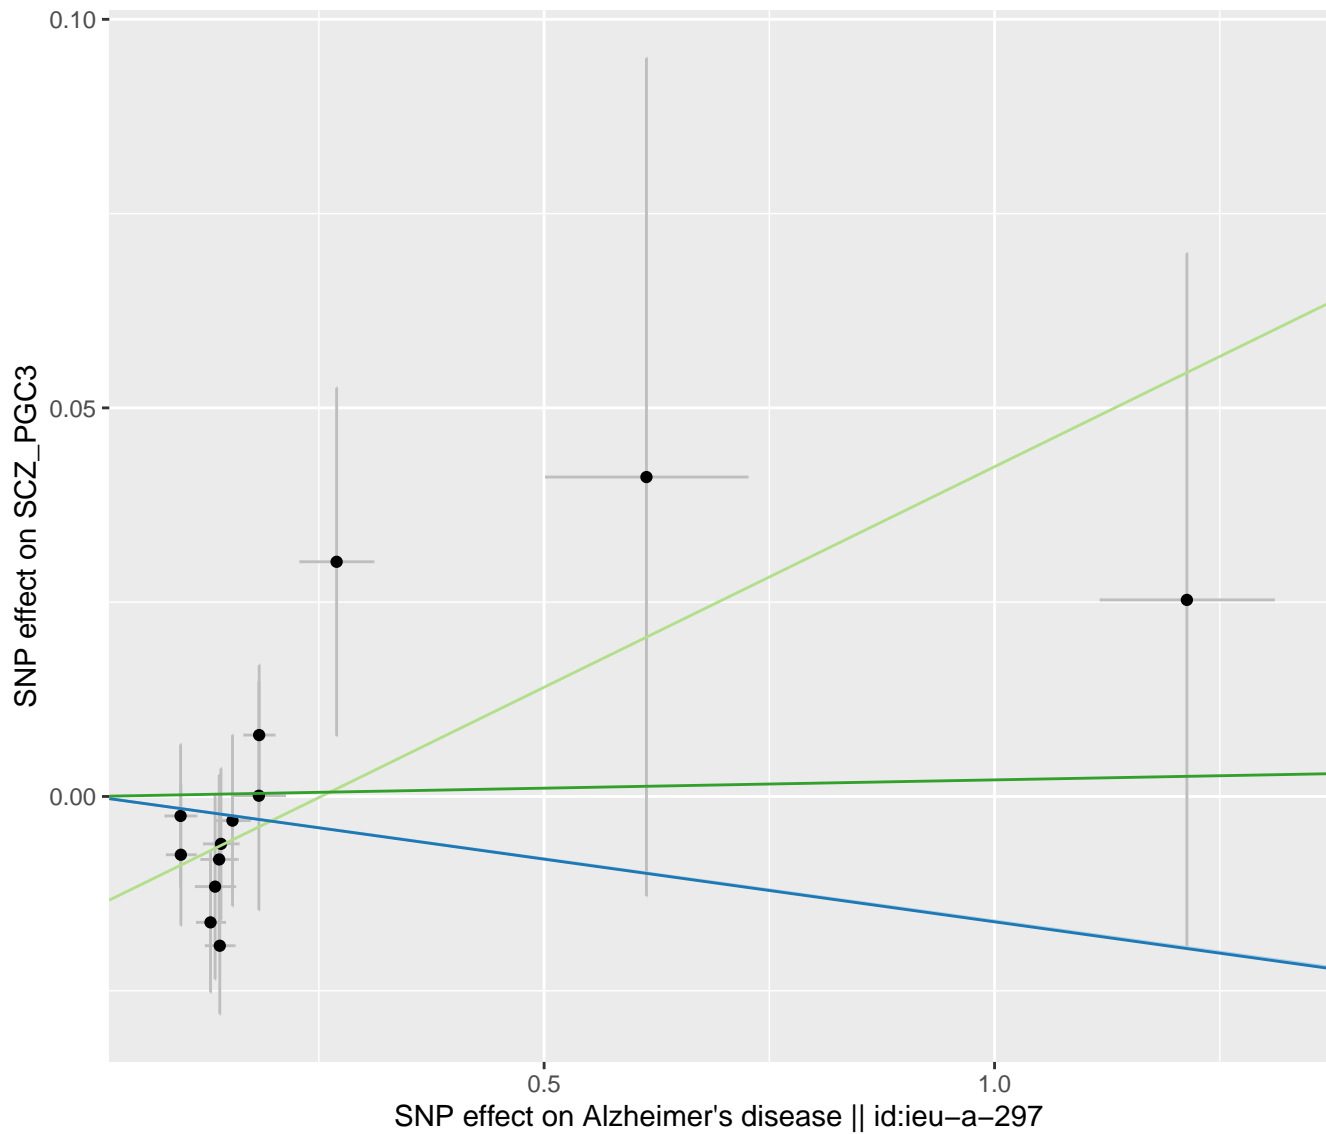

# MR Test

- Inverse variance weighted
- Maximum likelihood
- MR Egger
- Weighted median

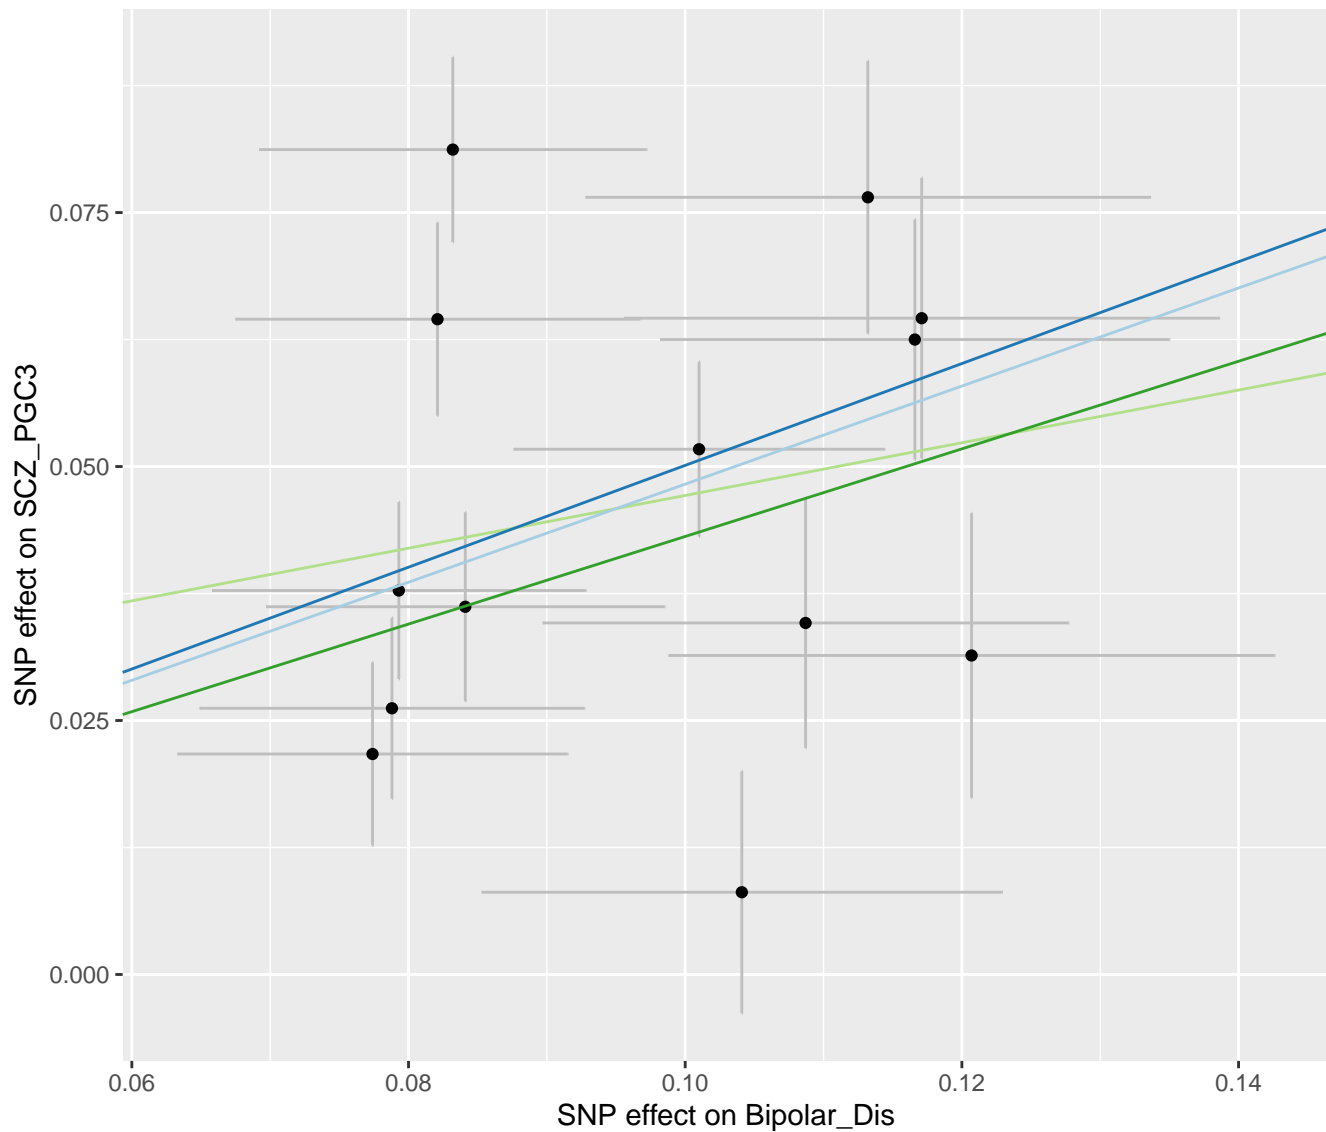

# MR Test

- Inverse variance weighted
- Maximum likelihood
- MR Egger
- Weighted median

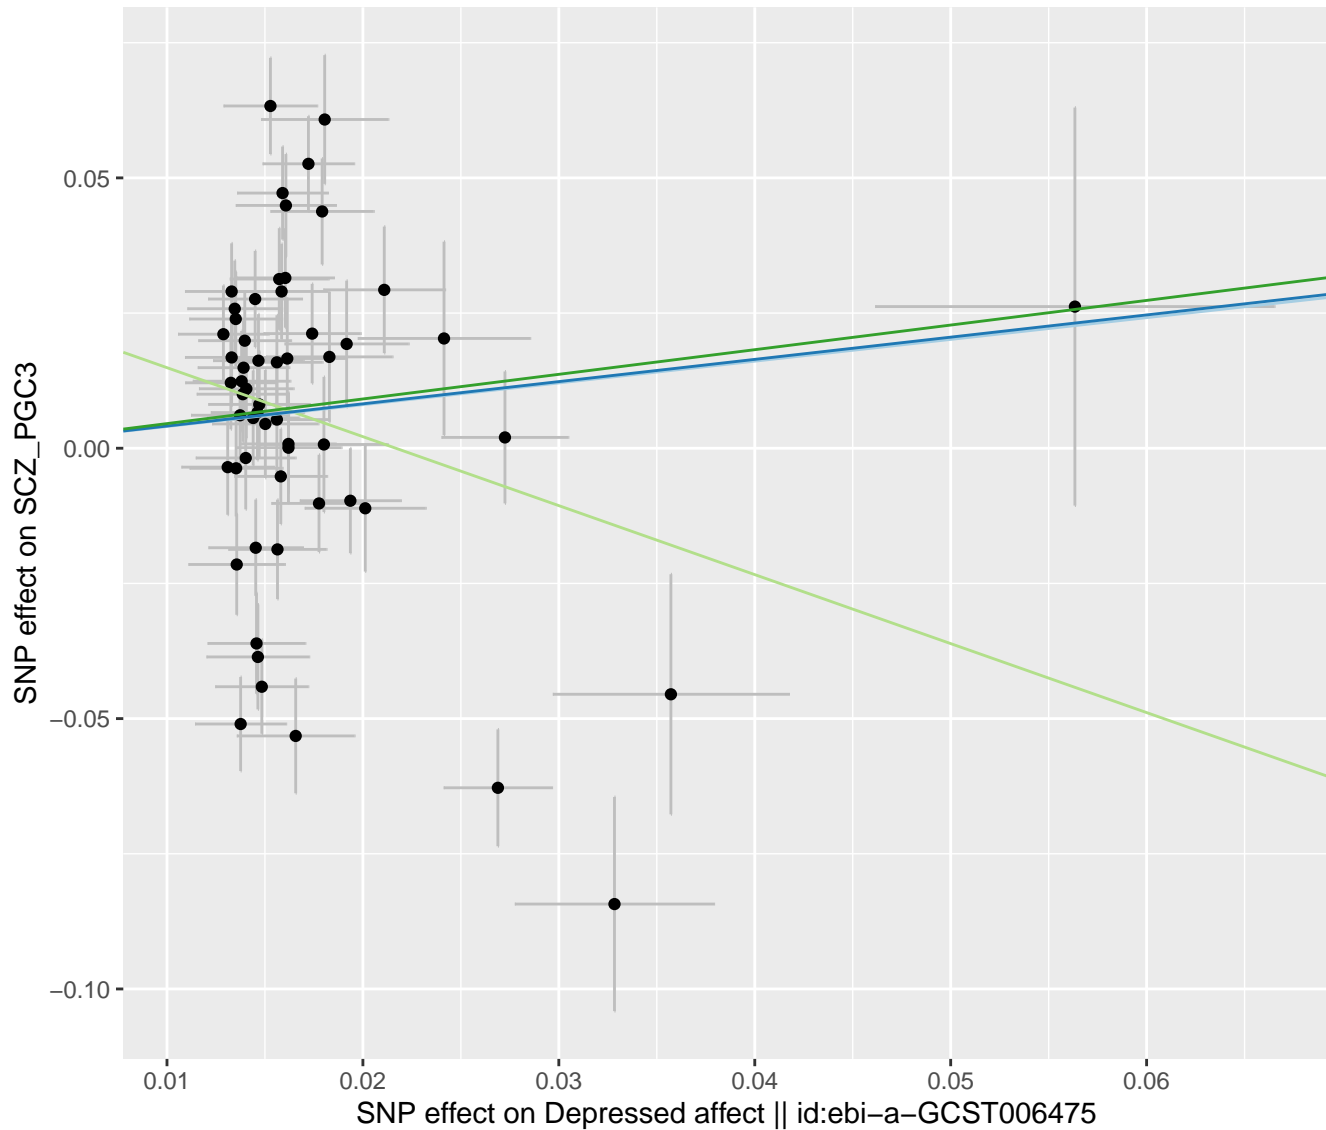

# MR Test

- Inverse variance weighted
- Maximum likelihood
- MR Egger
- Weighted median

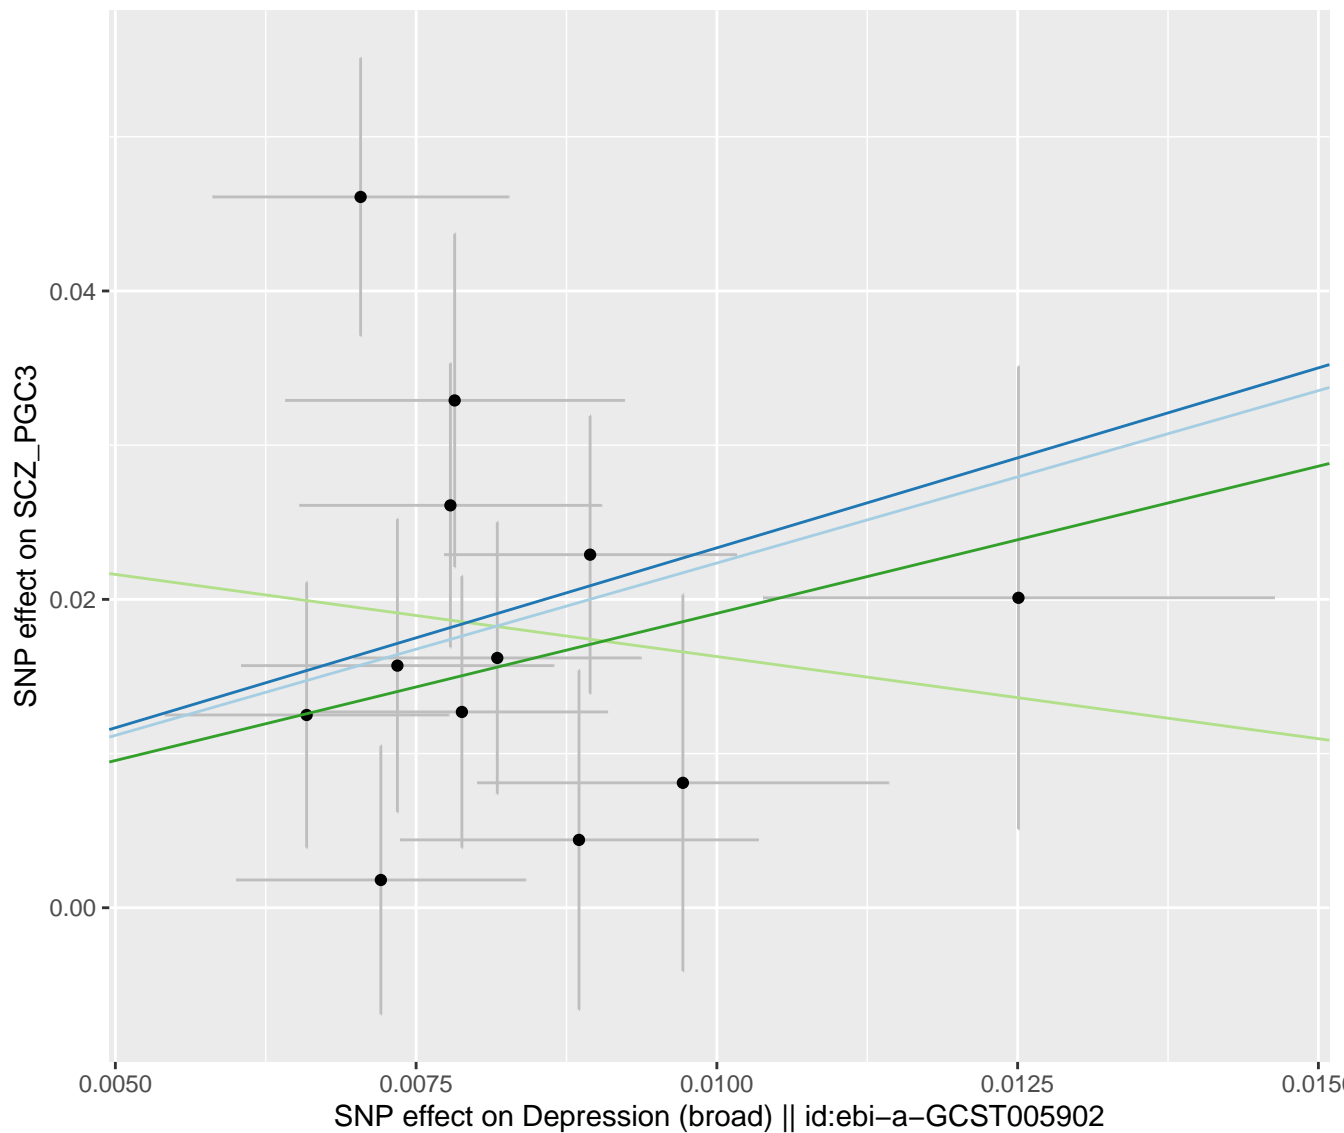

# MR Test

- Inverse variance weighted
- Maximum likelihood
- MR Egger
- Weighted median

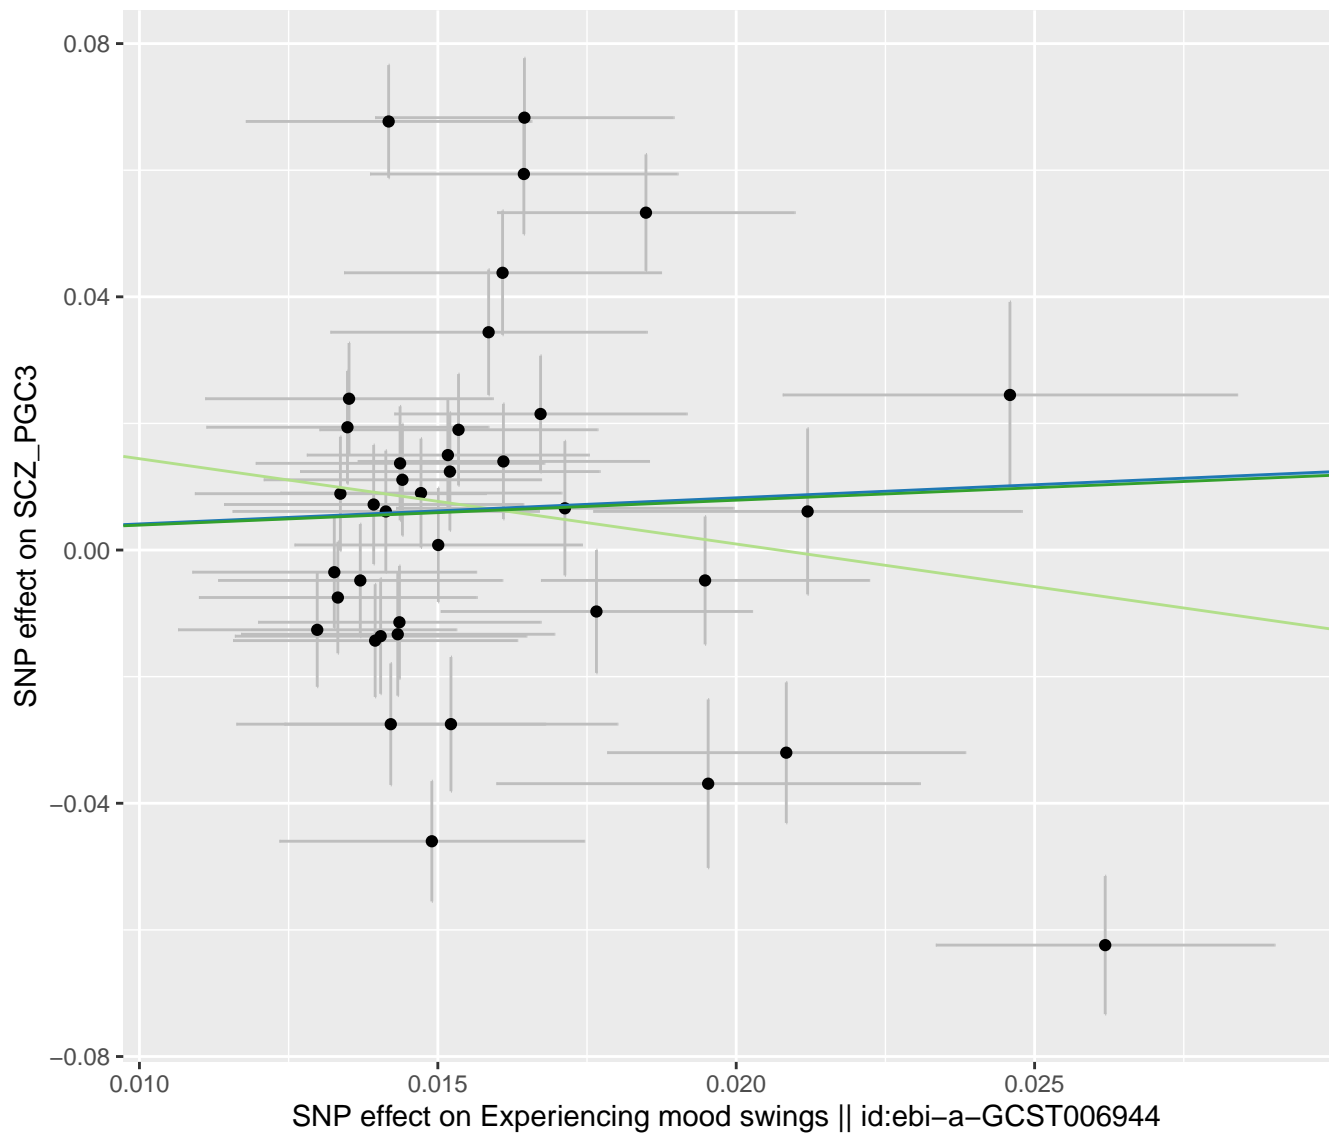

# MR Test

- Inverse variance weighted
- Maximum likelihood
- MR Egger
- Weighted median

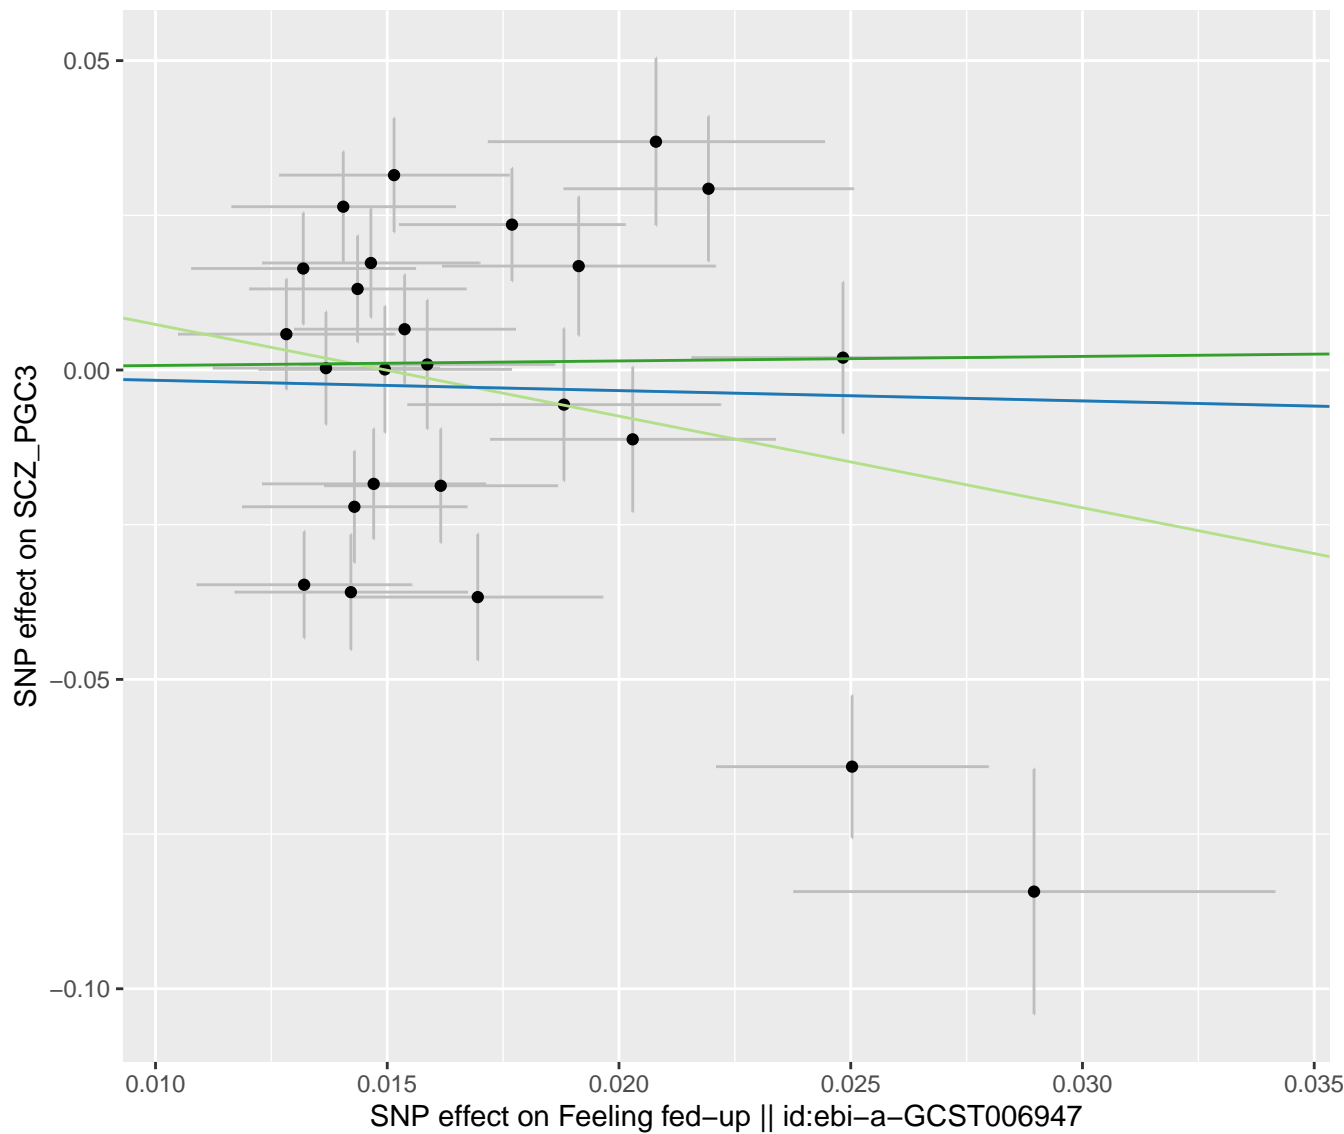

# MR Test

- Inverse variance weighted
- Maximum likelihood
- MR Egger
- Weighted median

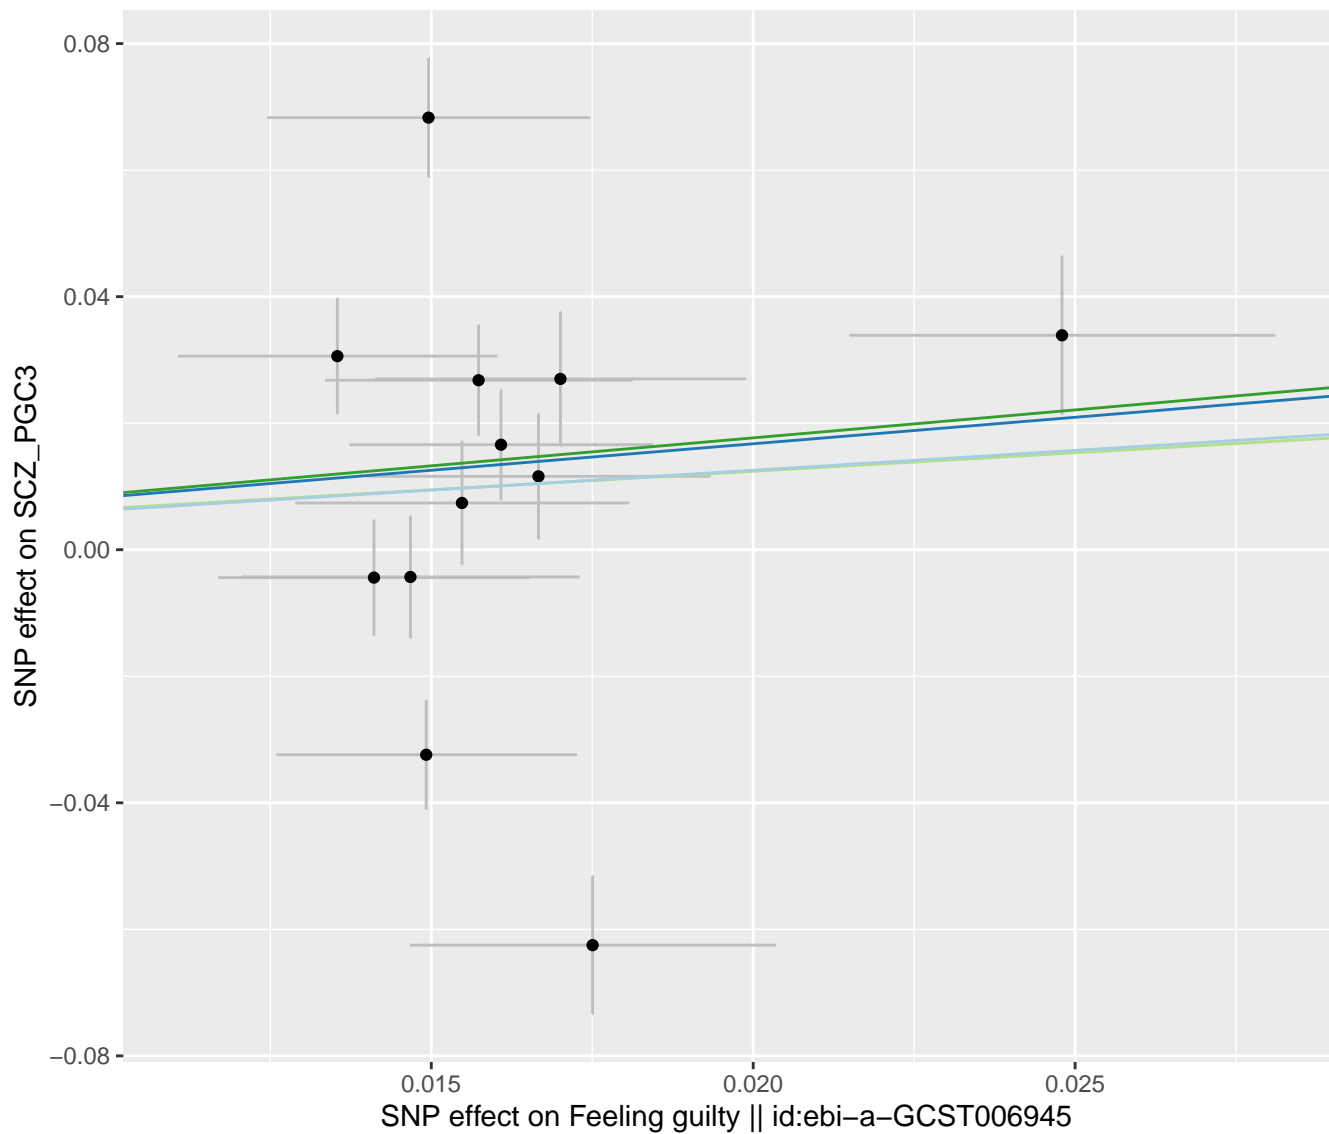

# MR Test

- Inverse variance weighted
- Maximum likelihood
- MR Egger
- Weighted median

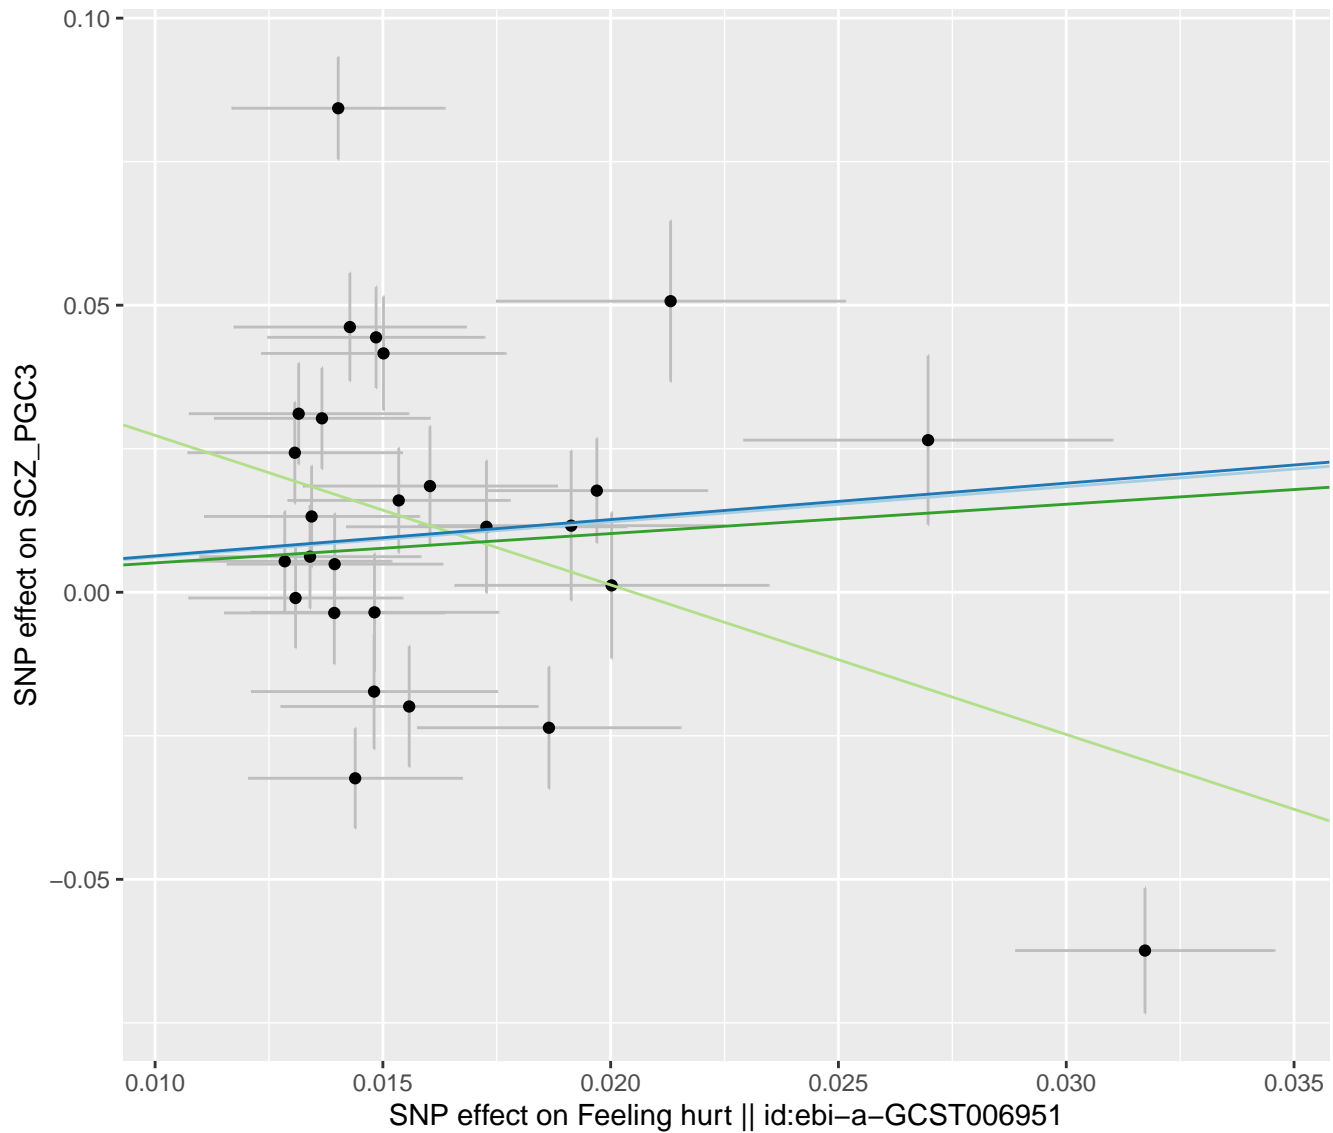



# MR Test

- Inverse variance weighted
- Maximum likelihood
- MR Egger
- Weighted median

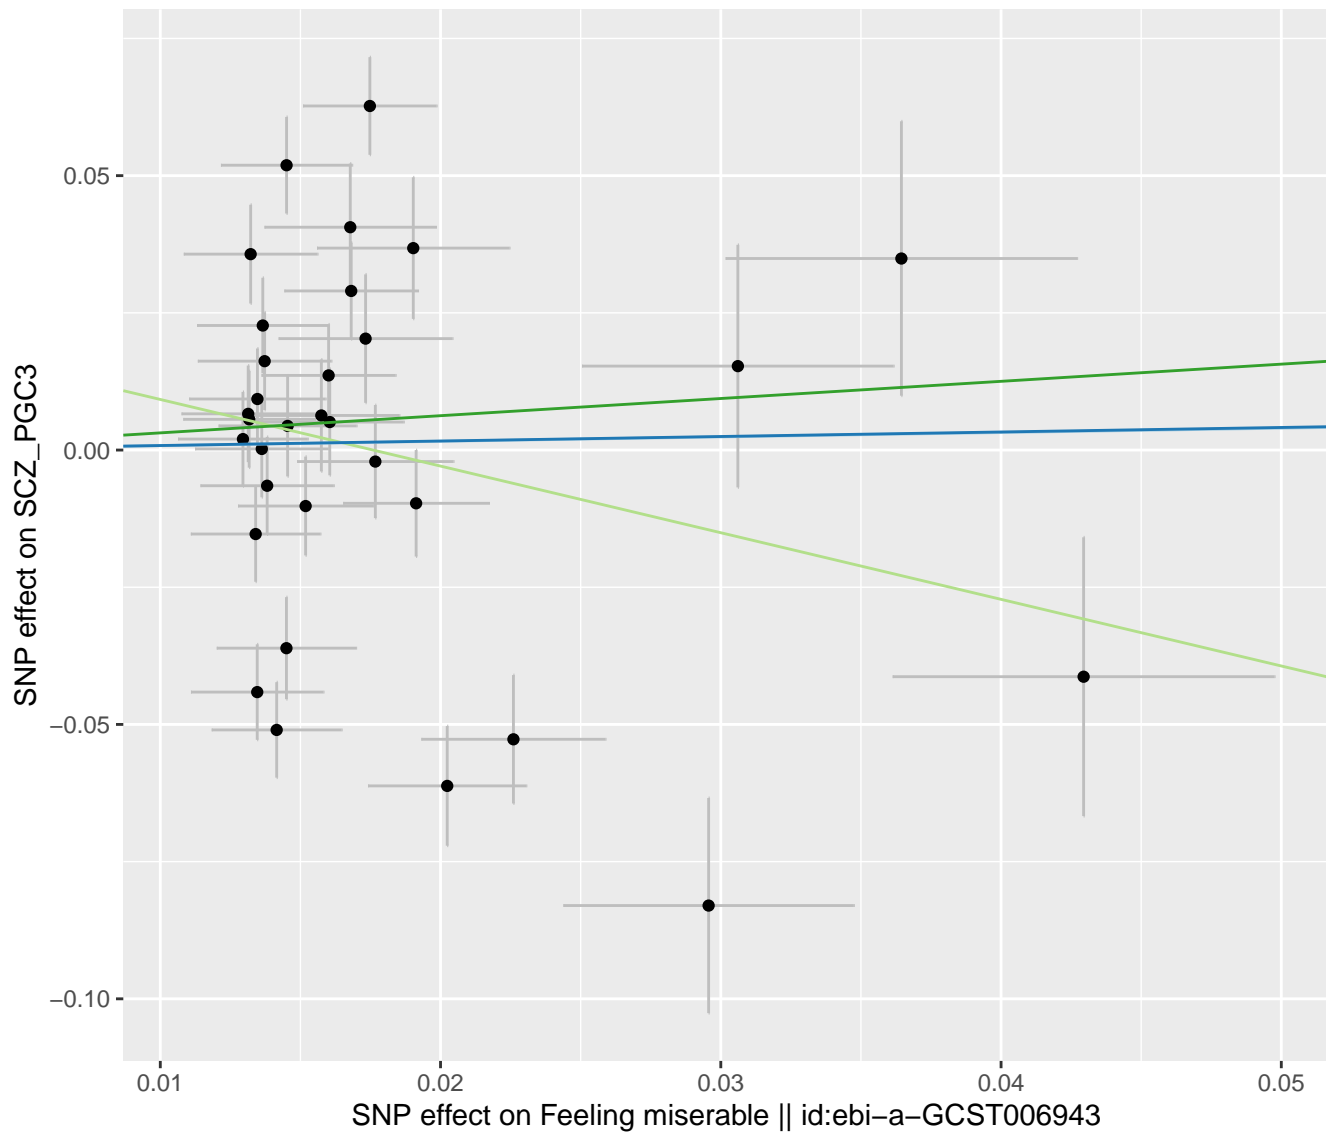

# MR Test

- Inverse variance weighted
- Maximum likelihood
- MR Egger
- Weighted median

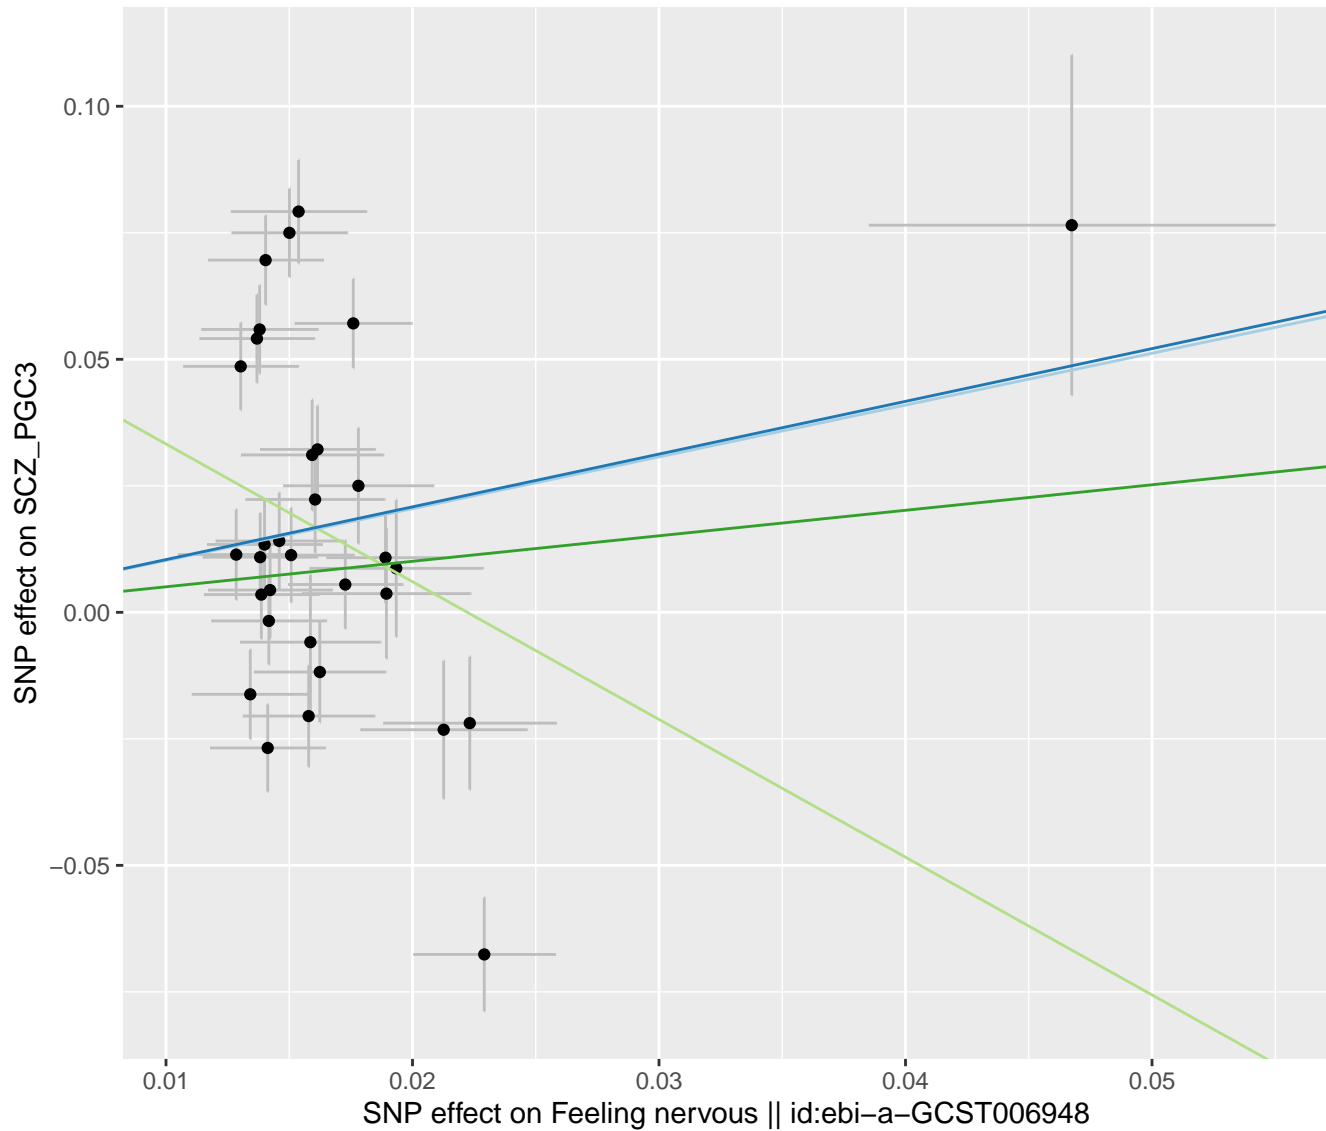

# MR Test

- Inverse variance weighted
- Maximum likelihood
- MR Egger
- Weighted median

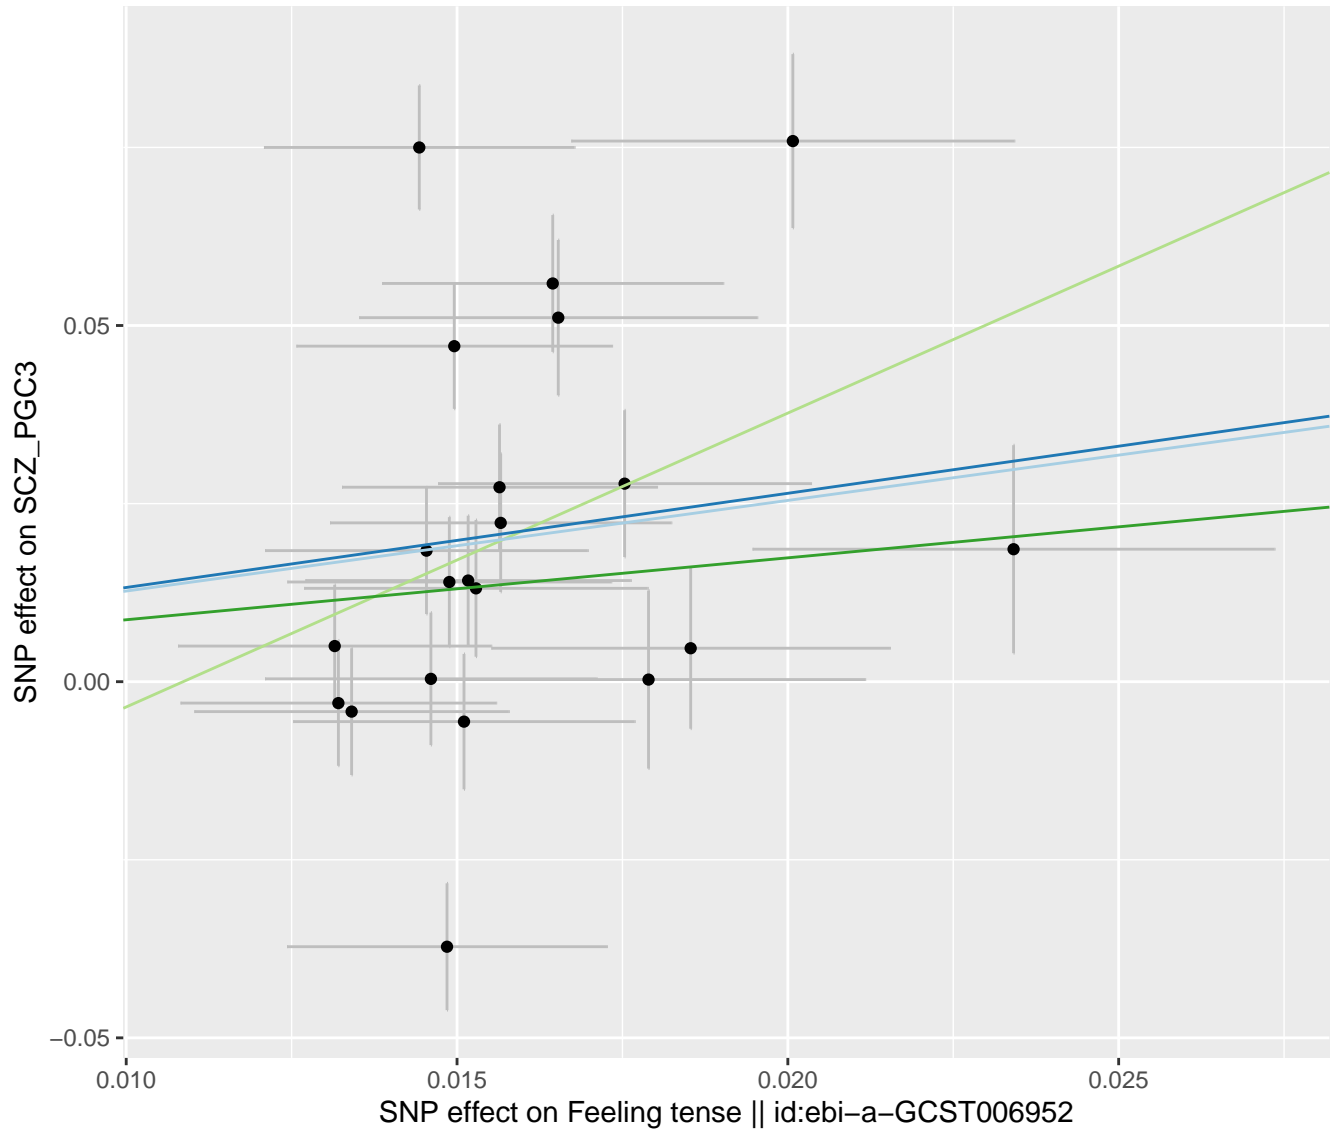

# MR Test

- Inverse variance weighted
- Maximum likelihood
- MR Egger
- Weighted median

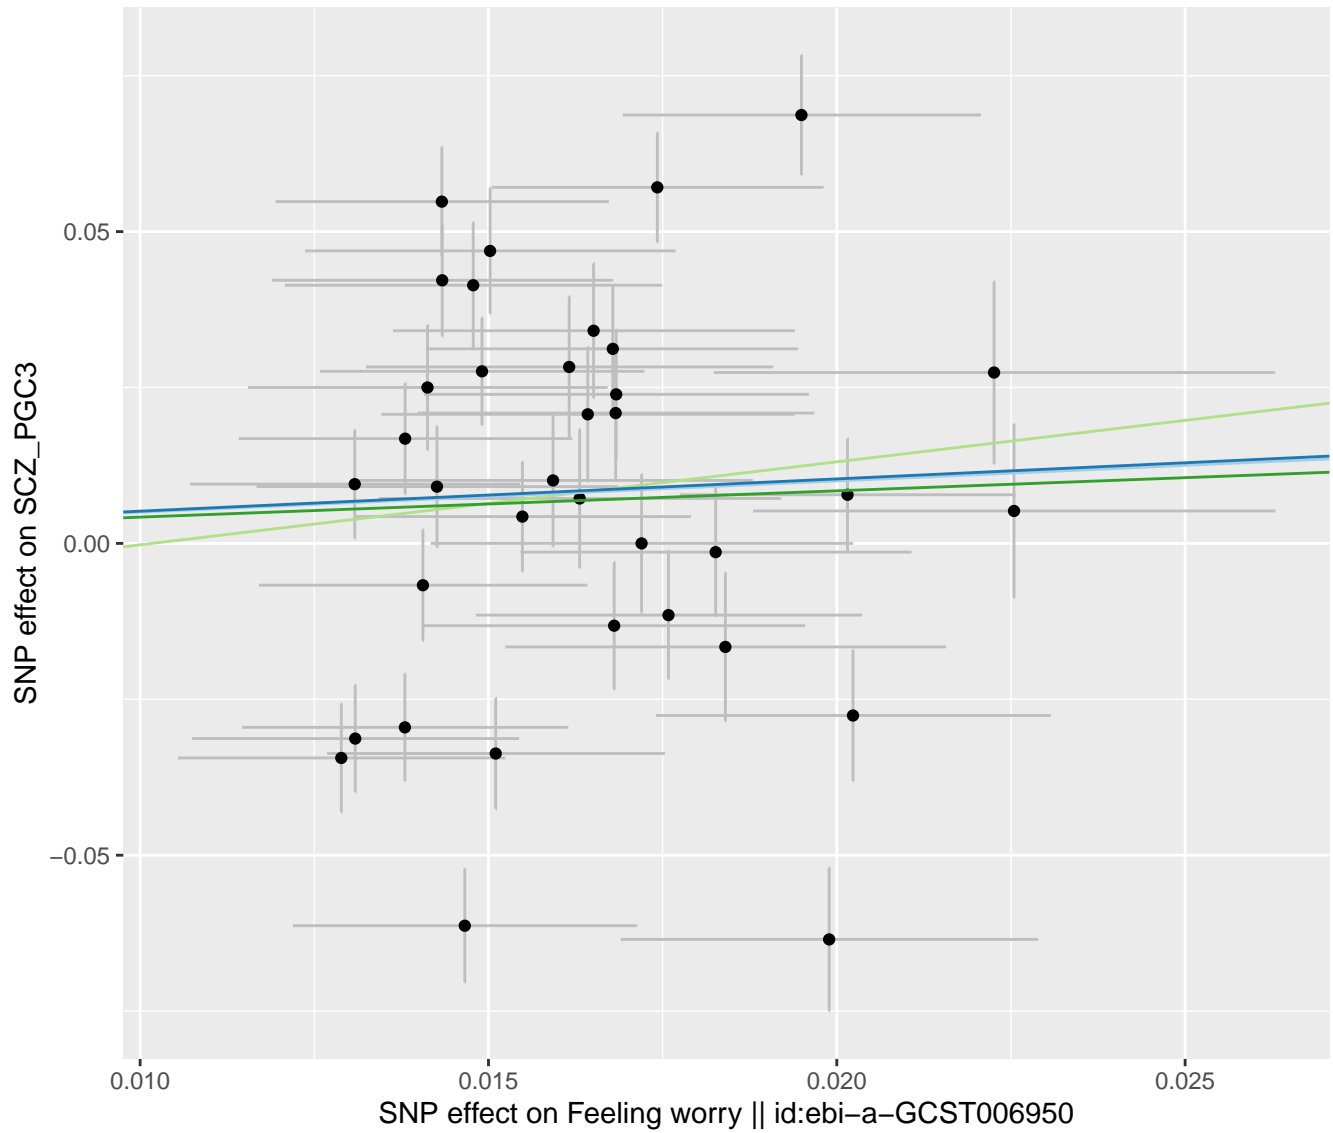

# MR Test

- Inverse variance weighted
- Maximum likelihood
- MR Egger
- Weighted median

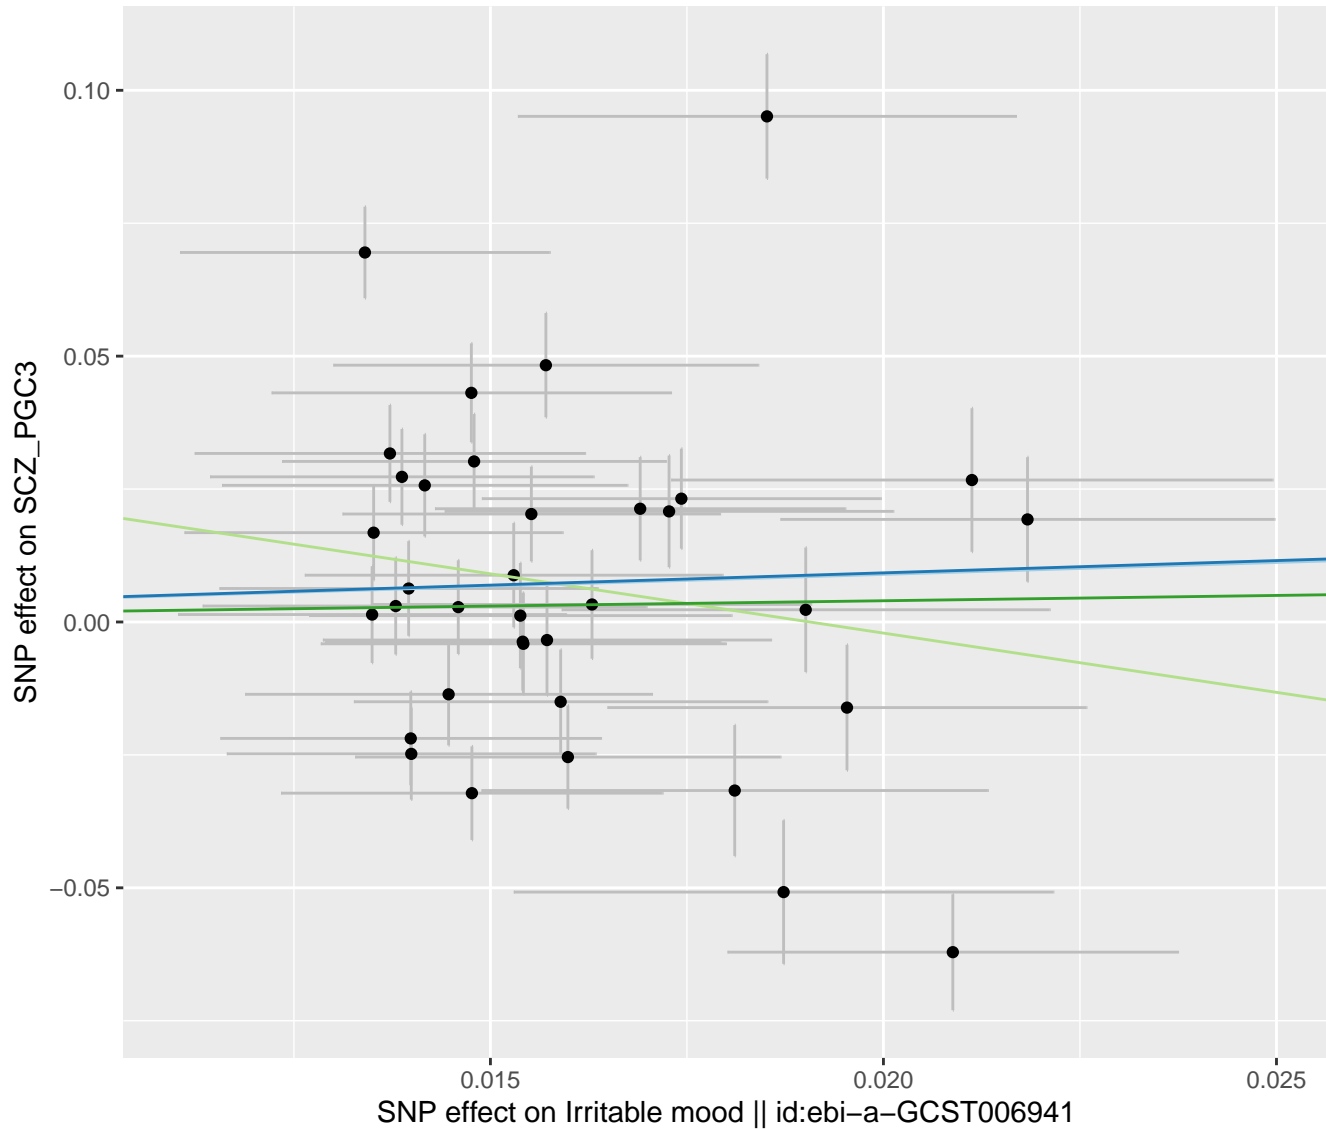

# MR Test

- Inverse variance weighted
- Maximum likelihood
- MR Egger
- Weighted median

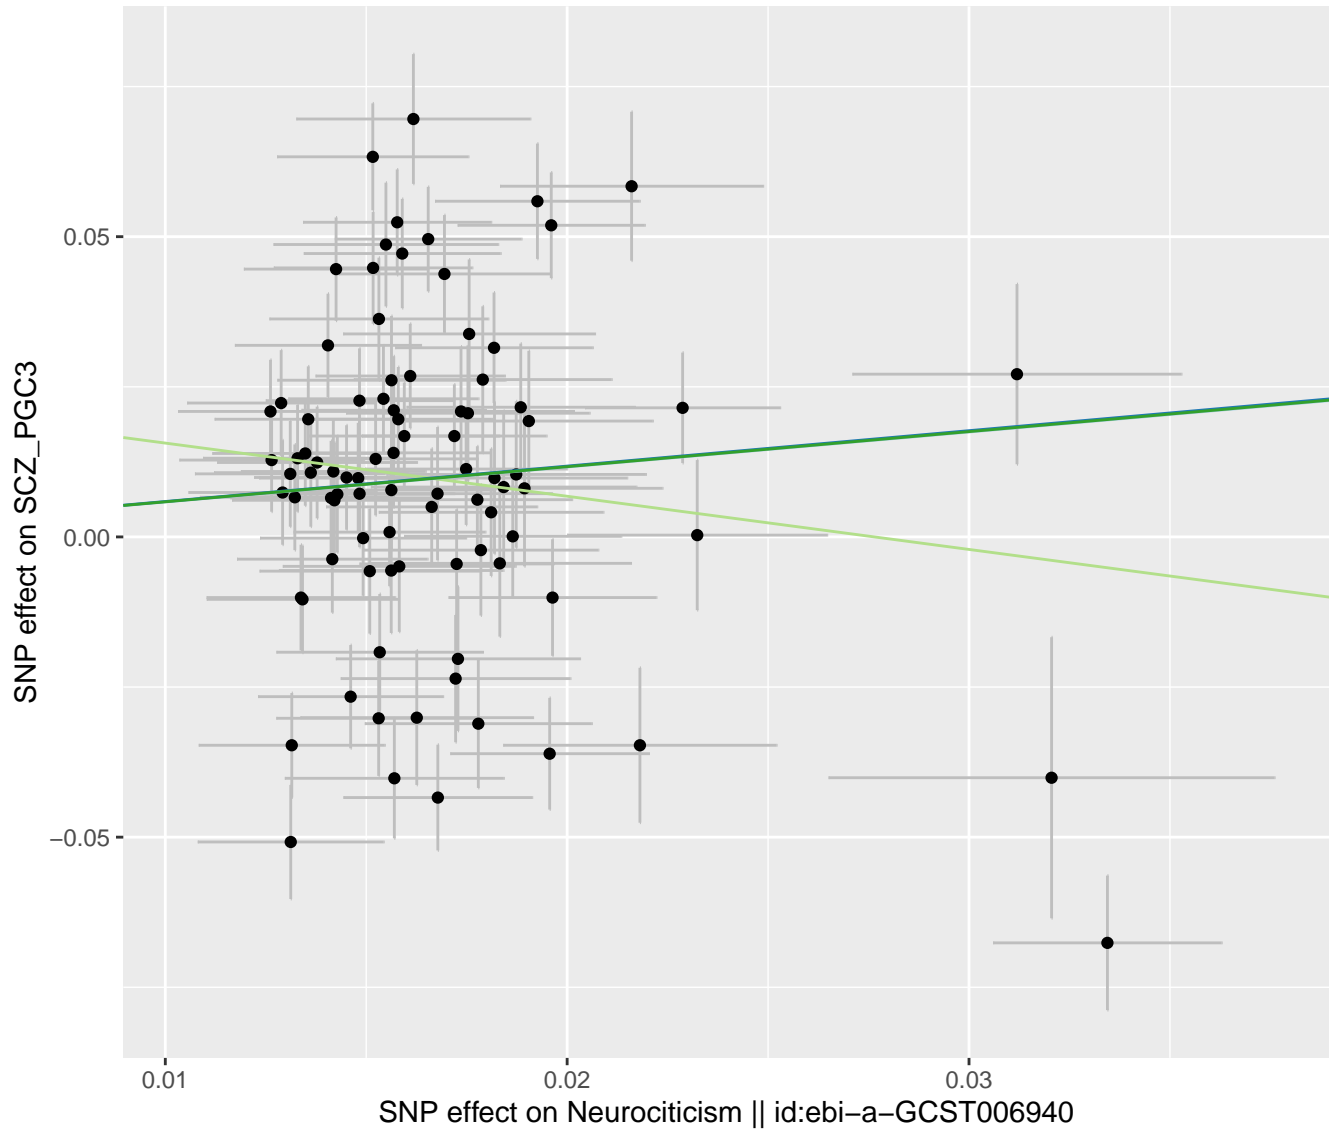

# MR Test

- Inverse variance weighted
- Maximum likelihood
- MR Egger
- Weighted median

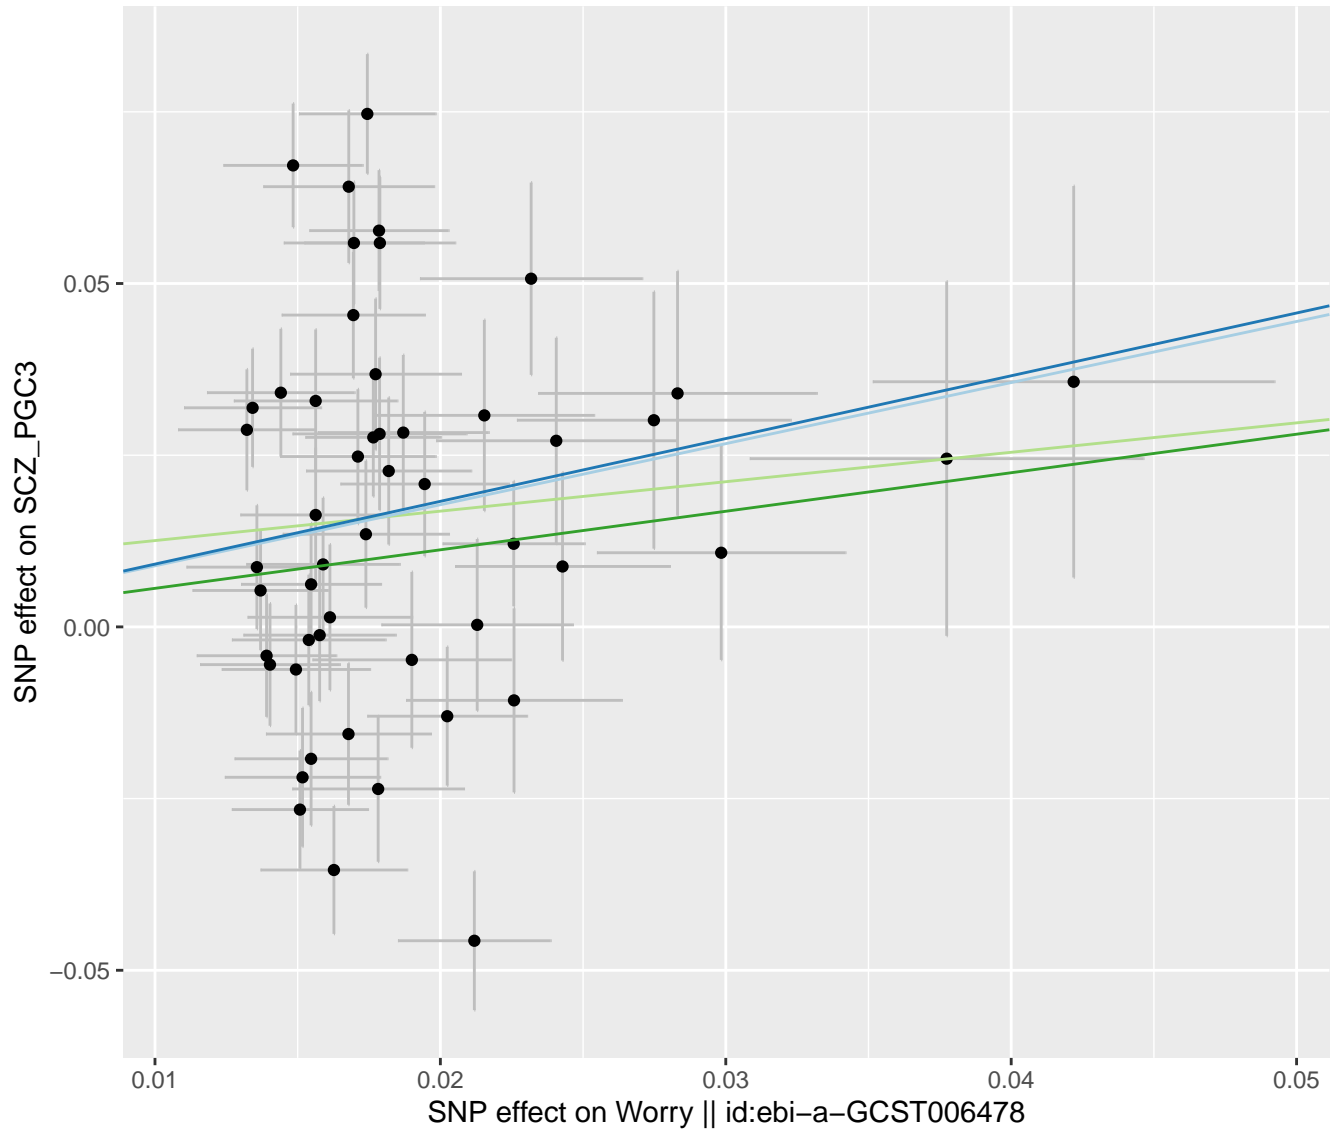

# MR Test

- Inverse variance weighted
- Maximum likelihood
- MR Egger
- Weighted median

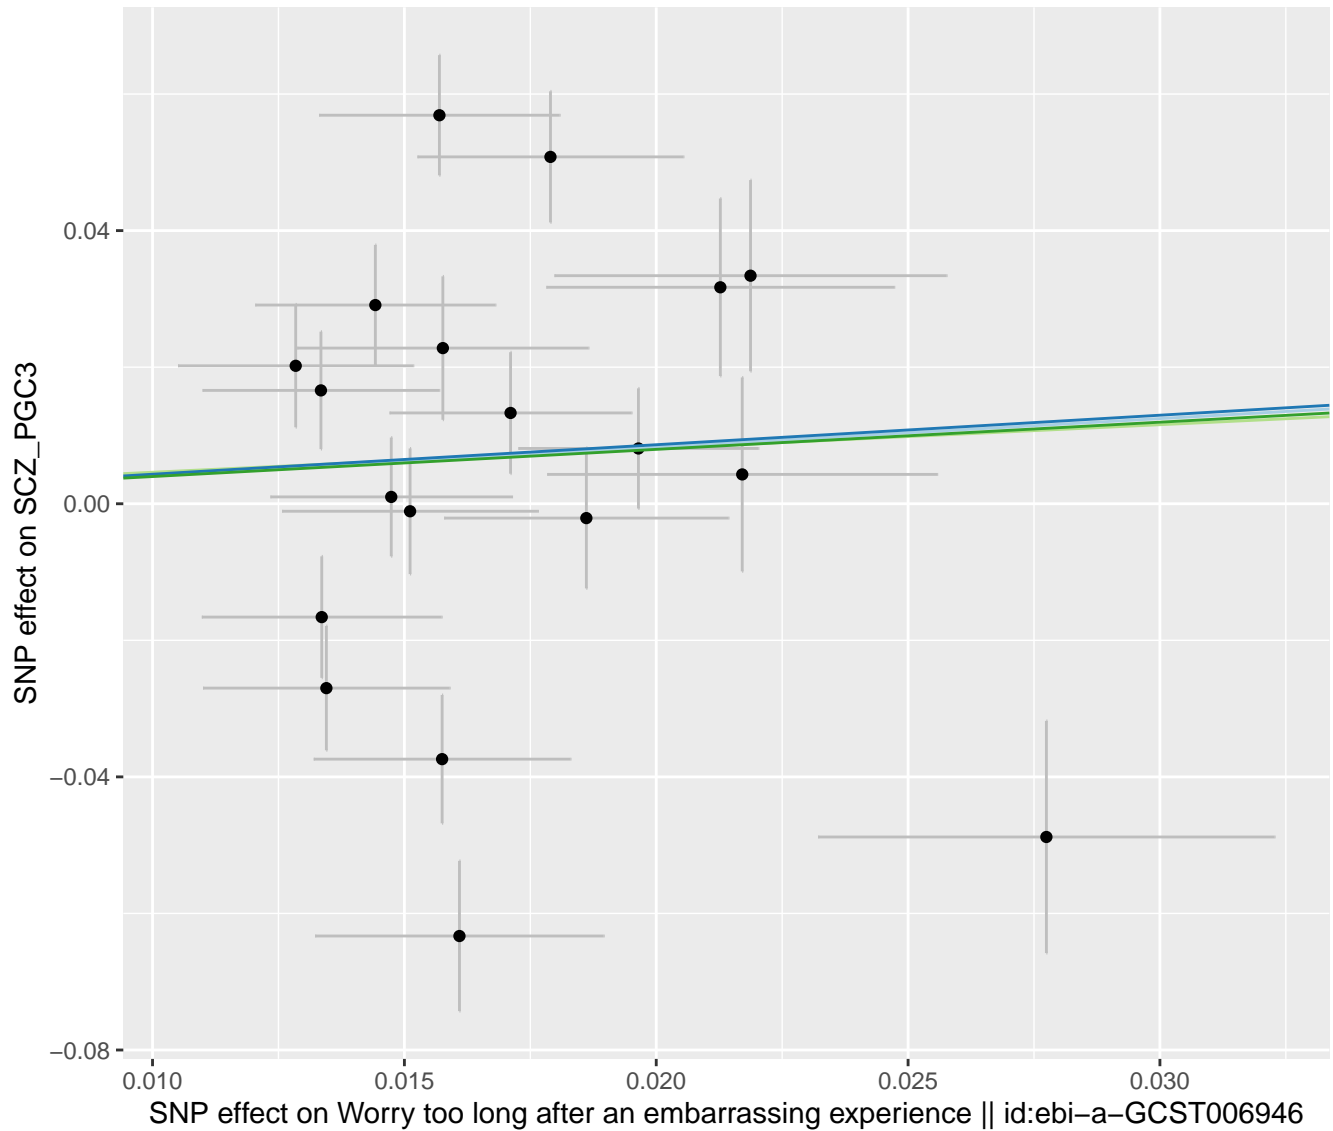



# MR Test

- Inverse variance weighted
- Maximum likelihood
- MR Egger
- Weighted median

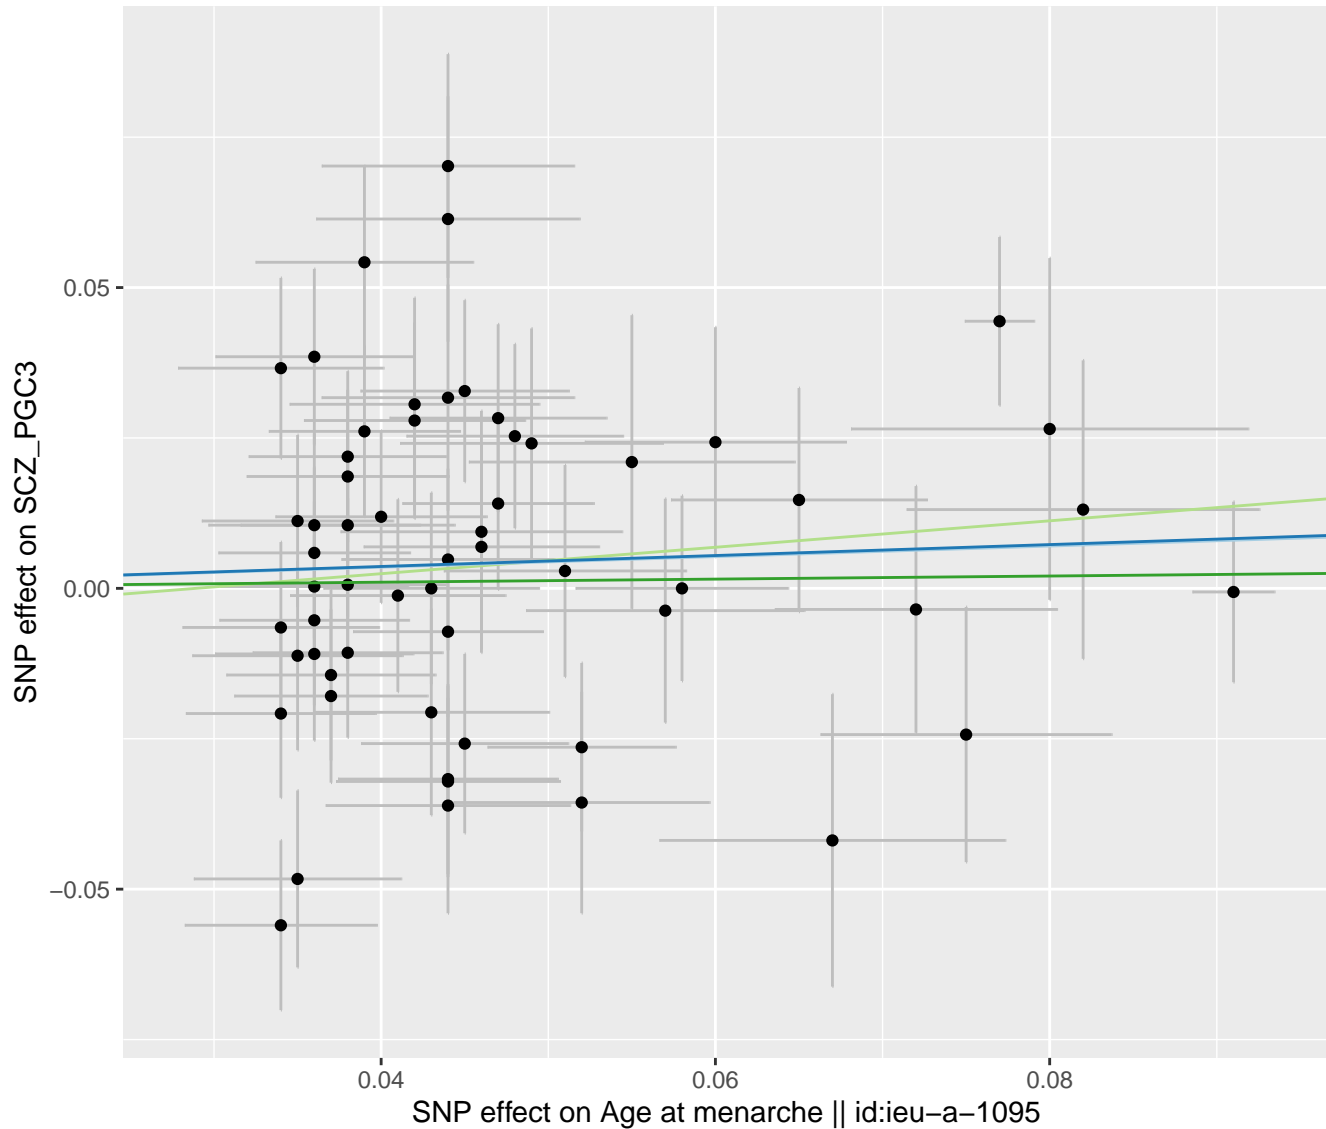

# MR Test

- Inverse variance weighted
- Maximum likelihood
- MR Egger
- Weighted median

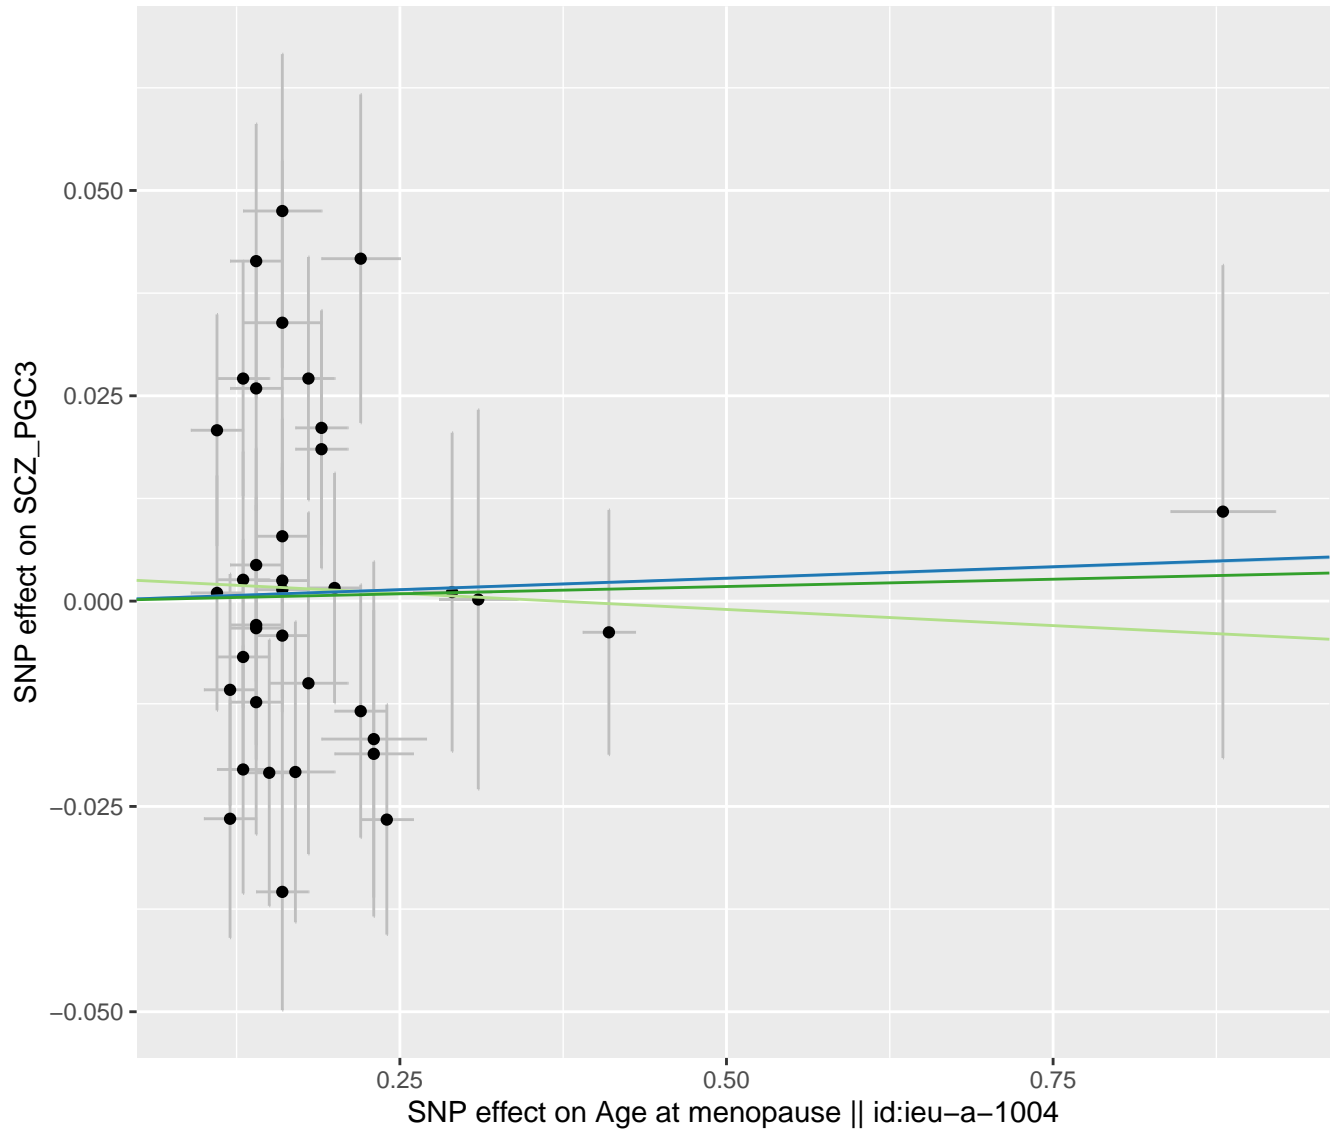

Supplement: Supplementary file [file 2020.09.12.20192922-5.zip]
