# Supplementary material
Source: bioRxiv or medRxiv preprint supplement (http://medrxiv.stage.highwire.org/highwire/filestream/96583/field_highwire_adjunct_files/4/2020.09.12.20192922-5.zip)

chr1:207912183–208024083; wave2; 50kb flank

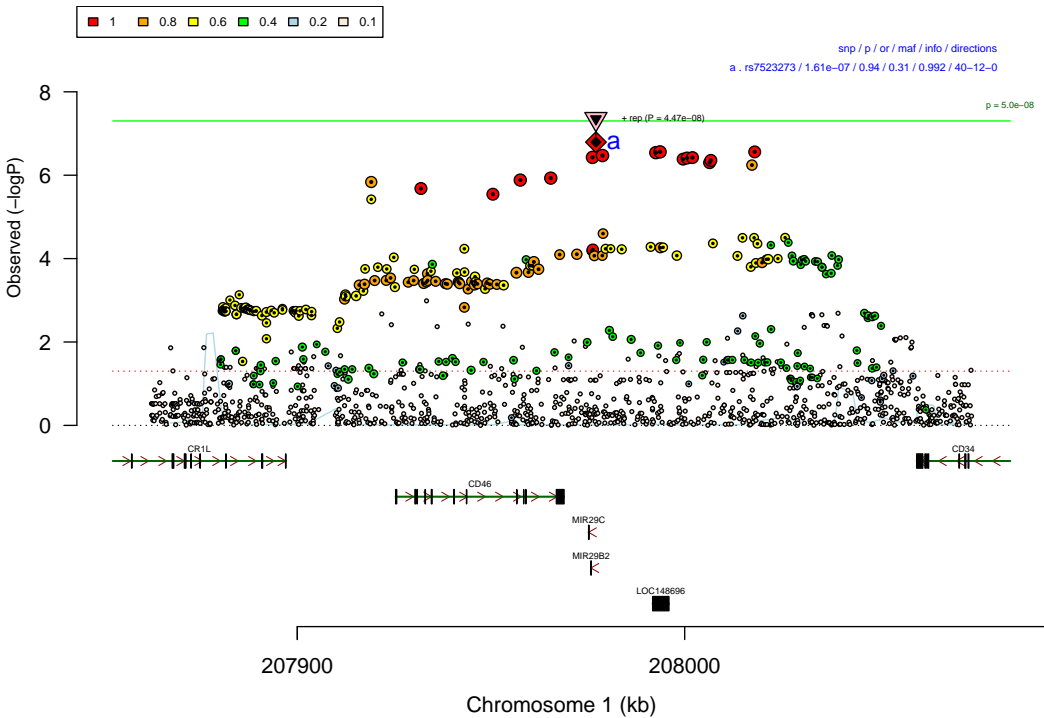

chr1:207912183–208024083; wave3; 50kb flank

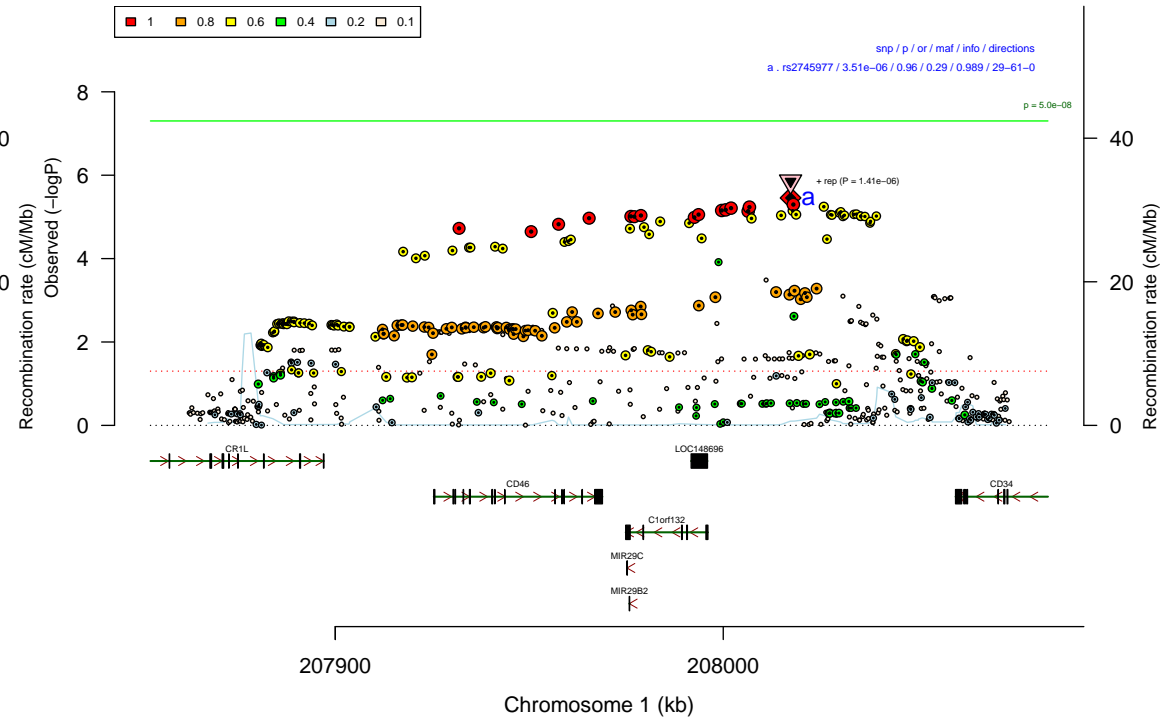

chr1:207912183–208024083; wave2; 2mb flank

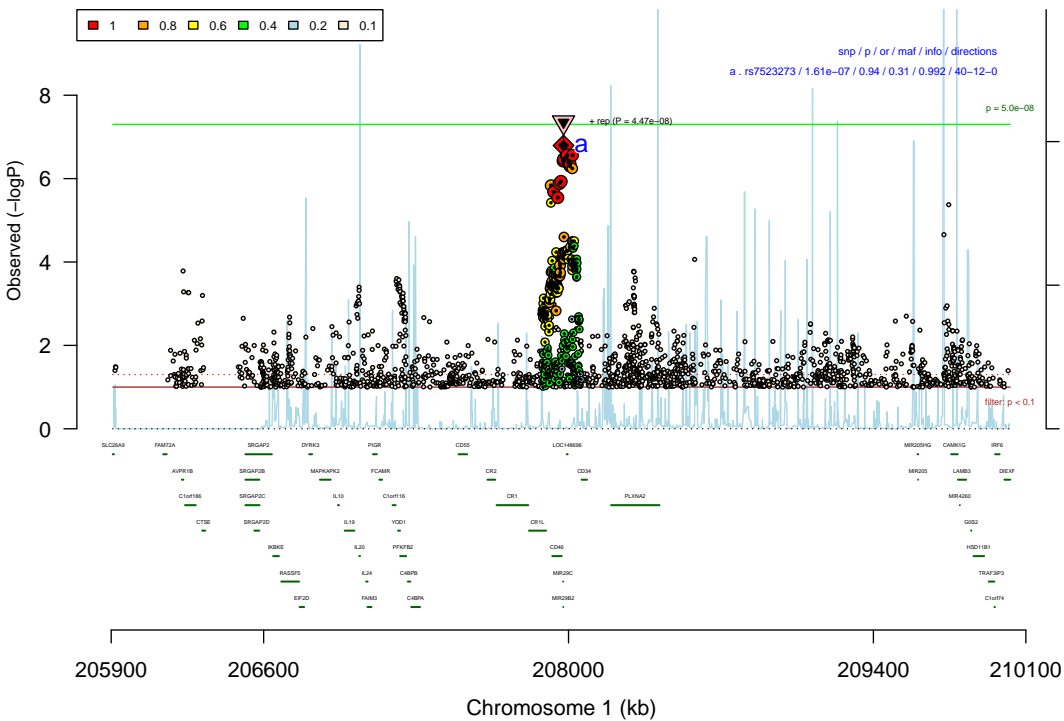

chr1:207912183–208024083; wave3; 2mb flank

chr1:243555105–243555105; wave2; 50kb flank

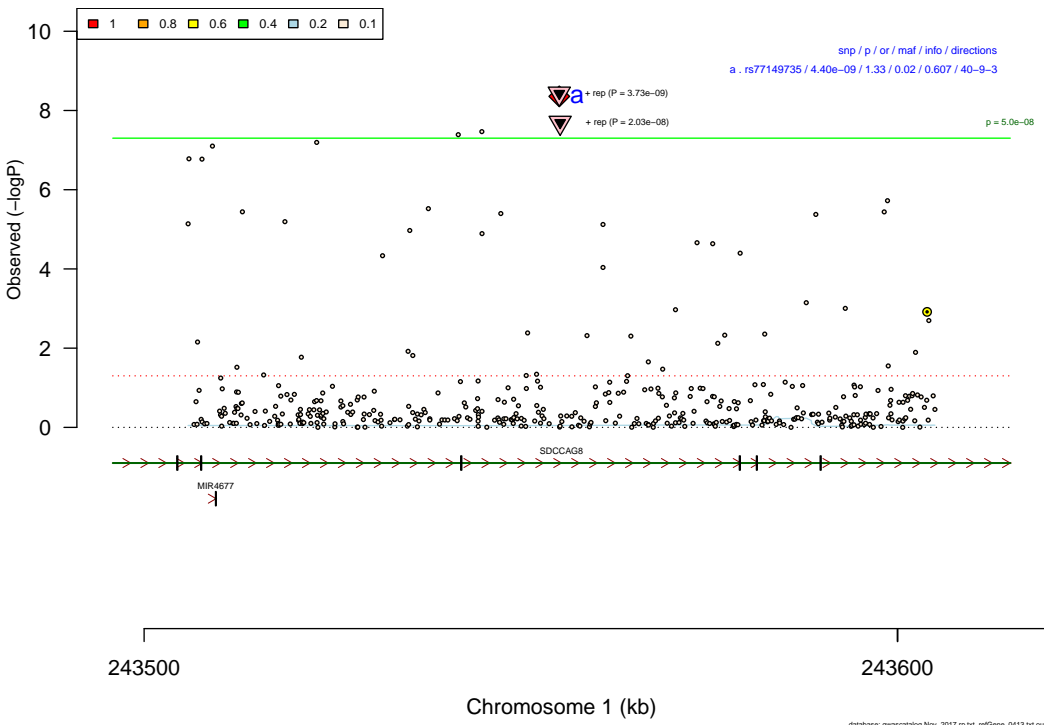

chr1:243555105–243555105; wave3; 50kb flank

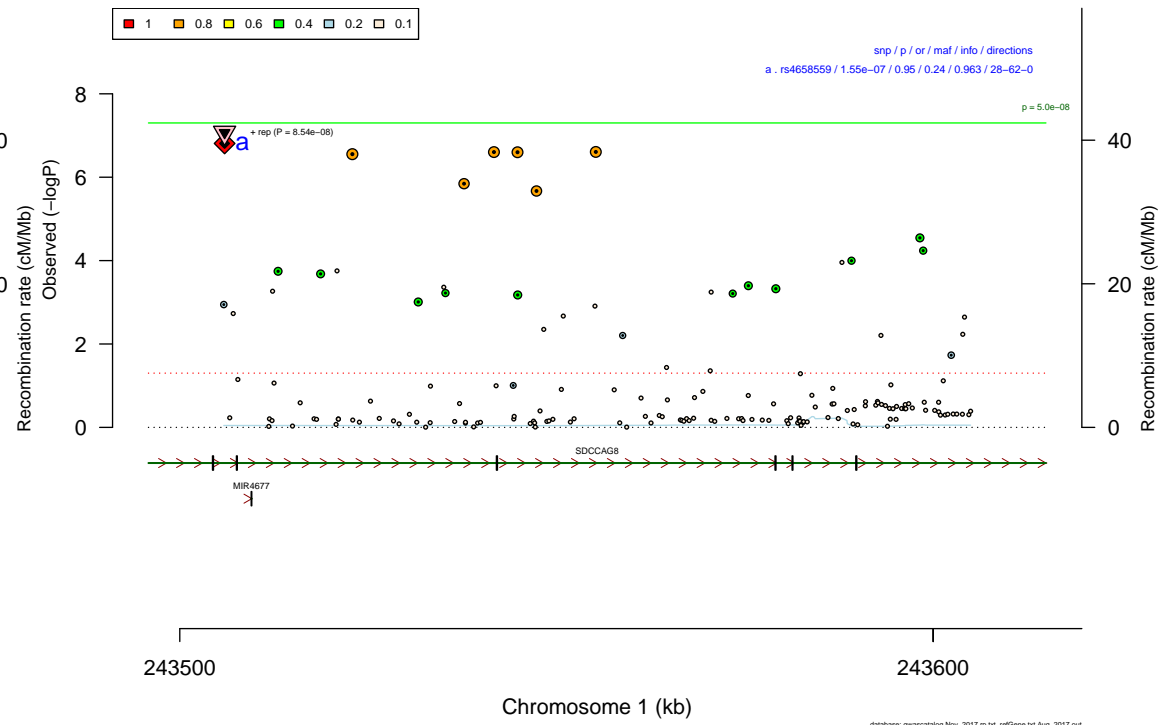

chr1:243555105–243555105; wave2; 2mb flank

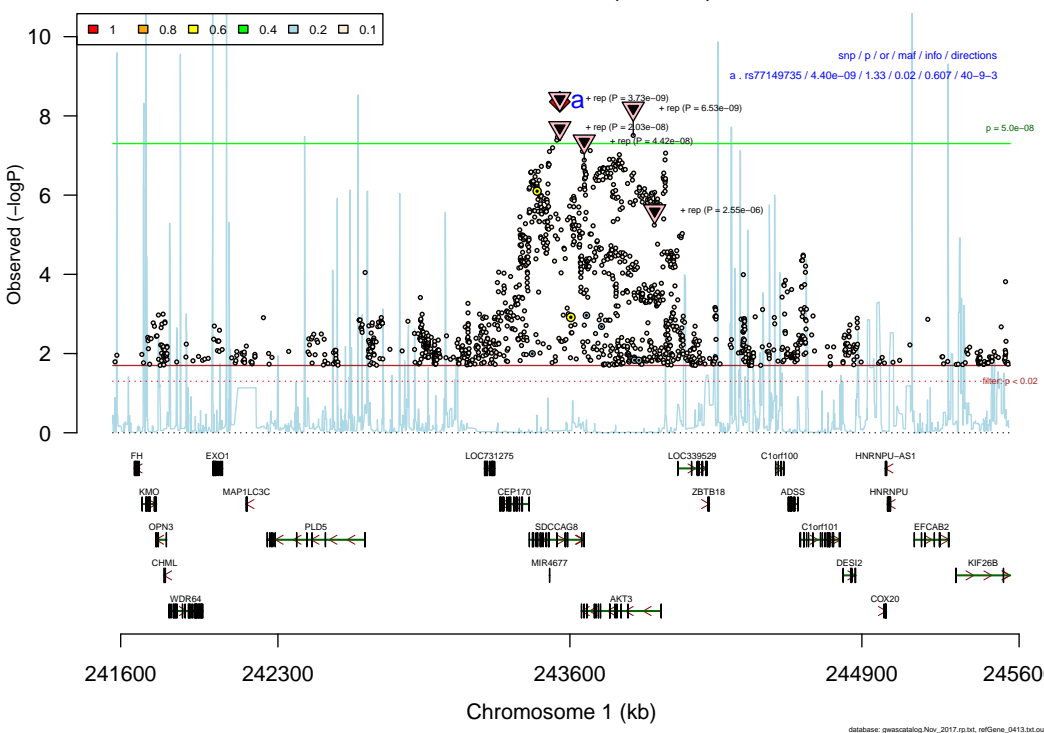

chr1:243555105–243555105; wave3; 2mb flank

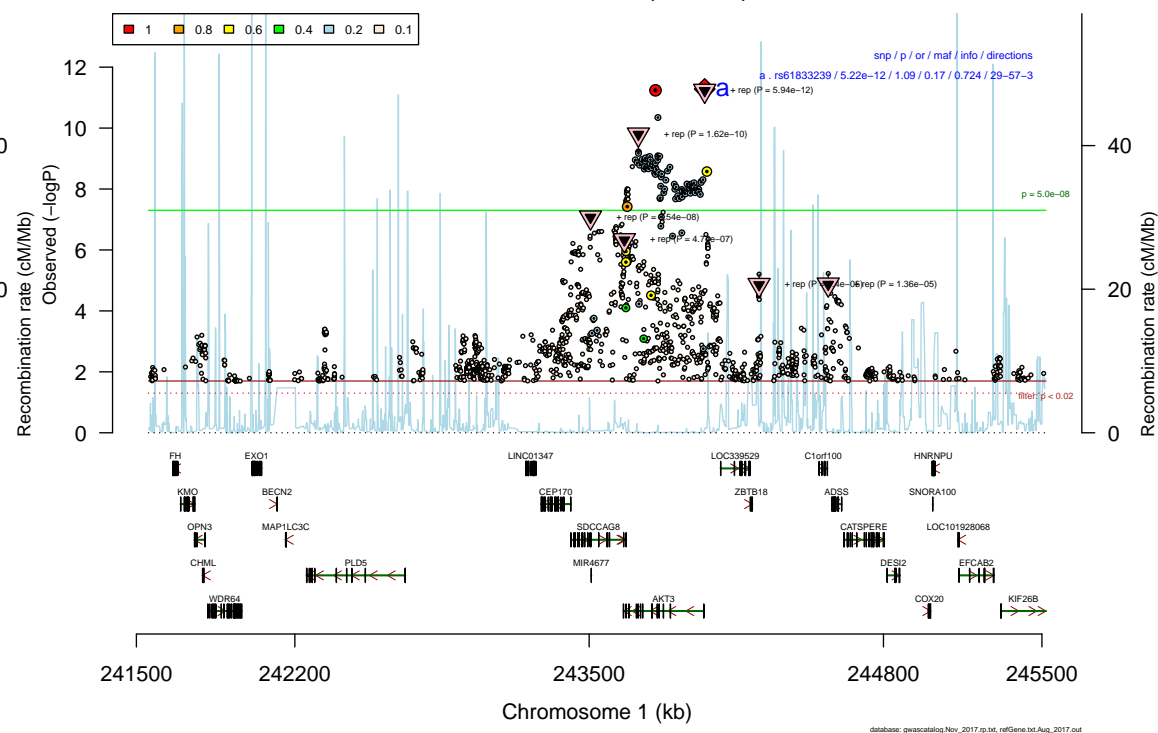

chr2:72357335–72368185; wave2; 50kb flank

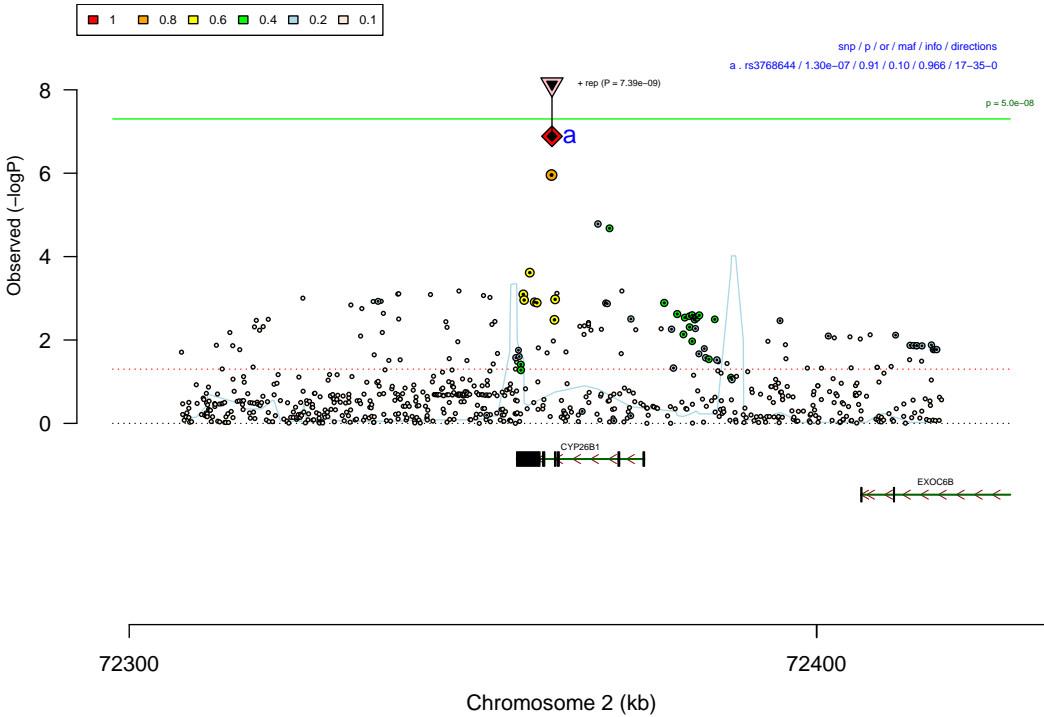

chr2:72357335–72368185; wave3; 50kb flank

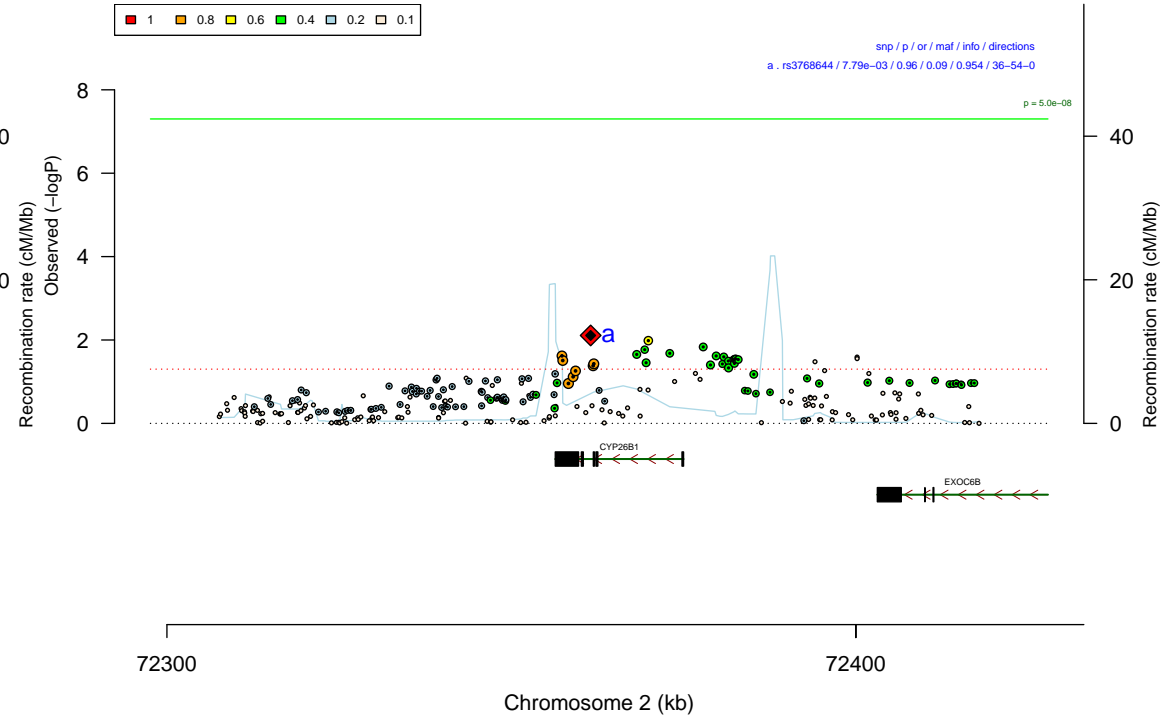

chr2:72357335–72368185; wave2; 2mb flank

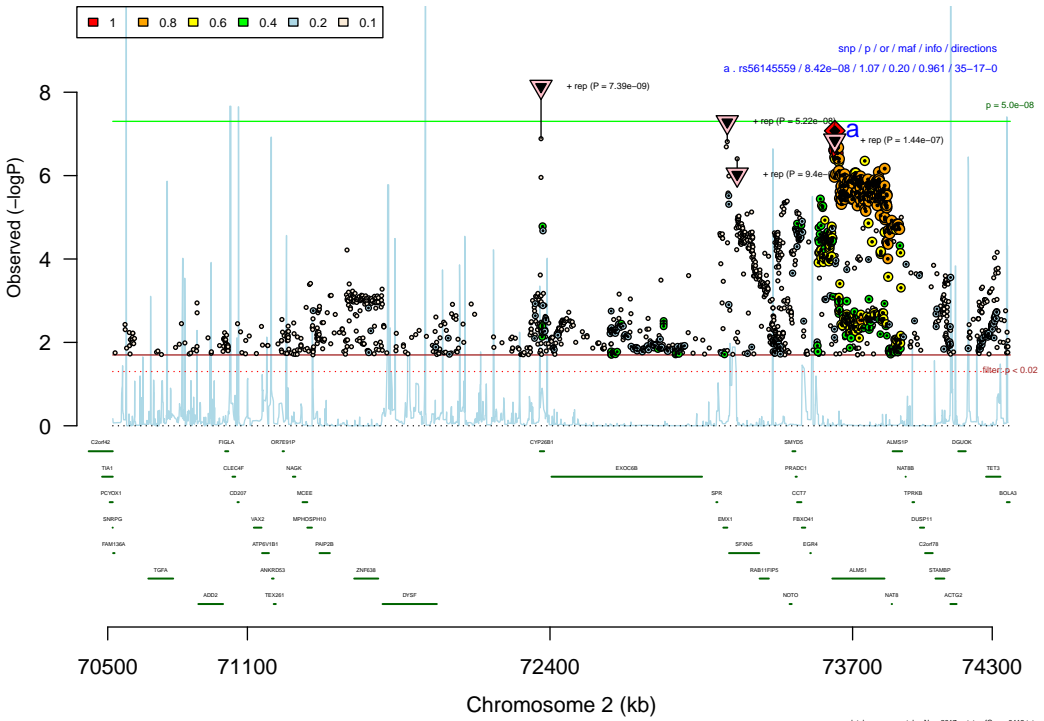

chr2:72357335–72368185; wave3; 2mb flank

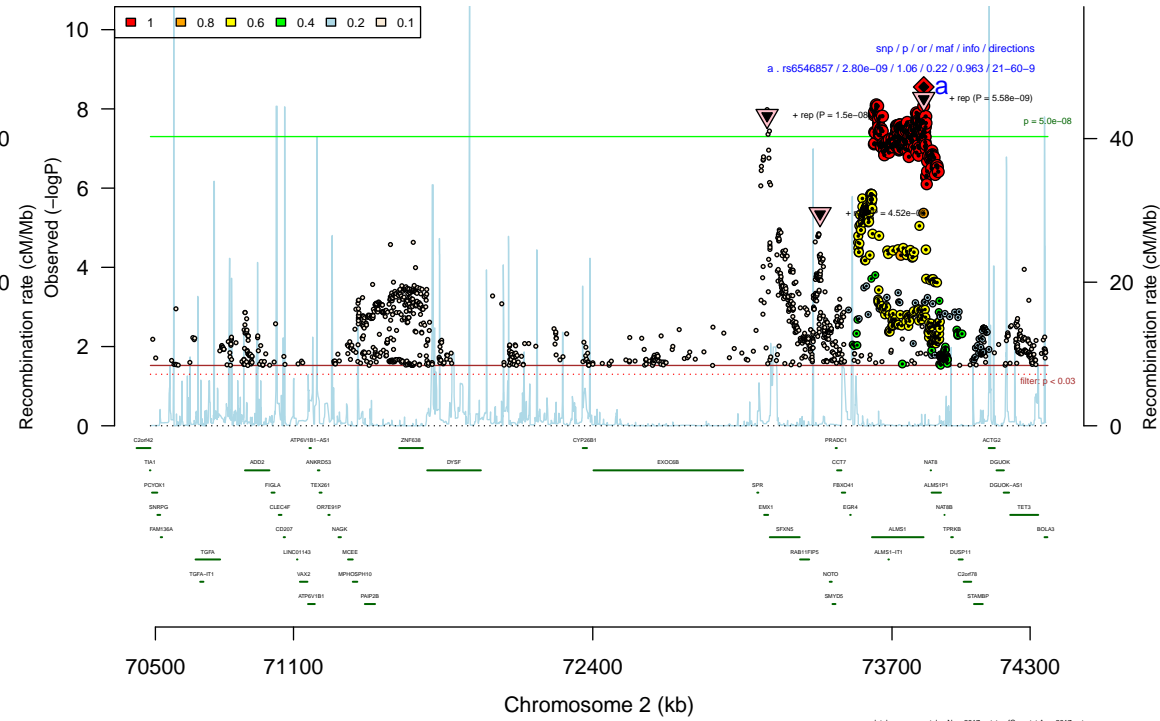

chr2:149390778–149520178; wave2; 50kb flank

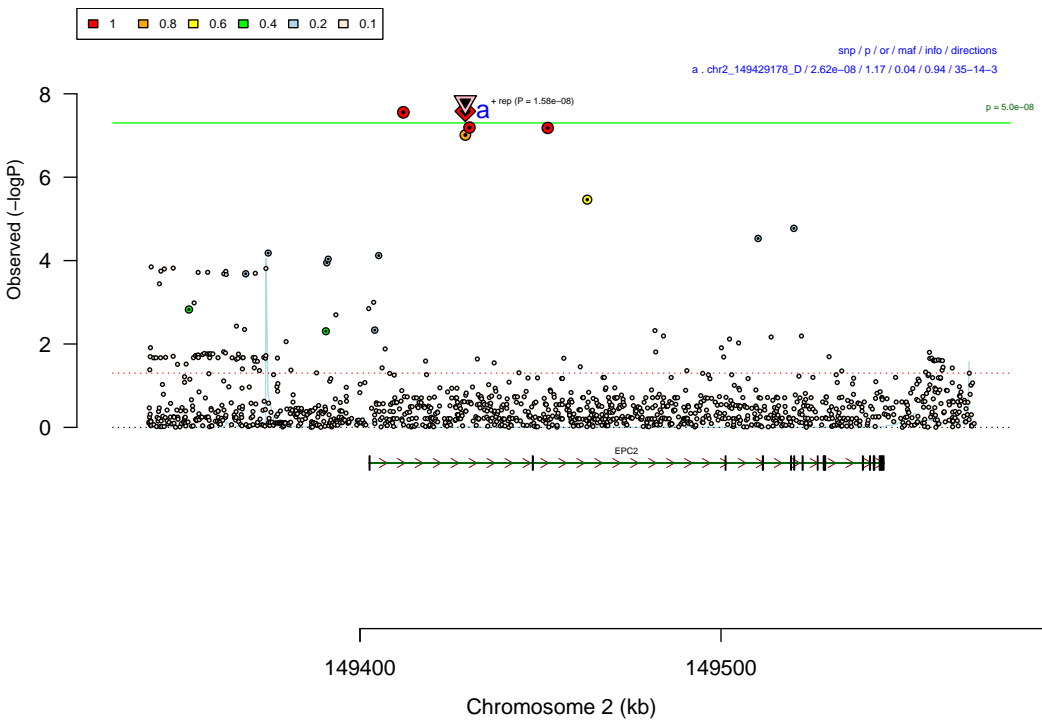

chr2:149390778–149520178; wave3; 50kb flank

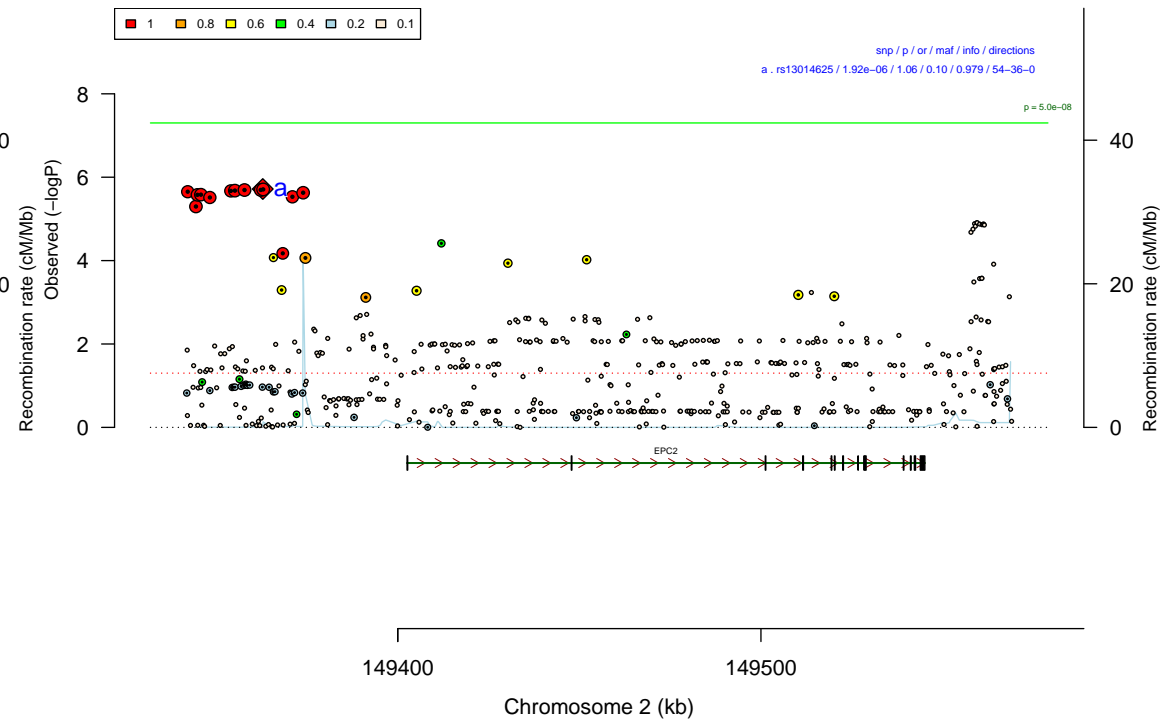

chr2:149390778–149520178; wave2; 2mb flank

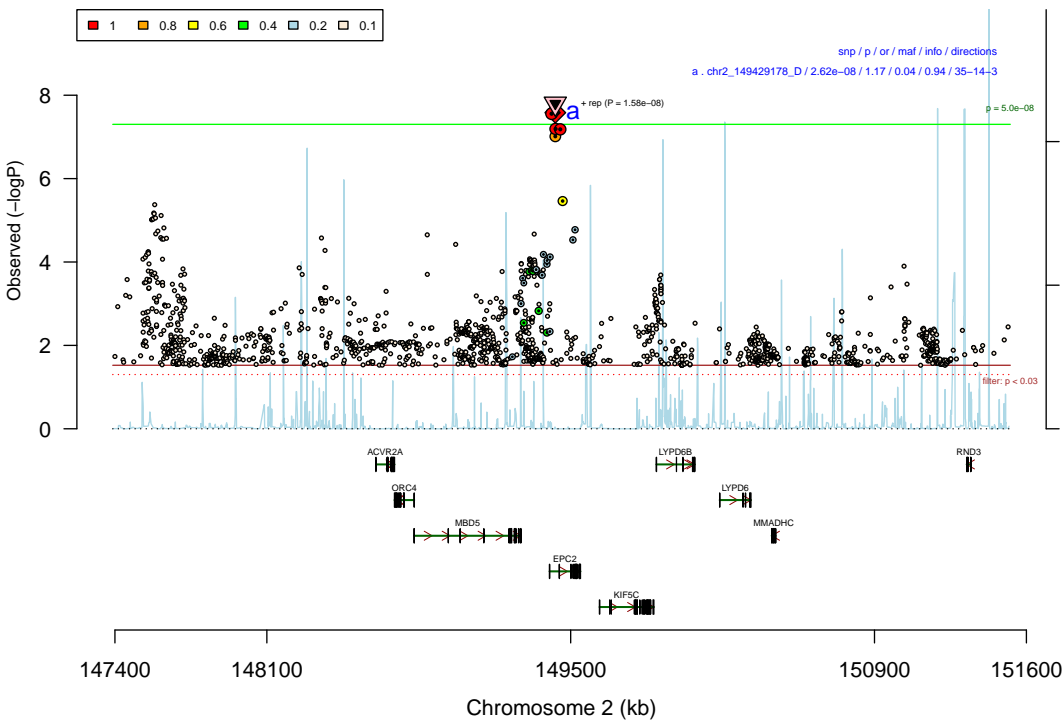

chr2:149390778–149520178; wave3; 2mb flank

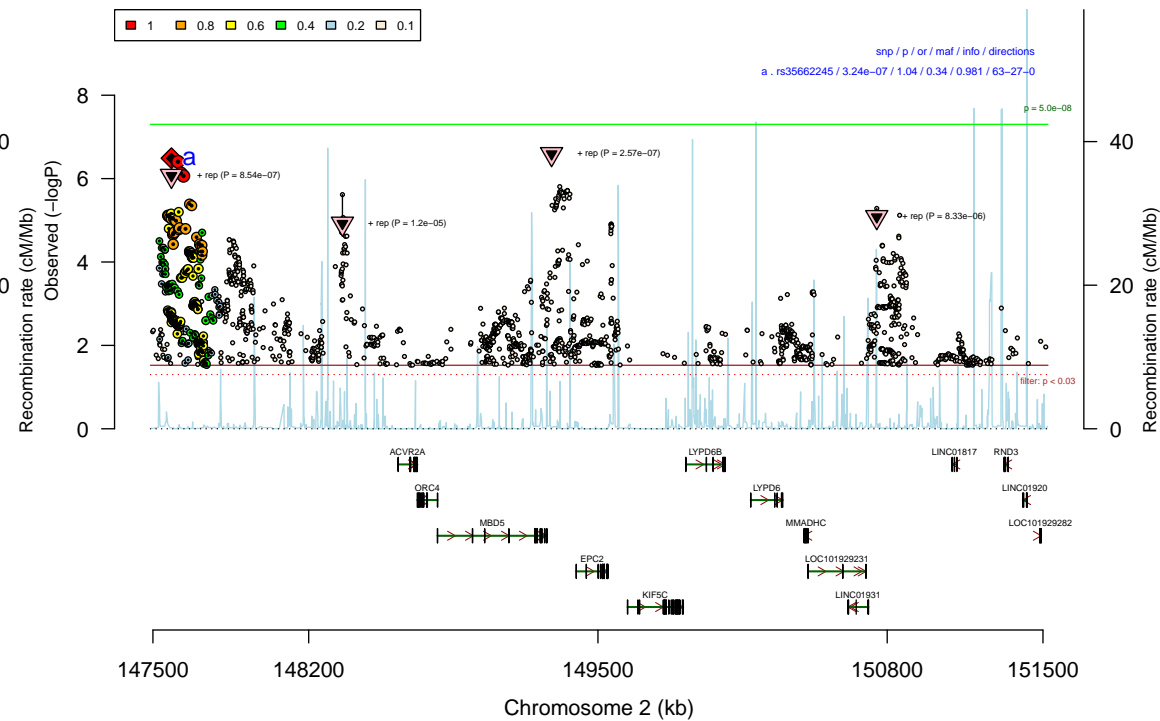



chr9:84630941–84813641; wave2; 50kb flank

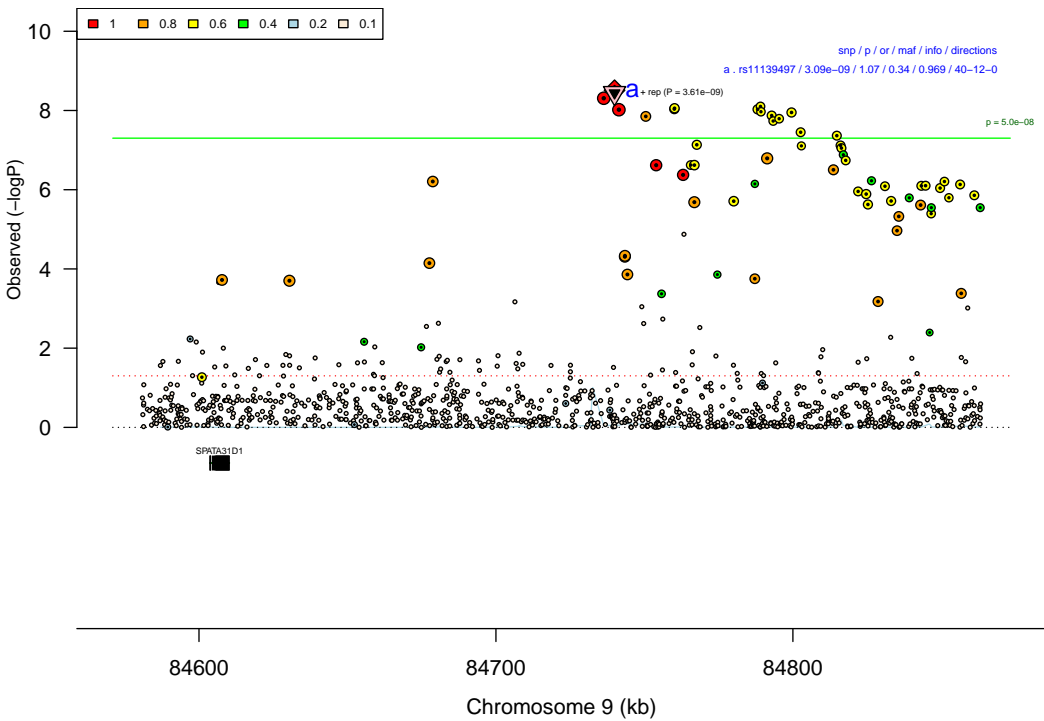

chr9:84630941–84813641; wave3; 50kb flank

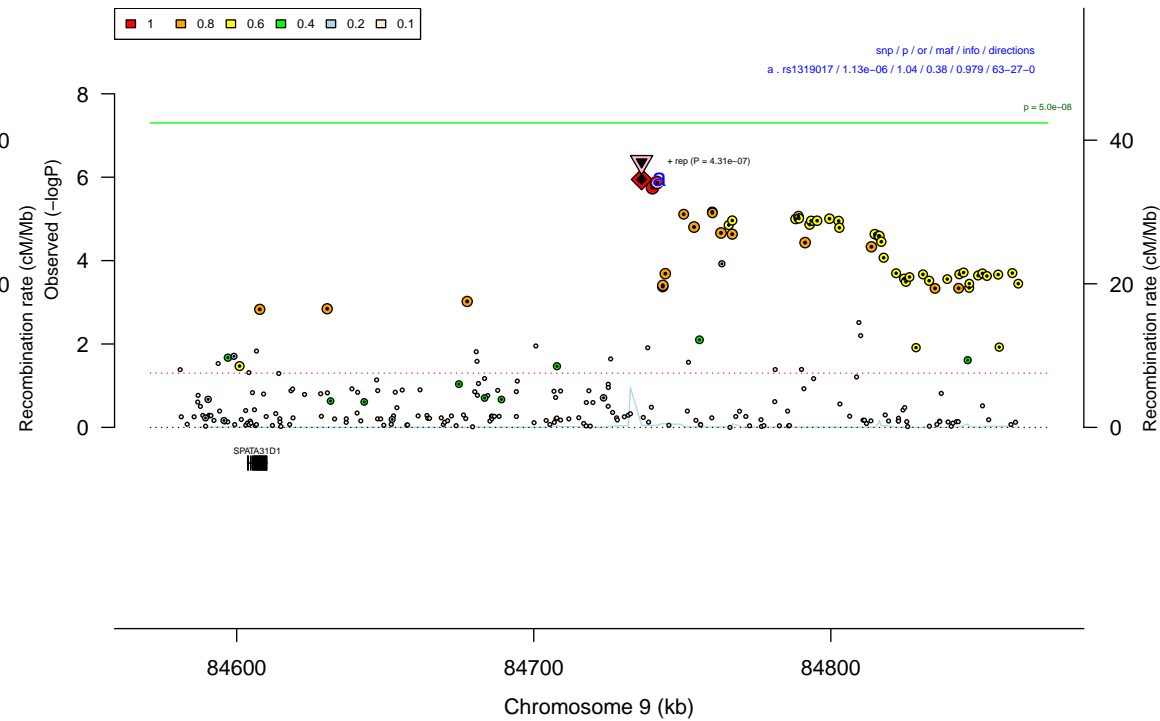

chr9:84630941–84813641; wave2; 2mb flank

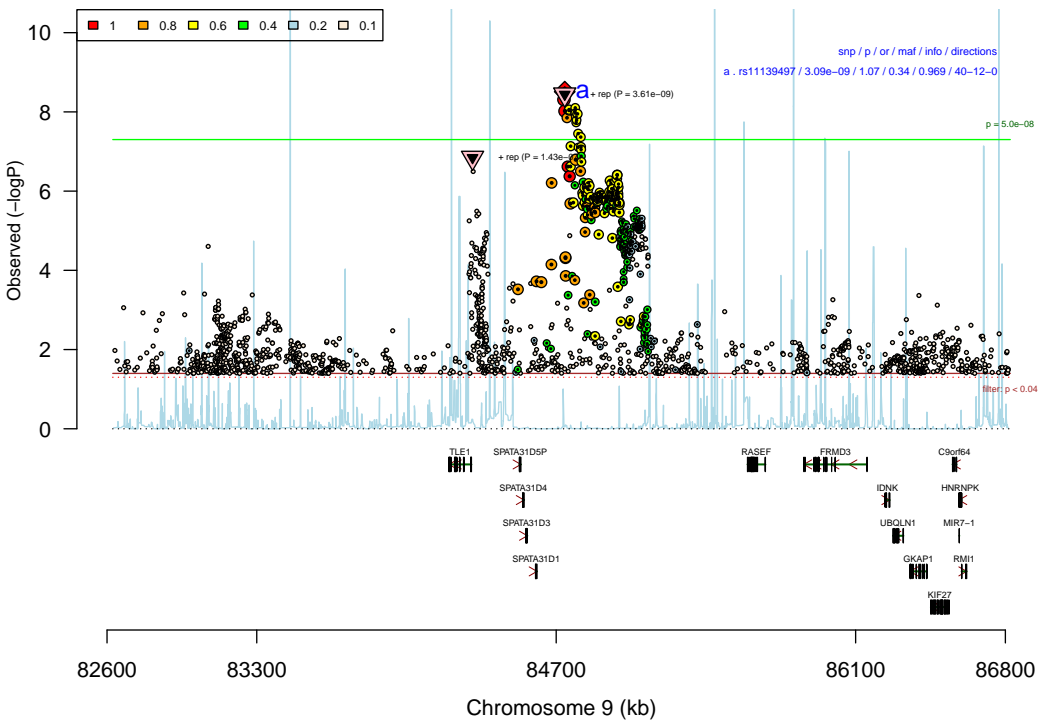

chr9:84630941–84813641; wave3; 2mb flank

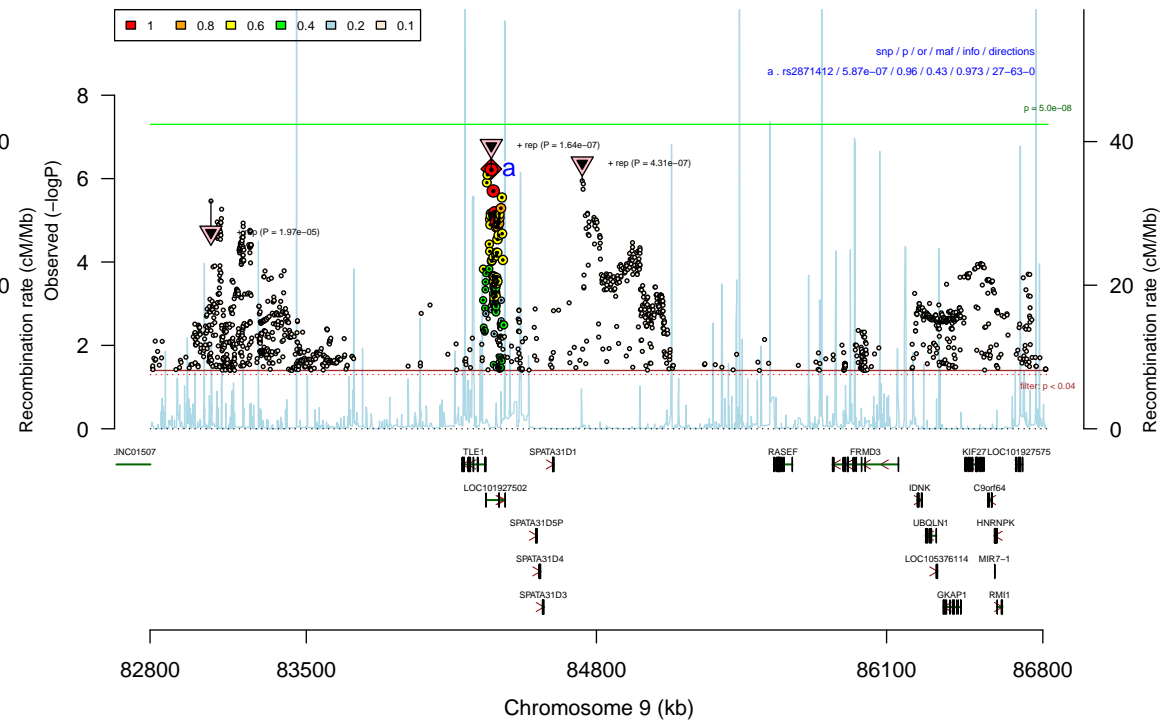

chr11:109285471–109610071; wave2; 50kb flank

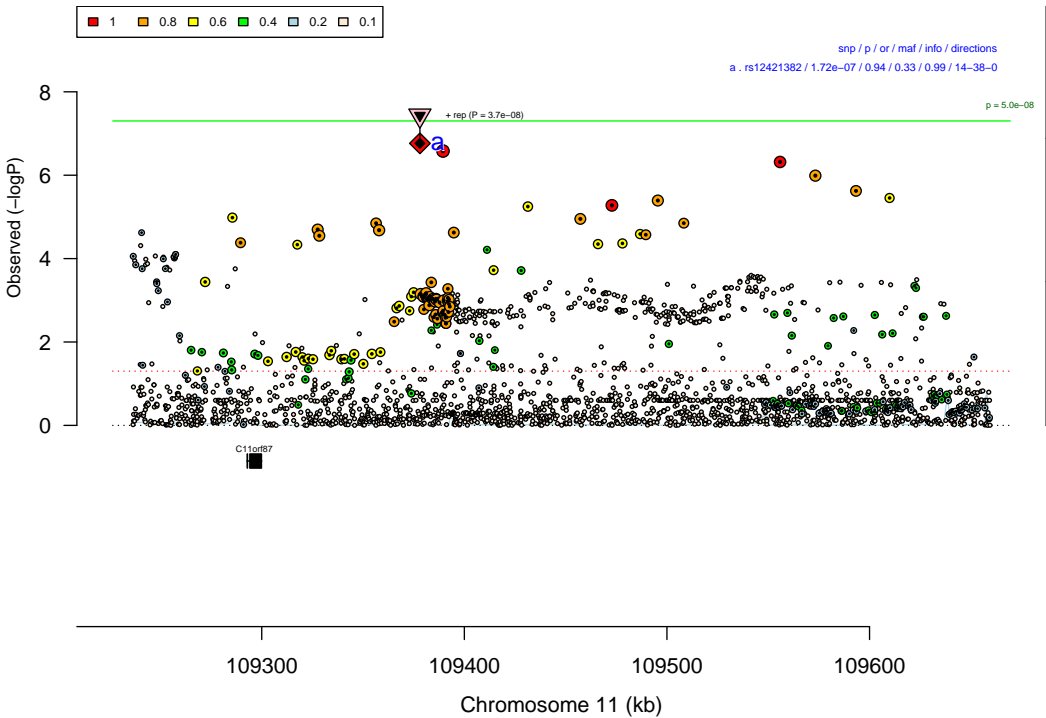

chr11:109285471–109610071; wave3; 50kb flank

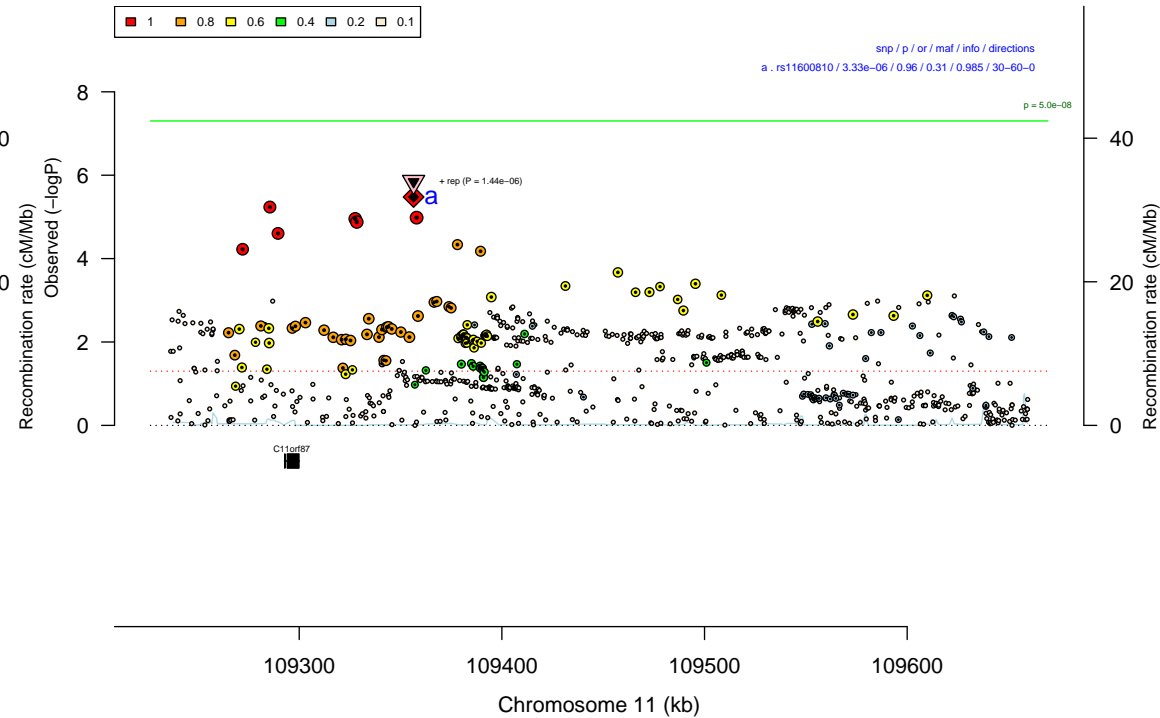

chr11:109285471–109610071; wave2; 2mb flank

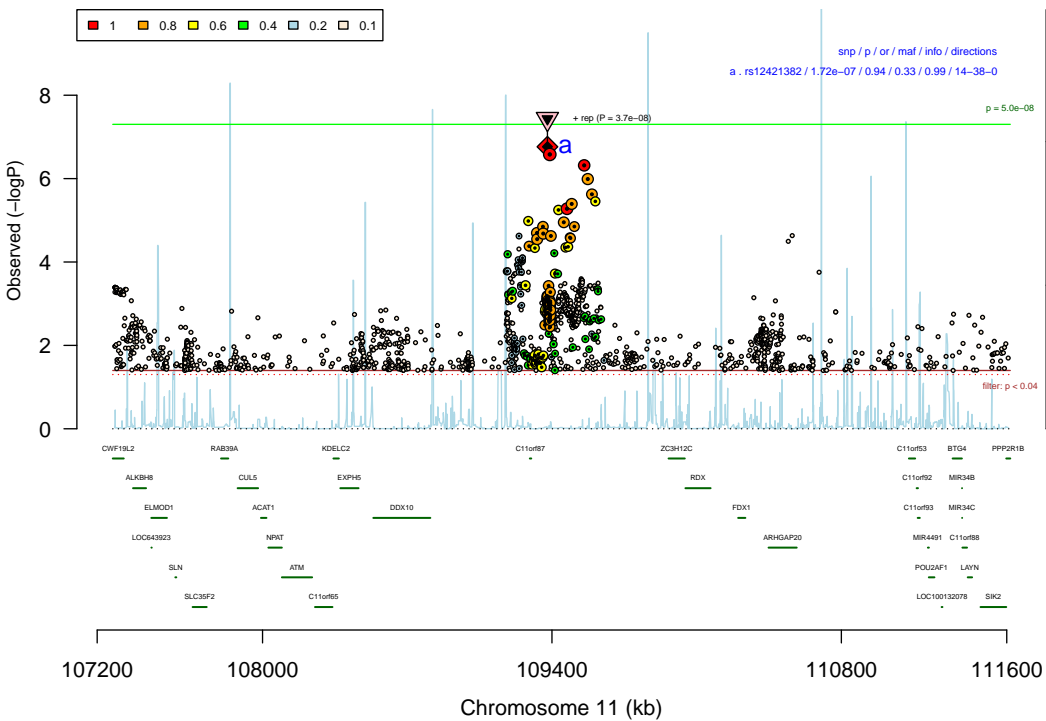

chr11:109285471–109610071; wave3; 2mb flank

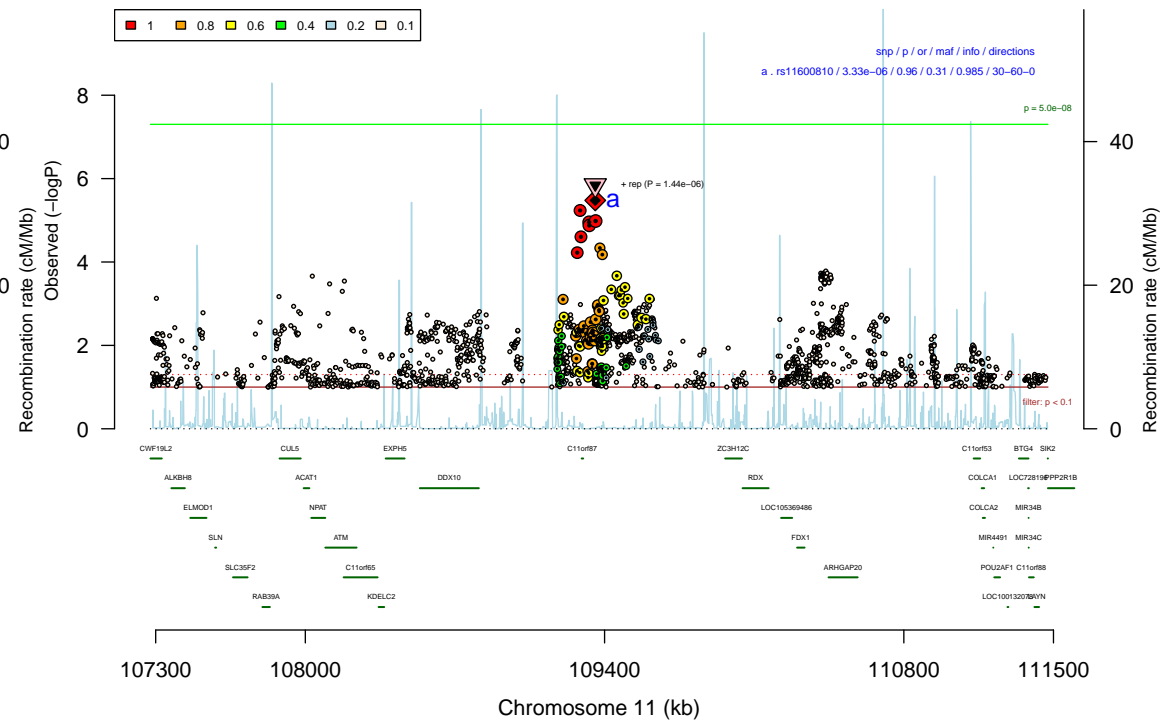



■ 1 ■ 0.8 ■ 0.6 ■ 0.4 ■ 0.2 ■ 0.1

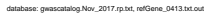

■ 1 ■ 0.8 ■ 0.6 ■ 0.4 ■ 0.2 ■ 0.1

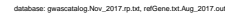

■ 1 ■ 0.8 ■ 0.6 ■ 0.4 ■ 0.2 ■ 0.1

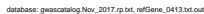

1 0.8 0.6 0.4 0.2 0.1

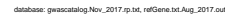



chr16:67709340–68311340; wave2; 50kb flank

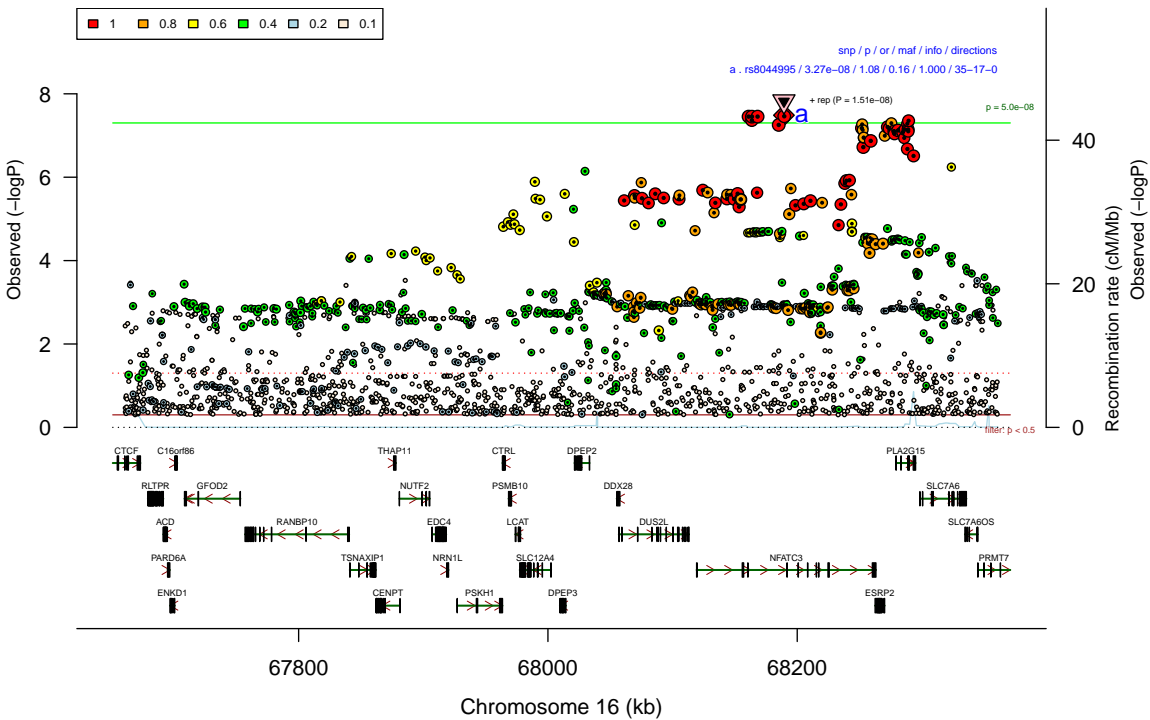

chr16:67709340–68311340; wave3; 50kb flank

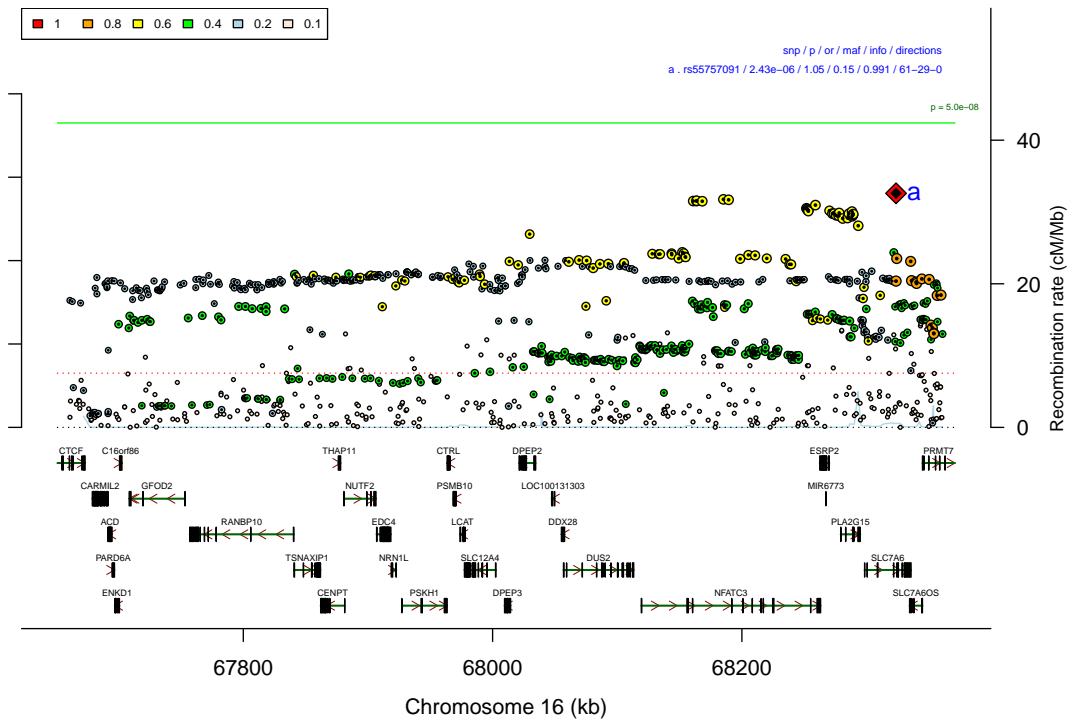

chr16:67709340–68311340; wave2; 2mb flank

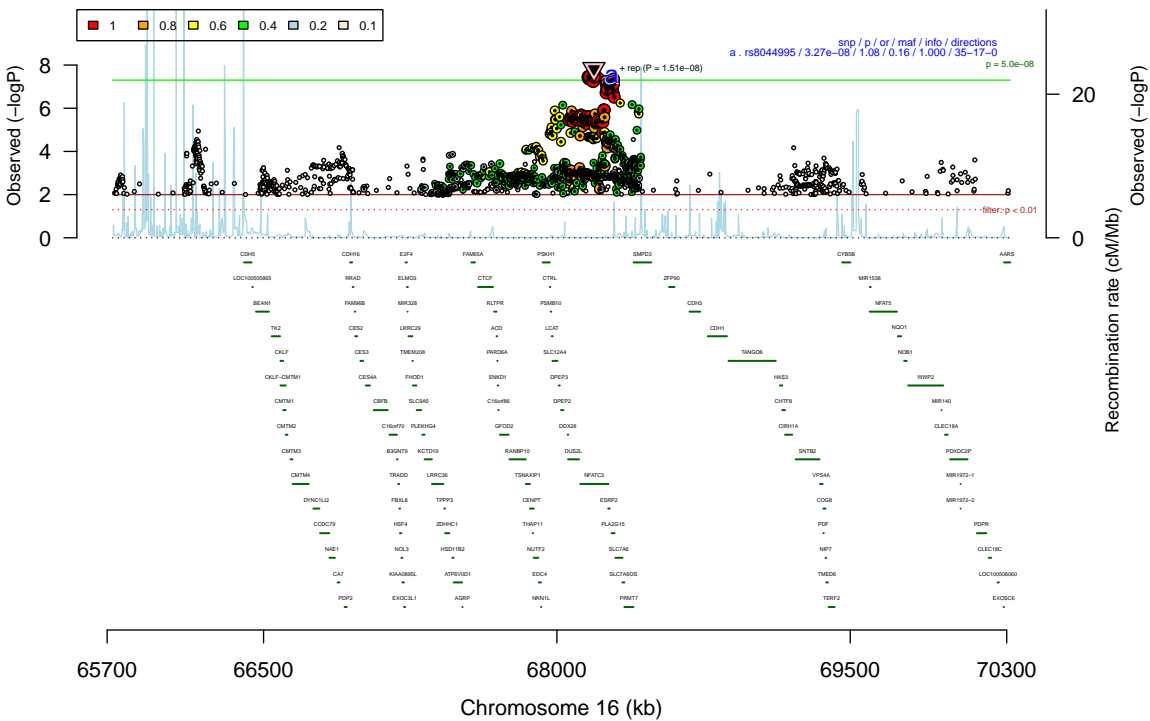

chr16:67709340–68311340; wave3; 2mb flank

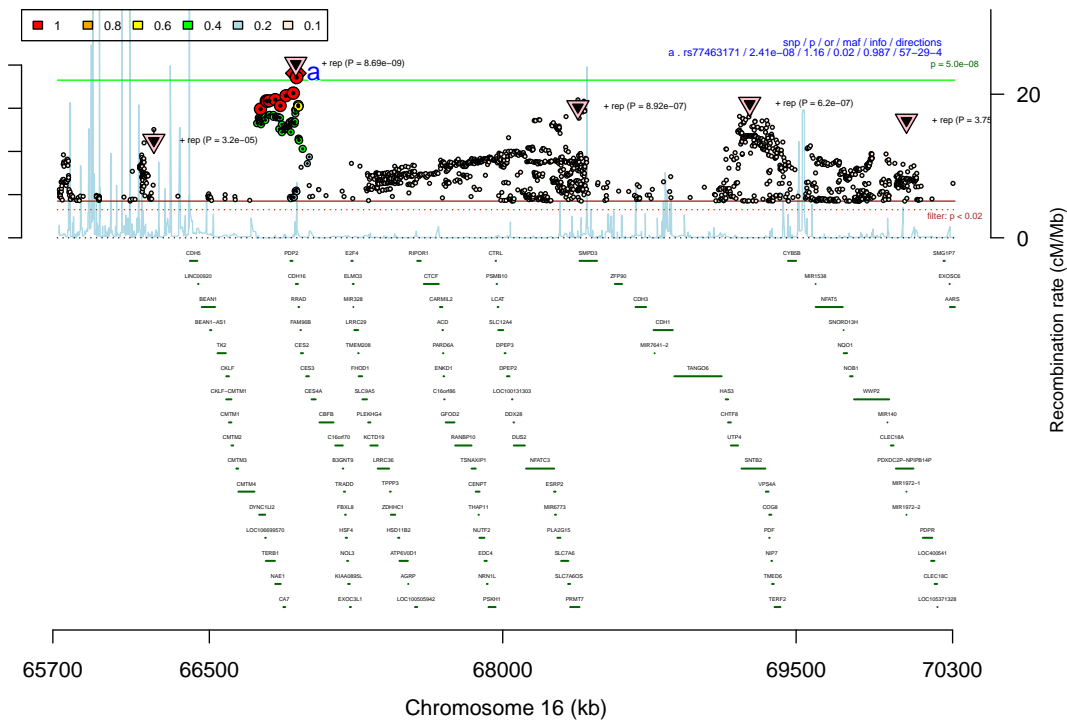

**chr17:17722402–18030202; wave2; 50kb flank**

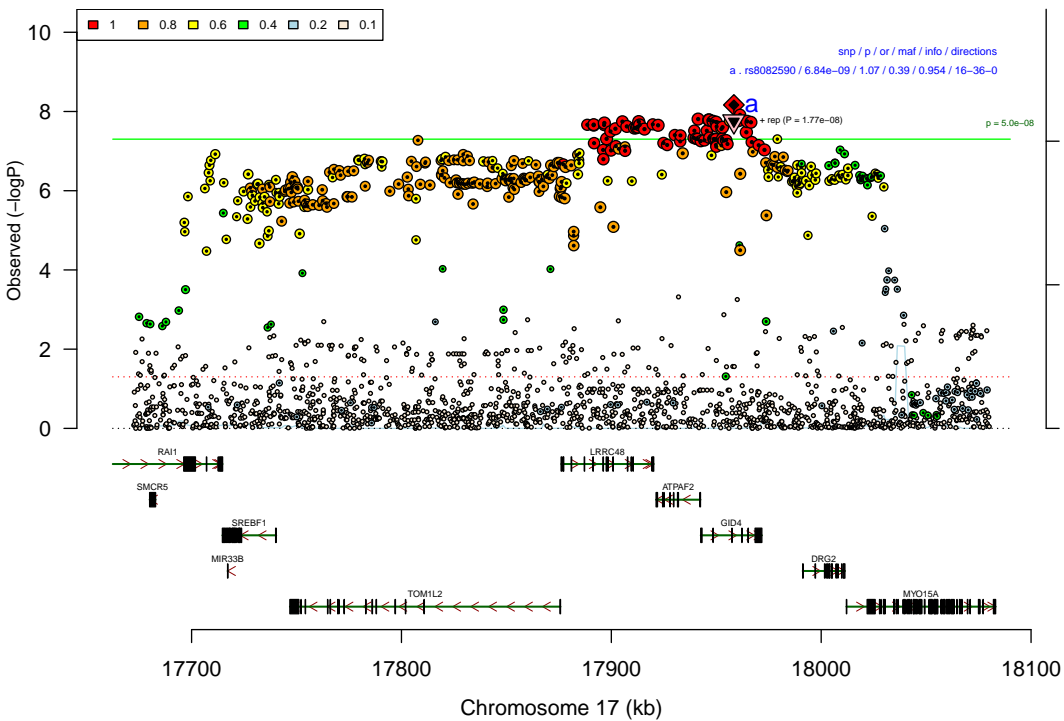

**chr17:17722402–18030202; wave3; 50kb flank**

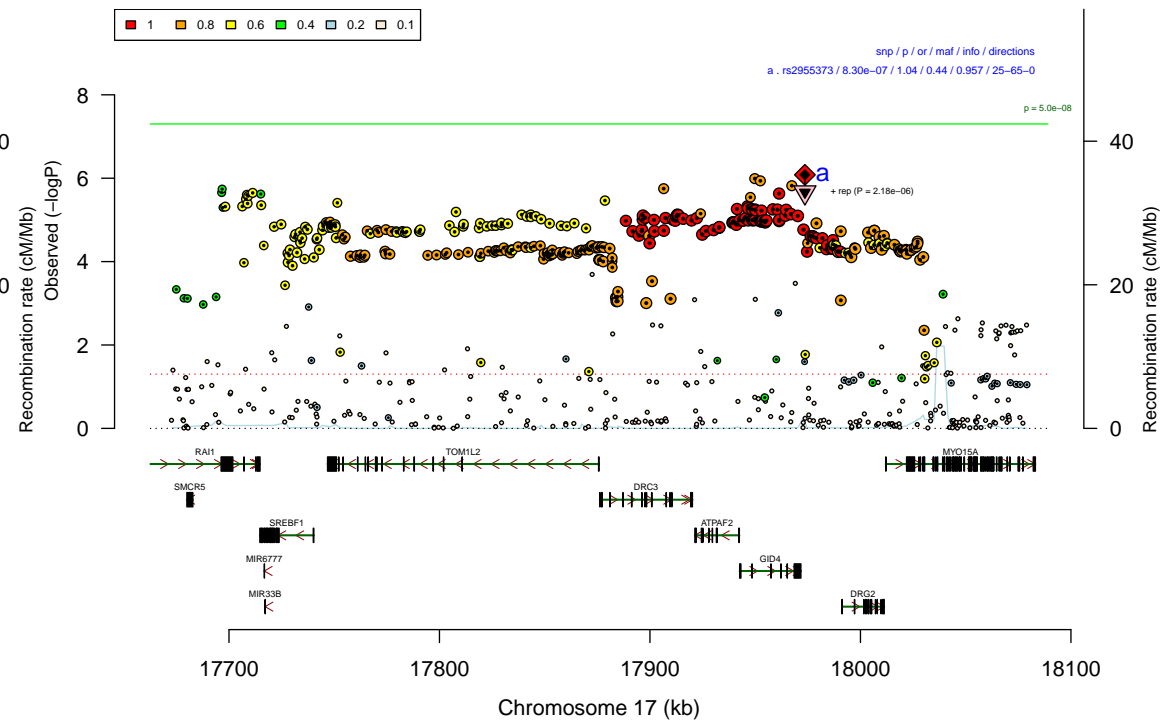

**chr17:17722402–18030202; wave2; 2mb flank**

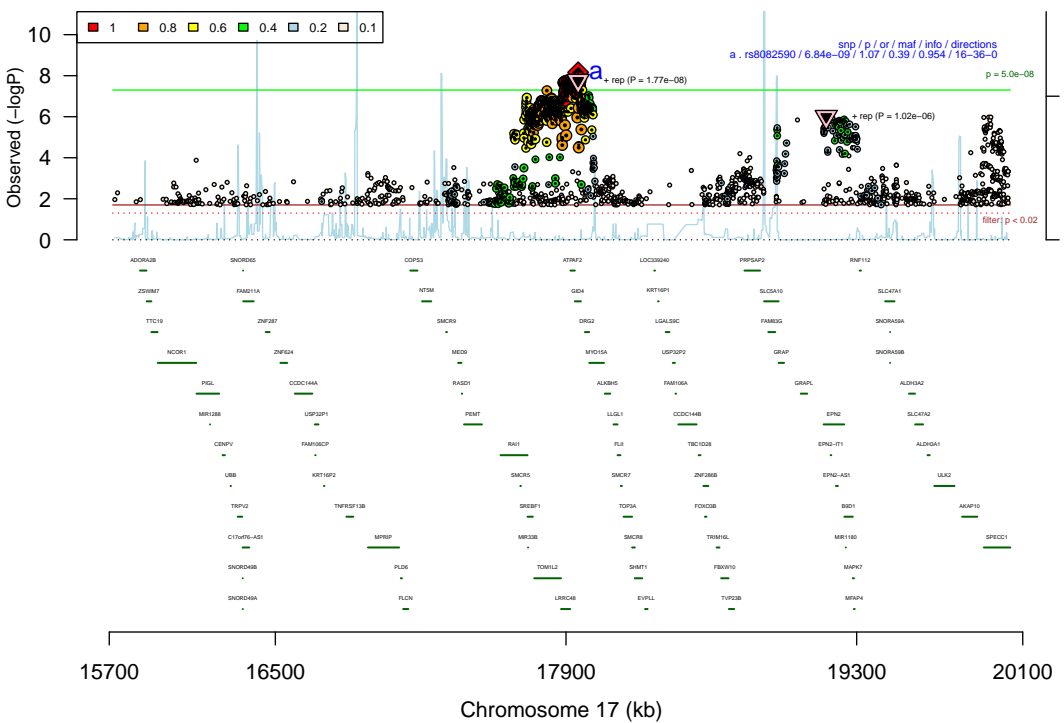

**chr17:17722402–18030202; wave3; 2mb flank**

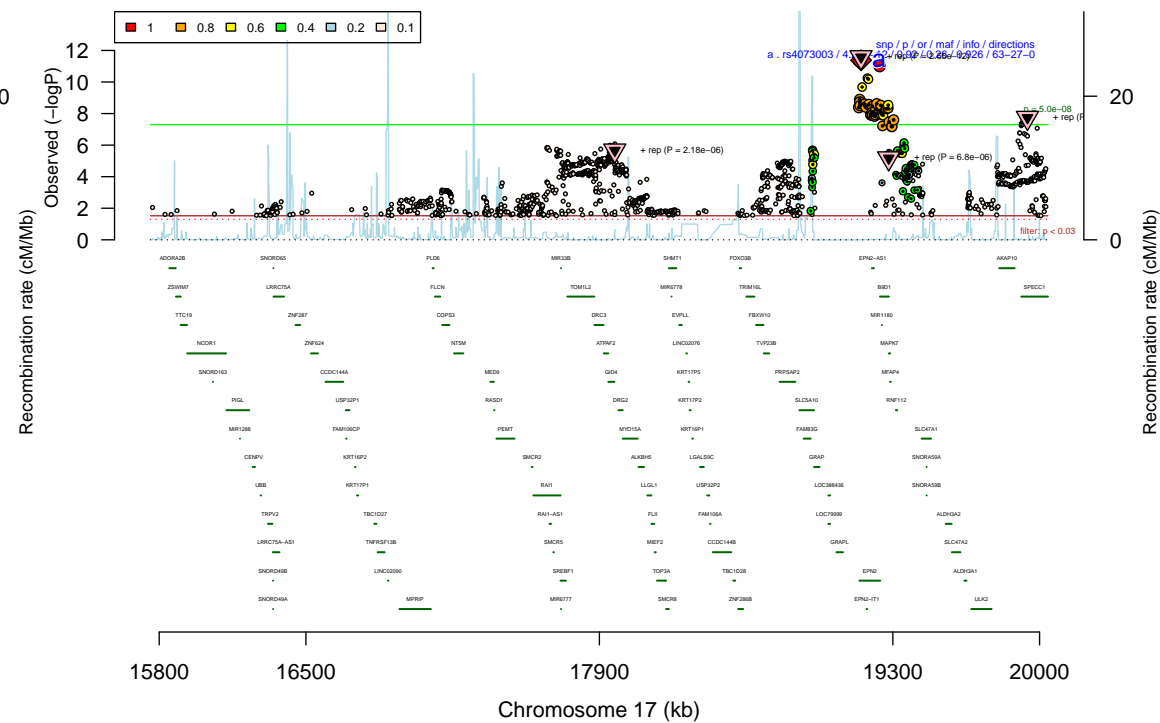

Supplement: Supplementary file [file 2020.09.12.20192922-5.zip]
