# Supplementary material
Source: bioRxiv or medRxiv preprint supplement (http://medrxiv.stage.highwire.org/highwire/filestream/96583/field_highwire_adjunct_files/4/2020.09.12.20192922-5.zip)

SCZ\_uncond-rs13195636-chr6

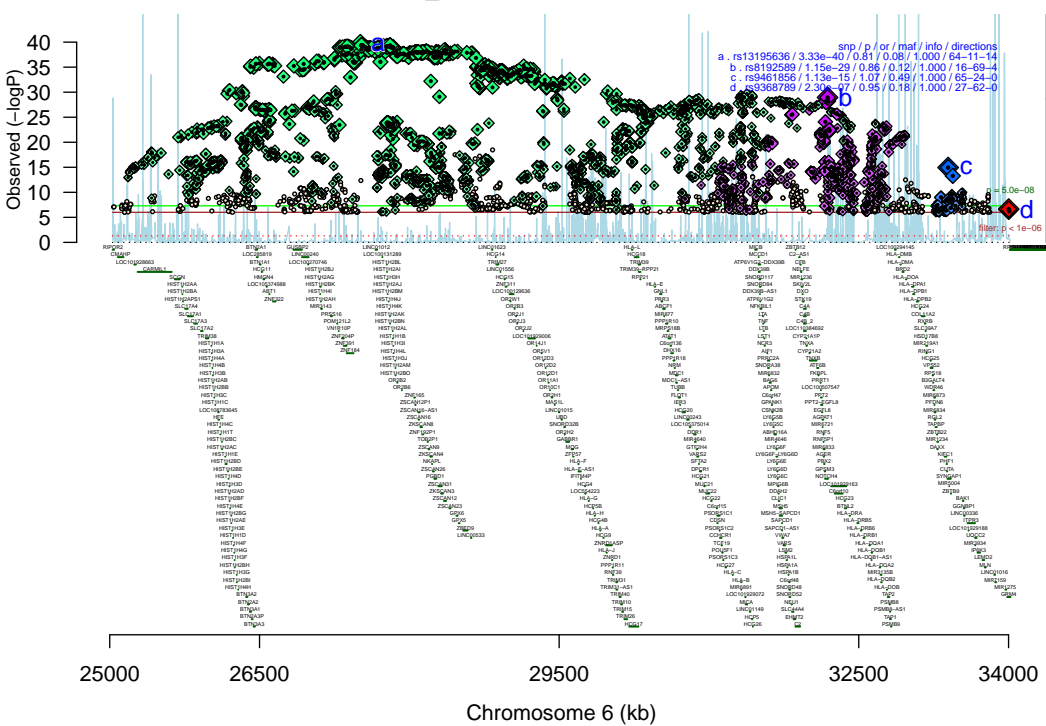

SCZ\_cond-rs13195636-chr6

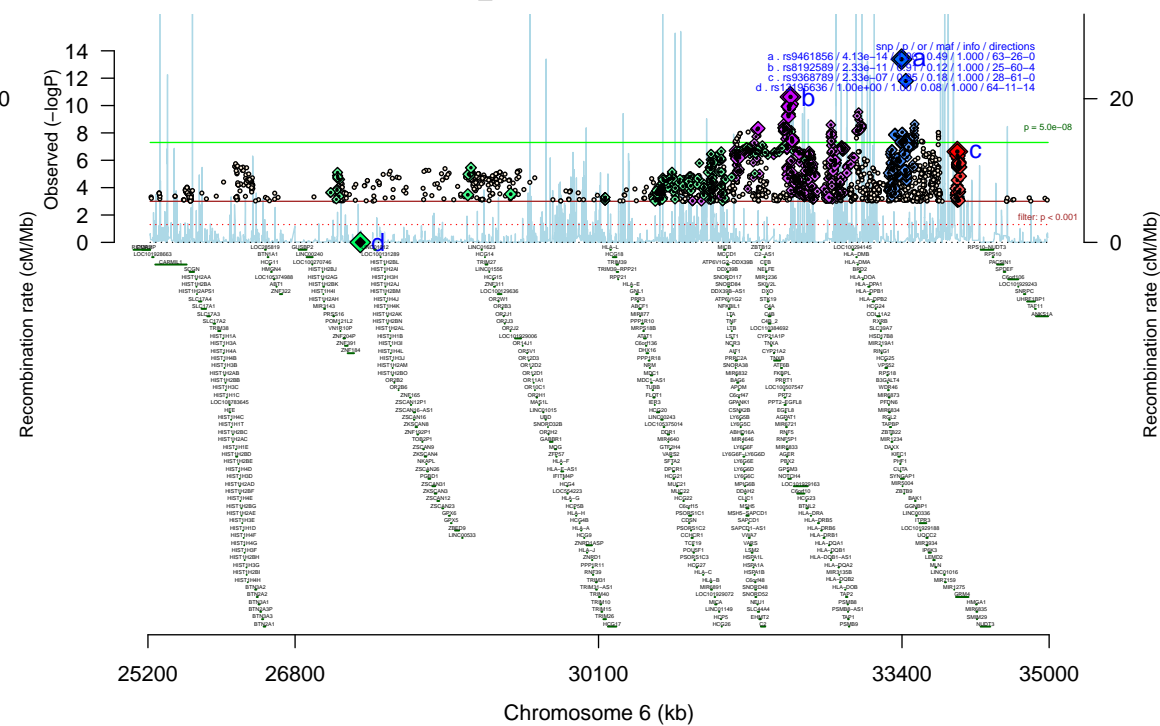

SCZ\_cond-rs13195636-rs9461856-chr6

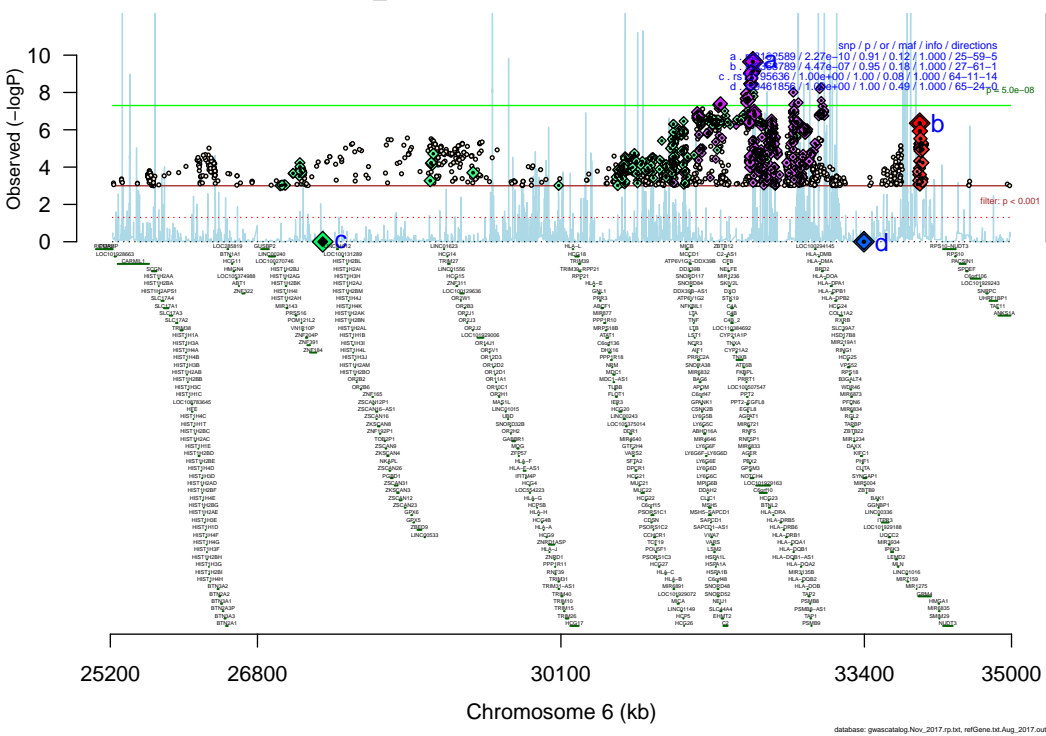

SCZ\_cond-rs13195636-rs9461856-rs8192589-chr6

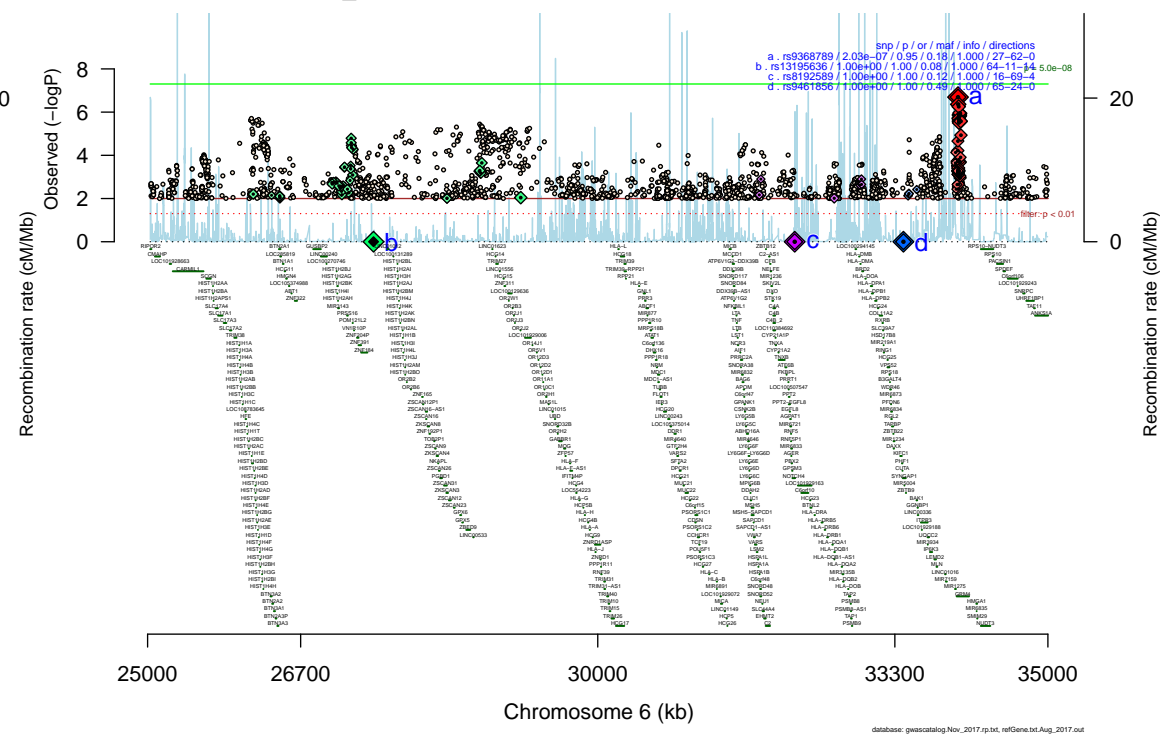

```

a . rs13195636 / 1.00e+00 / 1.00 / 0.08 / 1.000 / 64-11-14
b . rs8192589 / 1.00e+00 / 1.00 / 0.12 / 1.000 / 16-69-4
c . rs9368789 / 1.00e+00 / 1.00 / 0.18 / 1.000 / 27-62-0
d . rs9461856 / 1.00e+00 / 1.00 / 0.49 / 1.000 / 65-24-0

```

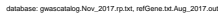

SCZ\_uncond-rs58120505-chr7

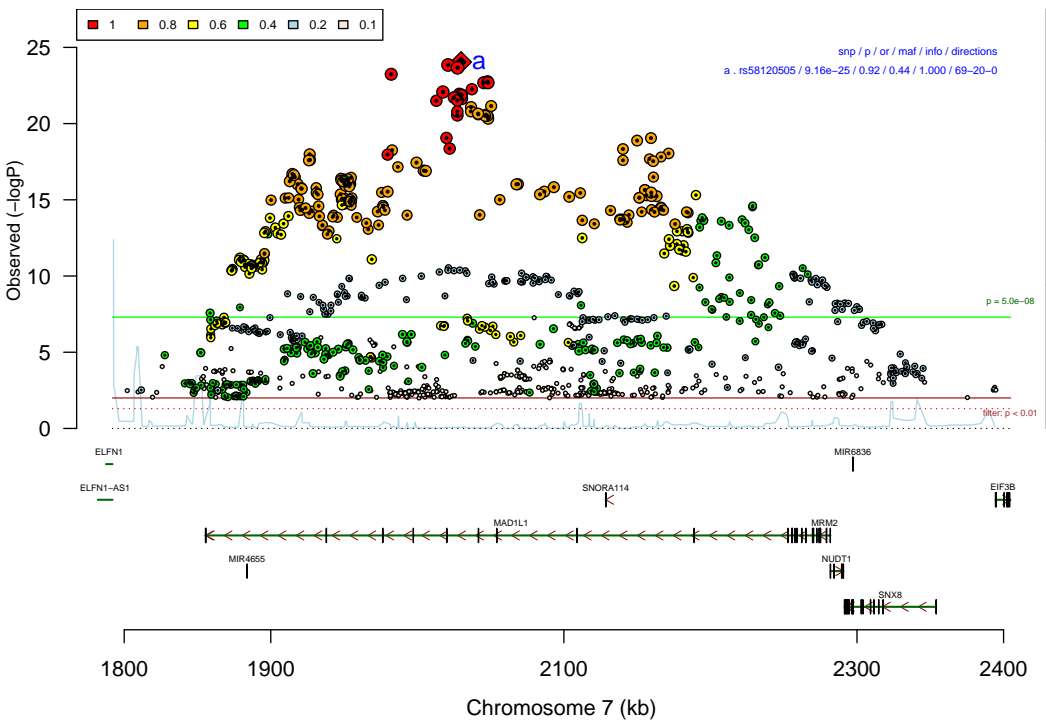

SCZ\_cond-rs58120505-chr7

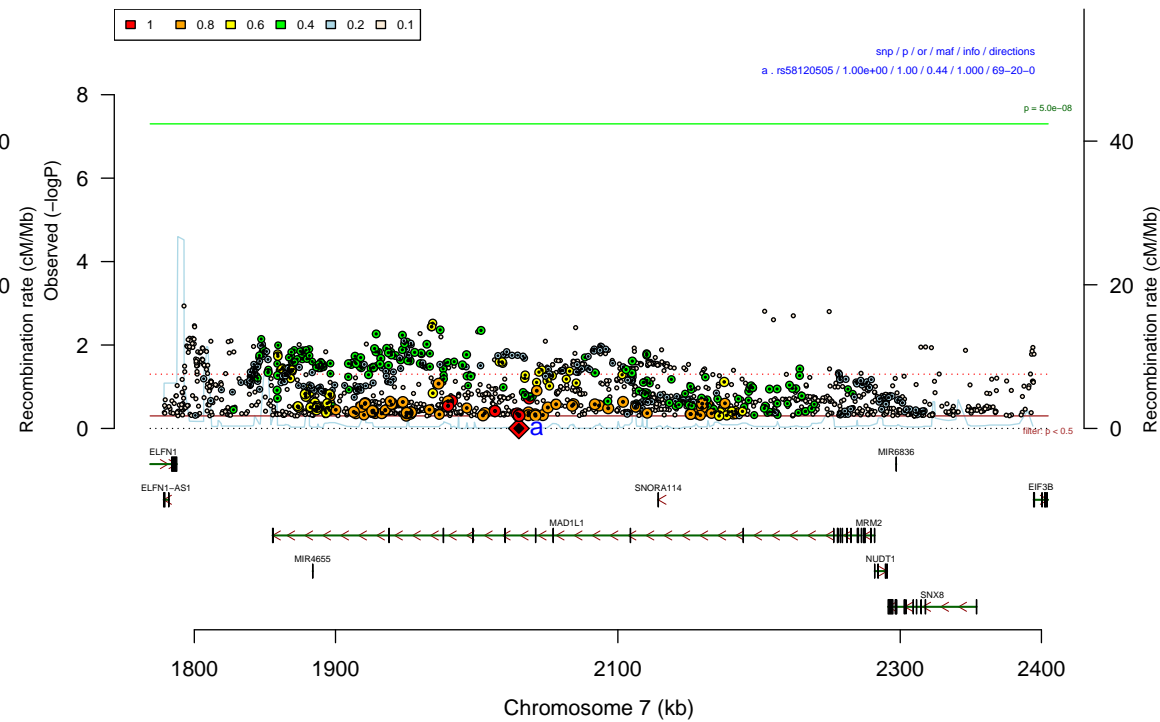

SCZ\_uncond-rs4702-chr15

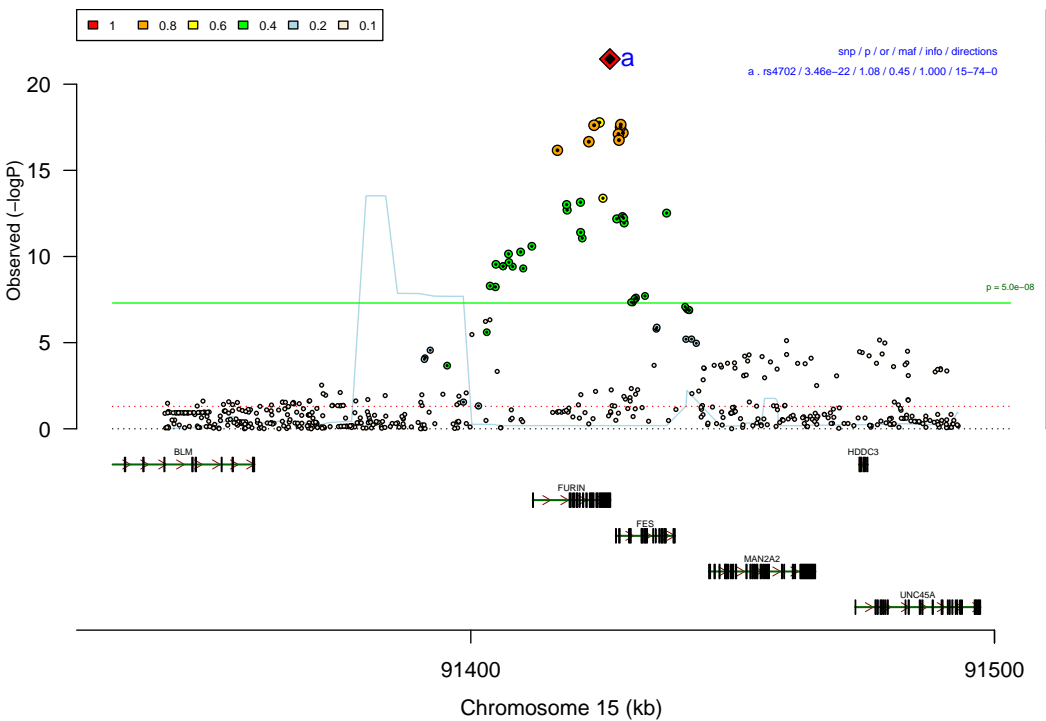

SCZ\_cond-rs4702-chr15

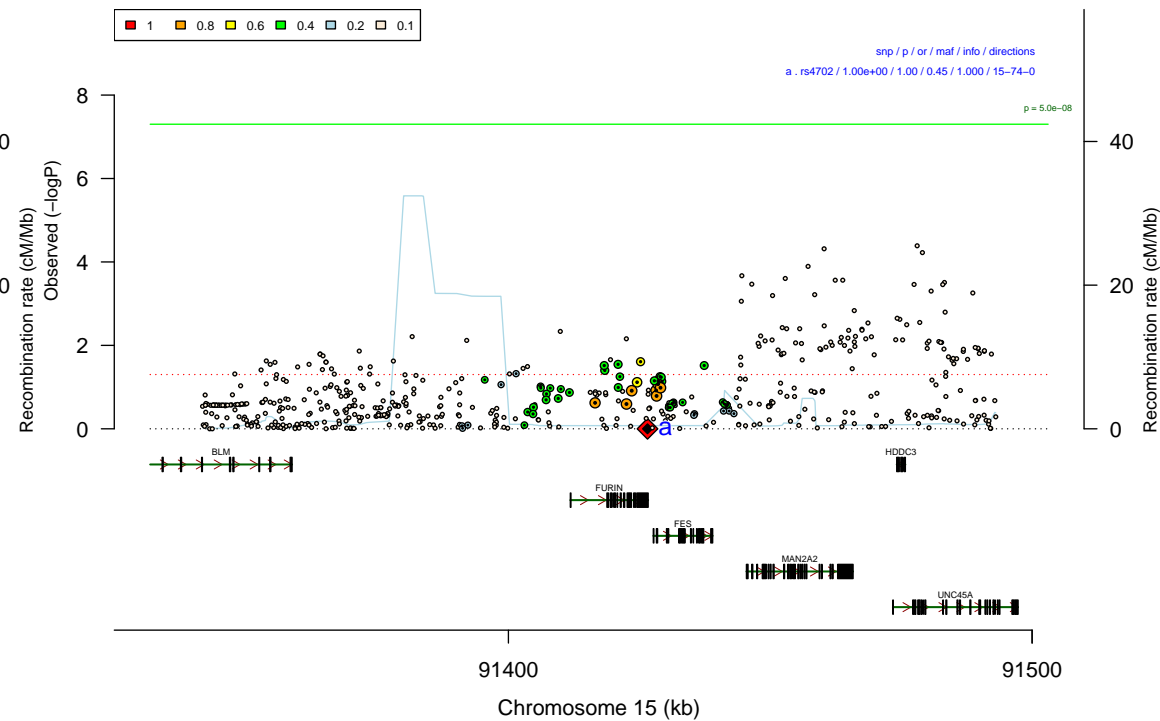





SCZ\_uncond-rs10774034-chr12

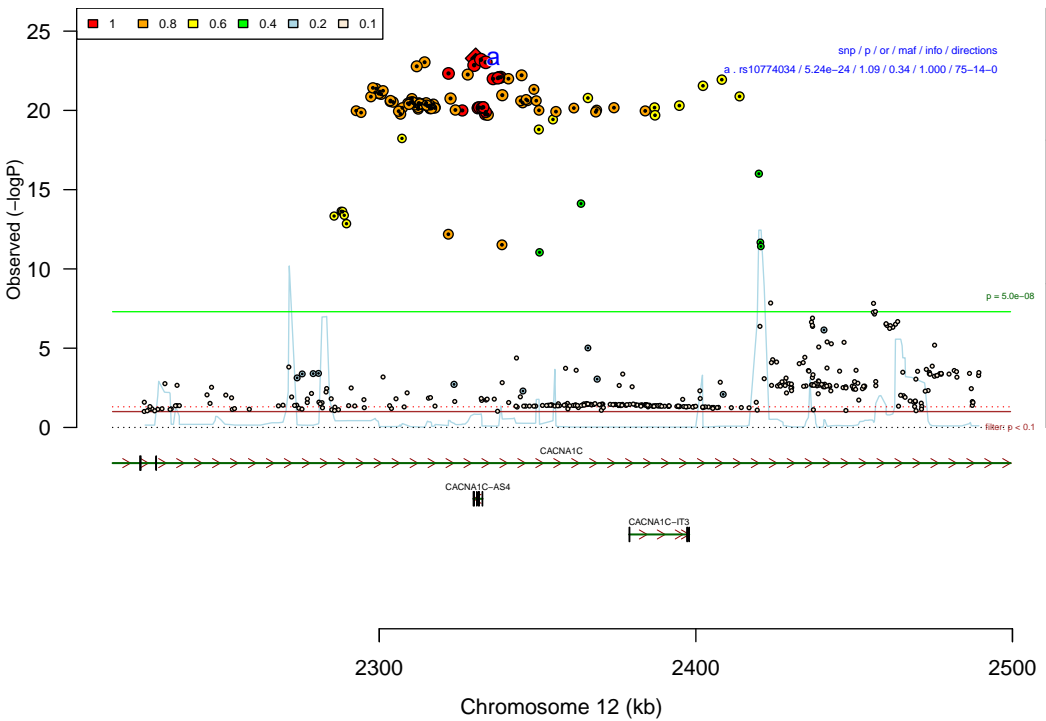

SCZ\_cond-rs10774034-chr12

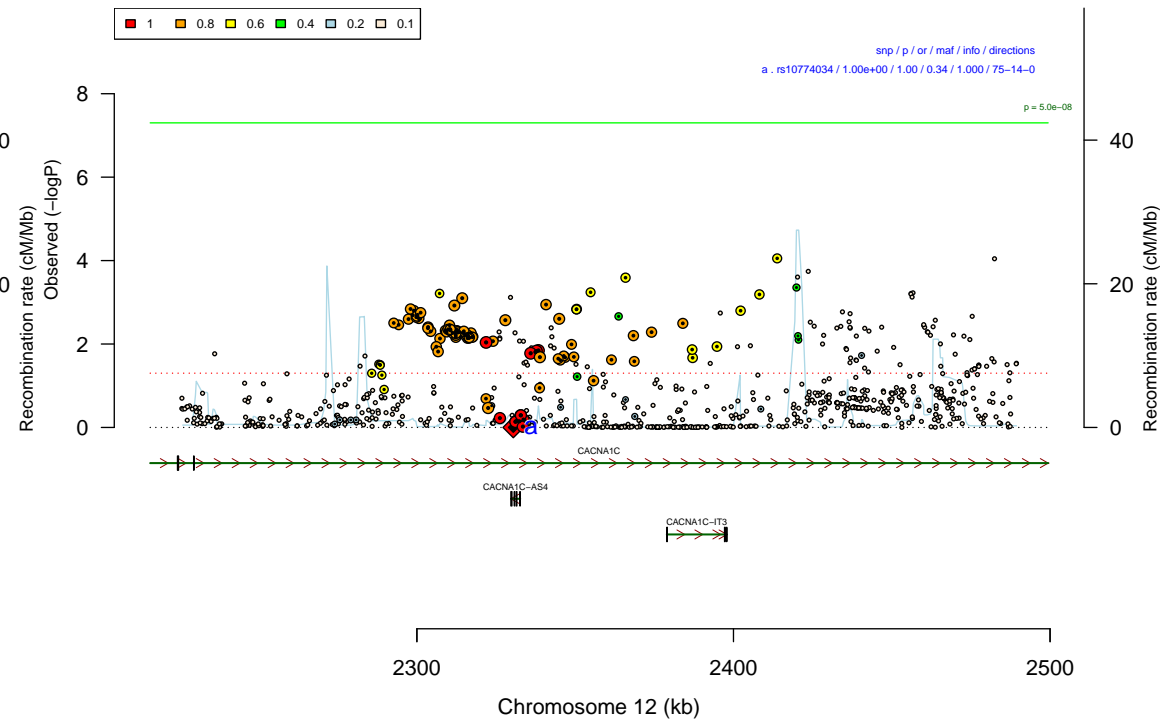

SCZ\_uncond-rs2102949-chr12

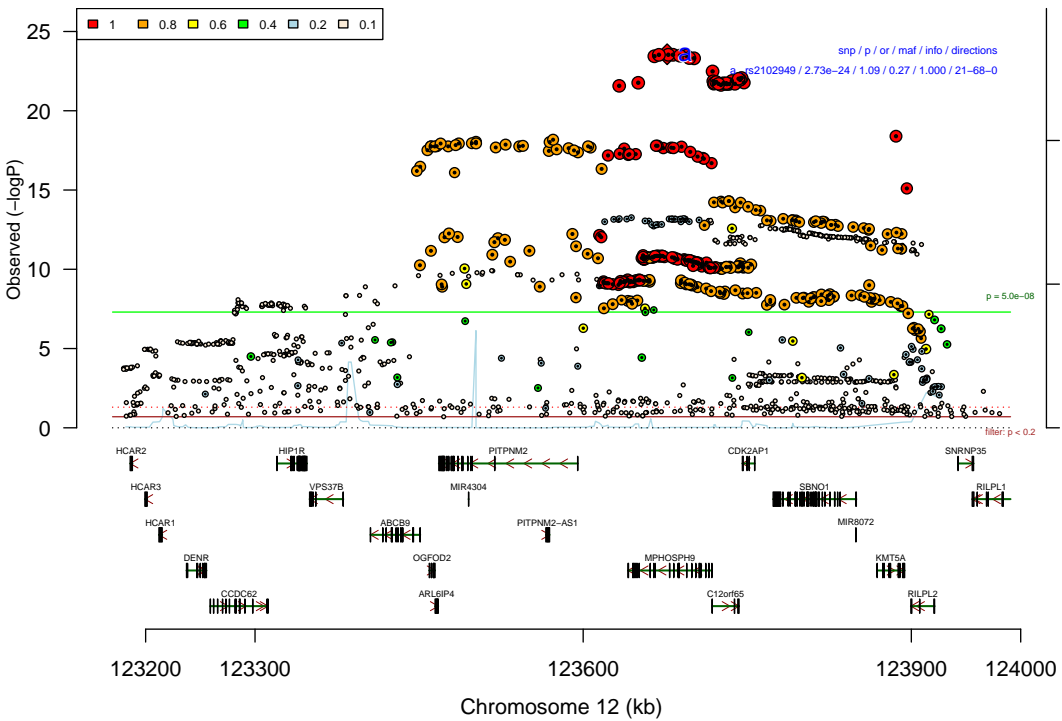

SCZ\_cond-rs2102949-chr12

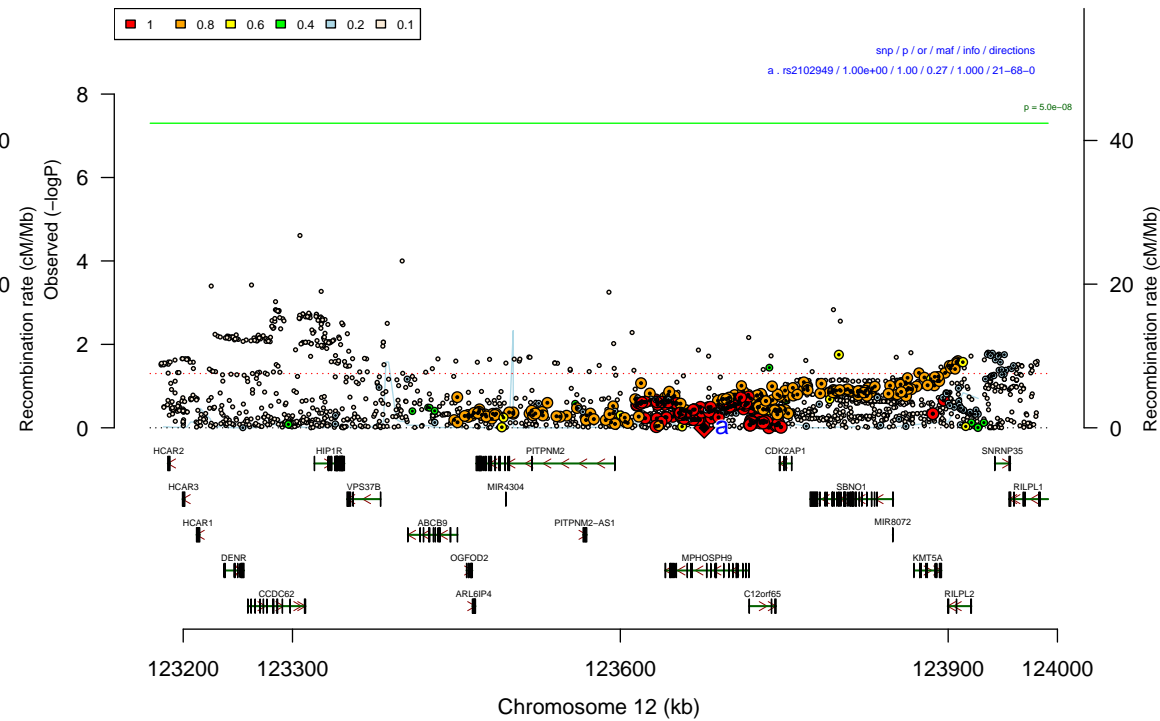

SCZ\_uncond-rs13107325-chr4

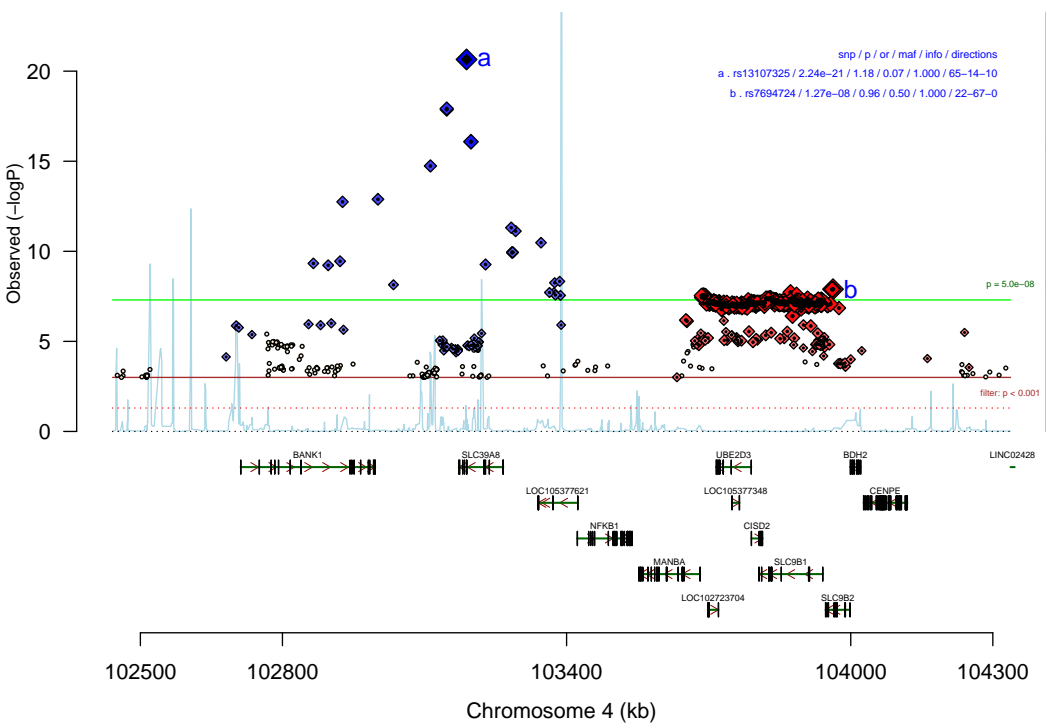

SCZ\_cond\_rs13107325-chr4

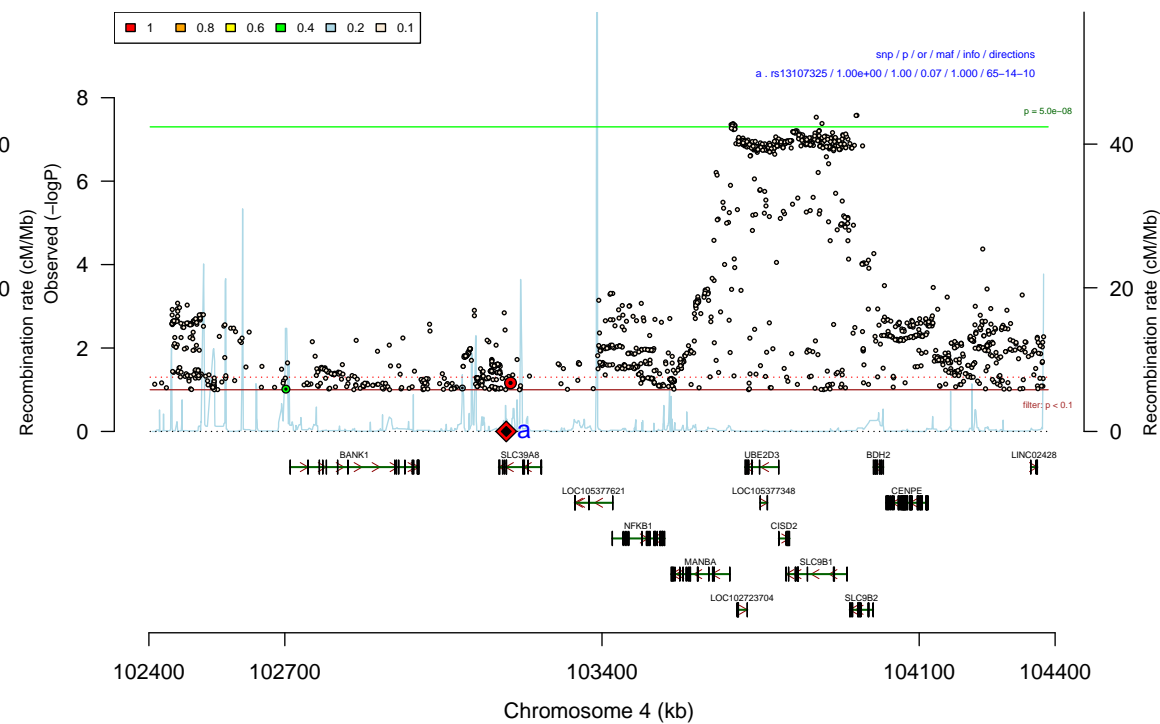

SCZ\_rs13107325-rs7694724-chr4

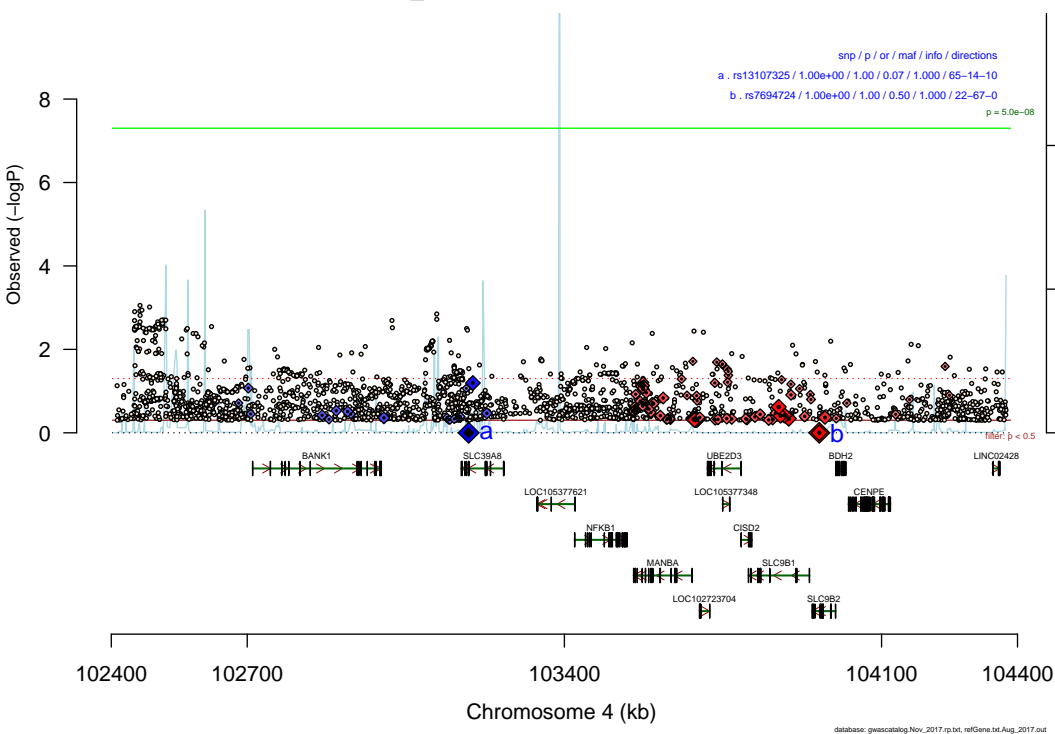

SCZ\_uncond-rs1198588-chr1

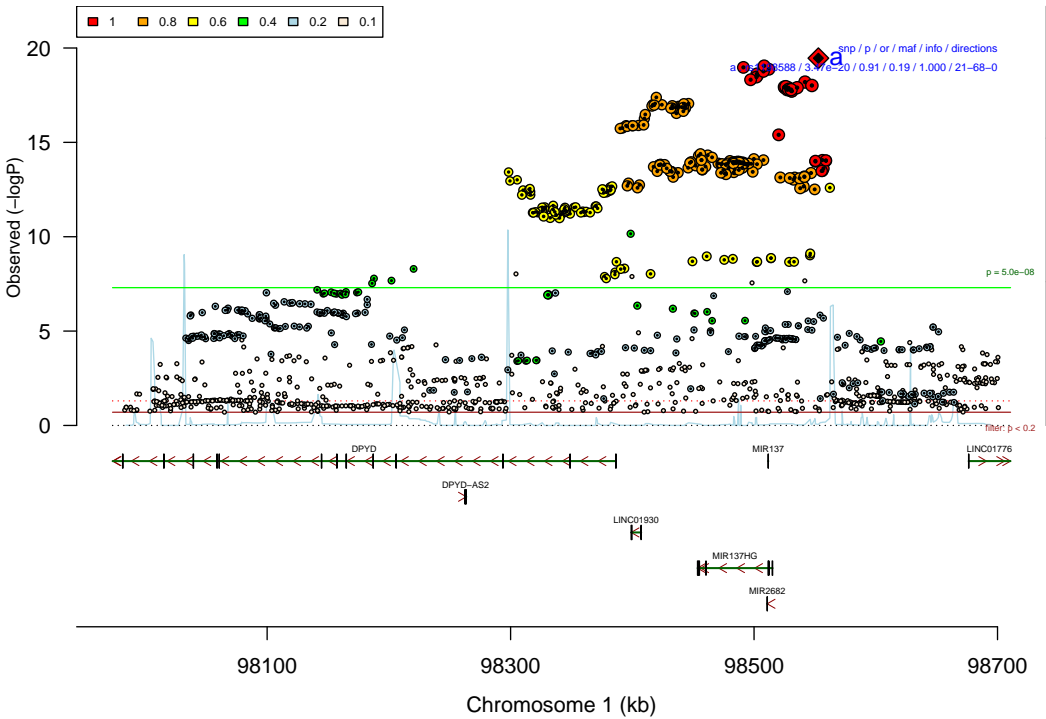

SCZ\_cond-rs1198588-chr1

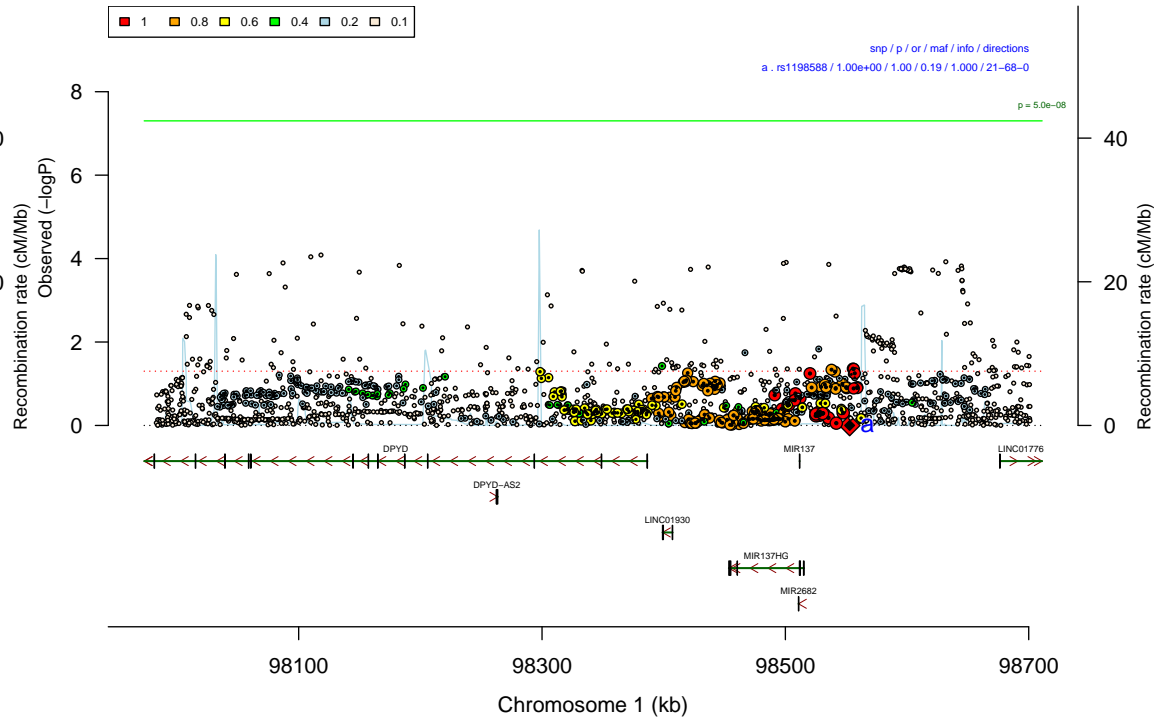

SCZ\_uncond-rs2717003-chr2

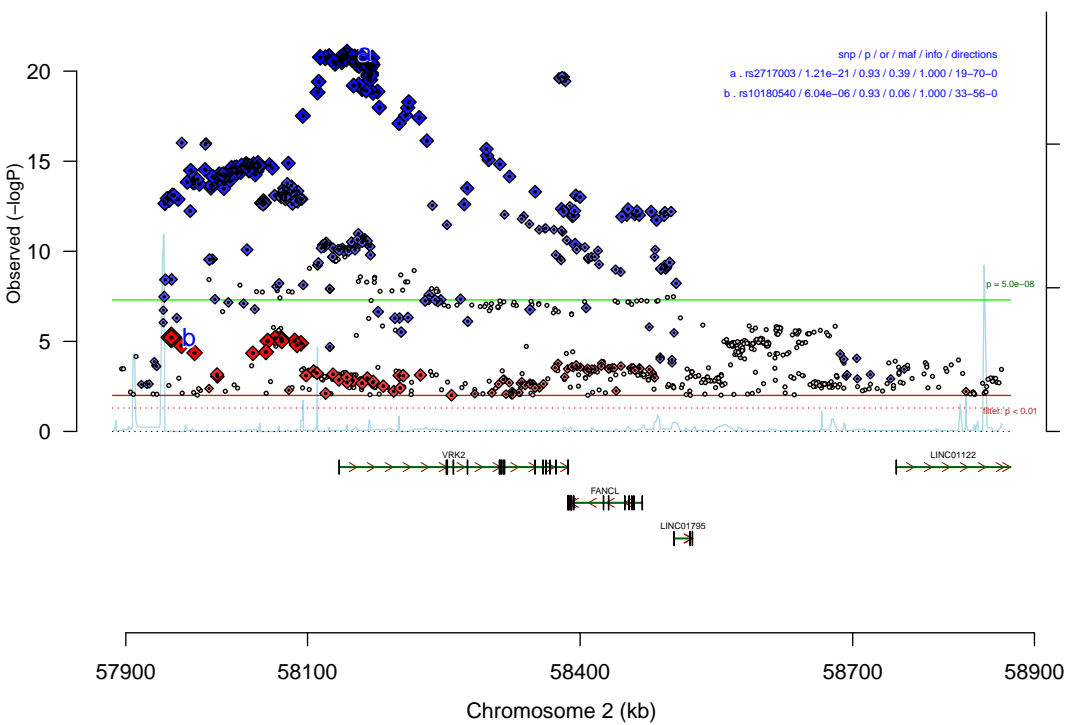

SCZ\_rs2717003-chr2

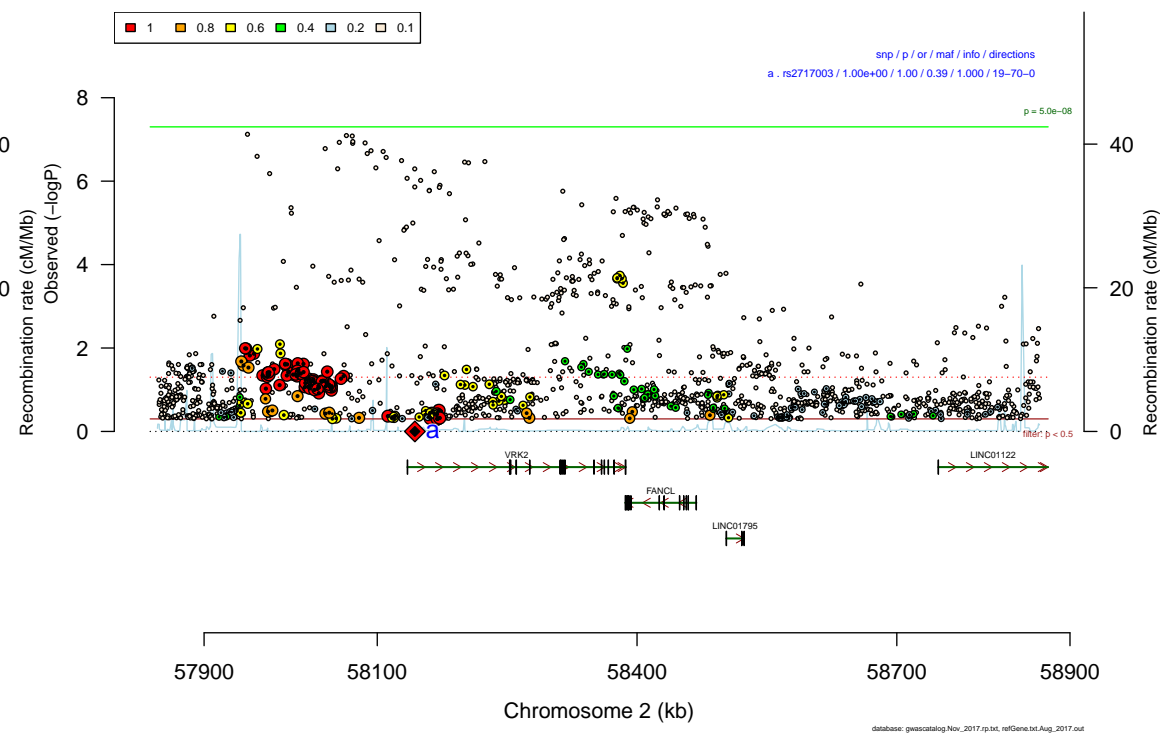

SCZ\_cond\_rs2717003-rs10180540-chr2

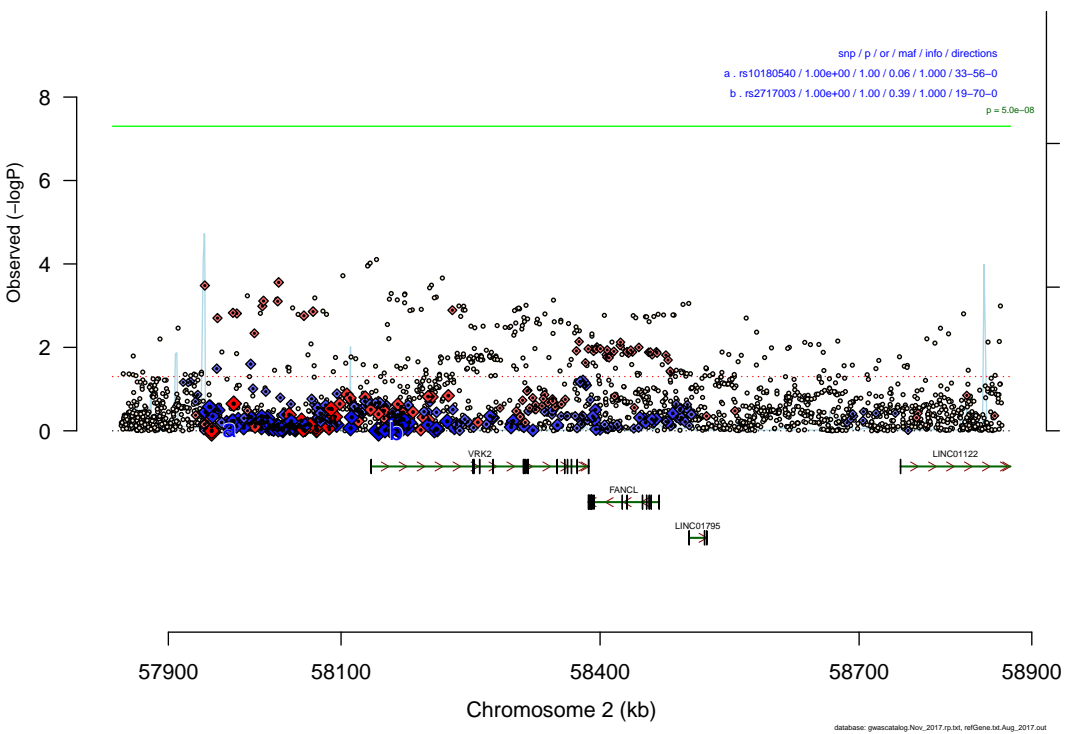

SCZ\_uncond-rs13262595-chr8

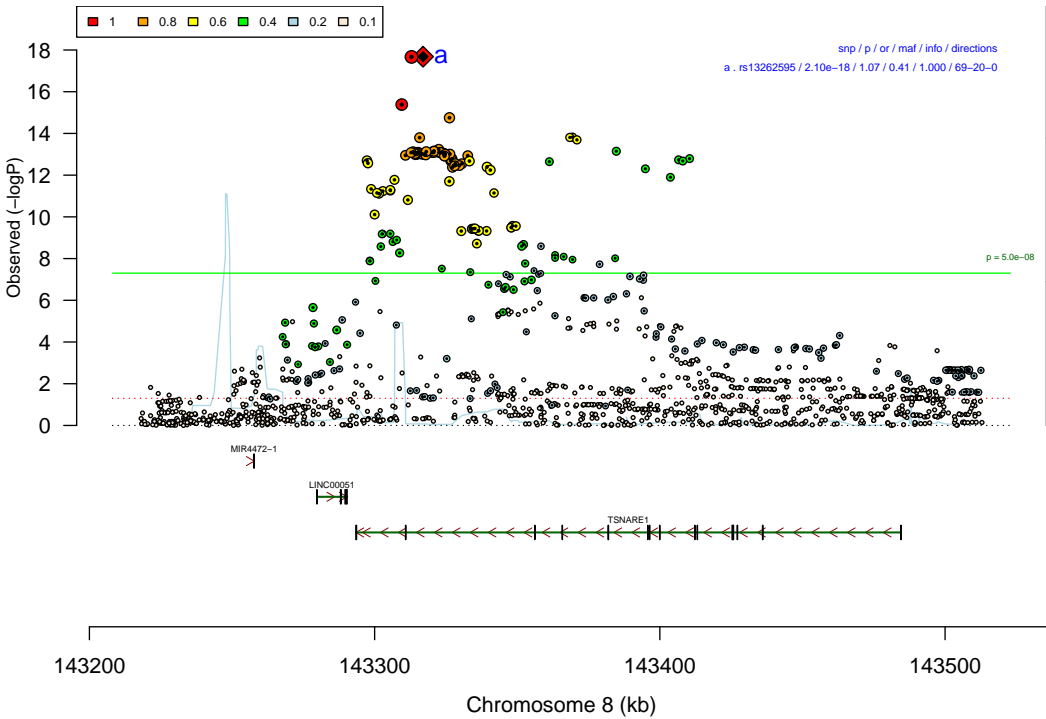

SCZ\_cond-rs13262595-chr8

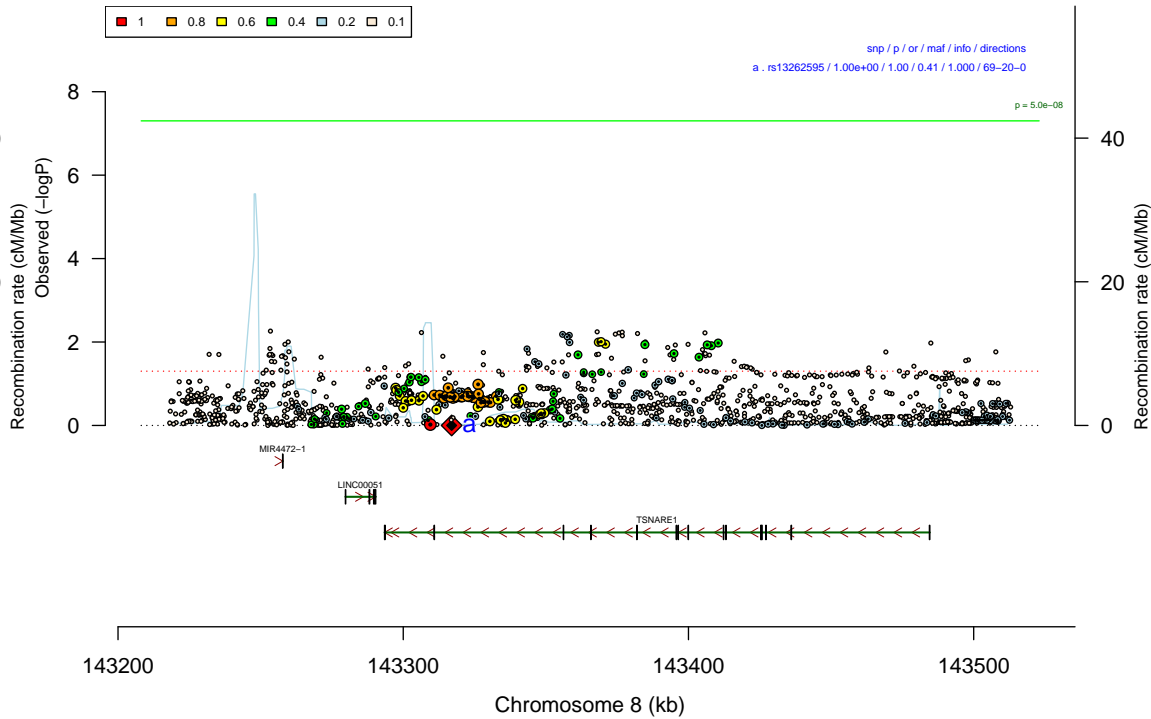

SCZ\_uncond-rs2710323-chr3

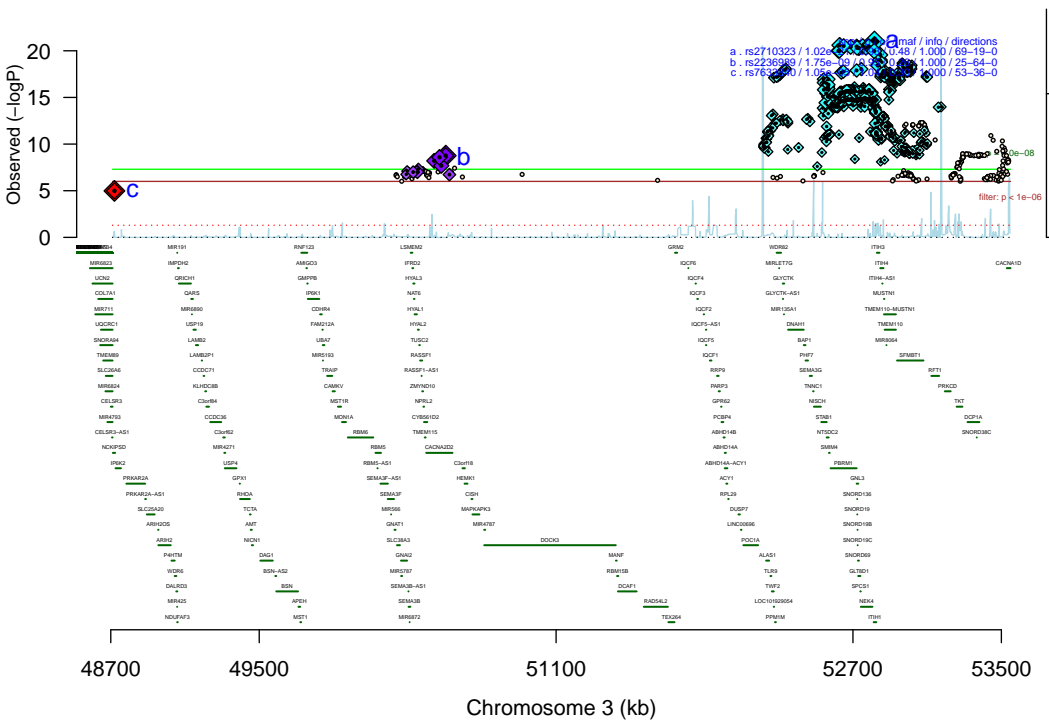

SCZ\_cond\_rs2710323-chr3

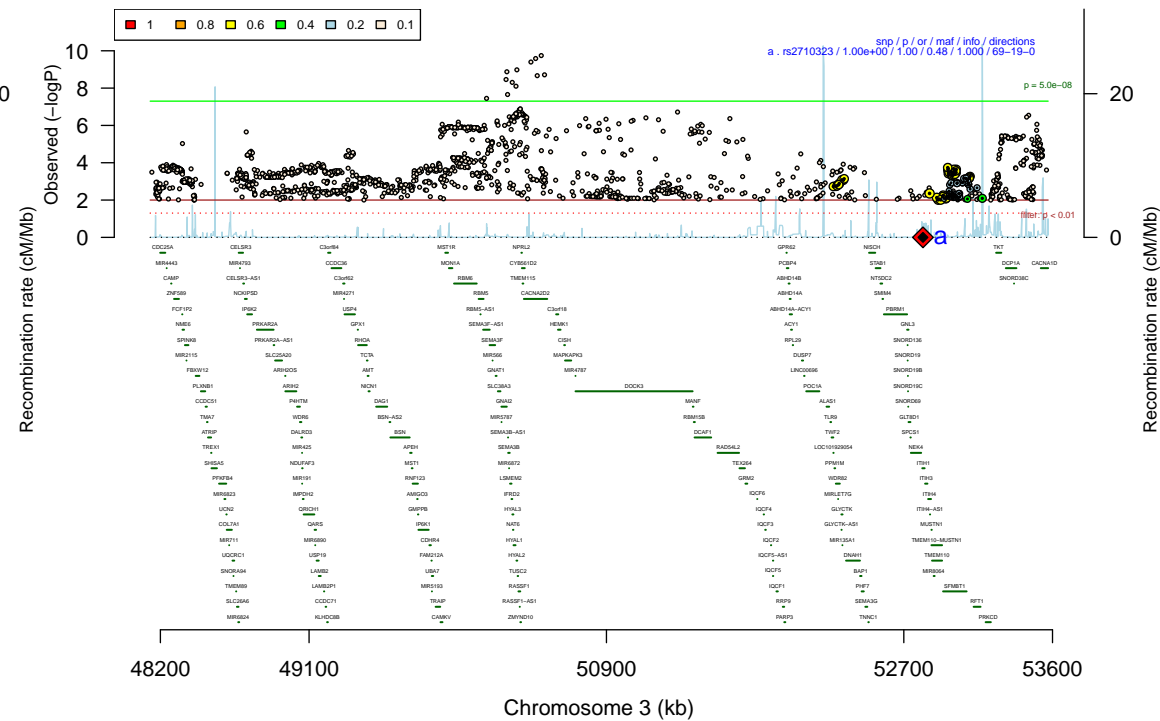

SCZ\_cond\_rs2710323-rs2236989-chr3

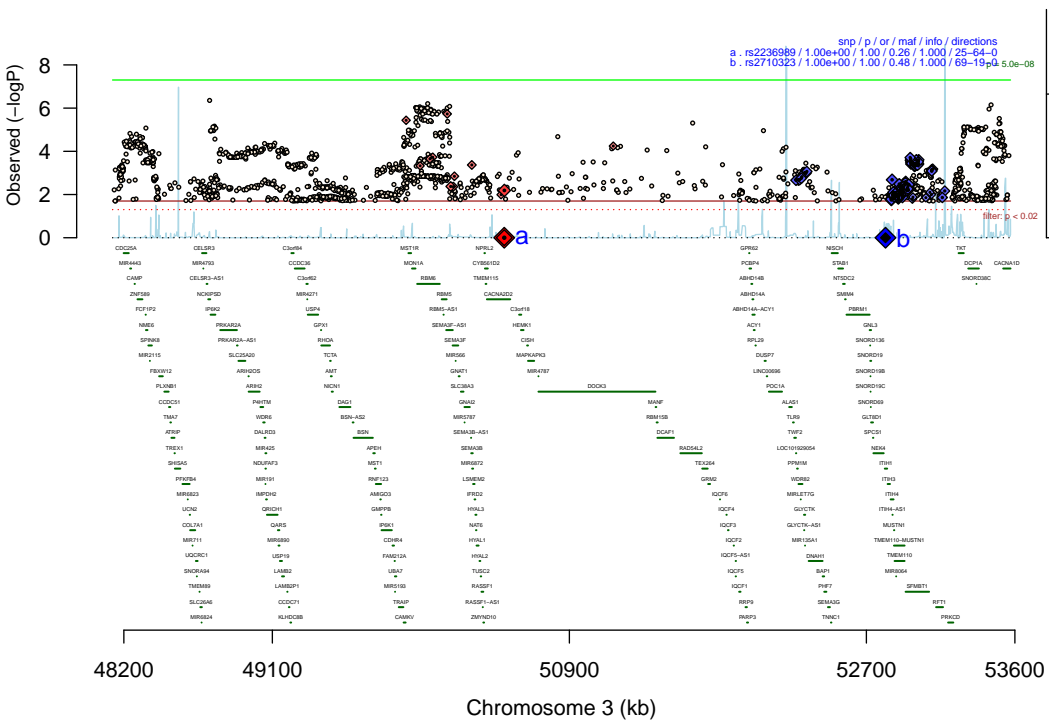

SCZ\_cond\_rs2710323-rs2236989-rs7633840-chr3

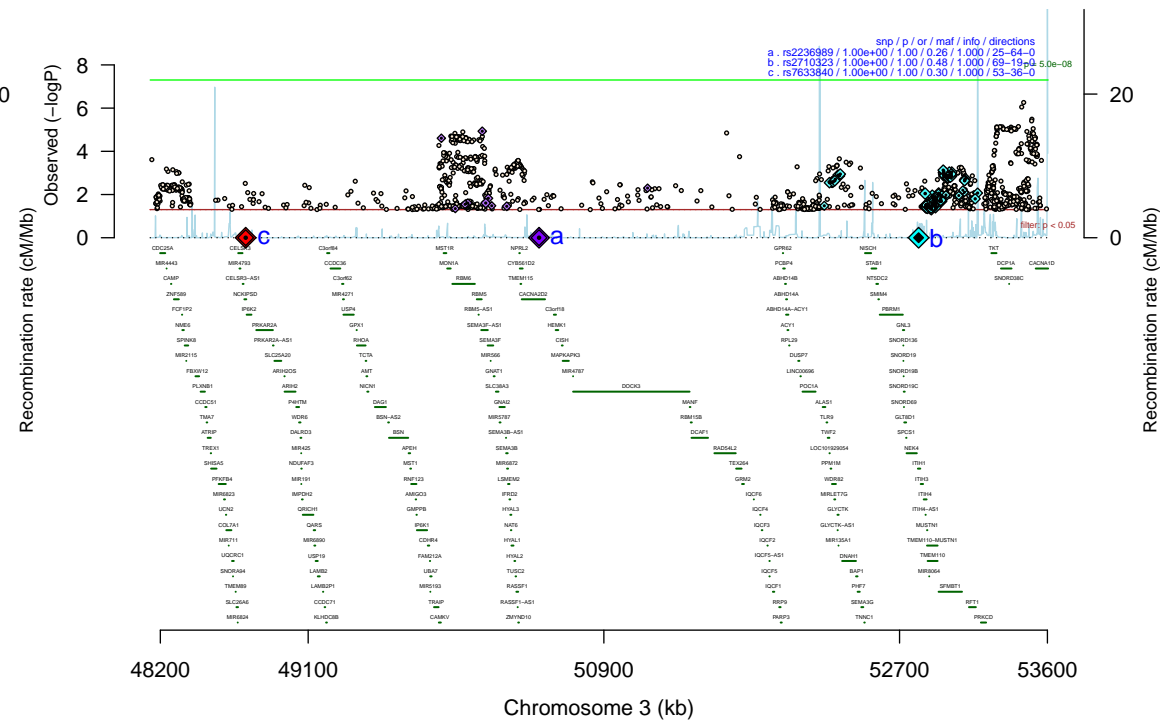

SCZ\_uncond-rs13230189-chr7

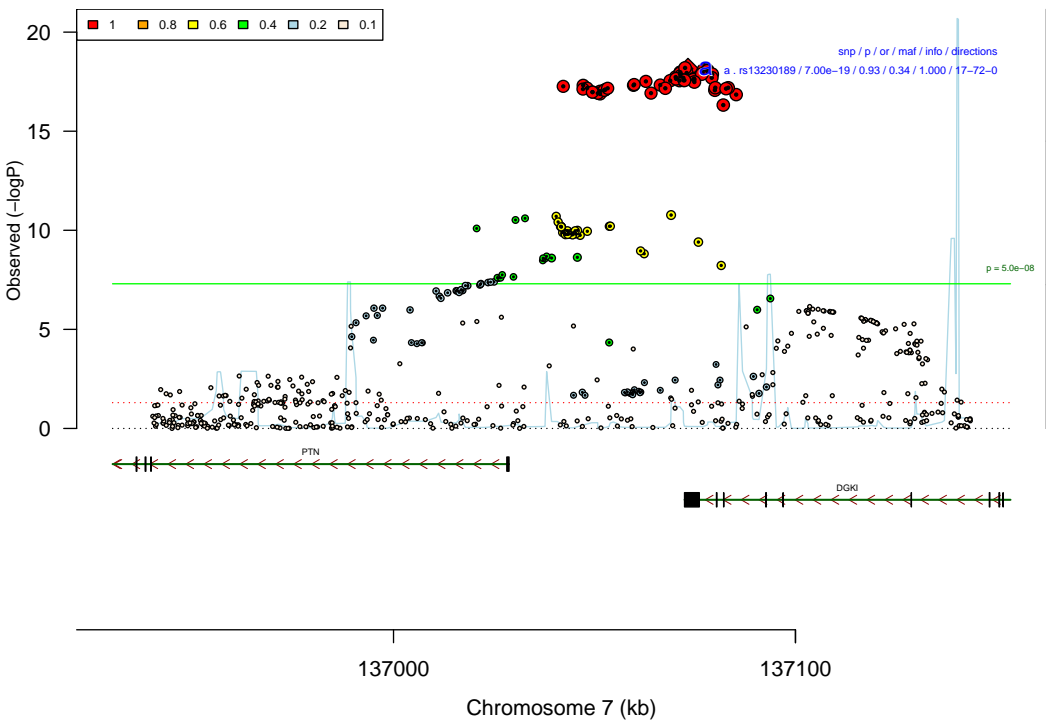

SCZ\_cond-rs13230189-chr7

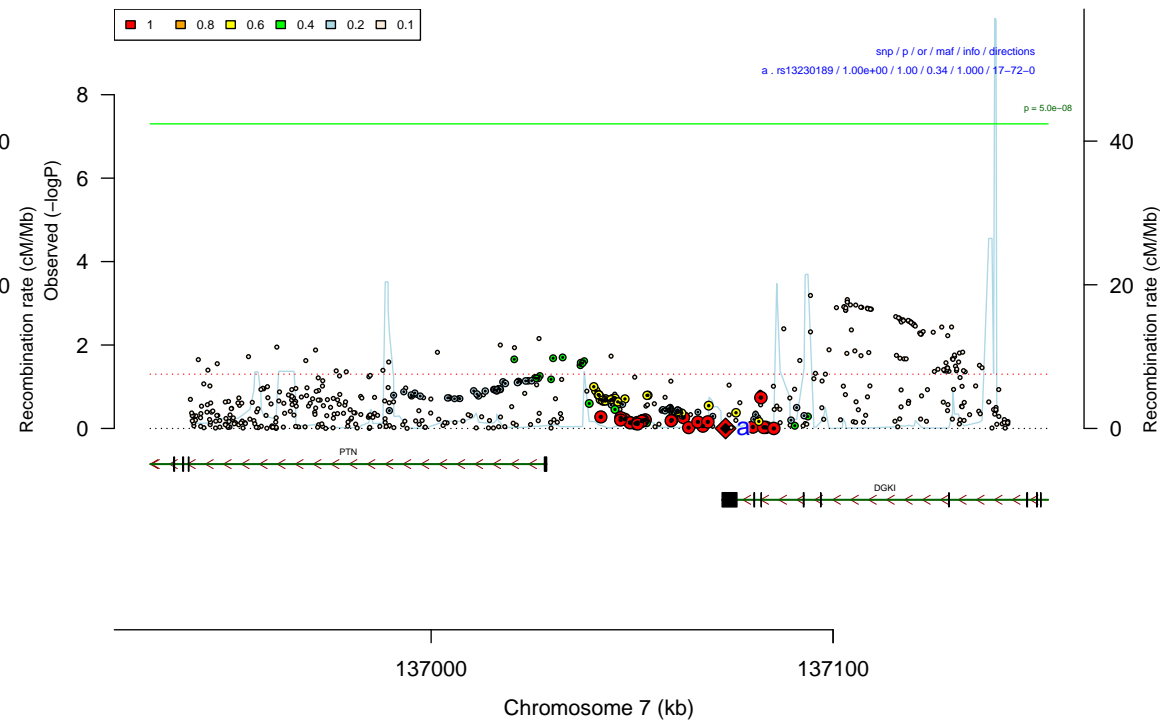

SCZ\_uncond-rs12129573-chr1

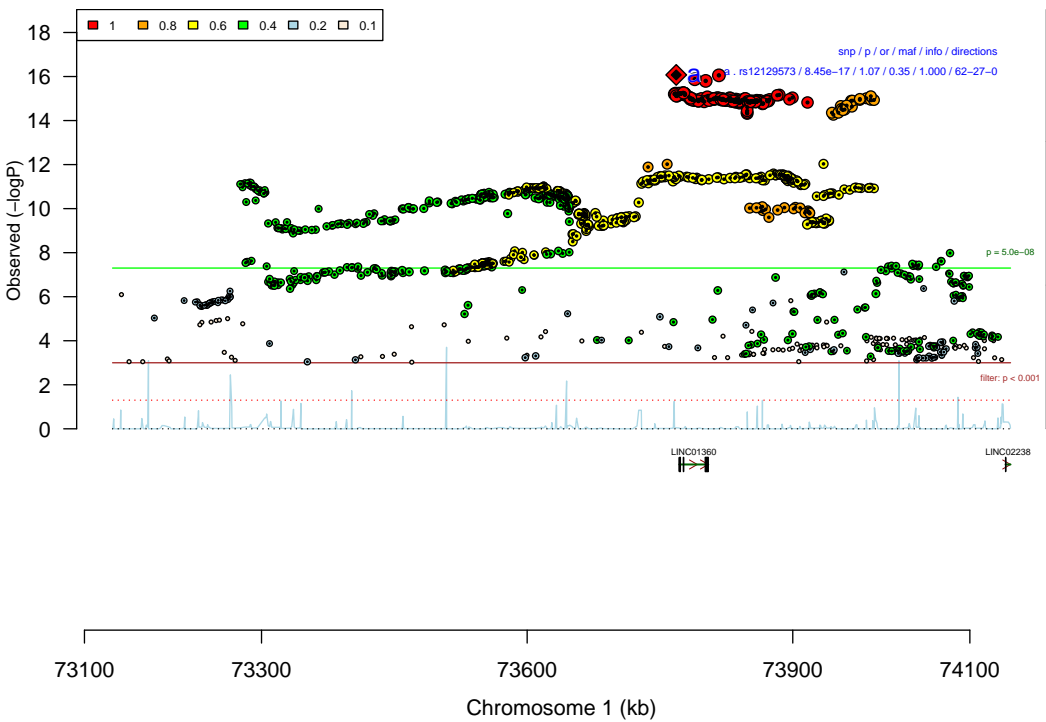

SCZ\_cond-rs12129573-chr1

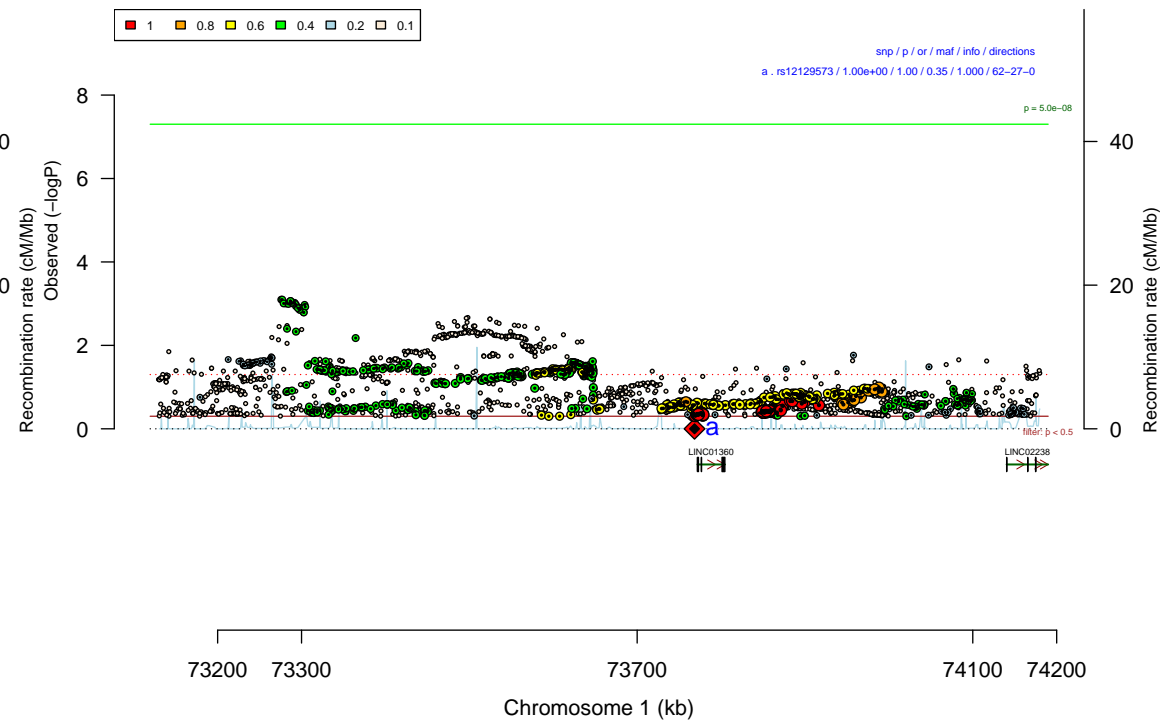



SCZ\_uncond-rs2190864-chr14

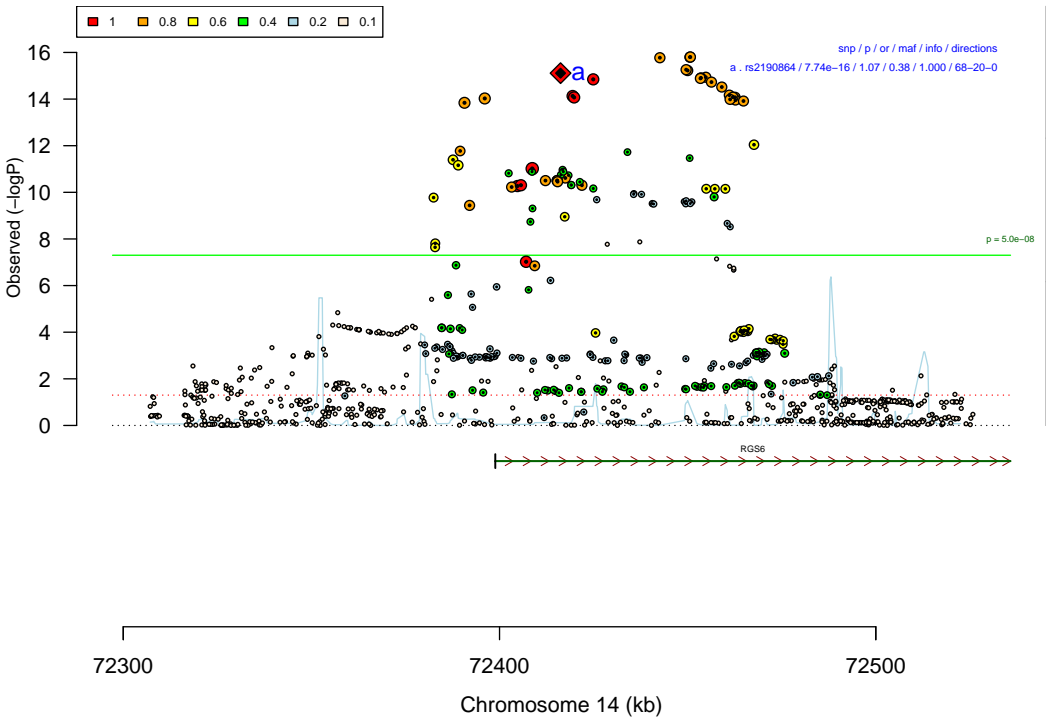

SCZ\_cond-rs2190864-chr14

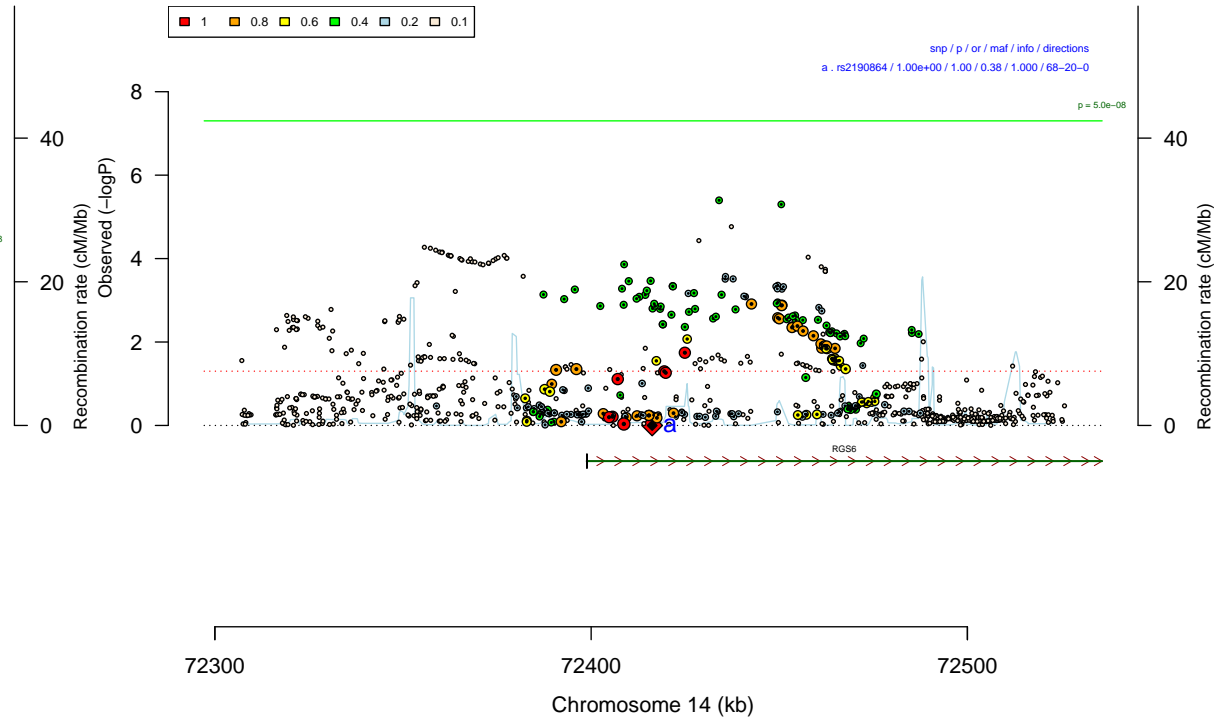

SCZ\_uncond-rs778371-chr2

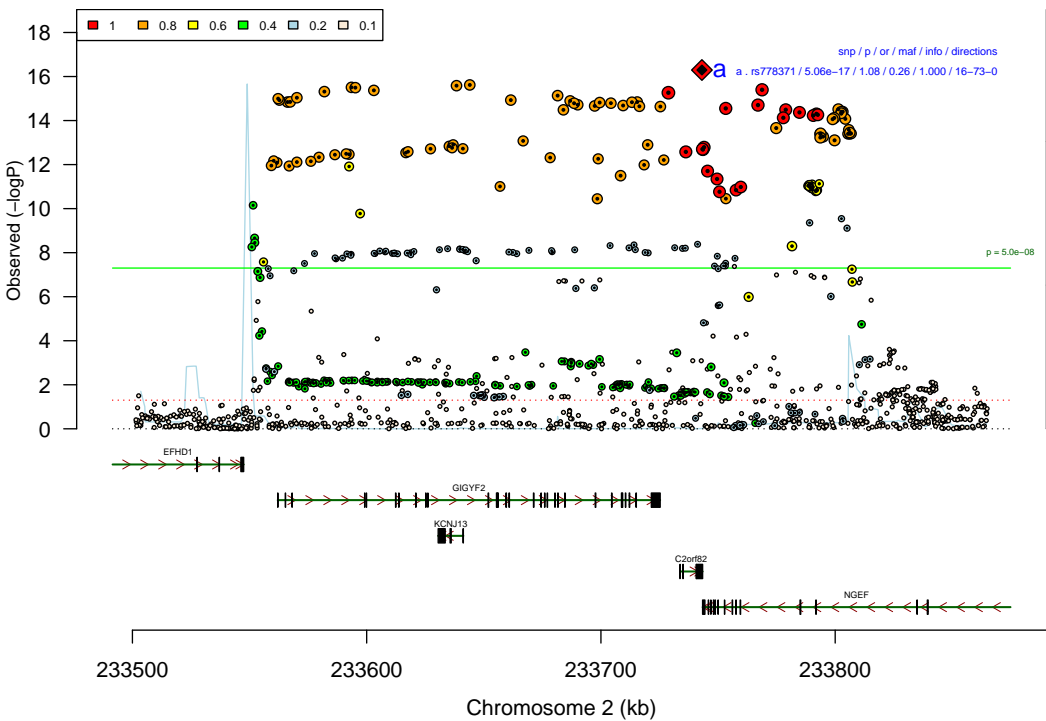

SCZ\_cond-rs778371-chr2

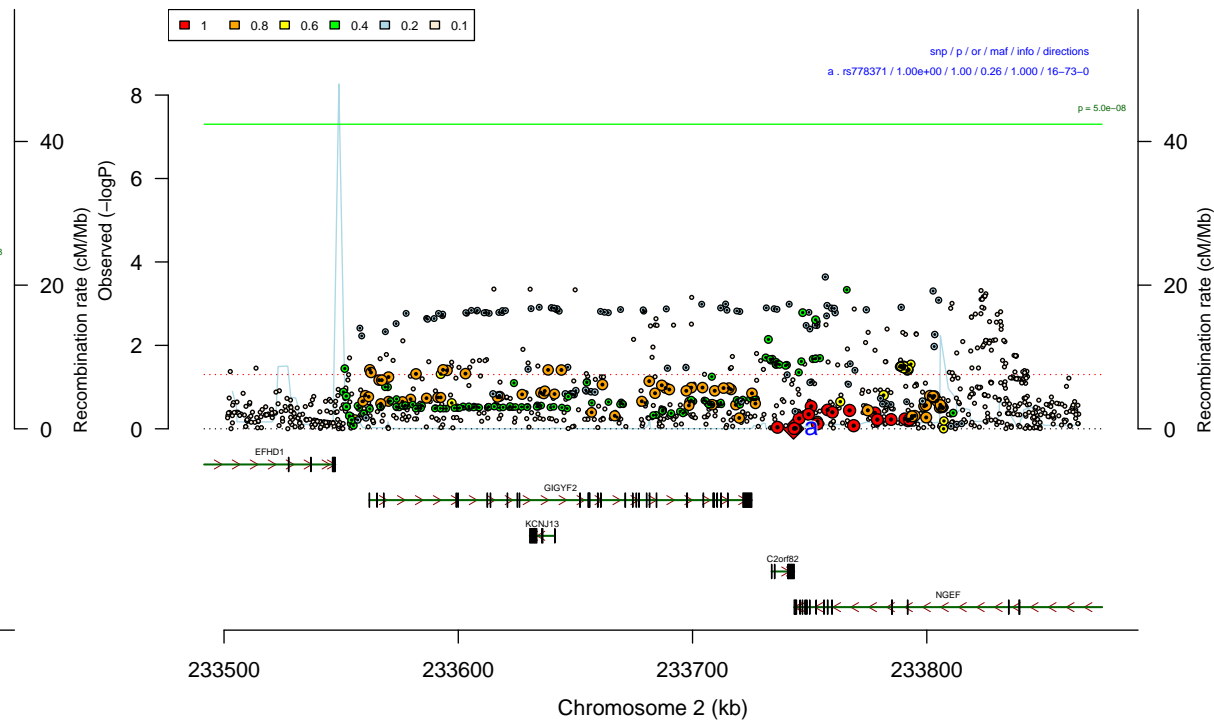

SCZ\_uncond-rs7647398-chr3

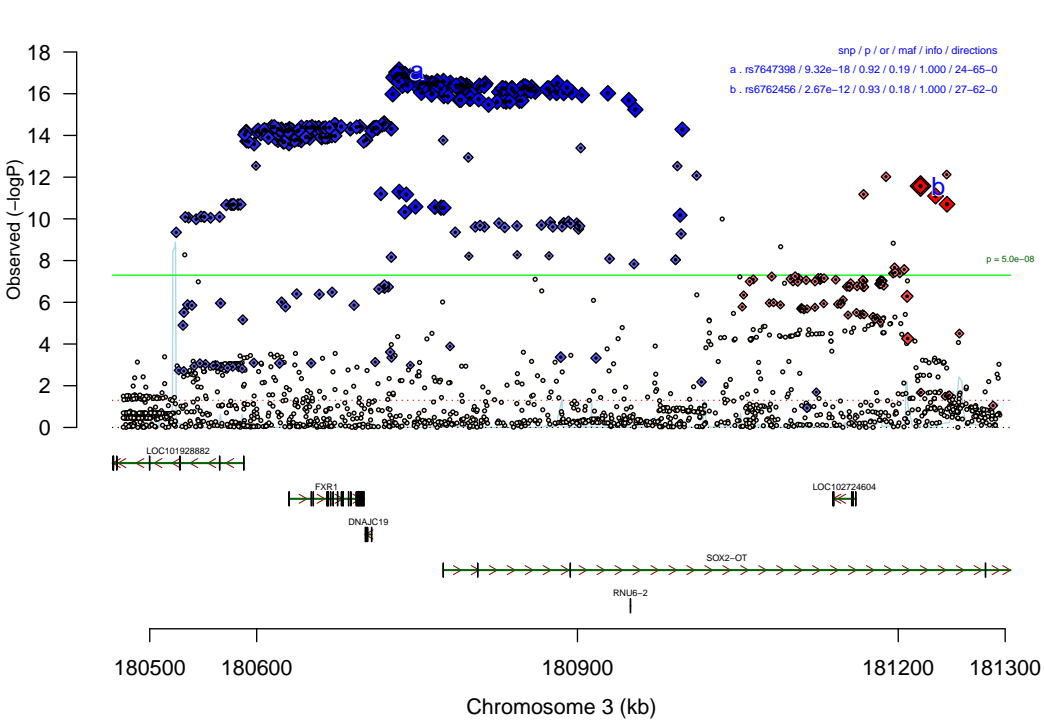

SCZ\_cond\_rs7647398-chr3

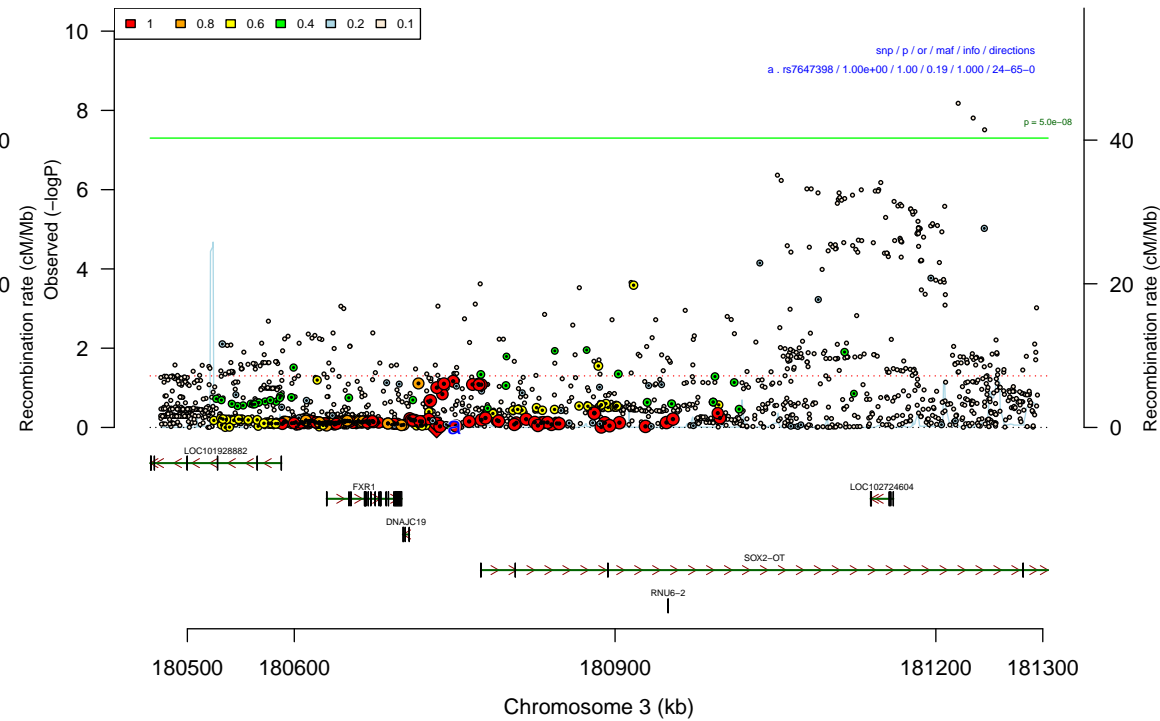

SCZ\_cond\_rs7647398-rs6762456-chr3

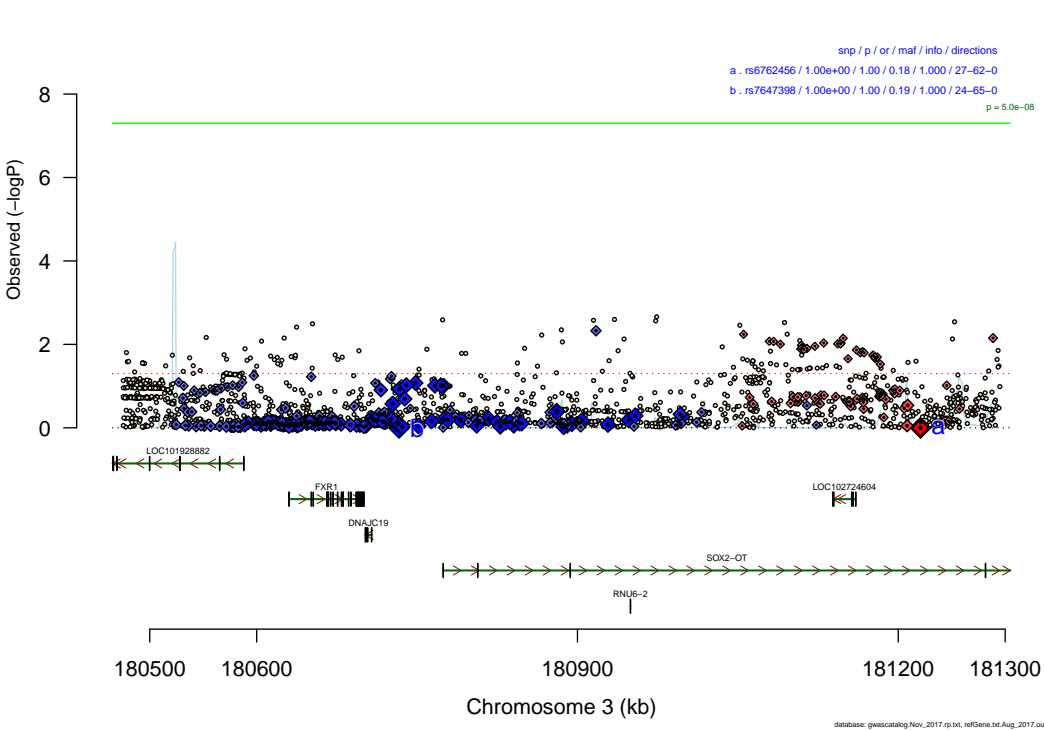

SCZ\_uncond-rs7701440-chr5

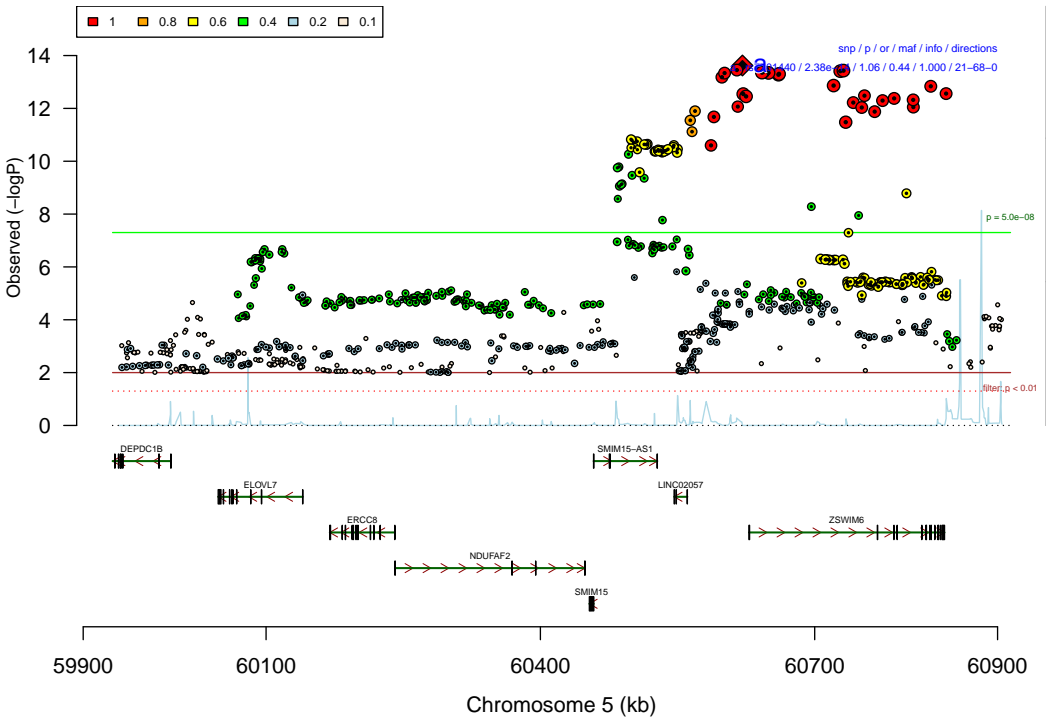

SCZ\_cond-rs7701440-chr5

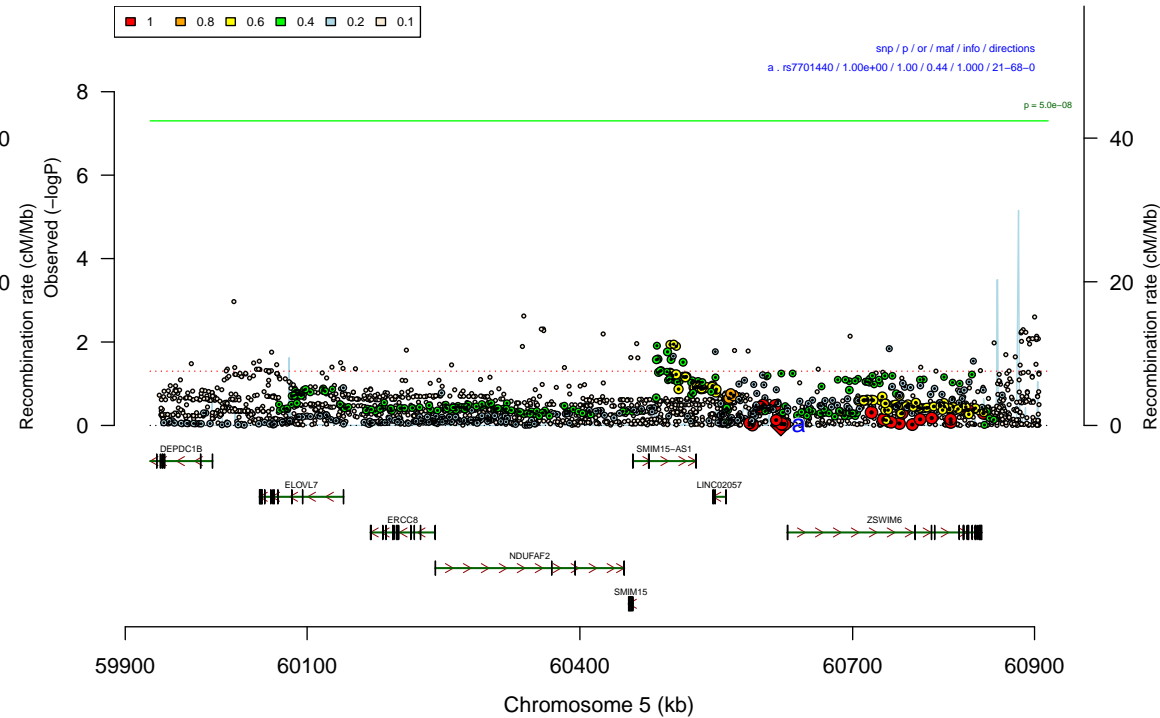

SCZ\_uncond-rs4766428-chr12

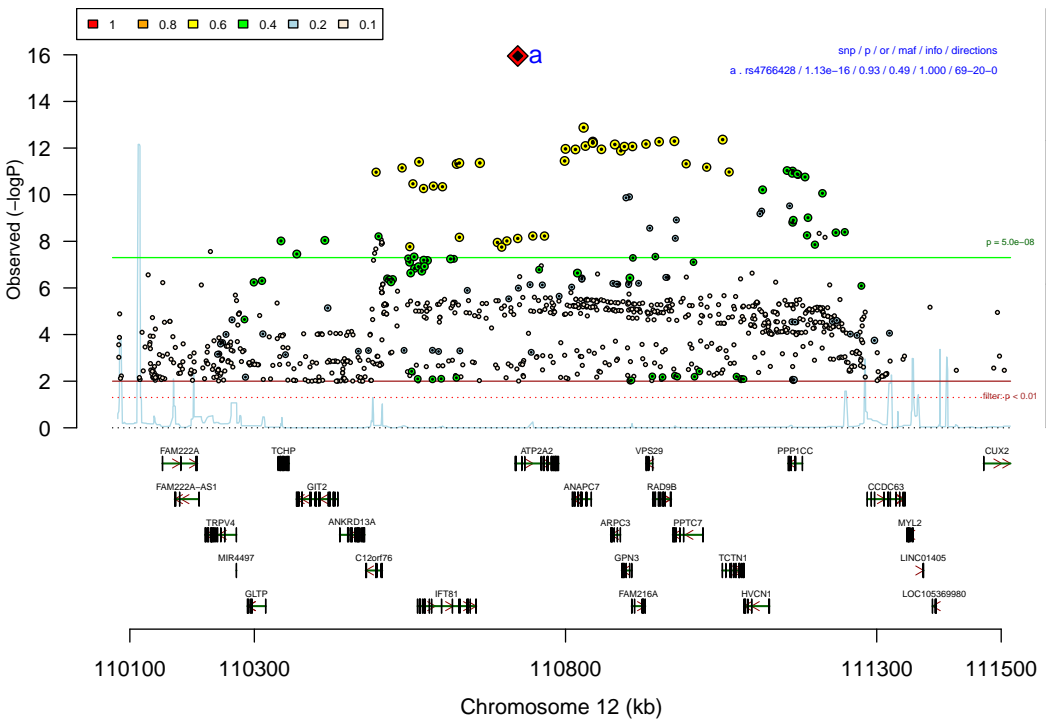

SCZ\_cond-rs4766428-chr12

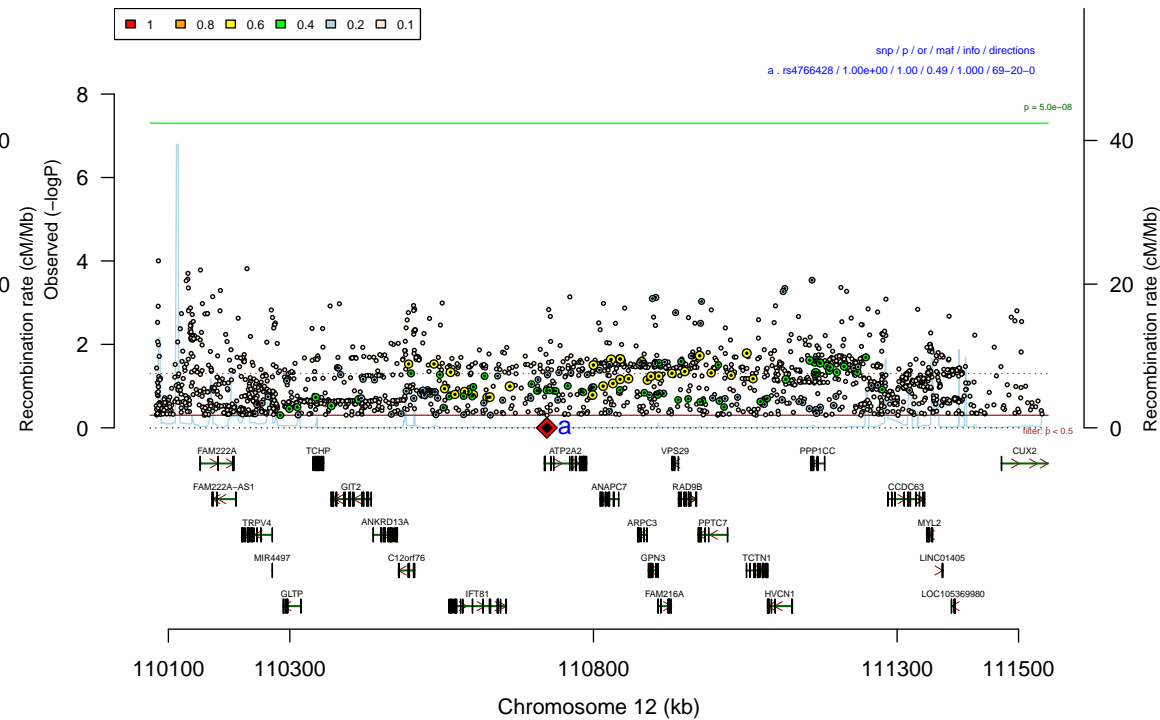

SCZ\_uncond-rs72980087-chr18

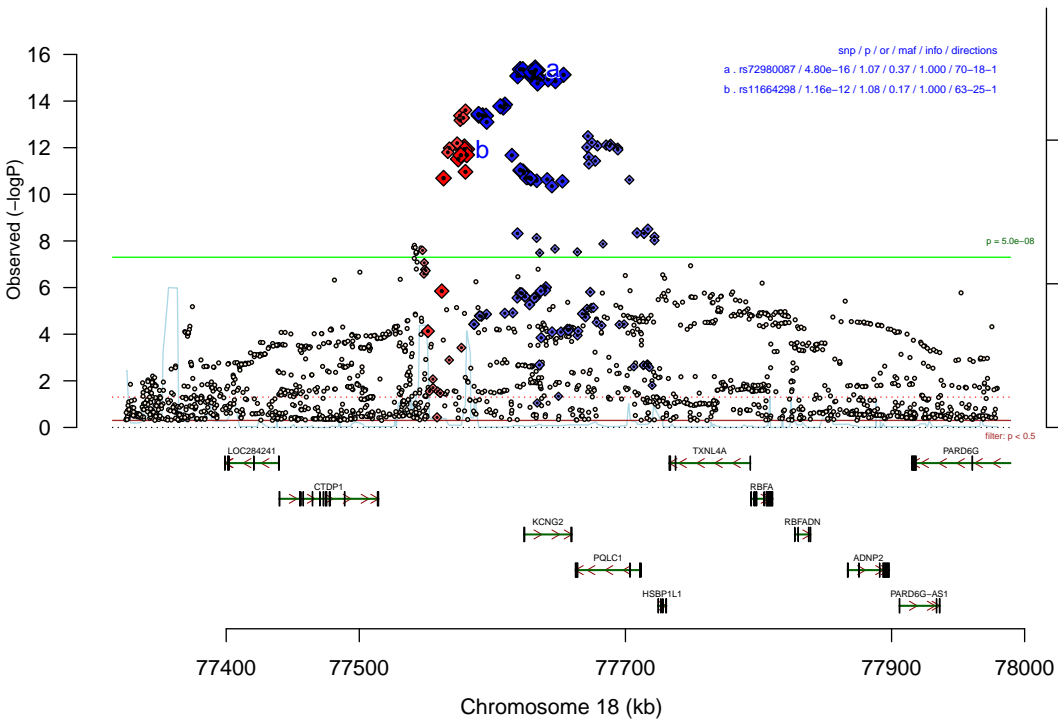

SCZ\_cond\_rs72980087-chr18

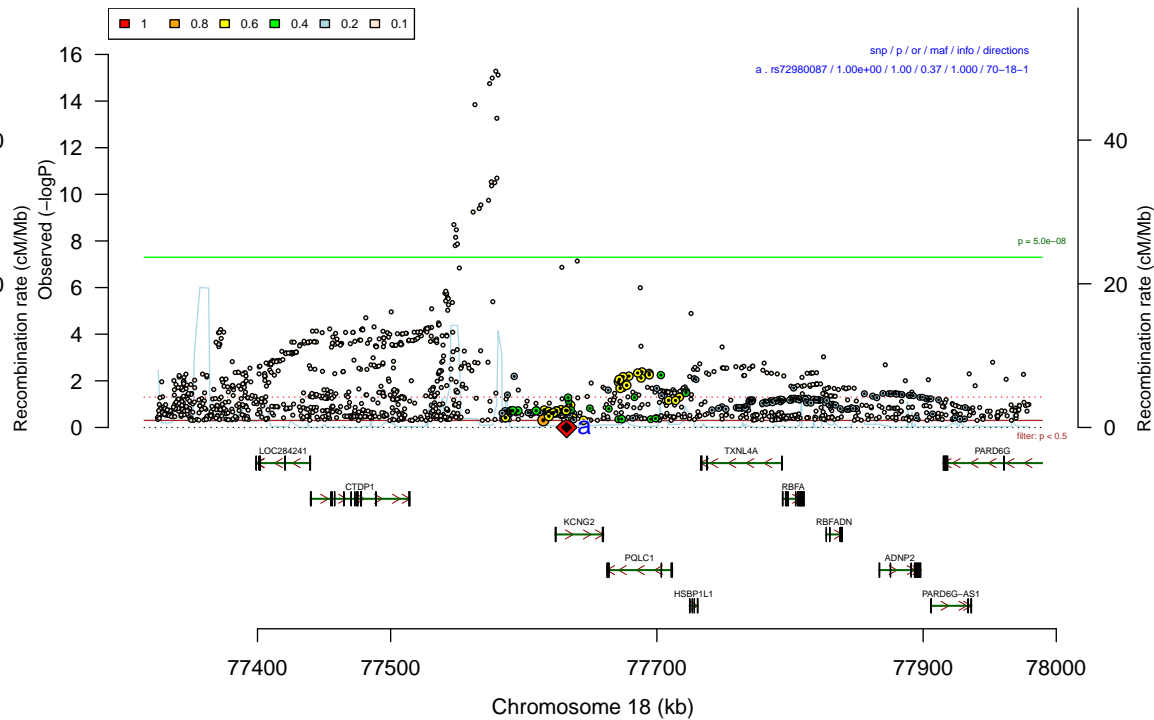

SCZ\_cond\_rs72980087-rs11664298-chr18

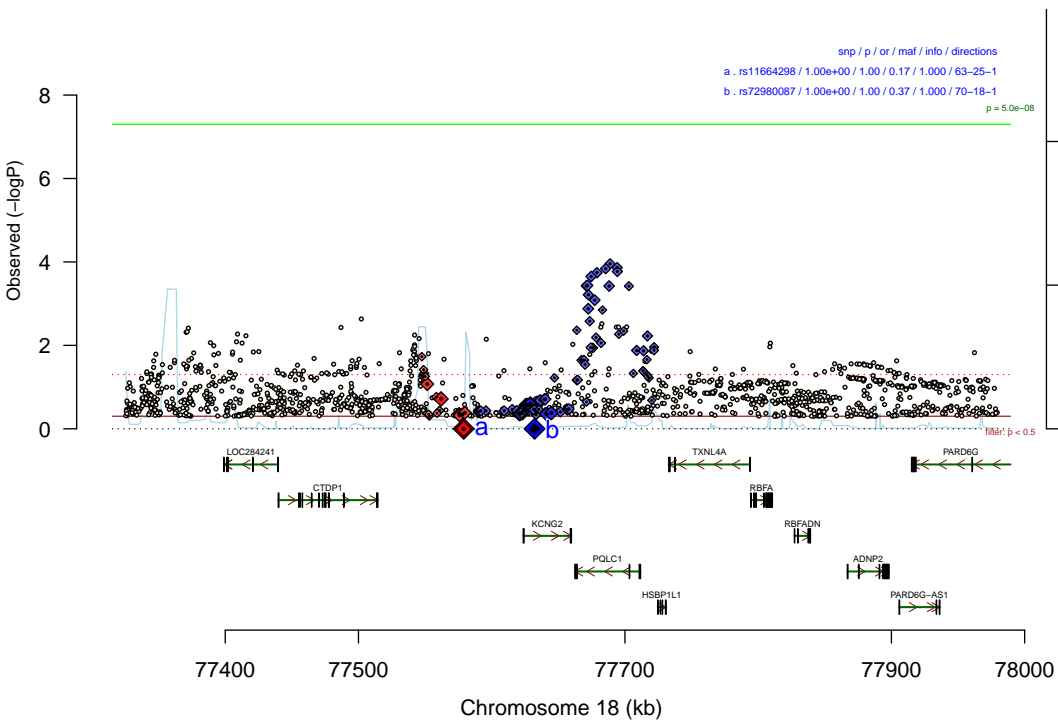

SCZ\_uncond-rs12285419-chr11

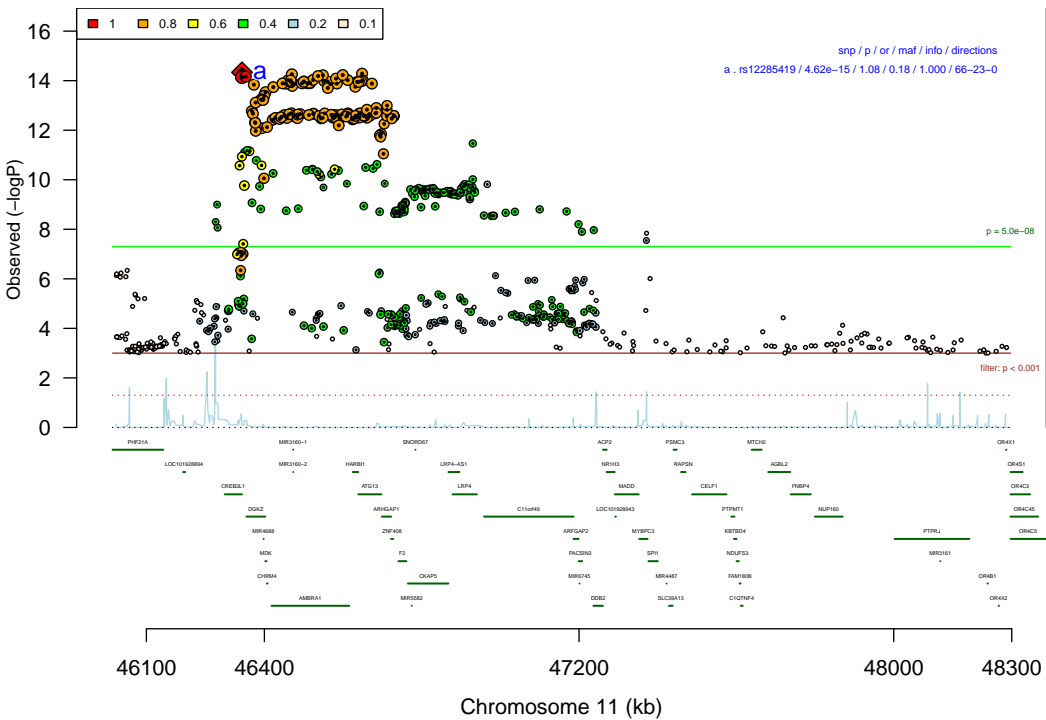

SCZ\_cond-rs12285419-chr11

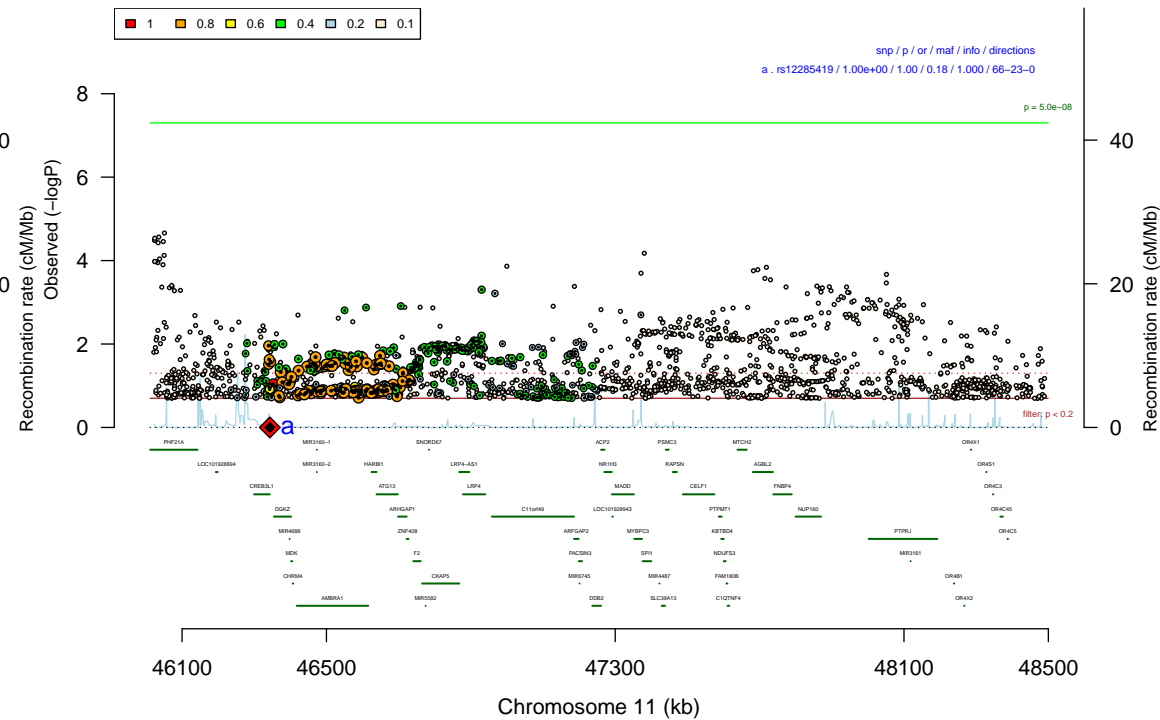

SCZ\_uncond-rs2514218-chr11

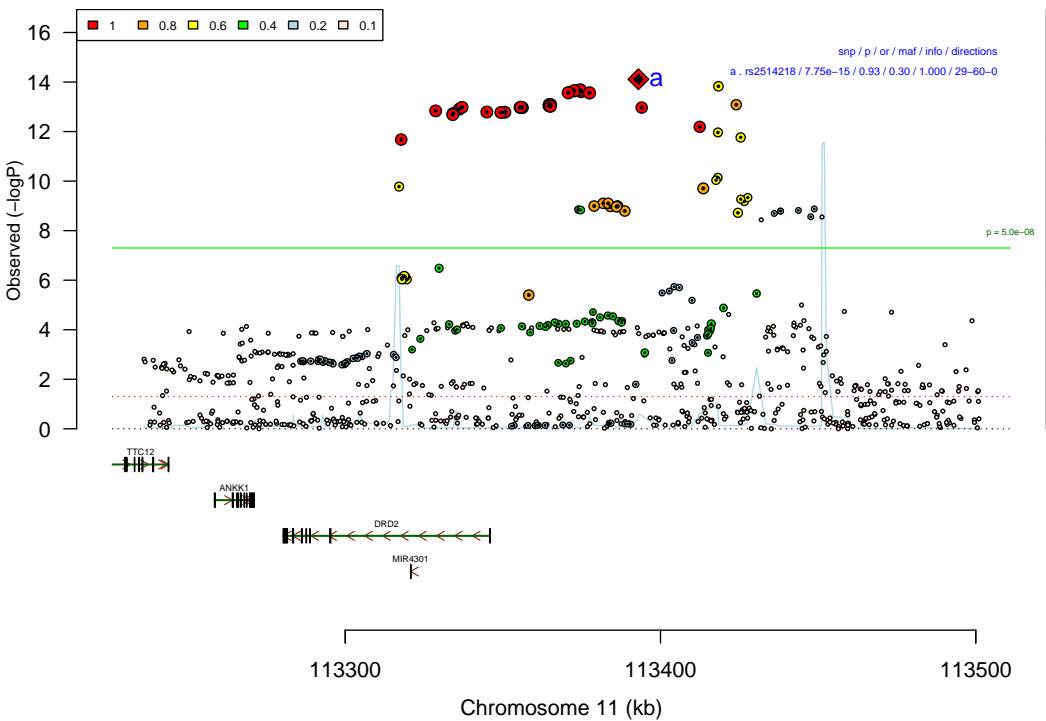

SCZ\_cond-rs2514218-chr11

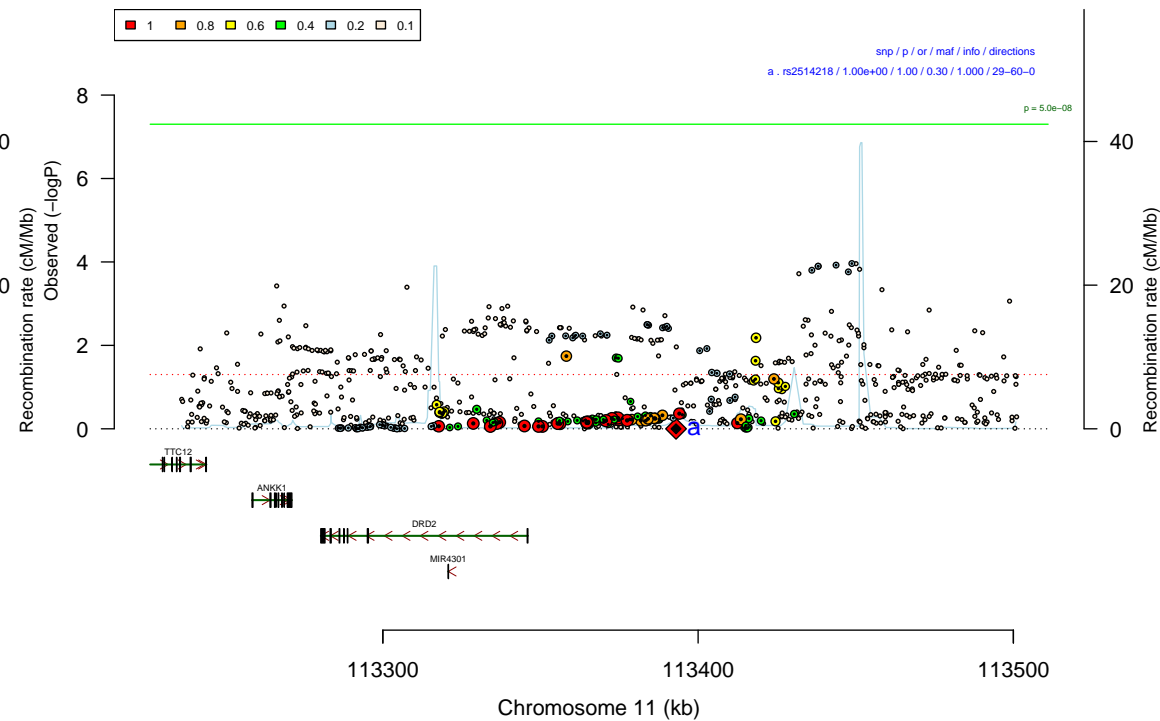

SCZ\_uncond-rs1658810-chr2

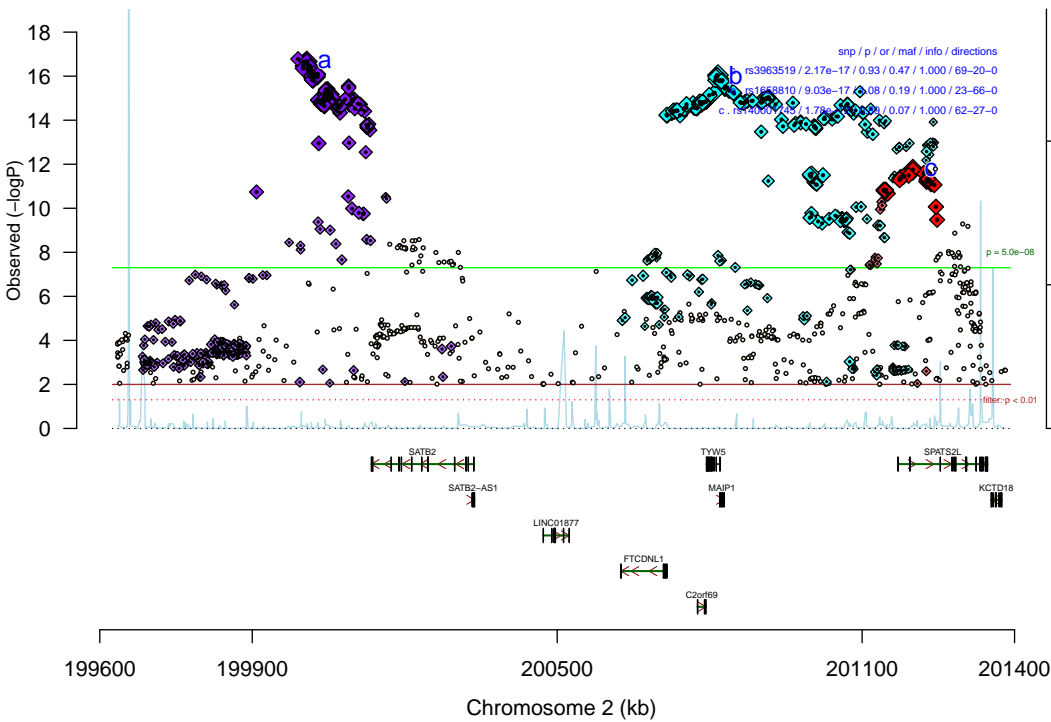

SCZ\_cond-rs1658810-chr2

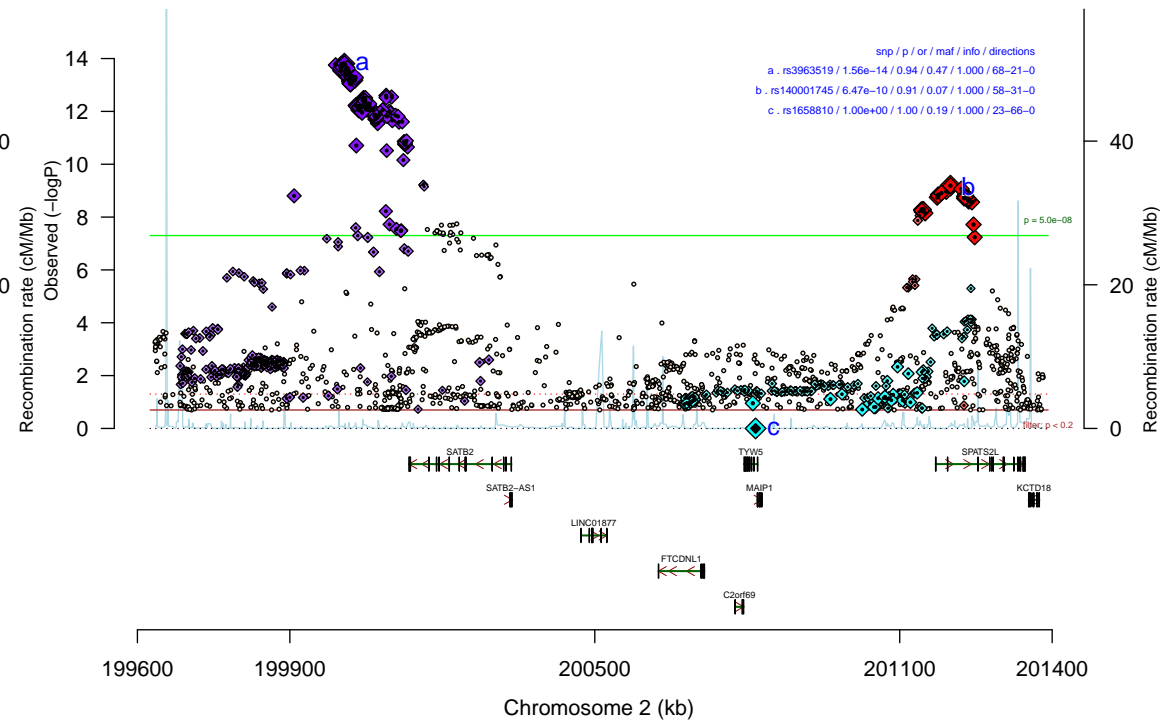

SCZ\_cond-rs1658810-rs3963519-chr2

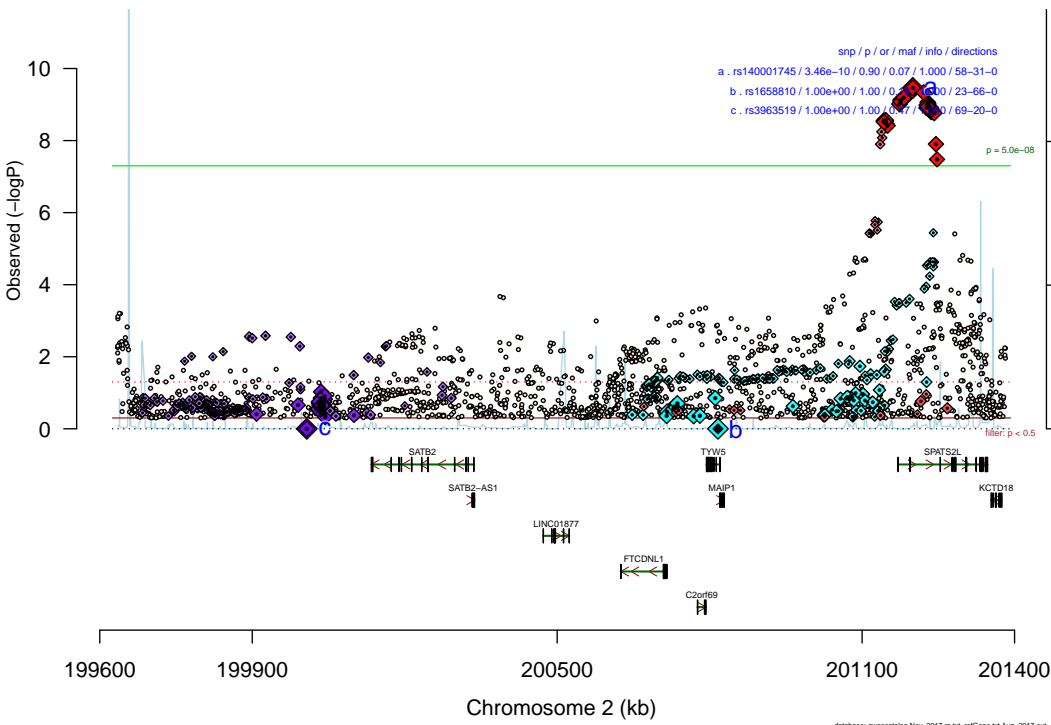

SCZ\_cond-rs1658810-rs3963519-rs140001745-chr2

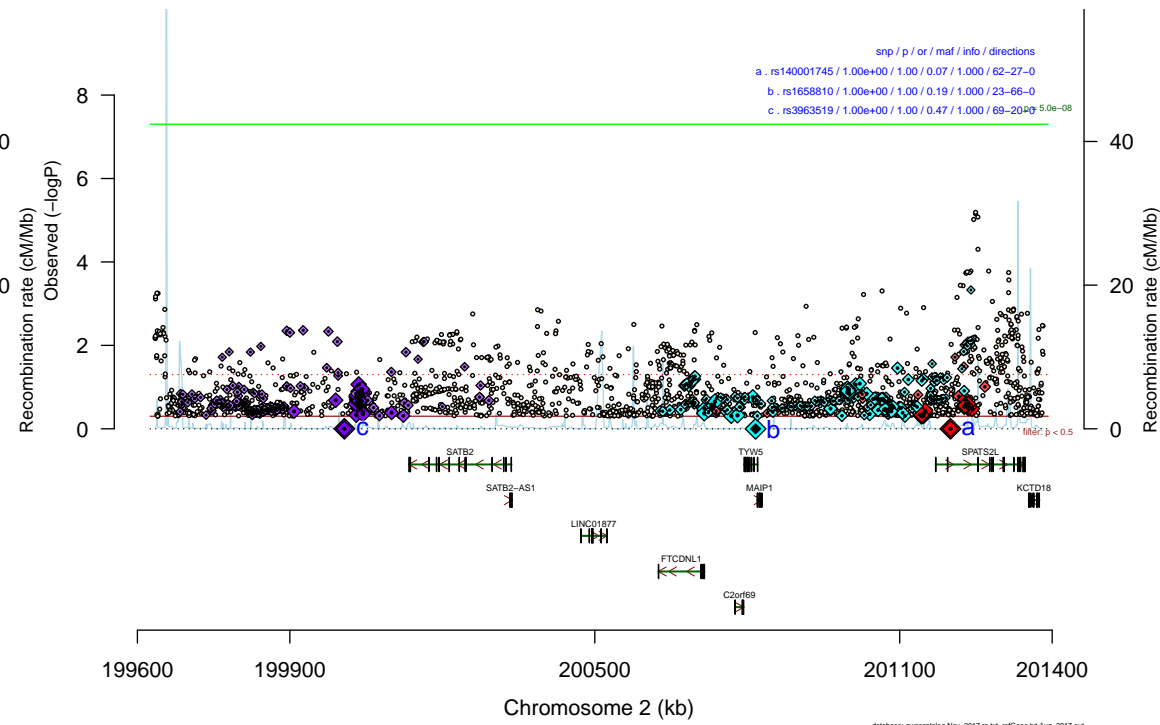

SCZ\_uncond-rs11210892-chr1

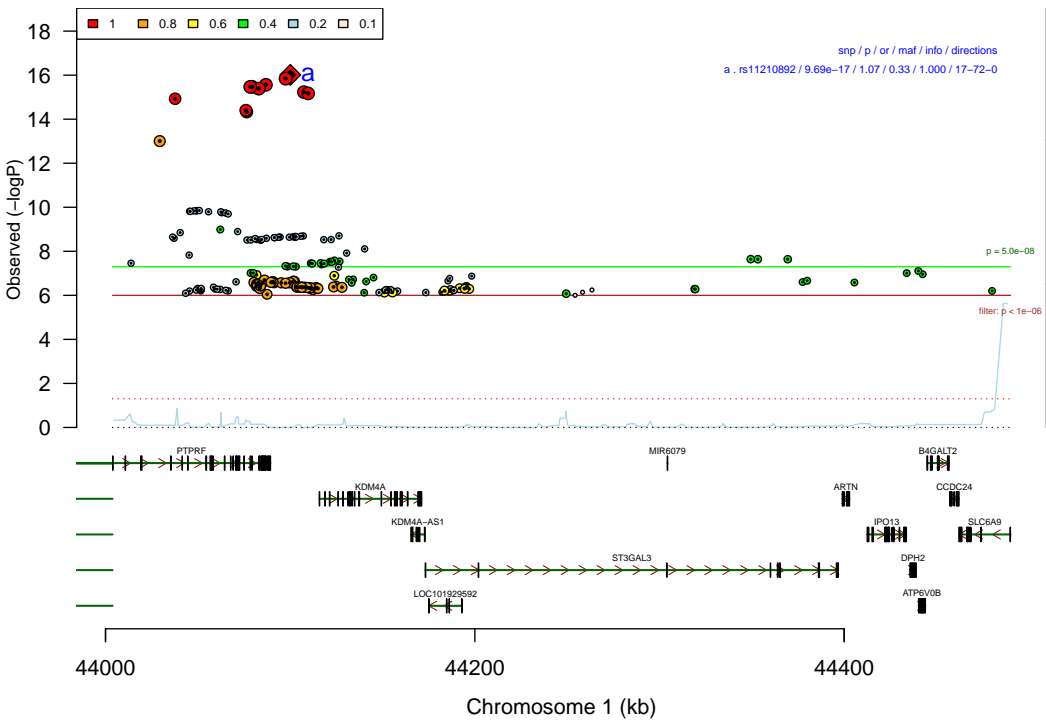

SCZ\_cond-rs11210892-chr1

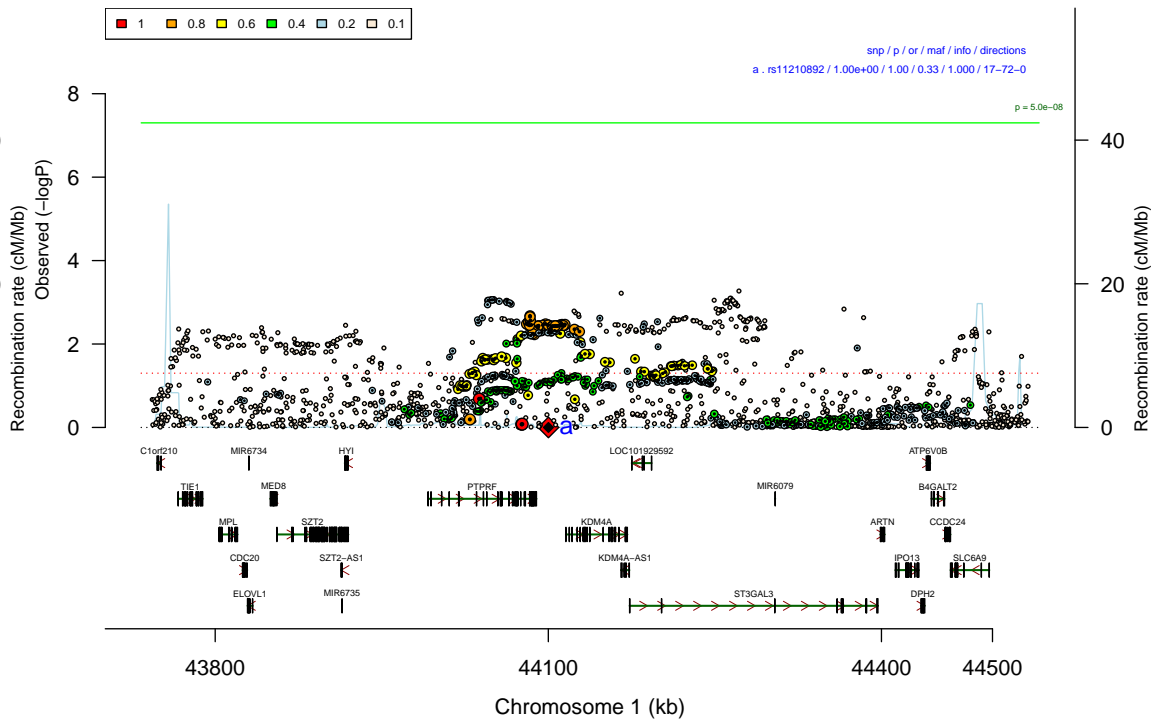



SCZ\_uncond-rs6943762-chr7

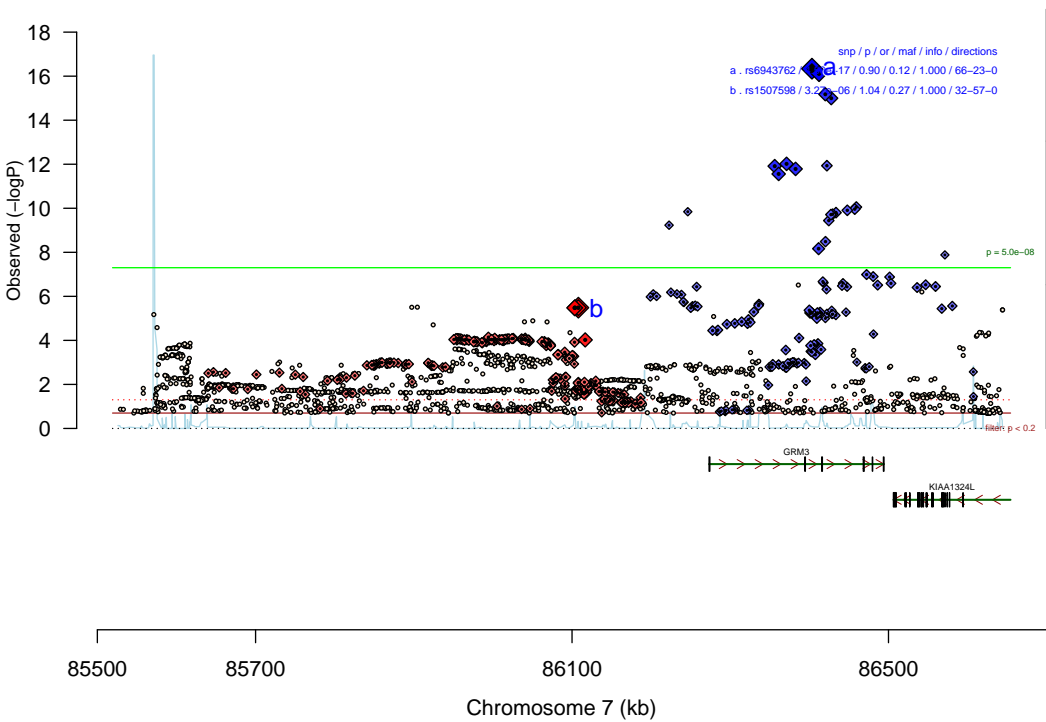

SCZ\_cond\_rs6943762-chr7

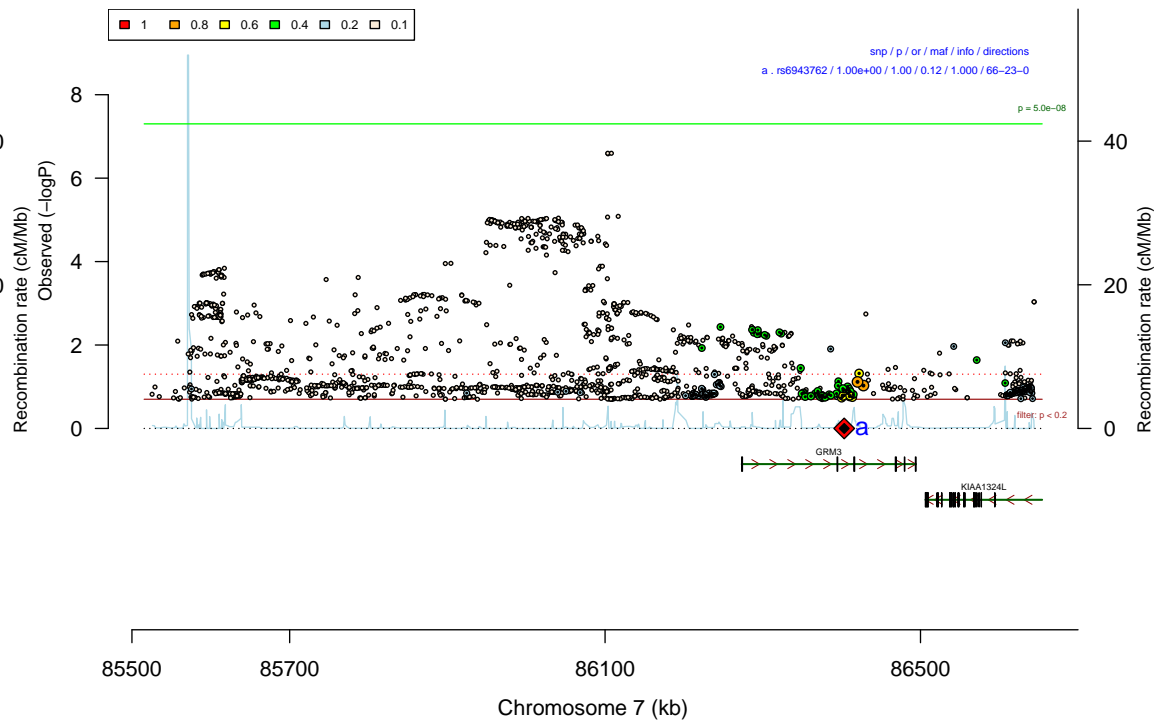

SCZ\_cond\_rs6943762-rs1507598-chr7

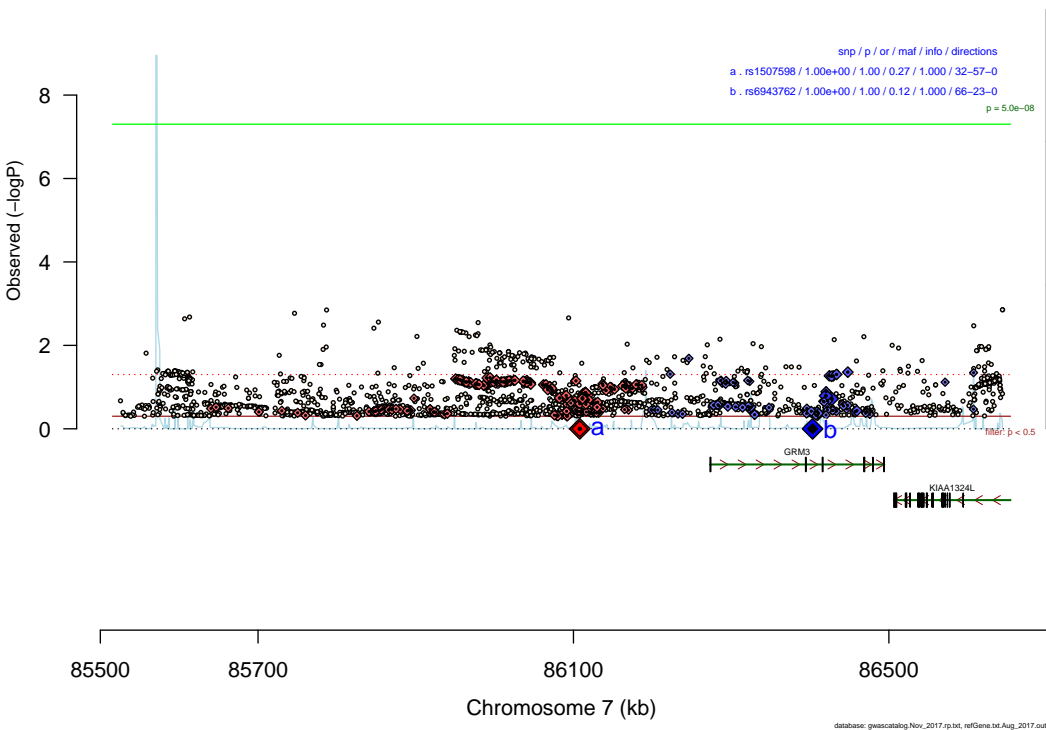



SCZ\_uncond-rs6065094-chr20

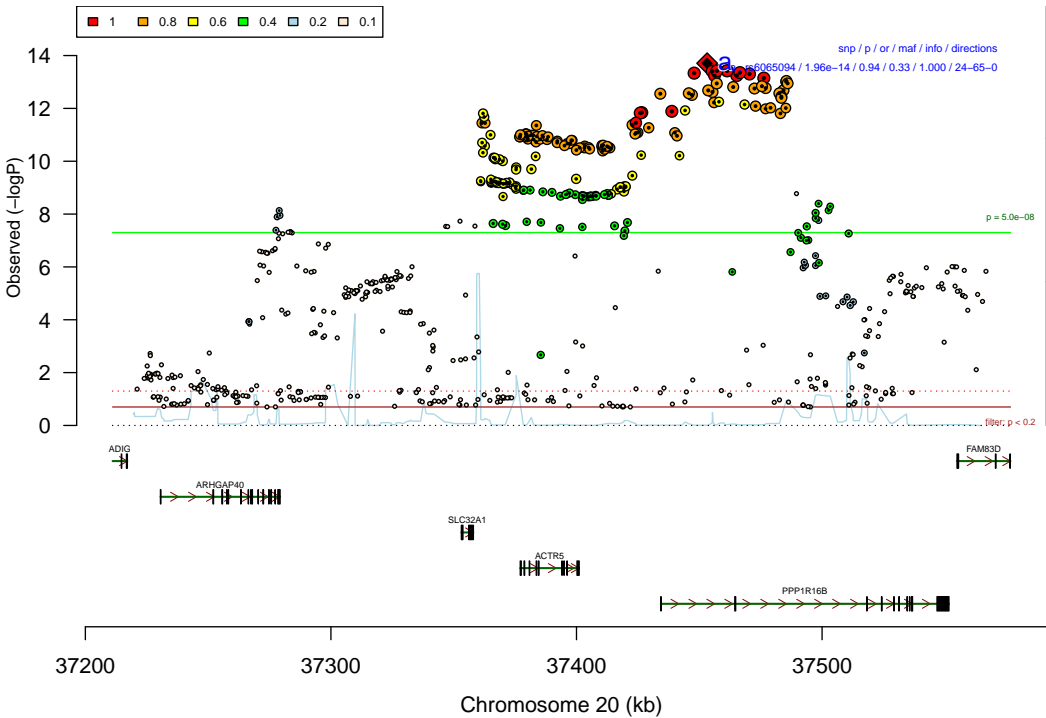

SCZ\_cond-rs6065094-chr20

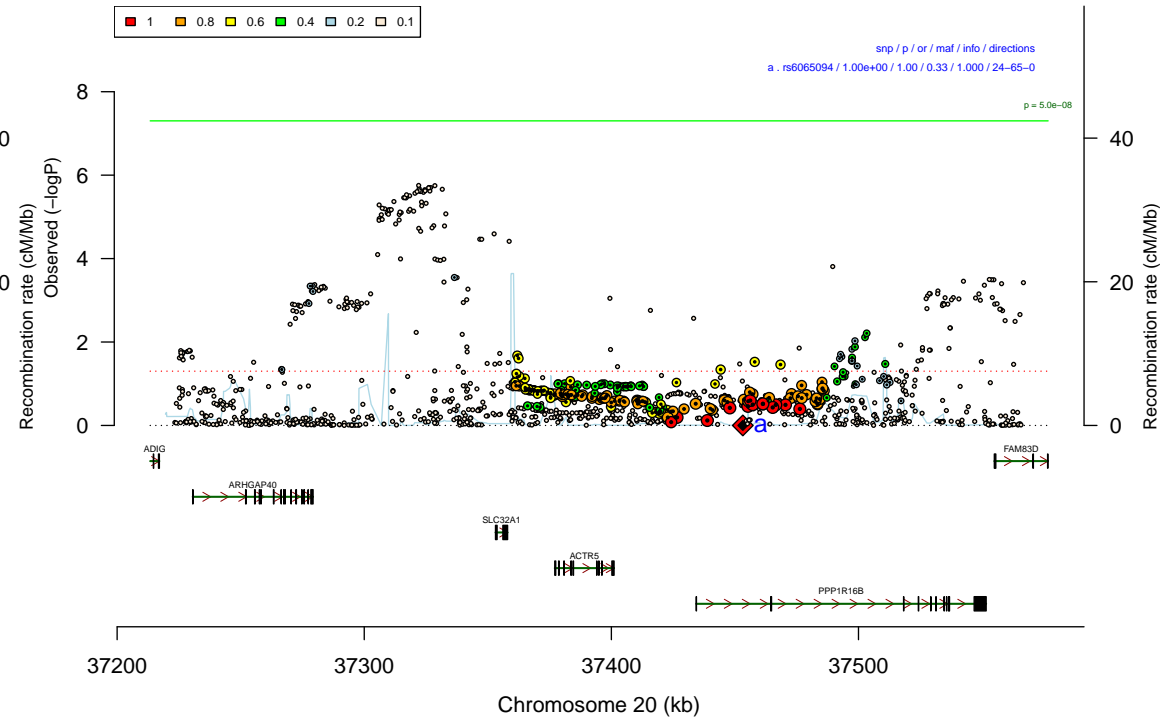

SCZ\_uncond-rs2456020-chr15

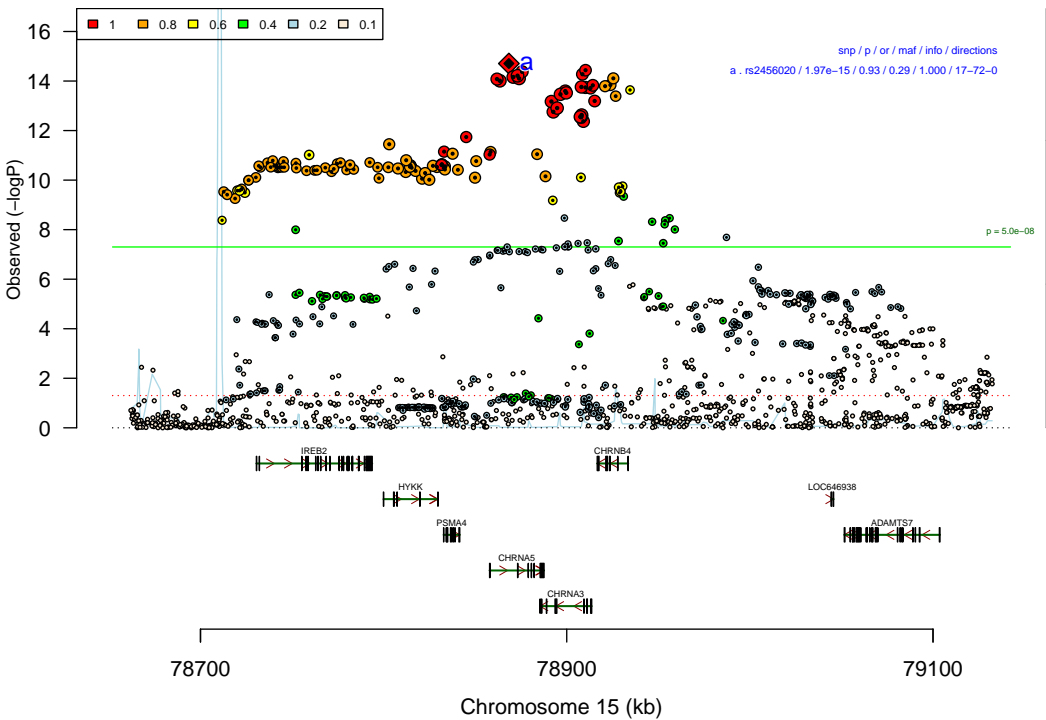

SCZ\_cond-rs2456020-chr15

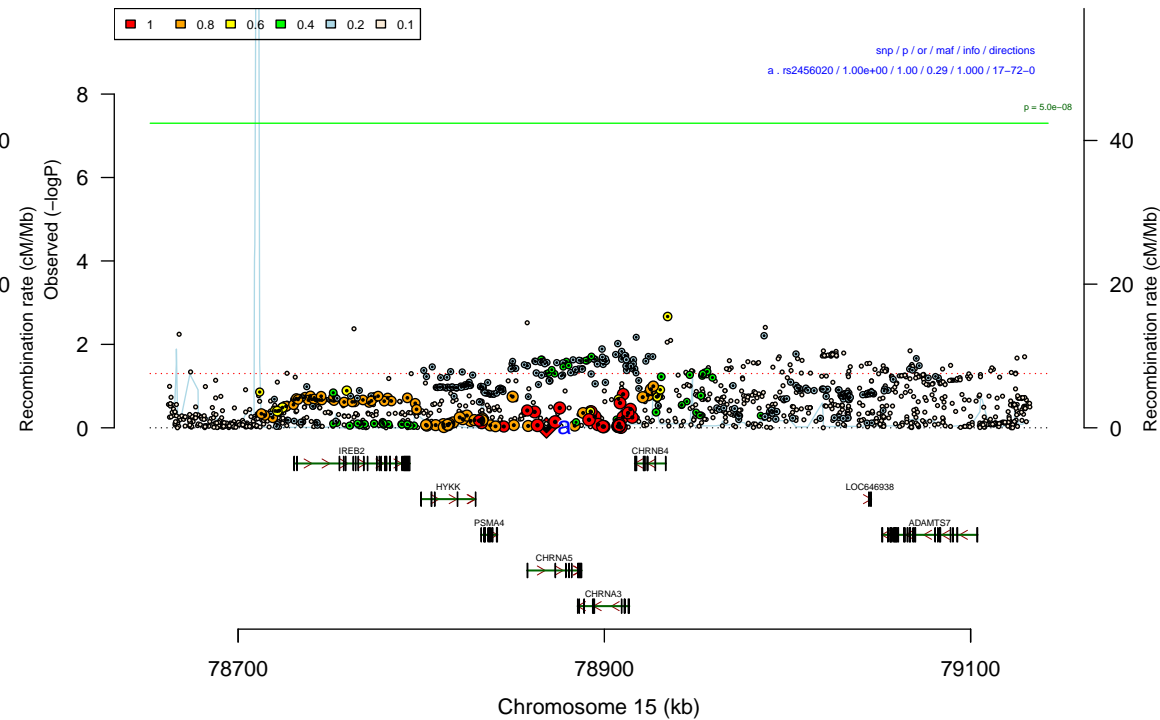

SCZ\_uncond-rs10035564-chr5

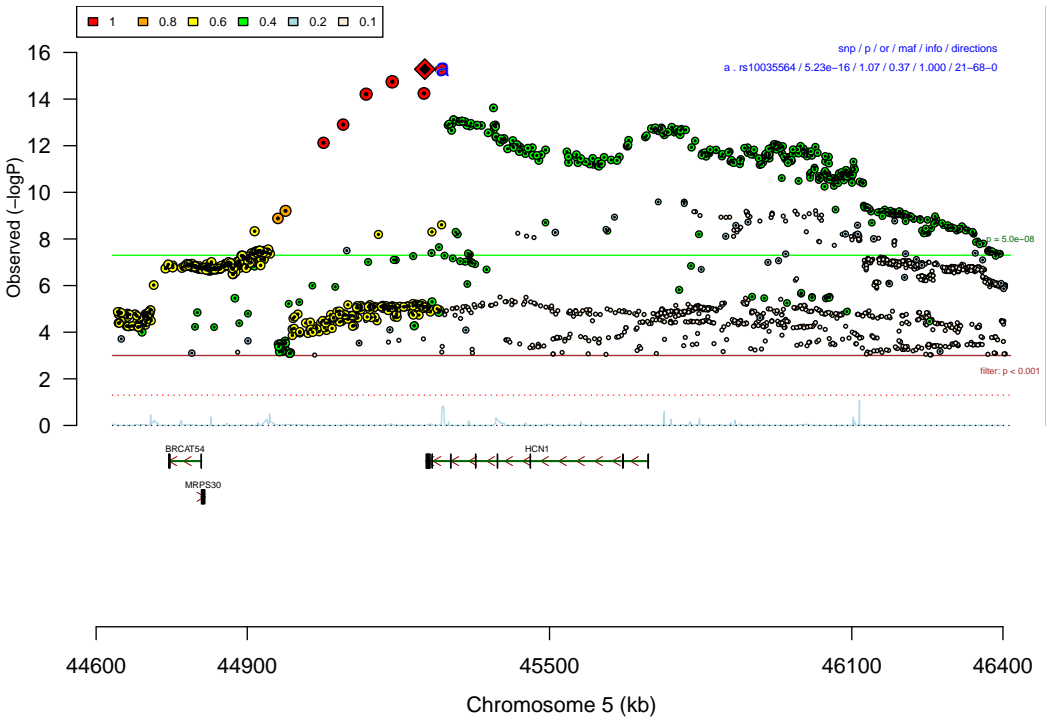

SCZ\_cond-rs10035564-chr5

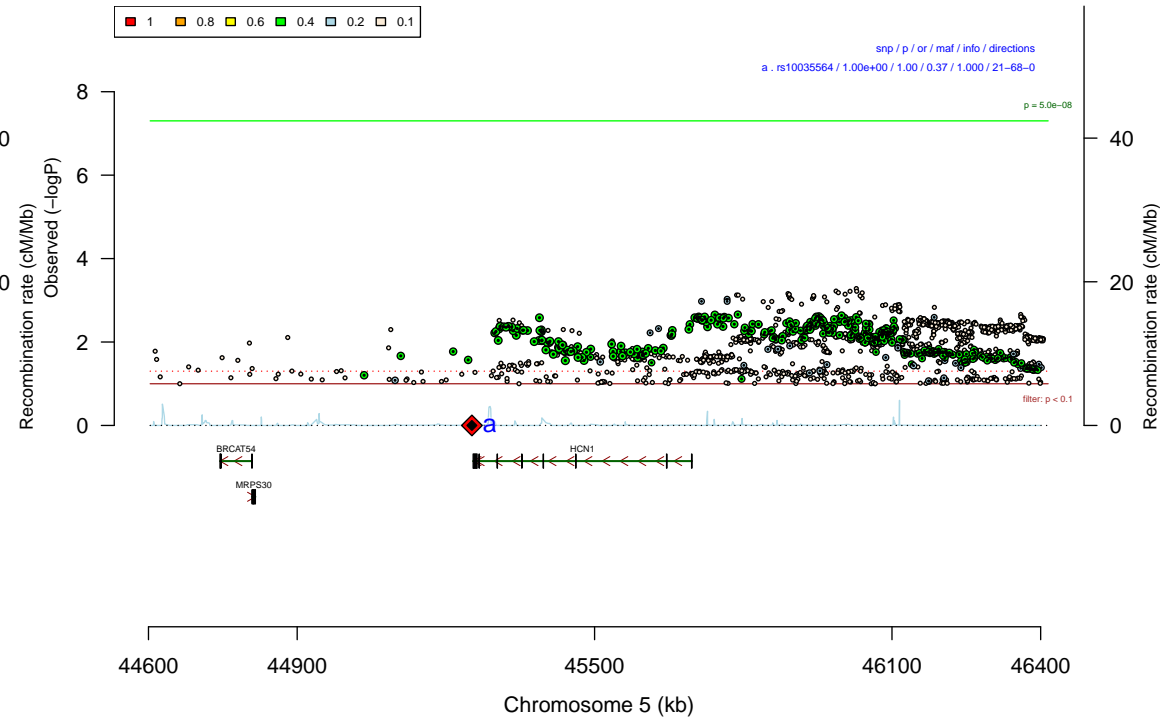

SCZ\_uncond-rs1858999-chr19

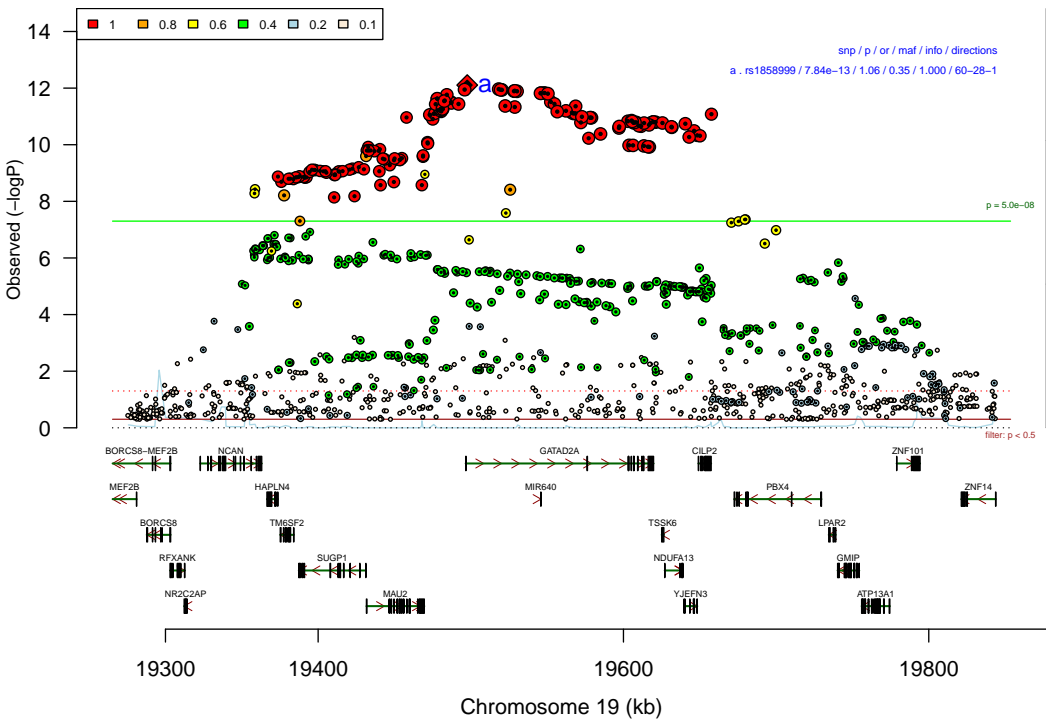

SCZ\_cond-rs1858999-chr19

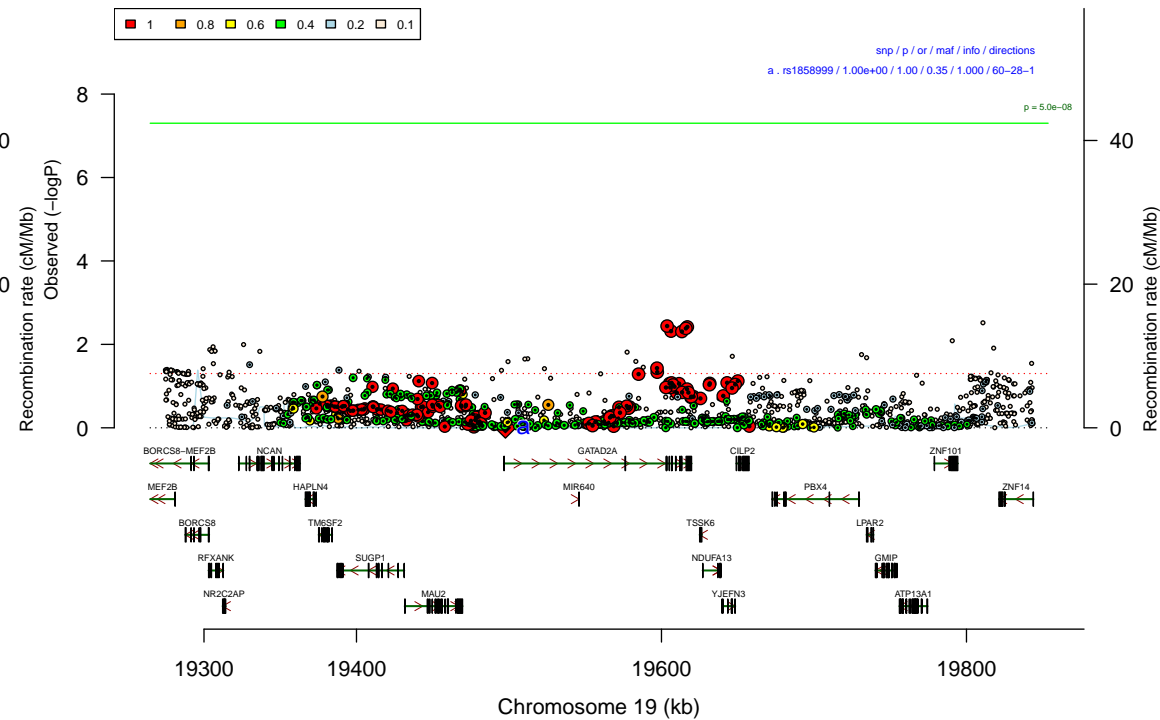

SCZ\_uncond-rs61937595-chr12

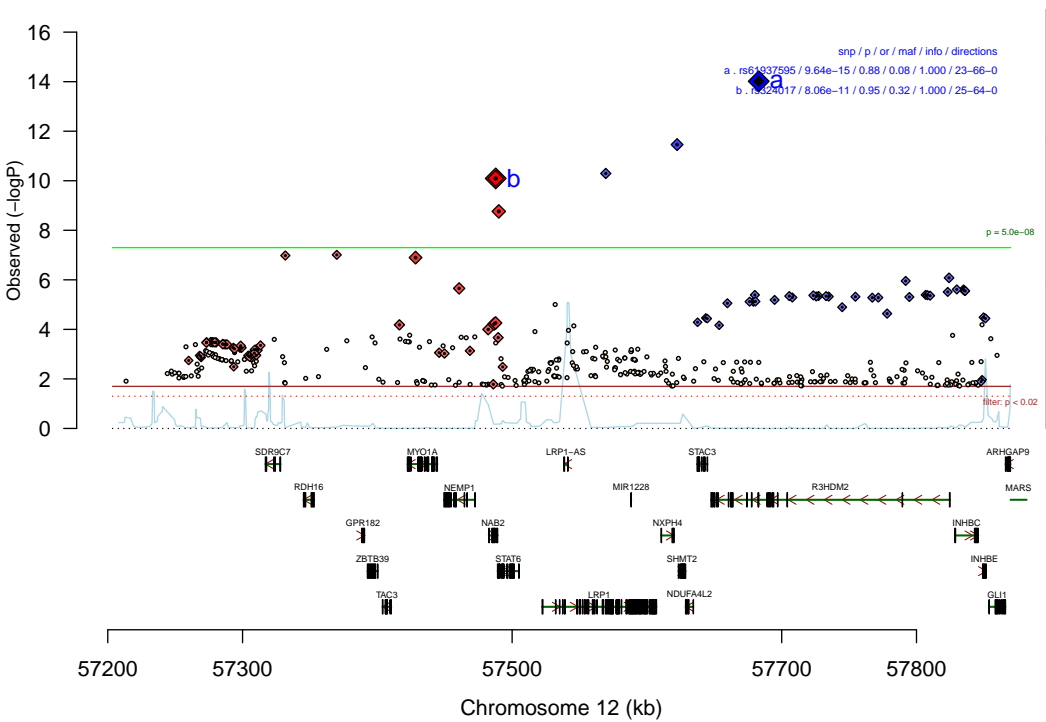

SCZ\_cond\_rs61937595-chr12

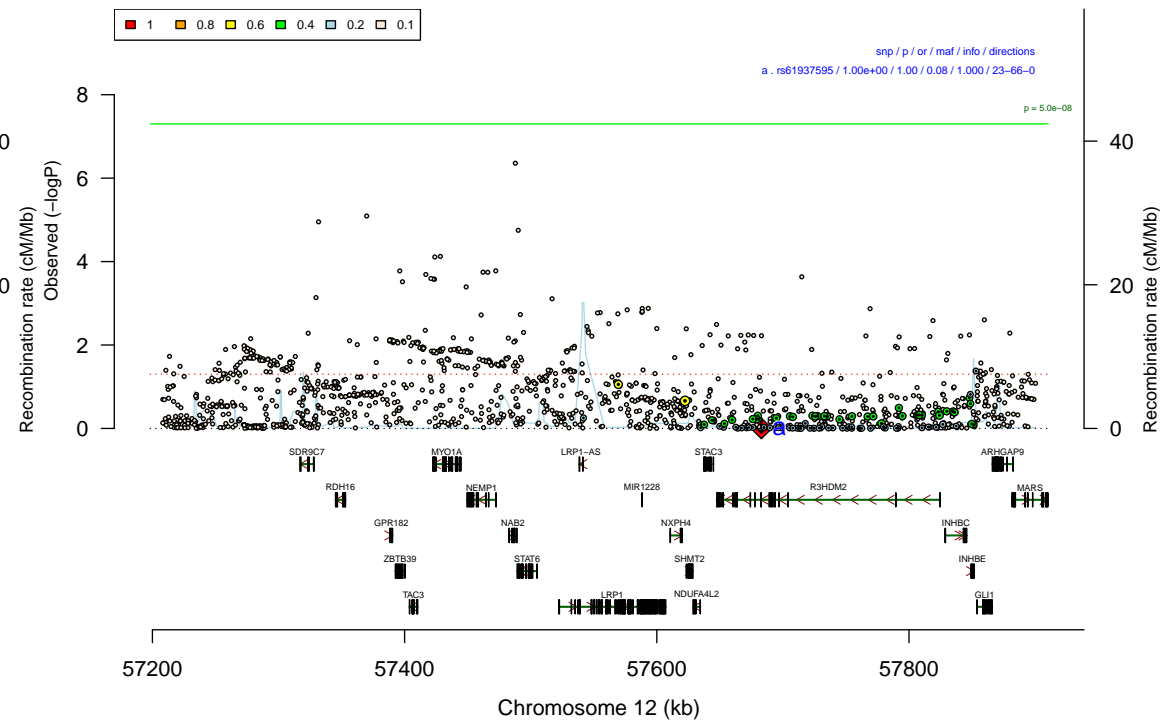

SCZ\_cond\_rs61937595-rs324017-chr12

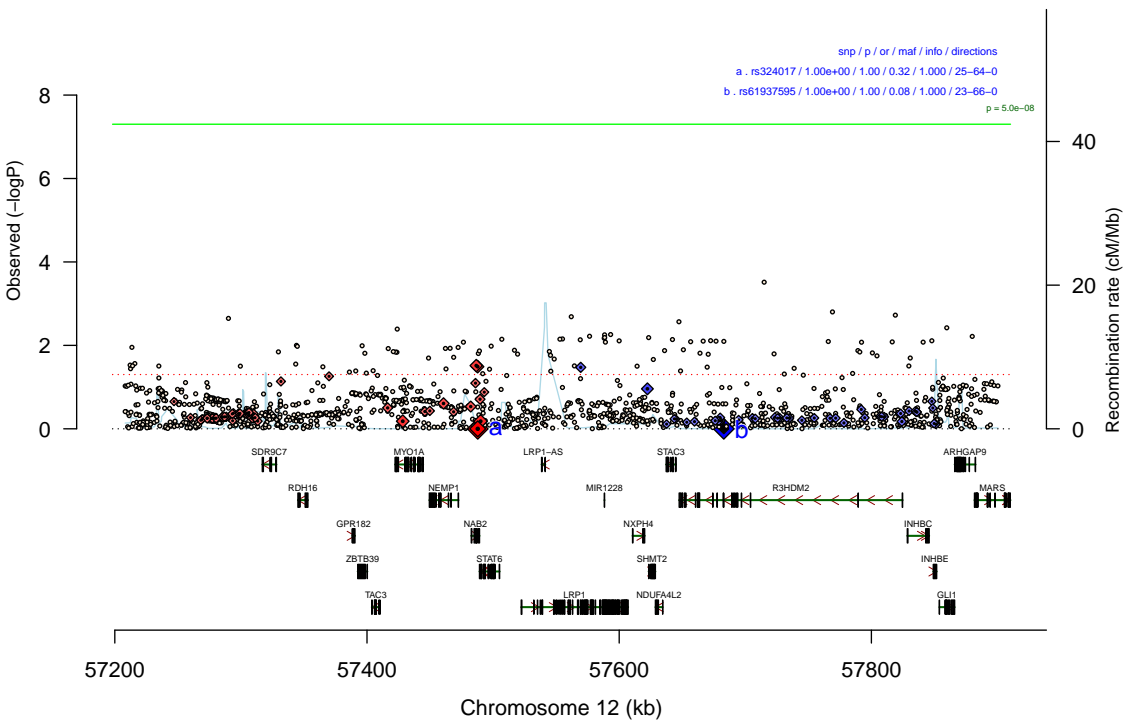

SCZ\_uncond-rs2304205-chr19

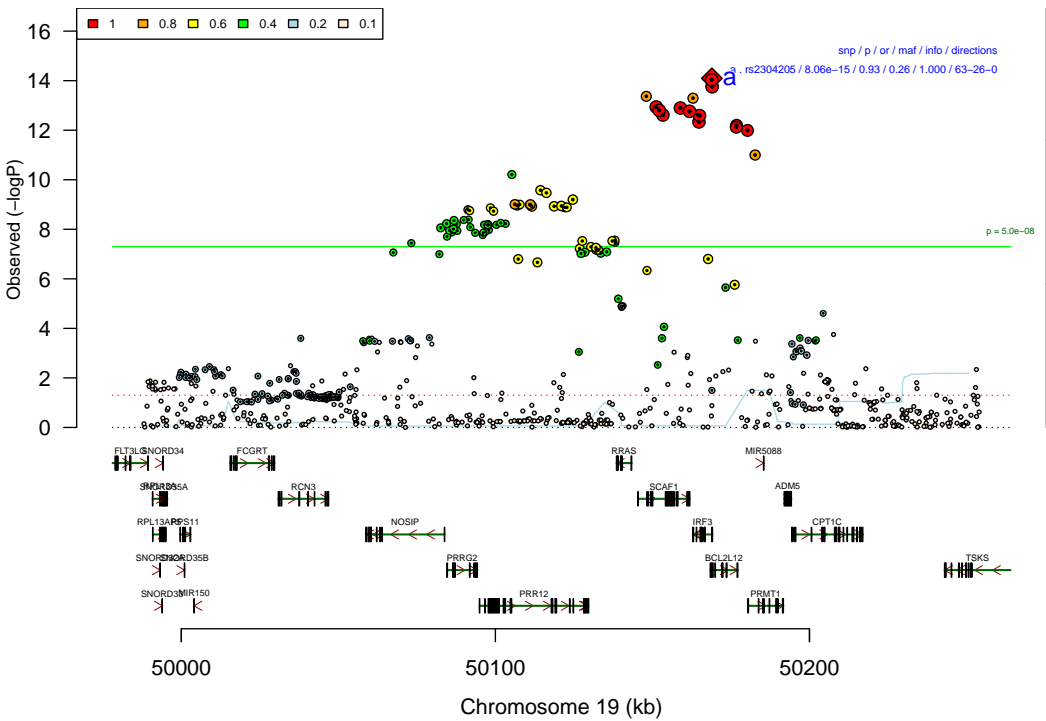

SCZ\_cond-rs2304205-chr19

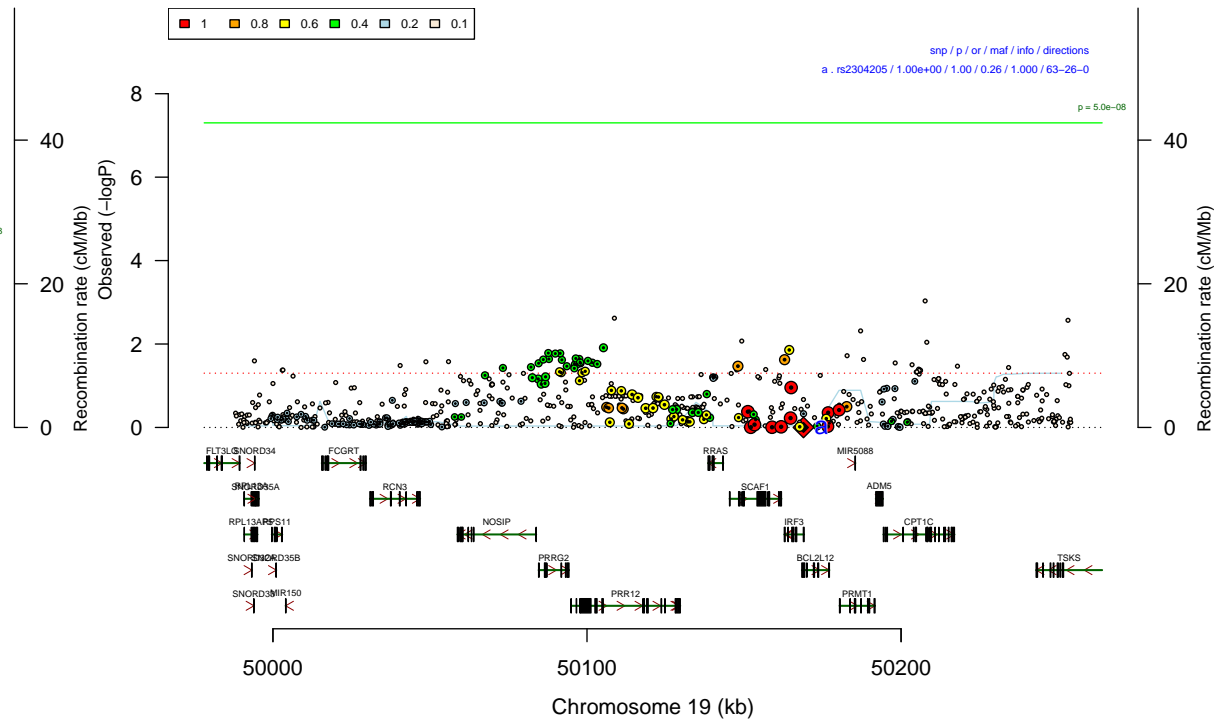

SCZ\_uncond-rs4936215-chr11

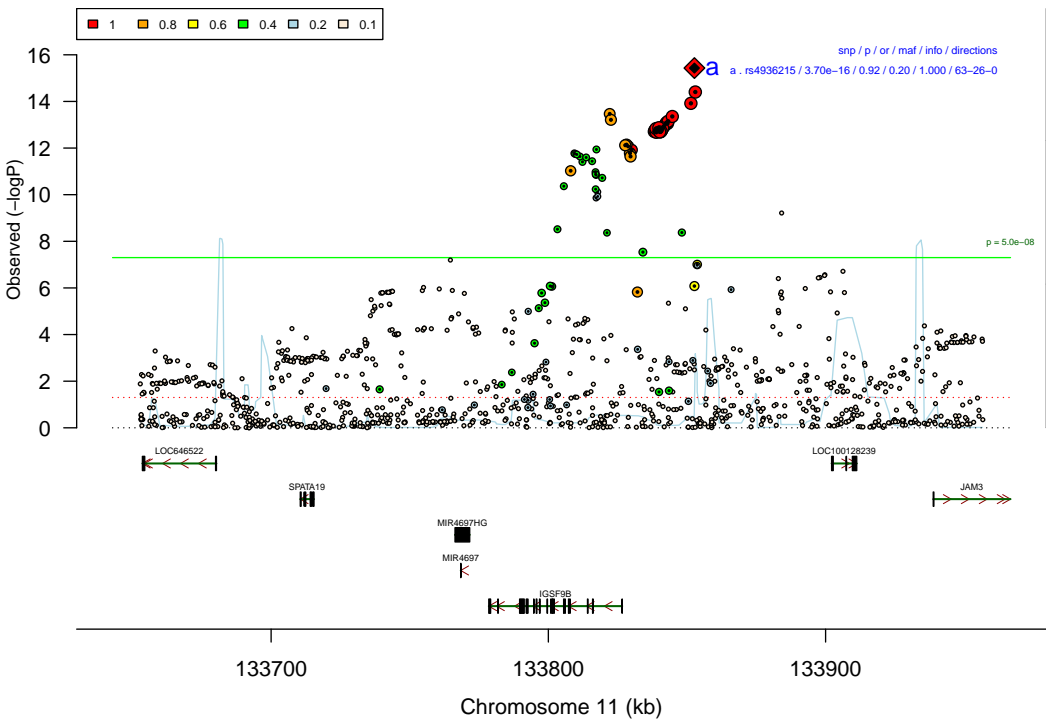

SCZ\_cond-rs4936215-chr11

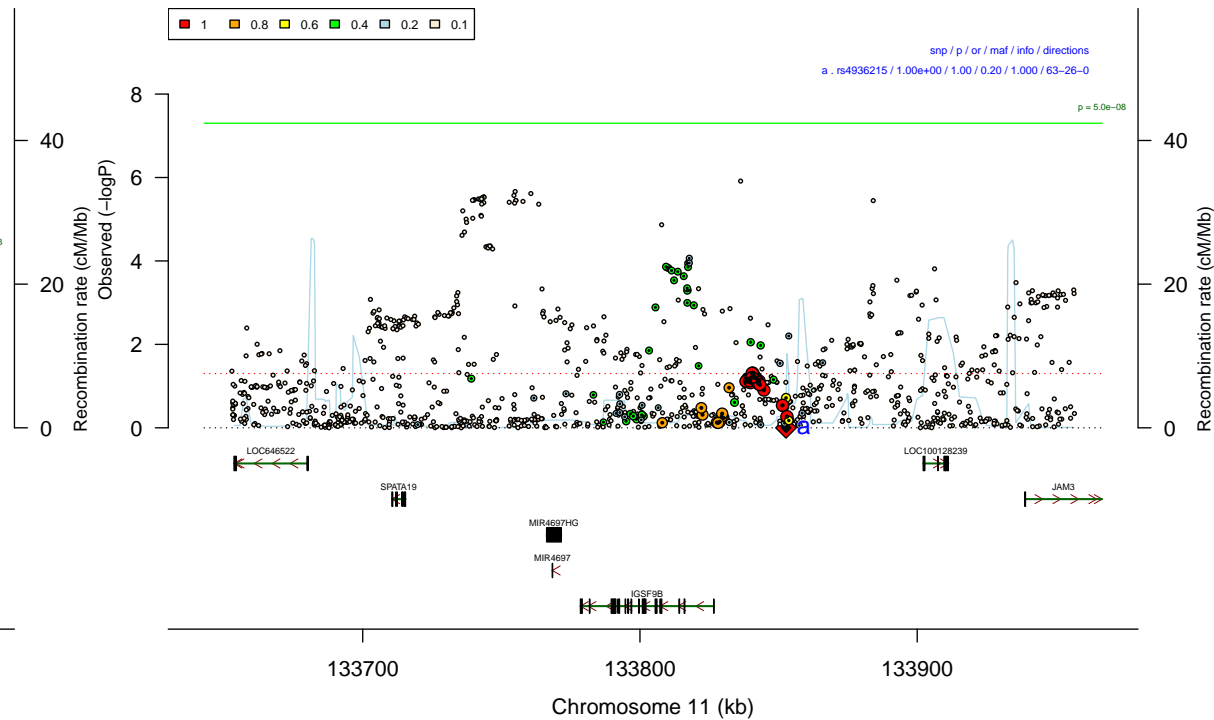

SCZ\_uncond-rs56335113-chr1

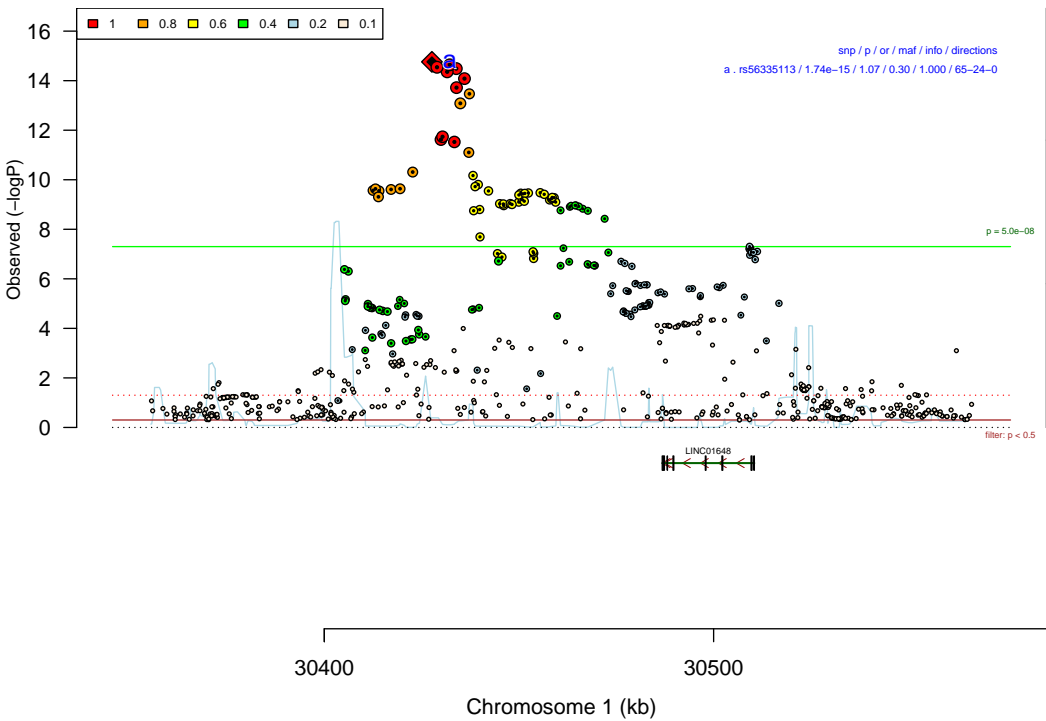

SCZ\_cond-rs56335113-chr1

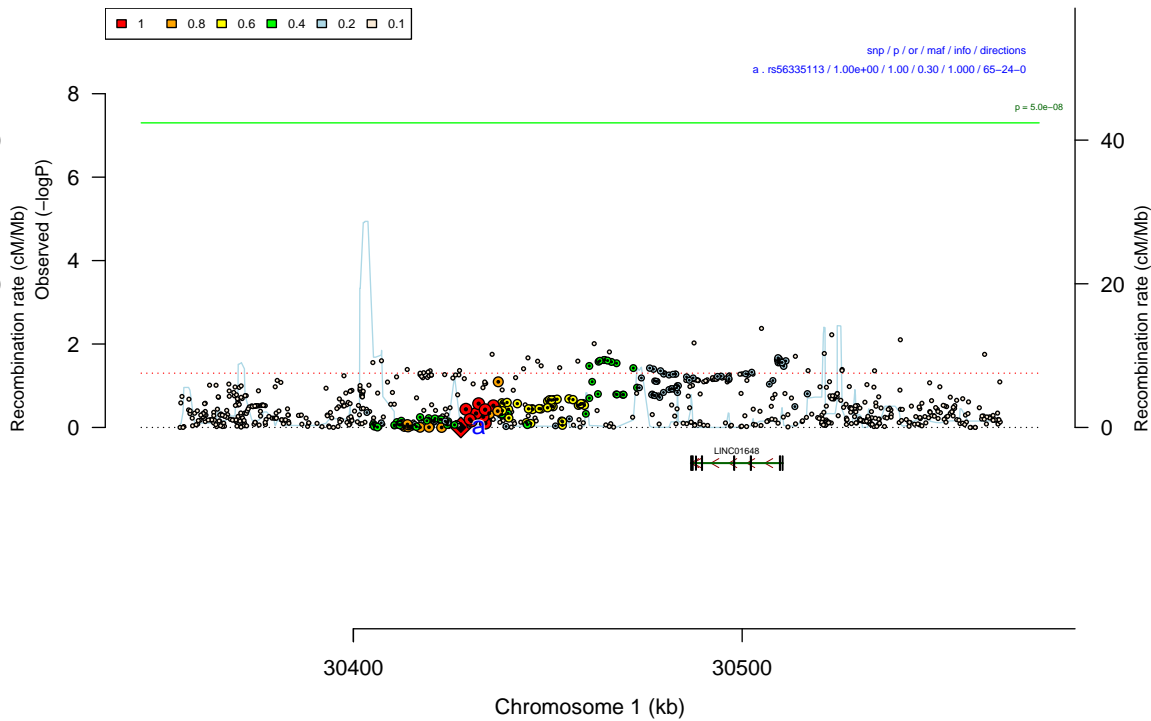



SCZ\_uncond-rs12991836-chr2

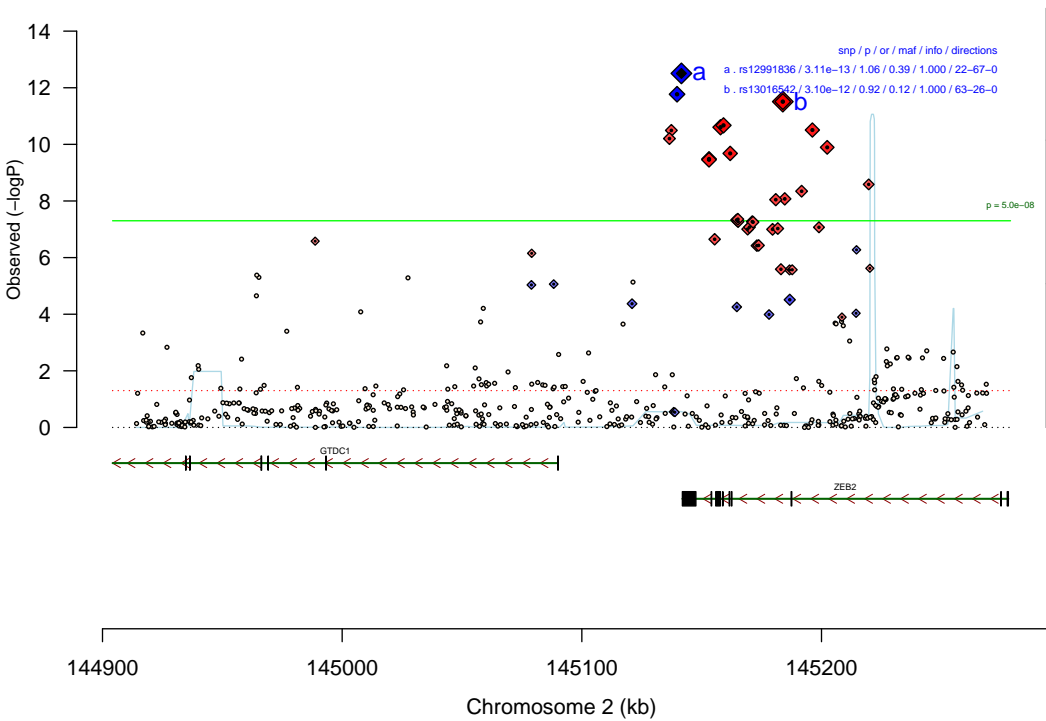

SCZ\_cond\_rs12991836-chr2

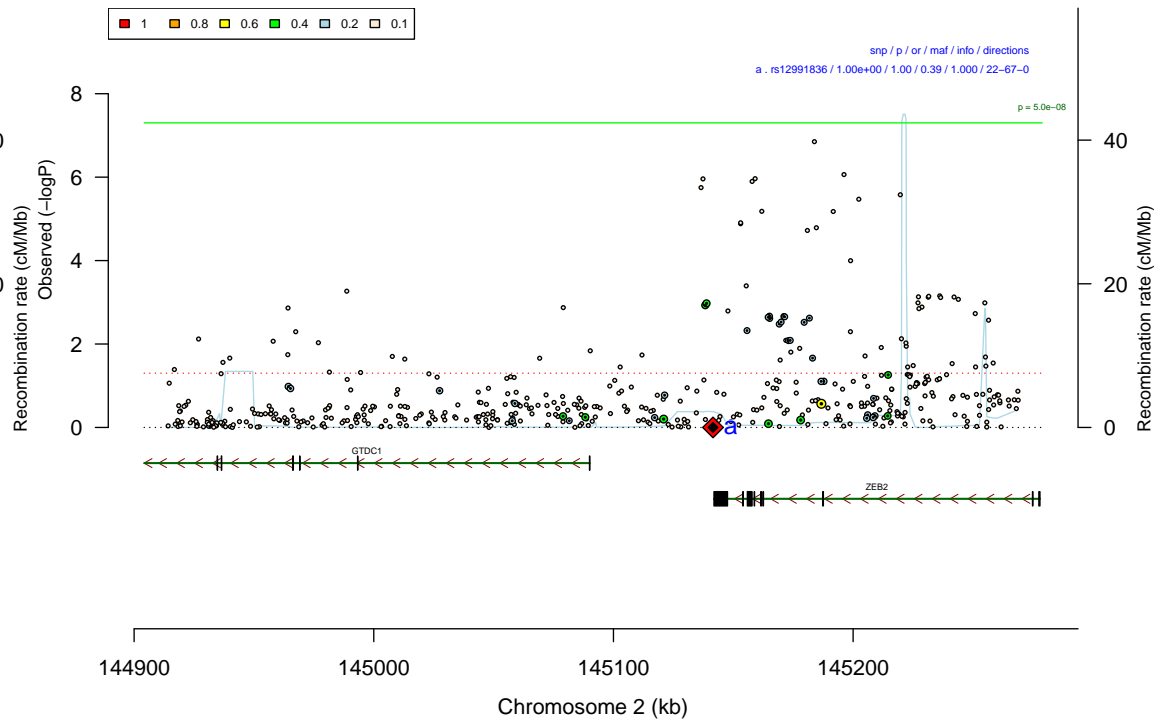

SCZ\_cond\_rs12991836-rs13016542-chr2

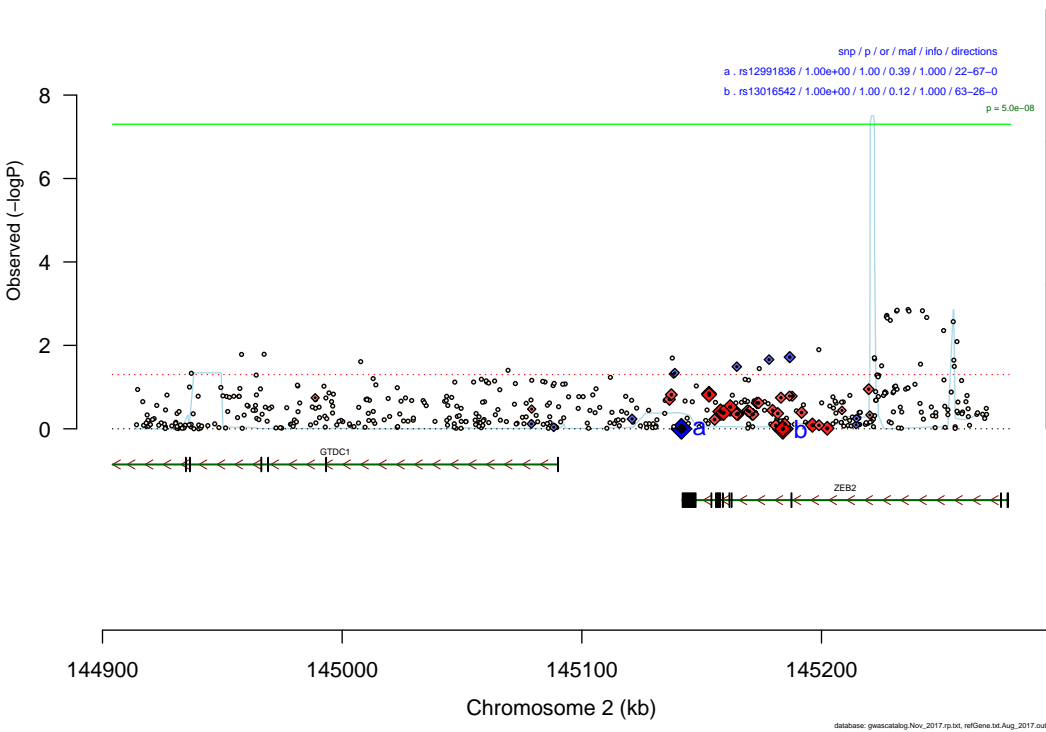

SCZ\_uncond-rs41533650-chr4

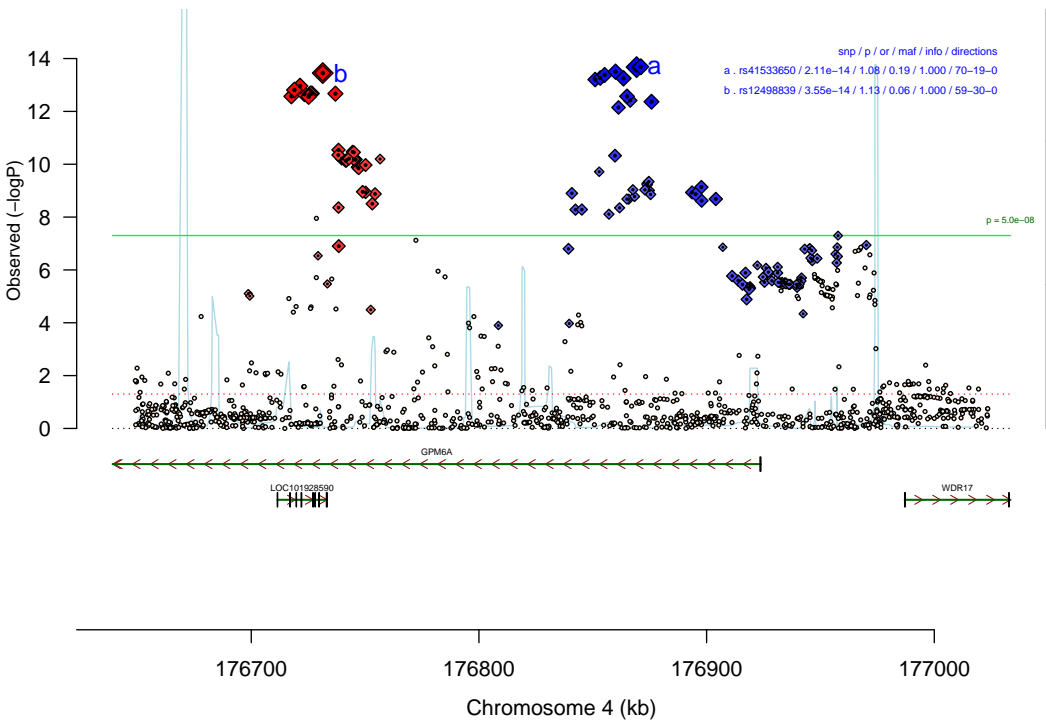

SCZ\_cond\_rs41533650-chr4

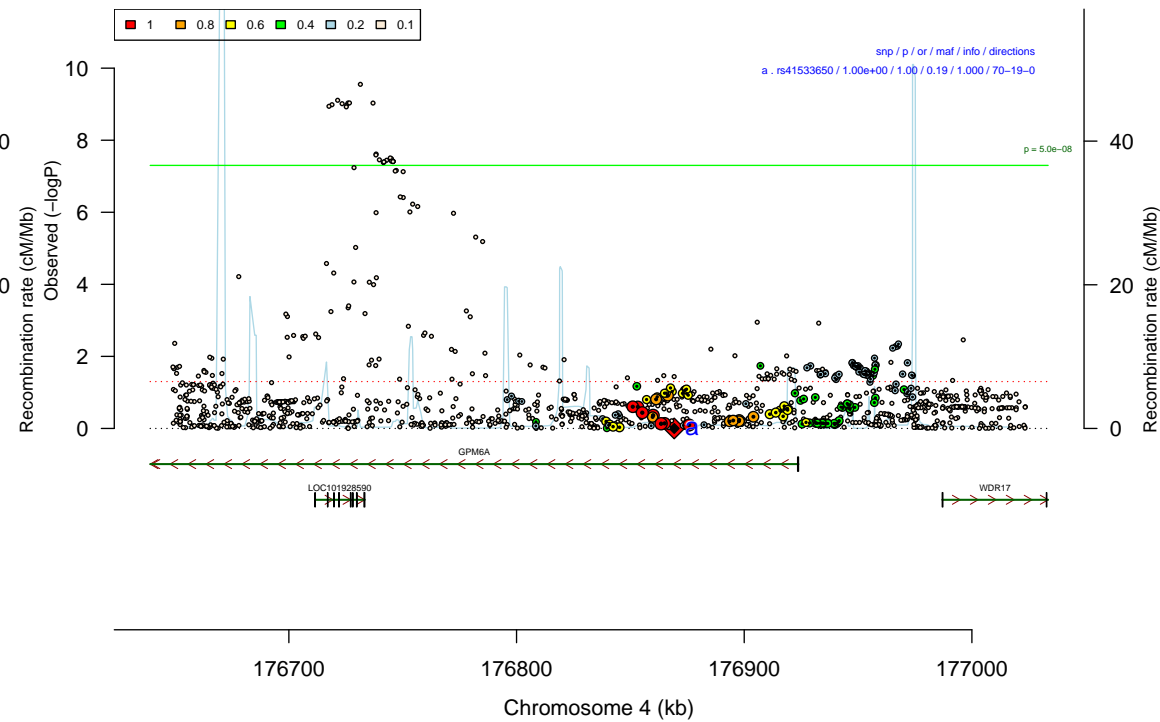

SCZ\_cond\_rs41533650-rs12498839-chr4

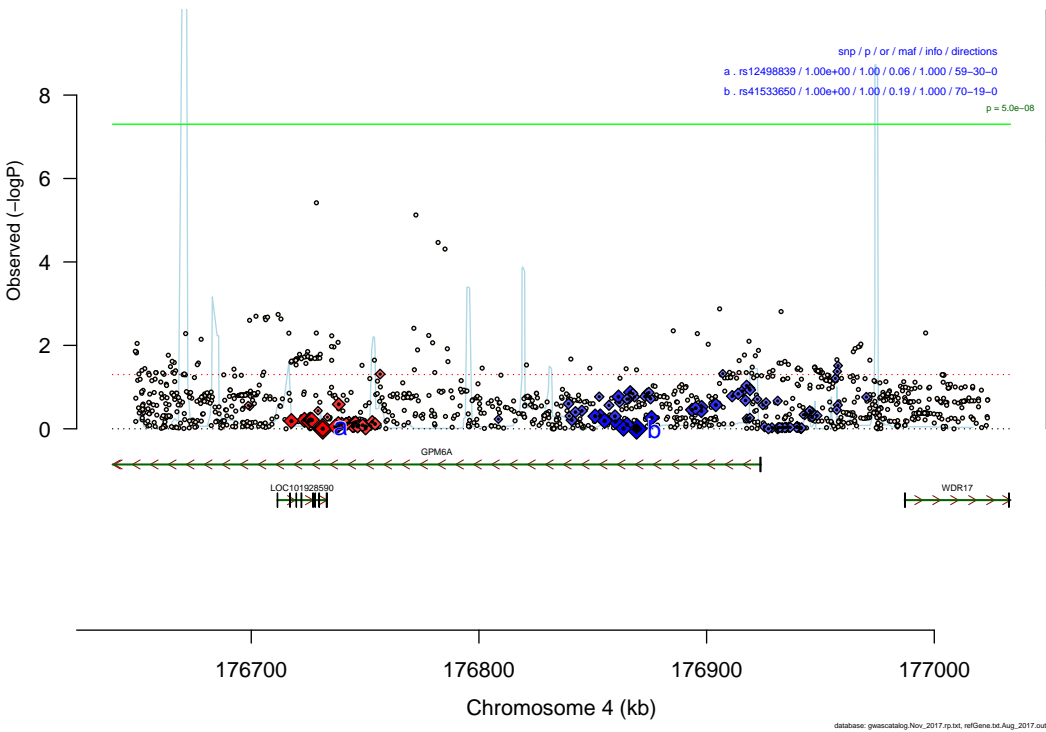

SCZ\_uncond-rs11638554-chr15

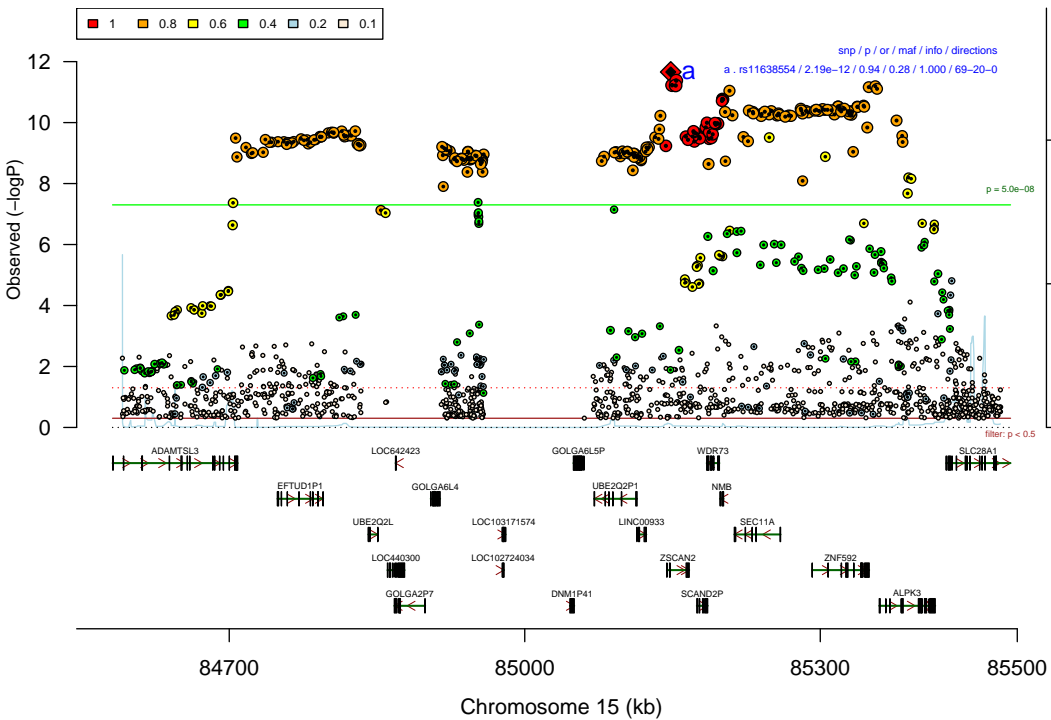

SCZ\_cond-rs11638554-chr15

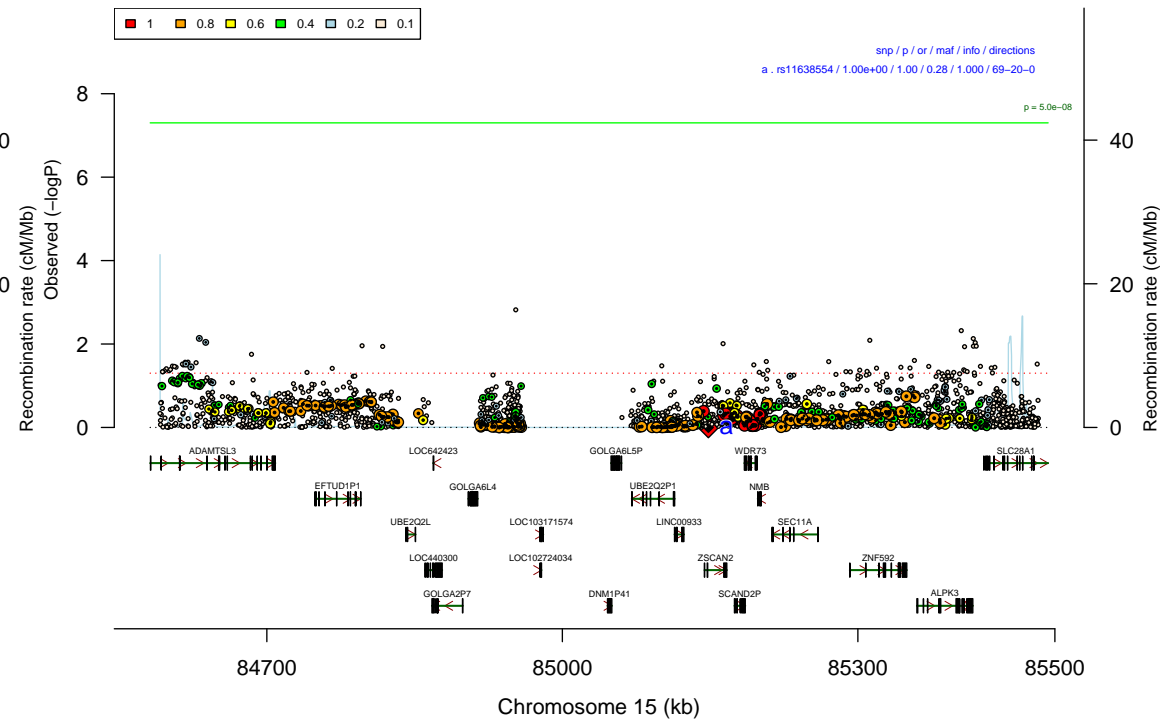

SCZ\_uncond-rs11693094-chr2

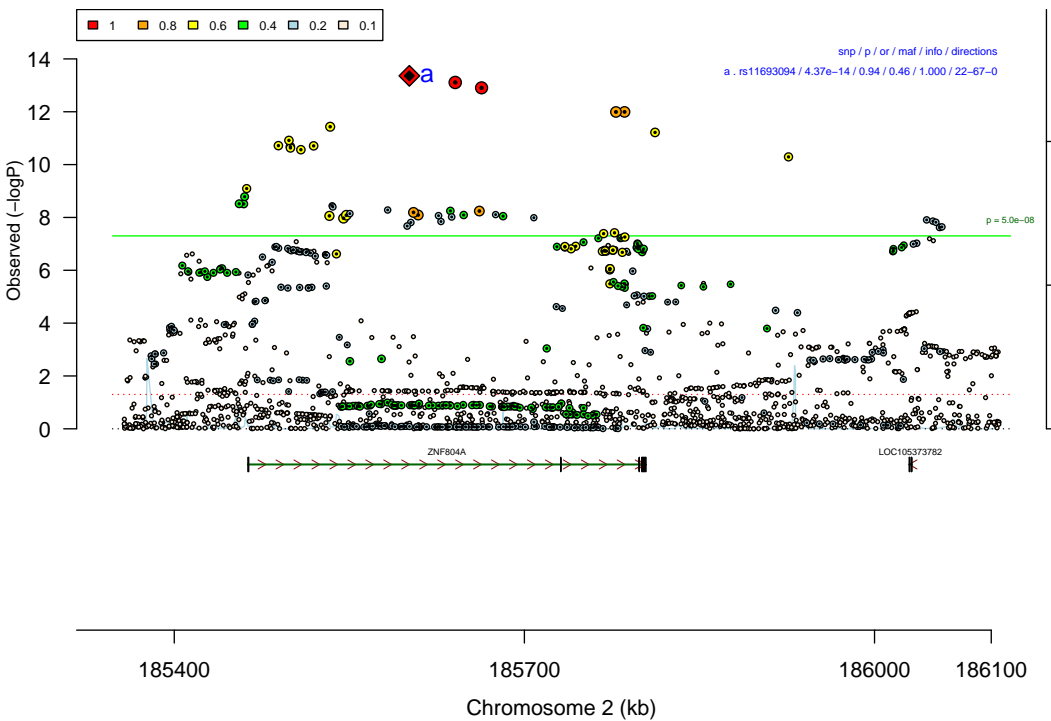

SCZ\_cond-rs11693094-chr2

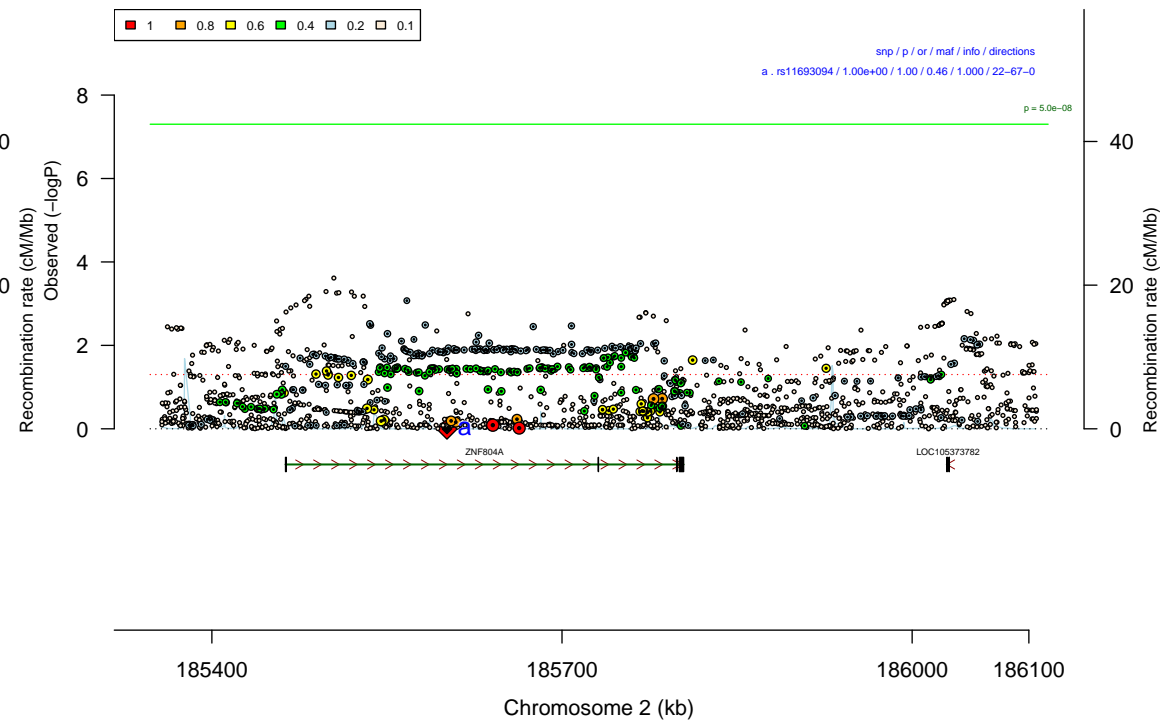

SCZ\_uncond-rs2252074-chr7

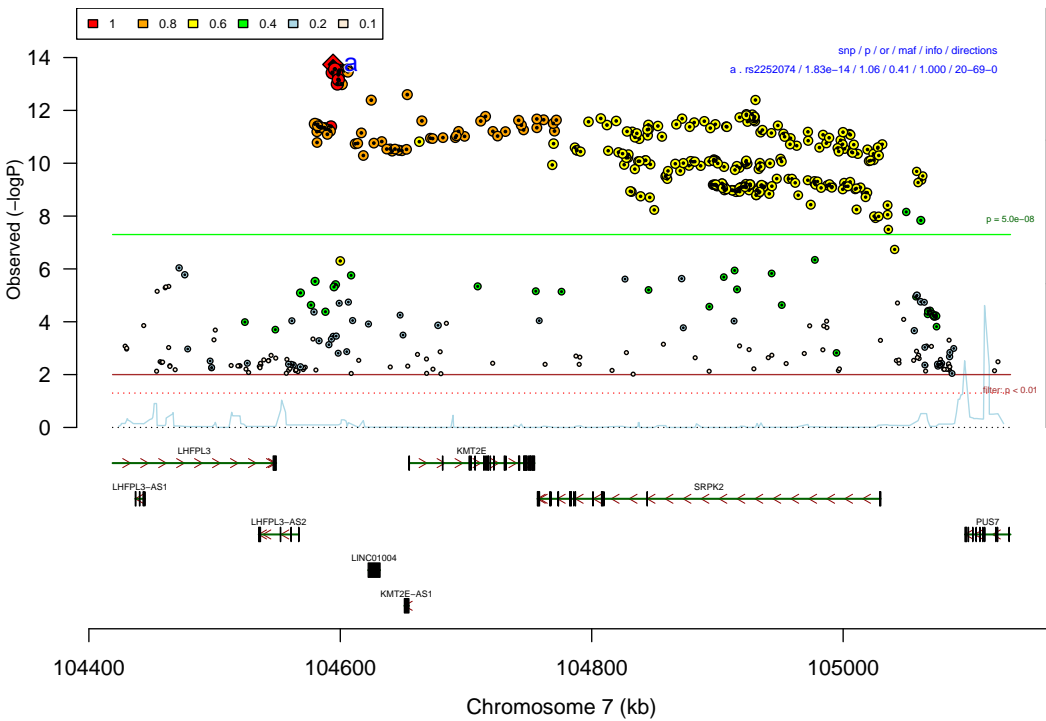

SCZ\_cond-rs2252074-chr7

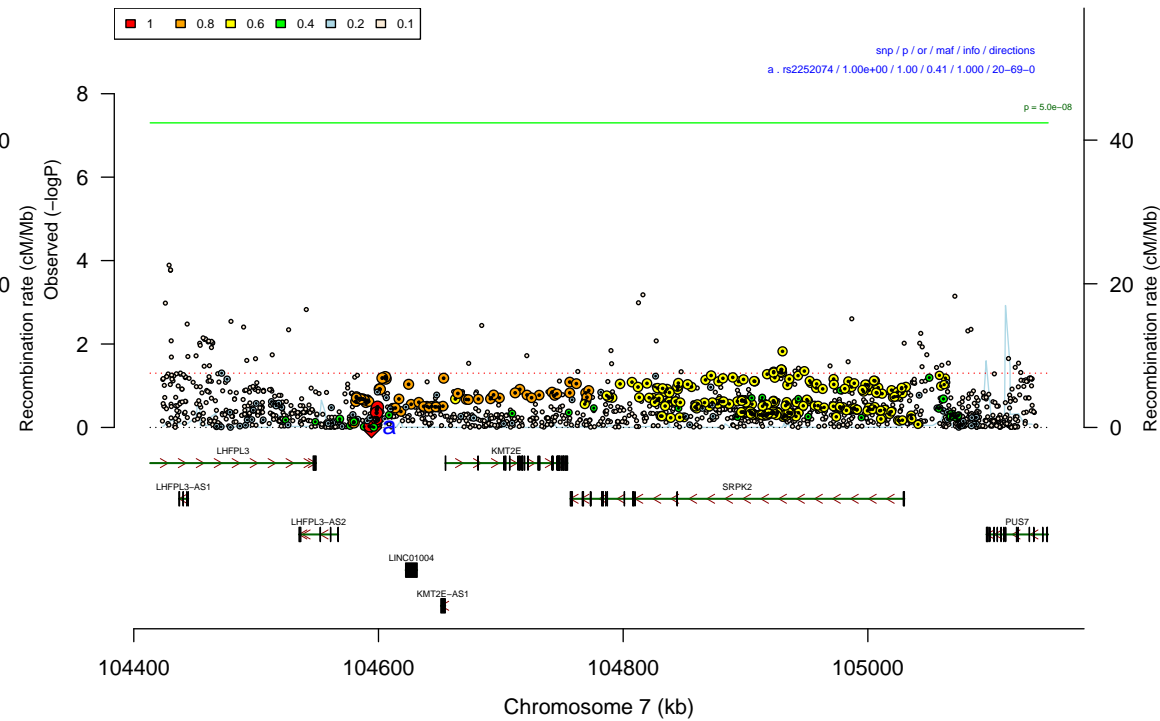

SCZ\_uncond-rs11587347-chr1

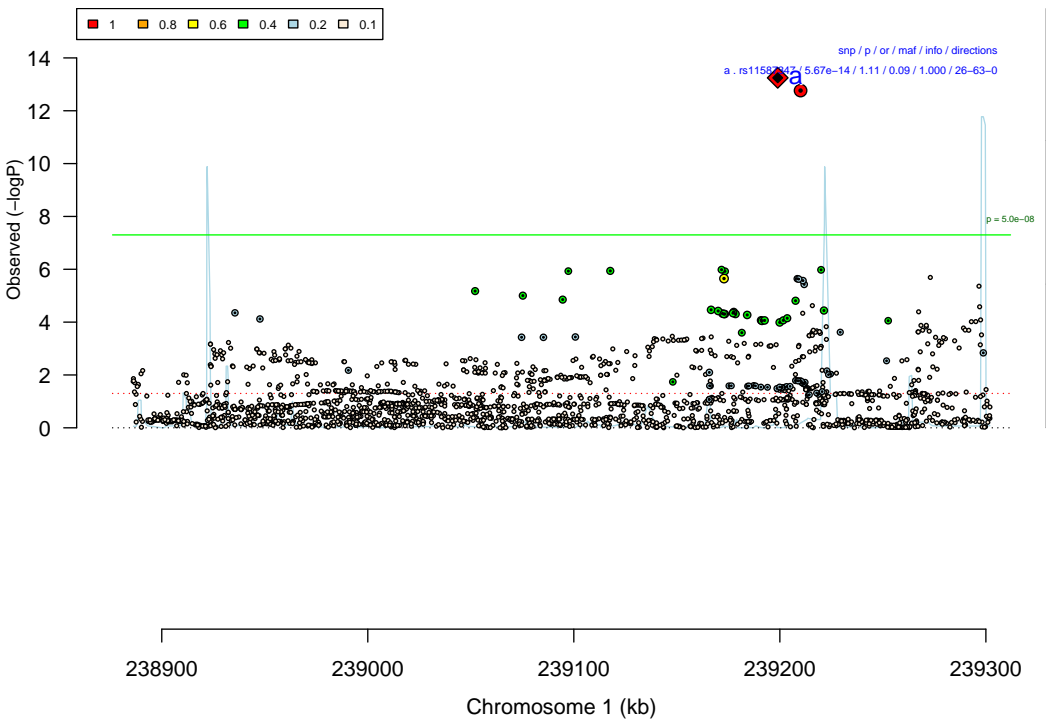

SCZ\_cond-rs11587347-chr1

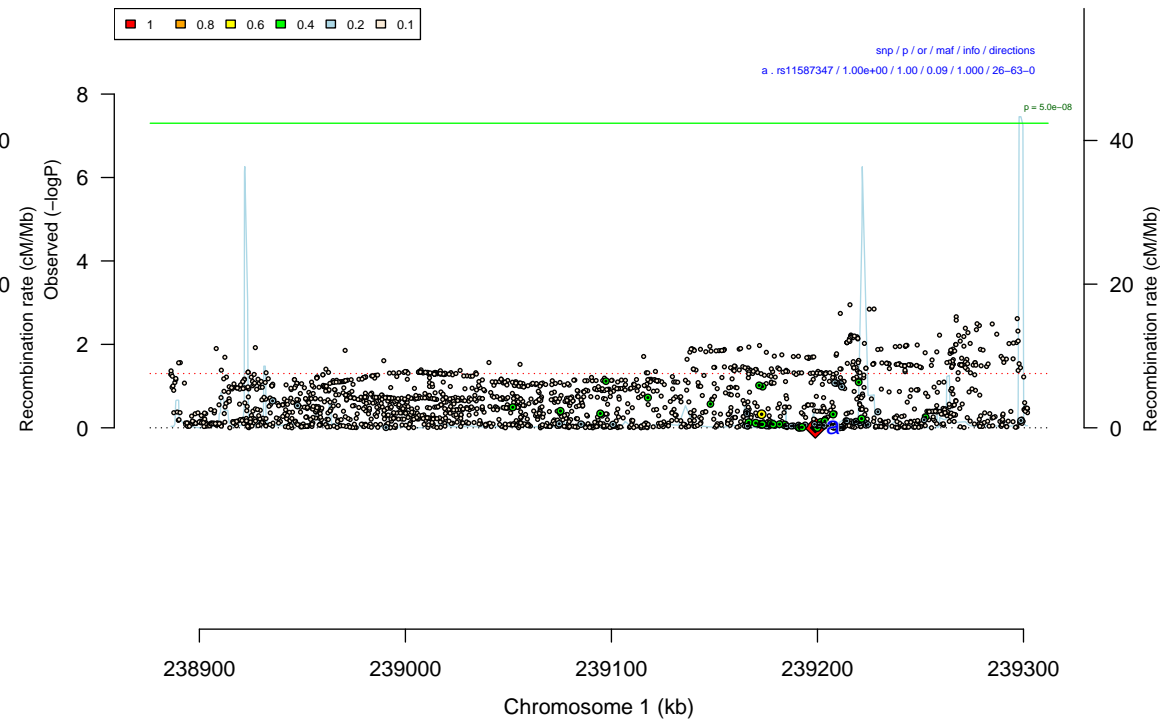

SCZ\_uncond-rs10873538-chr14

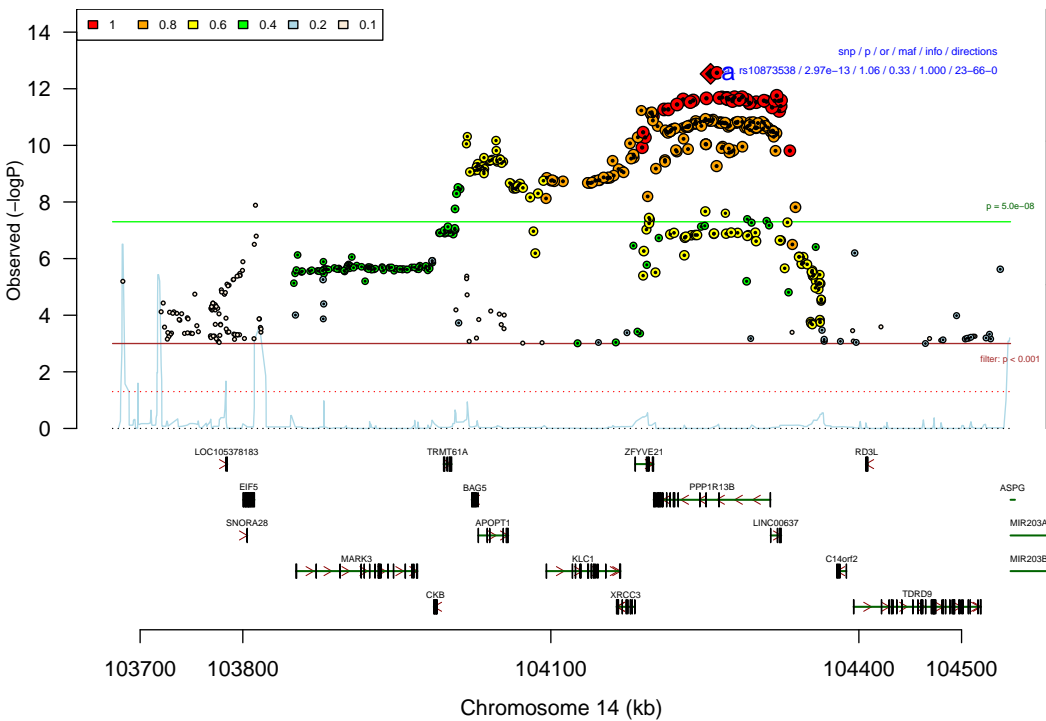

SCZ\_cond-rs10873538-chr14

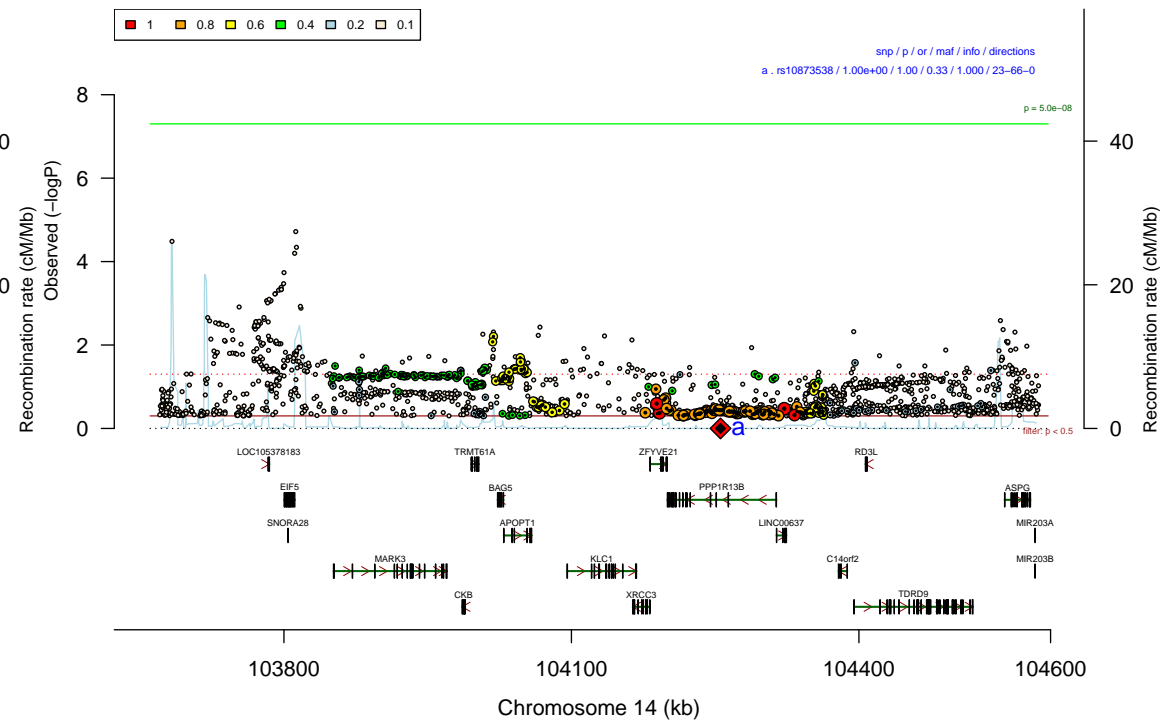

SCZ\_uncond-rs7432375-chr3

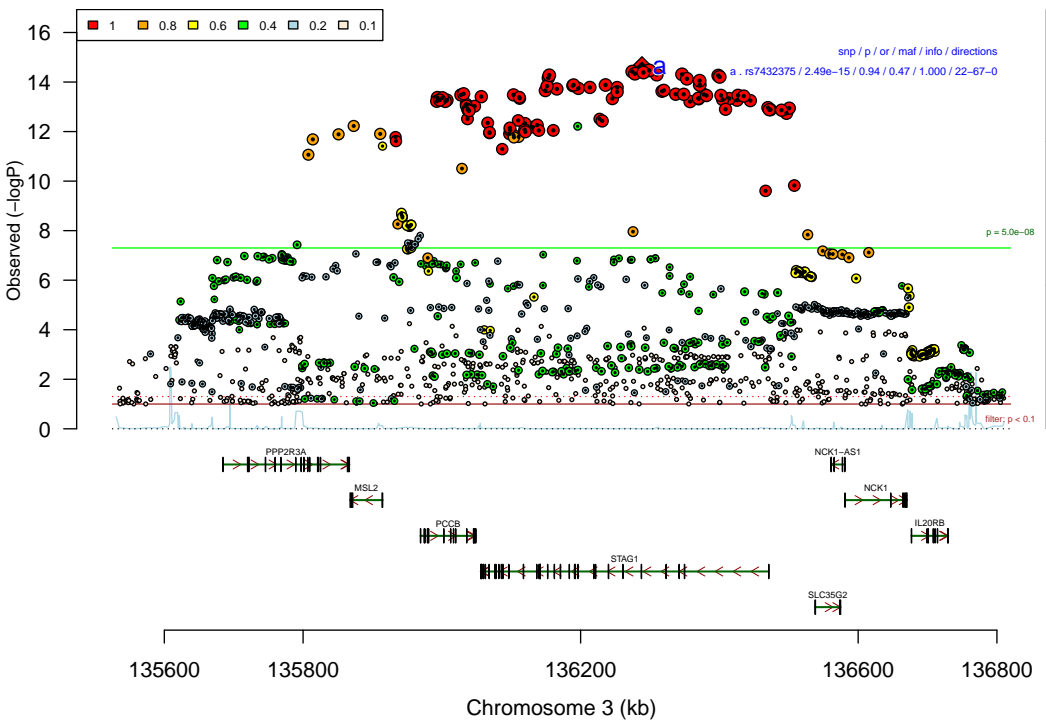

SCZ\_cond-rs7432375-chr3

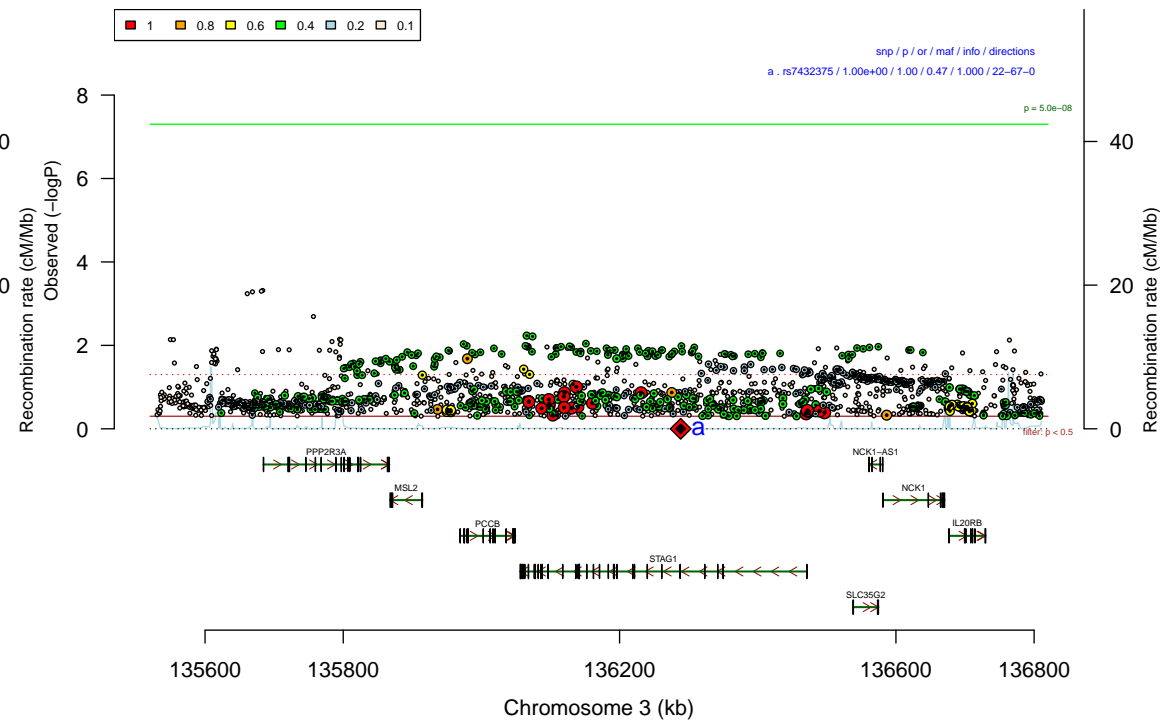

SCZ\_uncond-rs2914983-chr2

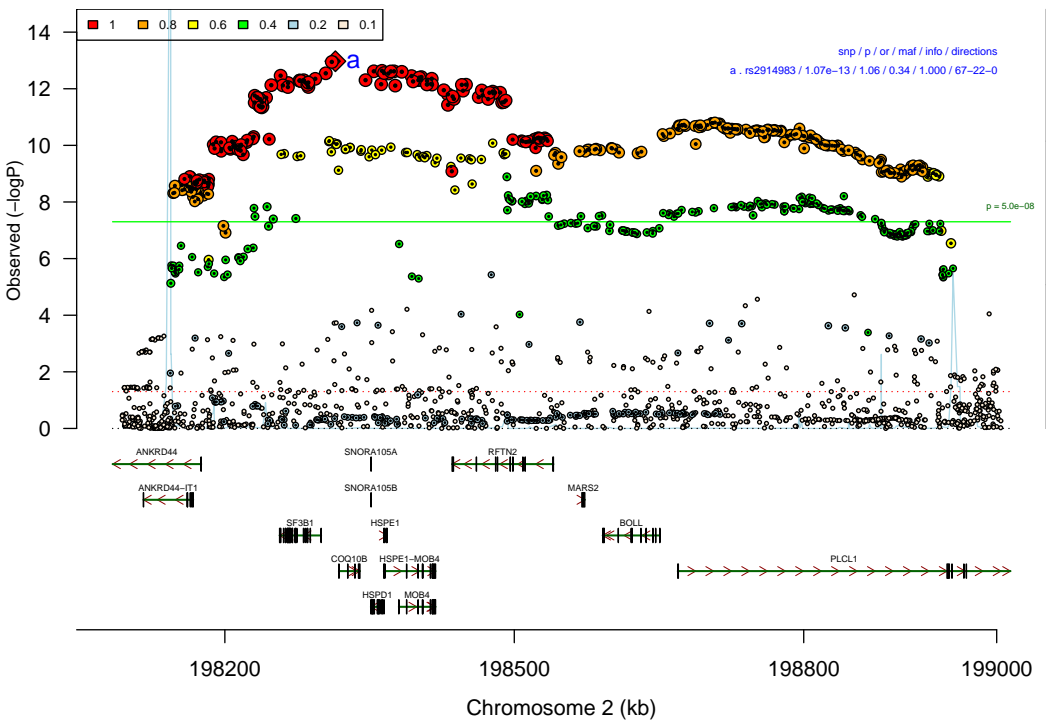

SCZ\_cond-rs2914983-chr2

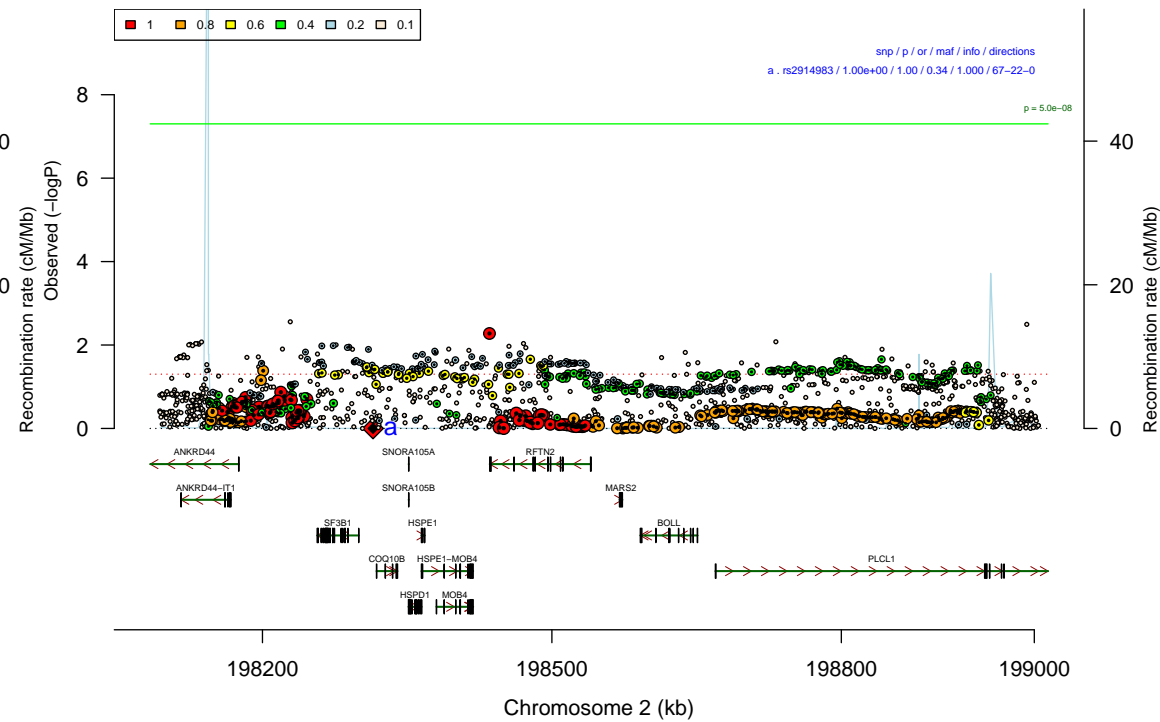

SCZ\_uncond-rs38752-chr7

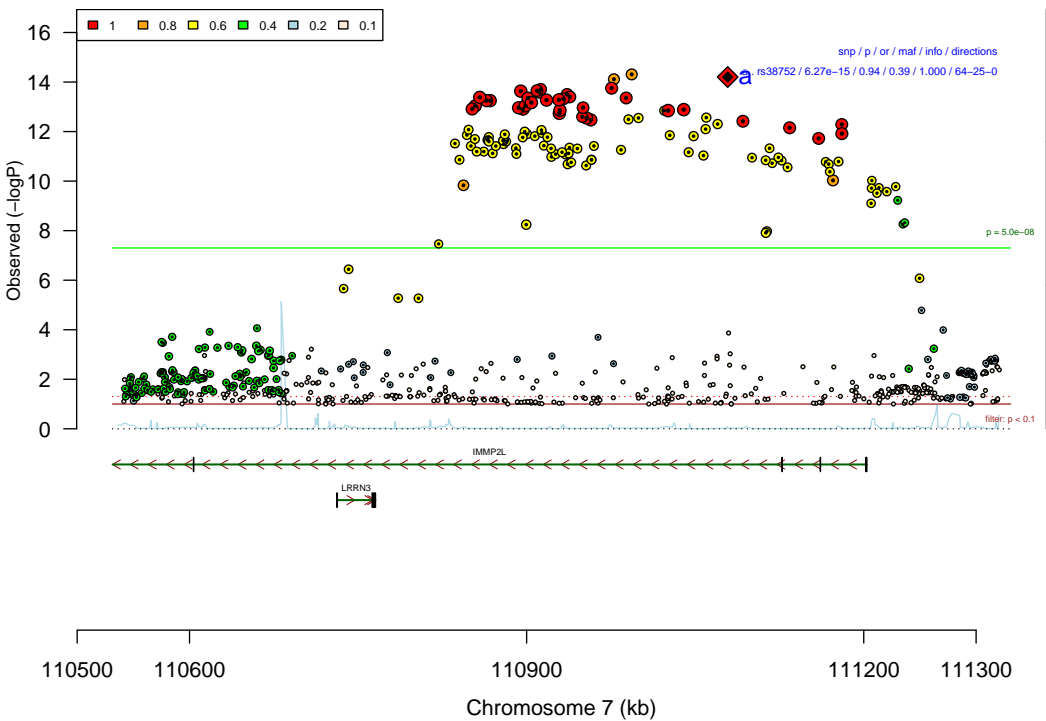

SCZ\_cond-rs38752-chr7

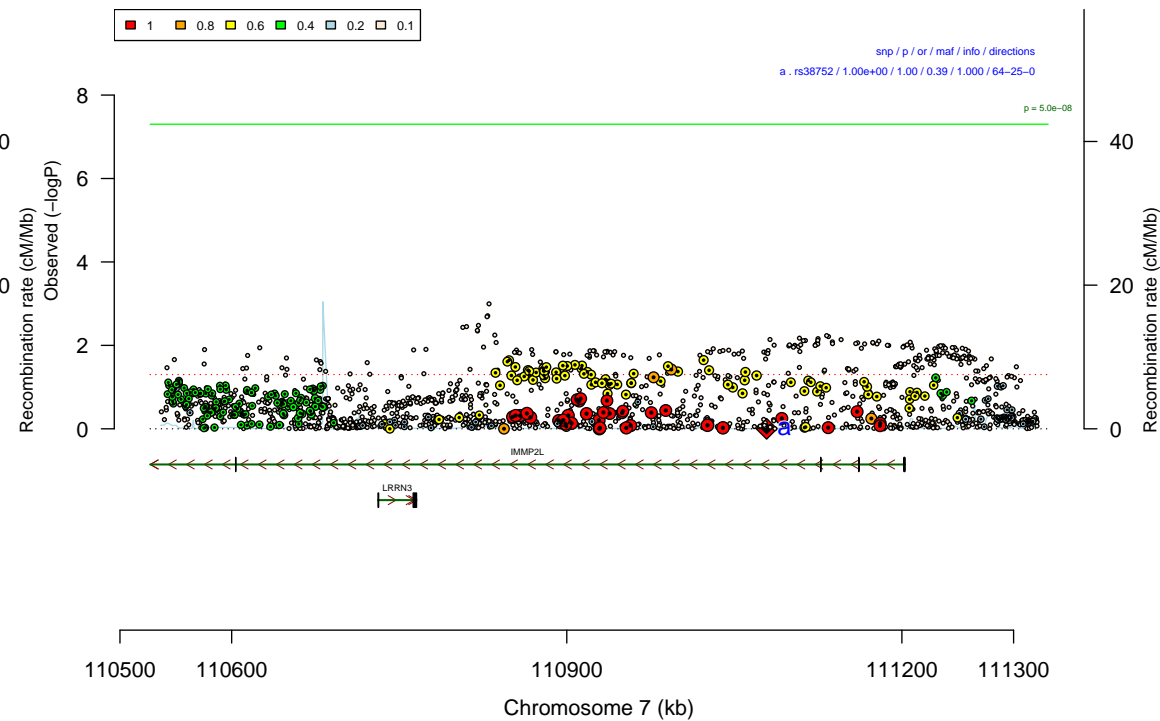

SCZ\_uncond-rs5751191-chr22

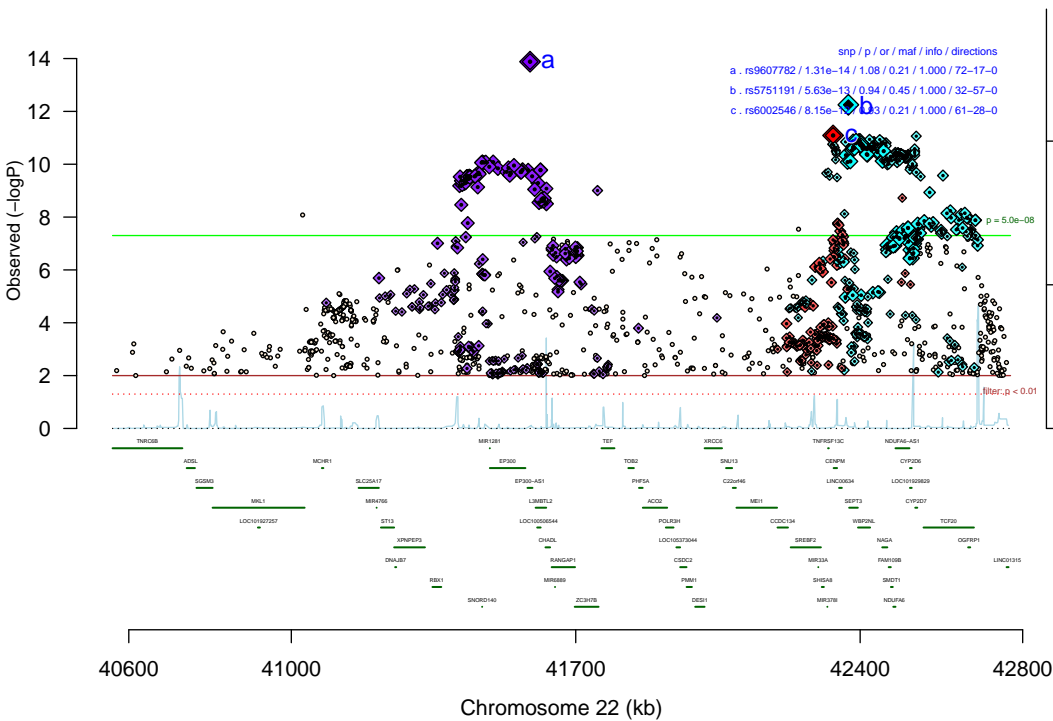

SCZ\_cond\_rs5751191-chr22

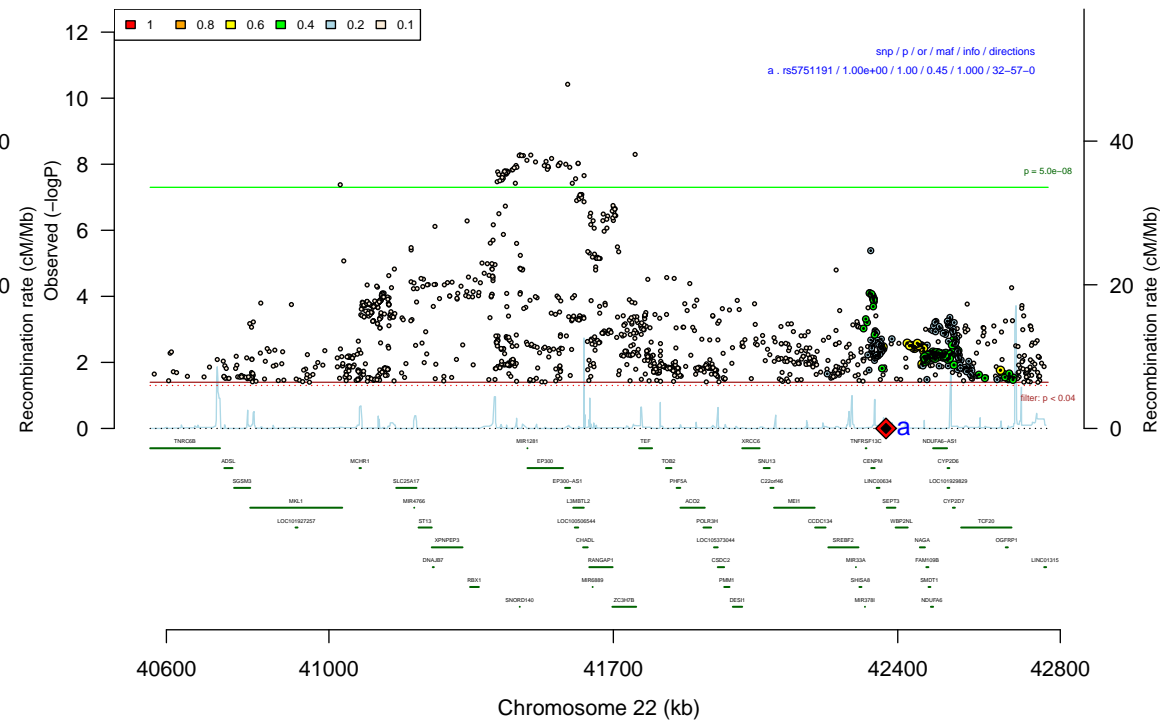

SCZ\_rs5751191-rs9607782-chr22

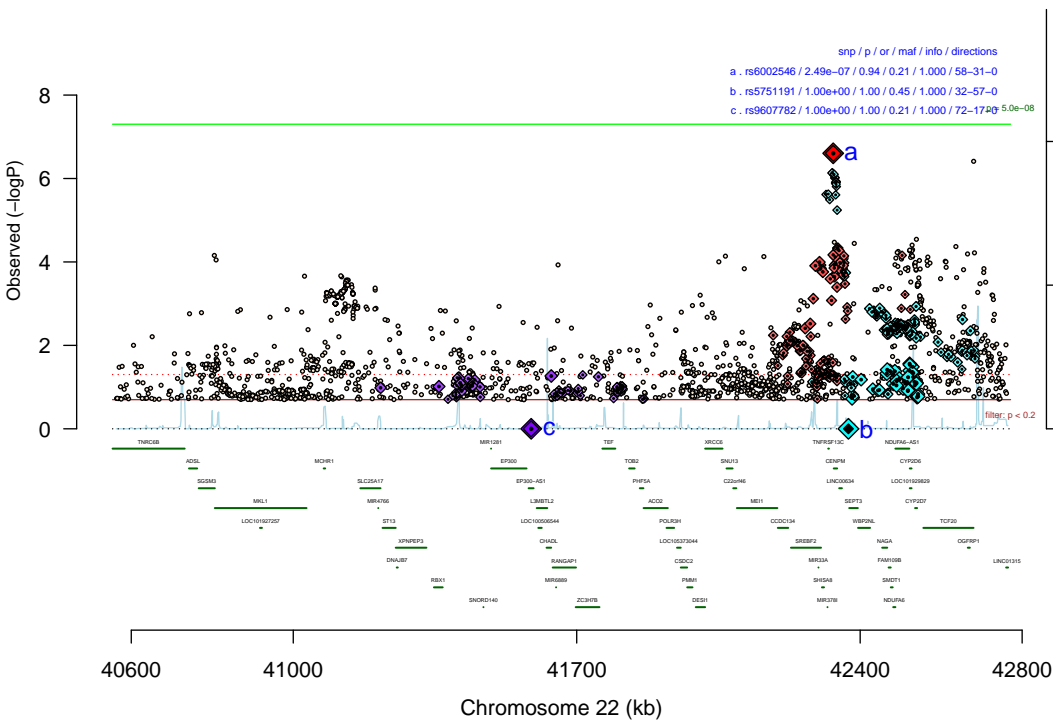

SCZ\_rs5751191-rs9607782-rs6002546-chr22

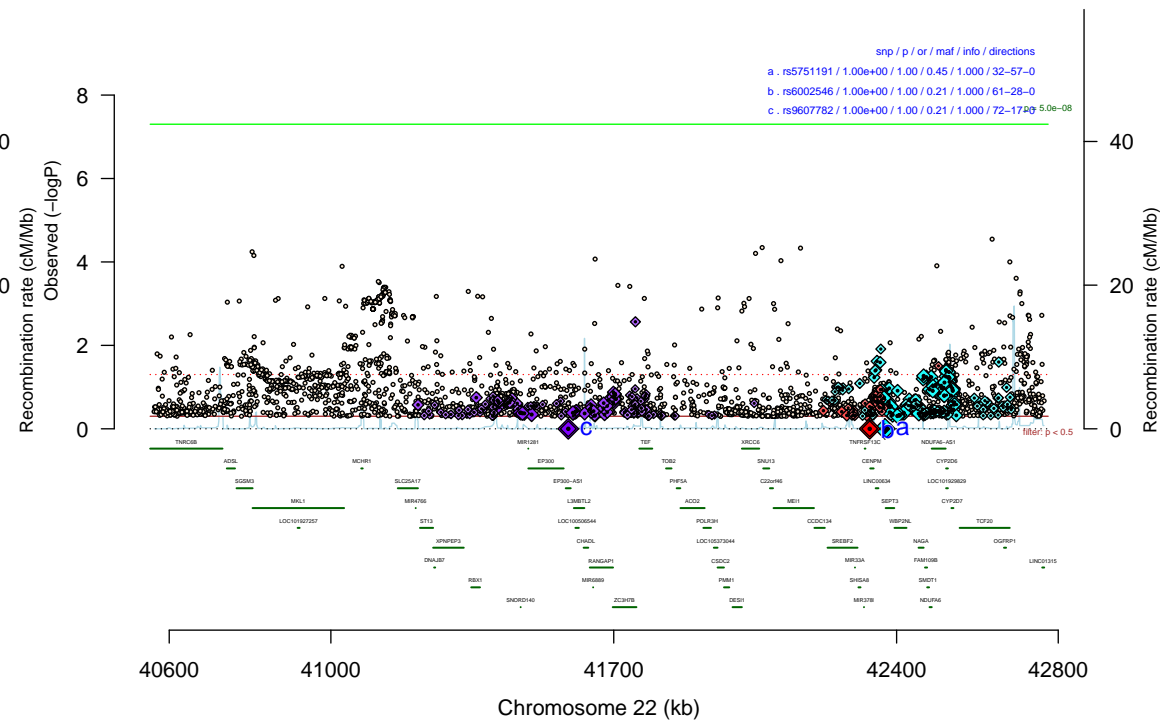



SCZ\_uncond-rs9636107-chr18

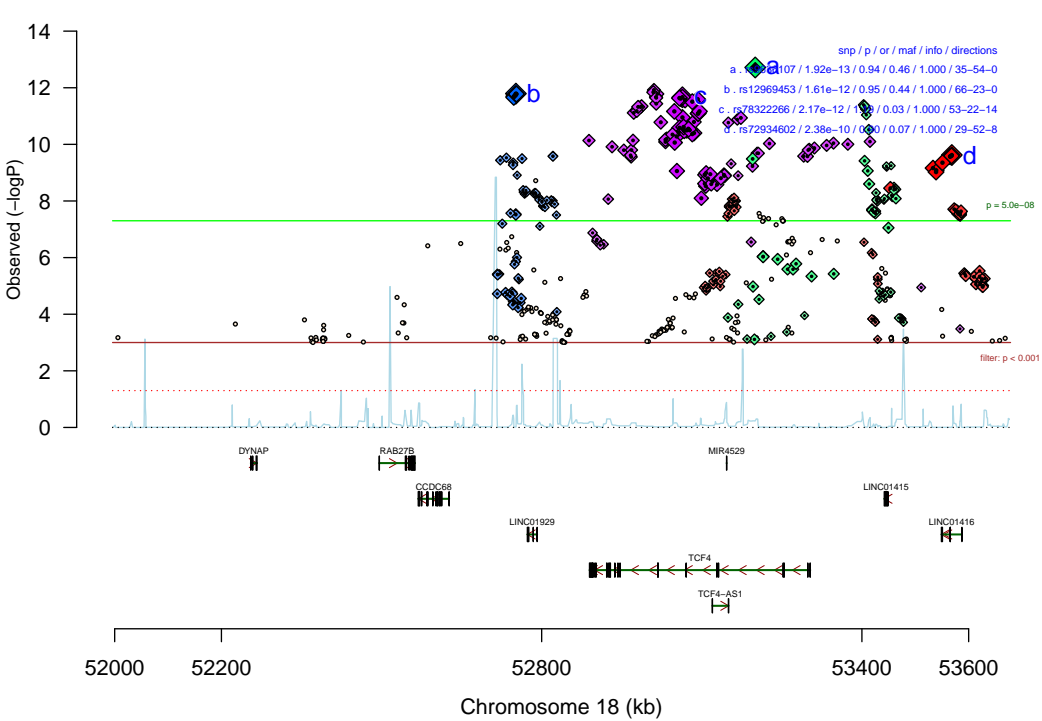

SCZ\_cond\_rs9636107-chr18

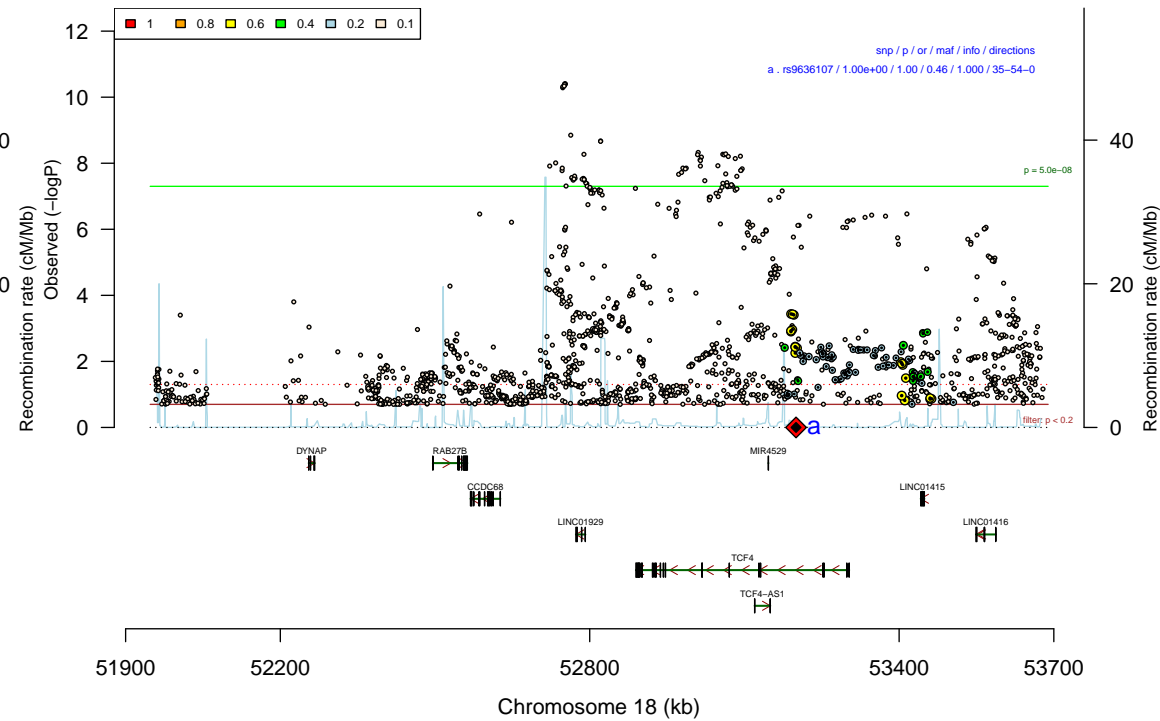

SCZ\_cond\_rs9636107-rs12969453-chr18

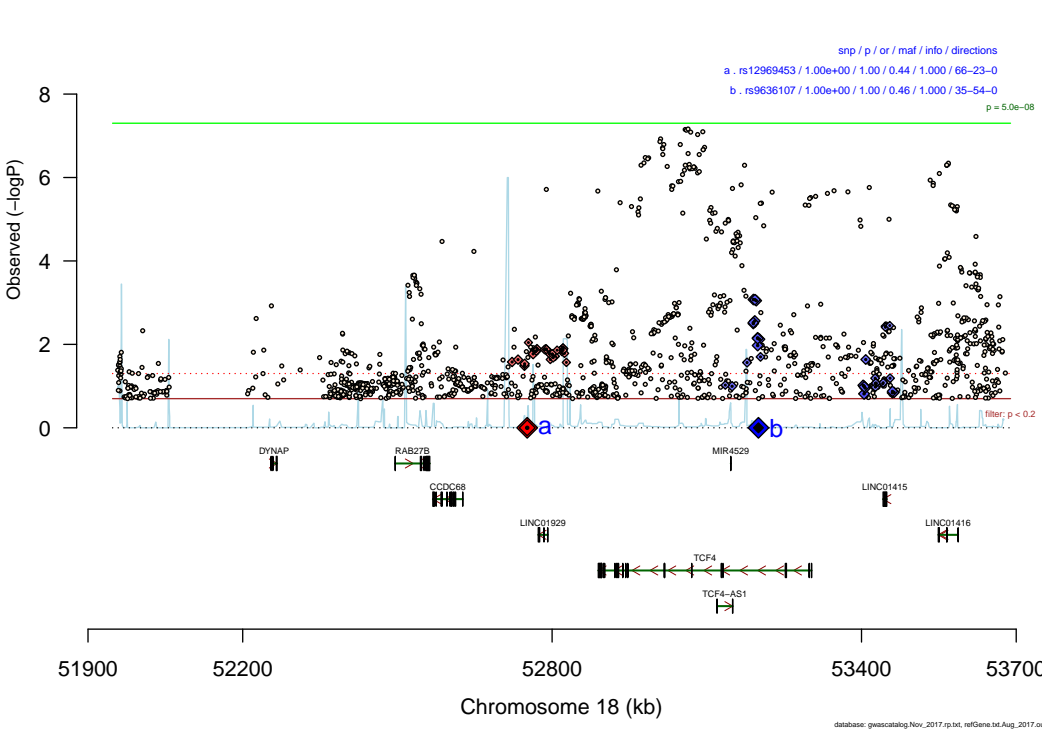

SCZ\_cond\_rs9636107-rs12969453-rs78322266-chr18

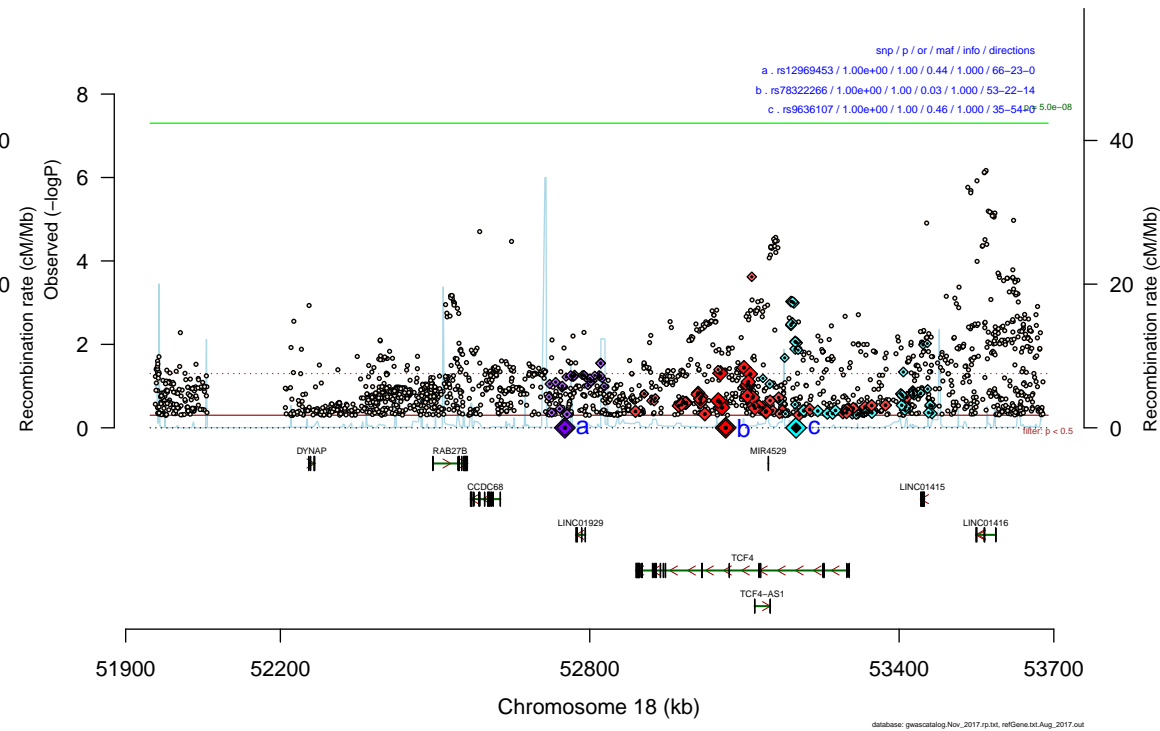

SCZ\_cond-rs9636107-rs12969453-rs78322266-rs72934602-chr18

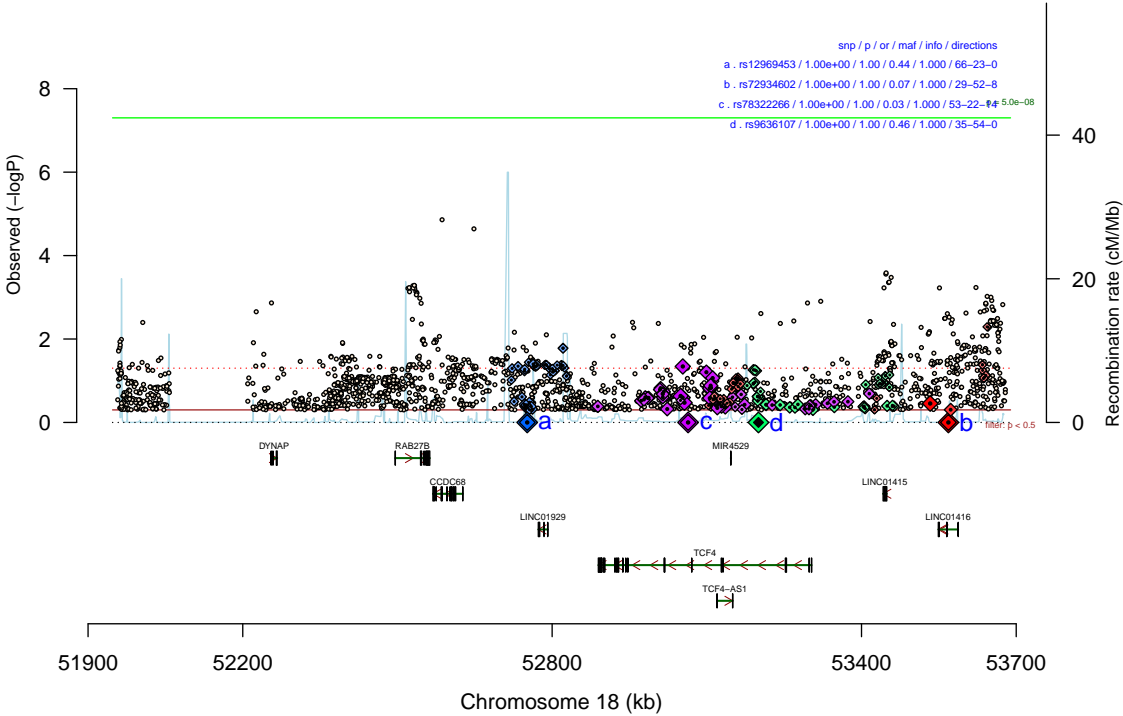

SCZ\_uncond-rs715170-chr18

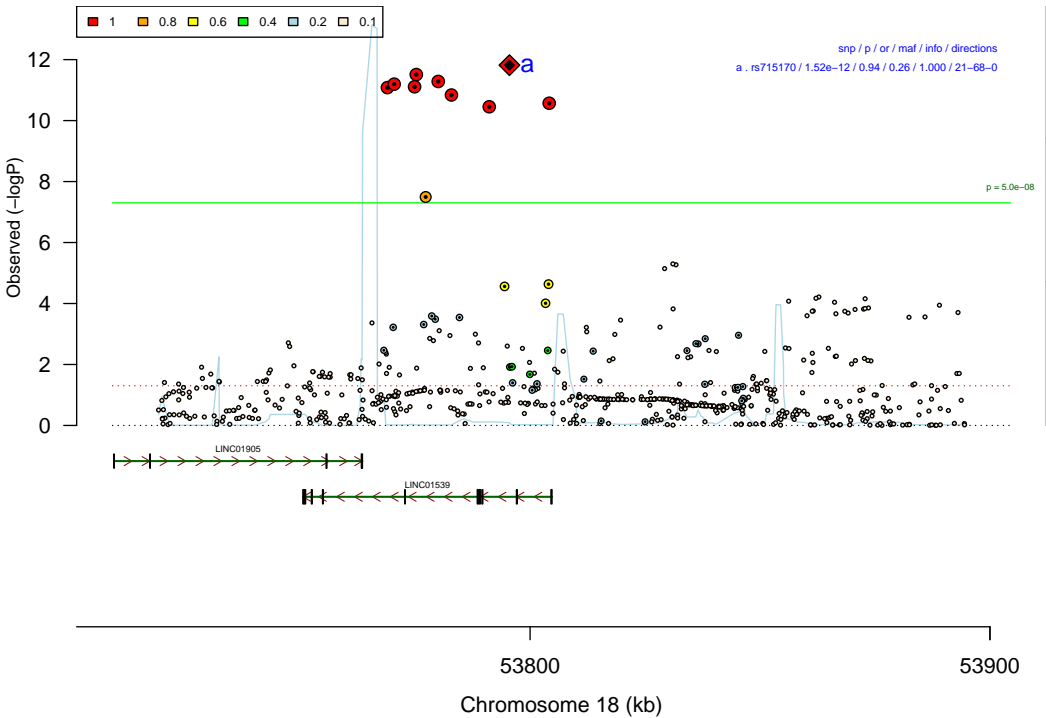

SCZ\_cond-rs715170-chr18

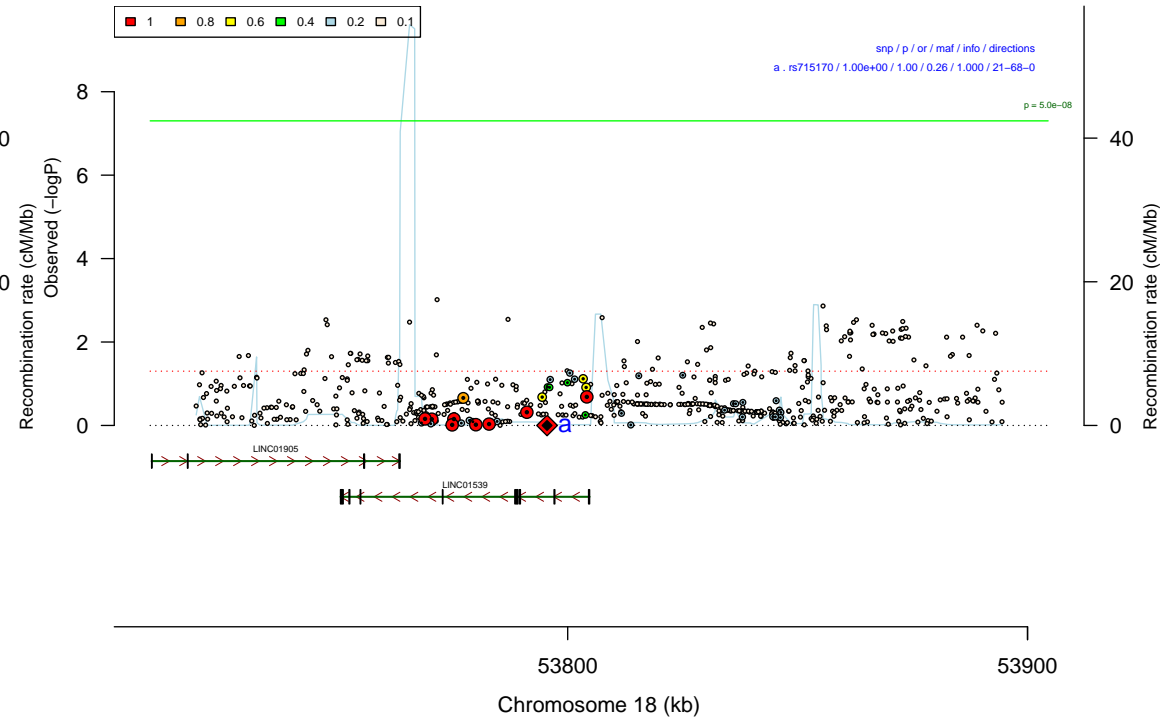

SCZ\_uncond-rs1939514-chr11

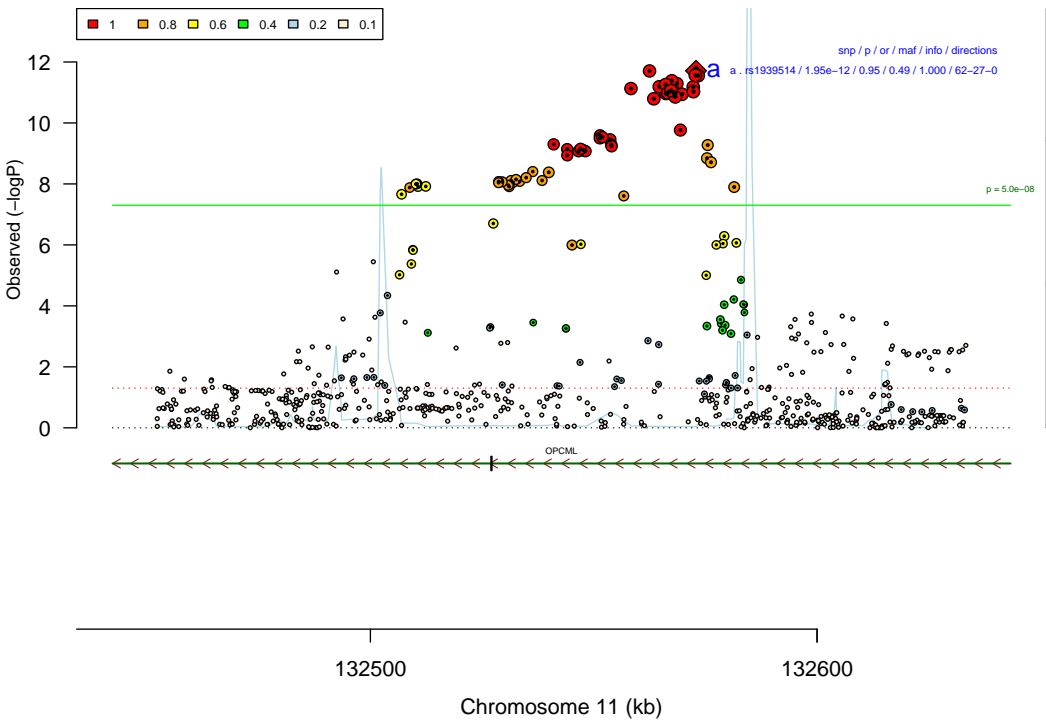

SCZ\_cond-rs1939514-chr11

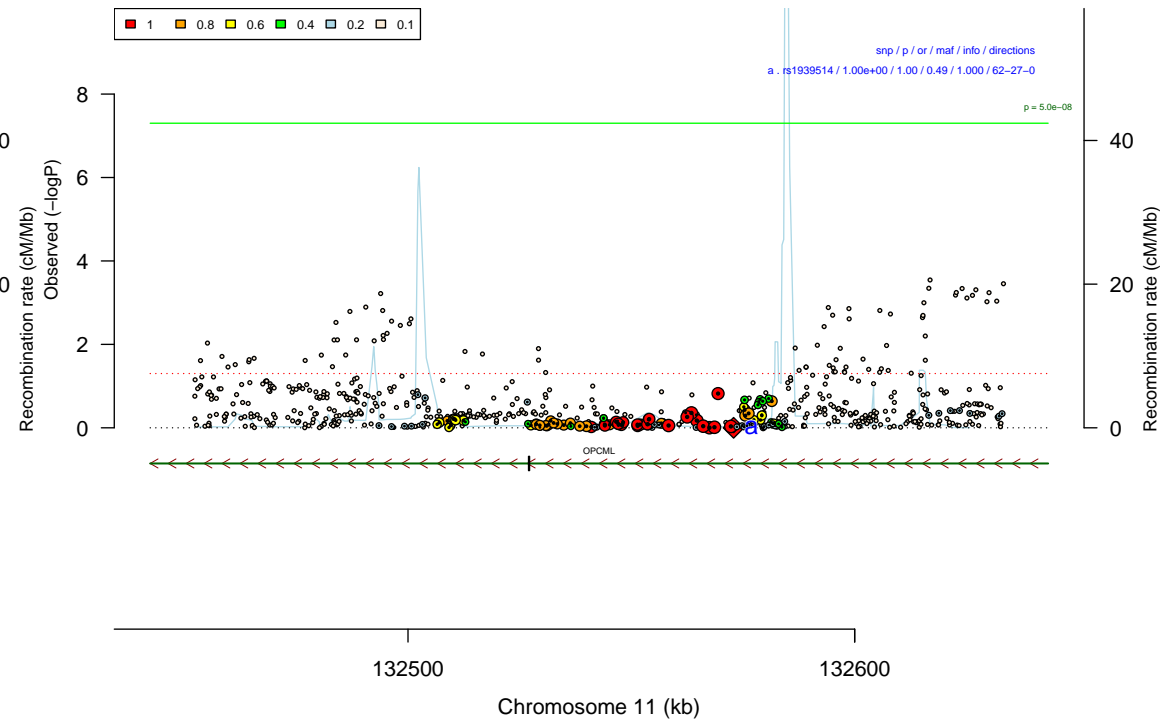

SCZ\_uncond-rs10515678-chr5

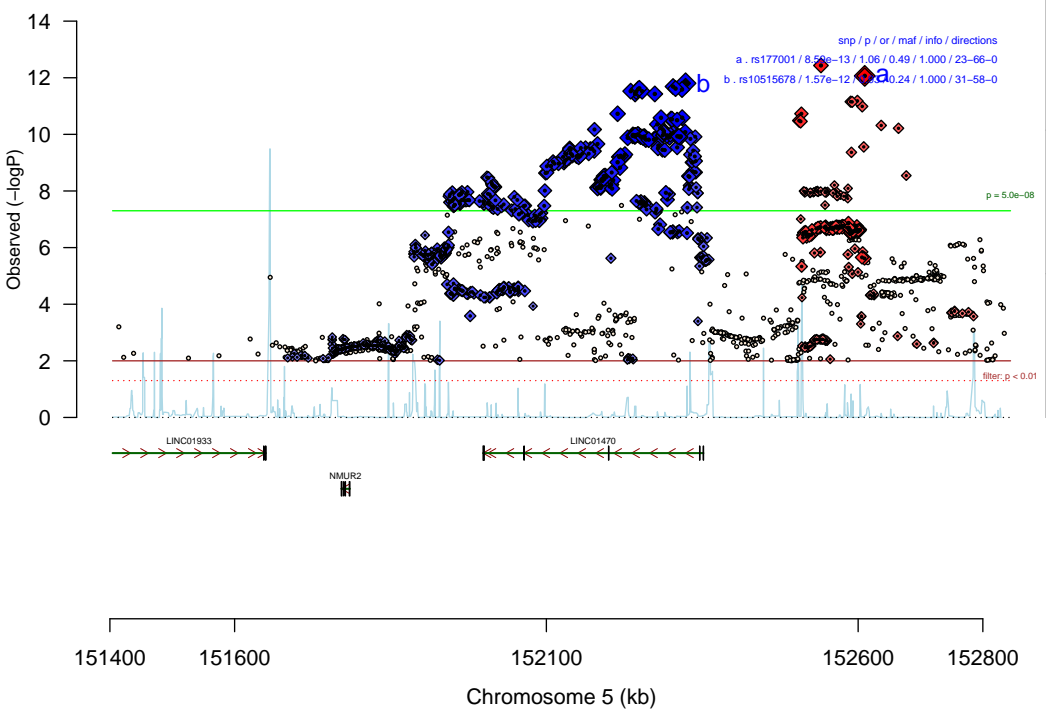

SCZ\_cond\_rs10515678-chr5

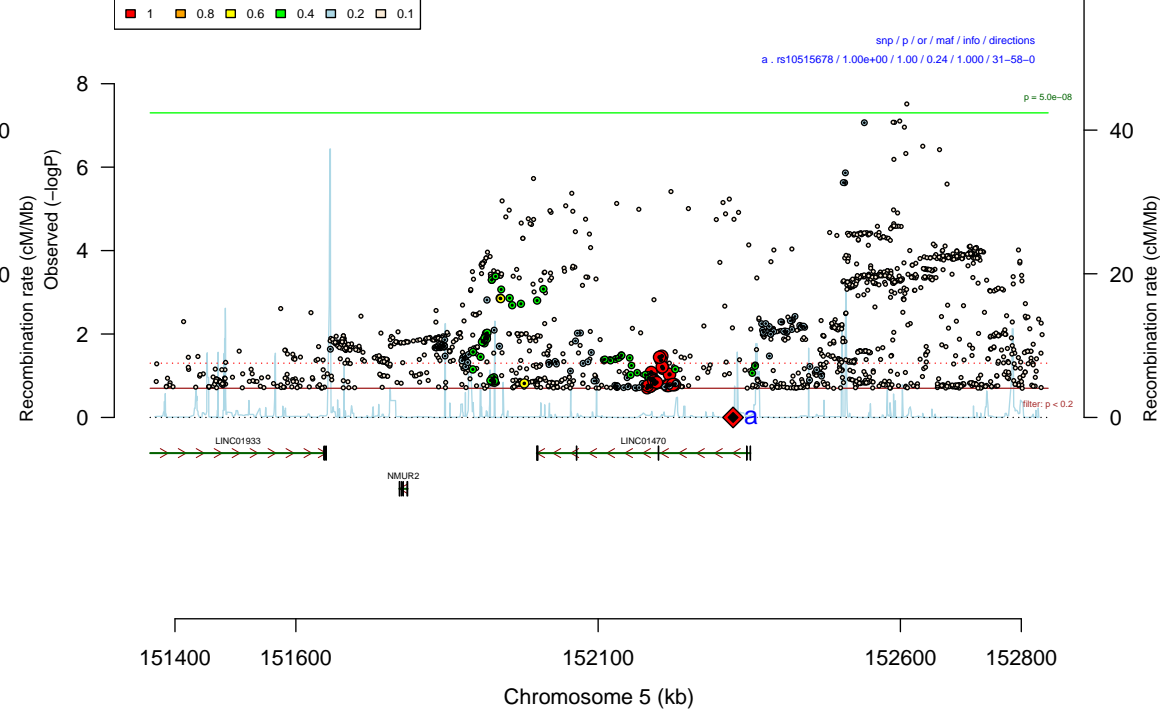

SCZ\_cond\_rs10515678-rs177001-chr5

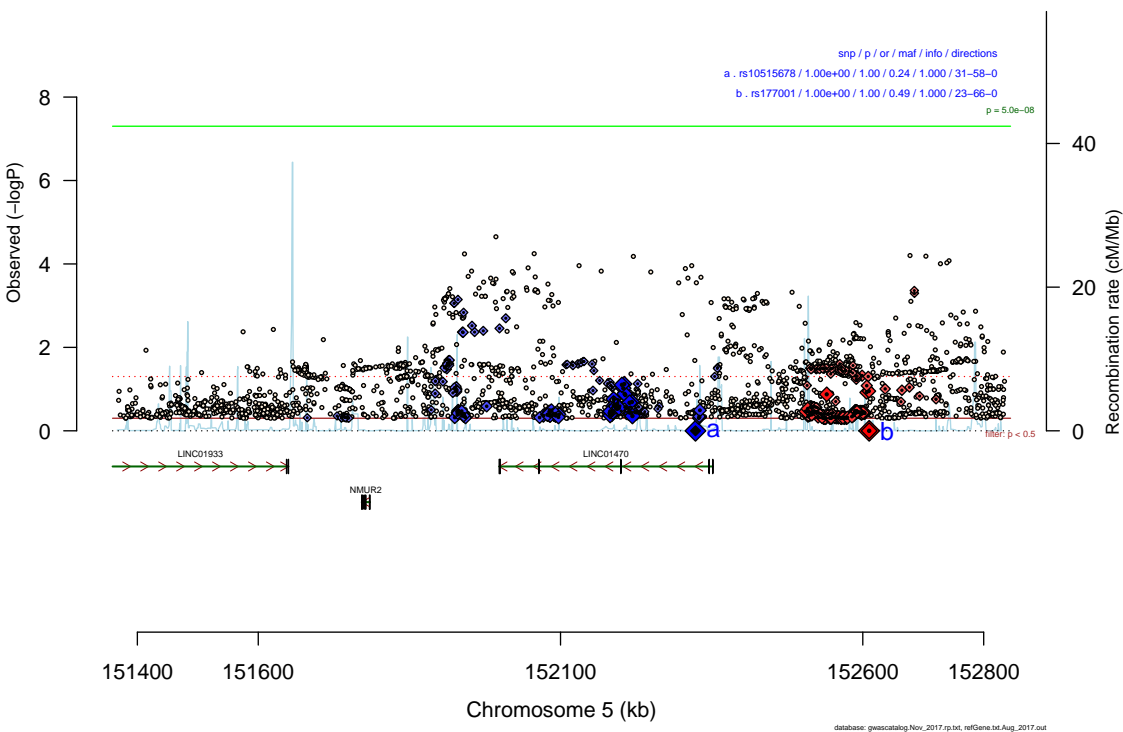

SCZ\_uncond-rs35351411-chr15

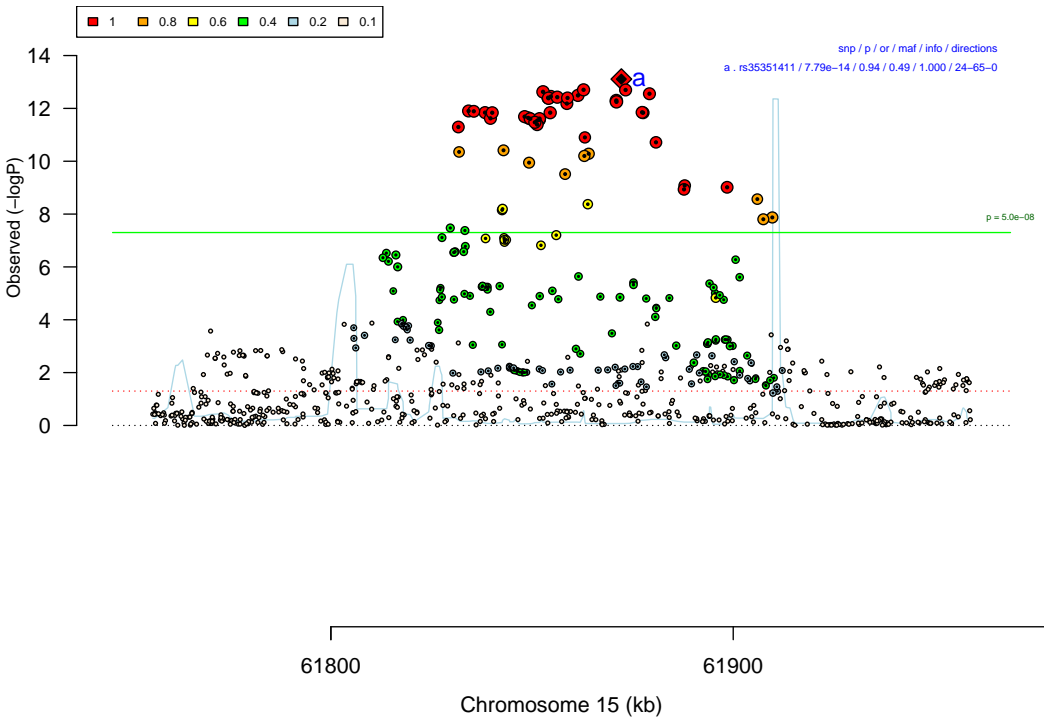

SCZ\_cond-rs35351411-chr15

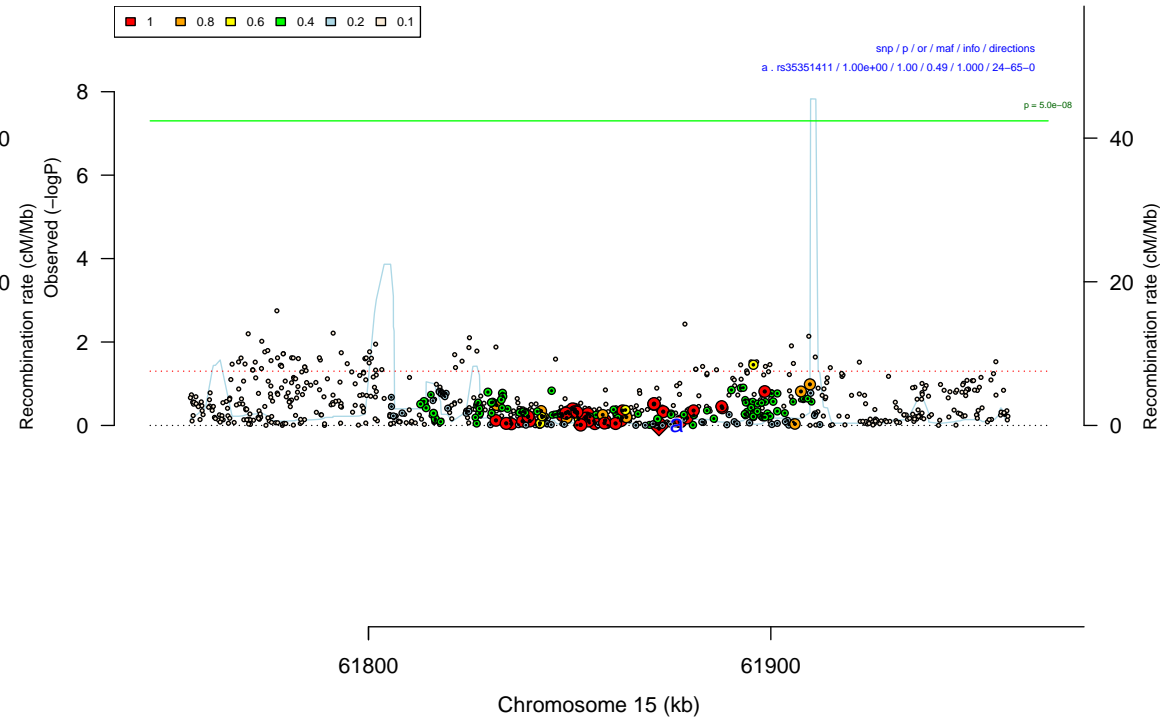

SCZ\_uncond-rs73229090-chr8

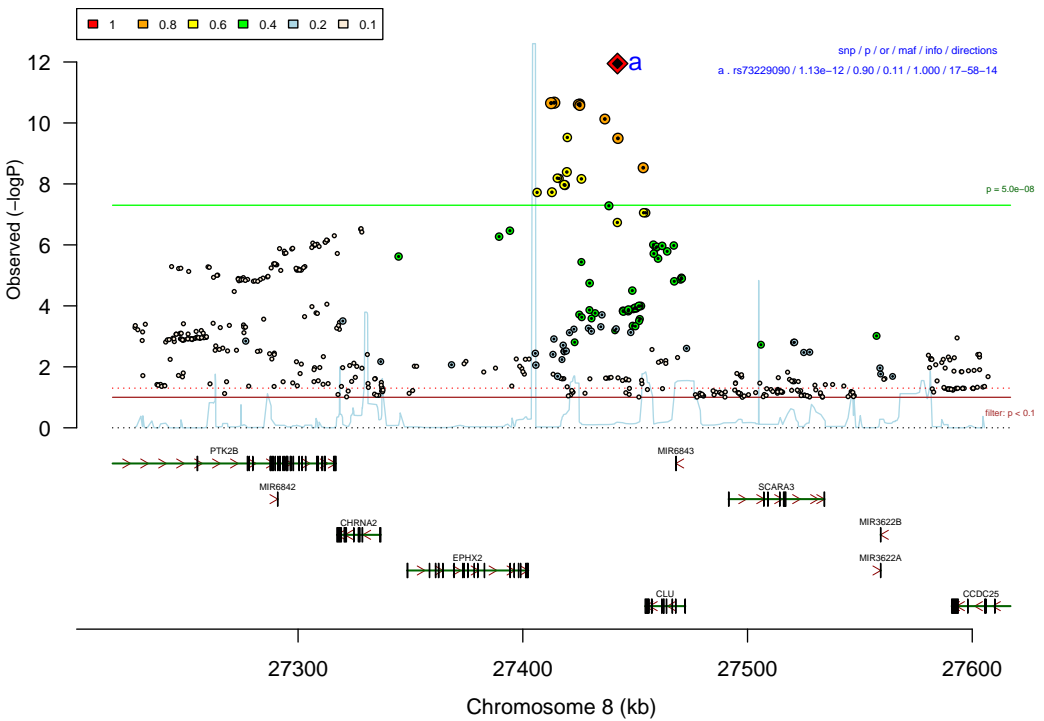

SCZ\_cond-rs73229090-chr8

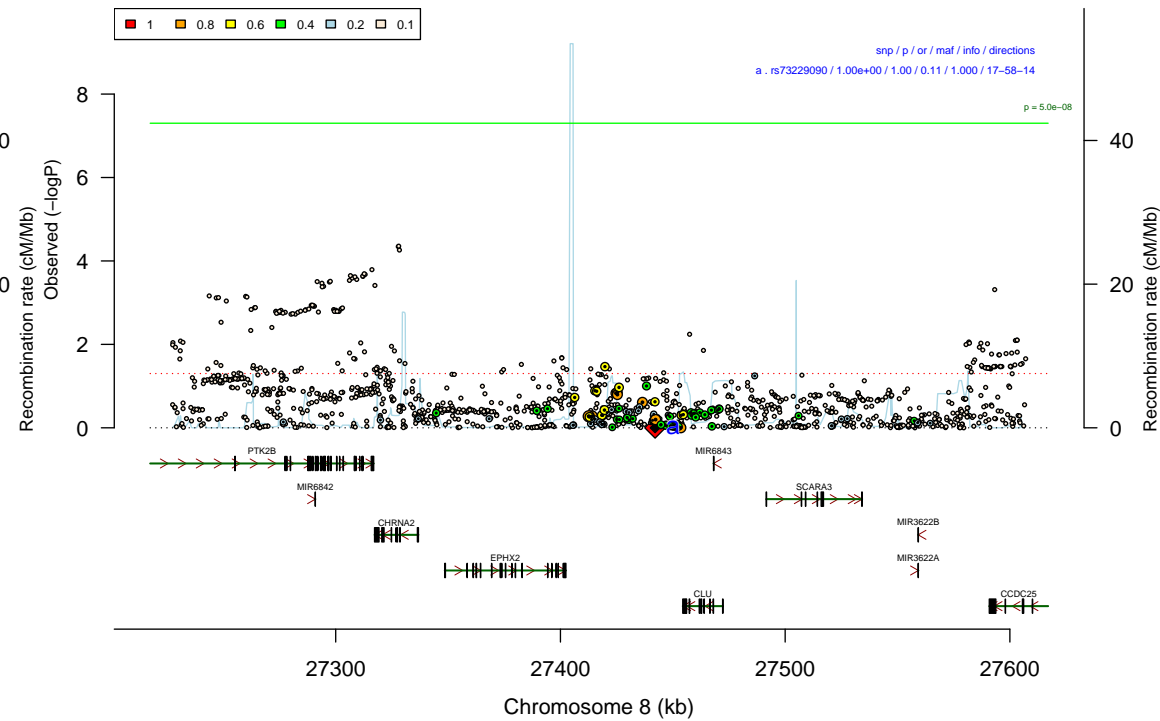

SCZ\_uncond-rs732381-chr22

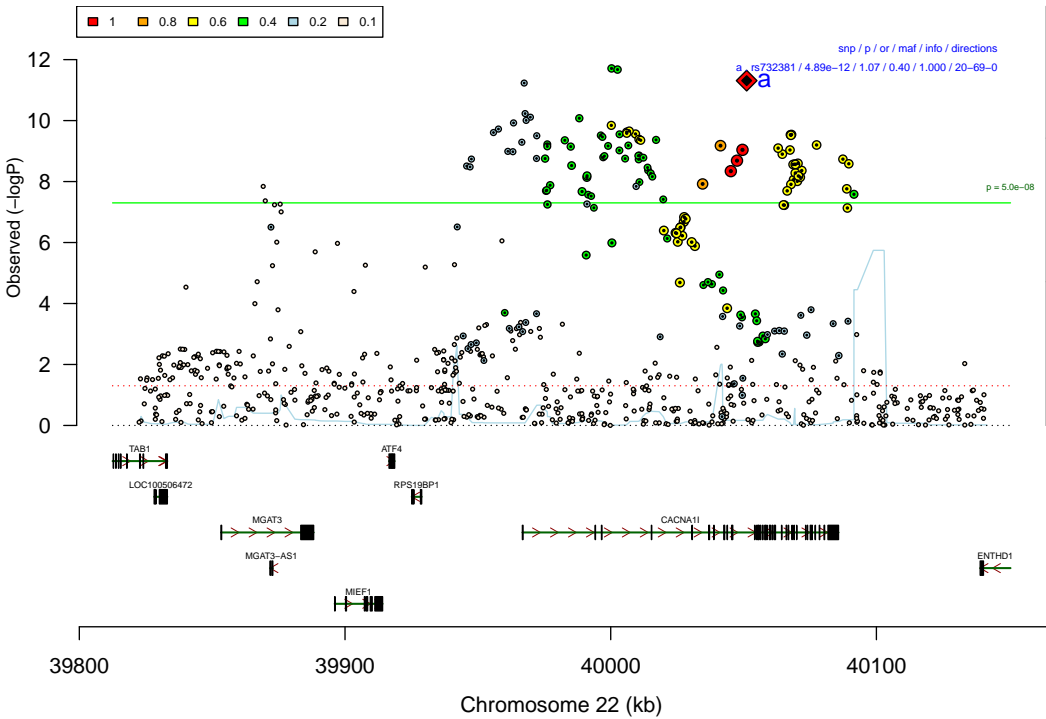

SCZ\_cond-rs732381-chr22

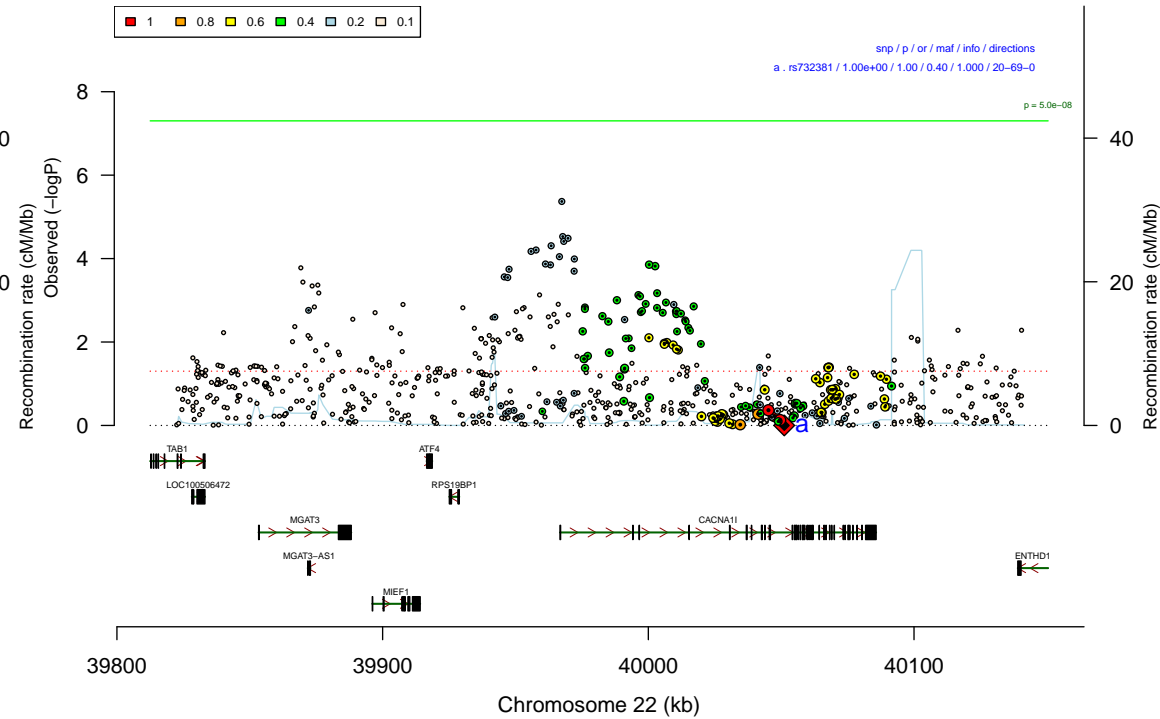

SCZ\_uncond-rs17731-chr10

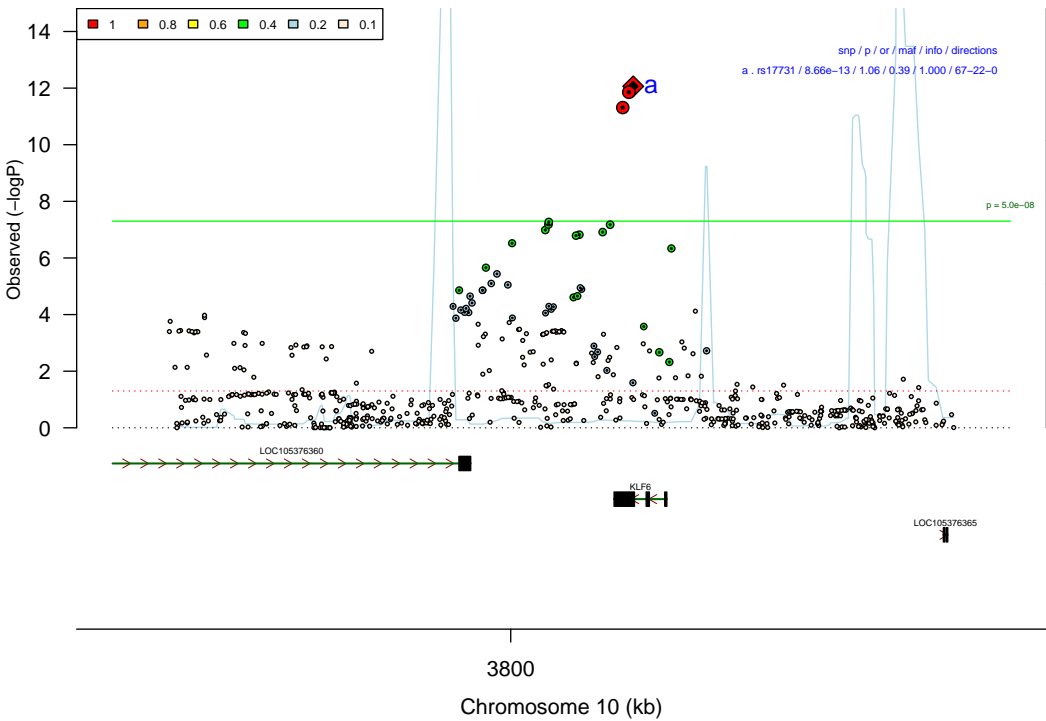

SCZ\_cond-rs17731-chr10

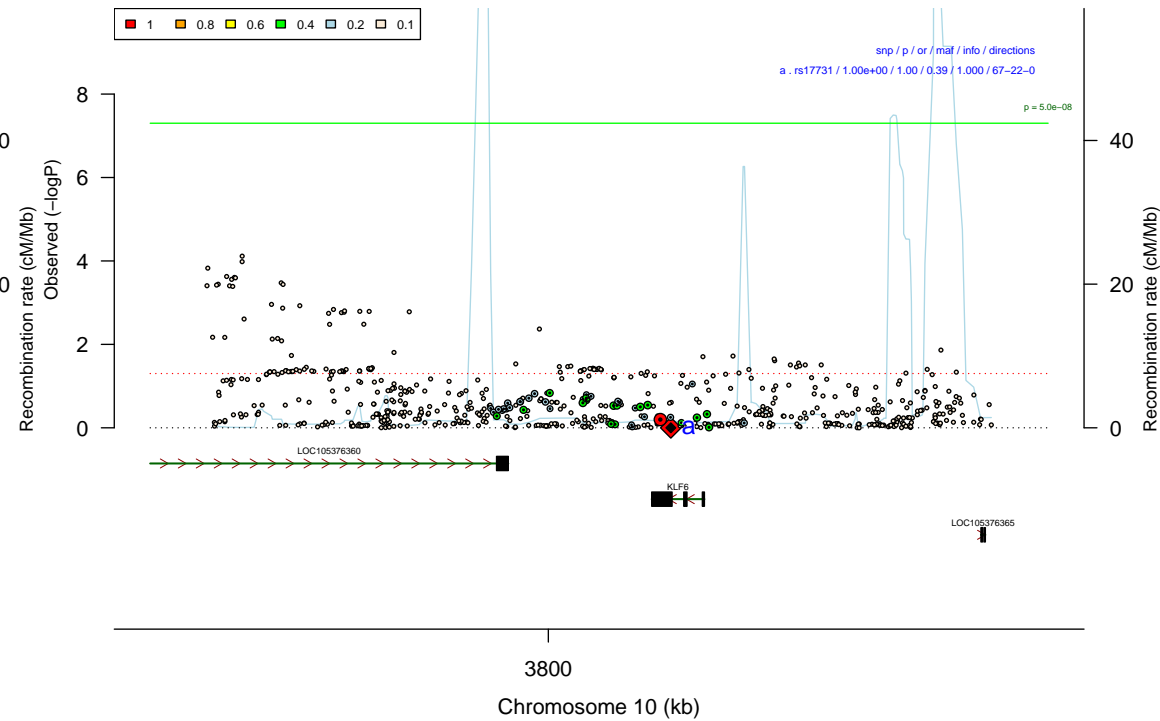

SCZ\_uncond-rs12883788-chr14

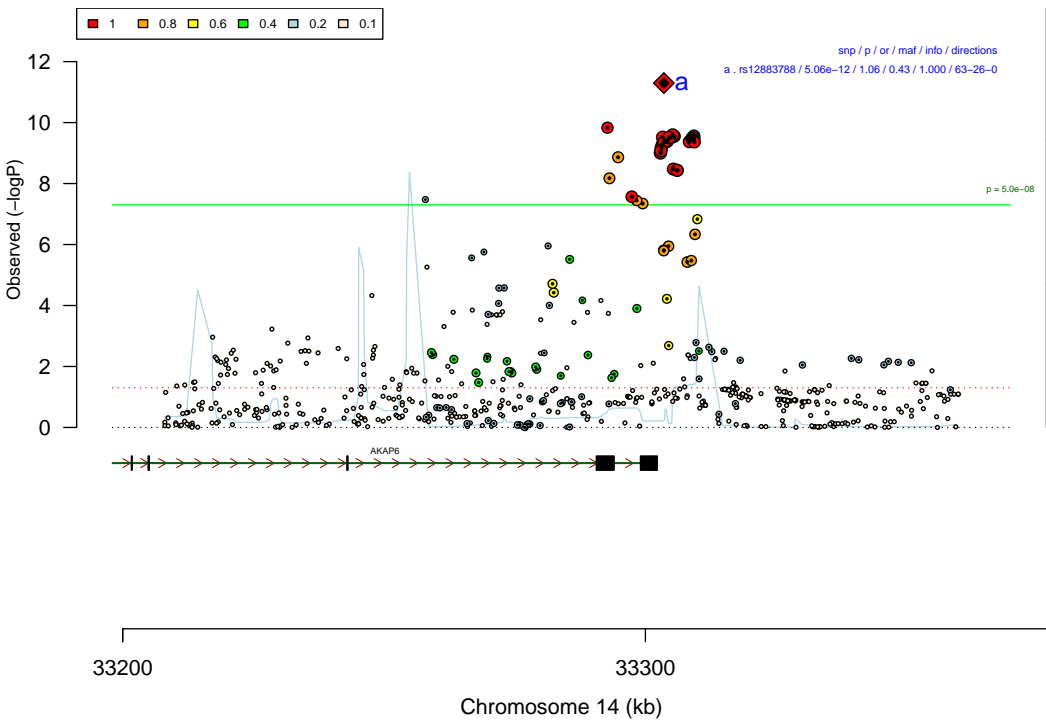

SCZ\_cond-rs12883788-chr14

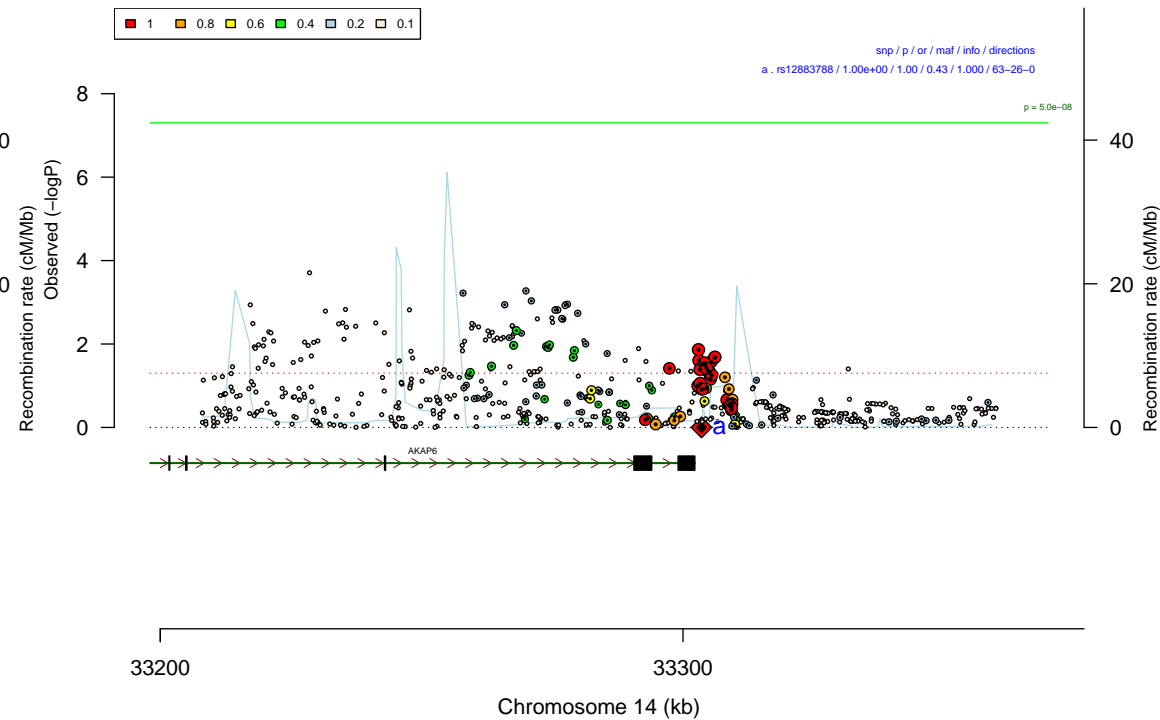

SCZ\_uncond-rs9545047-chr13

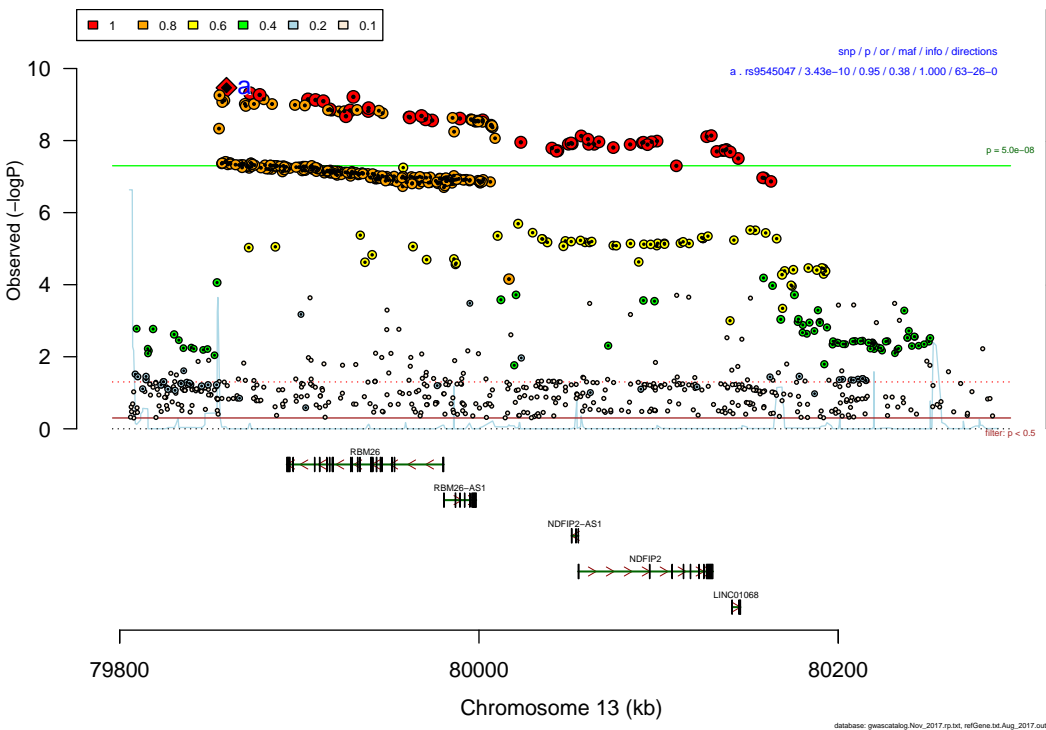

SCZ\_cond-rs9545047-chr13

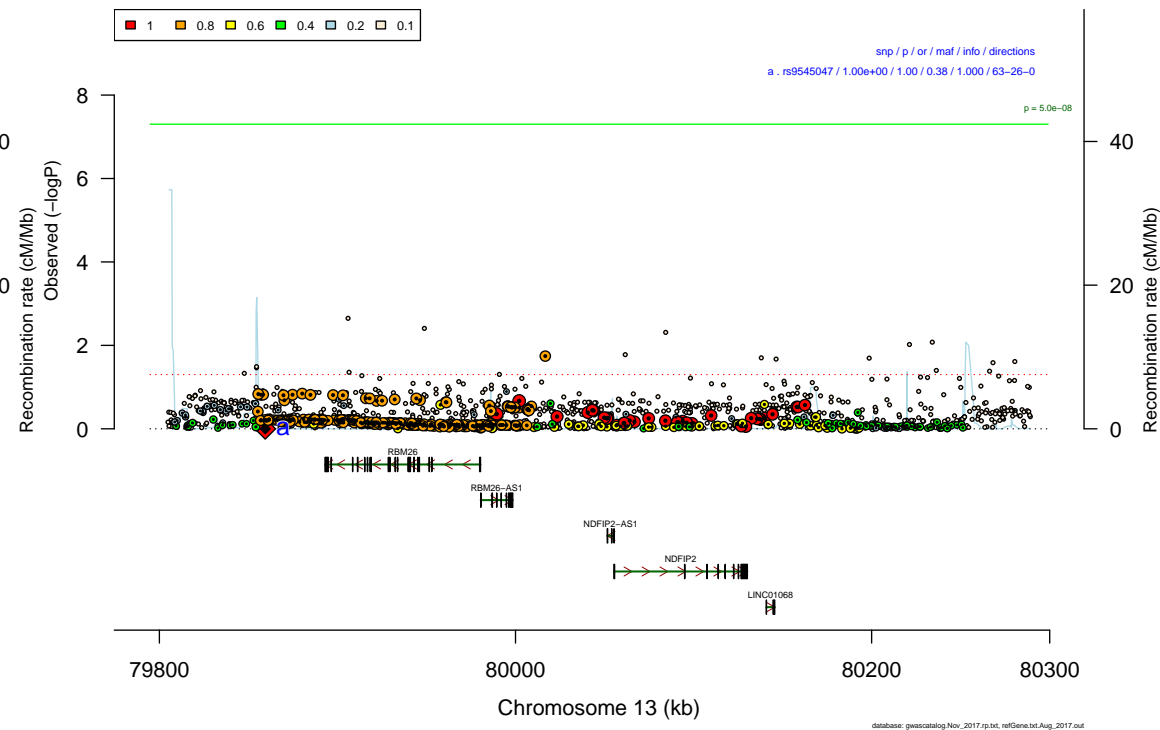

SCZ\_uncond-rs17194490-chr3

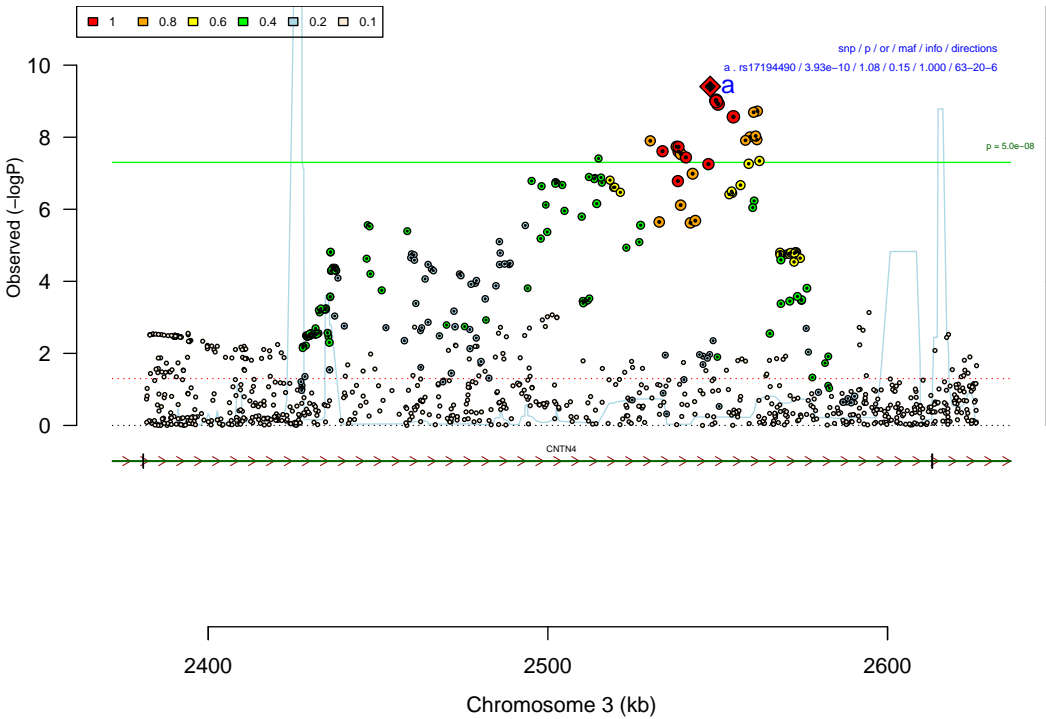

SCZ\_cond-rs17194490-chr3

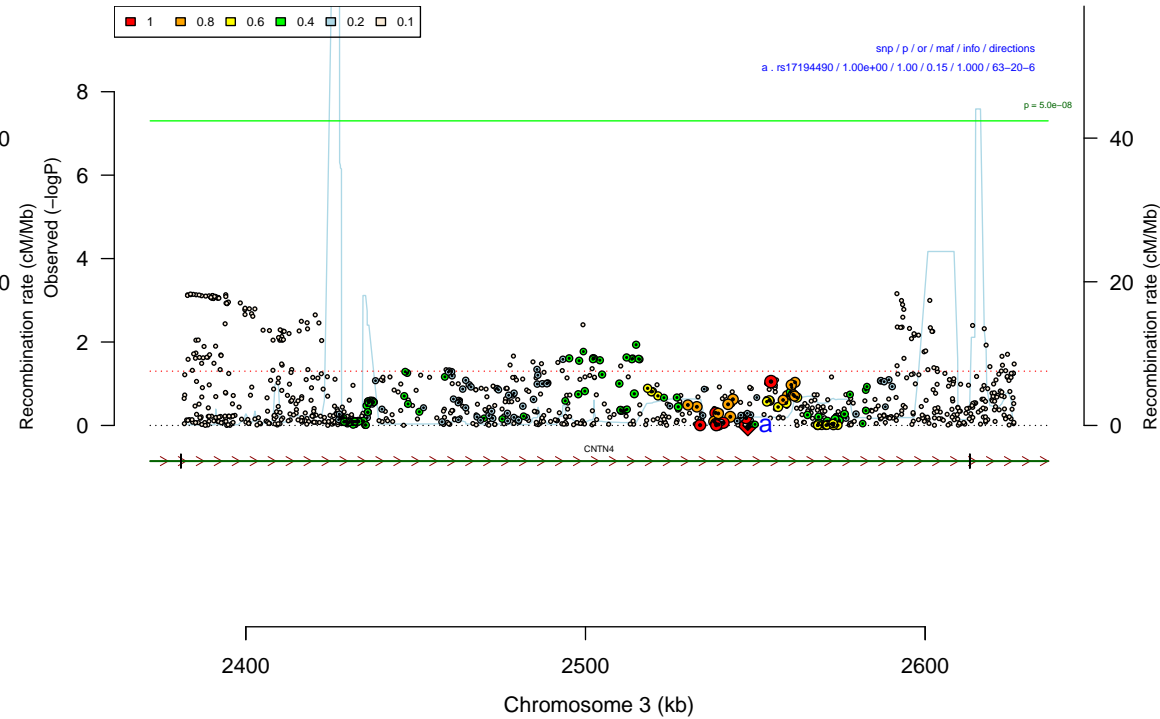

SCZ\_uncond-rs6673880-chr1

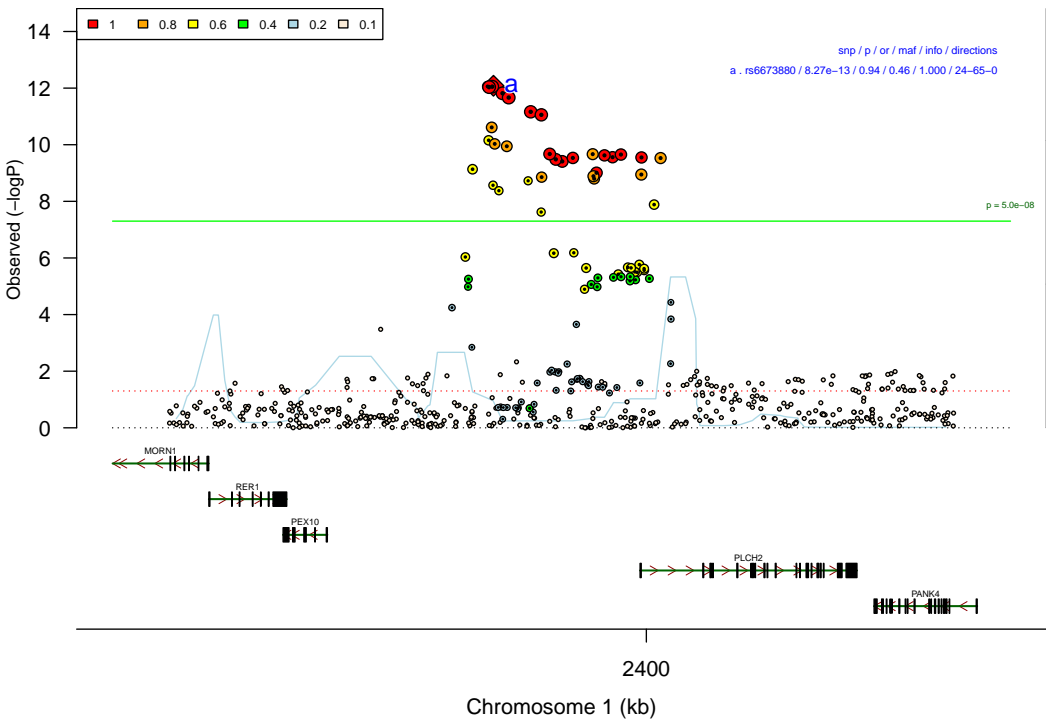

SCZ\_cond-rs6673880-chr1

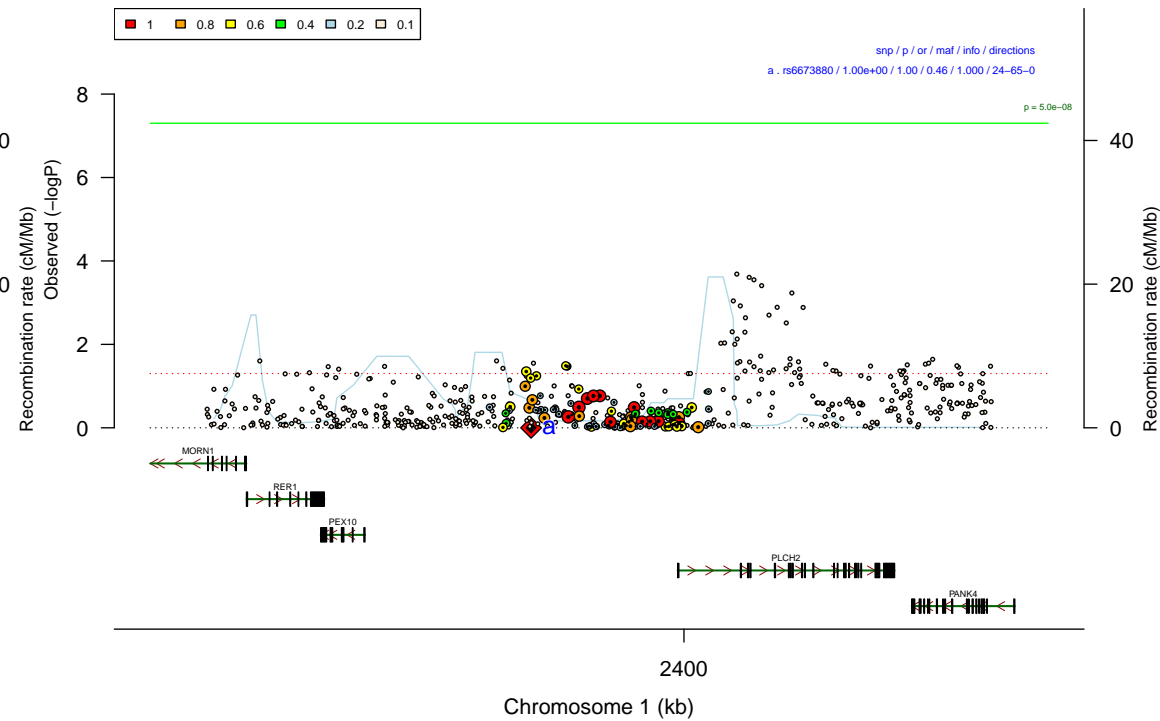



SCZ\_uncond-rs8055219-chr16

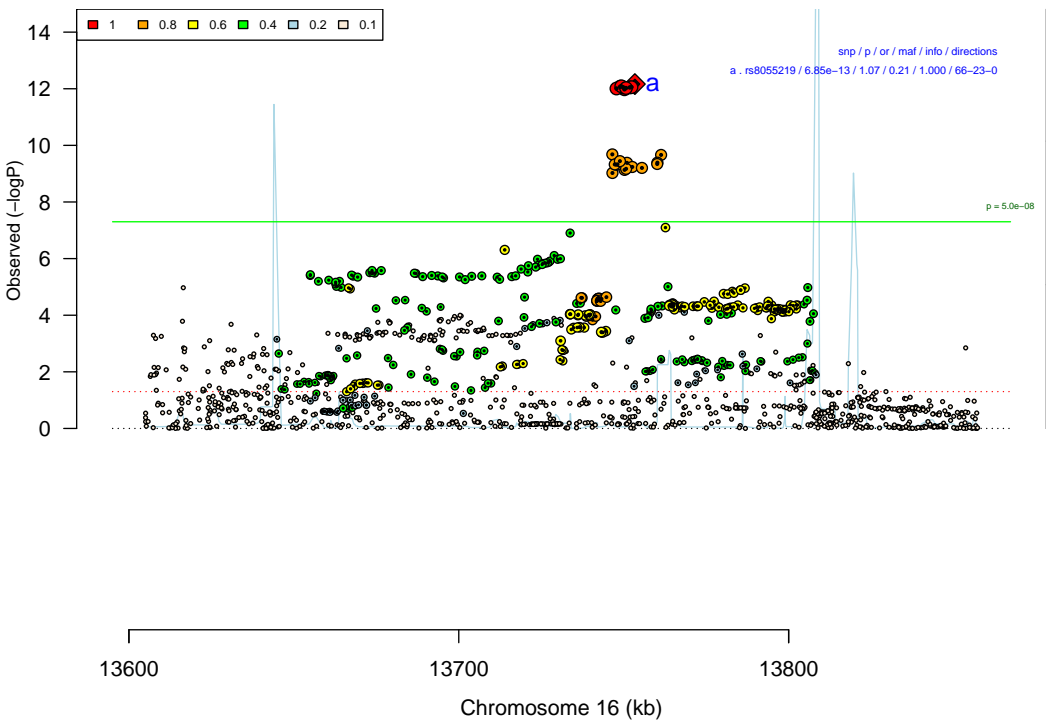

SCZ\_cond-rs8055219-chr16

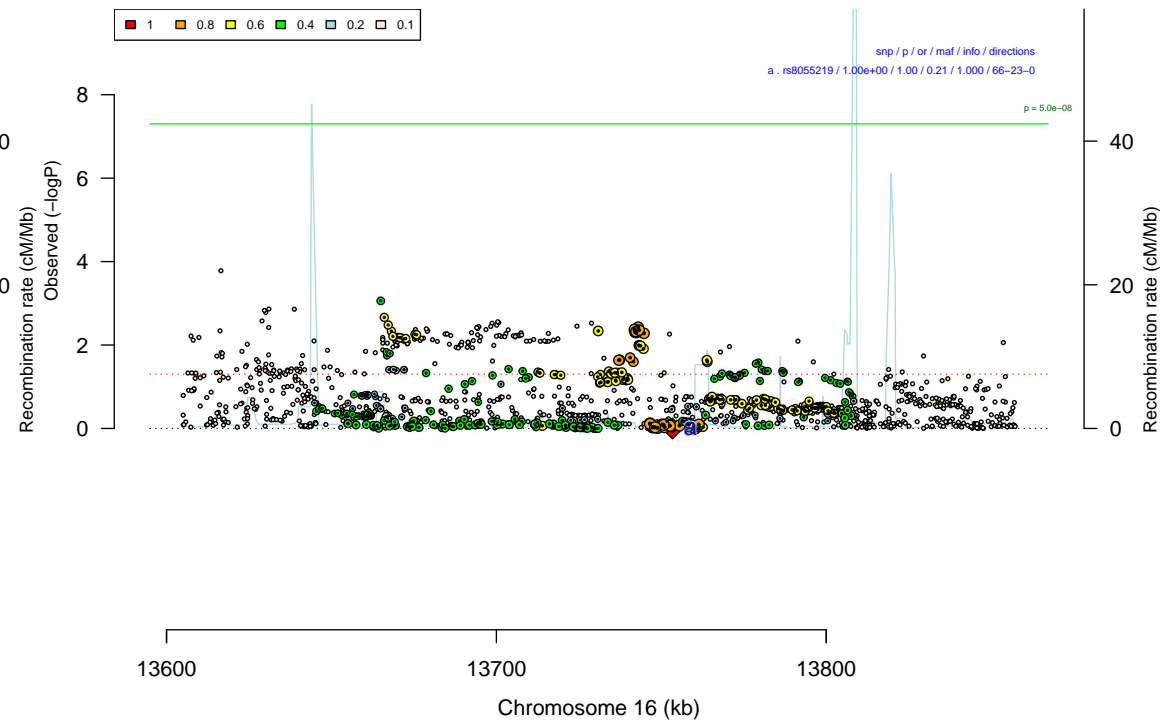

SCZ\_uncond-rs2929278-chr15

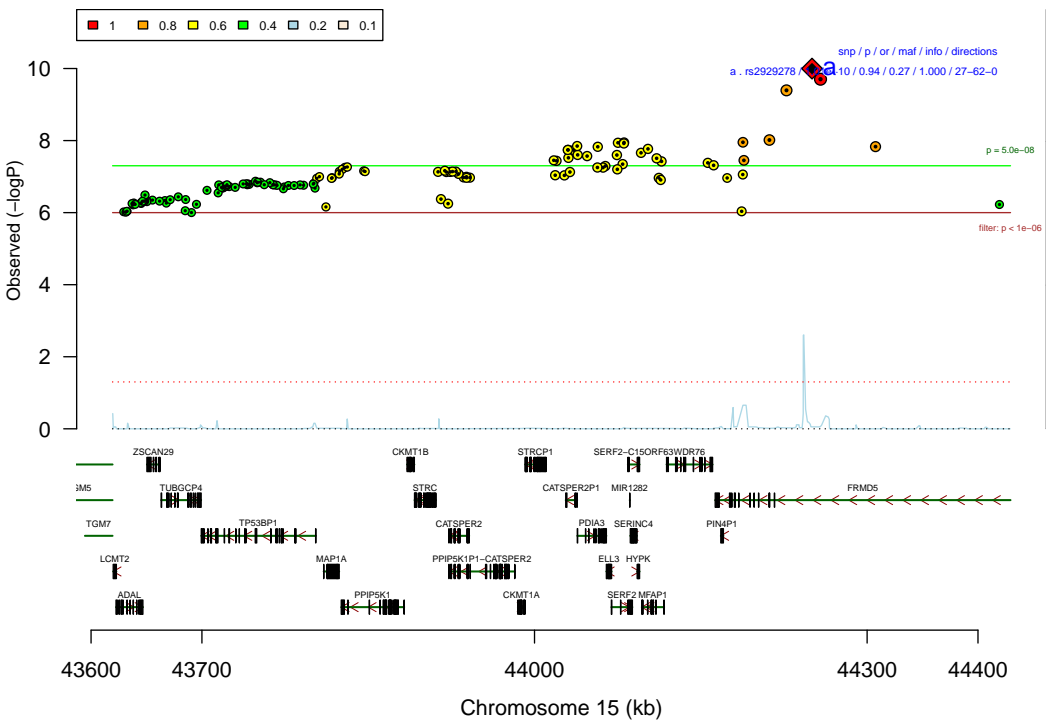

SCZ\_cond-rs2929278-chr15

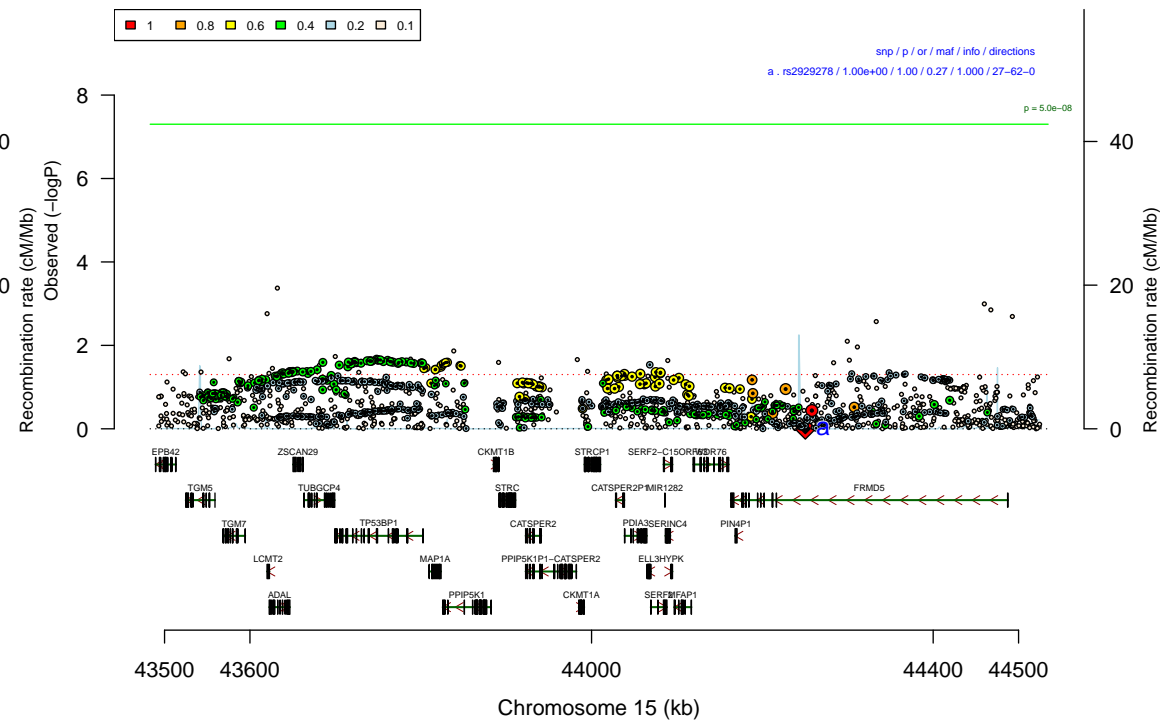

SCZ\_uncond-rs1940171-chr11

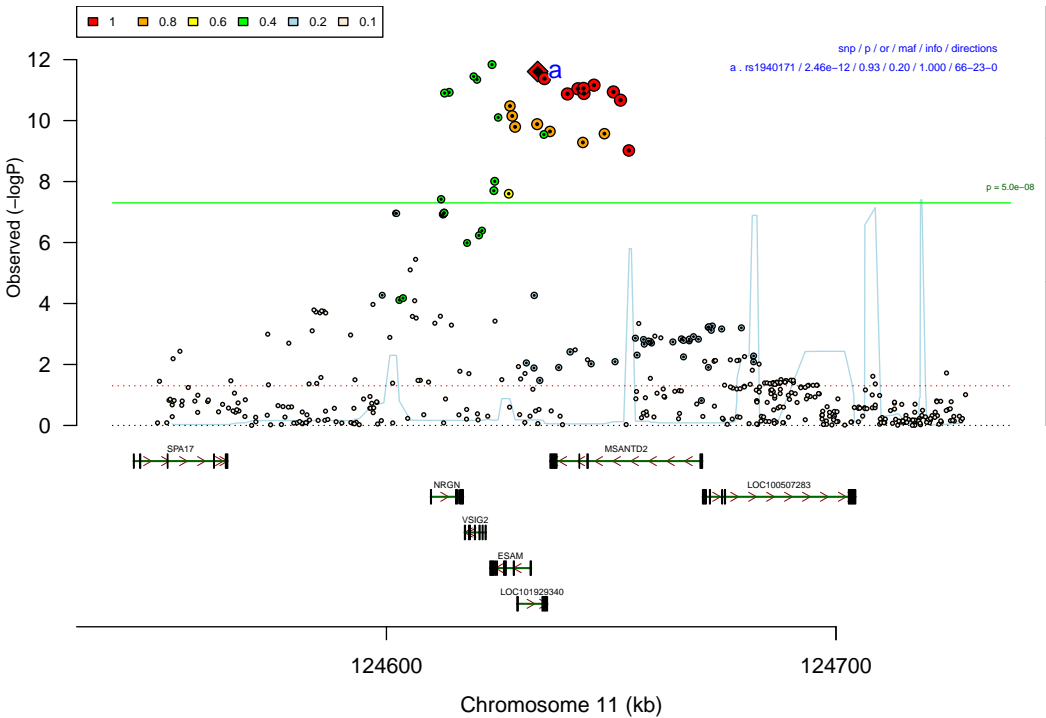

SCZ\_cond-rs1940171-chr11

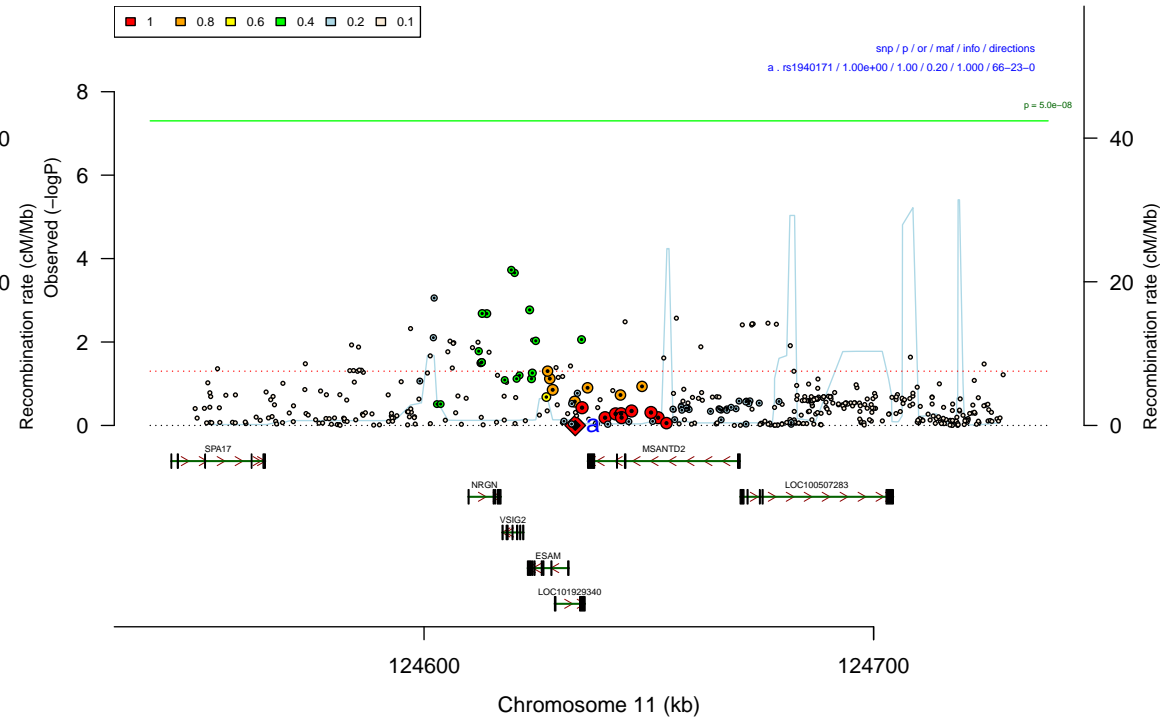

SCZ\_uncond-rs72728416-chr1

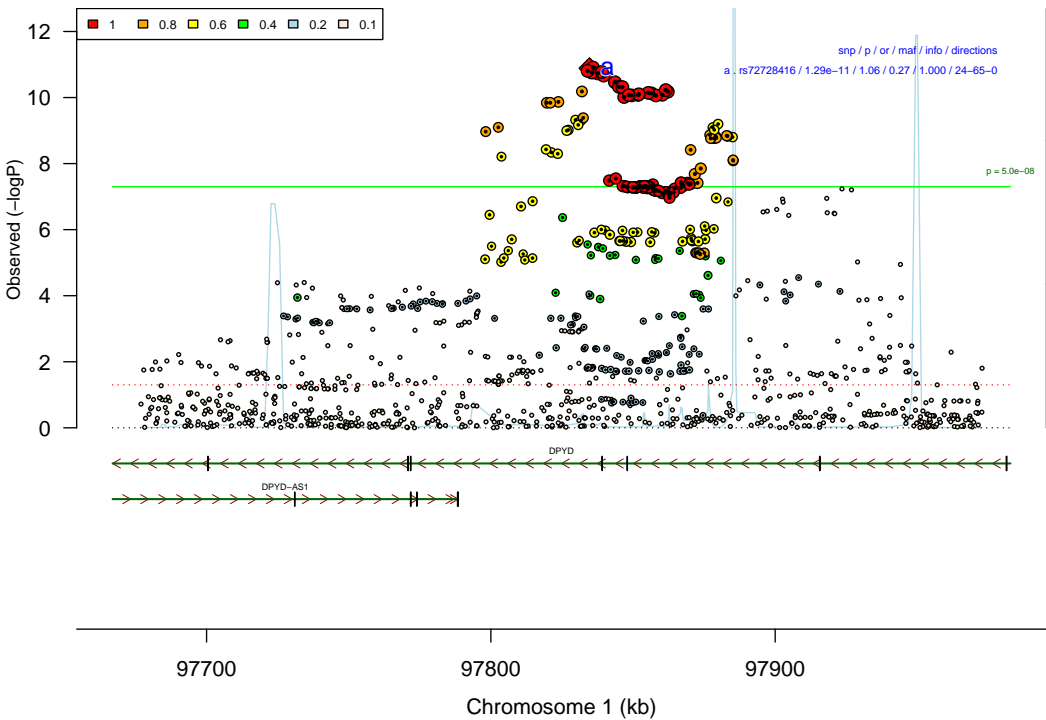

SCZ\_cond-rs72728416-chr1

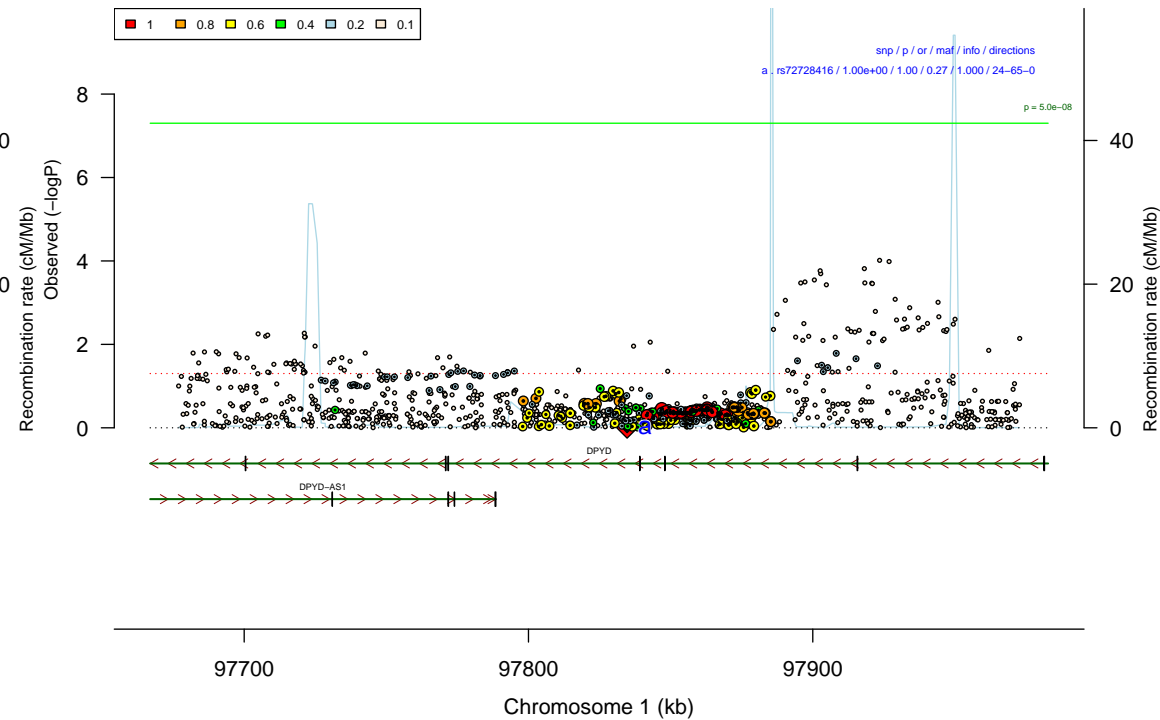

SCZ\_uncond-rs16851048-chr1

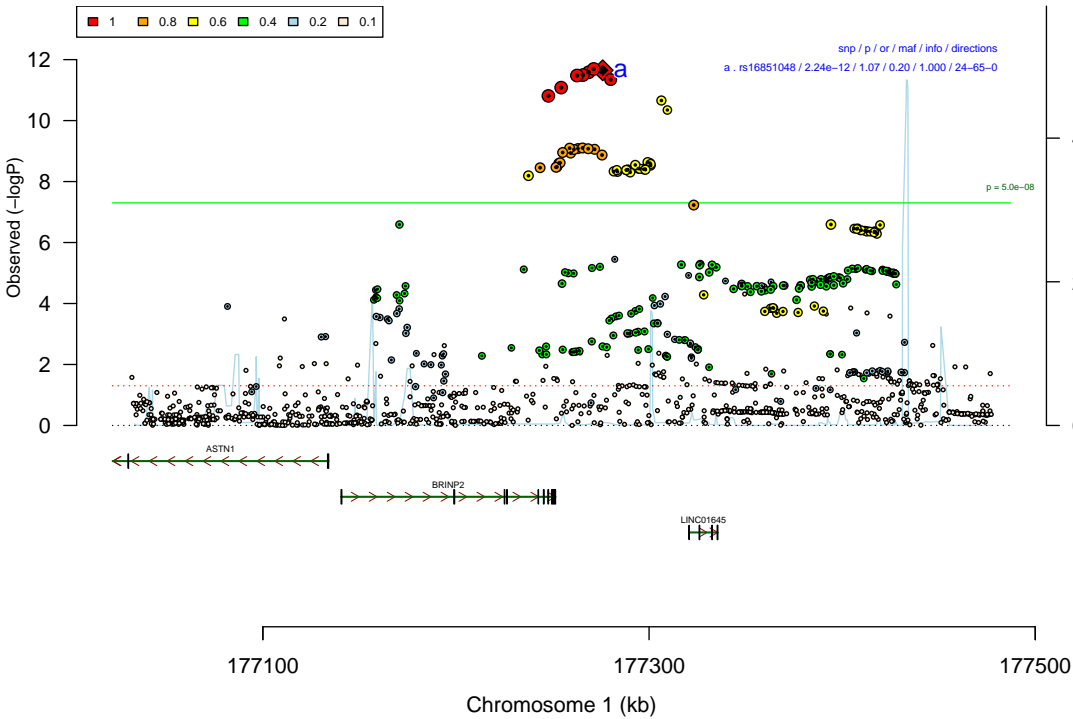

SCZ\_cond-rs16851048-chr1

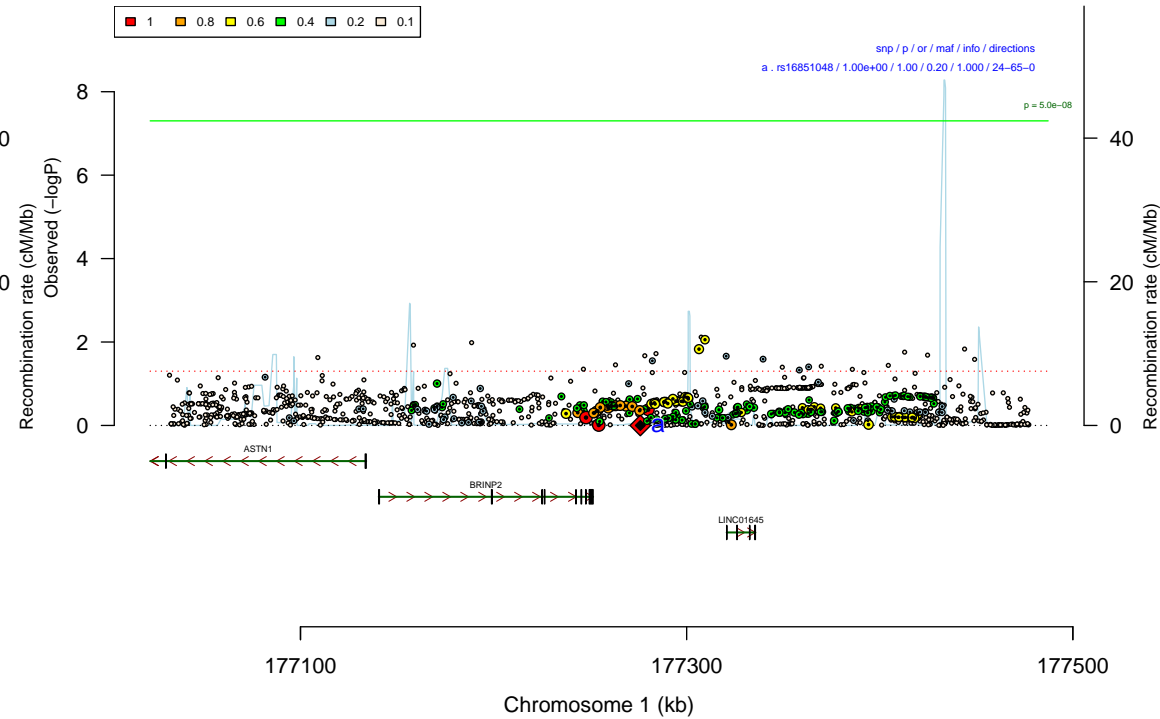

SCZ\_uncond-rs4073003-chr17

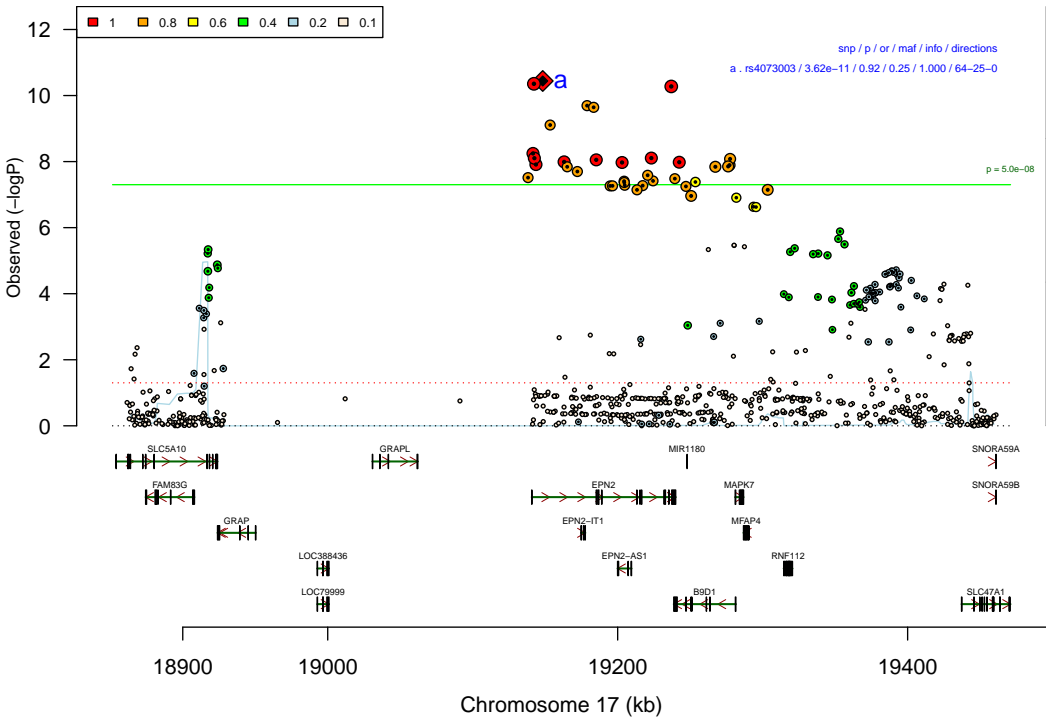

SCZ\_cond-rs4073003-chr17

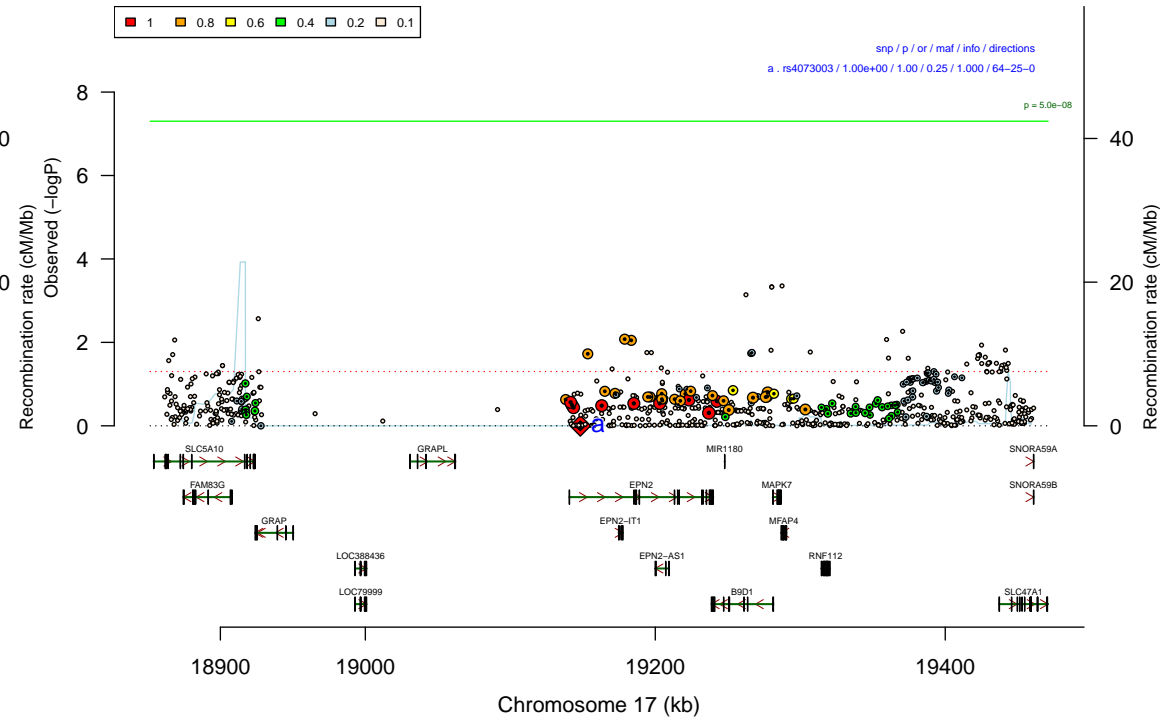

SCZ\_uncond-rs6969410-chr7

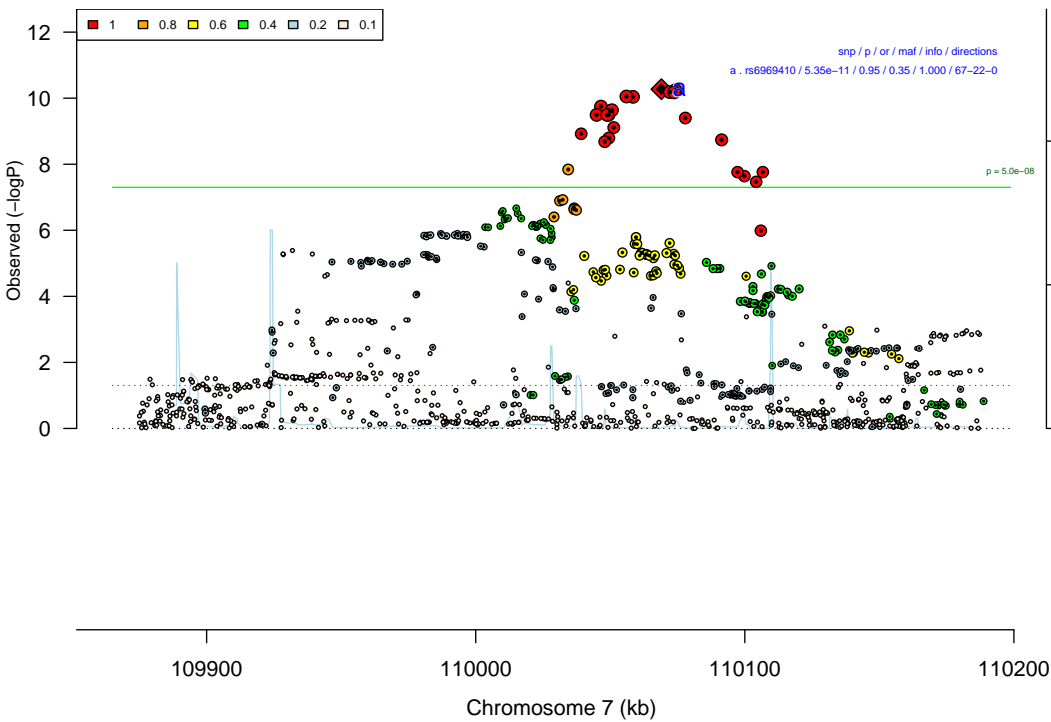

SCZ\_cond-rs6969410-chr7

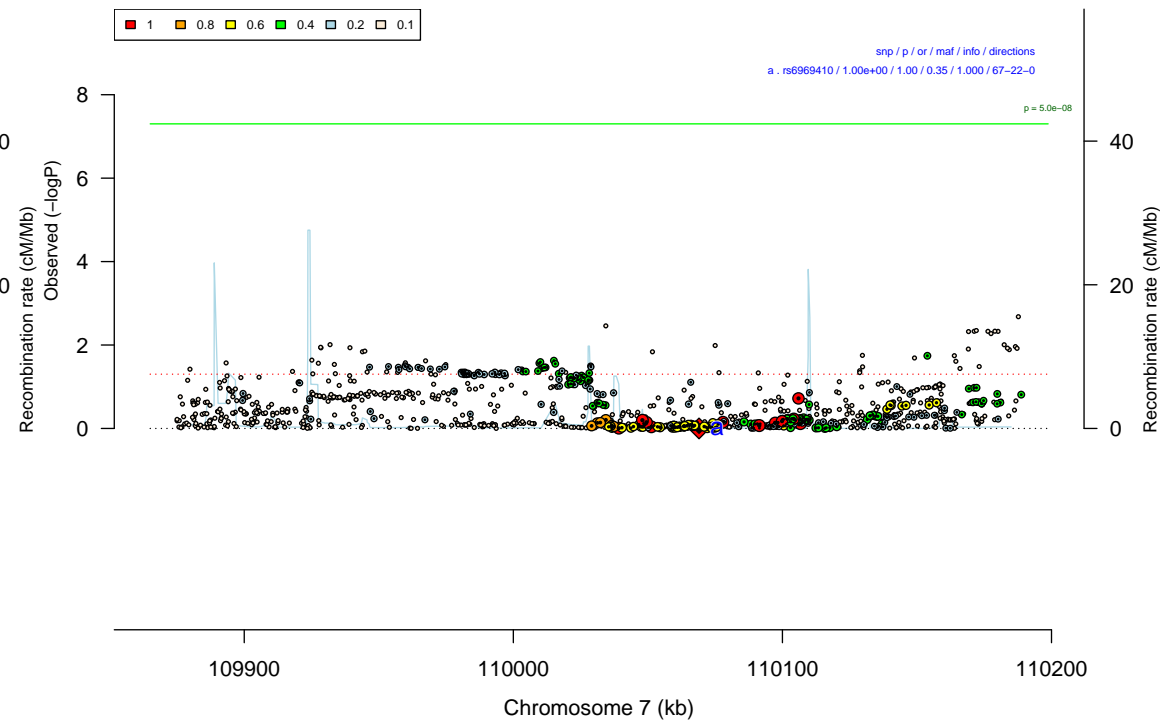

SCZ\_uncond-rs75968099-chr3

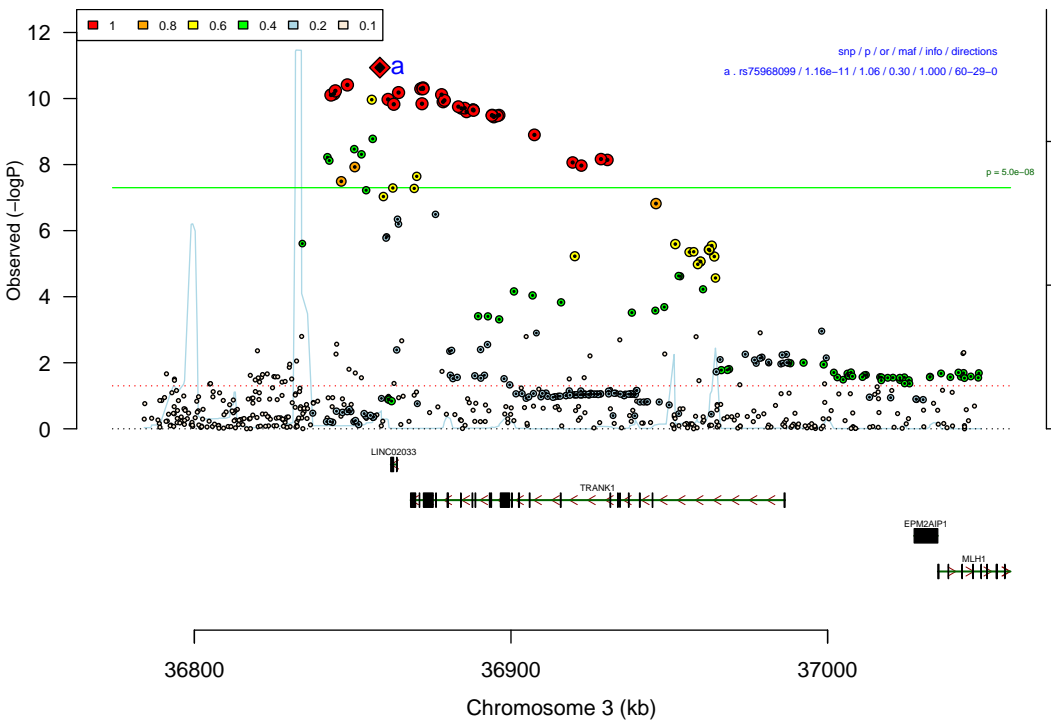

SCZ\_cond-rs75968099-chr3

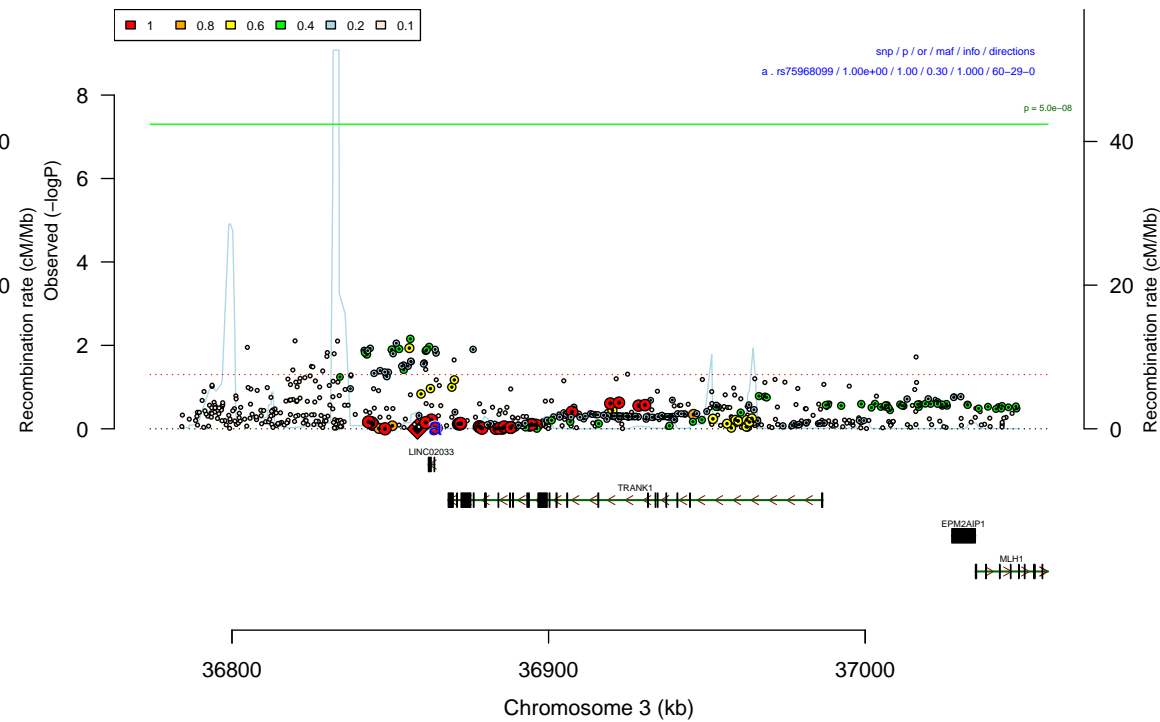

SCZ\_uncond-rs3808581-chr8

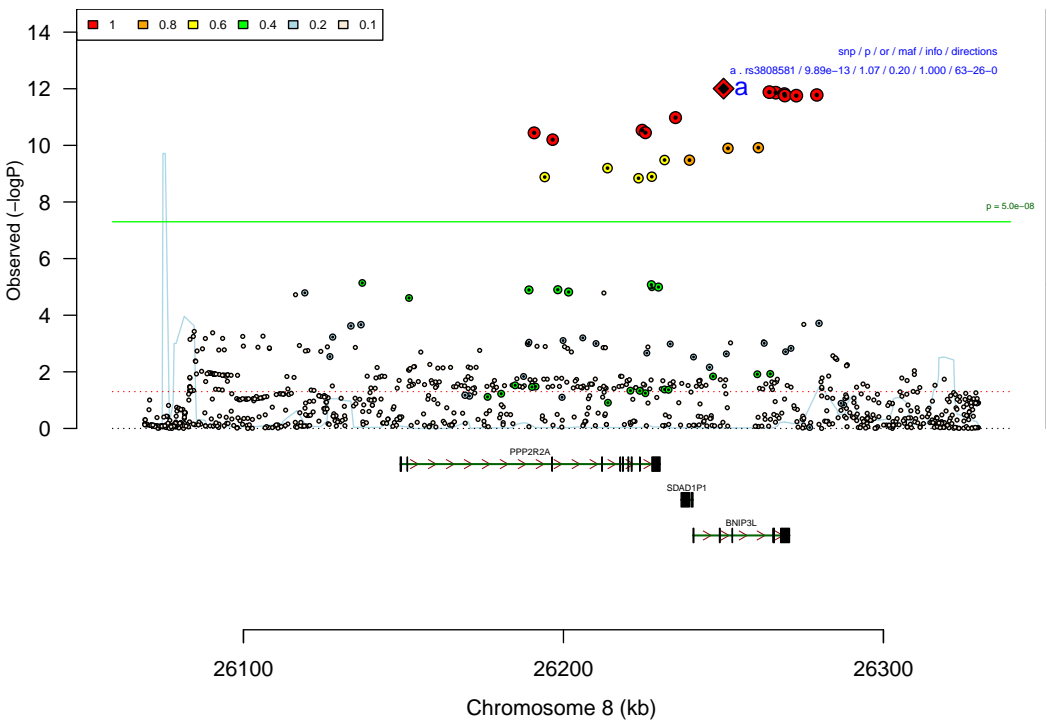

SCZ\_cond-rs3808581-chr8

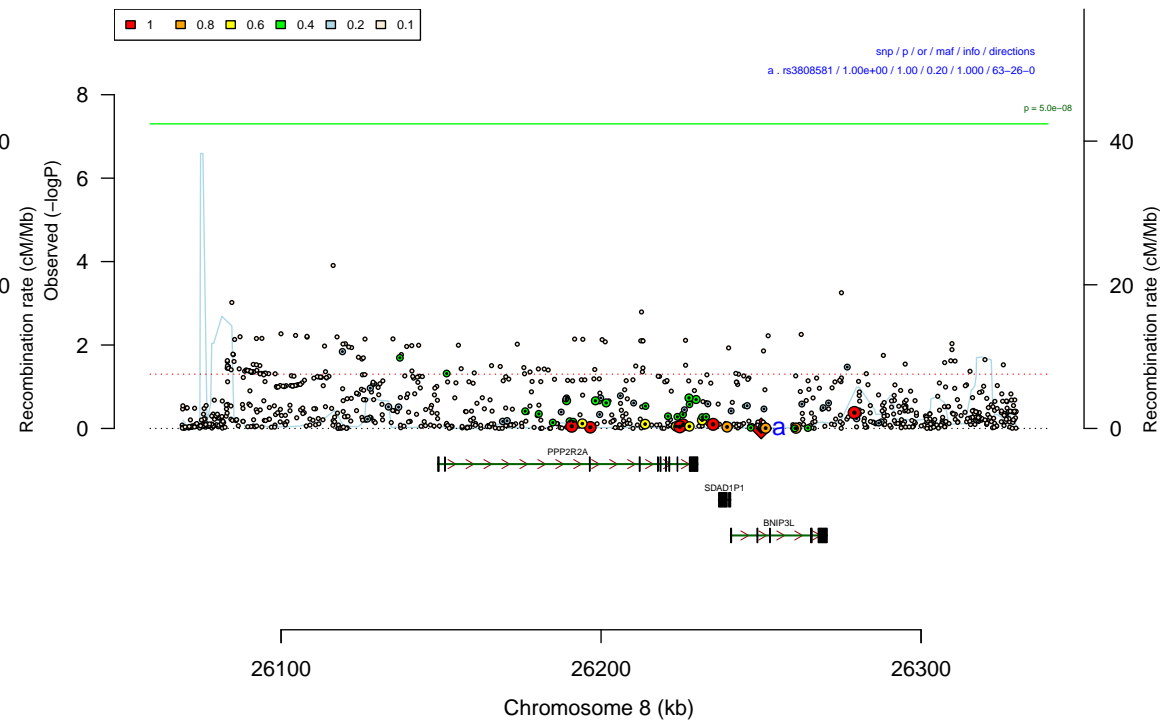

SCZ\_uncond-rs79210963-chr7

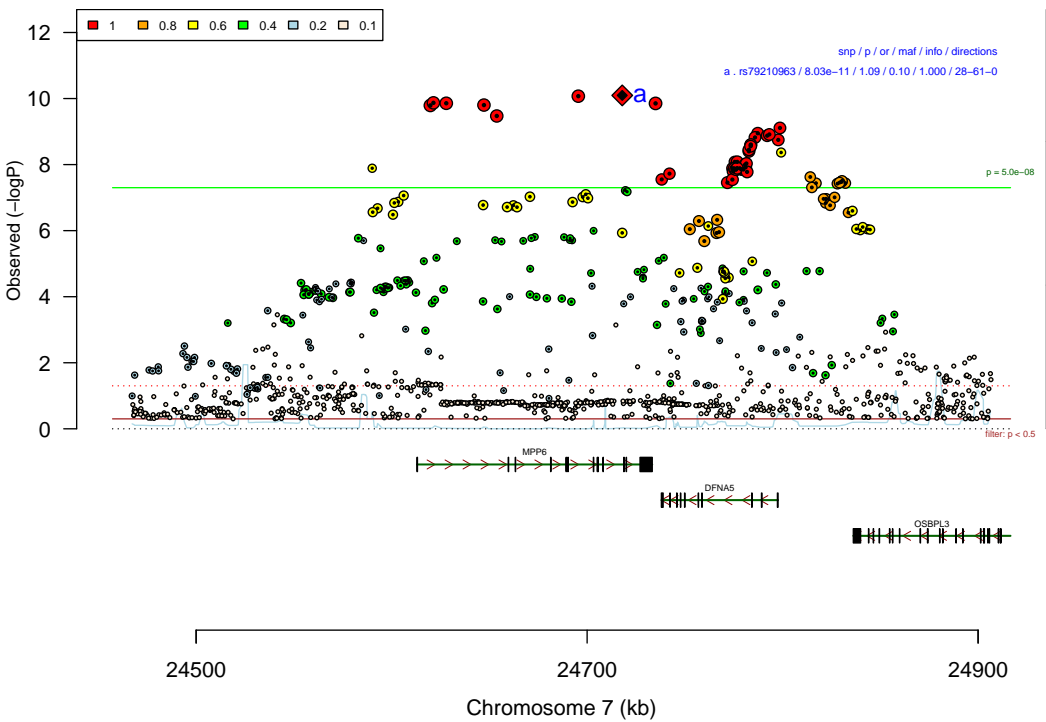

SCZ\_cond-rs79210963-chr7

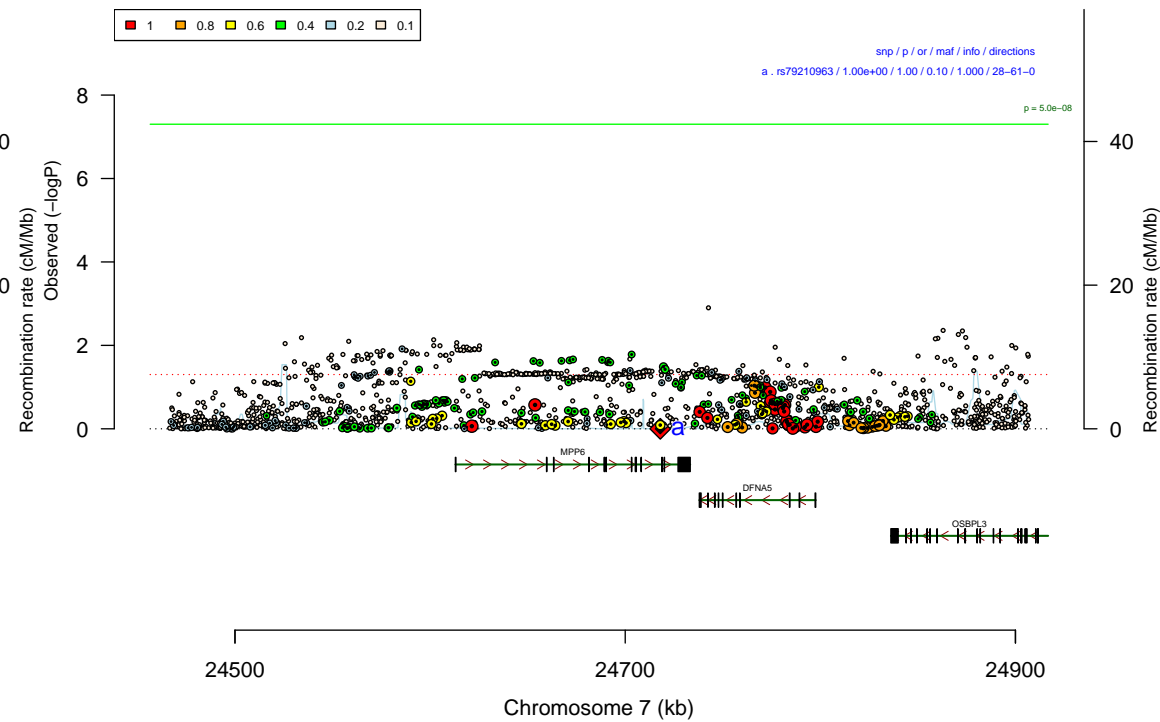

SCZ\_uncond-rs61833239-chr1

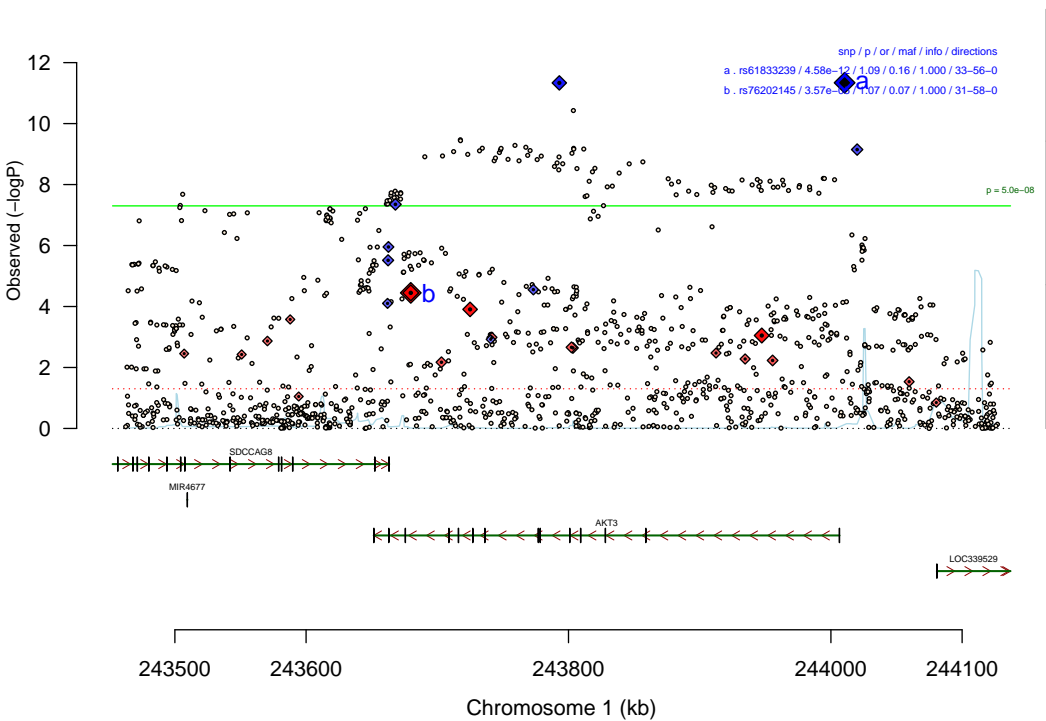

SCZ\_cond\_rs61833239-chr1

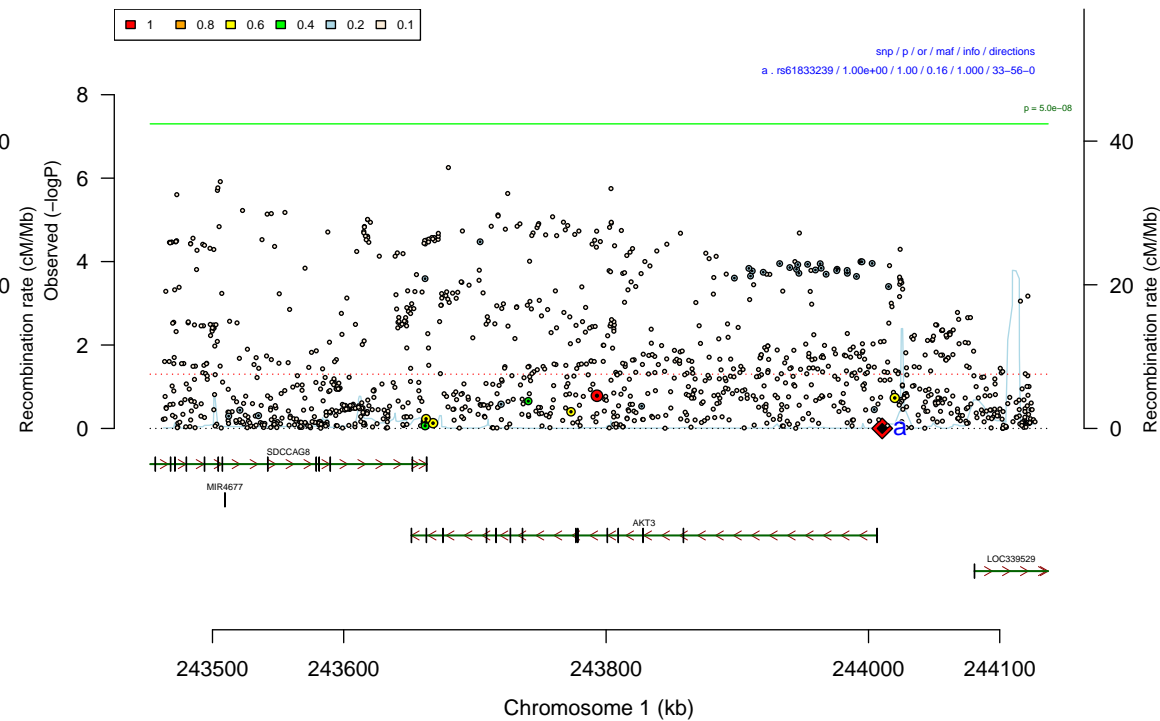

SCZ\_cond\_rs61833239-rs76202145-chr1

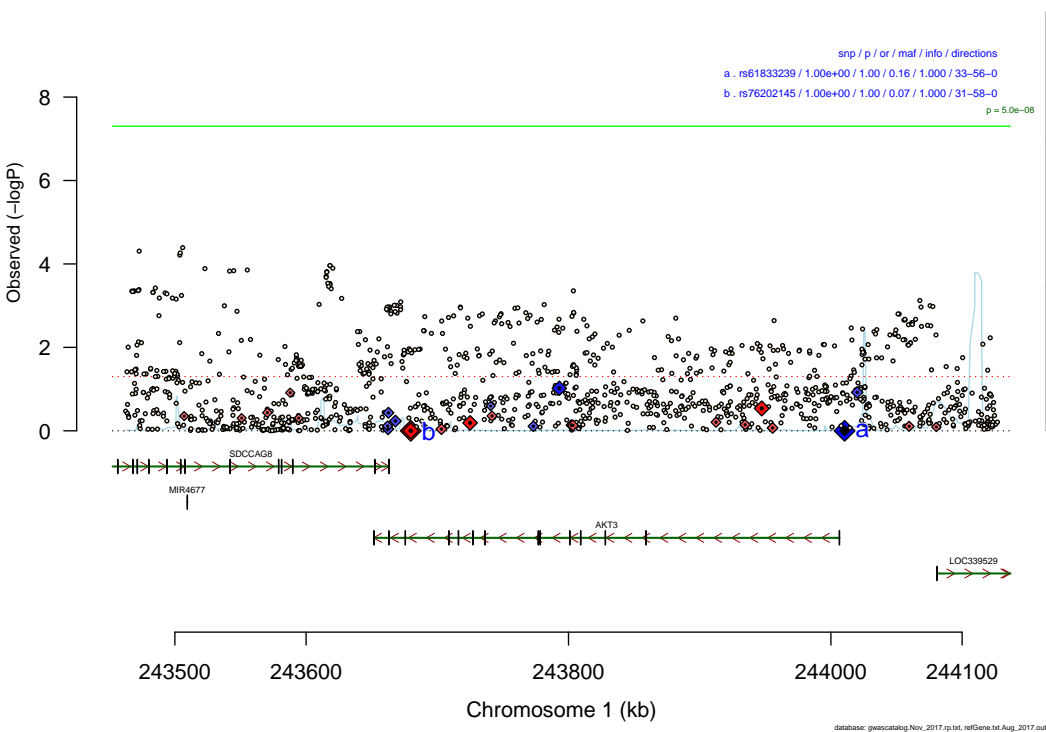

SCZ\_uncond-rs16825349-chr2

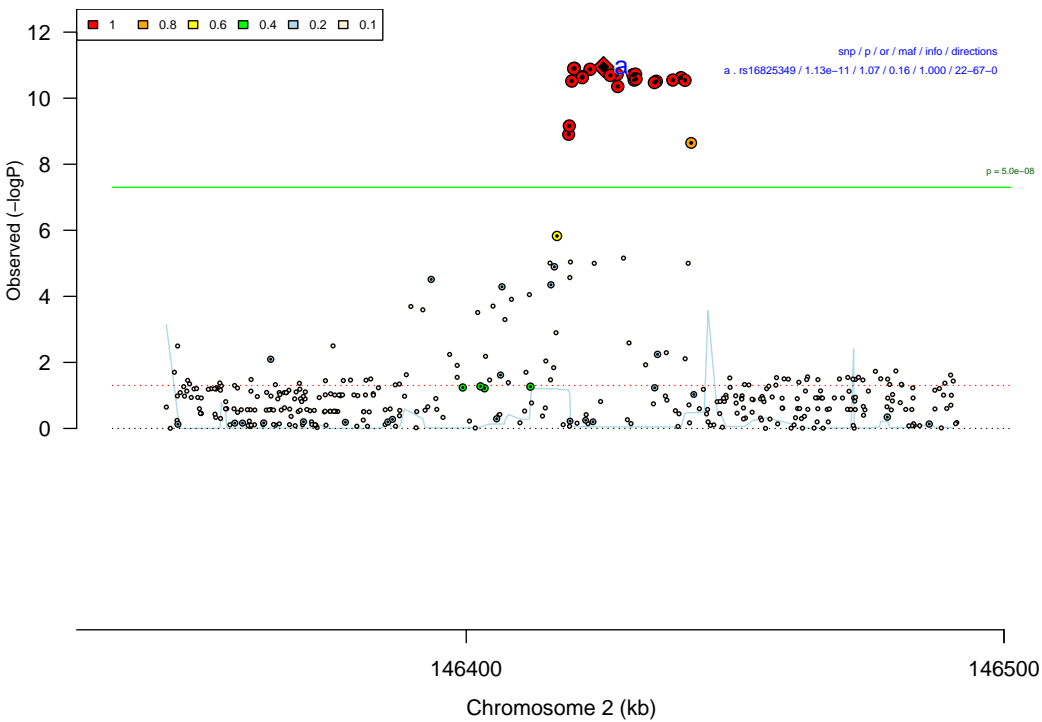

SCZ\_cond-rs16825349-chr2

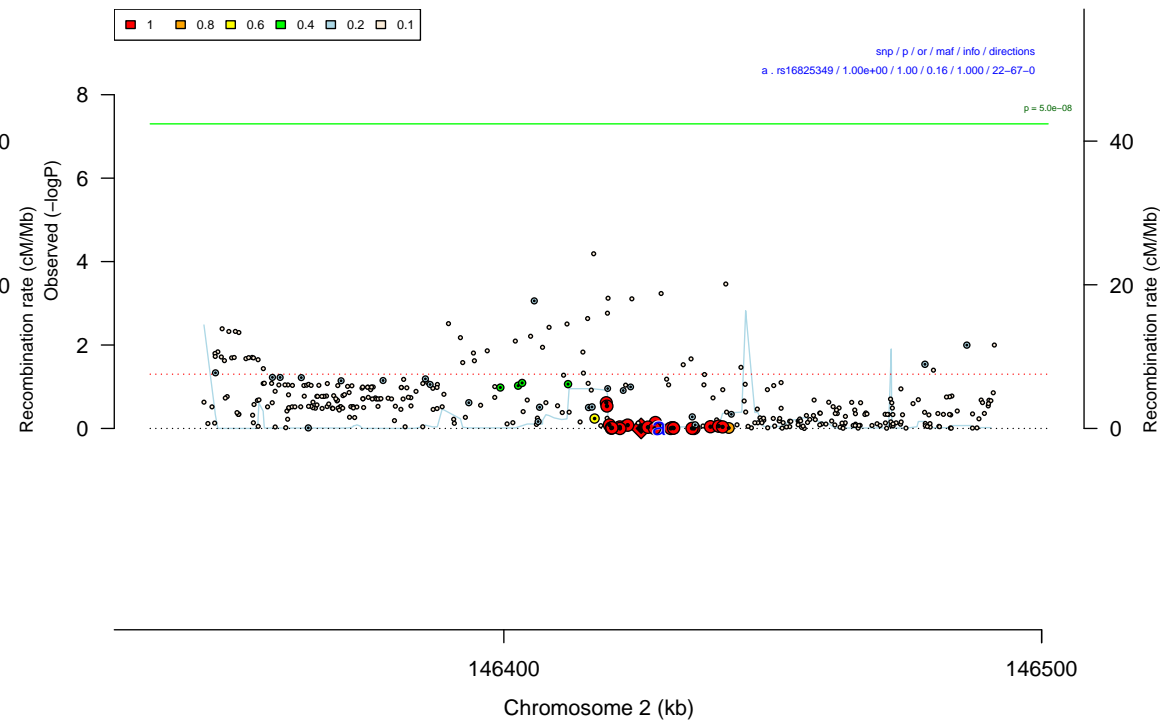

SCZ\_uncond-rs1440480-chr11

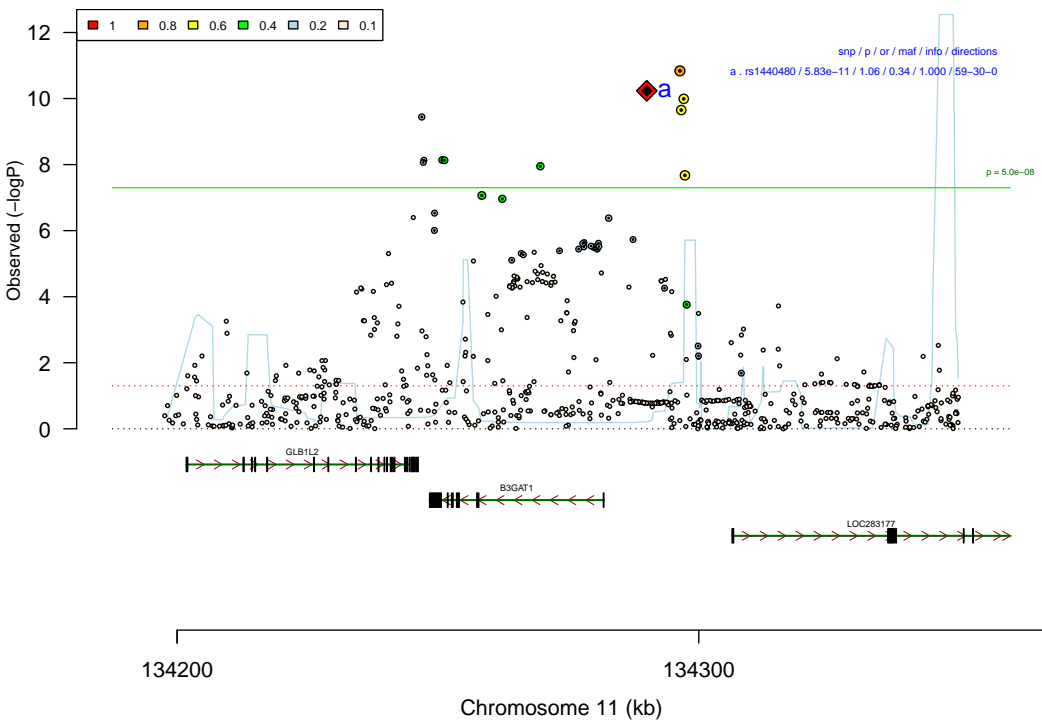

SCZ\_cond-rs1440480-chr11

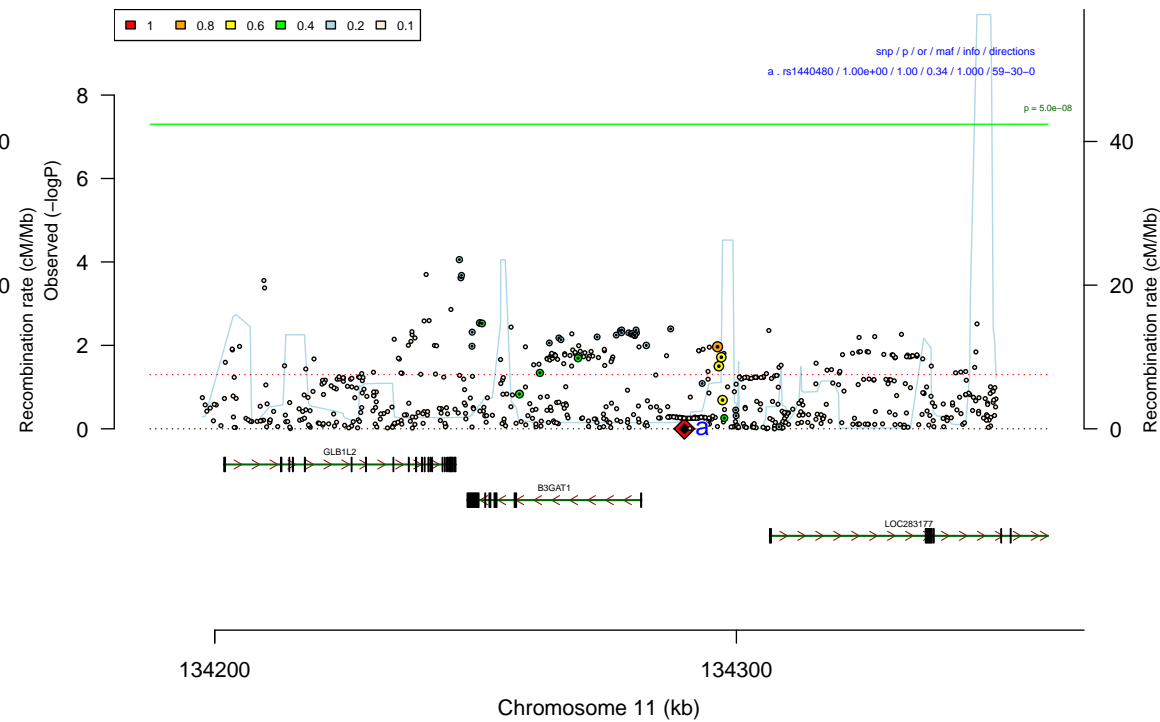

SCZ\_uncond-rs10117-chr5

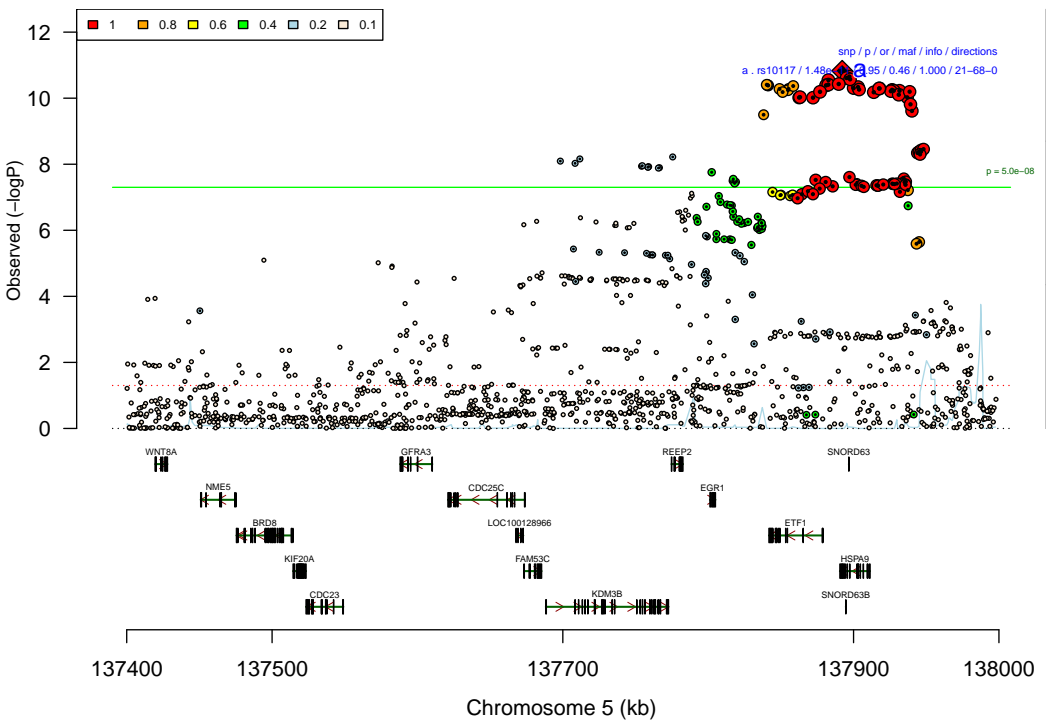

SCZ\_cond-rs10117-chr5

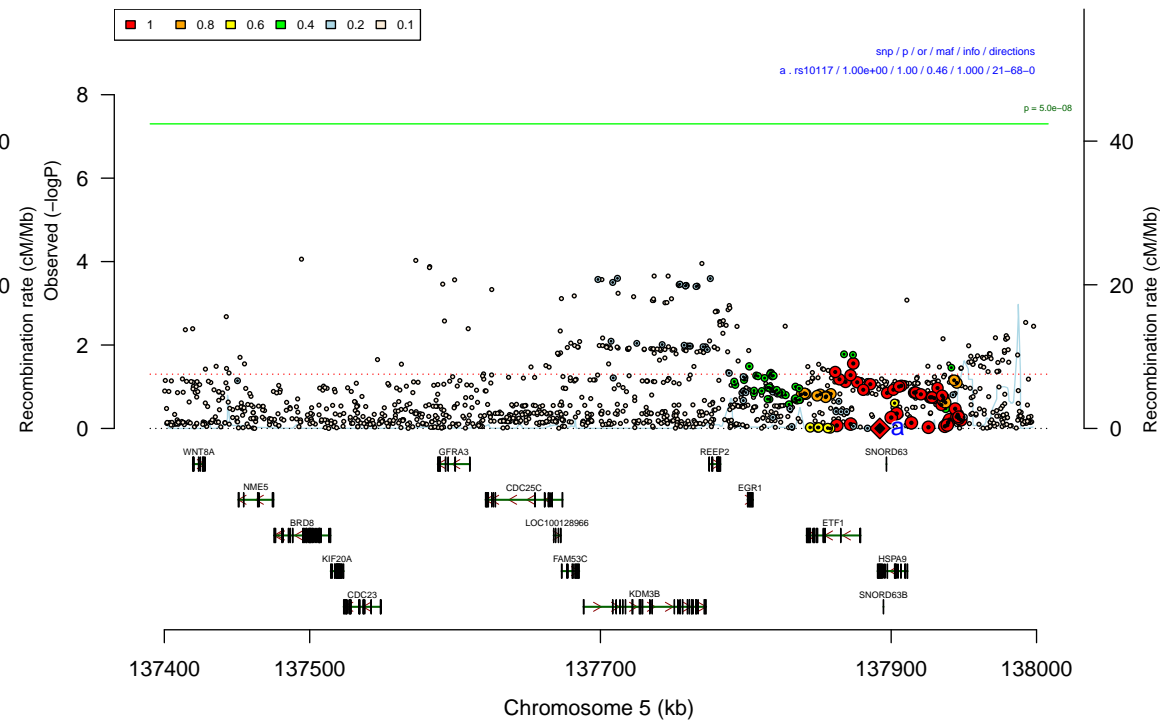

SCZ\_uncond-rs9304548-chr18

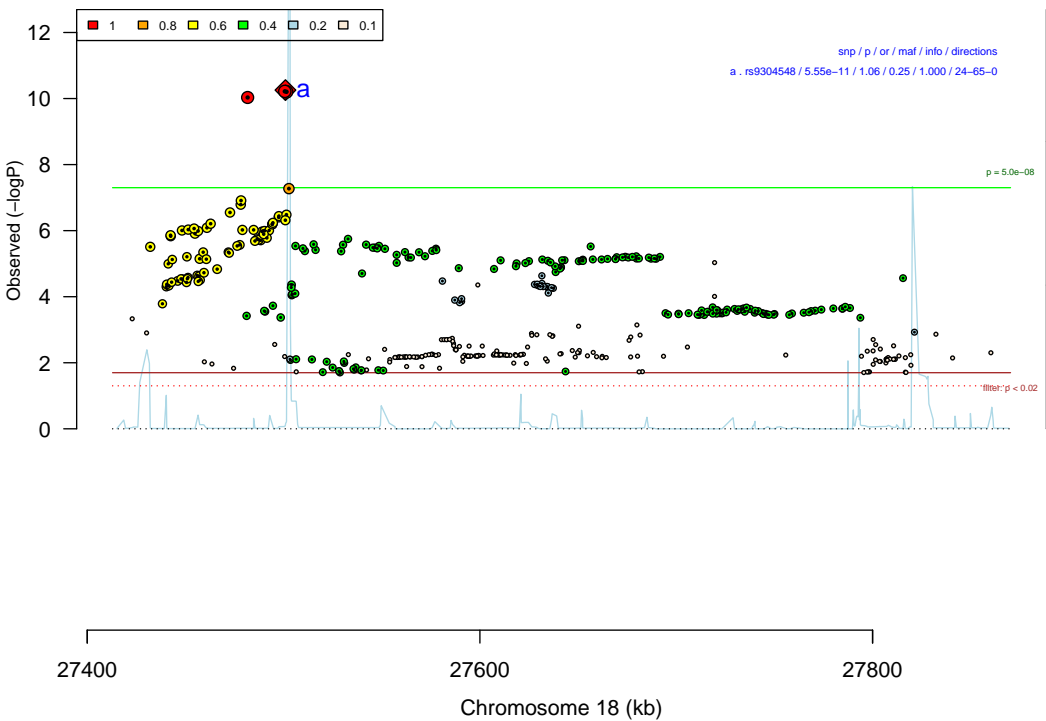

SCZ\_cond-rs9304548-chr18

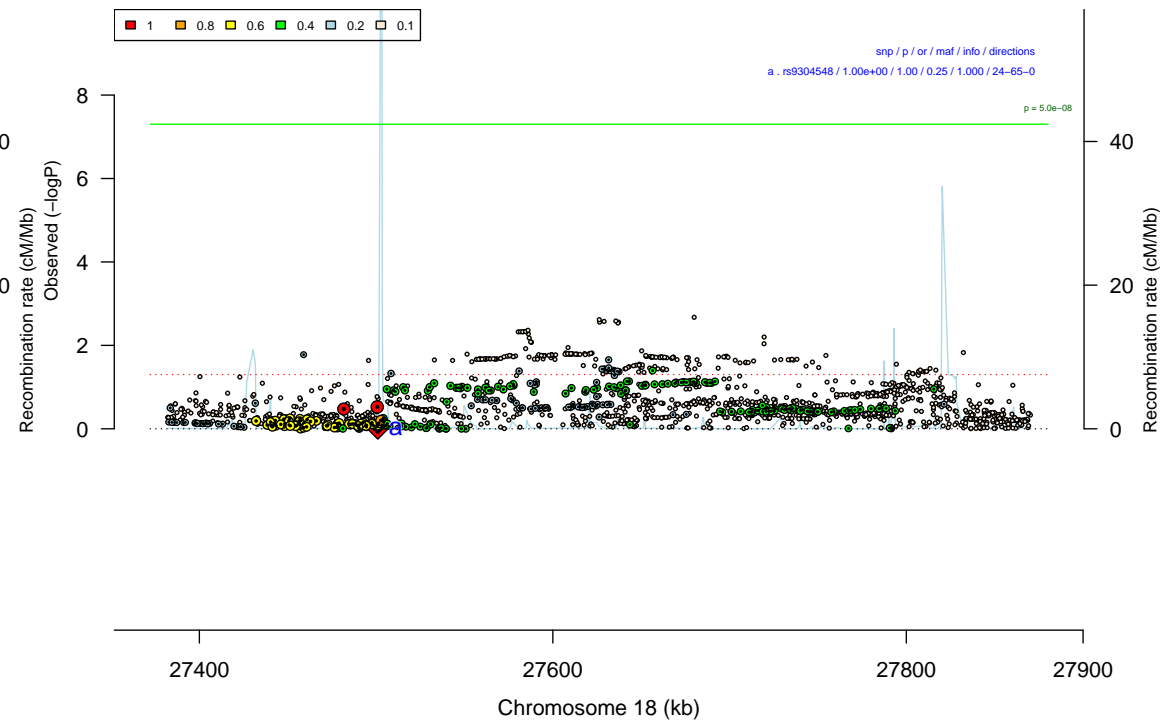



SCZ\_uncond-8:4180090\_T\_A-chr8

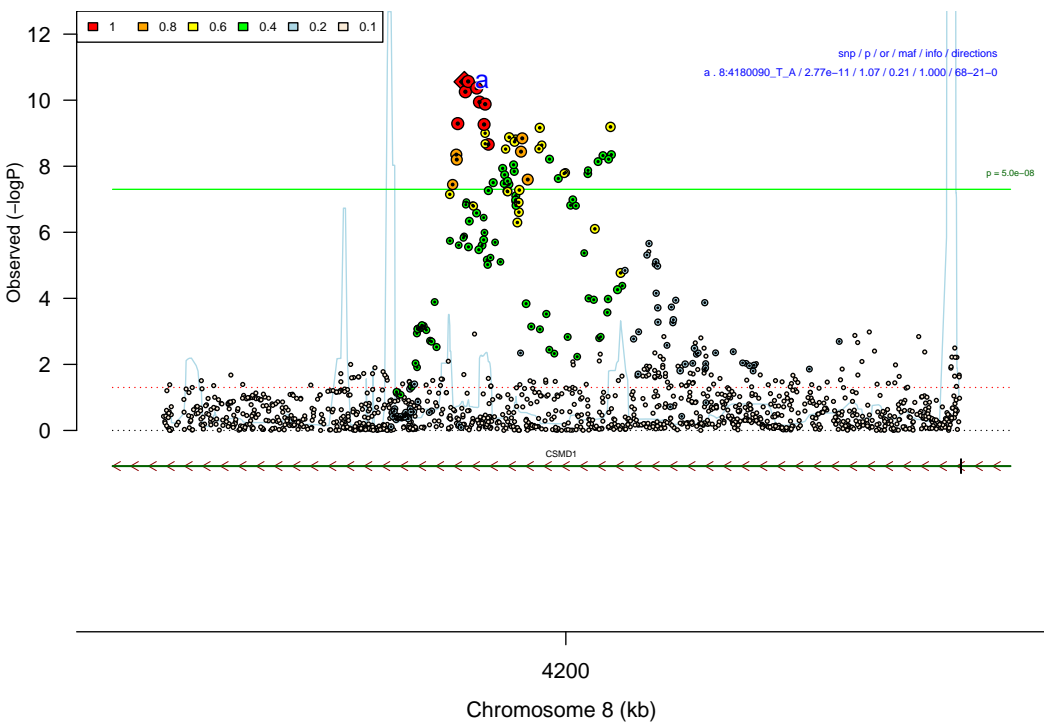

SCZ\_cond\_8:4180090\_T\_A-chr8

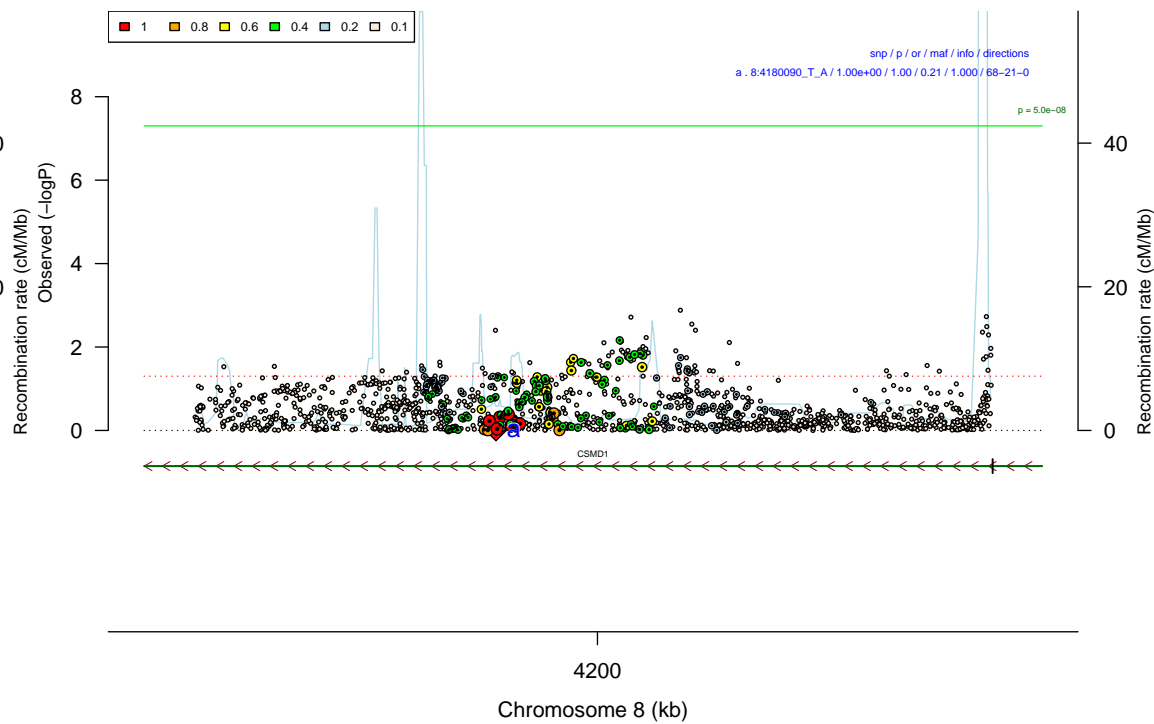

SCZ\_uncond-rs56205728-chr15

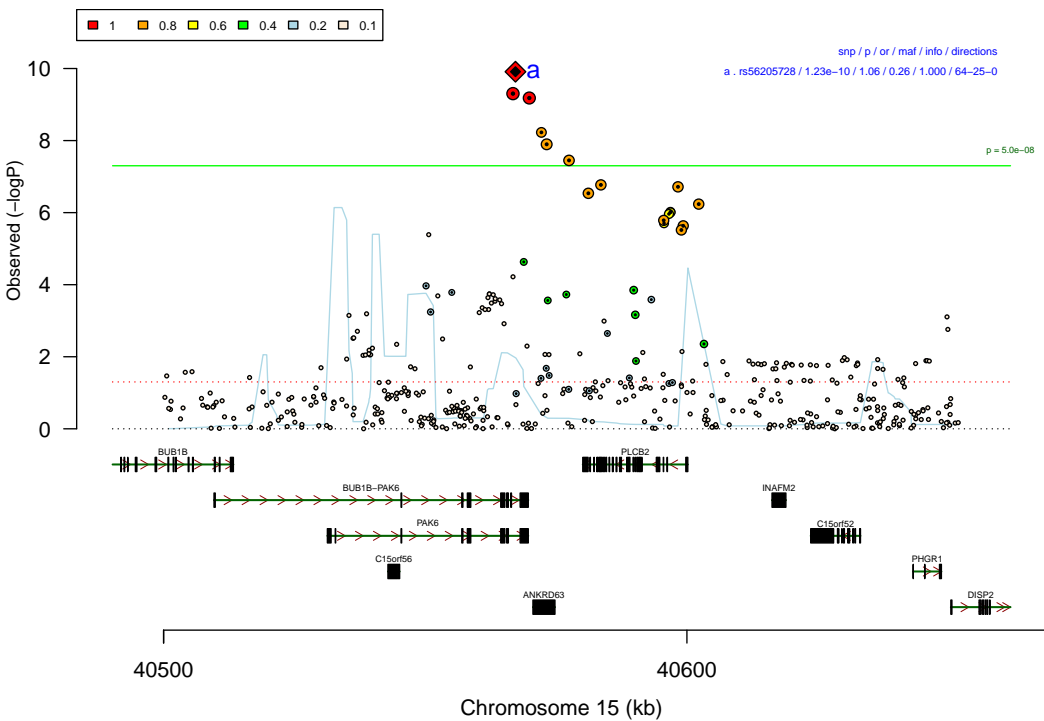

SCZ\_cond-rs56205728-chr15

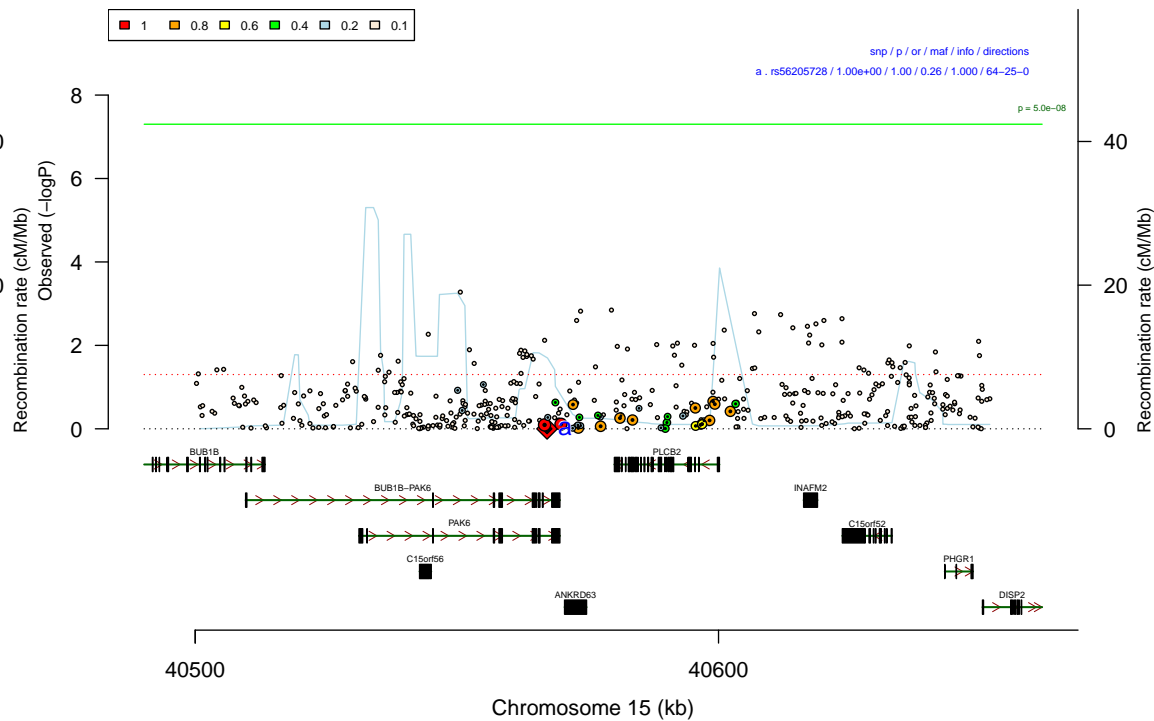

SCZ\_uncond-rs113113059-chr6

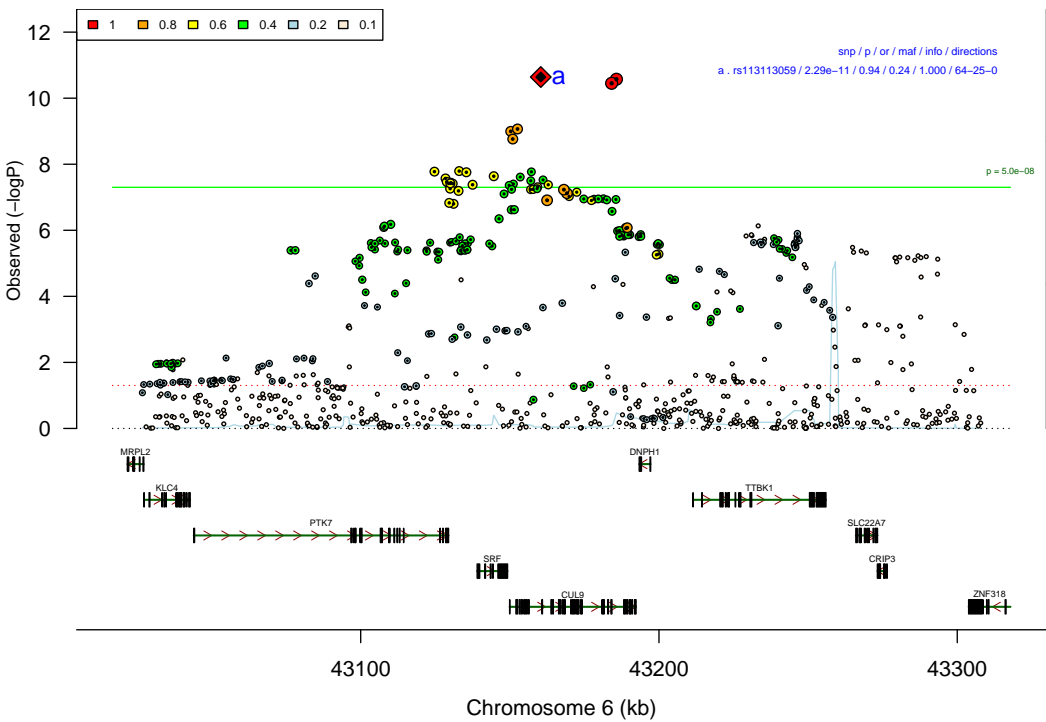

SCZ\_cond-rs113113059-chr6

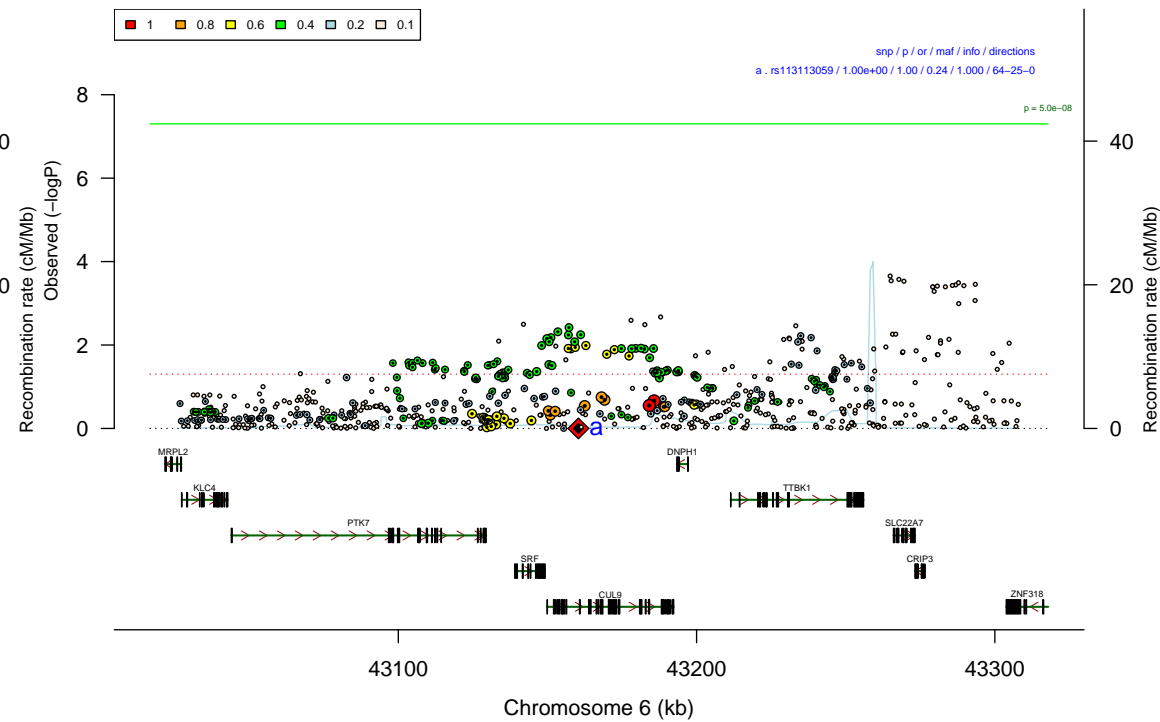

SCZ\_uncond-rs12943566-chr17

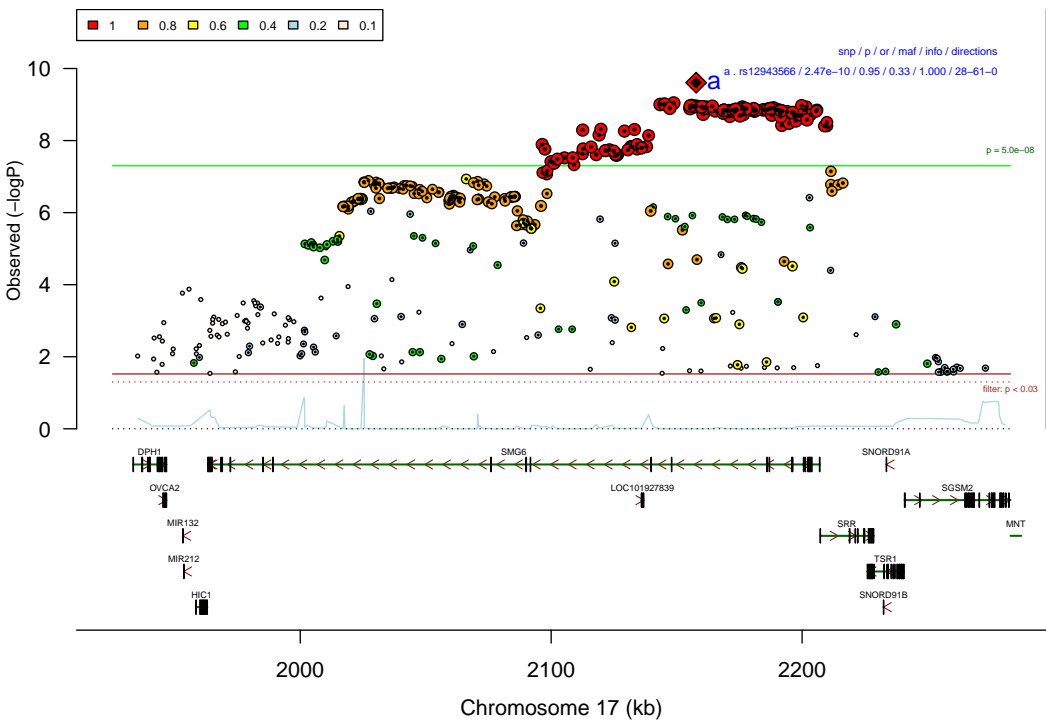

SCZ\_cond-rs12943566-chr17

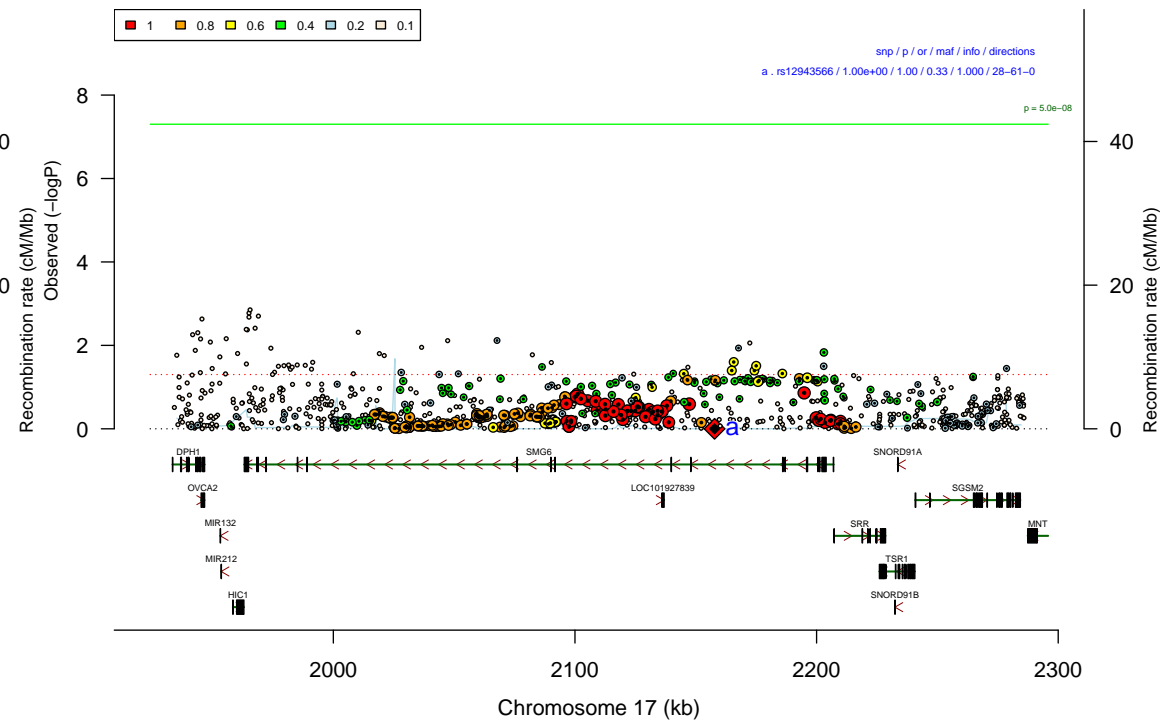

SCZ\_uncond-rs1454606-chr4

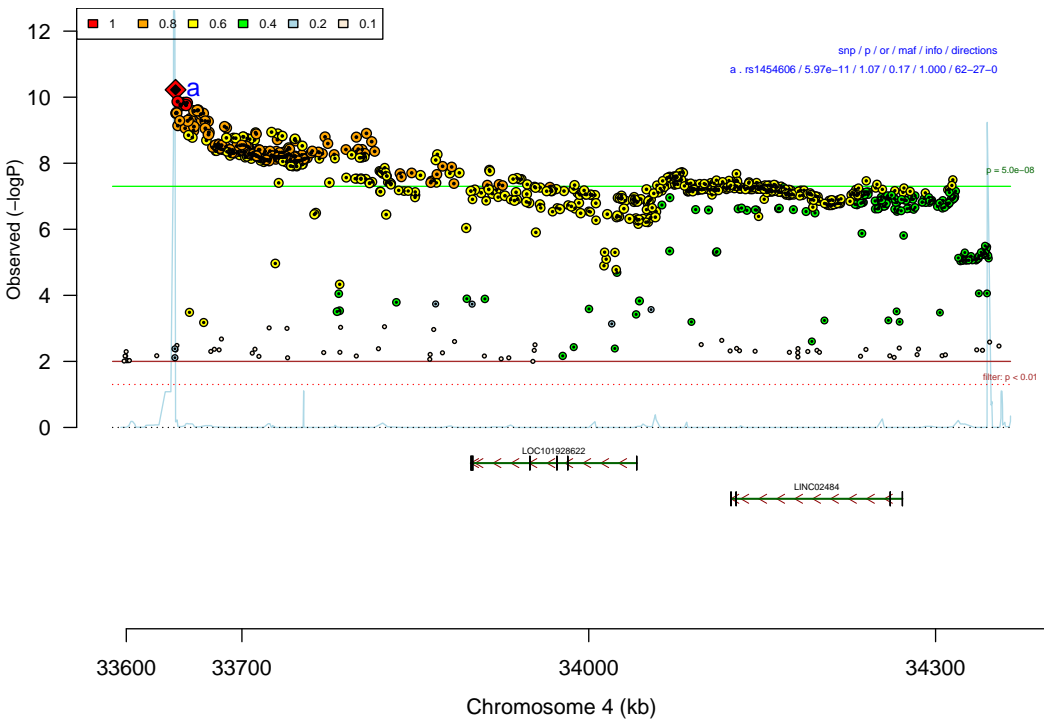

SCZ\_cond-rs1454606-chr4

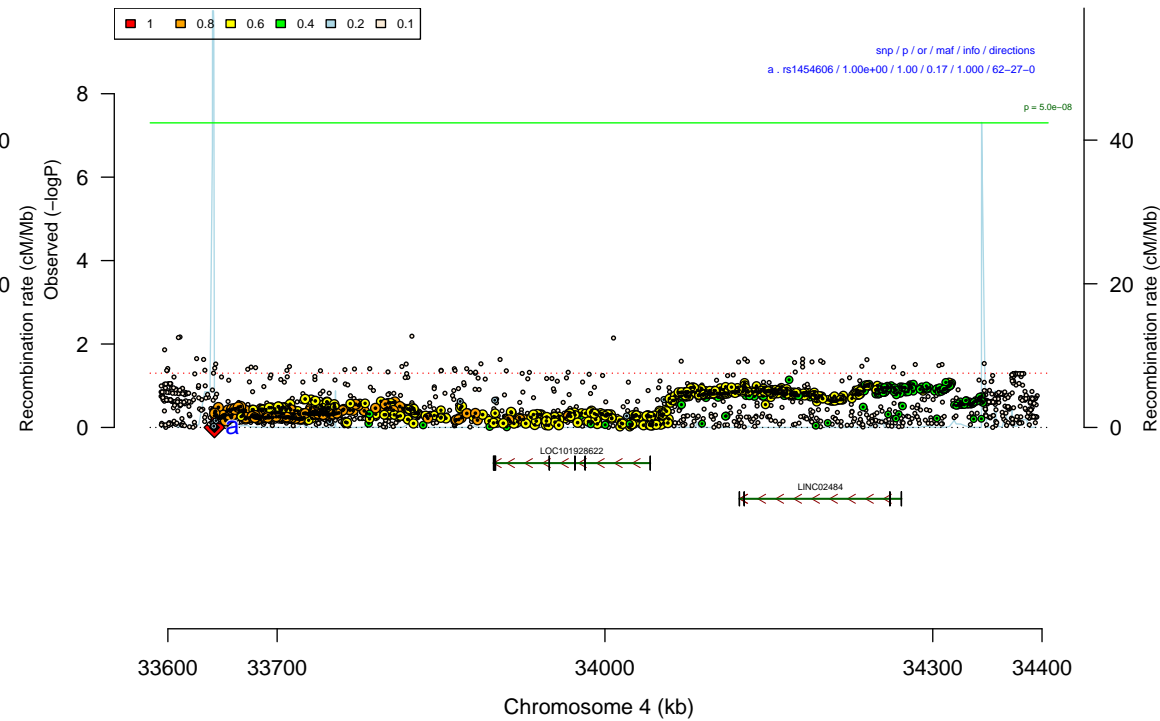

SCZ\_uncond-rs7312697-chr12

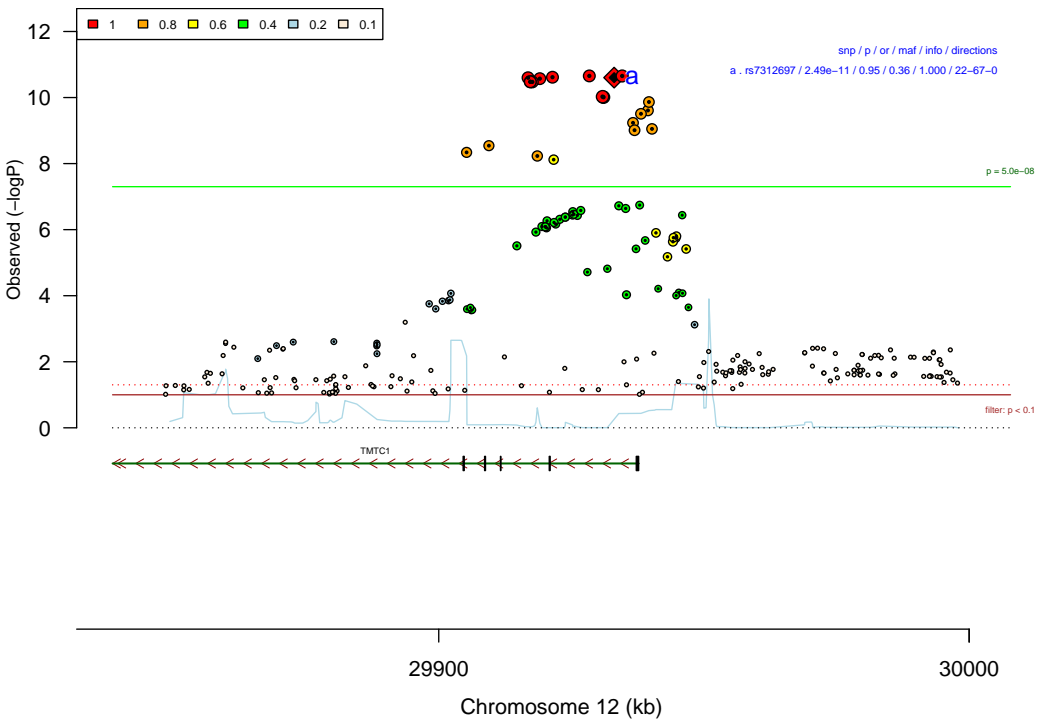

SCZ\_cond-rs7312697-chr12

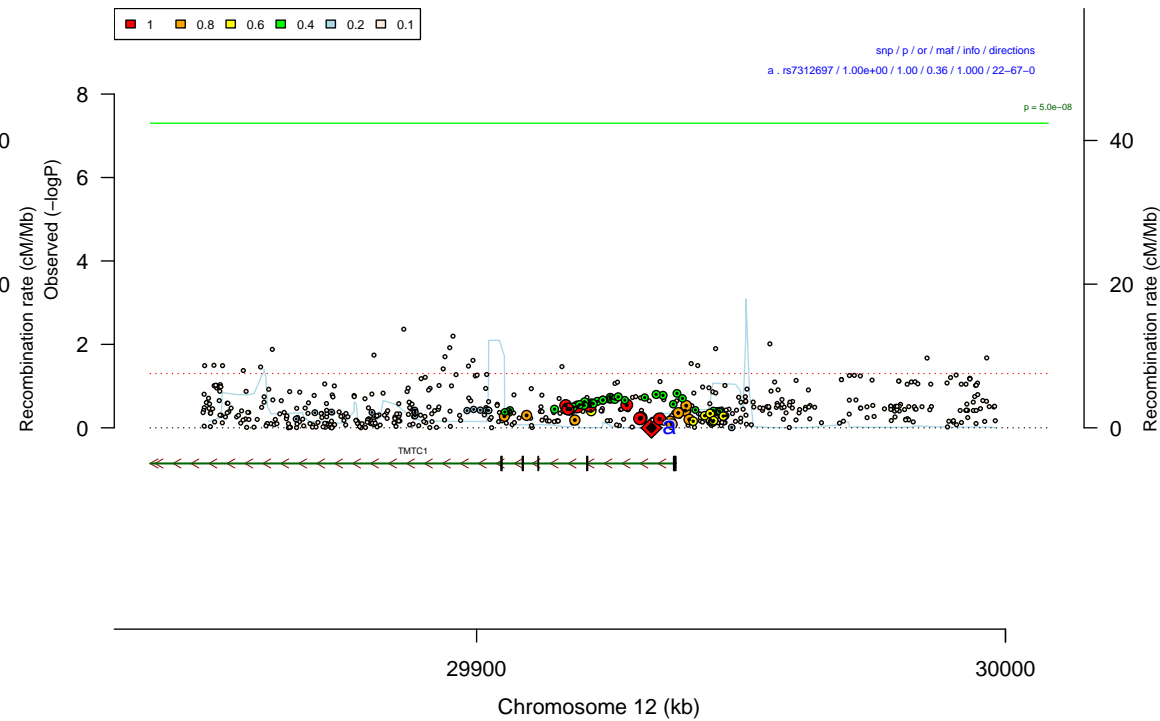

SCZ\_uncond-rs505061-chr9

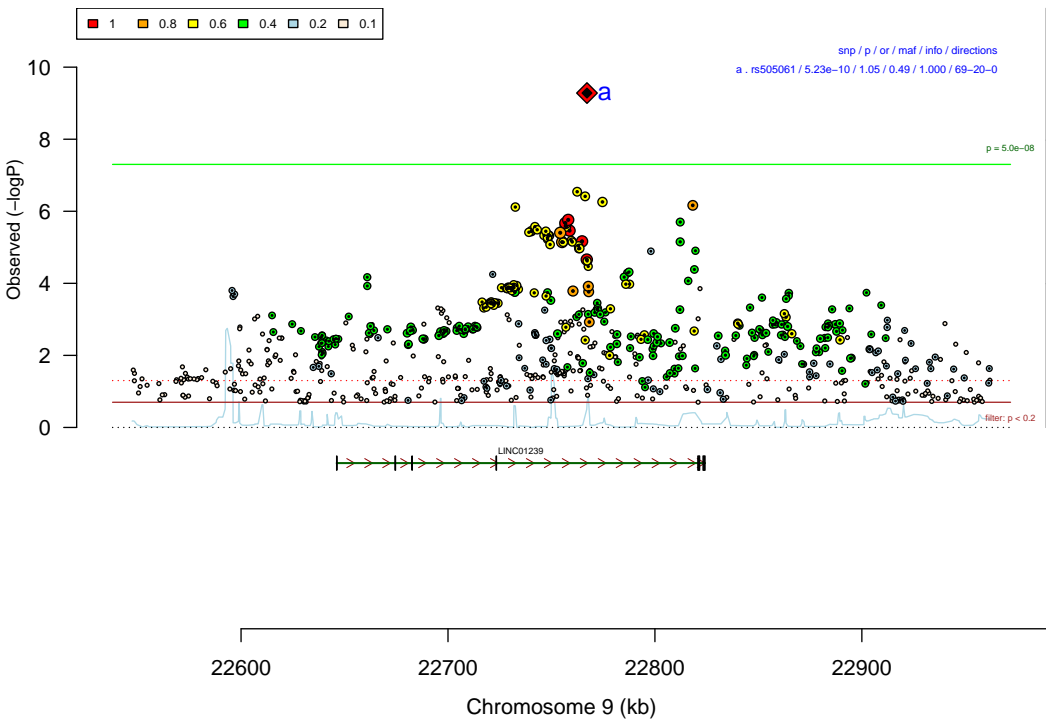

SCZ\_cond-rs505061-chr9

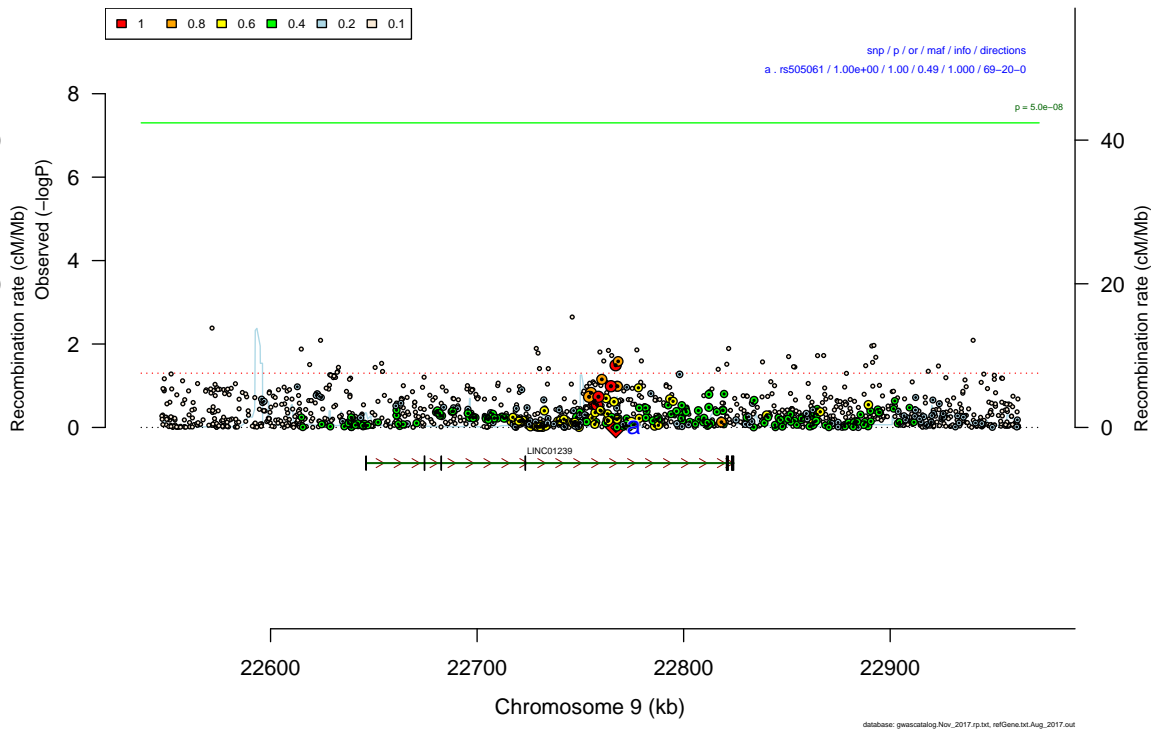

SCZ\_uncond-rs3770752-chr2

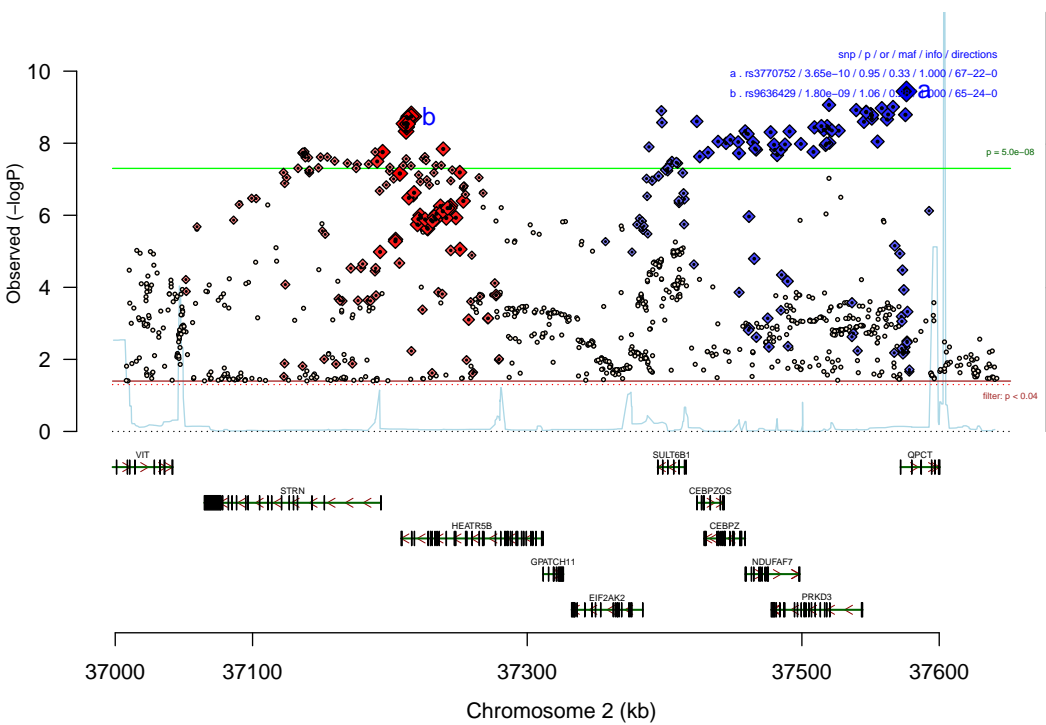

SCZ\_cond\_rs3770752-chr2

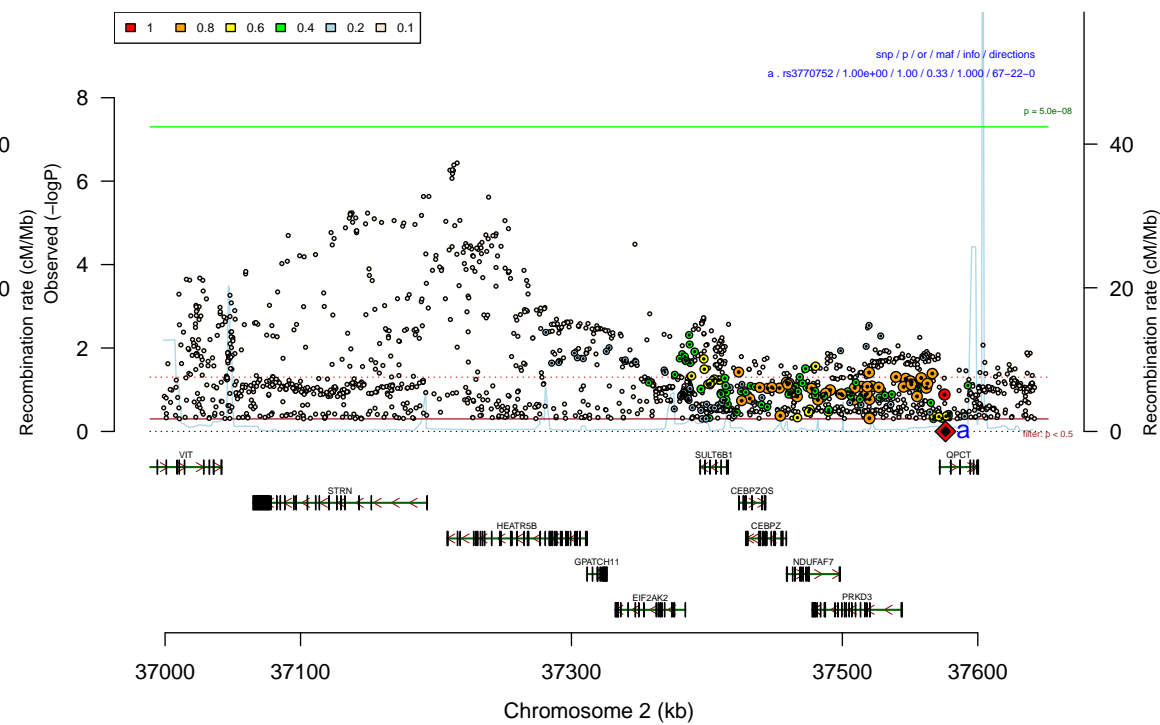

SCZ\_cond\_rs3770752-rs9636429-chr2

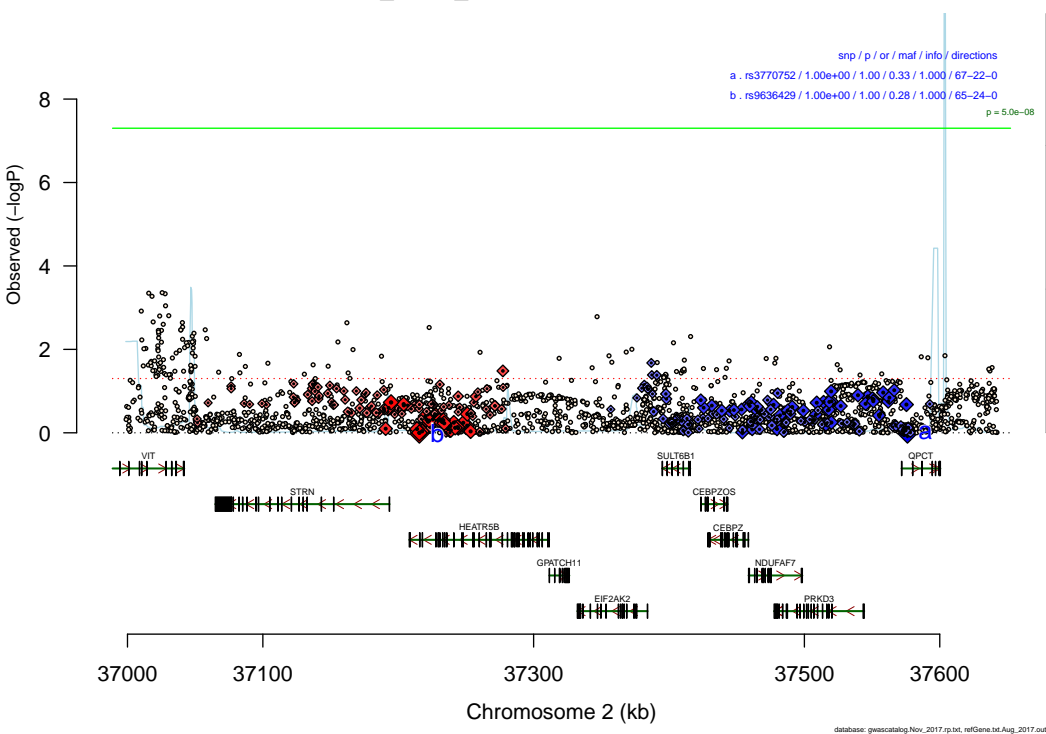

SCZ\_uncond-rs61405217-chr4

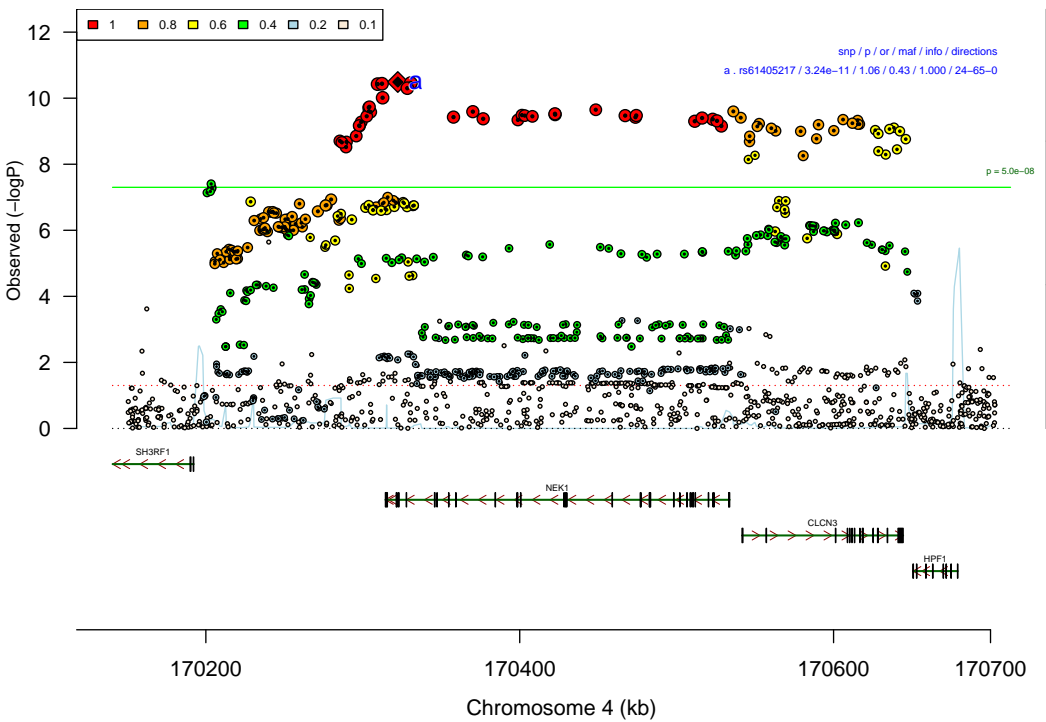

SCZ\_cond-rs61405217-chr4

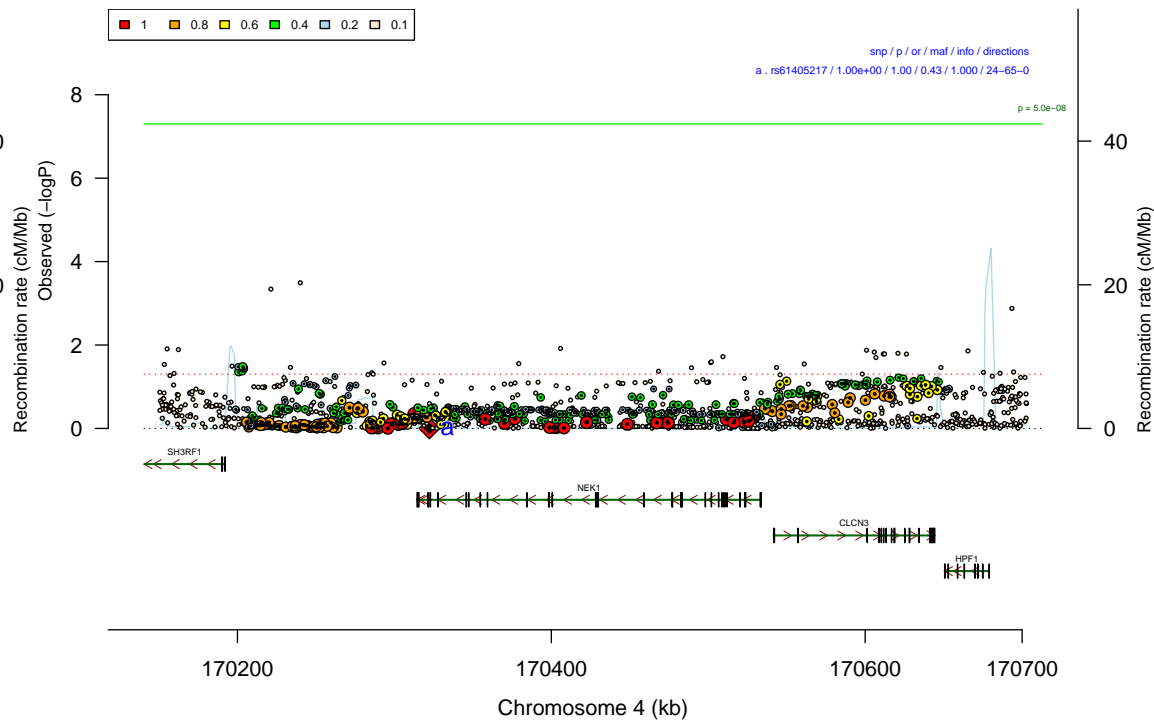

SCZ\_uncond-rs77502336-chr11

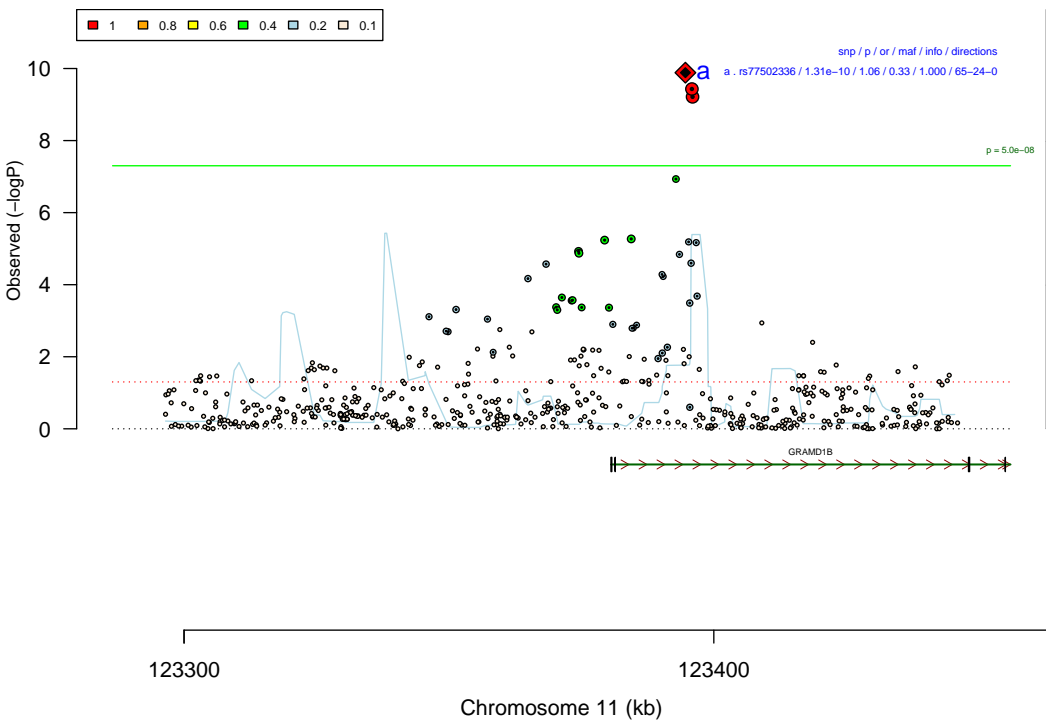

SCZ\_cond-rs77502336-chr11

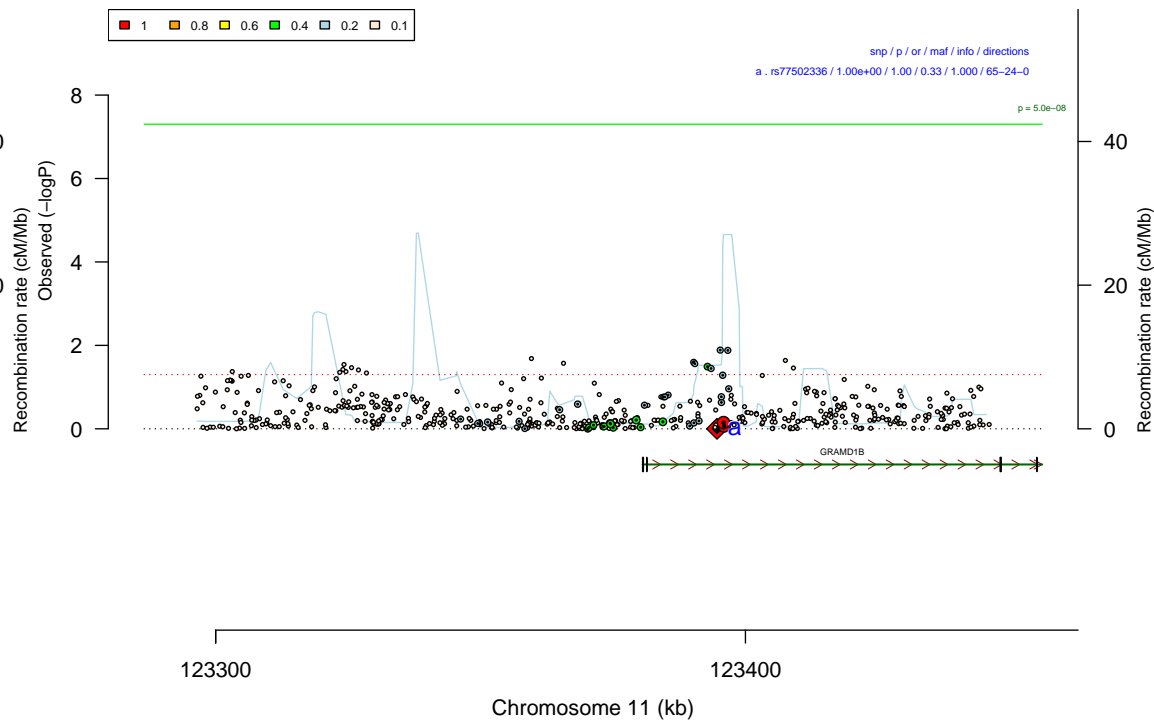

SCZ\_uncond-rs9597388-chr13

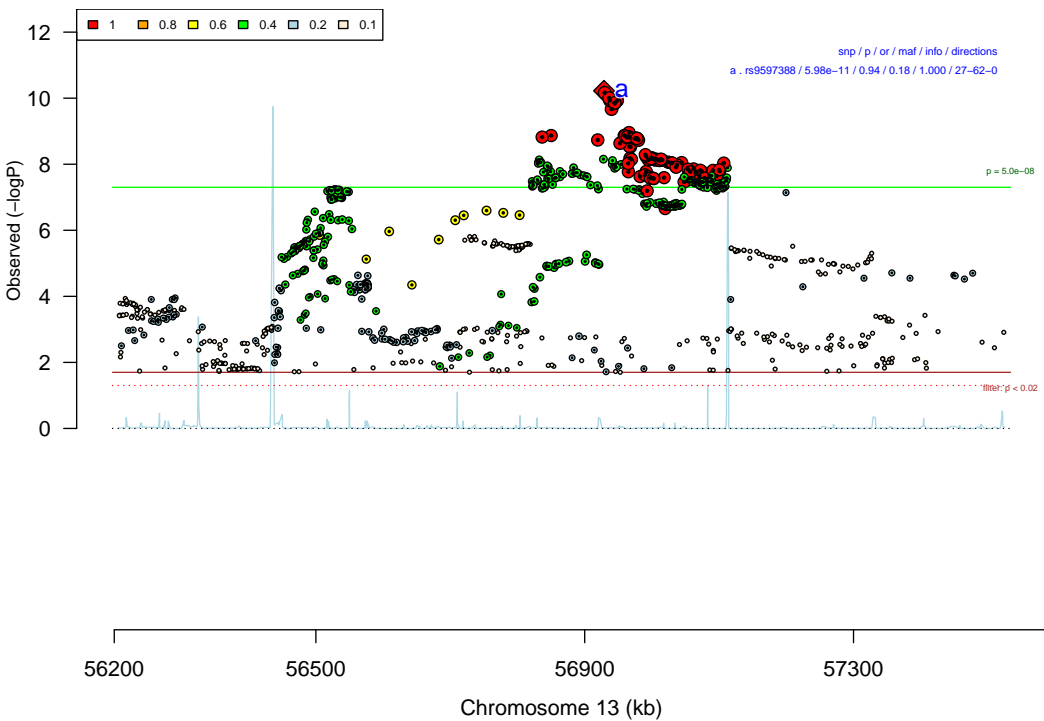

SCZ\_cond-rs9597388-chr13

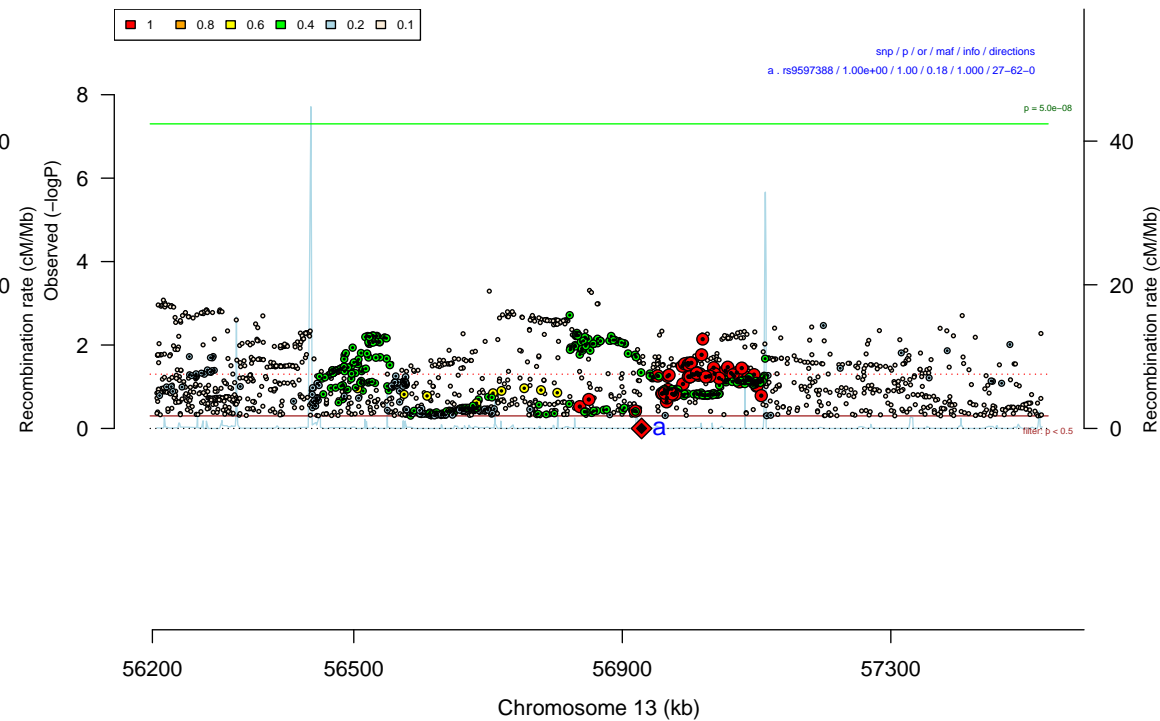

SCZ\_uncond-rs6732355-chr2

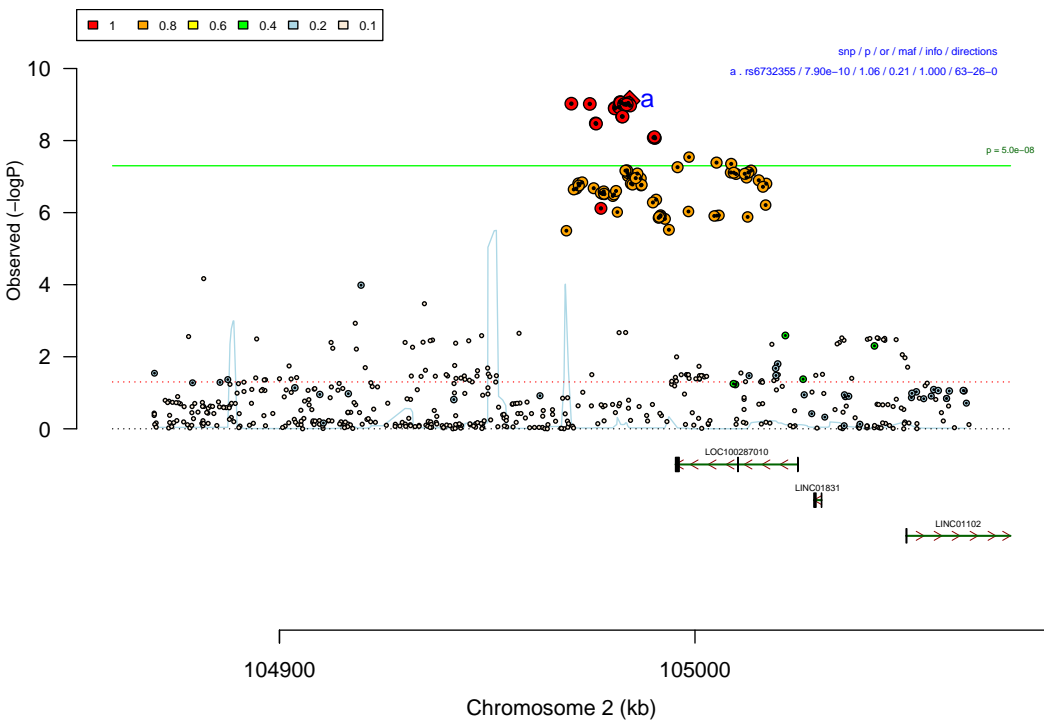

SCZ\_cond-rs6732355-chr2

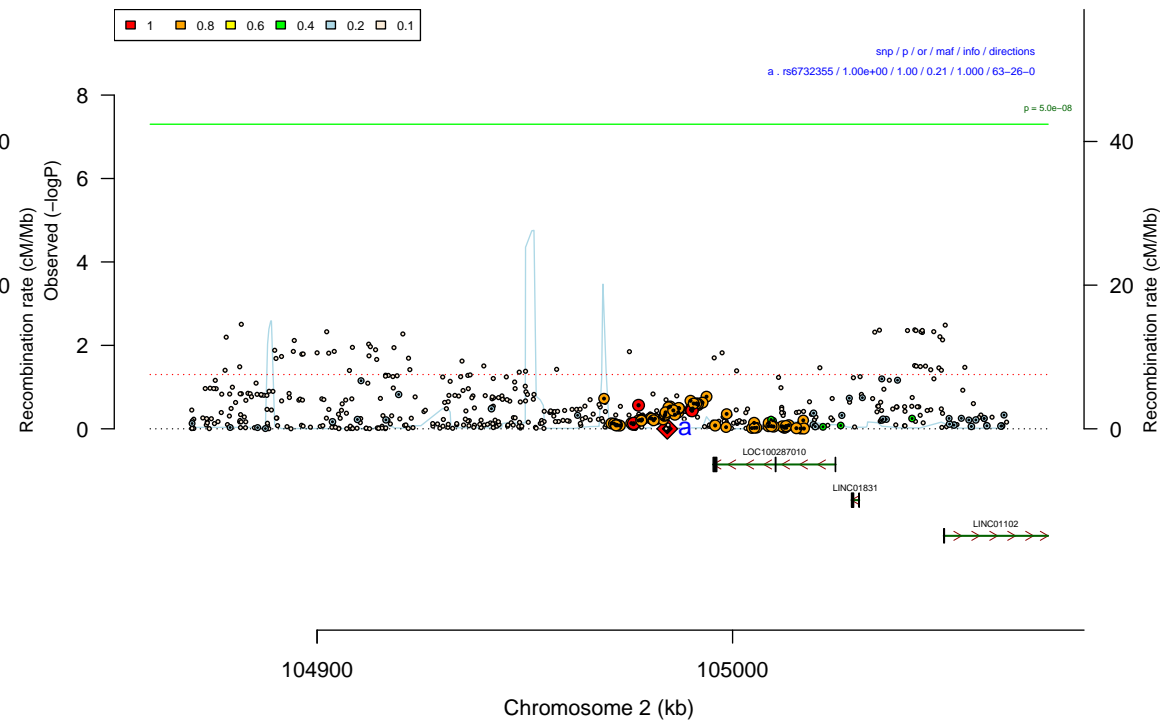

SCZ\_uncond-rs4937935-chr11

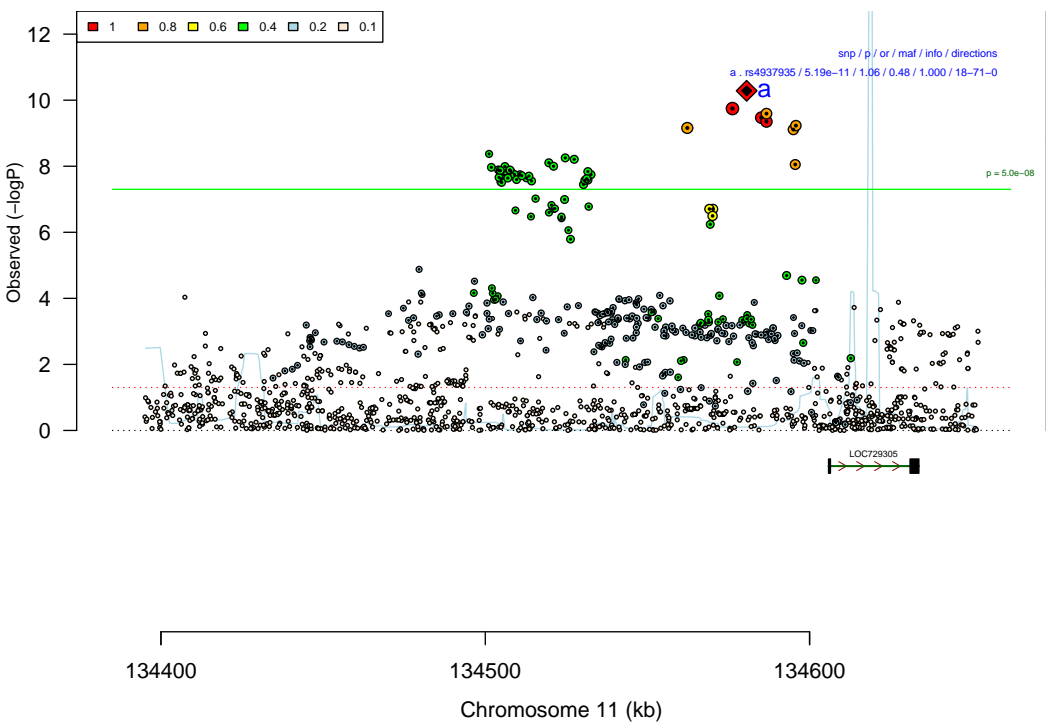

SCZ\_cond-rs4937935-chr11

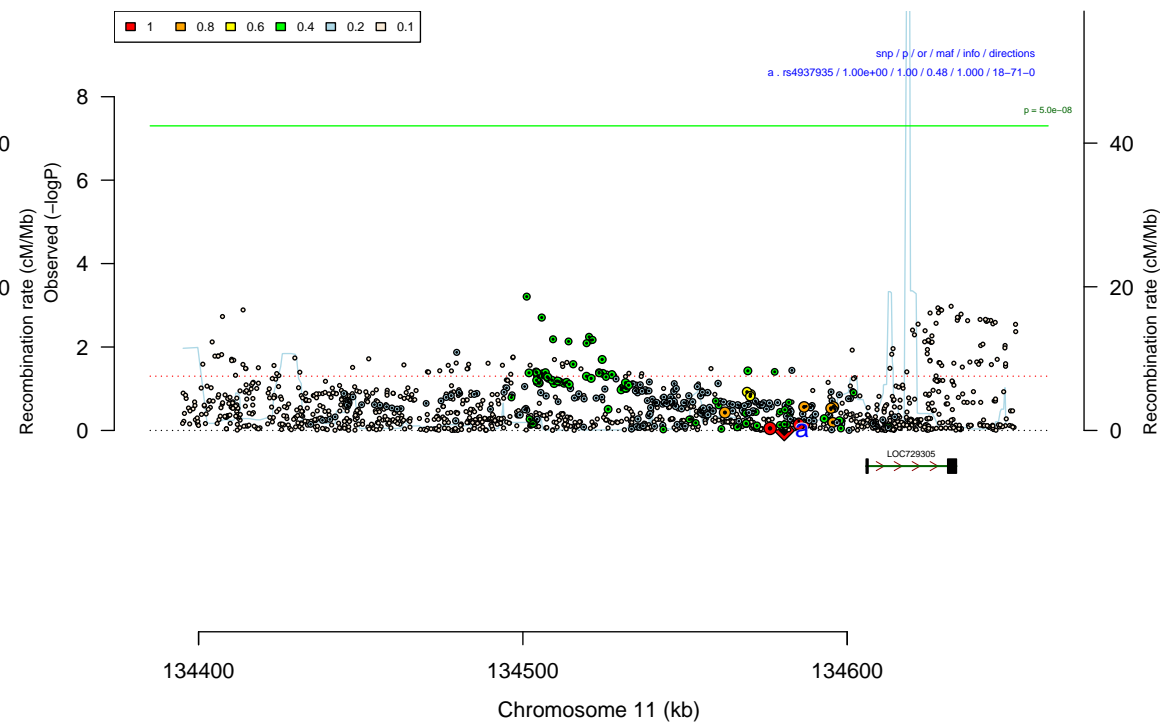

SCZ\_uncond-rs4793888-chr17

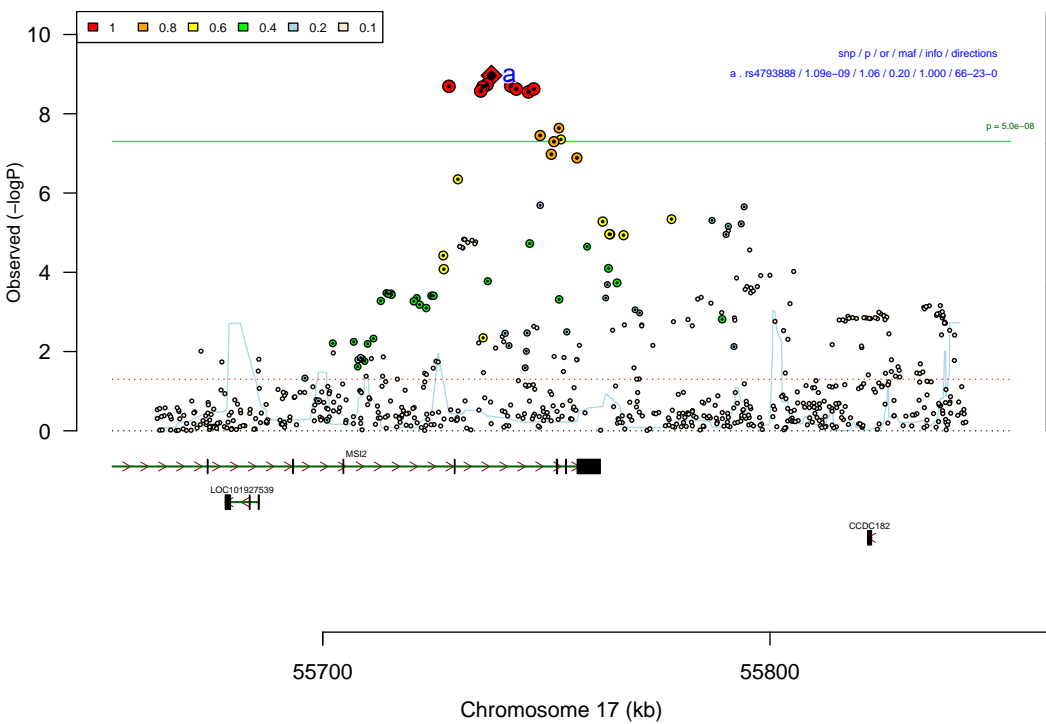

SCZ\_cond-rs4793888-chr17

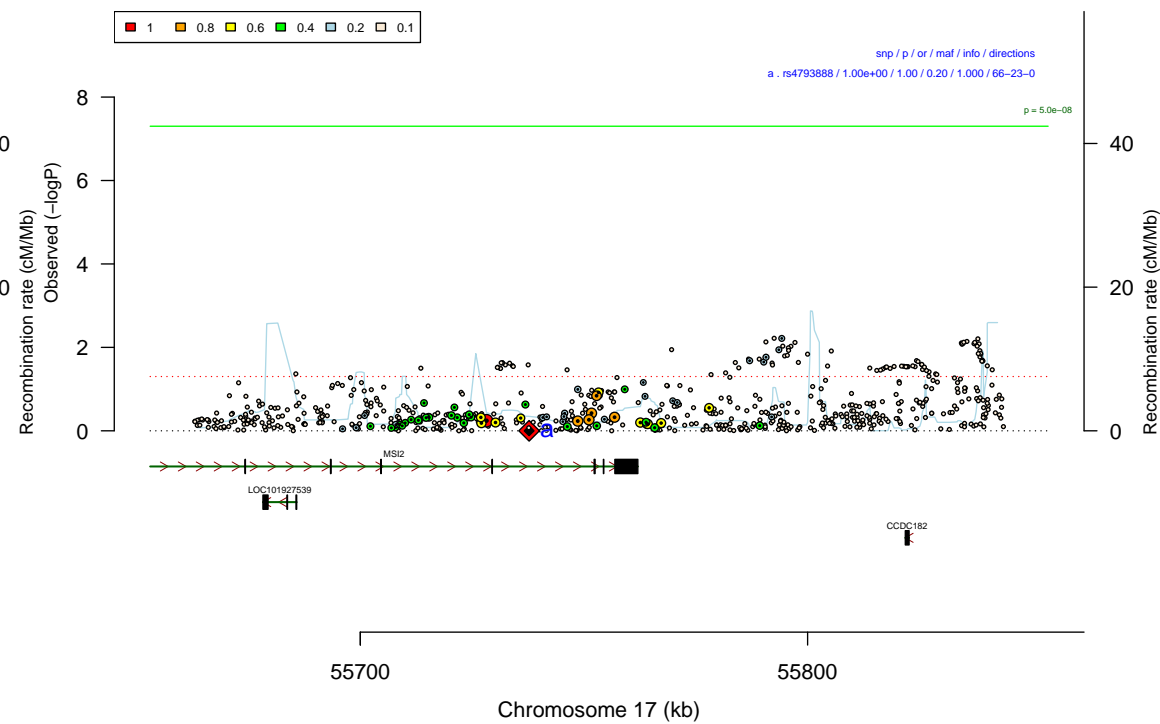



SCZ\_uncond-rs35164357-chr5

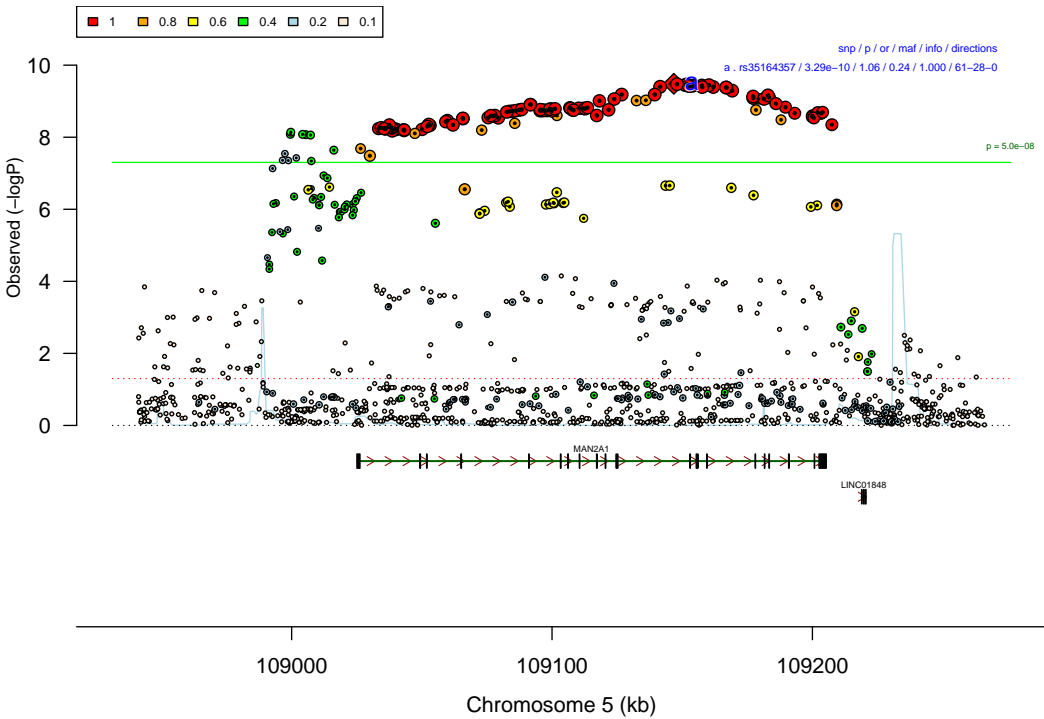

SCZ\_cond-rs35164357-chr5

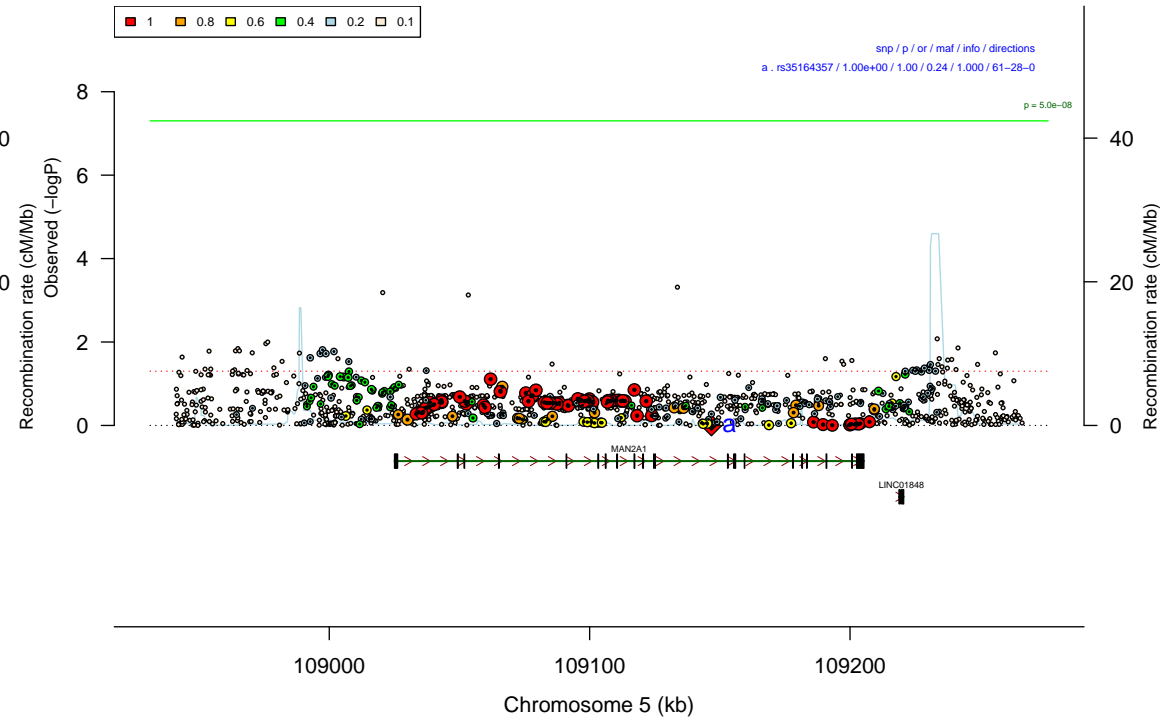

SCZ\_uncond-rs10086619-chr8

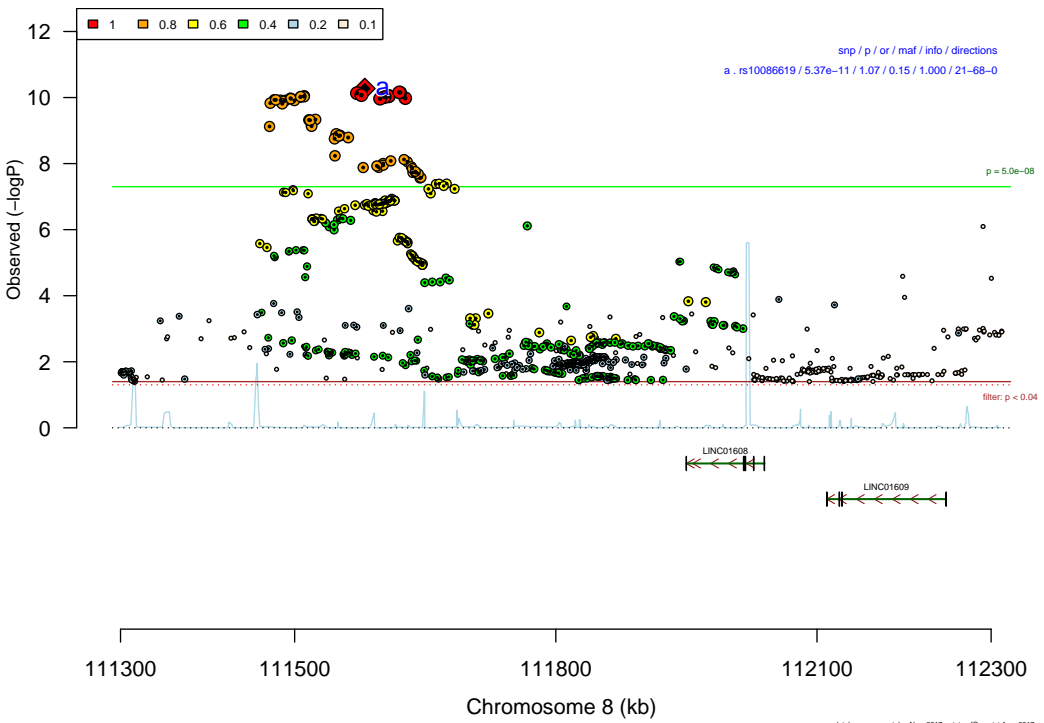

SCZ\_cond-rs10086619-chr8

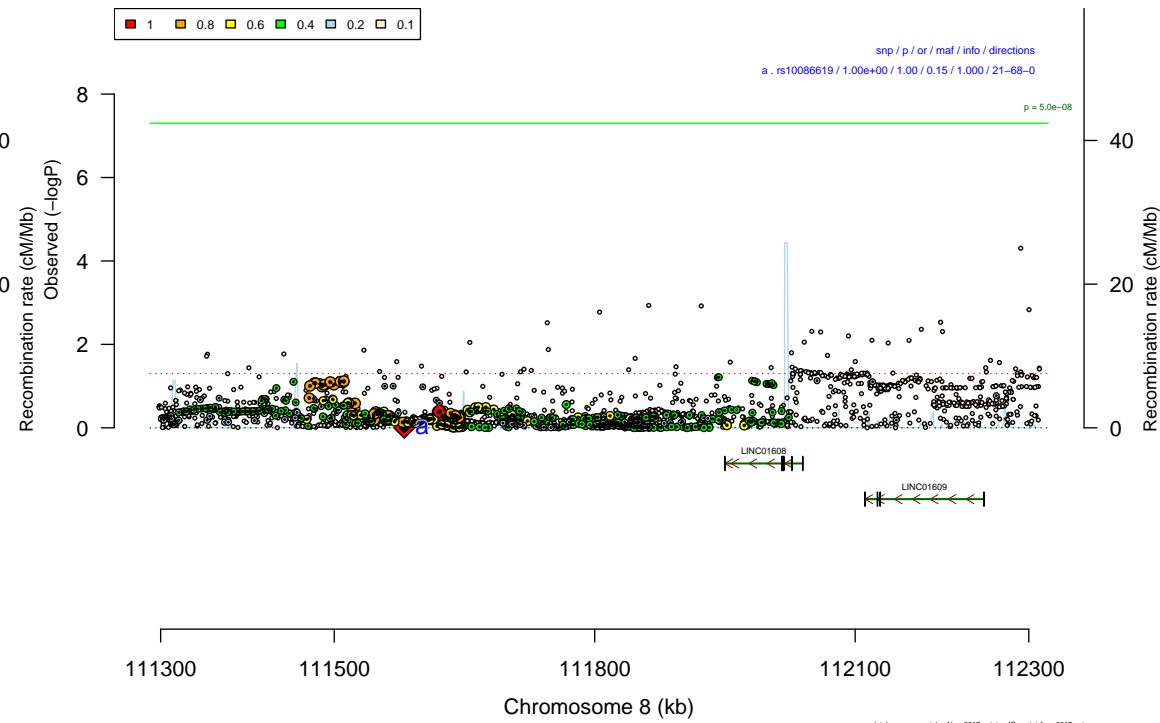

SCZ\_uncond-rs1593304-chr7

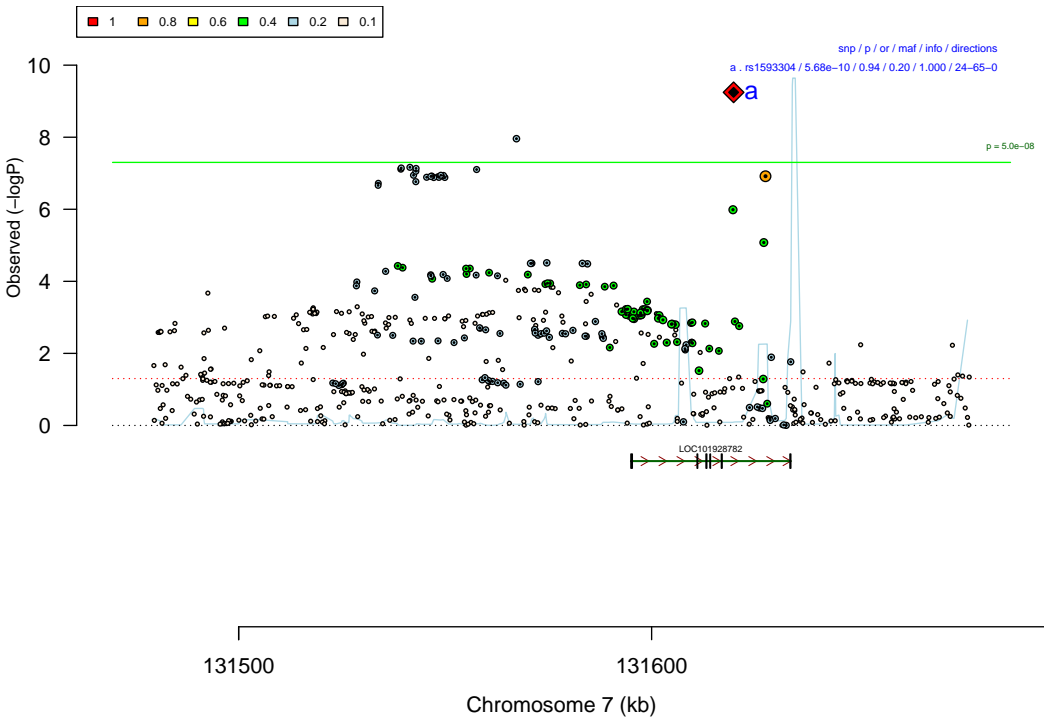

SCZ\_cond-rs1593304-chr7

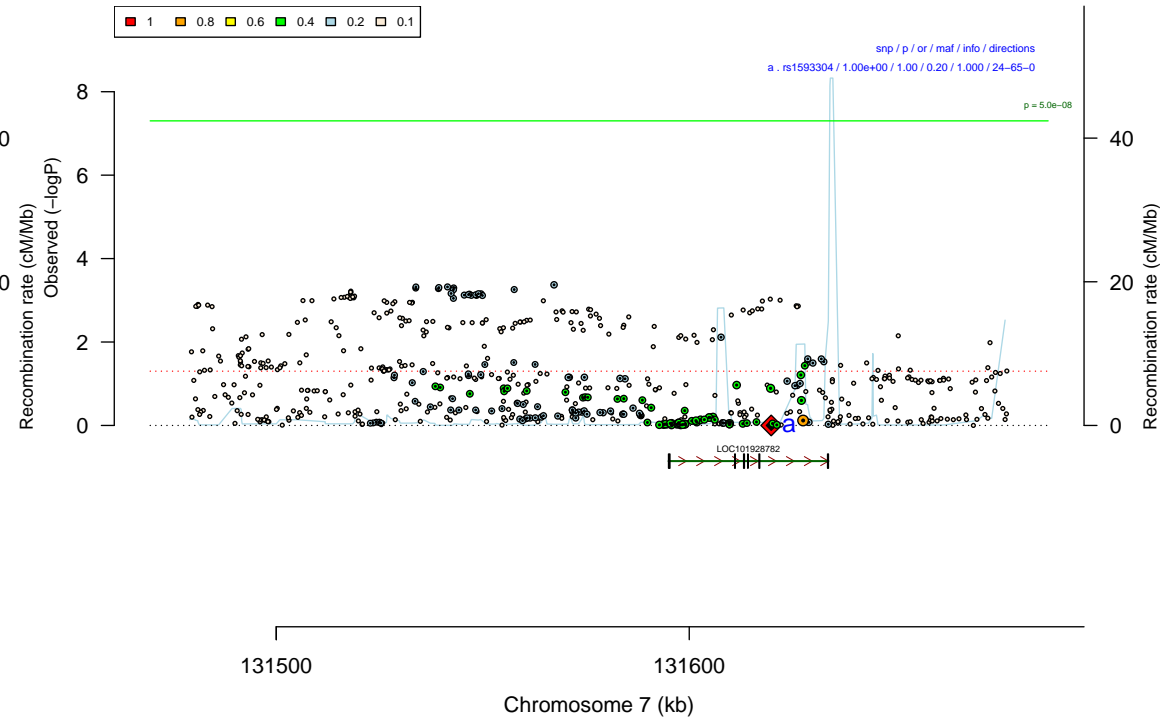

SCZ\_uncond-rs2238304-chr15

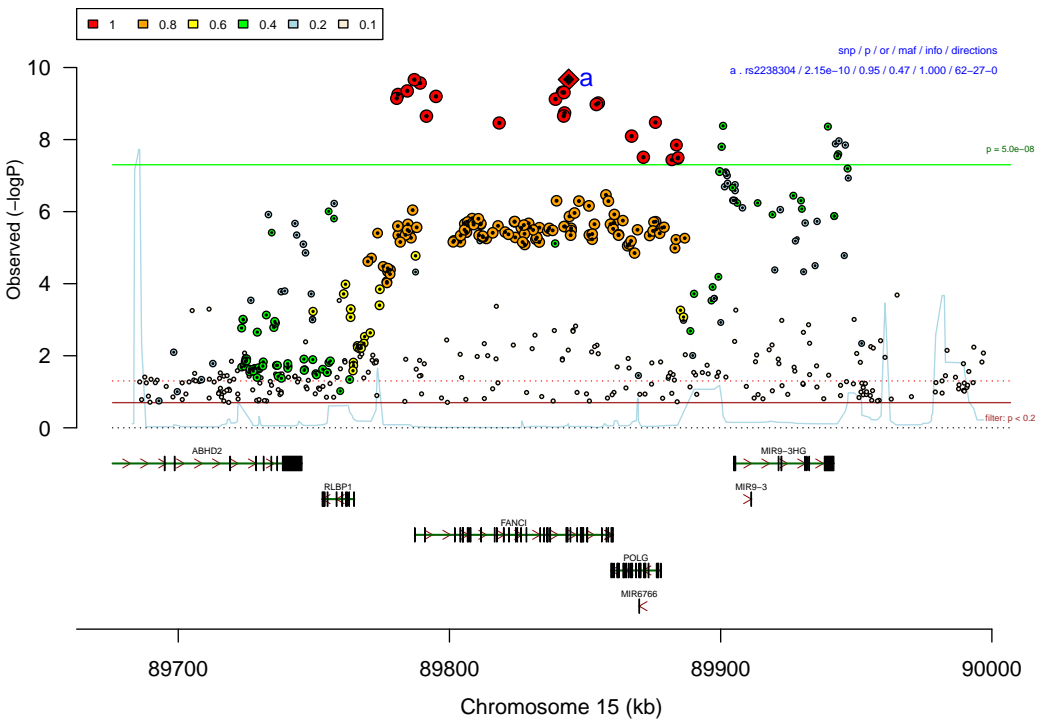

SCZ\_cond-rs2238304-chr15

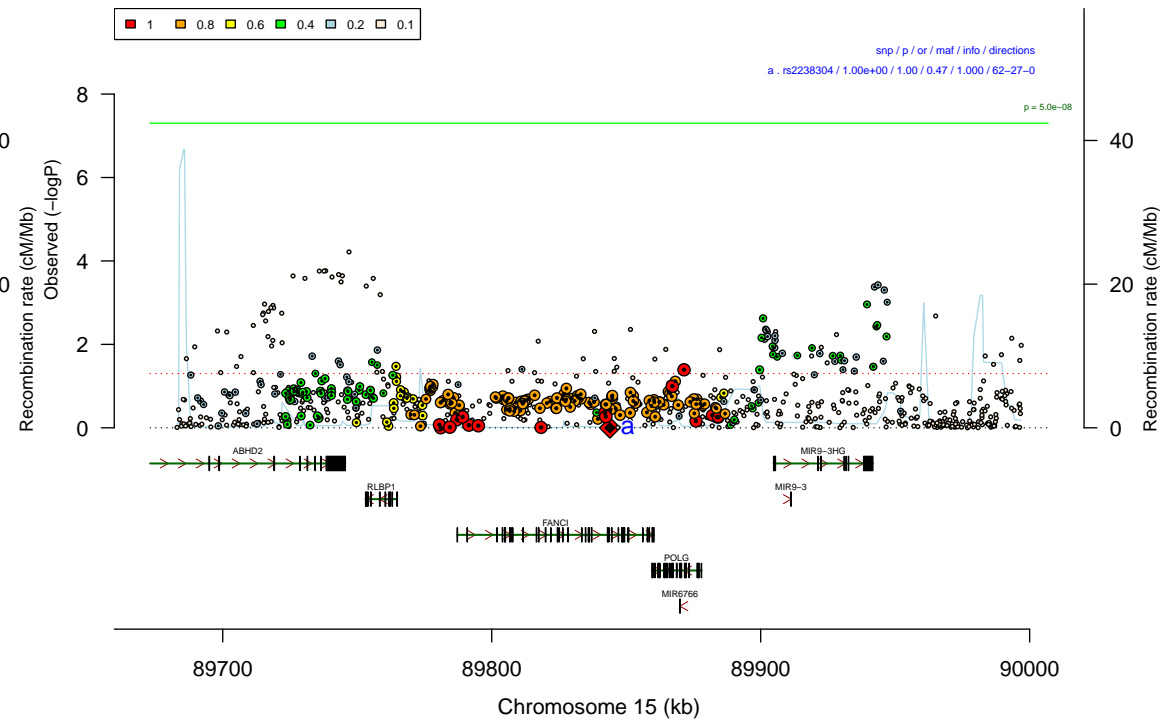

SCZ\_uncond-rs2532240-chr17

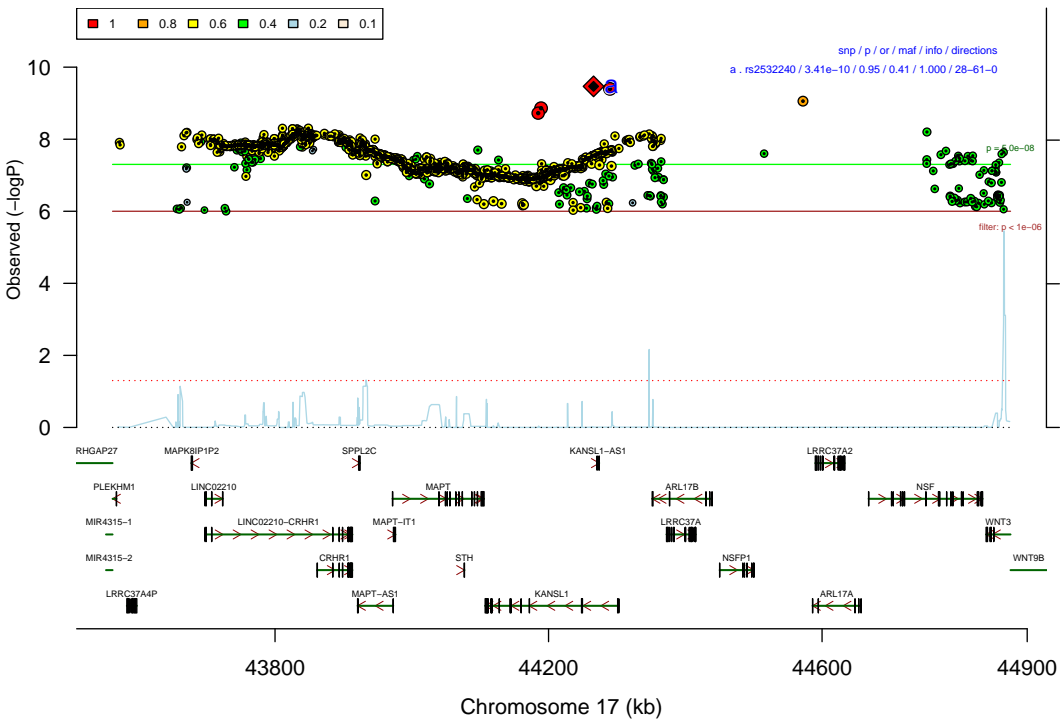

SCZ\_cond-rs2532240-chr17

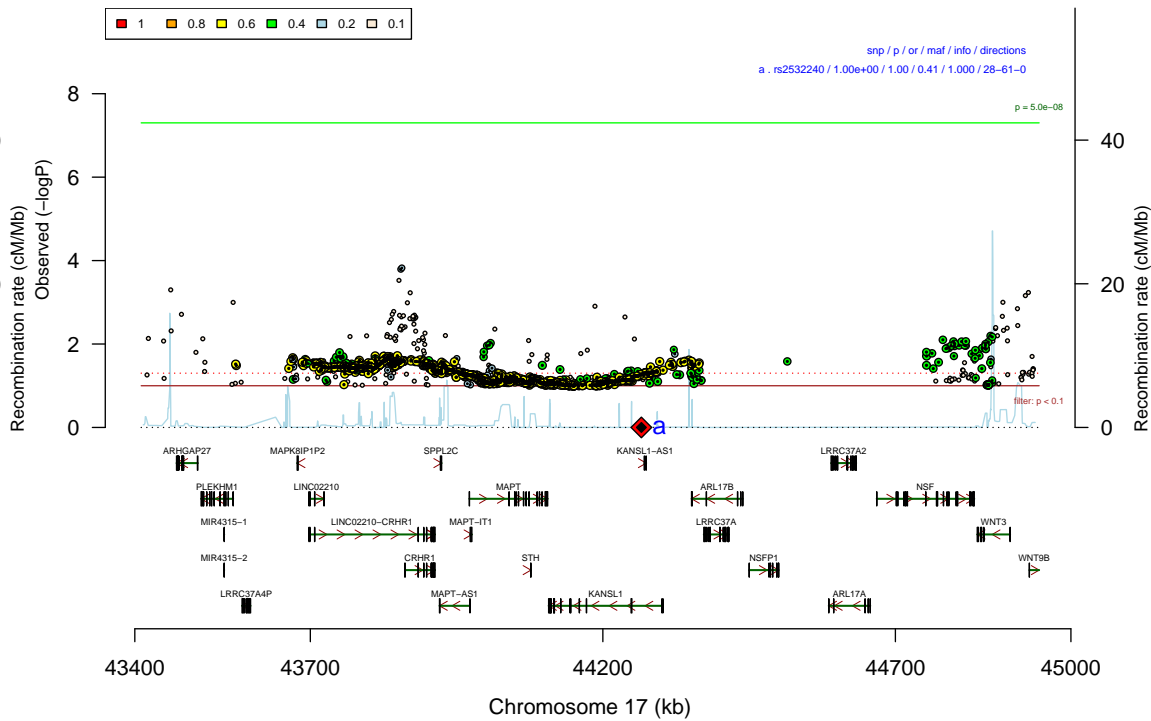

SCZ\_uncond-rs6577597-chr3

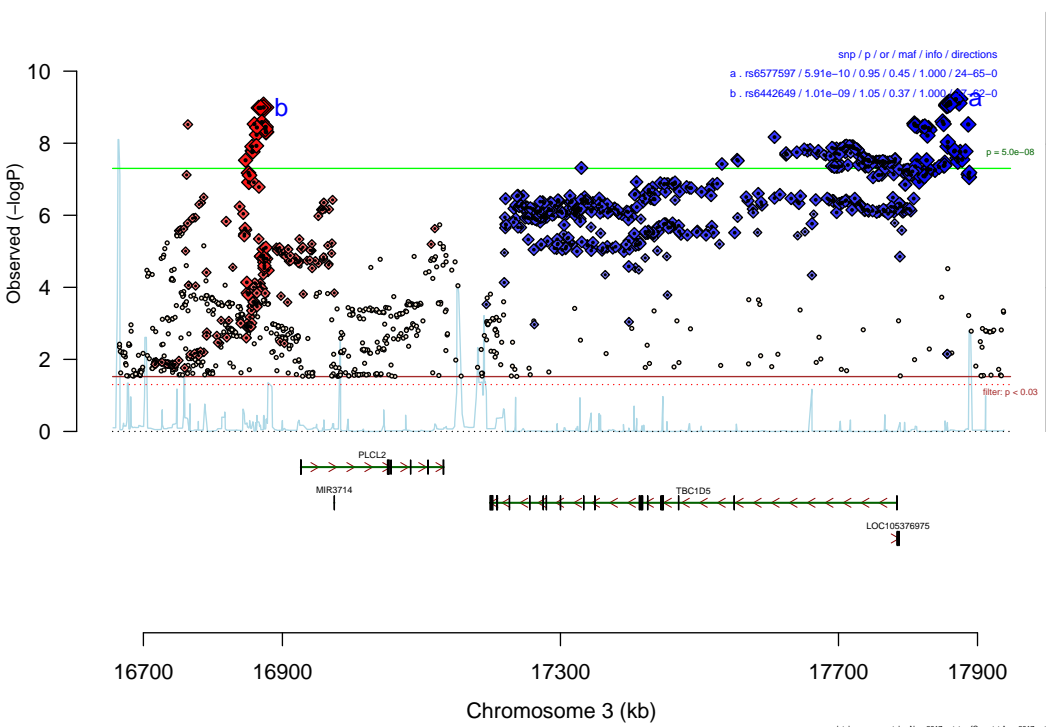

SCZ\_cond\_rs6577597-chr3

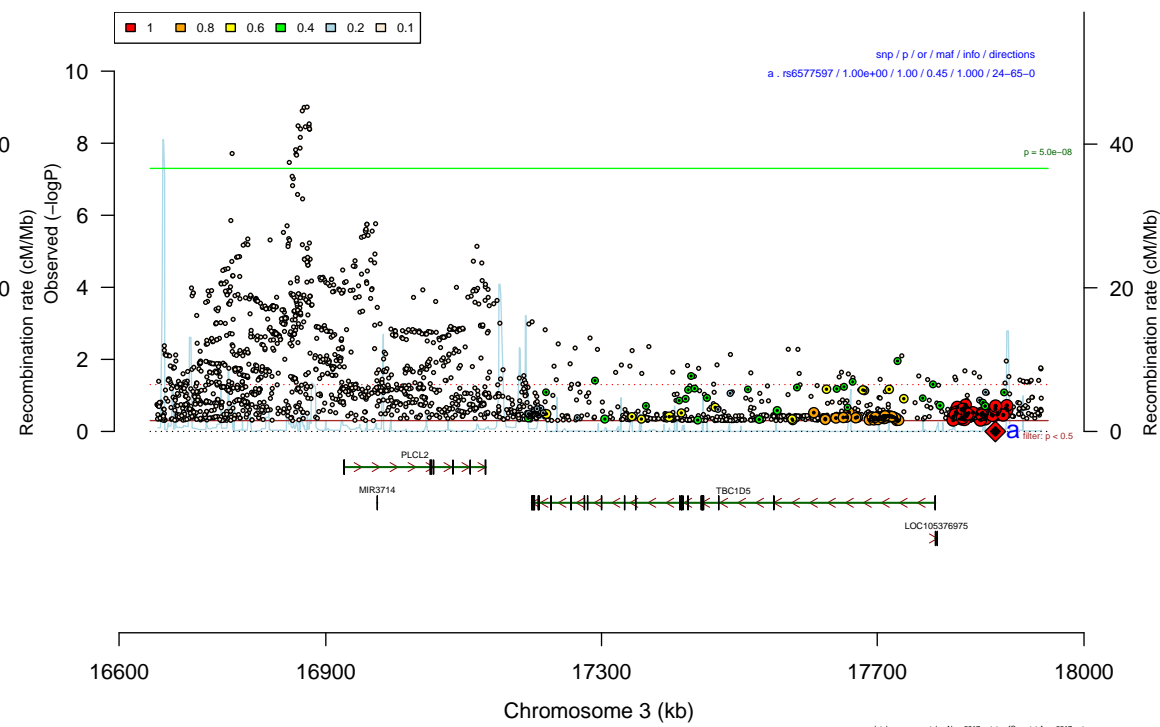

SCZ\_cond\_rs6577597-rs6442649-chr3

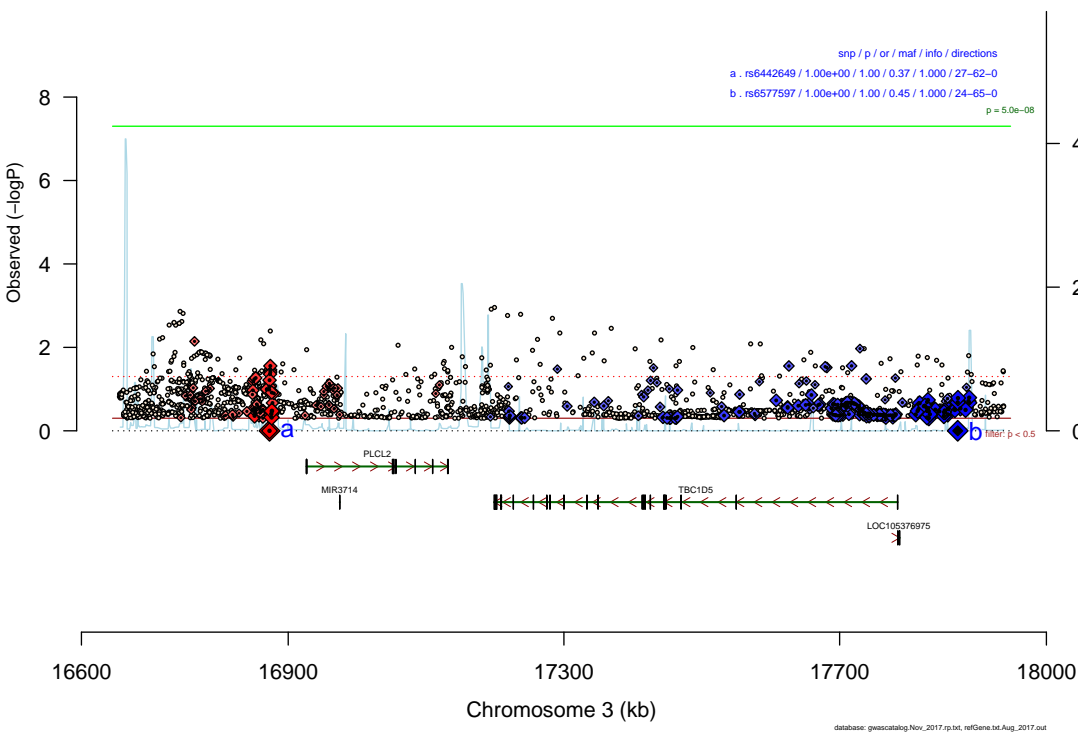

SCZ\_uncond-rs7938083-chr11

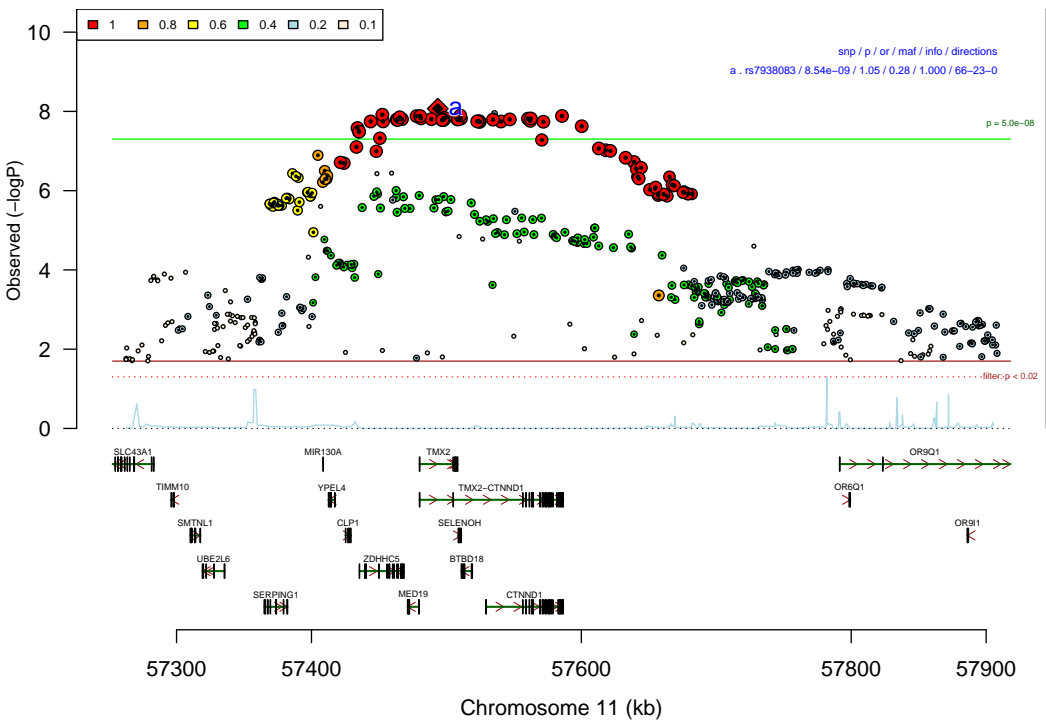

SCZ\_cond-rs7938083-chr11

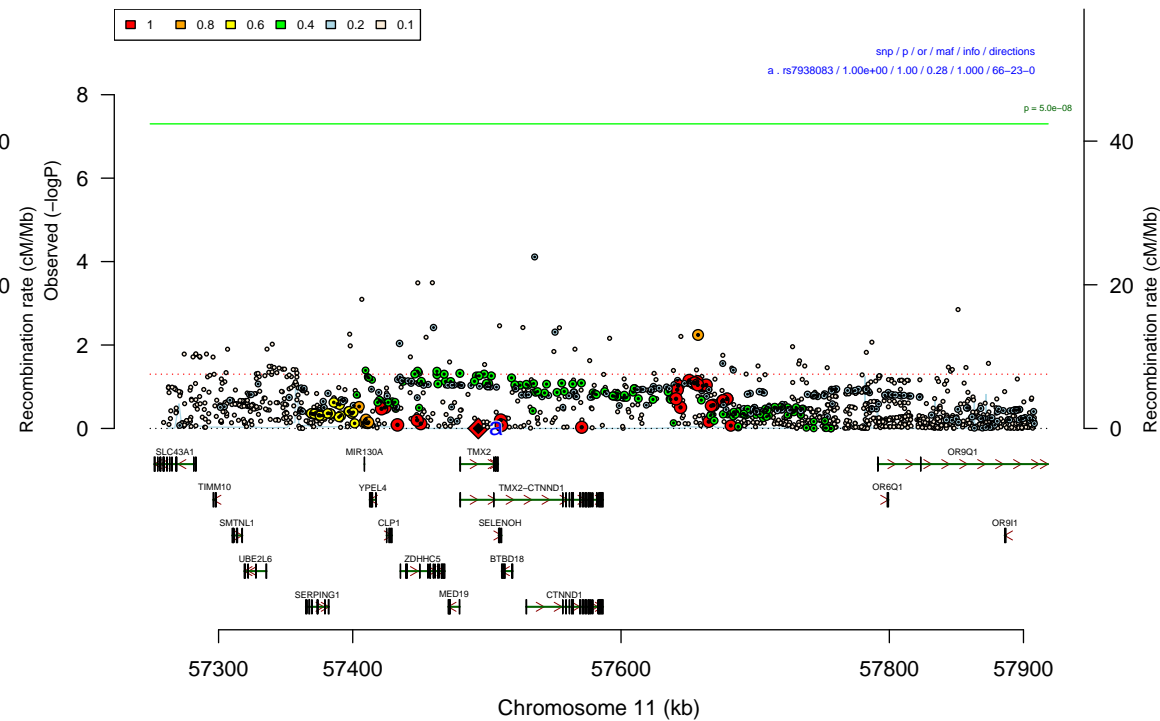

SCZ\_uncond-rs634940-chr6

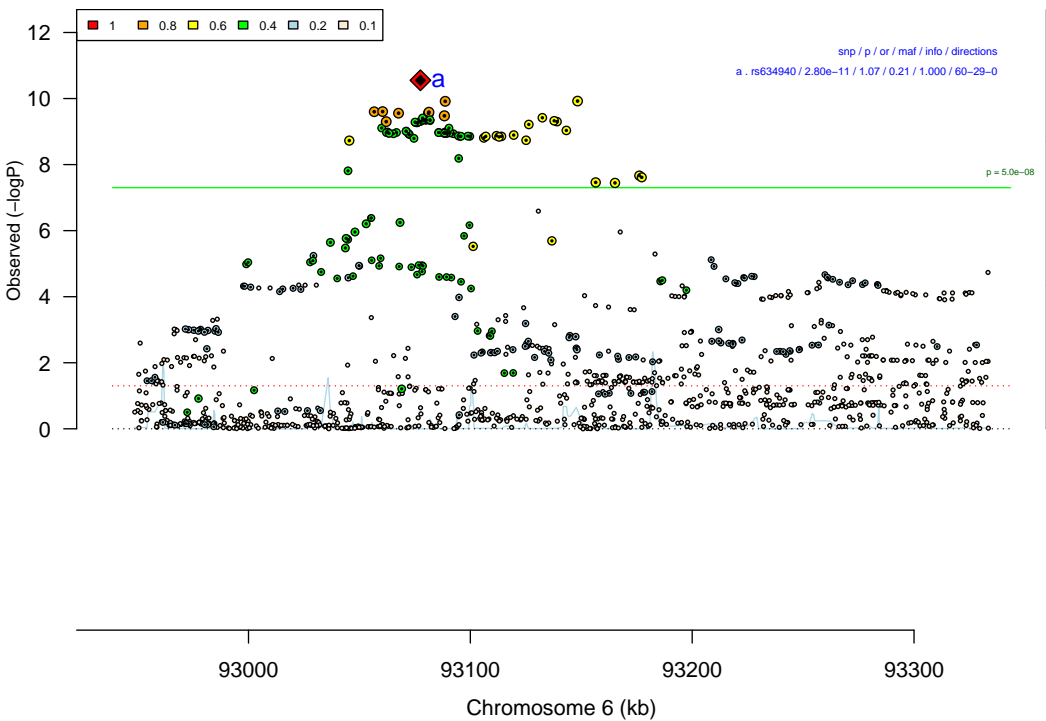

SCZ\_cond-rs634940-chr6

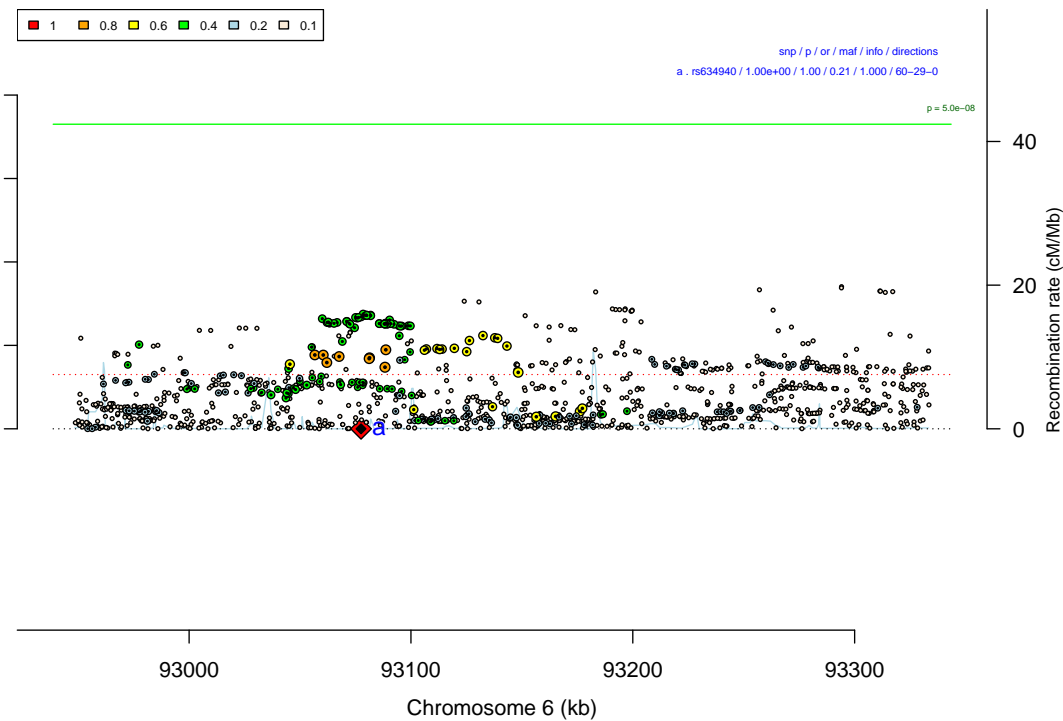

SCZ\_uncond-rs1915019-chr8

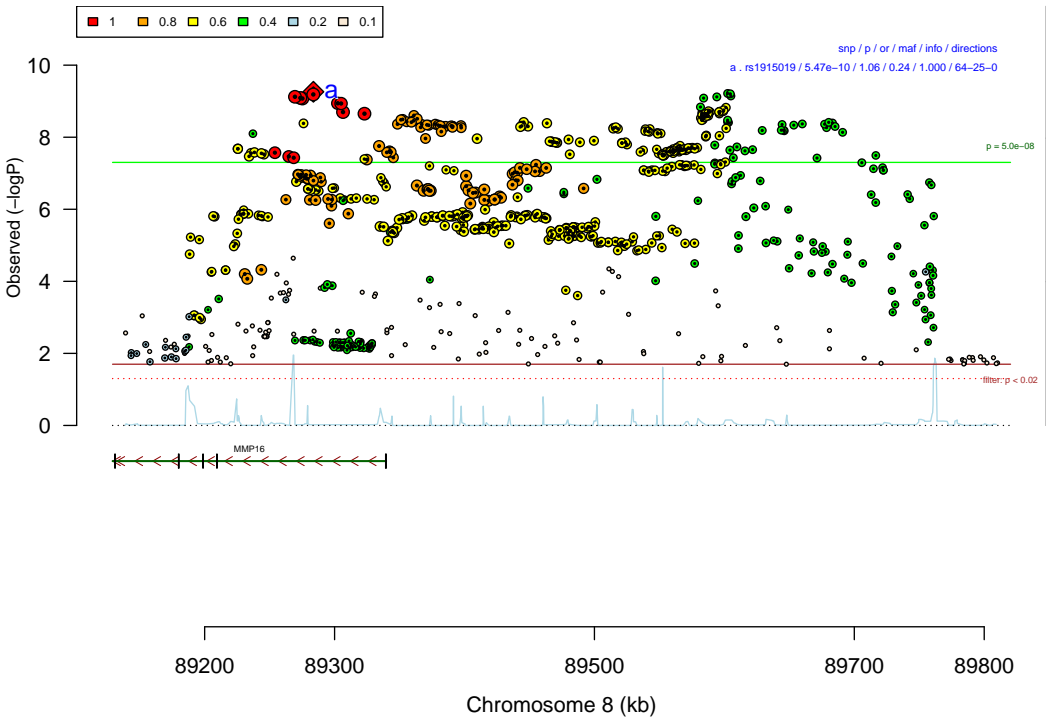

SCZ\_cond-rs1915019-chr8

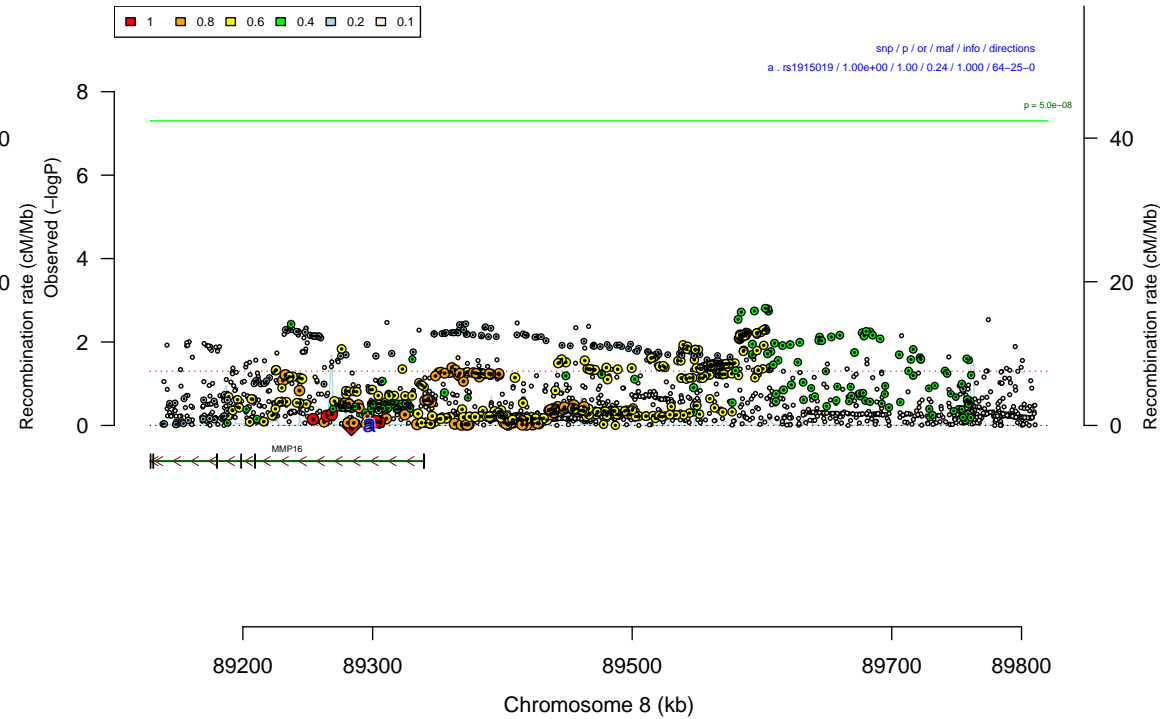

SCZ\_uncond-rs6538539-chr12

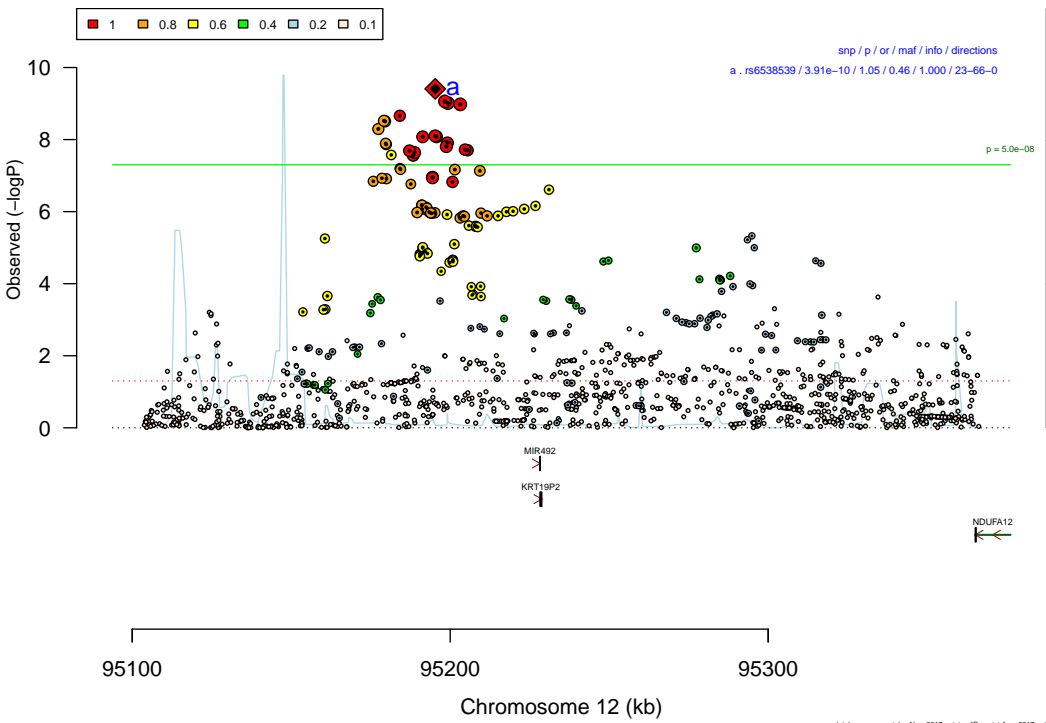

SCZ\_cond-rs6538539-chr12

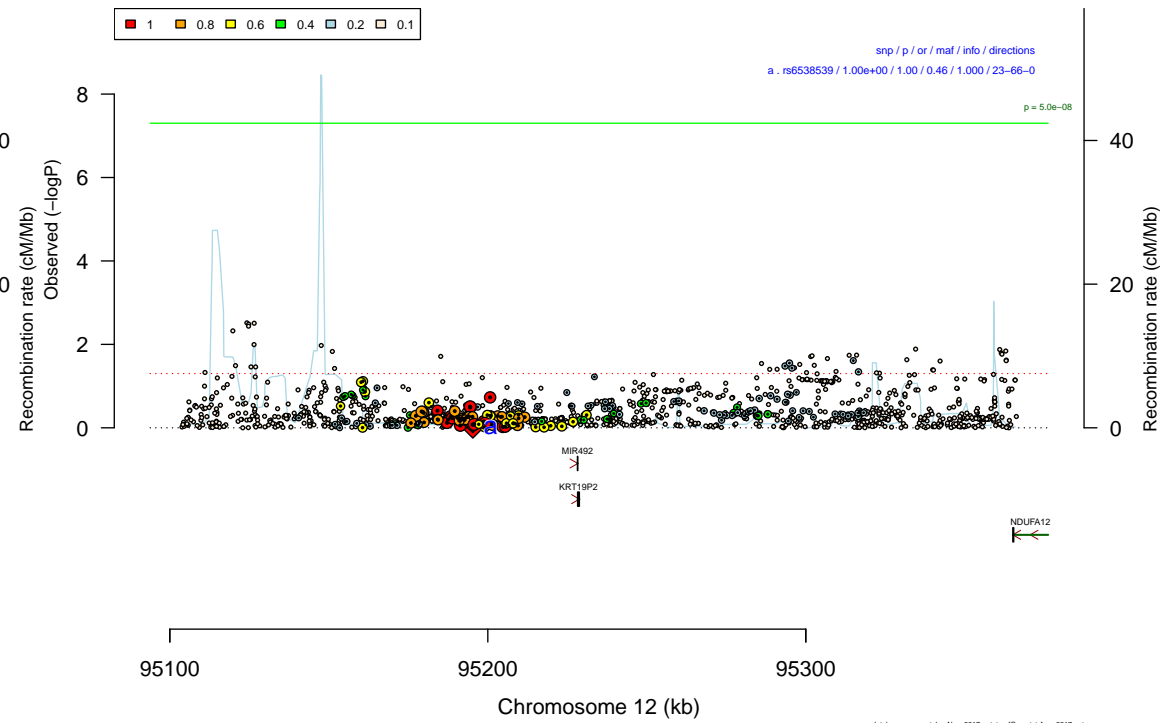

SCZ\_uncond-rs3752827-chr17

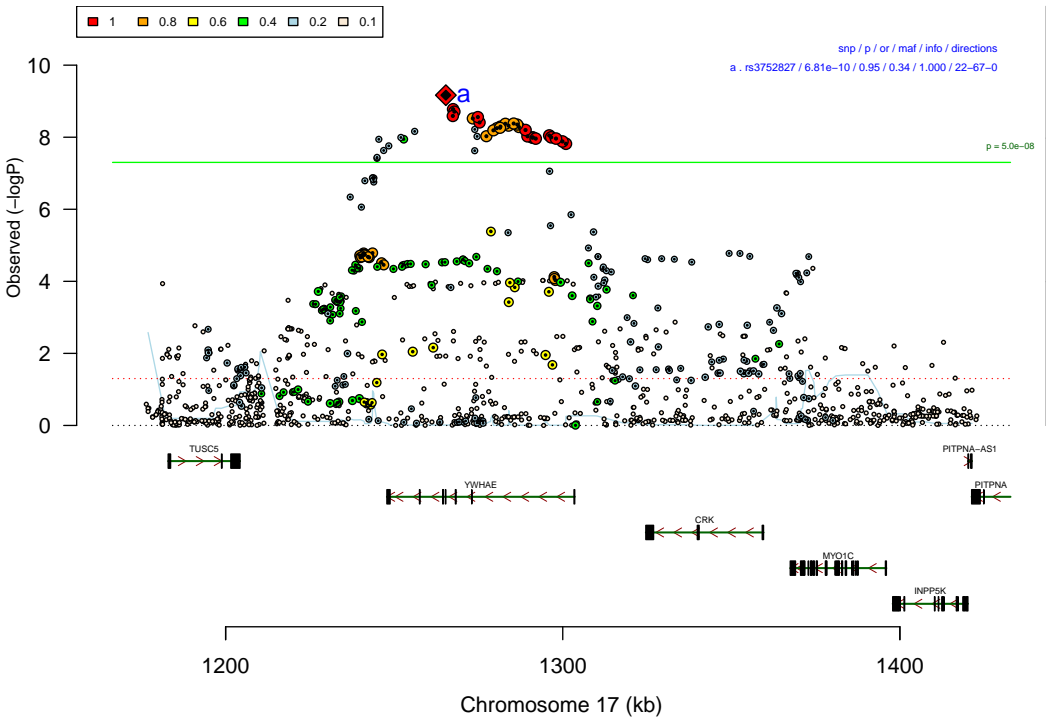

SCZ\_cond-rs3752827-chr17

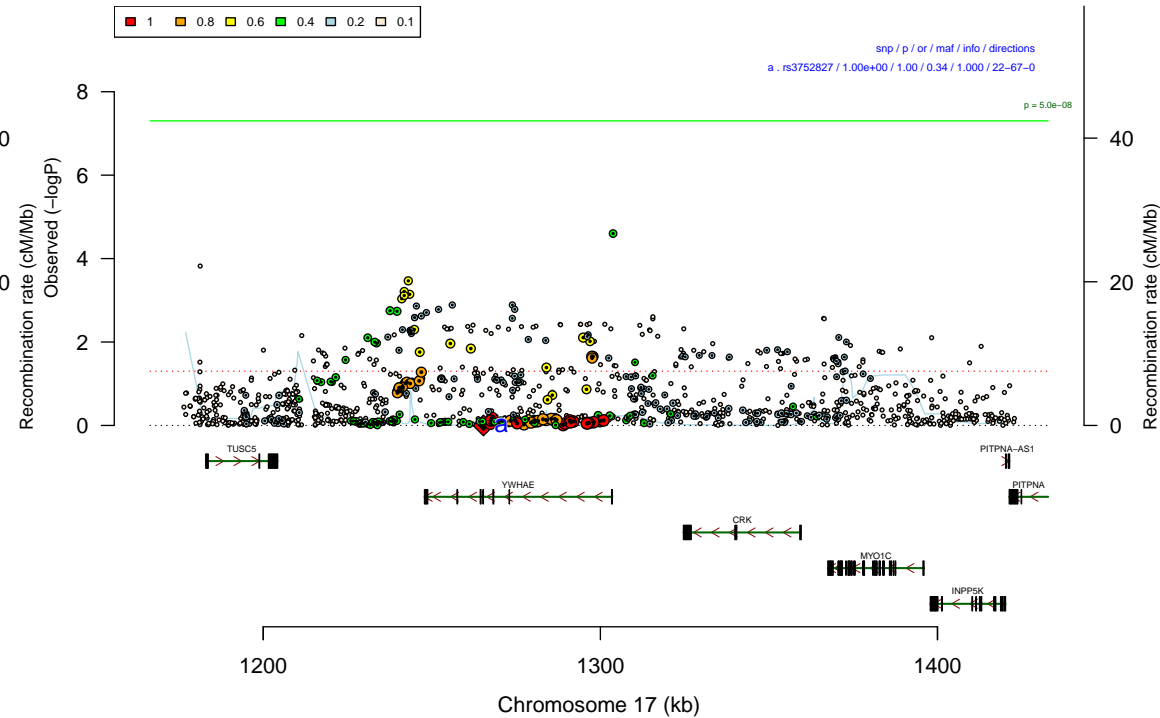

SCZ\_uncond-rs9926049-chr16

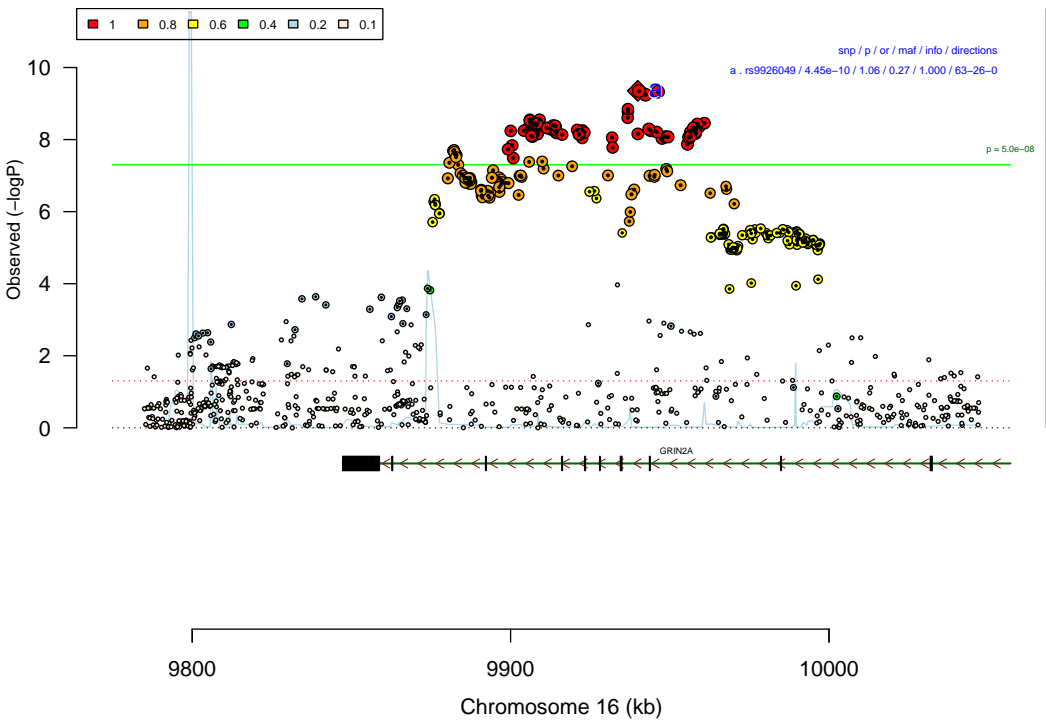

SCZ\_cond-rs9926049-chr16

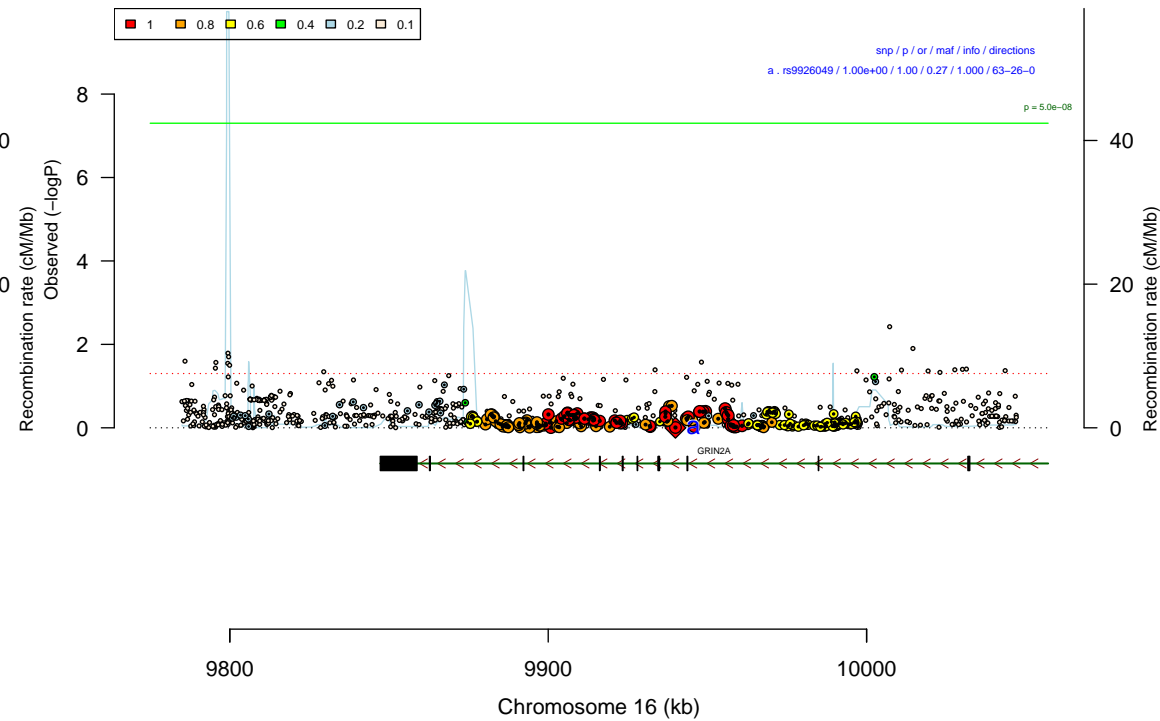



SCZ\_uncond-rs11696755-chr20

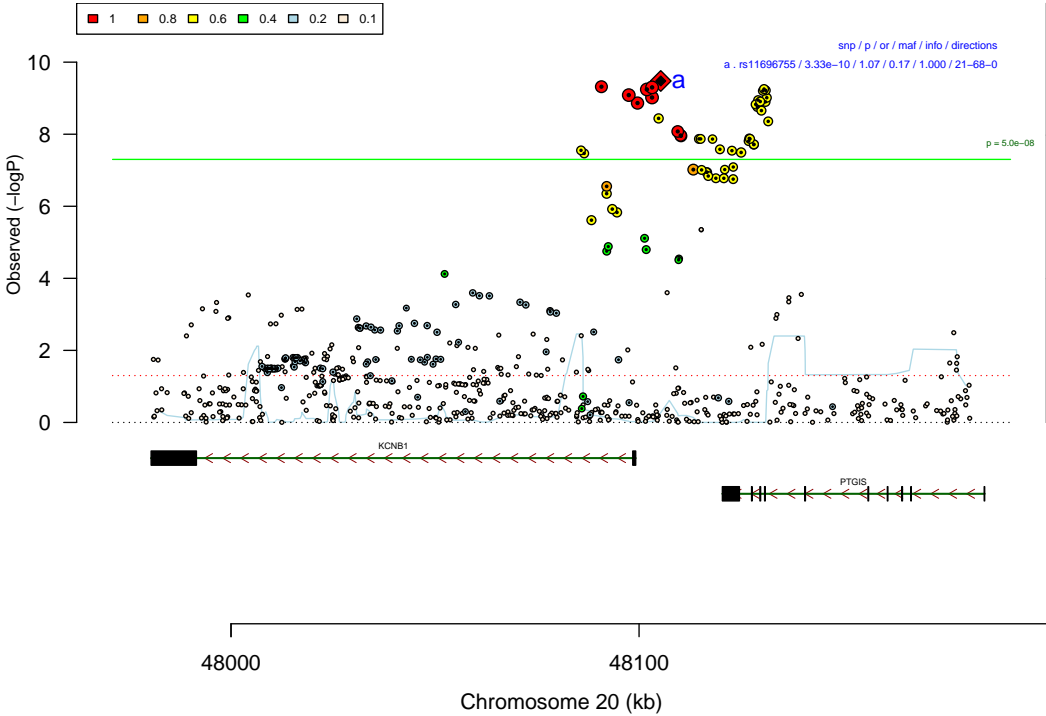

SCZ\_cond-rs11696755-chr20

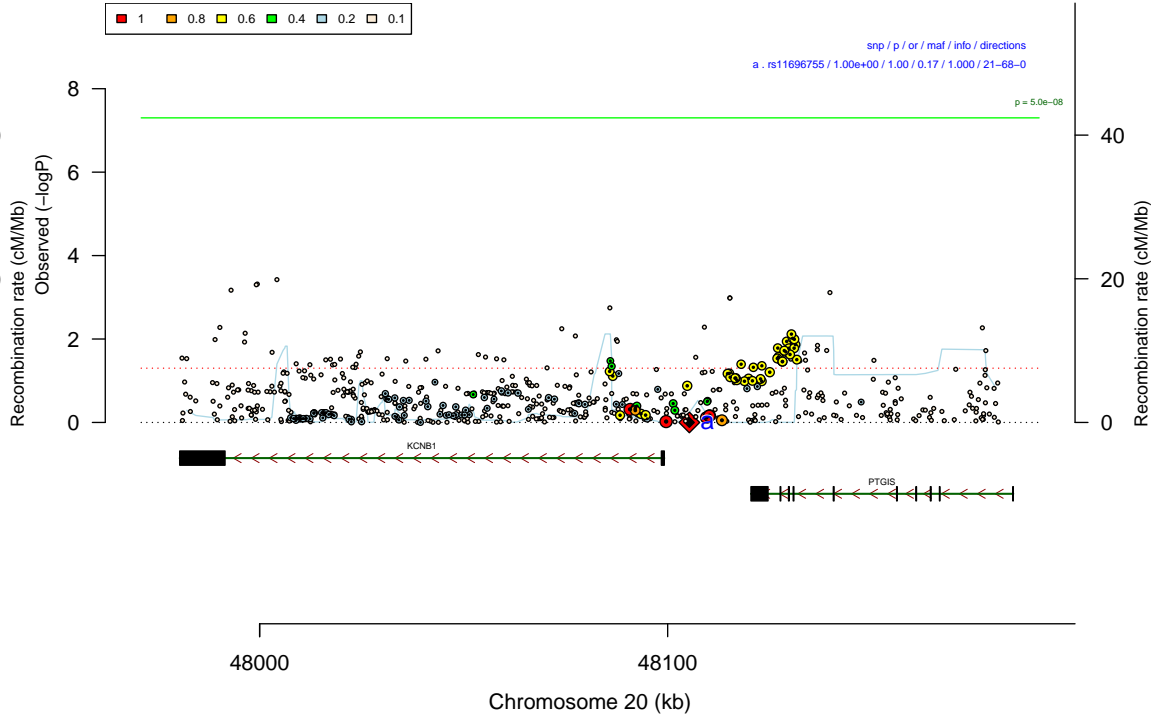

SCZ\_uncond-rs13090130-chr3

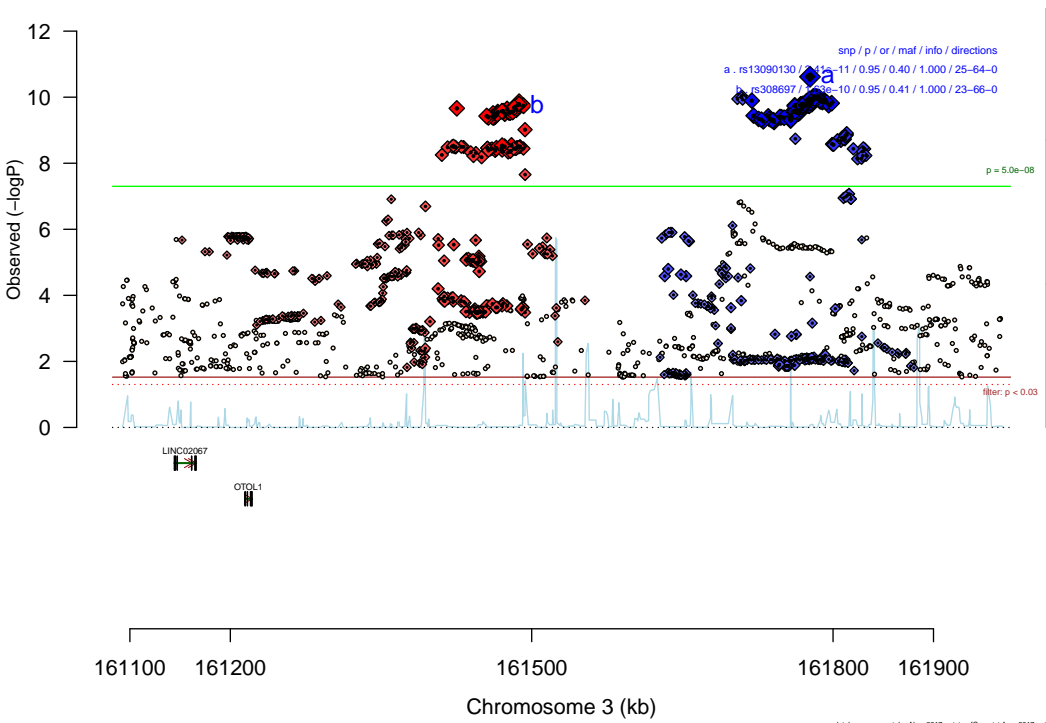

SCZ\_cond\_rs13090130-chr3

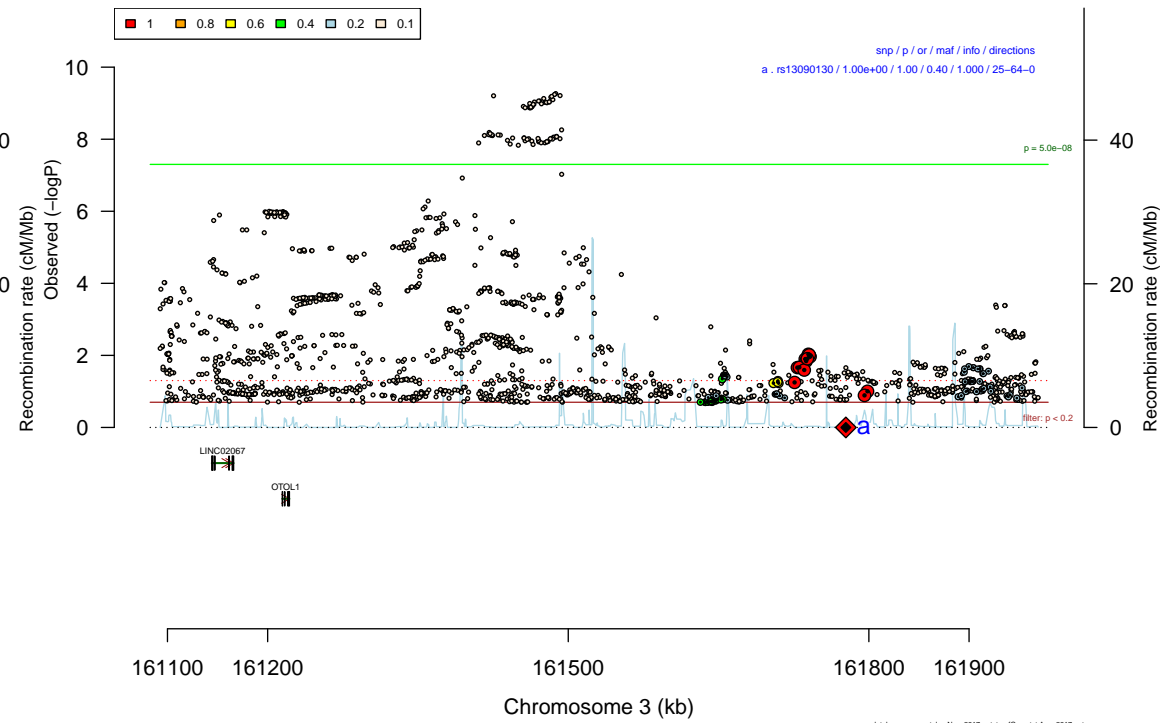

SCZ\_cond\_rs13090130-rs308697-chr3

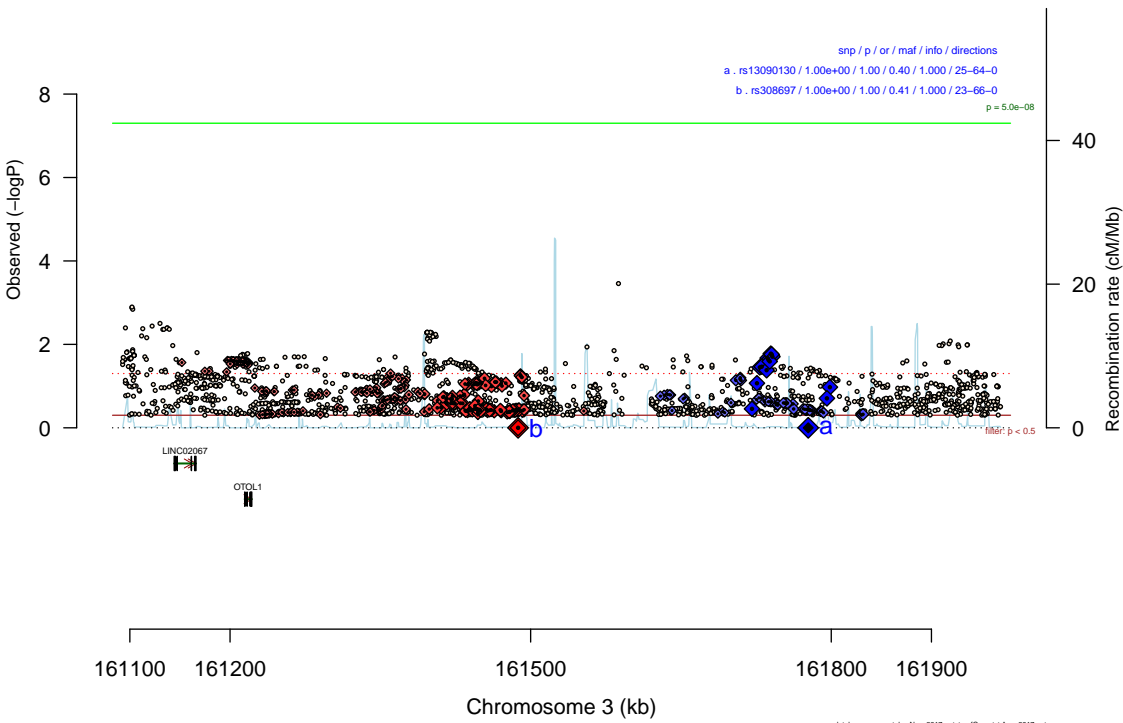

SCZ\_uncond-rs10069930-chr5

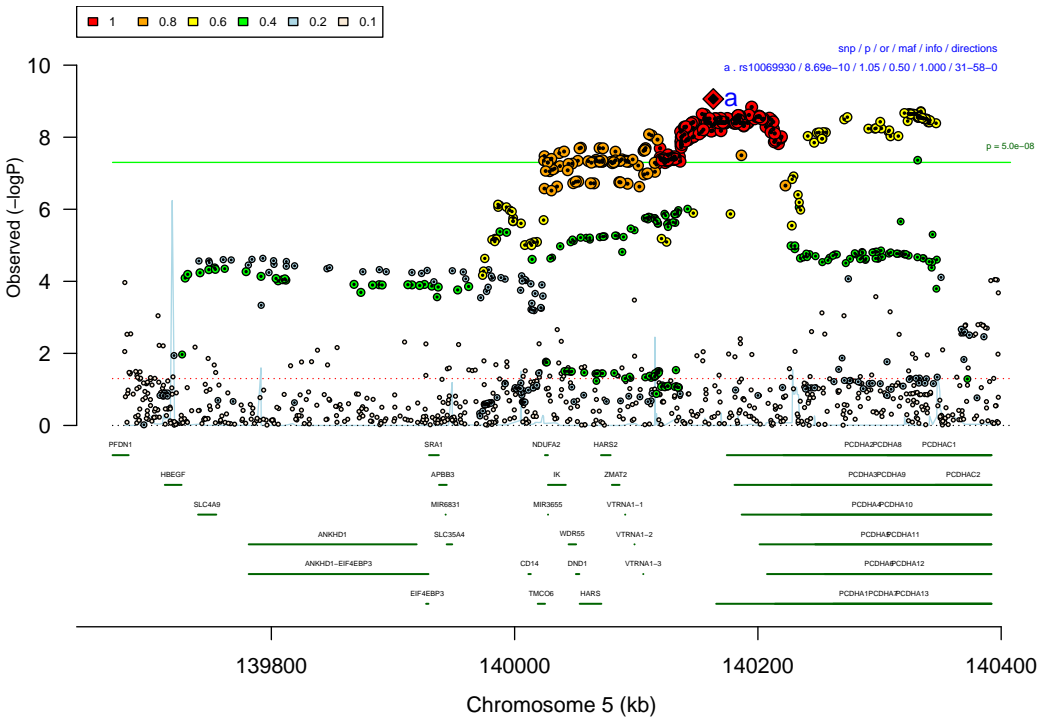

SCZ\_cond-rs10069930-chr5

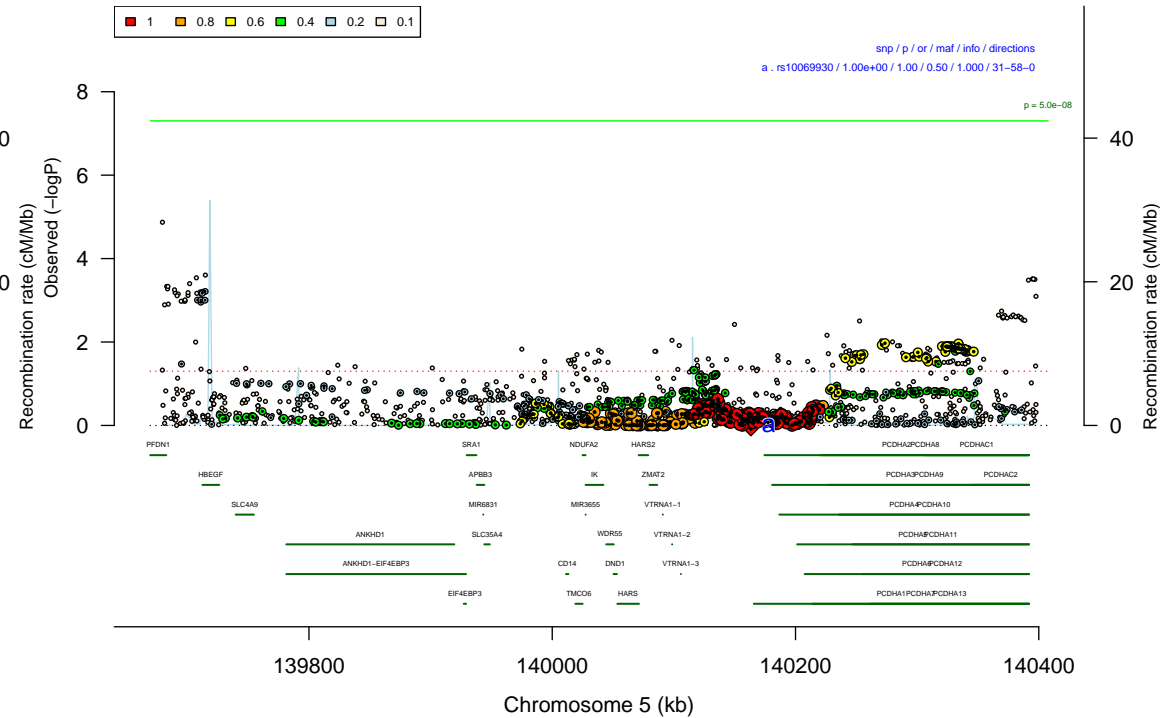

SCZ\_uncond-rs6430492-chr2

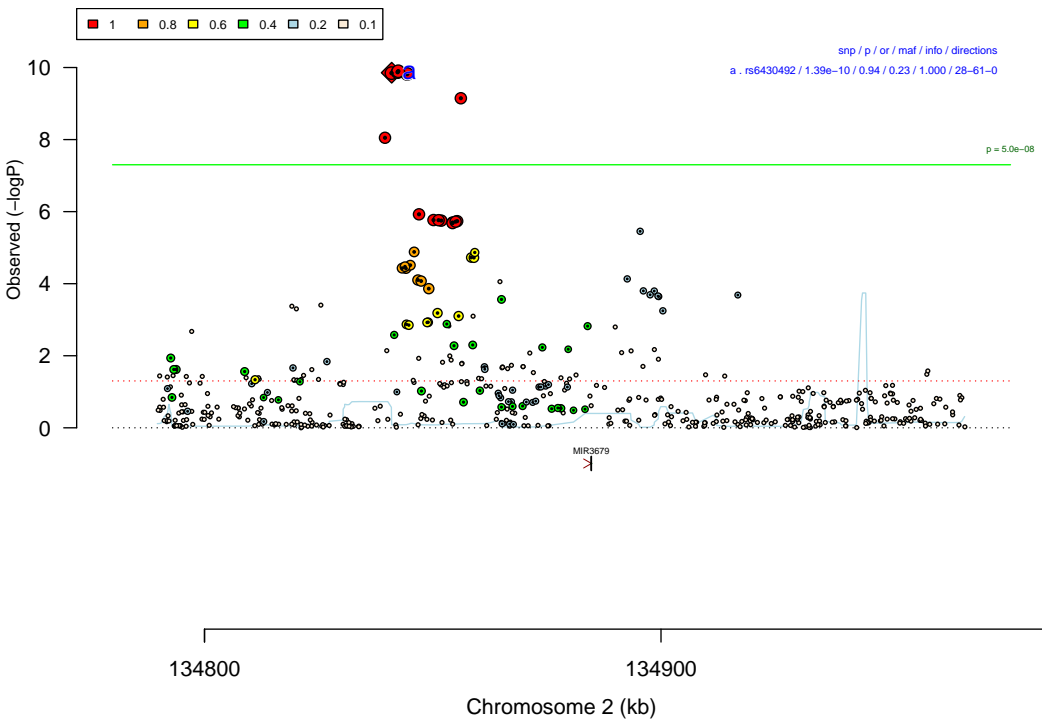

SCZ\_cond-rs6430492-chr2

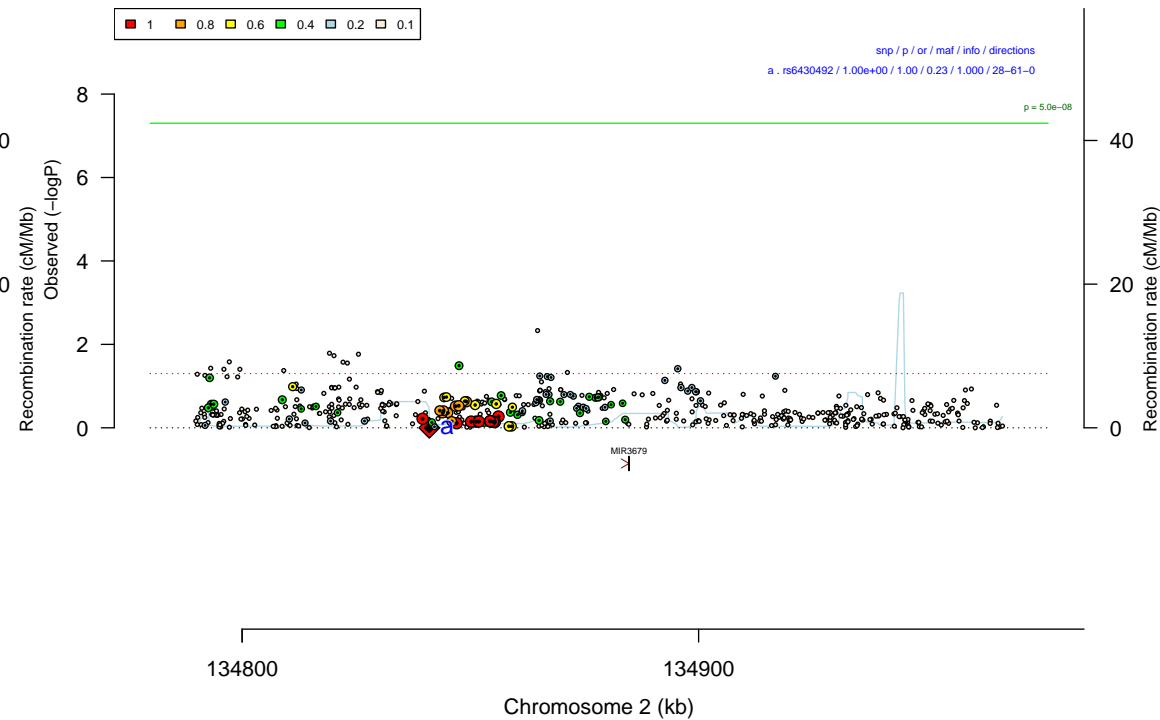

SCZ\_uncond-rs1856507-chr6

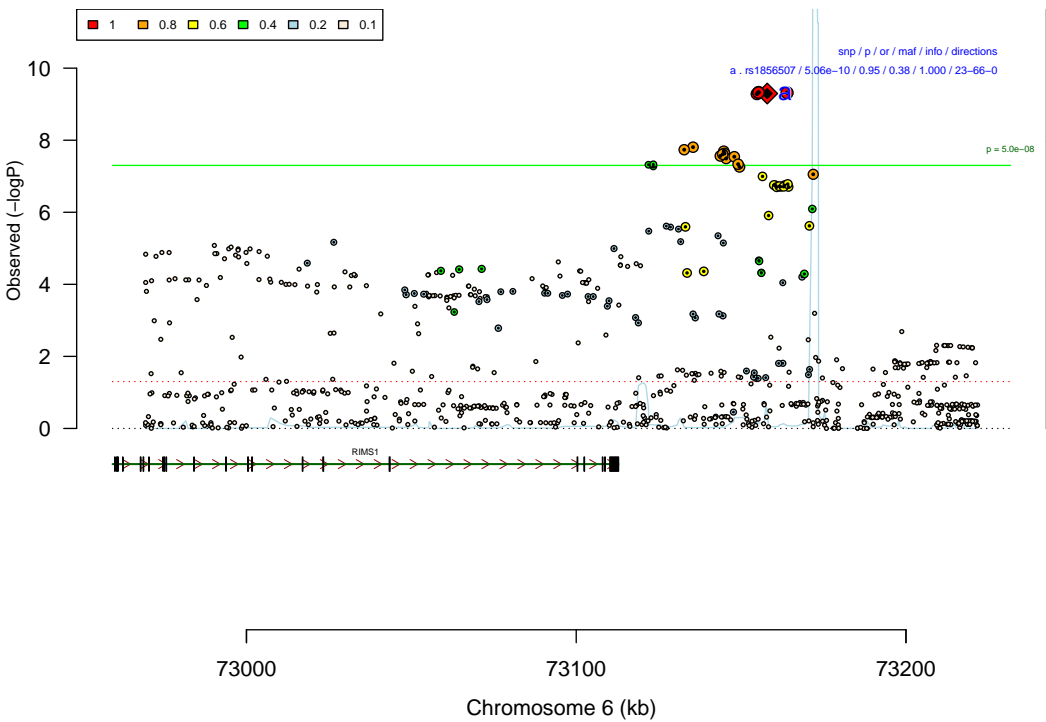

SCZ\_cond-rs1856507-chr6

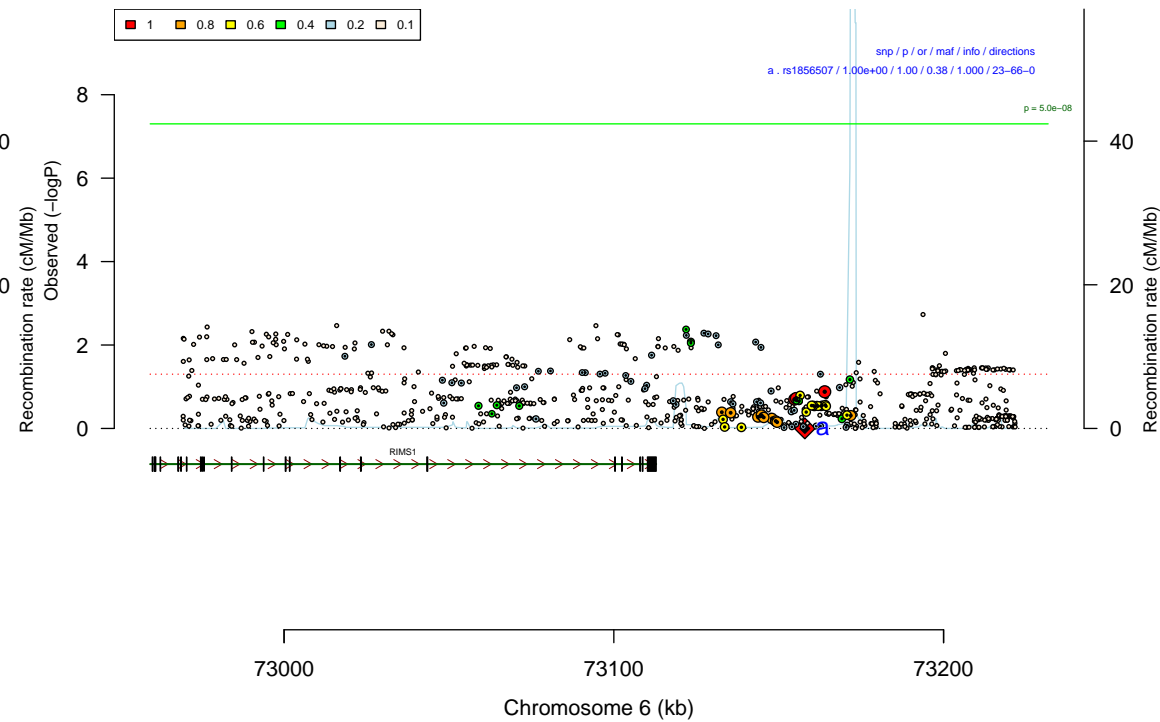

SCZ\_uncond-rs28490262-chr3

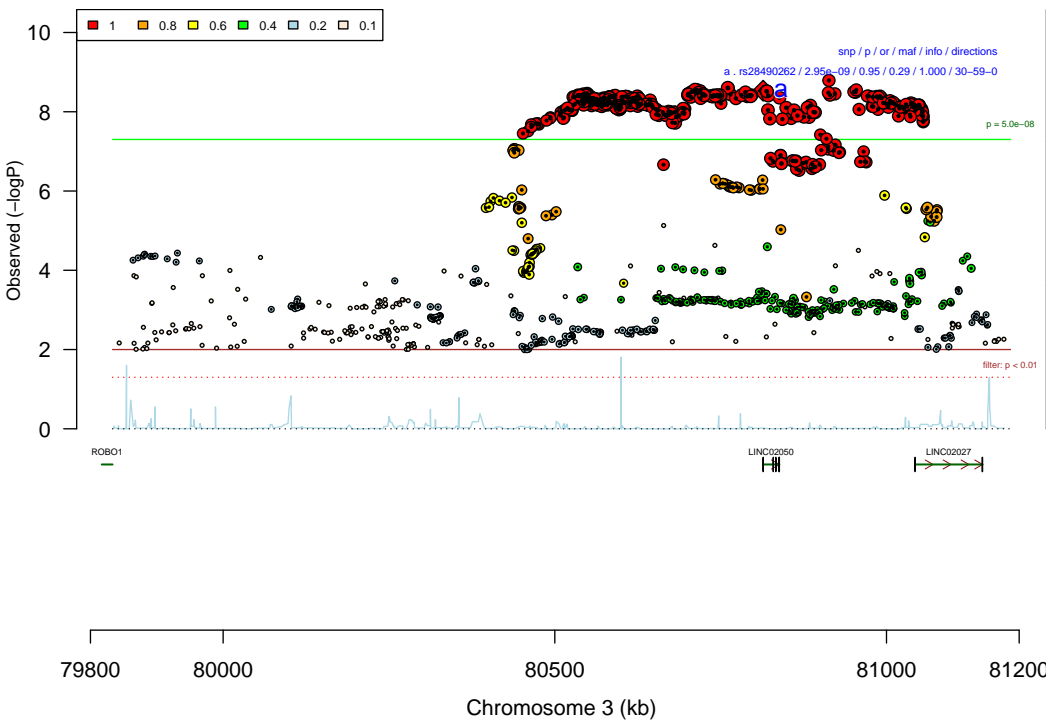

SCZ\_cond-rs28490262-chr3

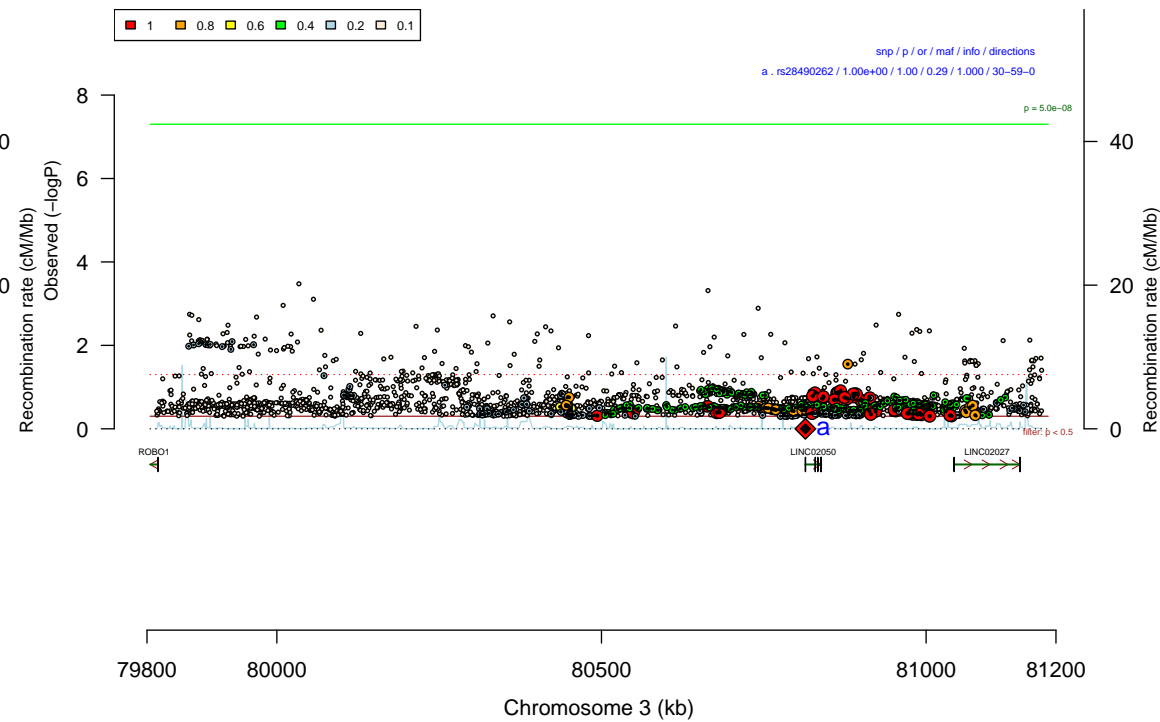

SCZ\_uncond-rs12363019-chr11

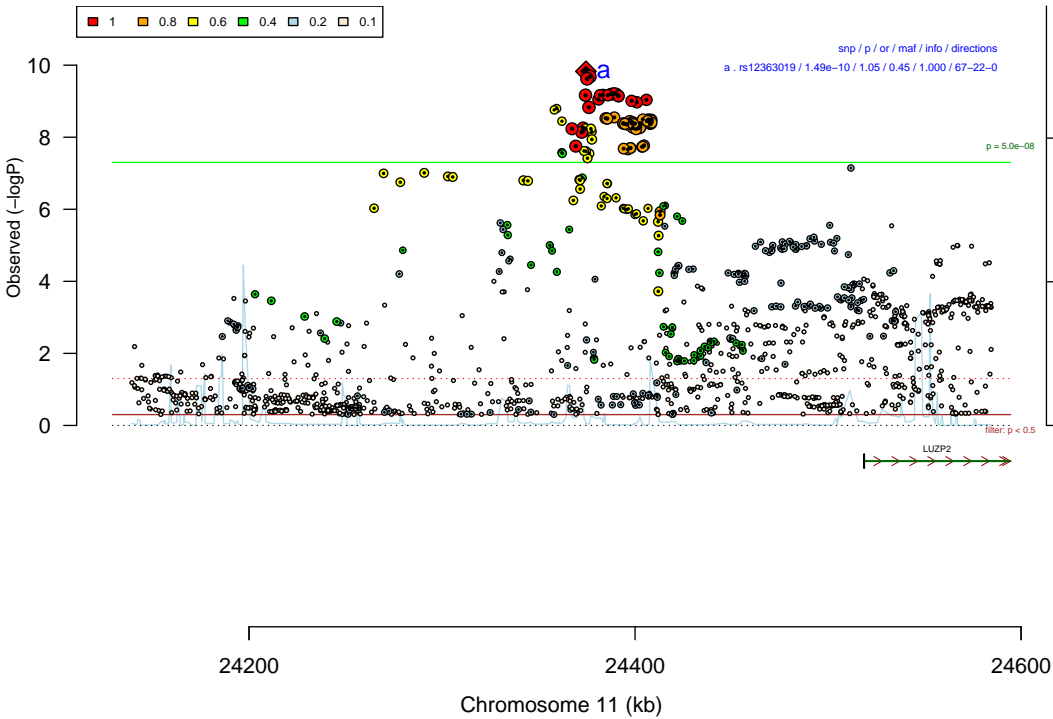

SCZ\_cond-rs12363019-chr11

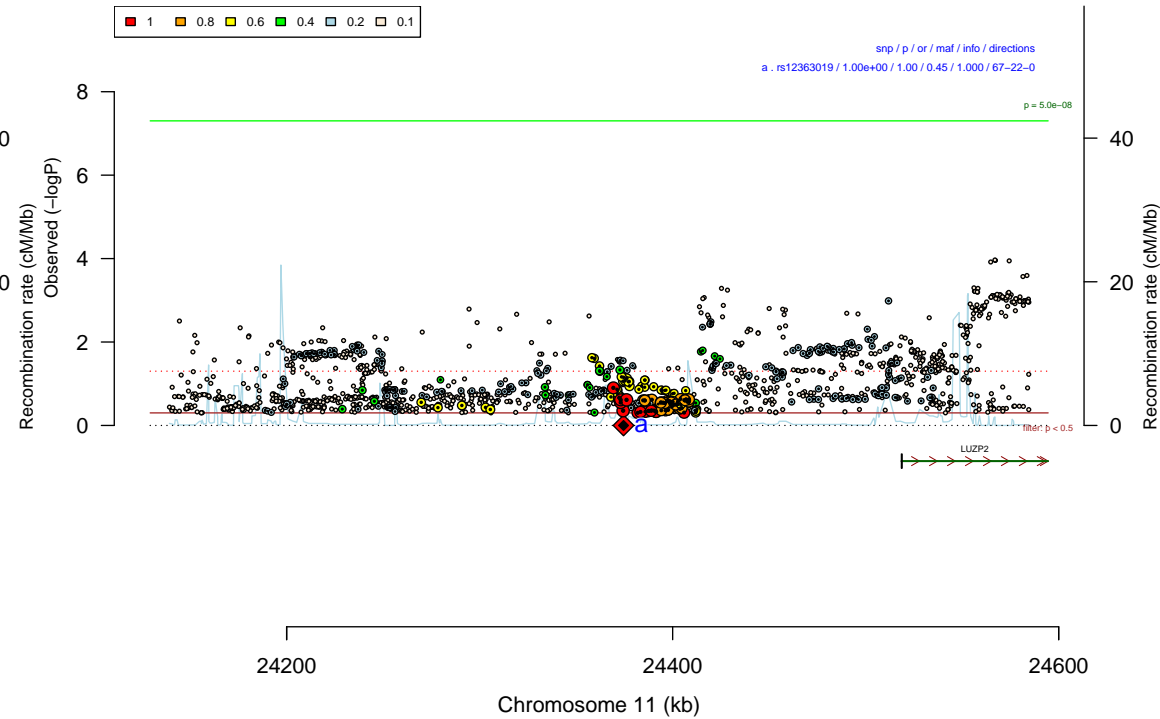

SCZ\_uncond-rs2387414-chr19

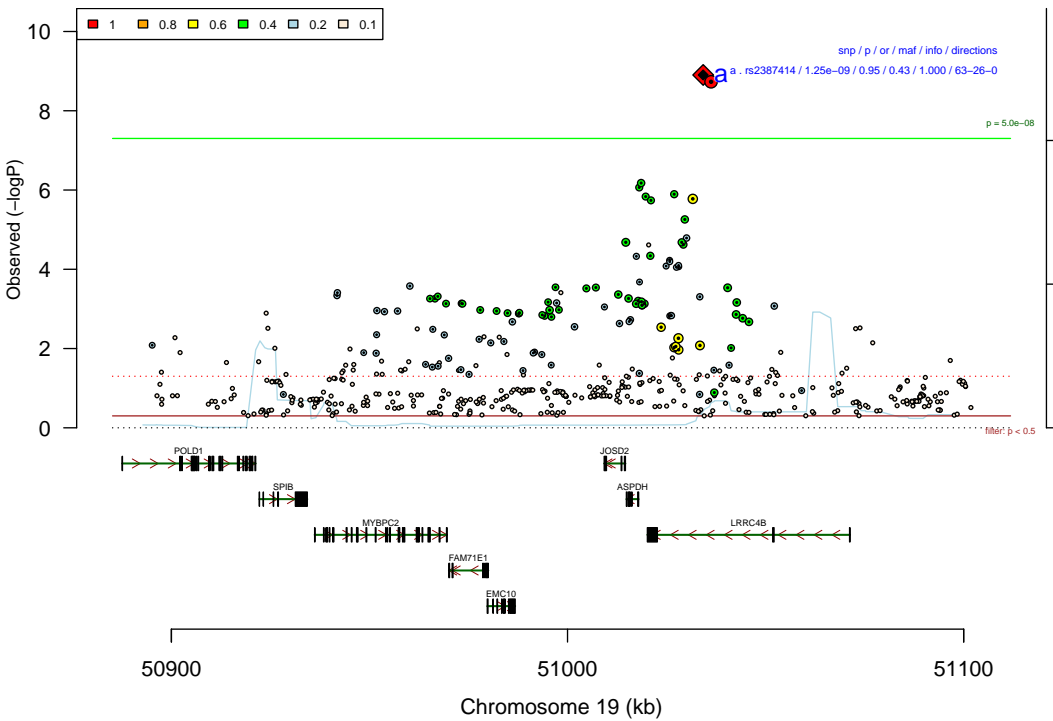

SCZ\_cond-rs2387414-chr19

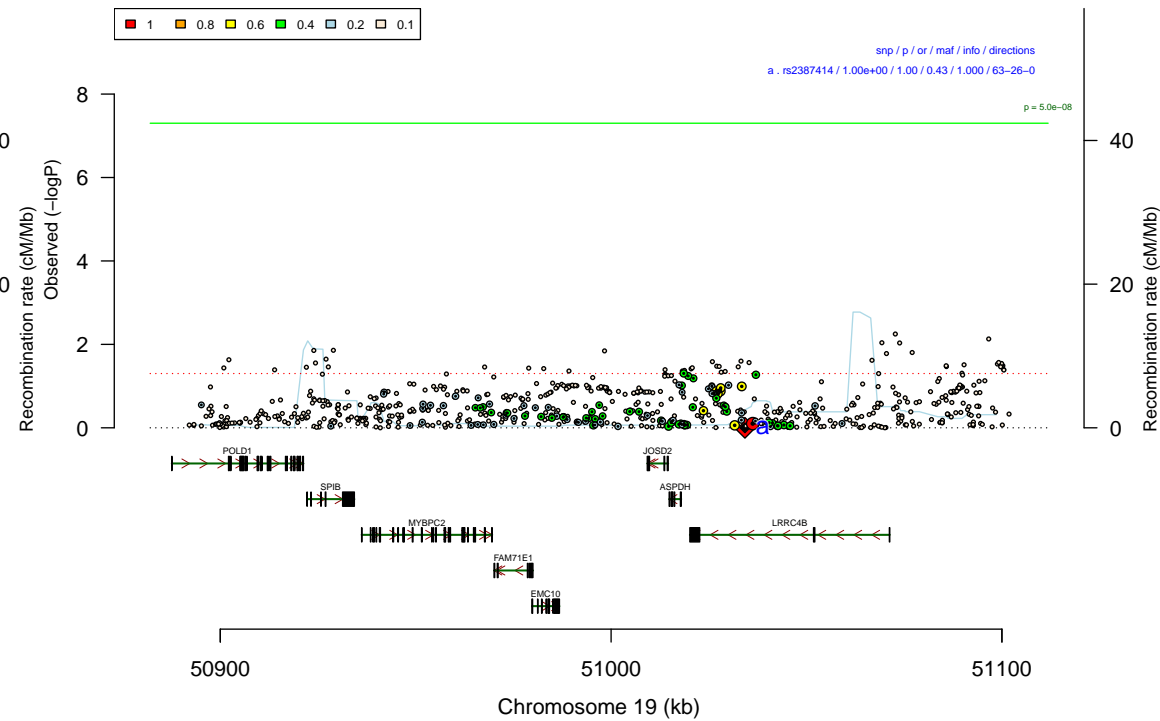

SCZ\_uncond-rs6984242-chr8

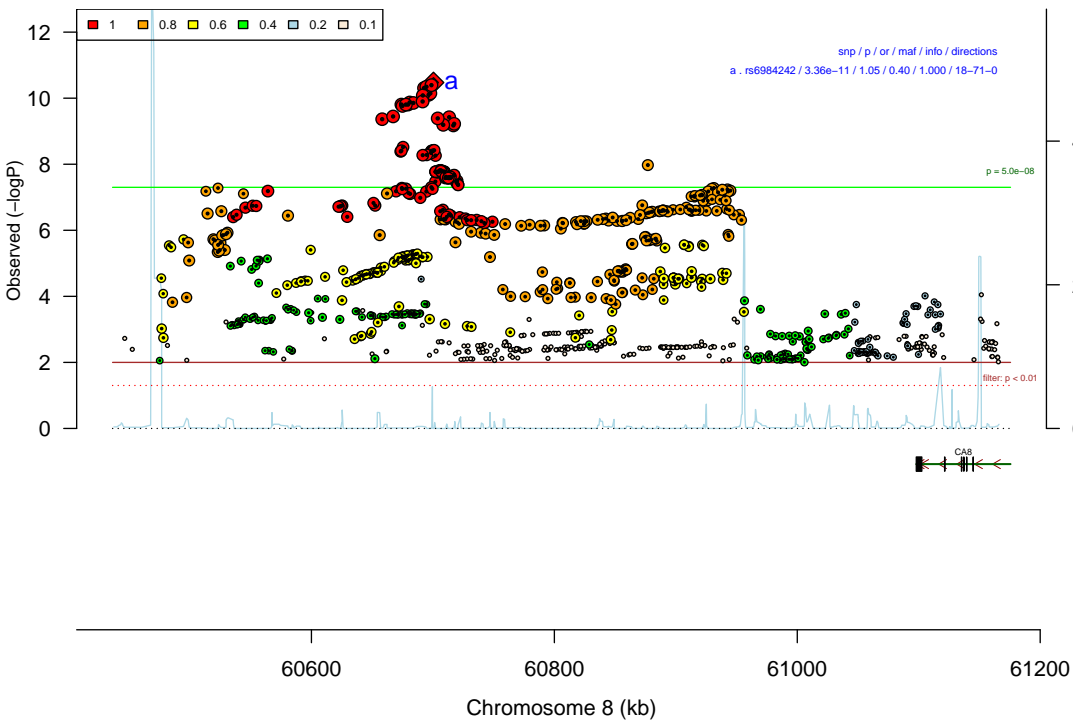

SCZ\_cond-rs6984242-chr8

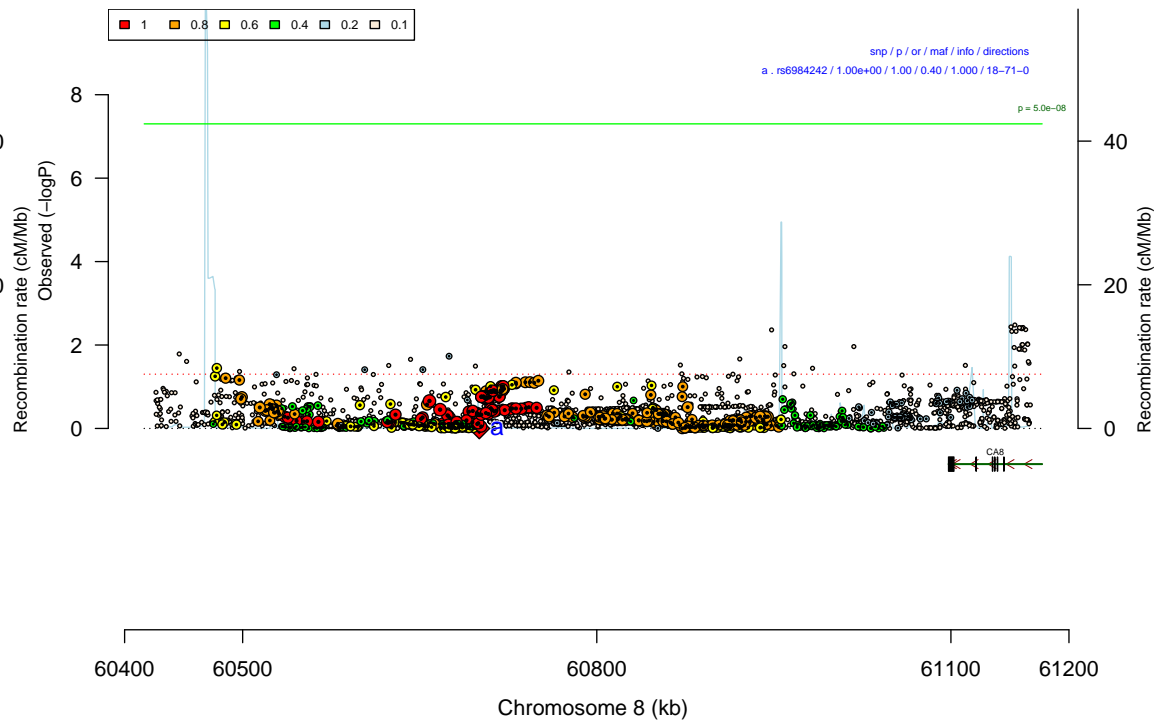

SCZ\_uncond-rs2022265-chr6

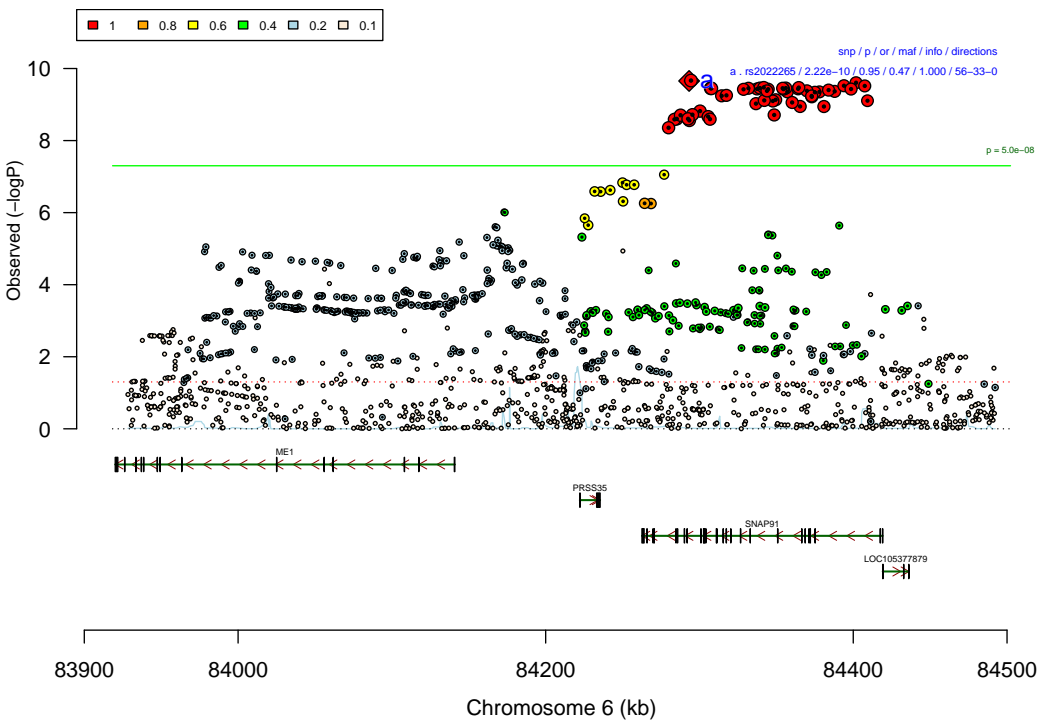

SCZ\_cond-rs2022265-chr6

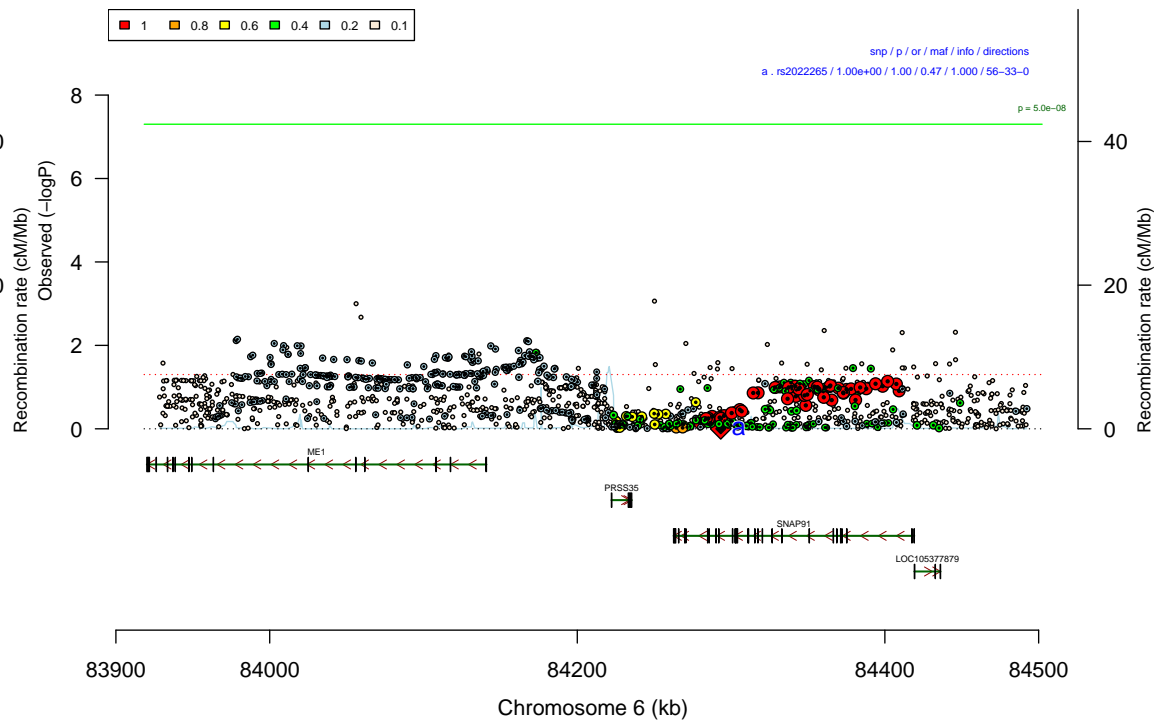

SCZ\_uncond-rs72986630-chr19

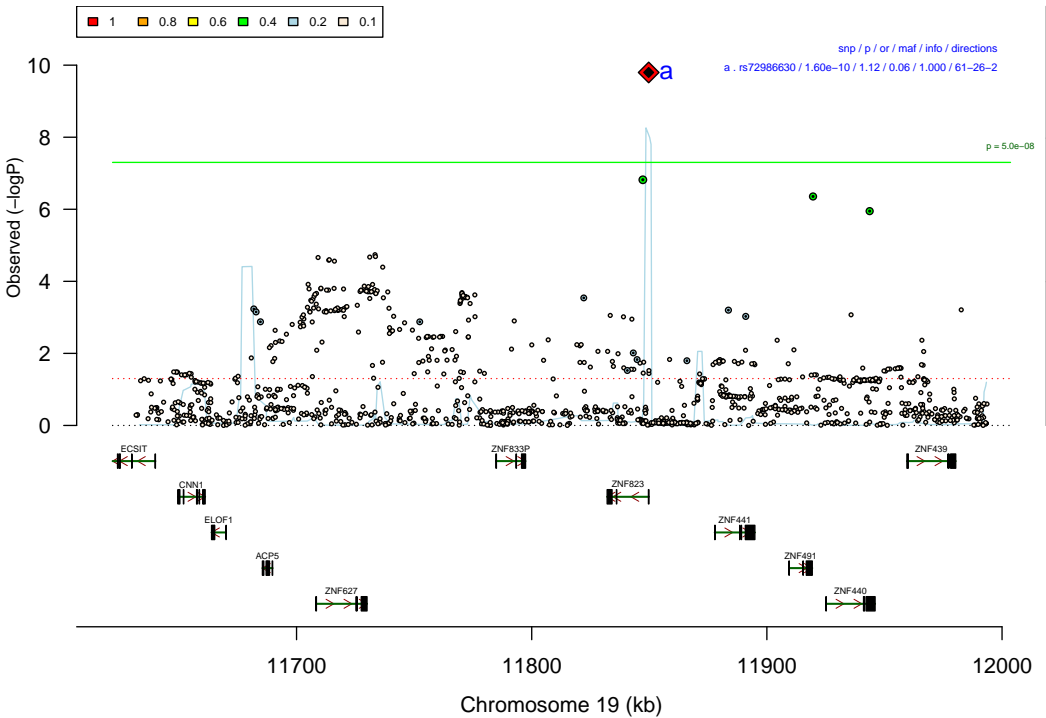

SCZ\_cond-rs72986630-chr19

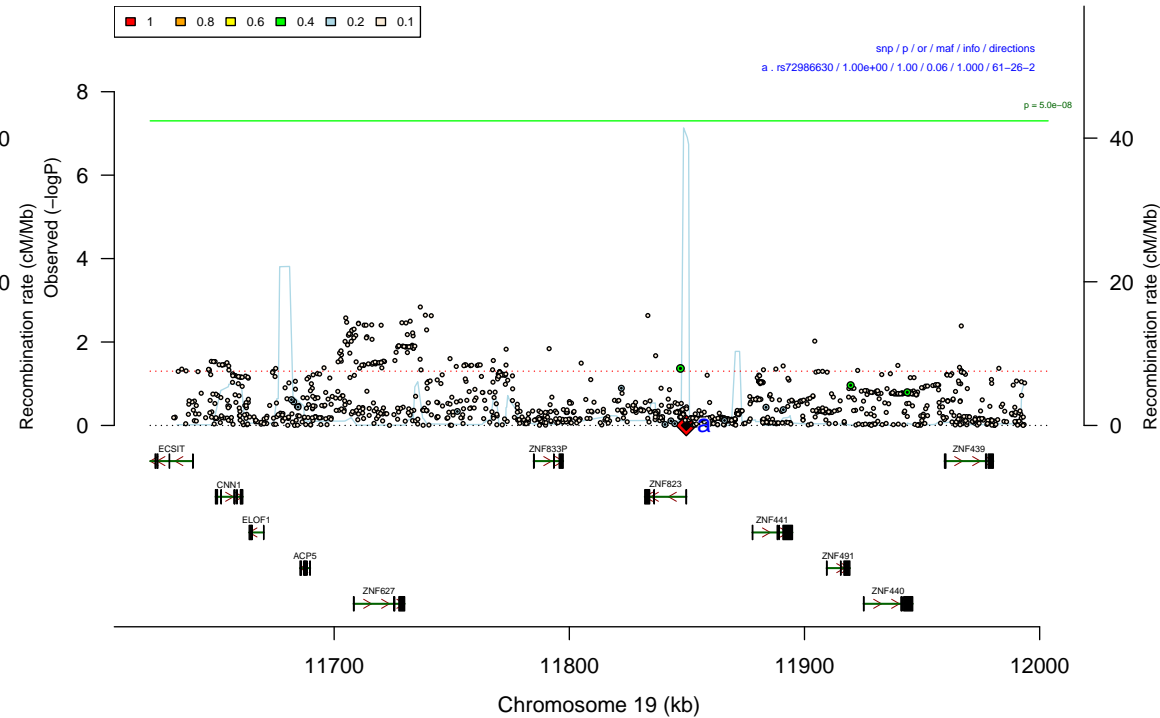

SCZ\_uncond-rs6588168-chr1

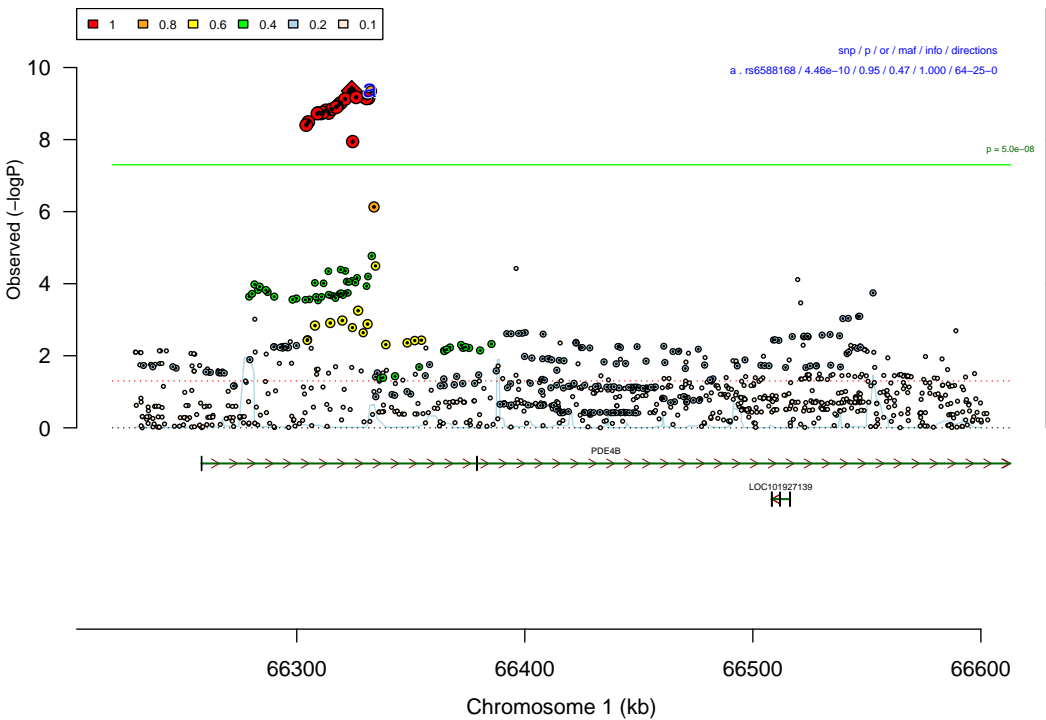

SCZ\_cond-rs6588168-chr1

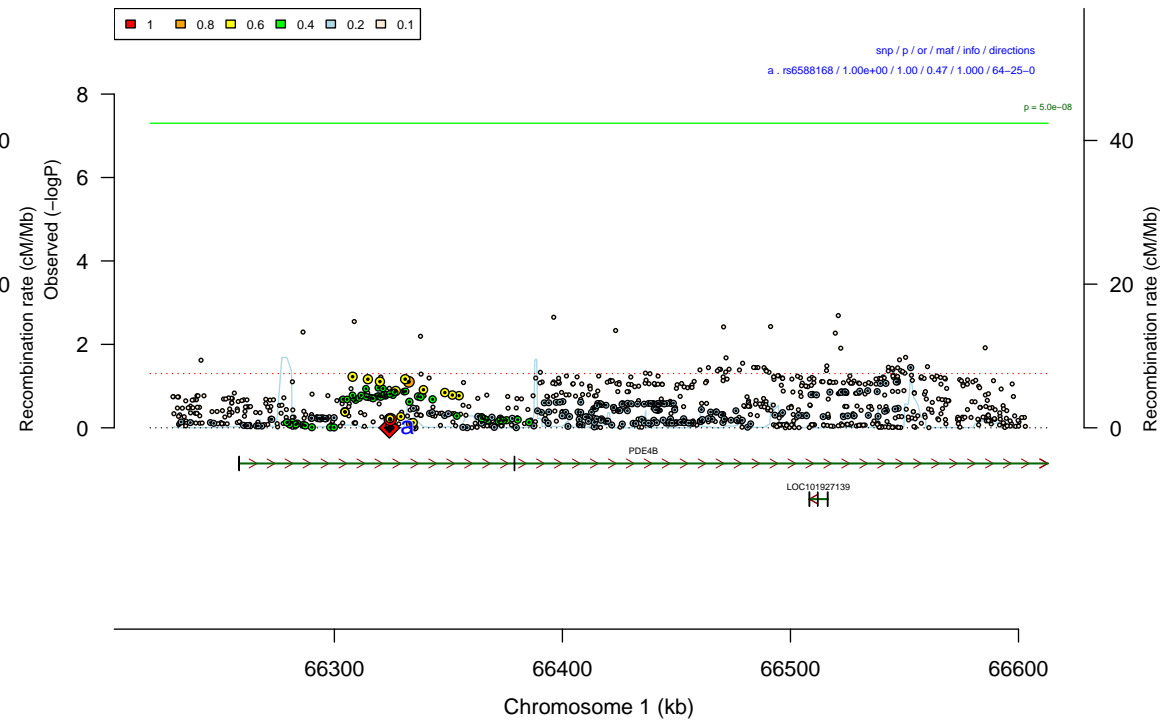

SCZ\_uncond-rs10957321-chr8

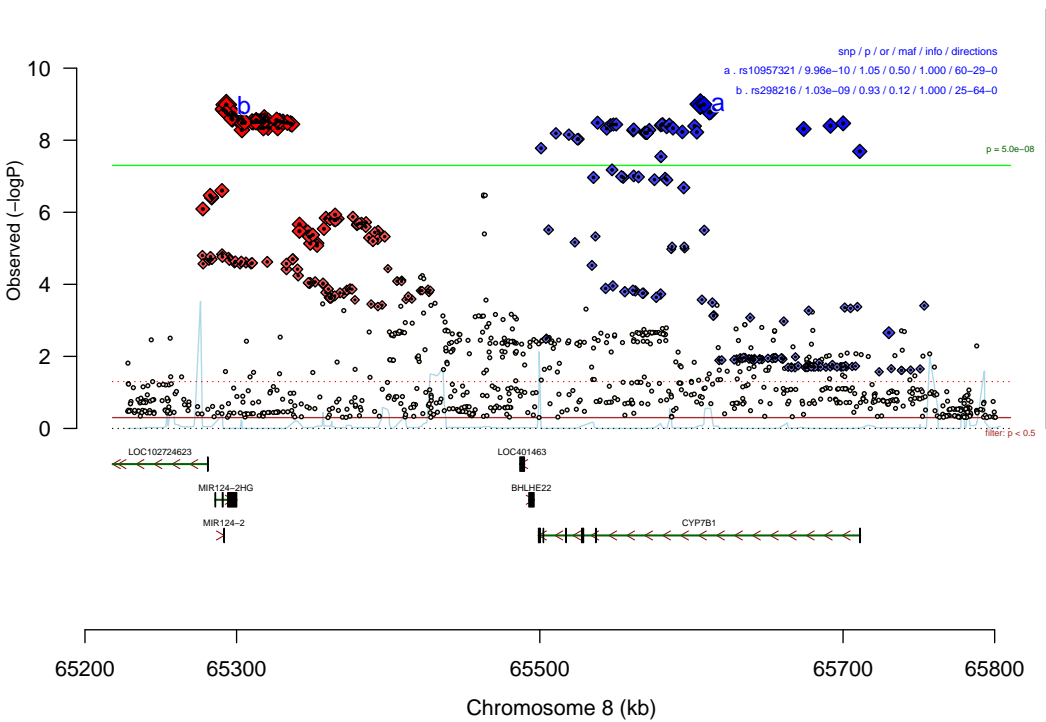

SCZ\_cond\_rs10957321-chr8

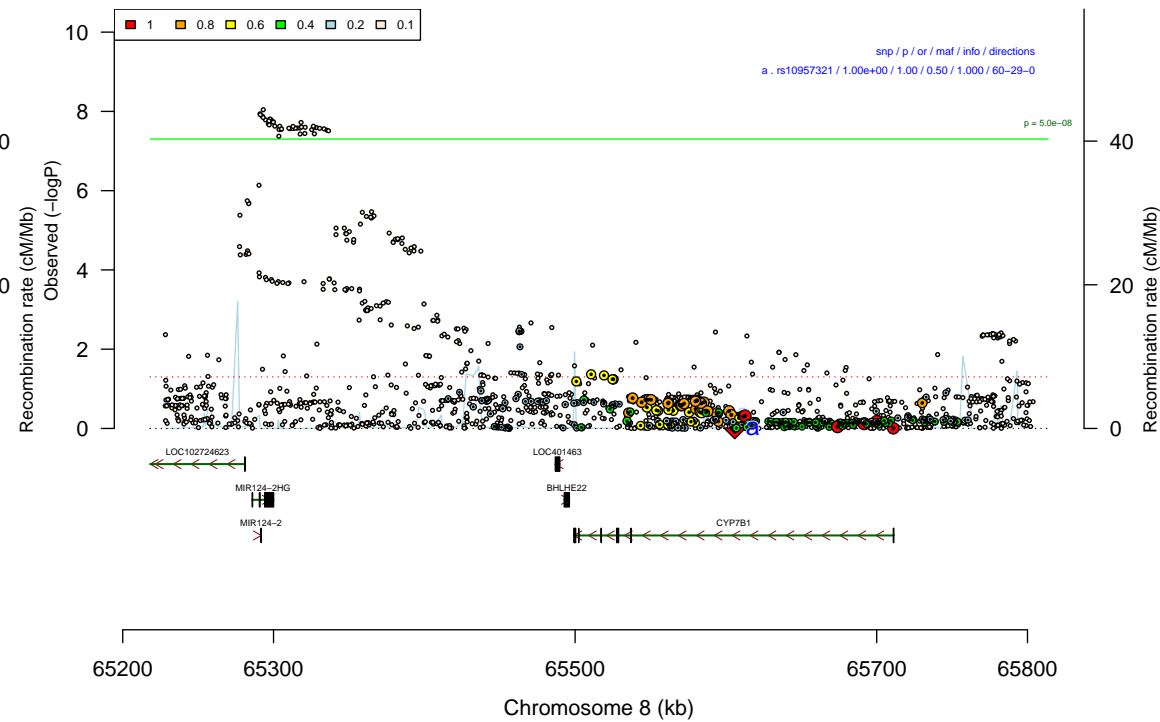

SCZ\_cond\_rs10957321-rs298216-chr8

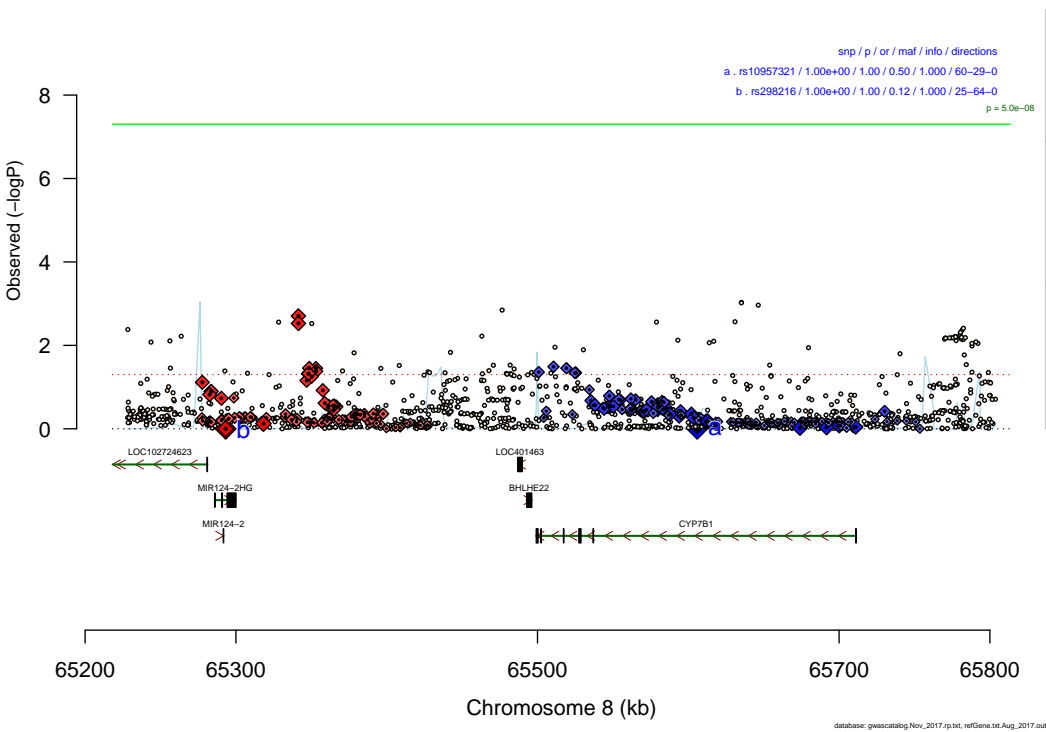



SCZ\_uncond-rs1121296-chr1

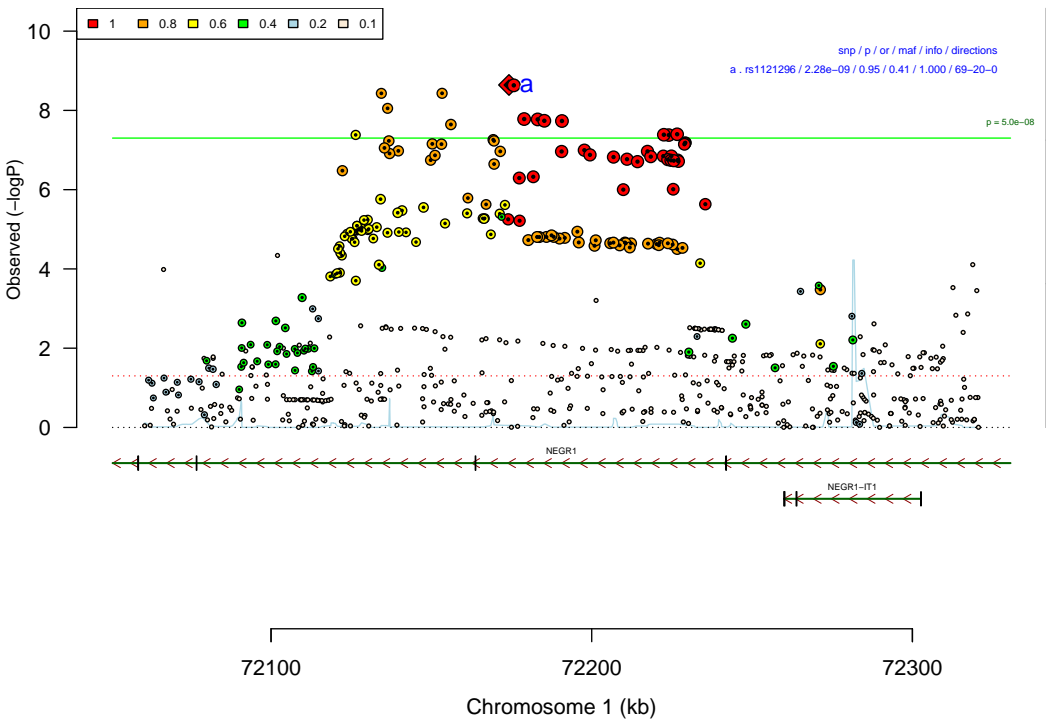

SCZ\_cond-rs1121296-chr1

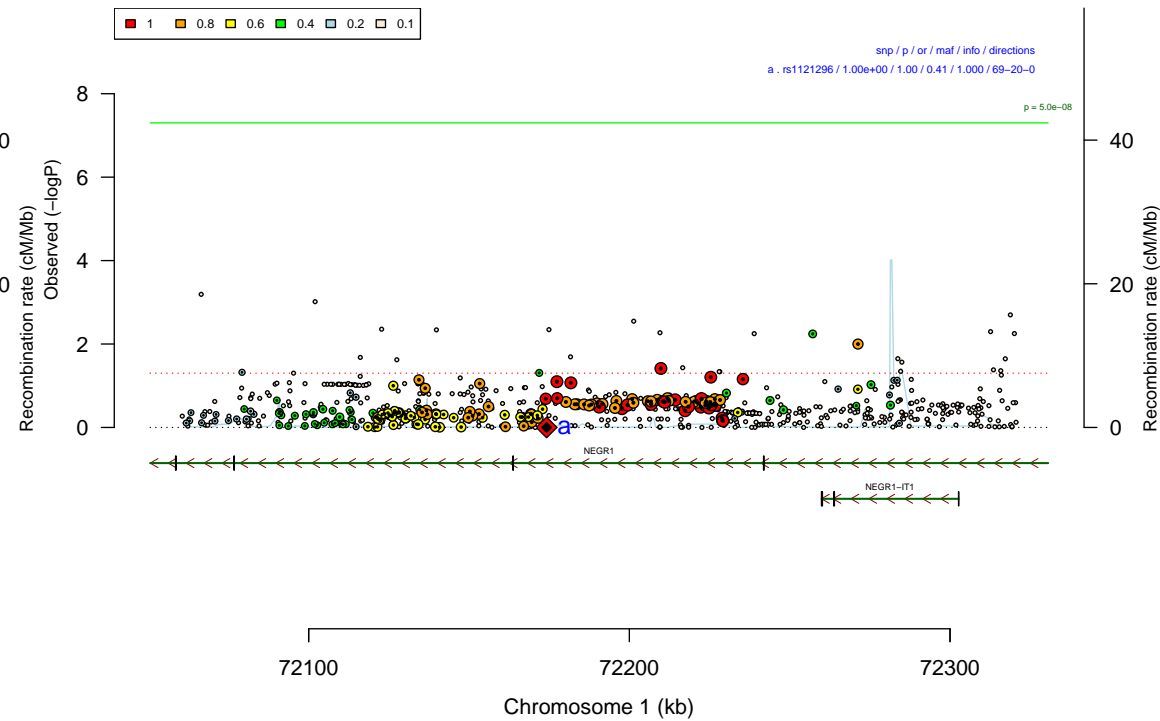

SCZ\_uncond-rs498591-chr9

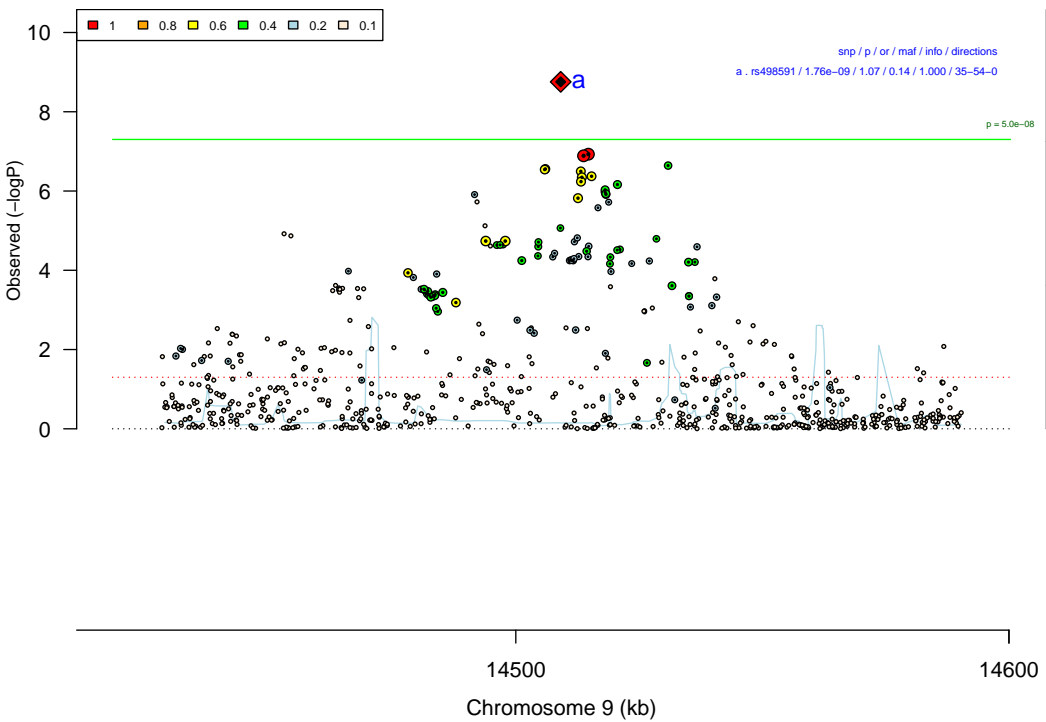

SCZ\_cond-rs498591-chr9

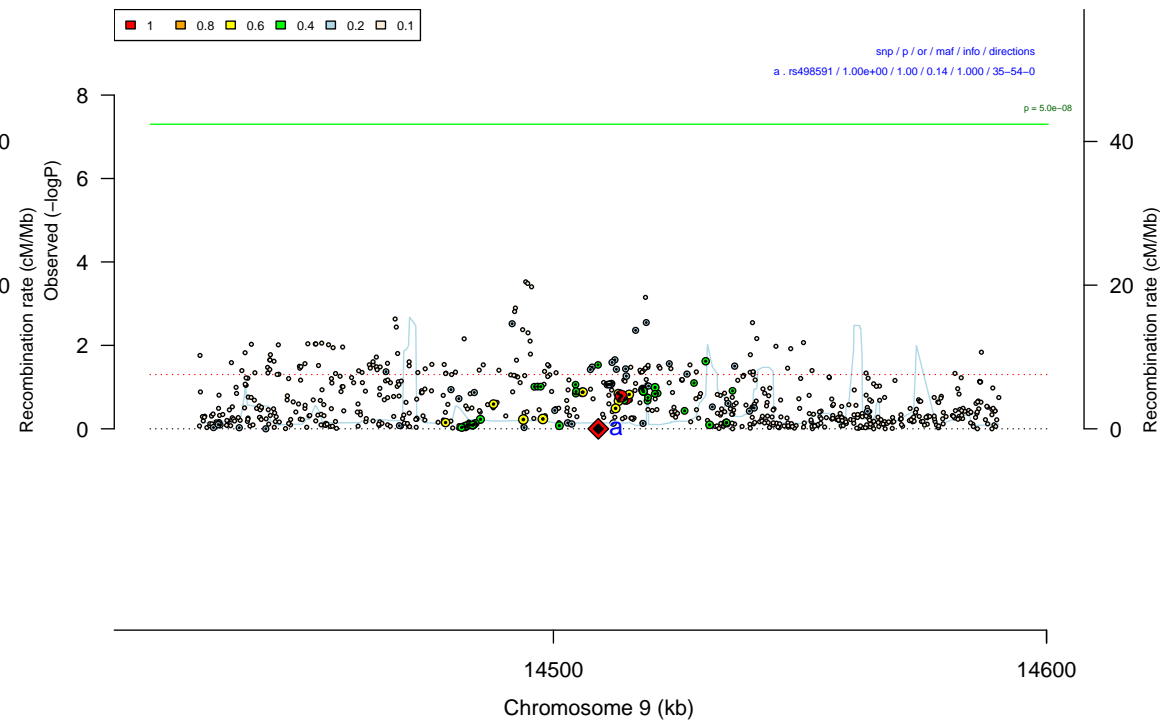

SCZ\_uncond-rs72974269-chr2

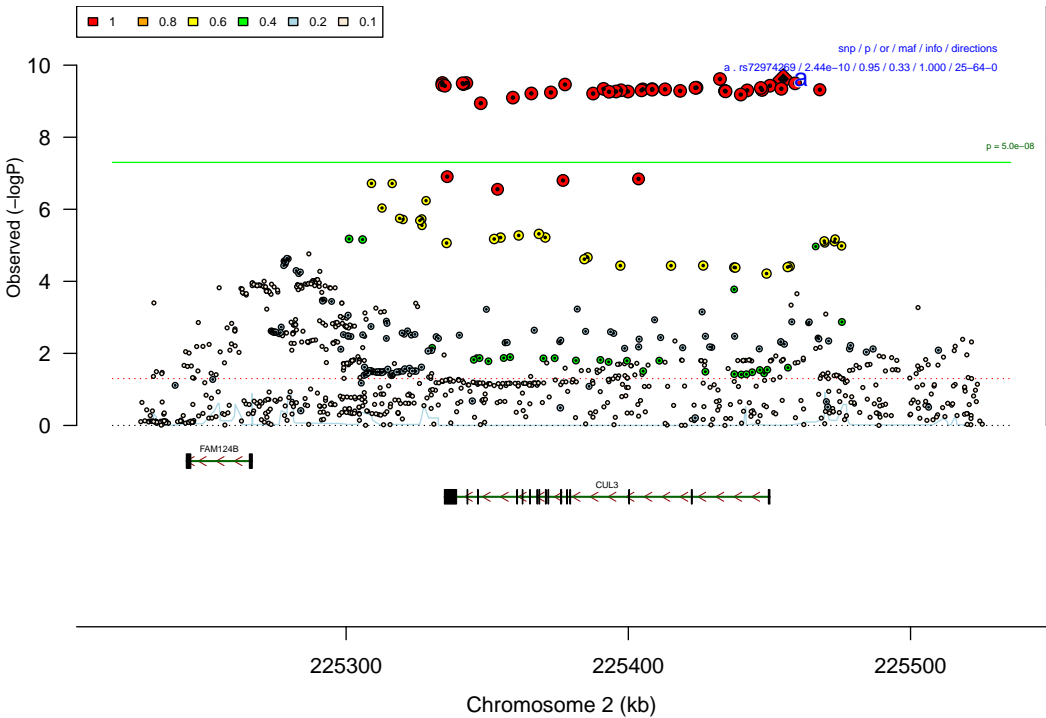

SCZ\_cond-rs72974269-chr2

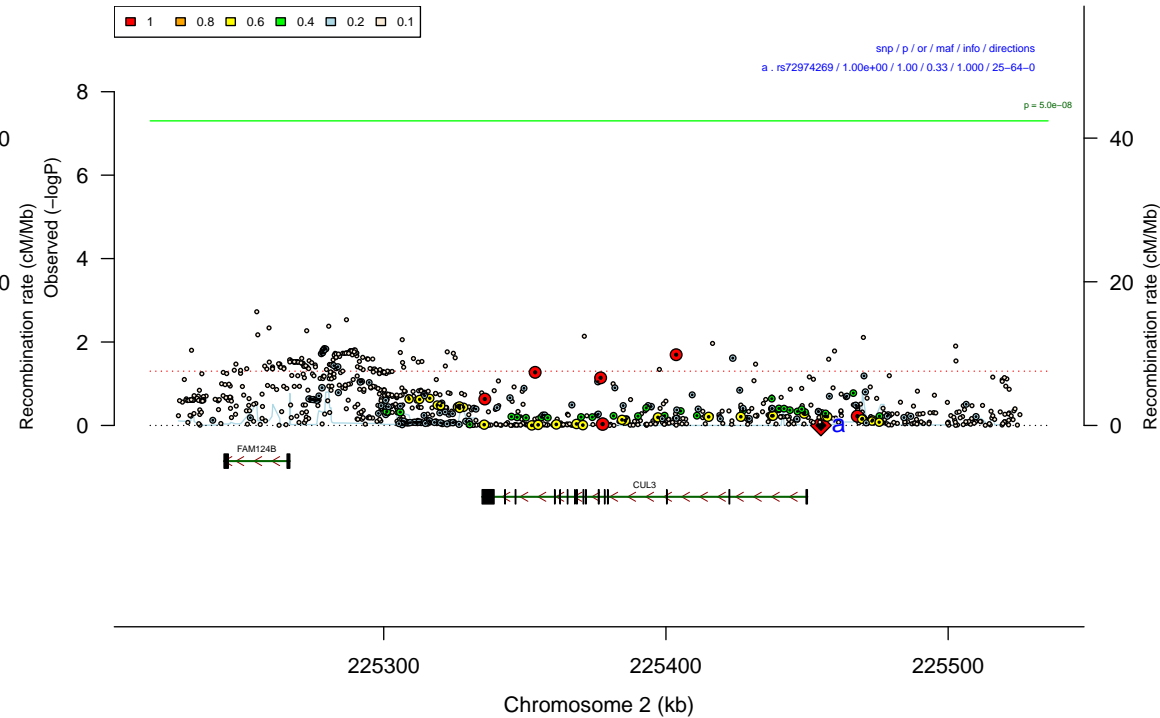

SCZ\_uncond-rs10767734-chr11

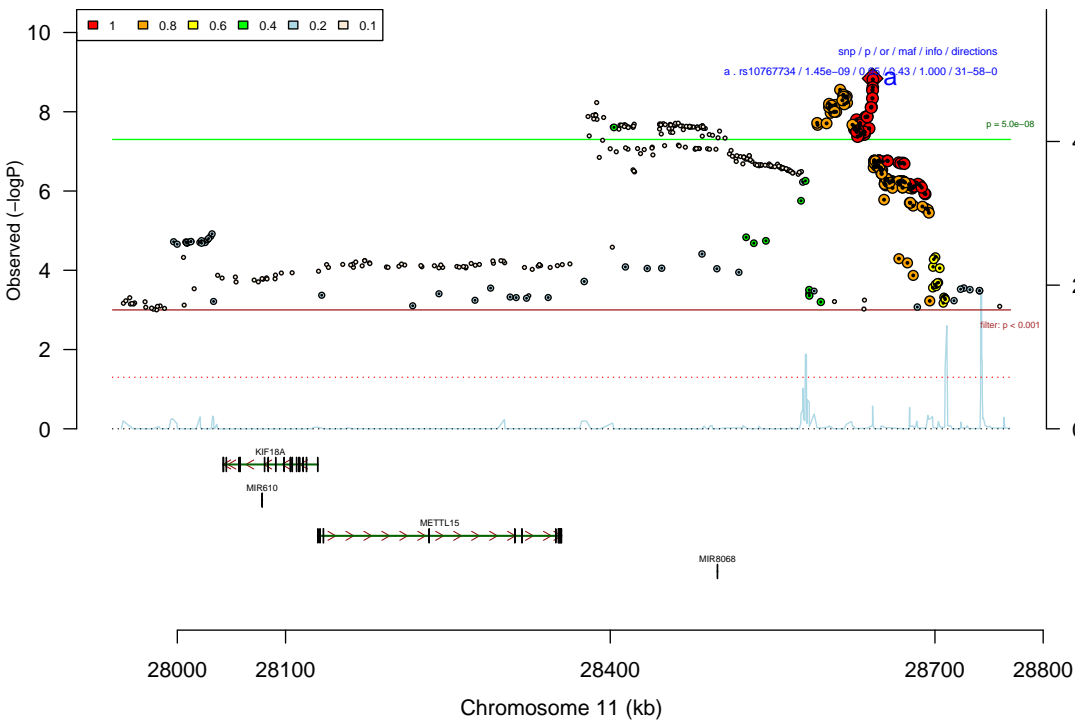

SCZ\_cond-rs10767734-chr11

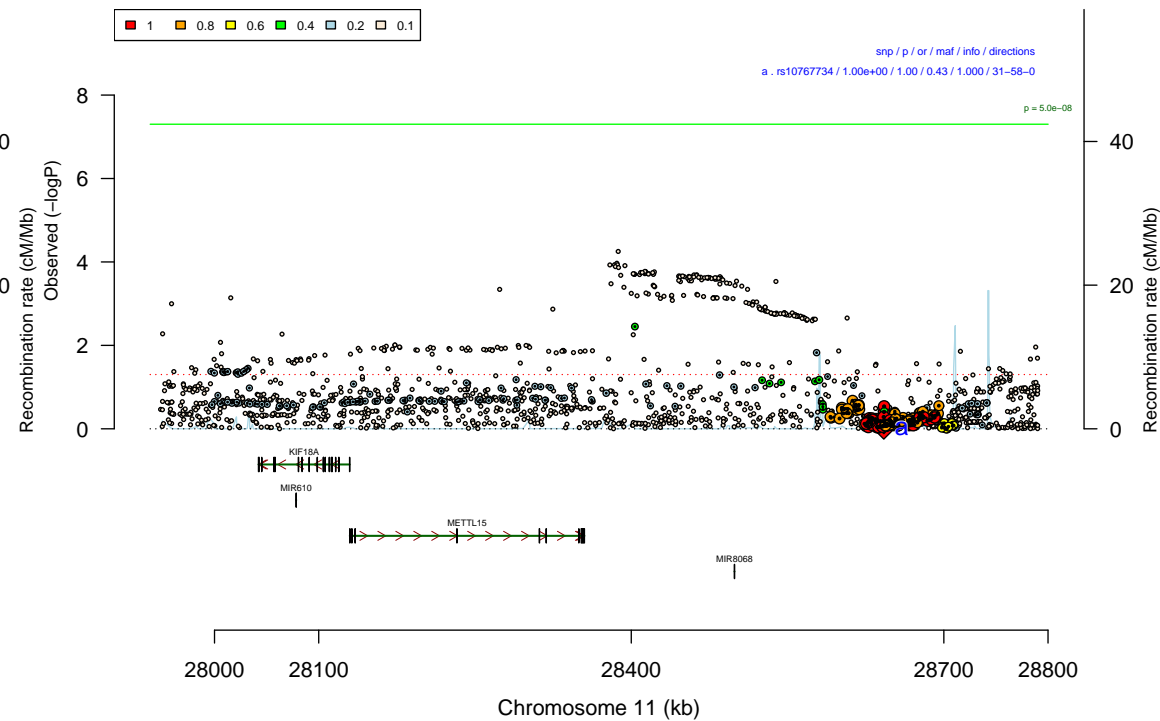

SCZ\_uncond-rs2153960-chr6

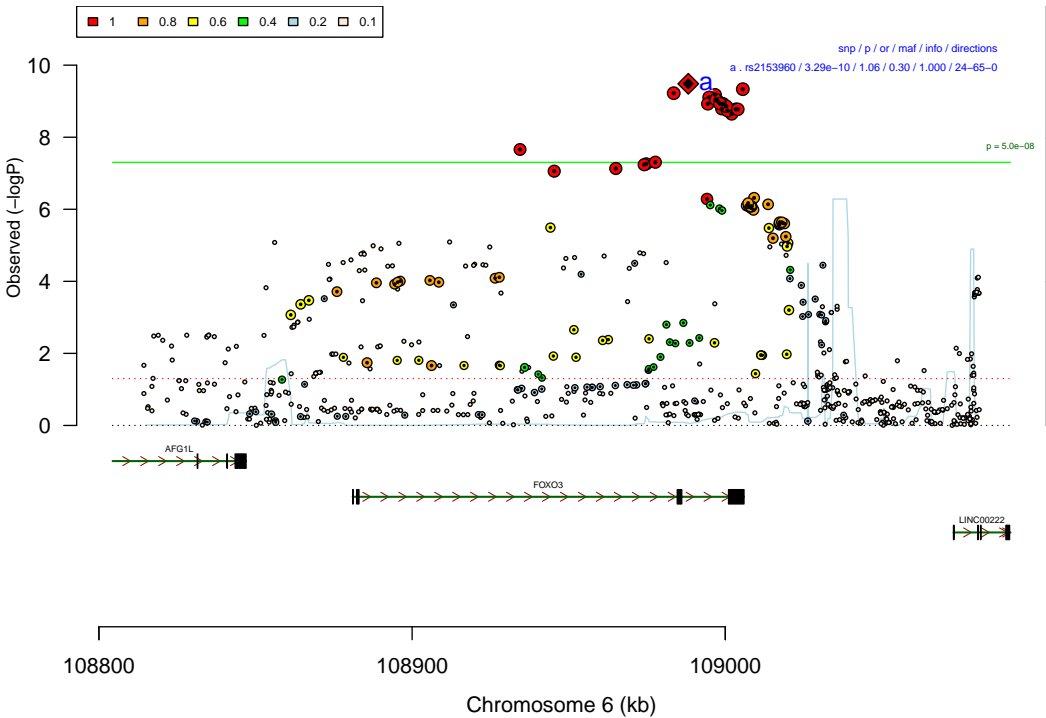

SCZ\_cond-rs2153960-chr6

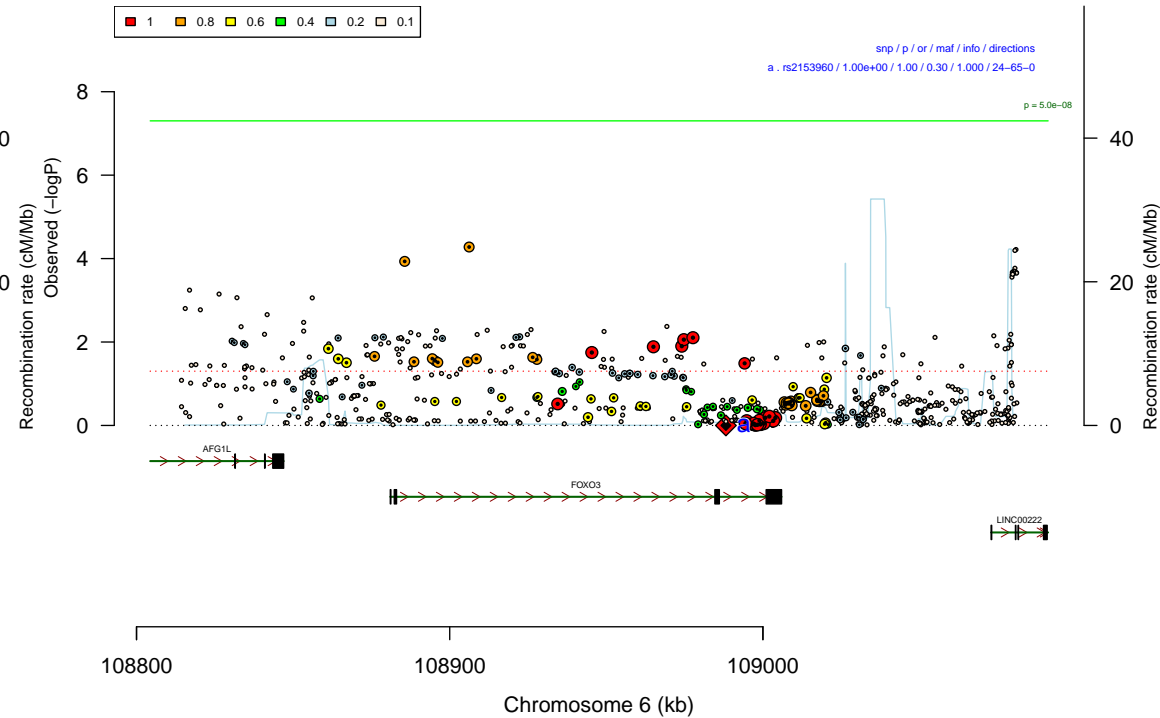

SCZ\_uncond-rs1463209-chr12

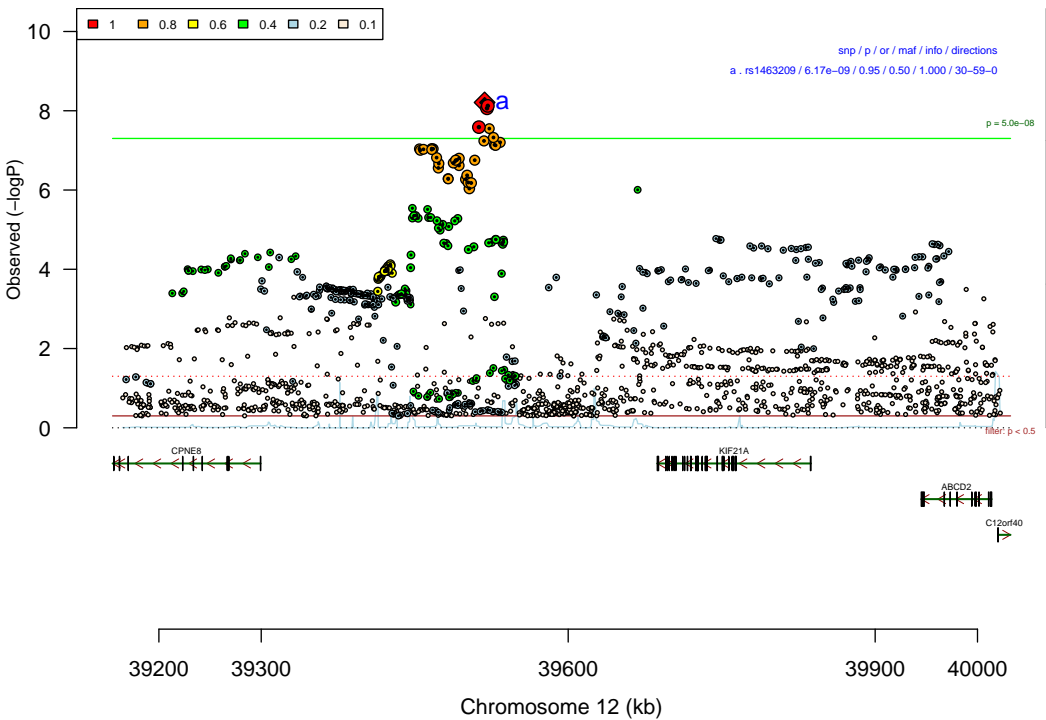

SCZ\_cond-rs1463209-chr12

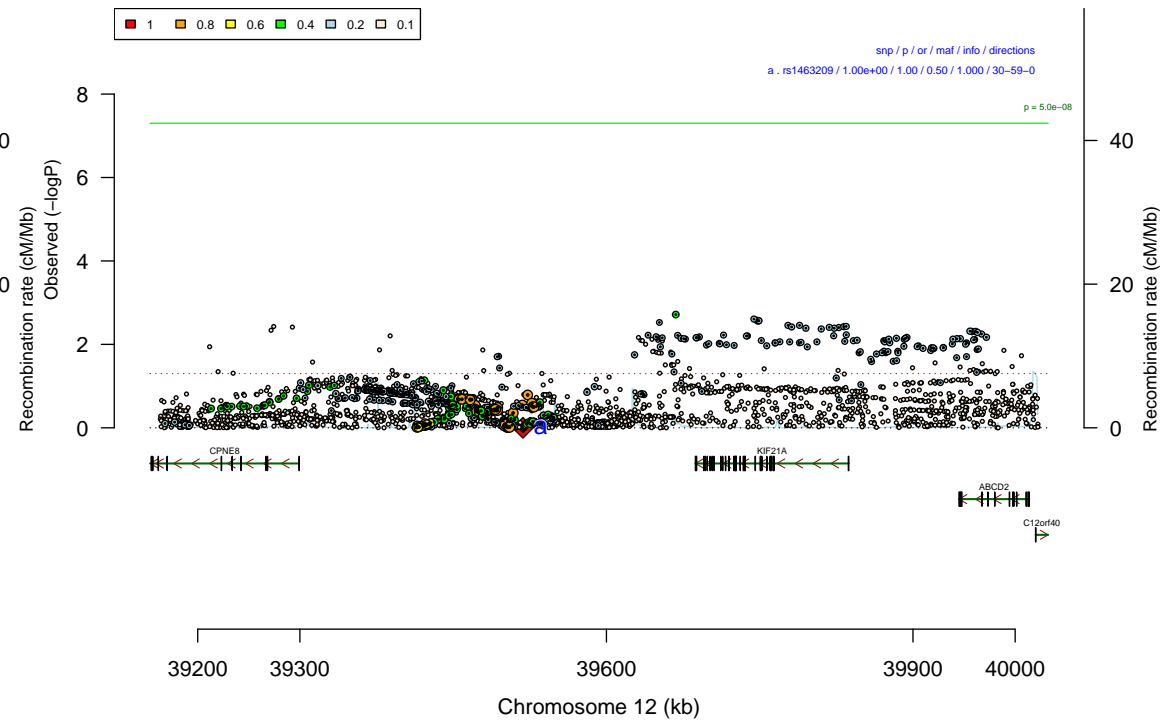

SCZ\_uncond-rs11121172-chr1

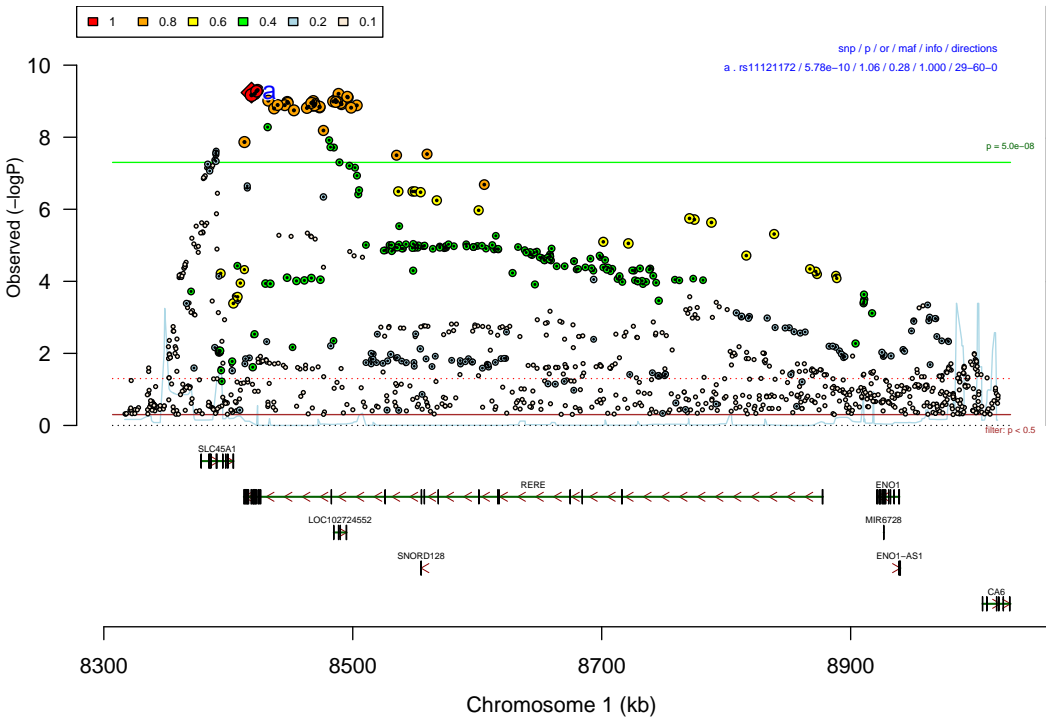

SCZ\_cond-rs11121172-chr1

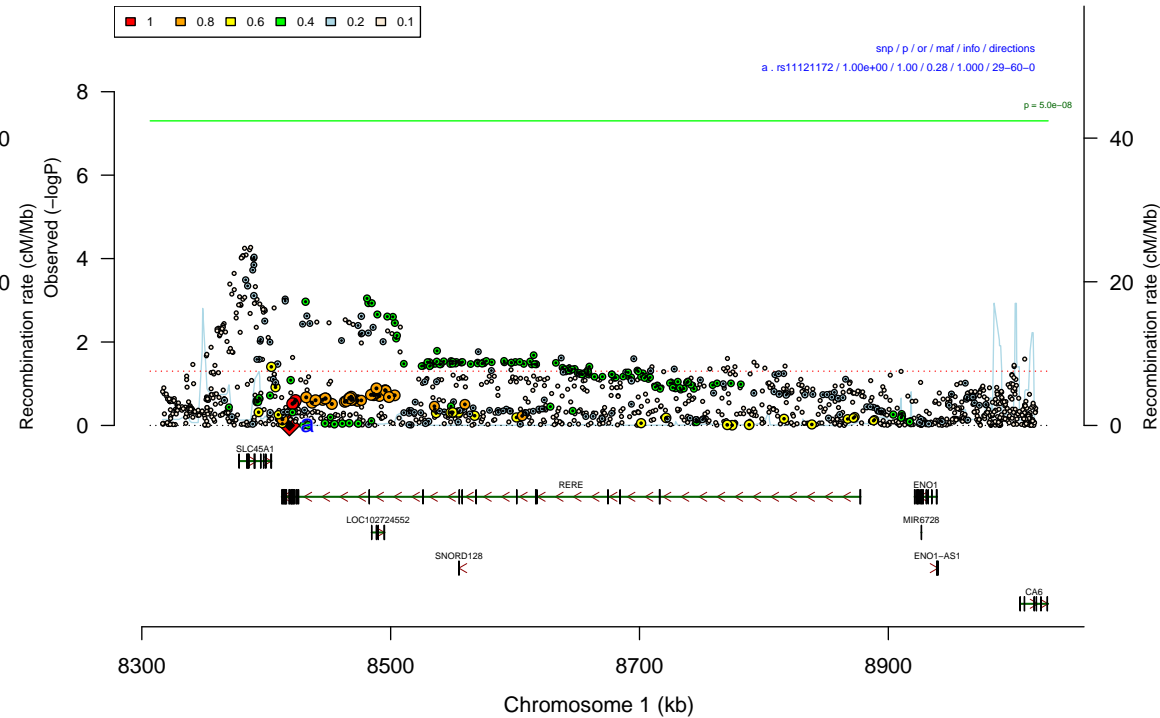

SCZ\_uncond-rs2649999-chr12

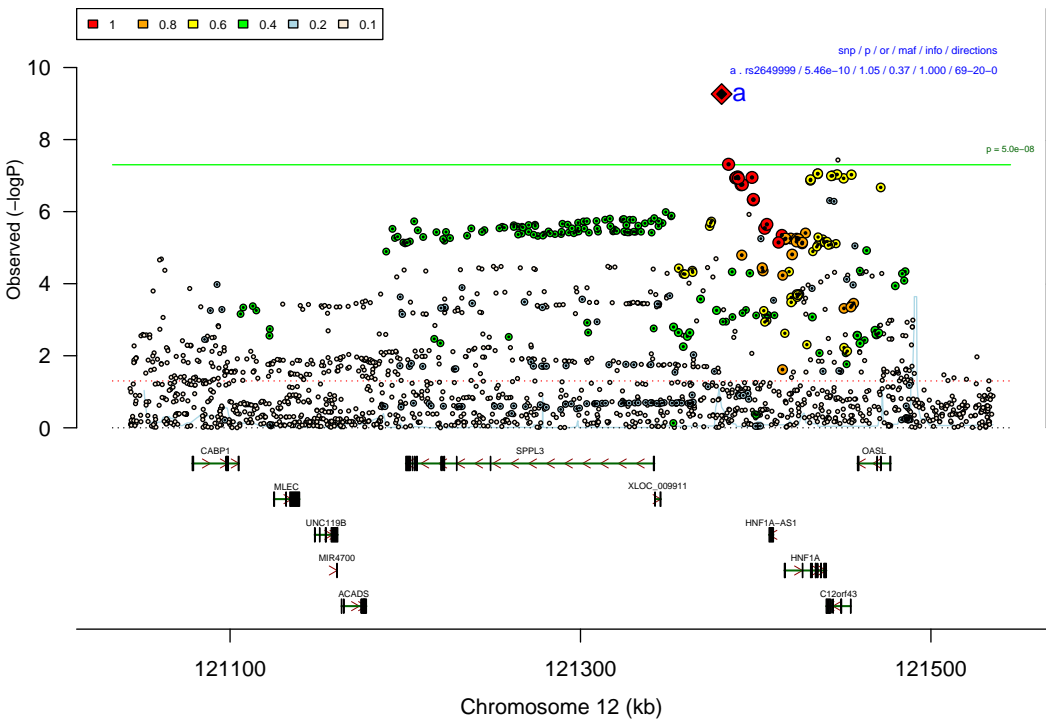

SCZ\_cond-rs2649999-chr12

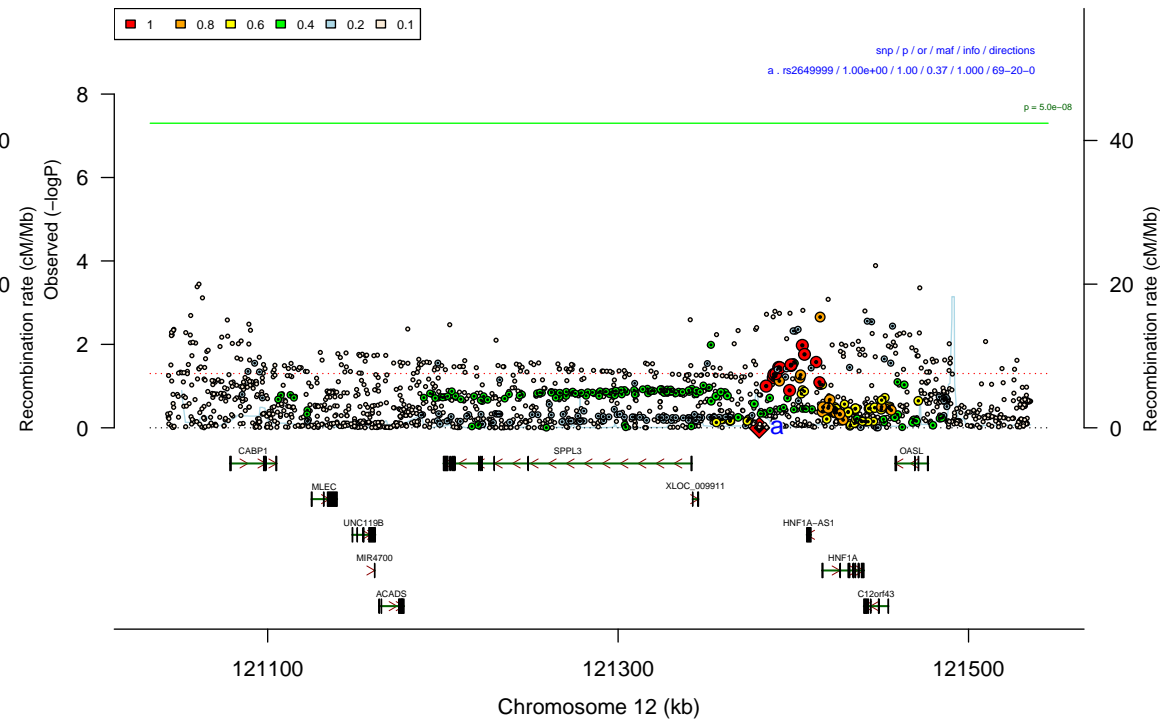

SCZ\_uncond-rs7816998-chr8

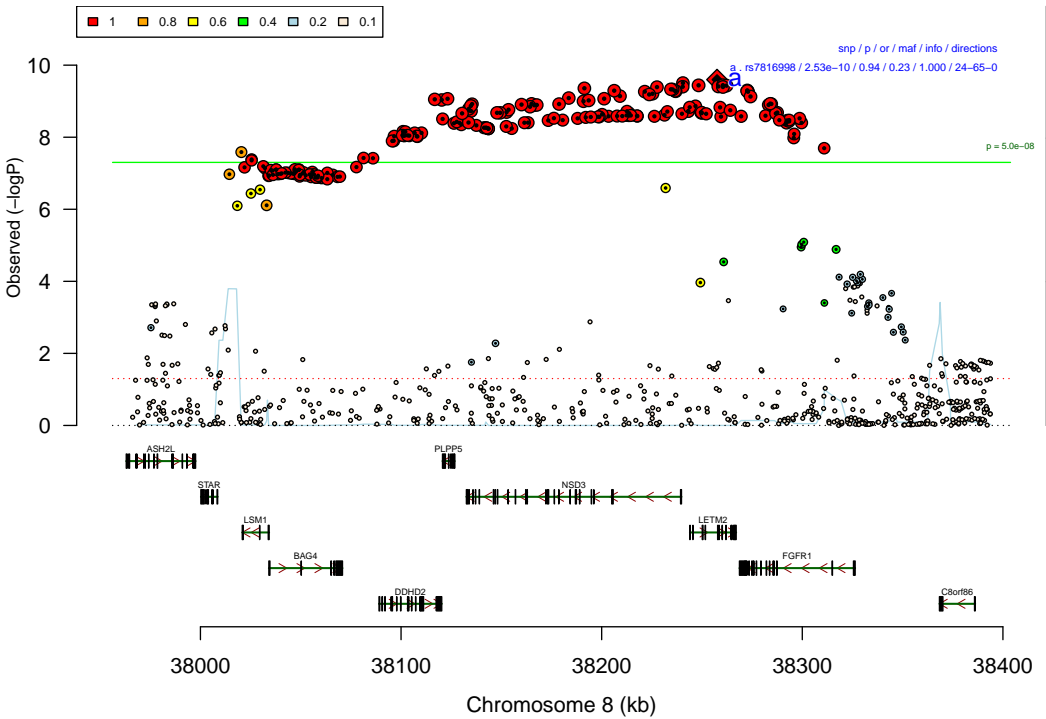

SCZ\_cond-rs7816998-chr8

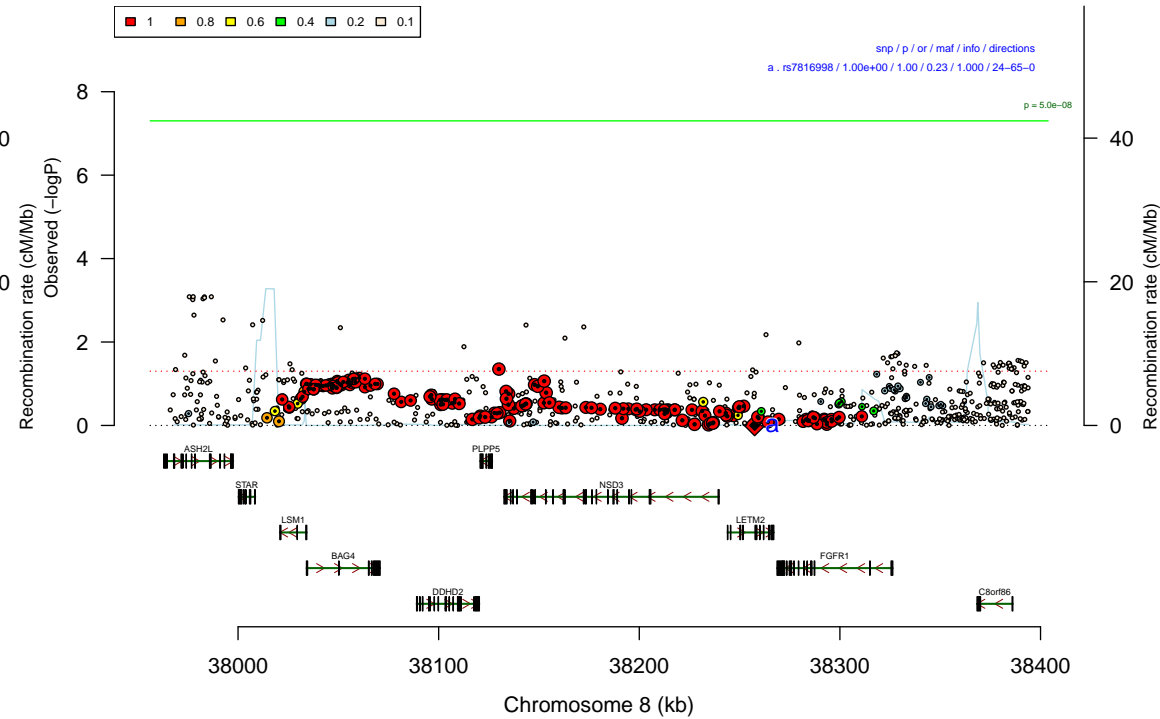

SCZ\_uncond-rs73292401-chr17

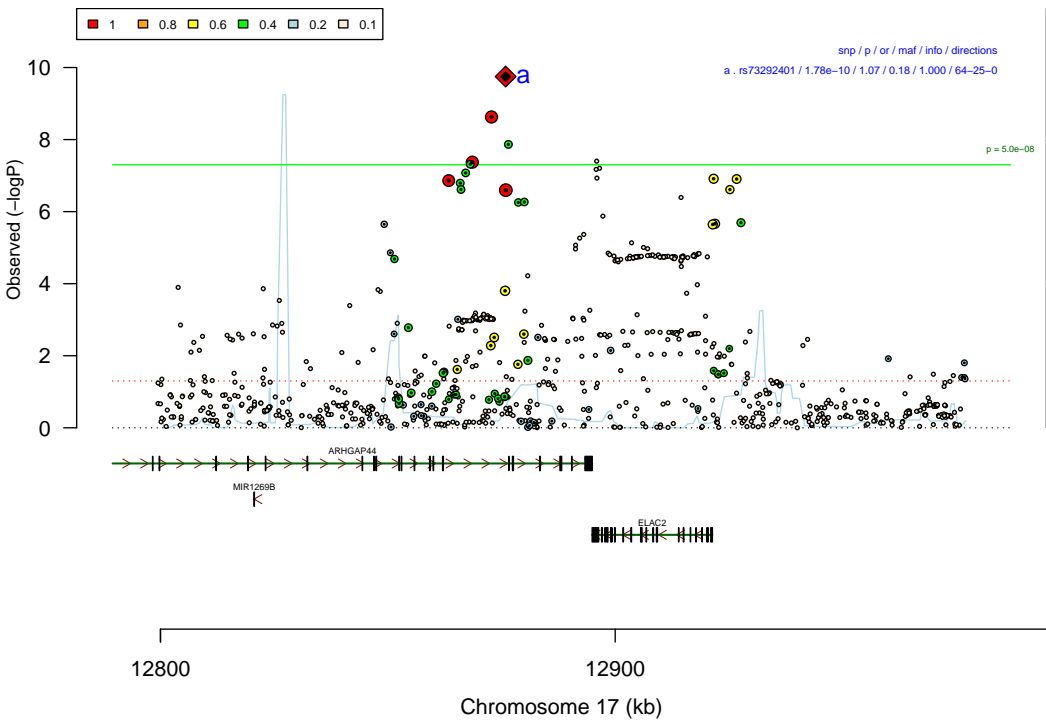

SCZ\_cond-rs73292401-chr17

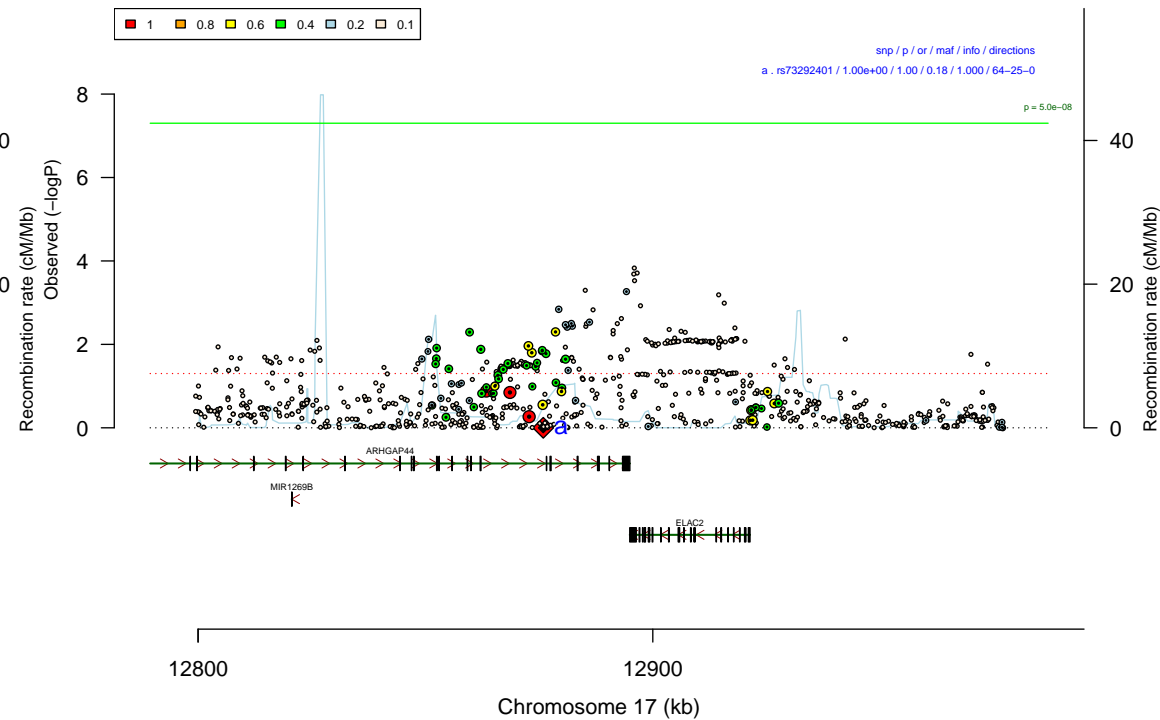

SCZ\_uncond-rs8175378-chr5

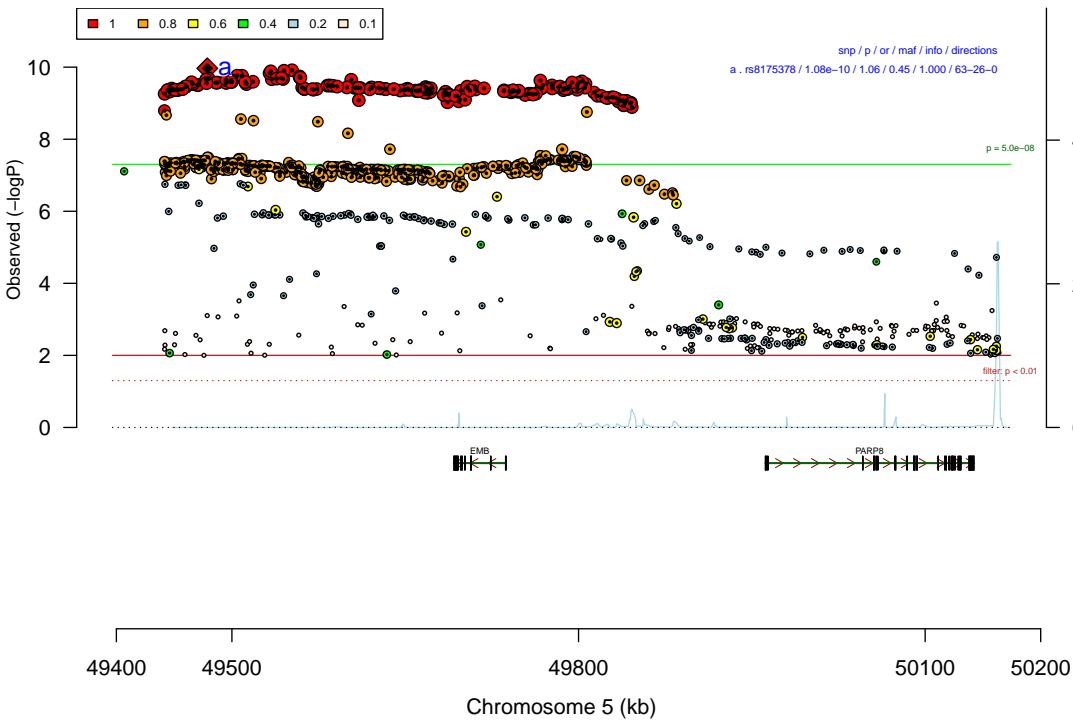

SCZ\_cond-rs8175378-chr5

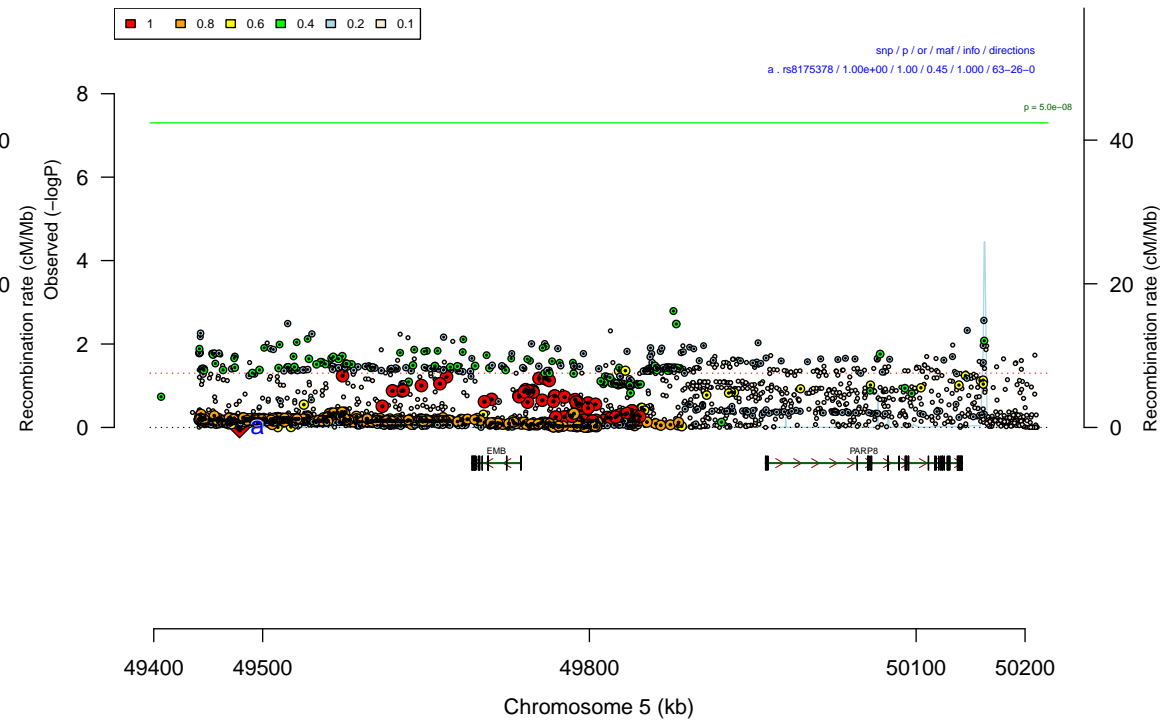

SCZ\_uncond-rs704364-chr3

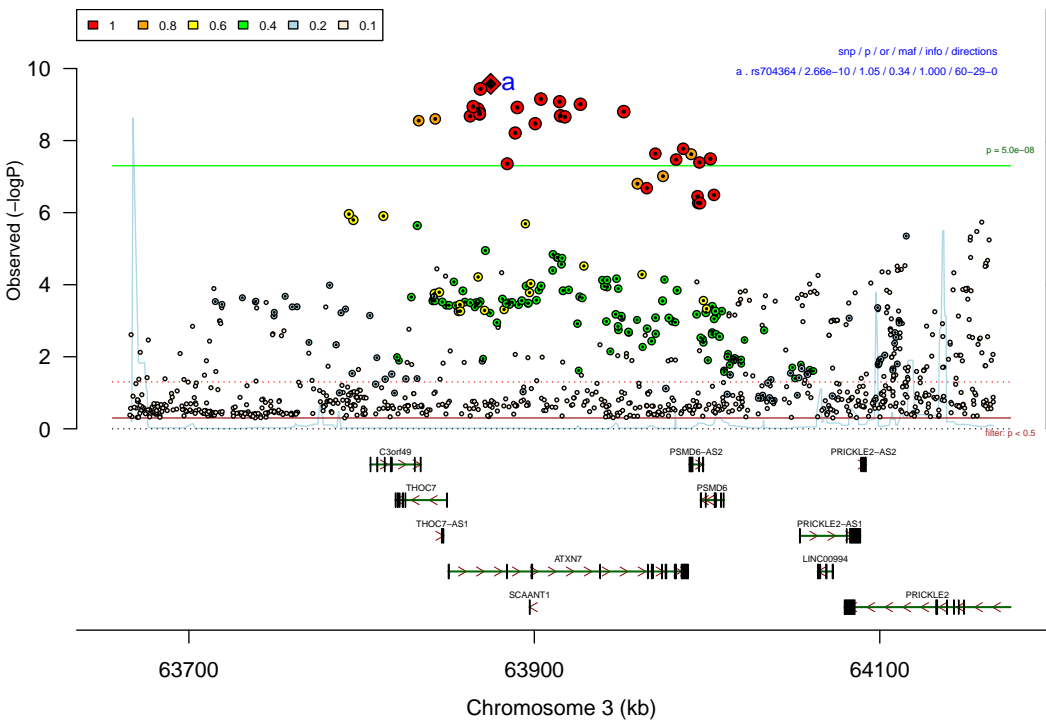

SCZ\_cond-rs704364-chr3

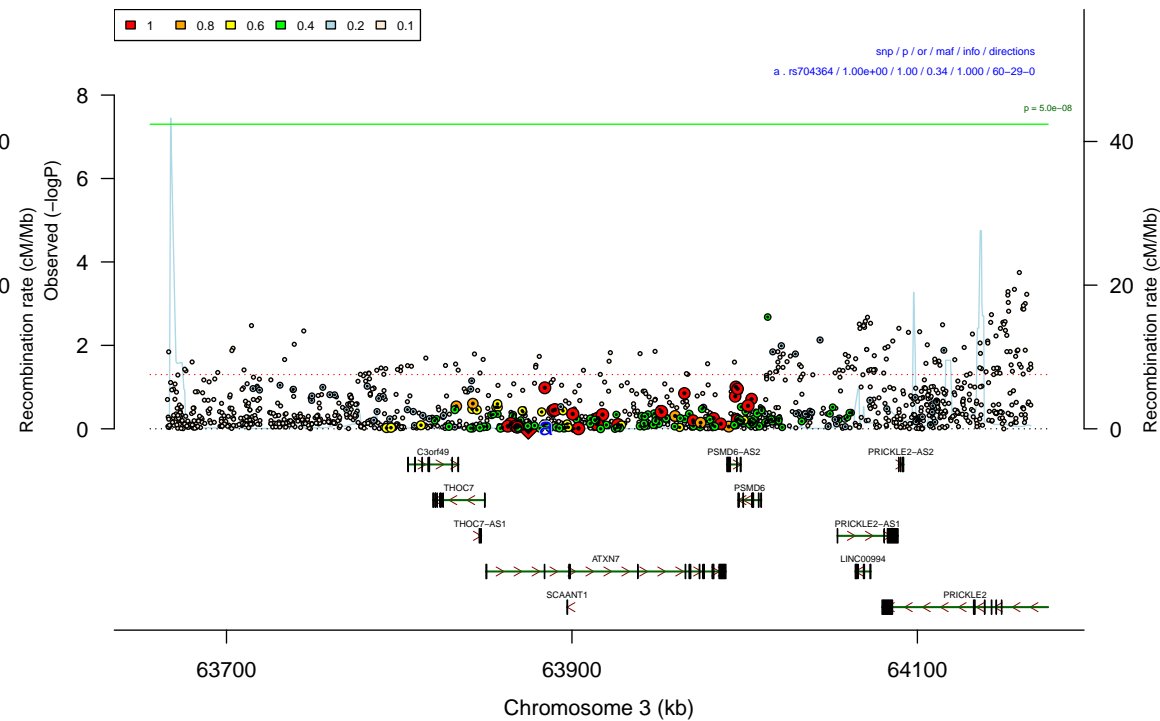





SCZ\_uncond-rs6504163-chr17

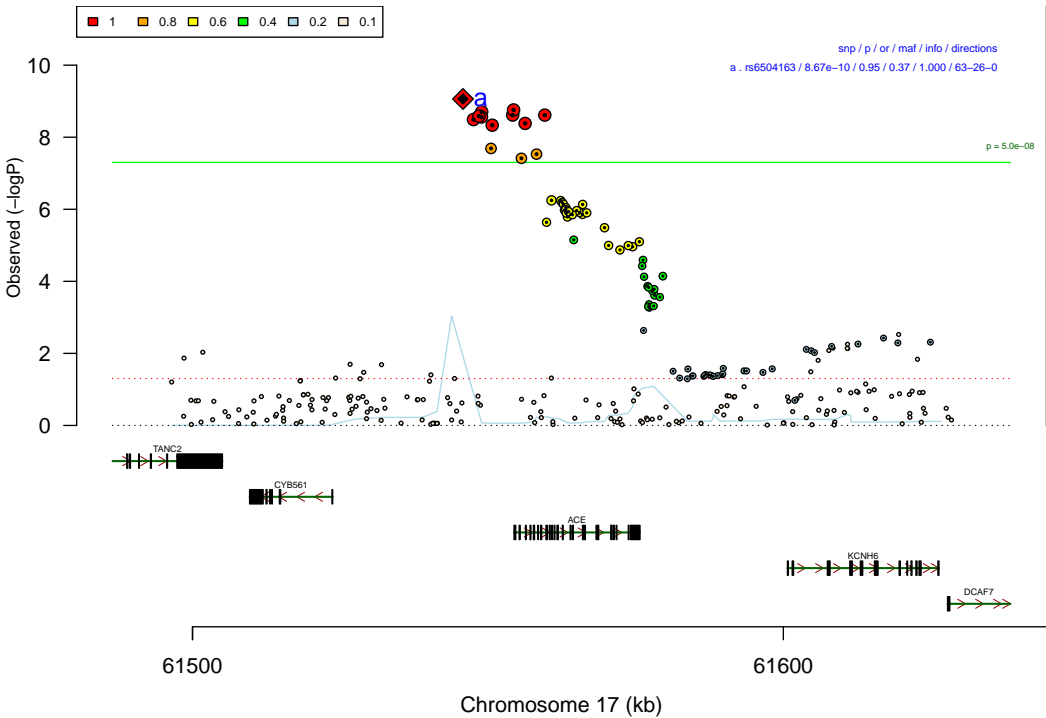

SCZ\_cond-rs6504163-chr17

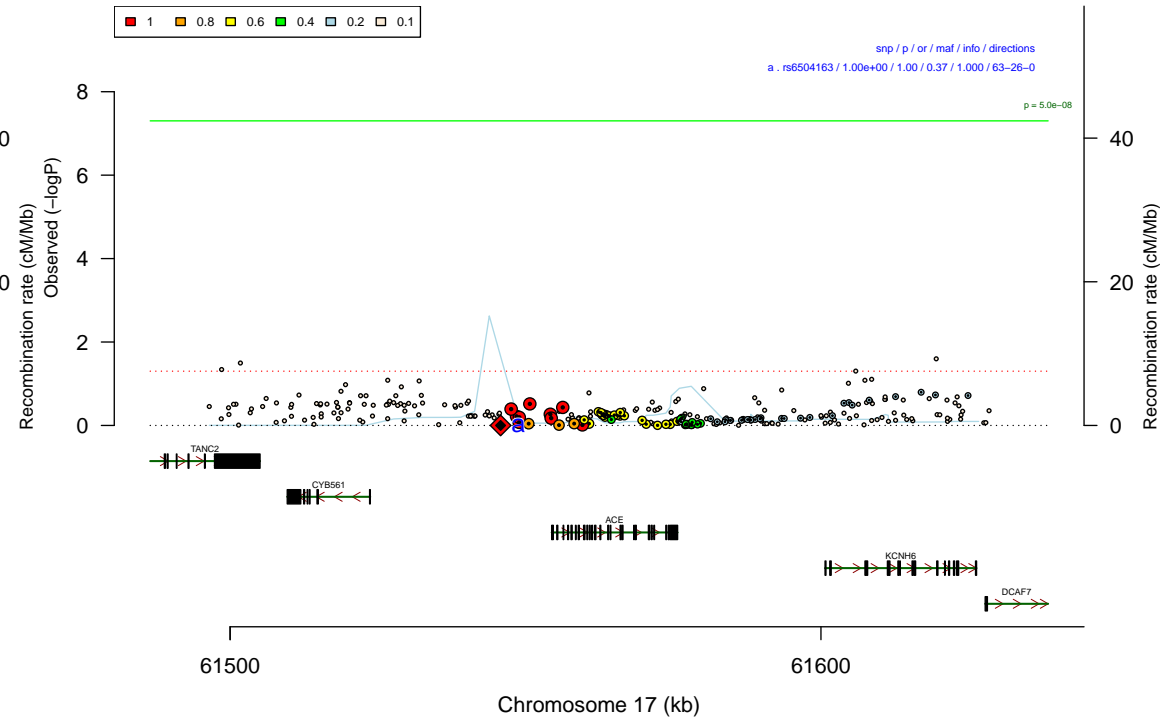

SCZ\_uncond-rs61828917-chr1

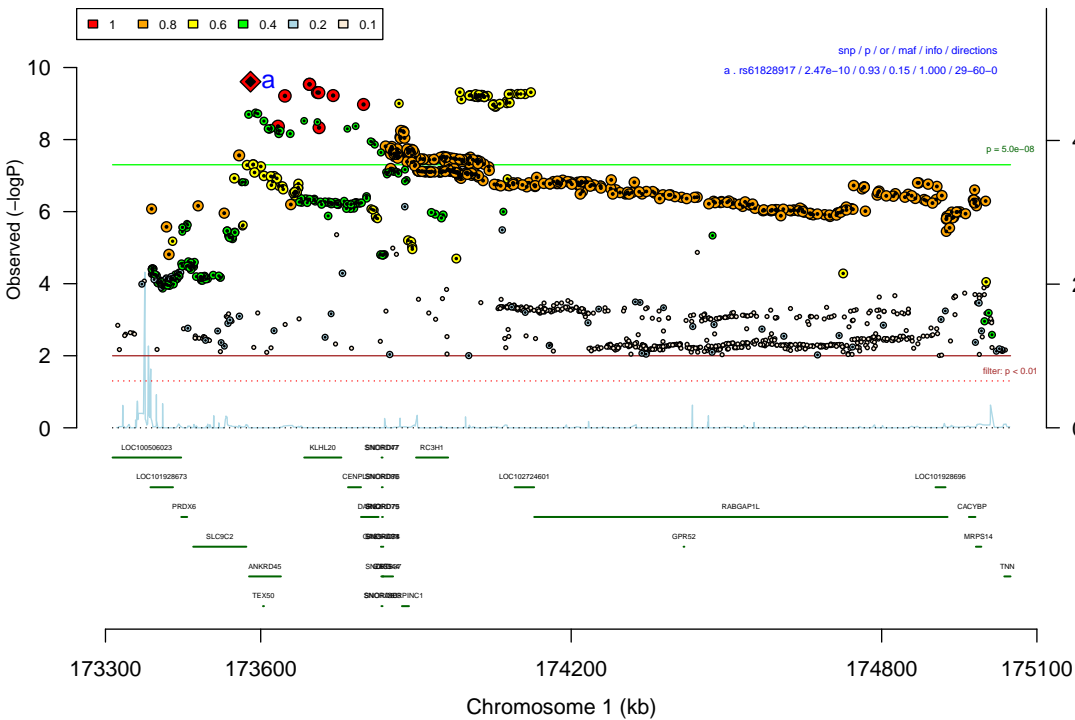

SCZ\_cond-rs61828917-chr1

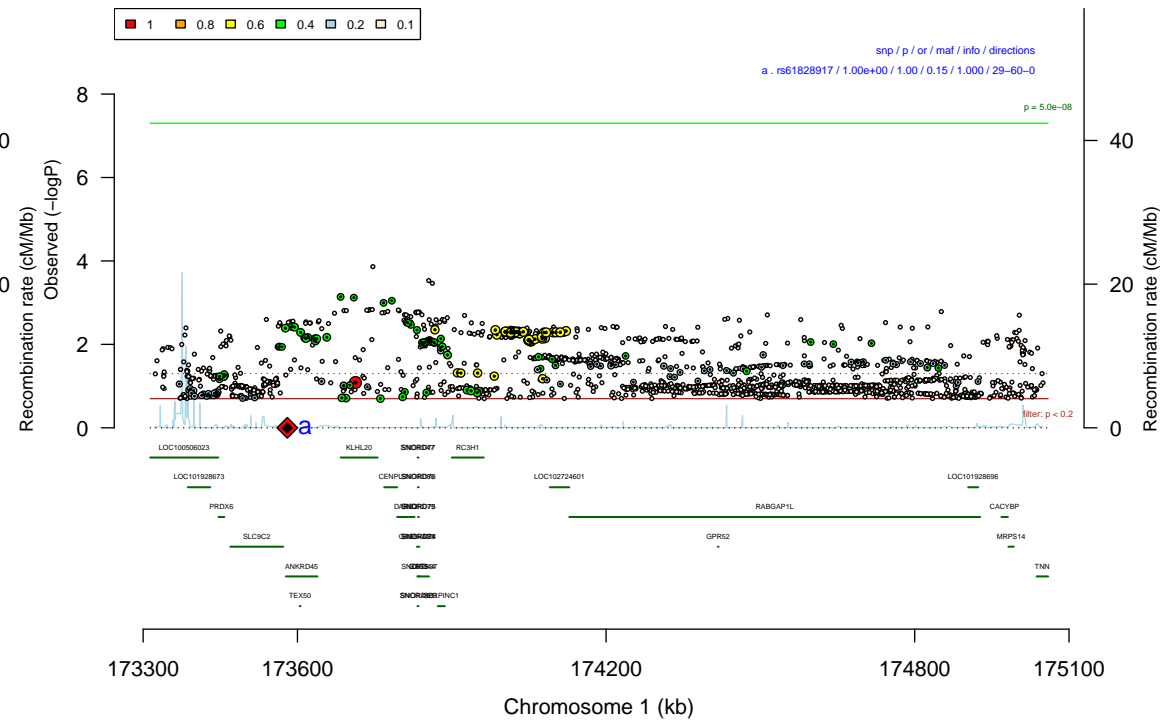



SCZ\_uncond-rs39967-chr5

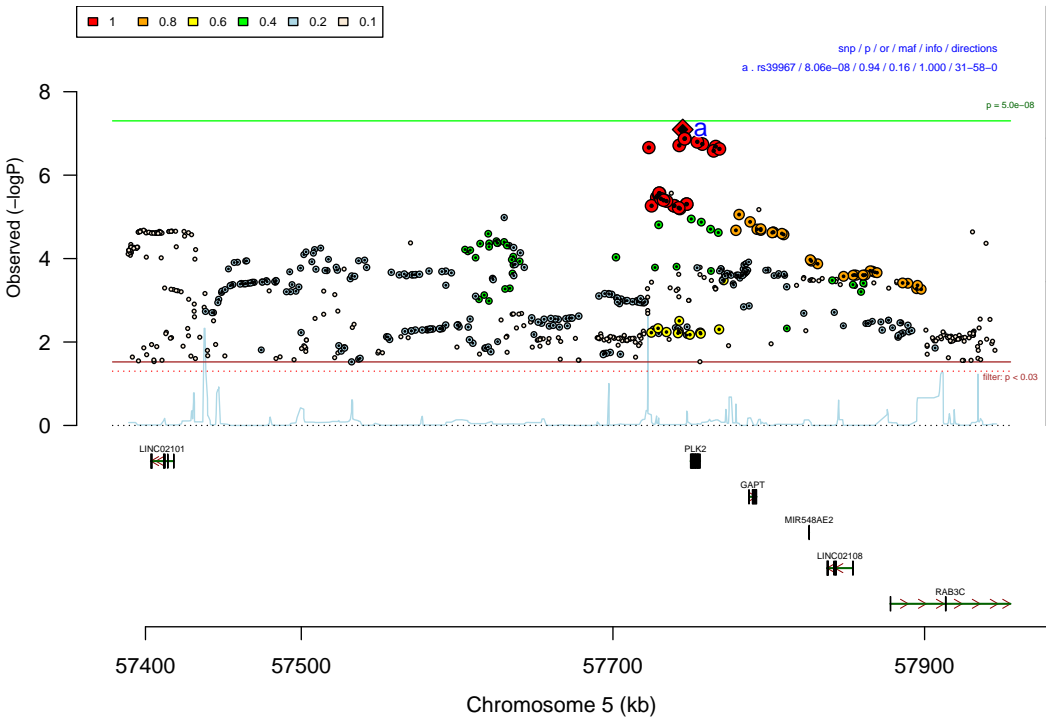

SCZ\_cond-rs39967-chr5

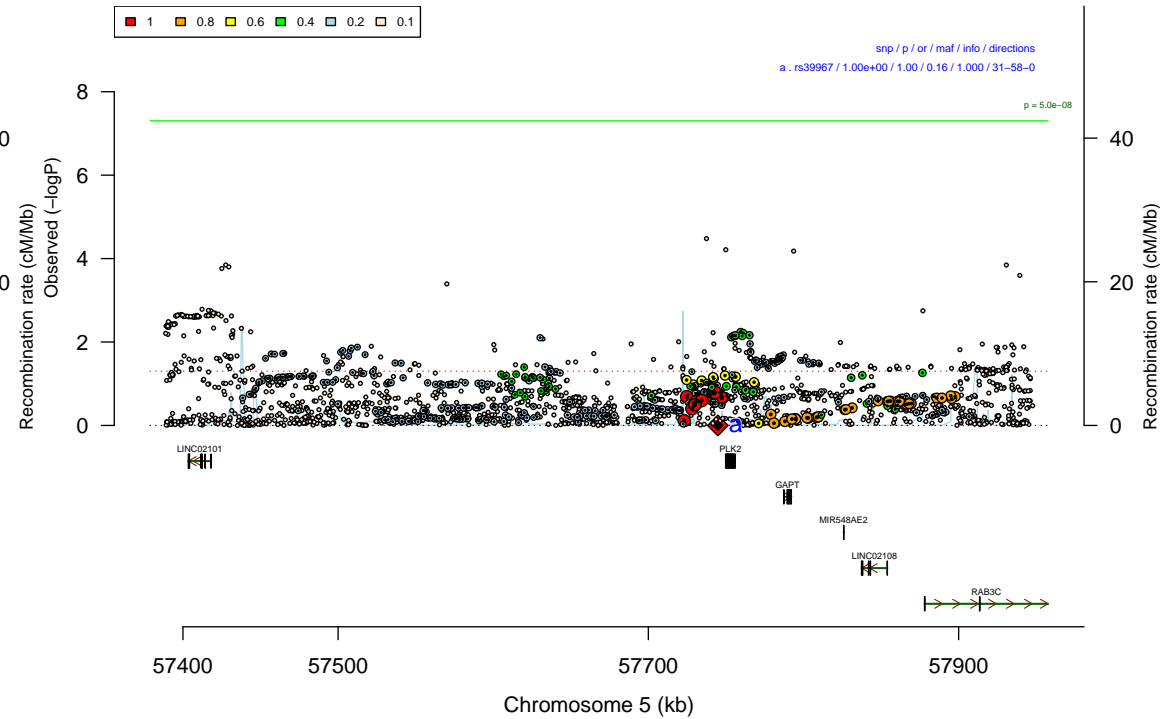

SCZ\_uncond-rs11619756-chr13

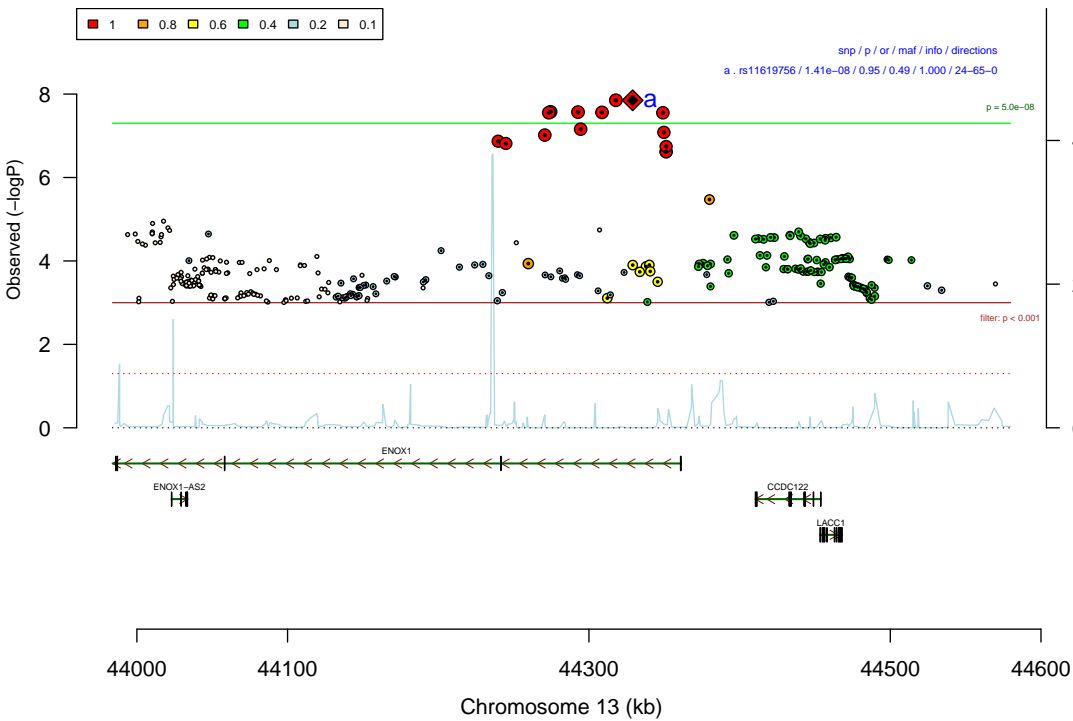

SCZ\_cond-rs11619756-chr13

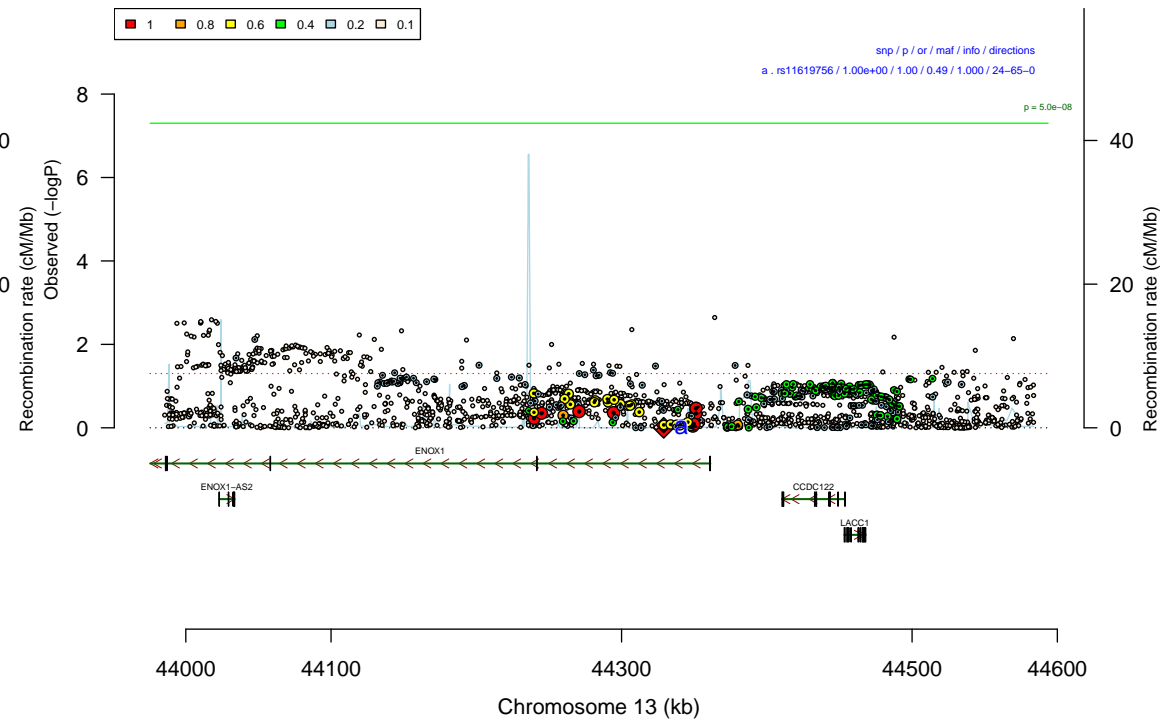

SCZ\_uncond-rs17571951-chr14

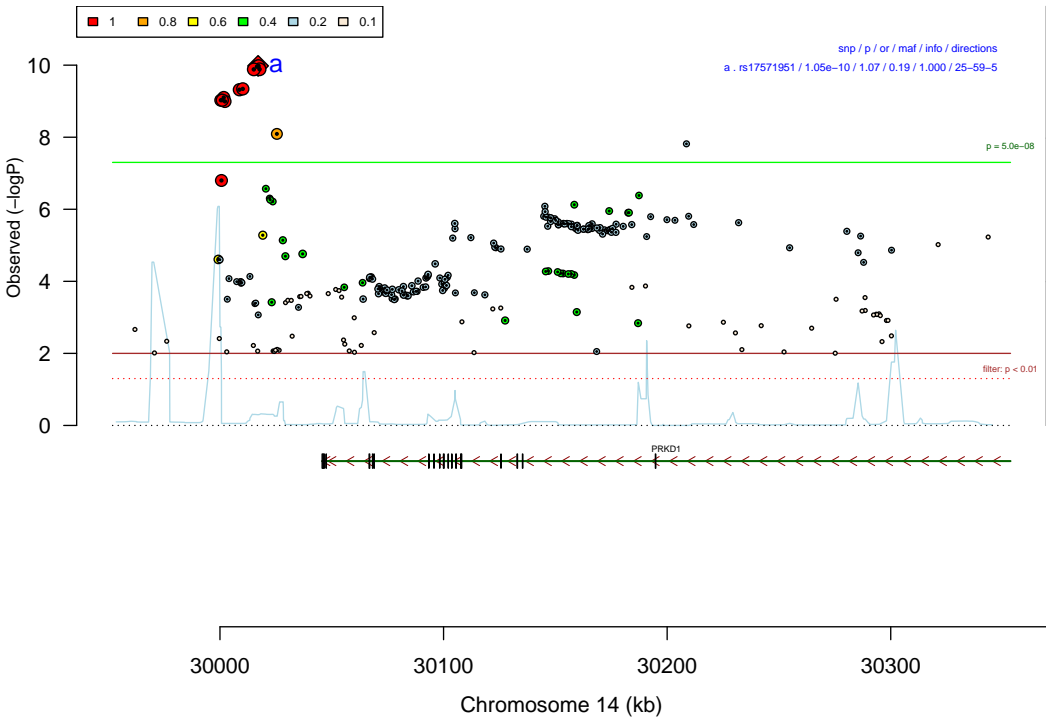

SCZ\_cond-rs17571951-chr14

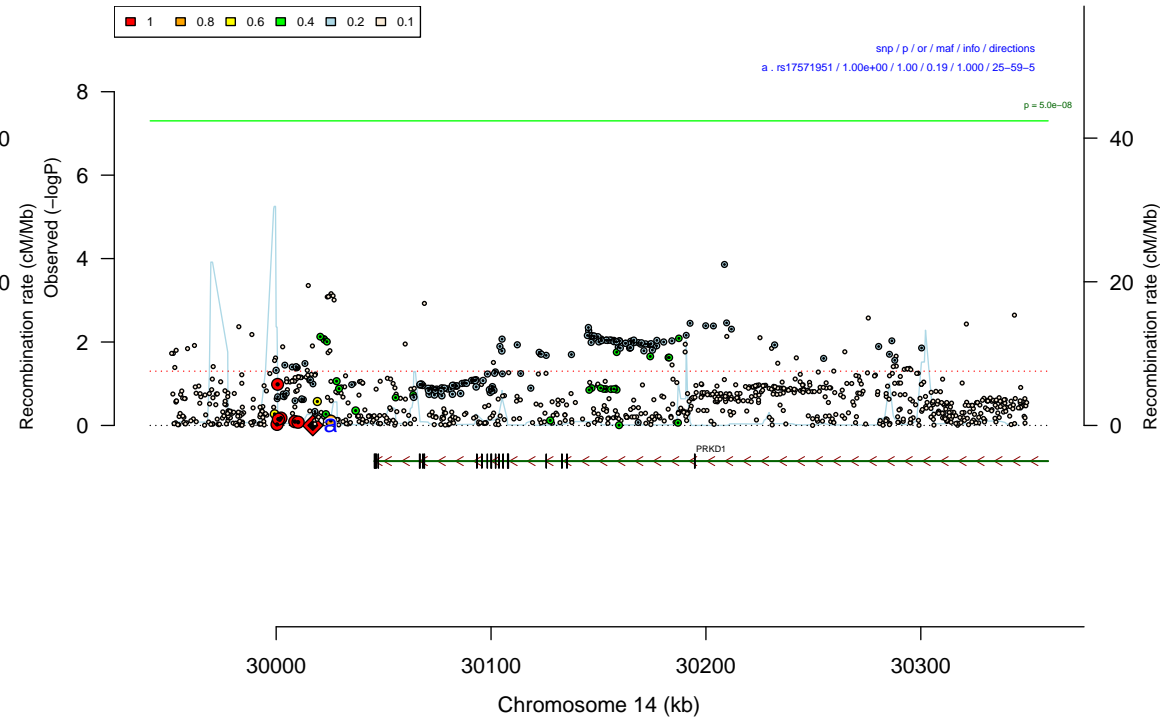

SCZ\_uncond-rs7811417-chr7

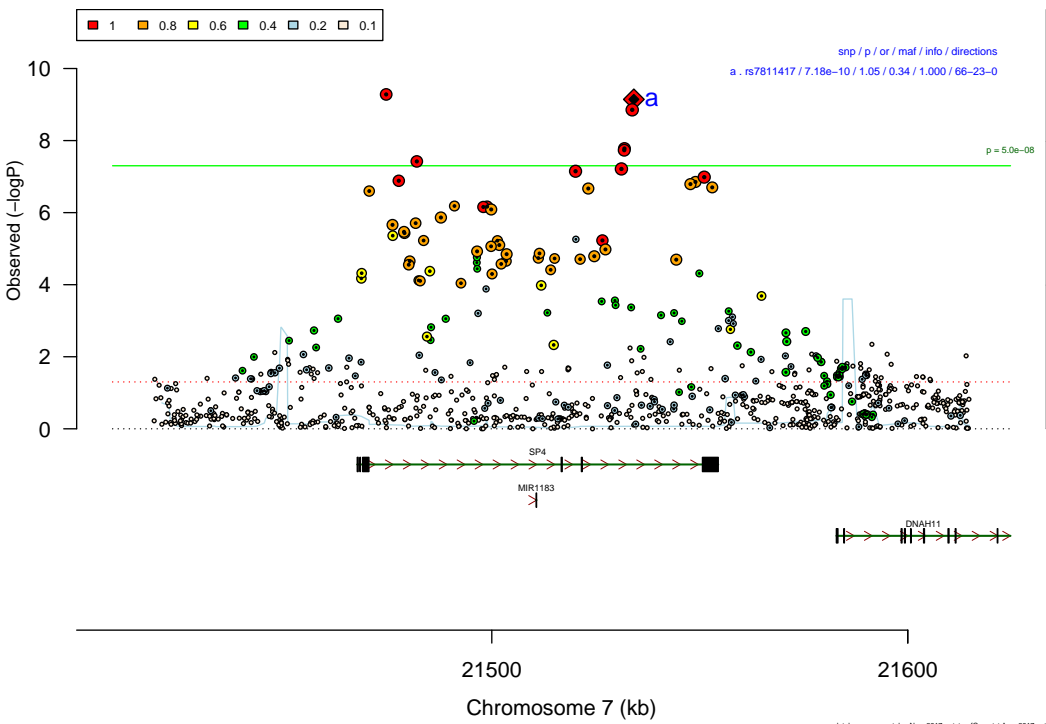

SCZ\_cond-rs7811417-chr7

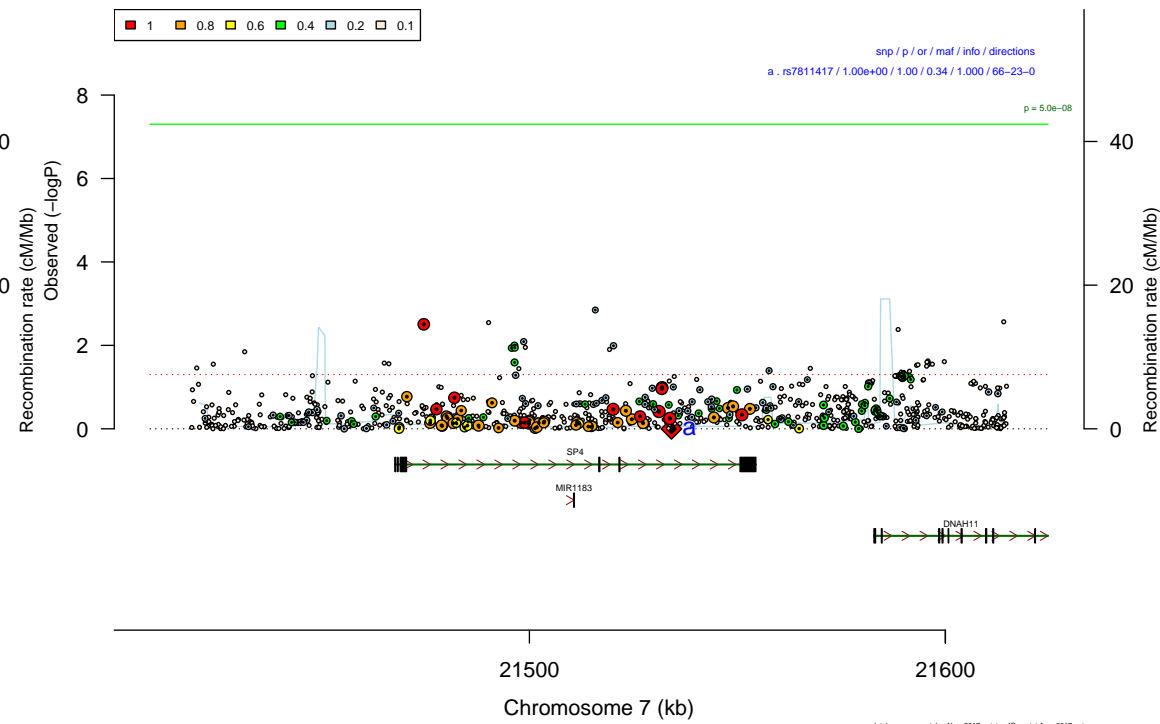

SCZ\_uncond-rs356183-chr4

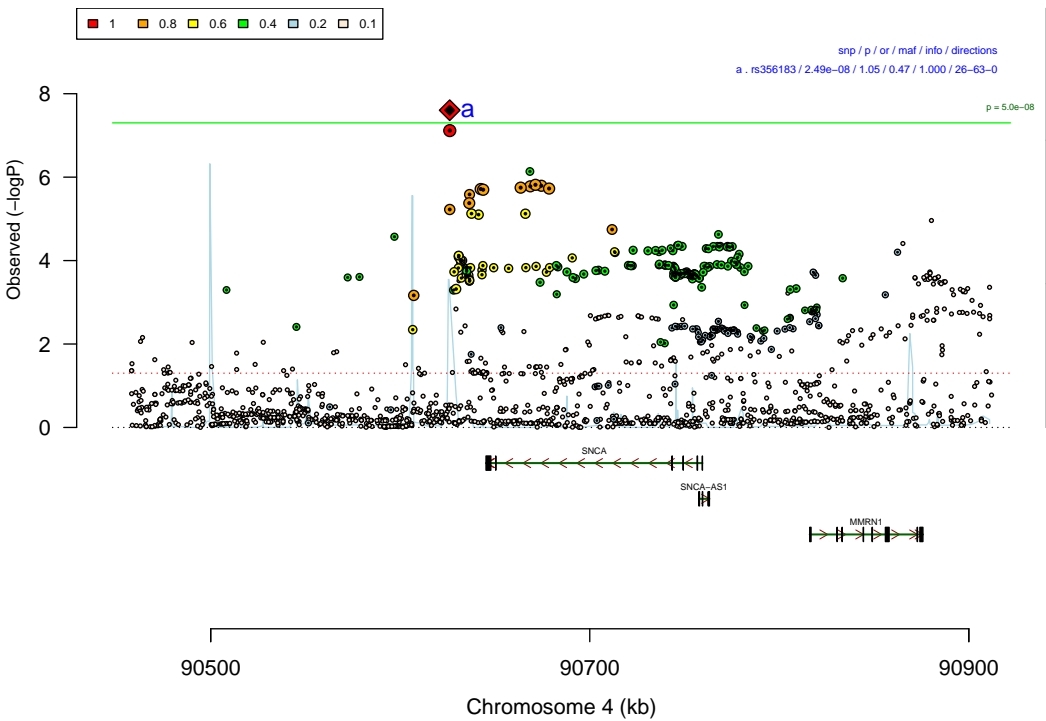

SCZ\_cond-rs356183-chr4

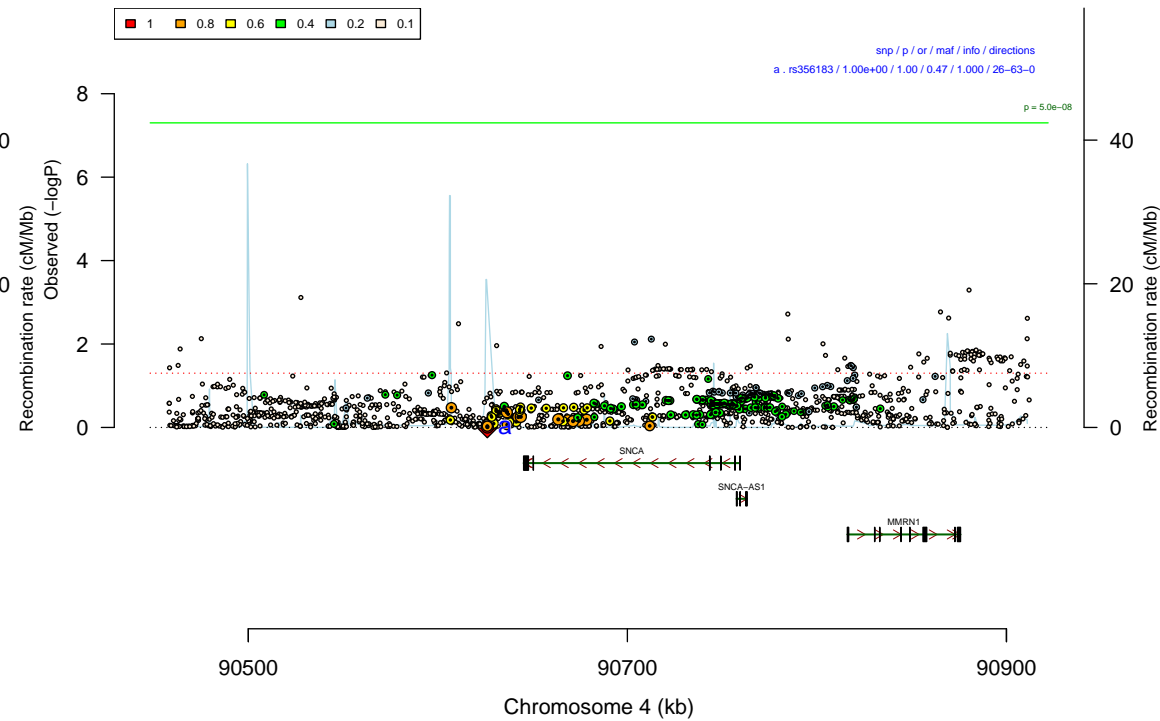

SCZ\_uncond-rs2206956-chr6

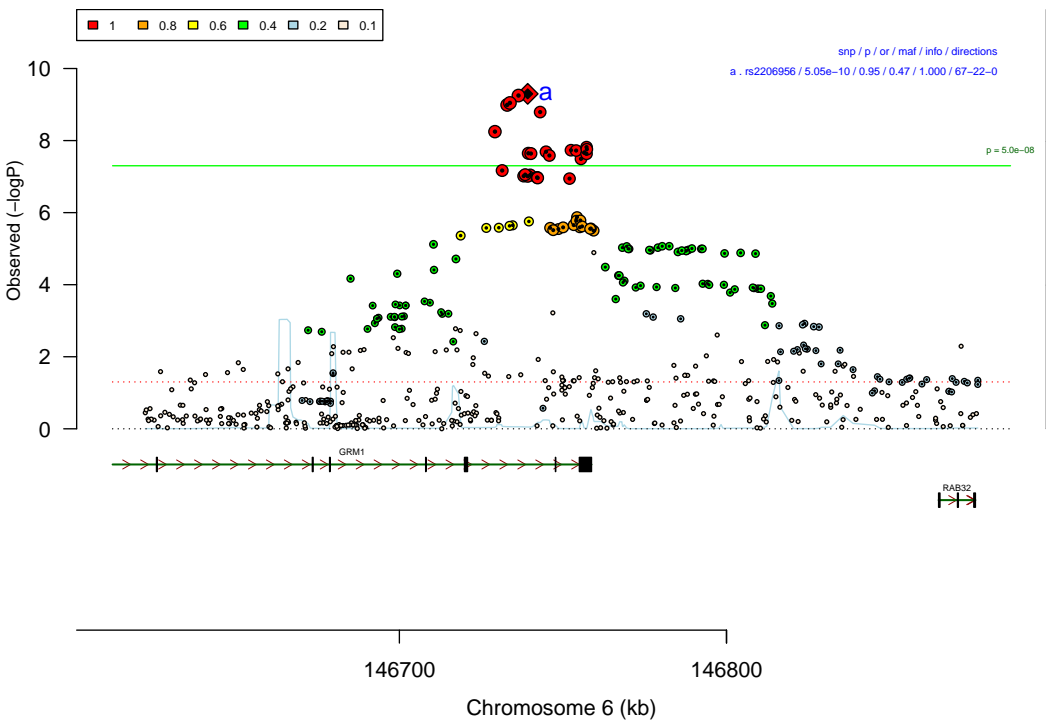

SCZ\_cond-rs2206956-chr6

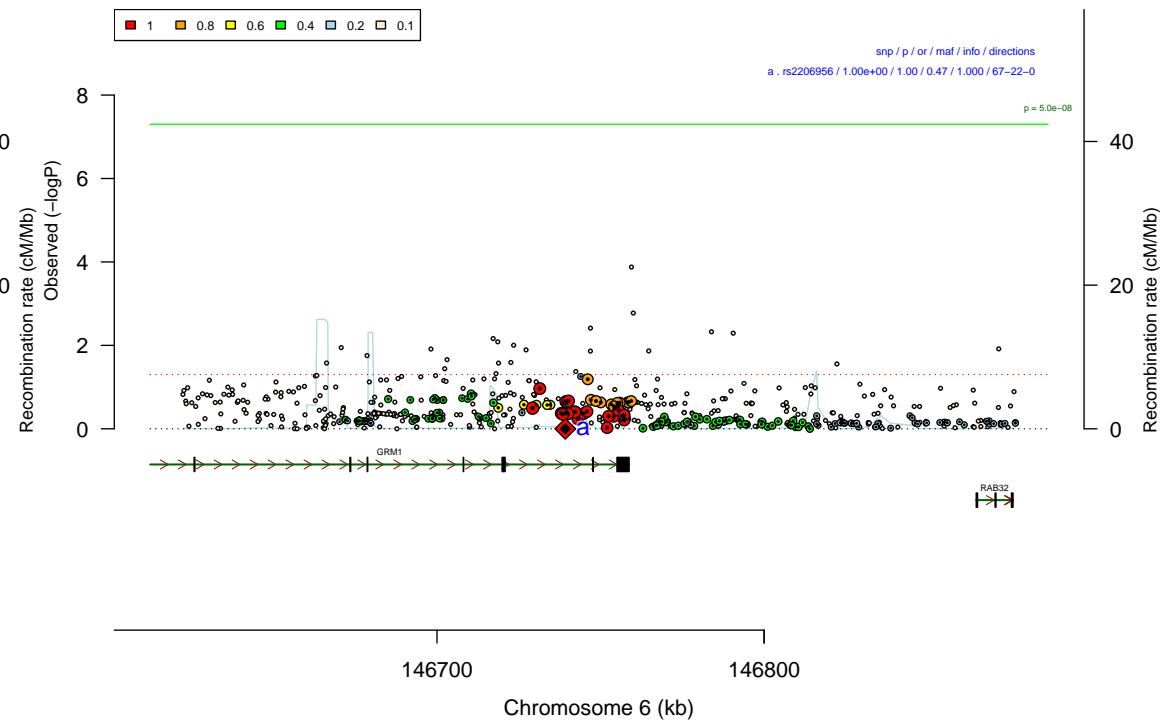

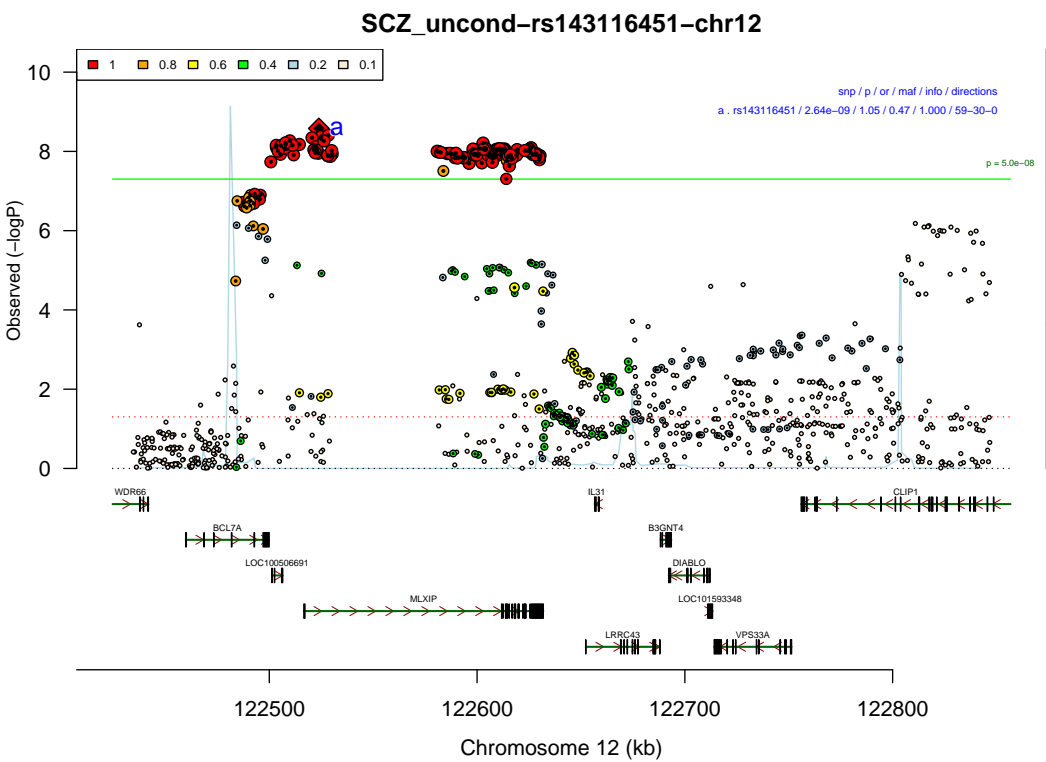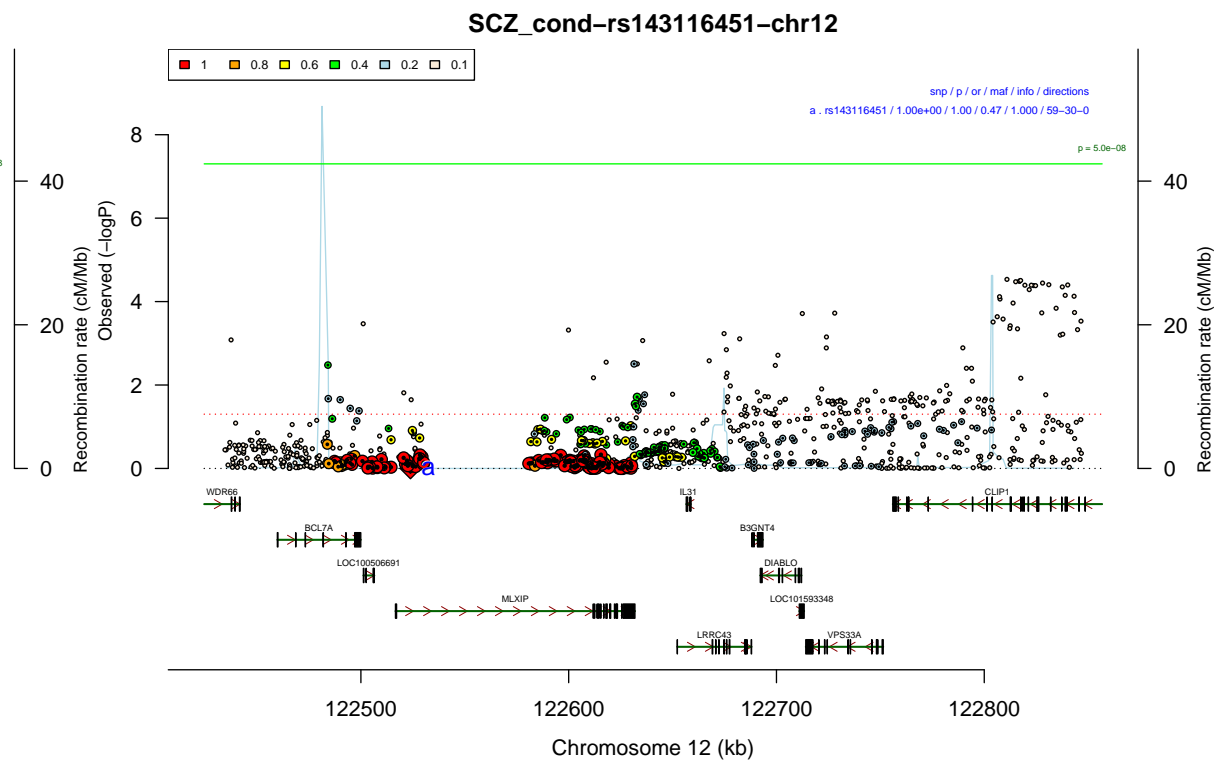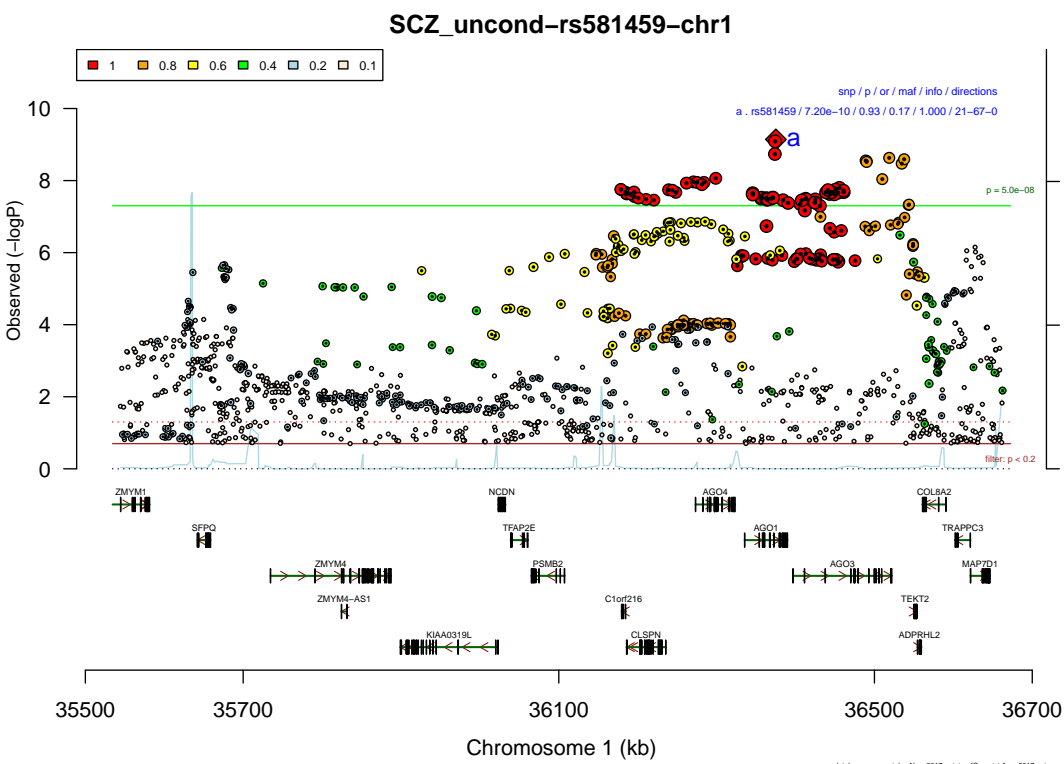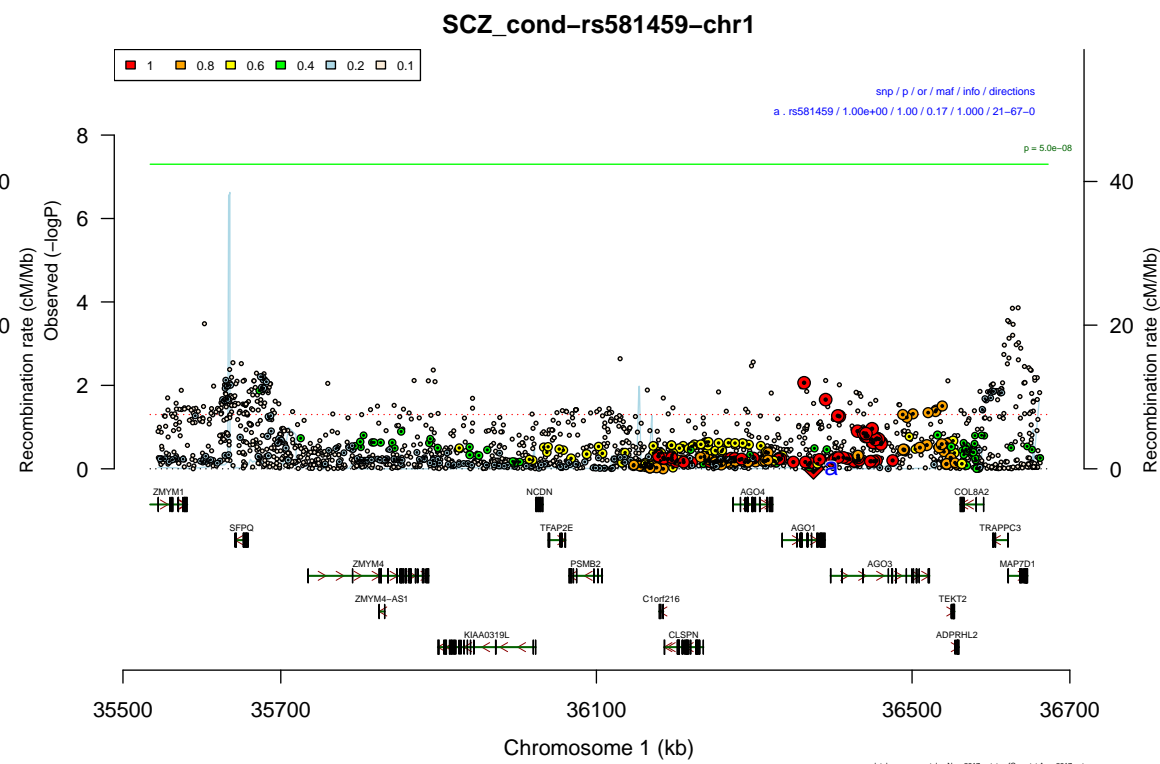

SCZ\_uncond-rs58950470-chr11

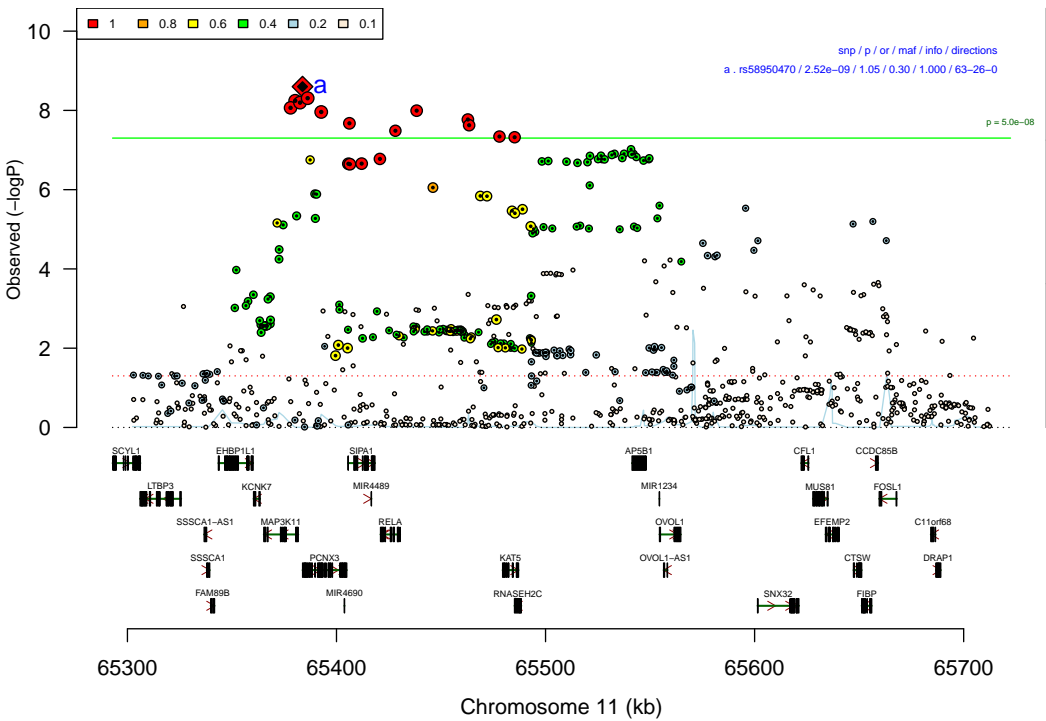

SCZ\_cond-rs58950470-chr11

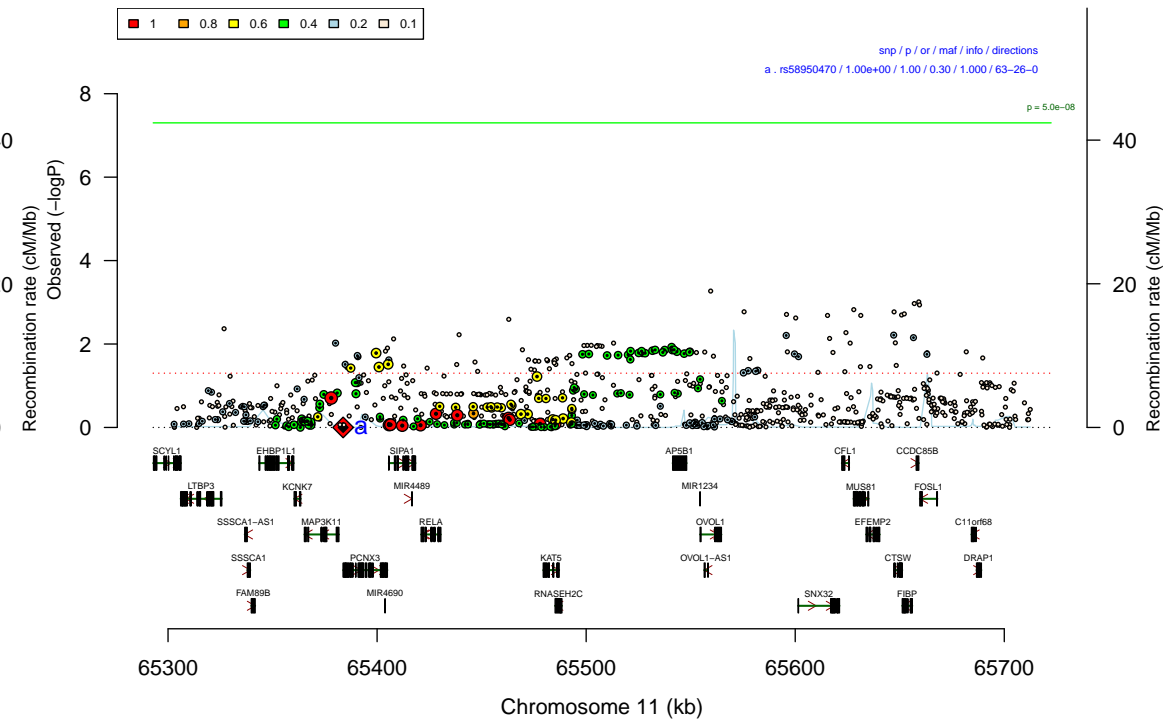

SCZ\_uncond-rs9975024-chr21

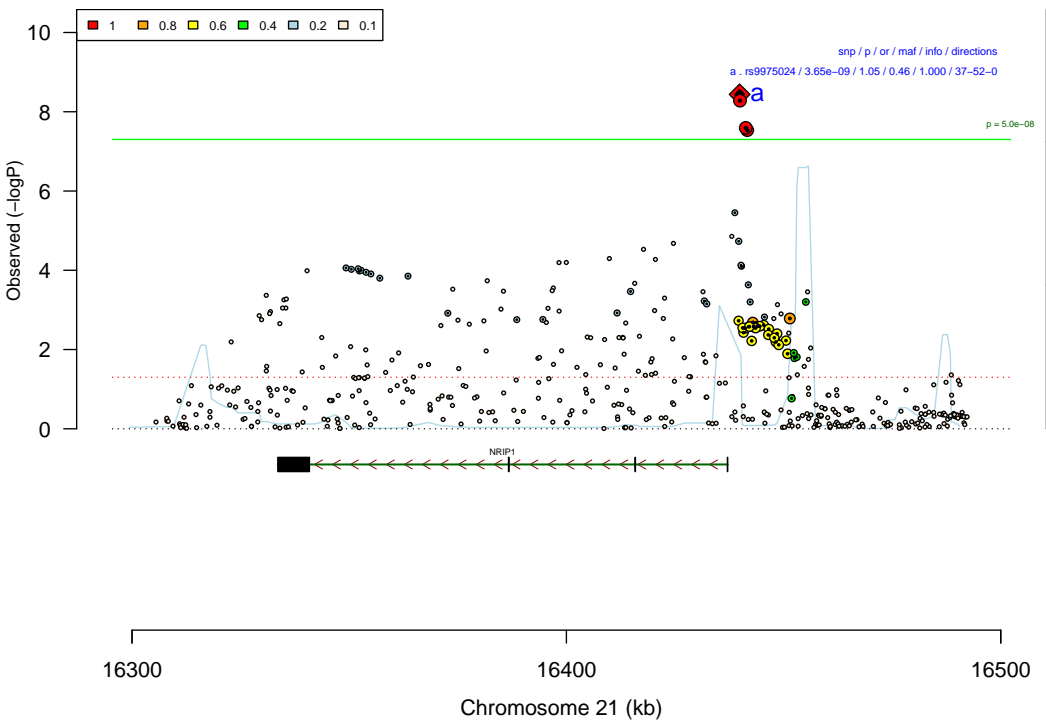

SCZ\_cond-rs9975024-chr21

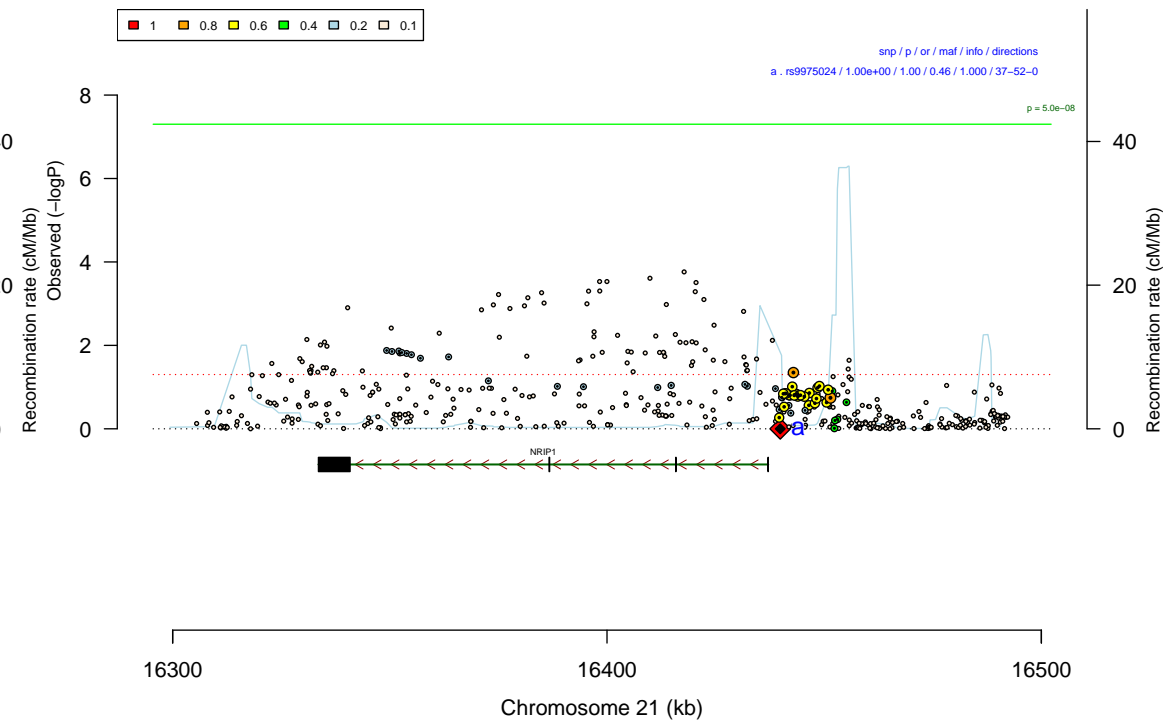

SCZ\_uncond-rs9813516-chr3

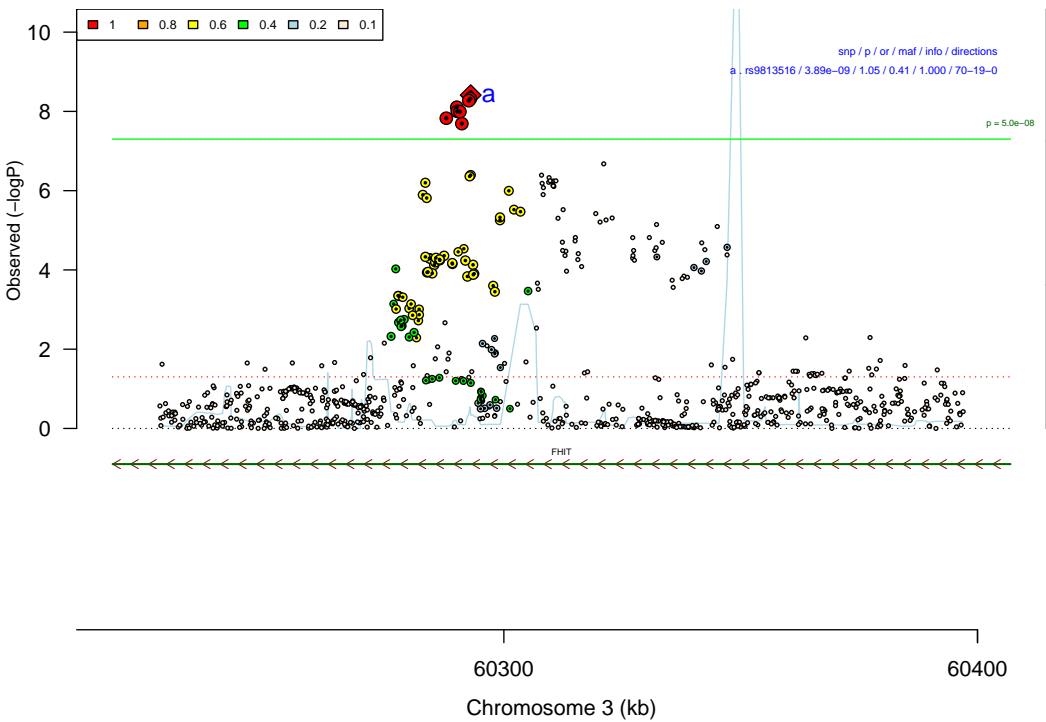

SCZ\_cond-rs9813516-chr3

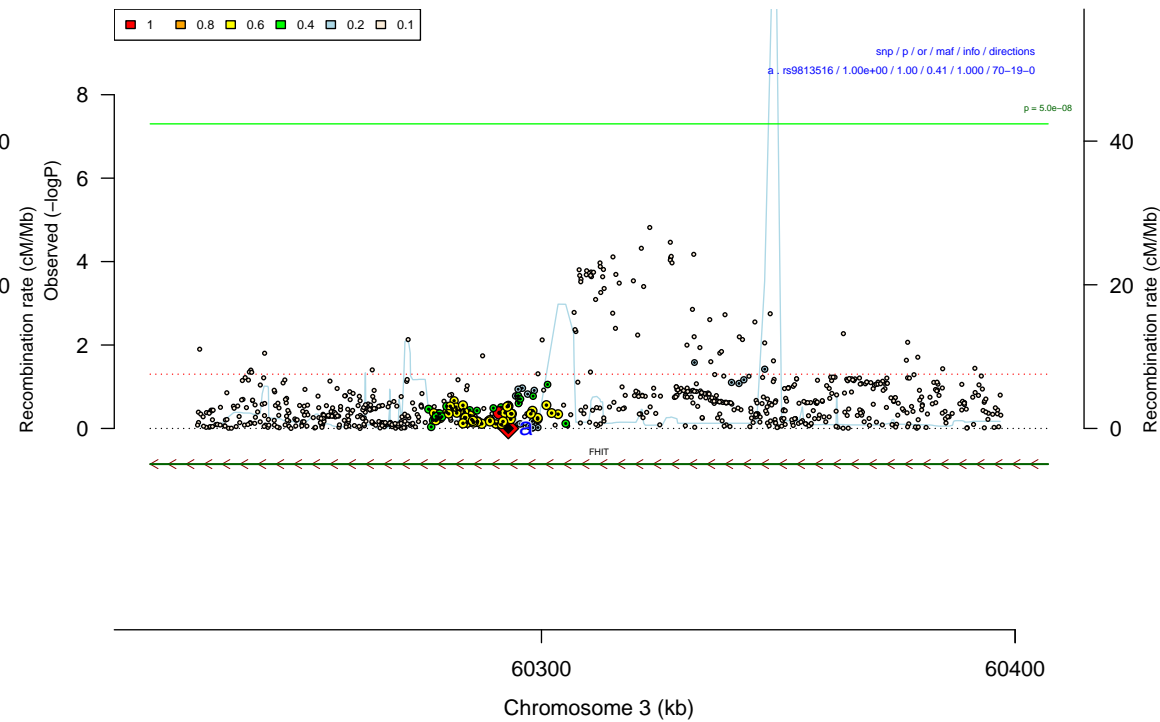

SCZ\_uncond-rs7002992-chr8

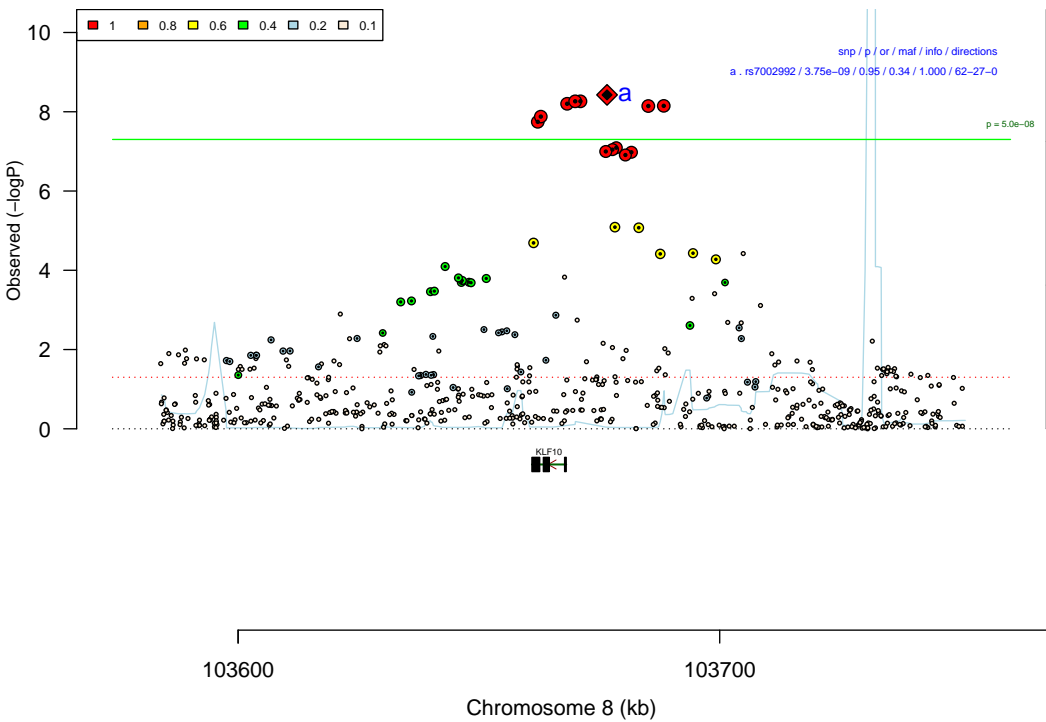

SCZ\_cond-rs7002992-chr8

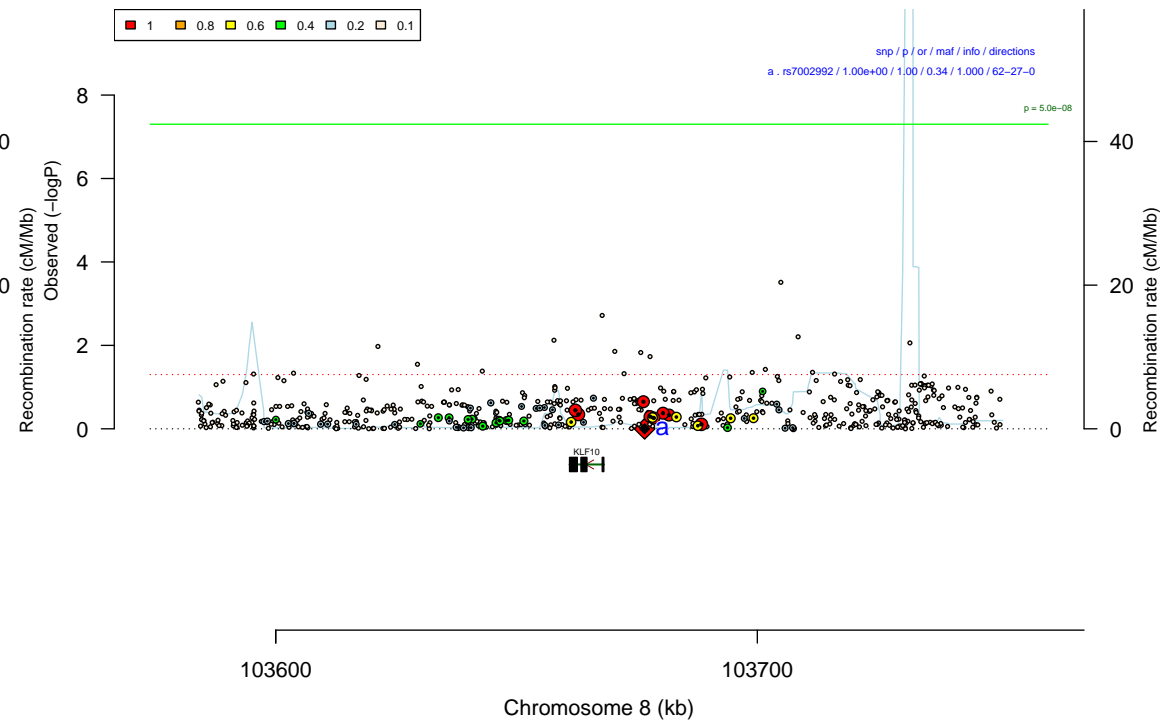

SCZ\_uncond-rs1540840-chr14

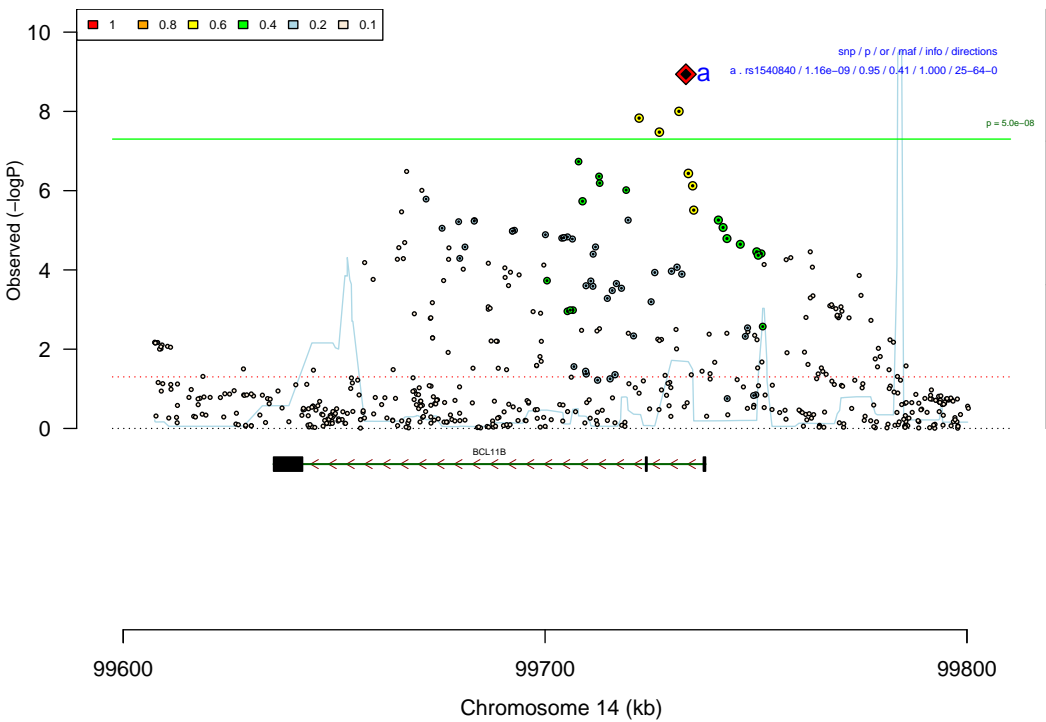

SCZ\_cond-rs1540840-chr14

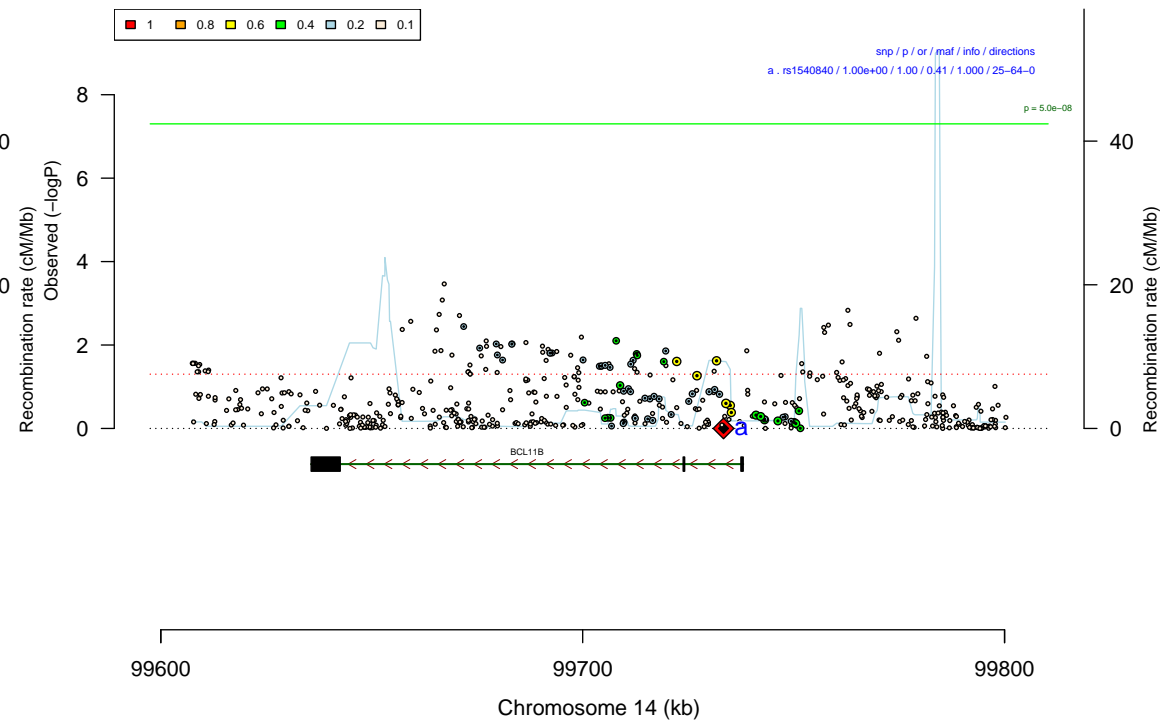

SCZ\_uncond-rs115325222-chr5

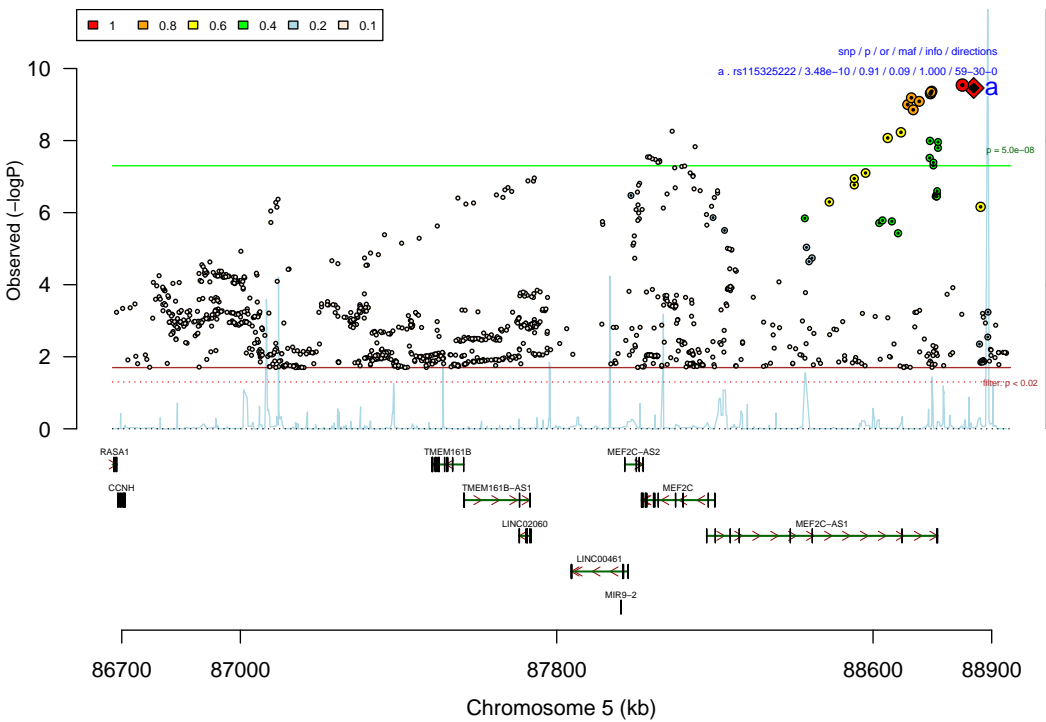

SCZ\_cond-rs115325222-chr5

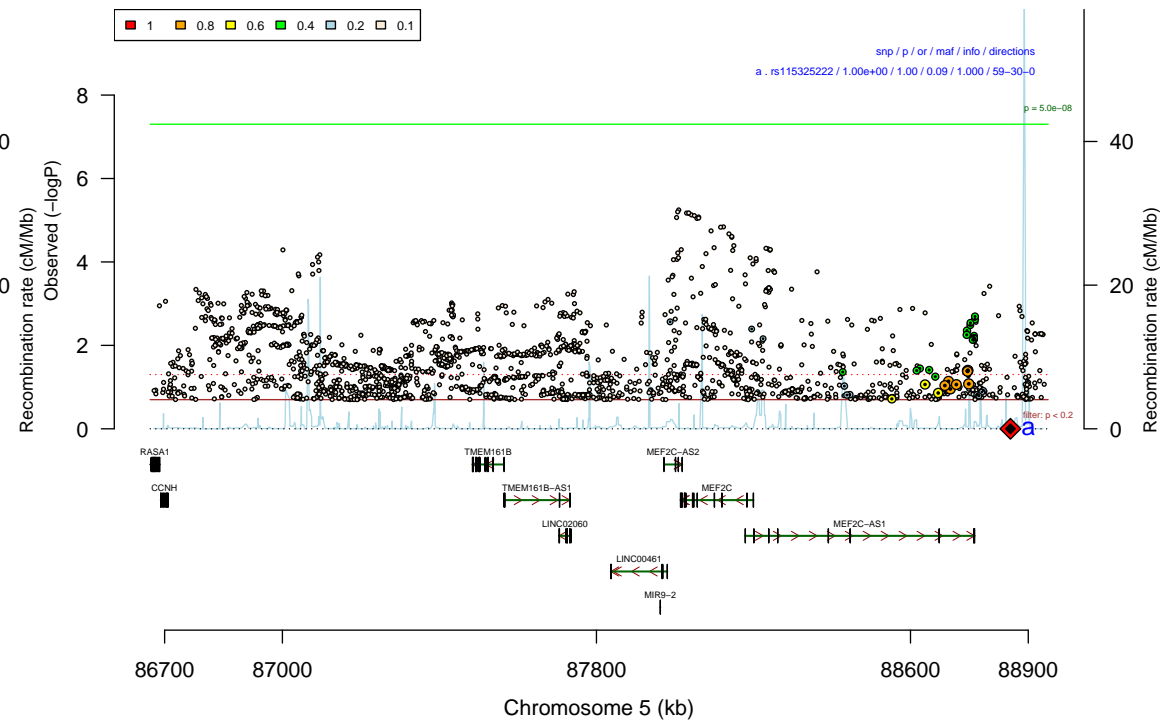



SCZ\_uncond-rs12138231-chr1

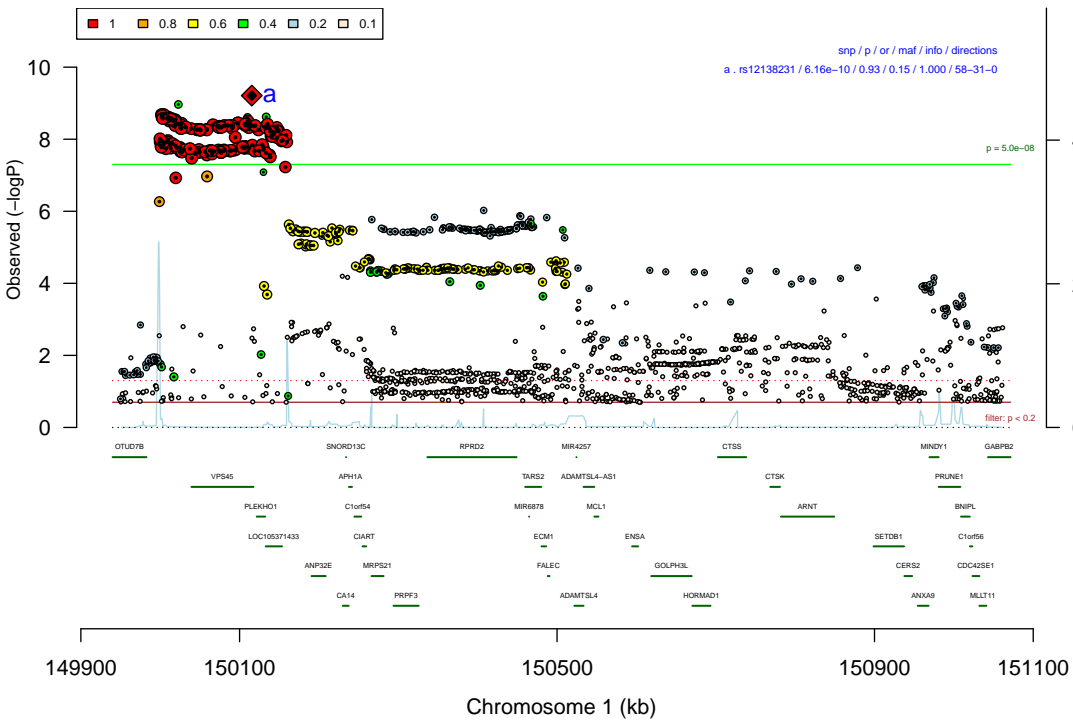

SCZ\_cond-rs12138231-chr1

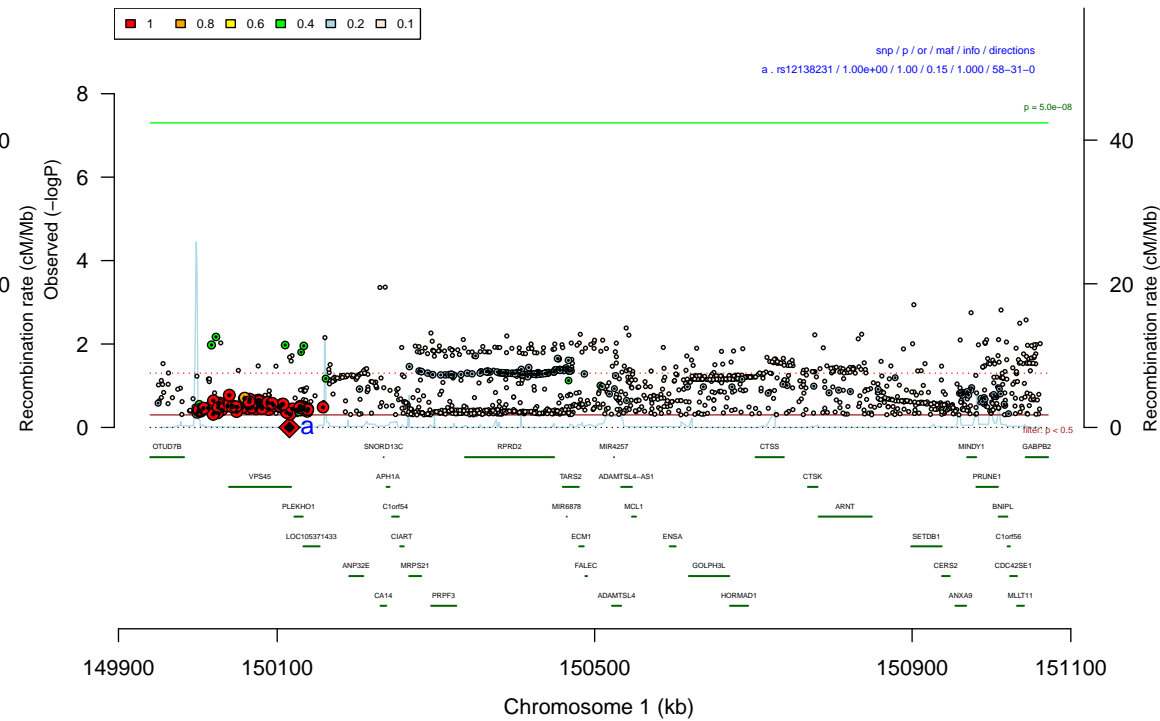

SCZ\_uncond-rs59519965-chr1

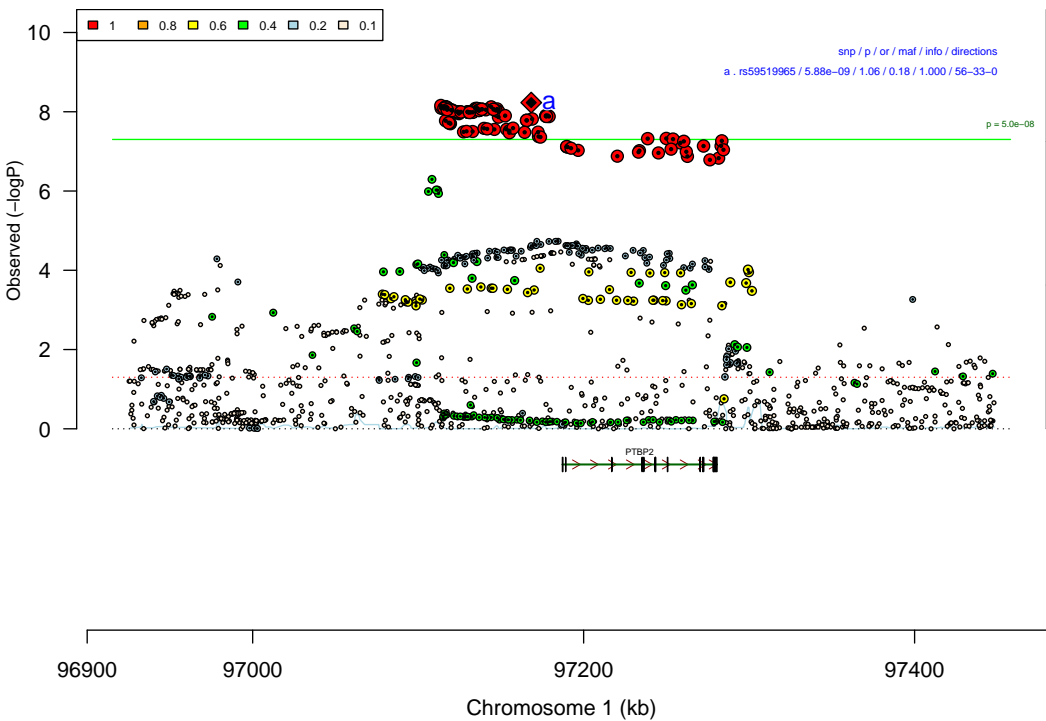

SCZ\_cond-rs59519965-chr1

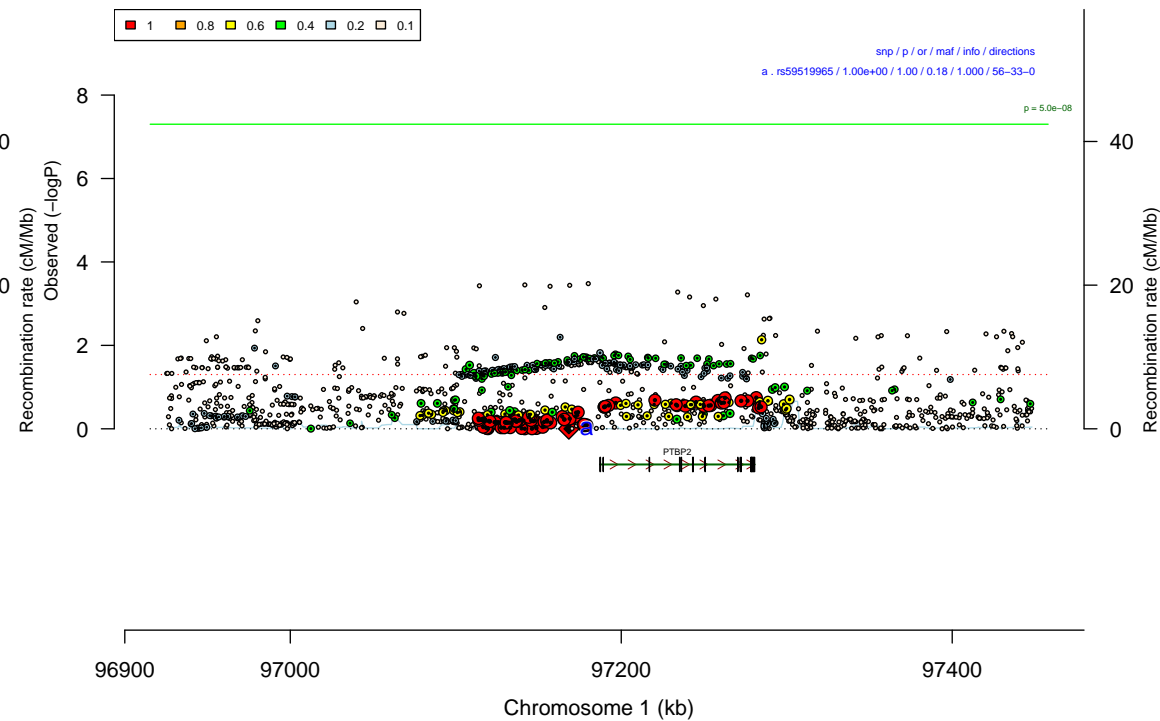



SCZ\_uncond-rs4632195-chr18

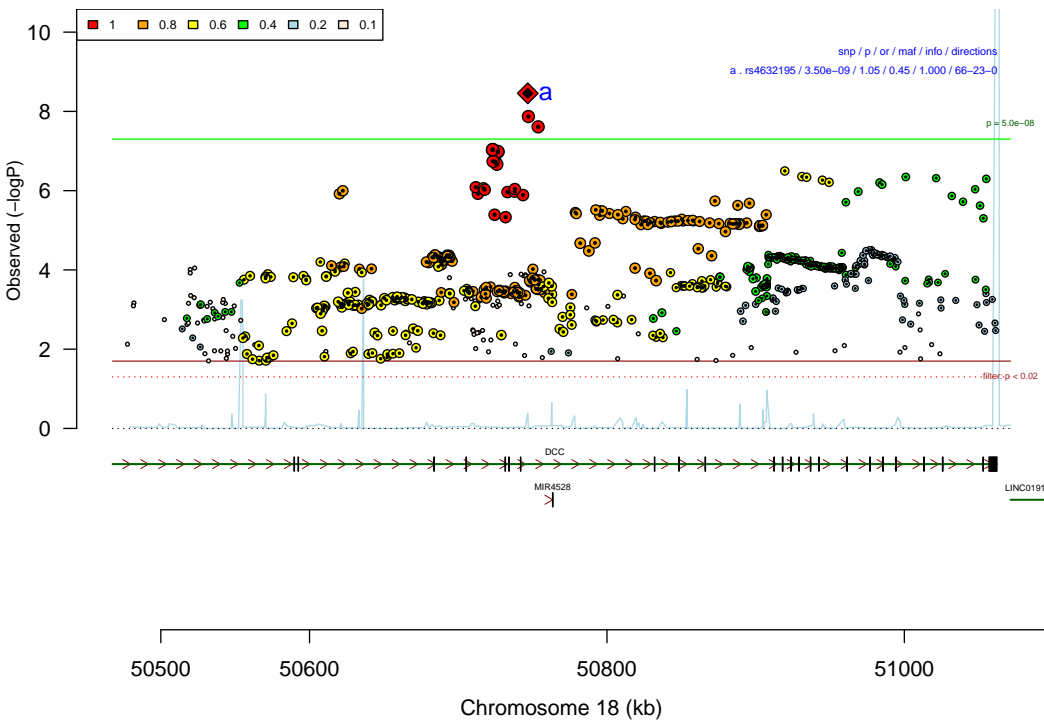

SCZ\_cond-rs4632195-chr18

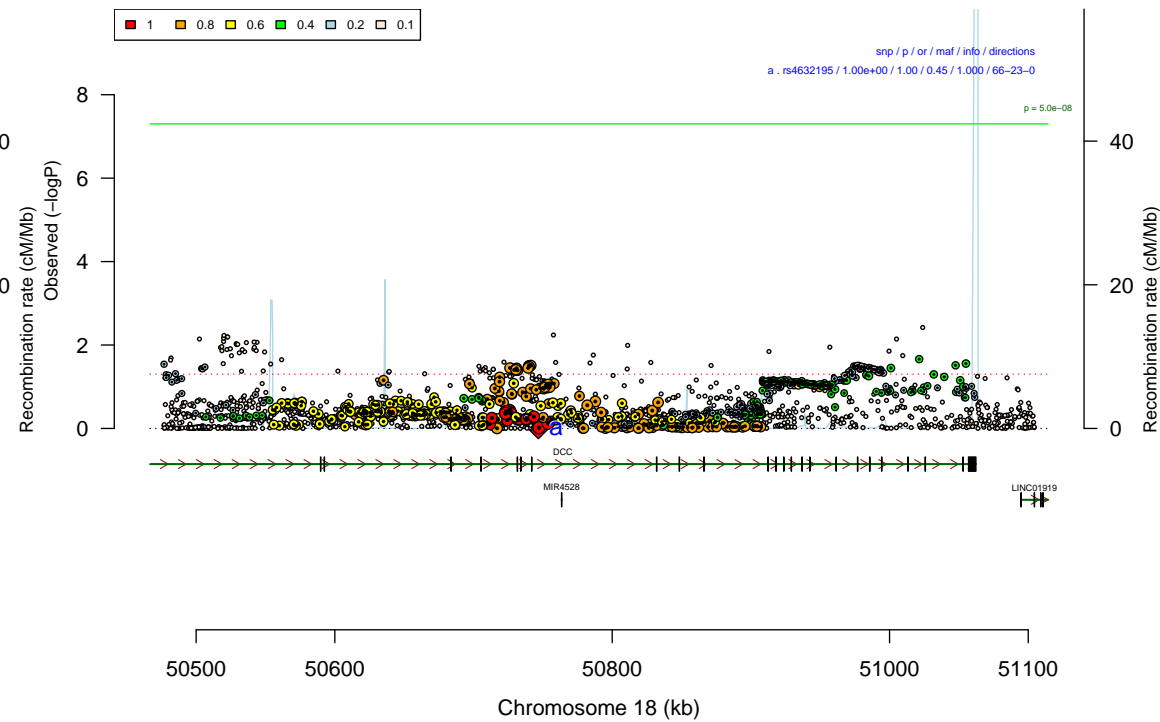

SCZ\_uncond-rs2381411-chr9

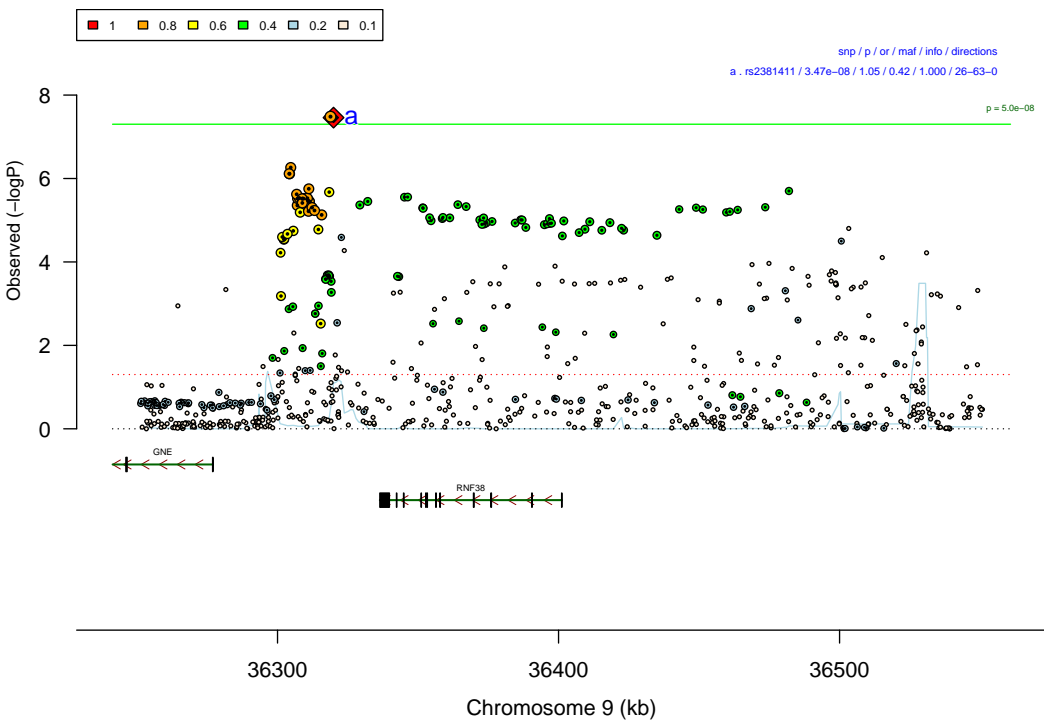

SCZ\_cond-rs2381411-chr9

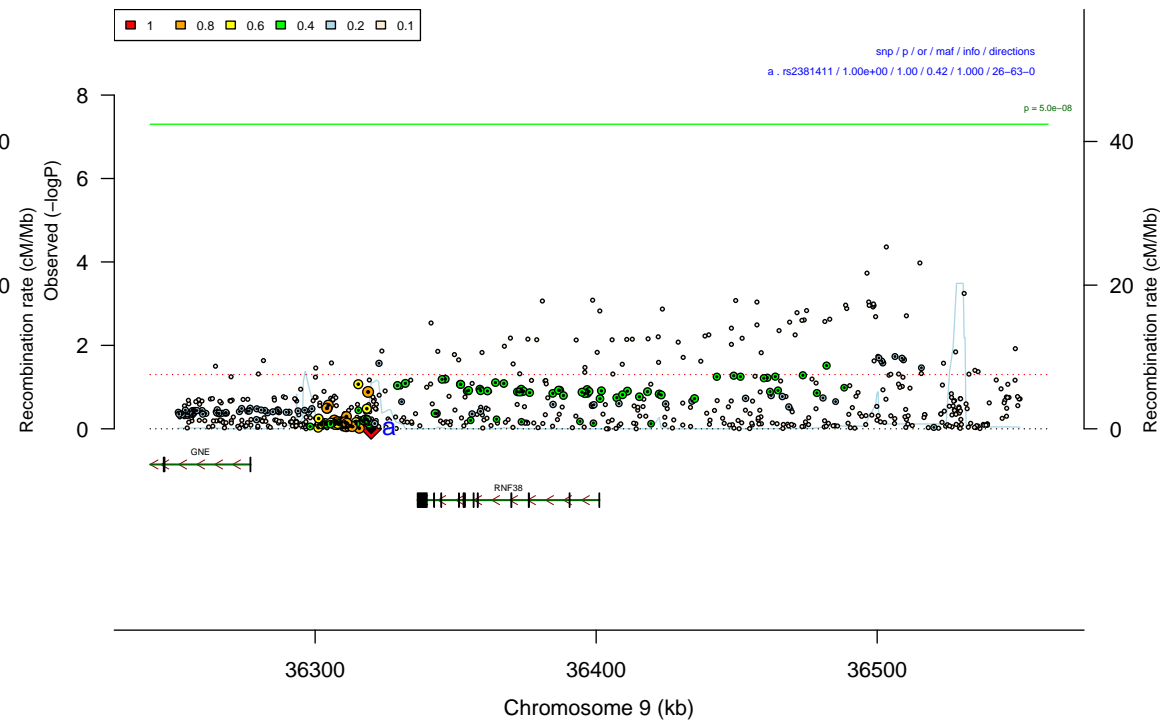

SCZ\_uncond-rs11136325-chr8

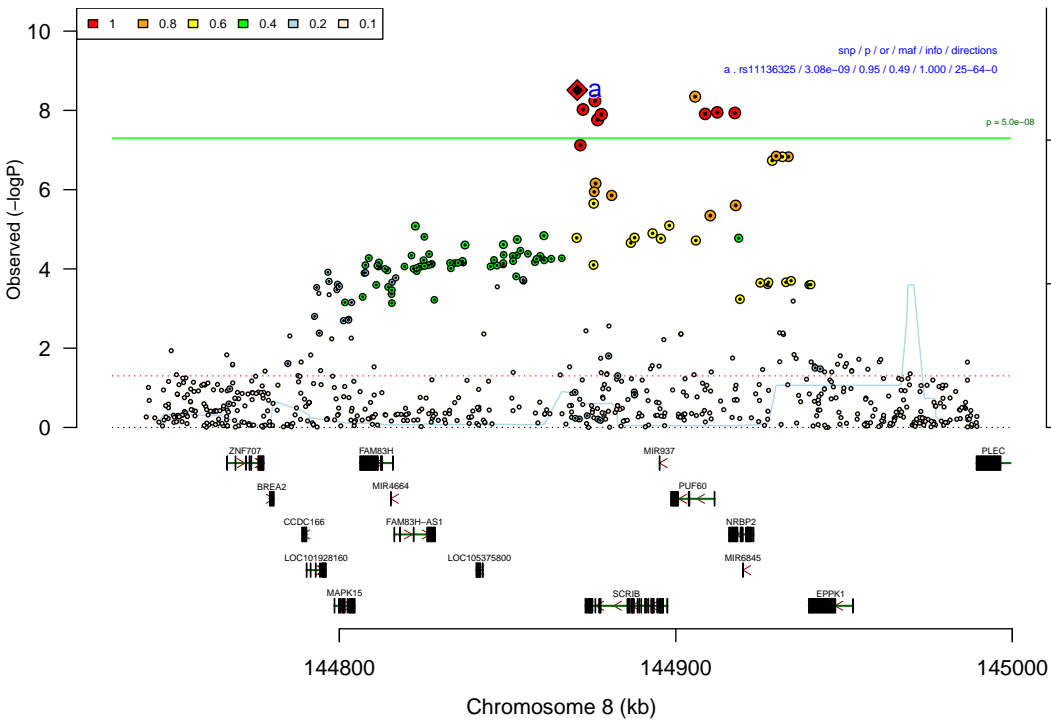

SCZ\_cond-rs11136325-chr8

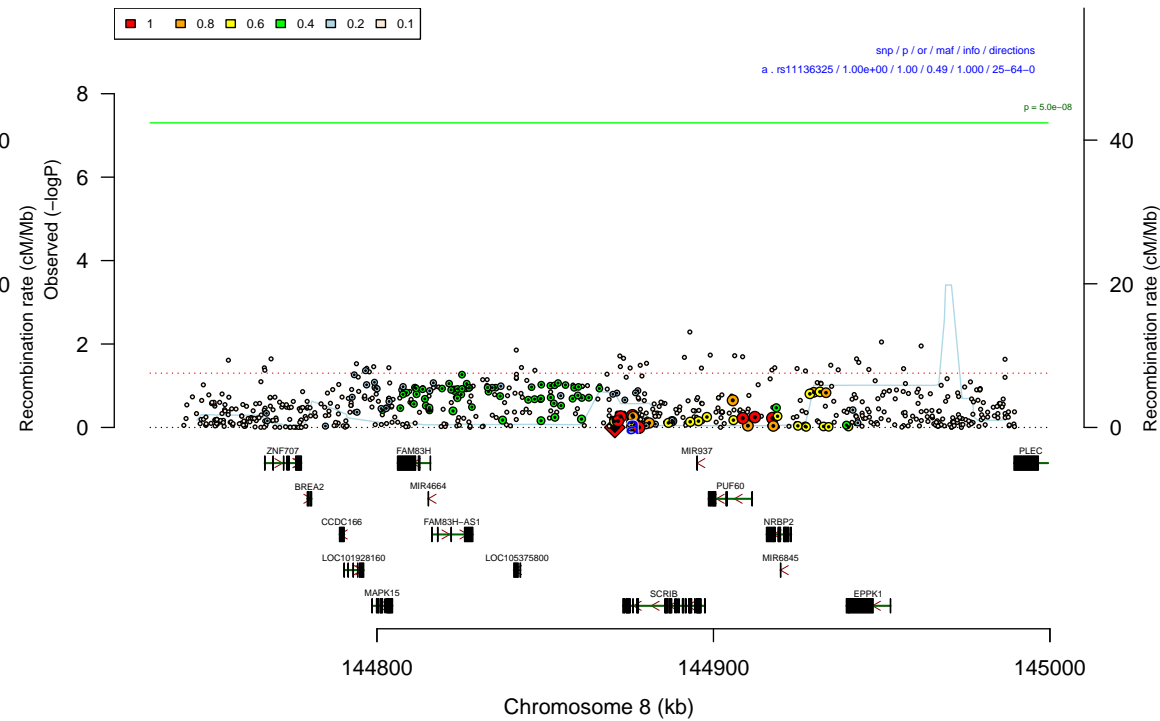

SCZ\_uncond-rs10148671-chr14

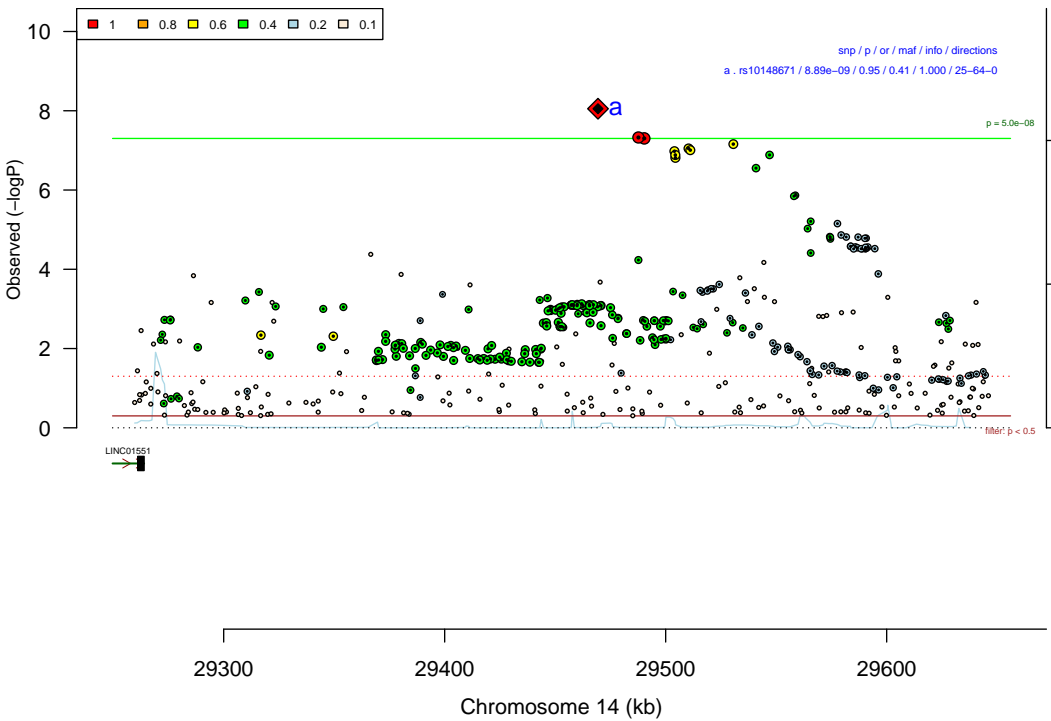

SCZ\_cond-rs10148671-chr14

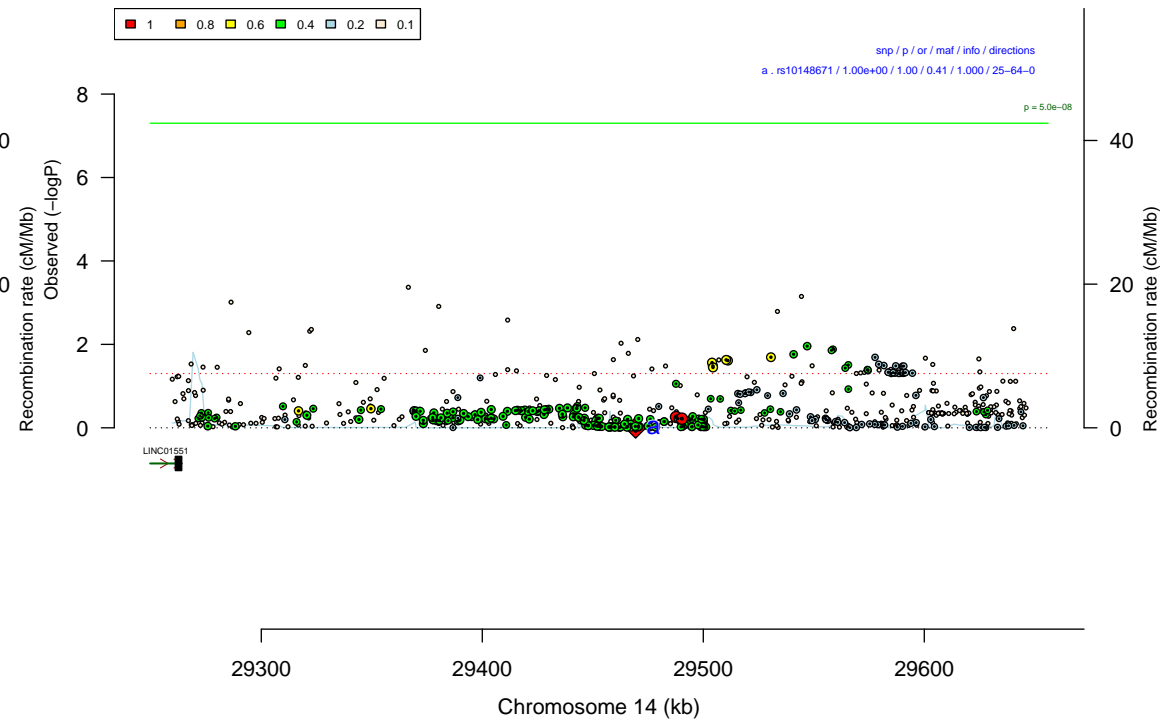

SCZ\_uncond-rs252812-chr5

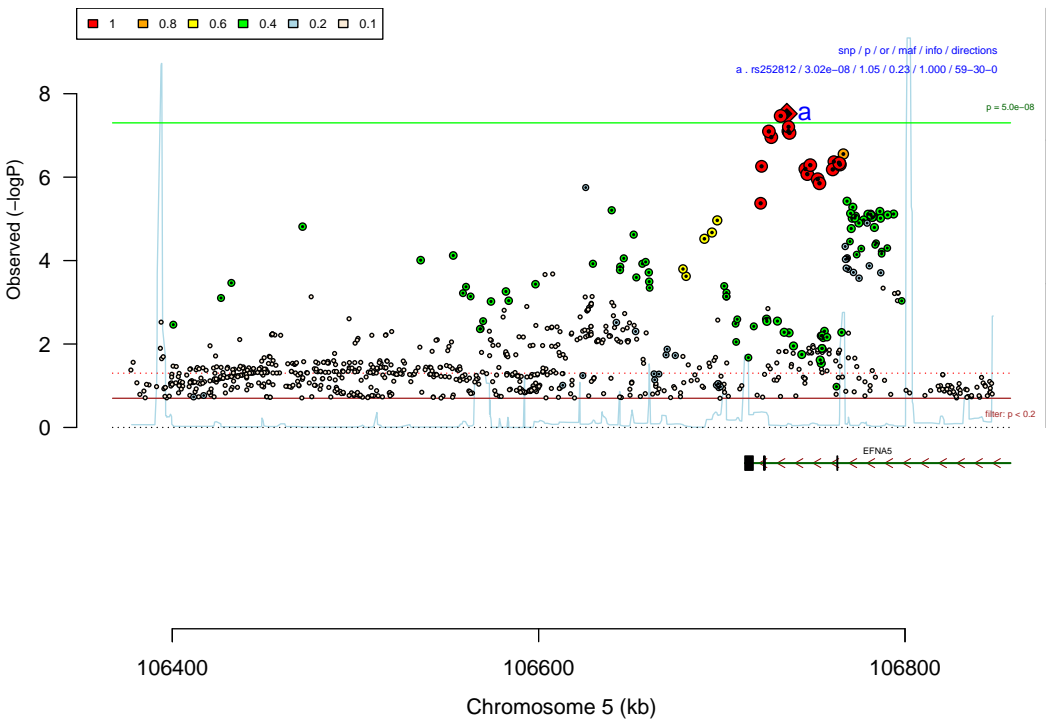

SCZ\_cond-rs252812-chr5

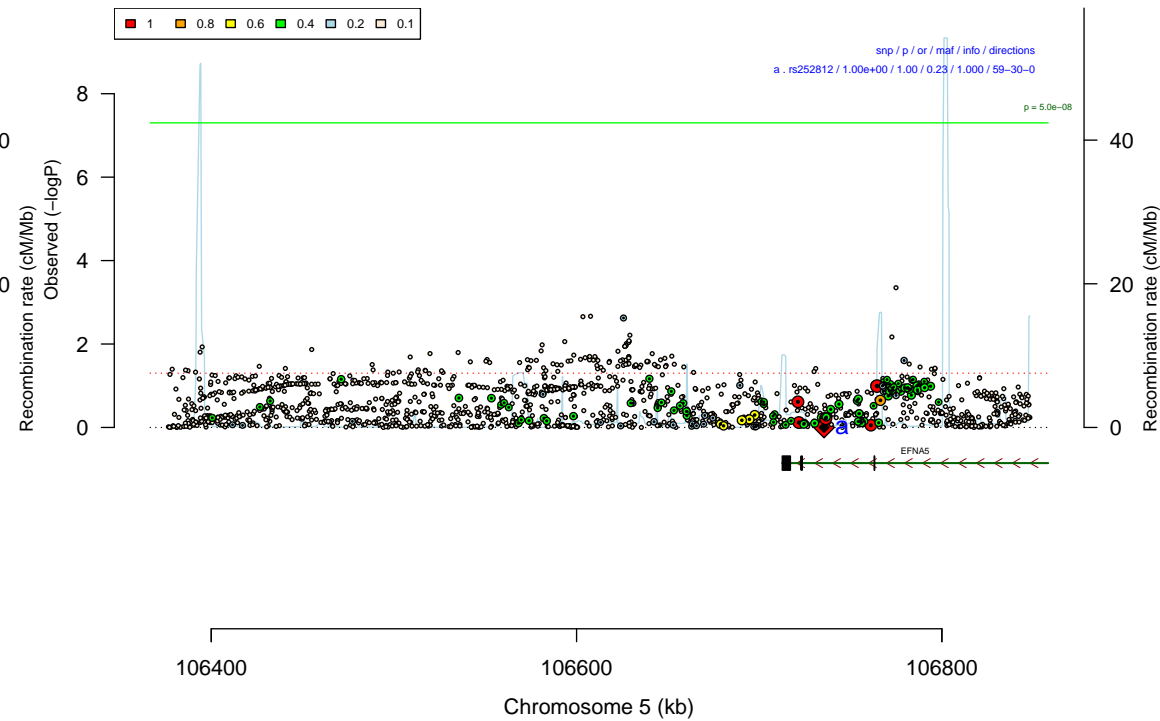

SCZ\_uncond-rs35734242-chr4

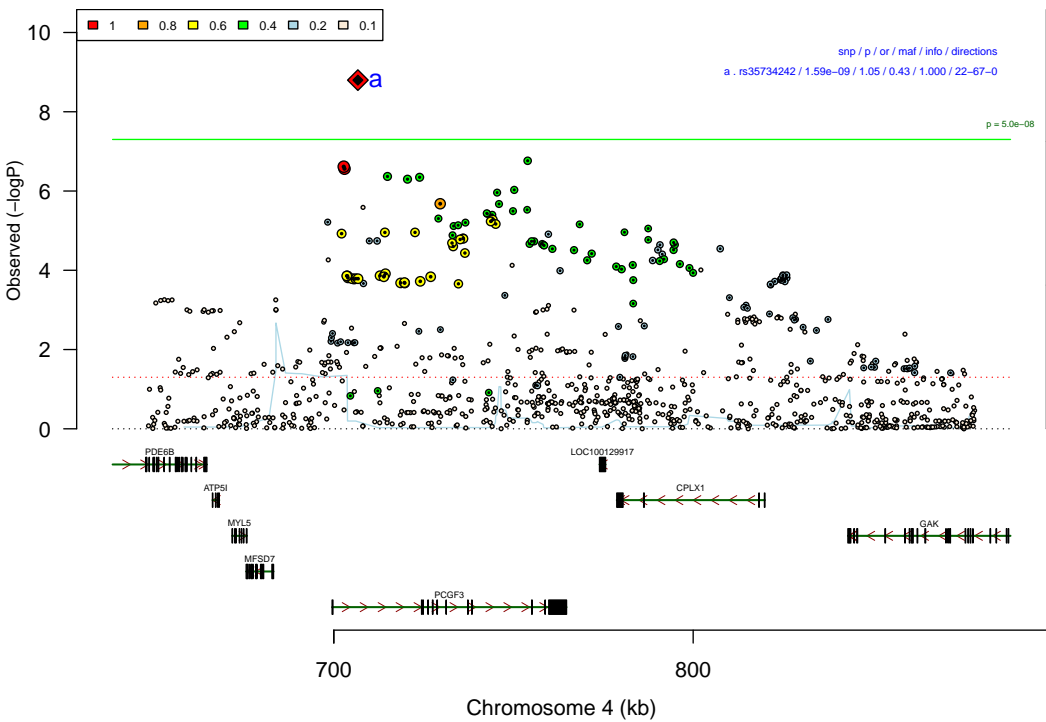

SCZ\_cond-rs35734242-chr4

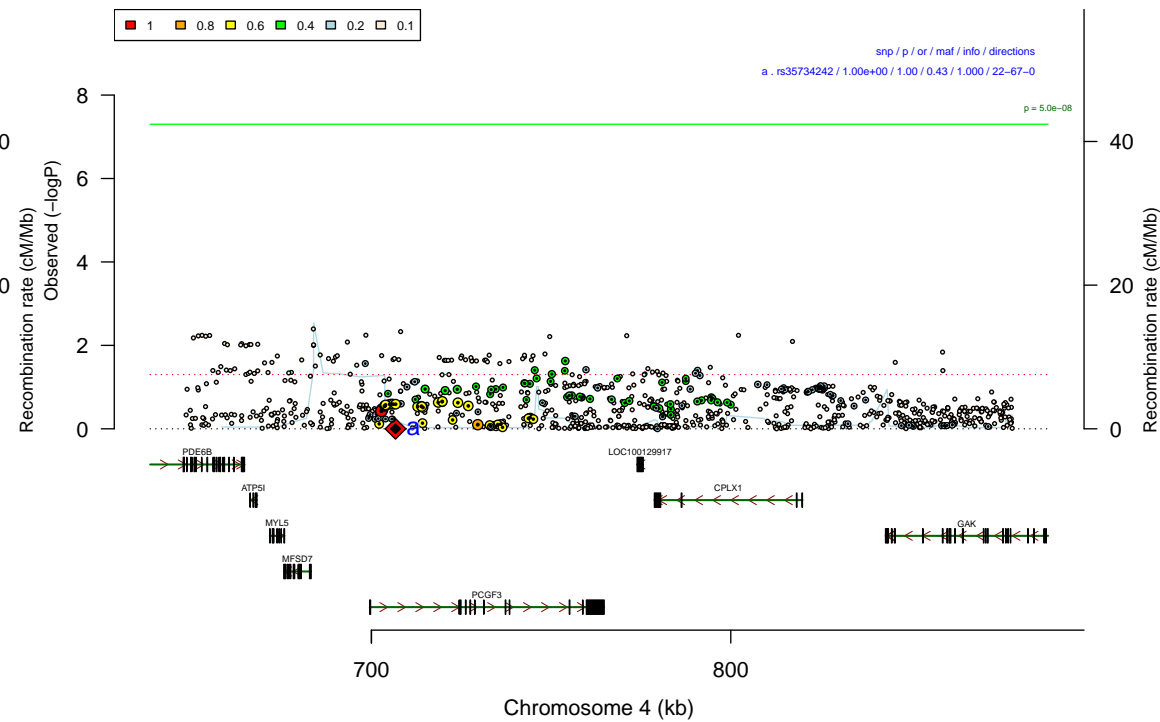

SCZ\_uncond-rs3810450-chr19

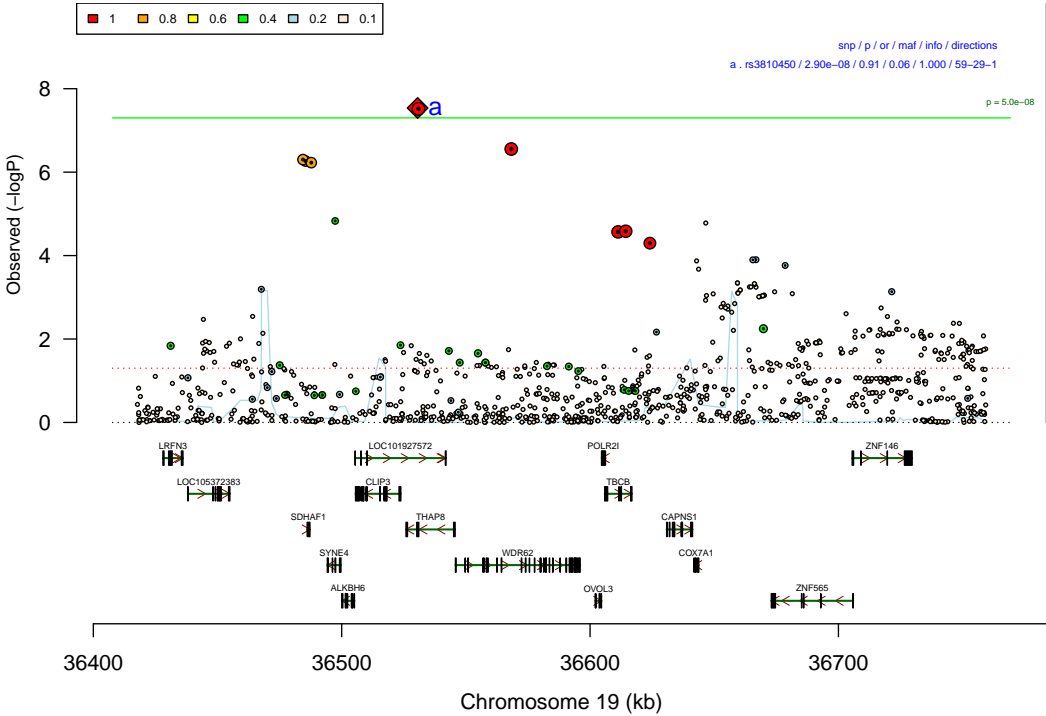

SCZ\_cond-rs3810450-chr19

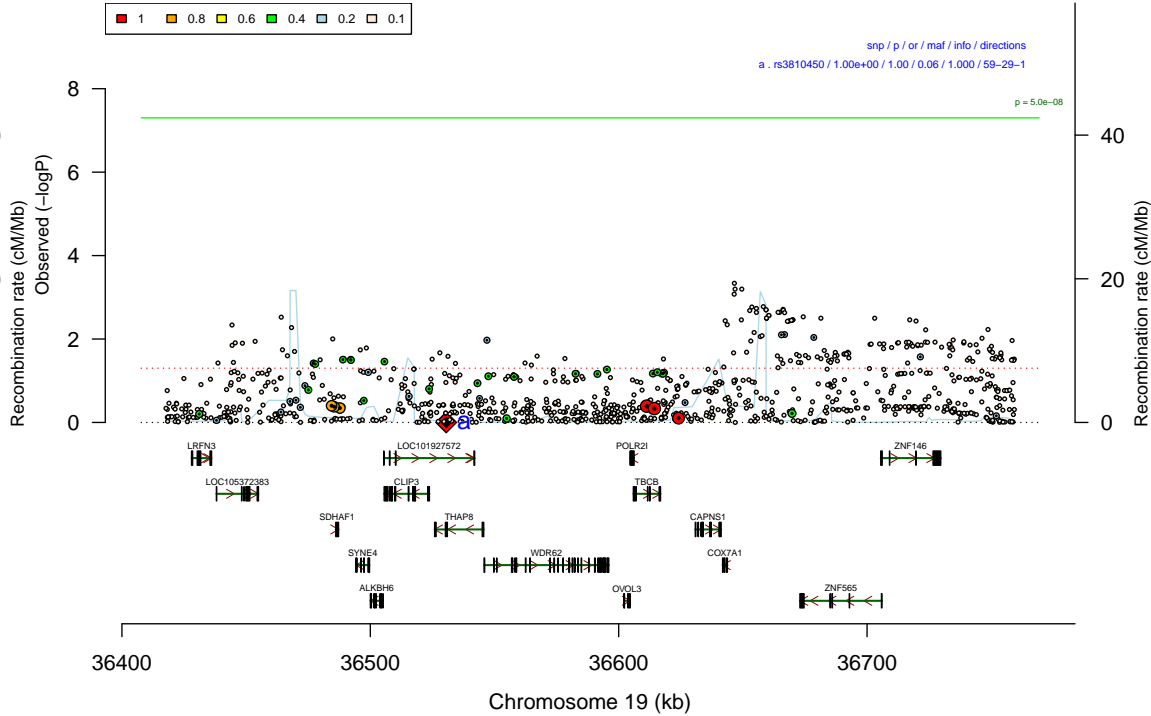

SCZ\_uncond-rs3764002-chr12

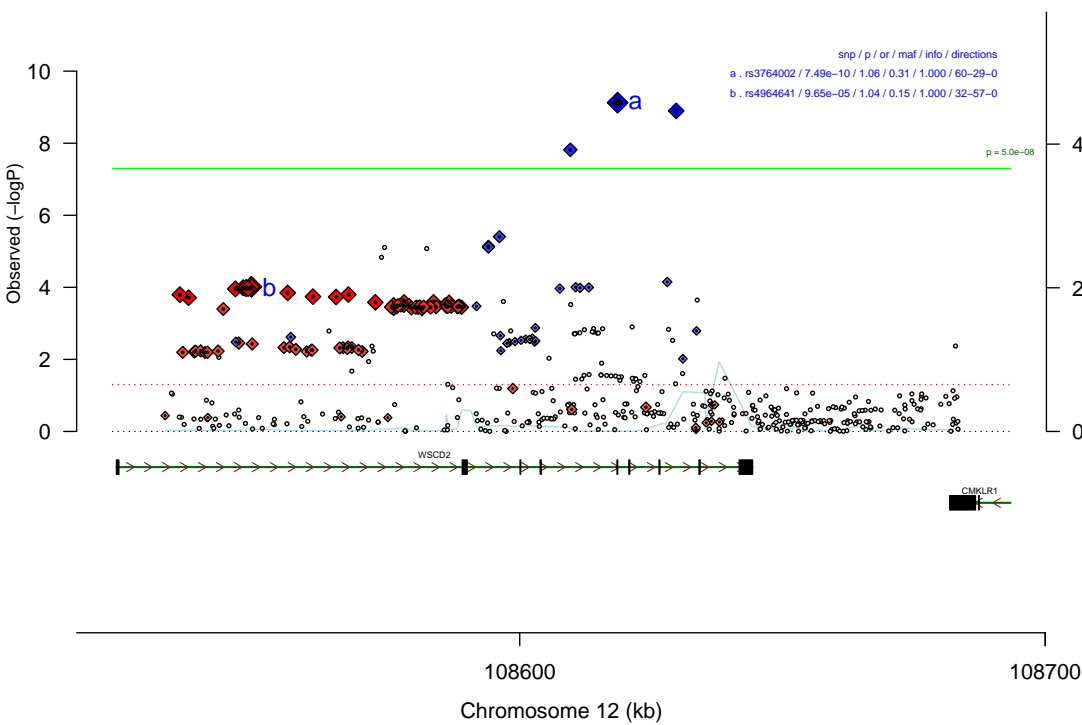

SCZ\_cond\_rs3764002-chr12

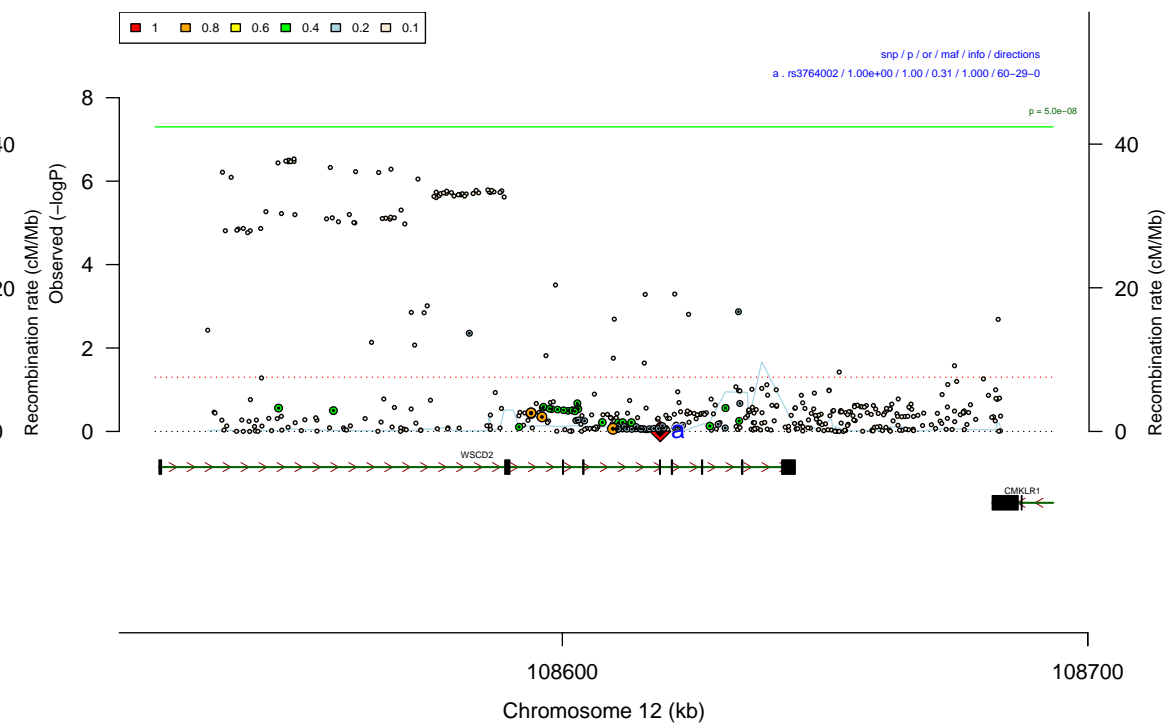

SCZ\_cond\_rs3764002-rs4964641-chr12

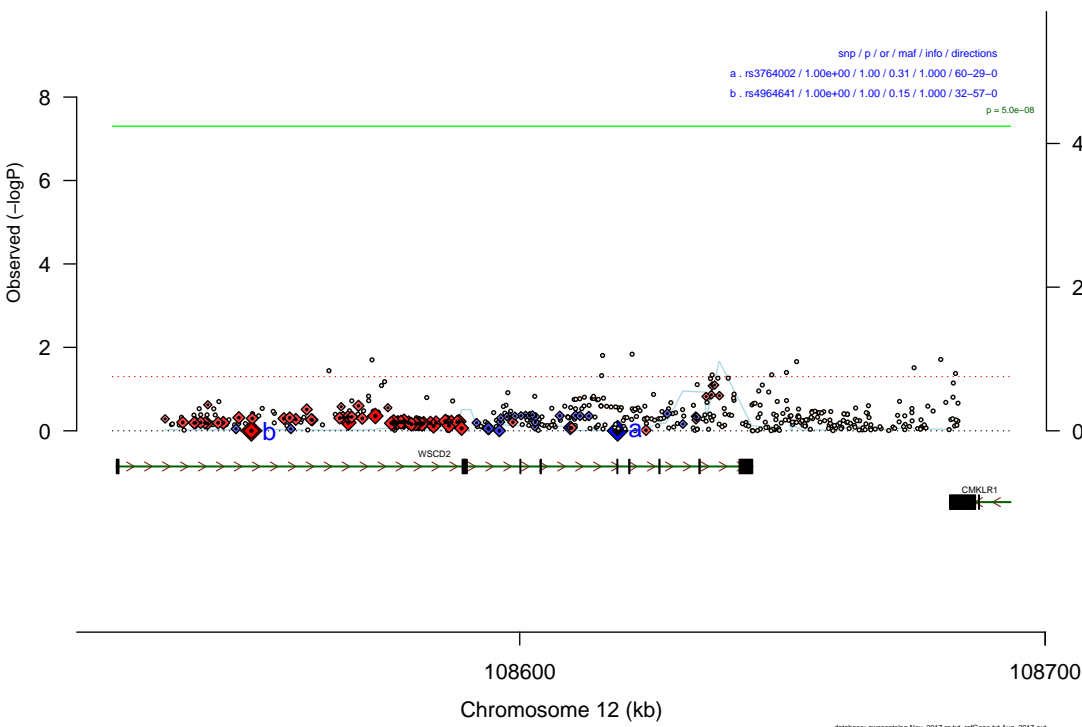

SCZ\_uncond-rs12712510-chr2

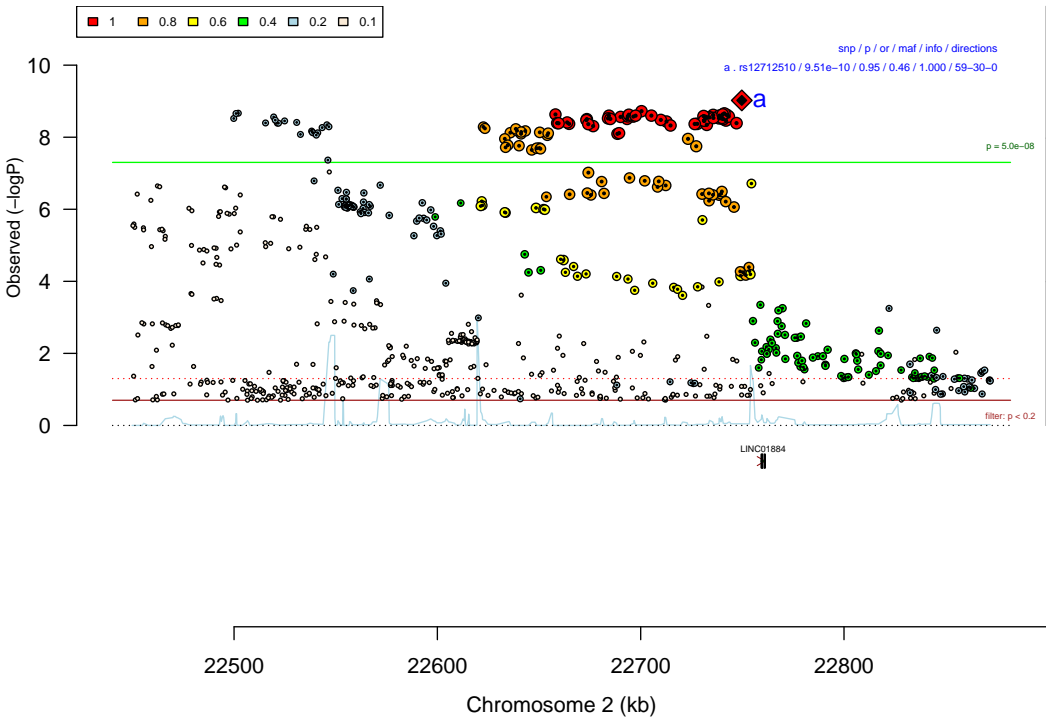

SCZ\_cond-rs12712510-chr2

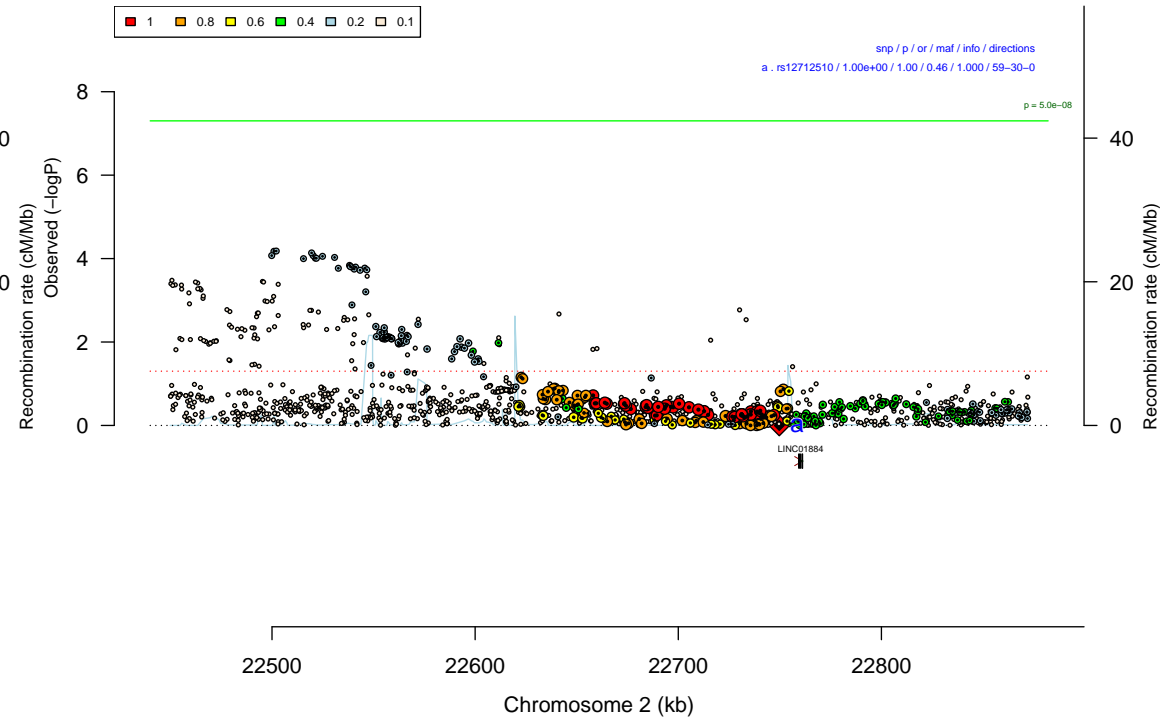

SCZ\_uncond-rs322128-chr19

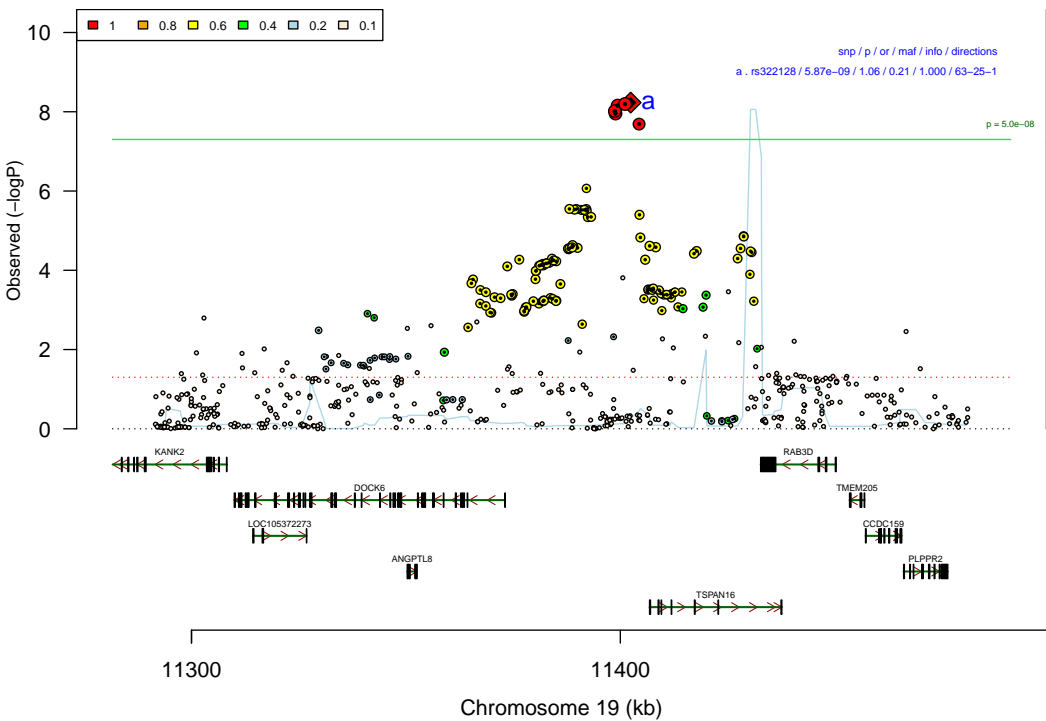

SCZ\_cond-rs322128-chr19

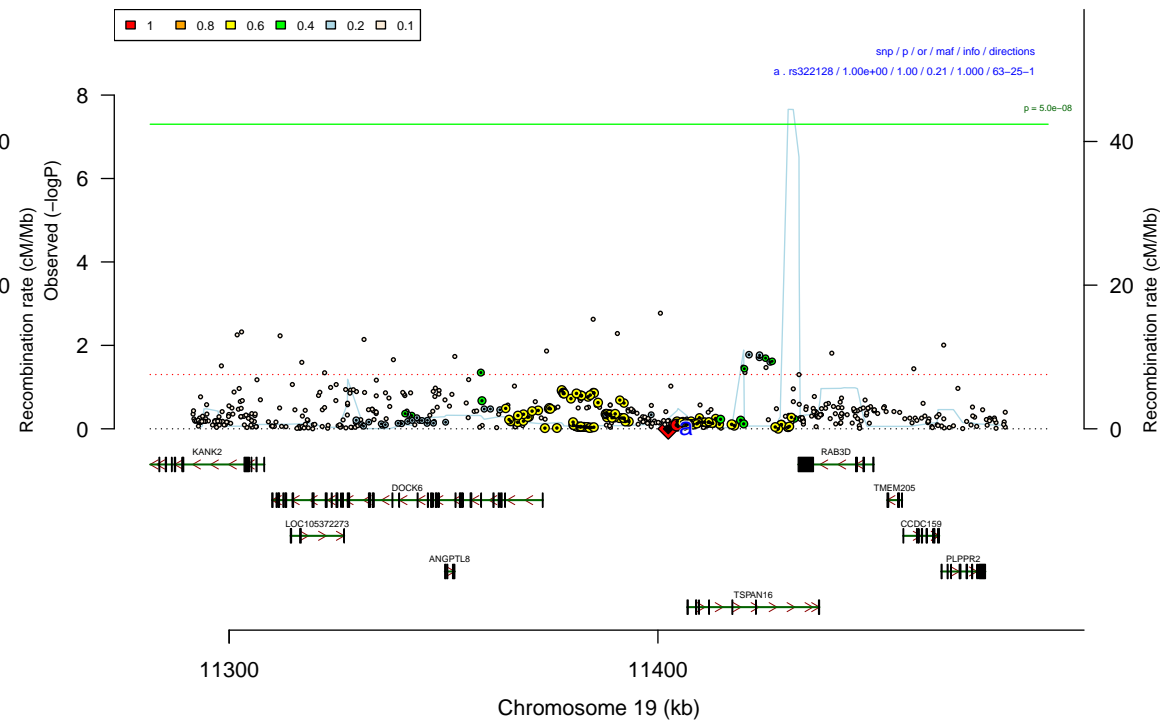

SCZ\_uncond-rs10243922-chr7

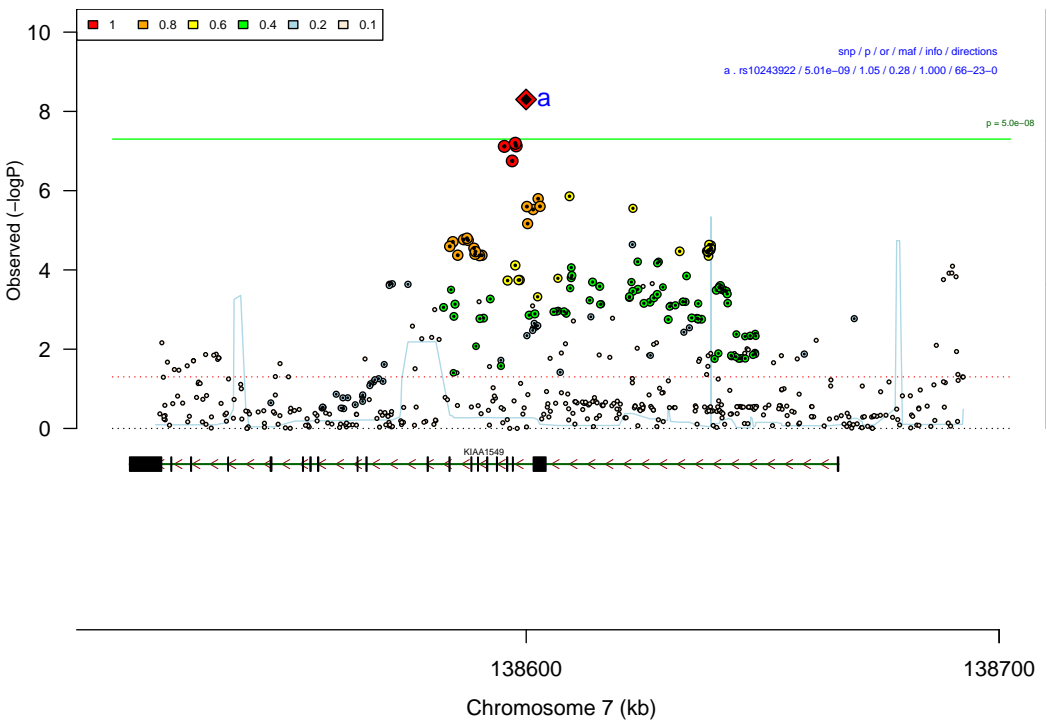

SCZ\_cond-rs10243922-chr7

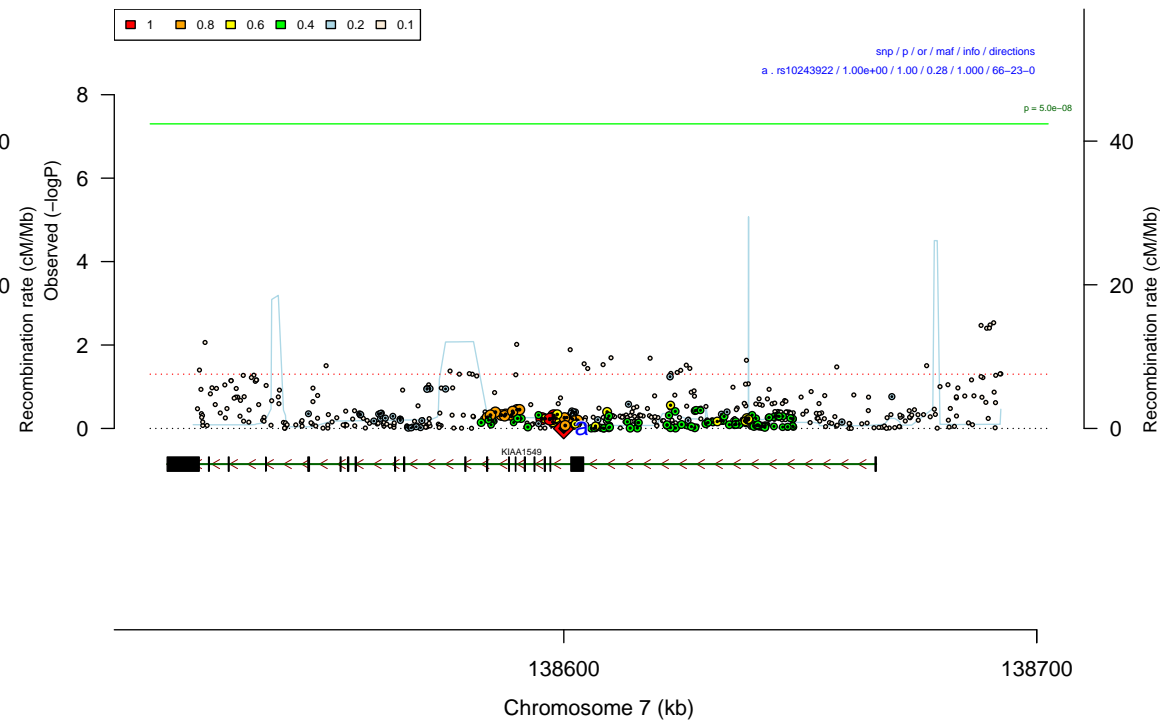

SCZ\_uncond-rs9569820-chr13

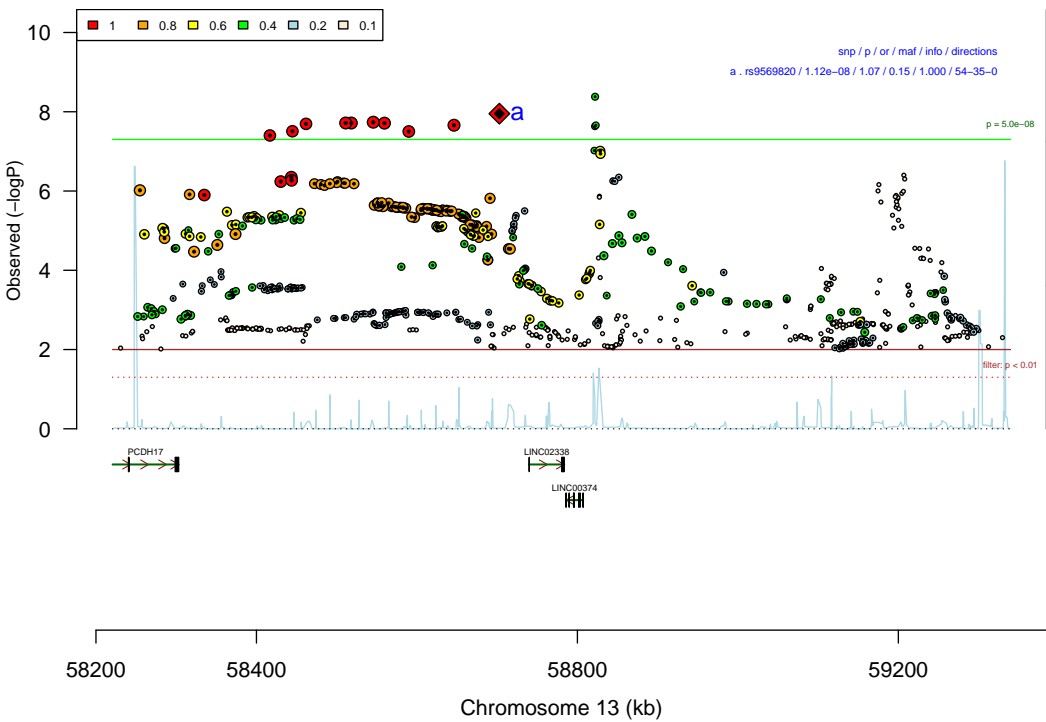

SCZ\_cond-rs9569820-chr13

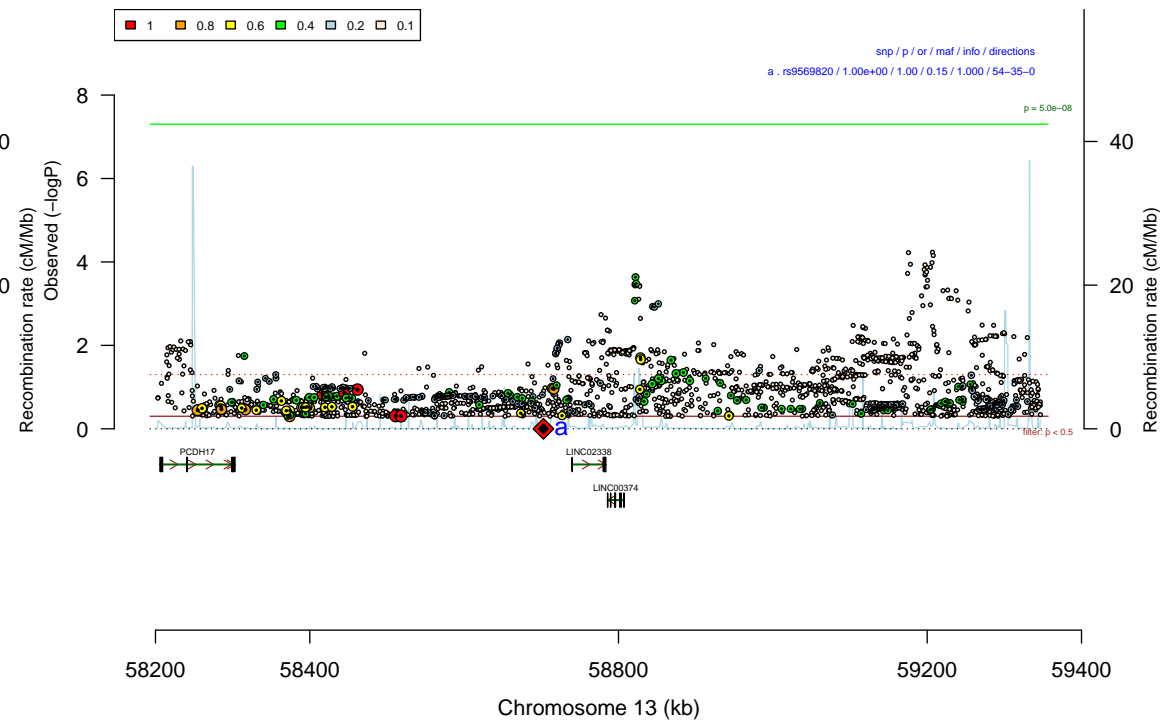

SCZ\_uncond-rs10985811-chr9

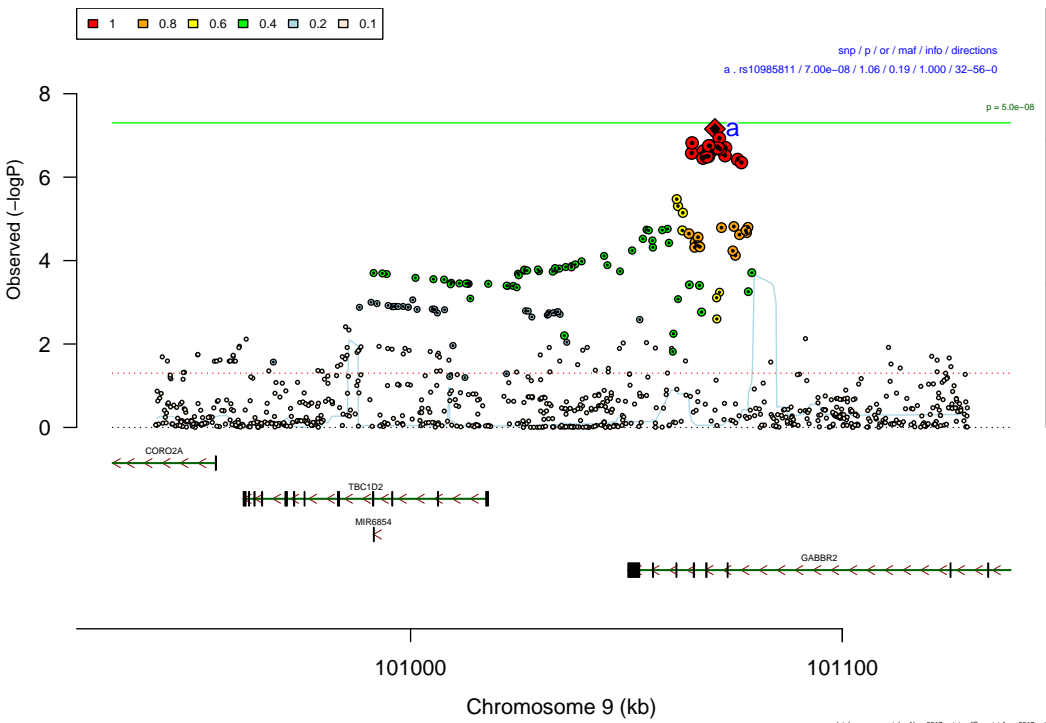

SCZ\_cond-rs10985811-chr9

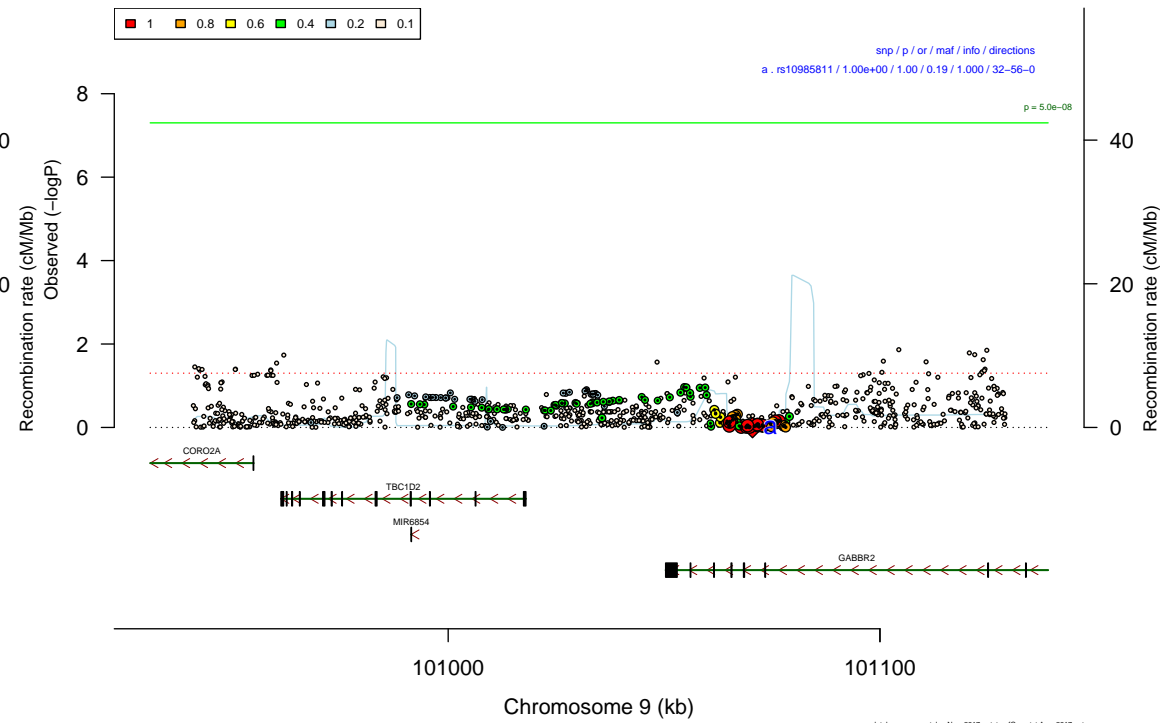

SCZ\_uncond-rs2686386-chr12

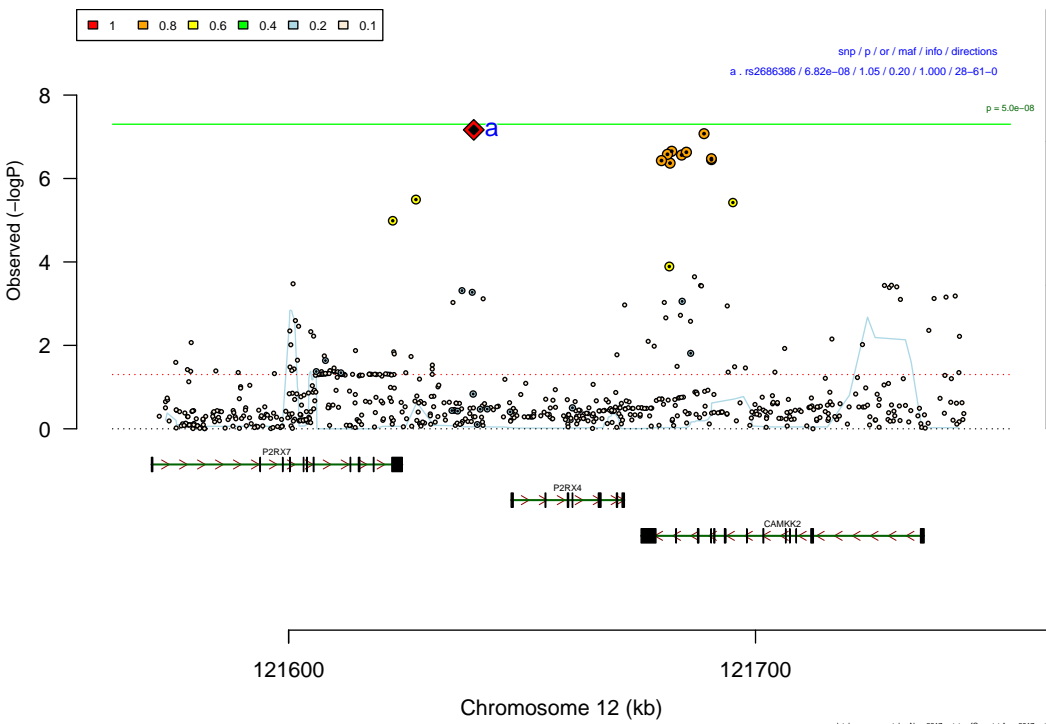

SCZ\_cond-rs2686386-chr12

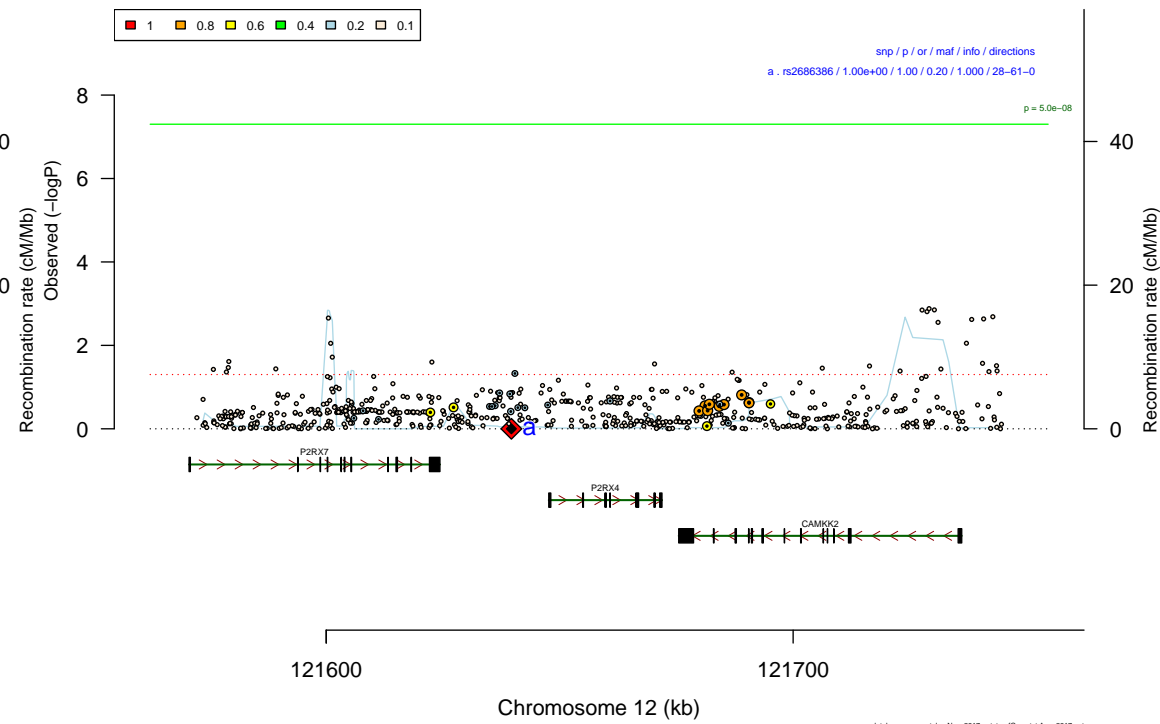



SCZ\_uncond-rs1589726-chr7

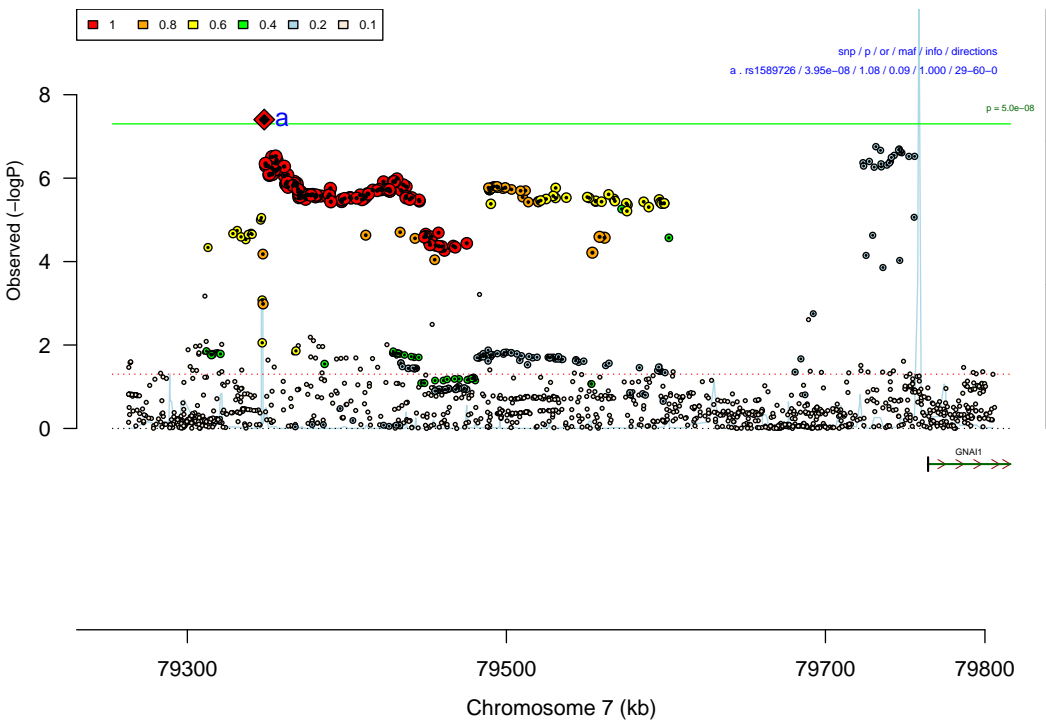

SCZ\_cond-rs1589726-chr7

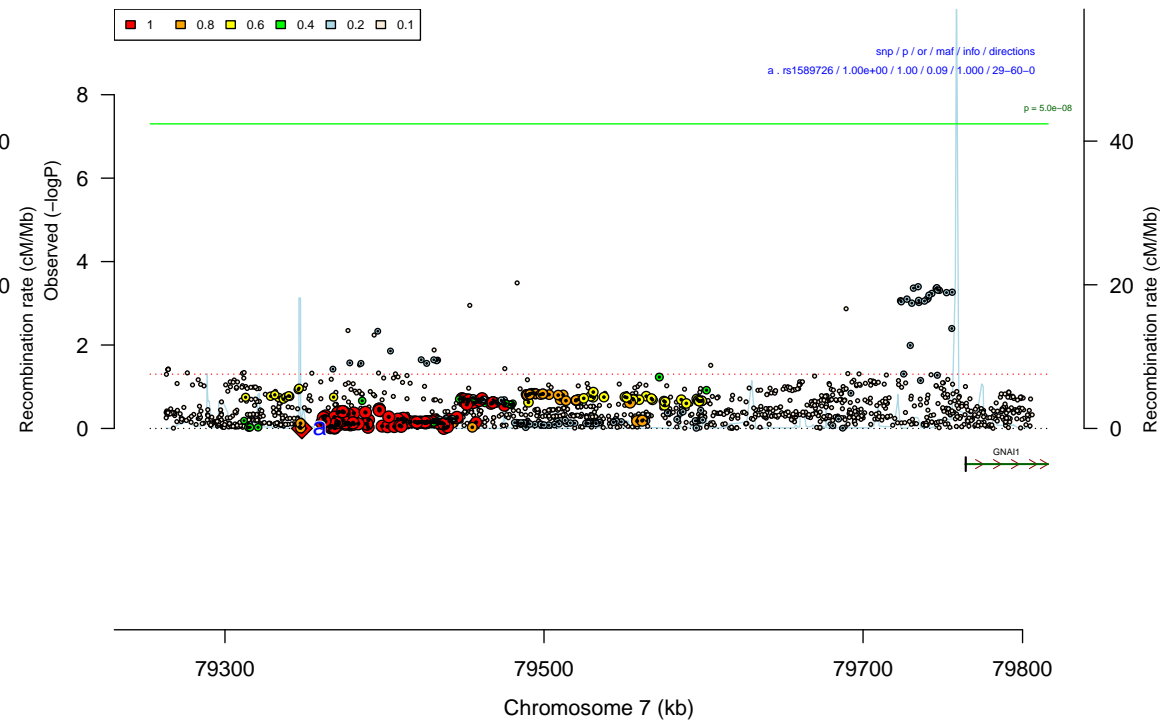

SCZ\_uncond-rs10861176-chr12

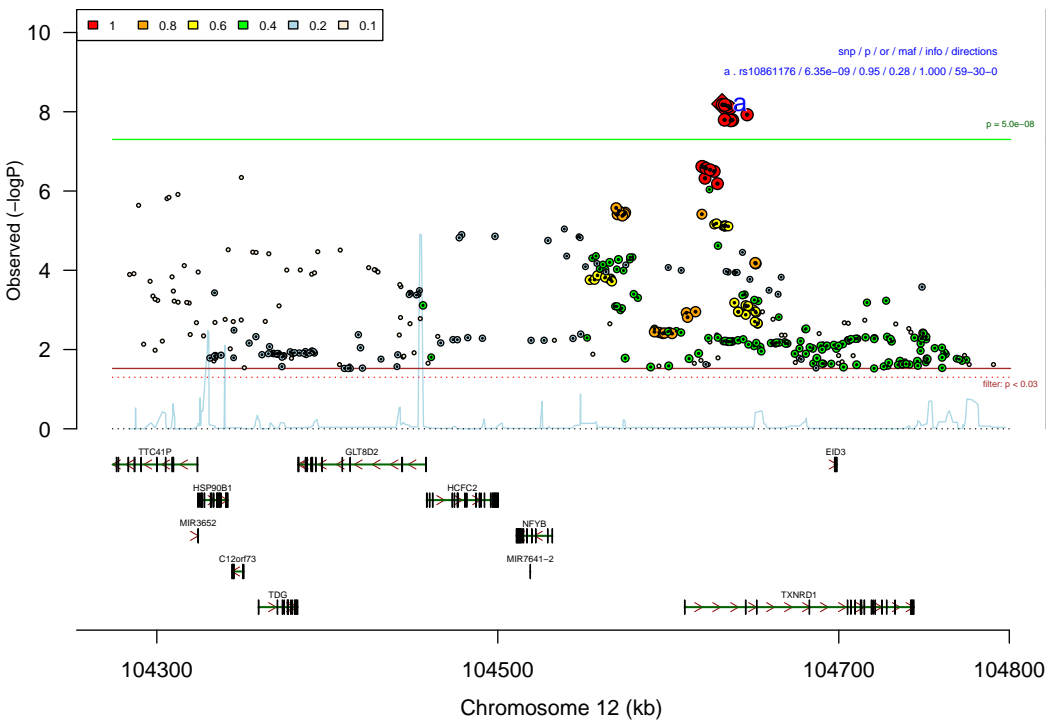

SCZ\_cond-rs10861176-chr12

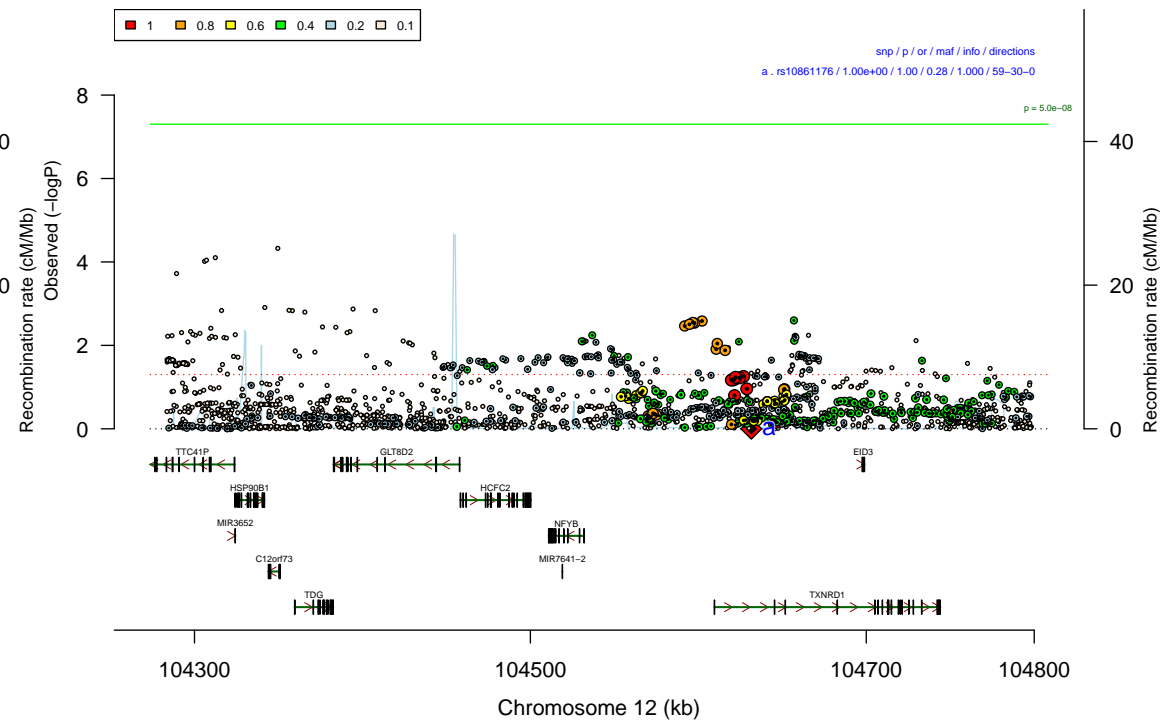

SCZ\_uncond-rs28454198-chr4

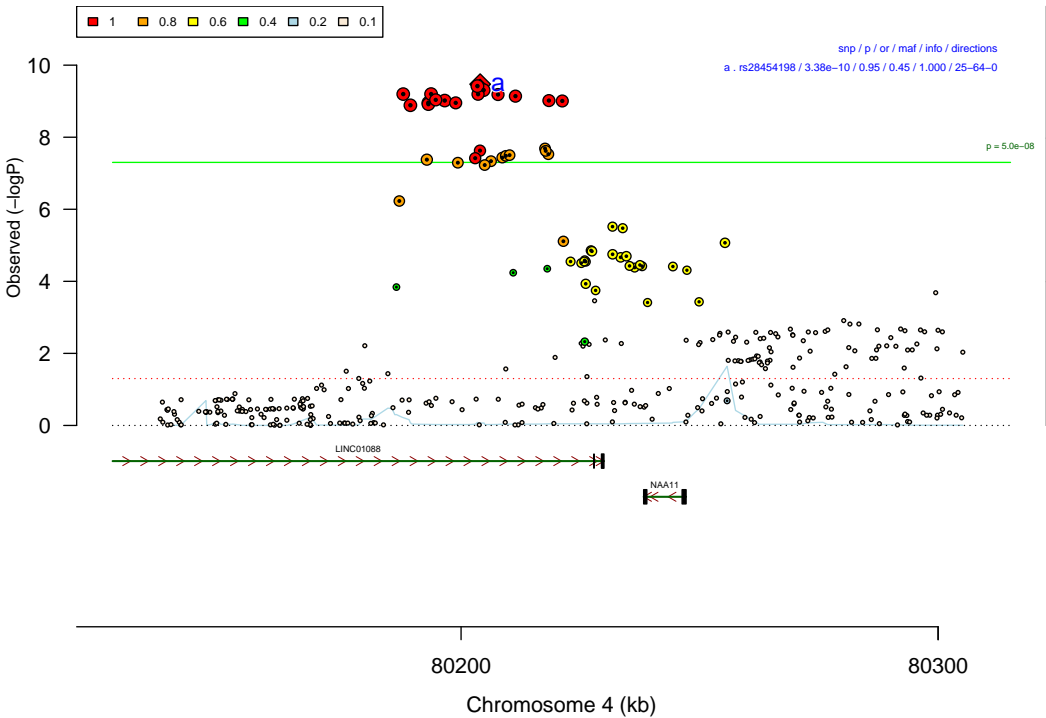

SCZ\_cond-rs28454198-chr4

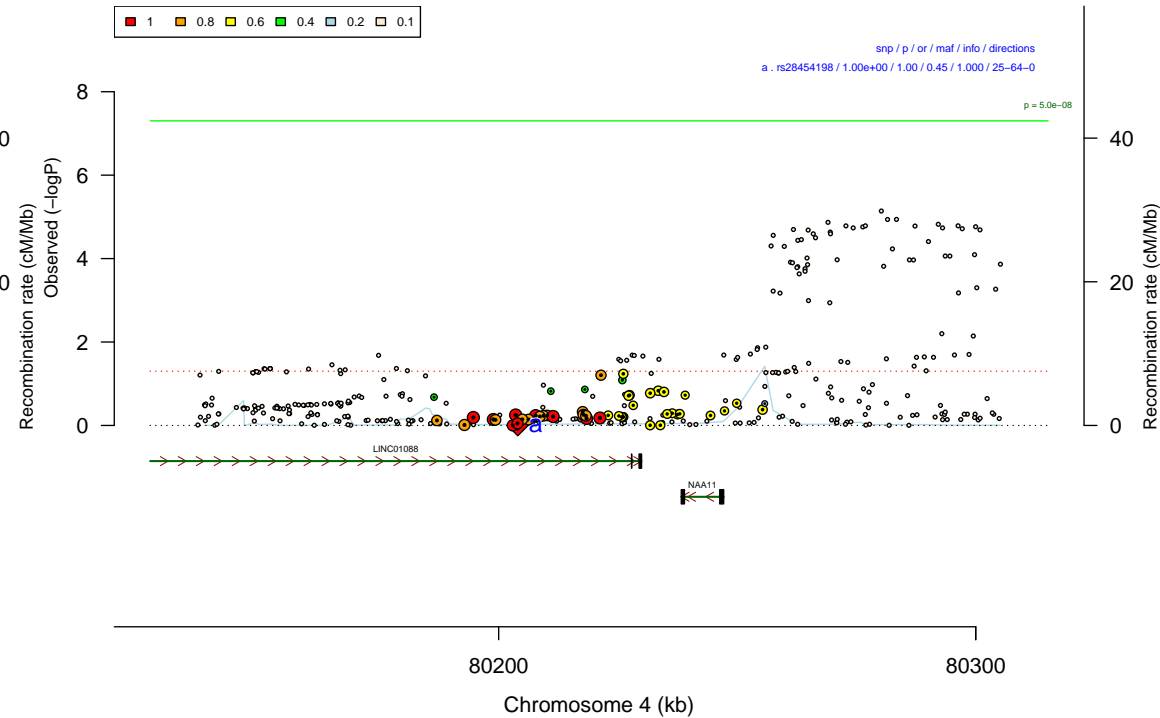

SCZ\_uncond-rs4915203-chr1

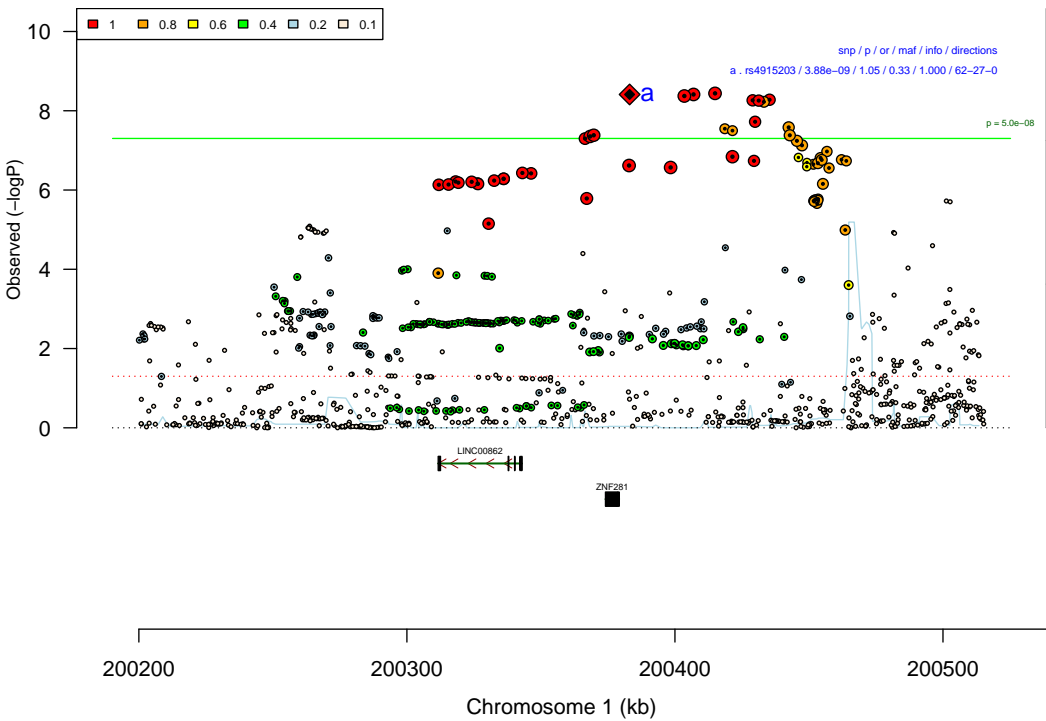

SCZ\_cond-rs4915203-chr1

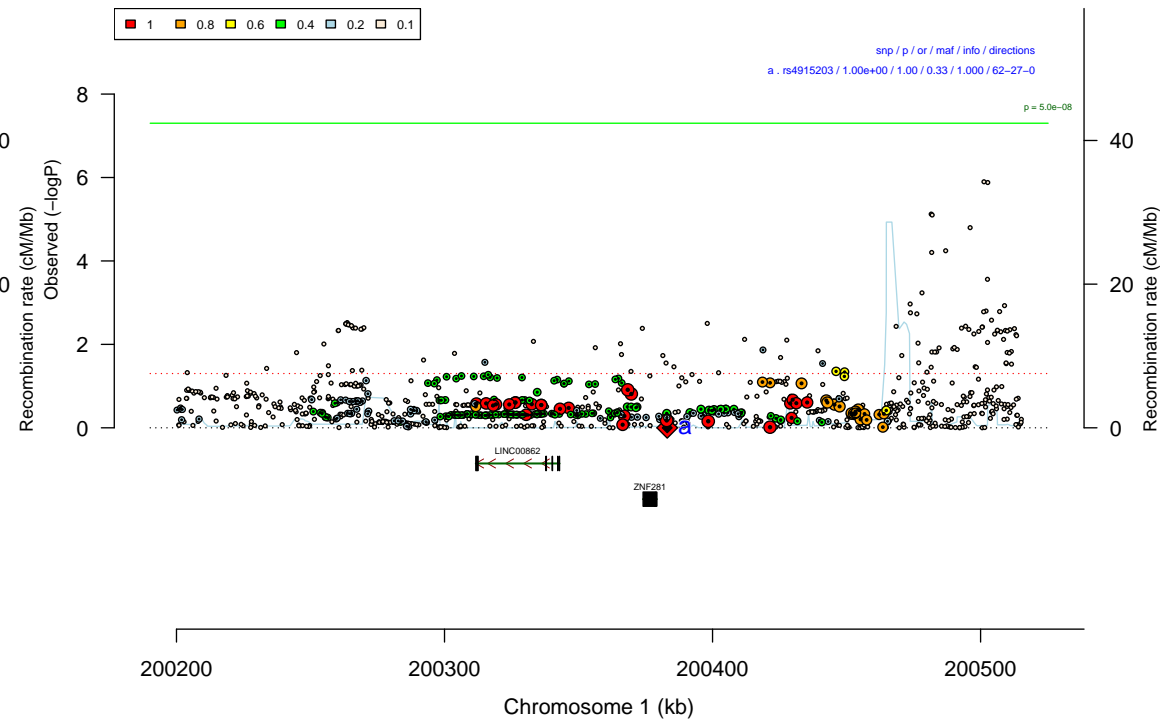

SCZ\_uncond-rs3739554-chr9

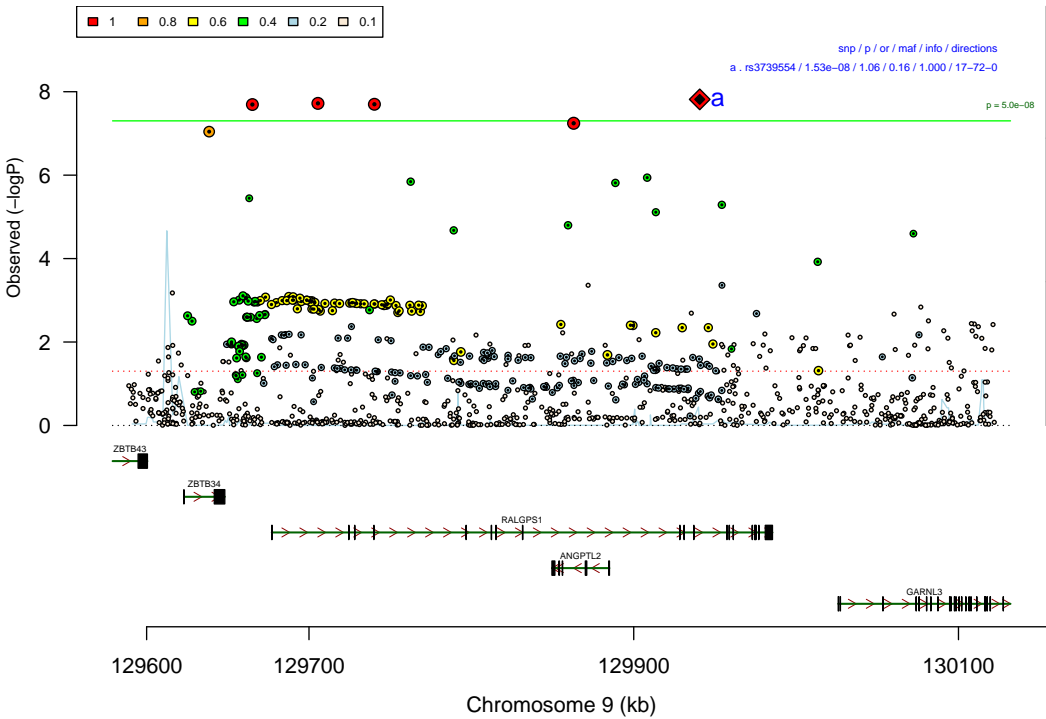

SCZ\_cond-rs3739554-chr9

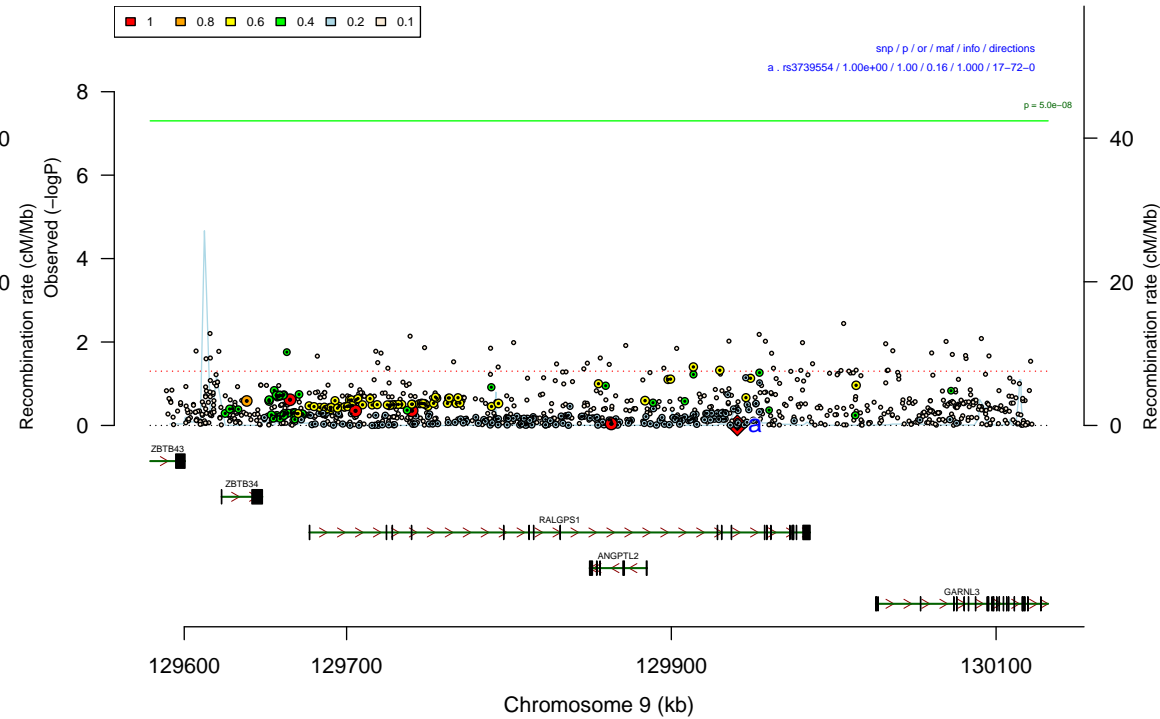

SCZ\_uncond-rs11740474-chr5

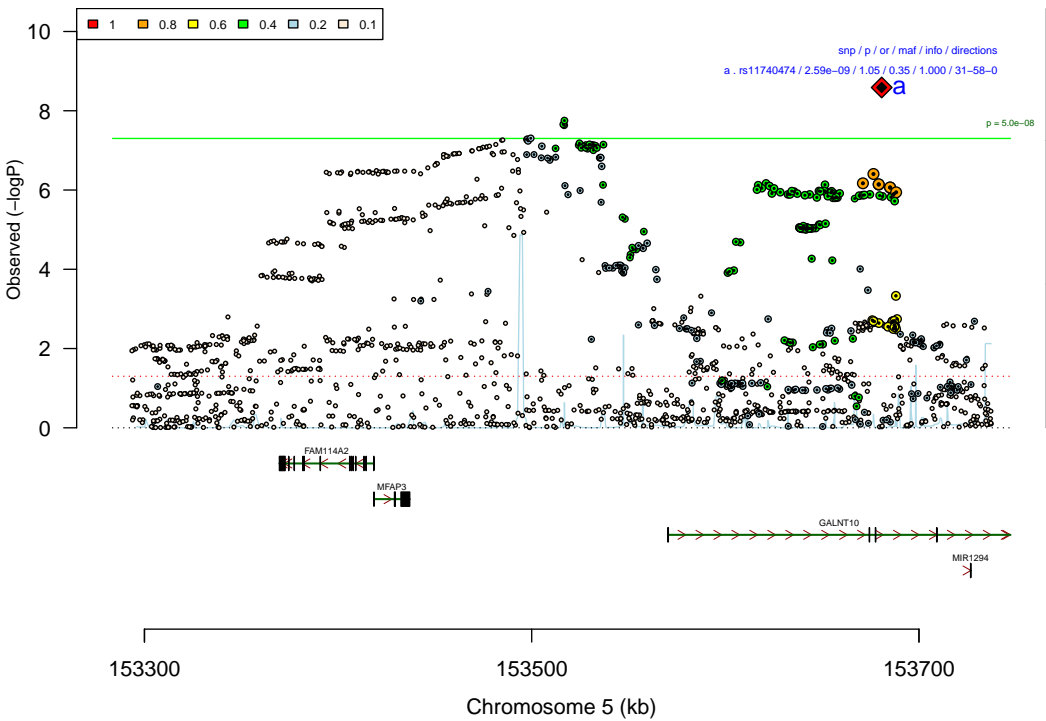

SCZ\_cond-rs11740474-chr5

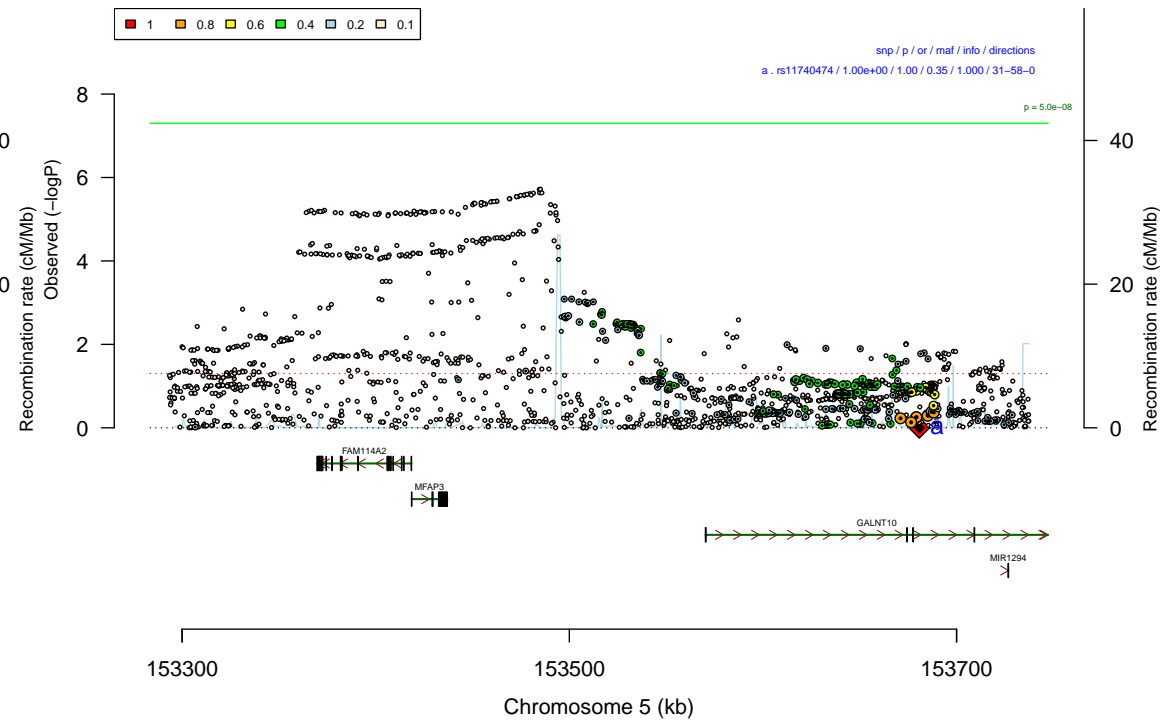

SCZ\_uncond-rs2455415-chr13

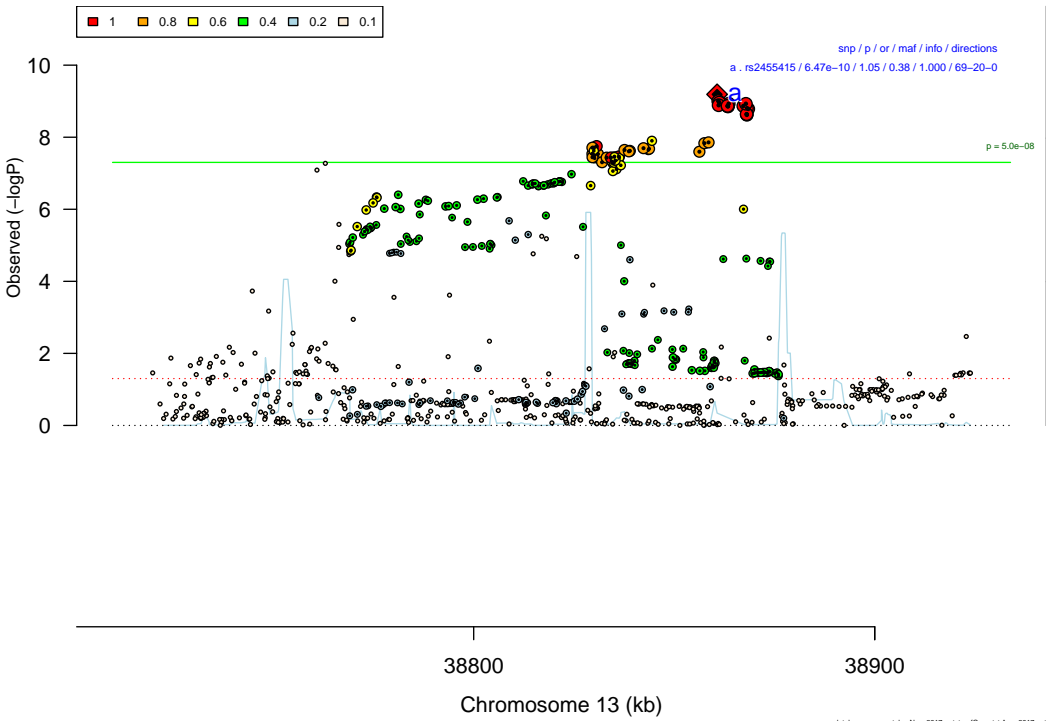

SCZ\_cond-rs2455415-chr13

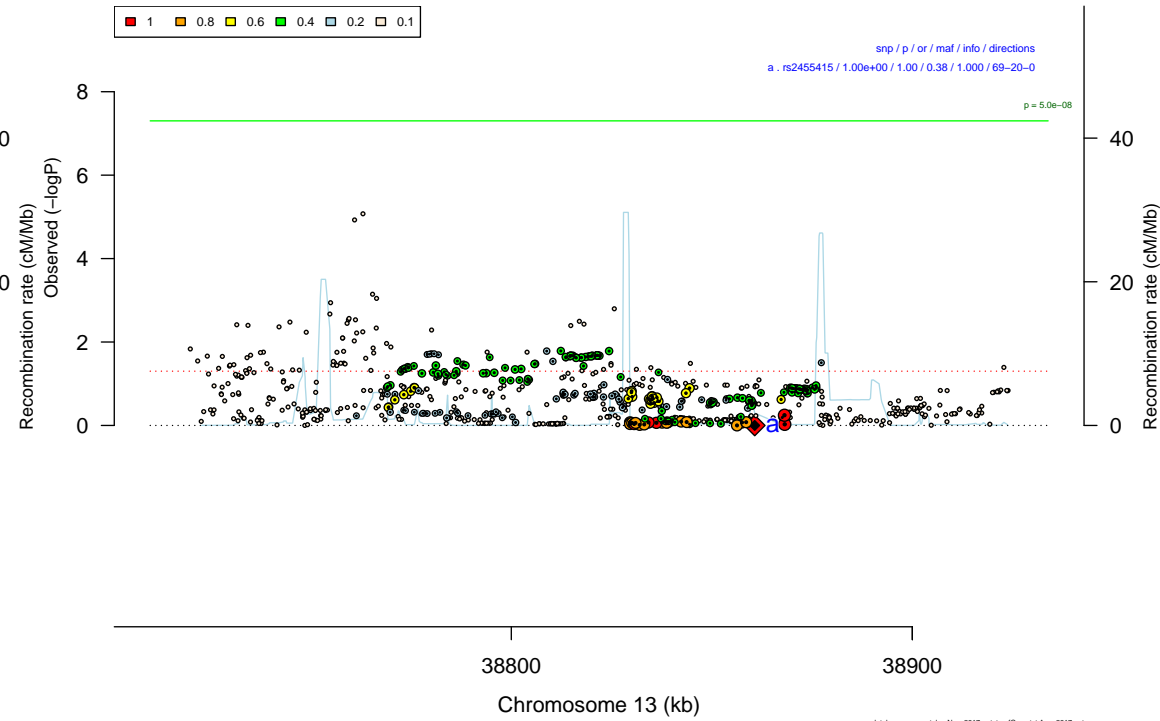

SCZ\_uncond-rs12301769-chr12

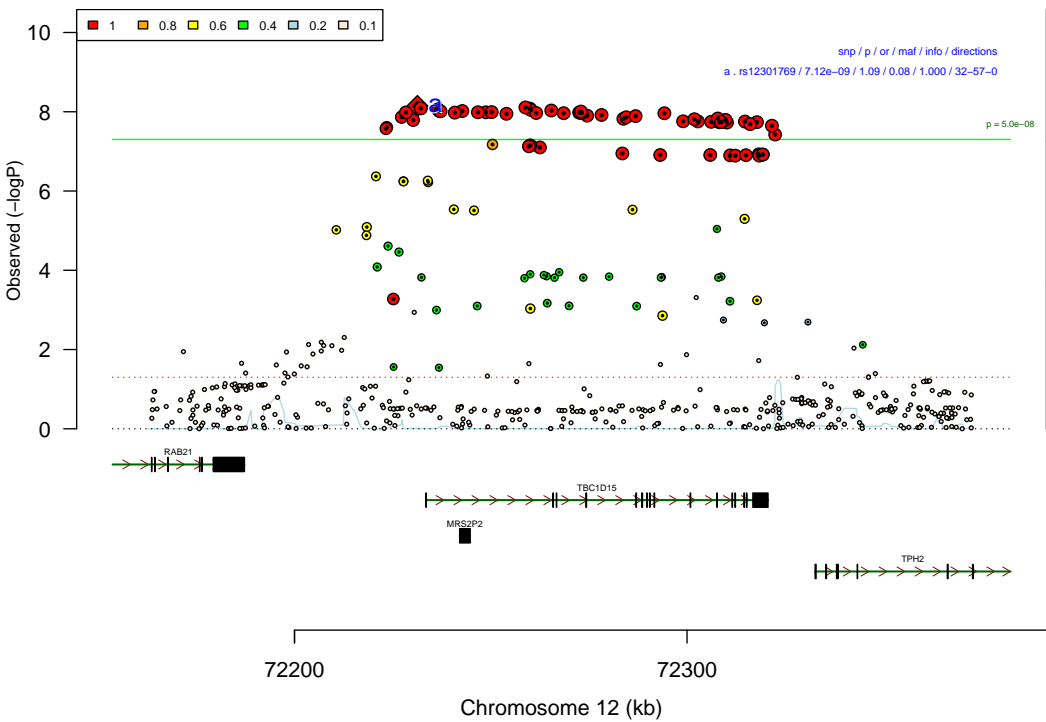

SCZ\_cond-rs12301769-chr12

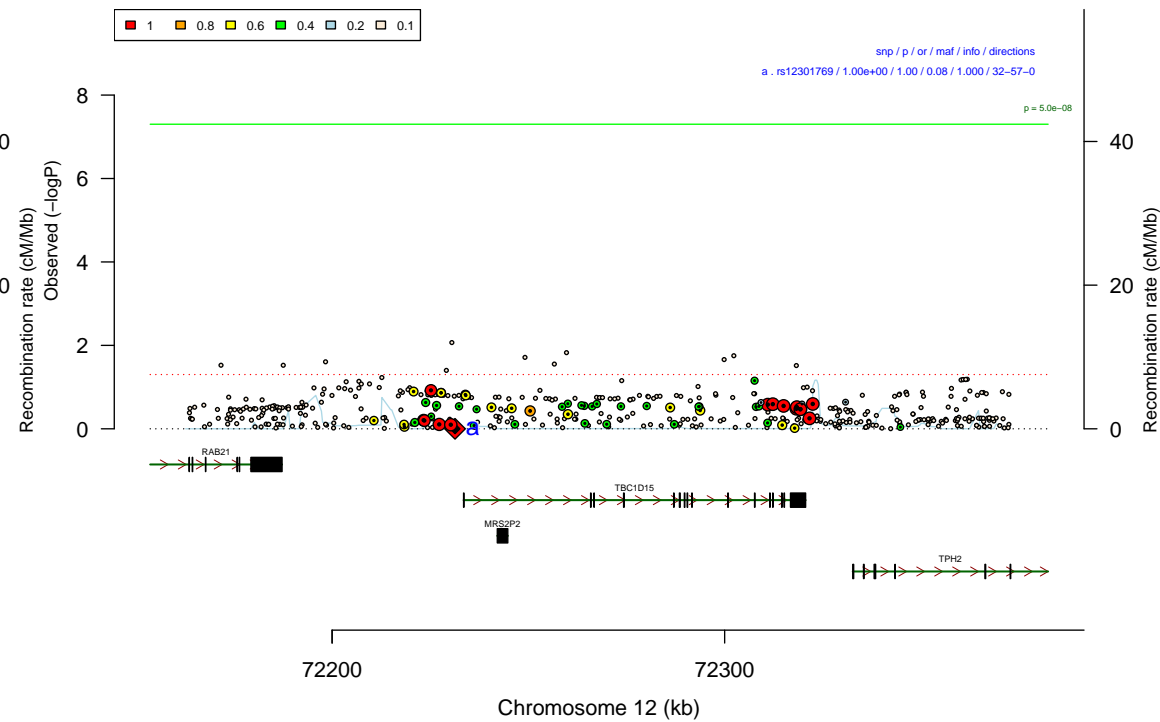

SCZ\_uncond-rs578470-chr12

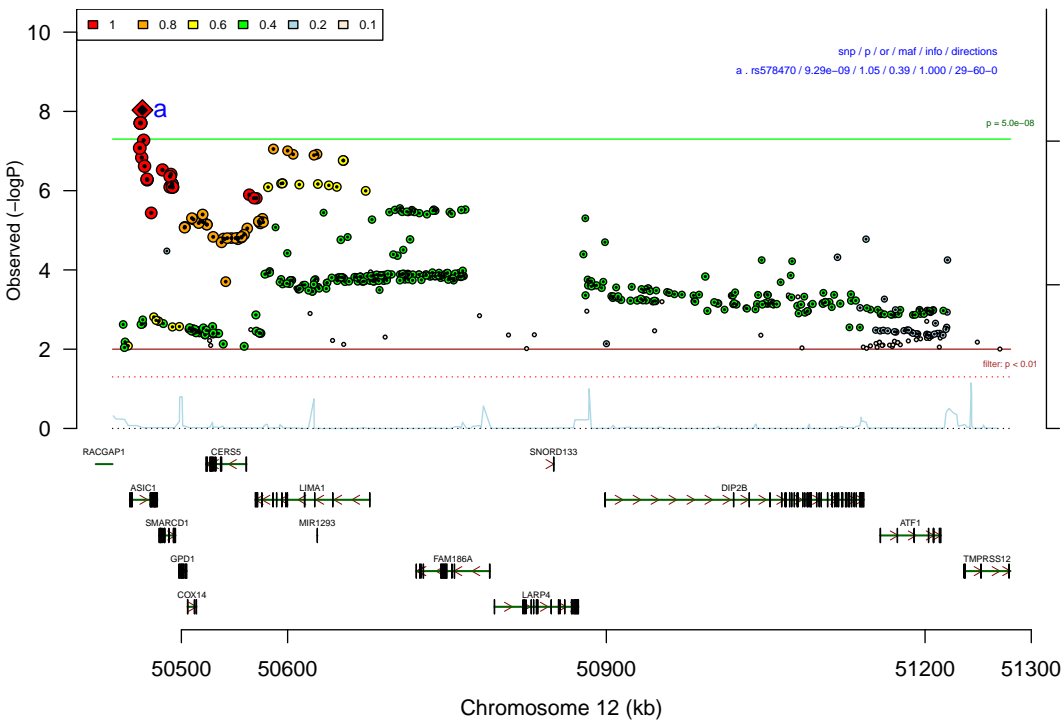

SCZ\_cond-rs578470-chr12

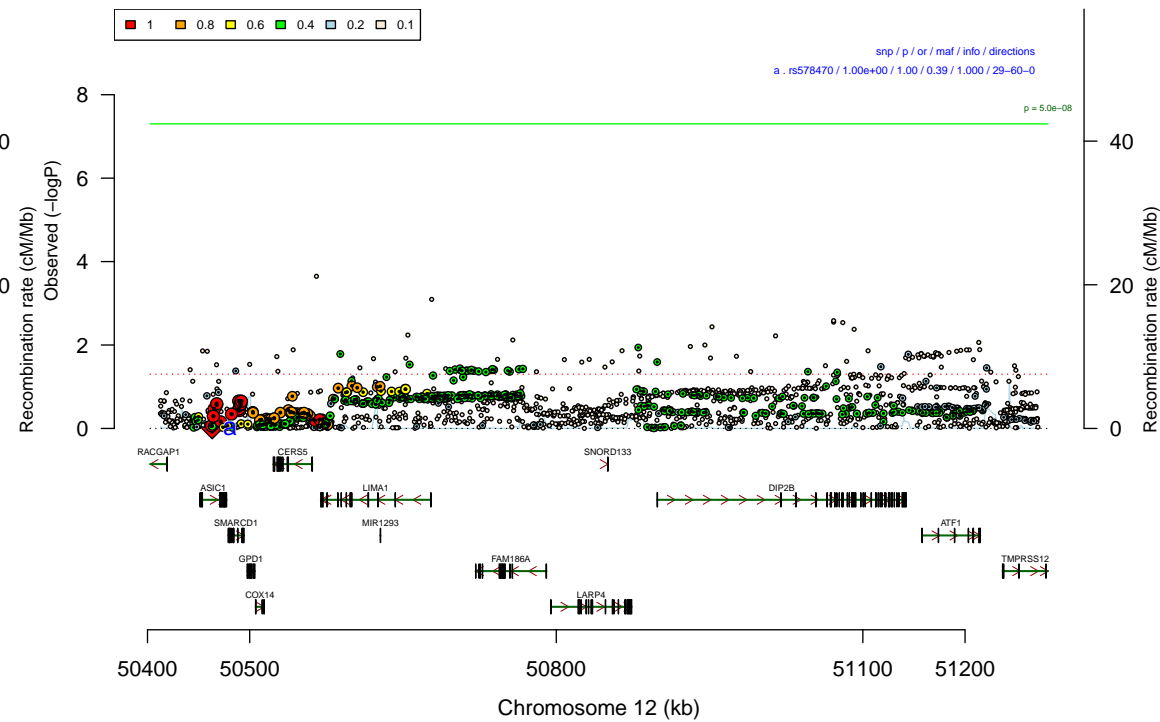

SCZ\_uncond-rs60135207-chr3

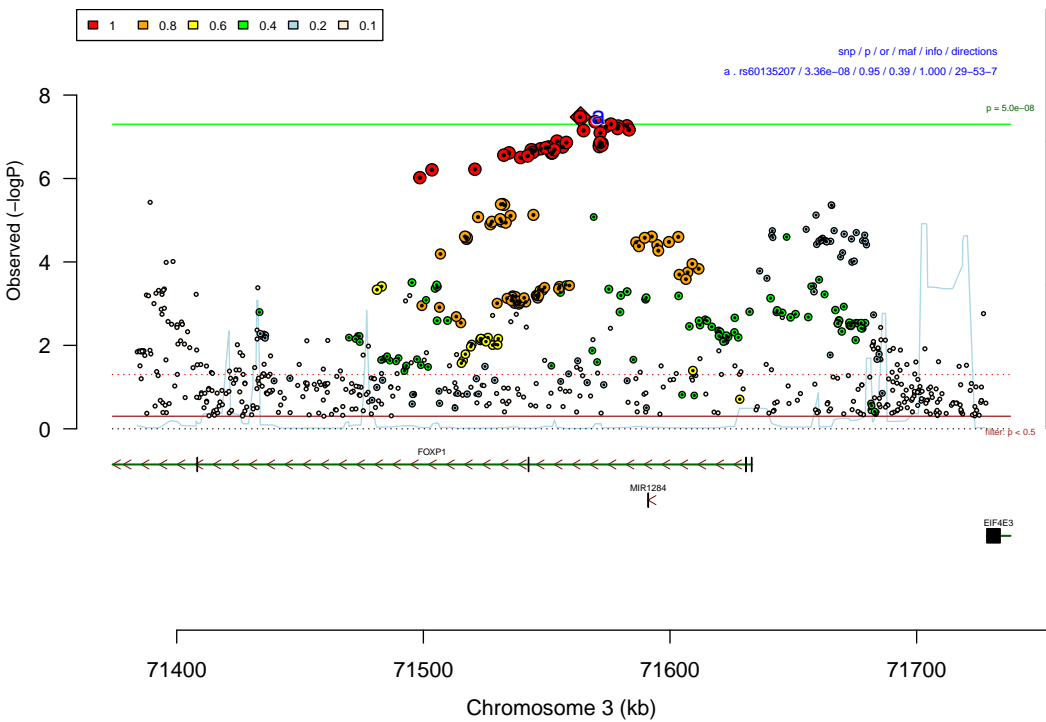

SCZ\_cond-rs60135207-chr3

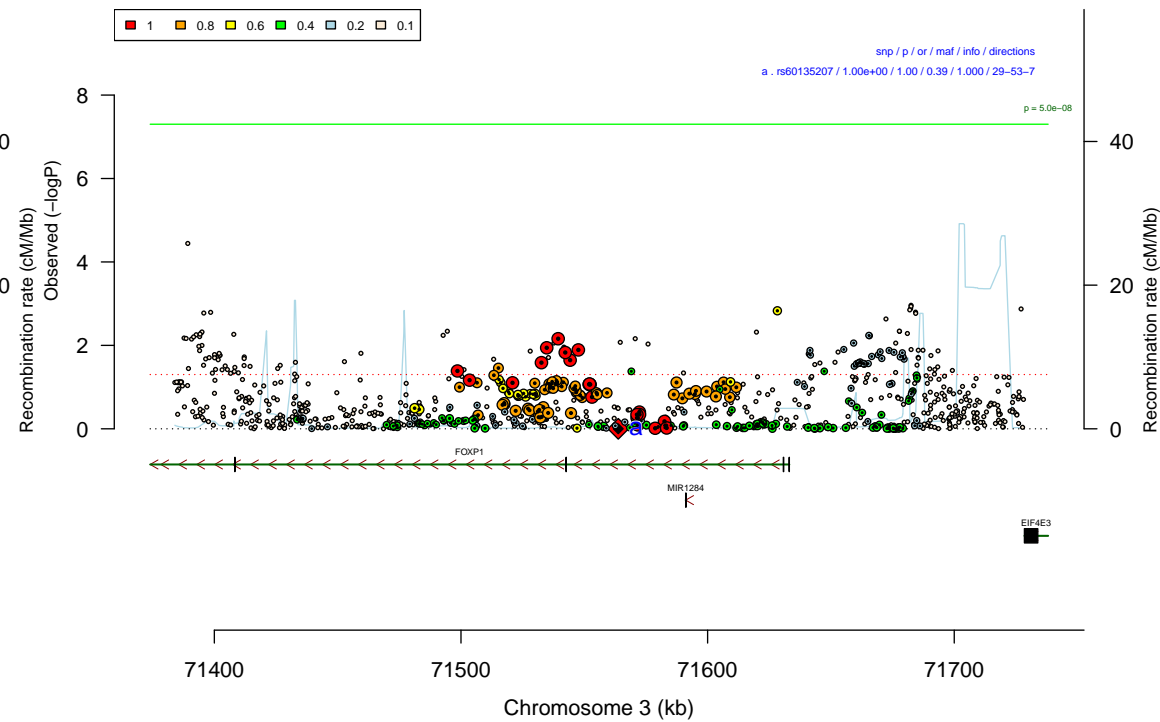

SCZ\_uncond-rs4779050-chr15

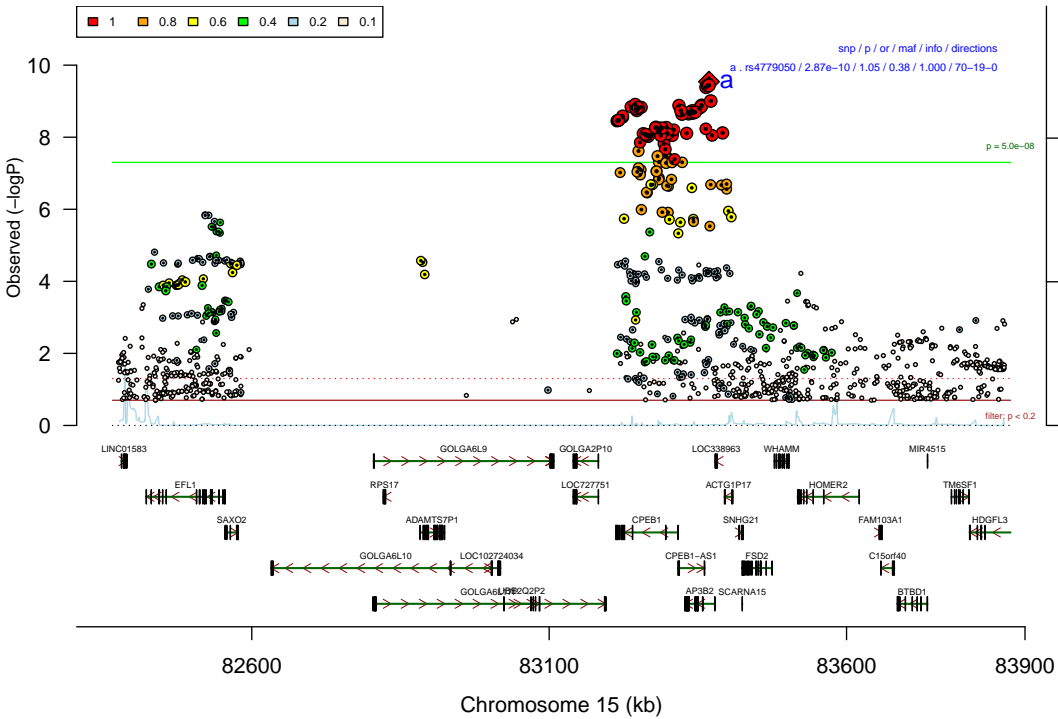

SCZ\_cond-rs4779050-chr15

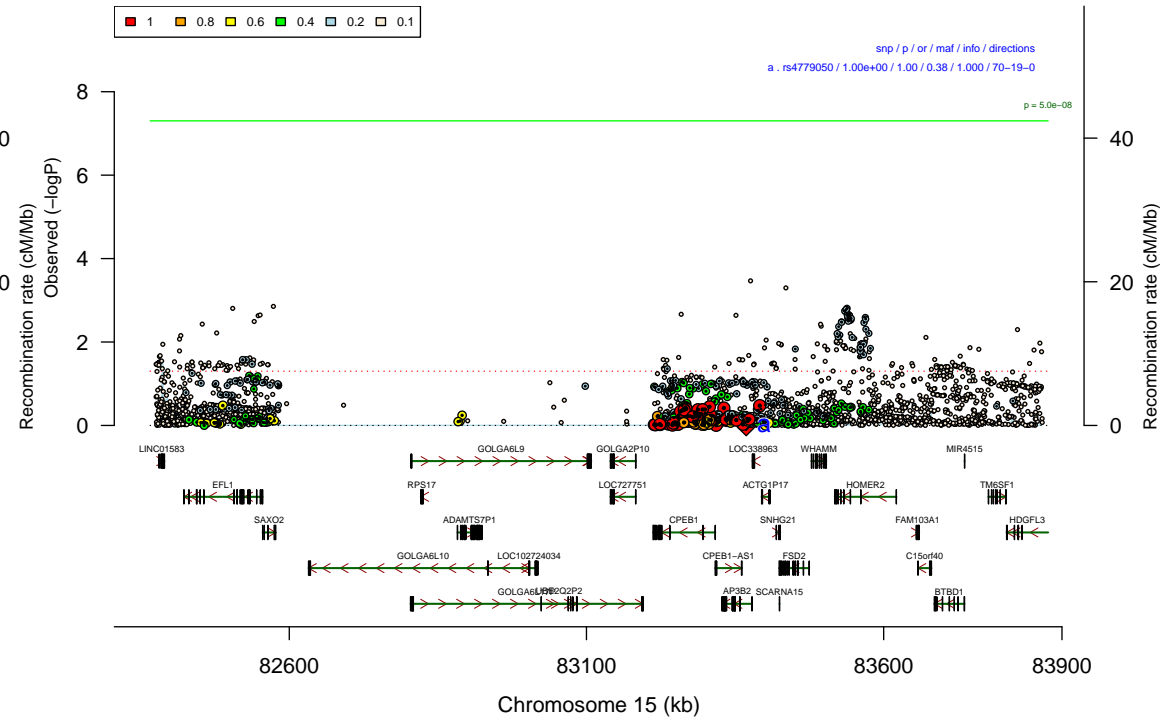

SCZ\_uncond-rs12431743-chr14

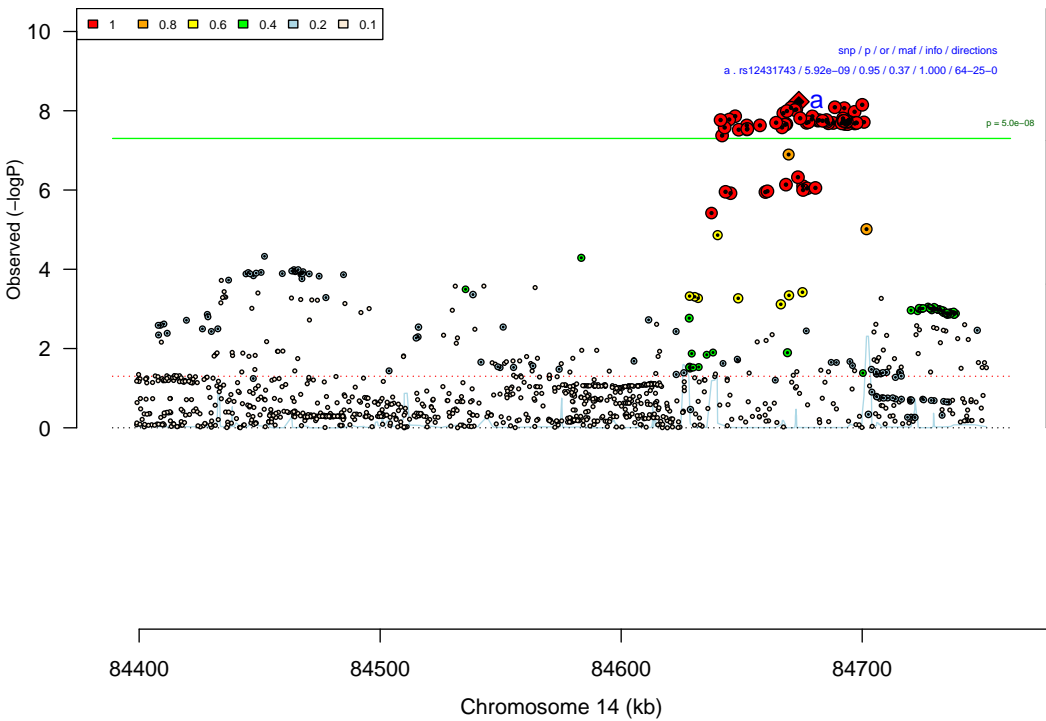

SCZ\_cond-rs12431743-chr14

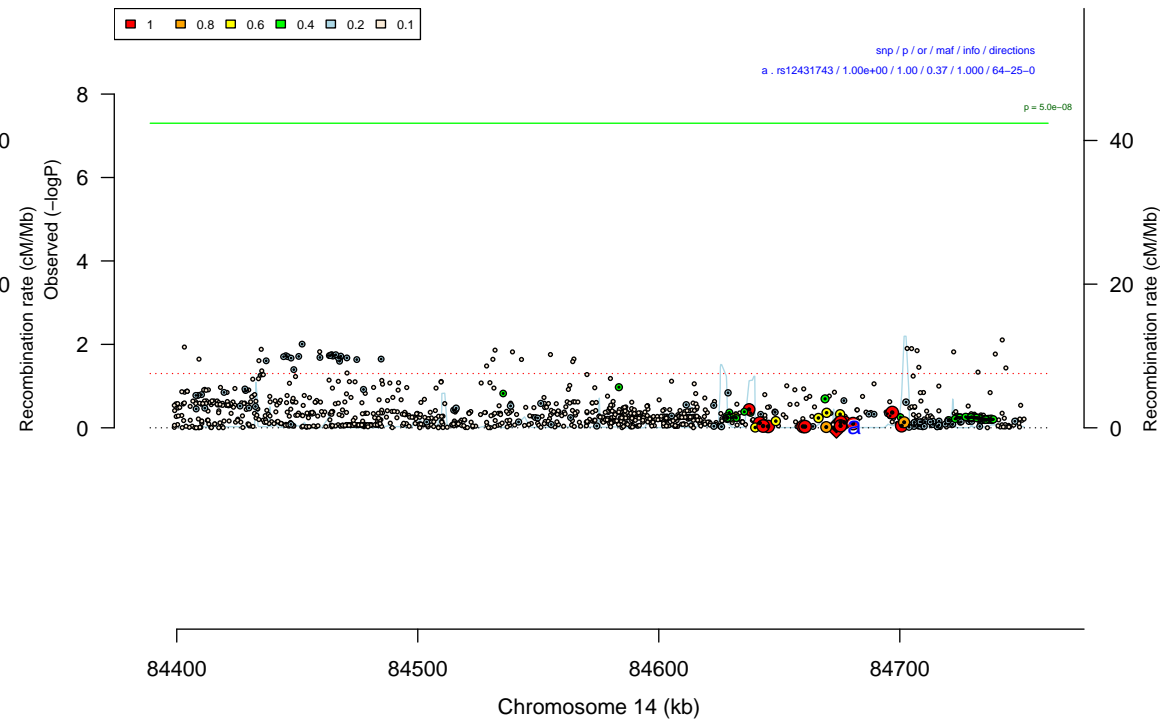

SCZ\_uncond-rs61857878-chr10

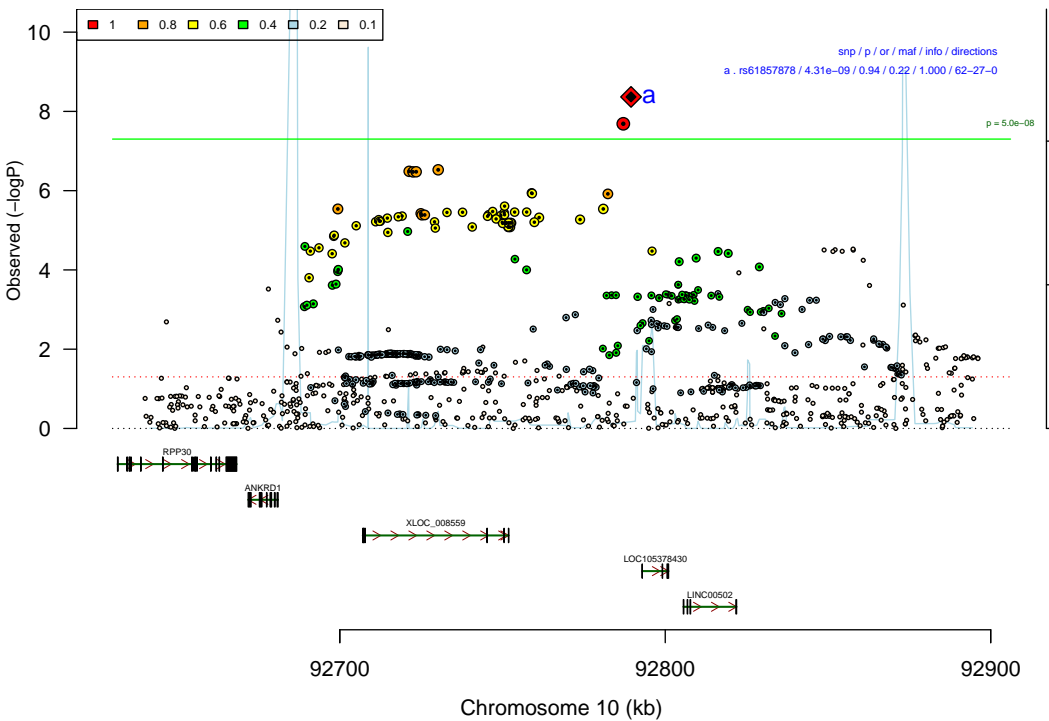

SCZ\_cond-rs61857878-chr10

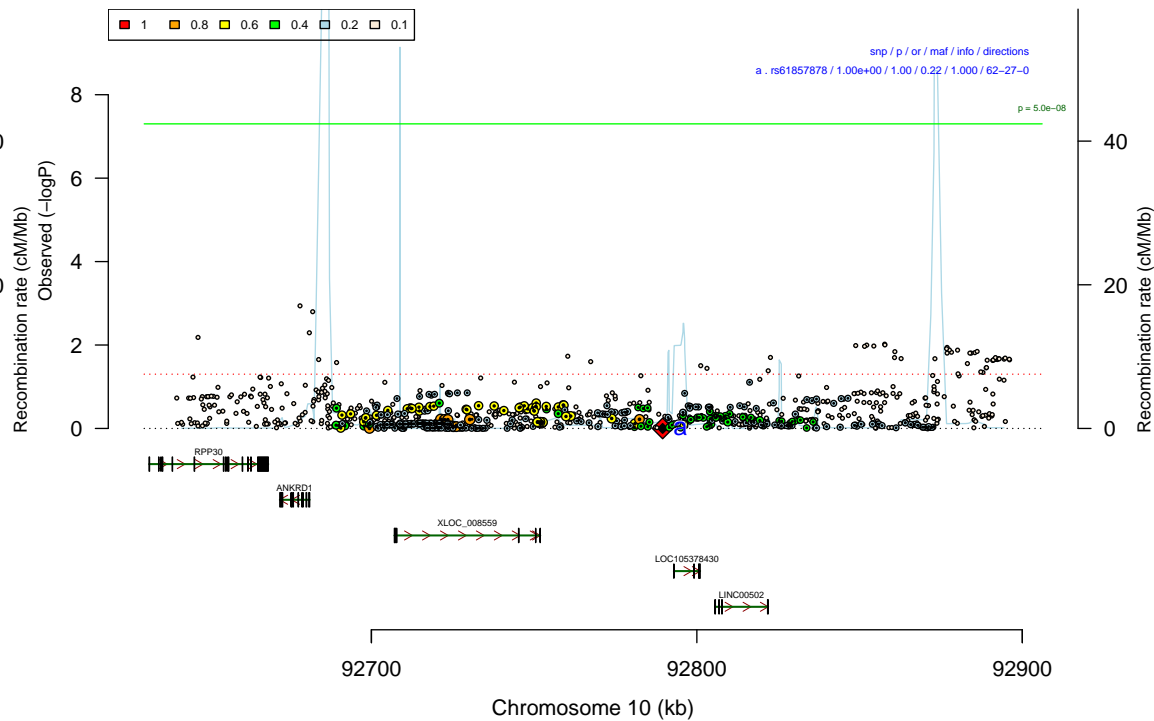

SCZ\_uncond-rs1924377-chr13

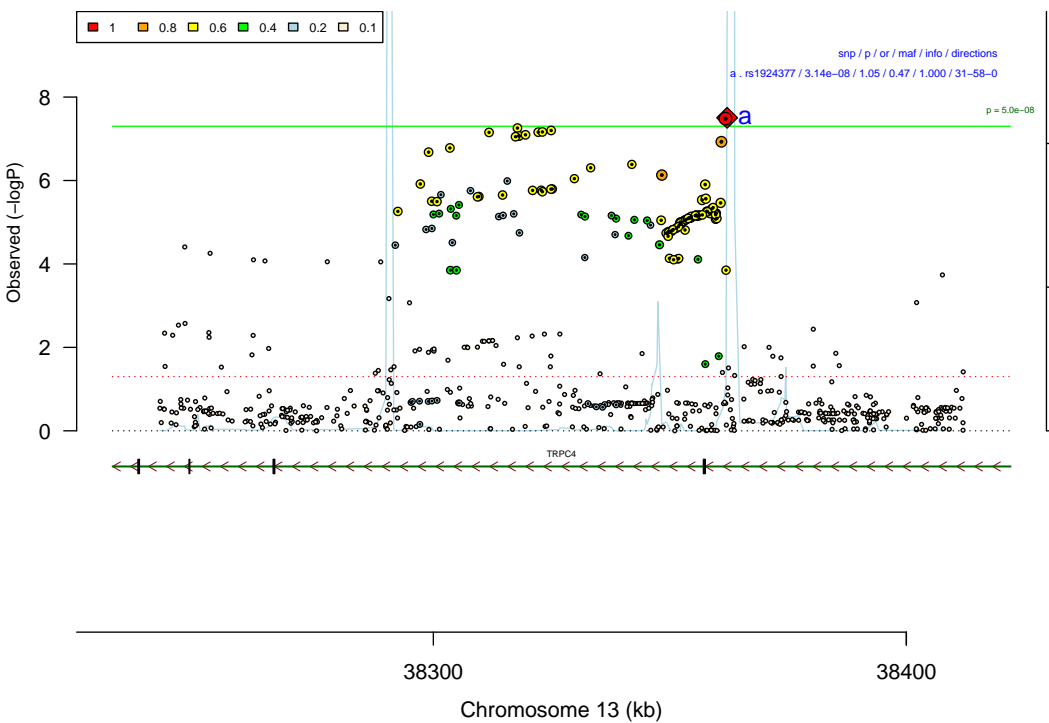

SCZ\_cond-rs1924377-chr13

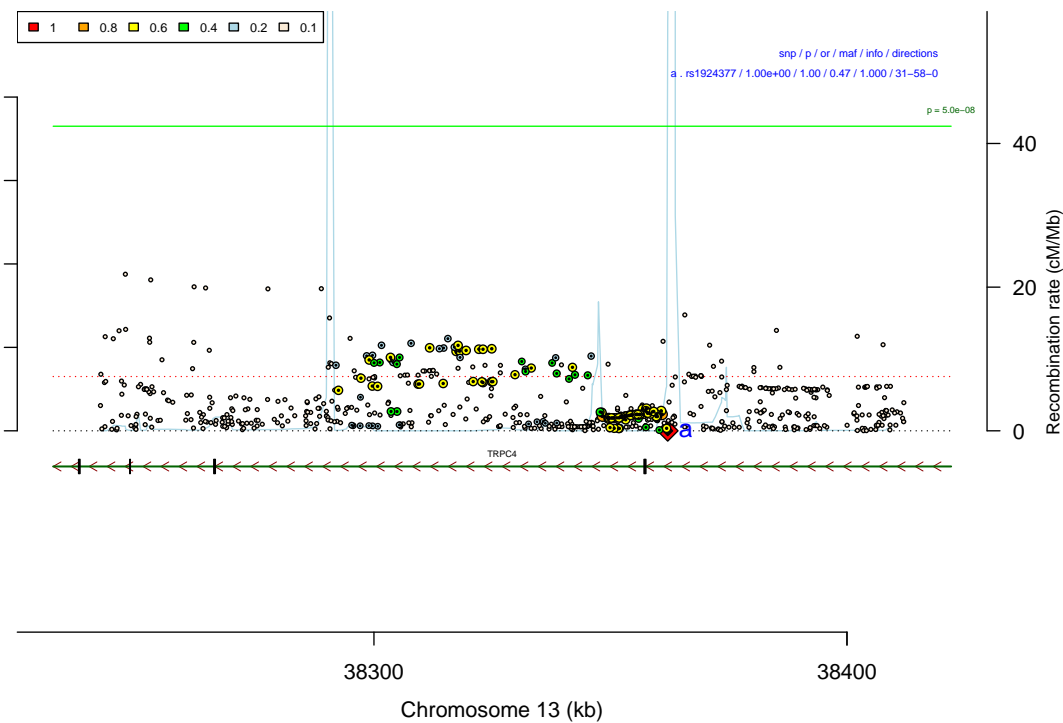

SCZ\_uncond-rs2905625-chr4

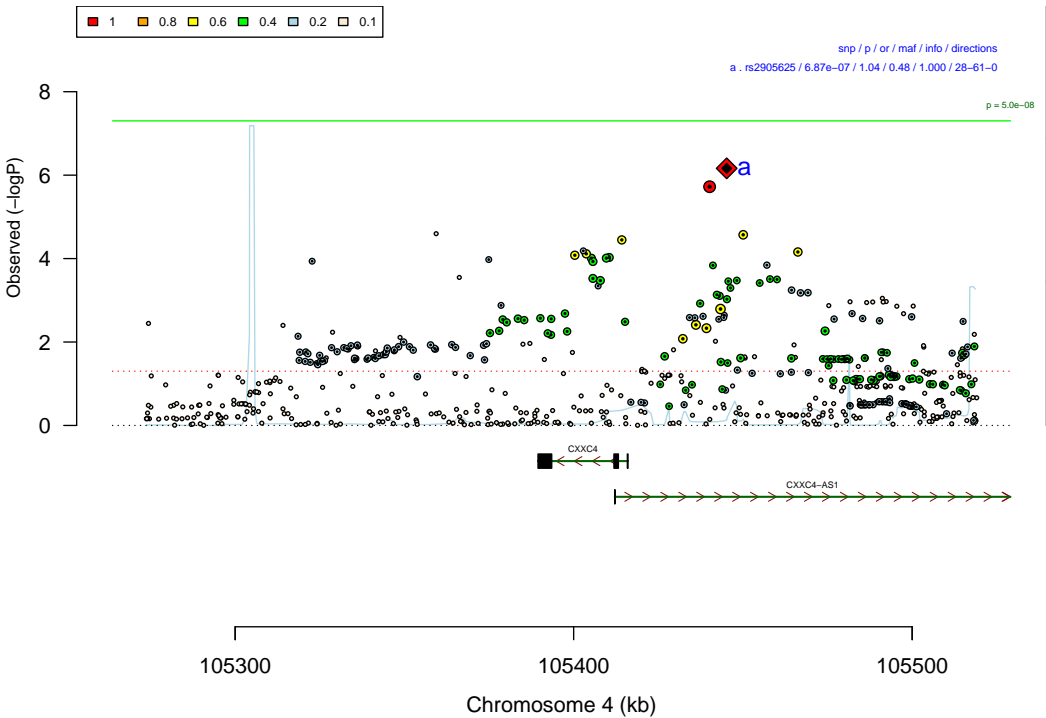

SCZ\_cond-rs2905625-chr4

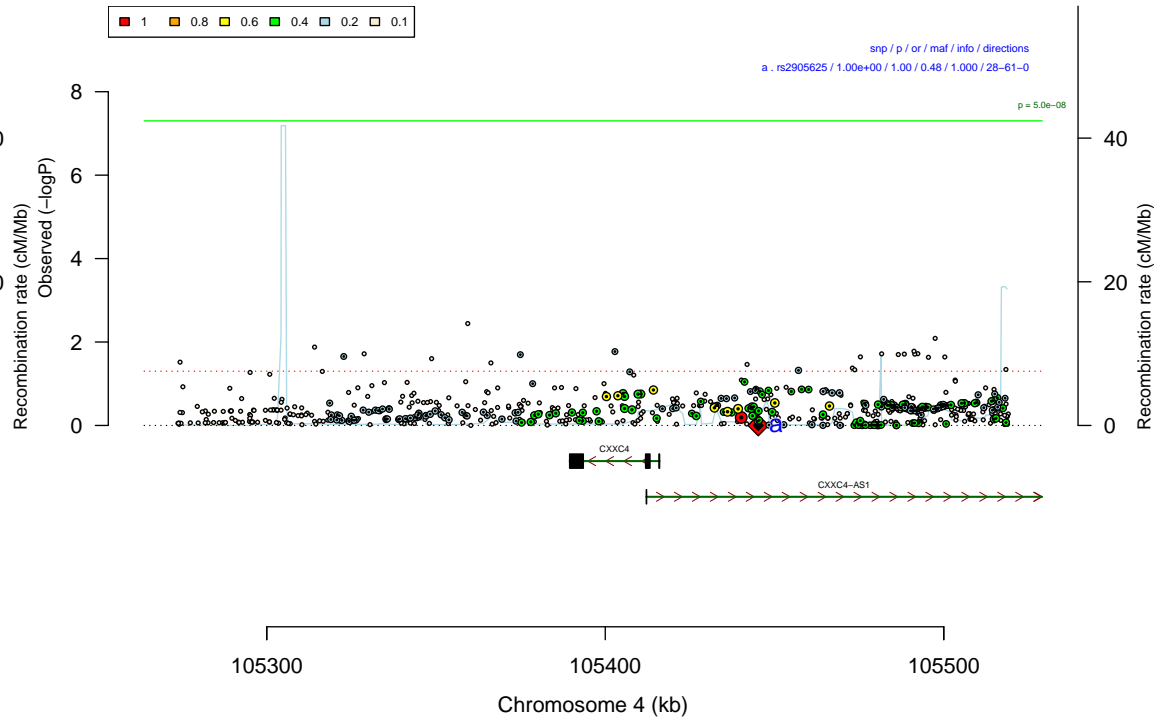

SCZ\_uncond-rs6546857-chr2

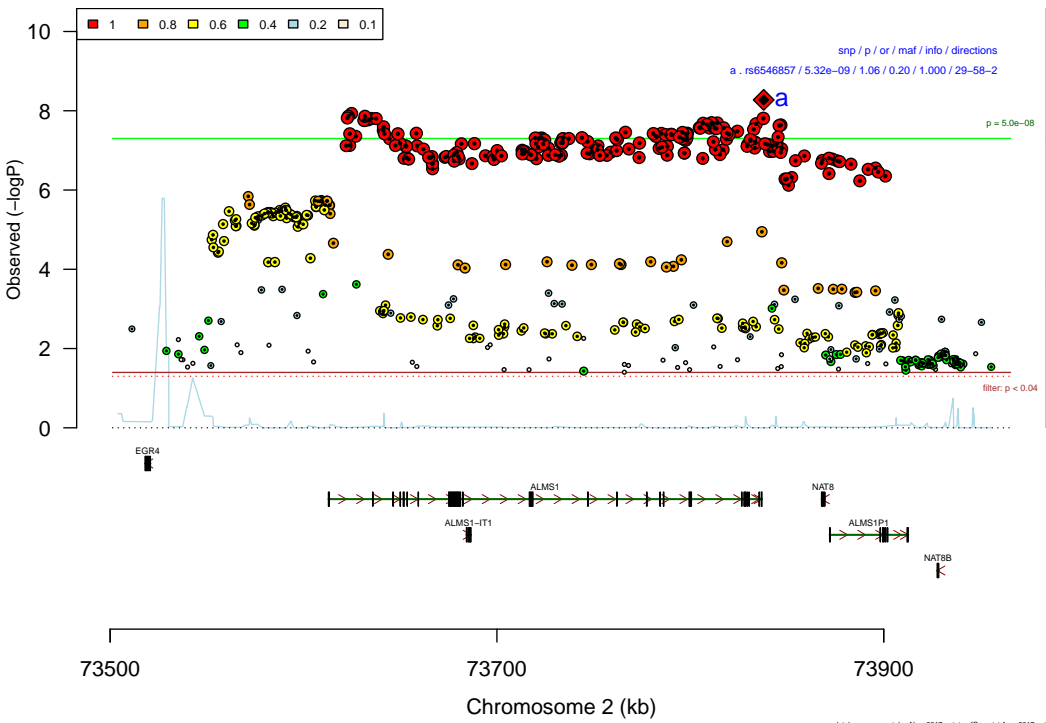

SCZ\_cond-rs6546857-chr2

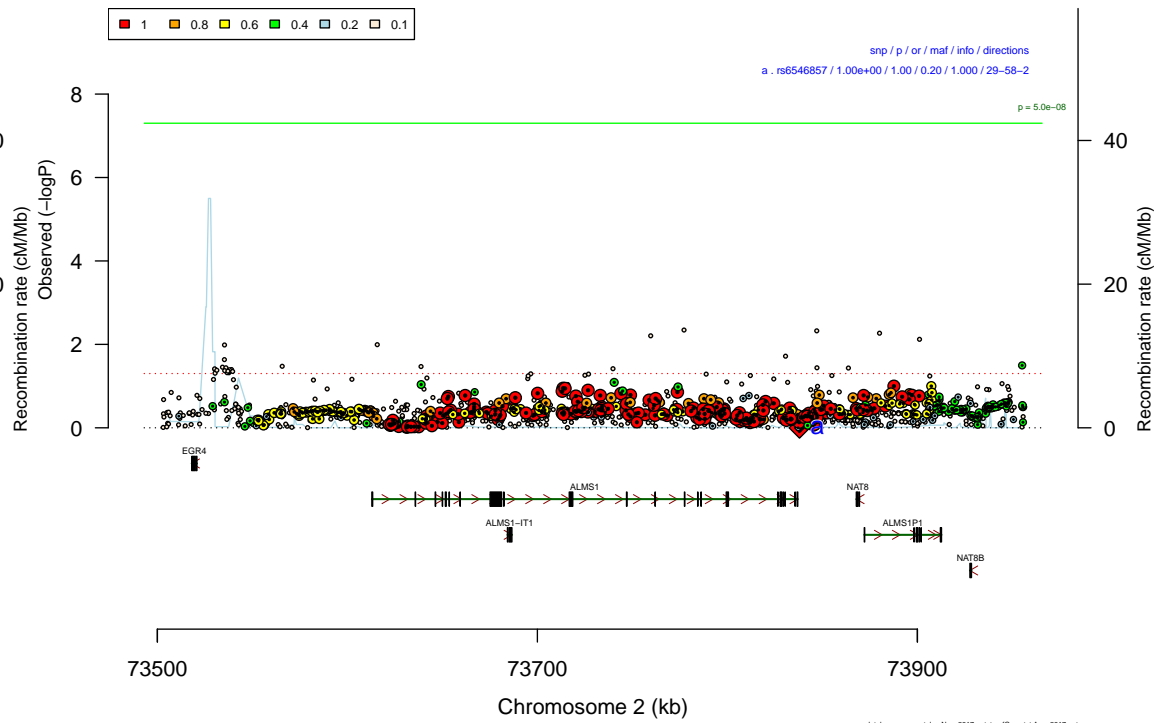



SCZ\_uncond-rs2944821-chr7

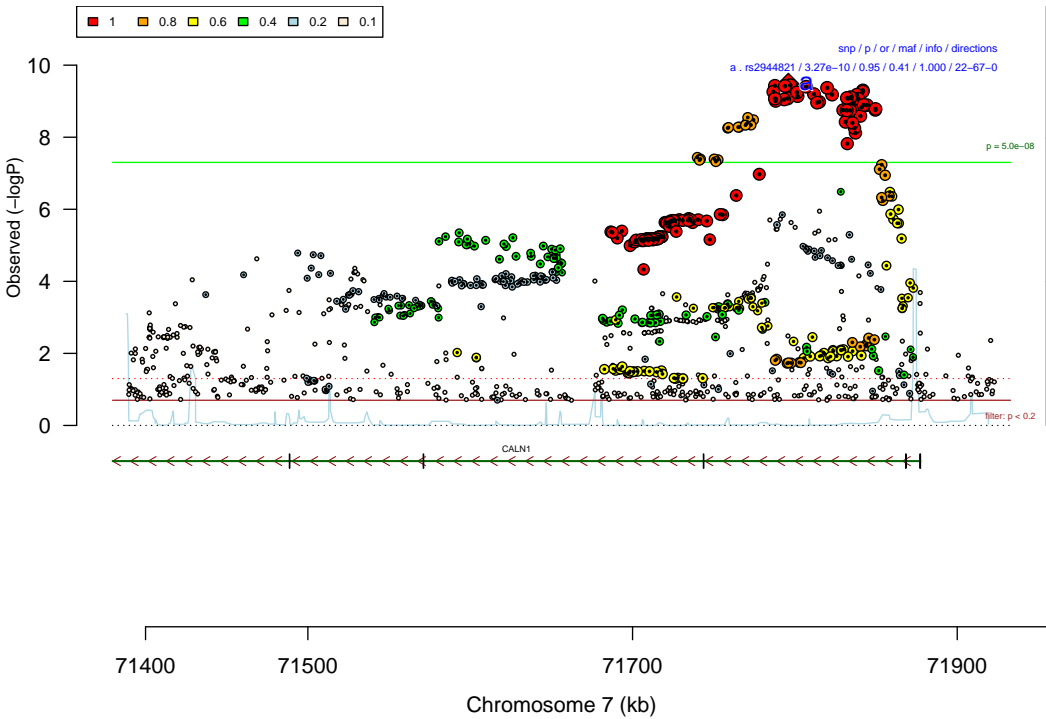

SCZ\_cond-rs2944821-chr7

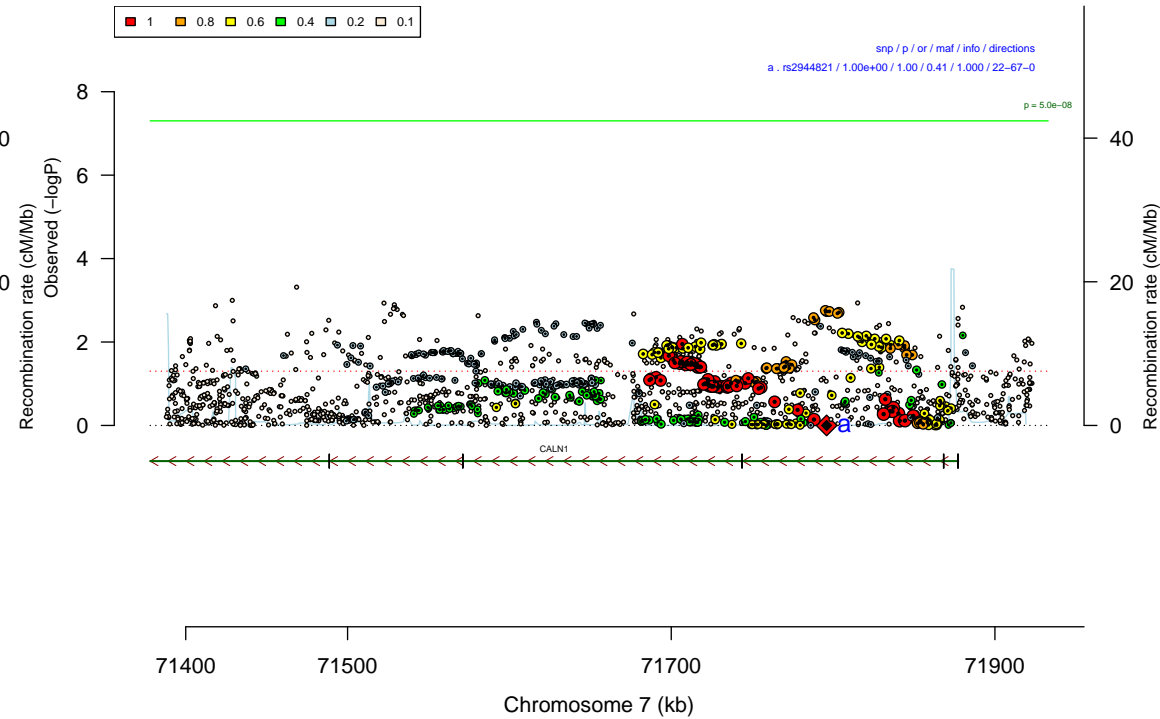

SCZ\_uncond-rs4697446-chr4

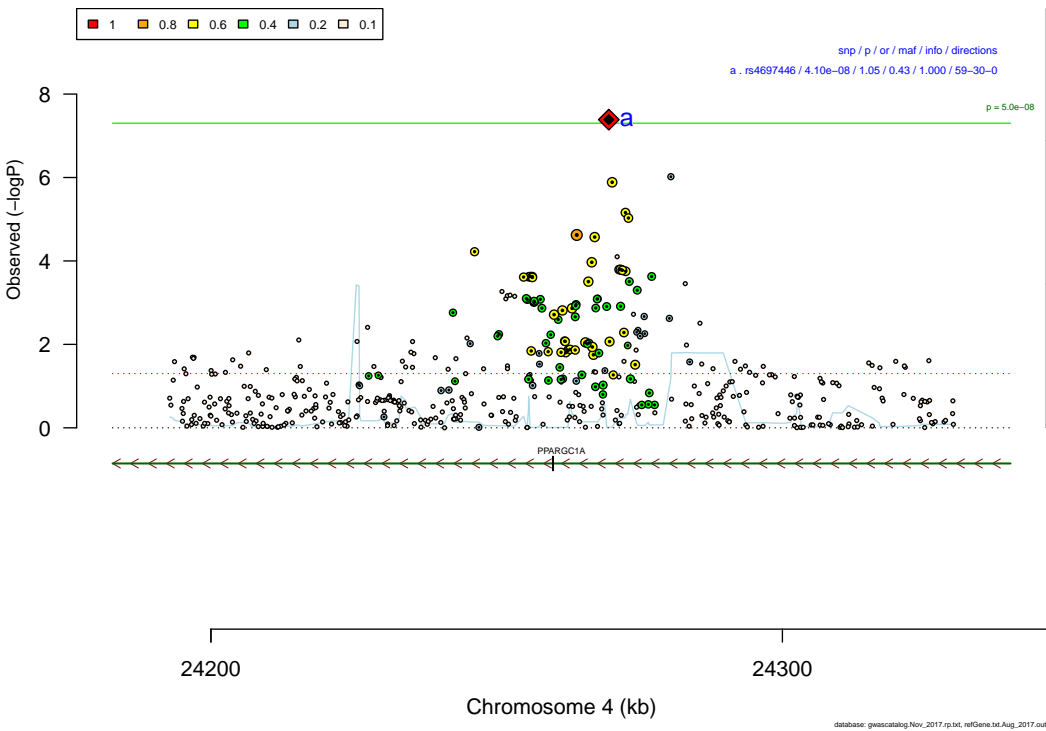

SCZ\_cond-rs4697446-chr4

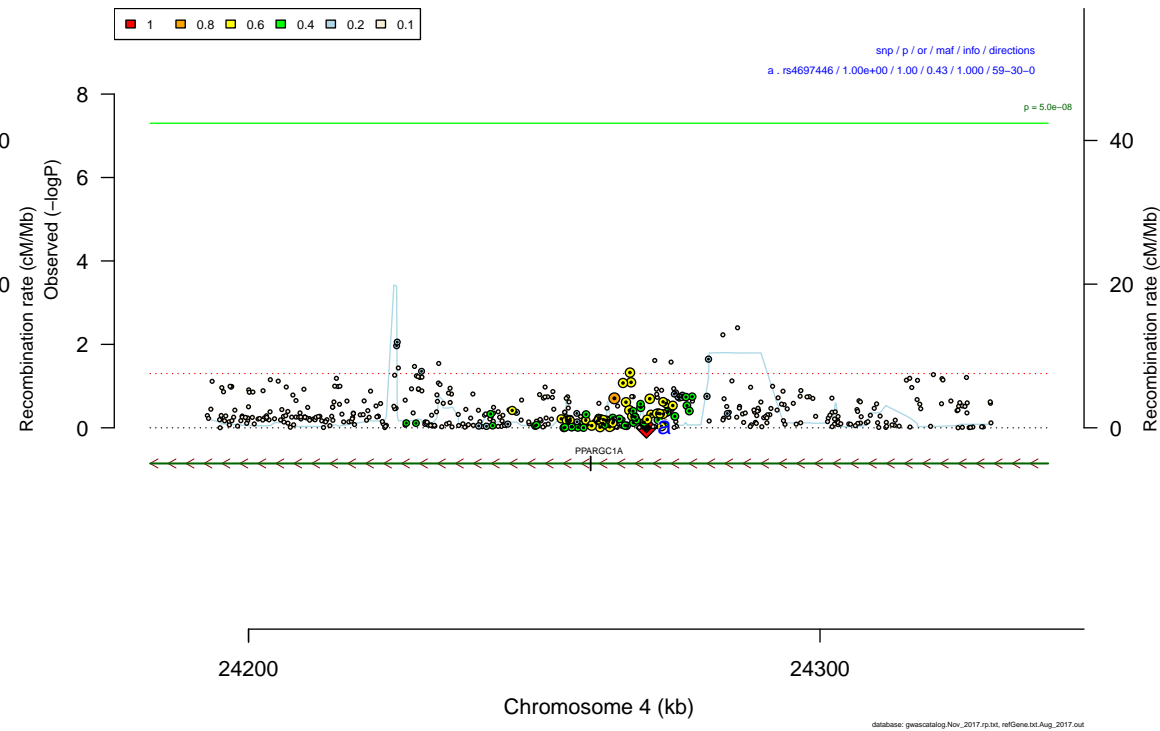

SCZ\_uncond-rs11897811-chr2

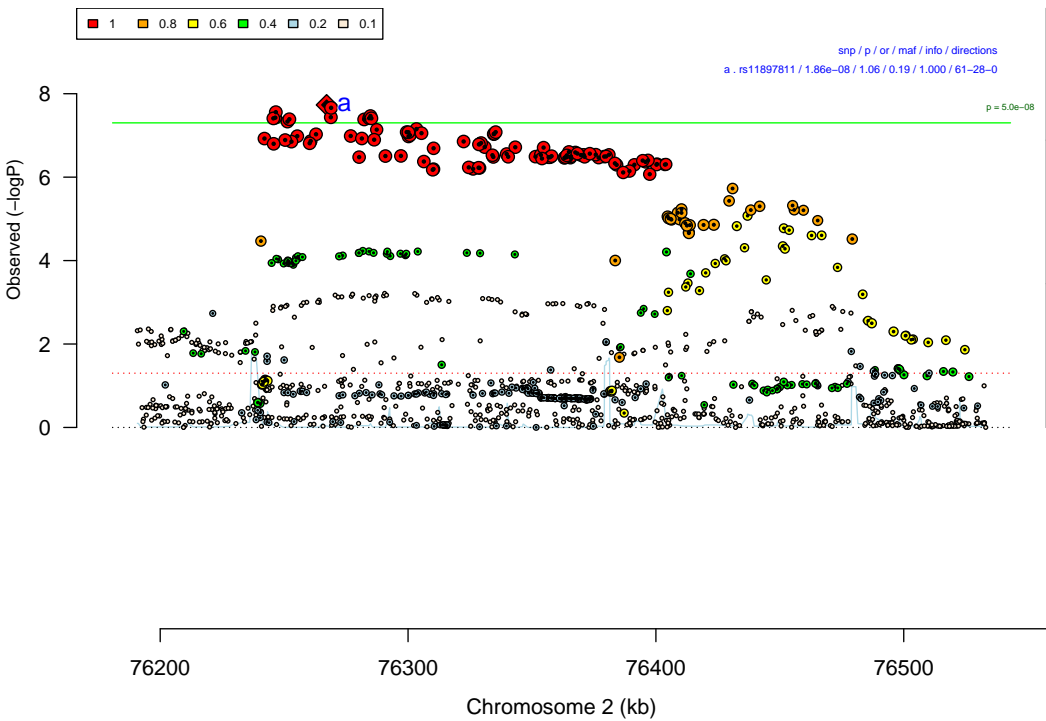

SCZ\_cond-rs11897811-chr2

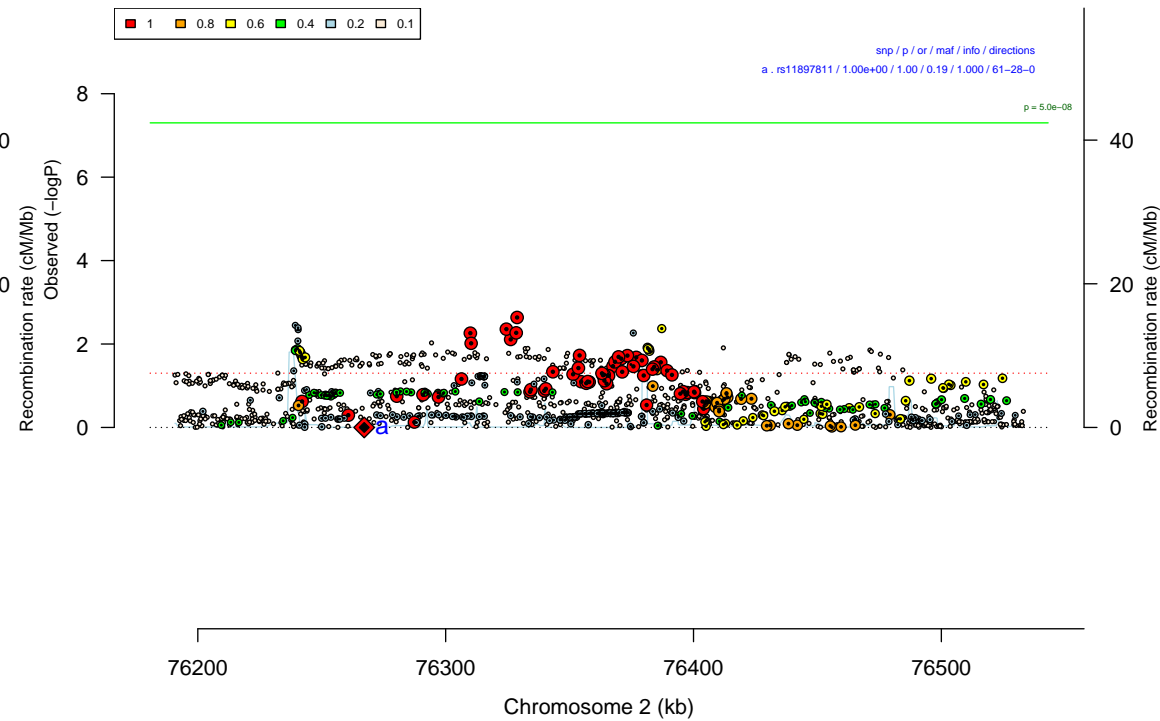

SCZ\_uncond-rs35792732-chr7

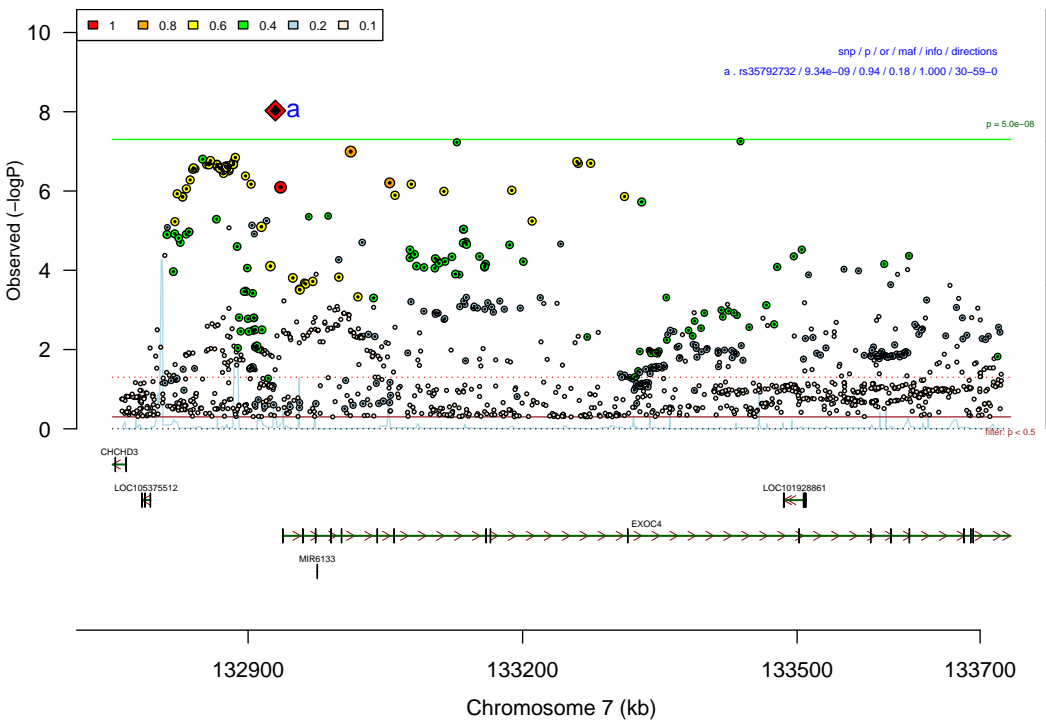

SCZ\_cond-rs35792732-chr7

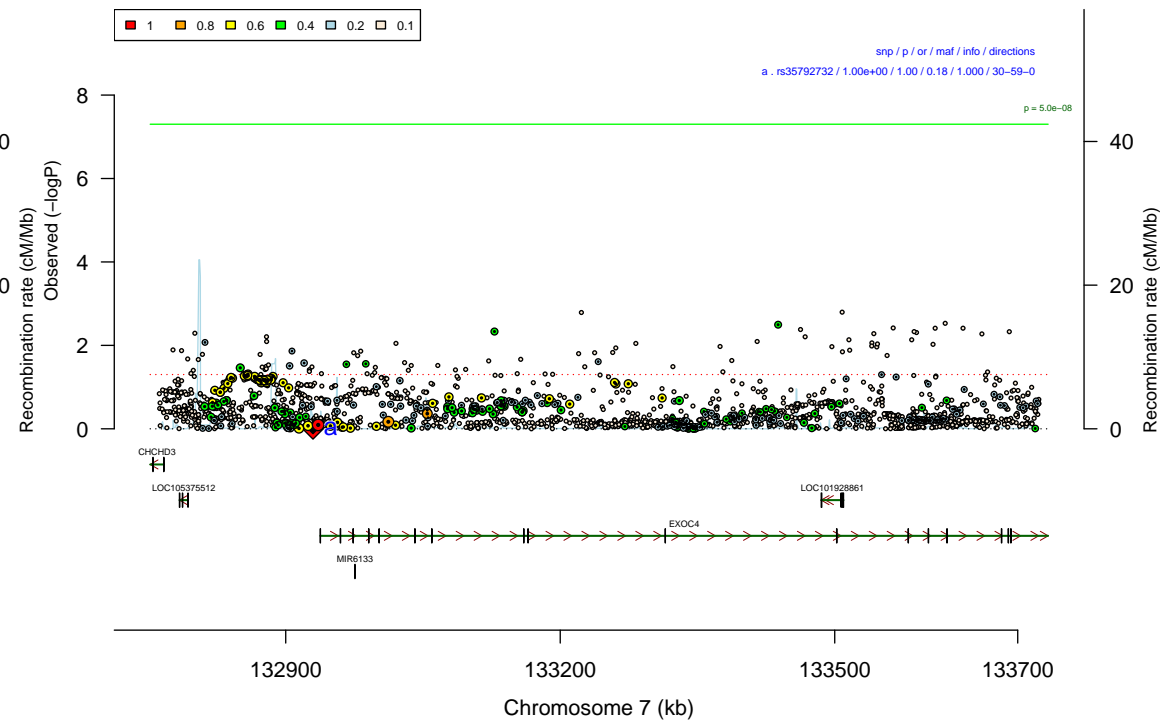

SCZ\_uncond-rs331395-chr5

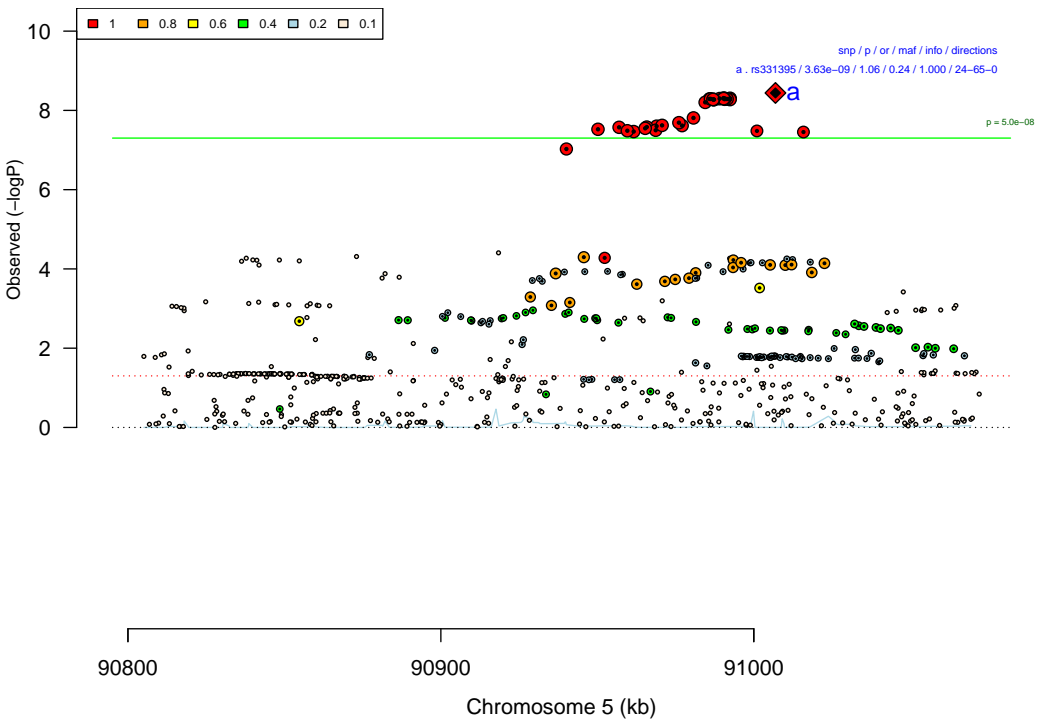

SCZ\_cond-rs331395-chr5

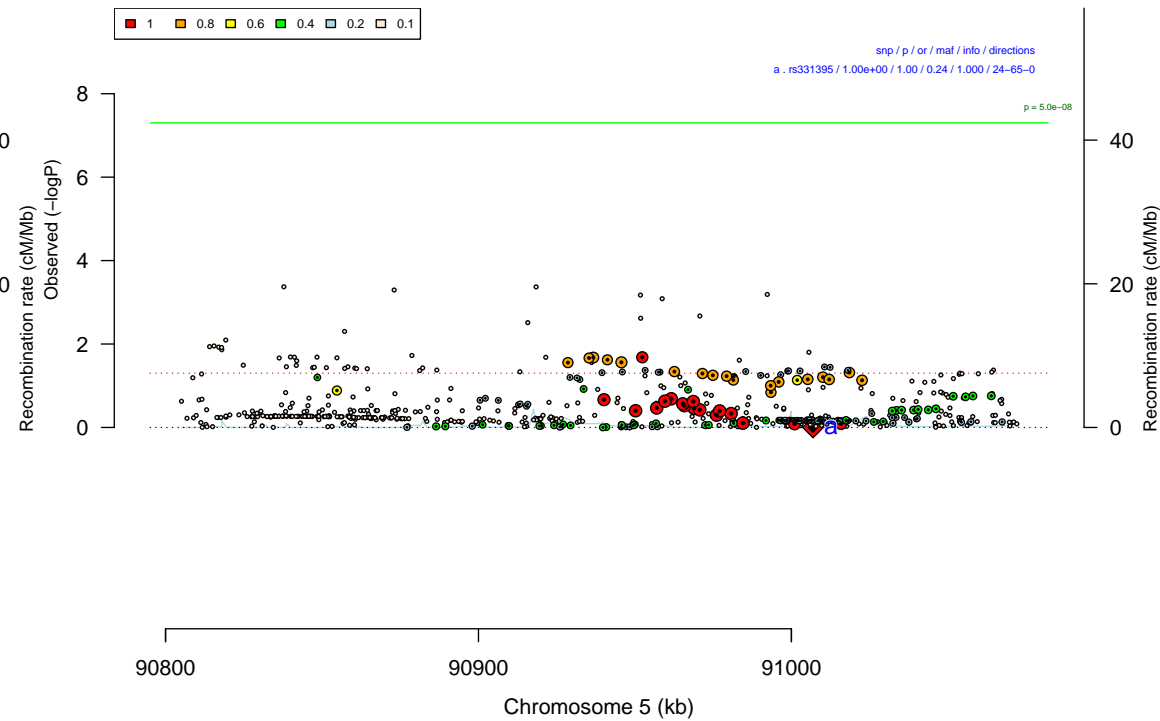

SCZ\_uncond-rs2224086-chr1

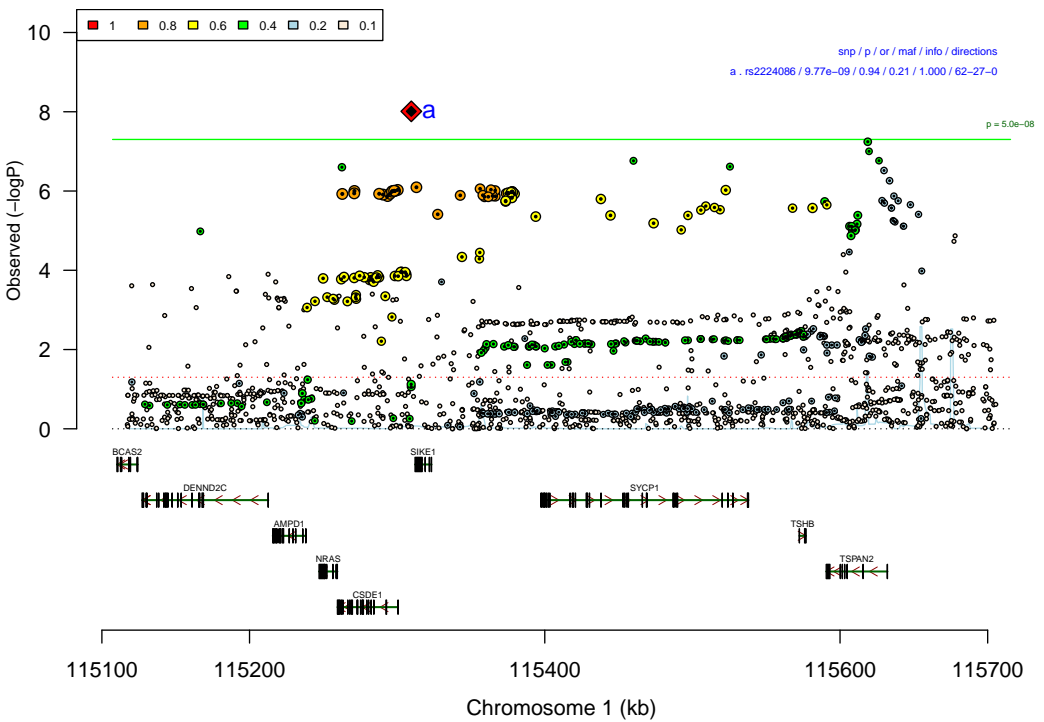

SCZ\_cond-rs2224086-chr1

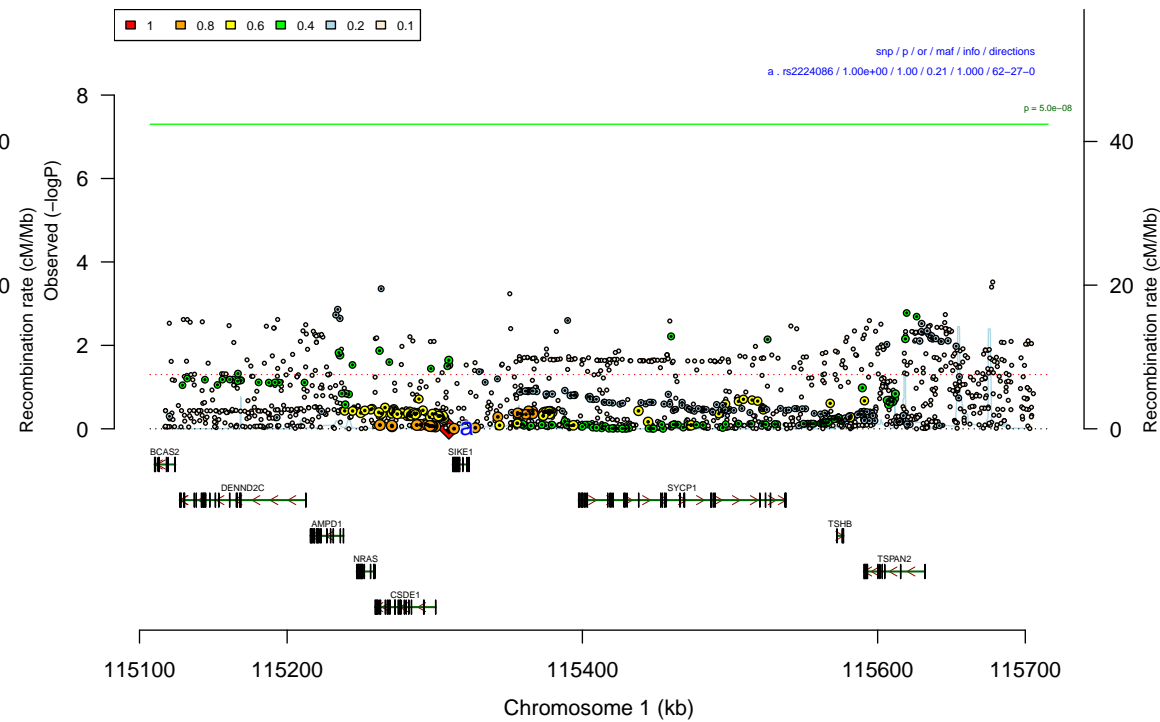

SCZ\_uncond-rs459391-chr21

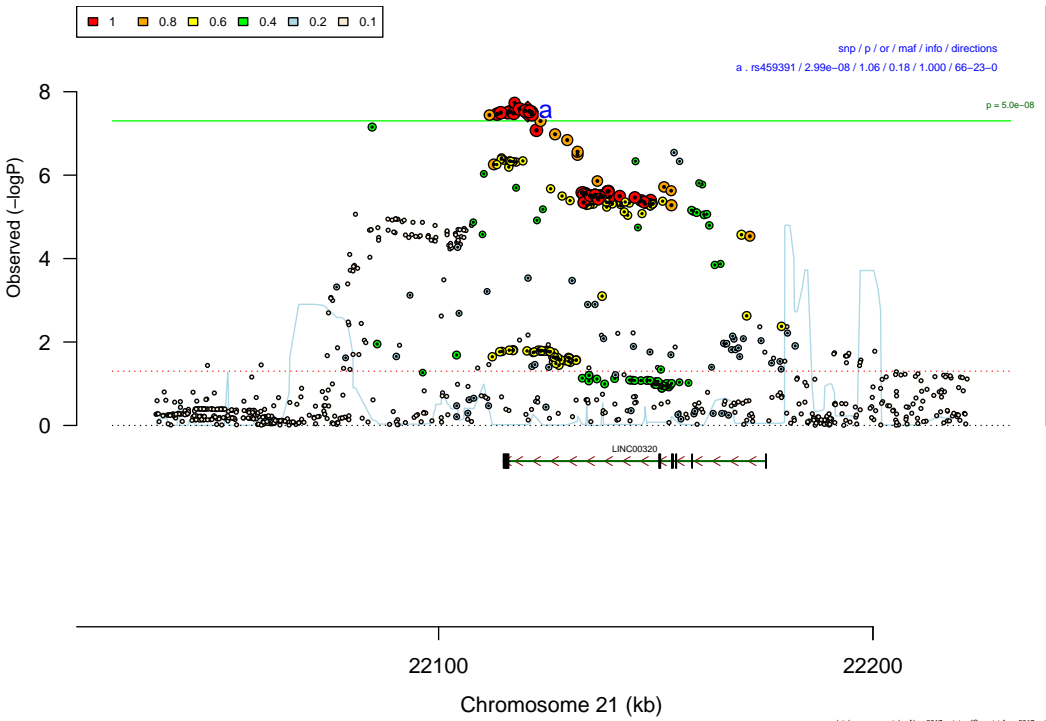

SCZ\_cond-rs459391-chr21

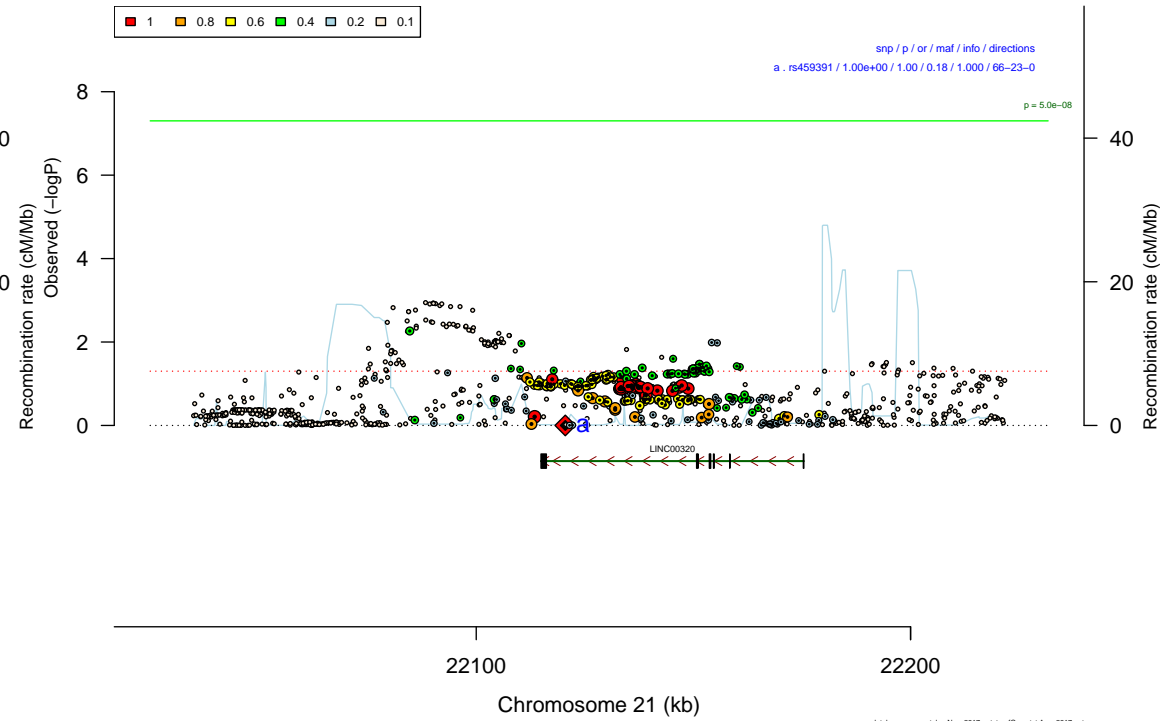

SCZ\_uncond-rs215483-chr4

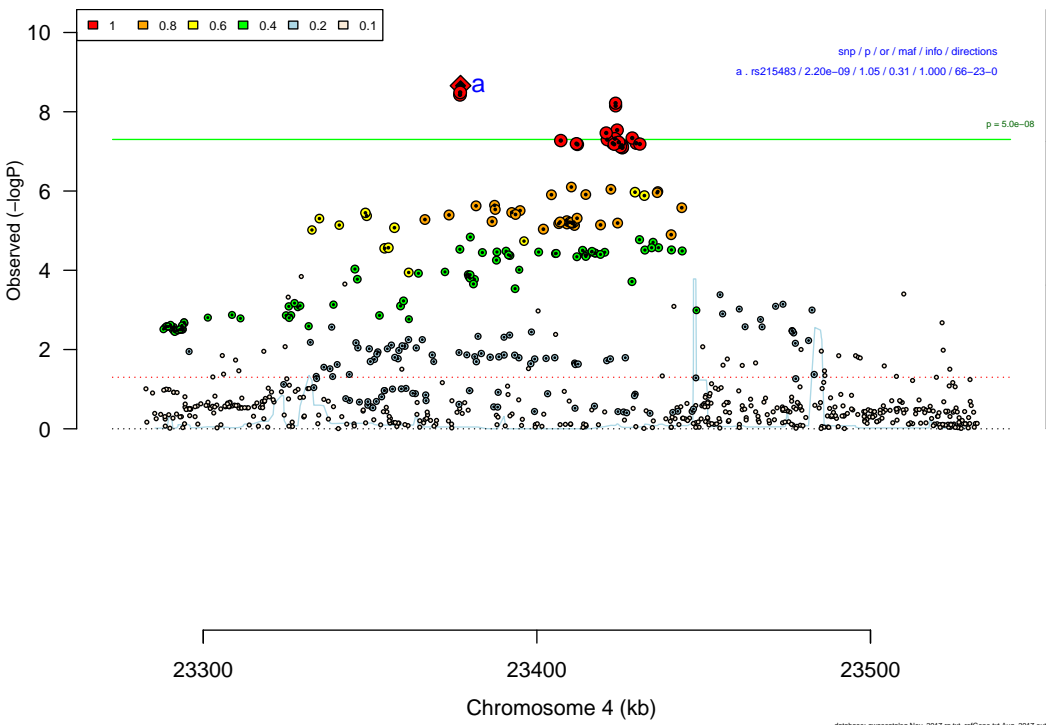

SCZ\_cond-rs215483-chr4

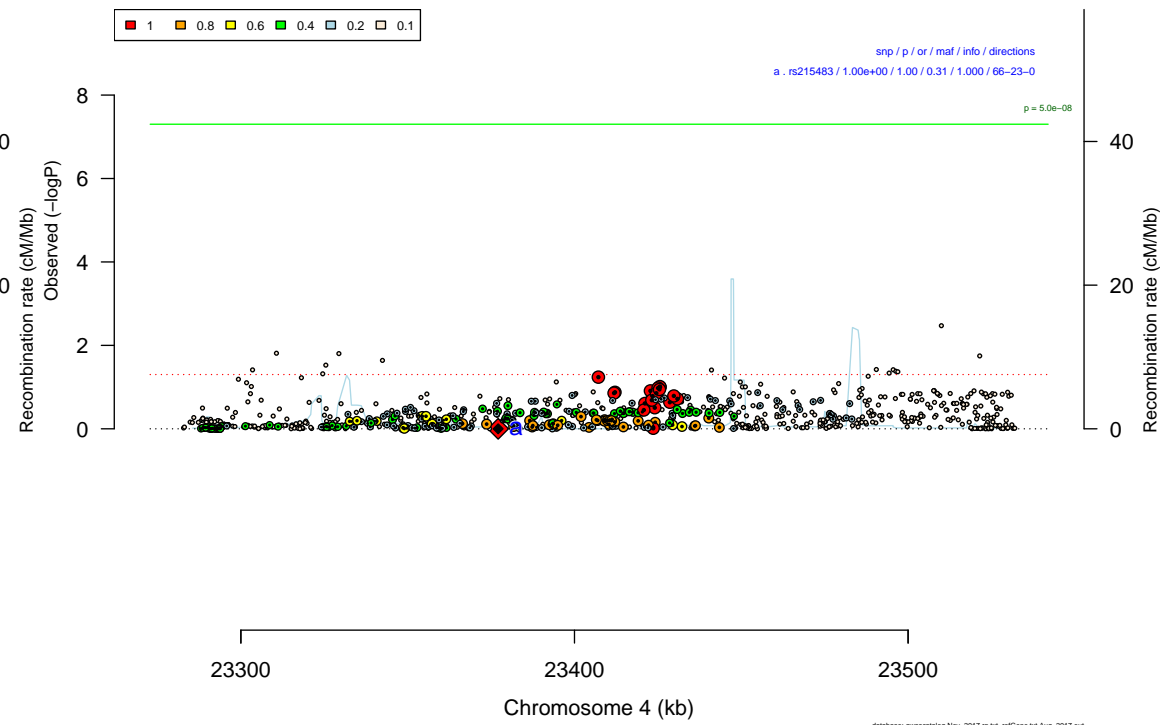

SCZ\_uncond-rs9687282-chr5

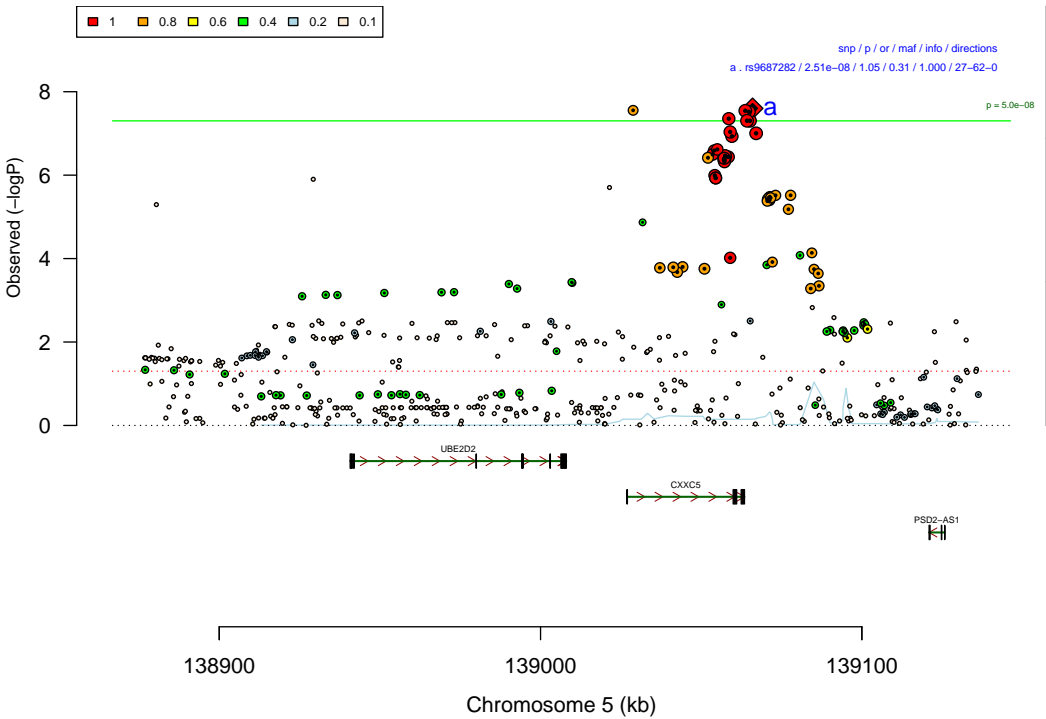

SCZ\_cond-rs9687282-chr5

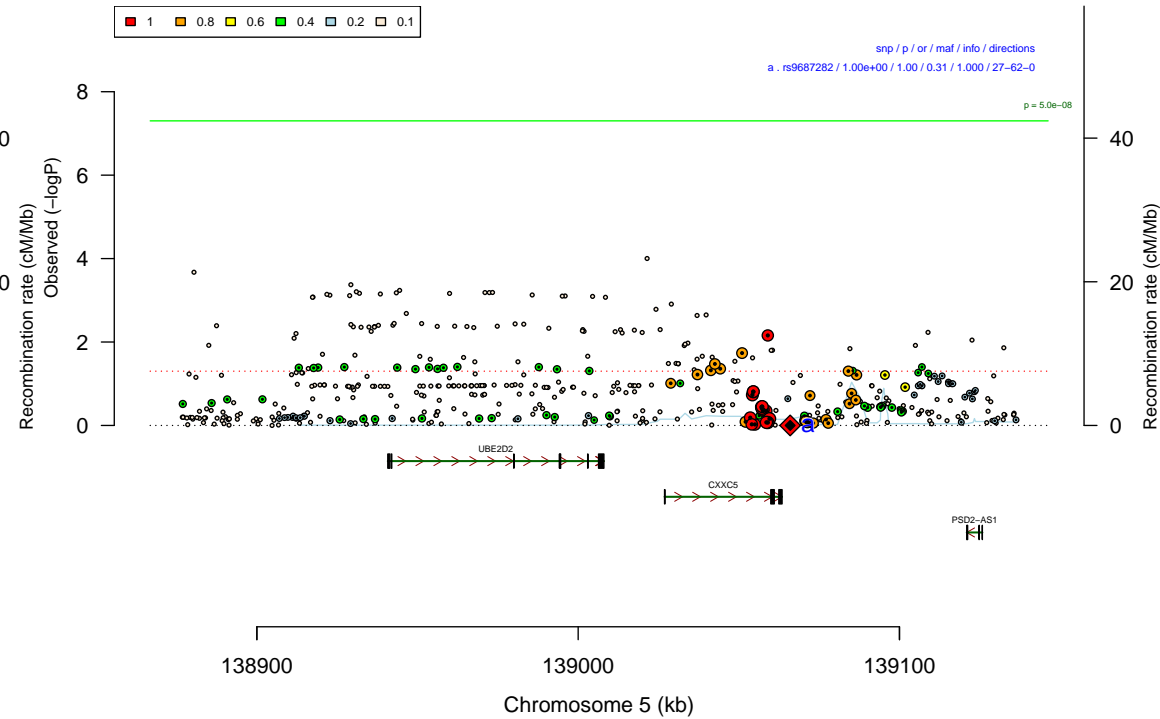

SCZ\_uncond-rs11122119-chr1

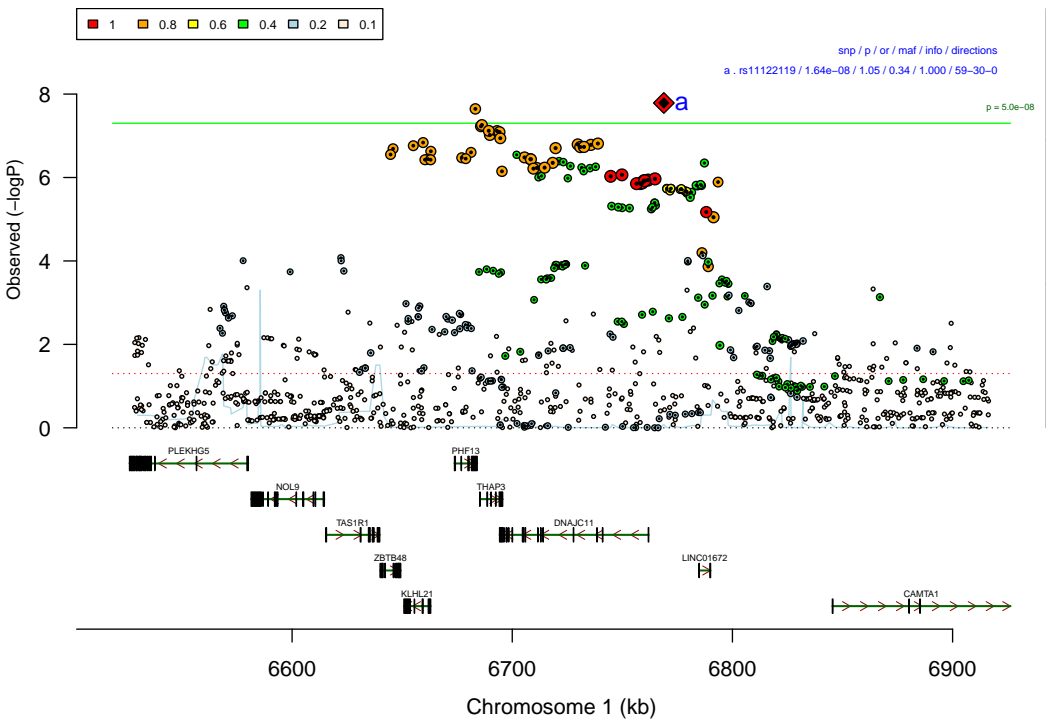

SCZ\_cond-rs11122119-chr1

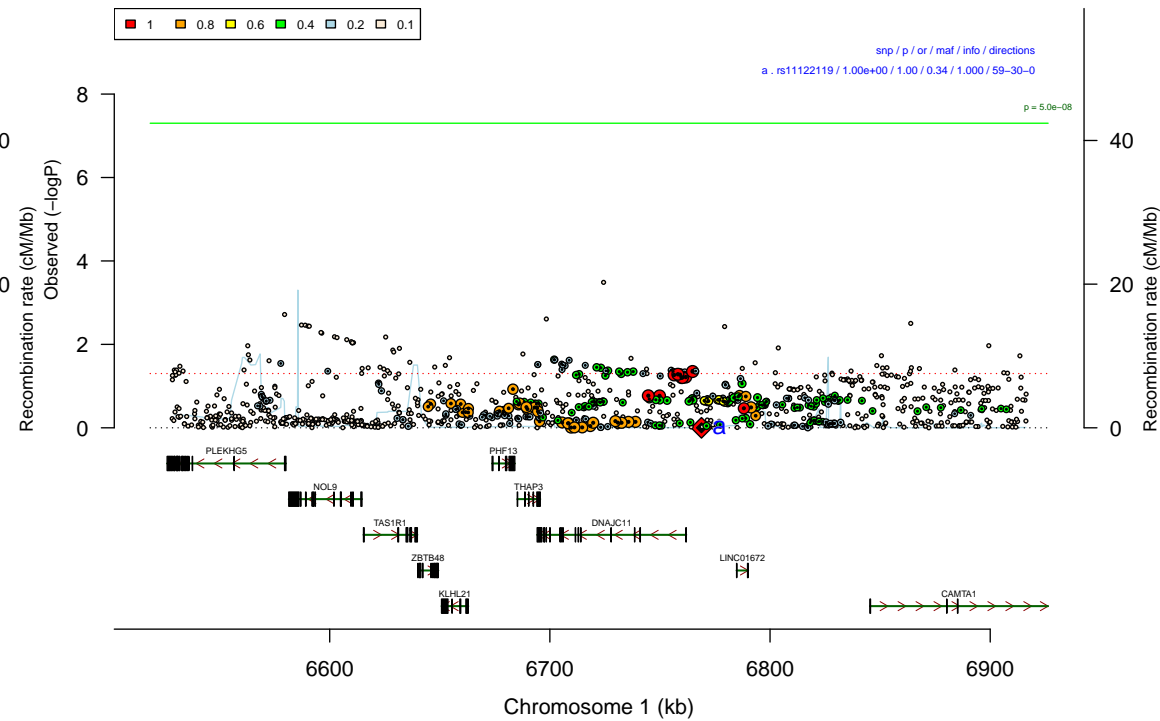

SCZ\_uncond-rs77463171-chr16

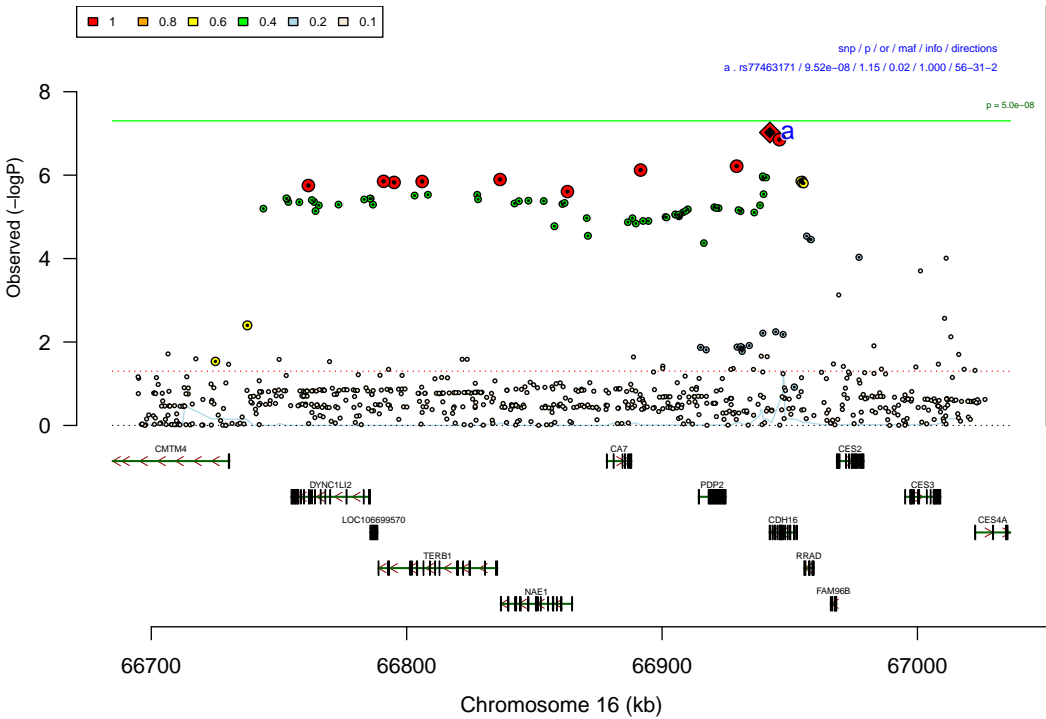

SCZ\_cond-rs77463171-chr16

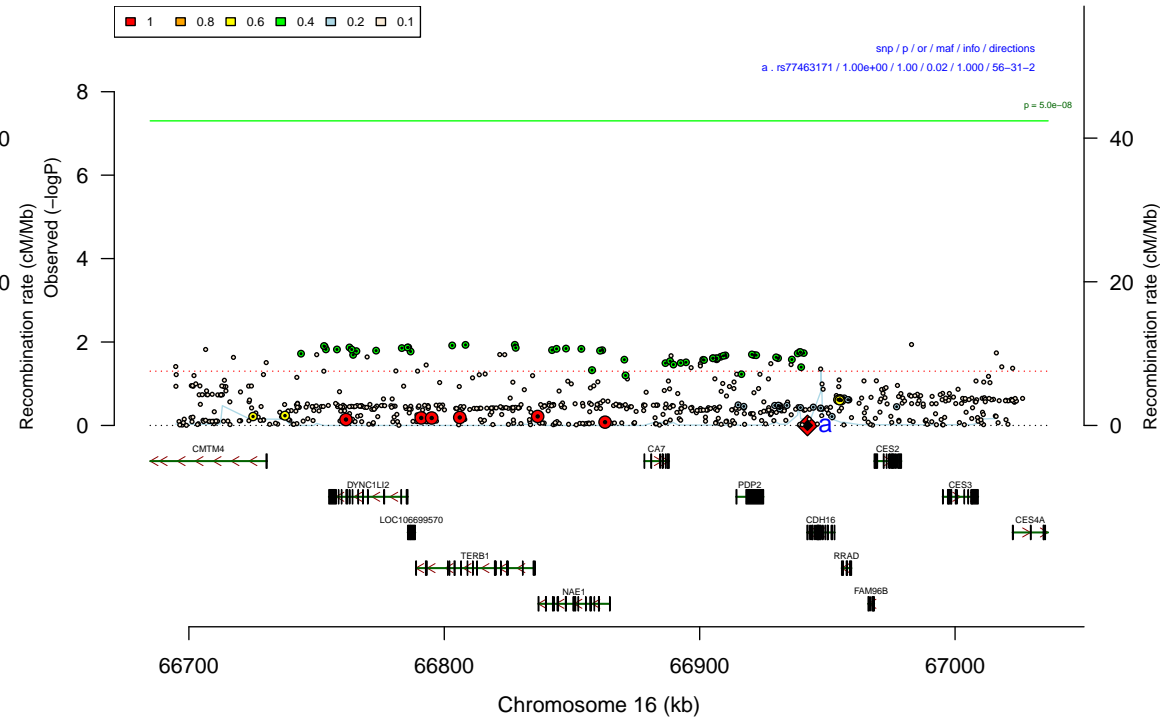

SCZ\_uncond-rs1348129-chr1

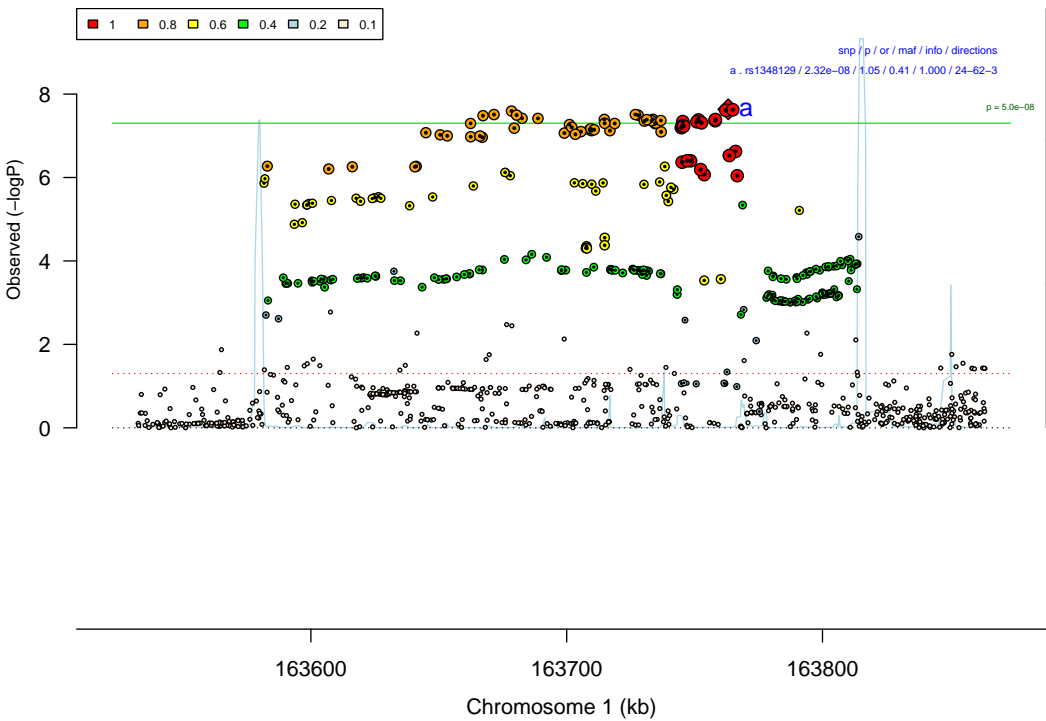

SCZ\_cond-rs1348129-chr1

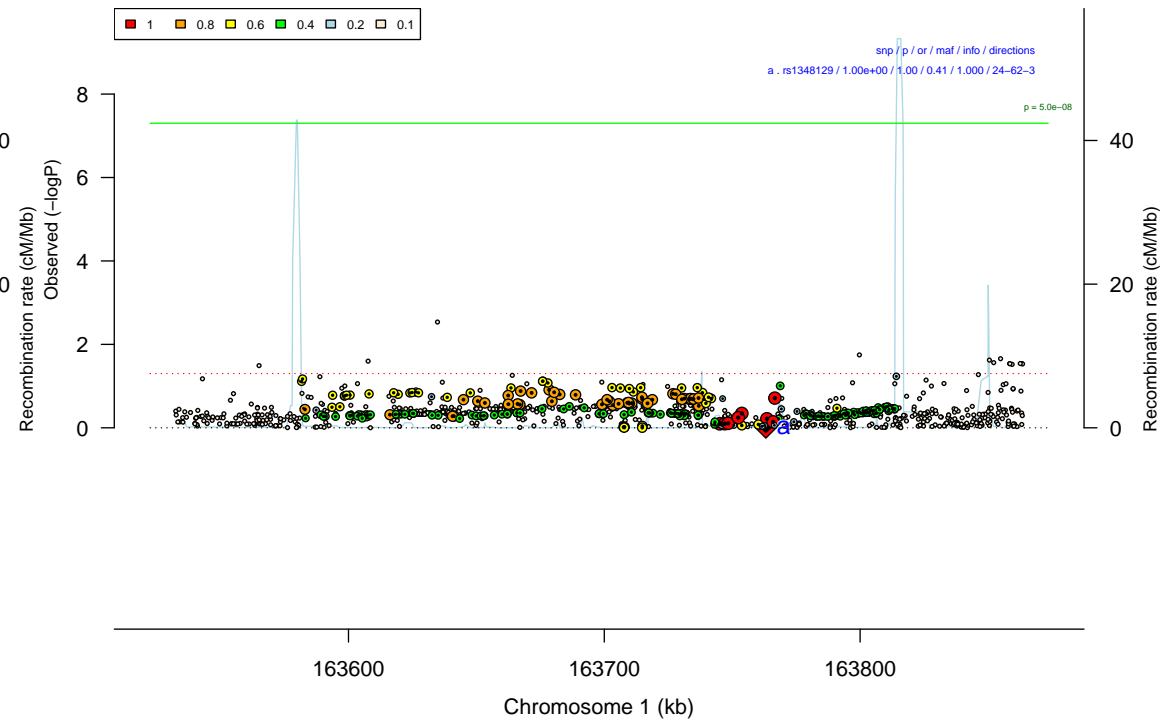

SCZ\_uncond-rs9287971-chr2

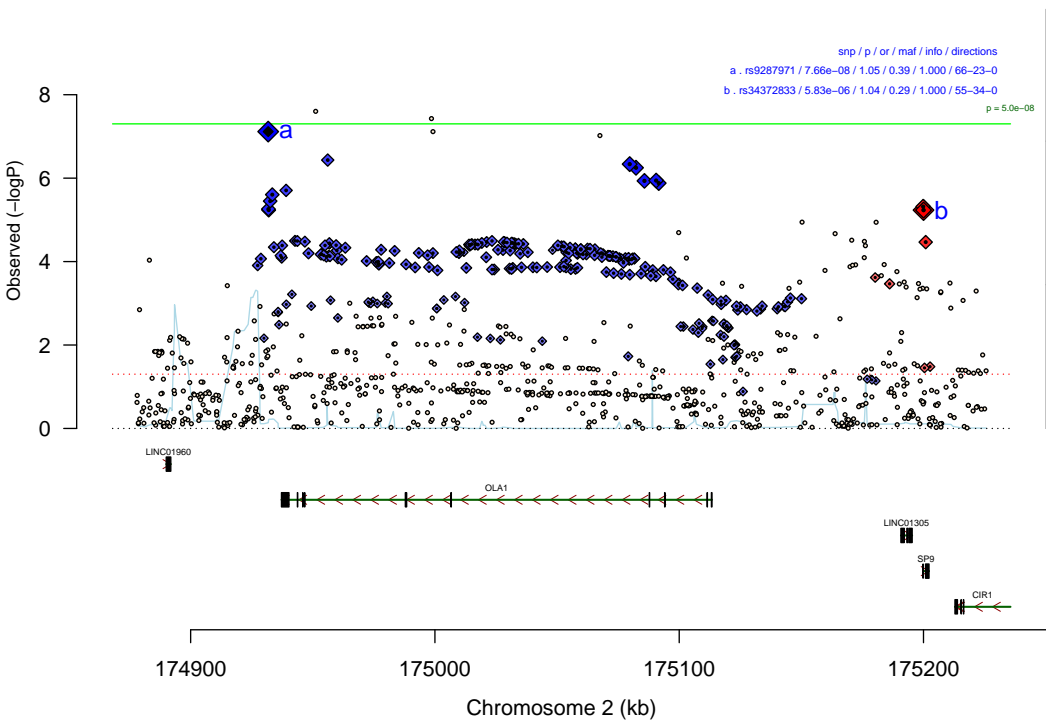

SCZ\_rs9287971-chr2

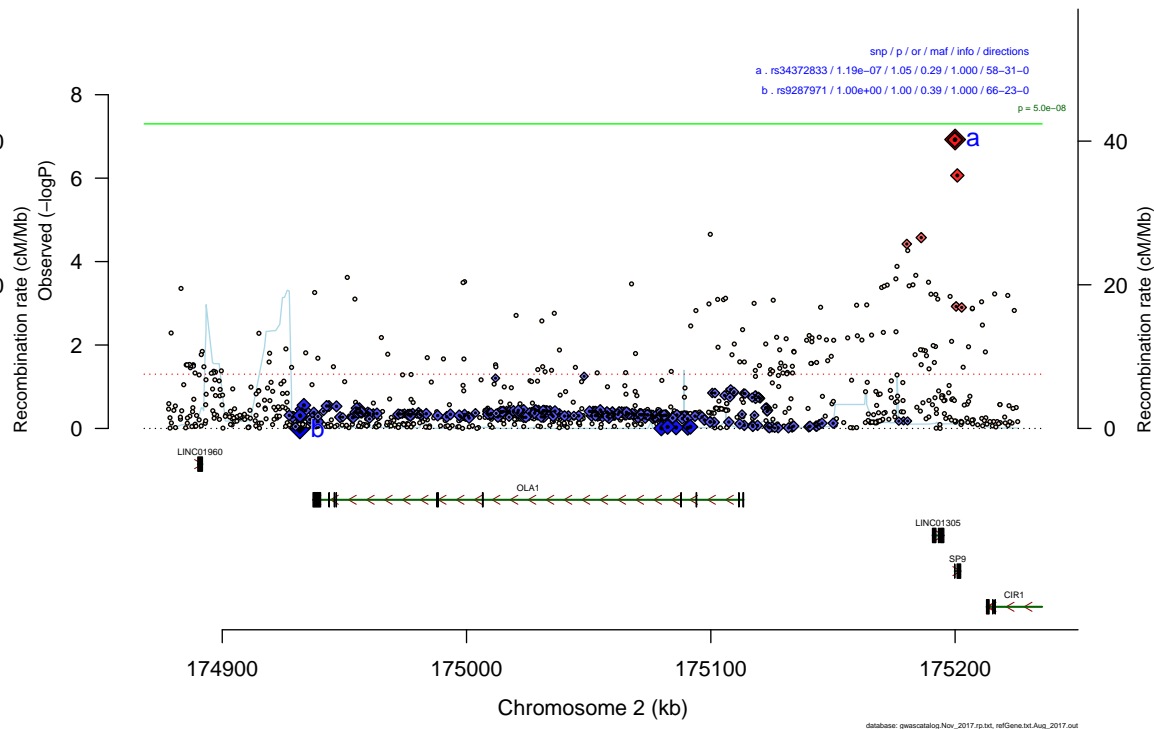

SCZ\_cond\_rs9287971-rs34372833-chr2

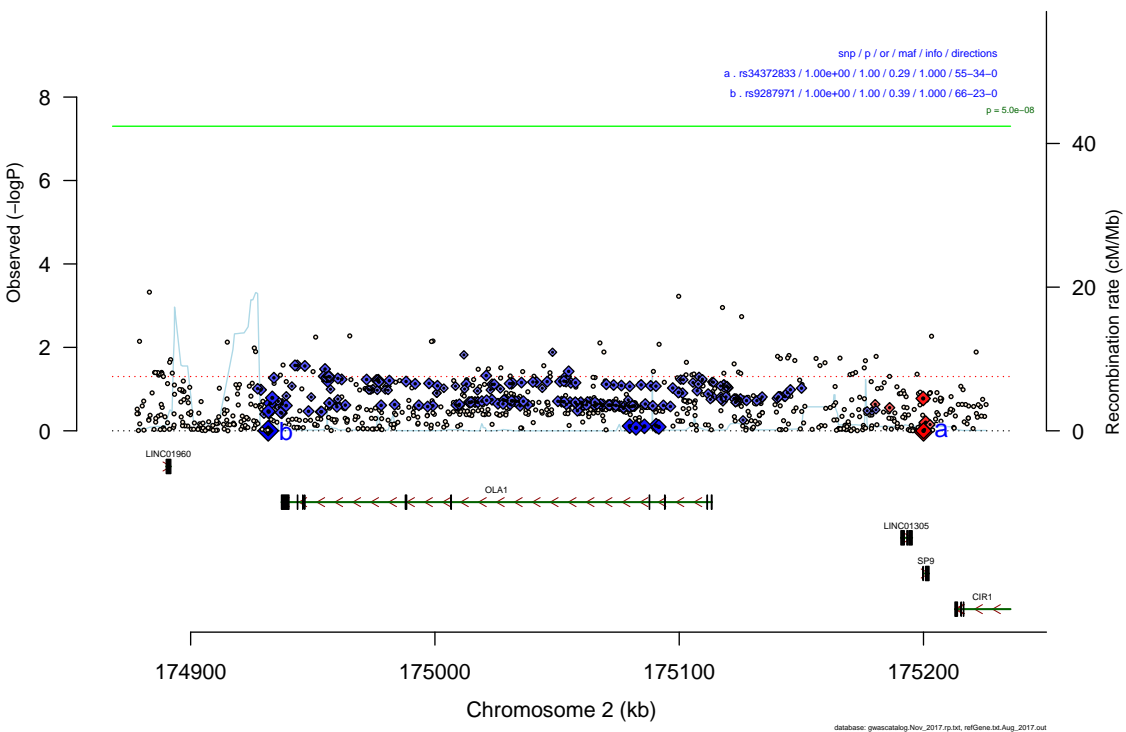

SCZ\_uncond-rs10238960-chr7

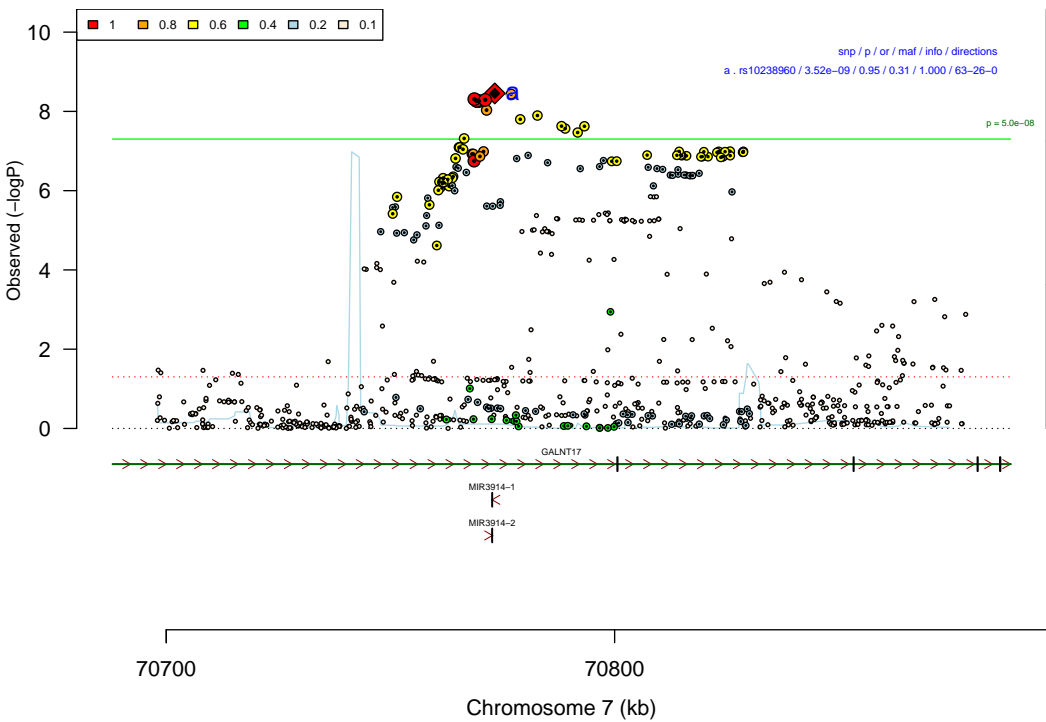

SCZ\_cond-rs10238960-chr7

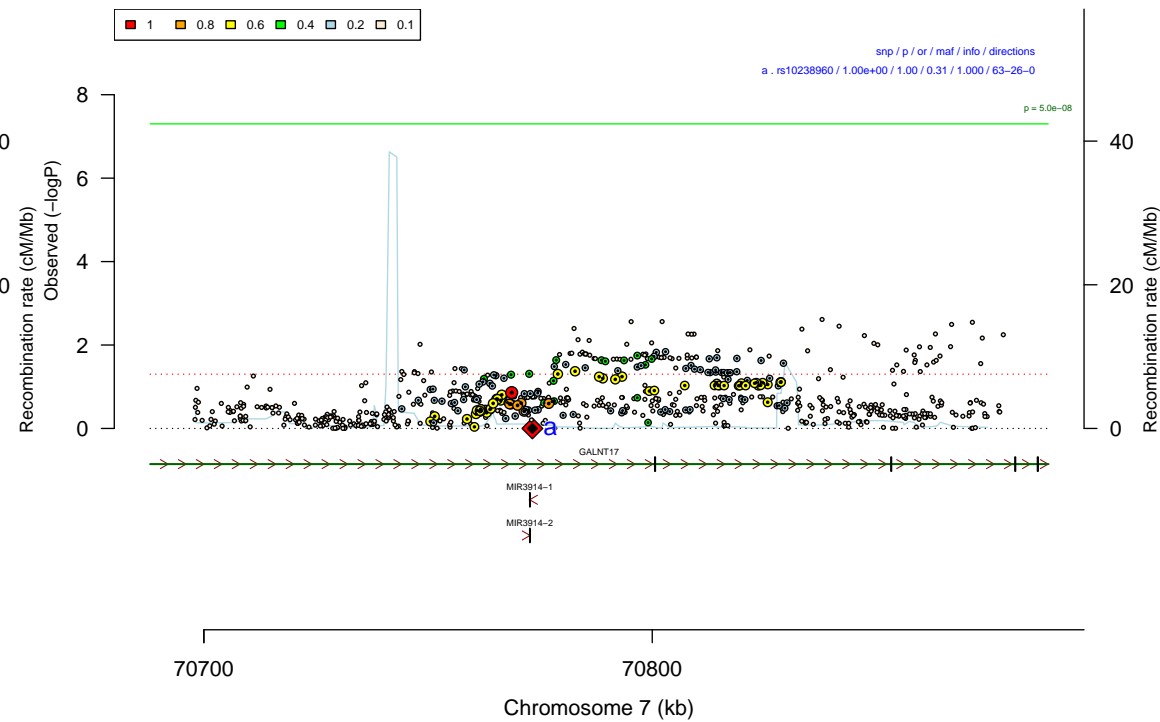

SCZ\_uncond-rs6919146-chr6

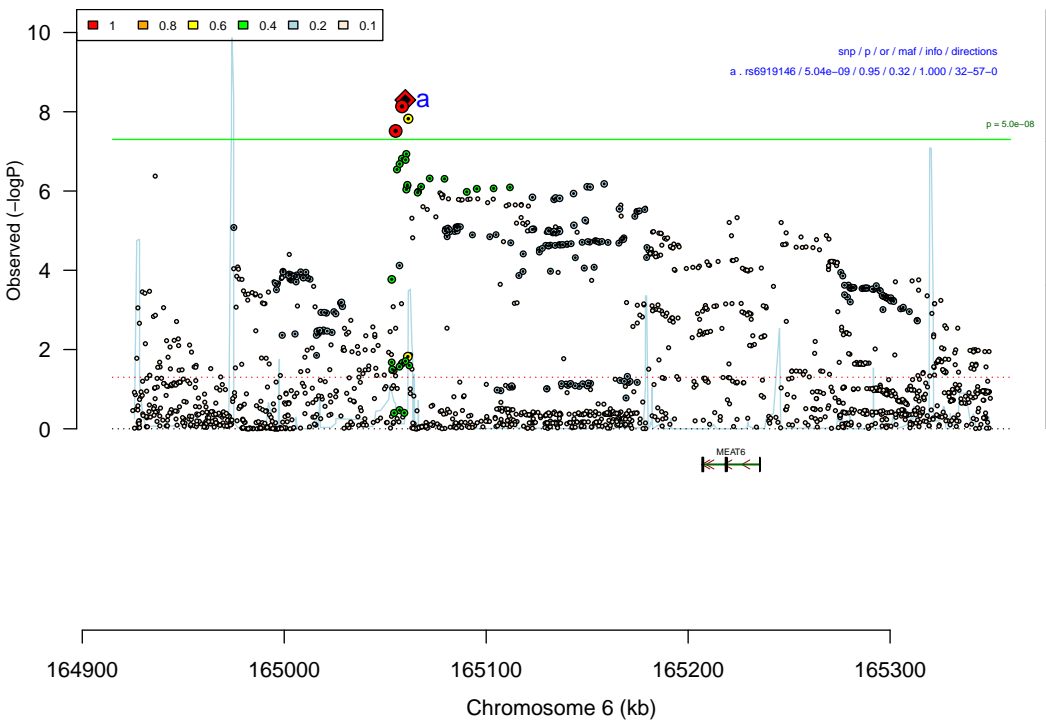

SCZ\_cond-rs6919146-chr6

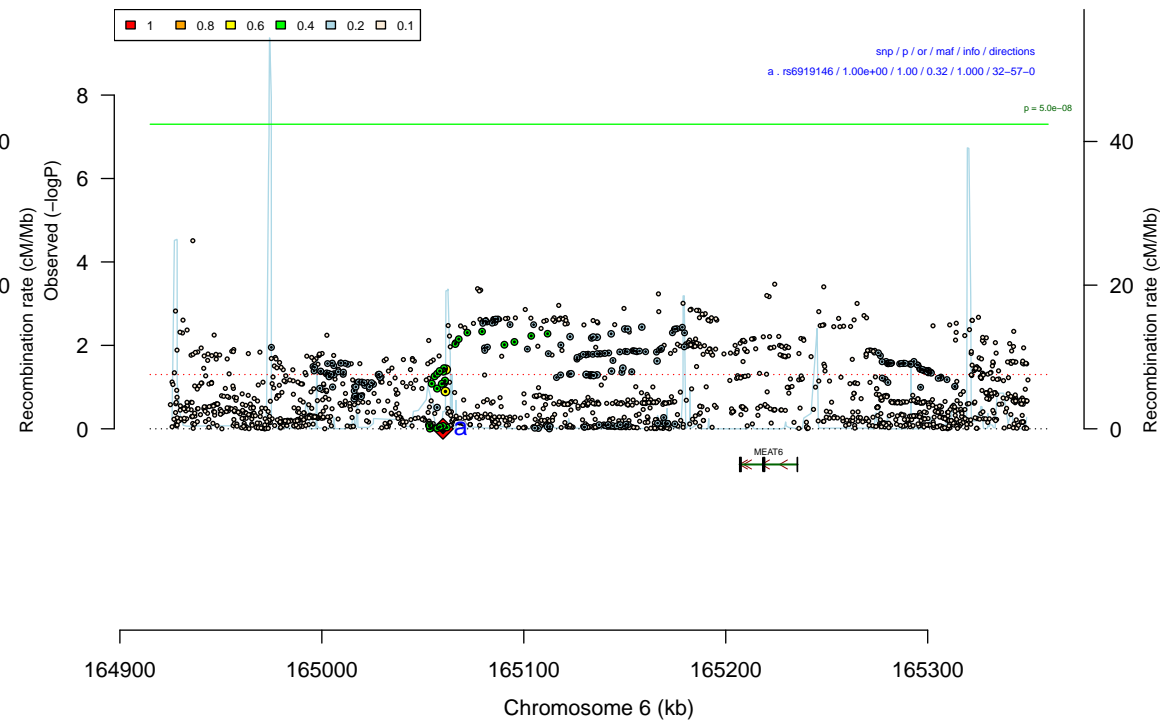



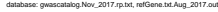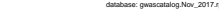

SCZ\_uncond-rs10894308-chr11

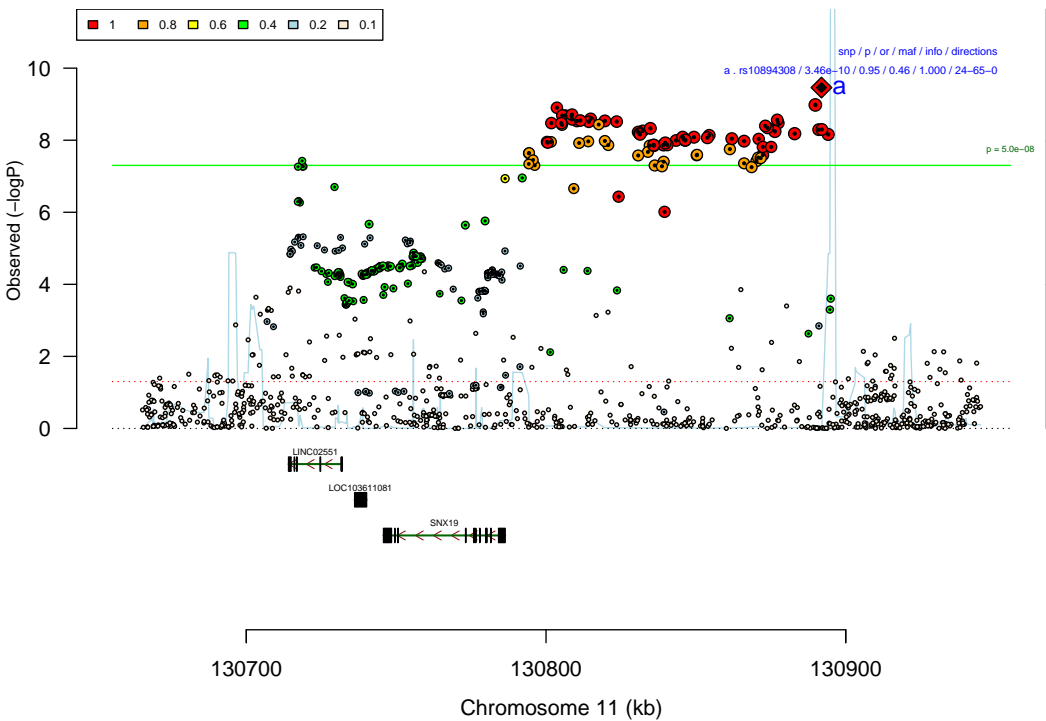

SCZ\_cond-rs10894308-chr11

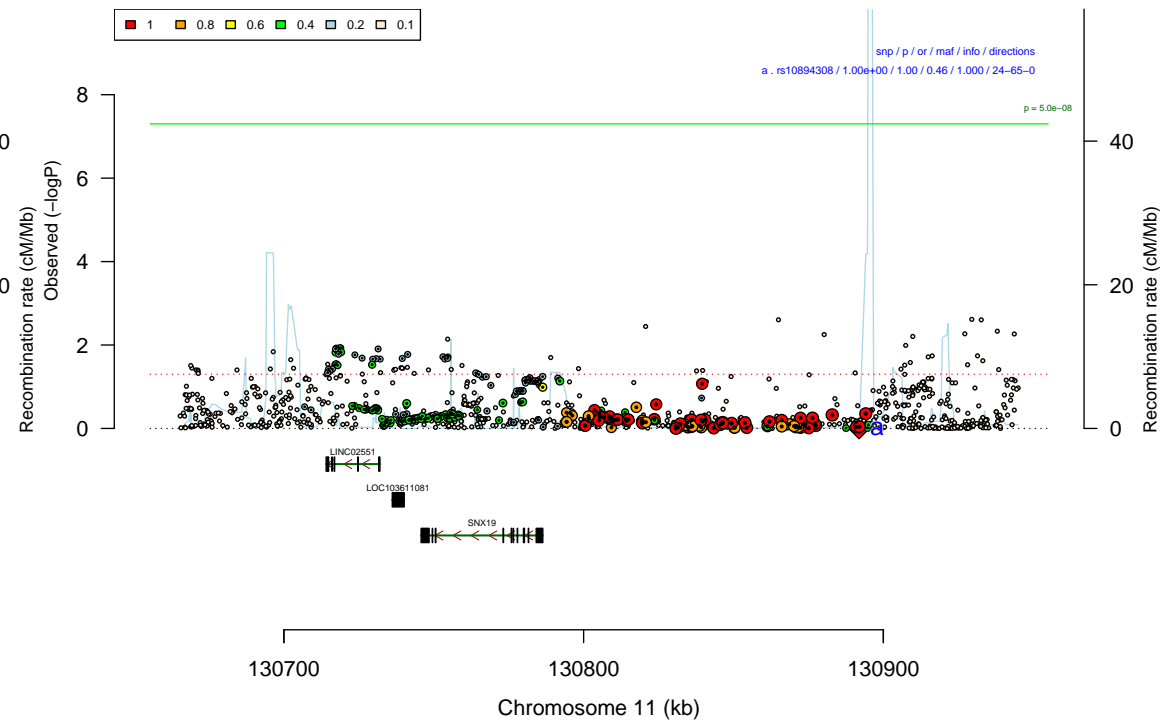

SCZ\_uncond-rs1881046-chr2

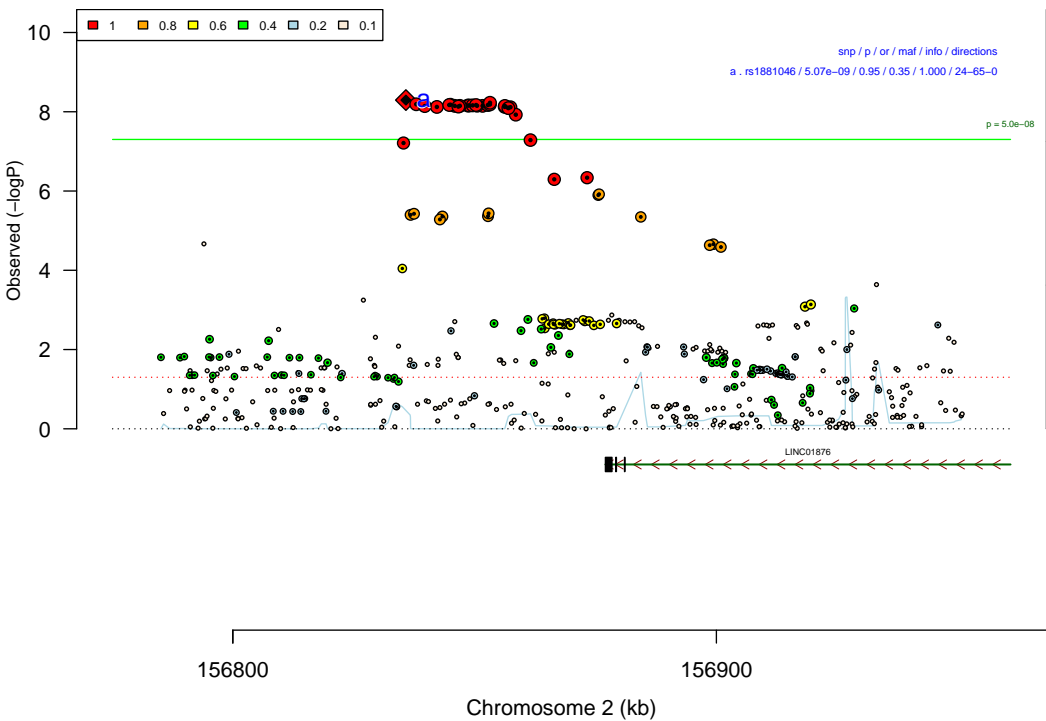

SCZ\_cond-rs1881046-chr2

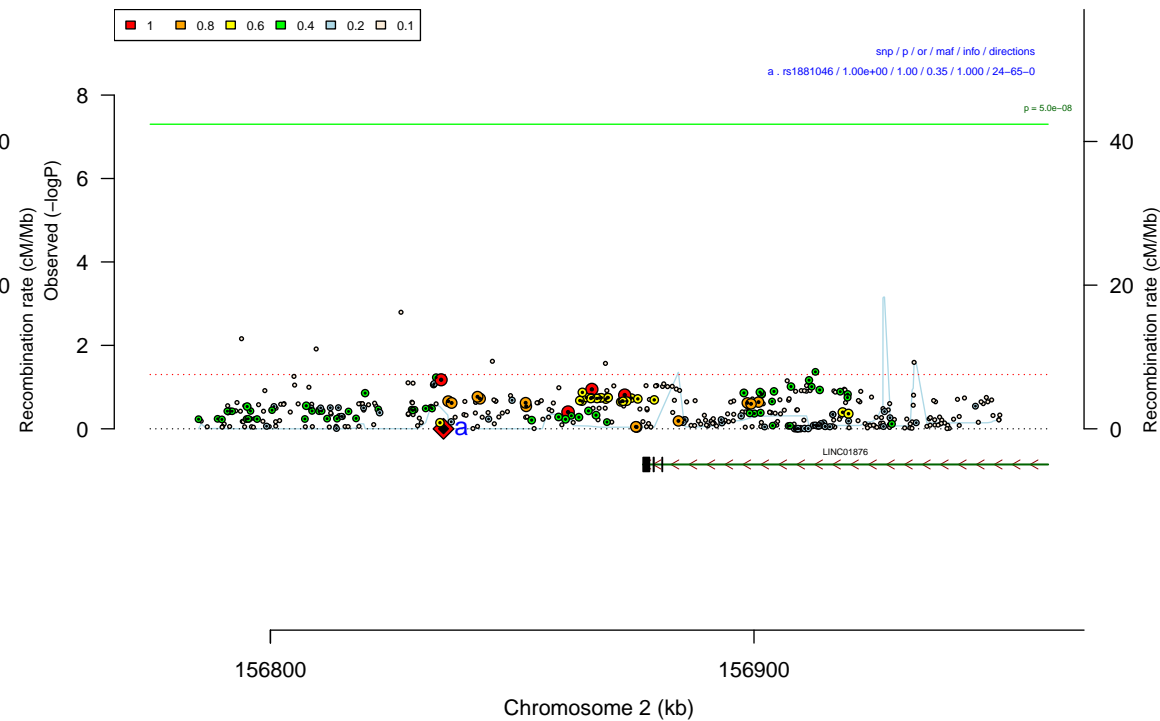

SCZ\_uncond-rs7900775-chr10

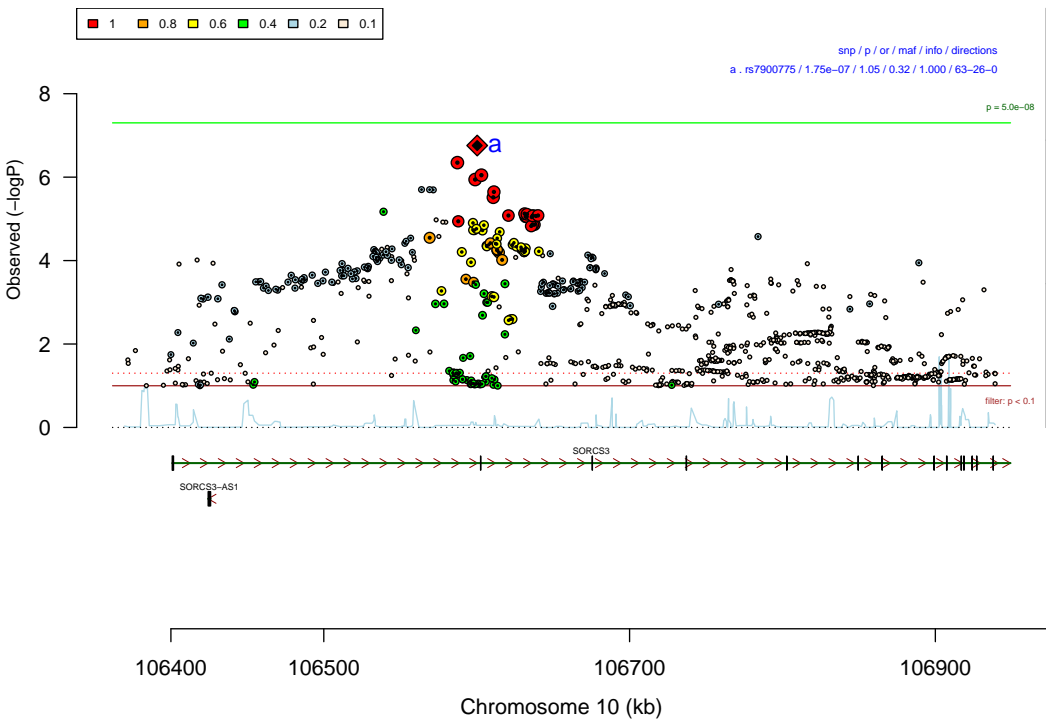

SCZ\_cond-rs7900775-chr10

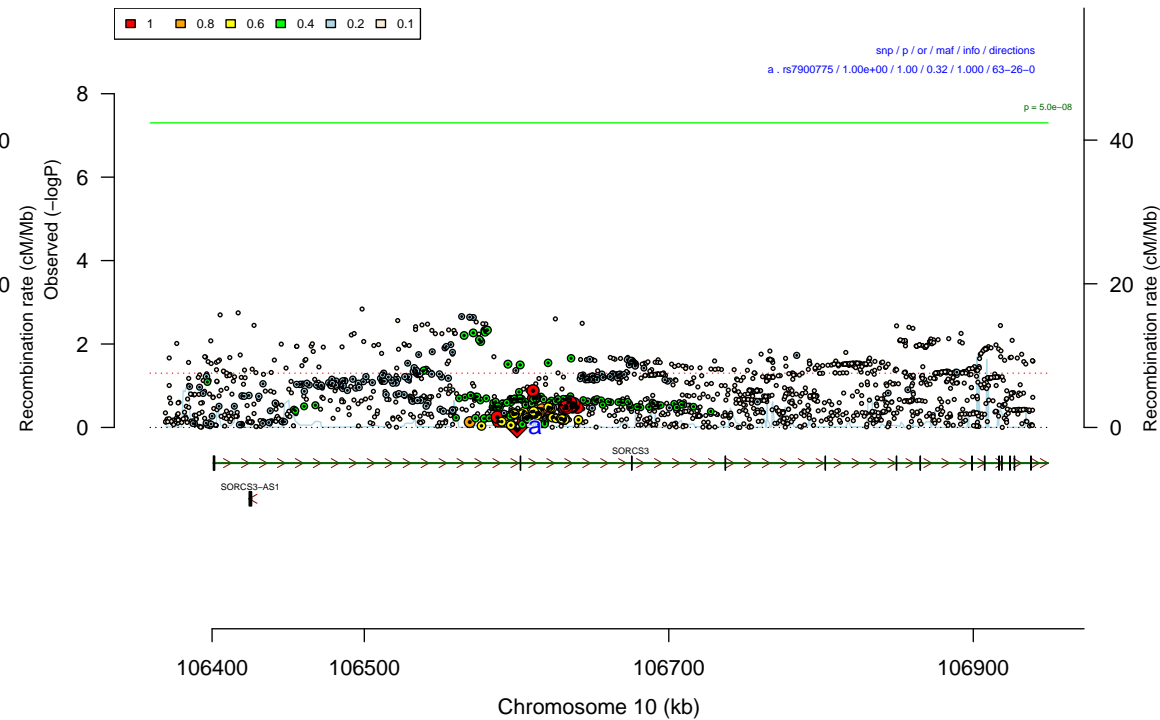

SCZ\_uncond-rs2119242-chr10

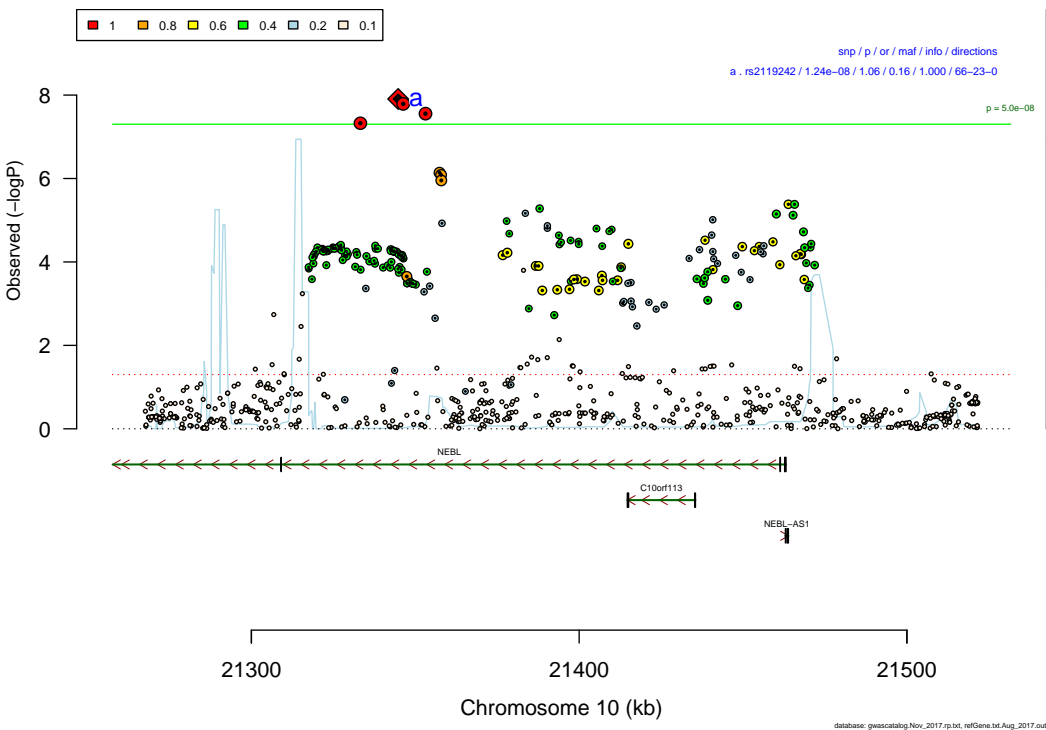

SCZ\_cond-rs2119242-chr10

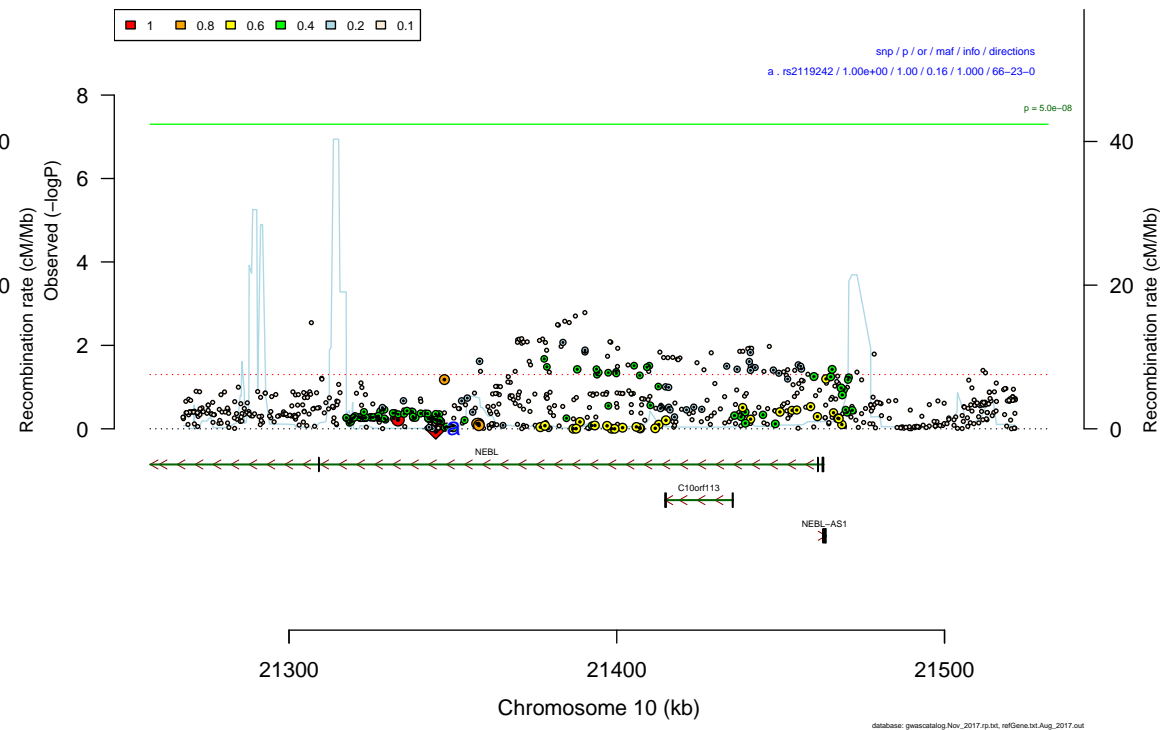

SCZ\_uncond-rs12474906-chr2

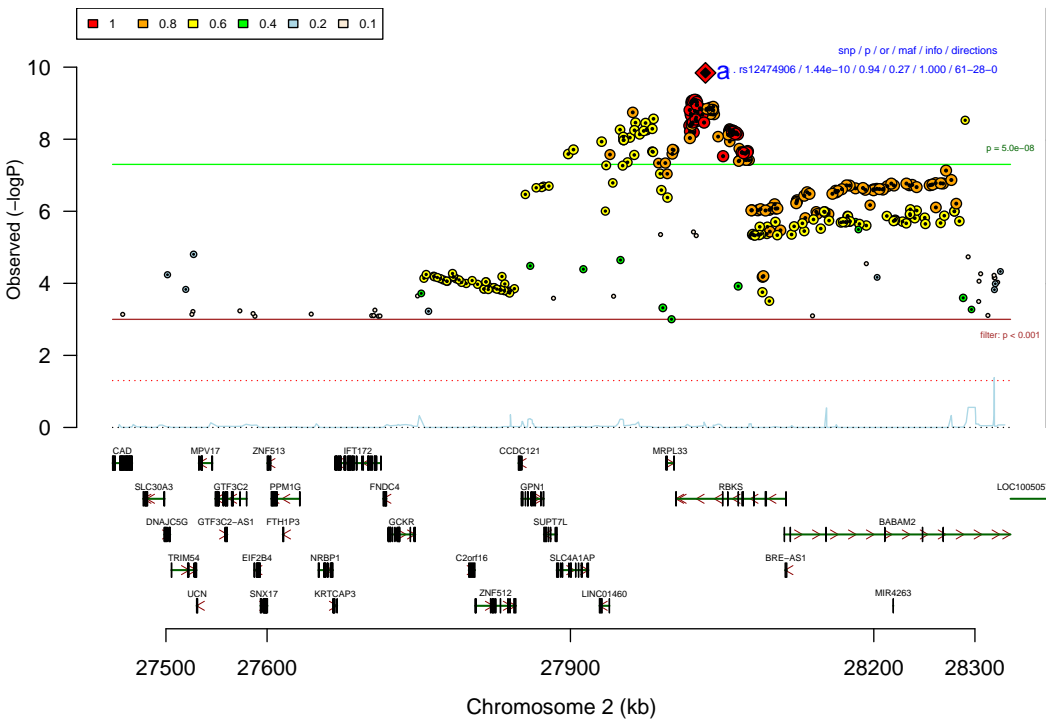

SCZ\_cond-rs12474906-chr2

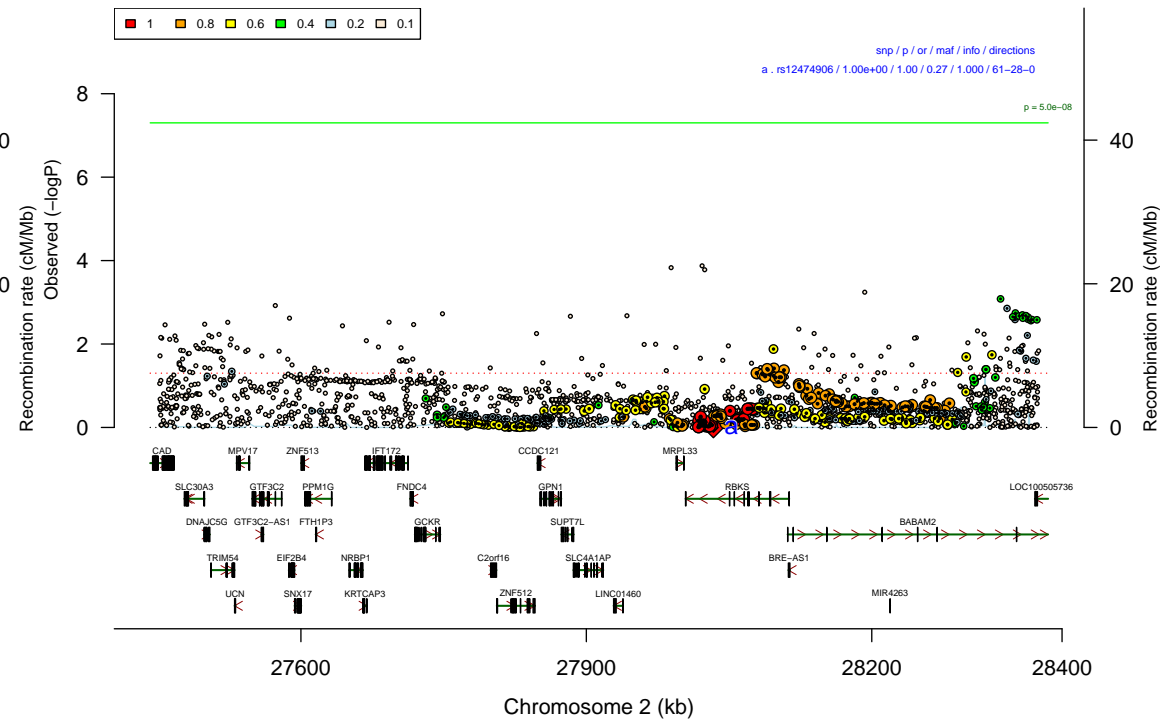

SCZ\_uncond-rs9341835-chr6

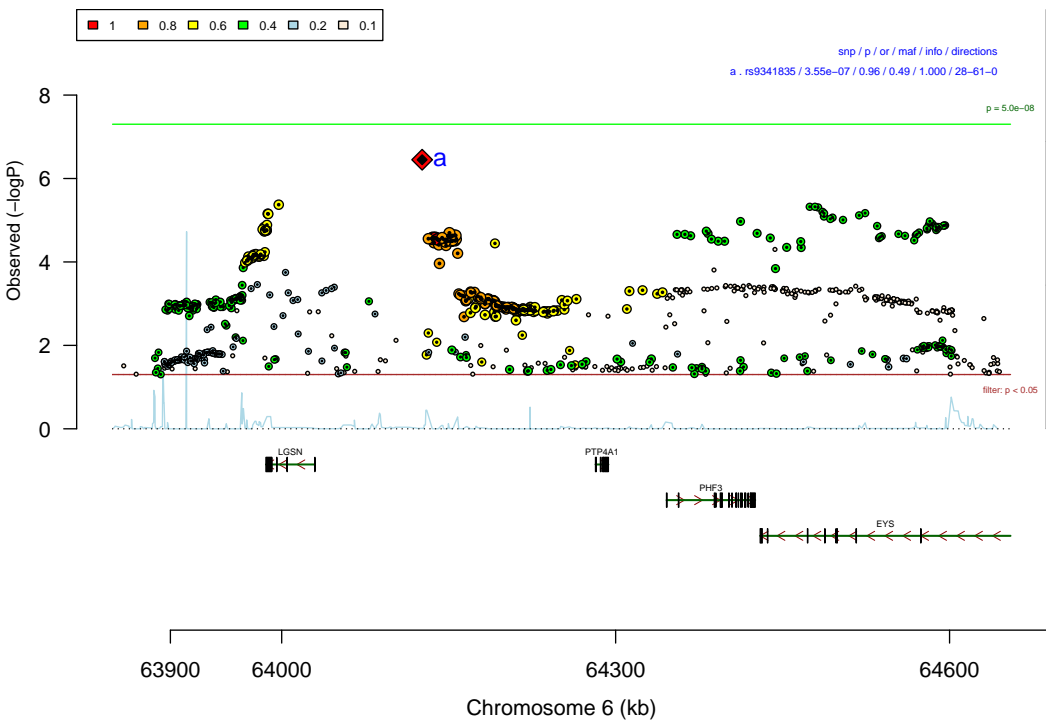

SCZ\_cond-rs9341835-chr6

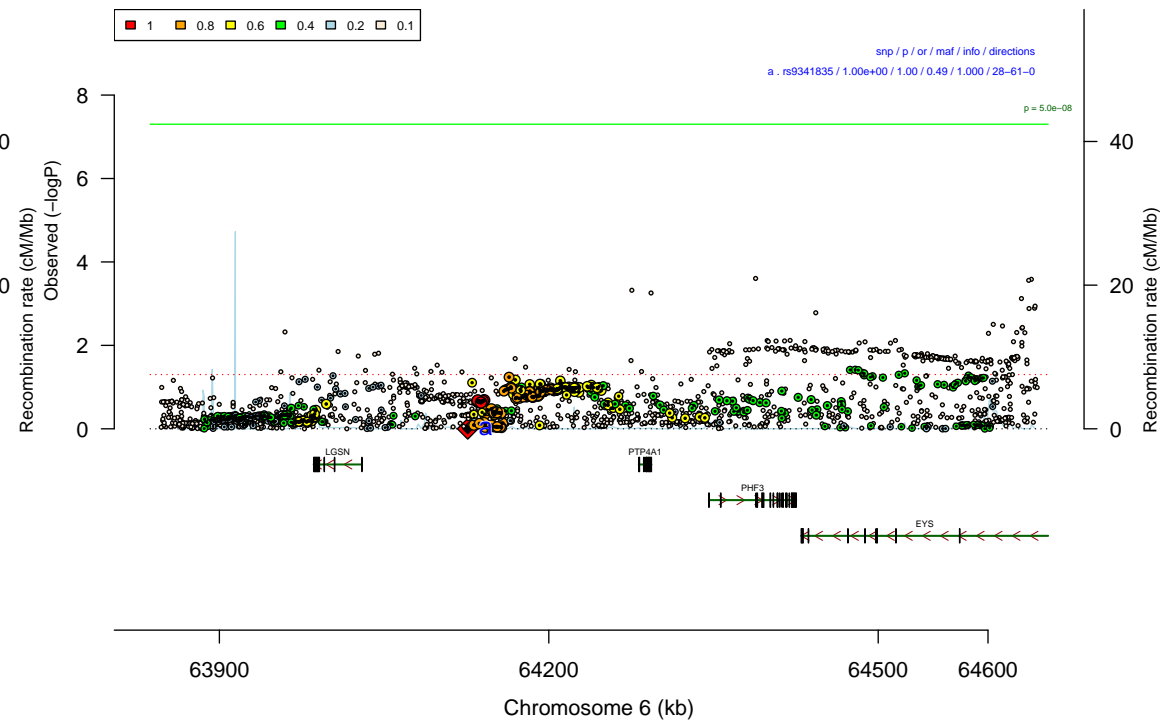

# SCZ\_uncond-rs500102-chr9

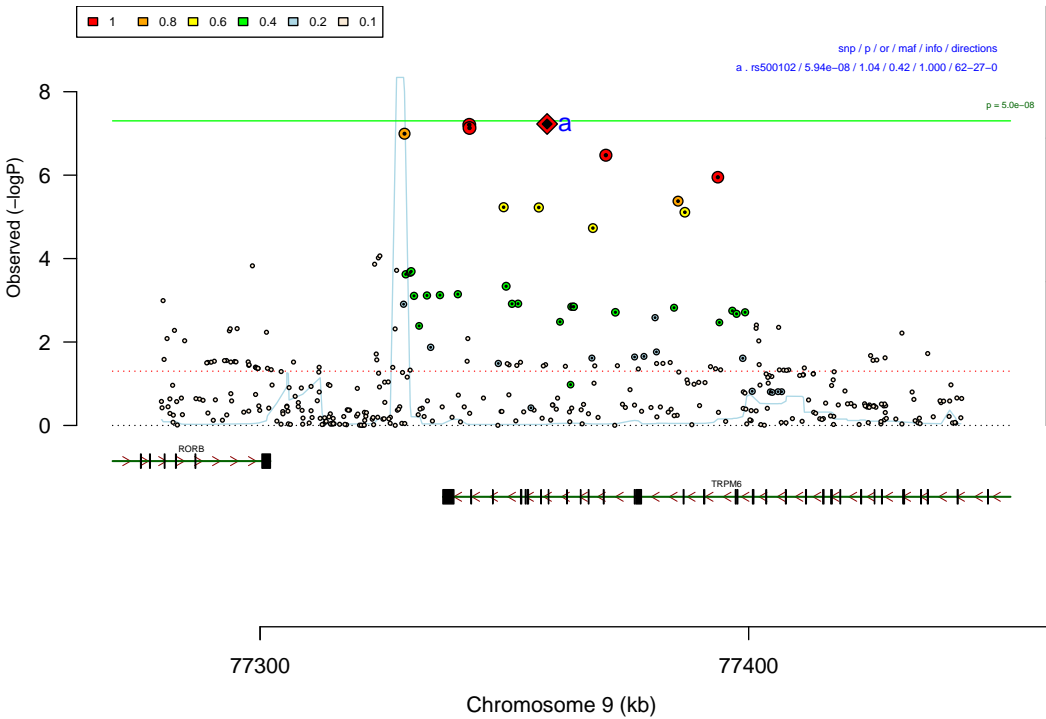

# SCZ\_cond-rs500102-chr9

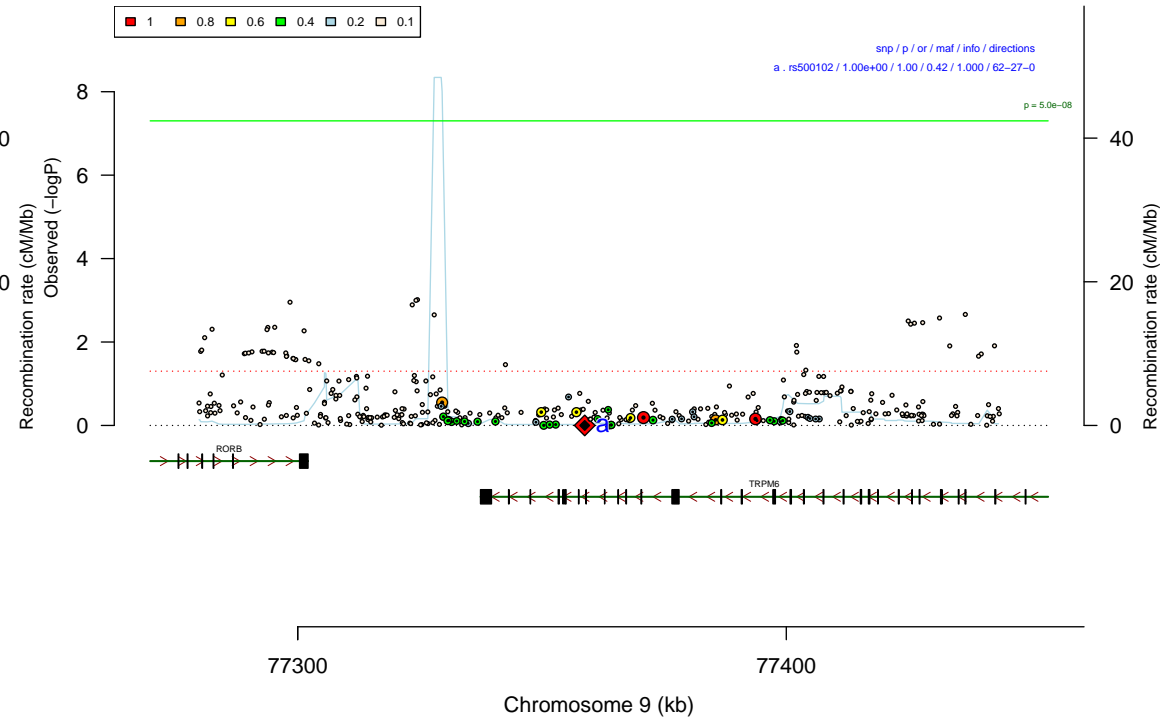

# SCZ\_uncond-rs10127983-chr1

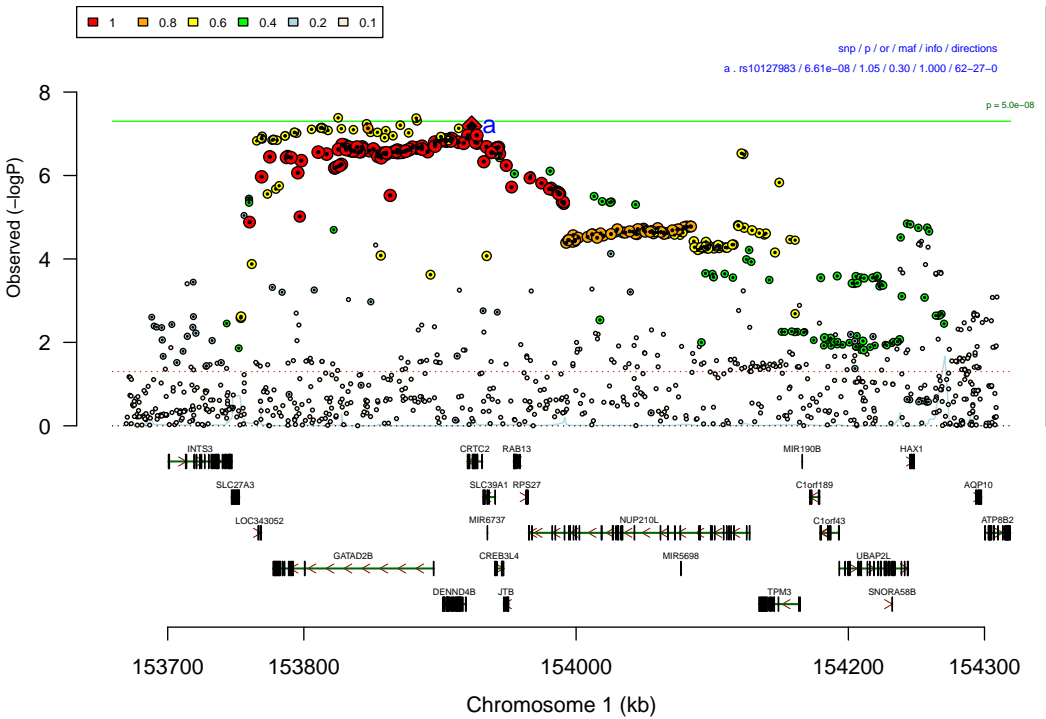

# SCZ\_cond-rs10127983-chr1

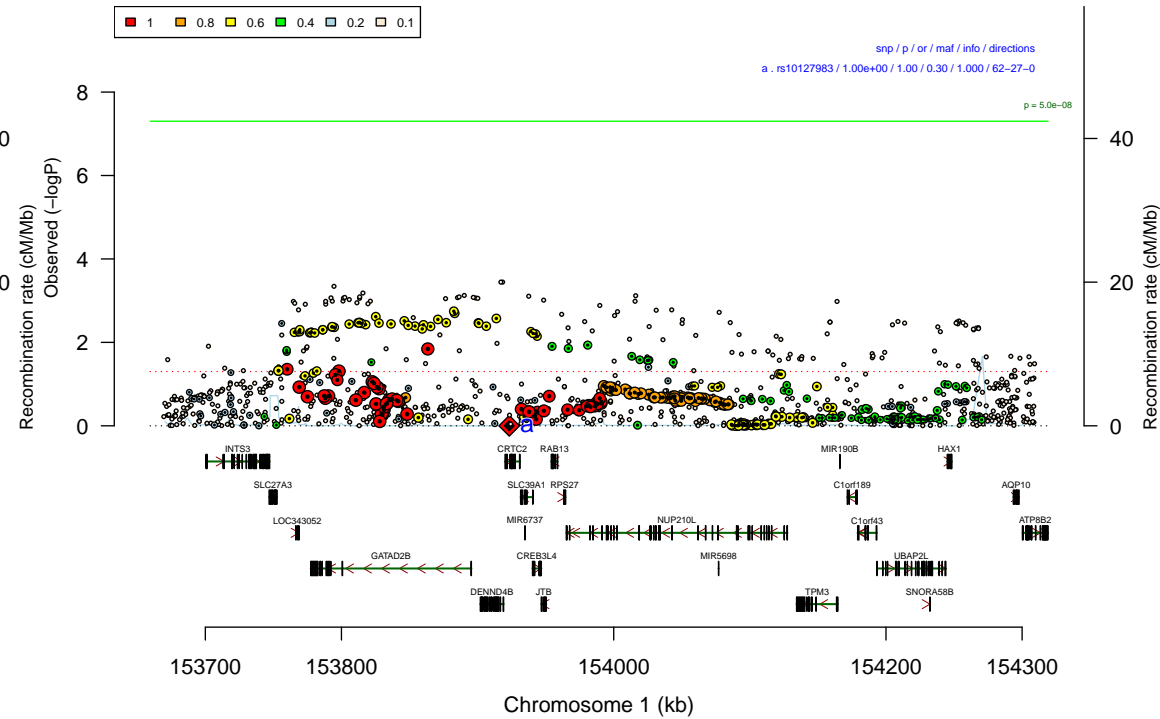

SCZ\_uncond-rs2890914-chr9

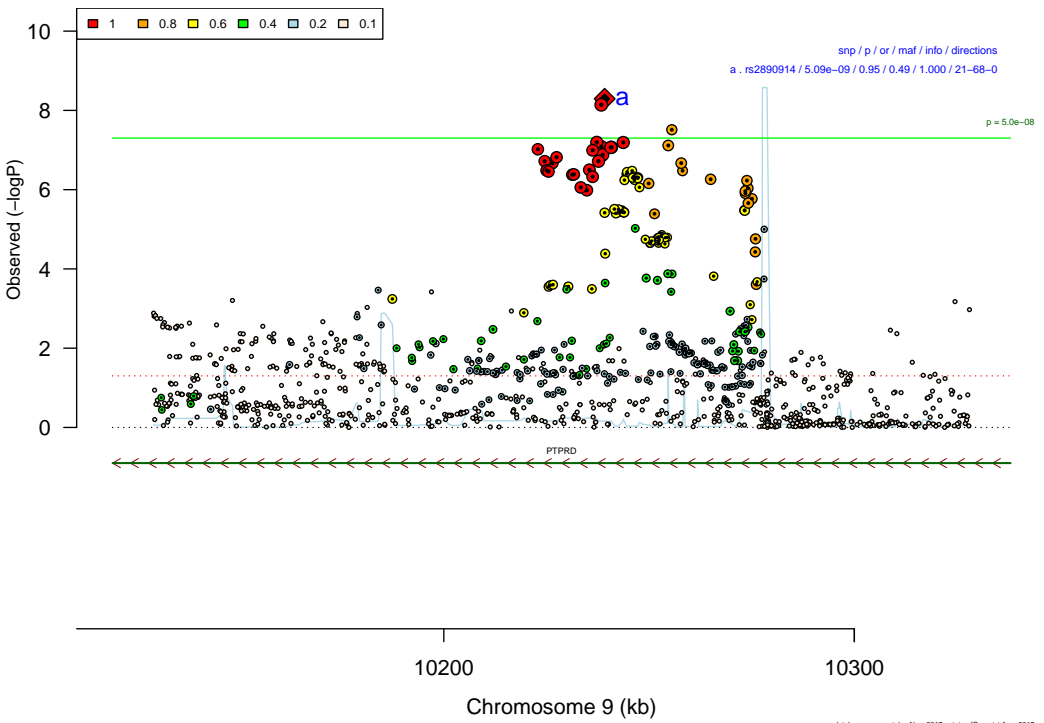

SCZ\_cond-rs2890914-chr9

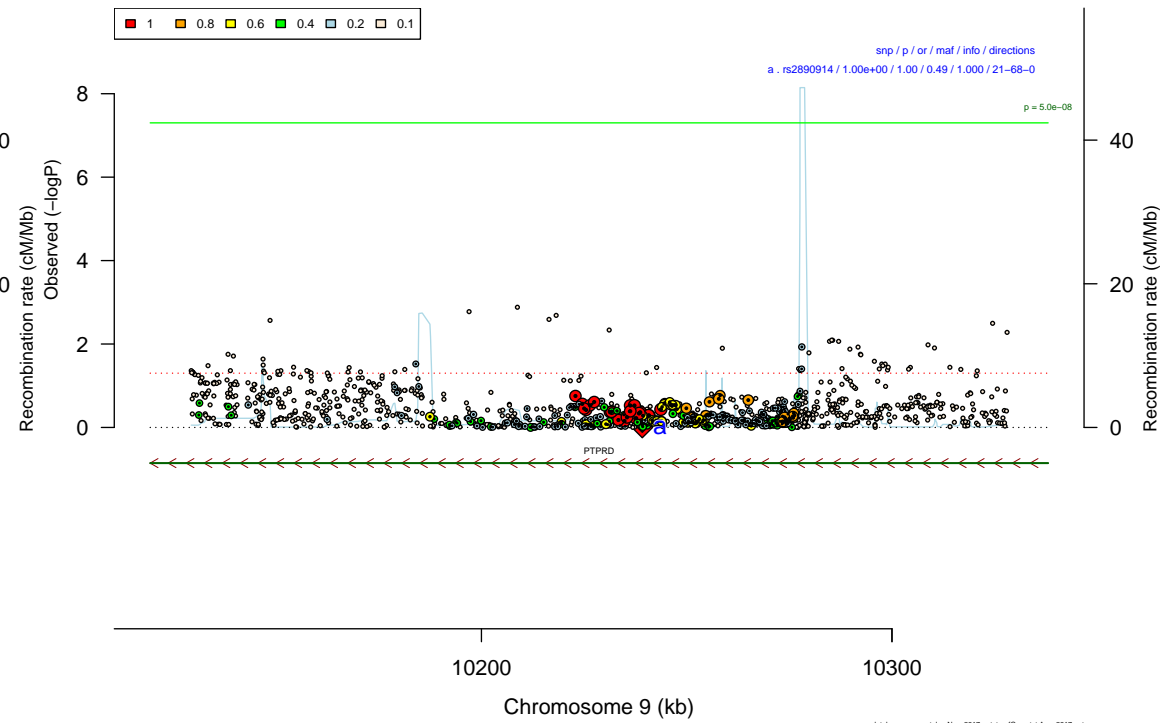

SCZ\_uncond-rs9390083-chr6

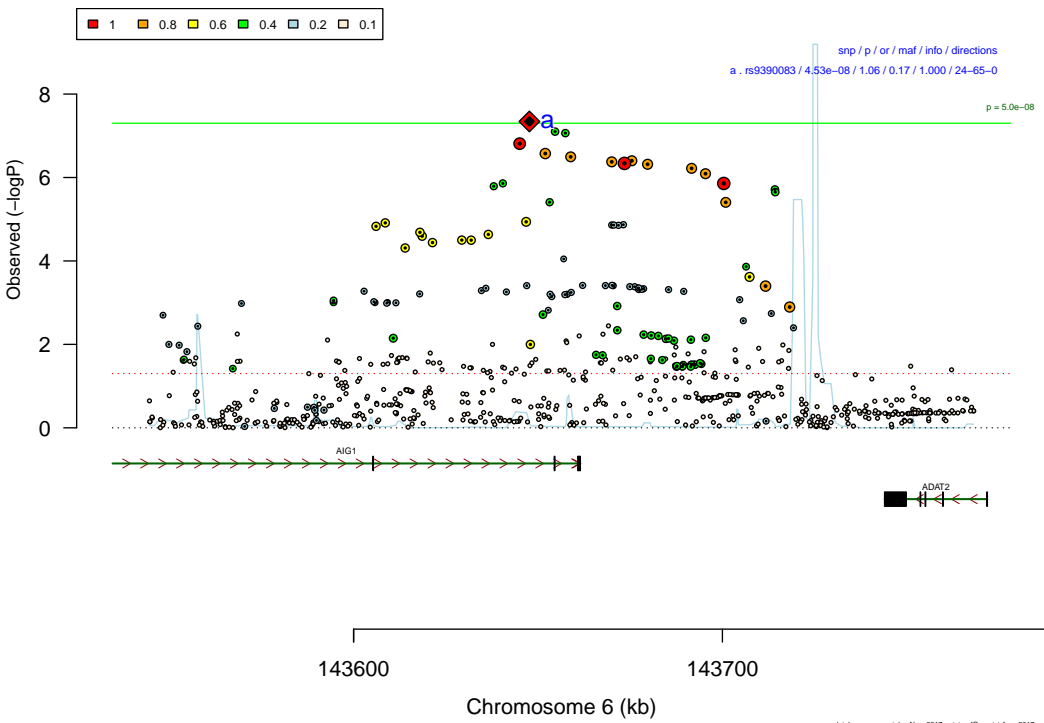

SCZ\_cond-rs9390083-chr6

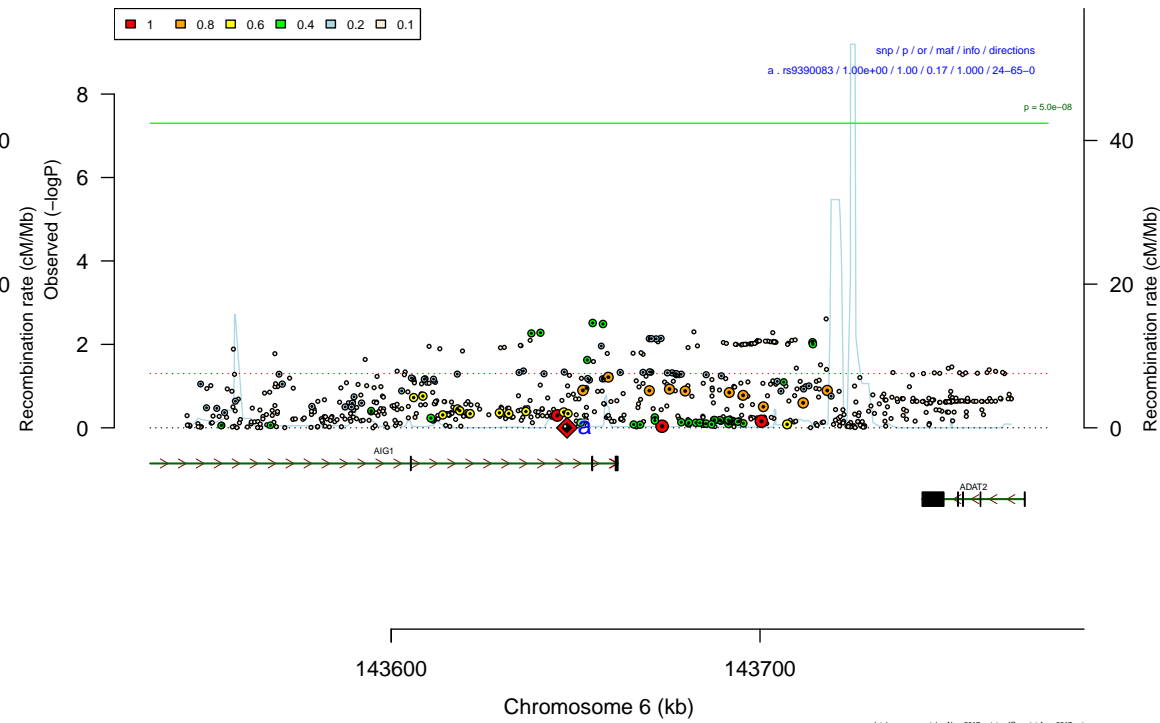

SCZ\_uncond-rs4672366-chr2

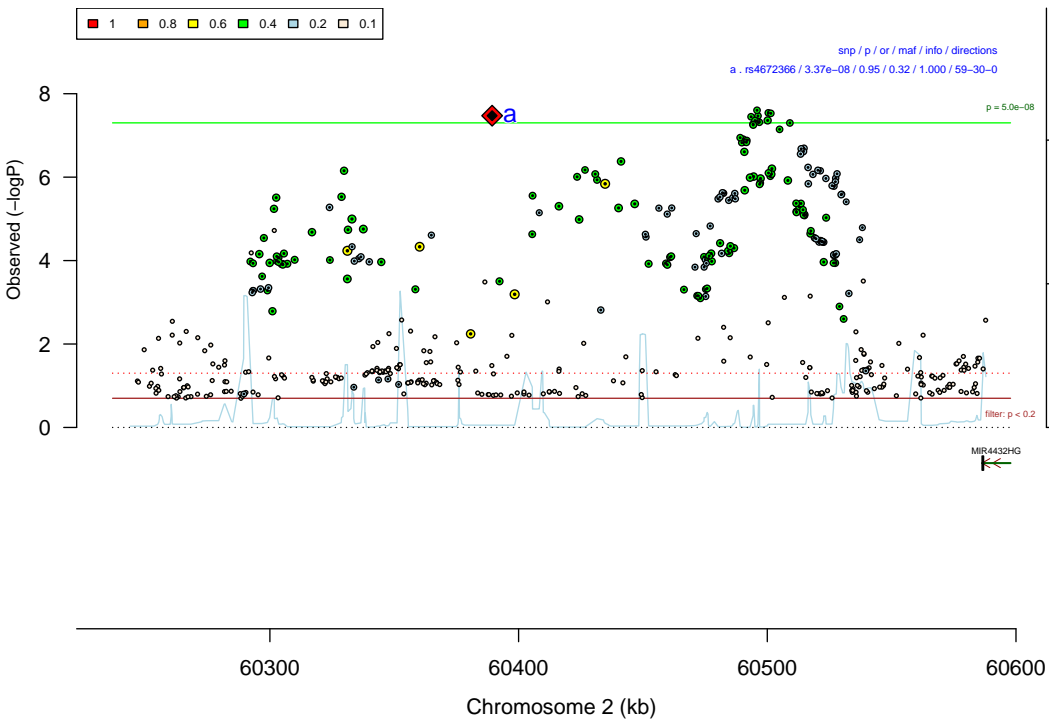

SCZ\_cond-rs4672366-chr2

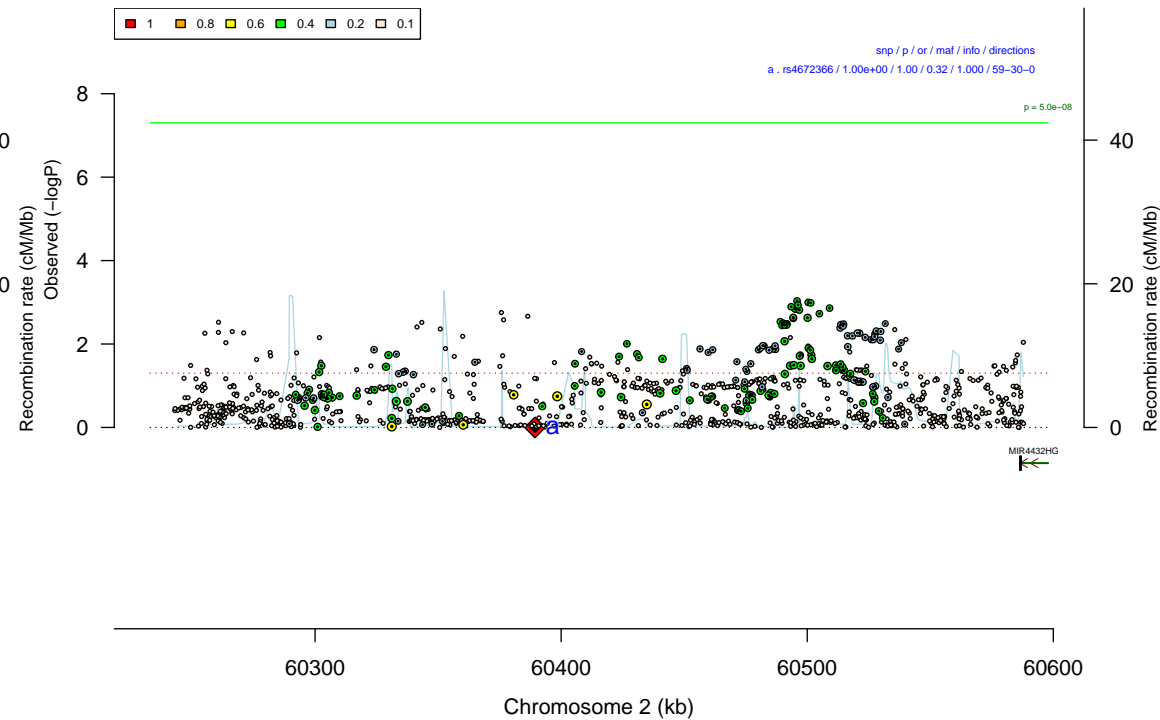

SCZ\_uncond-rs13032111-chr2

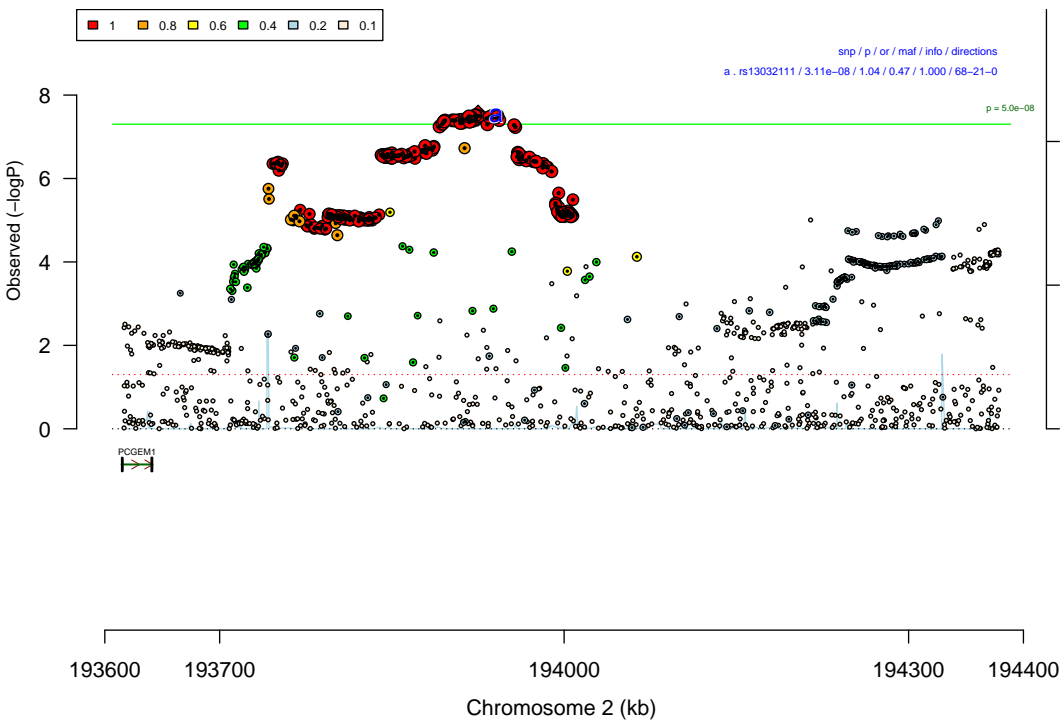

SCZ\_cond-rs13032111-chr2

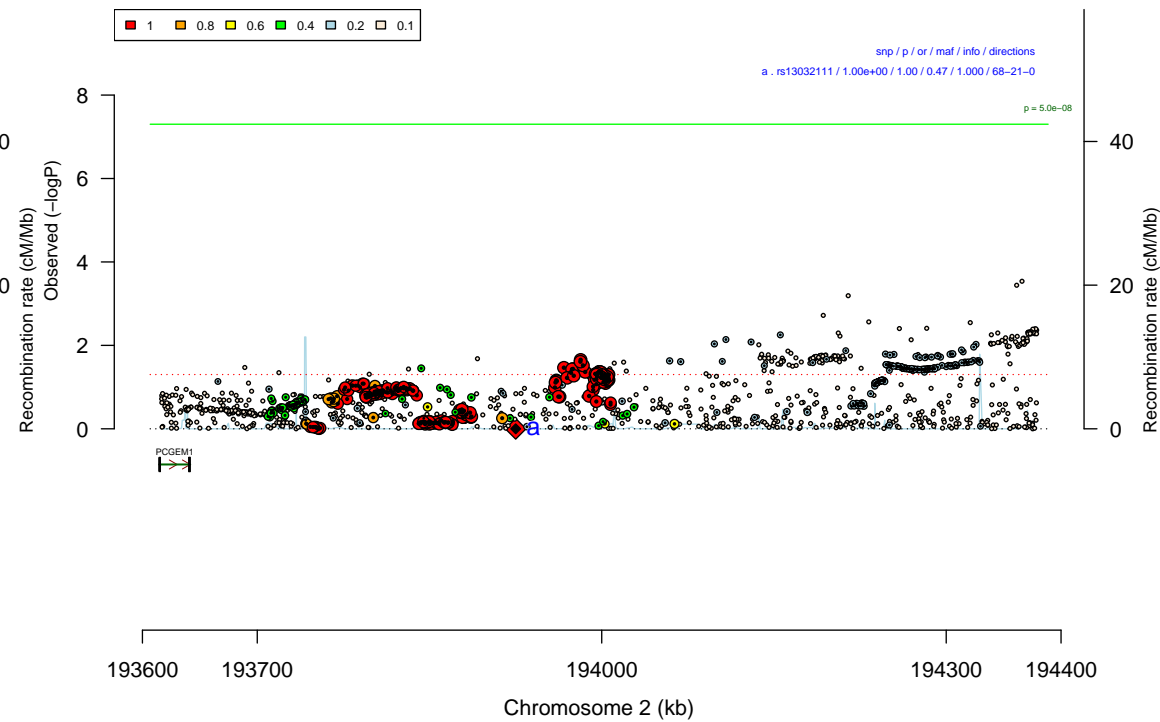



SCZ\_uncond-rs6010045-chr22

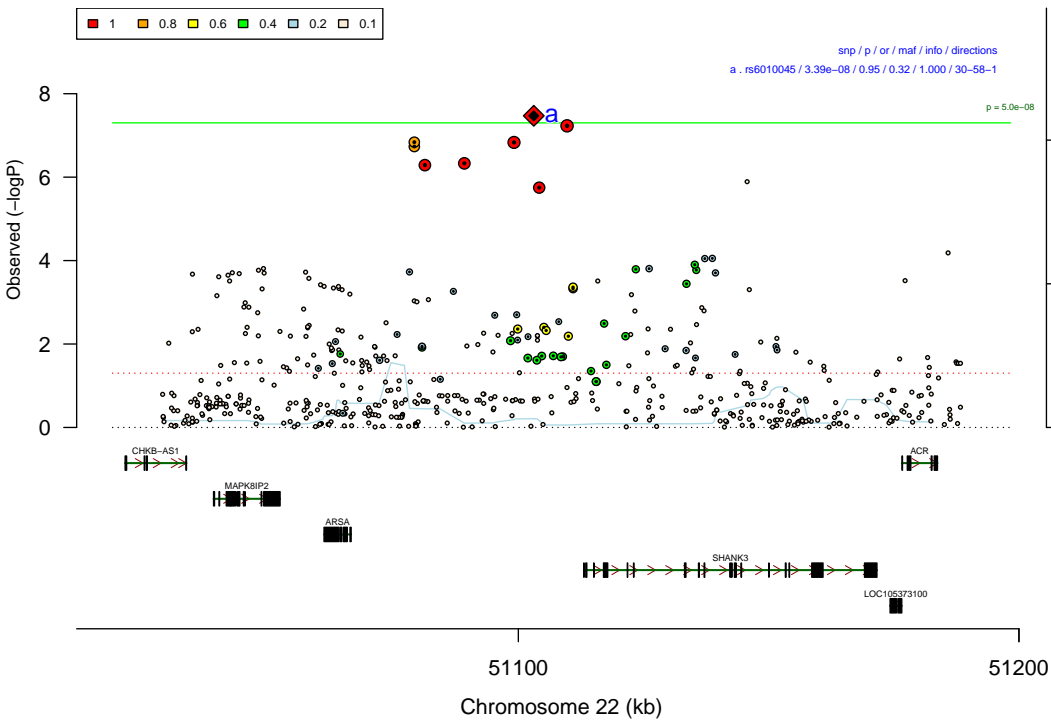

SCZ\_cond-rs6010045-chr22

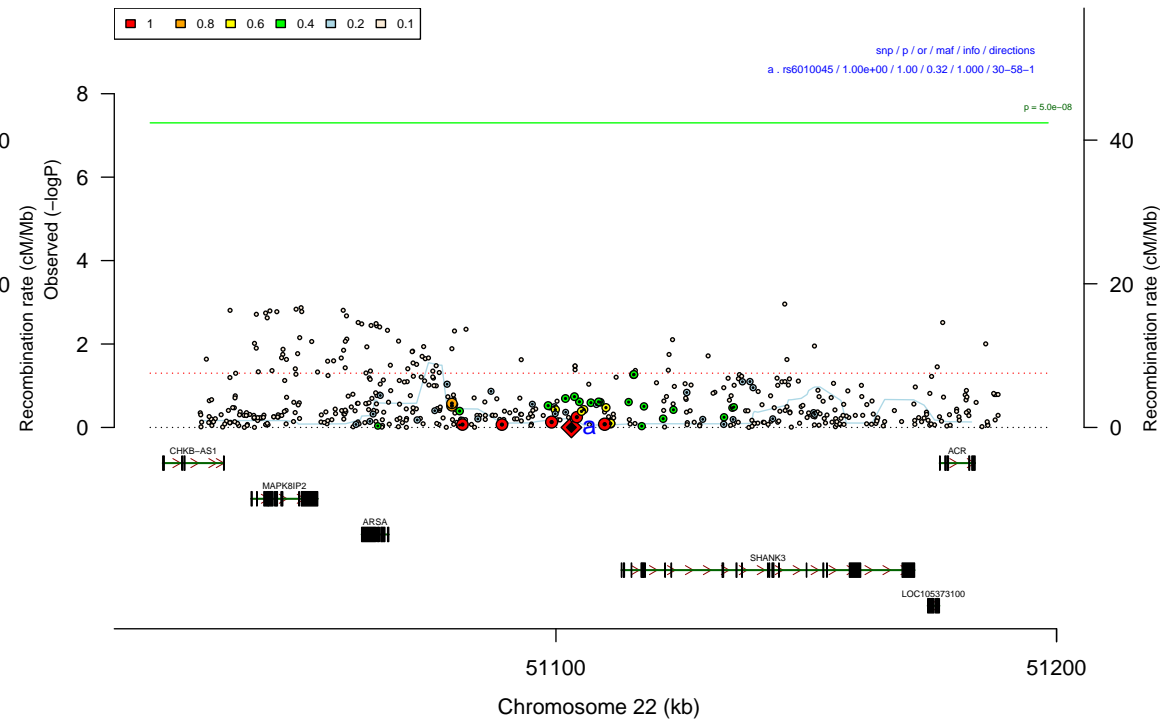

SCZ\_uncond-rs337718-chr18

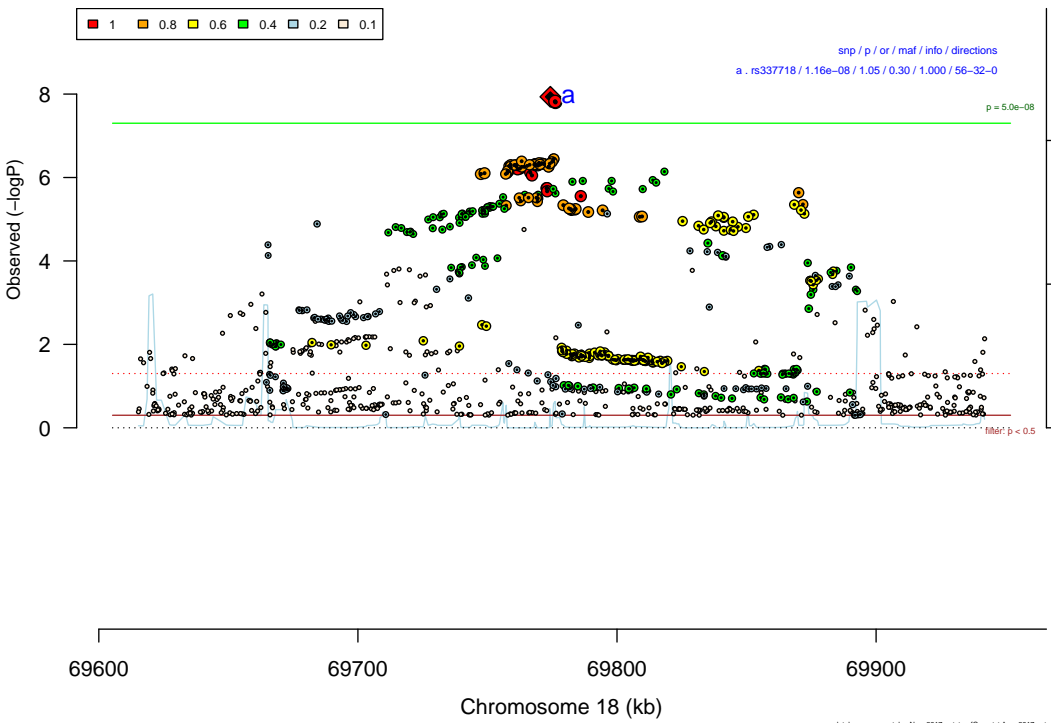

SCZ\_cond-rs337718-chr18

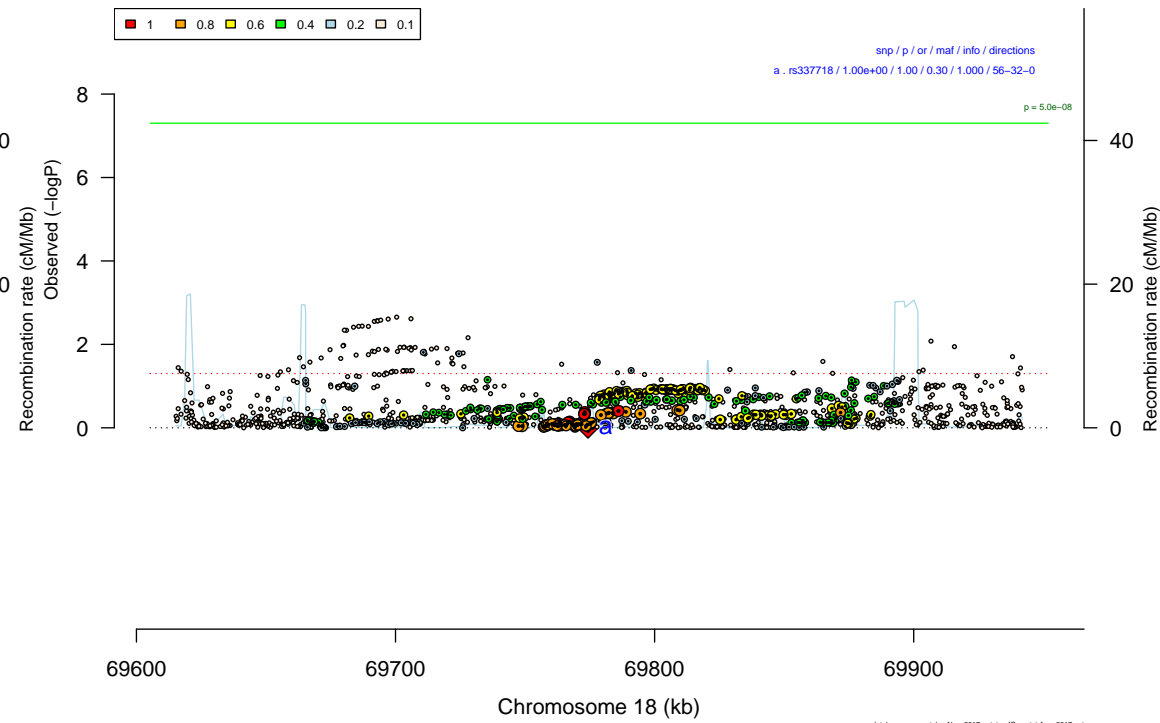



SCZ\_uncond-rs758749-chr19

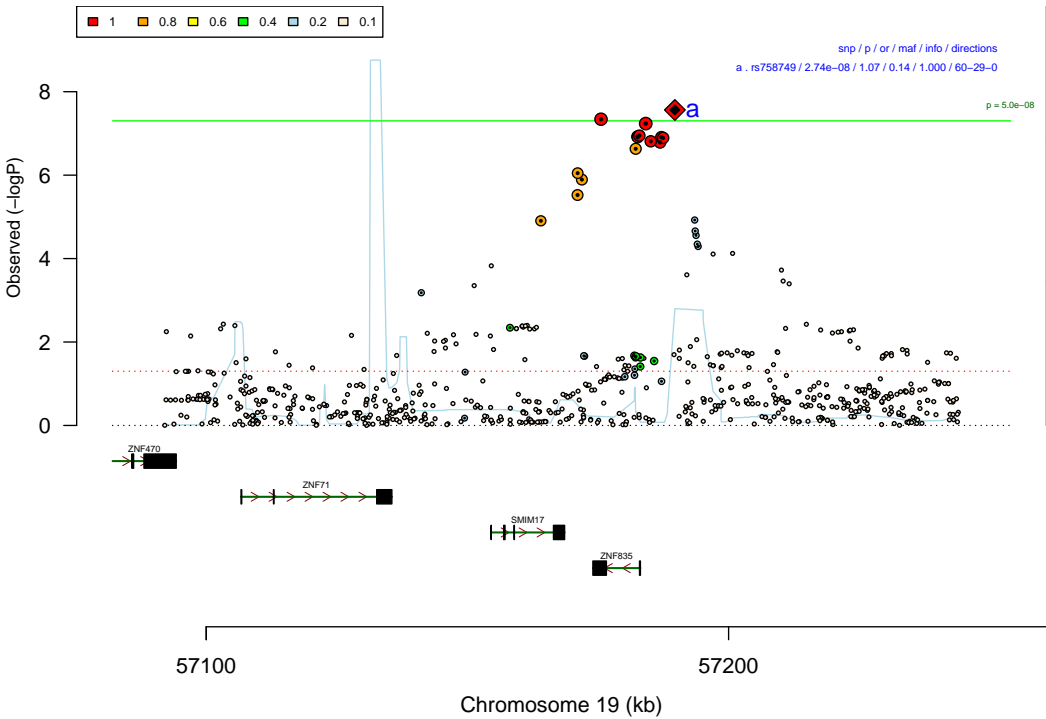

SCZ\_cond-rs758749-chr19

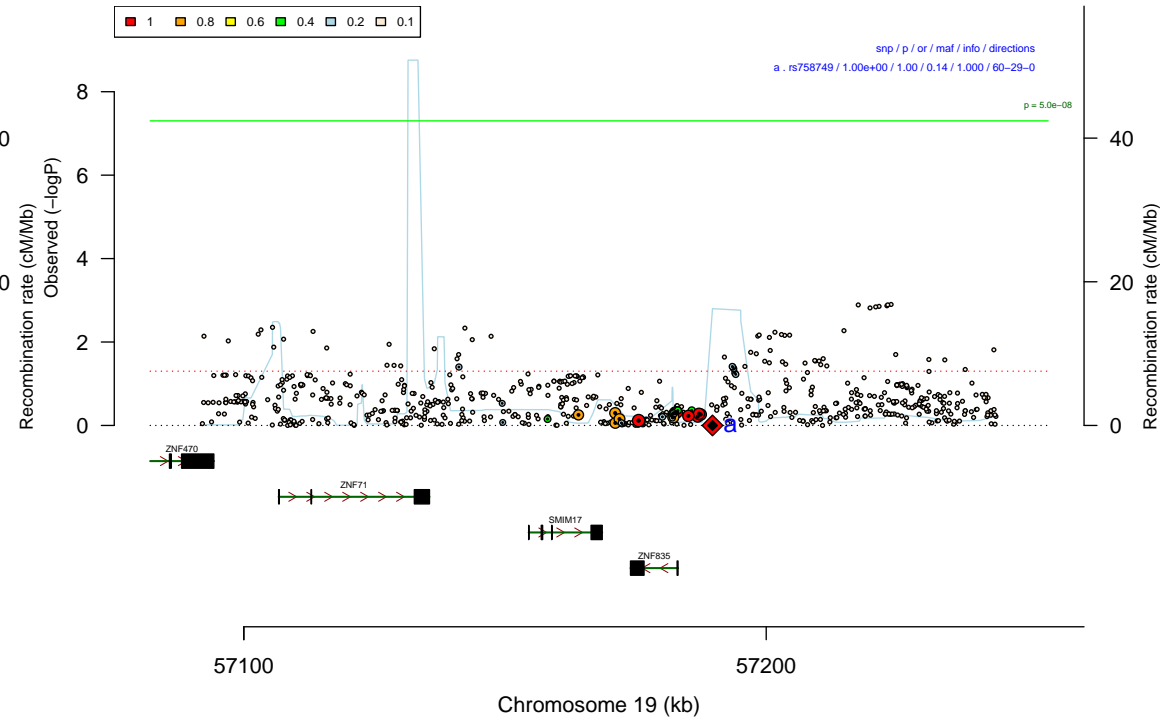

SCZ\_uncond-rs144821294-chr19

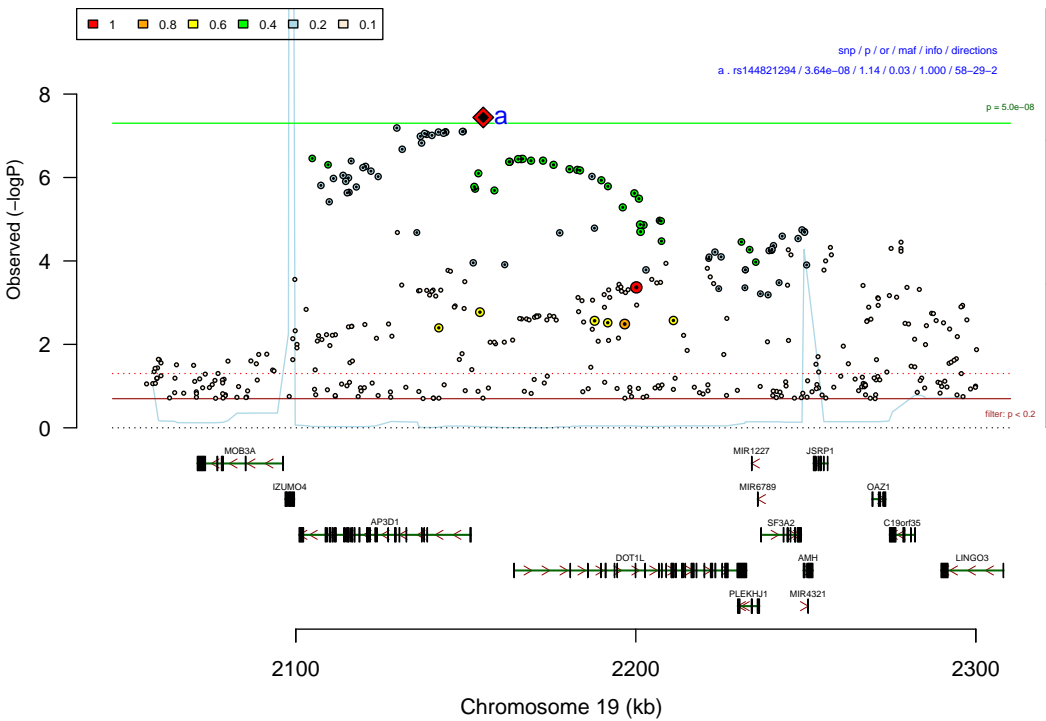

SCZ\_cond-rs144821294-chr19

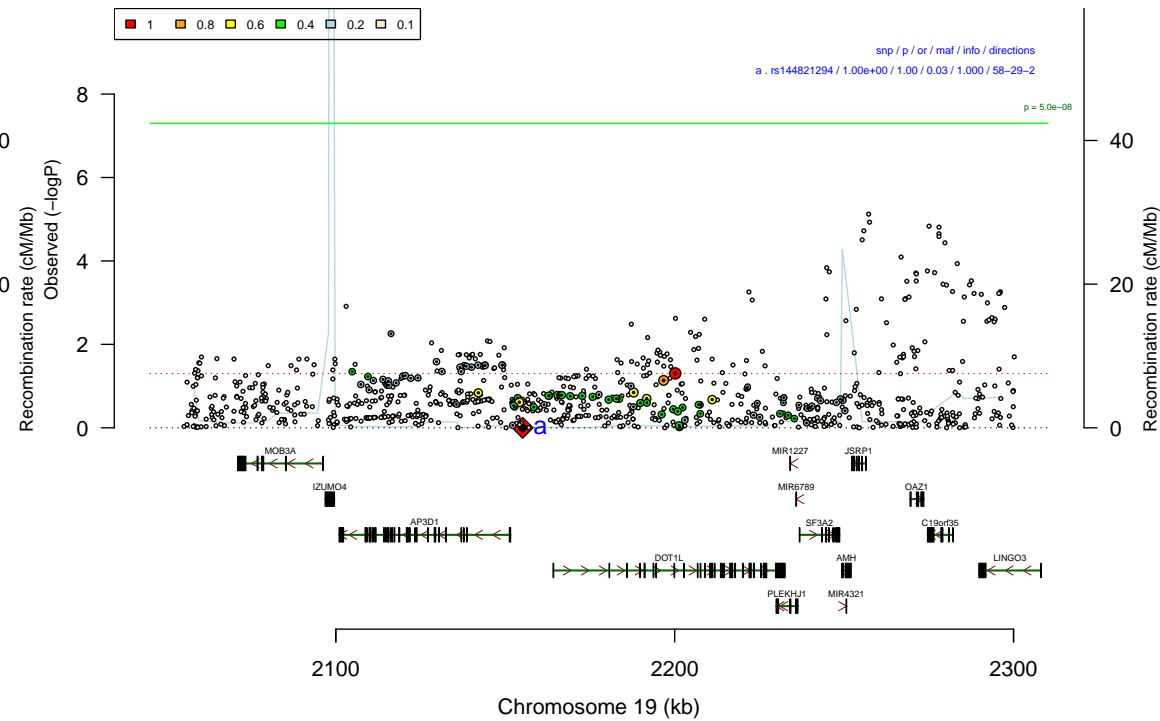

SCZ\_uncond-rs999494-chr2

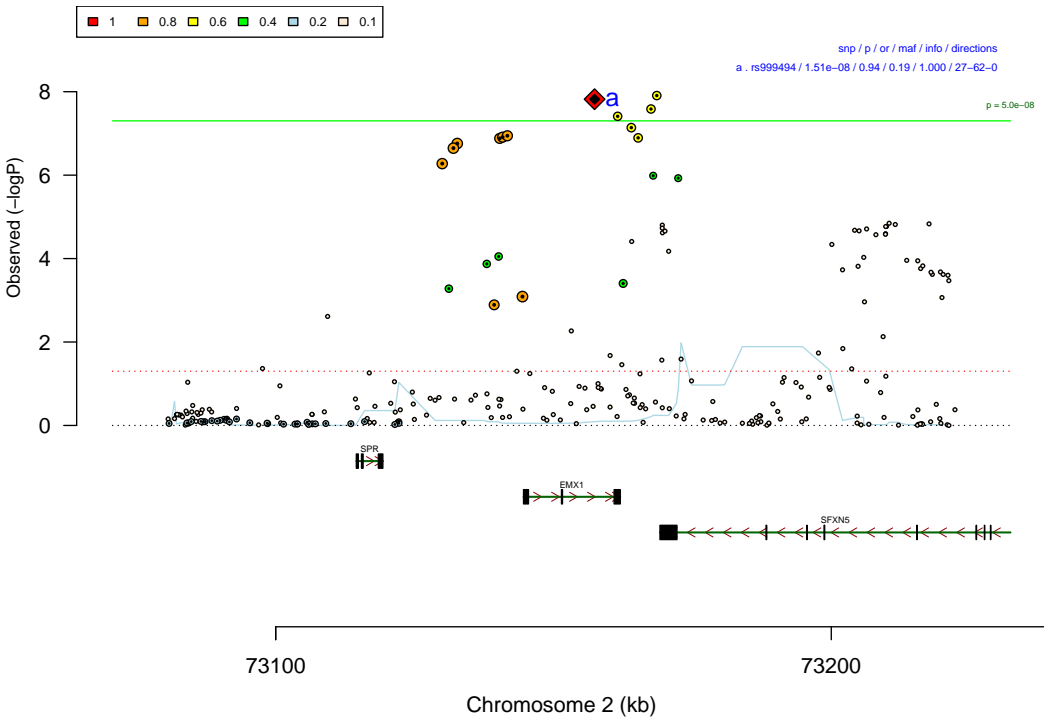

SCZ\_cond-rs999494-chr2

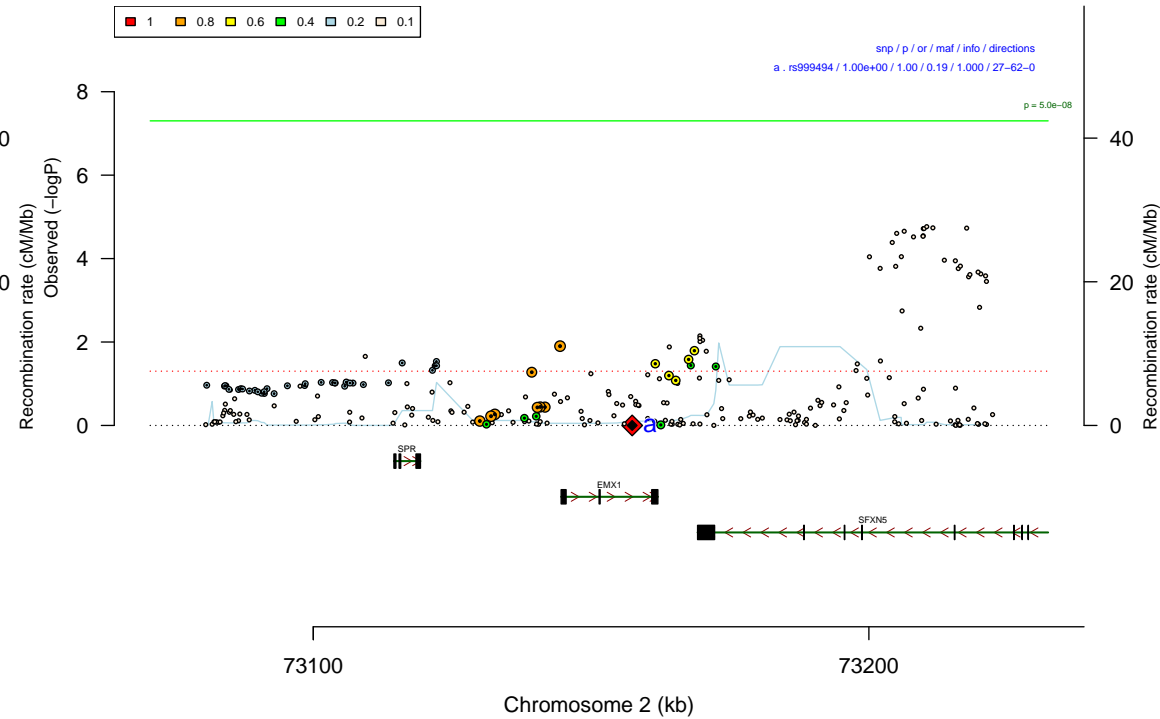

SCZ\_uncond-rs12652777-chr5

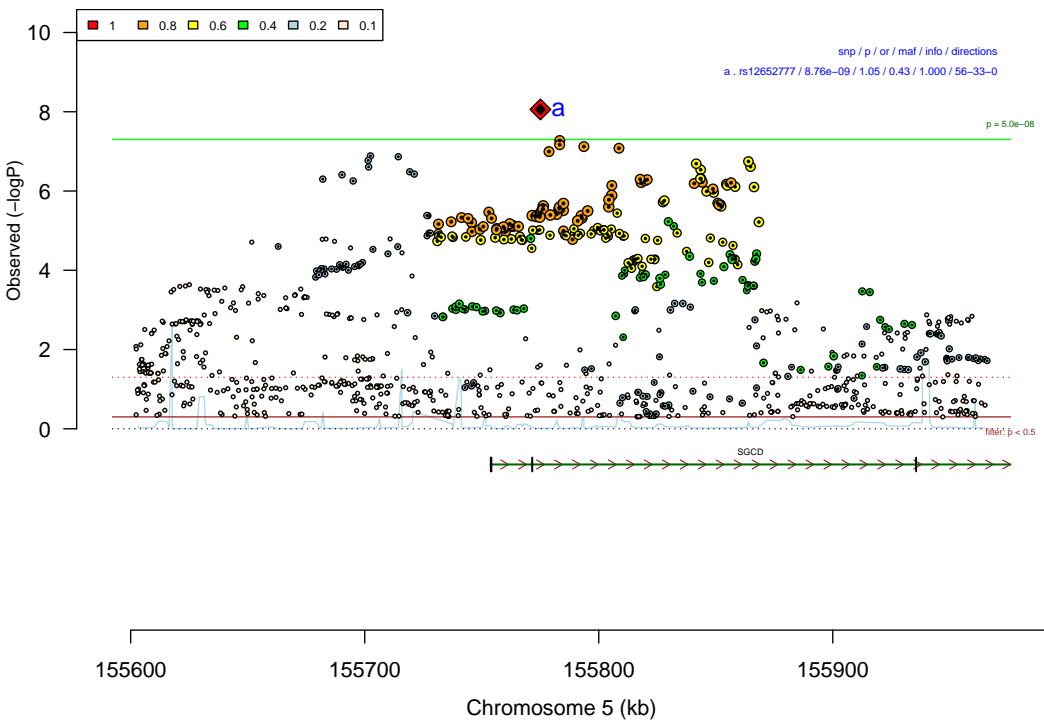

SCZ\_cond-rs12652777-chr5

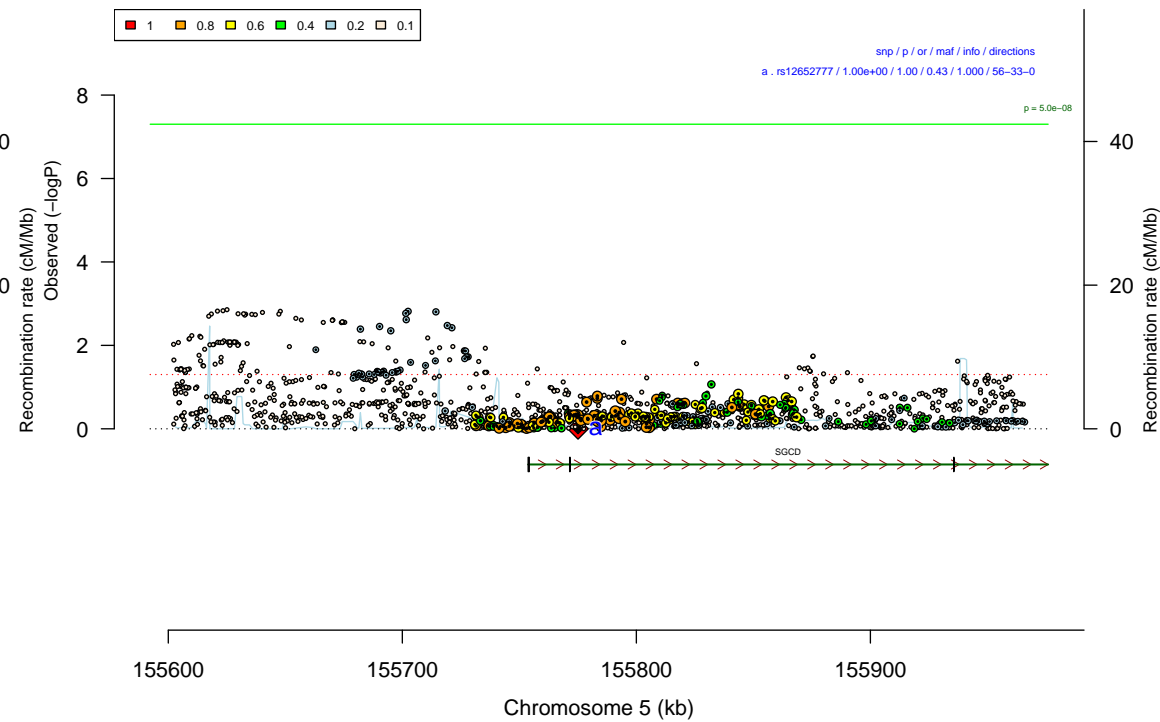

SCZ\_uncond-rs8096175-chr18

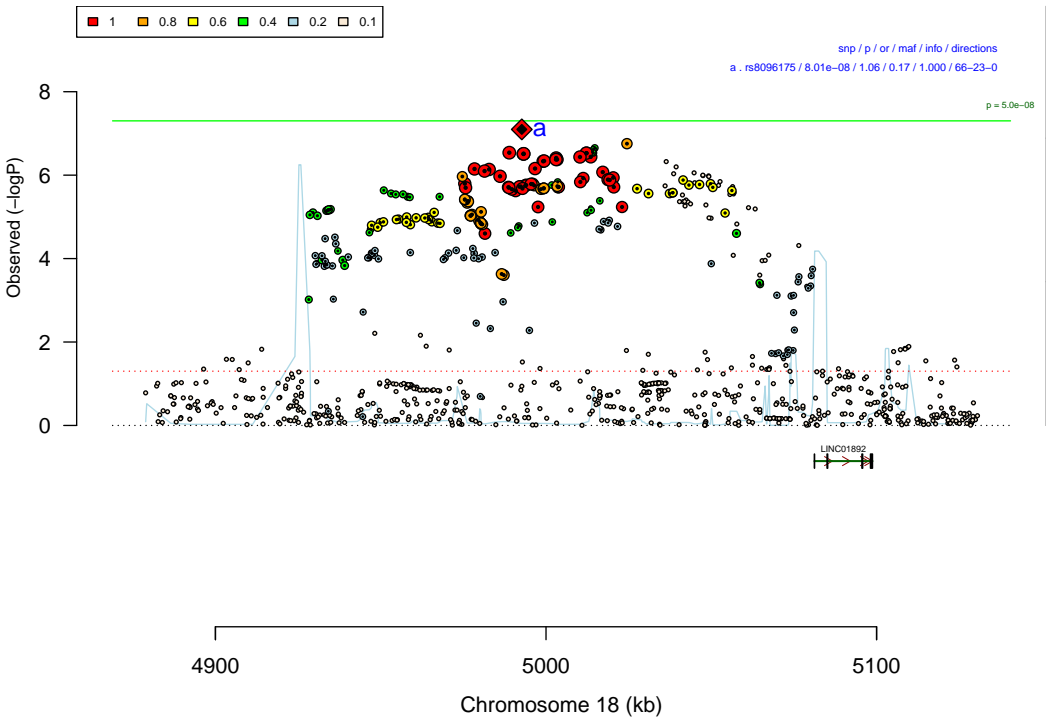

SCZ\_cond-rs8096175-chr18

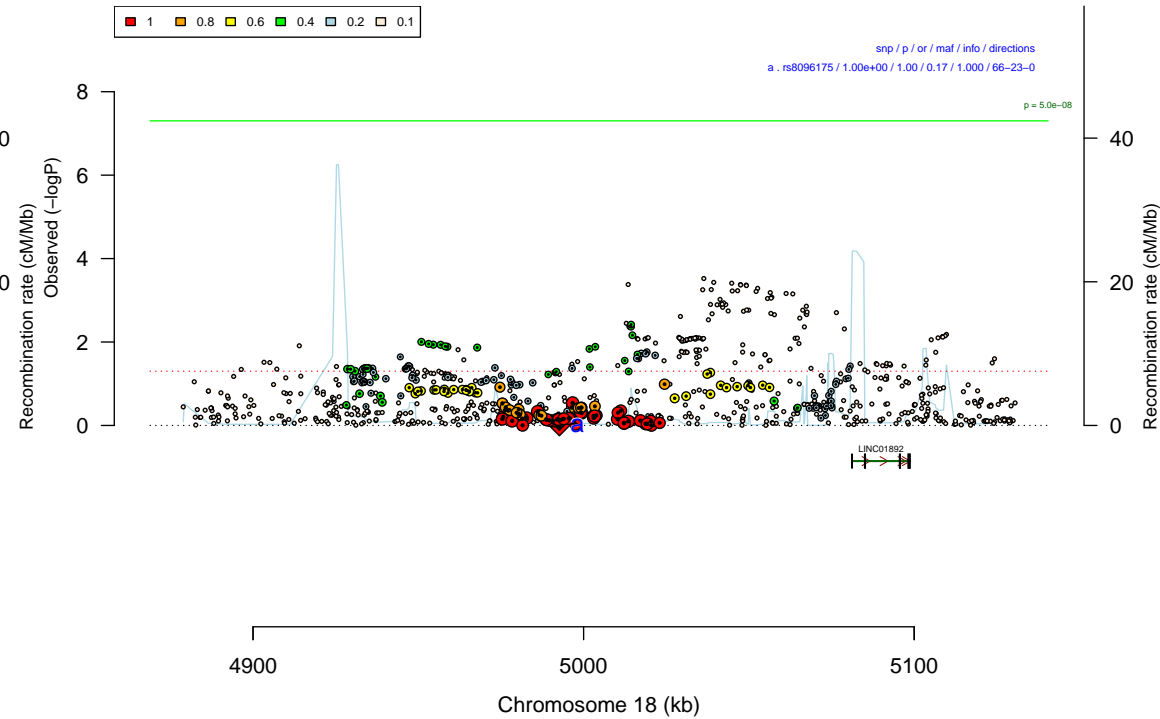

SCZ\_uncond-rs62184960-chr2

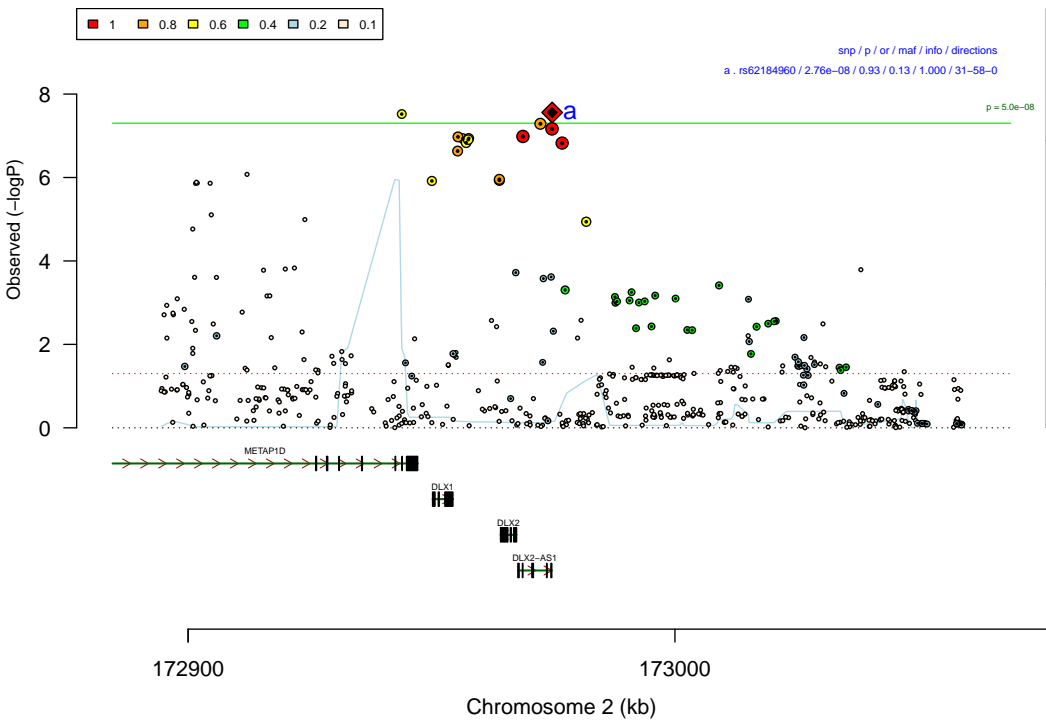

SCZ\_cond-rs62184960-chr2

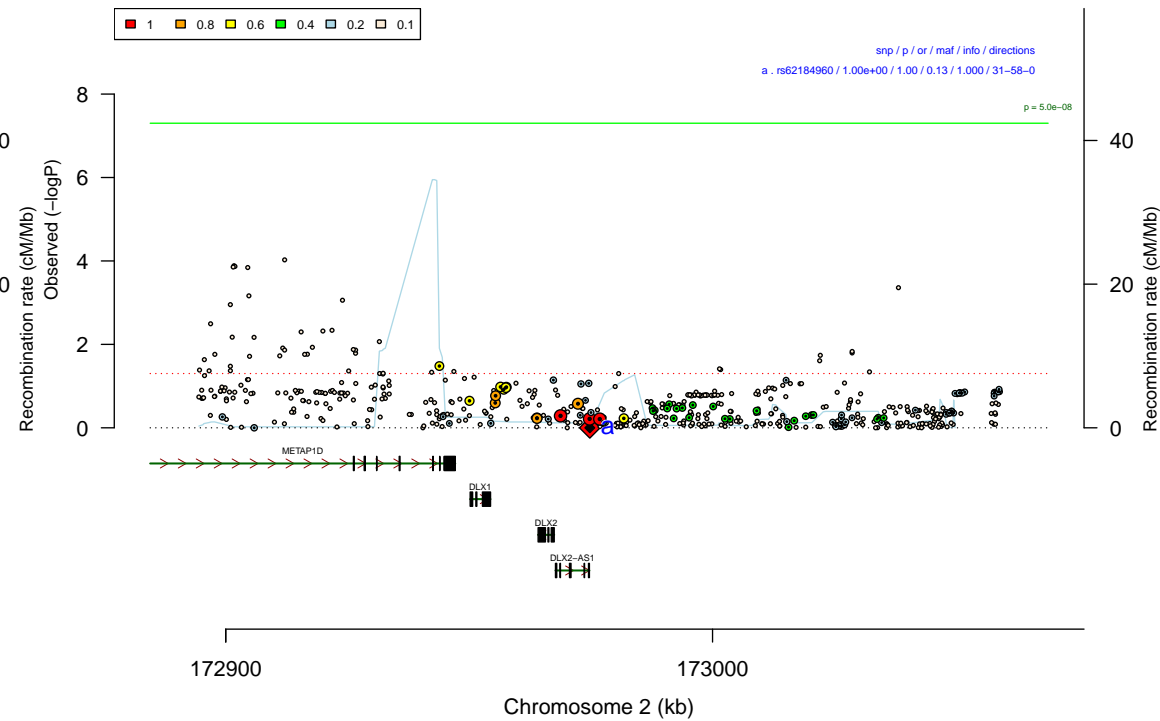

SCZ\_uncond-rs72761691-chr9

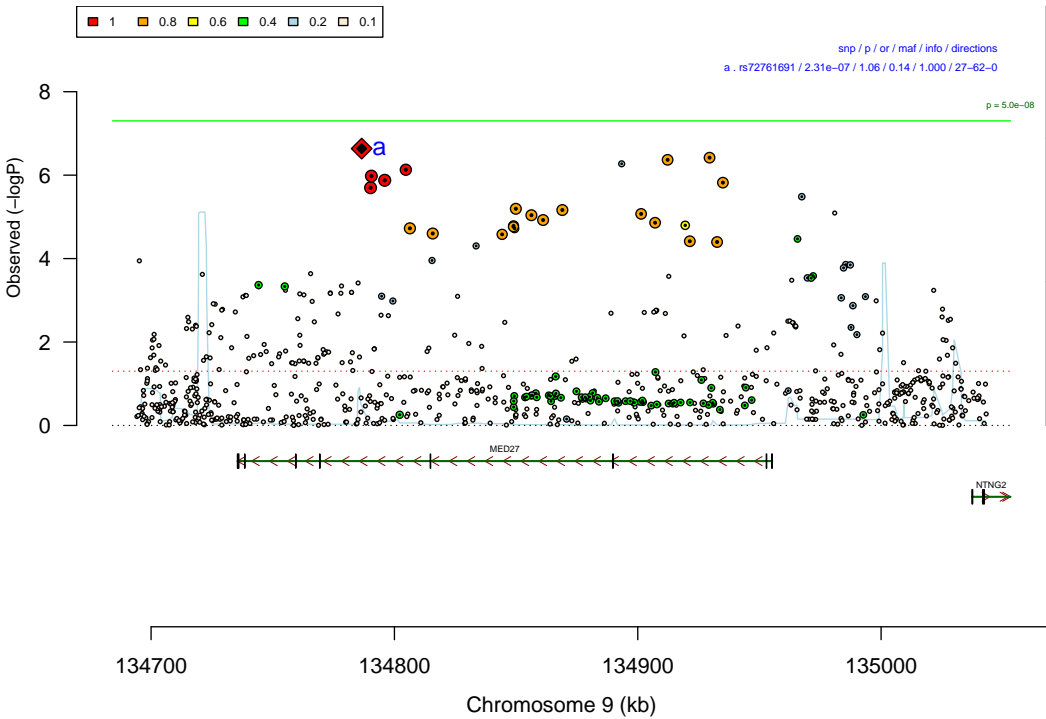

SCZ\_cond-rs72761691-chr9

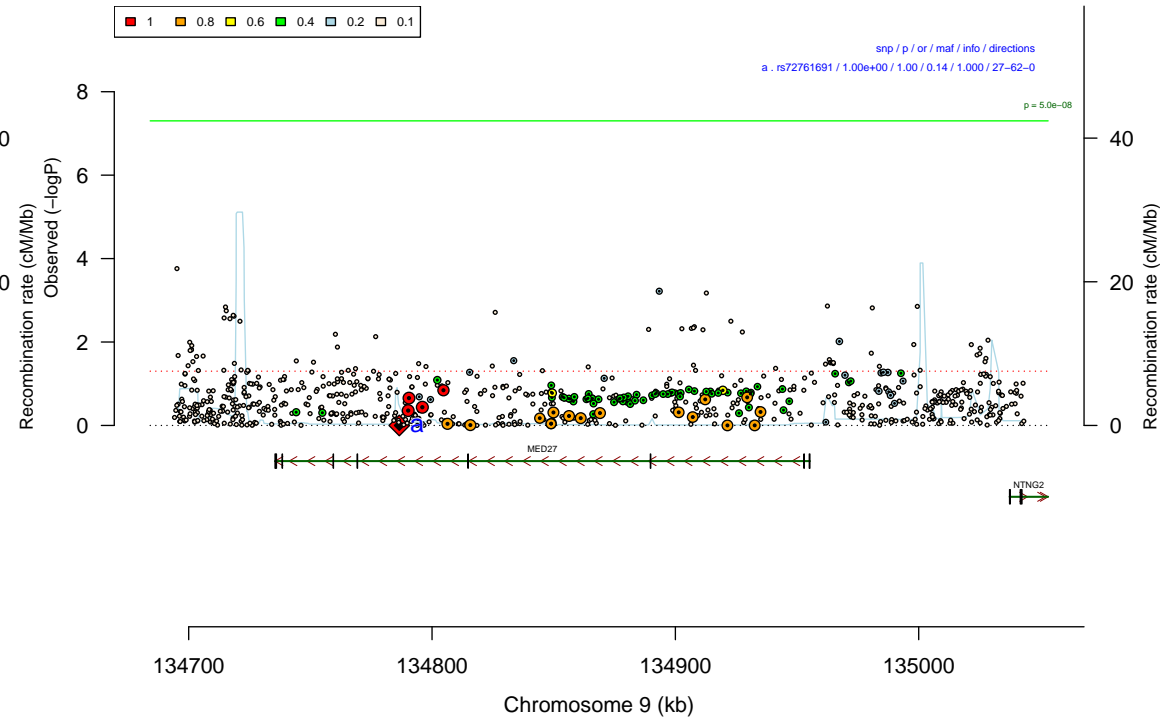

SCZ\_uncond-rs7915131-chr10

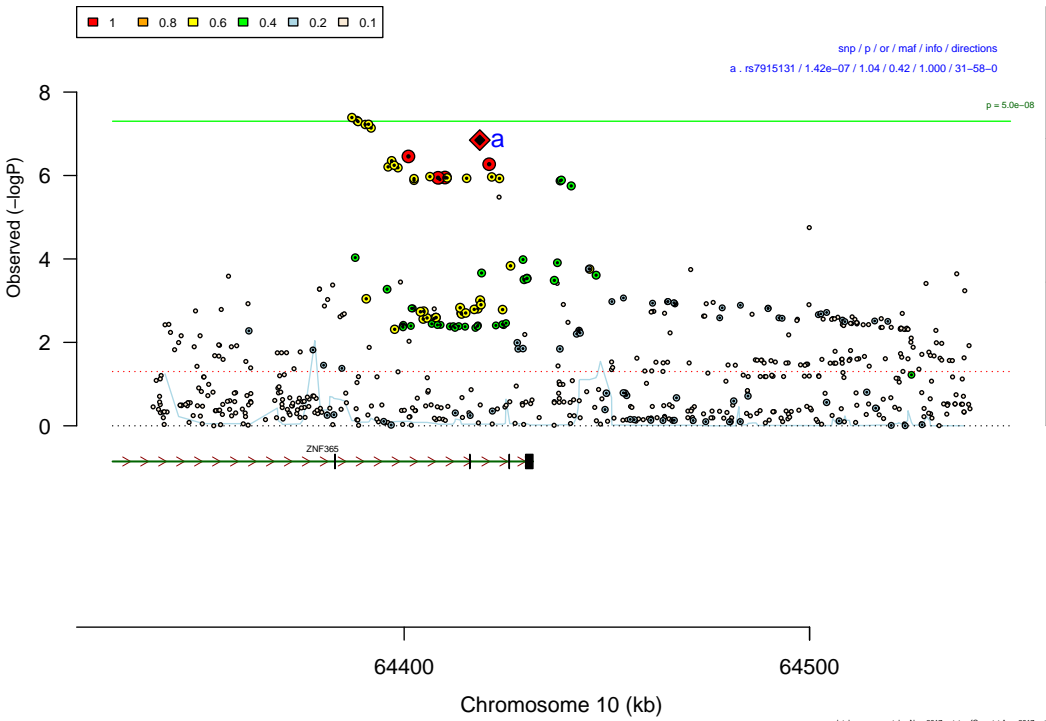

SCZ\_cond-rs7915131-chr10

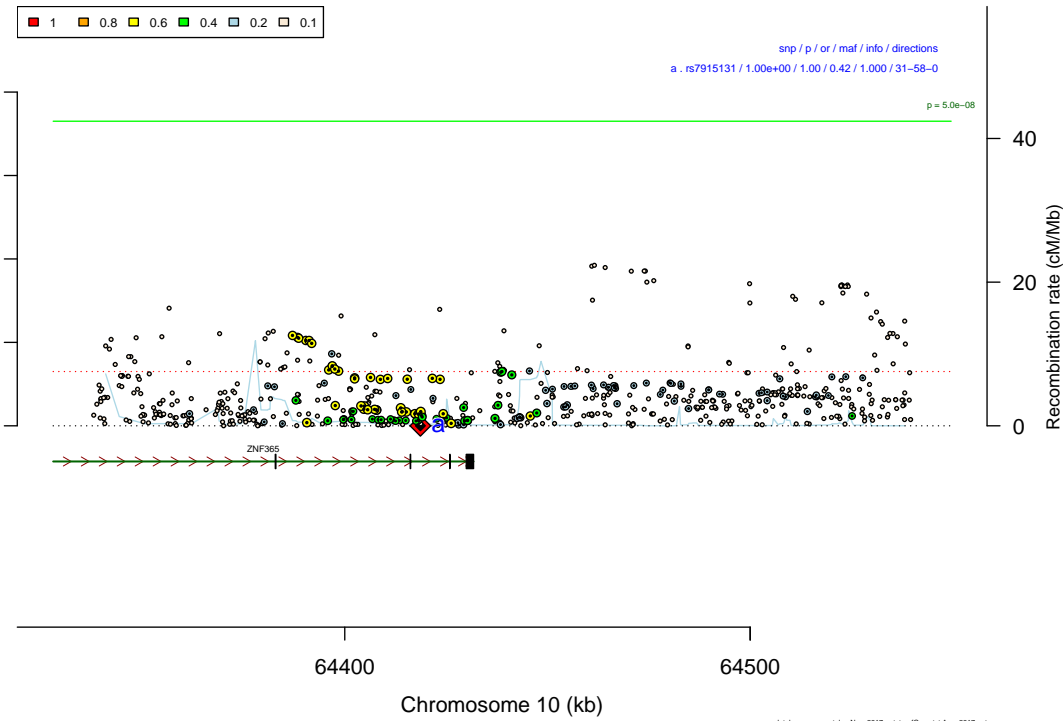

SCZ\_uncond-rs2806737-chr13

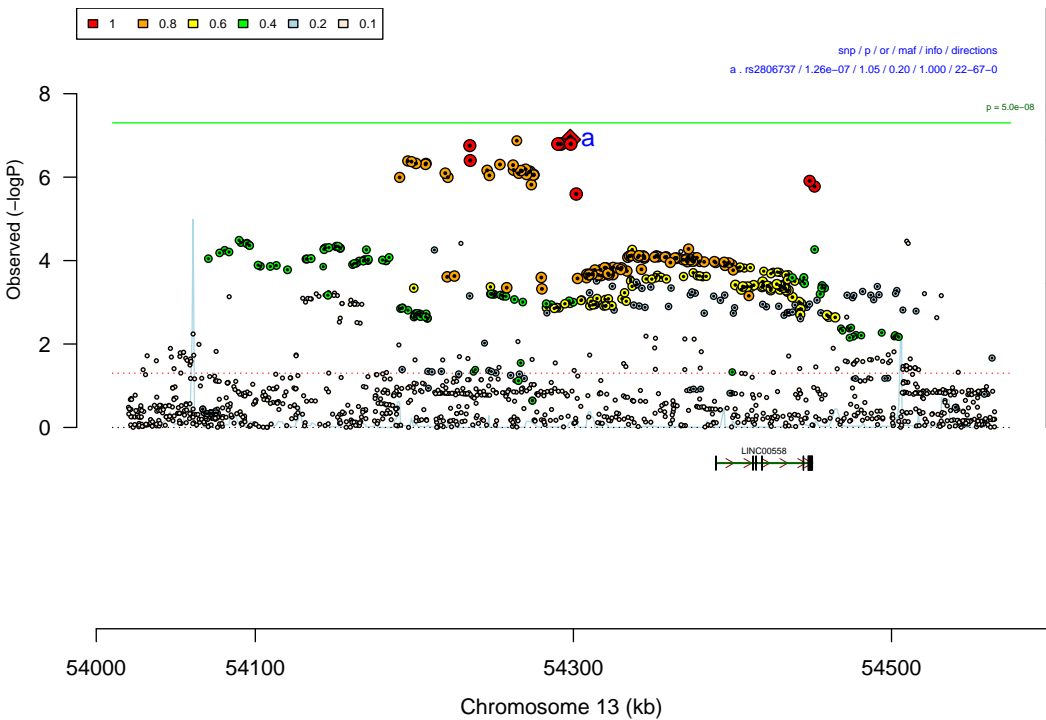

SCZ\_cond-rs2806737-chr13

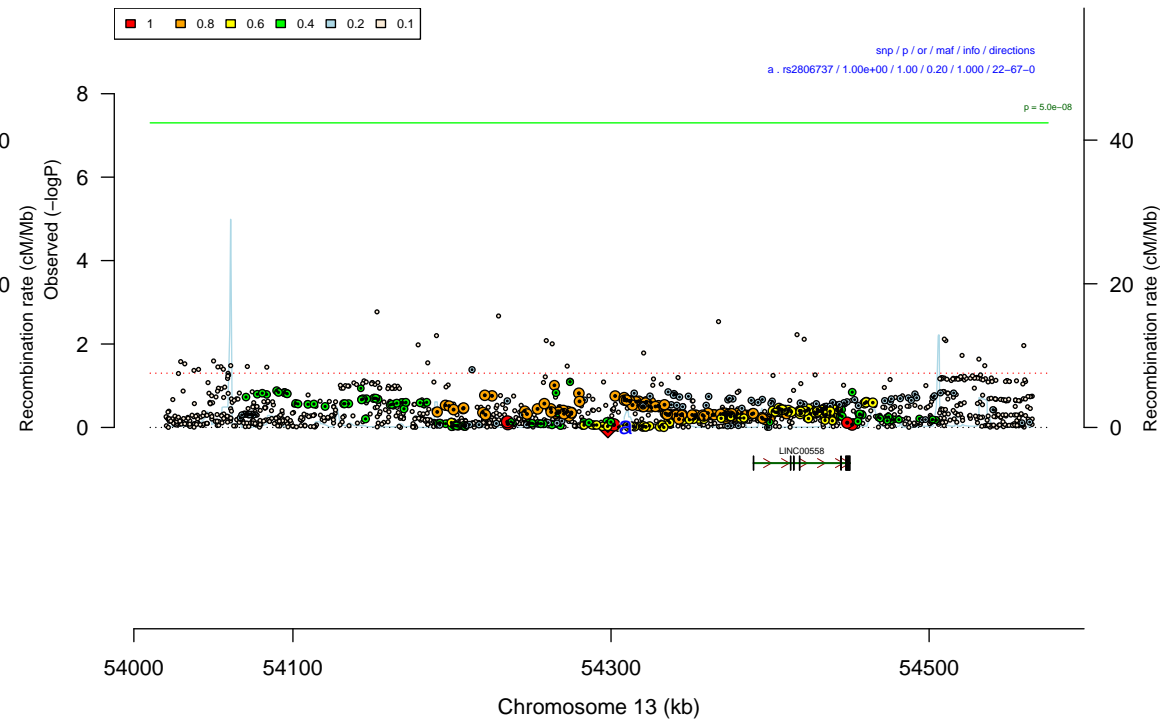

SCZ\_uncond-rs7609876-chr3

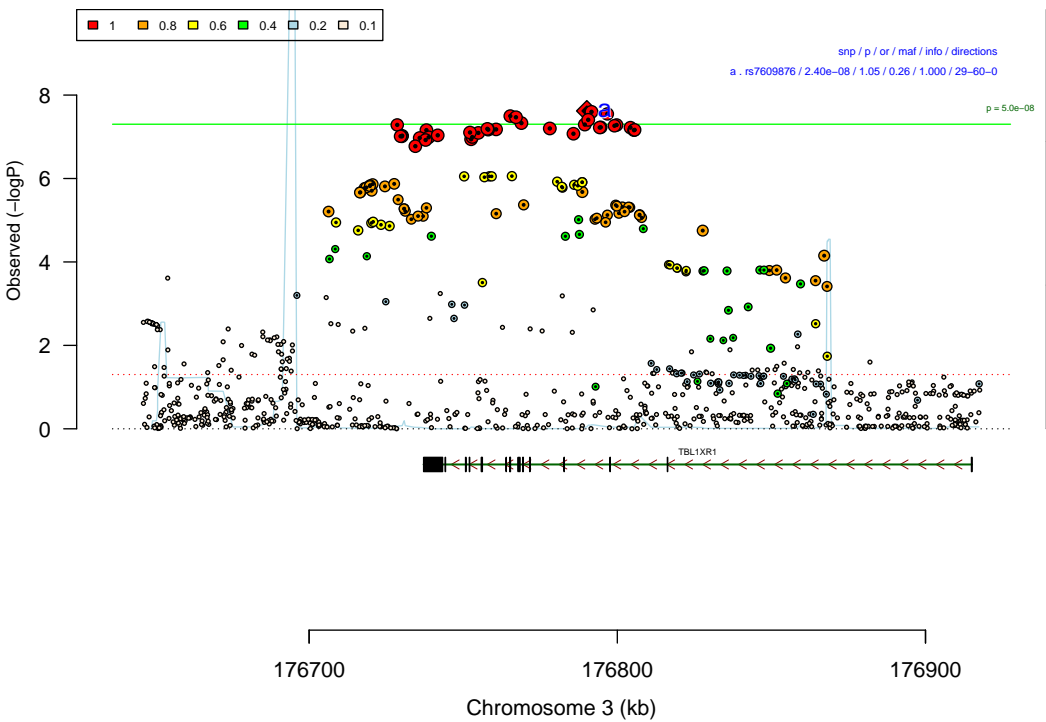

SCZ\_cond-rs7609876-chr3

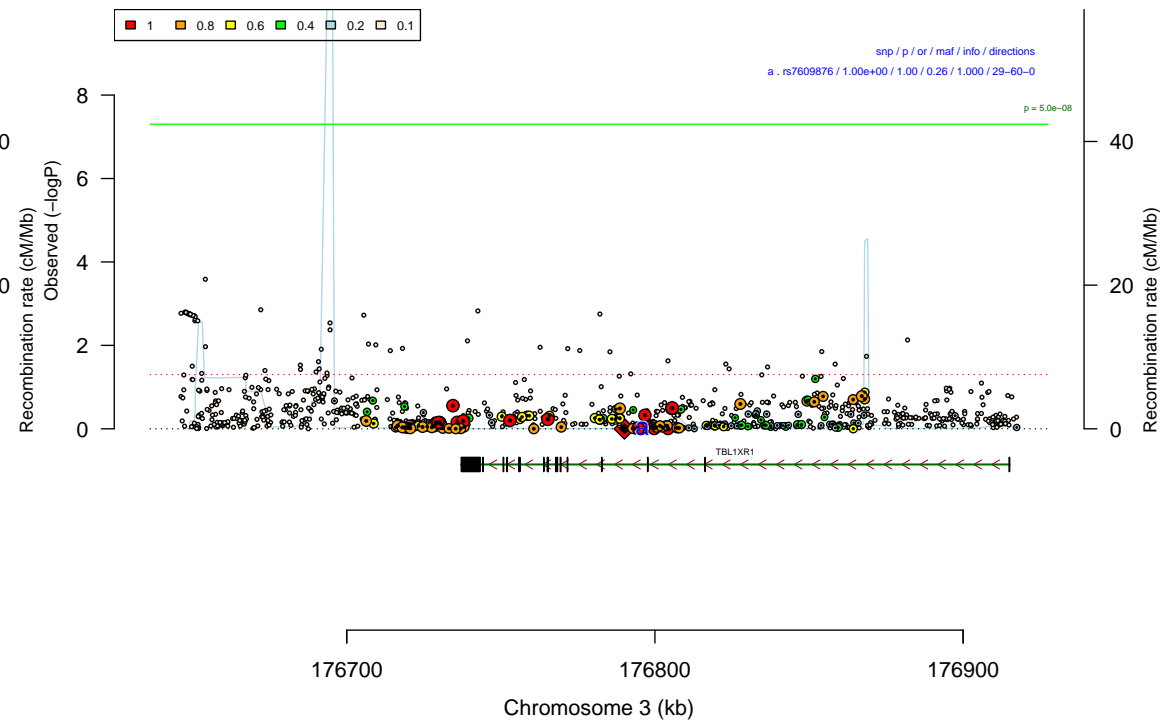

SCZ\_uncond-rs9891739-chr17

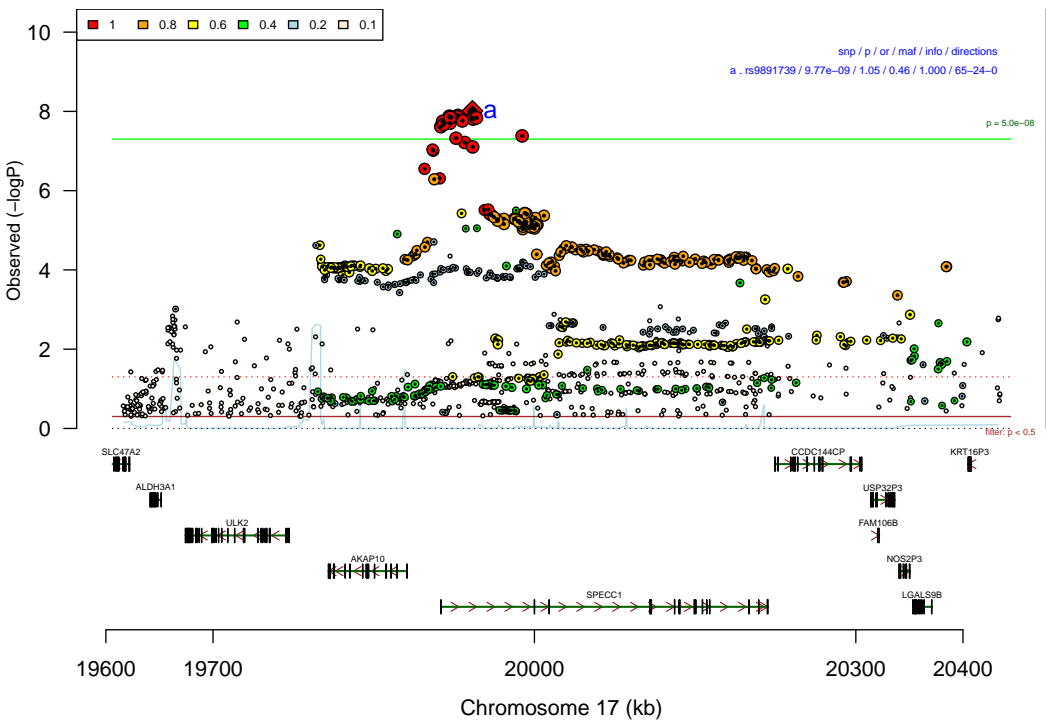

SCZ\_cond-rs9891739-chr17

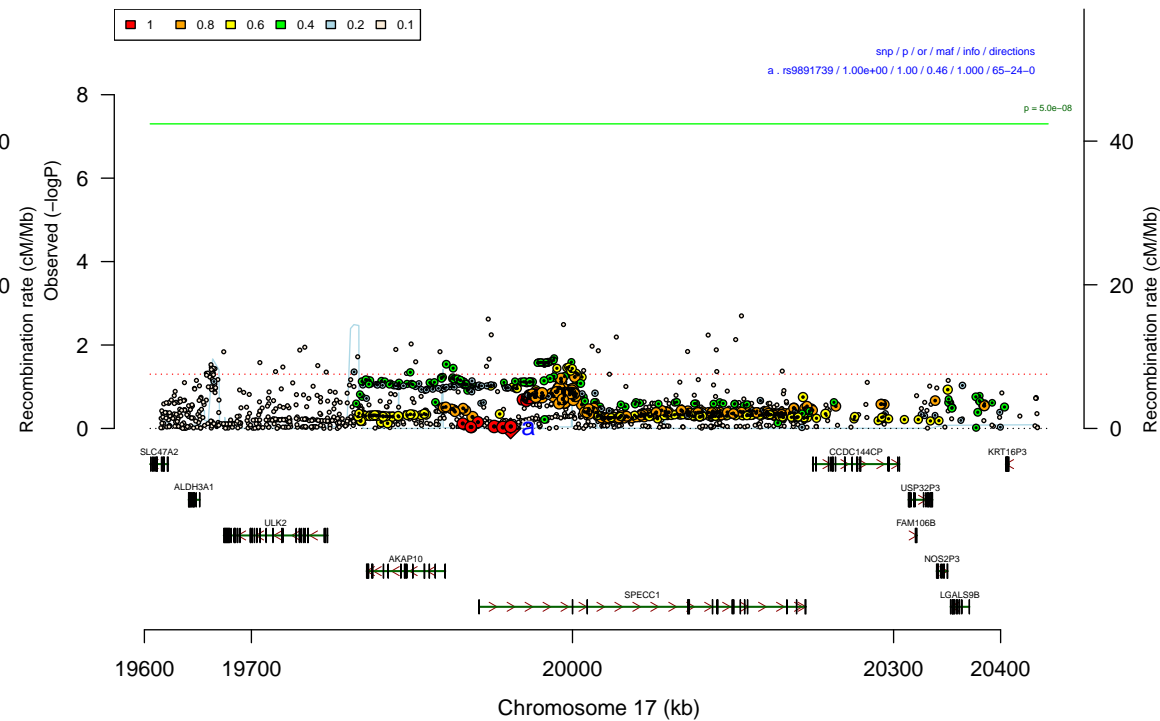

SCZ\_uncond-rs72723227-chr5

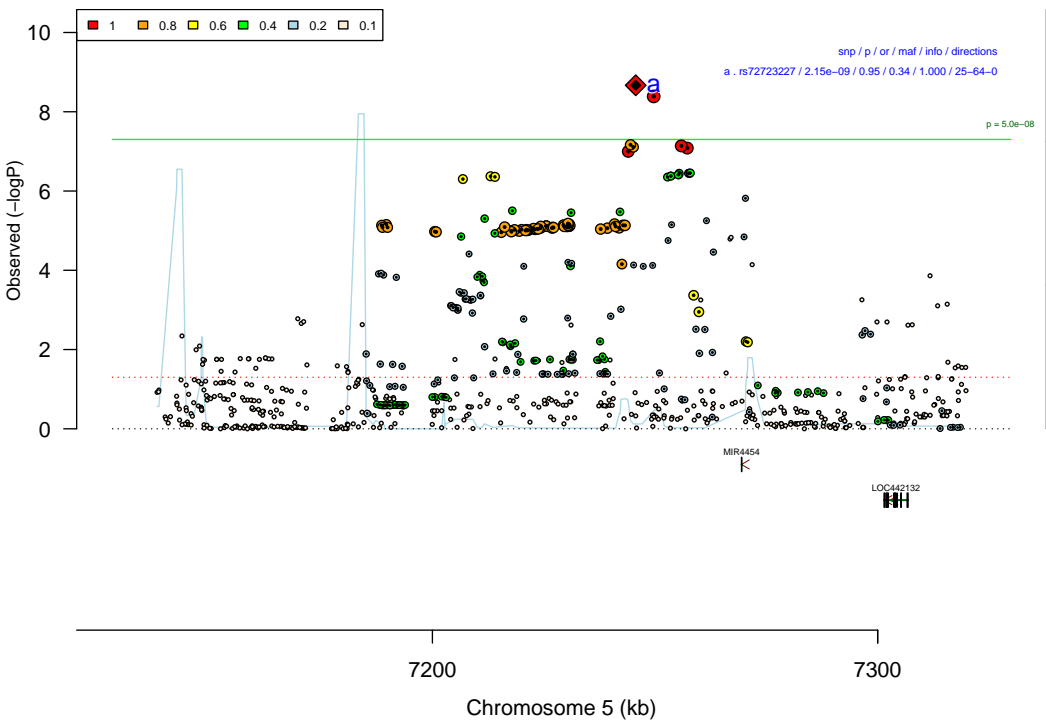

SCZ\_cond-rs72723227-chr5

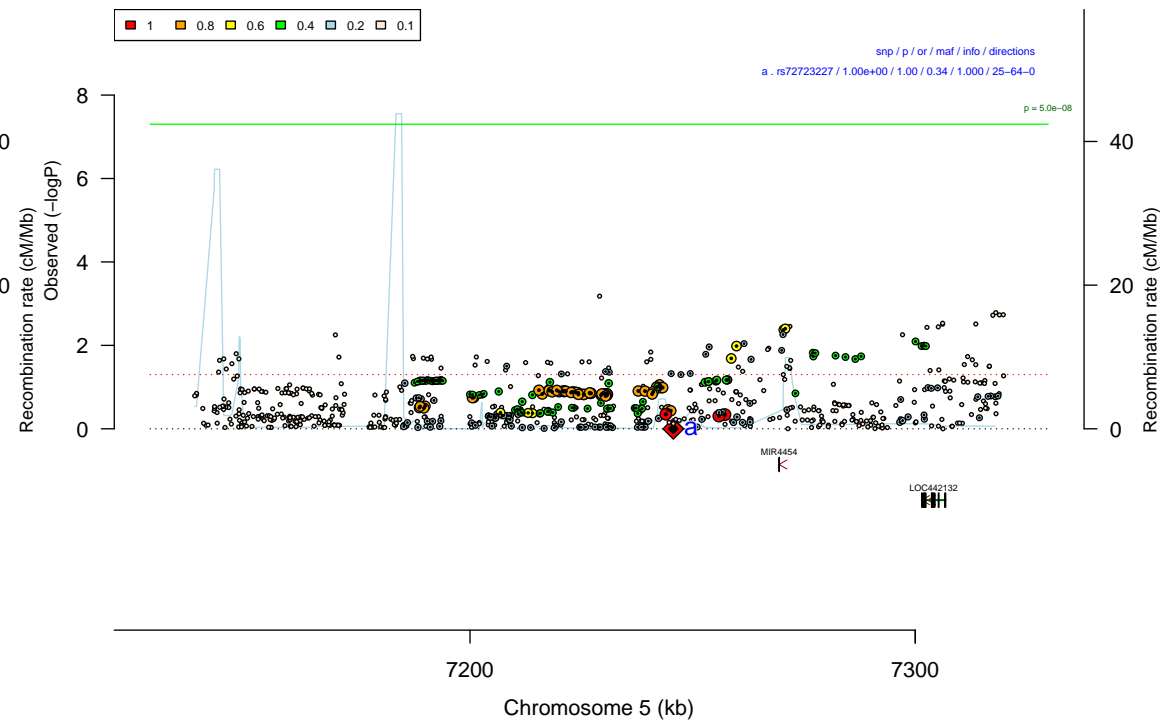

SCZ\_uncond-rs7953300-chr12

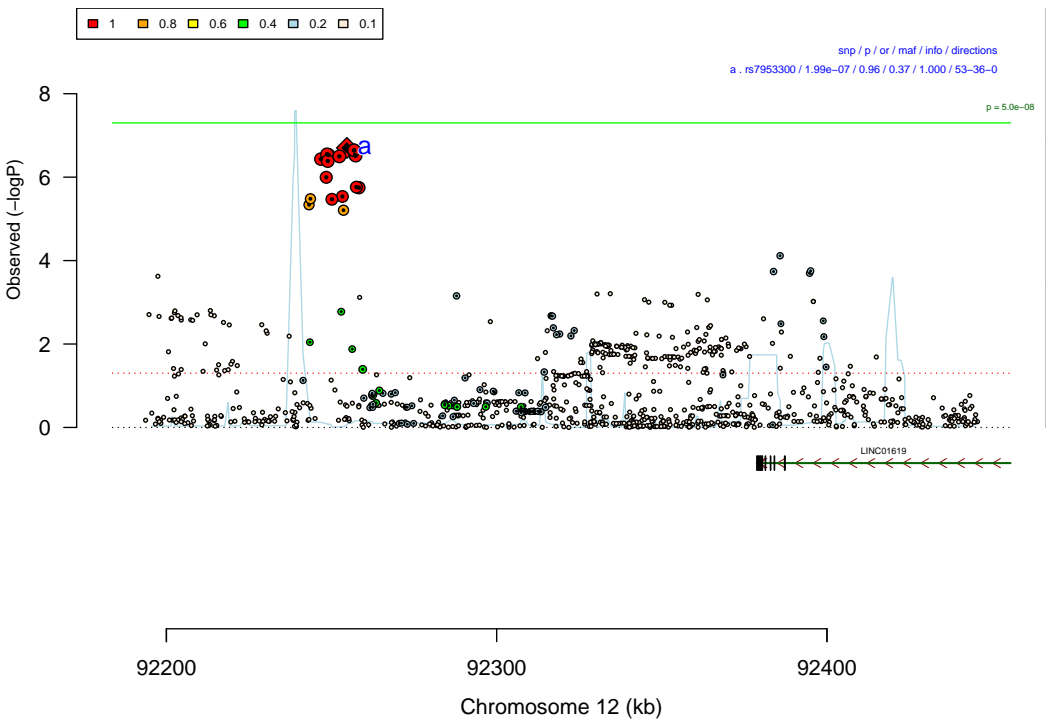

SCZ\_cond-rs7953300-chr12

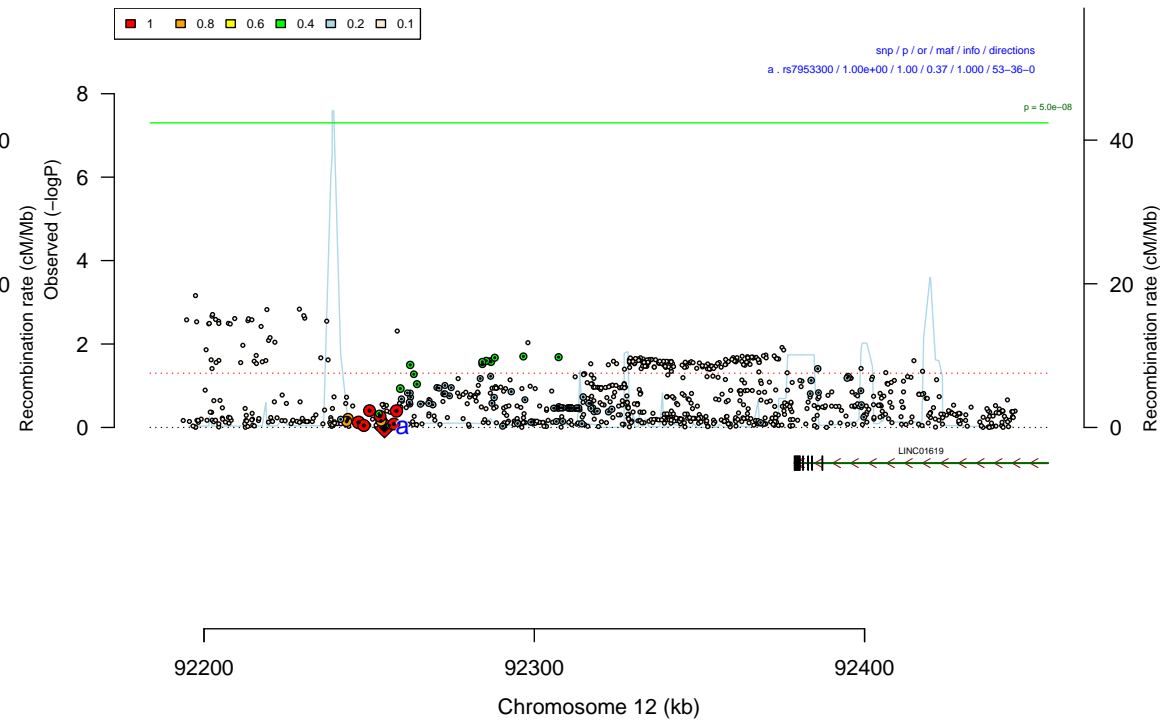

SCZ\_uncond-rs1506297-chr3

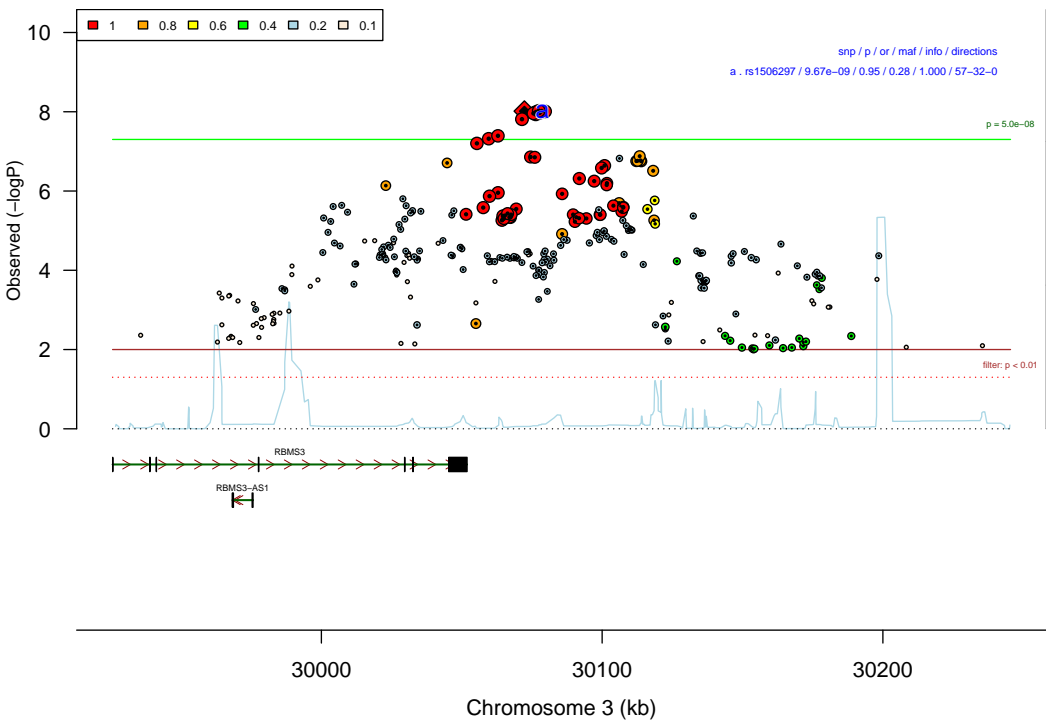

SCZ\_cond-rs1506297-chr3

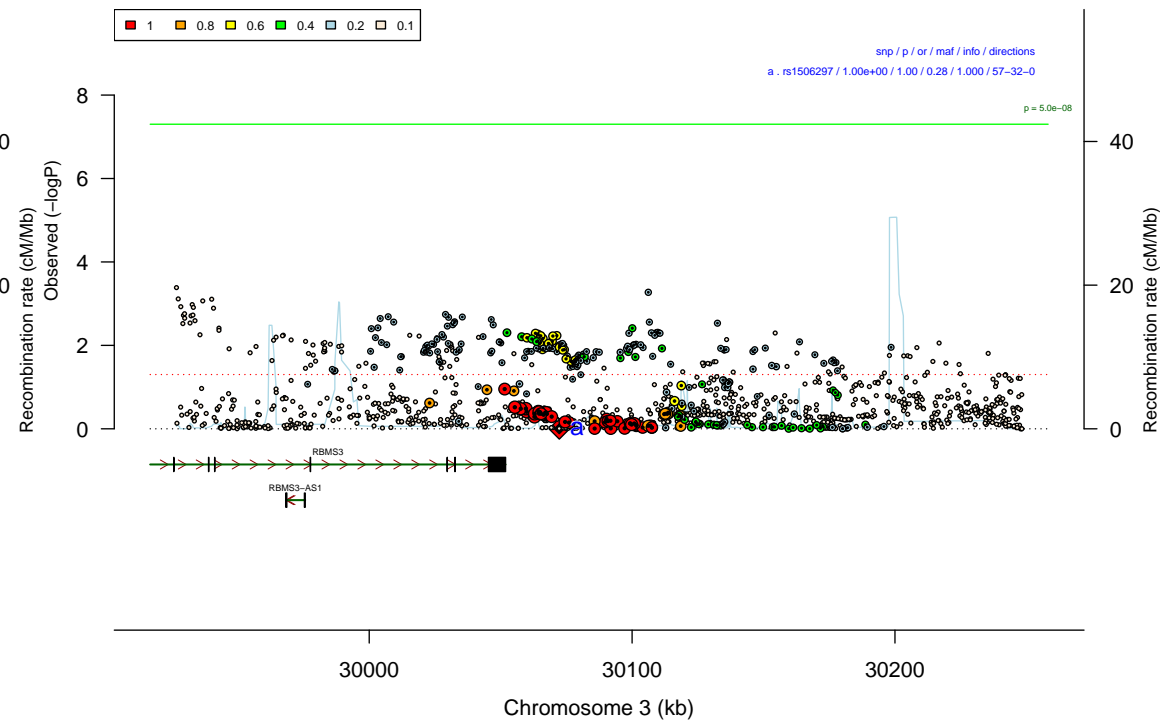

SCZ\_uncond-rs79445414-chr8

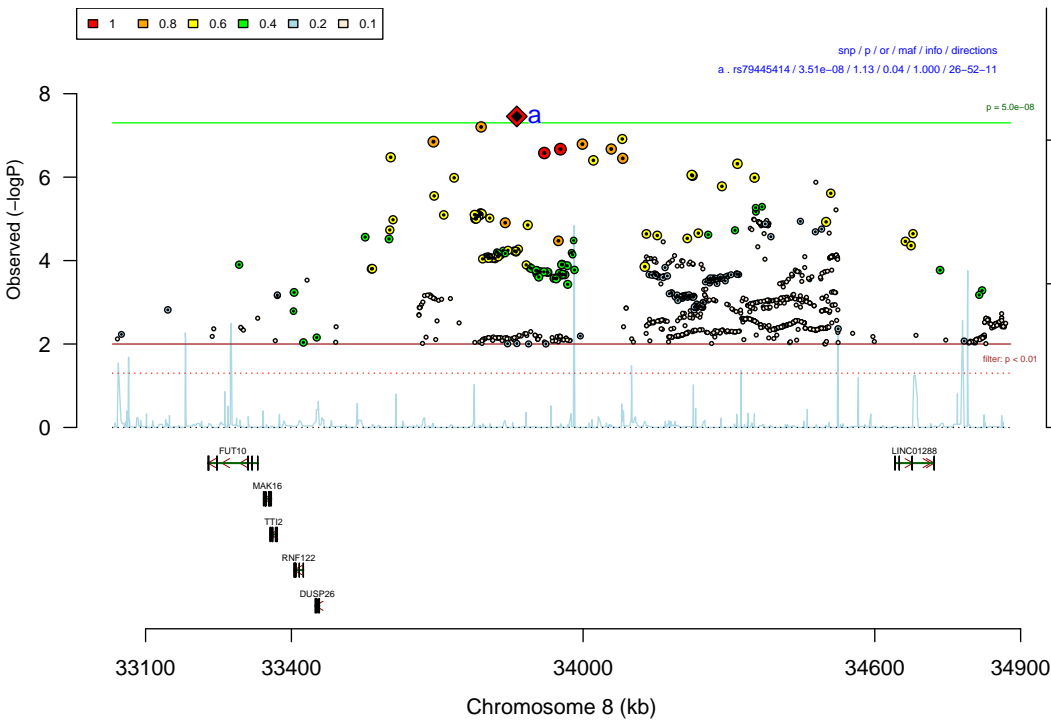

SCZ\_cond-rs79445414-chr8

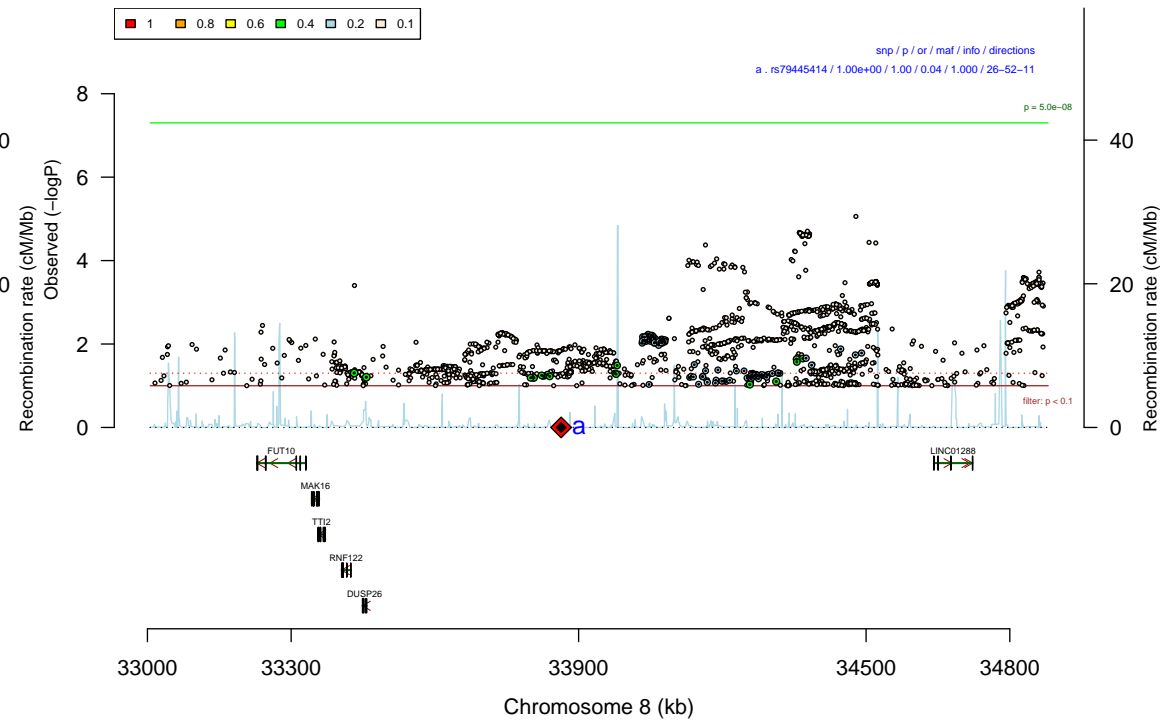

SCZ\_uncond-rs28521069-chr4

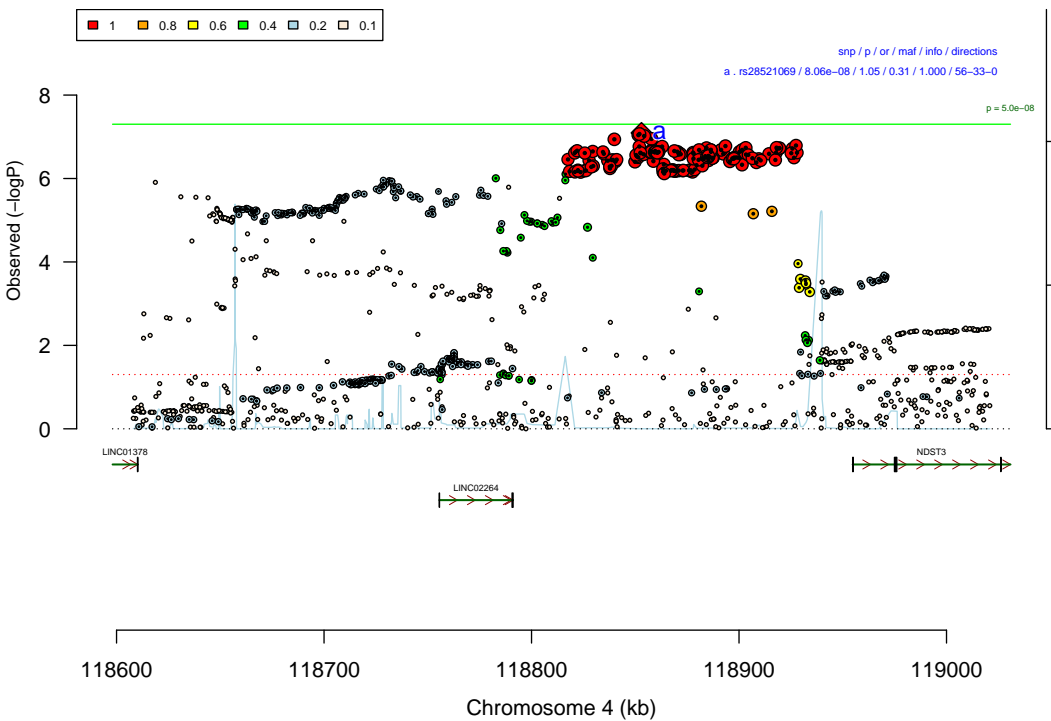

SCZ\_cond-rs28521069-chr4

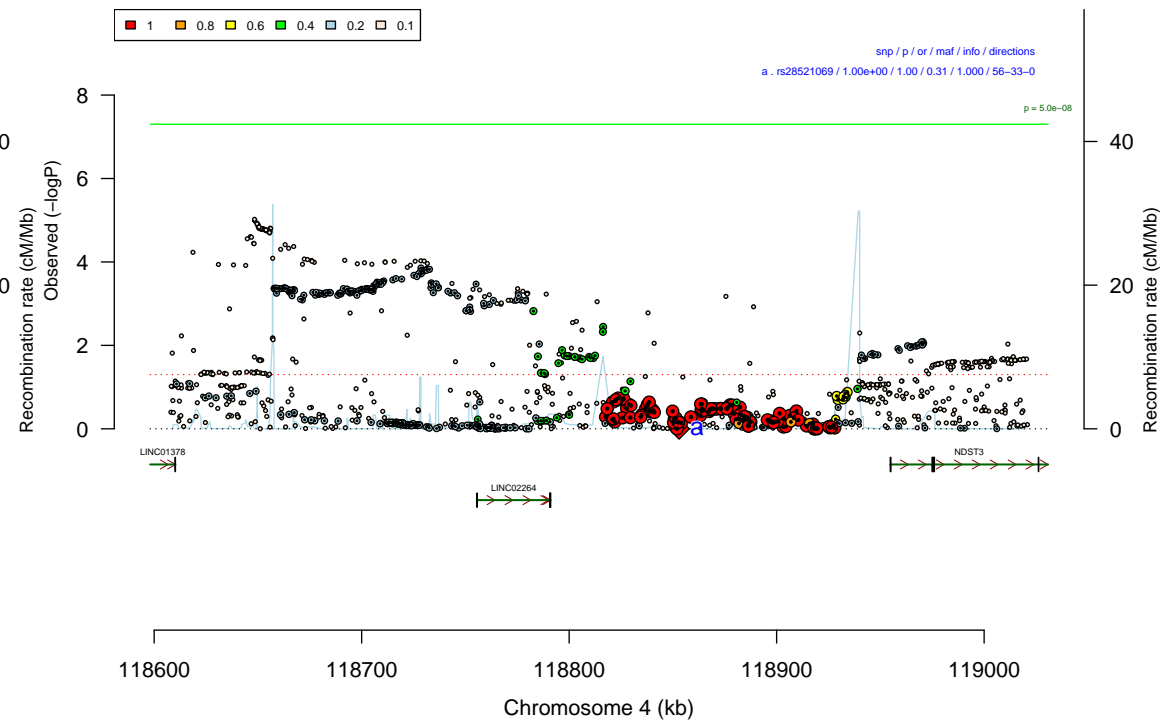



SCZ\_uncond-rs35045093-chr7

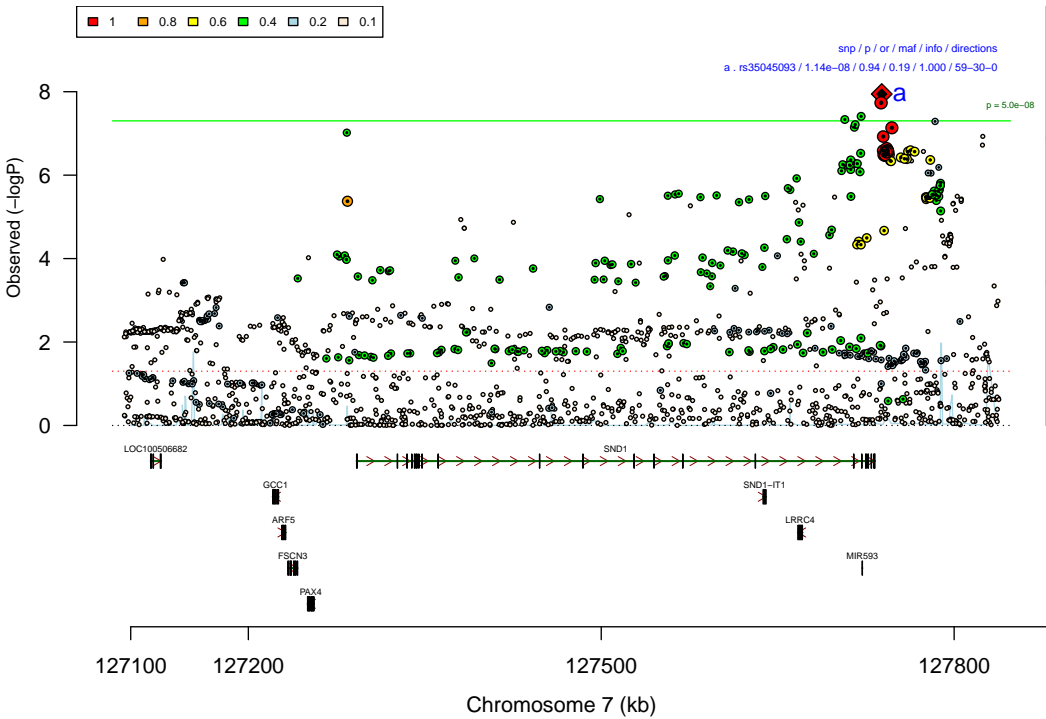

SCZ\_cond-rs35045093-chr7

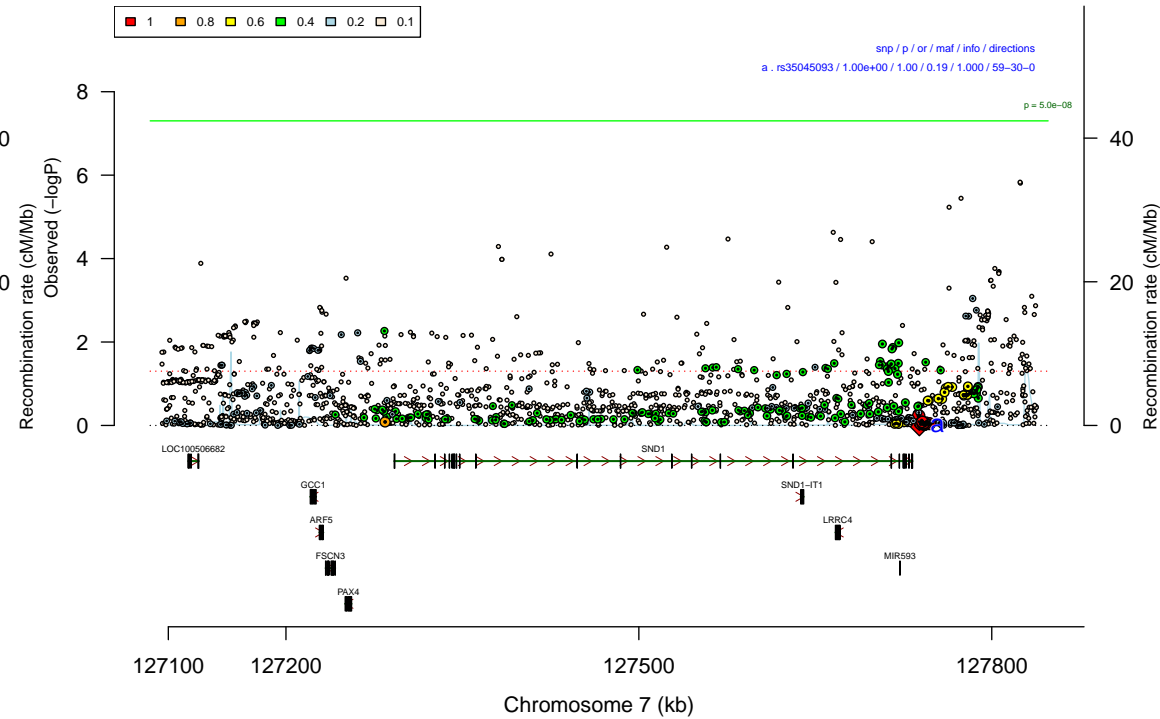

SCZ\_uncond-rs1901512-chr5

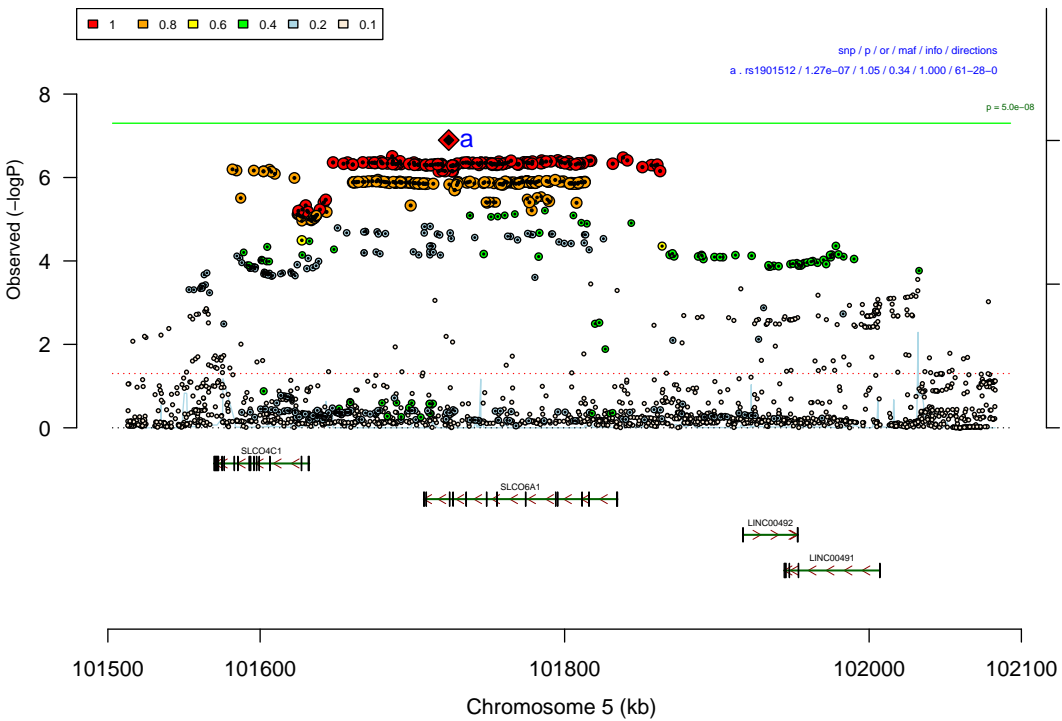

SCZ\_cond-rs1901512-chr5

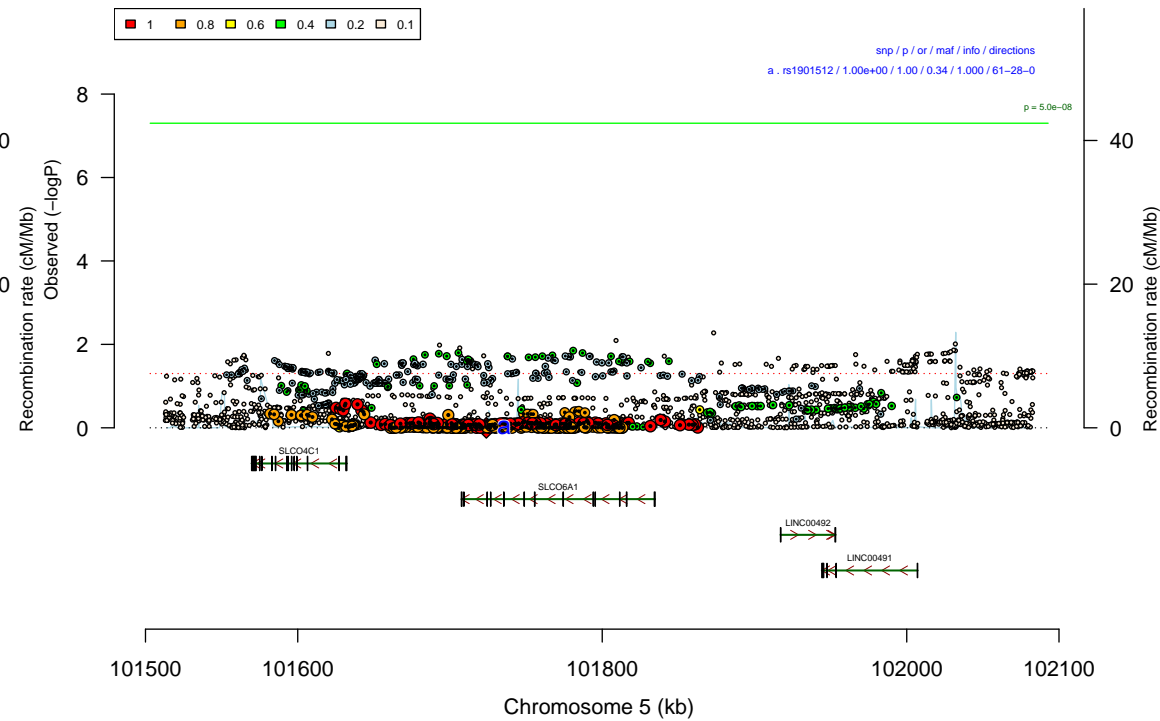

SCZ\_uncond-rs7699241-chr4

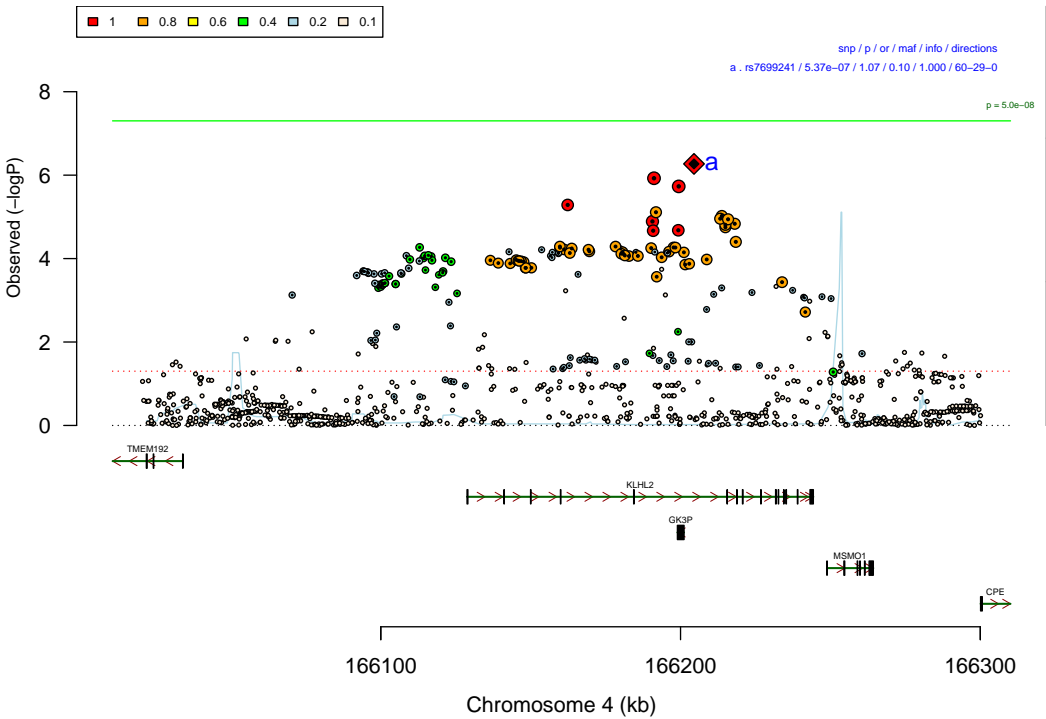

SCZ\_cond-rs7699241-chr4

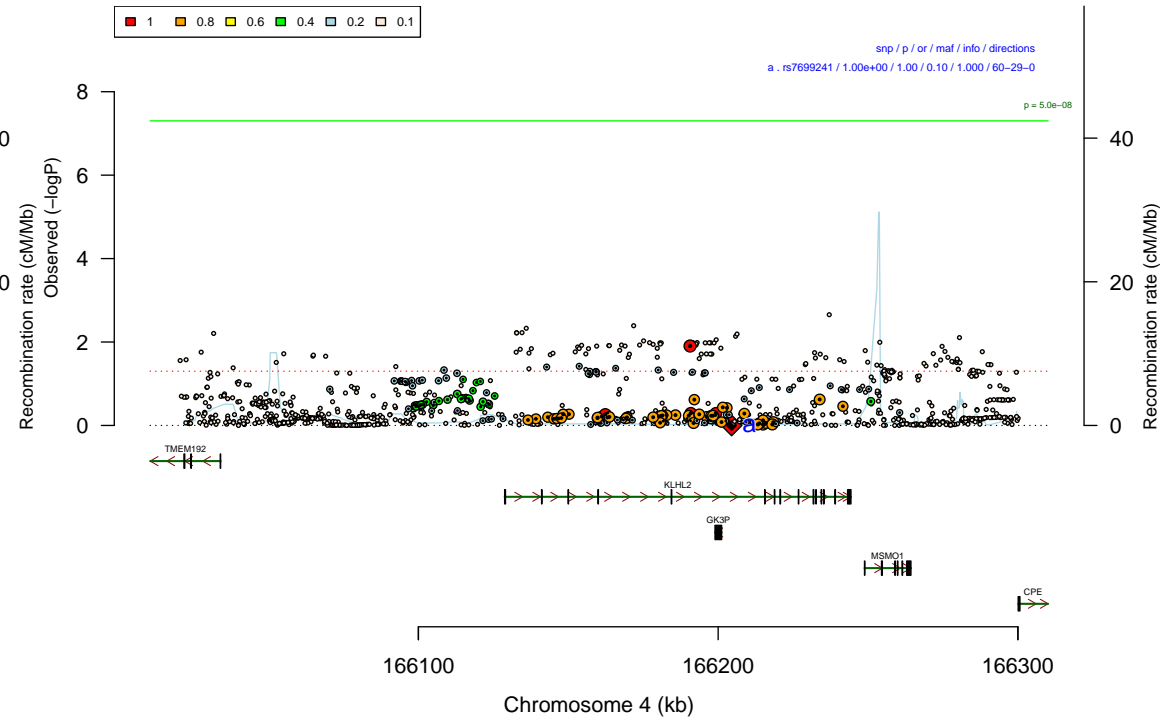

SCZ\_uncond-rs1126057-chr5

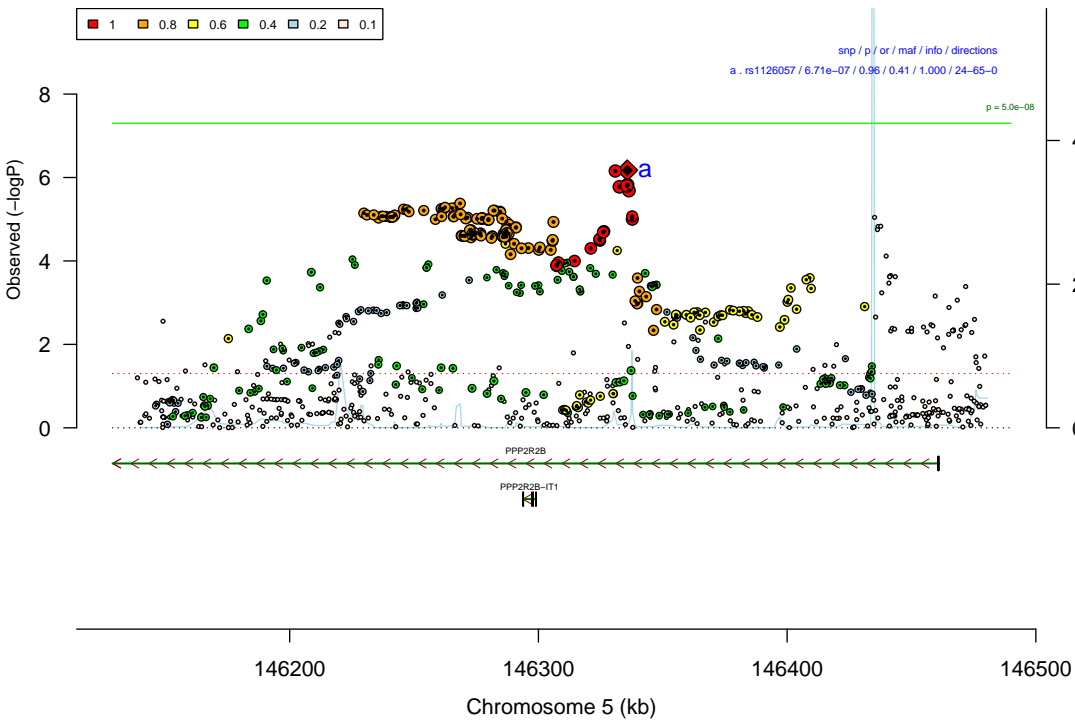

SCZ\_cond-rs1126057-chr5

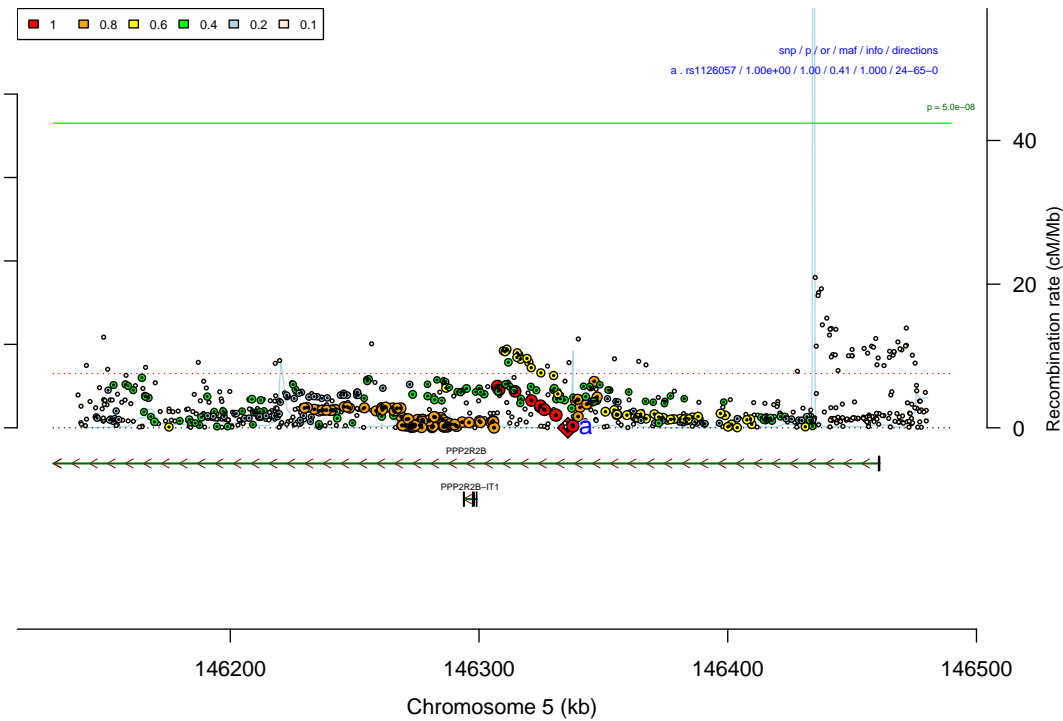

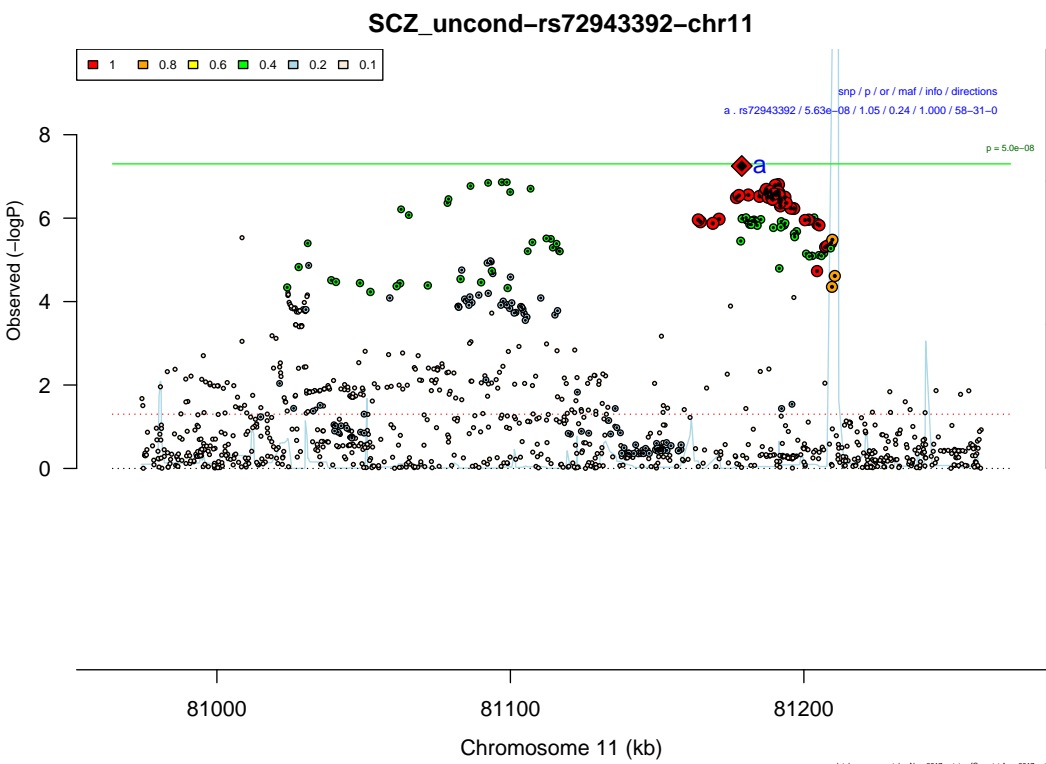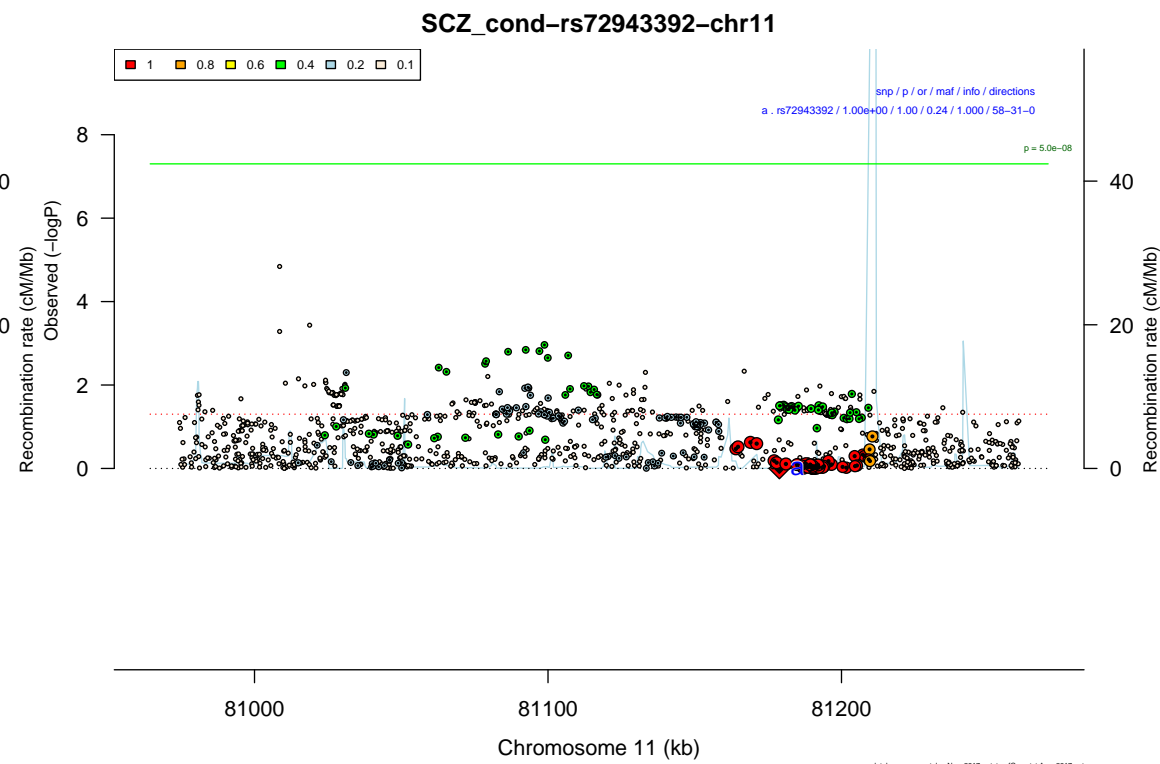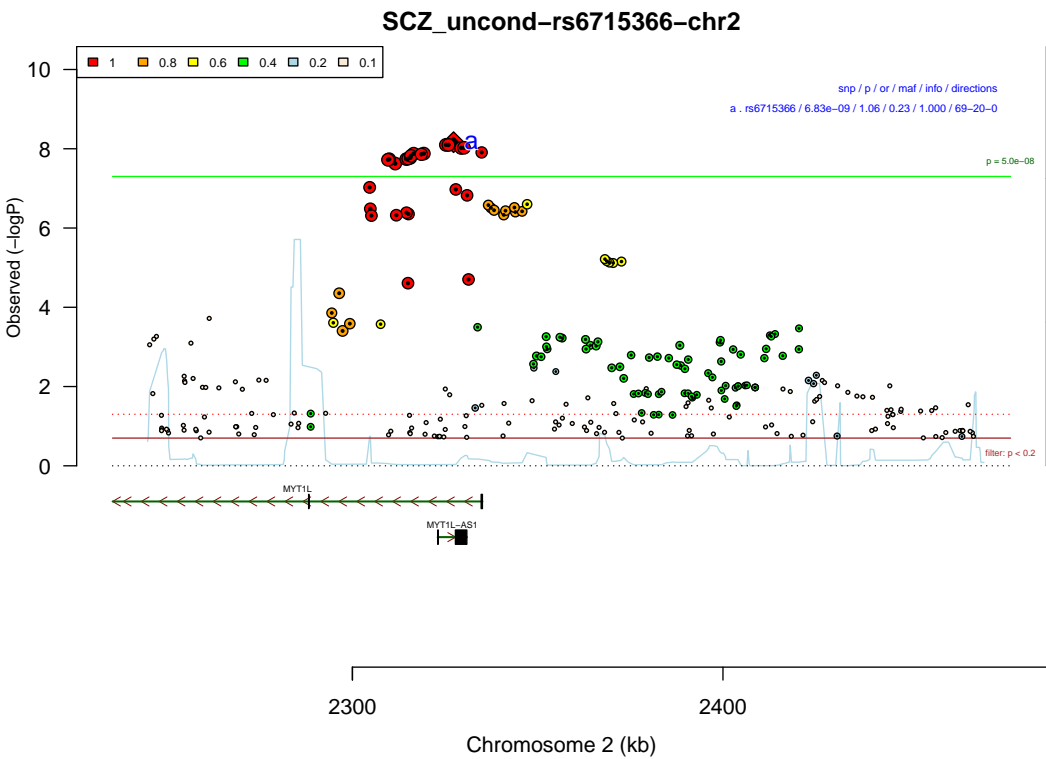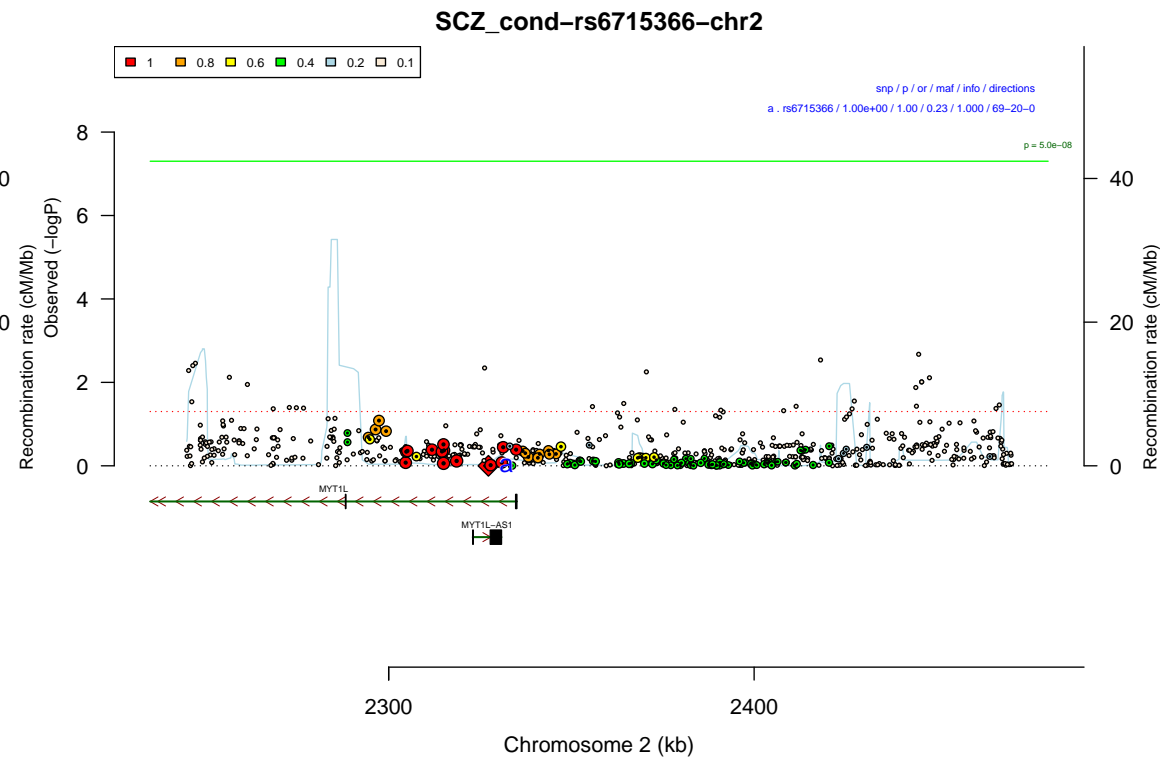

SCZ\_uncond-rs6925079-chr6

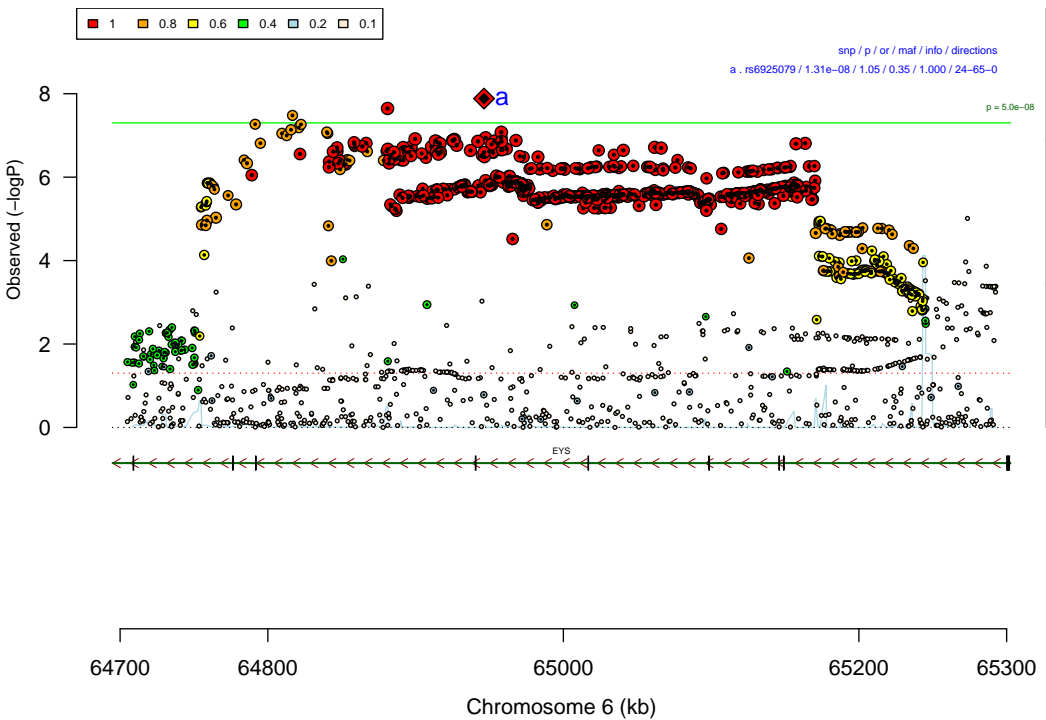

SCZ\_cond-rs6925079-chr6

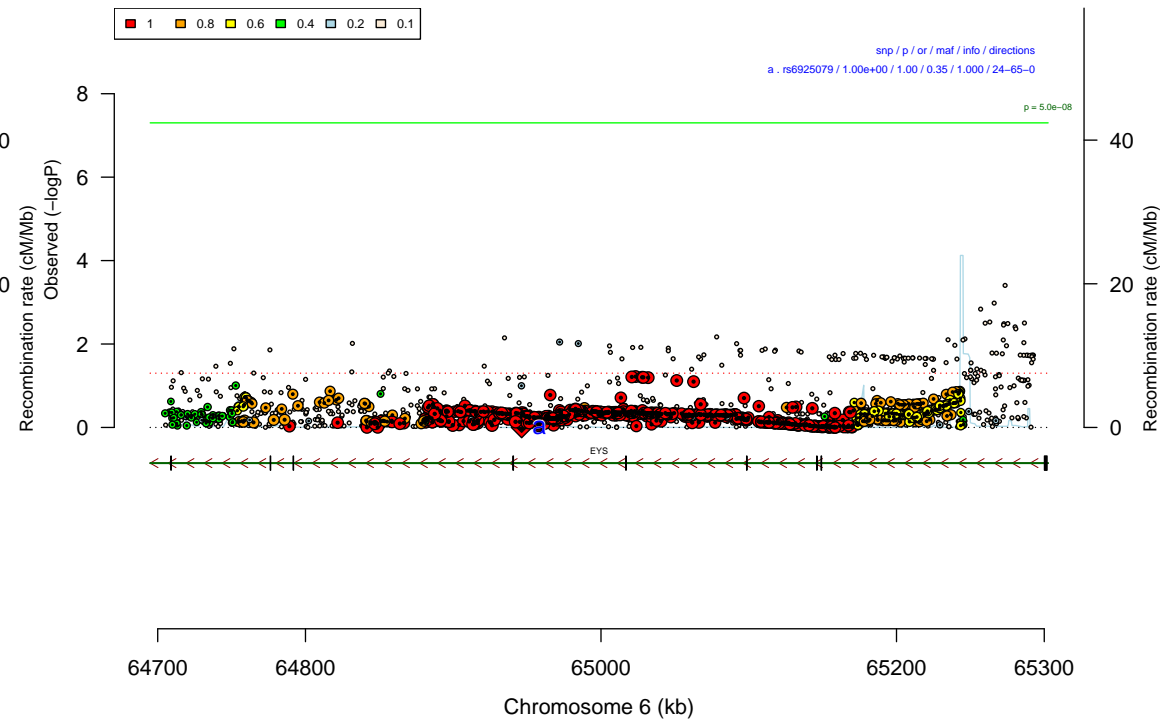

SCZ\_uncond-rs3900555-chr1

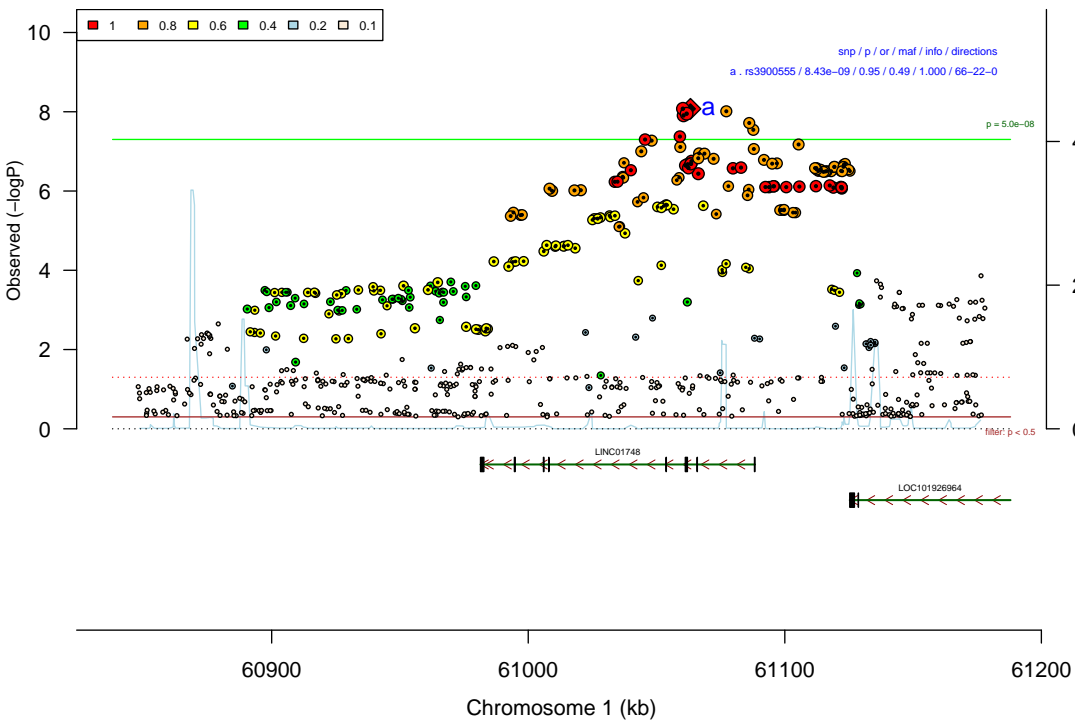

SCZ\_cond-rs3900555-chr1

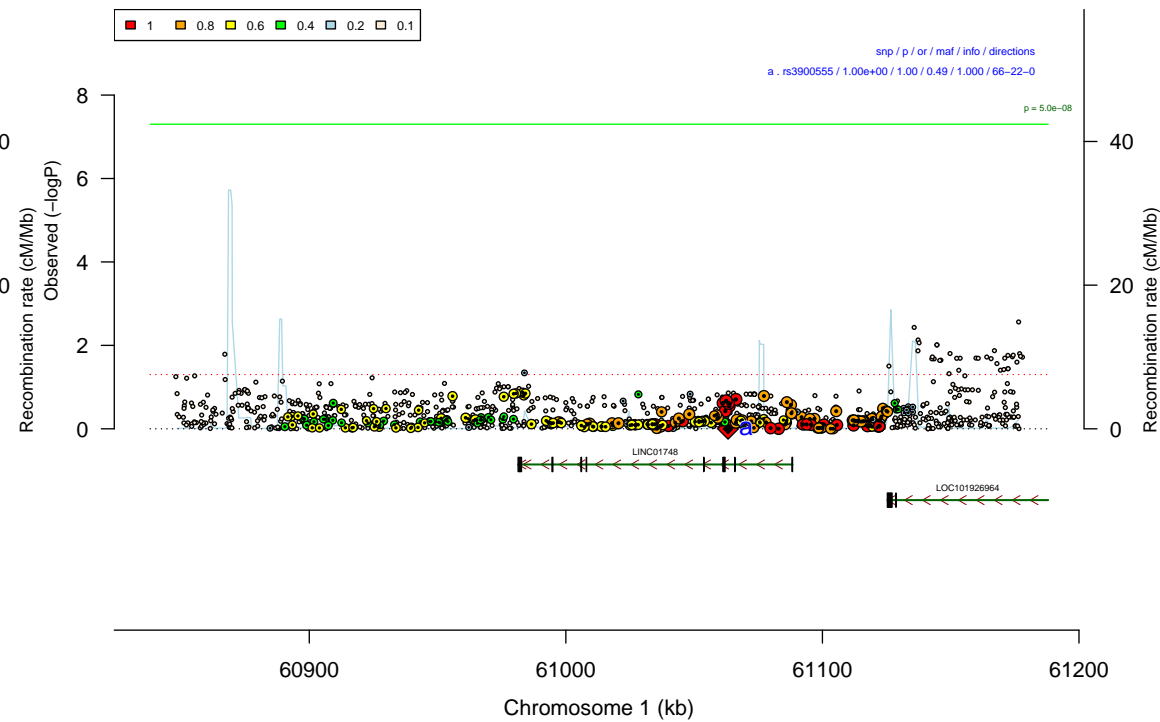

SCZ\_uncond-rs61786047-chr1

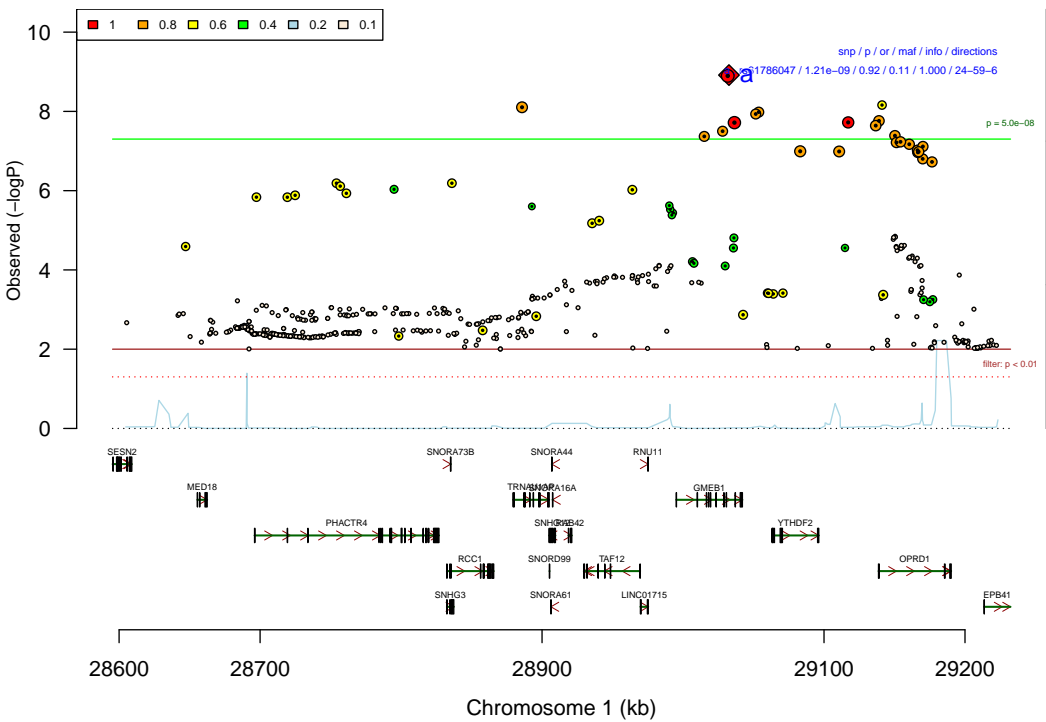

SCZ\_cond-rs61786047-chr1

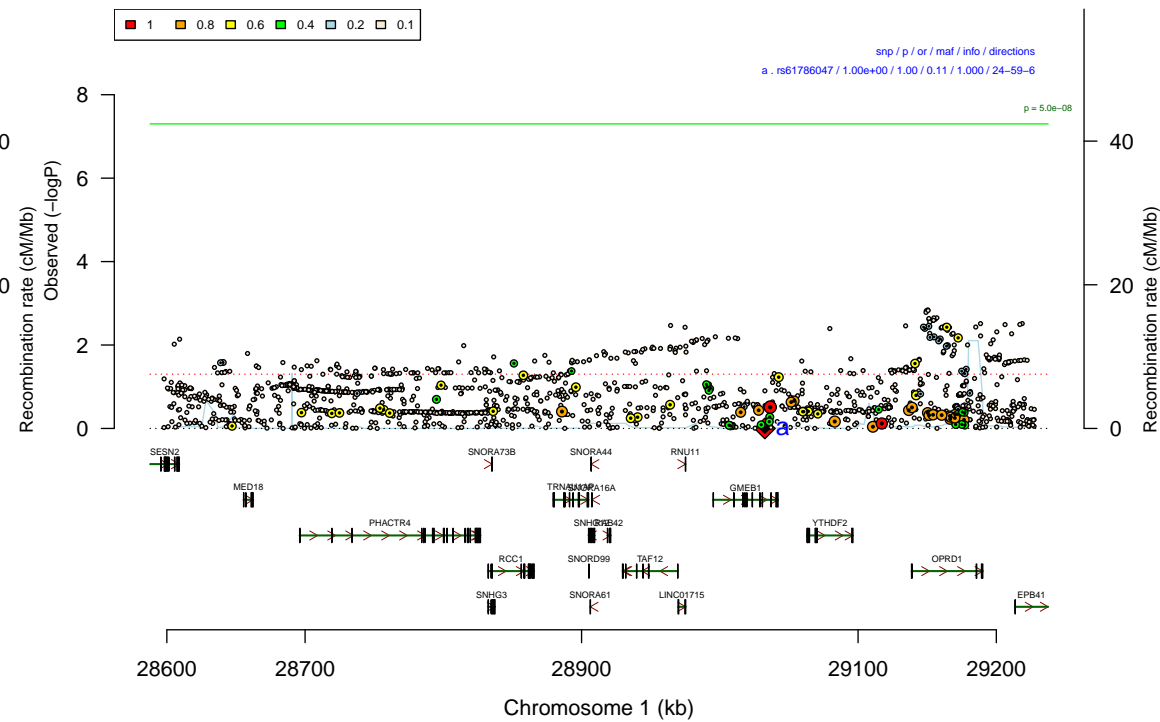

SCZ\_uncond-rs6478858-chr9

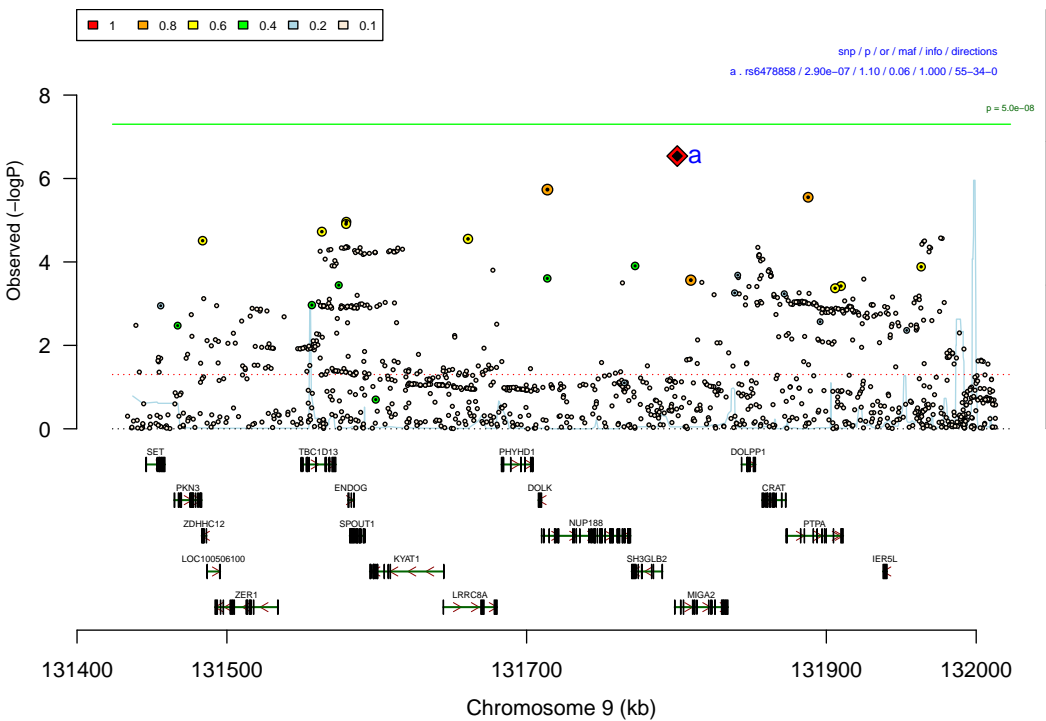

SCZ\_cond-rs6478858-chr9

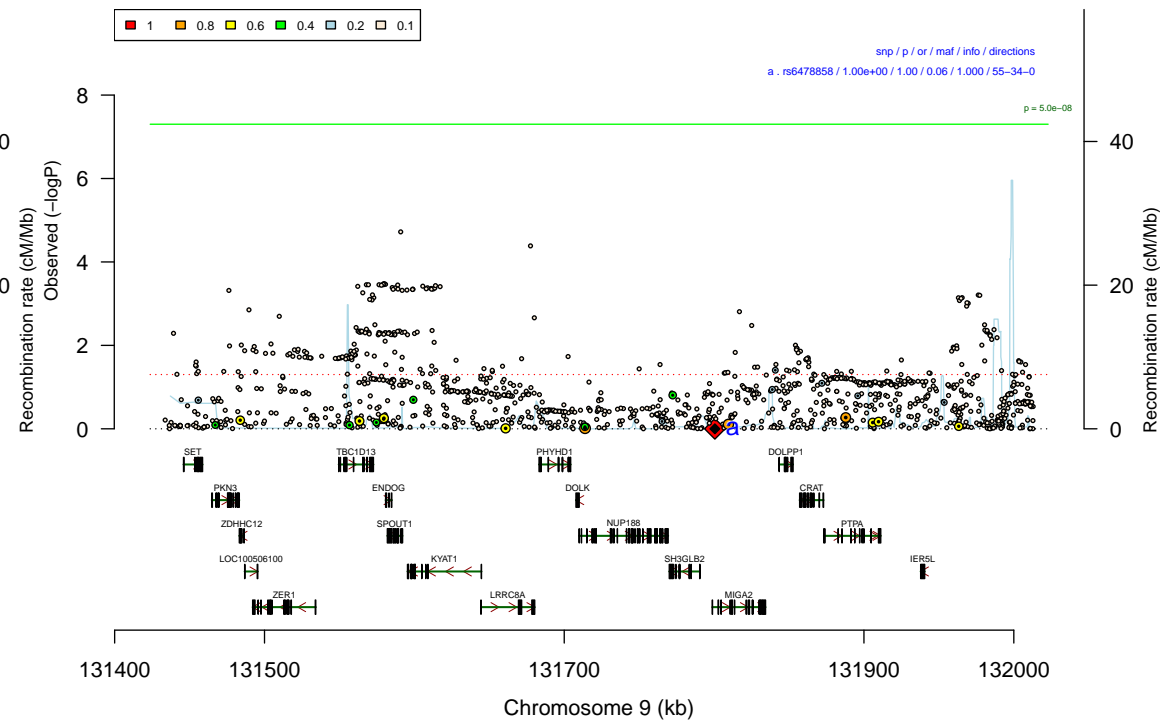

SCZ\_uncond-rs11972718-chr7

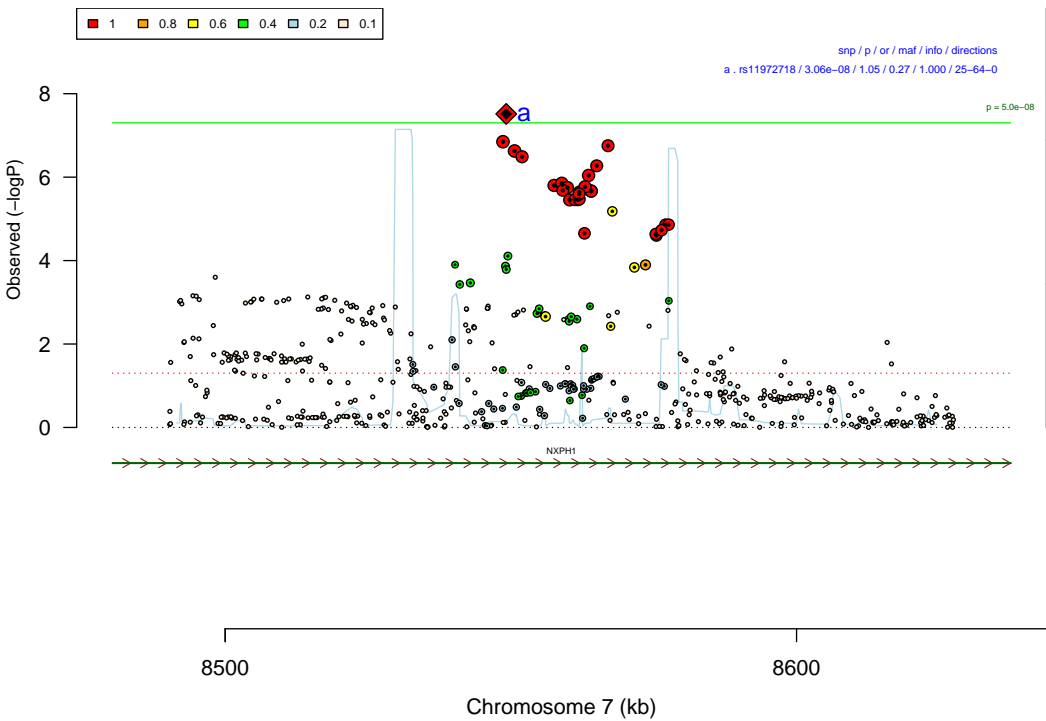

SCZ\_cond-rs11972718-chr7

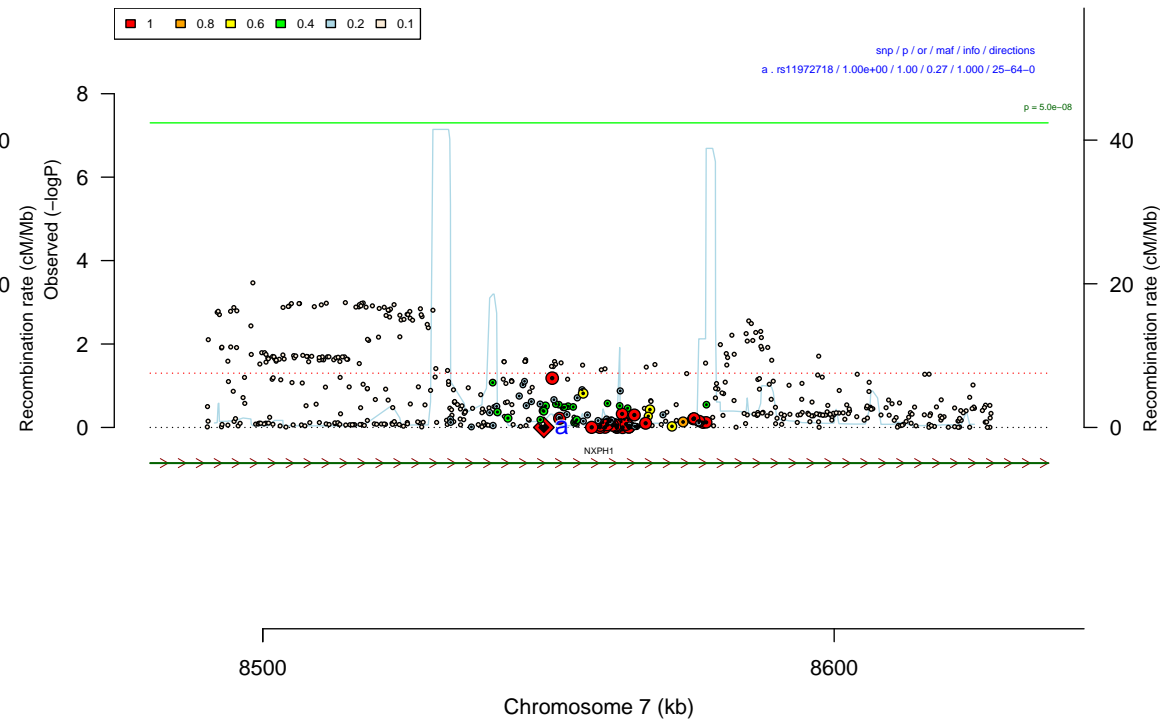

SCZ\_uncond-rs41314284-chr1

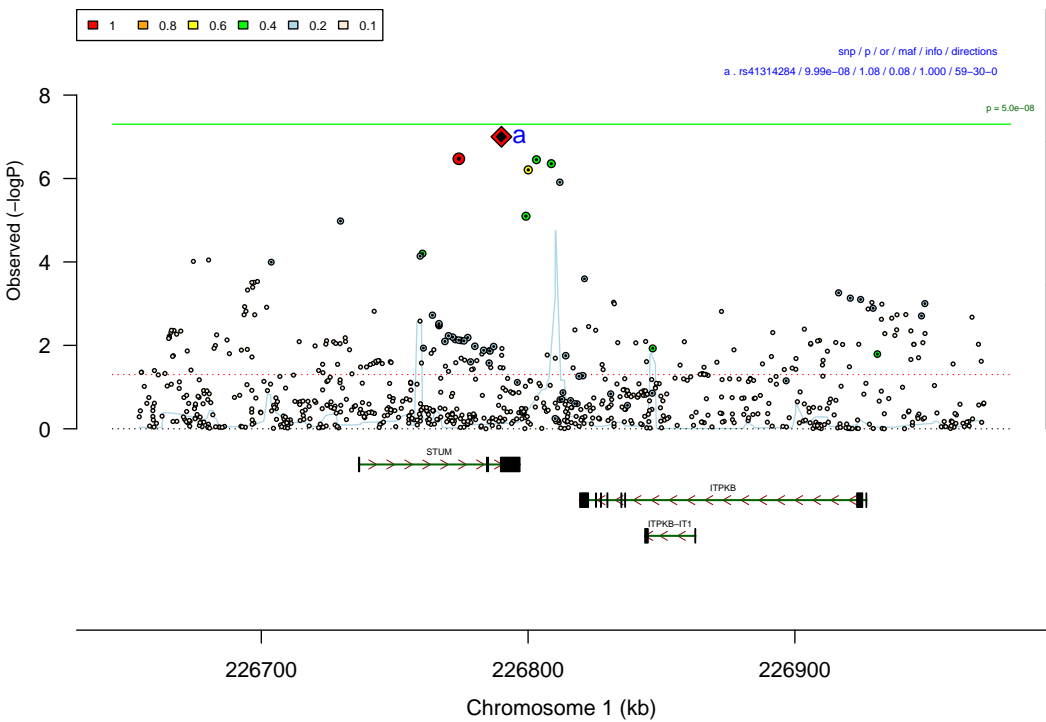

SCZ\_cond-rs41314284-chr1

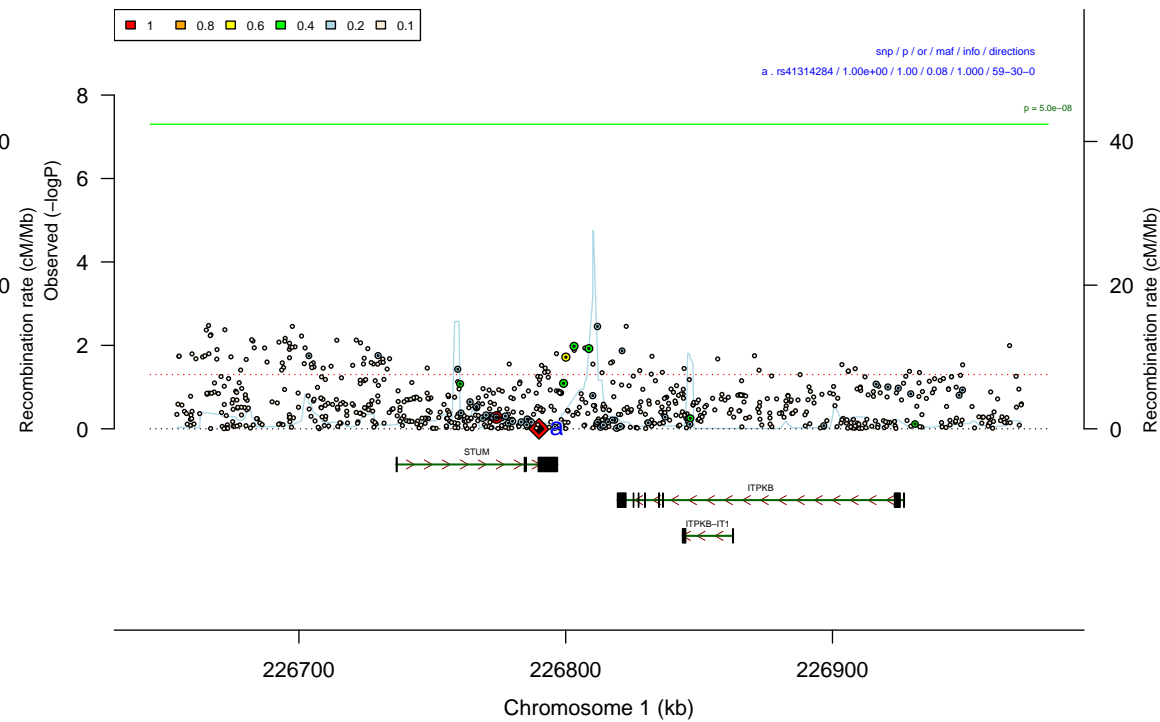

SCZ\_uncond-rs9454727-chr6

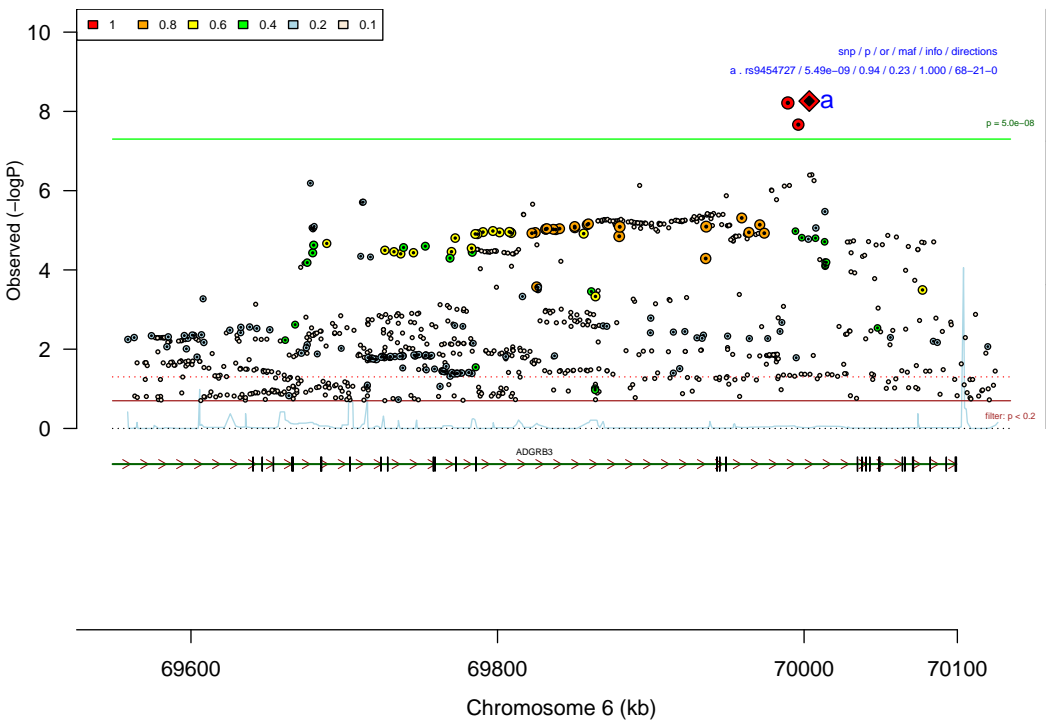

SCZ\_cond-rs9454727-chr6

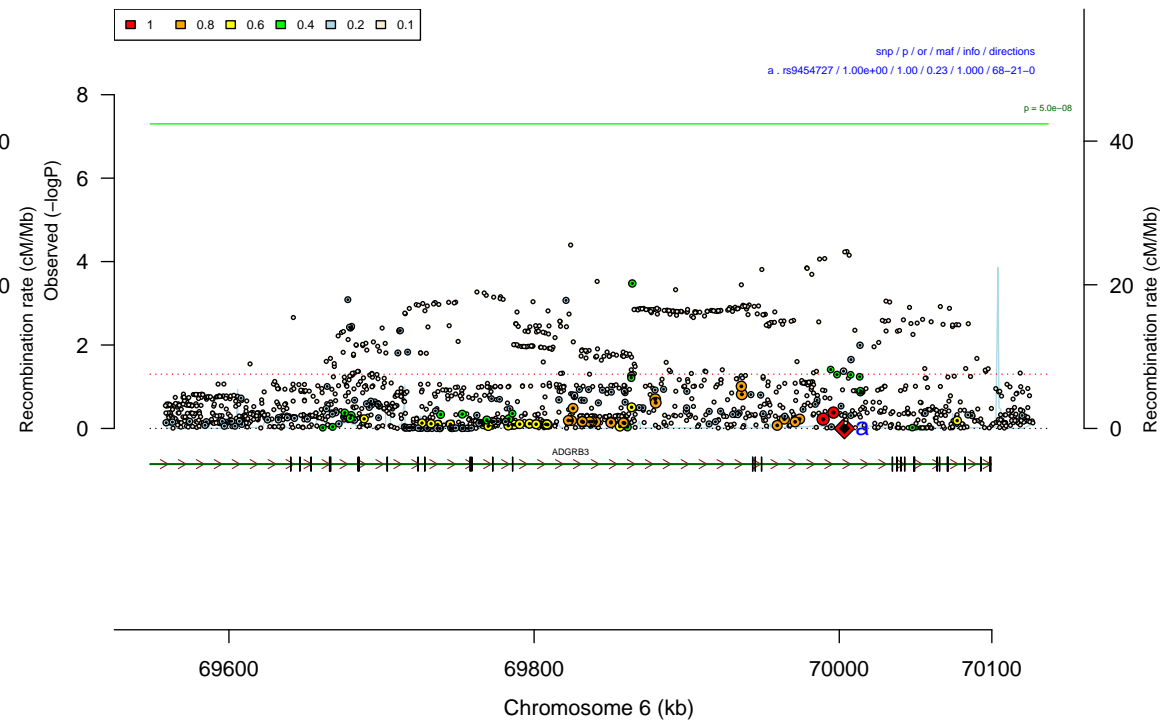

SCZ\_uncond-rs10777187-chr12

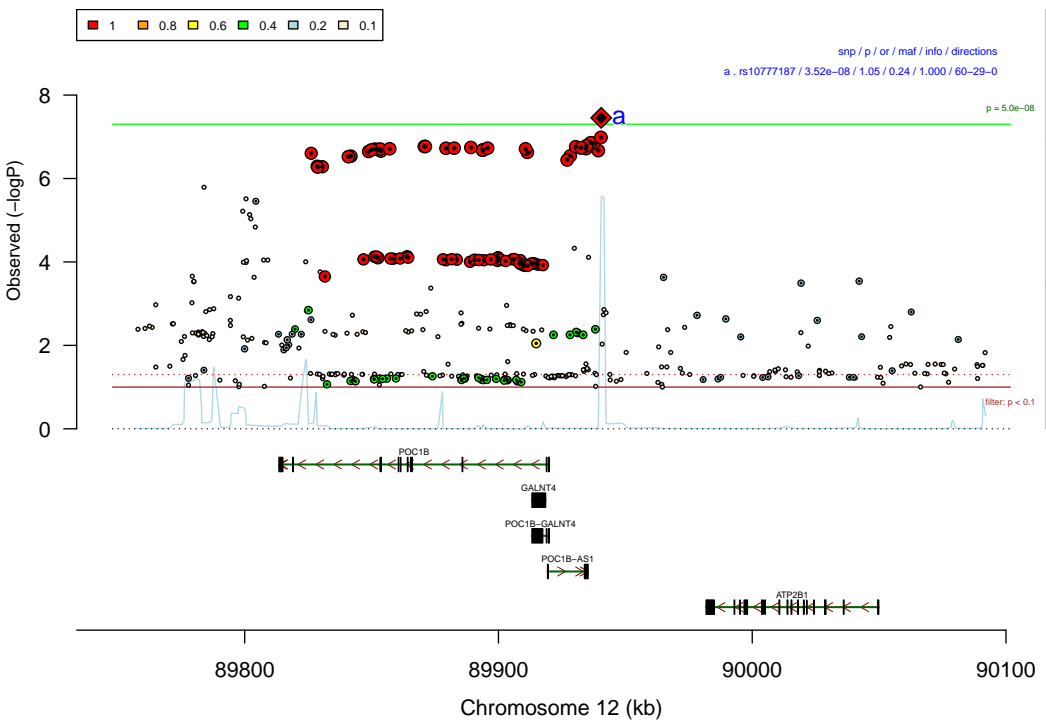

SCZ\_cond-rs10777187-chr12

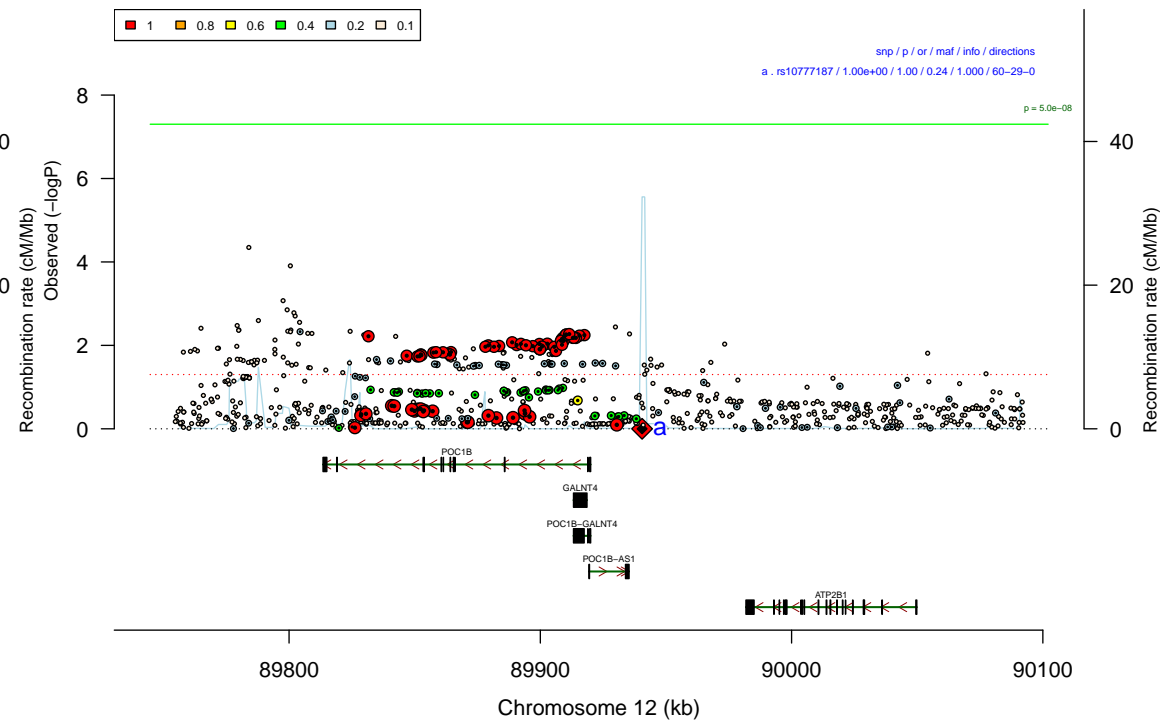



SCZ\_uncond-rs7133857-chr12

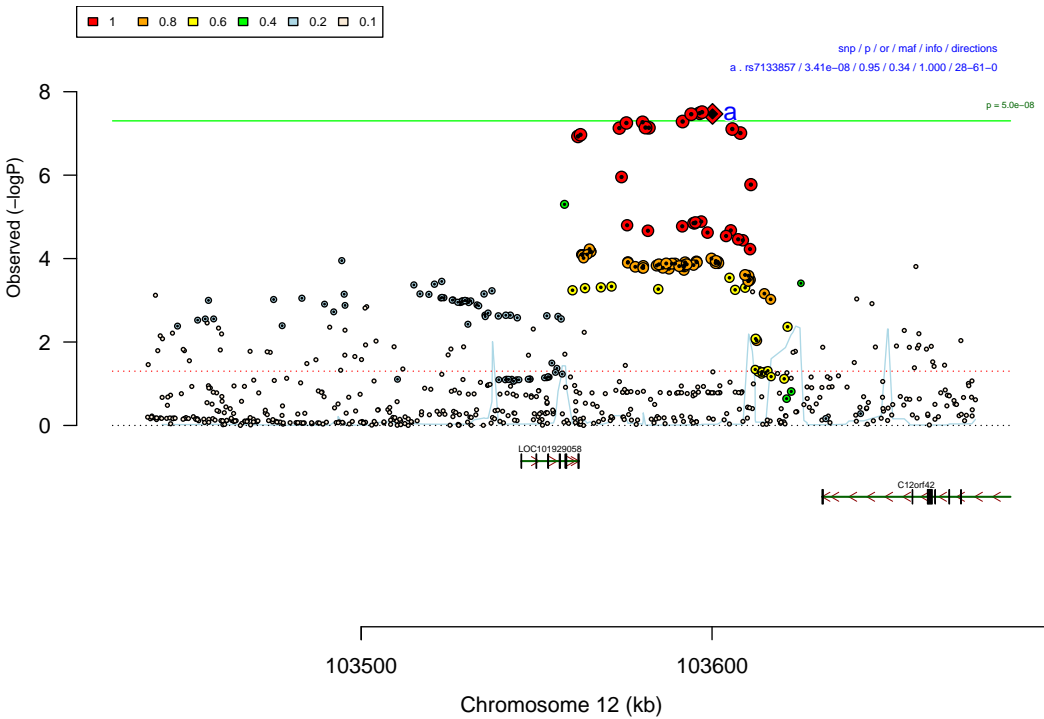

SCZ\_cond-rs7133857-chr12

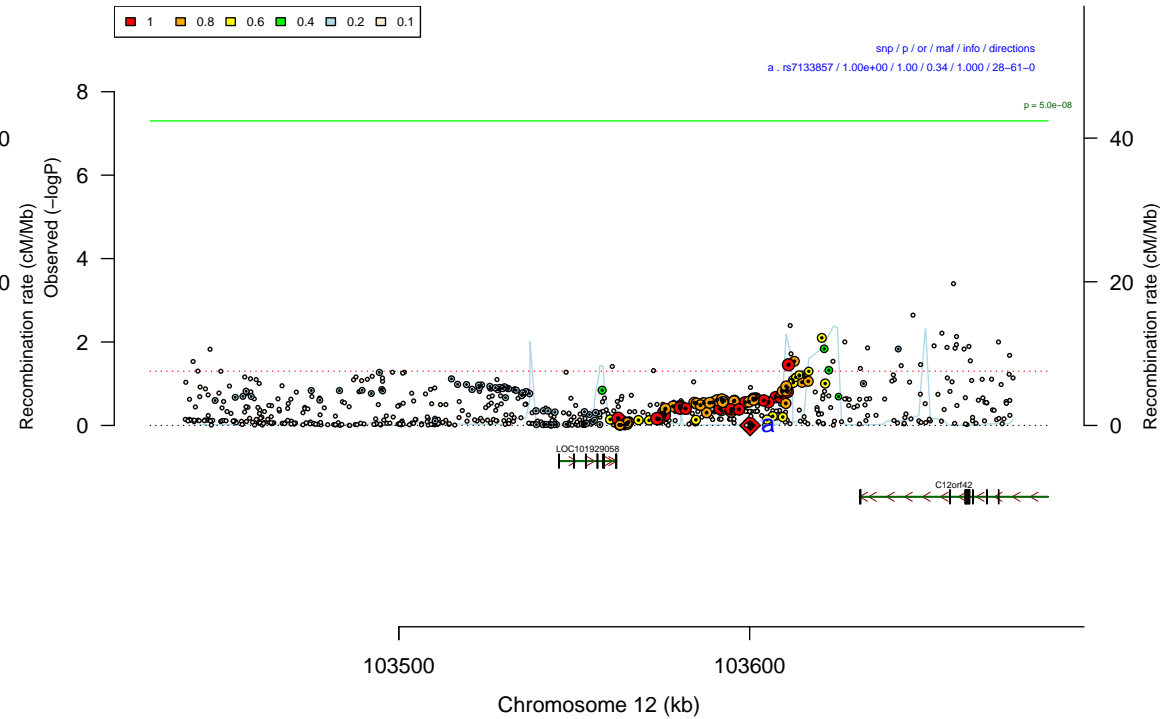

SCZ\_uncond-rs12126806-chr1

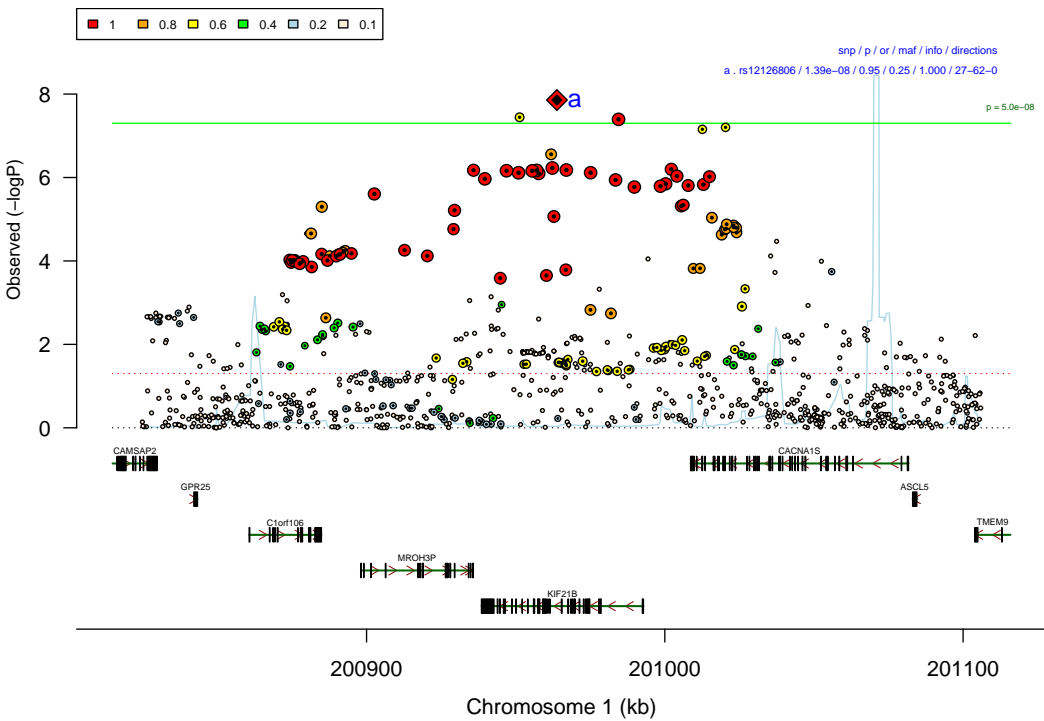

SCZ\_cond-rs12126806-chr1

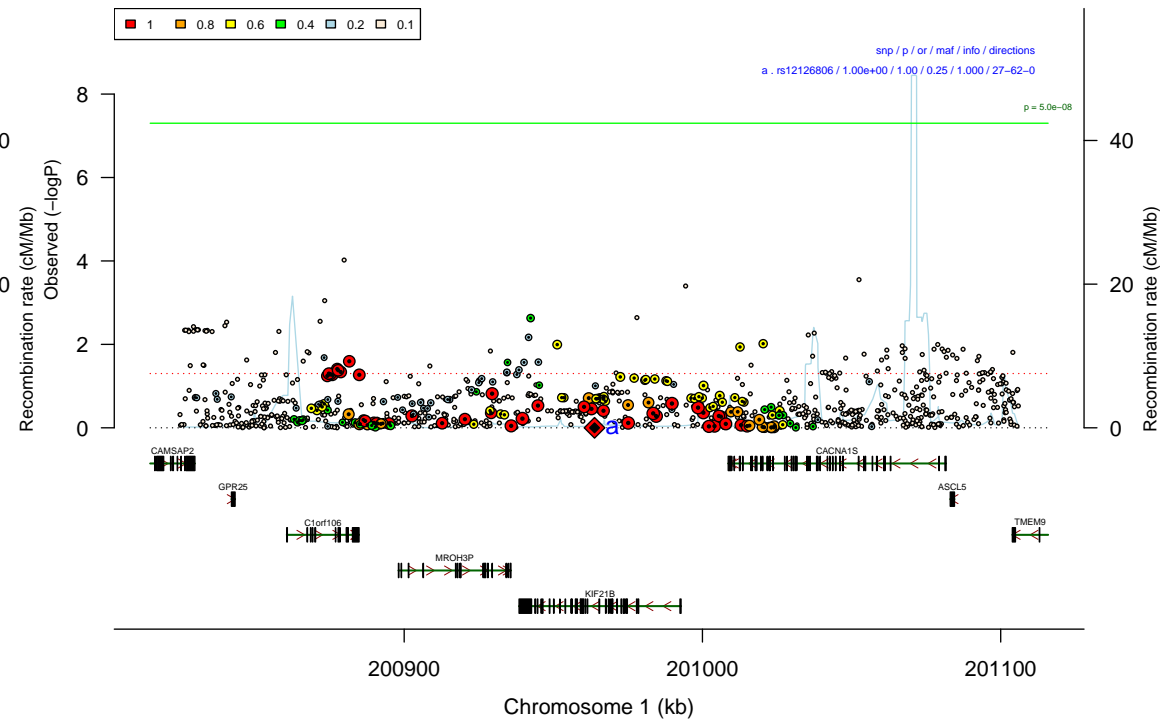



SCZ\_uncond-rs6925964-chr6

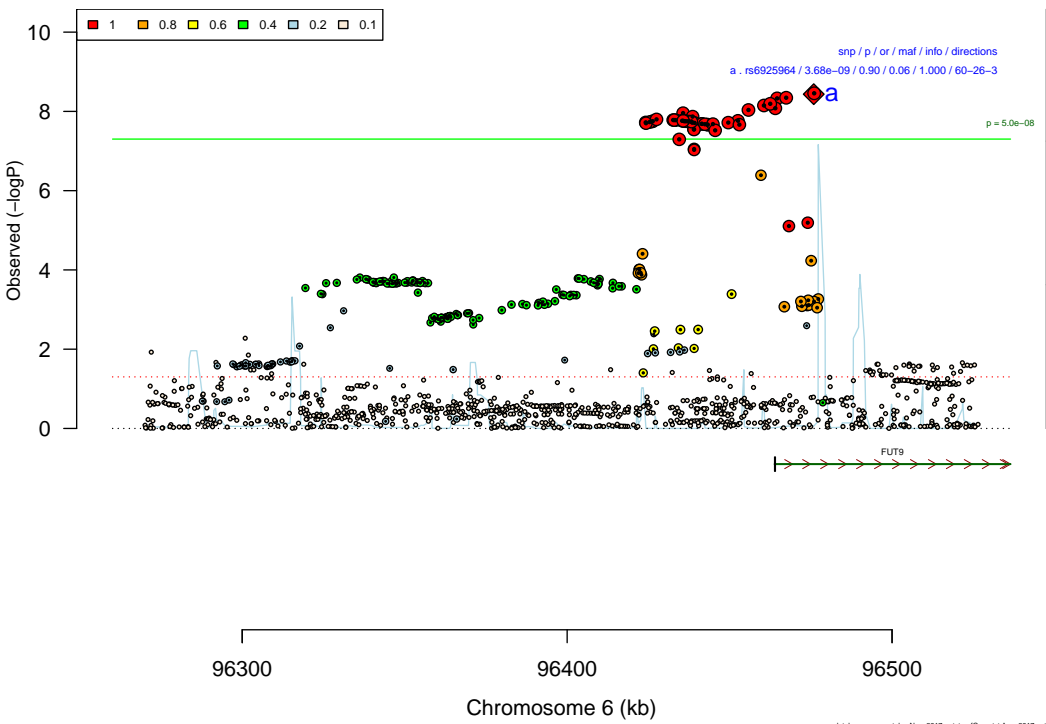

SCZ\_cond-rs6925964-chr6

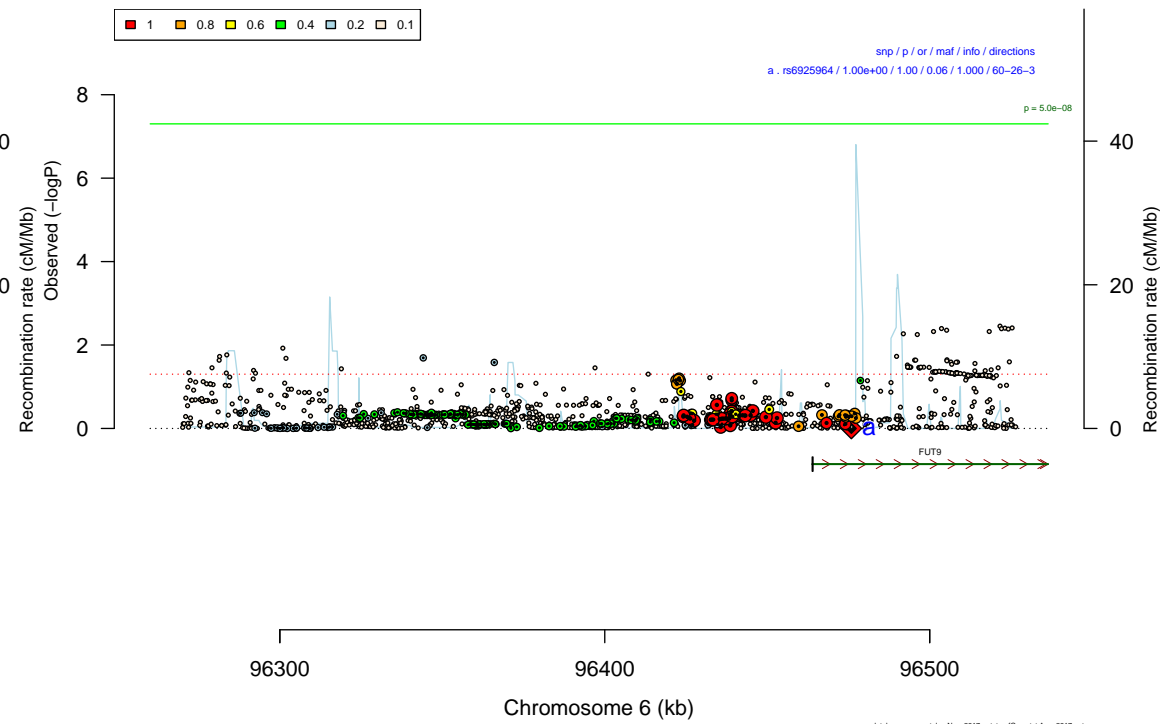

SCZ\_uncond-rs7599488-chr2

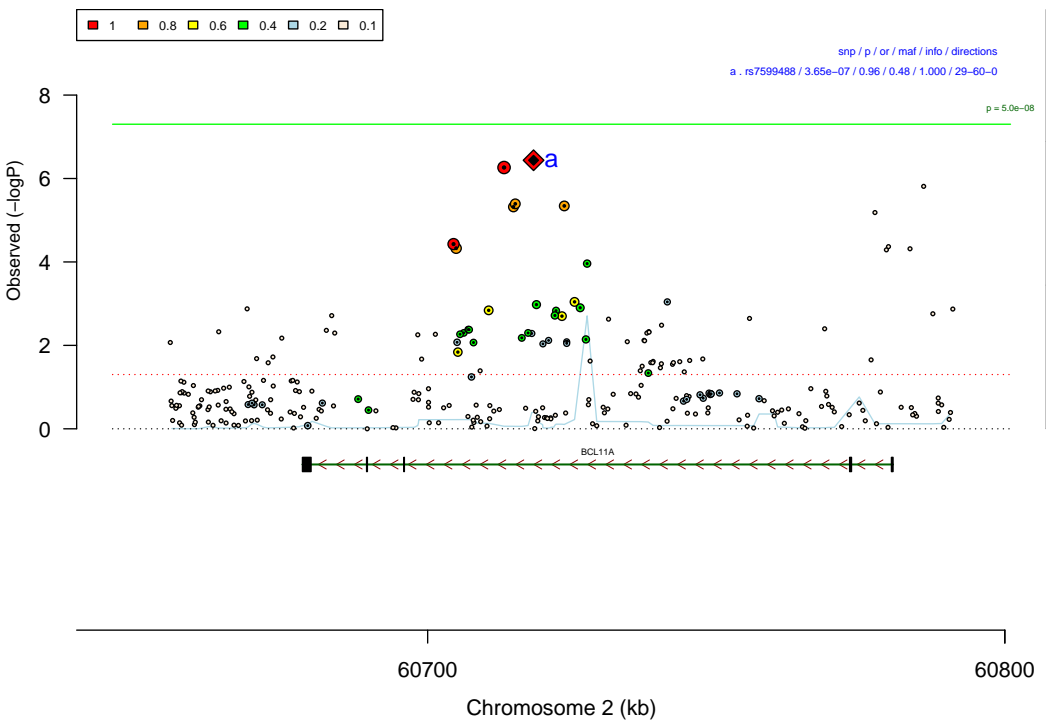

SCZ\_cond-rs7599488-chr2

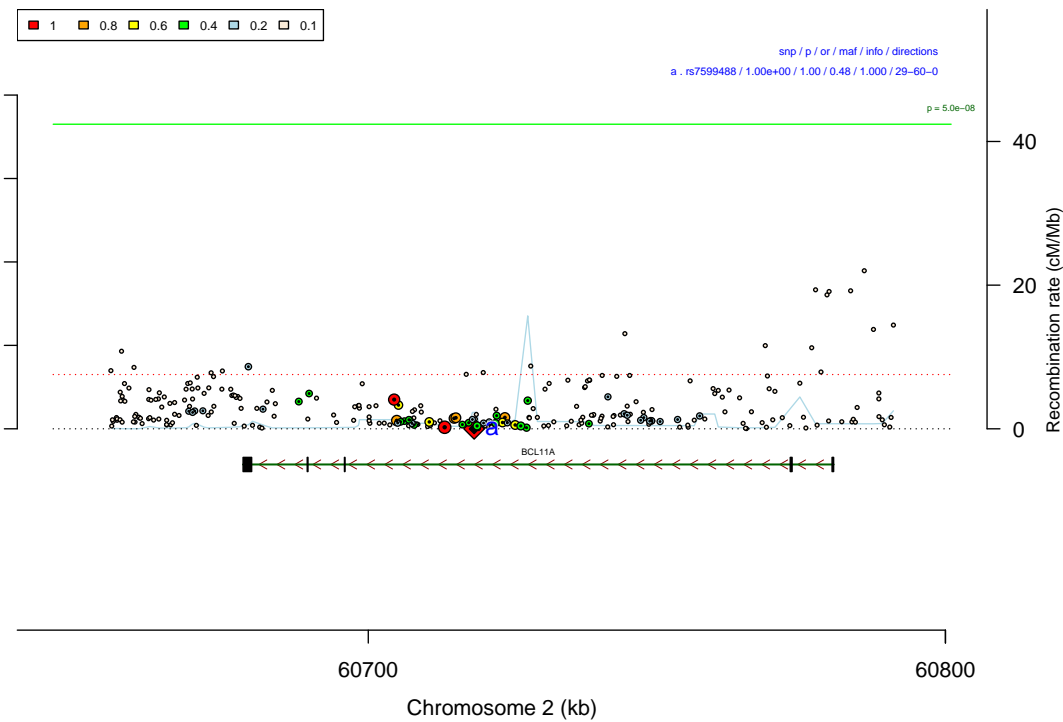

SCZ\_uncond-rs7575796-chr2

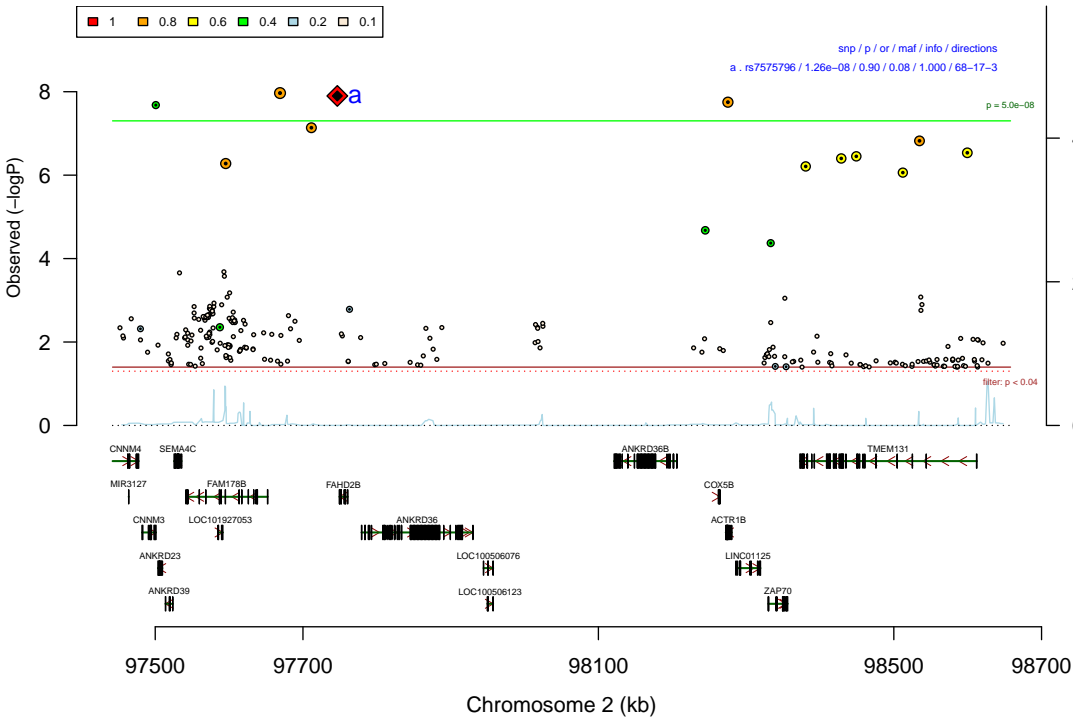

SCZ\_cond-rs7575796-chr2

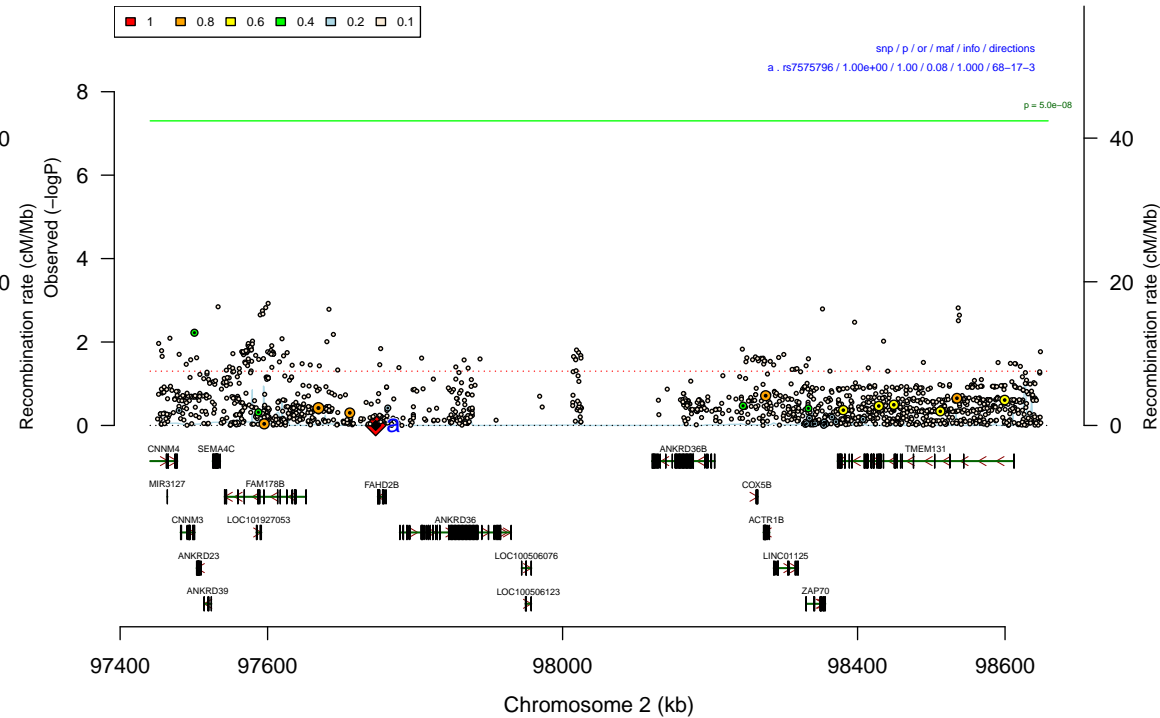

SCZ\_uncond-rs79478621-chr16

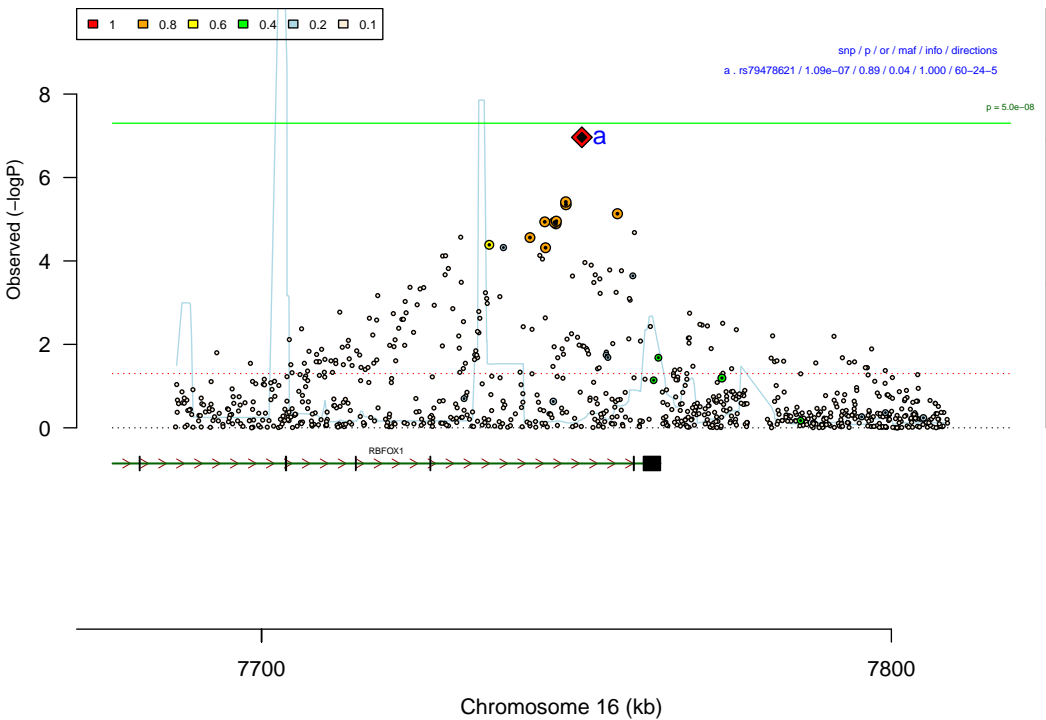

SCZ\_cond-rs79478621-chr16

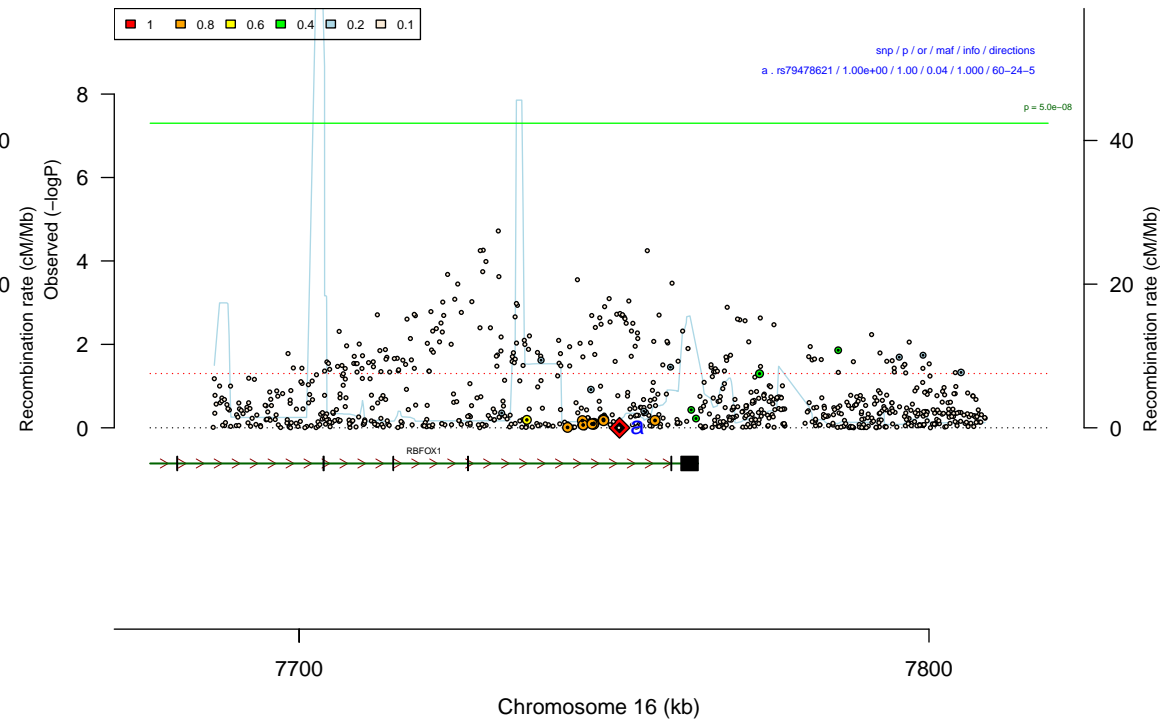

SCZ\_uncond-rs167924-chr3

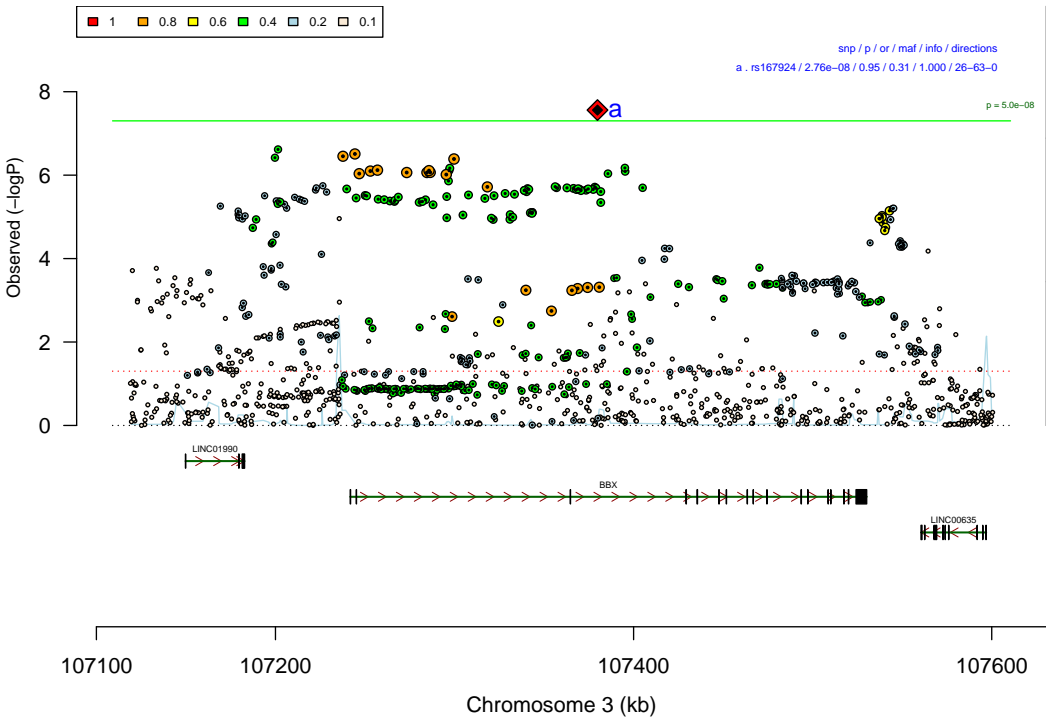

SCZ\_cond-rs167924-chr3

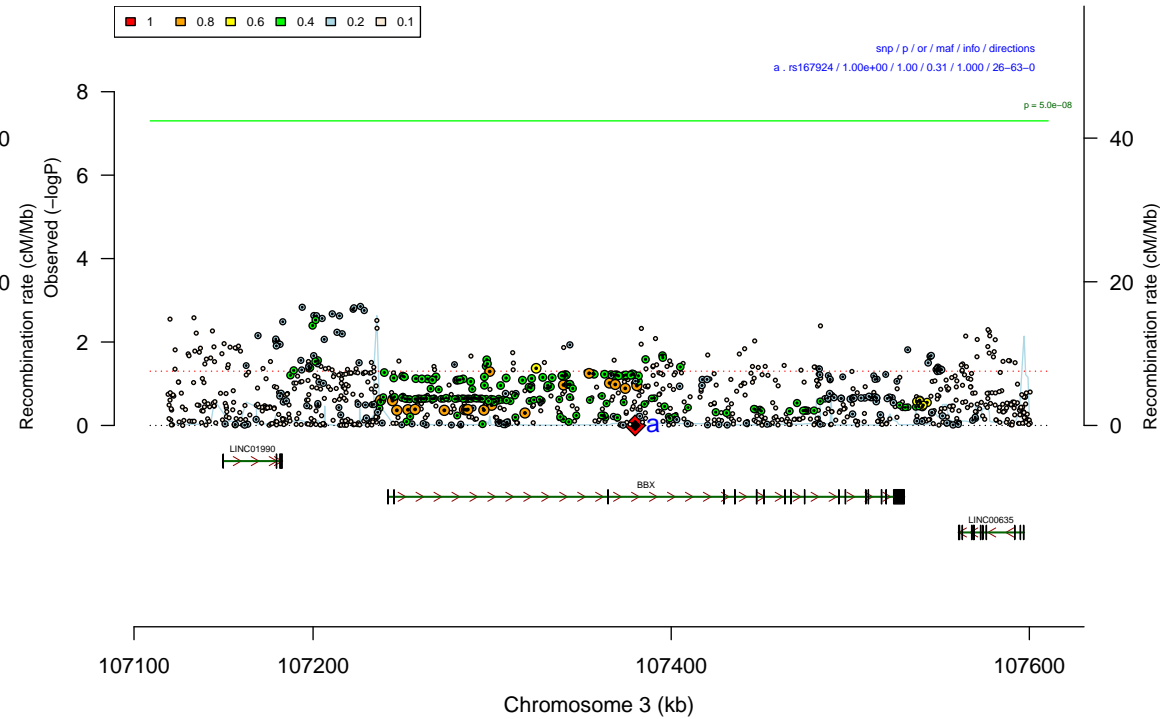

SCZ\_uncond-rs7845103-chr8

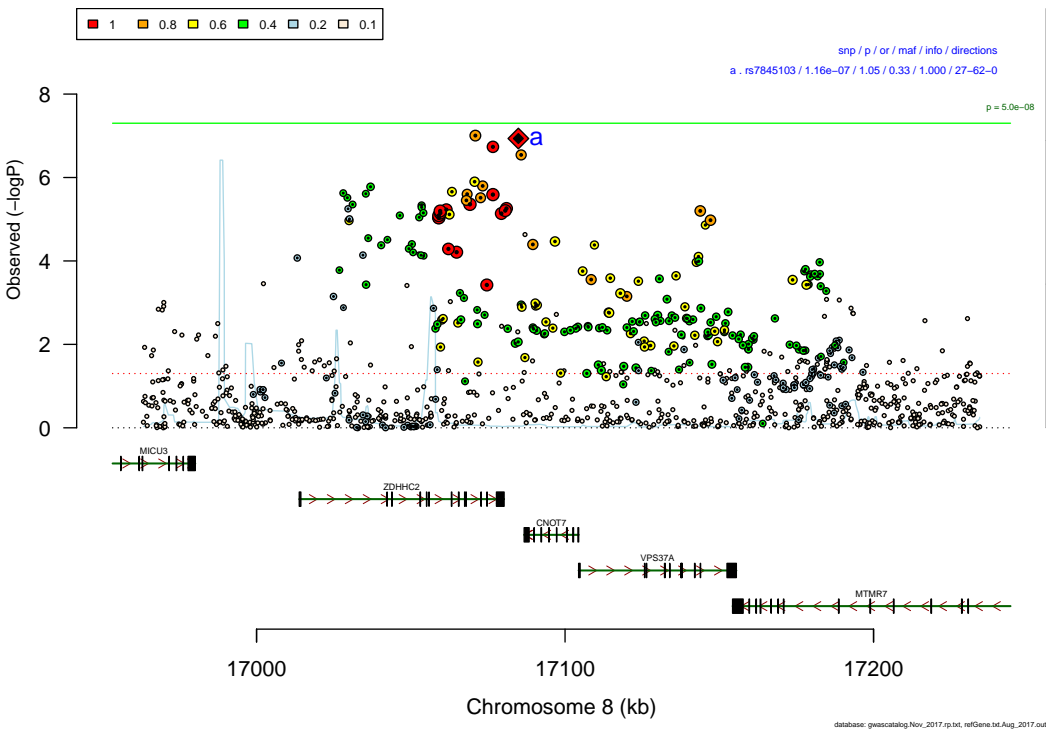

SCZ\_cond-rs7845103-chr8

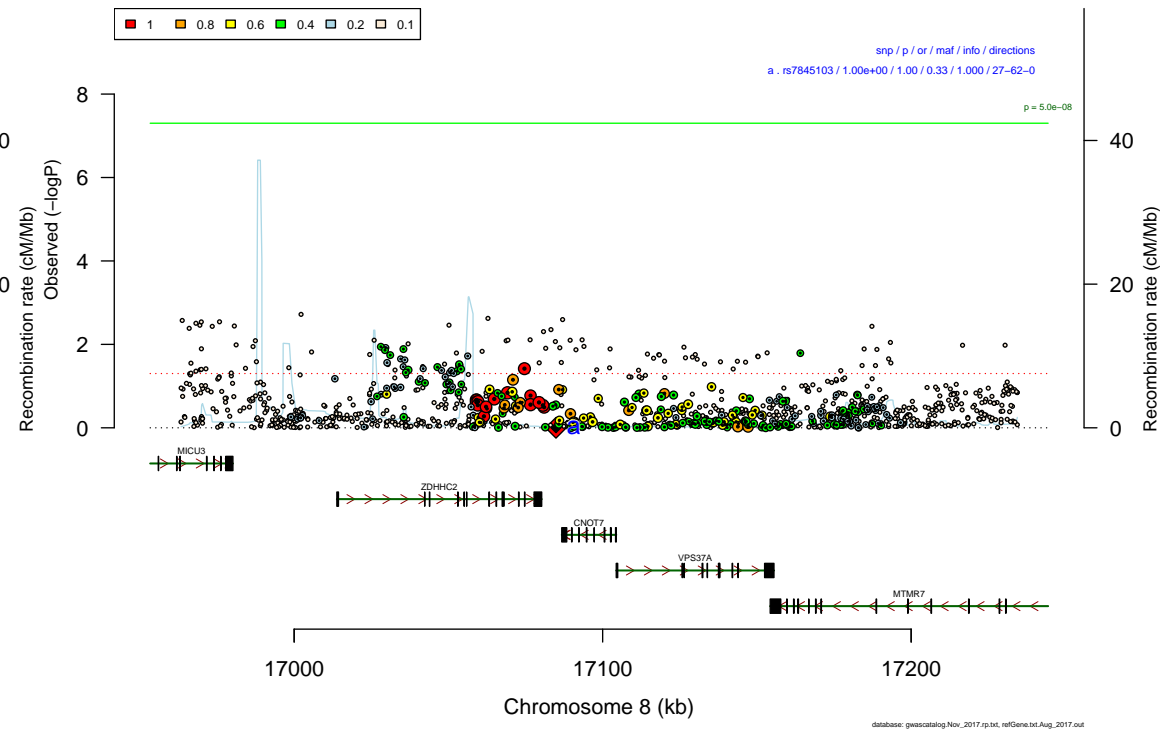

SCZ\_uncond-rs529486-chr12

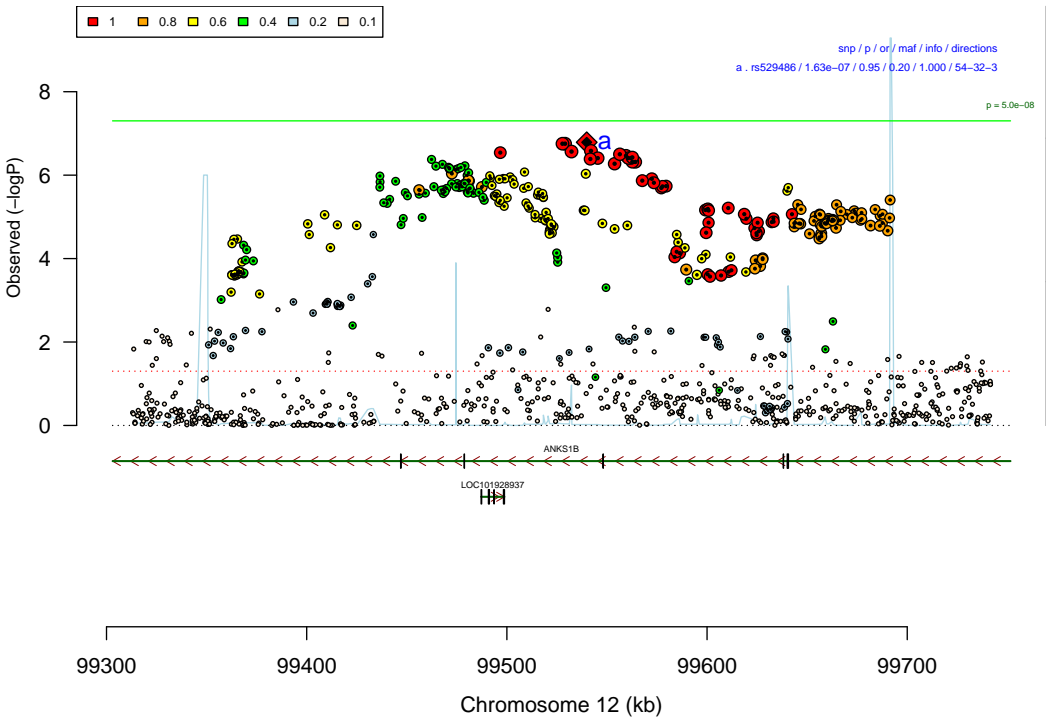

SCZ\_cond-rs529486-chr12

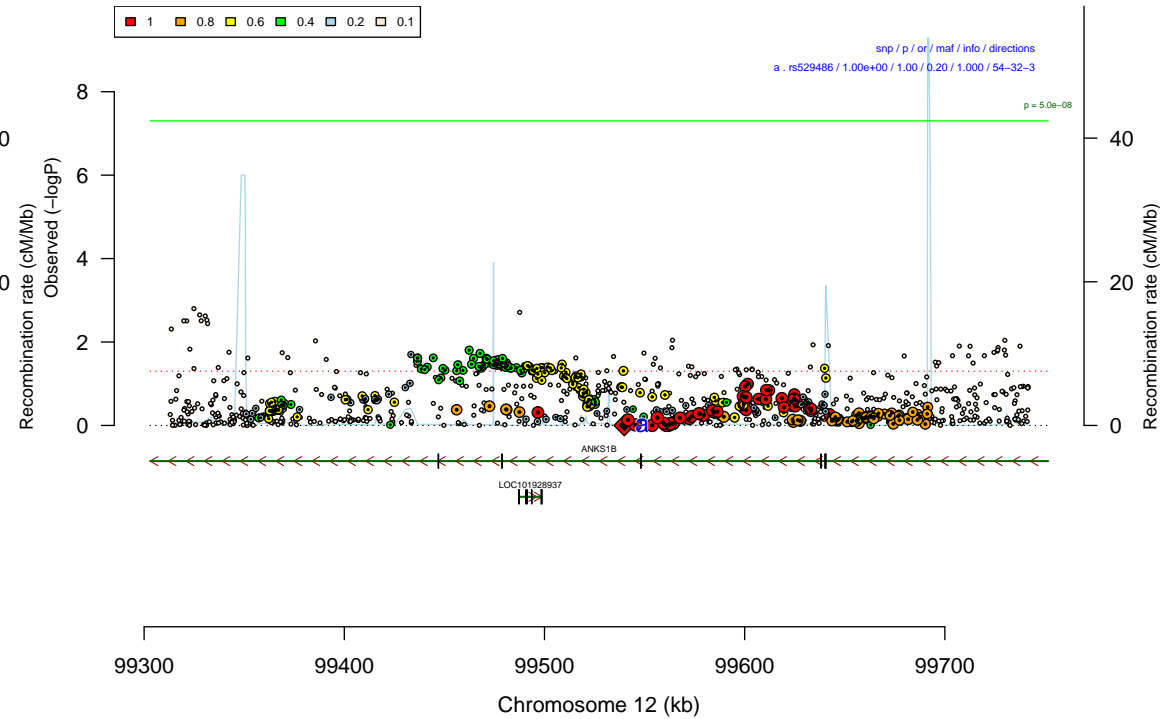

SCZ\_uncond-rs154433-chr16

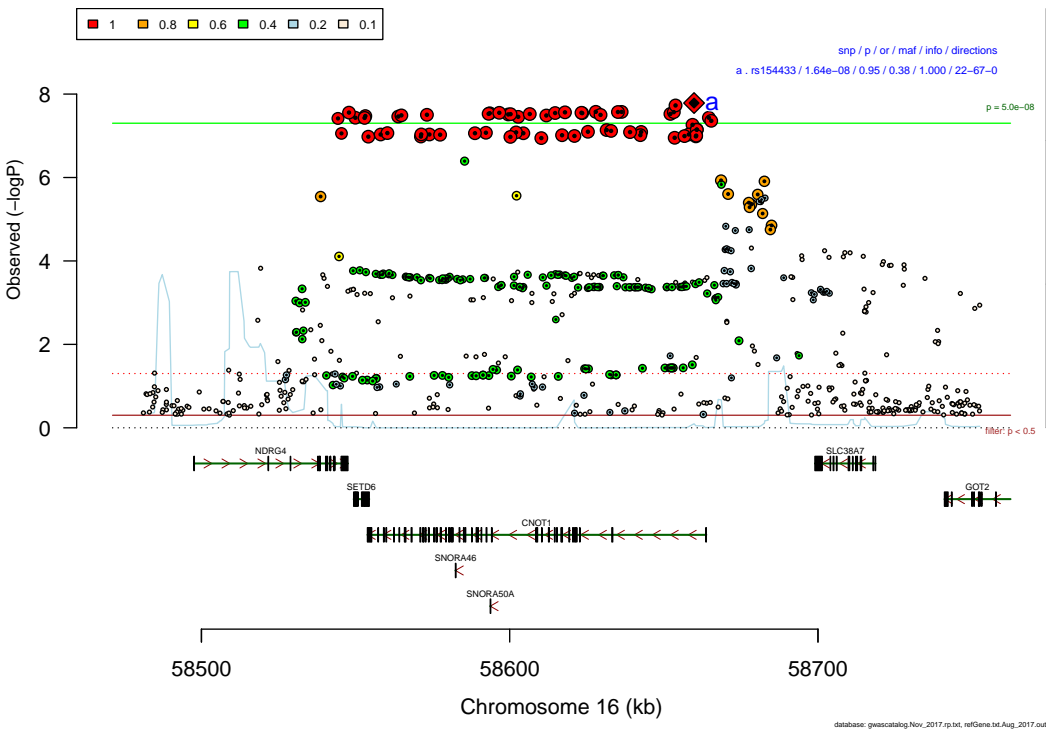

SCZ\_cond-rs154433-chr16

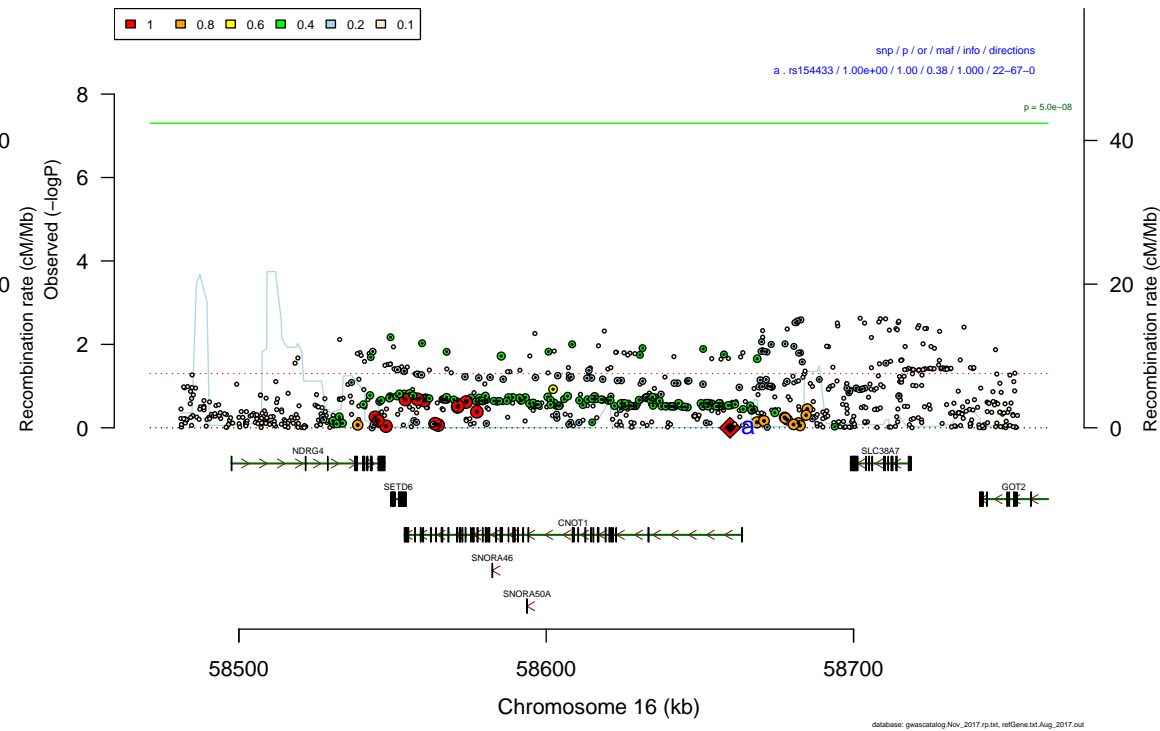

SCZ\_uncond-rs1593769-chr4

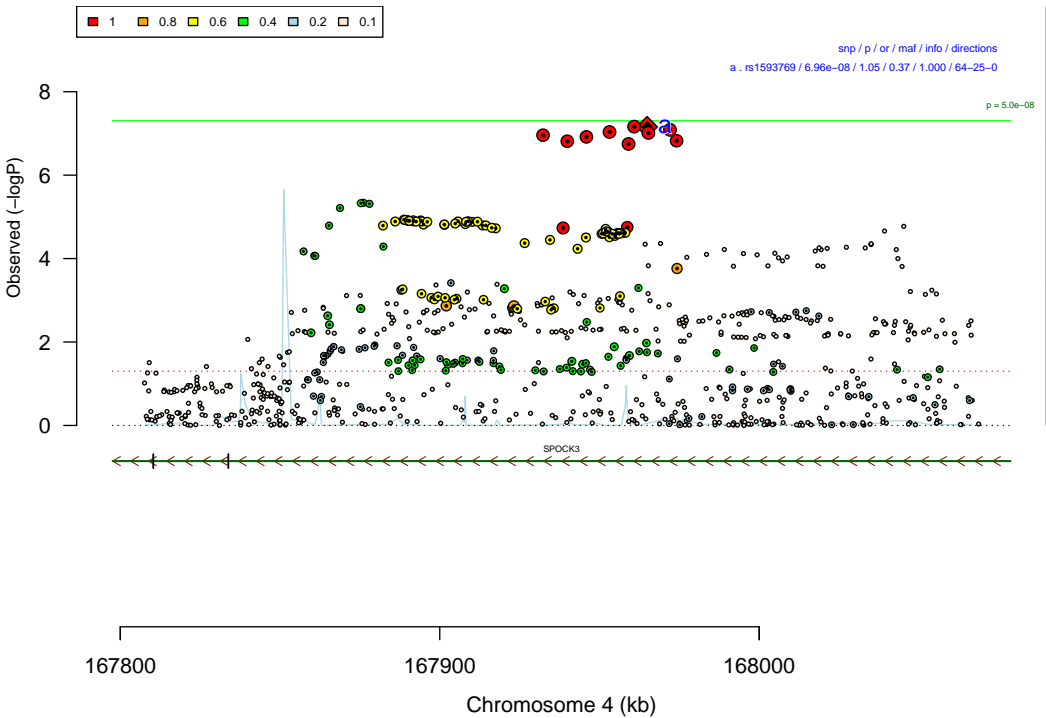

SCZ\_cond-rs1593769-chr4

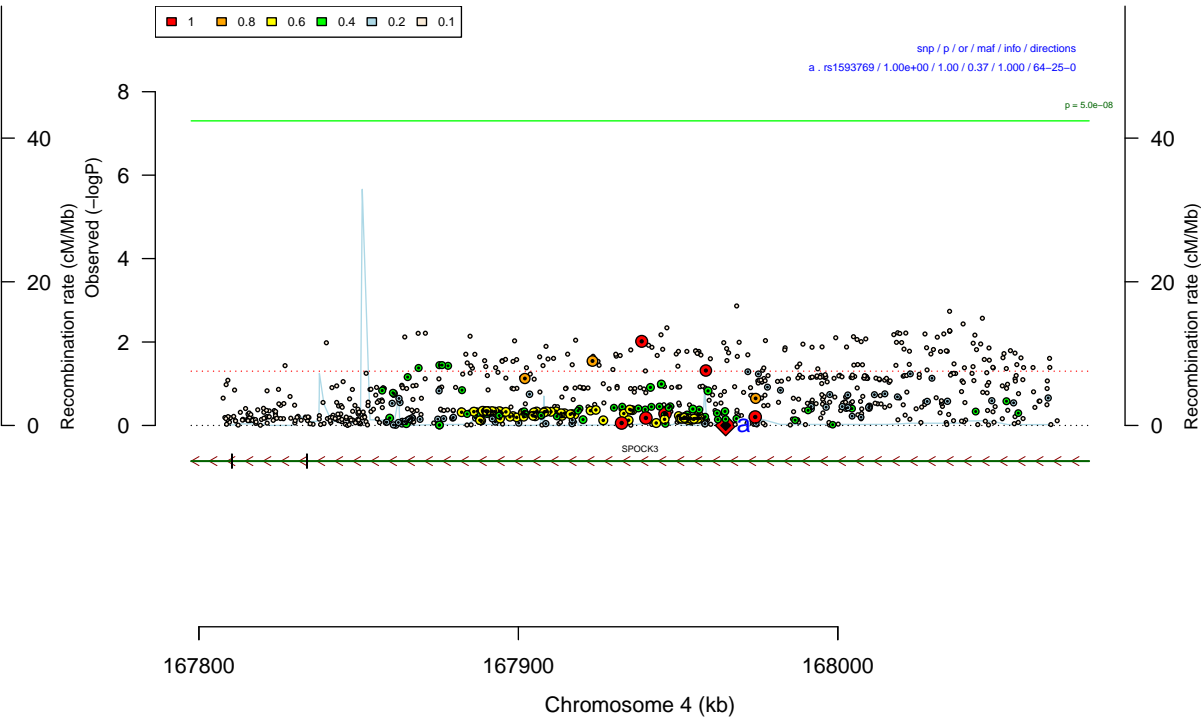

SCZ\_uncond-rs4298523-chr8

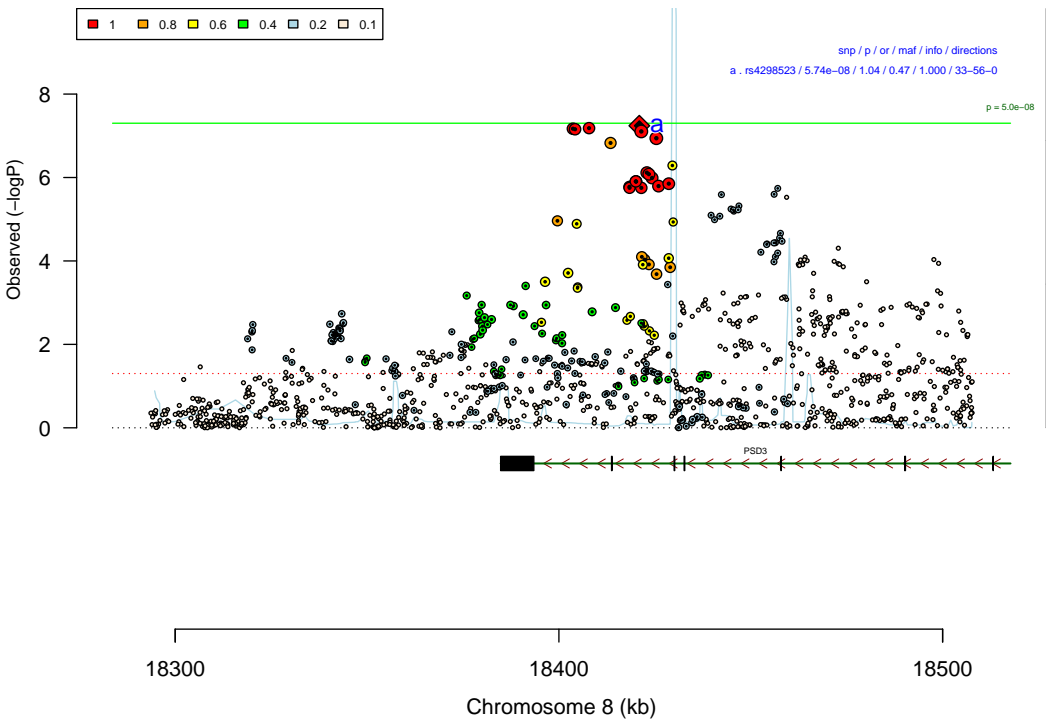

SCZ\_cond-rs4298523-chr8

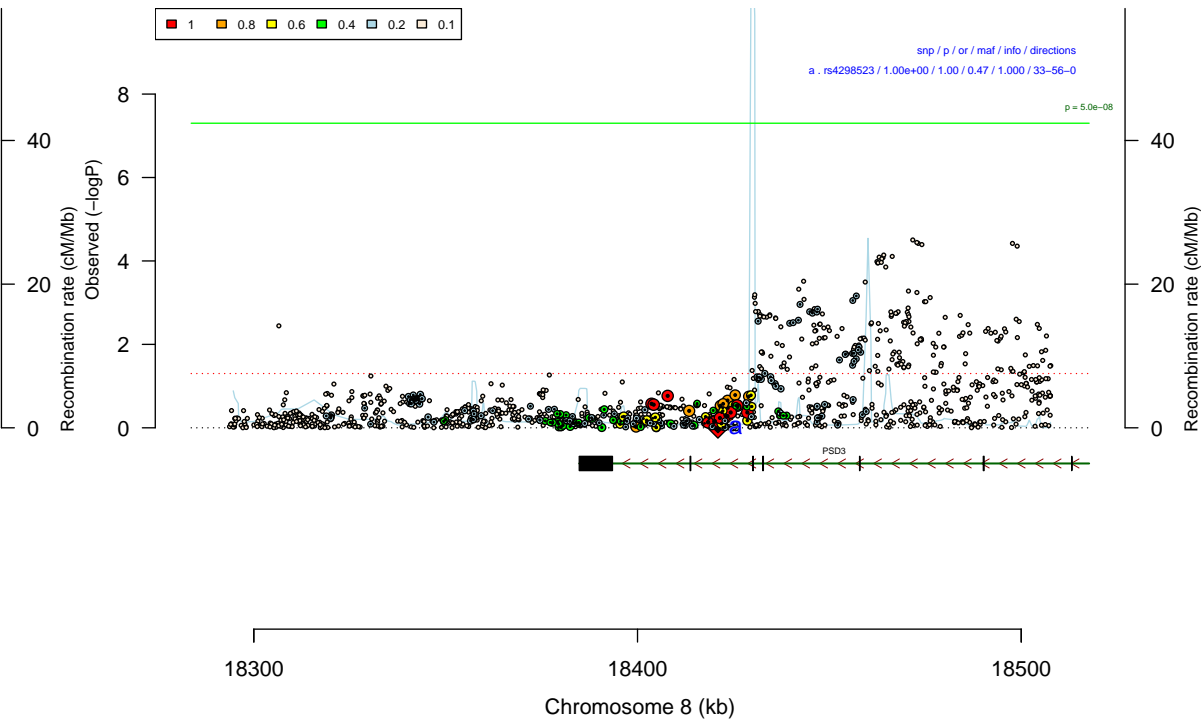

SCZ\_uncond-rs1542560-chr6

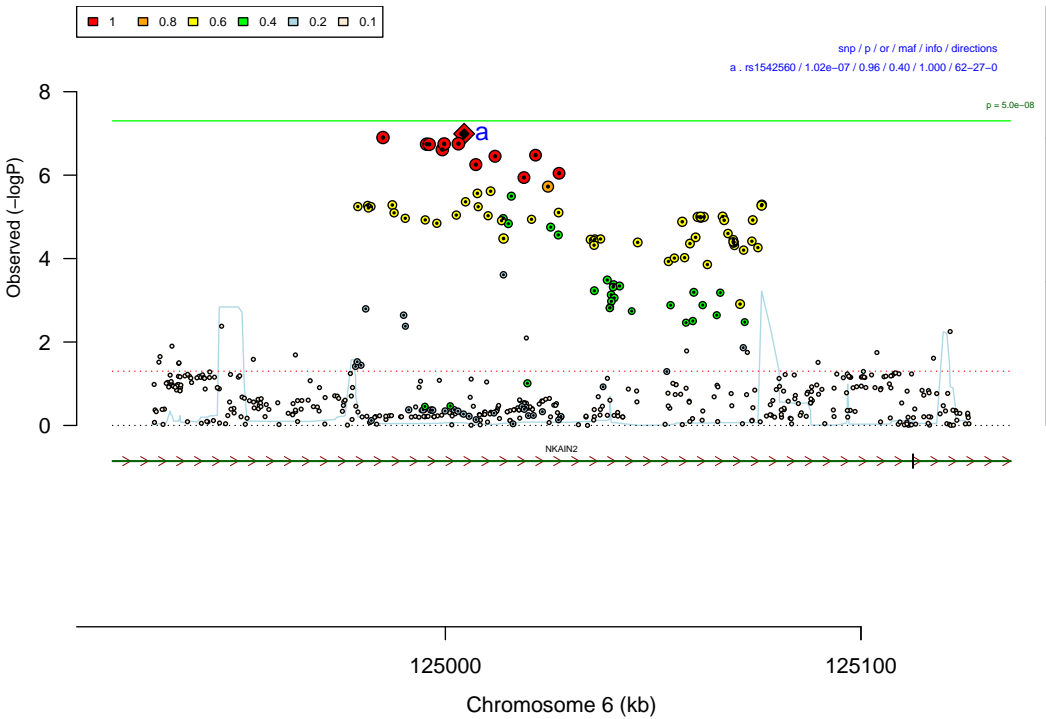

SCZ\_cond-rs1542560-chr6

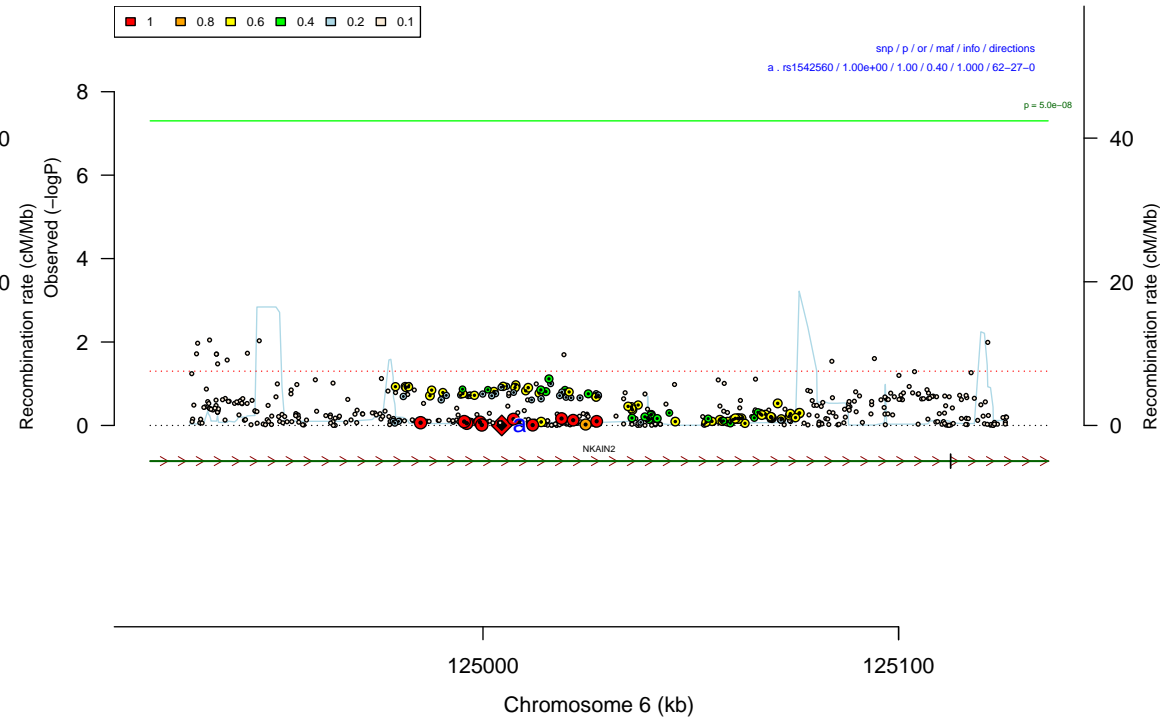

SCZ\_uncond-rs61838369-chr1

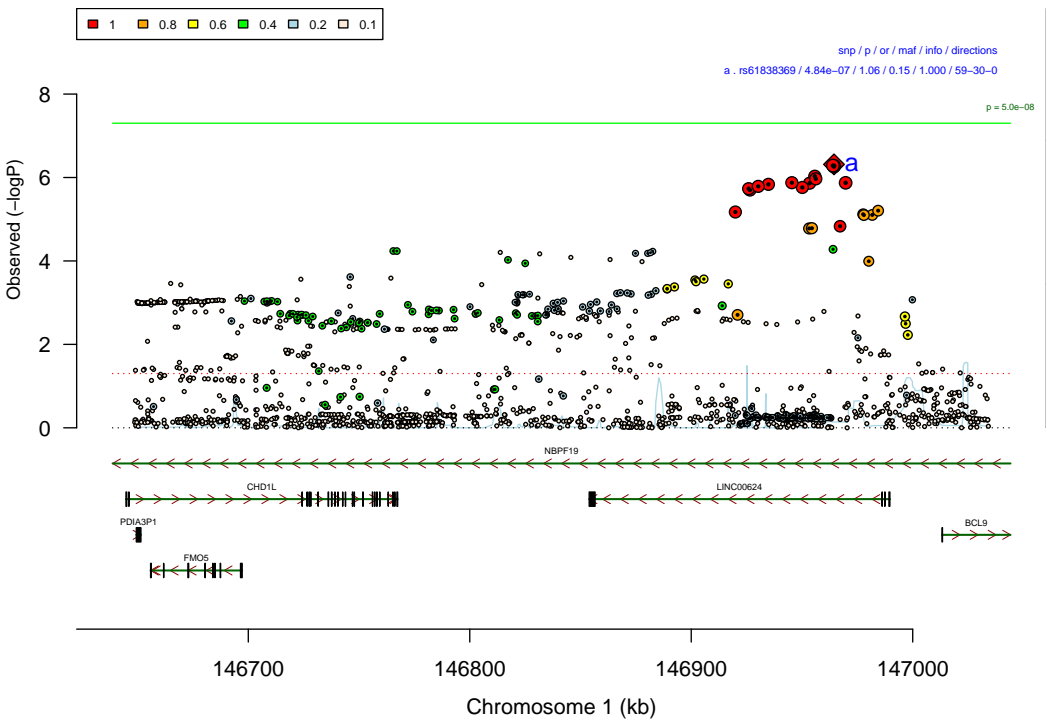

SCZ\_cond-rs61838369-chr1

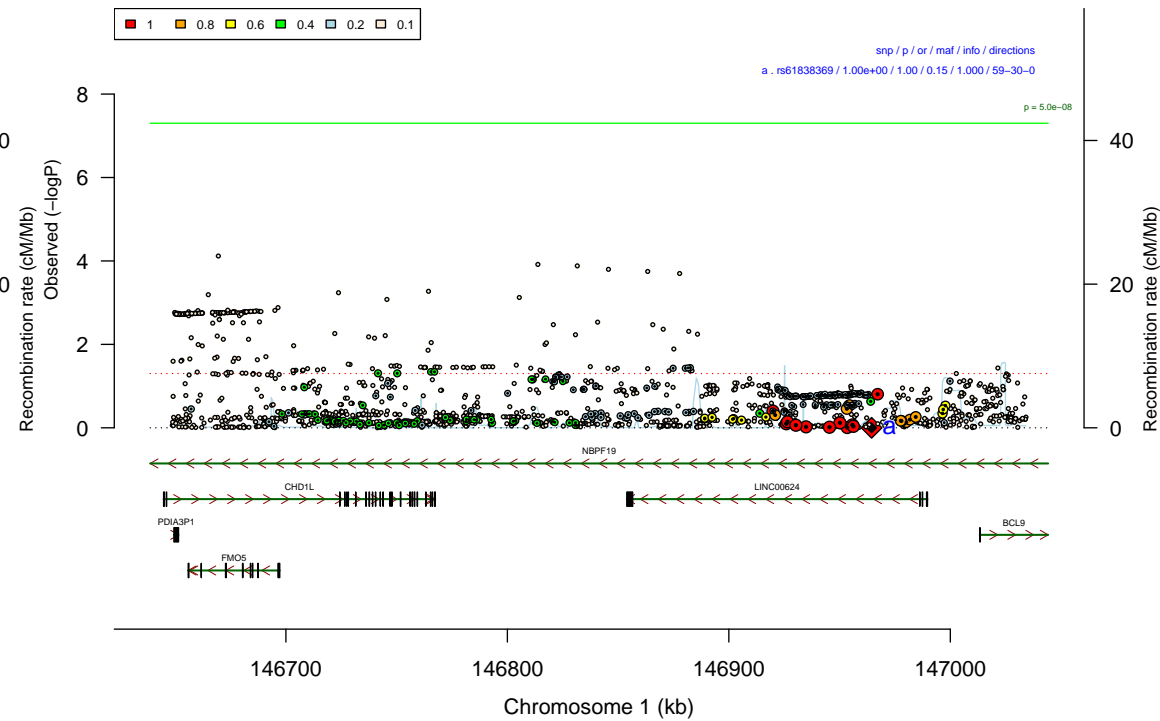

SCZ\_uncond-rs113239787-chr14

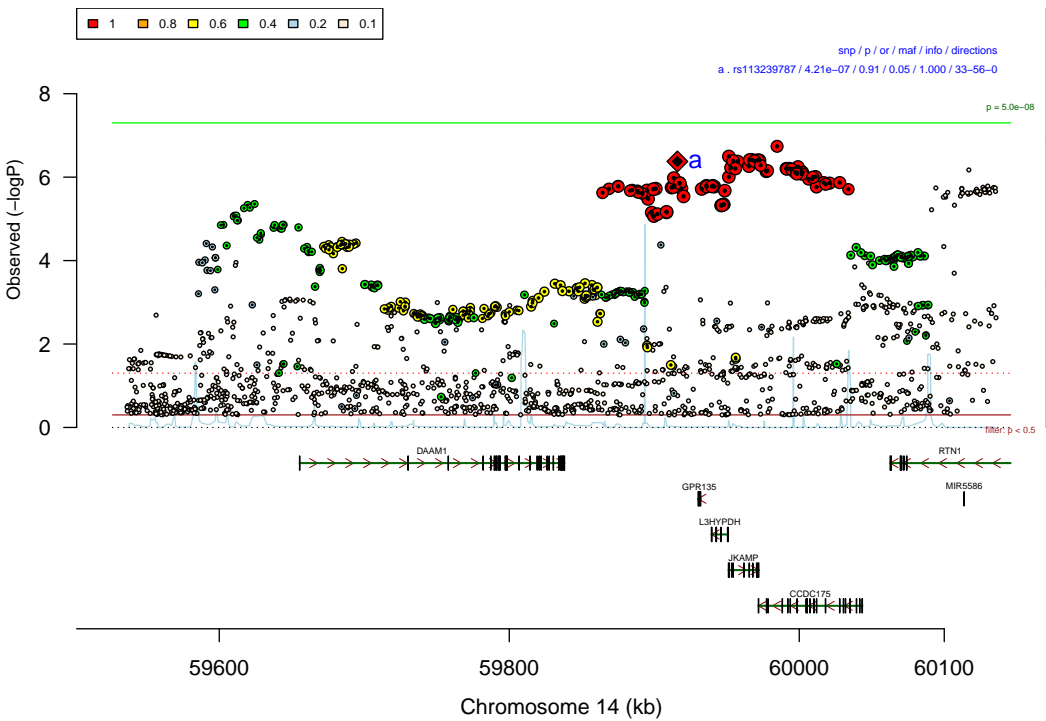

SCZ\_cond-rs113239787-chr14

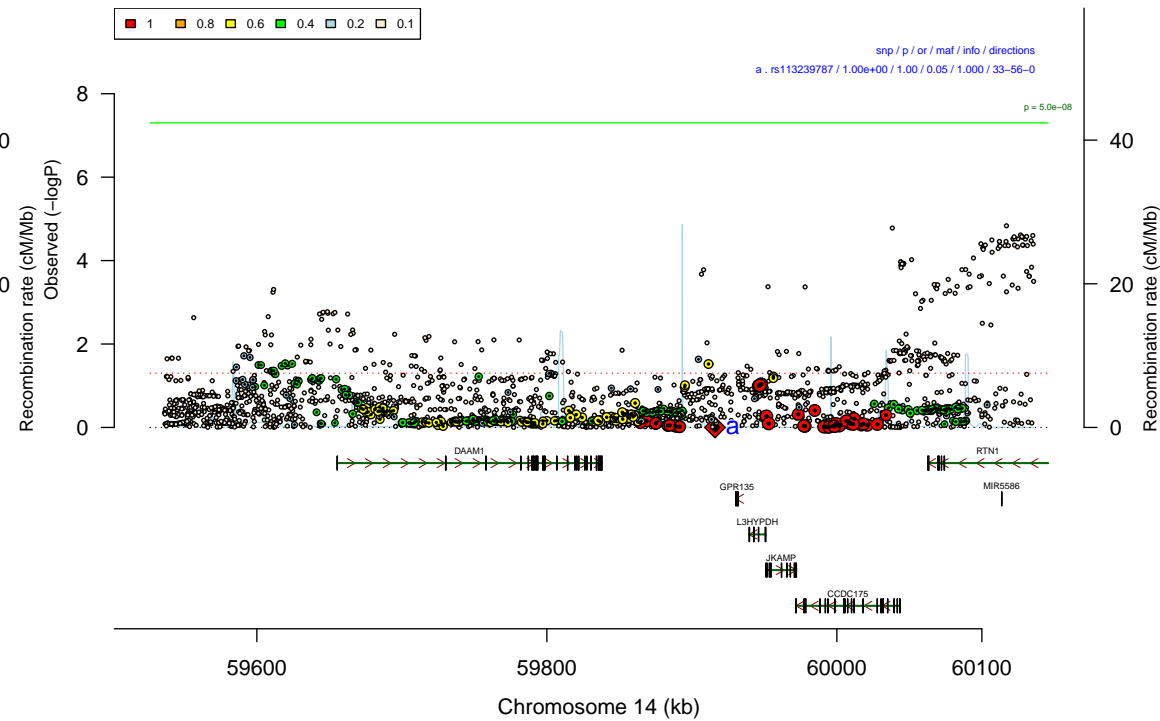

SCZ\_uncond-rs13233308-chr7

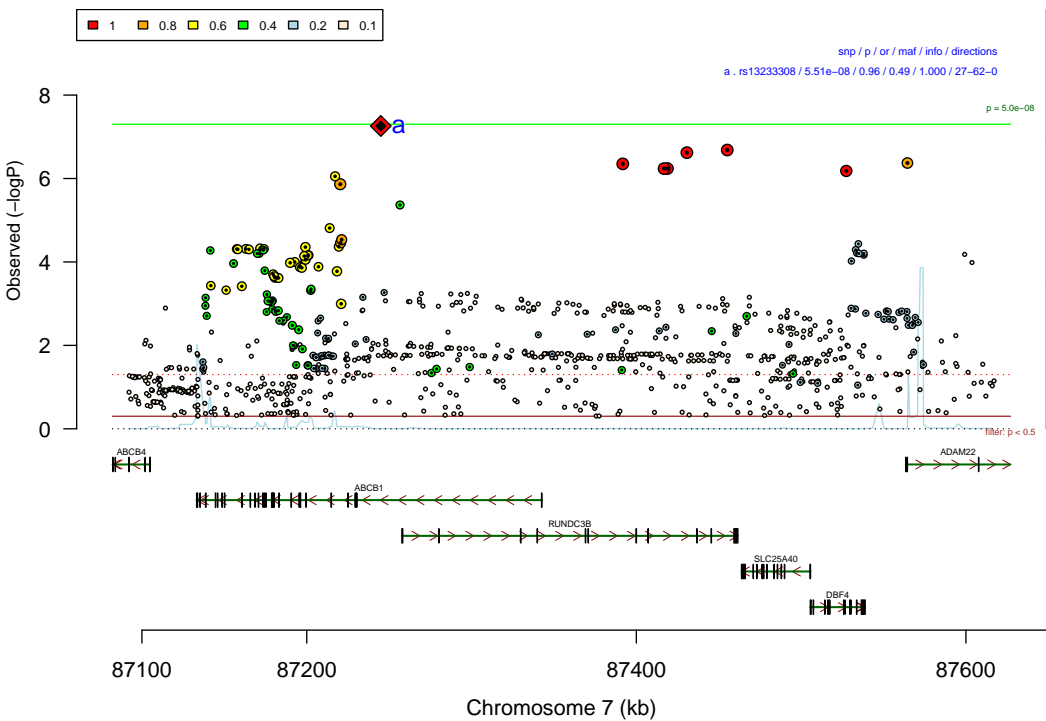

SCZ\_cond-rs13233308-chr7

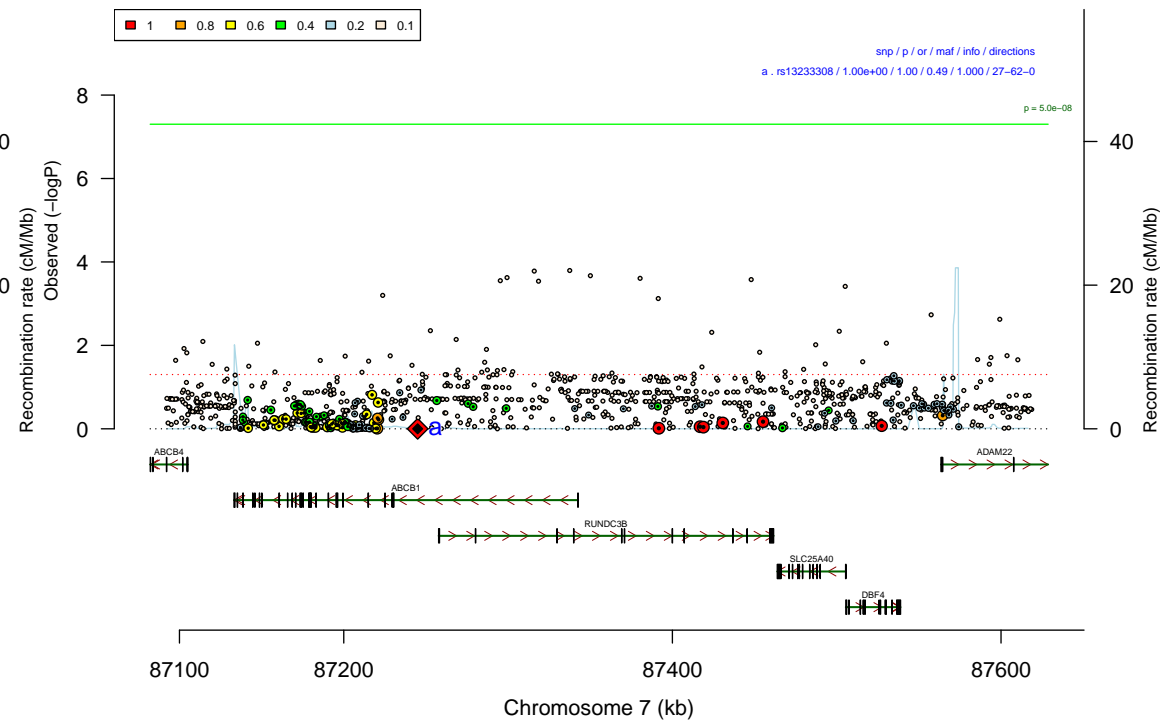

SCZ\_uncond-rs76365544-chr22

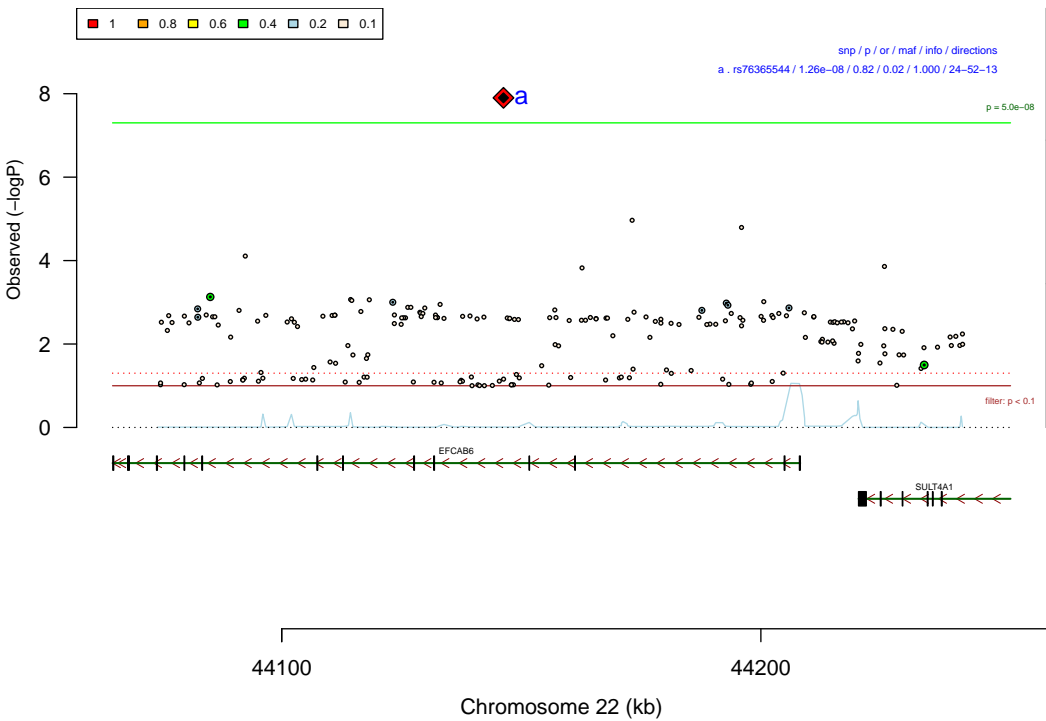

SCZ\_cond-rs76365544-chr22

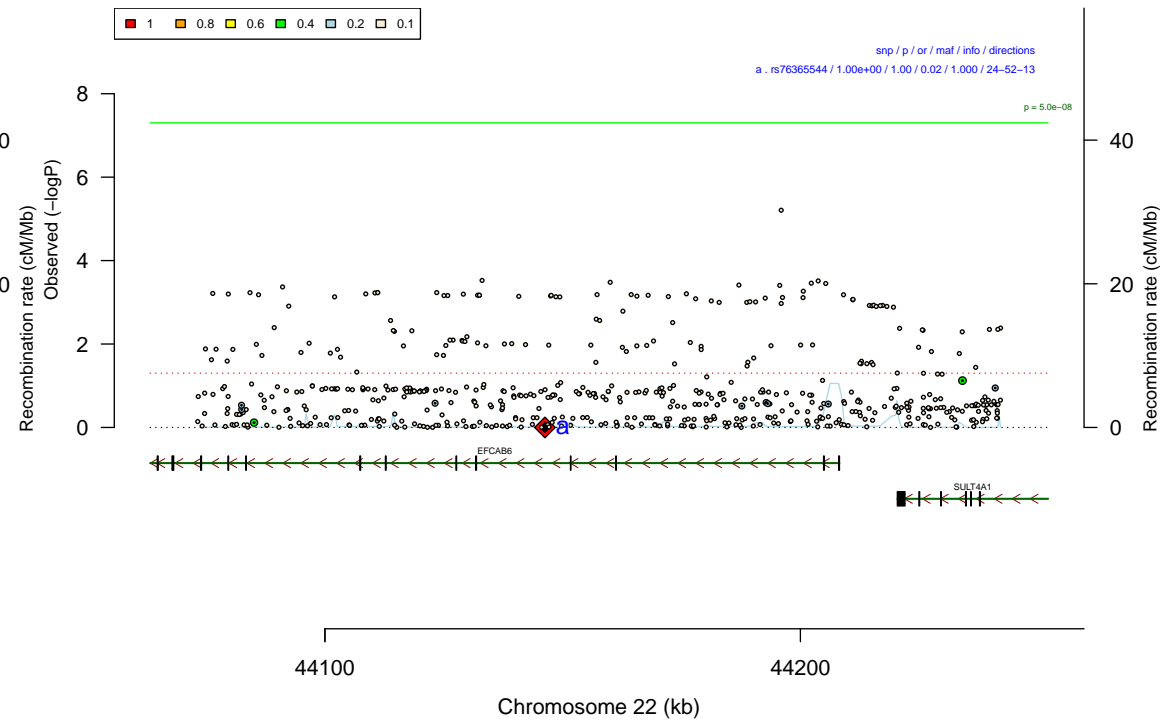

SCZ\_uncond-rs71323641-chr3

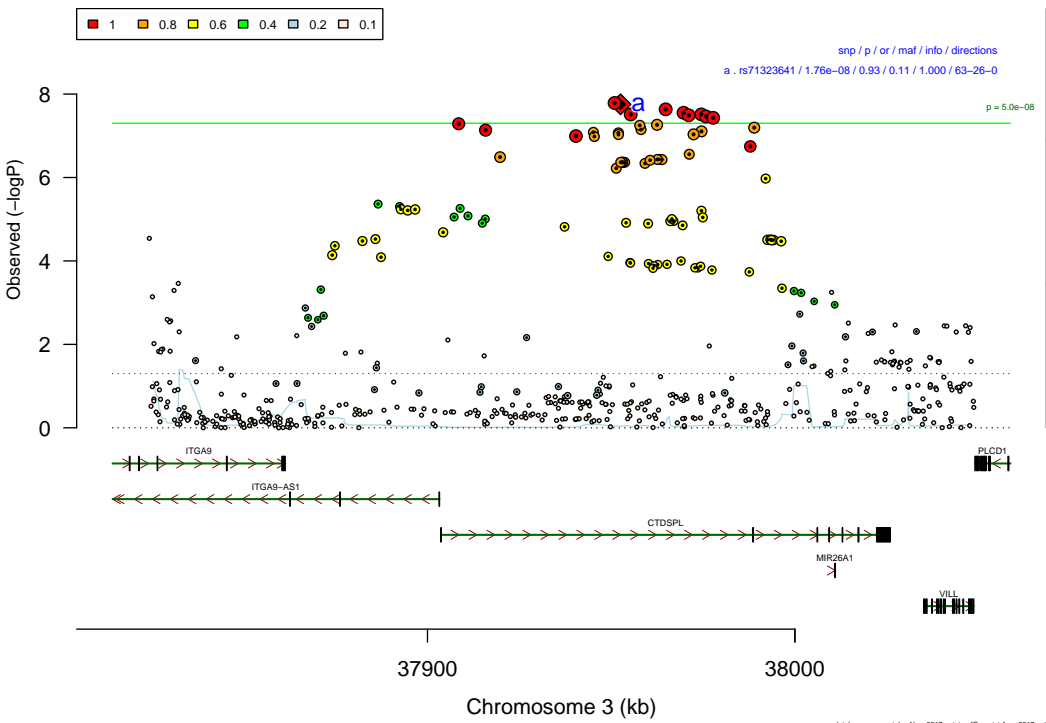

SCZ\_cond-rs71323641-chr3

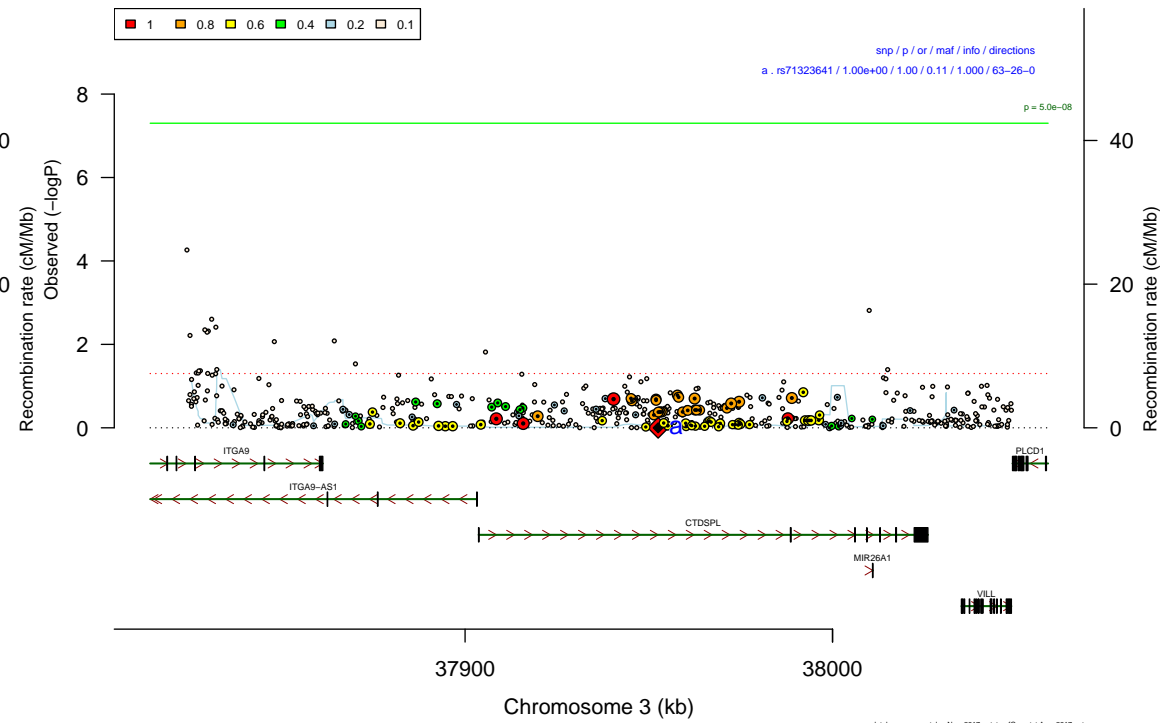



SCZ\_uncond-rs2917627-chr15

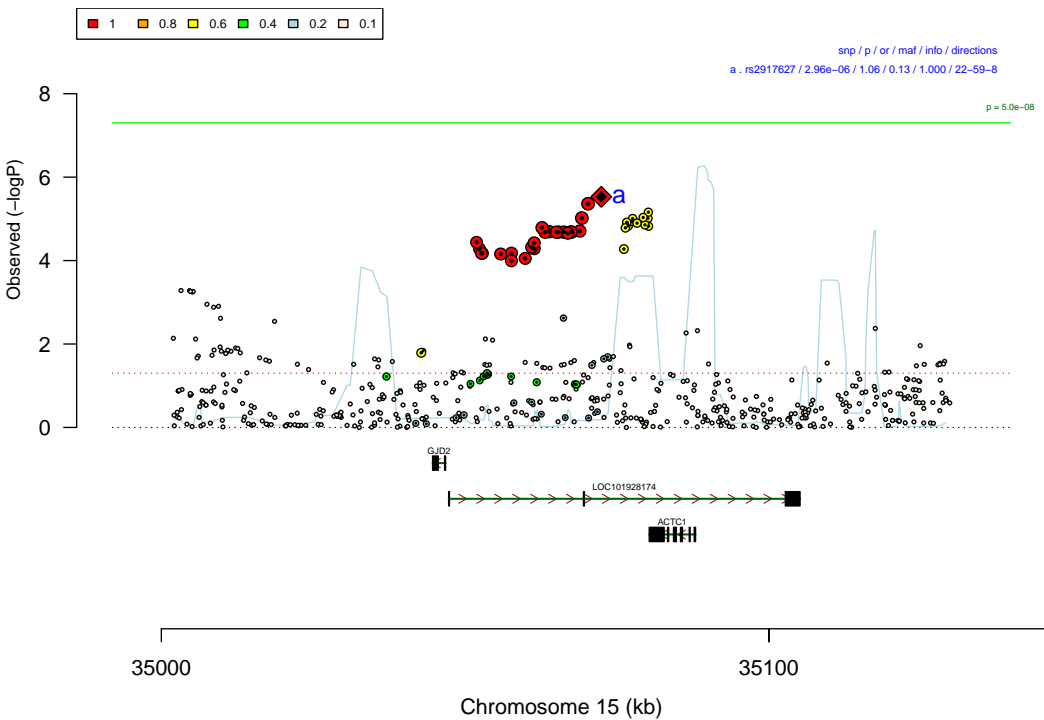

SCZ\_cond-rs2917627-chr15

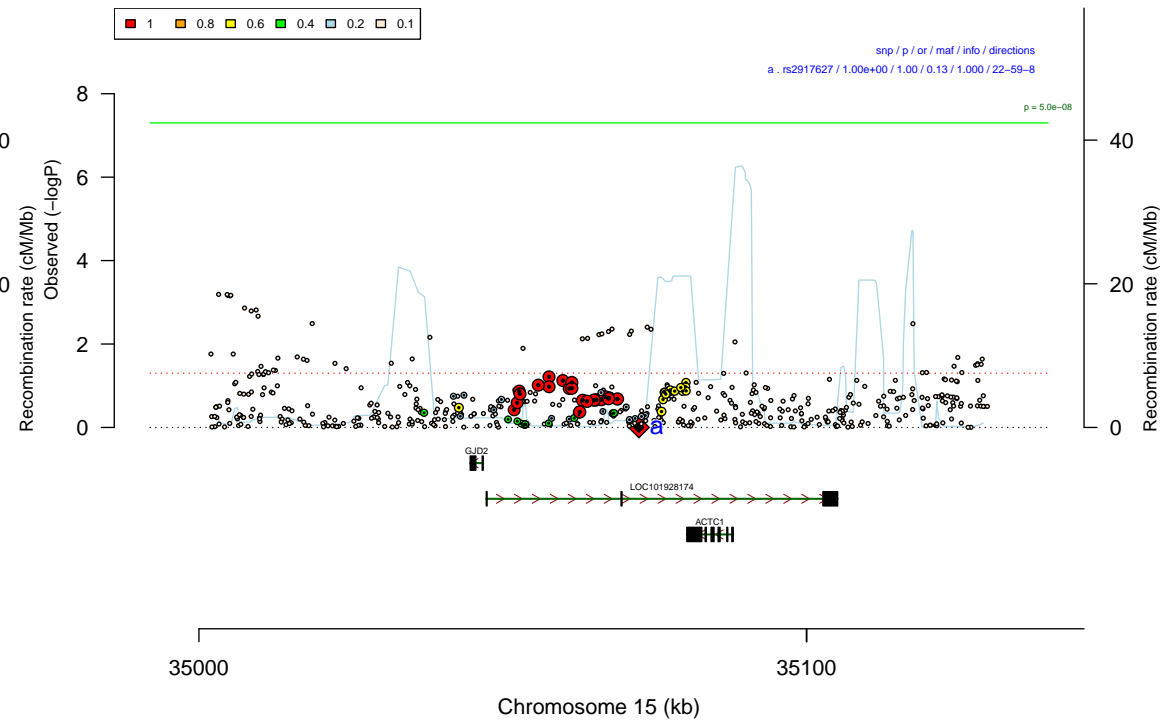

SCZ\_uncond-rs35026989-chr2

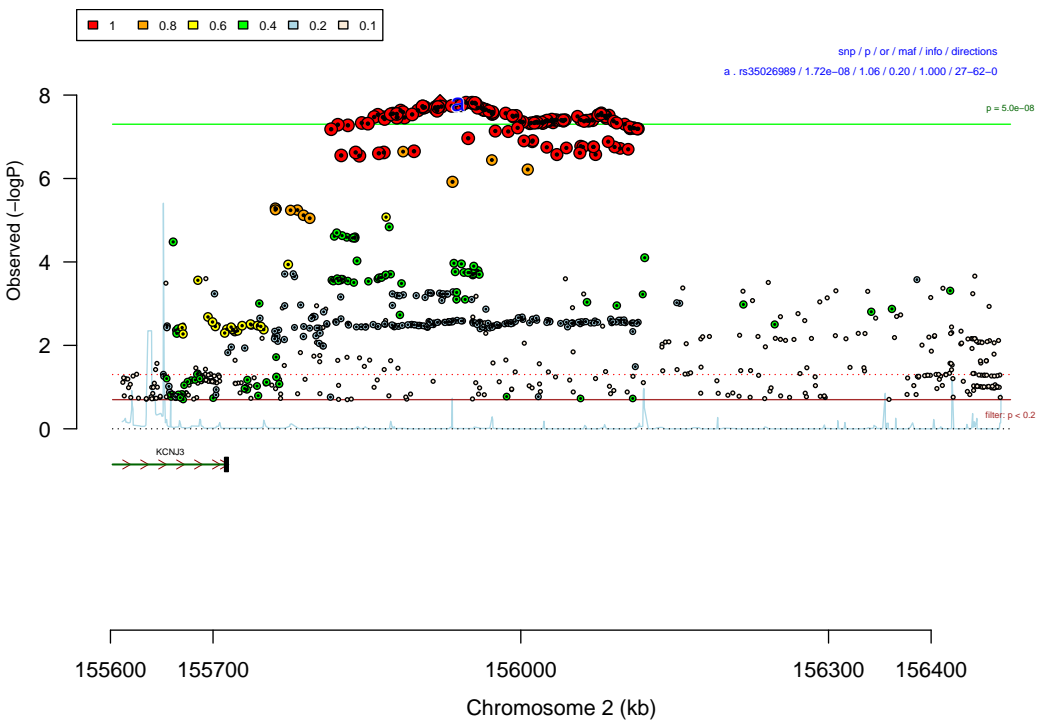

SCZ\_cond-rs35026989-chr2

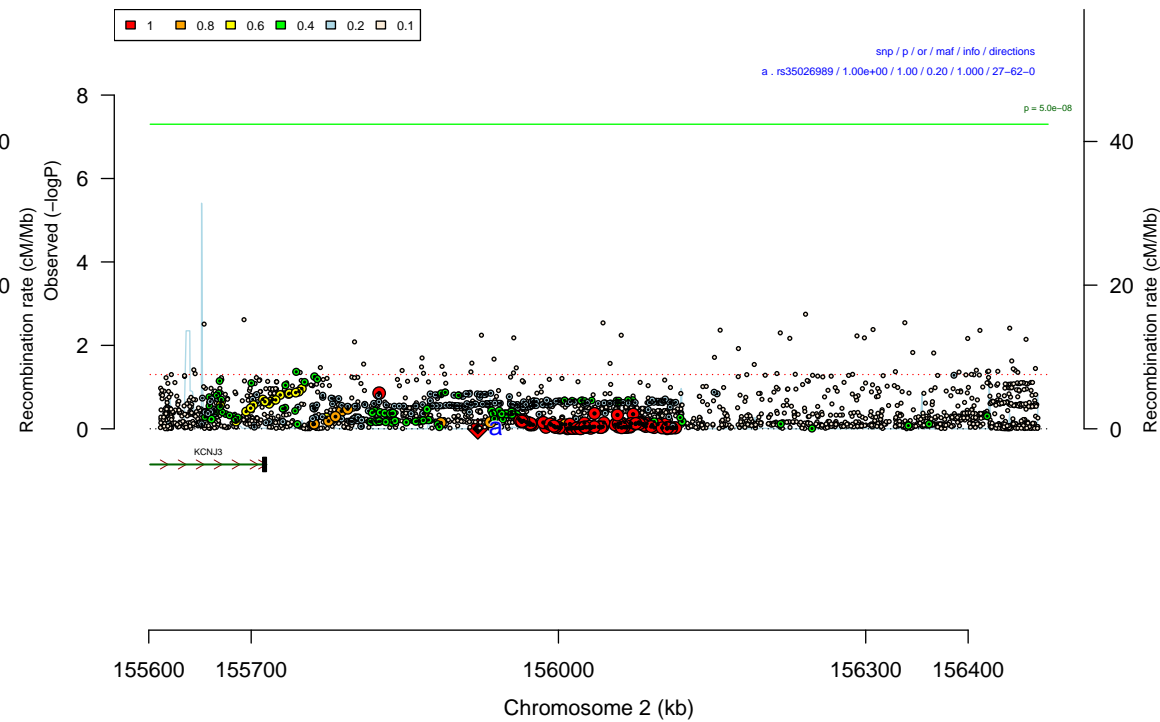

SCZ\_uncond-rs9487653-chr6

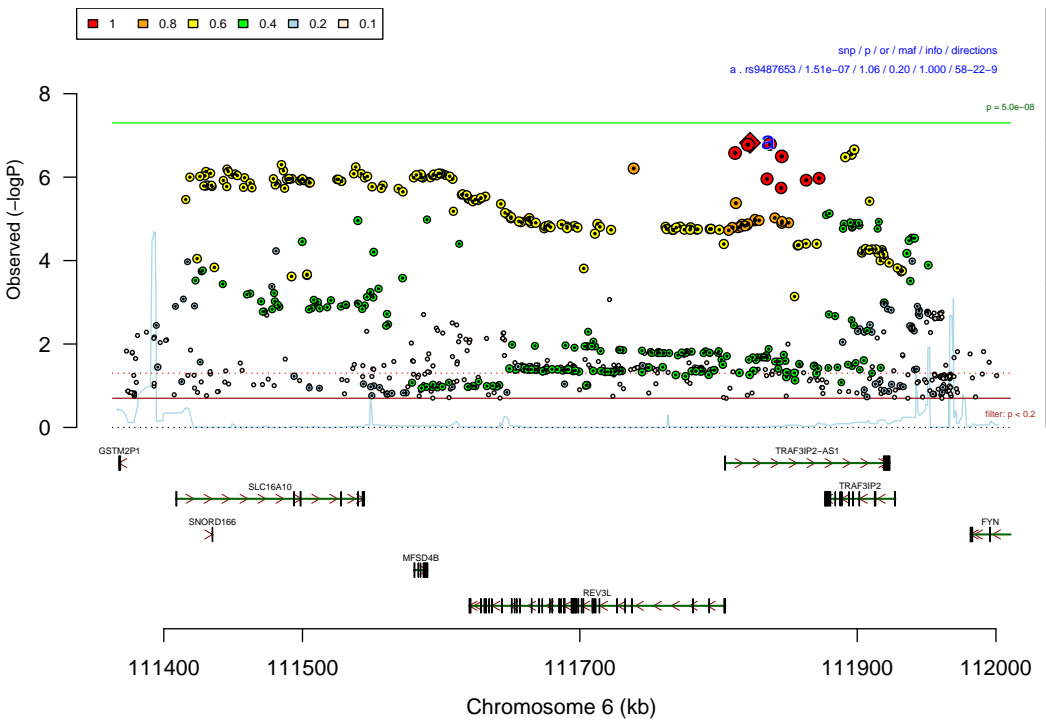

SCZ\_cond-rs9487653-chr6

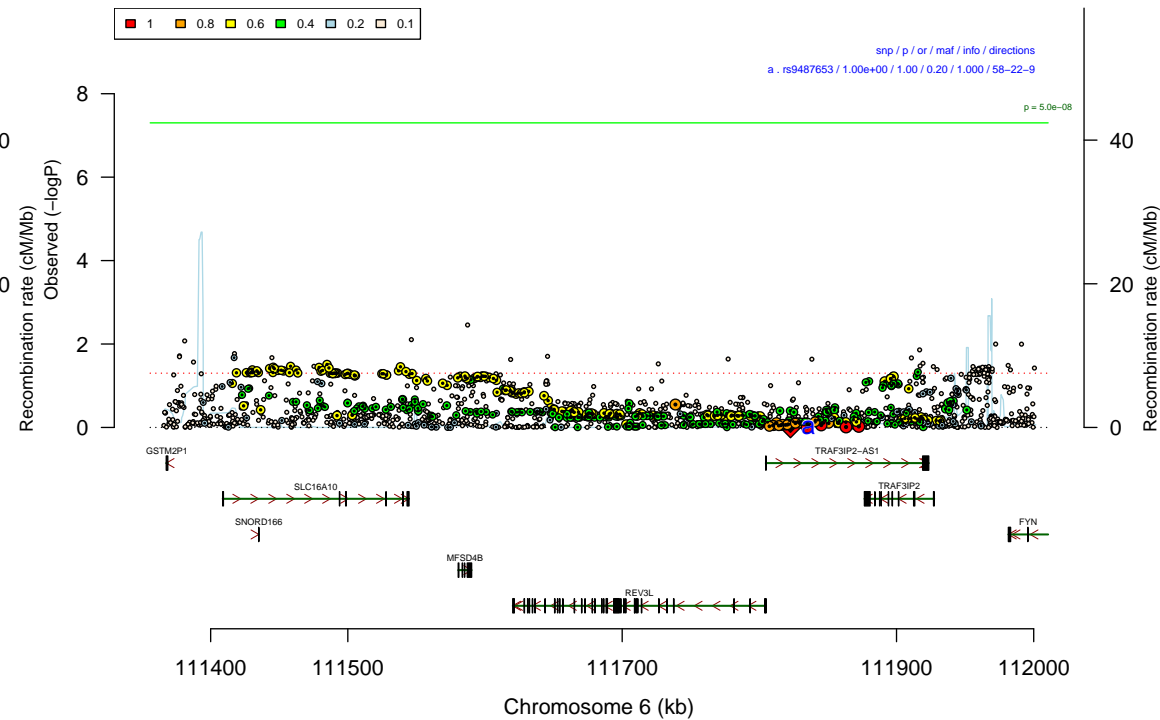

SCZ\_uncond-rs11750149-chr5

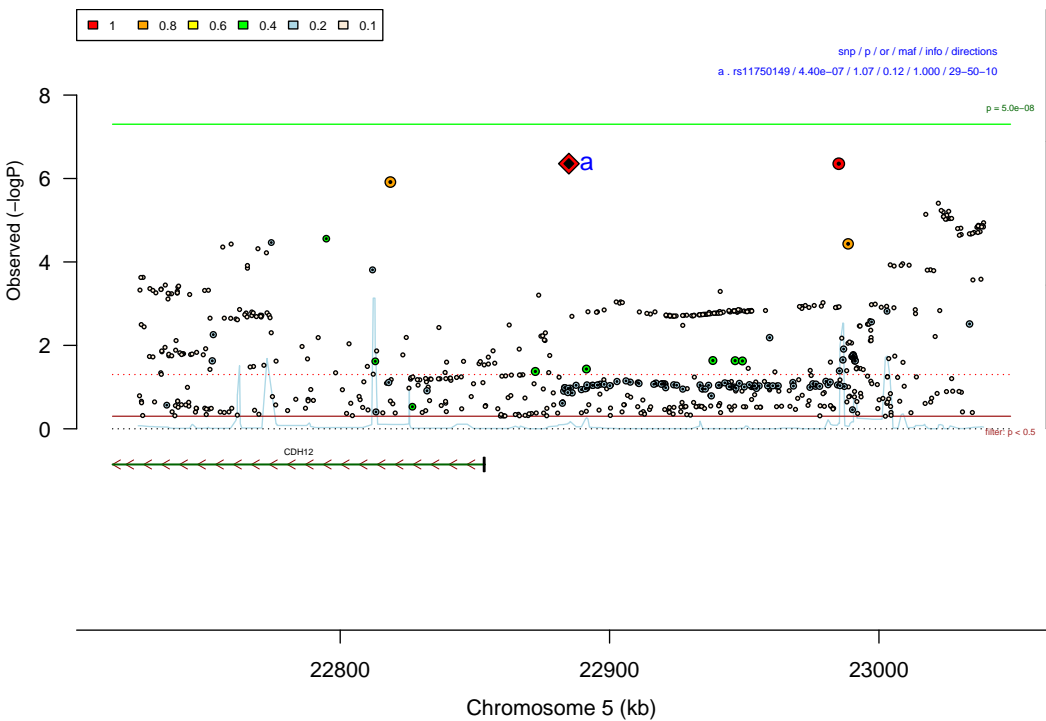

SCZ\_cond-rs11750149-chr5

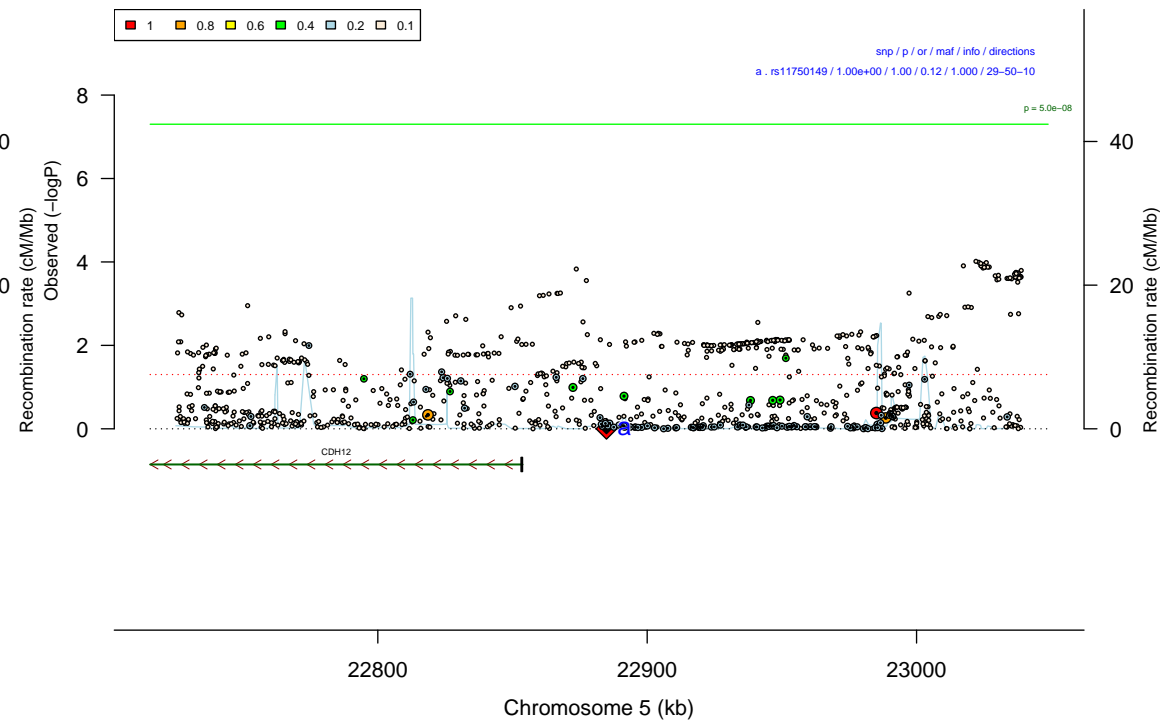

SCZ\_uncond-rs2299409-chr7

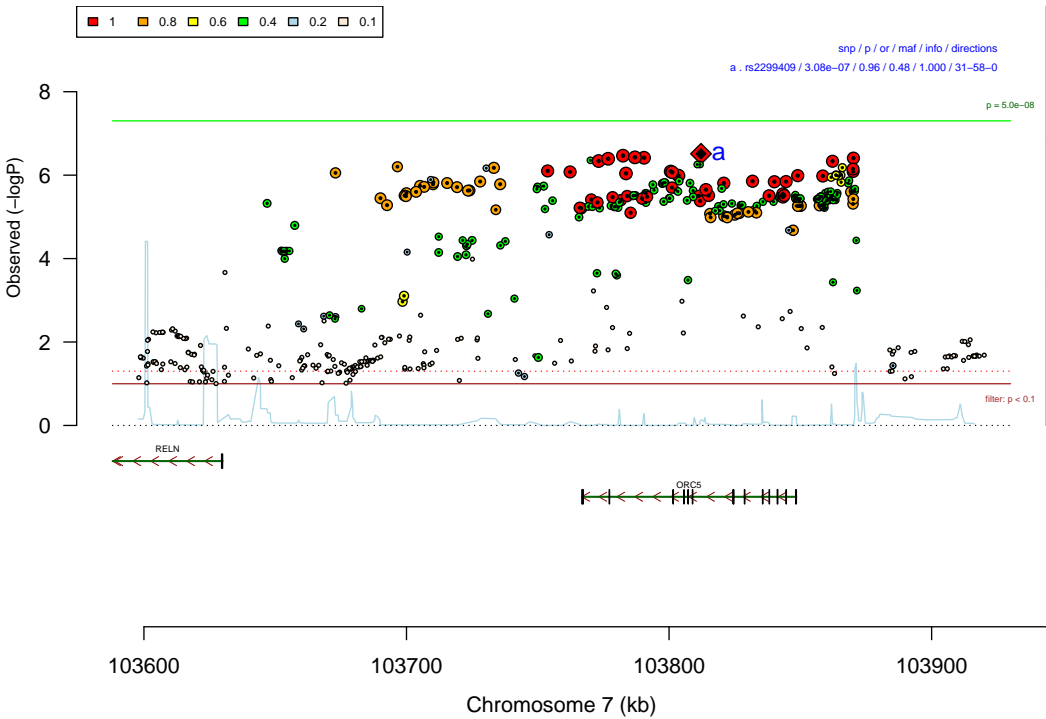

SCZ\_cond-rs2299409-chr7

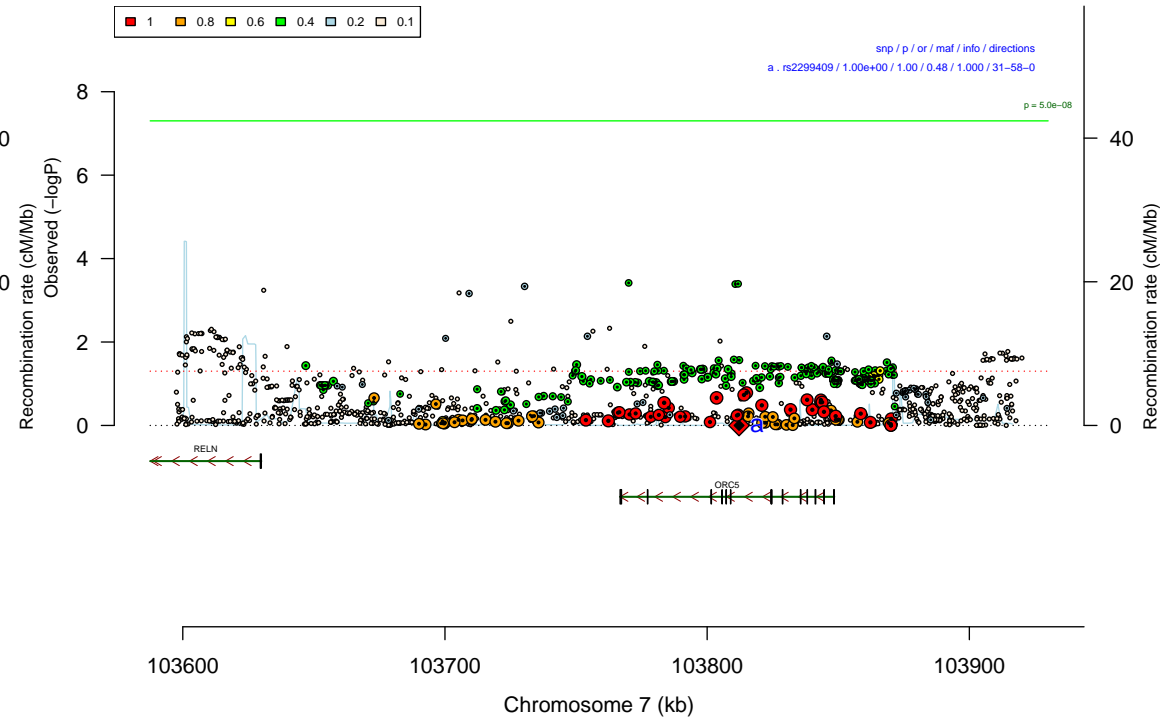

SCZ\_uncond-rs61928076-chr12

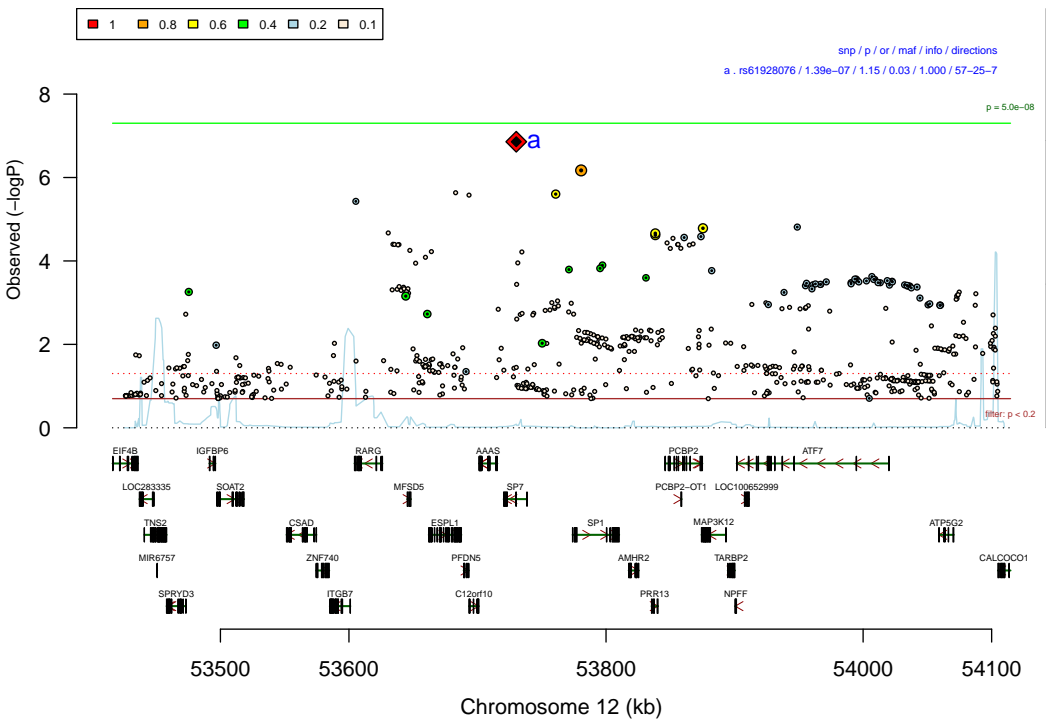

SCZ\_cond-rs61928076-chr12

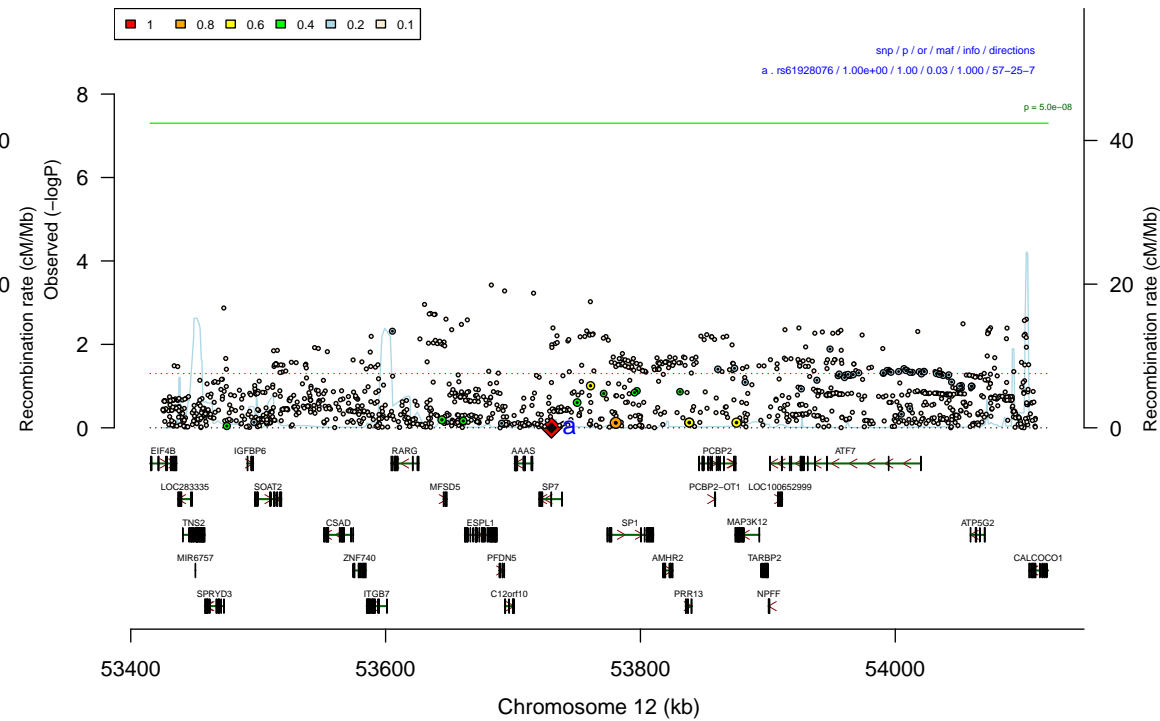

SCZ\_uncond-rs36029218-chr11

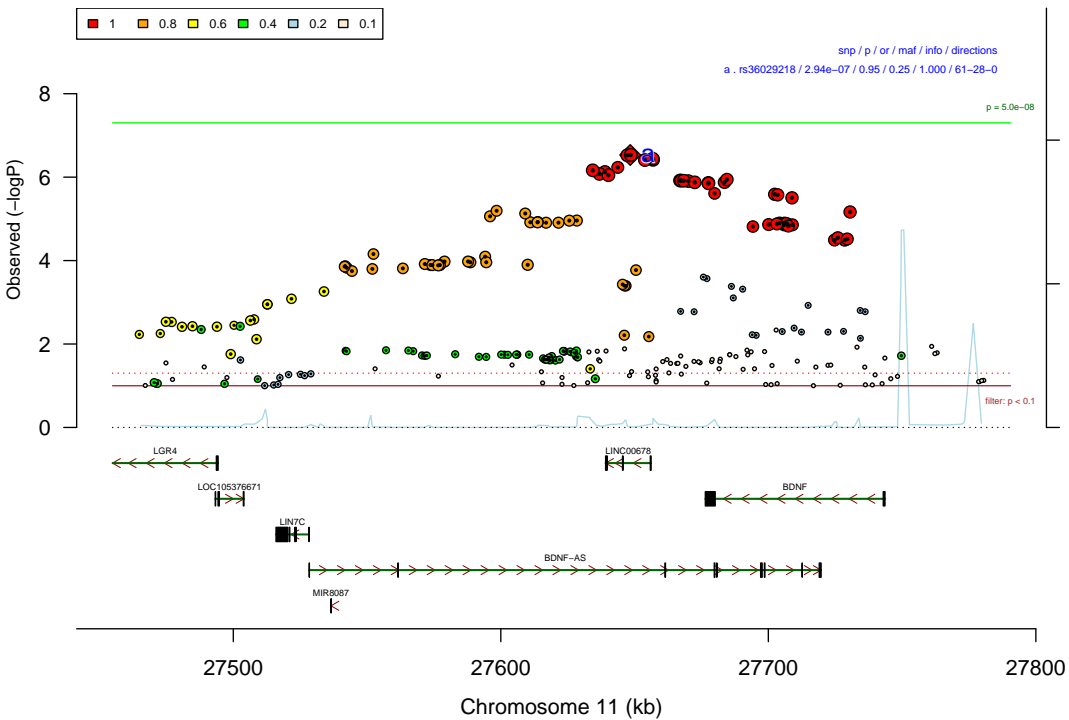

SCZ\_cond-rs36029218-chr11

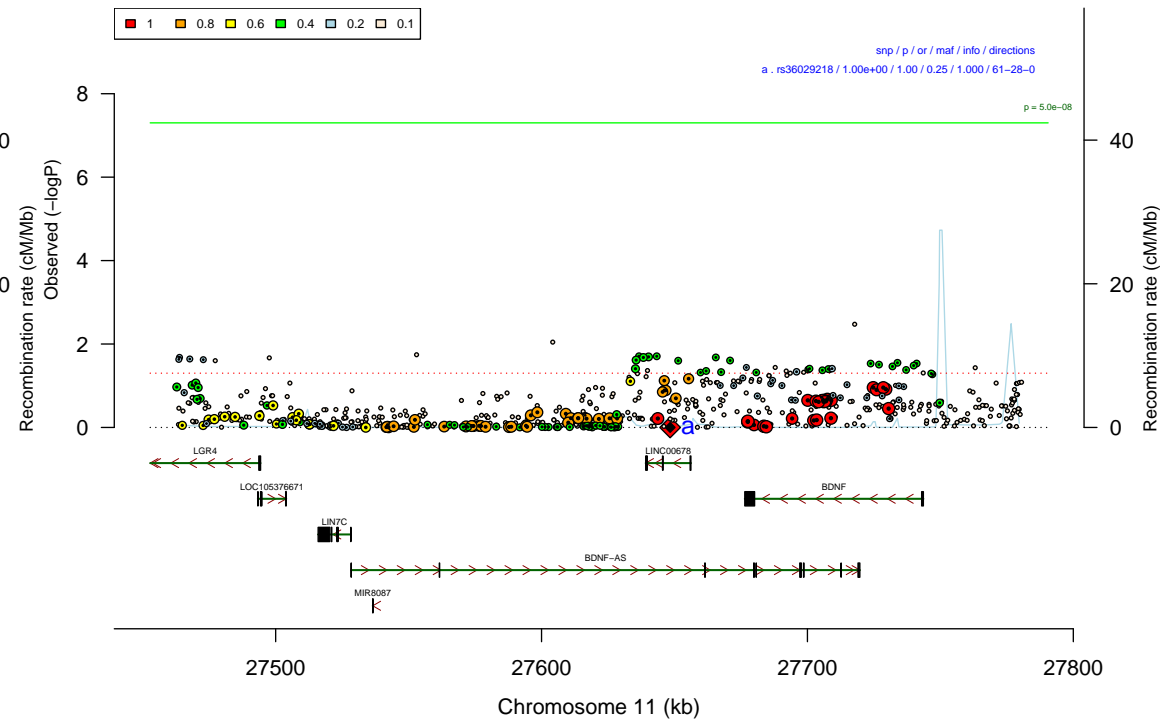

SCZ\_uncond-rs605765-chr11

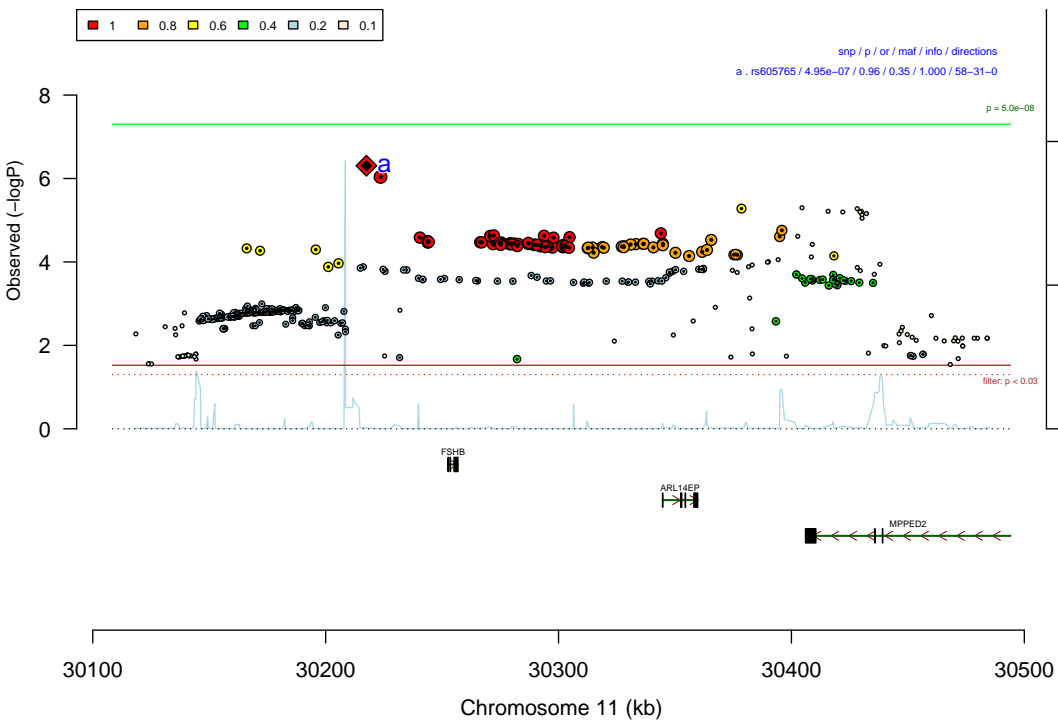

SCZ\_cond-rs605765-chr11

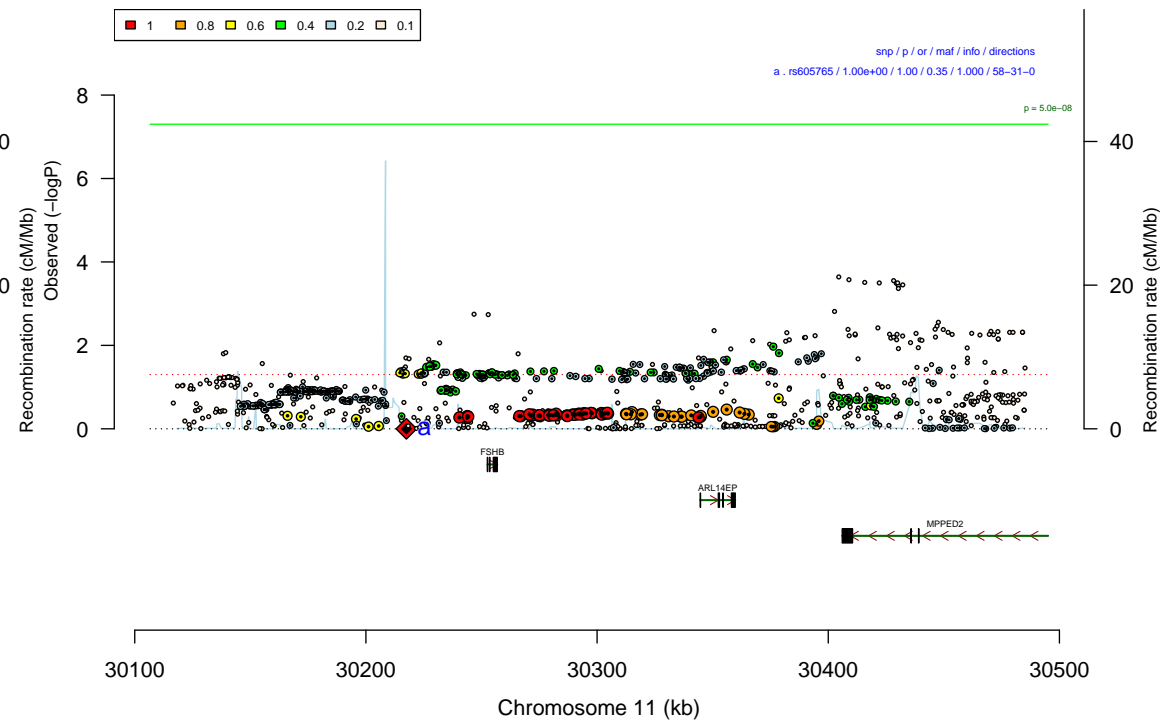

SCZ\_uncond-rs7378757-chr5

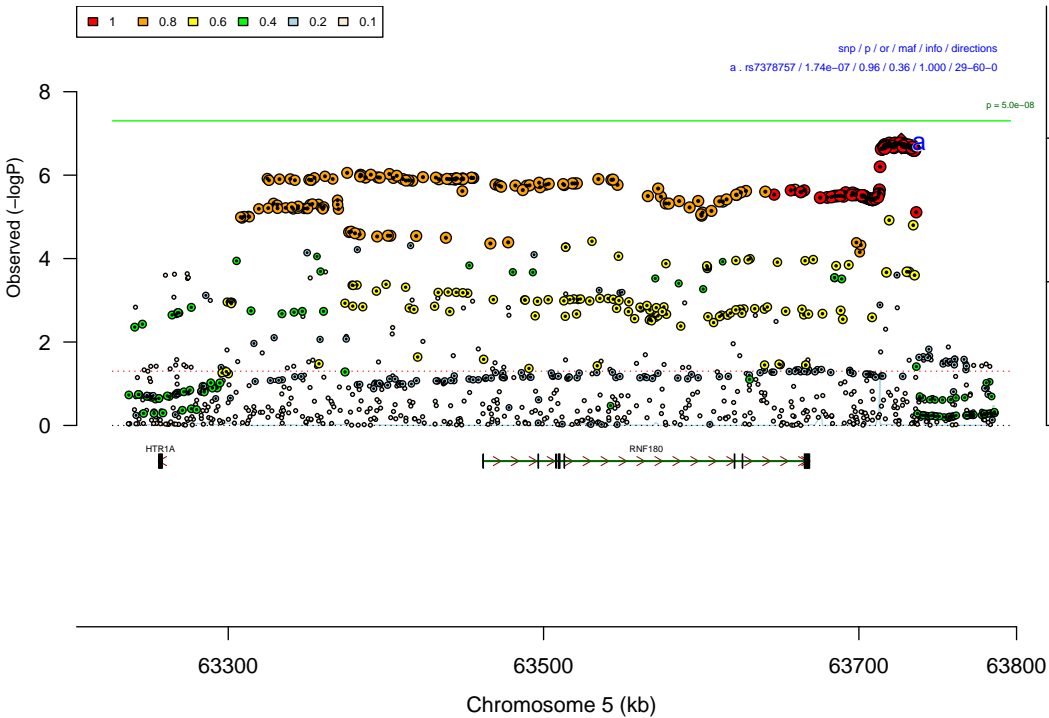

SCZ\_cond-rs7378757-chr5

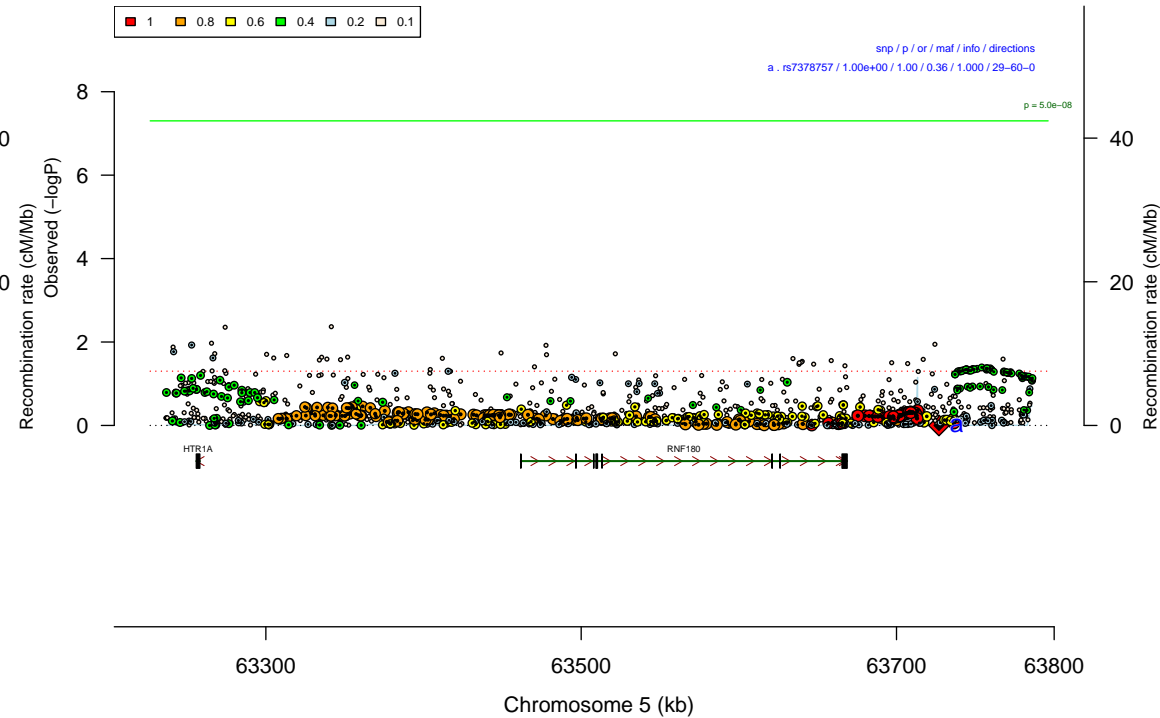

SCZ\_uncond-rs11854073-chr15

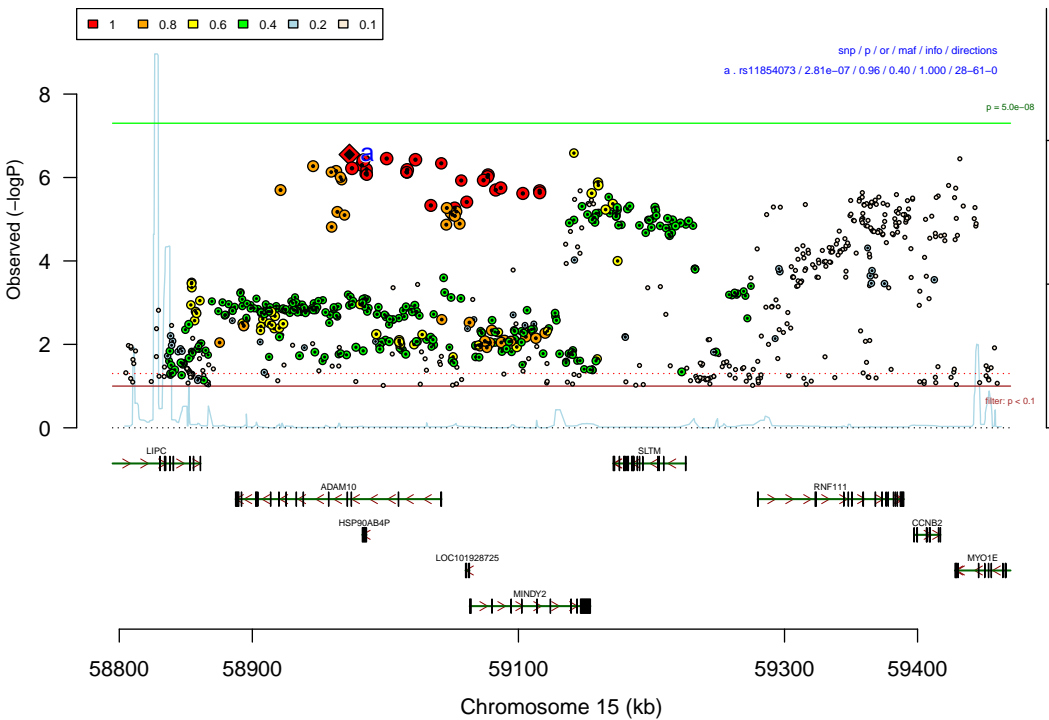

SCZ\_cond-rs11854073-chr15

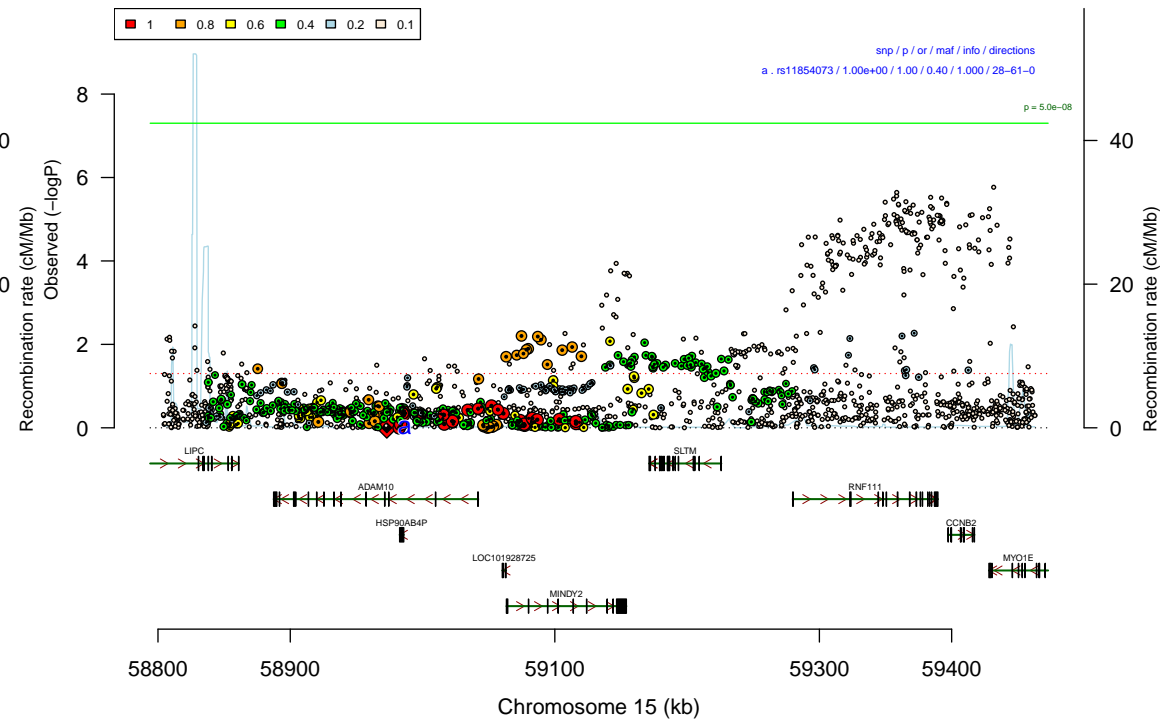

SCZ\_uncond-rs13219424-chr6

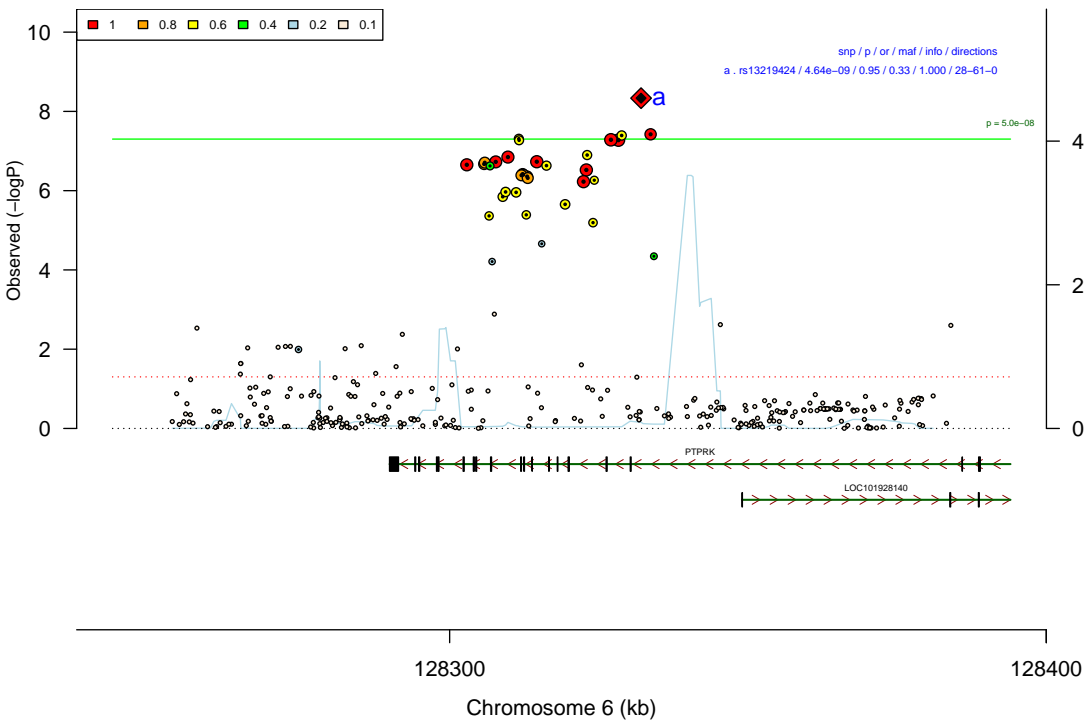

SCZ\_cond-rs13219424-chr6

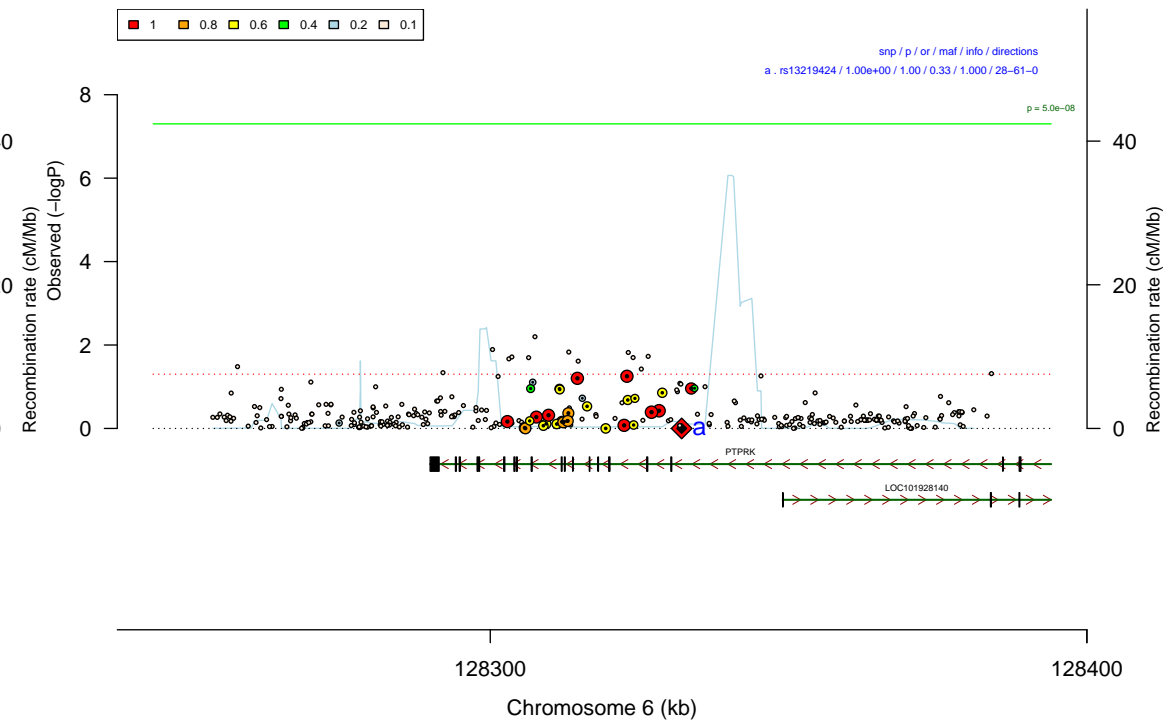

SCZ\_uncond-rs80249955-chr6

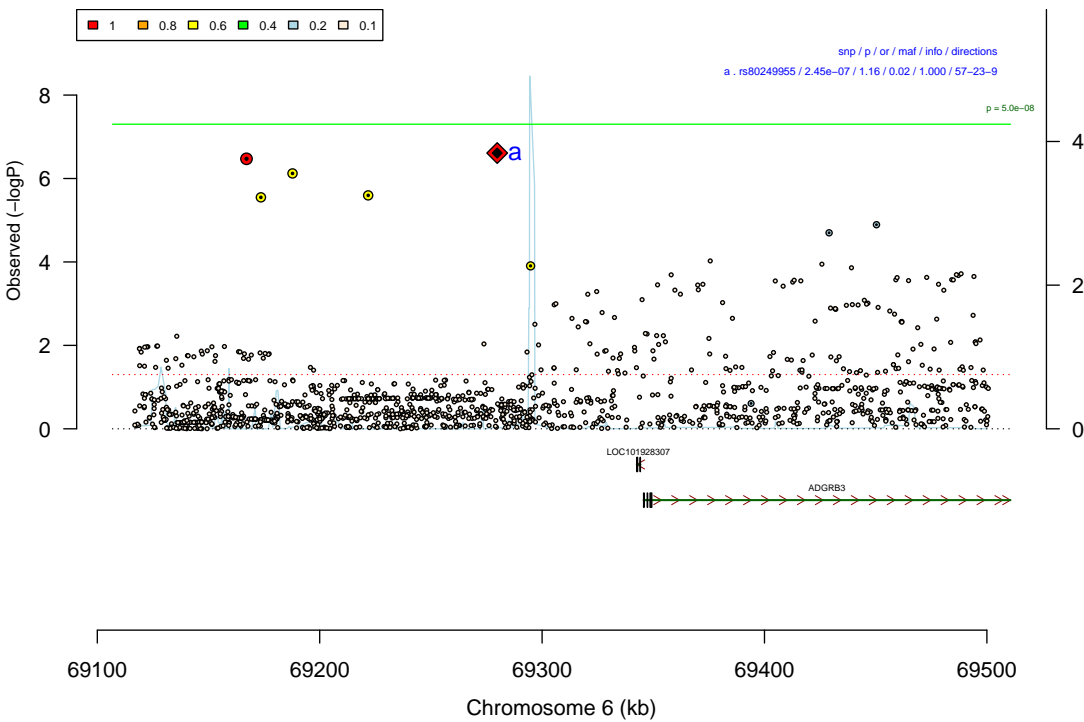

SCZ\_cond-rs80249955-chr6

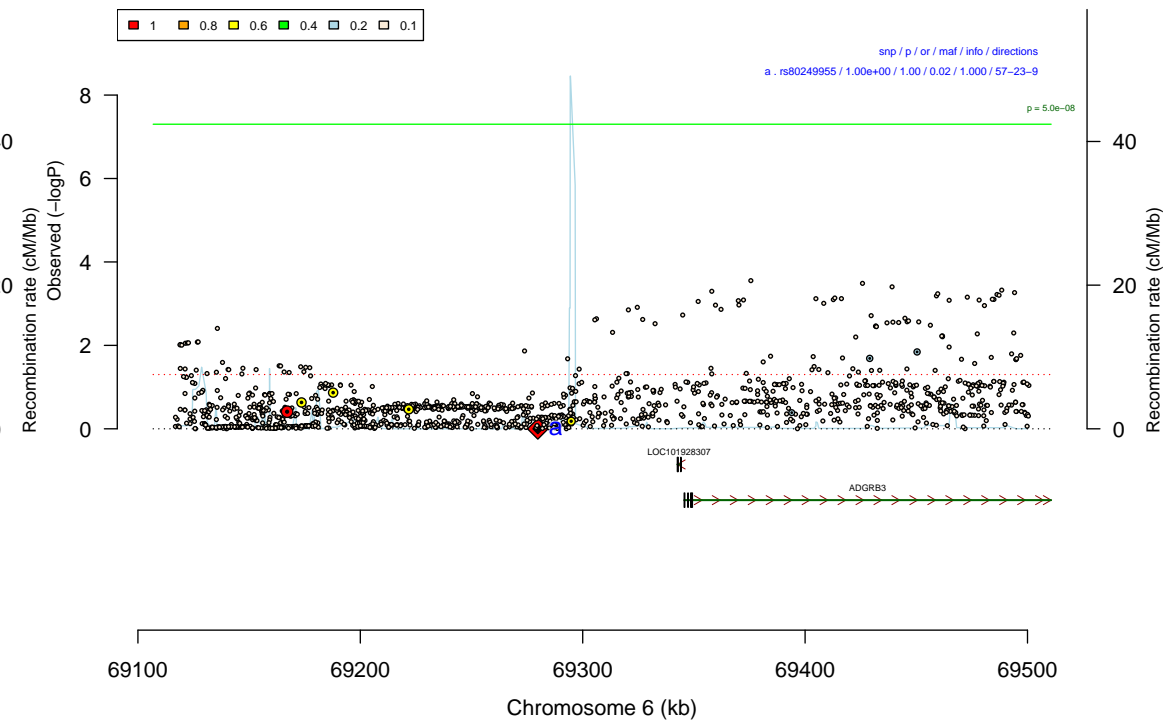

SCZ\_uncond-rs12311848-chr12

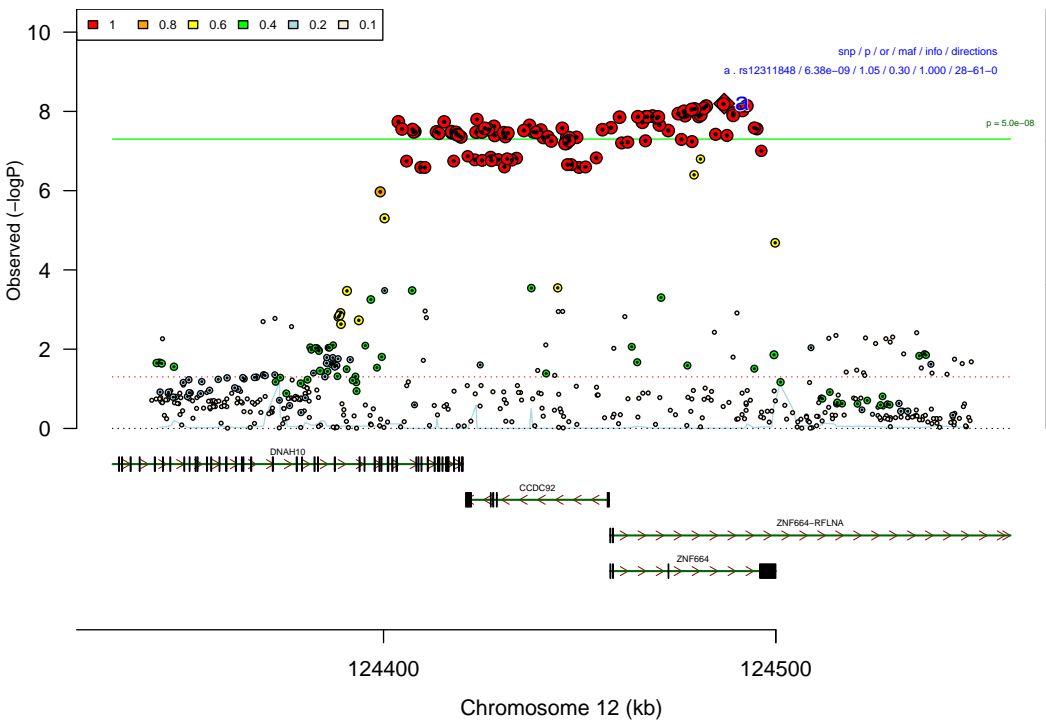

SCZ\_cond-rs12311848-chr12

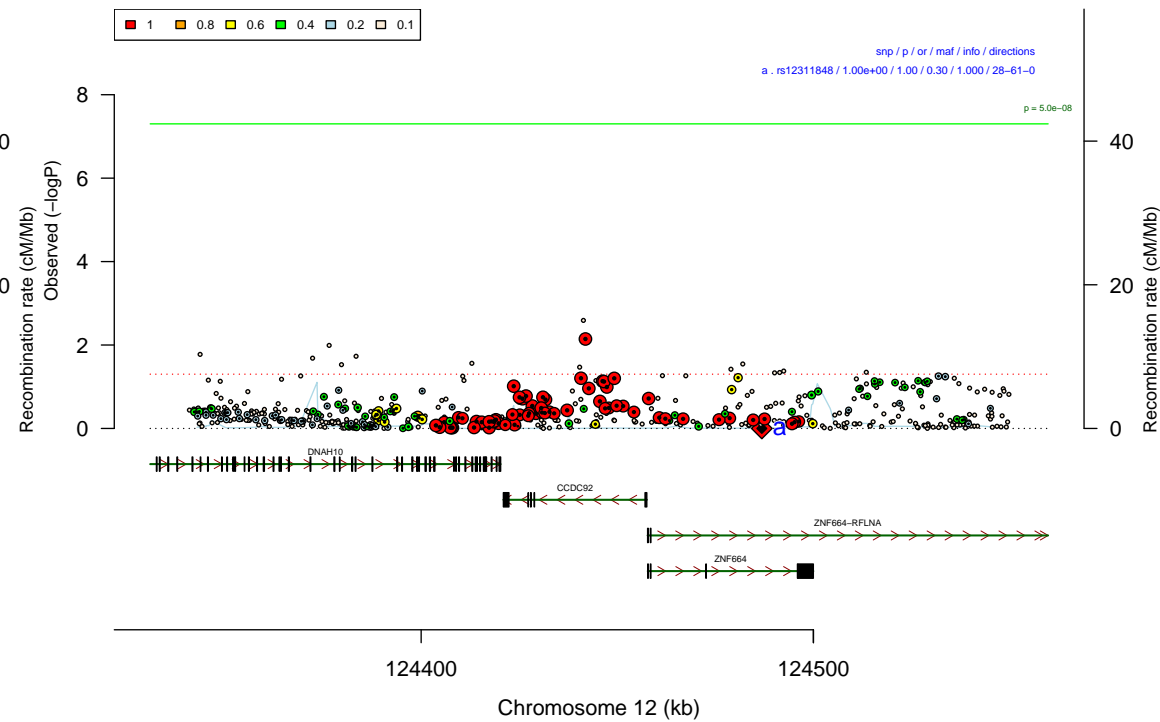

SCZ\_uncond-rs34019752-chr8

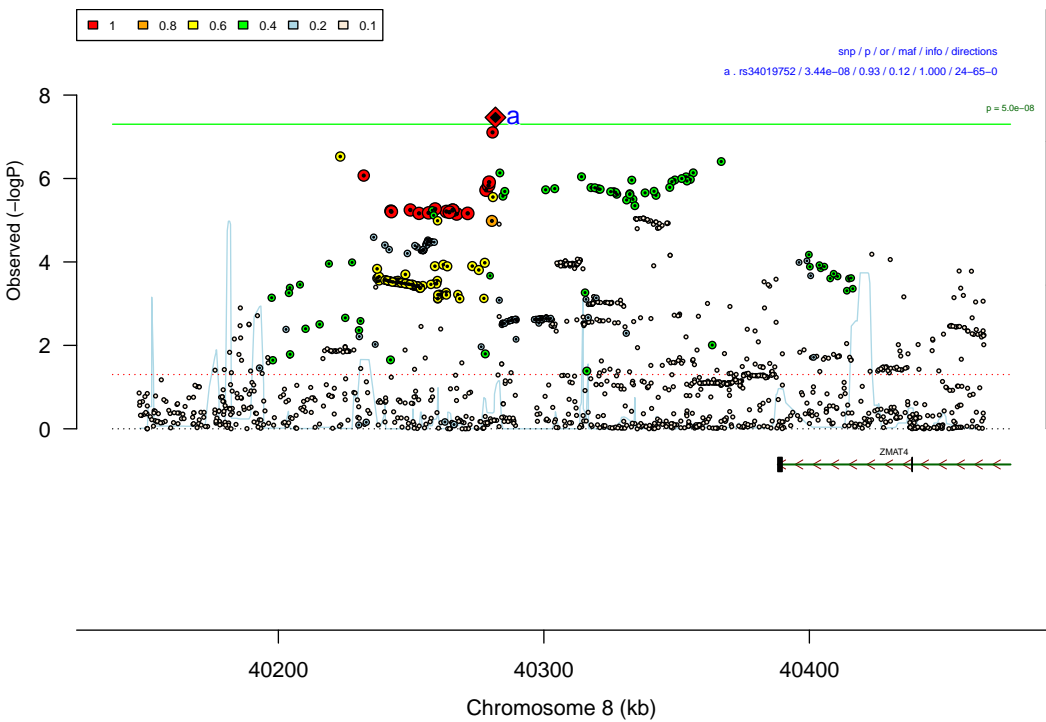

SCZ\_cond-rs34019752-chr8

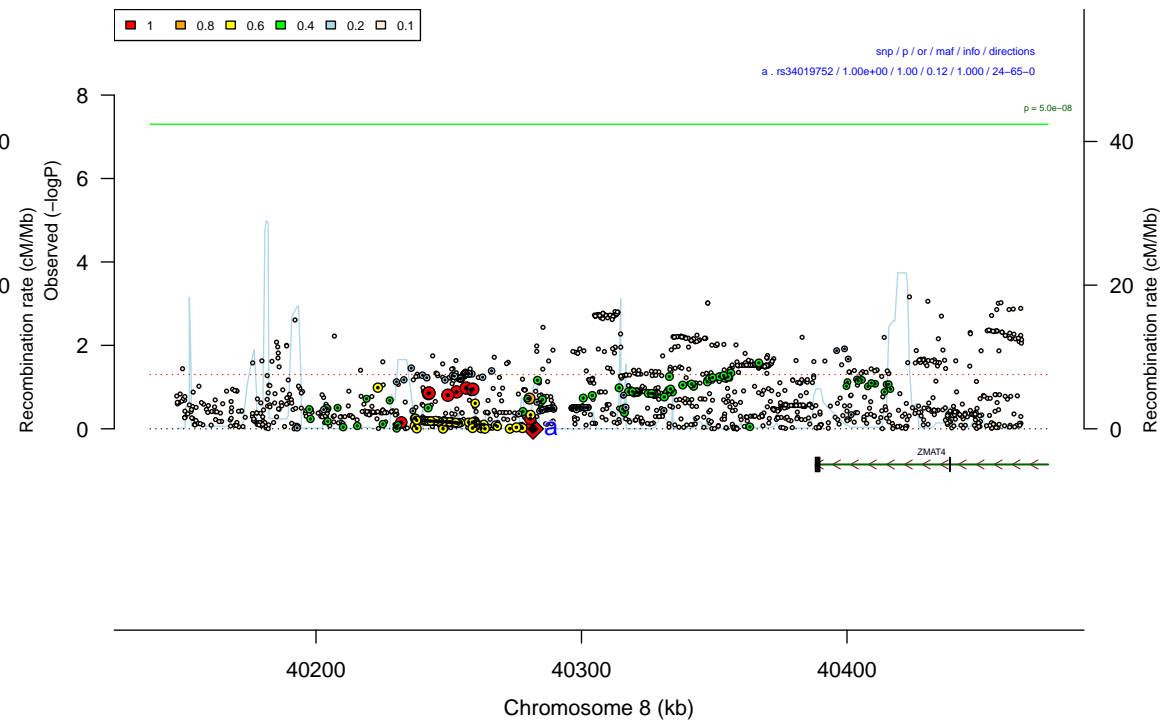

Supplement: Supplementary file [file 2020.09.12.20192922-5.zip]
