# Supplementary material
Source: bioRxiv or medRxiv preprint supplement (http://medrxiv.stage.highwire.org/highwire/filestream/96583/field_highwire_adjunct_files/4/2020.09.12.20192922-5.zip)

# QQ-plot.maf01.info6

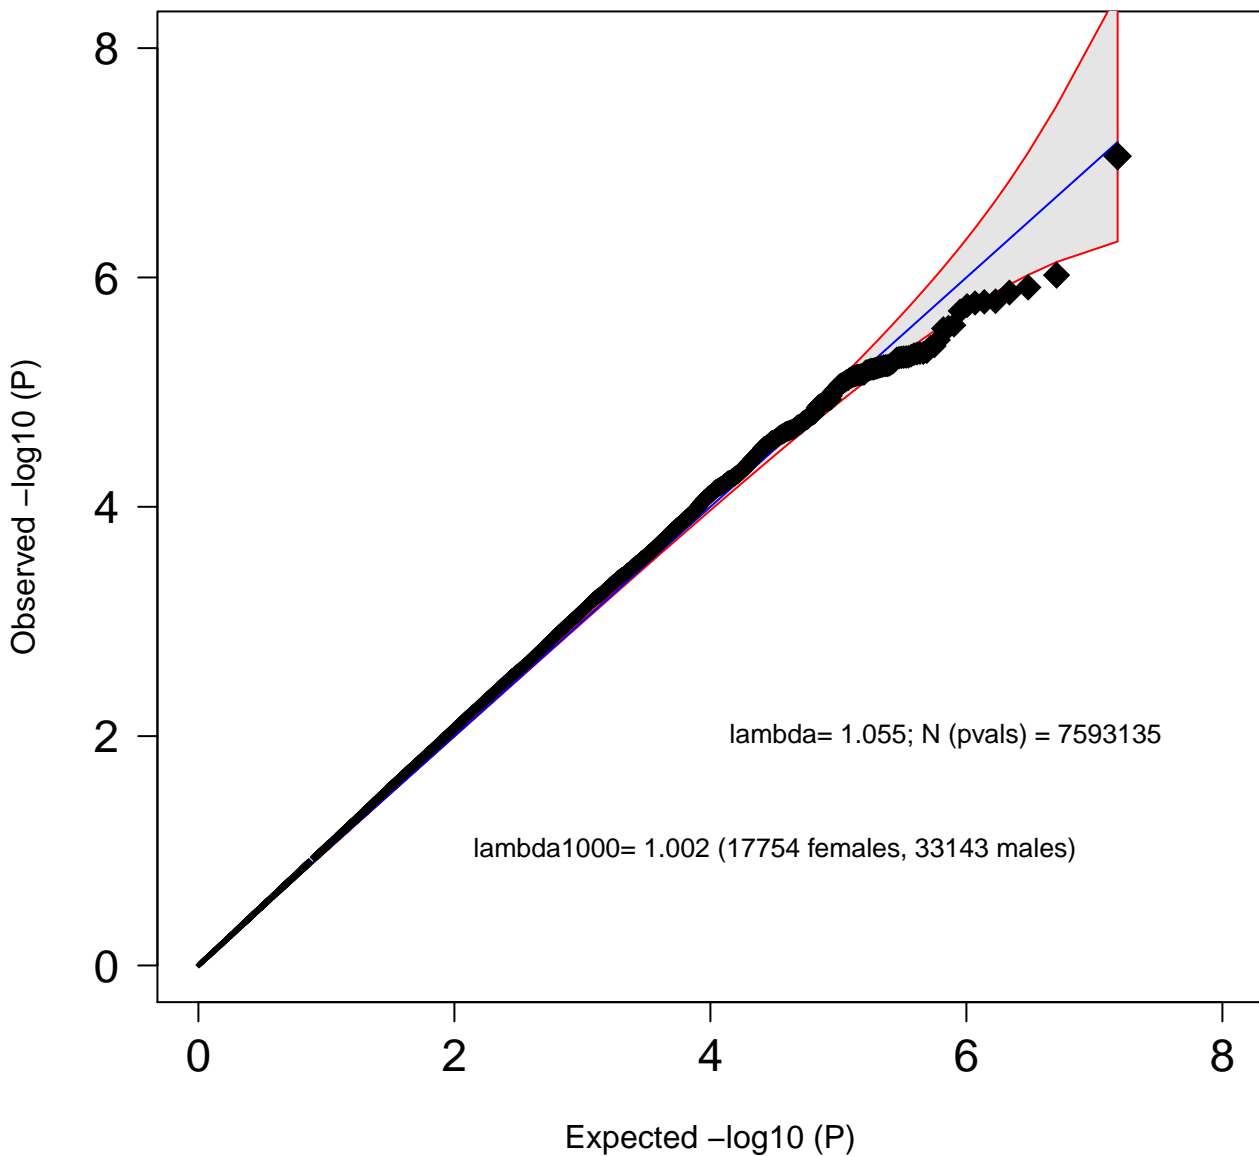

Supplement: Supplementary file [file 2020.09.12.20192922-5.zip]
