# Supplementary material
Source: bioRxiv or medRxiv preprint supplement (http://medrxiv.stage.highwire.org/highwire/filestream/96583/field_highwire_adjunct_files/4/2020.09.12.20192922-5.zip)

# FINEMAP vs CAFMAP

Adj R2 = 0.8301 Intercept = 0.040621 Slope = 0.92874 P = 6.622e-80

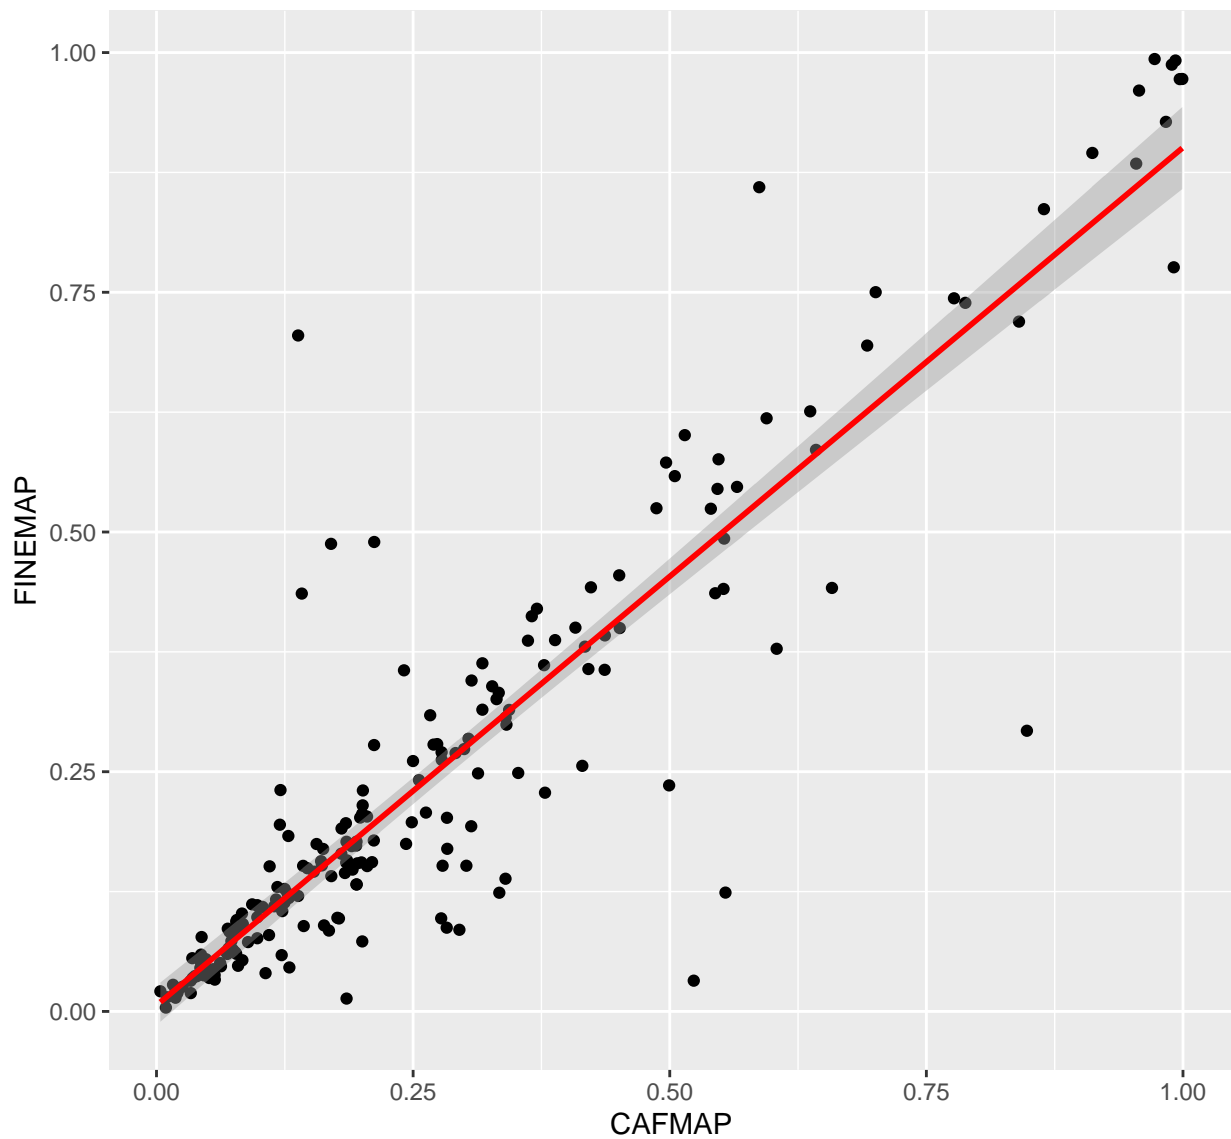

Supplement: Supplementary file [file 2020.09.12.20192922-5.zip]
