# Supplementary material
Source: bioRxiv or medRxiv preprint supplement (http://medrxiv.stage.highwire.org/highwire/filestream/96583/field_highwire_adjunct_files/4/2020.09.12.20192922-5.zip)

# Type 1+2, N = 4928

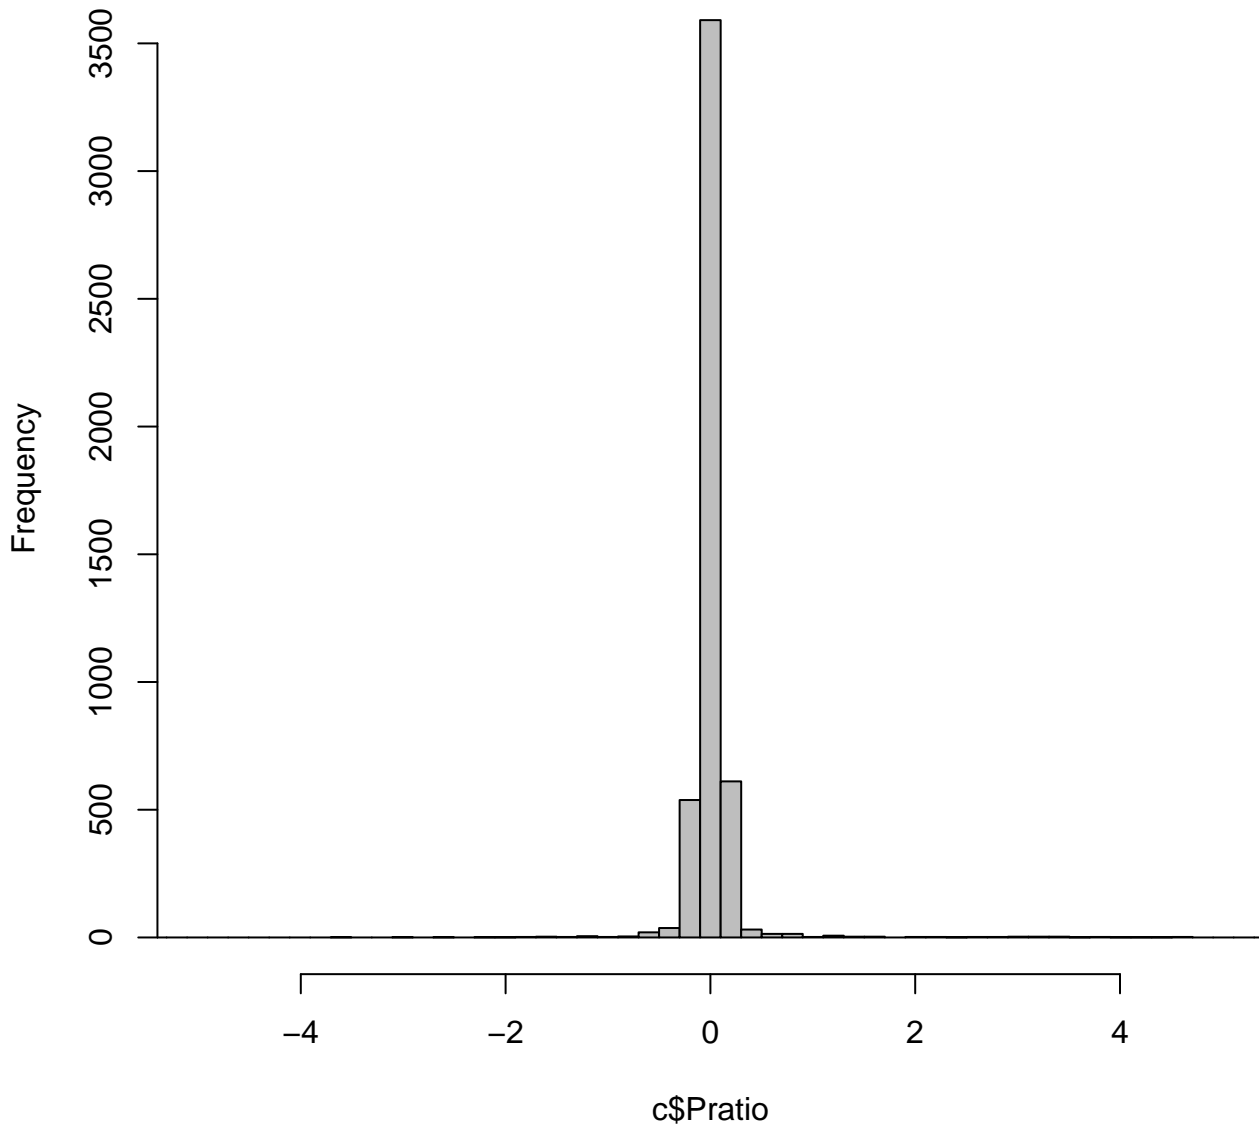

# Type 1+2, N = 4928

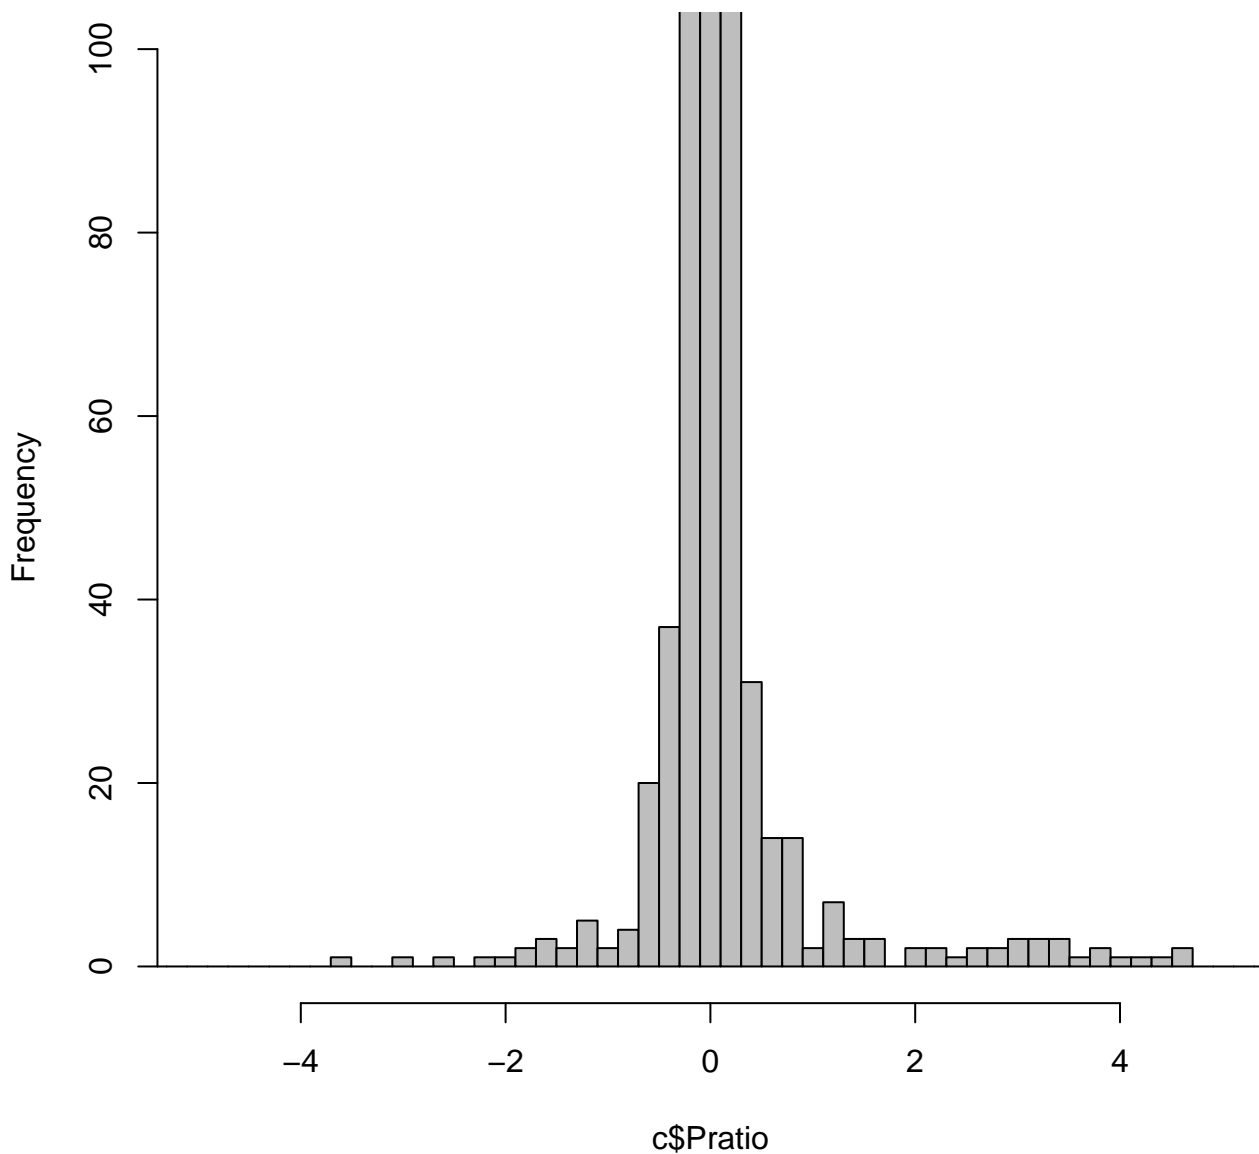

# Type 3, N = 81802

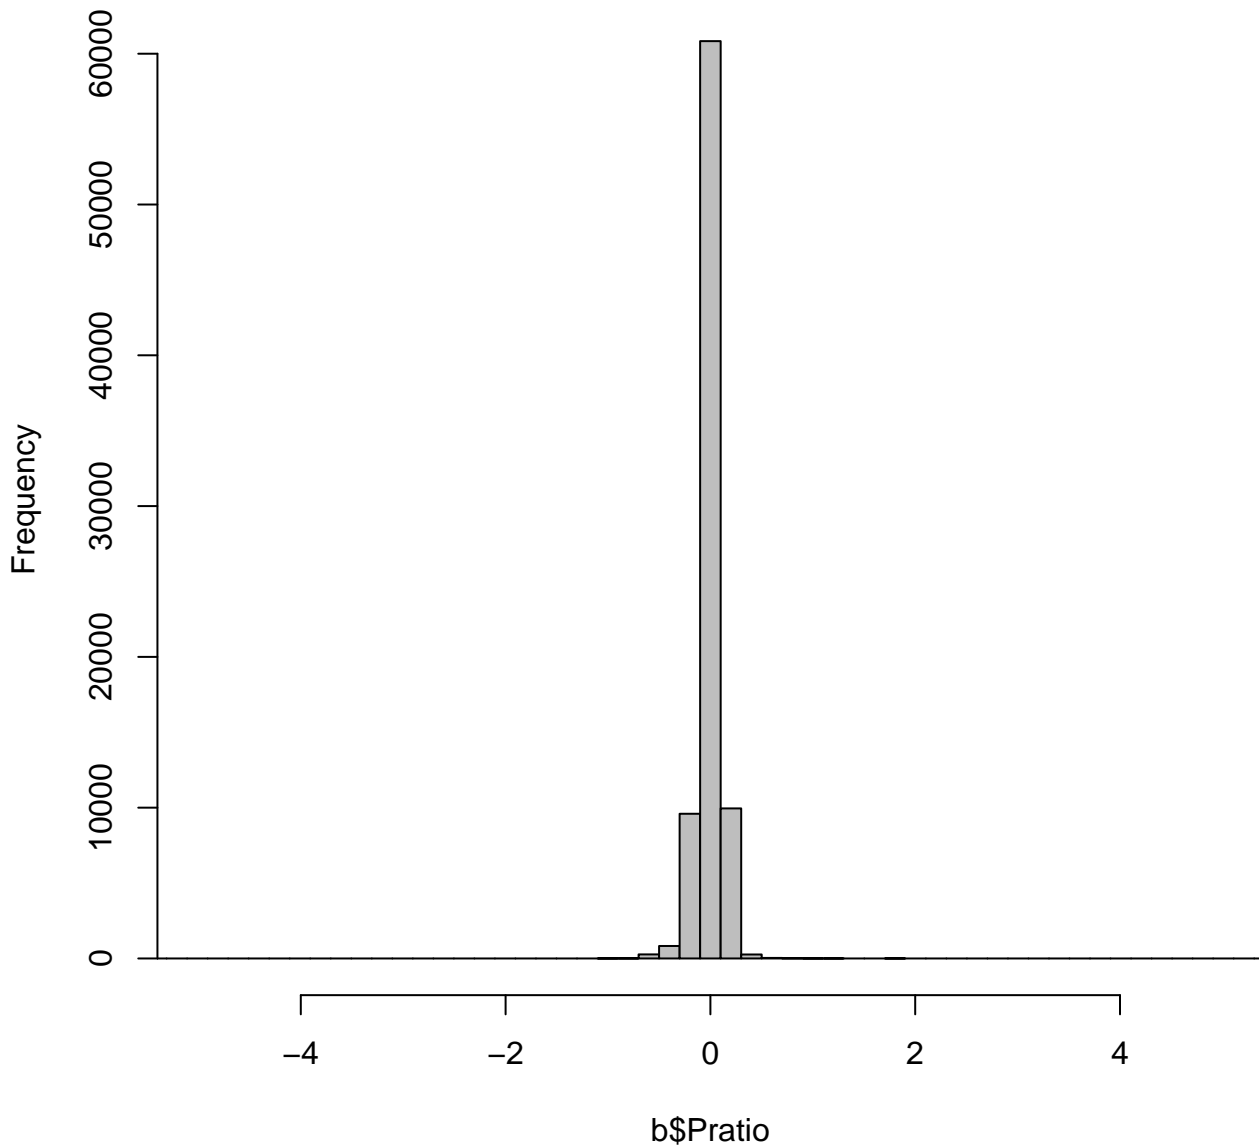

**Type 3, N = 81802**

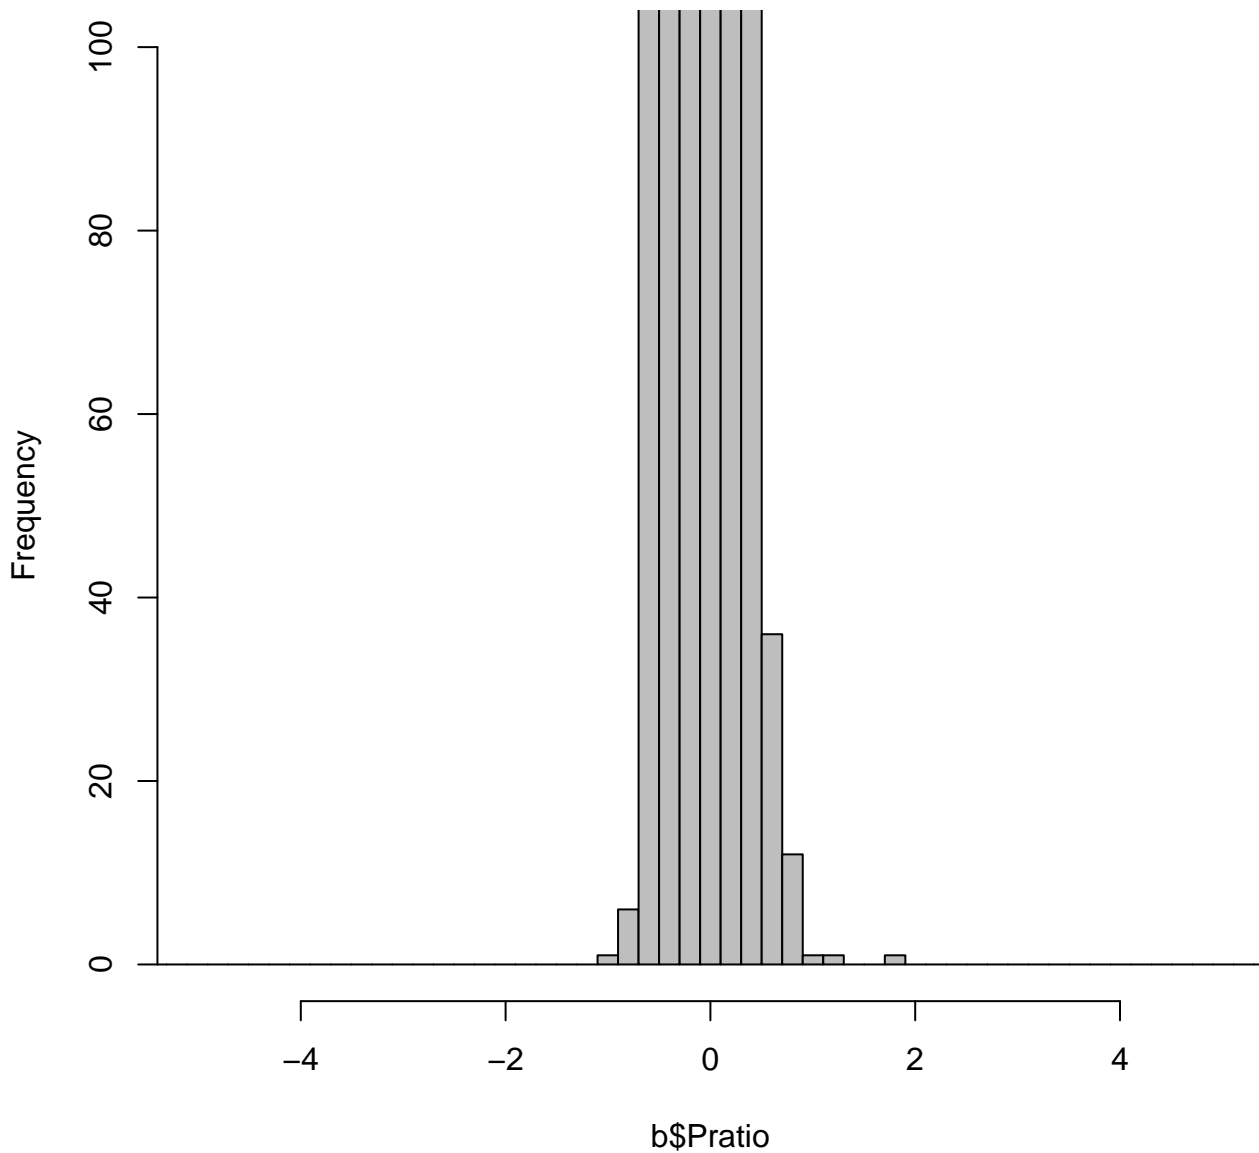

Supplement: Supplementary file [file 2020.09.12.20192922-5.zip]
